# Supplementary material for: Huntington disease oligodendrocyte maturation deficits revealed by single-nucleus RNAseq are rescued by thiamine-biotin supplementation
Source: PubMed Central journal article supplement (PMC9772349; doi:10.1038/s41467-022-35388-x), 2022-12-21

## 1 **Supplementary Results**

### 2 3 **Integration of OPCs and OL from all ages and regions**

4       The subclustered OPCs and OLs were also integrated across all ages and regions (**Supplementary Fig**  
5 **3c-f**). These data show similar clusters exist in each age and region with NT cells found mainly in clusters 0, 2,  
6 and 4 representing MOL & MFOL, OPCs, and NFOL, respectively; and R6/2 cells found in clusters 1 and 3  
7 representing a unique MOL group and COPs, respectively (**Supplementary Fig 3c & d**). Expression of OPC  
8 and OL maturation markers can be seen in **Supplementary Fig. 3e**, which suggests increased OPC commitment  
9 in R6/2 cells (COP cells with no *Pdgfra* and low OL marker expression (cluster 3 and 1)) and decreased OL  
10 maturation (MOL cells with downregulated OL marker expression (cluster 1)). Pseudotime analysis of the  
11 integrated data set also showed similar results with all ages and regions showing cells along a single trajectory  
12 with 1 branch point mainly consisting of R6/2 cells (**Fig 2d and Supplementary Fig 3f**). We next analyzed R6/2  
13 versus NT differentially expressed genes in the OPC and OL clusters which revealed similar results to our non-  
14 integrated data per age and region (**Supplementary Data 2**). Showing down regulation of OL maturation genes  
15 such as *Mobp*, *Mal*, *Neat1*, *Plp1*, and *Cldn11* and upregulation of genes like *Smarca2*. While OPCs showed  
16 upregulation of *Mbp*, *Plp1*, and *Smarca2*. These data suggest commitment of development in R6/2 OPCs in all  
17 ages and regions, and impaired maturation in OLs in all regions and ages. The pseudotime analysis reveals this  
18 is most significant in the striatum as more R6/2 OLs reach similar pseudotime values in the R6/2 cortex, relative  
19 to the NT (**Fig. 2d and Supplementary Fig. 3f**).

### 20 21 **WGCNA and Bnets**

22       To determine how mHTT disrupts the network structure of these modules elucidated in the NT state, we  
23 conducted module preservation analysis with R6/2 data (**Supplementary Fig. 4a & b**). Changes to the overall  
24 connectivity of the module members and in the structure of the subnetworks (node-to-node connectivity (kME),  
25 (edge weight)) would represent disruption of co-expression through mHTT pathogenic mechanisms. While all  
26 modules showed high levels of preservation in the R6/2 samples (**Supplementary Fig. 4a-d**).

27       Other bnets: Further exploration of other cell type-specific bnets revealed similar data and also a few  
28 similar hub genes including *Hs6st3*, *ErbB4*, and *Meg3* in the Ex neuron bnet (**Supplementary Fig. 4c**). Recurring  
29 themes were present in each of the cell type-specific bnets including GAG/proteoglycan related genes such as

30 *Tspan7* and *Gpc5* in the astrocyte bnet (**Supplementary Fig. 4b**). When searching our Ex neuron bnet we found  
31 that *GPR1*, *RORx*, and *snnrp70* seemed to have an important causal role in that specific network. We next  
32 looked at our yellow neuronal module which correlated with both MSN and Ex neurons but was anti correlated  
33 with glial cells. This network seemed to show 2 large subnetworks that separate hub genes mainly identified in  
34 the MSN versus Ex bnets, one containing *Frmd4b* and *snnrp70* and the other containing *Hs6st3*, *Dgkb*, and  
35 *Cacna2d3*. Generally, the prior subnetwork contained genes related to *Grp1* signaling and splicing (*Tra2a* and  
36 *Ddx5*) while the latter network contained genes related to protein glycosylation and glucose metabolism (*Dgkx*,  
37 *Hsxstx*, *Galntx*, *Gpcx*). A common link between these two pathways which seem to be playing an important role  
38 by their location in the hierarchical structure of the bnet are Neuregulin/ErbB signaling and *Lingo2*, both showing  
39 novel causal relationships amongst themselves and child nodes in both subnetworks. *Lingo2* has been shown  
40 to regulate EGF signaling and has a role in Parkinson disease <sup>1,2</sup>. These data show an important role for these  
41 pathways specifically in the pathogenesis of neuronal populations in HD.

42 Interestingly, our MSN and OPC/OL bnets are enriched for genes associated with schizophrenia <sup>3,4</sup>.  
43 Hypergeometric tests were used to assess statistical significance for overrepresentation of the schizophrenia  
44 genes in the causal networks. Including *Reln* and *Pcdh15* other genes were *Nrg1/3* and *ErbB4*, *Smarca2*, *PLCB1*  
45 a gene involved in diacylglycerol formation, *Htr4* a glycosylated transmembrane protein involved in G protein  
46 coupled receptor serotonin signaling, as well as other genes involved in synaptic function and GPCR and calcium  
47 signaling. These data connect both metabolism to these signaling pathways and suggest coordination of these  
48 genes towards pathogenesis in HD and schizophrenia. There is an emerging role of OLs in schizophrenia  
49 pathogenesis, and the genes identified in these 2 causal networks may be relevant to both diseases.

50 Hub genes in the Ex bnet included *Fam19A1* and 2 and *Frmd4b* which all play a role in GRP1 signaling  
51 that regulates insulin signaling and neuronal receptor trafficking <sup>5,6</sup>, *Rora* and *Rorb* which are nuclear receptors  
52 that regulate many biological processes including development, circadian rhythm, and glucose metabolism, as  
53 well as *snnrp70* an essential component of the spliceosome. These data indicate an important role for these  
54 pathways in cortical cells relative to striatal. Each of these hub genes showed a larger number of NT specific  
55 outward edges indicating a loss of relationship in HD, but surprisingly most of these genes were upregulated in  
56 R6/2 mice in their corresponding cell types.

## 58 Human snRNAseq data

59 The HD-caudate predominant myelinating OL Cluster 7 showed relatively high expression of several  
60 immune related genes such *FYB1*, *SYK* (**Fig. 5i**), *APOE* (identified in causal network), *CD74*, and *C3*  
61 (**Supplementary Fig. 7d, Supplementary Data 7**), reminiscent of the immune oligodendroglia described in  
62 multiple sclerosis<sup>7</sup>. To further characterize the major gene programs that drive OL and OPC clusters<sup>7</sup>, we  
63 discovered correlated gene modules using the Louvain community analysis algorithm in monocle3. The gene  
64 module expression scores are plotted in heatmap by lineage, cluster, and grade (Condition) in **Supplementary**  
65 **Fig. 7e**, showing that gene modules were largely specific for either OPCs or OLs, and that there are cluster and  
66 grade specific modules. Module 2 was most highly expressed in cluster 7, and the GO enrichment analysis of its  
67 genes reveal they are related to immune system and cytokine signaling. Module 10 showed highest scores  
68 across HD grades, and its genes were enriched in GO terms related to response to stress, splicing, lipid and  
69 atherosclerosis, and antigen processing and presentation. Moreover, module 19 was most highly expressed in  
70 HD grades including HDJ, and its genes were related to GTPase function. Finally, module 8 was highest in  
71 cluster 2, 3, and 6 and HD grade 3, and its genes were related to ribosomal function and translation  
72 (**Supplementary Fig. 7e & f**). The module genes and scores by cluster, condition, and lineage are provided in  
73 **Supplementary Data 9**.

## 75 Validation of OL pathology in human HD and mouse data

76 To confirm OL gene expression abnormalities in HD, we performed WB analysis for myelin related genes  
77 MBP and MAG, which were downregulated at the RNA level in both mouse and human data, hub gene *SGK1*,  
78 and metabolism related genes *DGKB* and *GPI*, which are dysregulated in both the mouse and human OL and  
79 OPC data. Protein levels of MBP and MOG were not significantly altered in the HD cingulate cortex  
80 (**Supplementary Fig. 8b and c**). Conversely, protein levels of MBP (but not MAG) were increased in the caudate  
81 nucleus (**Supplementary Fig. 8b and c**). Protein levels of SGK1 were significantly decreased in the cingulate  
82 and caudate of HD brains (**Supplementary Fig. 8b and c**).

83 Given that MBP levels were reduced at RNA levels, we were surprised to see increased MBP protein  
84 levels in the caudate. This could be explained by an increase in OL numbers. We therefore performed  
85 immunofluorescence labeling for Carbonic Anhydrase II (CA2), expressed in OL but not OPCs<sup>8</sup>, on caudate and

86 cingulate of control and HD cases, and MBP in the caudate (**Supplementary Fig. 8d**). An unaltered or reduced  
87 ratio of MBP to CA2 signal in HD compared to controls would indicate a relative decrease of MBP per OL. The  
88 results show a reduced MBP:CA2 labeling ratio, suggesting that despite the overall increase in MBP protein  
89 levels, there was a general decrease in MBP when normalized to oligodendrocyte numbers (**Supplementary**  
90 **Fig. 8e**). We confirmed the increased CA2 result using chromogenic IHC on a larger cohort, which revealed a  
91 significant increase in the proportion of CA2+ cells in the caudate and cingulate (**Supplementary Fig. 9a-d**).  
92 Moreover, as previously reported, the overall cell density in the HD caudate was increased, consistent with gliosis  
93 (**Supplementary Fig. 9c**).

94 For additional mouse validation, we examined the protein levels of the hub genes and glucose and lipid  
95 metabolism related genes that are potentially relevant to OL pathology, including *Sgk1*, *Gpi1* and *Dgkb*, using  
96 quantitative western analysis (Licor) (**Supplementary Fig. 9e&f**) on striatal and cortical tissue collected from  
97 additional R6/2 and NT mice (n=6/group). A significant difference was observed for the following proteins: *Sgk1*  
98 levels were lower in the cortex, *Dgkb* levels were lower in the striatum (**Supplementary Fig. 9a-d**).

99 Finally, we carried out *in situ* hybridization to examine dysregulation of HD OLs in human brain. The  
100 snRNAseq results showed that OLs from the three anatomic regions upregulated transcription of *SPP1*,  
101 increased in oligodendrocytes in the cuprizone model of demyelination<sup>40</sup>, and *NEAT1*, increased in HD and  
102 implicated in promoting neuronal survival<sup>41</sup>. We performed *in situ* hybridization for *SPP1*, *NEAT1*, and *MBP* in  
103 the cingulate, caudate, nucleus accumbens (**Supplementary Fig. 9g**). Of these regions, caudate and  
104 accumbens parenchymal OLs showed increased *SPP1* expression (**Supplementary Fig. 9h&i**), and caudate  
105 parenchymal OLs showed increased *NEAT1* expression (**Supplementary Fig. 9h**). OLs in the white matter of  
106 the nucleus accumbens and caudate did not show significant changes in *NEAT1* and *SPP1* expression  
107 (**Supplementary Fig. 9h&i**). These results are consistent with a compensatory signature of OL in HD, whereby  
108 HD OL upregulate signals to promote survival and myelination. Furthermore, the data localizes the signature to  
109 parenchymal rather than white matter OLs.

110  
111  
112  
113

114 **Supplementary Figure Legends**

115

116 **Supplementary Figure 1. Annotation of human and mouse snRNAseq data and integrated data from both**

117 **age and regions in R6/2. a)** Mouse umaps colored by expression of *Pdgfrb* and *Tek* showing the clustering of

118 vascular cells with astrocytes. **b)** tSNE plots of the human snRNAseq results showing color-coded by anatomic

119 region (Left), and grade (Right). **c)** Dotplot of human snRNAseq showing expression of cell type markers per

120 cluster. **d)** Dotplot showing the expression of select cell type markers across all clustered identified in the mouse

121 data. Venn diagrams showing overlap of all DEGs between 8 and 12w, for both striatum (str) and cortex (ctx). **e)**

122 UMAPs of integrated mouse data colored by region (top left), Cell type (top right), and age (bottom).

123

124 **Supplementary Figure 2. Top 5 GO terms and KEGG pathways for DEGs per a cell type and age/region.**

125 **a)** Top 5 GO terms per cluster in 8 and 12w striatum and cortex. **b)** Top 5 KEGG pathways in 8 and 12w striatum

126 and cortex. Functional impairment such as focal adhesion, cytoskeleton, ErbB and axon guidance in OLs that

127 suggest a loss of cell-to-cell communication between OLs and neurons. KEGG pathway analysis also highlighted

128 metabolic pathways including TCA cycle, O-glycan biosynthesis, amino and nucleotide sugar, sucrose, and

129 pentose phosphate pathways.

130

131 **Supplementary Figure 3. Cell type agnostic DEGs and KEGG metabolic gene networks, and integrated**

132 **OPC and OL data. a)** Heatmaps and hierarchical clustering of normalized mean expression values in all glial or

133 neuronal cells of the top cell type agnostic DEGs. Cell color represents row min (seafoam green) and max

134 (orange). **b)** Network showing all KEGG metabolic genes significantly dysregulated across the 8w Str DEGs and

135 both cortical dataset from every cell type. Node size is equal to the number of cell types in which the gene is

136 found to be significantly dysregulated and node are colored by up and down regulation (orange = up and blue =

137 down) **c)** UMAPs of integrated OPC and OL data from both ages and regions, colored by (top) genotype and

138 (bottom) age/region. **d)** Cell number proportions by genotype in clusters 0, 1, 2, 3, and 4; corresponding to MOL,

139 MOL, OPC, COP, NFOLs, respectively. **e)** Violin plot showing expression of OPC and OL marker and maturation

140 genes in OPC and OL cells from all ages and regions, by cluster. **f)** Pseudotime plot of integrated OPC and OL

141 data from both ages and regions, colored by genotype, age, and region.

142

143 **Supplementary Figure 4. Module preservation statistics between R6/2 and NT.** Z summary preservation  
144 values > 20 for all modules and correlation > 0.78 with p values < 1.2e-53. **a)** Z-summary/density/connectivity  
145 values for module preservation. **b)** scatter plots showing kME between NT and R6/2 per module.

146

147 **Supplementary Figure 5. Merged causal networks for microglia, astrocyte and excitatory neurons.** **a)**  
148 Barplot of  $-\log_{10}(\text{pvalues})$  from hypergeometric test of overlap between cell type DEGs and WGCNA cell type  
149 modules. **b)** Causal network for microglia. **c)** Causal network for astrocytes. **d)** Causal network for excitatory  
150 neurons. **b-d)** See **Fig. 4** legend for description of network. **e)** Causal network for oligodendrocytes merged with  
151 gene regulatory networks from IRIS3 regulon prediction.

152

153 **Supplementary Figure 6. ATACSeq supplementary data.** **a)** Visualization of read density across *Camk2a* and  
154 *Olig2* in *neun*+/- ATACseq data, and predicted SMARCA4 from BIRD analysis on human snRNAseq data. **b)**  
155 Volcano plots showing differential binding scores, and  $-\log(\text{pvalue})$  differences of TF binding in open chromatin  
156 in 8 and 12w, striatum and cortex *NeuN* +/- cells. blue = top20 by differential binding score, orange = pvalue  
157 <0.05. **c)** Venn diagrams of overlapping TFs from ATACseq footprinting analysis per region and age. *NeuN*+  
158 cells have some similarities with the *NeuN*- showing differential binding of *Zbtb14* and *Hes1*, although in opposite  
159 direction, in several ages and regions, but also showed an enrichment for immediate early genes *Jun*, *Fos*, and  
160 *Mef2c/b/d*.

161

162 **Supplementary Figure 7. Human samples snRNAseq supplementary data.** **a-b)** tSNE plot showing the  
163 human snRNAseq data color-coded by donor (**a**) and sequencing batch (**b**). **c)** The relative contribution of HD  
164 grade to OL and OPC clusters is shown in bar plots. **d)** Gene expression violin plots showing the expression of  
165 select genes in OL and OPC clusters. OPC genes *VCAN*, *BCAN*, *SOX6*, *PDGFRA*, *CSPG4* are most highly  
166 expressed in clusters 5 more than 4, while *TCF7L2* is more expressed in cluster 4 – suggesting it is more  
167 committed. Immune OL's genes *CD74* and *APOE* are expressed in cluster 7. Myelin-related genes are  
168 expressed in the remaining clusters – see text for details. **e)** Gene correlation network analysis as performed in  
169 *monocle3*, showing the module scores against lineage, condition, and cluster. **f)** KEGG and Reactome pathway

170 enrichment analysis in select module genes. The negative log 10 of the adjusted p value is indicated on the x-  
171 axis, and the term name on the y-axis. Hypergeometric test used for analysis.

172  
173 **Supplementary Figure 8. KEGG metabolic genes in human data and validation OL maturation deficits**

174 **and increased OL lineage cells in the cingulate and caudate. a)** Network showing all KEGG metabolic

175 genes significantly dysregulated across the human OPC and OL DEGs overlapping with the mouse 12w striatal

176 DEGs. The color of the node indicates direction of DEG: orange = up and blue = down in HD. **b)** Western blot

177 of OL maturation genes and key drivers in HD and control patient cingulate cortex and caudate. Source data

178 are provided as a Source Data file. **c)** Quantification of western blot results. Two-tailed Mann Whitney test

179 used for each statistical analysis. Exact p-values: Cingulate: MAG-0.2251, MBP-0.5743, SGK-0.0897;

180 Caudate: MAG-0.2912, MBP-0.0055, SGK-0.0055. n= 3 control and 11-12 HD caudate samples, and 5 control

181 and 11-12 HD cingulate samples. Data shown as mean +/- SEM as error bars. **d)** Representative images of

182 MBP and CA2+ OLs in HD and control postmortem brain showing an increase in CA2+ OLs in the HD brain.

183 **e)** Ratio of MBP intensity relative to CA2 positive OLs, showing a decrease in MBP per an OL. Exact p-value:

184 0.032. n = 3 HD and 4 control caudate stained sections, biologically independent samples. Two-way Mann

185 Whitney test used for statistical analysis. Data shown as median (center line), inner quartile range (box), and

186 min and max values as whiskers.

187  
188 **Supplementary Figure 9. Validation of increased OL and OL stress in the caudate and accumbens, and**

189 **protein validation of mouse data. a)** Immunohistochemical stains for Carbonic Anhydrase II (CA2), a general

190 marker for OLs that is also expressed in early lineage OLs but not OPCs. Control and HD panels are shown in

191 the left and right, respectively. Images of the representative regions in the cingulate cortex (Upper row) and

192 caudate nucleus (lower row) are shown. Scale bar = 50 microns. Quantification of percentage of cells that are

193 positive for CA2 in the caudate (**b**), and cingulate (**d**), and density of cells per unit area (**c**). The results are shown

194 as boxplots with median (center line), inner quartile range (box), and the bars representing the minimum and

195 maximum values as whiskers. One-tailed t-test was used to determine statistical significance. The p-values are

196 noted on the graphs. n= 6 control and 8 for HD – for b-c, and n = 6 control and 4 HD for d. (**e and f**). Protein

197 quantification and Licor images of select DEGs and mHTT (5492) in R6/2 and NT striatum and cortex. **e)** Licor

198 images of mHTT (5492), Prkce in the insoluble fraction, Sgk1, Dgkb, Gpi1 and respective revert in R6/2 and NT  
199 striatum and cortex. Source data are provided as a Source Data file. **f**) Quantification of licor results. One-way  
200 ANOVA used for statistical analysis. Data shown as mean +/- SEM as error bars. n = 6 NT and 6 R6/2 biologically  
201 independent samples. **g-i**) Representative images showing in situ hybridization for SPP1 (red), MBP (green),  
202 NEAT1 (white), and nuclei (DAPI - blue) in the control and HD caudate nucleus (**g**). The areas marked P  
203 represent pencil fibers of Wilson. The dashed boxes are enlarged in the lower panels. Scale bars are indicated  
204 on the graphs. Quantification of percentage of MBP- positive cells that are positive for SPP1 (right panels) and  
205 NEAT1 (left panels) in the parenchyma (upper panels) and white matter (lower panels) in the caudate (**h**), and  
206 accumbens (**i**). One-way ANOVA used for statistical analysis. The results are shown as boxplots with median  
207 (center line), inner quartile range (box), and min and max values as whiskers. One tailed t-test was used to  
208 determine statistical significance. The p-values are noted on the graphs. n= 4 control and 5 HD for b, and n = 3  
209 control and 4 HD for c, biologically independent samples.

## 212 **Supplementary References**

- 213
- 214
- 215 1 Belle, N. M. *et al.* TFF3 interacts with LINGO2 to regulate EGFR activation for protection against colitis  
216 and gastrointestinal helminths. *Nat. Commun.* **10**, 4408, doi:10.1038/s41467-019-12315-1 (2019).
- 217 2 Vilariño-Güell, C. *et al.* LINGO1 and LINGO2 variants are associated with essential tremor and Parkinson  
218 disease. *Neurogenetics* **11**, 401-408, doi:10.1007/s10048-010-0241-x (2010).
- 219 3 Amberger, J. S., Bocchini, C. A., Schiettecatte, F., Scott, A. F. & Hamosh, A. OMIM.org: Online Mendelian  
220 Inheritance in Man (OMIM(R)), an online catalog of human genes and genetic disorders. *Nucleic Acids*  
221 *Res* **43**, D789-798, doi:10.1093/nar/gku1205 (2015).
- 222 4 Ishii, T. *et al.* Modeling of the Bipolar Disorder and Schizophrenia Using Patient-Derived Induced  
223 Pluripotent Stem Cells with Copy Number Variations of 5 and. *eNeuro* **6**, doi:10.1523/ENEURO.0403-  
224 18.2019 (2019).
- 225 5 Kitano, J. *et al.* Tamalin is a scaffold protein that interacts with multiple neuronal proteins in distinct modes  
226 of protein-protein association. *J. Biol. Chem.* **278**, 14762-14768, doi:10.1074/jbc.M300184200 (2003).
- 227 6 Li, J. *et al.* Grp1 plays a key role in linking insulin signaling to glut4 recycling. *Dev. Cell* **22**, 1286-1298,  
228 doi:10.1016/j.devcel.2012.03.004 (2012).
- 229 7 Jakel, S. *et al.* Altered human oligodendrocyte heterogeneity in multiple sclerosis. *Nature* **566**, 543-547,  
230 doi:10.1038/s41586-019-0903-2 (2019).
- 231 8 Cammer, W. & Zhang, H. Carbonic anhydrase in distinct precursors of astrocytes and oligodendrocytes  
232 in the forebrains of neonatal and young rats. *Brain Res Dev Brain Res* **67**, 257-263, doi:10.1016/0165-  
233 3806(92)90226-m (1992).
- 234



# Supplementary Figure 1

**a**

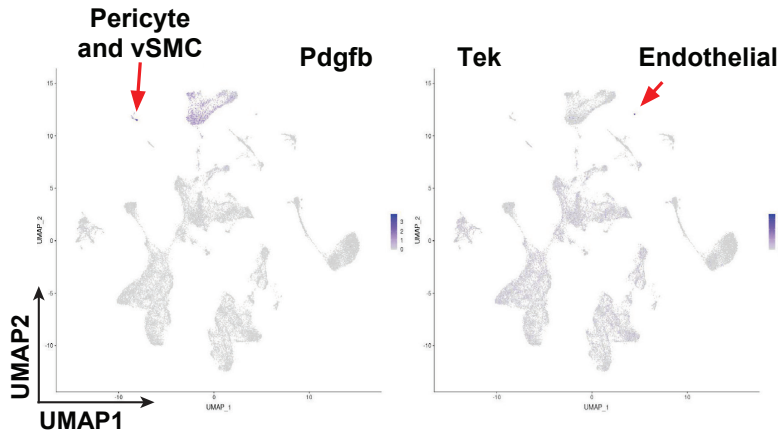

**b**

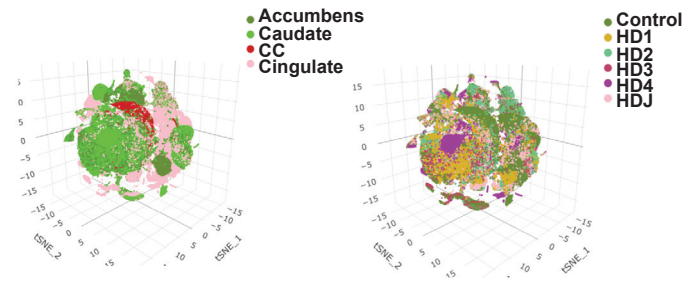

**c**

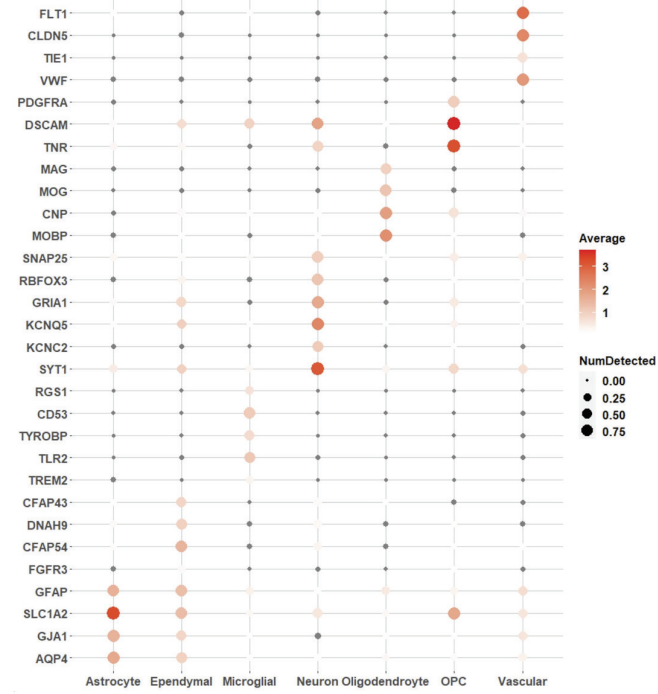

**d**

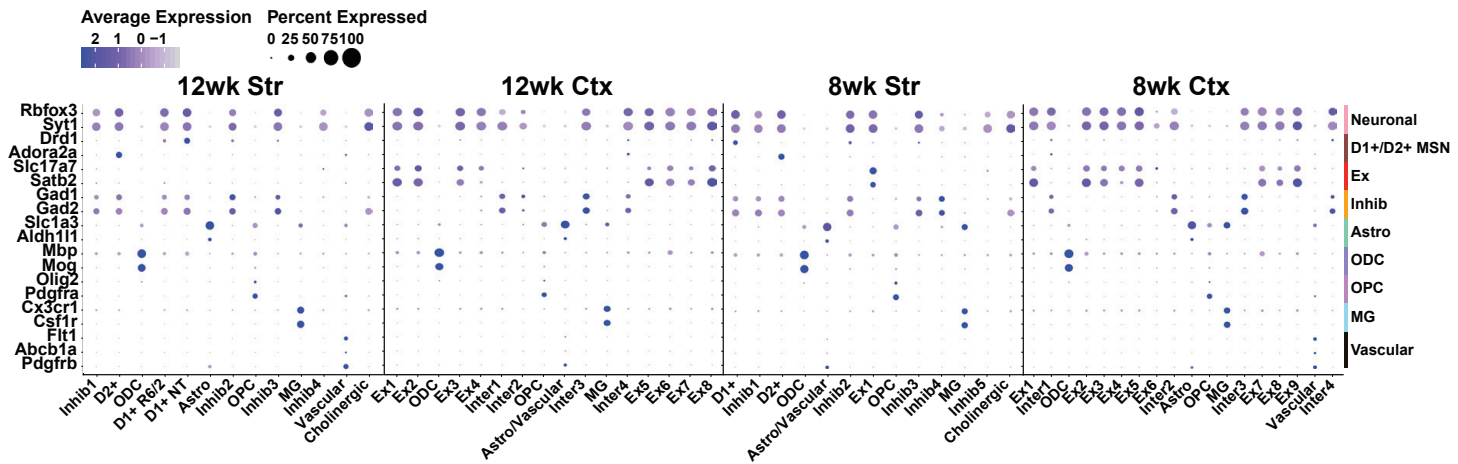

**e**

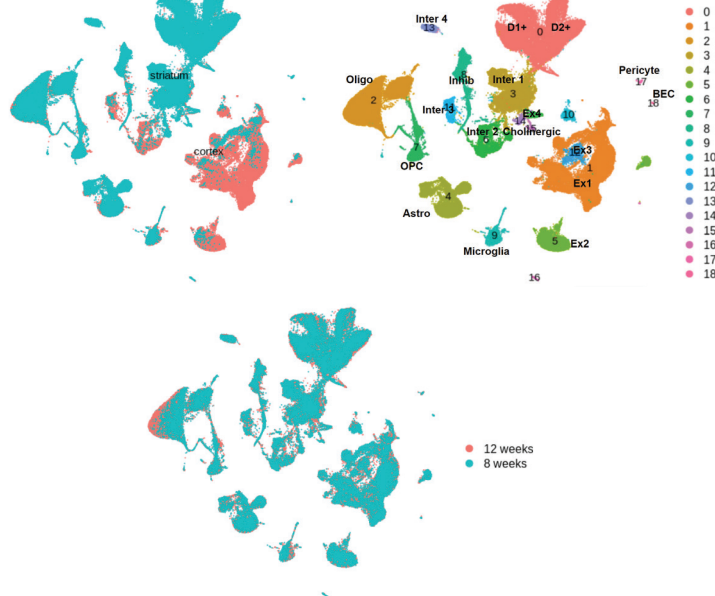

# Supplementary Figure 2

**a**

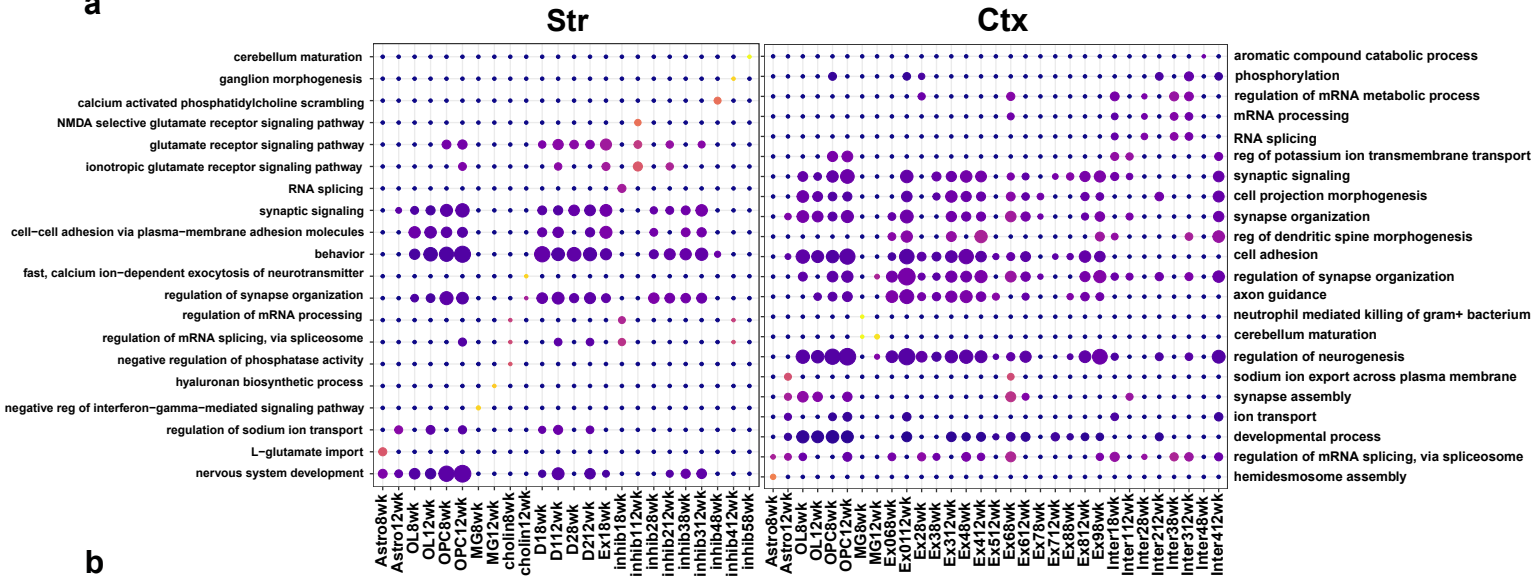

**b**

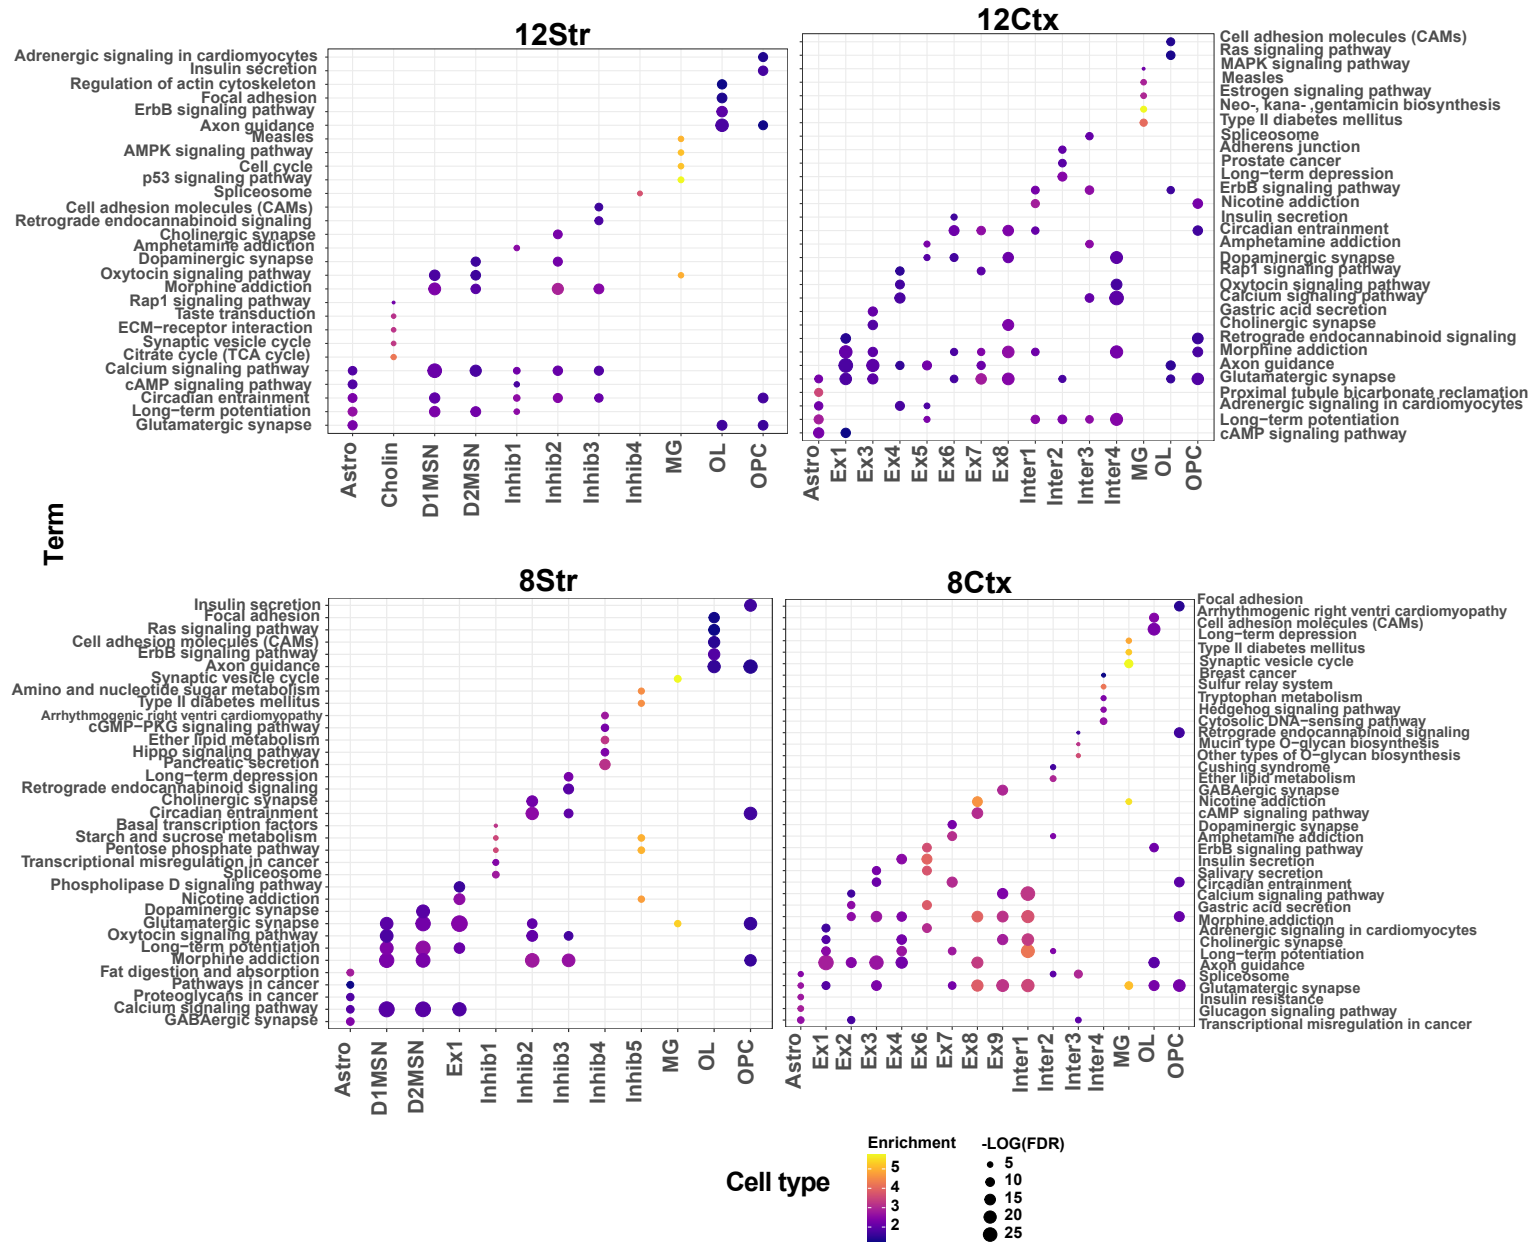

# Supplementary Figure 3

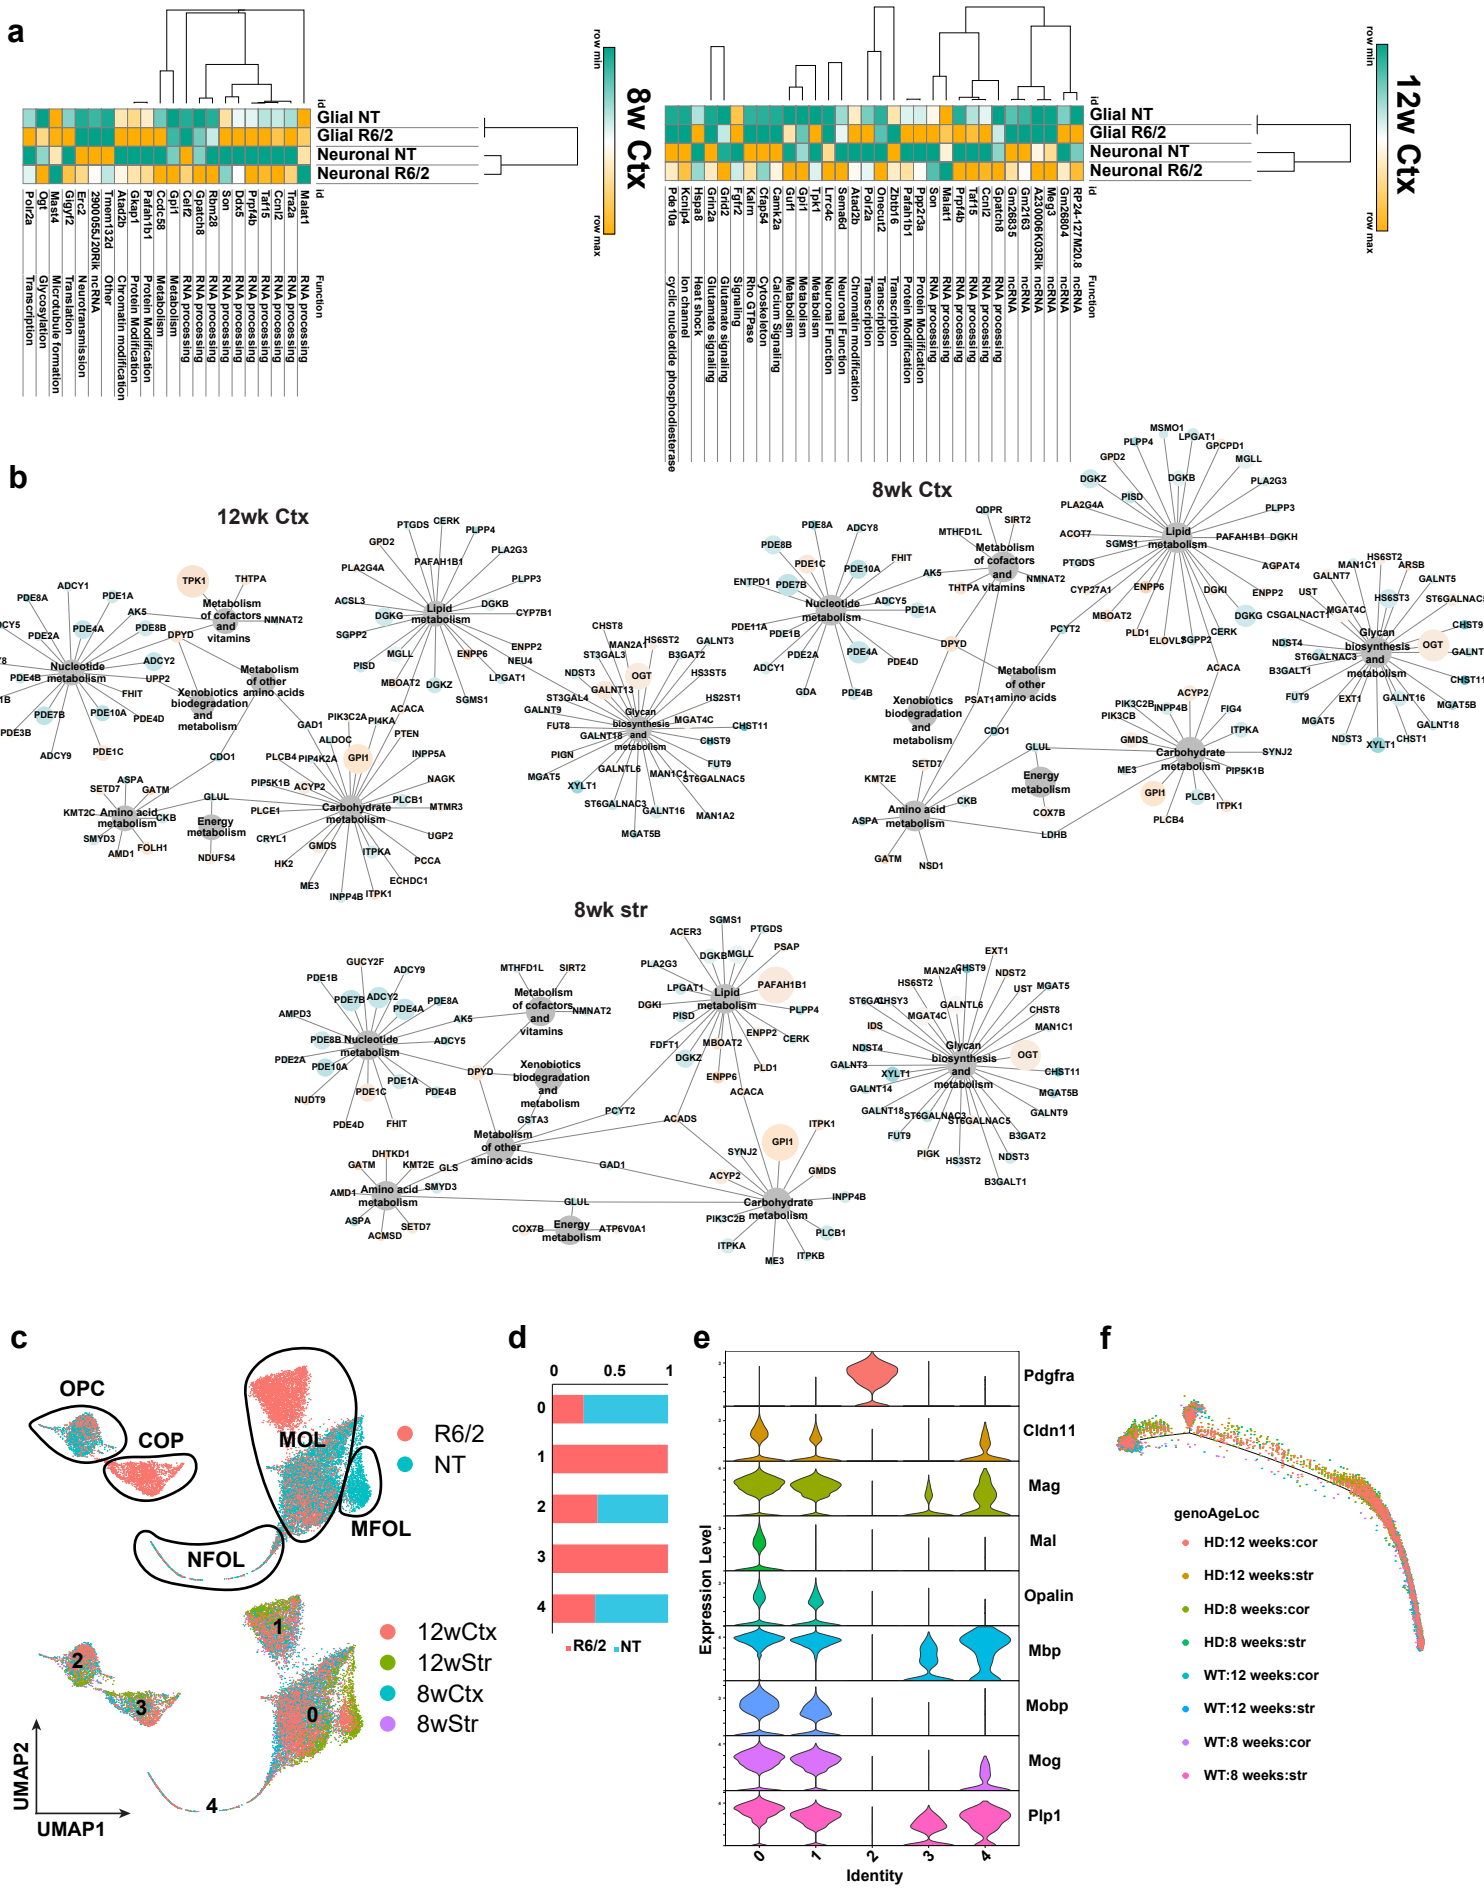

# Supplementary Figure 4

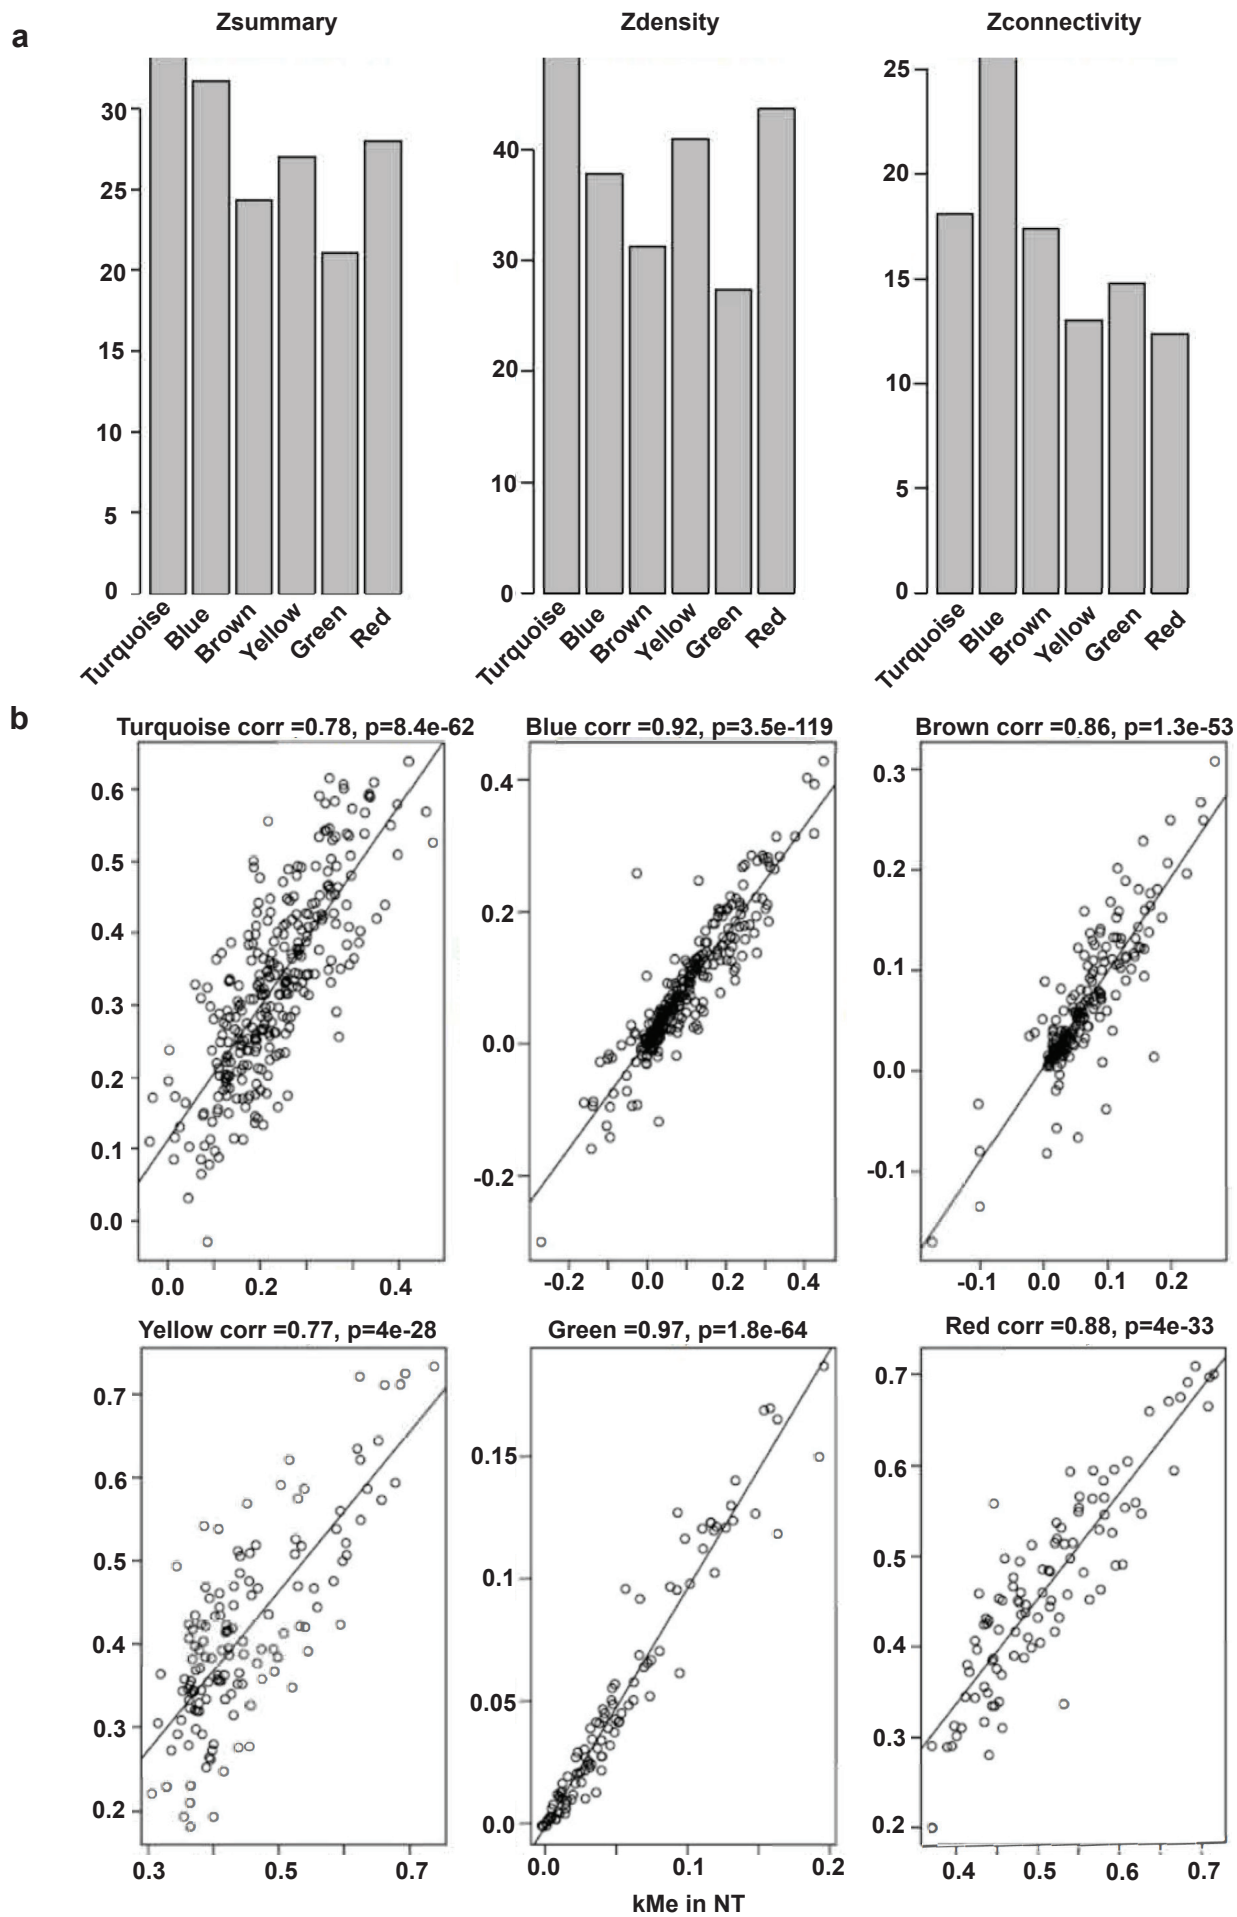



# Supplementary Figure 5

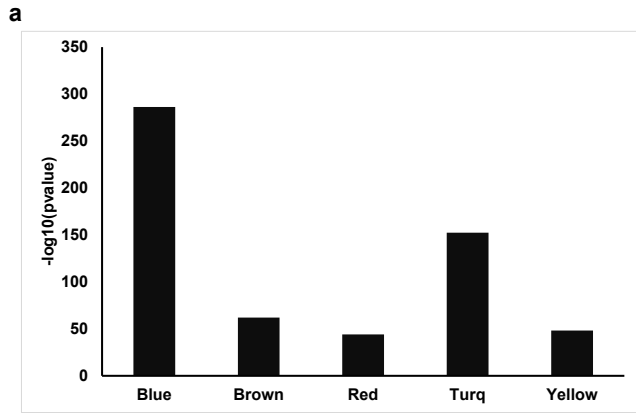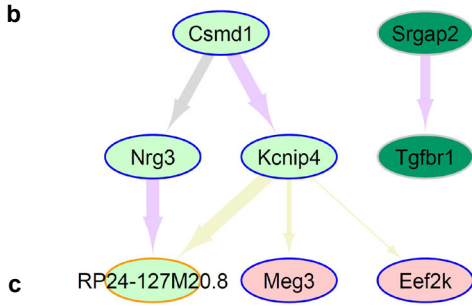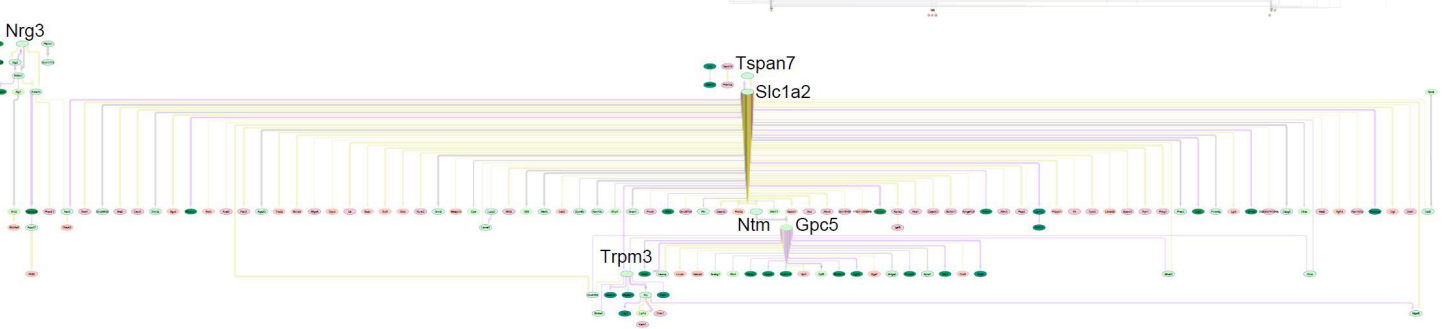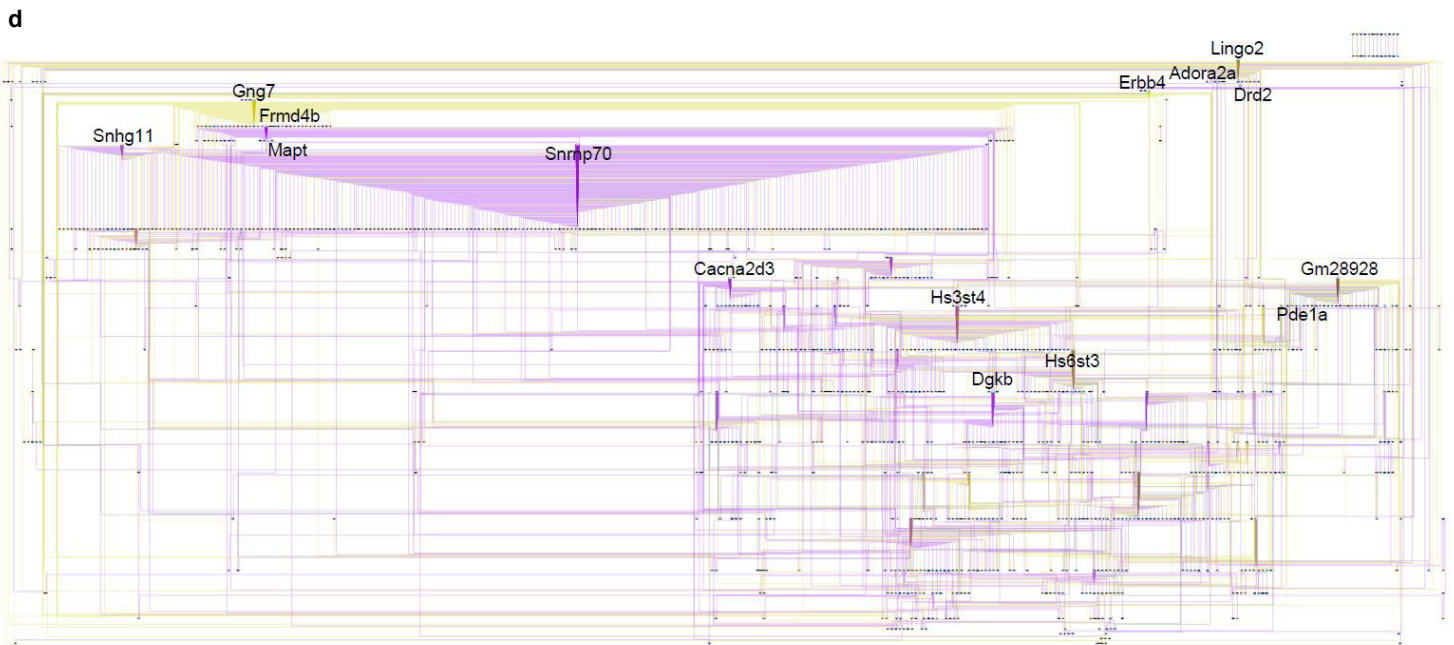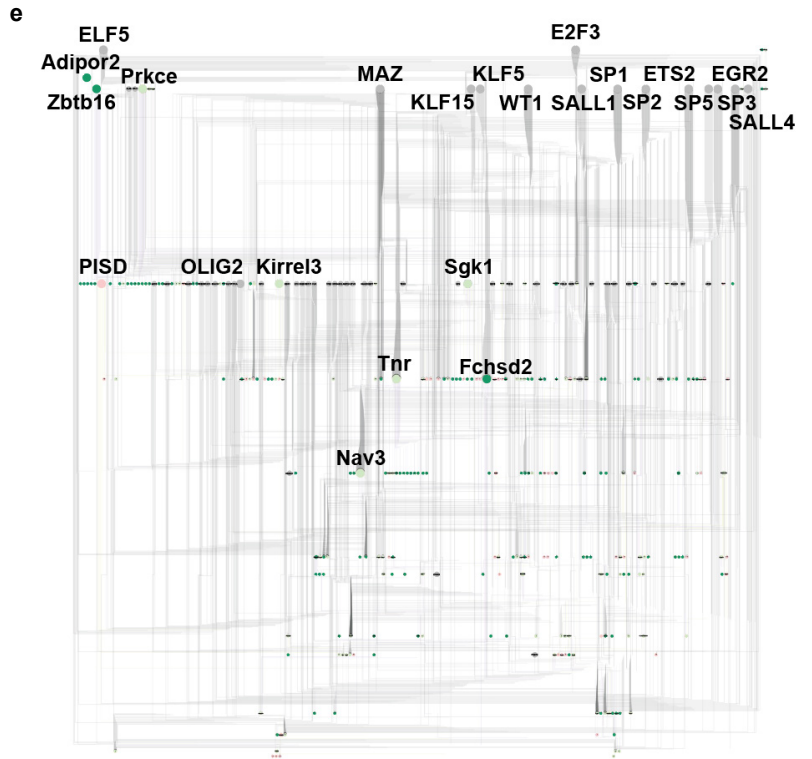

# Supplementary Figure 6

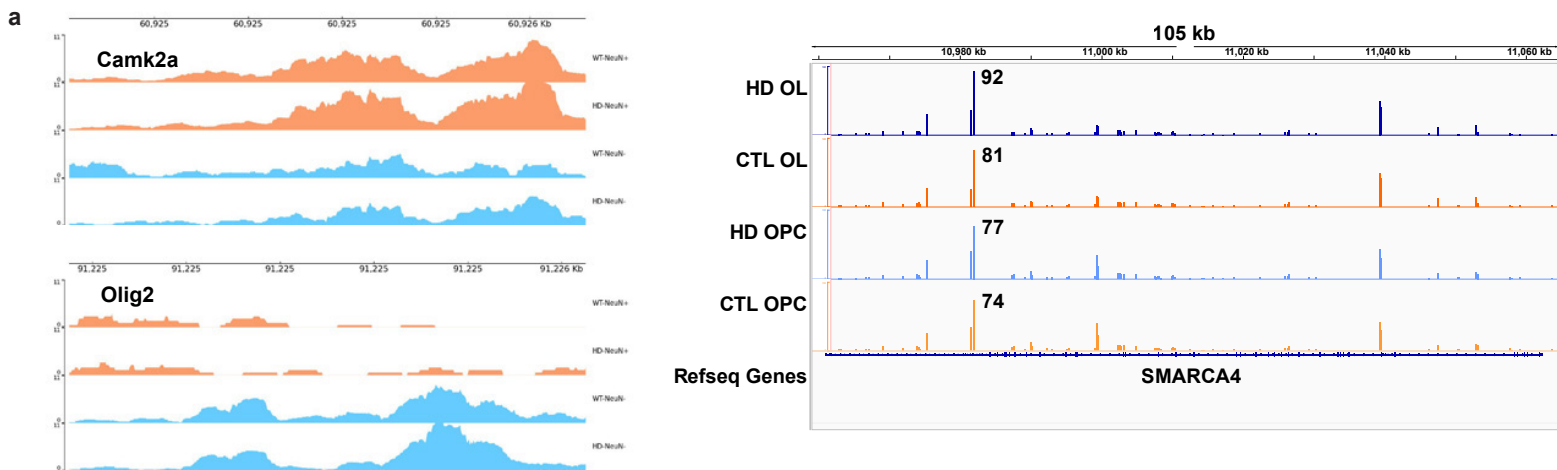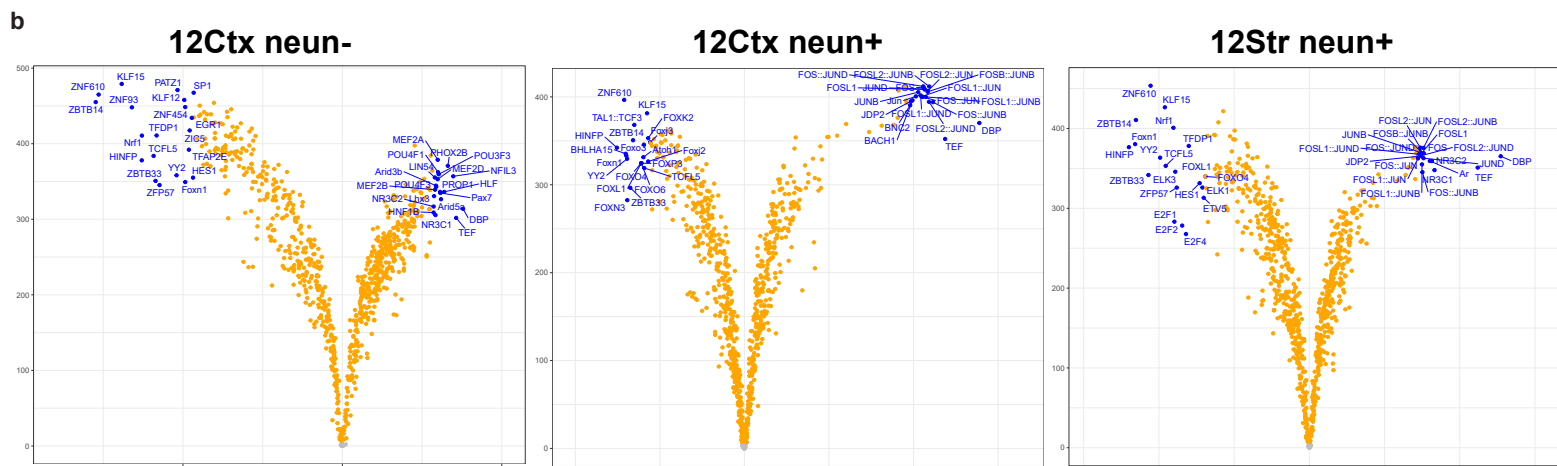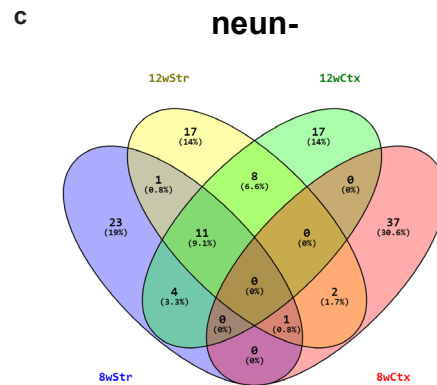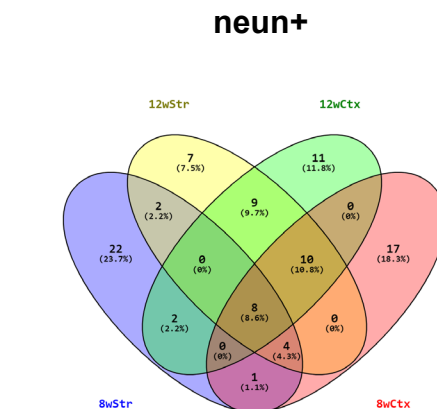

Differential Binding score

# Supplementary Figure 7

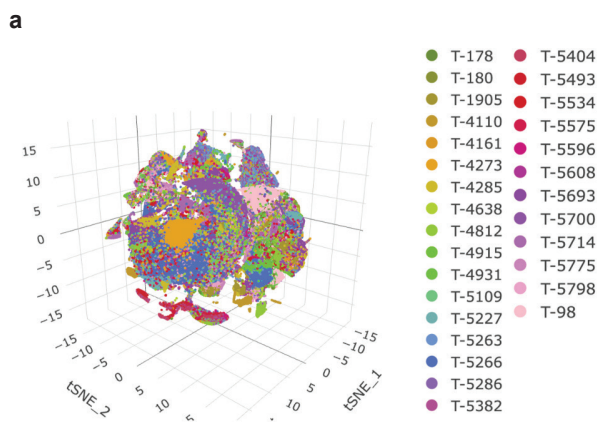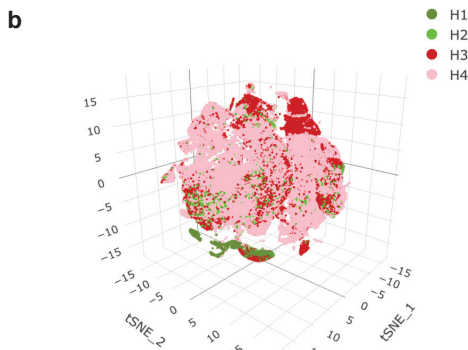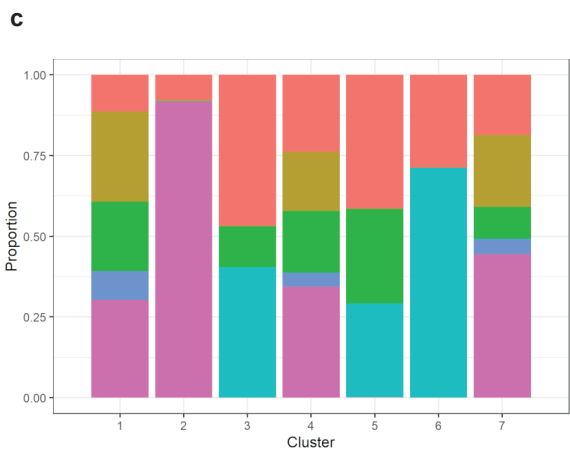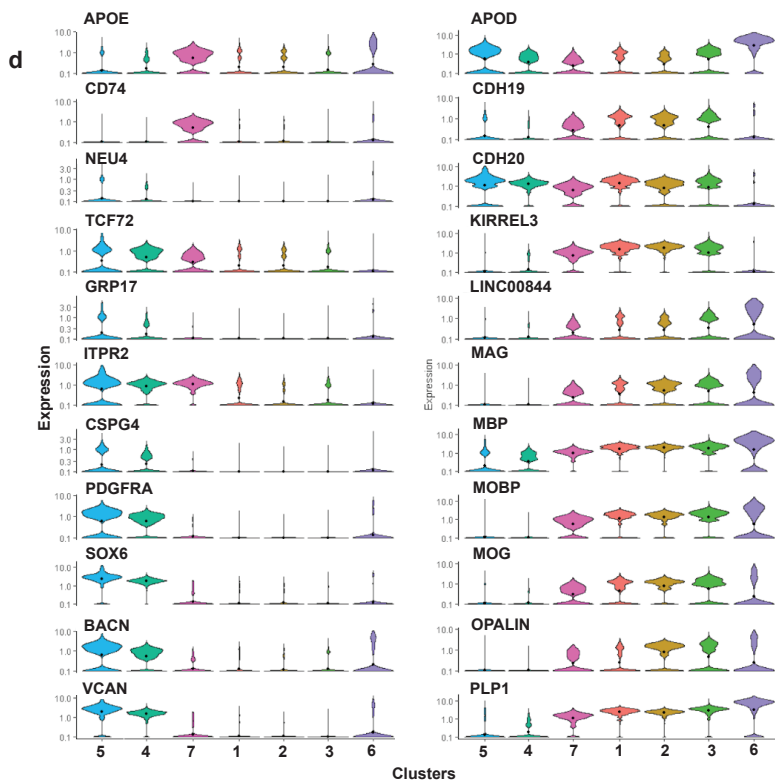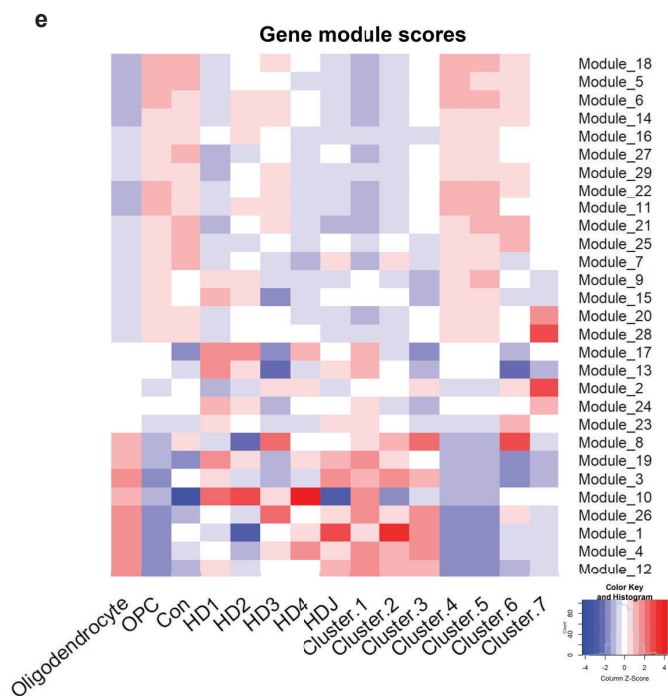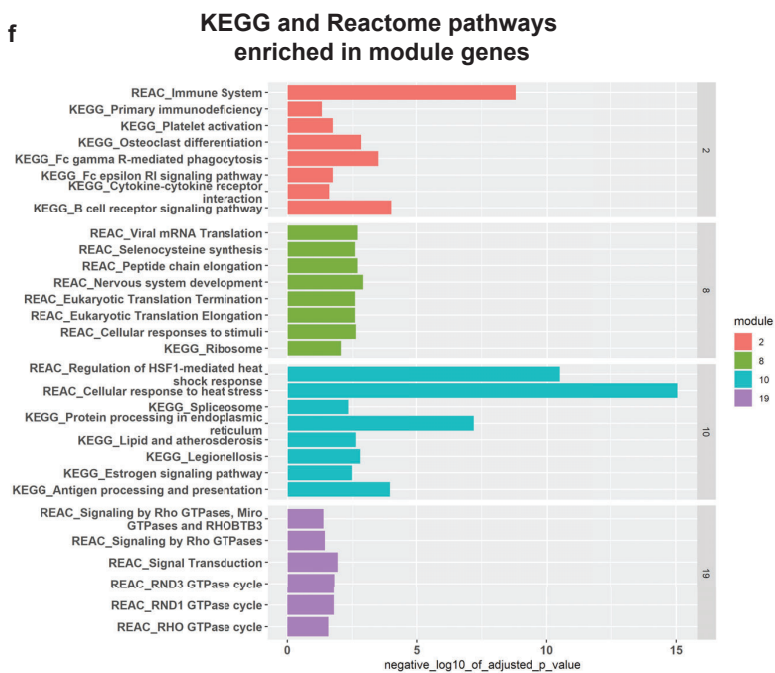

# Supplementary Figure 8

a

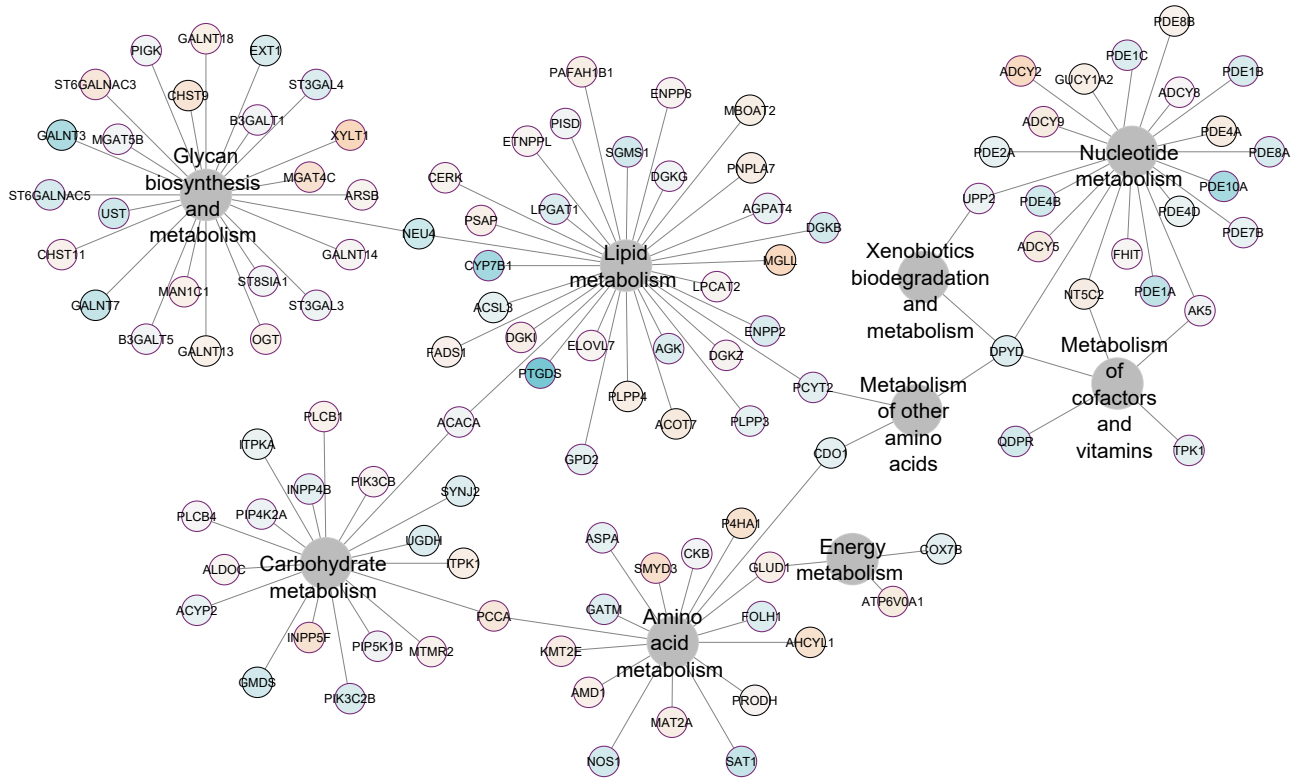

b

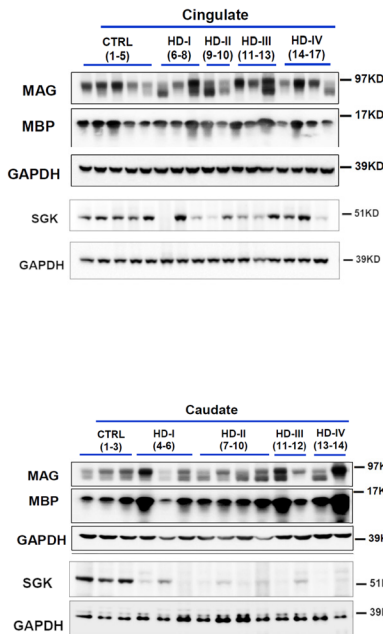

c

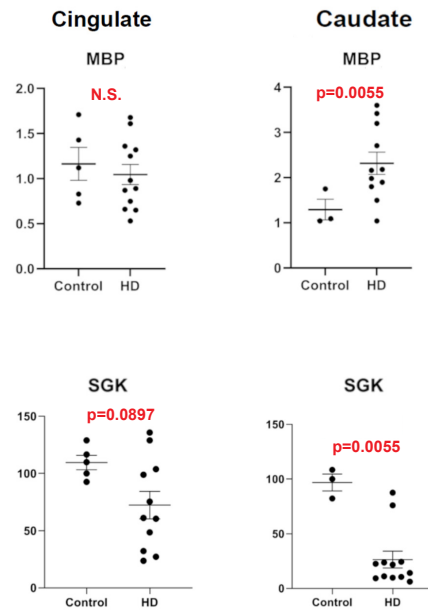

d

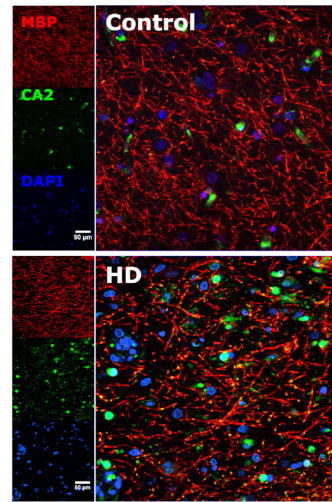

e

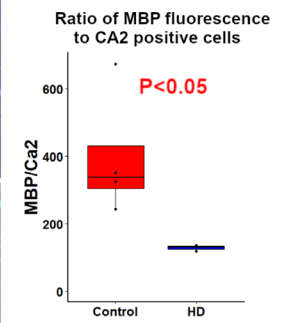



# Supplementary Figure 9

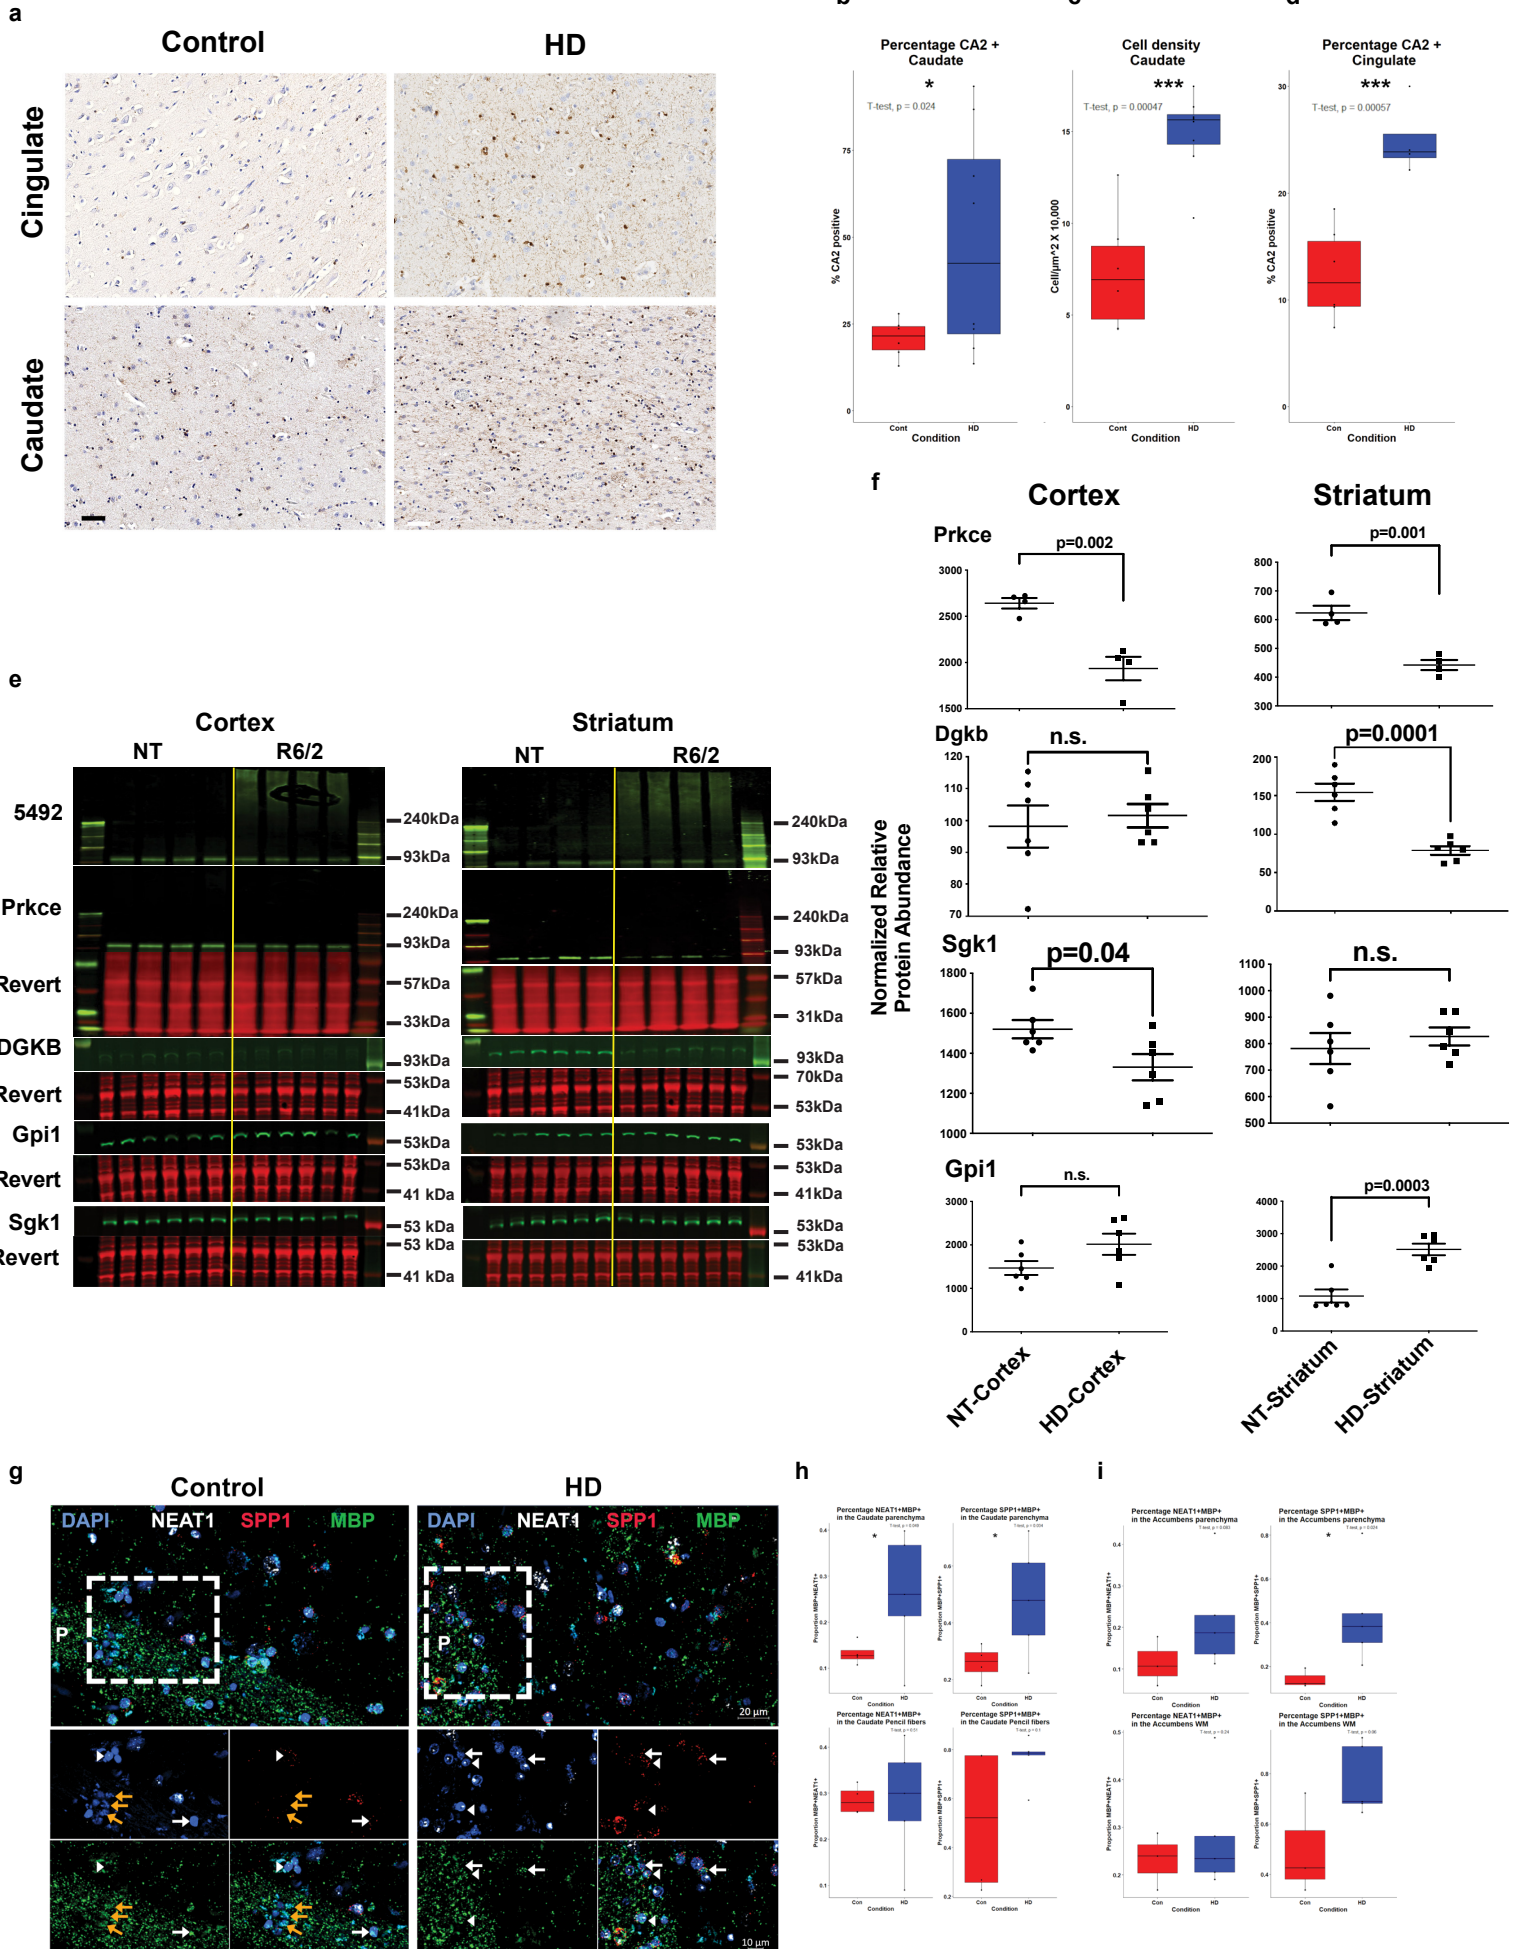

Supplement: 41467_2022_35388_MOESM1_ESM.pdf [file 41467_2022_35388_MOESM1_ESM.pdf]
