# Supplementary material for: Huntington disease oligodendrocyte maturation deficits revealed by single-nucleus RNAseq are rescued by thiamine-biotin supplementation
Source: Springer Nature journal article supplement (doi:10.1038/s41467-022-35388-x), 2022-12-21

Figure 7B - PKCε – GAPDH, p-PKCε – GAPDH (Caudate)

0215-3 p-PKCε - GAPDH

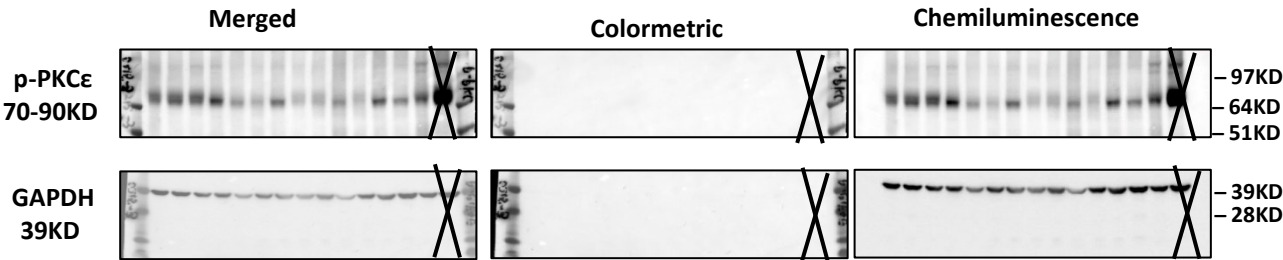

0105-3 PKCε / GAPDH

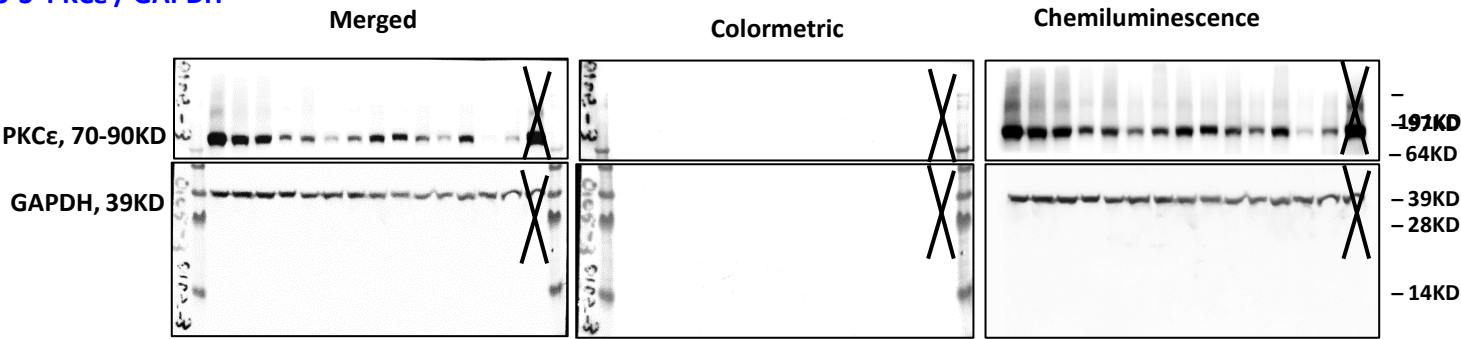

“X” indicates samples that are of a different condition not related to the study

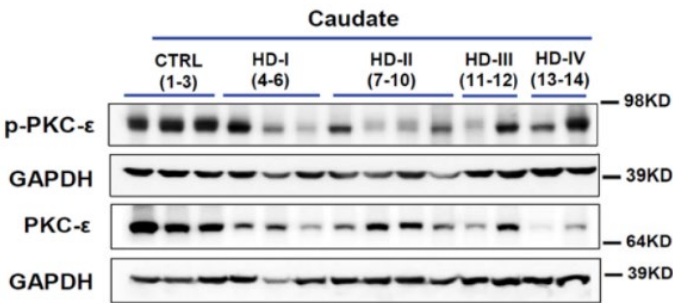

Figure 7B - PKCe – GAPDH, p-PKCe – GAPDH (Cingulate)

0210-2 p-PKCe / GAPDH

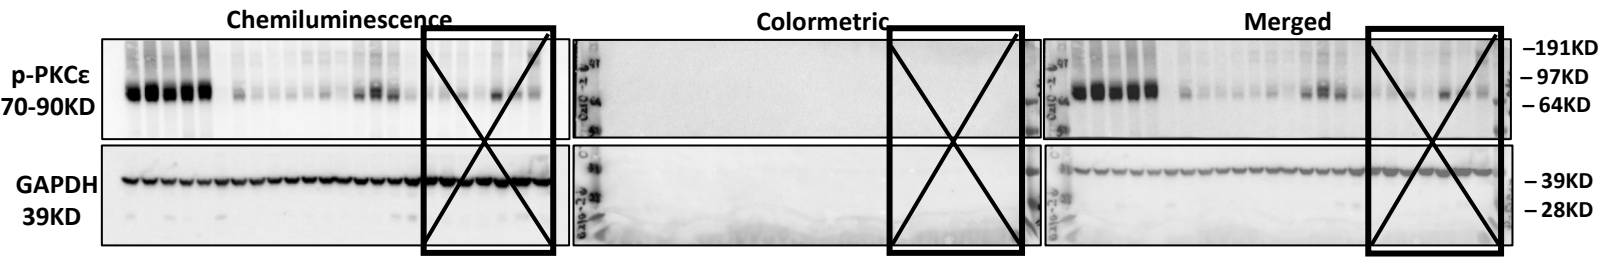

0210-3 PKCe / GAPDH (membrane blotted with AKT (~50KD, mouse) first, then stripped, blotted for PKCe (>60KD, rabbit))

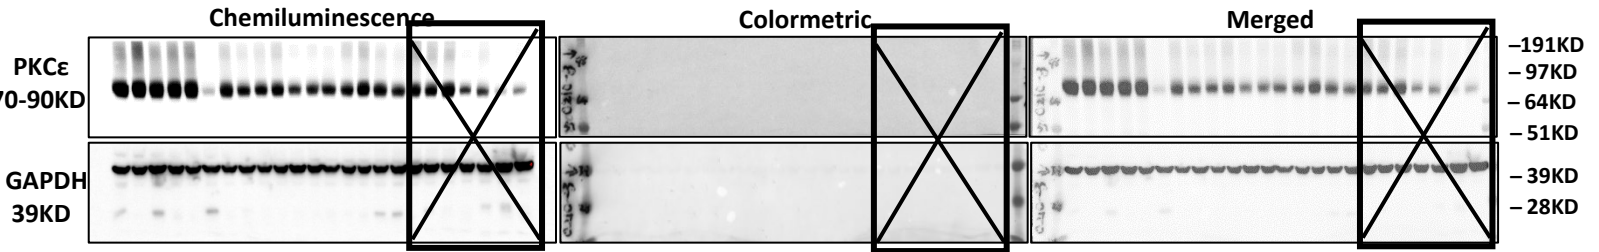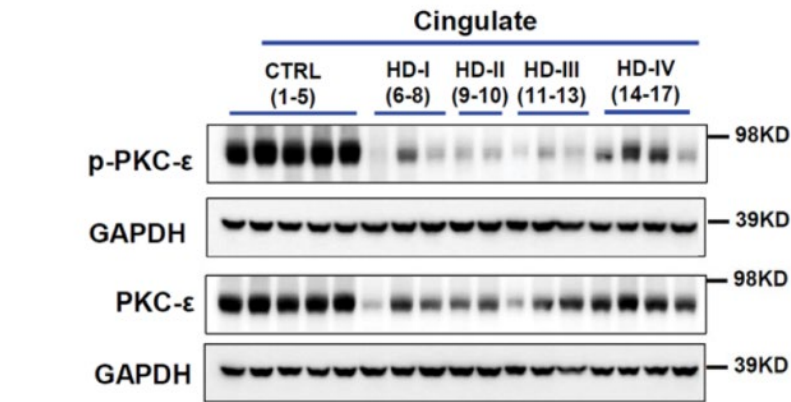

“X” indicates samples that are of a different condition not related to the study

Figure 7d - Prkce – Revert, p-Prkce – Revert (cortex)

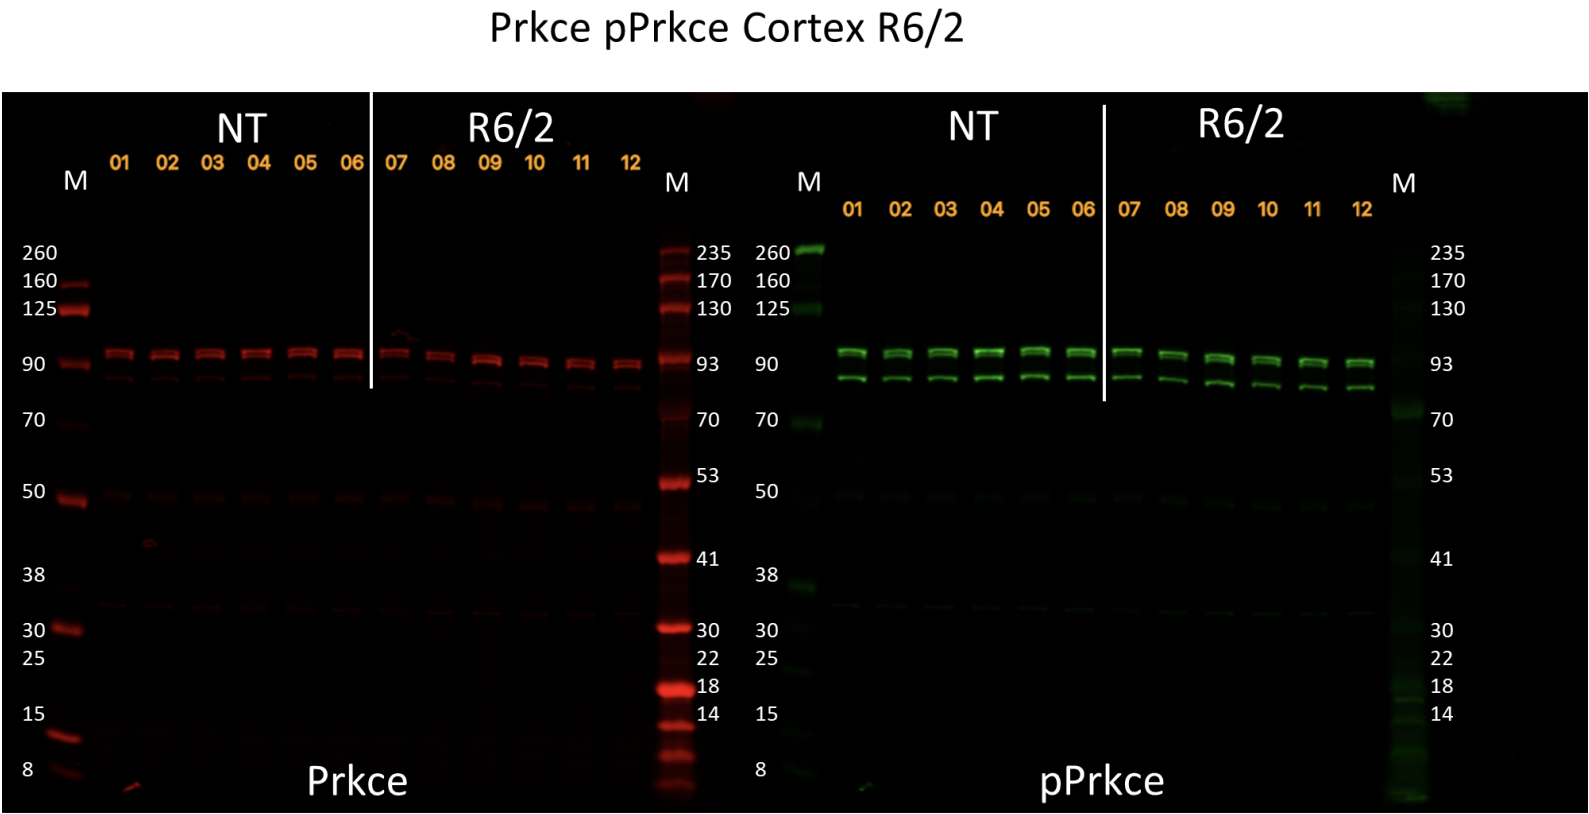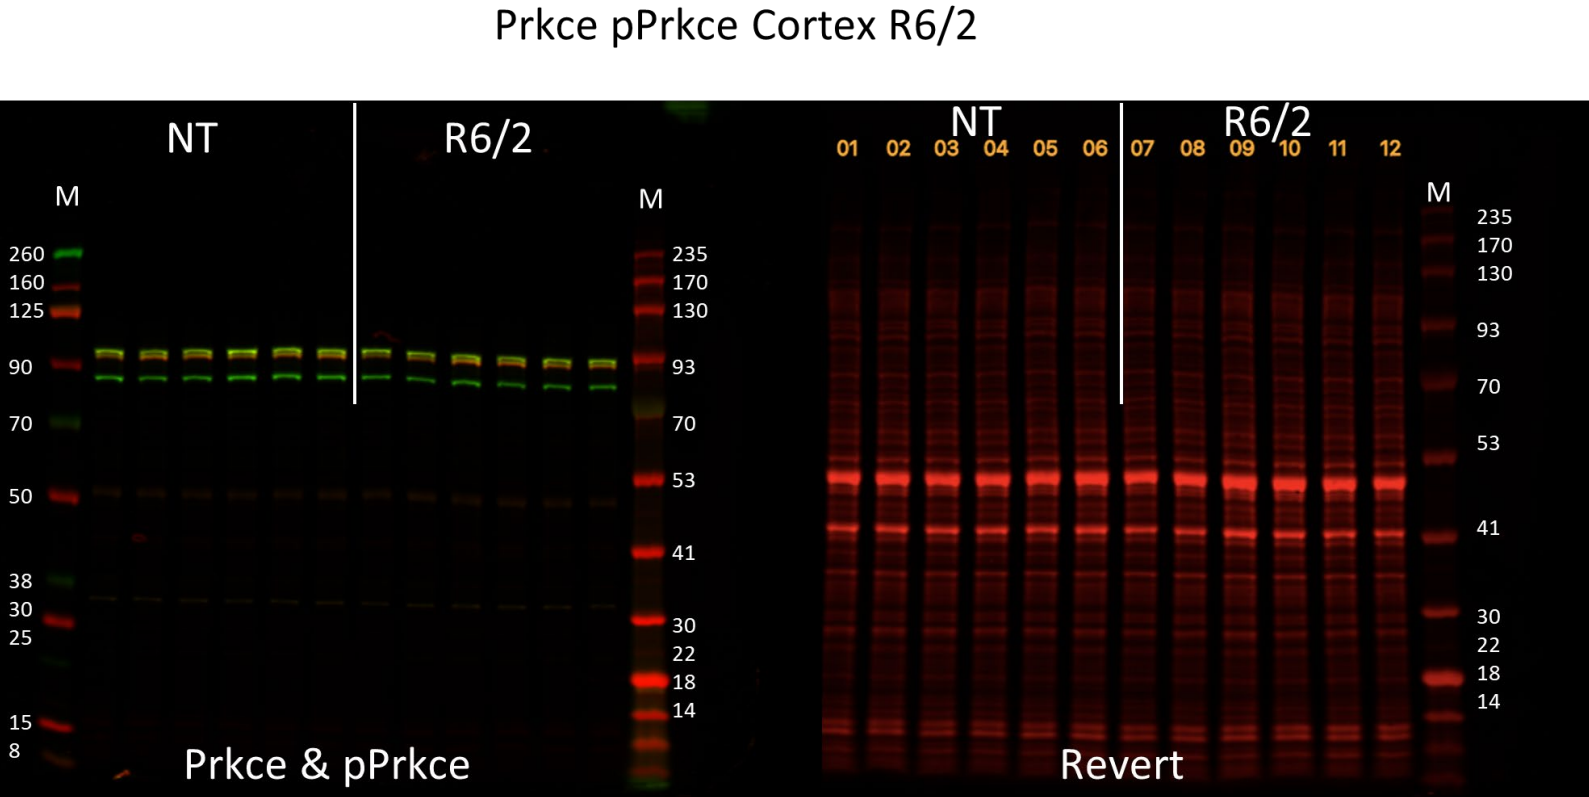

Figure 7d - Prkce – Revert, p-Prkce – Revert (striatum)

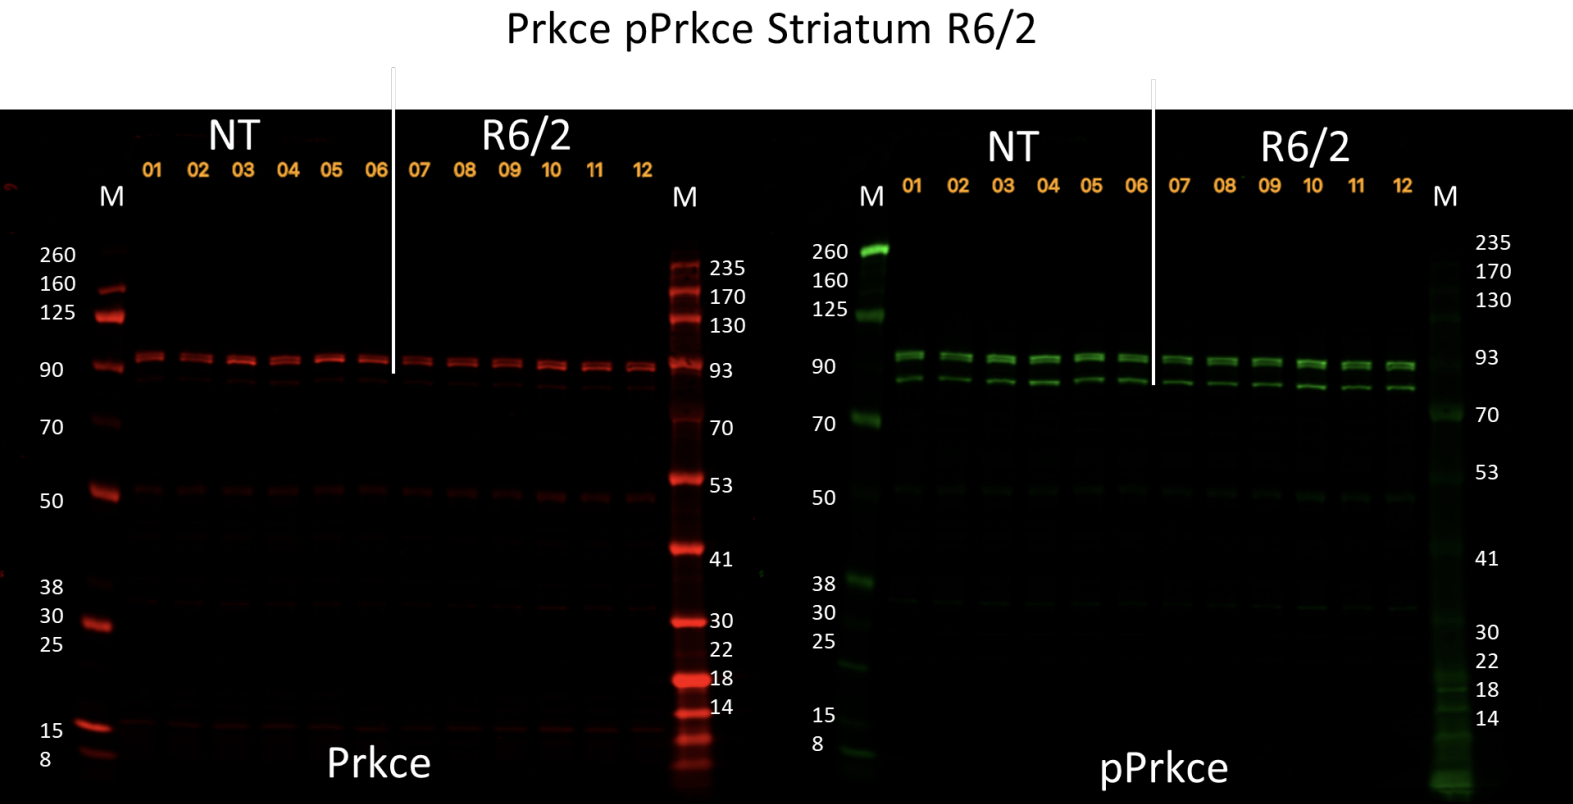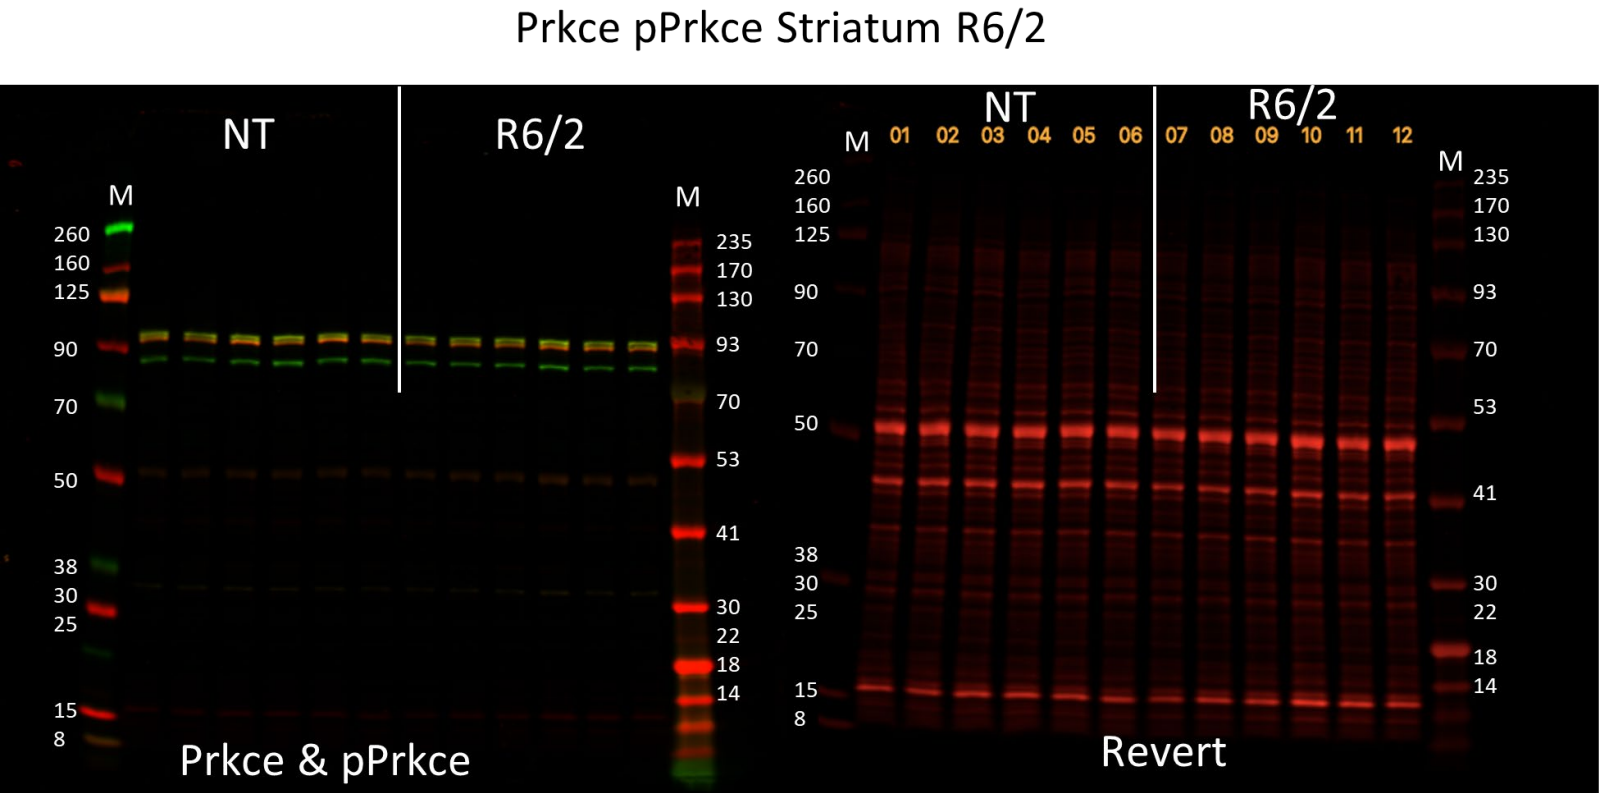

Figure 7d – Tpk1 – Revert, (cortex & striatum)

TPK1 Cortex R6/2

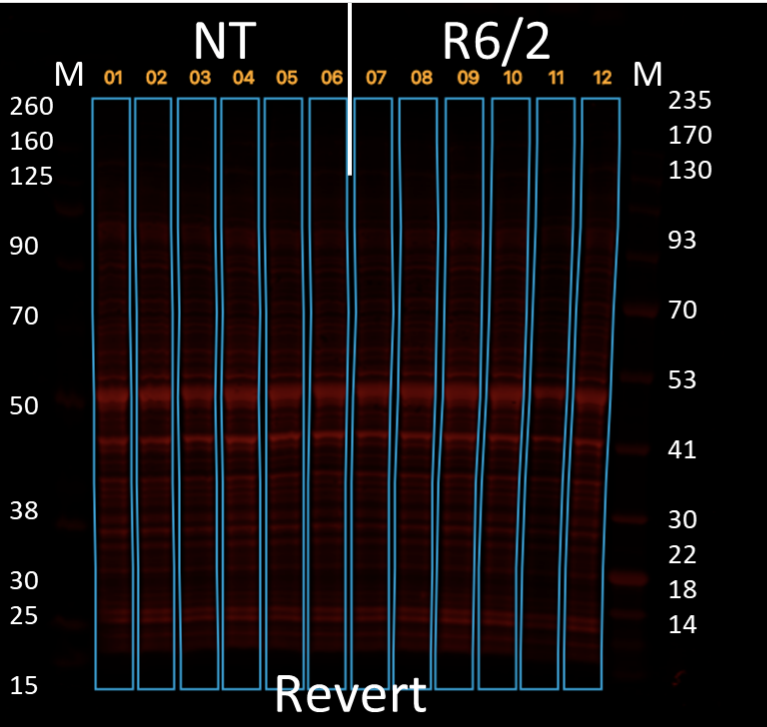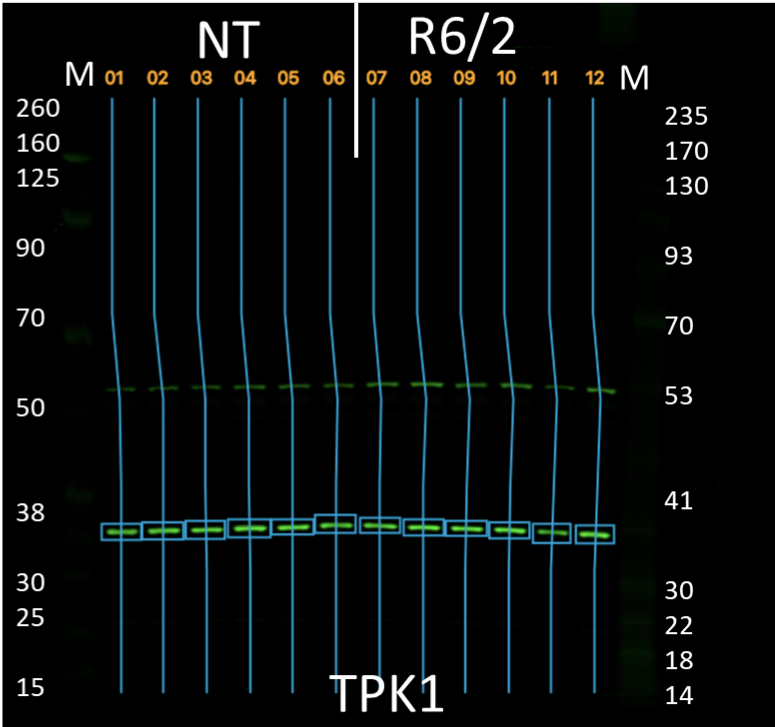

TPK1 Striatum R6/2

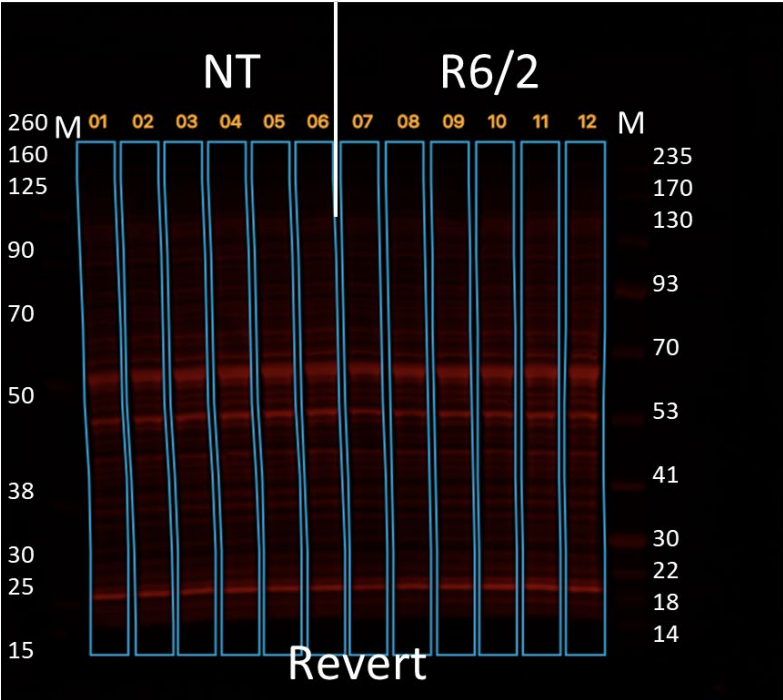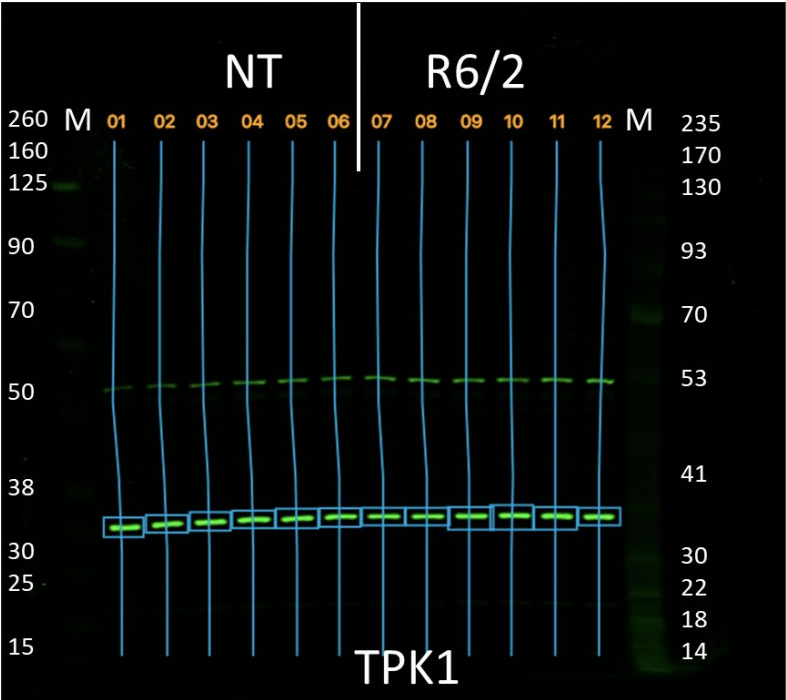



Figure 7f – Tpk1 – Revert, (human)

TPK1 human

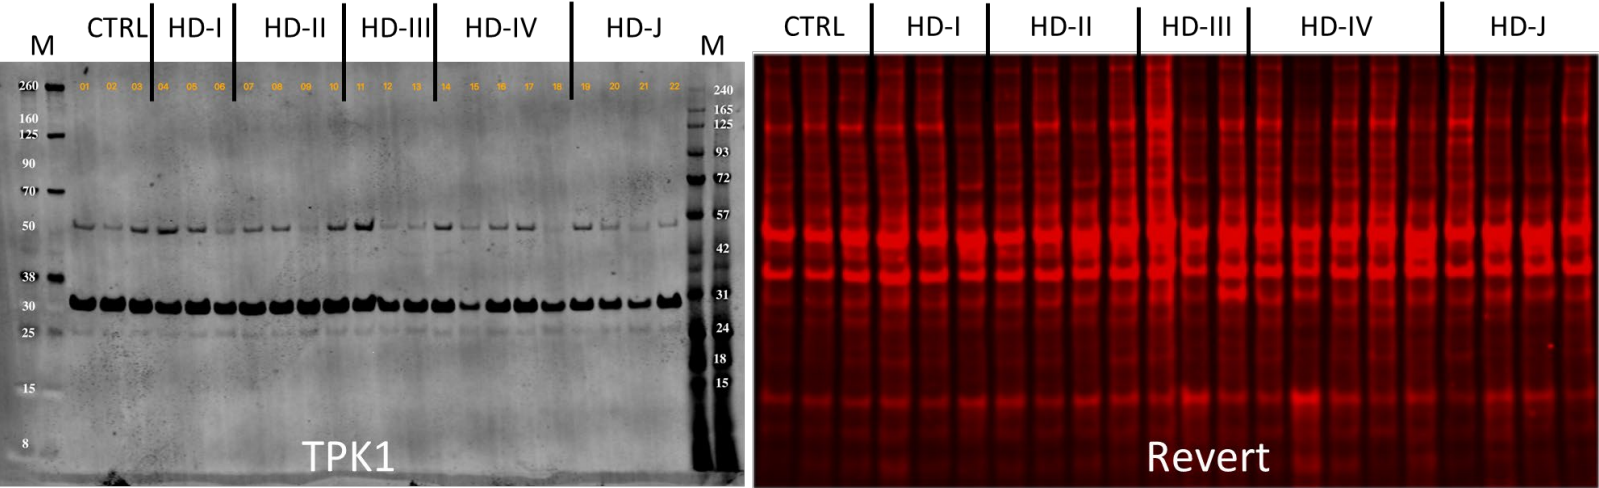

Figure 7i – in vitro WB –A-TUBULIN

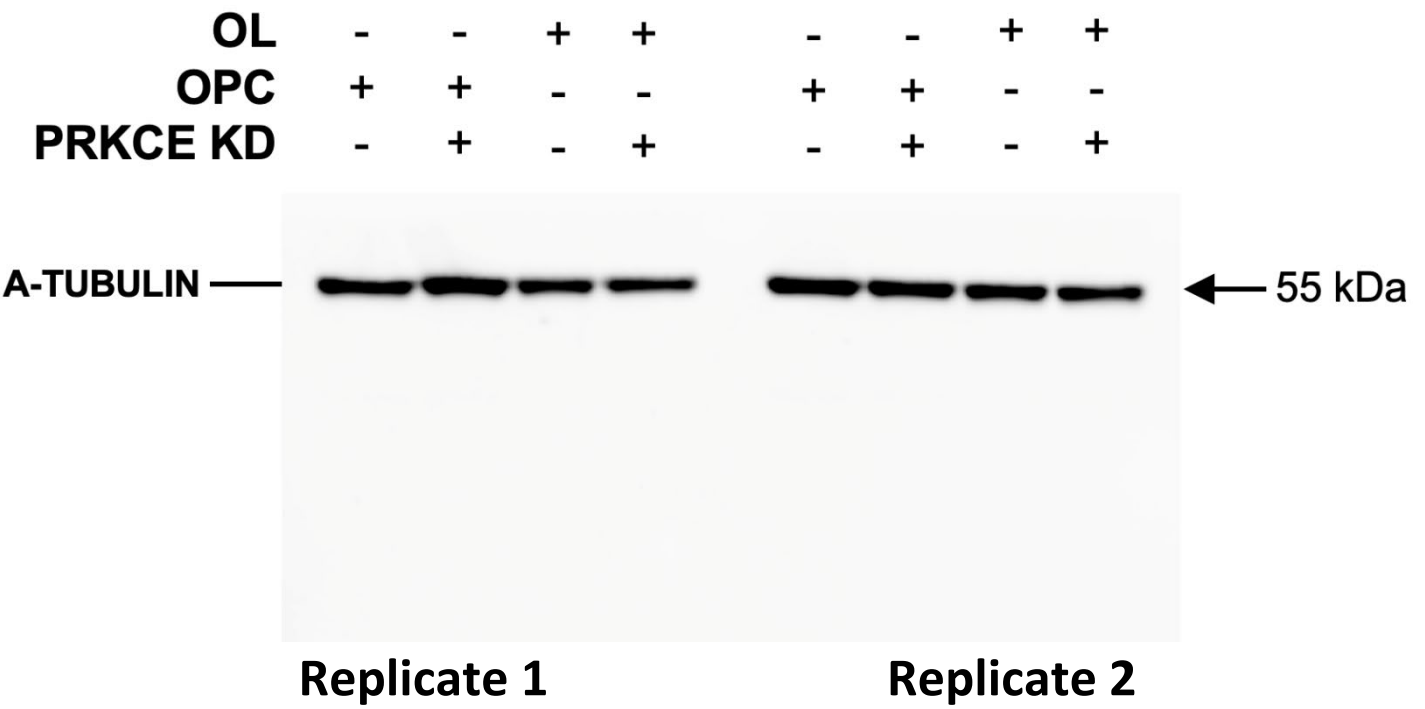

### Figure 7i – in vitro WB CNPase

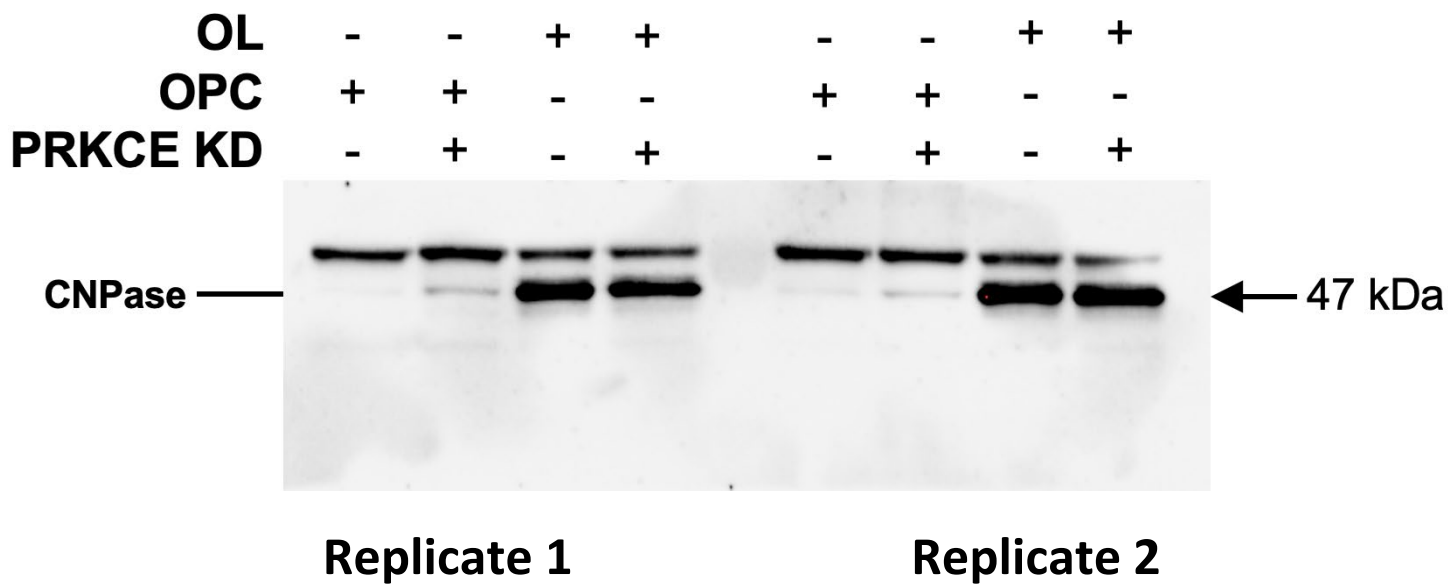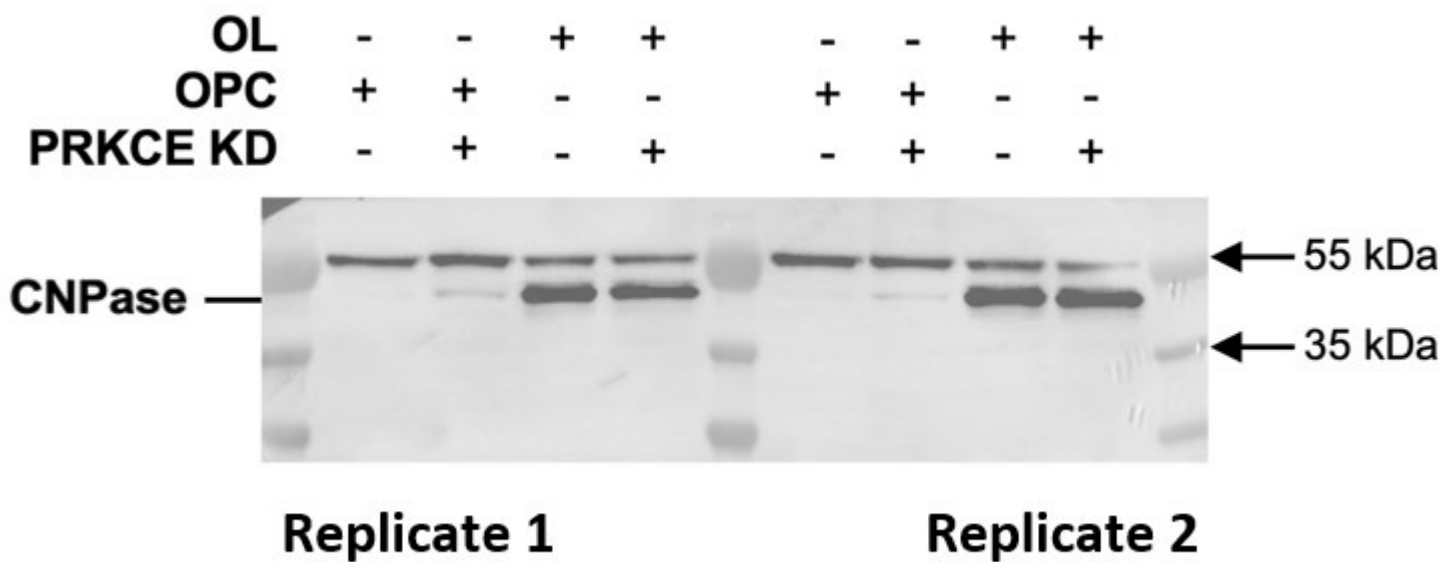



Figure 7i – in vitro WB MOG

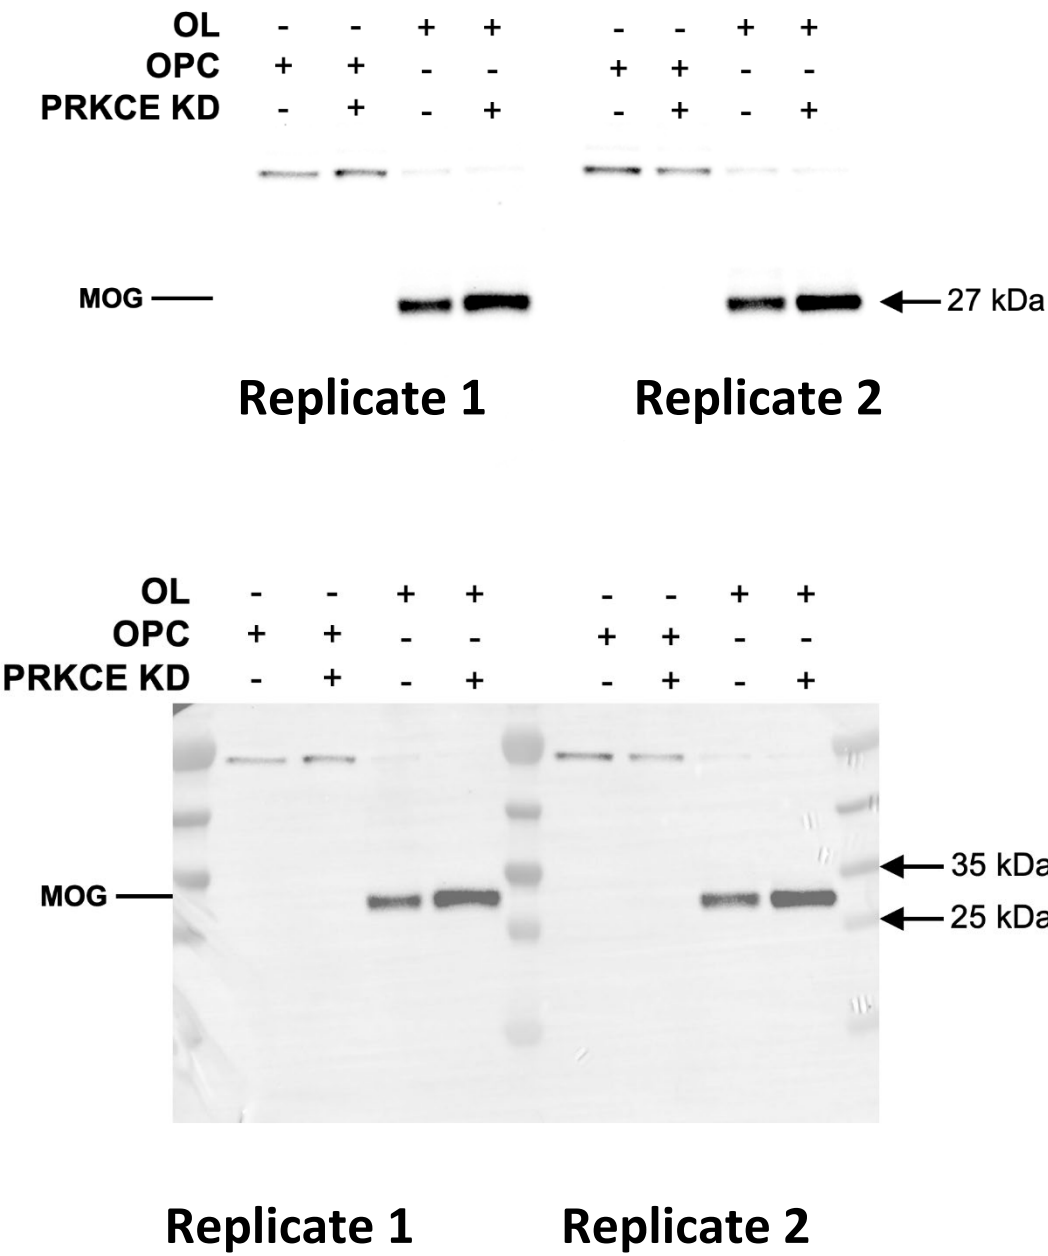

Figure 7i – in vitro WB OLIG2

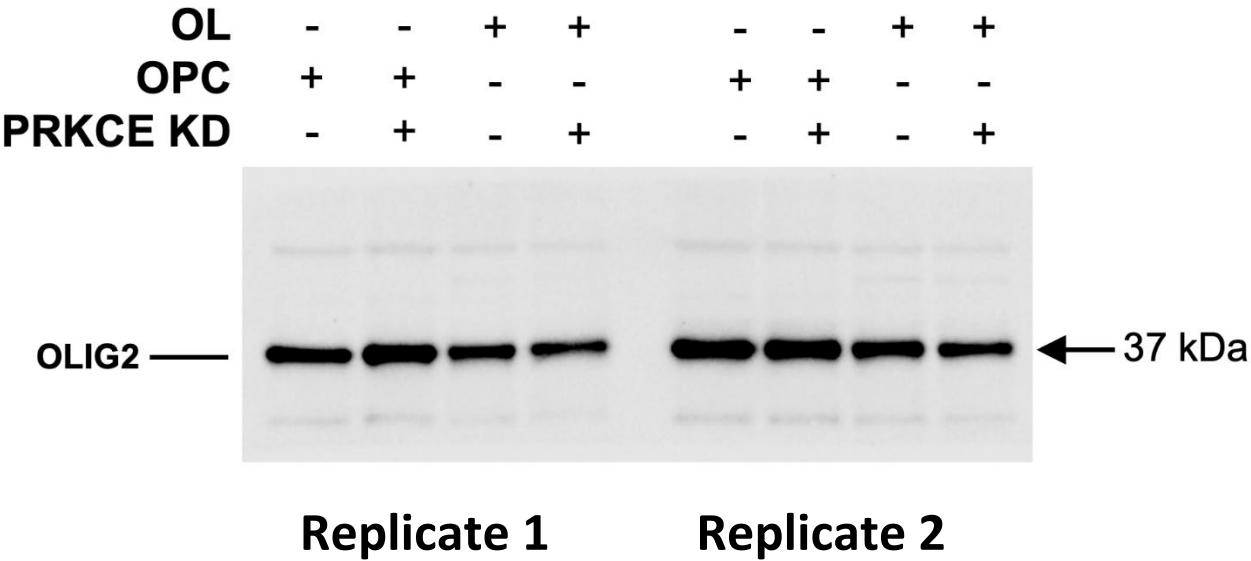

Figure 7i – in vitro WB PRKCE

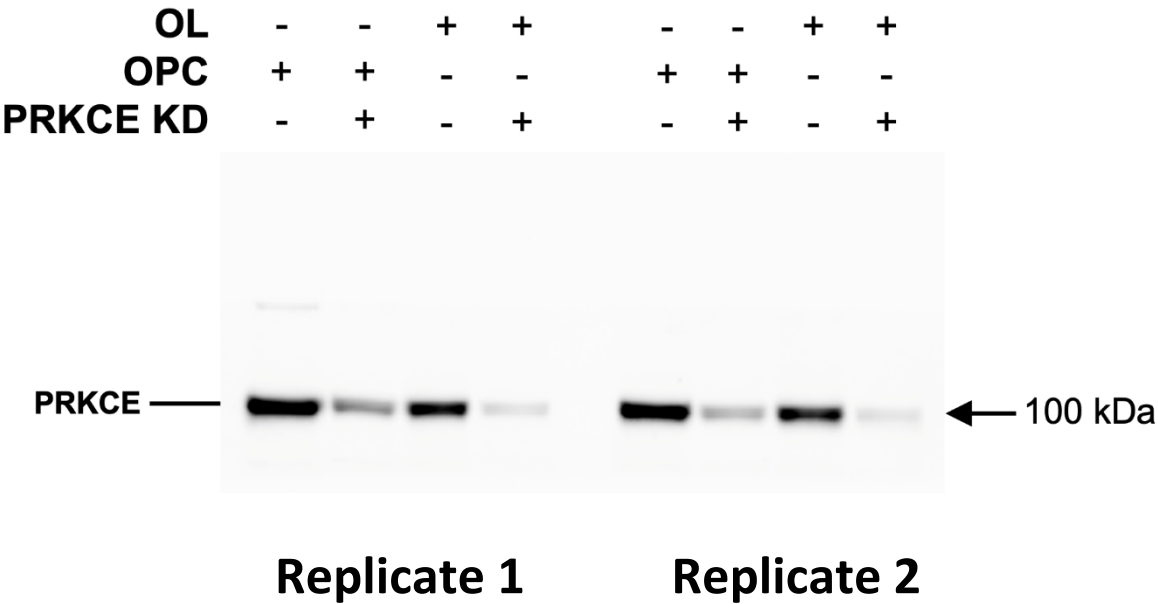

Figure 7i – in vitro WB A-TUBULIN

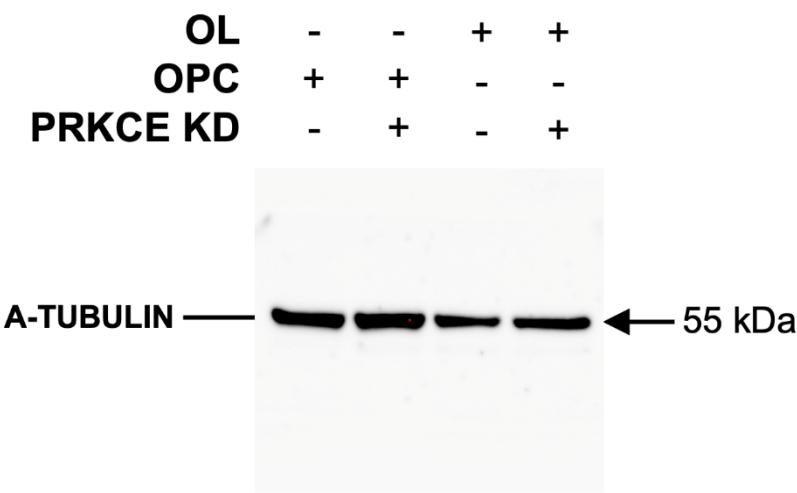

Replicate 3

Figure 7i – in vitro WB B-ACTIN

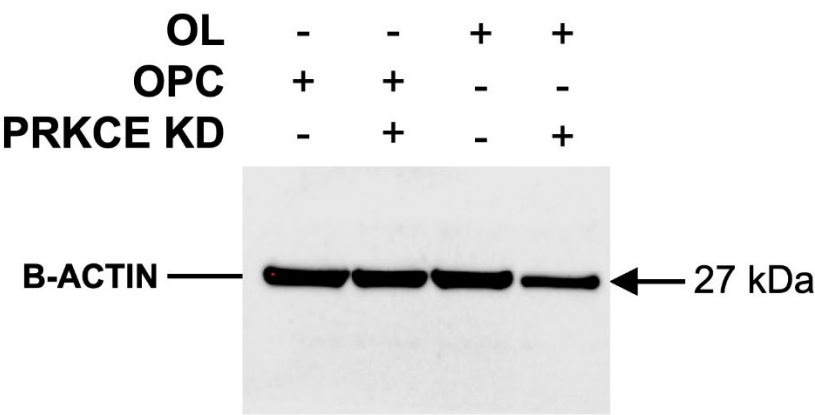

Replicate 3

Figure 7i – in vitro WB PRKCE

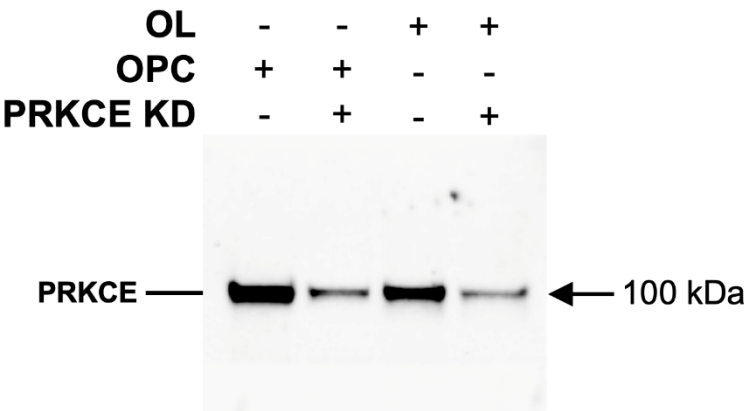

Replicate 3



Figure 7i – in vitro WB MOG

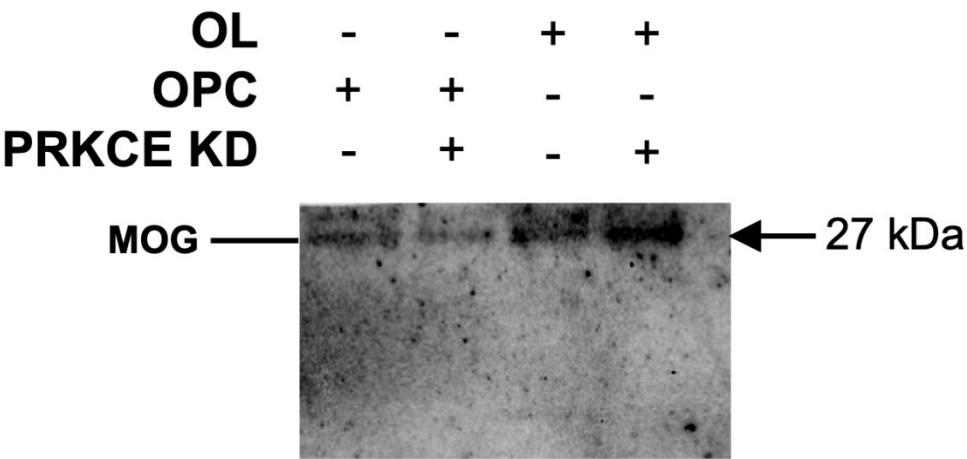

Replicate 3

Original

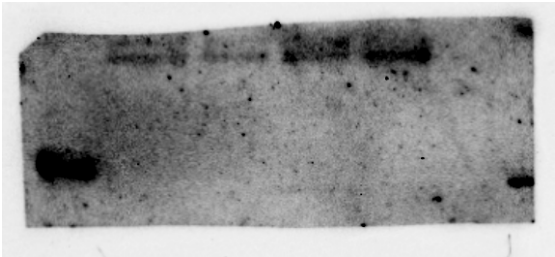

Figure S8B - 0215-1 MAG – GAPDH - MBP

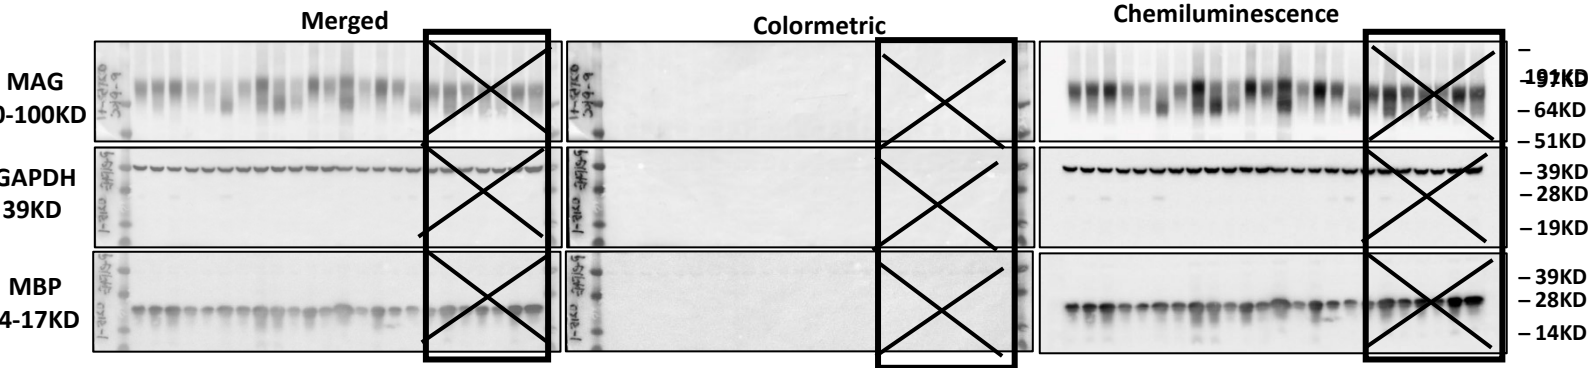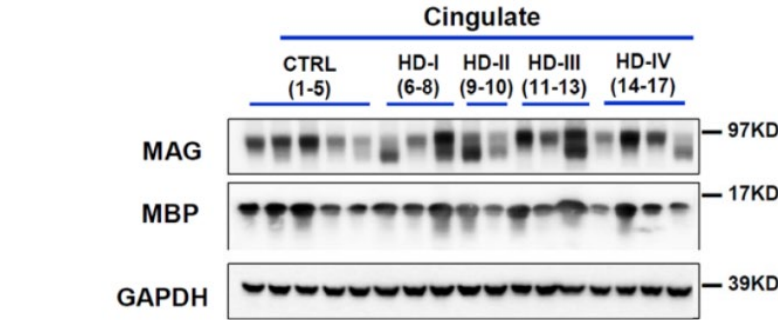

0215-3 p-PKCε - GAPDH - MBP

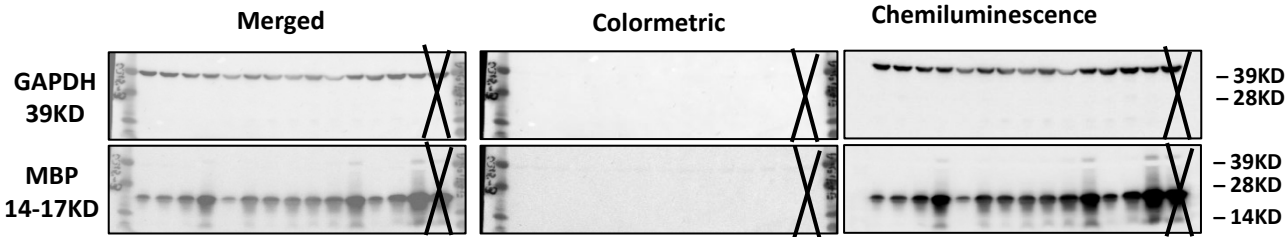

0215-4 MAG – GAPDH

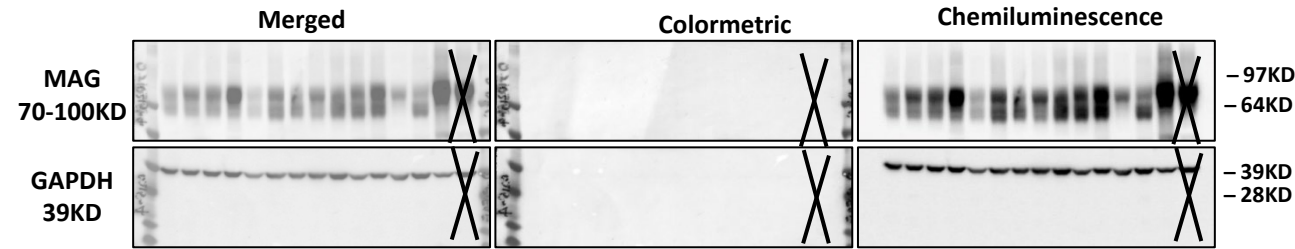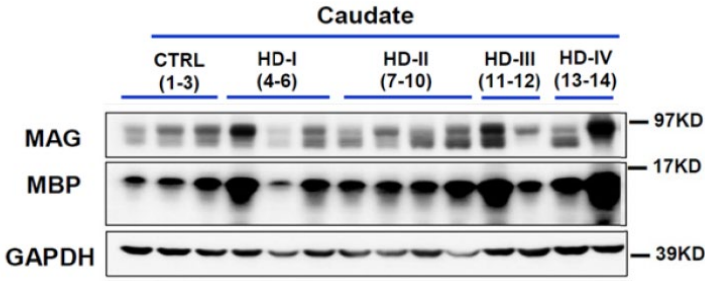

“X” indicates samples that are of a different condition not related to the study

Figure S8B - Gels 0301 – 0304, SGK1, ~50-60KD

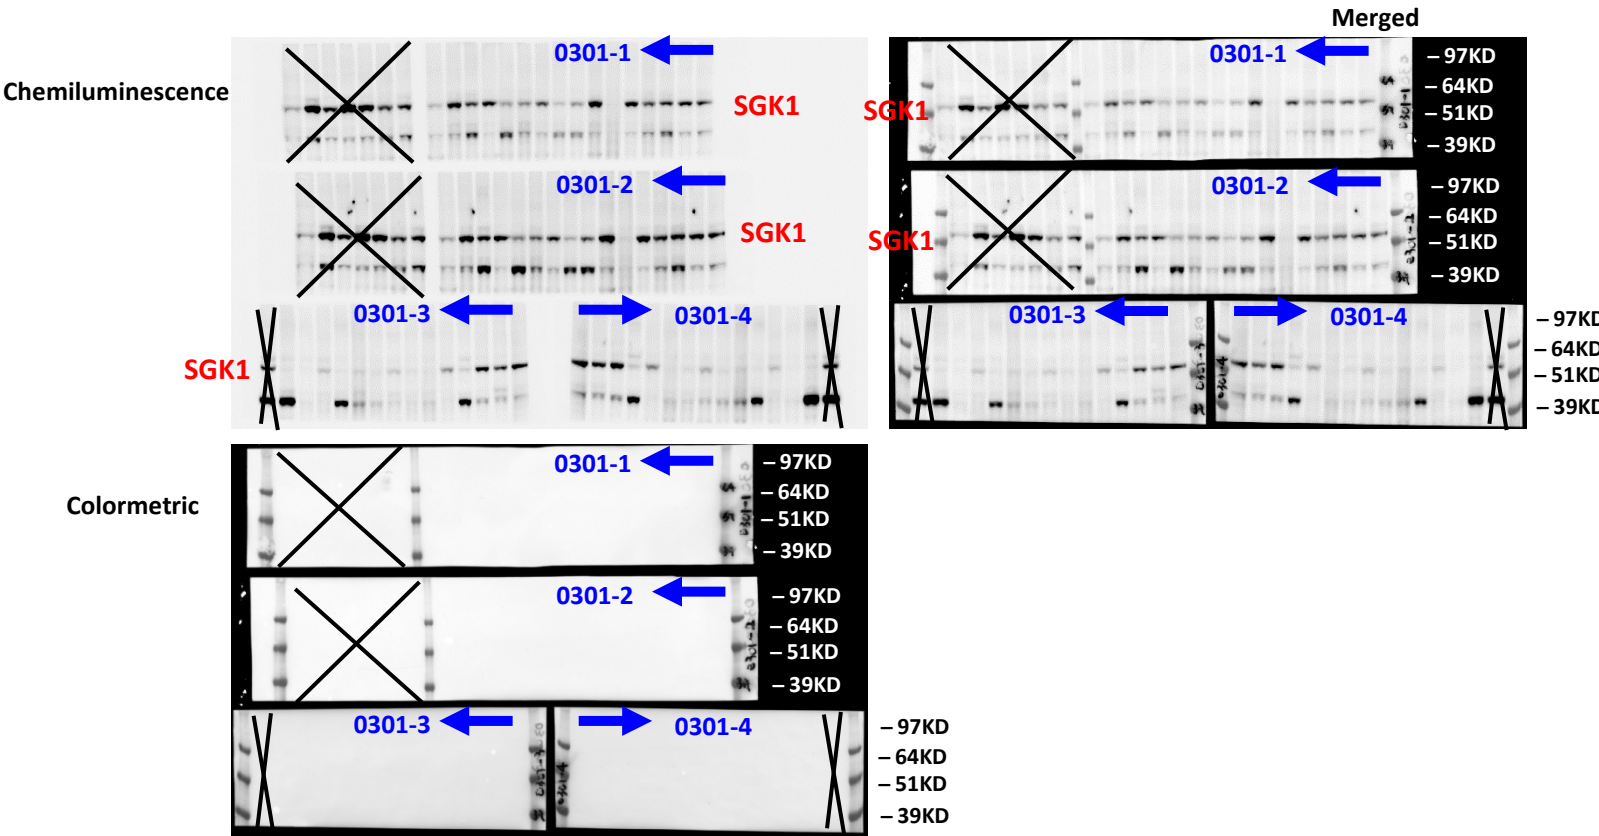

0301 – 0304, GAPDH, 39KD – used for calculating relative abundance of protein – presented in quantifications

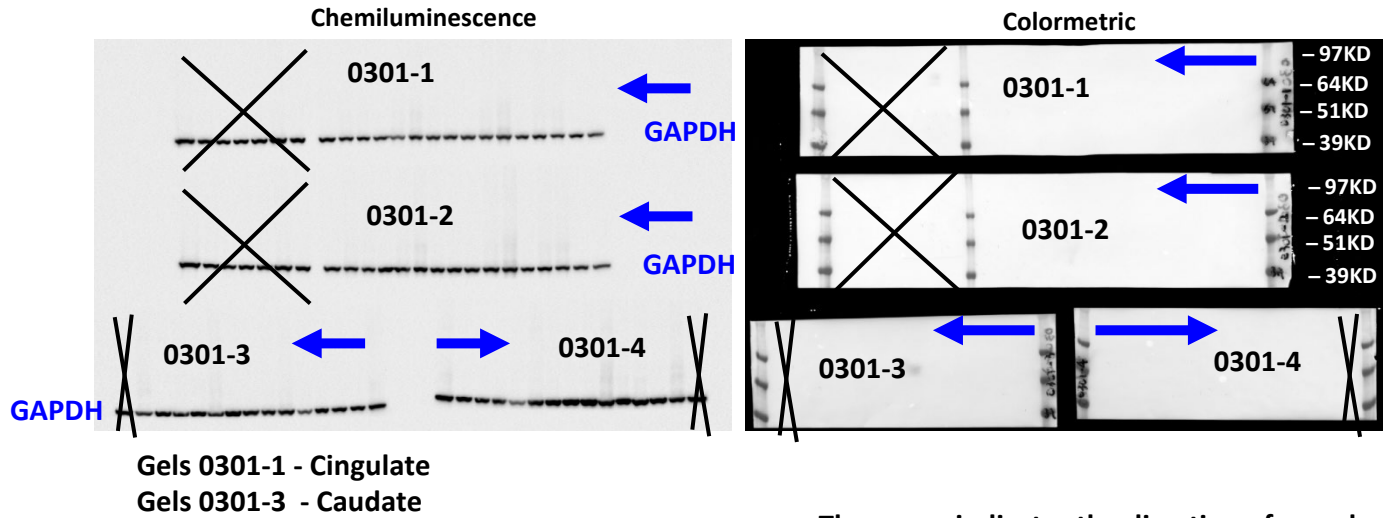

The arrow indicates the direction of samples with respect to those in the figure – right pointing arrow means same order, left pointing arrow indicates reverse order

“X” indicates samples of a different condition not related to the study

Gels 0301-1 and 0301-2 are duplicates  
Gels 0301-3 and 0301-4 are duplicates

5492 and Prkce insolb Cortex R6/2

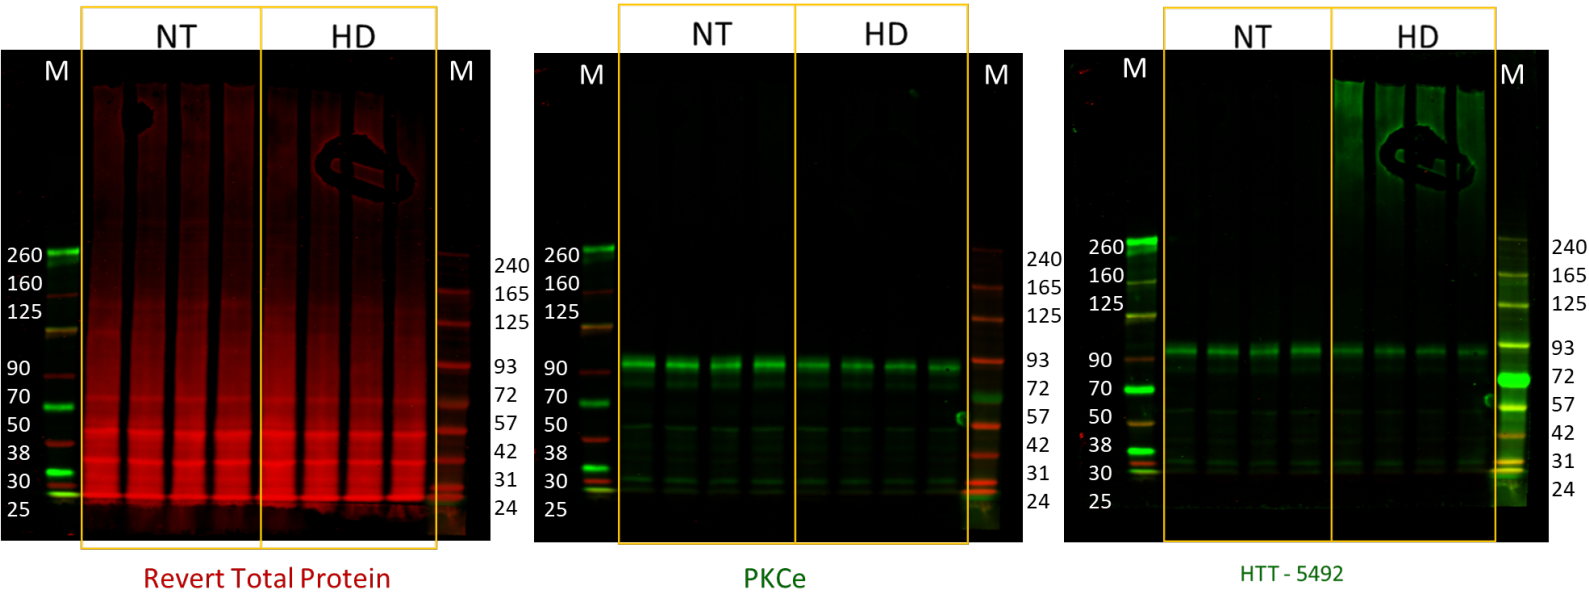

5492 and Prkce insolb Striatum R6/2

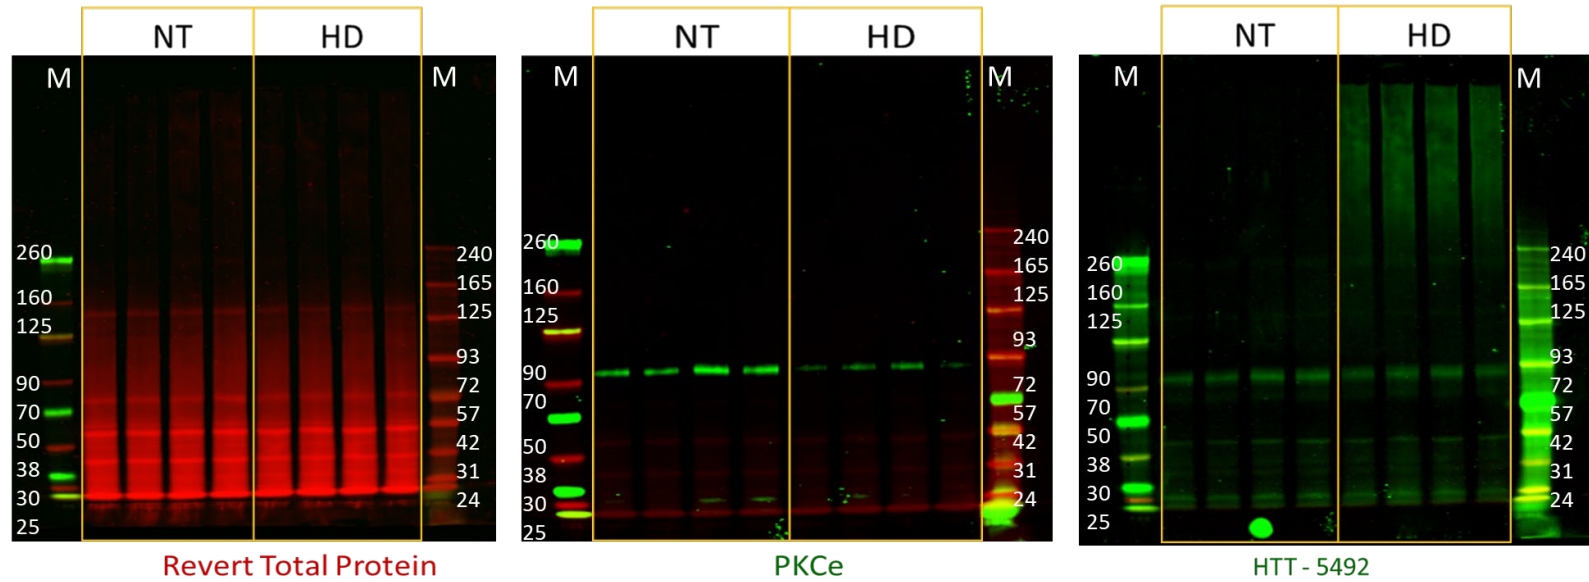



DGKB Cortex R6/2

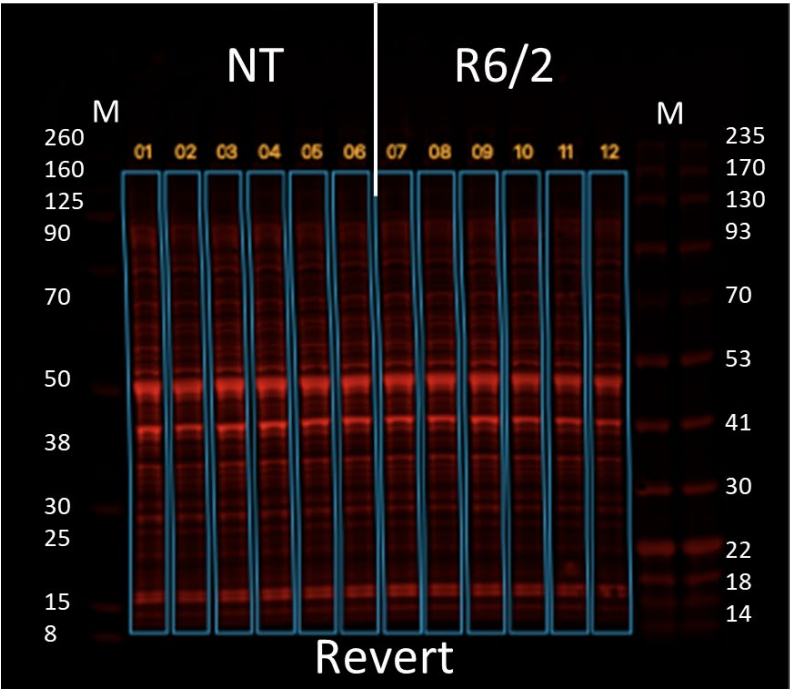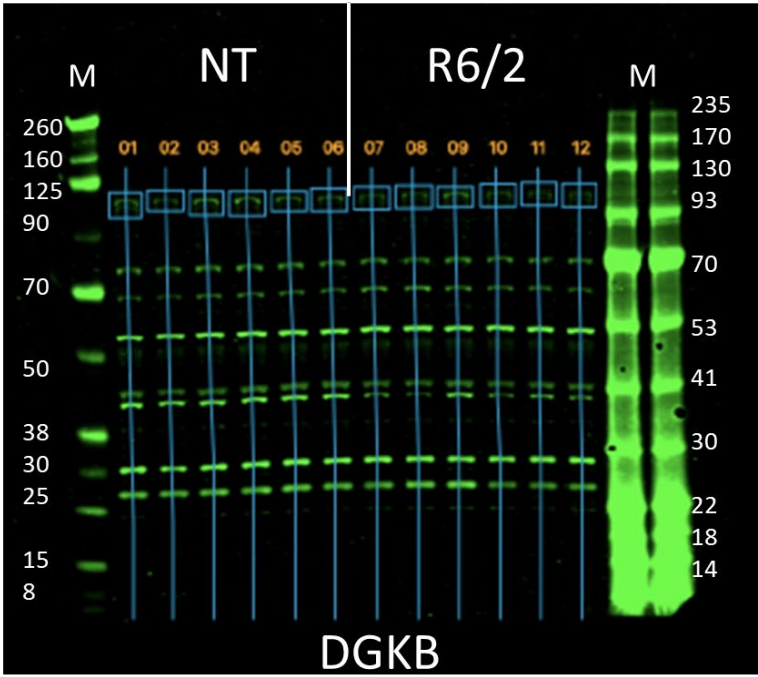

DGKB Striatum R6/2

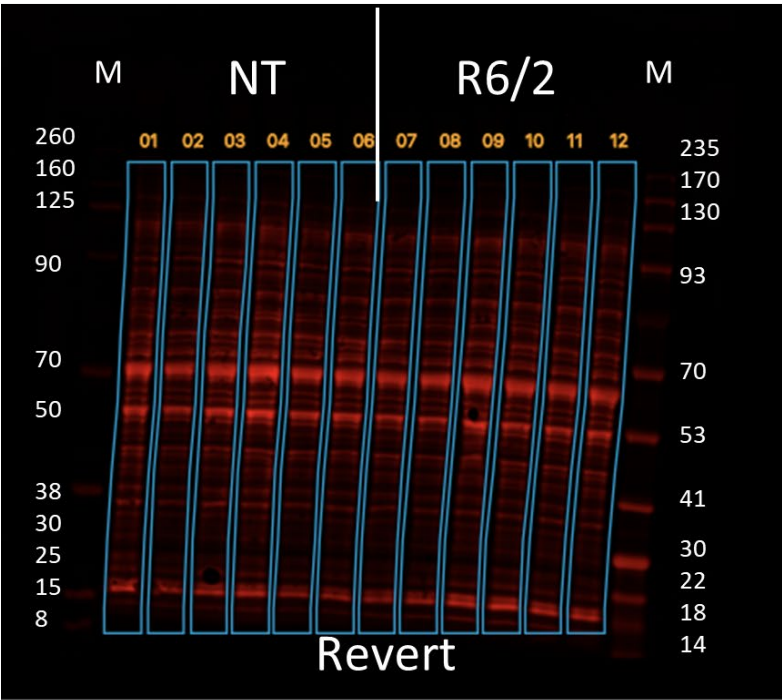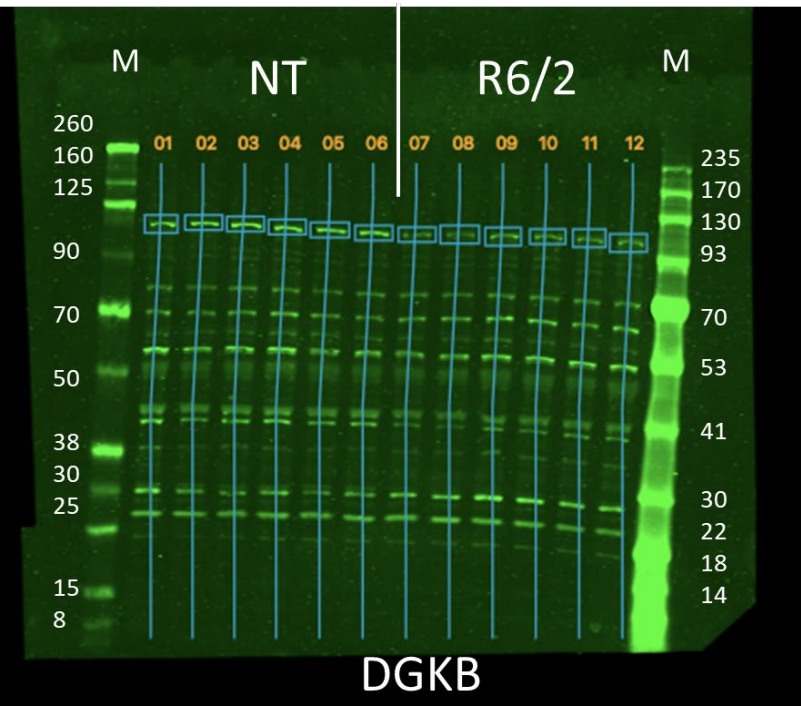

Figure S9e - GPI – Revert (cortex & striatum)

Gpi1 Cortex R6/2

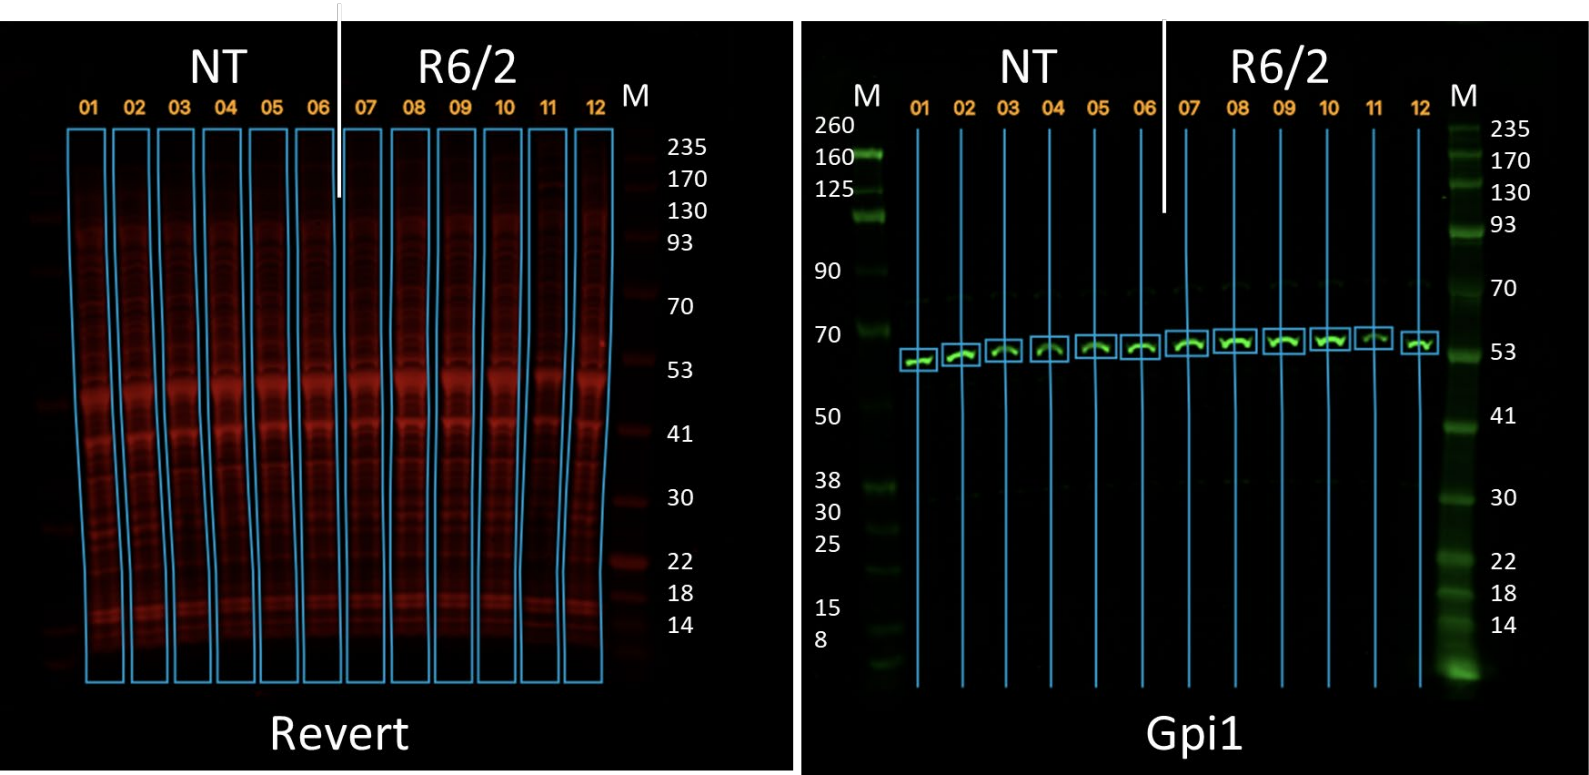

Gpi1 Striatum R6/2

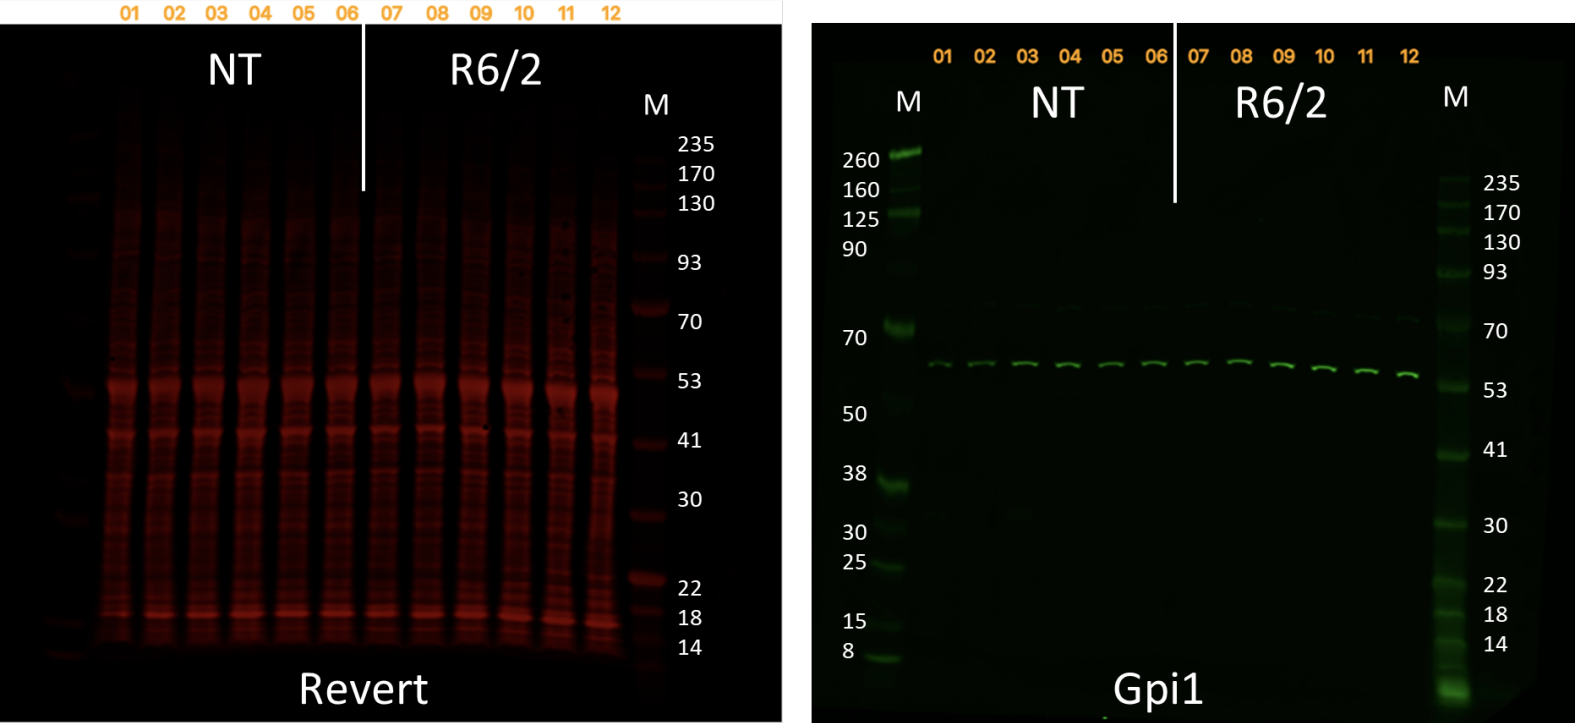



Sgk1 Cortex R6/2

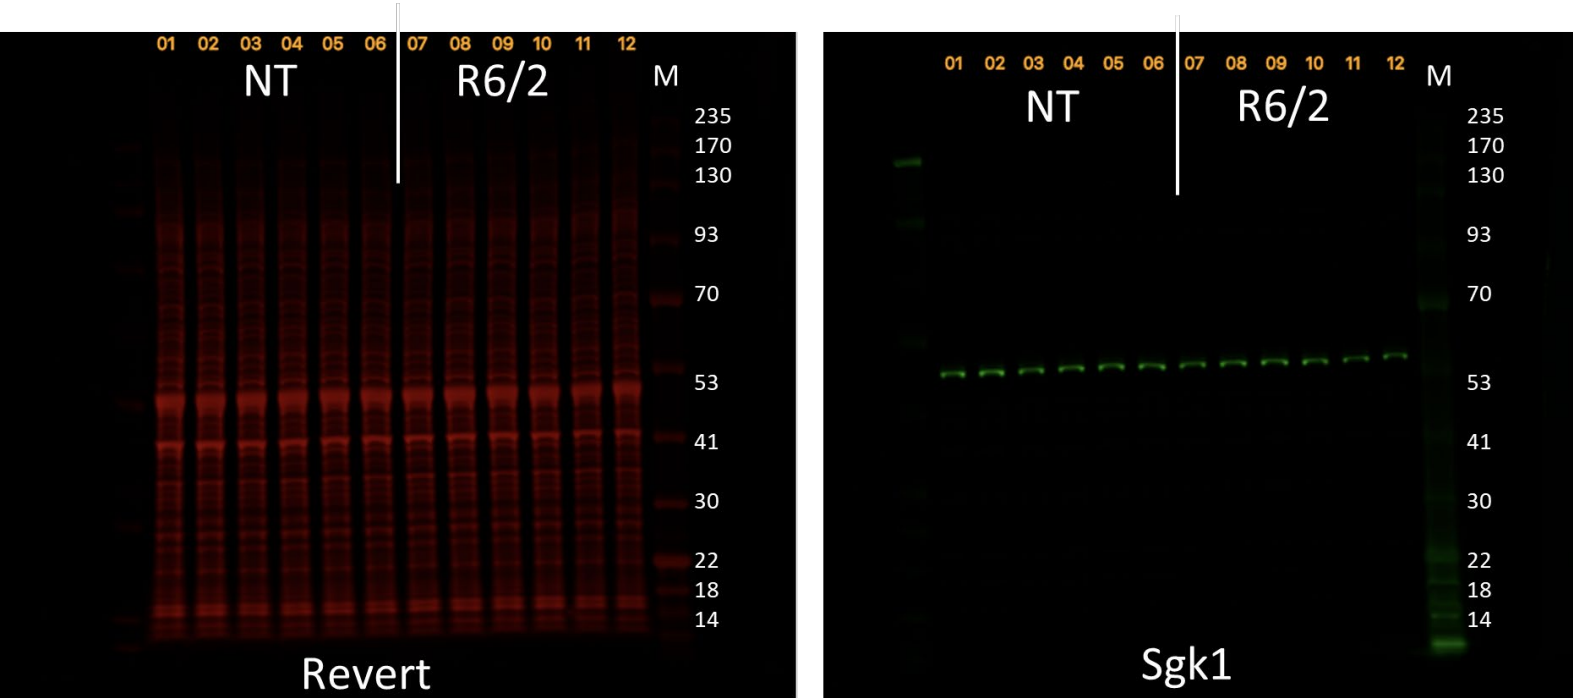

Sgk1 Striatum R6/2

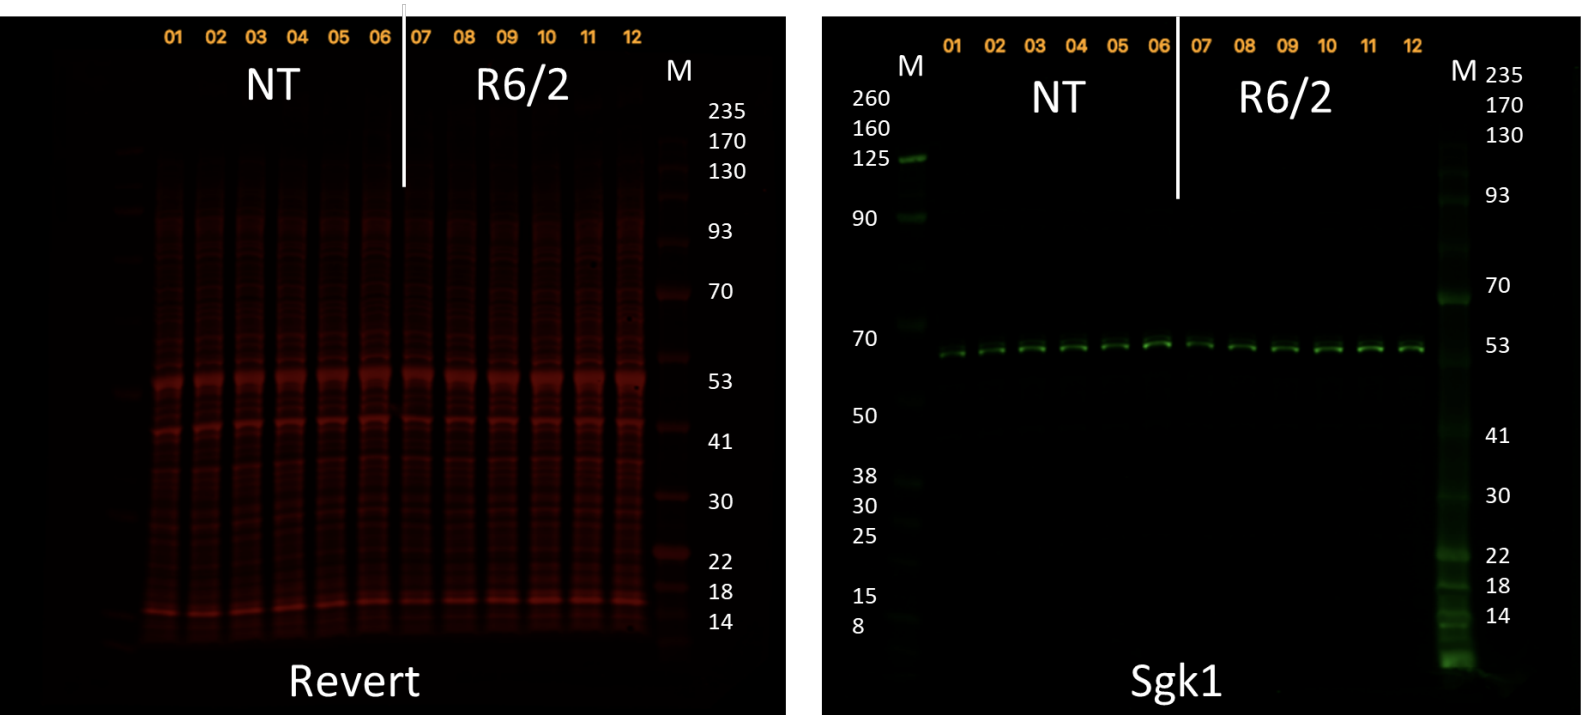

Supplement: 41467_2022_35388_MOESM16_ESM.zip [file 41467_2022_35388_MOESM16_ESM.zip]
