# Supplementary material for: Huntington disease oligodendrocyte maturation deficits revealed by single-nucleus RNAseq are rescued by thiamine-biotin supplementation
Source: PubMed Central journal article supplement (PMC9772349; doi:10.1038/s41467-022-35388-x), 2022-12-21
Supplement: 41467_2022_35388_MOESM2_ESM.pdf [file 41467_2022_35388_MOESM2_ESM.pdf]

**Title:** Supplementary Data 1.

**Description:** Mouse DEGs per cell type

**Title:** Supplementary Data 2.

**Description:** Integrated mouse OPC and OL DEGs

**Title:** Supplementary Data 3.

**Description:** Mouse WGCNA & cWGCNA gene members, WGCNA stats

**Title:** Supplementary Data 4.

**Description:** Causal network gene members and interactions, IRIS3, LISA.

**Title:** Supplementary Data 5.

**Description:** ATACseq Tobias differential binding results

**Title:** Supplementary Data 6.

**Description:** Human sample metadata and demographics

**Title:** Supplementary Data 7.

**Description:** Human cluster markers regression CAG by lineage

**Title:** Supplementary Data 8.

**Description:** Human DEGs OPC and OL by region, GO, and venn analysis

**Title:** Supplementary Data 9.

**Description:** Human Gene module scores by lineage grade levine clusters

**Title:** Supplementary Data 10.

**Description:** R61 genotype DEGs

**Title:** Supplementary Data 11.

**Description:** R61 TB v Veh DEGs

**Title:** Supplementary Data 12.

**Description:** R61 TB v NT DEGs
