# Supplementary material for: Huntington disease oligodendrocyte maturation deficits revealed by single-nucleus RNAseq are rescued by thiamine-biotin supplementation
Source: Nat Commun. 2022 Dec 21;13:7791. doi: 10.1038/s41467-022-35388-x (PMC9772349; doi:10.1038/s41467-022-35388-x)
Supplement: Supplementary file 3 — Supplementary Dataset 1 [file 41467_2022_35388_MOESM3_ESM.csv]

Gene	log2FC	padj	Up-Down	Cluster	cell.type	region
Tpk1	0.623955778	1.29E-31	Up	Cluster_5	Astrocyte	12str
Gm26835	-0.325168739	5.97E-09	Down	Cluster_5	Astrocyte	12str
Guf1	0.504143576	2.39E-23	Up	Cluster_5	Astrocyte	12str
Tra2a	0.425644054	1.41E-22	Up	Cluster_5	Astrocyte	12str
Crebzf	0.263899359	0.00000206	Up	Cluster_5	Astrocyte	12str
Dpyd	0.357014608	6.1E-10	Up	Cluster_5	Astrocyte	12str
Galnt18	-0.538852584	1.75E-14	Down	Cluster_5	Astrocyte	12str
Ogt	0.283406413	7.11E-10	Up	Cluster_5	Astrocyte	12str
Pde10a	-0.81468205	1.78E-16	Down	Cluster_5	Astrocyte	12str
Polr2a	0.624674066	3.41E-32	Up	Cluster_5	Astrocyte	12str
Acyp2	0.256520943	0.0000517	Up	Cluster_5	Astrocyte	12str
Camk2d	0.344742215	4.19E-16	Up	Cluster_5	Astrocyte	12str
Chuk	0.3024946	6.02E-08	Up	Cluster_5	Astrocyte	12str
Ddx5	0.317112251	3.46E-19	Up	Cluster_5	Astrocyte	12str
Kcnq1ot1	0.323537504	0.000051	Up	Cluster_5	Astrocyte	12str
Mapk4	-0.418503717	1.45E-24	Down	Cluster_5	Astrocyte	12str
Pde1c	0.303234014	0.002420259	Up	Cluster_5	Astrocyte	12str
Plcb1	-0.329147403	2.33E-12	Down	Cluster_5	Astrocyte	12str
Plp1	-0.264557635	0.002256371	Down	Cluster_5	Astrocyte	12str
Trpm3	-0.28474957	2.08E-11	Down	Cluster_5	Astrocyte	12str
2210408I21Rik	0.287803479	5.88E-08	Up	Cluster_5	Astrocyte	12str
A930015D03Rik	0.328694302	3.14E-13	Up	Cluster_5	Astrocyte	12str
Aig1	0.252404861	0.000601525	Up	Cluster_5	Astrocyte	12str
Arid5b	0.377373387	7.65E-10	Up	Cluster_5	Astrocyte	12str
Dclk1	-0.297187107	5.07E-10	Down	Cluster_5	Astrocyte	12str
Erc2	0.260812644	0.063155987	Up	Cluster_5	Astrocyte	12str
Fgf14	0.320251689	3.93E-21	Up	Cluster_5	Astrocyte	12str
Gabra2	0.291602532	0.00000521	Up	Cluster_5	Astrocyte	12str
Gm16168	-0.353019336	0.021791063	Down	Cluster_5	Astrocyte	12str
Gm21954	-0.277876663	0.000000573	Down	Cluster_5	Astrocyte	12str
Gpr158	-0.280335763	0.029173569	Down	Cluster_5	Astrocyte	12str
Kif21a	0.252703536	2.68E-08	Up	Cluster_5	Astrocyte	12str
Lsamp	-0.272467674	5.18E-55	Down	Cluster_5	Astrocyte	12str
Pitpnm2	-0.327906896	0.000000136	Down	Cluster_5	Astrocyte	12str
Slc4a4	-0.379845846	7.81E-32	Down	Cluster_5	Astrocyte	12str
Sorbs1	-0.274323931	0.026061815	Down	Cluster_5	Astrocyte	12str
Zbtb16	-0.749091195	2.12E-32	Down	Cluster_5	Astrocyte	12str
4930448N21Rik	-0.289669236	1.92E-10	Down	Cluster_5	Astrocyte	12str
5031439G07Rik	-0.431802762	3.25E-12	Down	Cluster_5	Astrocyte	12str
Agbl4	0.575033497	2.14E-24	Up	Cluster_5	Astrocyte	12str
Akt3	0.26846289	4.83E-10	Up	Cluster_5	Astrocyte	12str
Cacna1a	0.288548053	0.000102124	Up	Cluster_5	Astrocyte	12str
Ccdc85a	-0.274624952	0.057772088	Down	Cluster_5	Astrocyte	12str
Ccnd3	-0.455519409	2.02E-15	Down	Cluster_5	Astrocyte	12str
Metap1d	0.360641693	2.42E-12	Up	Cluster_5	Astrocyte	12str
Naaladl2	0.411474244	2.17E-15	Up	Cluster_5	Astrocyte	12str
Phactr3	-0.297928325	7.55E-14	Down	Cluster_5	Astrocyte	12str
Rnf121	-0.6511529	1.57E-27	Down	Cluster_5	Astrocyte	12str
Rtn1	0.286056945	5.82E-08	Up	Cluster_5	Astrocyte	12str
Sema6a	0.414113097	5.76E-14	Up	Cluster_5	Astrocyte	12str
Trim9	-0.309230578	1.34E-17	Down	Cluster_5	Astrocyte	12str
Ttyh1	-0.467716787	5.64E-44	Down	Cluster_5	Astrocyte	12str
Abca1	0.470644797	2.11E-38	Up	Cluster_5	Astrocyte	12str
Atp1a2	-0.482504786	2E-64	Down	Cluster_5	Astrocyte	12str
Bcl6	-0.344844086	8.57E-08	Down	Cluster_5	Astrocyte	12str
Cadm1	-0.26283623	4.11E-12	Down	Cluster_5	Astrocyte	12str
Clmn	-0.342783772	1.22E-15	Down	Cluster_5	Astrocyte	12str
Csrp1	-0.472830195	6.6E-28	Down	Cluster_5	Astrocyte	12str
Daam2	-0.27060532	1.92E-11	Down	Cluster_5	Astrocyte	12str
Dab1	-0.250196378	0.002213833	Down	Cluster_5	Astrocyte	12str
Ednrb	-0.255989648	0.000271759	Down	Cluster_5	Astrocyte	12str
Eps8	-0.308360001	3.35E-09	Down	Cluster_5	Astrocyte	12str
Farp1	-0.602529305	7.93E-83	Down	Cluster_5	Astrocyte	12str
Gabbr2	-0.289131085	0.000663124	Down	Cluster_5	Astrocyte	12str
Glul	-0.534990626	8.26E-36	Down	Cluster_5	Astrocyte	12str
Gm3764	-0.477757083	2.17E-68	Down	Cluster_5	Astrocyte	12str
Gm44151	-0.400101915	2.3E-15	Down	Cluster_5	Astrocyte	12str
Gm4876	0.470054475	4.17E-16	Up	Cluster_5	Astrocyte	12str
Gnao1	-0.260447667	0.000000382	Down	Cluster_5	Astrocyte	12str
Gria2	-0.43199038	2.24E-38	Down	Cluster_5	Astrocyte	12str
Hes5	-0.346729373	0.000000632	Down	Cluster_5	Astrocyte	12str
Hmgn3	-0.282886113	0.000000118	Down	Cluster_5	Astrocyte	12str
Hspa8	0.259163512	0.00000556	Up	Cluster_5	Astrocyte	12str
Htra1	-0.436452874	1.72E-23	Down	Cluster_5	Astrocyte	12str
Igsf8	-0.447690884	8.98E-30	Down	Cluster_5	Astrocyte	12str
Kank1	-0.265309885	6.25E-09	Down	Cluster_5	Astrocyte	12str
Kcnn2	-0.626981487	1.3E-34	Down	Cluster_5	Astrocyte	12str
Maml3	0.294817925	0.0000972	Up	Cluster_5	Astrocyte	12str
Mertk	-0.454028863	7.29E-29	Down	Cluster_5	Astrocyte	12str
Nrxn3	0.304965616	0.000000093	Up	Cluster_5	Astrocyte	12str
Ntrk2	-0.322810232	1.07E-20	Down	Cluster_5	Astrocyte	12str
Pitpnc1	-0.434357608	9.31E-35	Down	Cluster_5	Astrocyte	12str
Plpp3	-0.266763749	1.66E-25	Down	Cluster_5	Astrocyte	12str
Qk	-0.457141661	6.88E-76	Down	Cluster_5	Astrocyte	12str
Rgs7	0.294255398	0.0000026	Up	Cluster_5	Astrocyte	12str
Sgcd	0.687718034	1.04E-14	Up	Cluster_5	Astrocyte	12str
Slc1a2	-0.592985548	1.47E-76	Down	Cluster_5	Astrocyte	12str
Sox5	0.305304443	1.12E-16	Up	Cluster_5	Astrocyte	12str
Sparcl1	-0.467047713	6.04E-42	Down	Cluster_5	Astrocyte	12str
Sycp2	-0.268027195	0.00135102	Down	Cluster_5	Astrocyte	12str
Trim2	0.342322232	3.12E-10	Up	Cluster_5	Astrocyte	12str
Trp53bp2	-0.291068736	0.00000564	Down	Cluster_5	Astrocyte	12str
Tspan7	-0.393147928	1.21E-22	Down	Cluster_5	Astrocyte	12str
Ubash3b	0.338031624	0.000000668	Up	Cluster_5	Astrocyte	12str
Ubb	0.32074815	5.55E-12	Up	Cluster_5	Astrocyte	12str
Zfp950	0.336511993	3.24E-11	Up	Cluster_5	Astrocyte	12str
march3	0.462543849	1.07E-17	Up	Cluster_5	Astrocyte	12str
2310022B05Rik	-0.349684395	2.59E-10	Down	Cluster_5	Astrocyte	12str
9530026P05Rik	0.374304032	1.35E-08	Up	Cluster_5	Astrocyte	12str
Acsl3	-0.474525089	3.98E-36	Down	Cluster_5	Astrocyte	12str
Adcy2	-0.274534549	1.82E-09	Down	Cluster_5	Astrocyte	12str
Adrbk2	-0.257341585	6.43E-12	Down	Cluster_5	Astrocyte	12str
Ahcyl1	-0.284746478	5.33E-10	Down	Cluster_5	Astrocyte	12str
Aifm3	-0.25417429	0.00000231	Down	Cluster_5	Astrocyte	12str
Aldoc	-0.297329553	0.000000727	Down	Cluster_5	Astrocyte	12str
Atp5o	-0.250078412	0.000102745	Down	Cluster_5	Astrocyte	12str
Cables1	-0.716223387	3.73E-51	Down	Cluster_5	Astrocyte	12str
Camk2g	-0.395549982	4.96E-25	Down	Cluster_5	Astrocyte	12str
Cep85l	-0.275971079	0.00000024	Down	Cluster_5	Astrocyte	12str
Cmtm5	-0.276919638	0.000000928	Down	Cluster_5	Astrocyte	12str
Cntn1	-0.309445295	0.00000734	Down	Cluster_5	Astrocyte	12str
Col4a5	0.269222777	0.000000245	Up	Cluster_5	Astrocyte	12str
Cpq	0.28723714	0.00000196	Up	Cluster_5	Astrocyte	12str
Cst3	-0.288898226	3.65E-14	Down	Cluster_5	Astrocyte	12str
Cyp4f15	-0.256747233	0.00018559	Down	Cluster_5	Astrocyte	12str
D030047H15Rik	-0.51053734	2.98E-30	Down	Cluster_5	Astrocyte	12str
Dgki	0.277175881	0.000000315	Up	Cluster_5	Astrocyte	12str
Emx2os	-0.312021586	0.0000367	Down	Cluster_5	Astrocyte	12str
Etnppl	-0.95299154	1.09E-56	Down	Cluster_5	Astrocyte	12str
F3	-0.403169624	4.58E-16	Down	Cluster_5	Astrocyte	12str
Fads1	-0.304314063	0.000000182	Down	Cluster_5	Astrocyte	12str
Fam107a	-0.434815195	8.66E-19	Down	Cluster_5	Astrocyte	12str
Fam20a	-0.34335562	8.95E-13	Down	Cluster_5	Astrocyte	12str
Folh1	-0.270573946	0.000310189	Down	Cluster_5	Astrocyte	12str
Fry	-0.363525135	0.0017758	Down	Cluster_5	Astrocyte	12str
Gjb6	-0.3763581	7.23E-14	Down	Cluster_5	Astrocyte	12str
Glud1	-0.300672435	3.34E-15	Down	Cluster_5	Astrocyte	12str
Gm11713	-0.264983672	0.001873938	Down	Cluster_5	Astrocyte	12str
Gm12239	-0.335483519	1.42E-11	Down	Cluster_5	Astrocyte	12str
Gm26704	-0.427207346	6.56E-23	Down	Cluster_5	Astrocyte	12str
Gm26843	-0.294113066	7.91E-09	Down	Cluster_5	Astrocyte	12str
Gm9925	-0.337078102	1.15E-09	Down	Cluster_5	Astrocyte	12str
Grin2b	0.282957937	0.000000366	Up	Cluster_5	Astrocyte	12str
Grin2c	-0.498585812	1.12E-26	Down	Cluster_5	Astrocyte	12str
Hif3a	-0.685237795	1.66E-39	Down	Cluster_5	Astrocyte	12str
Igf2bp3	0.325299676	0.00000408	Up	Cluster_5	Astrocyte	12str
Itih3	-0.632178736	1.28E-13	Down	Cluster_5	Astrocyte	12str
Kdm5b	-0.295627464	0.0000157	Down	Cluster_5	Astrocyte	12str
L3mbtl3	0.345181532	3.16E-09	Up	Cluster_5	Astrocyte	12str
Lamp2	0.278296063	0.00000014	Up	Cluster_5	Astrocyte	12str
Lhfp	-0.446690686	2.84E-10	Down	Cluster_5	Astrocyte	12str
Lrig1	-0.446568337	3.39E-13	Down	Cluster_5	Astrocyte	12str
Mical2	-0.529697227	3.73E-39	Down	Cluster_5	Astrocyte	12str
Mllt3	0.286834618	0.000000659	Up	Cluster_5	Astrocyte	12str
Mmd2	-0.269293777	3.41E-12	Down	Cluster_5	Astrocyte	12str
Mycbp	0.313041429	1.88E-09	Up	Cluster_5	Astrocyte	12str
Myrip	-0.416426289	2.54E-18	Down	Cluster_5	Astrocyte	12str
Ndrg2	-0.394263907	8.83E-20	Down	Cluster_5	Astrocyte	12str
Nebl	-0.357419319	4.77E-16	Down	Cluster_5	Astrocyte	12str
Nt5c2	-0.282339411	4.35E-09	Down	Cluster_5	Astrocyte	12str
Ntsr2	-0.451060032	7.22E-29	Down	Cluster_5	Astrocyte	12str
Nwd1	-0.364350784	2.39E-22	Down	Cluster_5	Astrocyte	12str
Nxn	-0.298655994	0.0000226	Down	Cluster_5	Astrocyte	12str
Paqr8	-0.483229005	4.18E-29	Down	Cluster_5	Astrocyte	12str
Phka1	-0.444913514	2.29E-21	Down	Cluster_5	Astrocyte	12str
Phkg1	-0.461585236	2.8E-35	Down	Cluster_5	Astrocyte	12str
Pign	0.255878477	0.00000489	Up	Cluster_5	Astrocyte	12str
Pnpla7	-0.309162482	0.000000092	Down	Cluster_5	Astrocyte	12str
Prodh	-0.303022372	5.71E-08	Down	Cluster_5	Astrocyte	12str
Rapgef3	-0.301631563	4.98E-08	Down	Cluster_5	Astrocyte	12str
Rmst	-0.416484592	4.72E-11	Down	Cluster_5	Astrocyte	12str
Robo2	0.421379345	1.06E-10	Up	Cluster_5	Astrocyte	12str
Sat1	-0.40085764	5.72E-16	Down	Cluster_5	Astrocyte	12str
Sema4a	-0.271159541	0.000000654	Down	Cluster_5	Astrocyte	12str
Slc25a21	0.447167468	2.7E-14	Up	Cluster_5	Astrocyte	12str
Slc6a11	-0.53310693	1.78E-12	Down	Cluster_5	Astrocyte	12str
Slc7a10	-0.255332943	0.000332791	Down	Cluster_5	Astrocyte	12str
Smox	-0.28610427	1.34E-08	Down	Cluster_5	Astrocyte	12str
Sncaip	0.48898766	2.13E-19	Up	Cluster_5	Astrocyte	12str
Snhg20	0.26615163	3.97E-08	Up	Cluster_5	Astrocyte	12str
Tef	-0.251506871	0.0000133	Down	Cluster_5	Astrocyte	12str
Usp53	-0.298338117	0.002612624	Down	Cluster_5	Astrocyte	12str
Vegfa	-0.345410214	1.88E-09	Down	Cluster_5	Astrocyte	12str
Wnk2	-0.354328808	2.29E-09	Down	Cluster_5	Astrocyte	12str
A930015D03Rik	0.350029714	1.09083e-16	Up	Subclustered_HDvCTR	Astrocyte	8str
Ddx5	0.43075624	1.0312e-40	Up	Subclustered_HDvCTR	Astrocyte	8str
Tra2a	0.344352263	2.26575e-19	Up	Subclustered_HDvCTR	Astrocyte	8str
Chuk	0.334113551	3.90839e-14	Up	Subclustered_HDvCTR	Astrocyte	8str
Nnat	-0.408336176	0.0068629	Down	Subclustered_HDvCTR	Astrocyte	8str
Phactr1	-0.392193456	5.6363e-19	Down	Subclustered_HDvCTR	Astrocyte	8str
Polr2a	0.455806718	1.54256e-18	Up	Subclustered_HDvCTR	Astrocyte	8str
Guf1	0.367272133	6.81632e-17	Up	Subclustered_HDvCTR	Astrocyte	8str
Plp1	-0.347891306	1.60507e-08	Down	Subclustered_HDvCTR	Astrocyte	8str
Adrbk2	-0.311641516	6.4688e-18	Down	Subclustered_HDvCTR	Astrocyte	8str
L3mbtl3	0.272097396	3.63788e-07	Up	Subclustered_HDvCTR	Astrocyte	8str
Nav3	-0.255228629	0.000723516	Down	Subclustered_HDvCTR	Astrocyte	8str
Nrg1	-0.819585369	2.19552e-06	Down	Subclustered_HDvCTR	Astrocyte	8str
Ptn	-0.29832654	3.50997e-06	Down	Subclustered_HDvCTR	Astrocyte	8str
Robo2	0.299840146	4.52948e-06	Up	Subclustered_HDvCTR	Astrocyte	8str
Slc4a4	-0.288254236	2.7691e-15	Down	Subclustered_HDvCTR	Astrocyte	8str
9330159F19Rik	0.272656817	2.64425e-07	Up	Subclustered_HDvCTR	Astrocyte	8str
Abca1	0.28486889	6.94215e-14	Up	Subclustered_HDvCTR	Astrocyte	8str
Arpp21	-0.287917942	5.9344e-07	Down	Subclustered_HDvCTR	Astrocyte	8str
Cdh19	0.31018961	1.13017e-10	Up	Subclustered_HDvCTR	Astrocyte	8str
Cspg5	-0.288763044	2.42926e-11	Down	Subclustered_HDvCTR	Astrocyte	8str
Dlg2	-0.259387145	2.02901e-06	Down	Subclustered_HDvCTR	Astrocyte	8str
Ednrb	-0.301622327	9.46345e-06	Down	Subclustered_HDvCTR	Astrocyte	8str
Fgf14	0.292812409	5.20381e-14	Up	Subclustered_HDvCTR	Astrocyte	8str
Gabra2	0.267006652	2.01867e-05	Up	Subclustered_HDvCTR	Astrocyte	8str
Galnt16	-0.318792584	2.32327e-10	Down	Subclustered_HDvCTR	Astrocyte	8str
Gm3764	-0.434553106	3.06707e-59	Down	Subclustered_HDvCTR	Astrocyte	8str
Meis1	0.28128536	7.44522e-08	Up	Subclustered_HDvCTR	Astrocyte	8str
Mgat5	-0.354615966	1.26147e-06	Down	Subclustered_HDvCTR	Astrocyte	8str
Mtss1l	-0.283278429	1.63829e-07	Down	Subclustered_HDvCTR	Astrocyte	8str
Pcyt2	-0.262411154	9.69899e-06	Down	Subclustered_HDvCTR	Astrocyte	8str
Phyhipl	-0.257913254	2.66587e-05	Down	Subclustered_HDvCTR	Astrocyte	8str
Pitpnc1	-0.338508201	6.72753e-23	Down	Subclustered_HDvCTR	Astrocyte	8str
Sgcd	0.4483279	6.34664e-11	Up	Subclustered_HDvCTR	Astrocyte	8str
Slc1a2	-0.310859963	5.0171e-34	Down	Subclustered_HDvCTR	Astrocyte	8str
Zfp36l1	-0.379332409	2.11706e-13	Down	Subclustered_HDvCTR	Astrocyte	8str
Zfp949	0.338072764	1.43933e-18	Up	Subclustered_HDvCTR	Astrocyte	8str
1700112E06Rik	0.317734558	1.13513e-08	Up	Subclustered_HDvCTR	Astrocyte	8str
Adra1a	-0.271831183	2.00008e-05	Down	Subclustered_HDvCTR	Astrocyte	8str
Adra1a	-0.271831183	2.00008e-05	Down	Subclustered_HDvCTR	Astrocyte	8str
Arhgef10l	-0.256417537	2.96476e-06	Down	Subclustered_HDvCTR	Astrocyte	8str
Cables1	-0.295718724	5.97458e-05	Down	Subclustered_HDvCTR	Astrocyte	8str
Camk2g	-0.299434683	2.54489e-11	Down	Subclustered_HDvCTR	Astrocyte	8str
Caskin1	-0.25244495	0.000241703	Down	Subclustered_HDvCTR	Astrocyte	8str
Clu	-0.268466948	4.51484e-05	Down	Subclustered_HDvCTR	Astrocyte	8str
Clu	-0.268466948	4.51484e-05	Down	Subclustered_HDvCTR	Astrocyte	8str
Clybl	0.260568252	1.42371e-09	Up	Subclustered_HDvCTR	Astrocyte	8str
Cst3	-0.331057449	3.83113e-20	Down	Subclustered_HDvCTR	Astrocyte	8str
Emx2os	-0.253937248	0.00020542	Down	Subclustered_HDvCTR	Astrocyte	8str
Gabbr1	-0.31690726	9.91988e-13	Down	Subclustered_HDvCTR	Astrocyte	8str
Gm4876	0.299114337	1.10942e-08	Up	Subclustered_HDvCTR	Astrocyte	8str
Hes5	-0.287038375	1.76391e-05	Down	Subclustered_HDvCTR	Astrocyte	8str
Igf2bp3	0.341164399	6.15441e-10	Up	Subclustered_HDvCTR	Astrocyte	8str
Itih3	-0.659126356	1.85561e-19	Down	Subclustered_HDvCTR	Astrocyte	8str
Kcnj10	-0.286333697	7.70738e-07	Down	Subclustered_HDvCTR	Astrocyte	8str
Lrig1	-0.351315225	0.016340097	Down	Subclustered_HDvCTR	Astrocyte	8str
Msmo1	-0.33947484	4.32791e-12	Down	Subclustered_HDvCTR	Astrocyte	8str
Phkg1	-0.276924602	8.36604e-19	Down	Subclustered_HDvCTR	Astrocyte	8str
Plpp3	-0.293243617	2.25696e-30	Down	Subclustered_HDvCTR	Astrocyte	8str
Ptch1	-0.391555068	0.000623166	Down	Subclustered_HDvCTR	Astrocyte	8str
Sfxn5	-0.288675631	2.53579e-24	Down	Subclustered_HDvCTR	Astrocyte	8str
Slc25a21	0.410063686	1.09992e-14	Up	Subclustered_HDvCTR	Astrocyte	8str
Slc6a11	-0.457964736	1.931e-14	Down	Subclustered_HDvCTR	Astrocyte	8str
Slc7a11	-0.36328629	8.04779e-13	Down	Subclustered_HDvCTR	Astrocyte	8str
Tprkb	-0.27340333	6.22191e-09	Down	Subclustered_HDvCTR	Astrocyte	8str
Vegfa	-0.287643159	1.16932e-06	Down	Subclustered_HDvCTR	Astrocyte	8str
RP24-127M20.8	0.502963187	5.35757E-06	Up	Subclustered_HDvCTL	Astrocyte	12ctx
Ppp2r3a	0.300203218	0.050772773	Up	Subclustered_HDvCTL	Astrocyte	12ctx
Zbtb16	-0.889875785	2.22335E-08	Down	Subclustered_HDvCTL	Astrocyte	12ctx
Tpk1	0.667594463	6.2466E-10	Up	Subclustered_HDvCTL	Astrocyte	12ctx
Gm26804	0.331116242	1.18589E-05	Up	Subclustered_HDvCTL	Astrocyte	12ctx
Hspa8	0.402349449	0.000175961	Up	Subclustered_HDvCTL	Astrocyte	12ctx
Pde10a	-1.167840701	0.058170882	Down	Subclustered_HDvCTL	Astrocyte	12ctx
Polr2a	0.409534614	0.0032937	Up	Subclustered_HDvCTL	Astrocyte	12ctx
Son	0.267872513	0.002766846	Up	Subclustered_HDvCTL	Astrocyte	12ctx
Tra2a	0.49194405	4.1067E-06	Up	Subclustered_HDvCTL	Astrocyte	12ctx
Zfp950	0.332344095	0.029264872	Up	Subclustered_HDvCTL	Astrocyte	12ctx
Cadm1	-0.412953168	5.90845E-12	Down	Subclustered_HDvCTL	Astrocyte	12ctx
Frmd4a	-0.33928583	3.52306E-07	Down	Subclustered_HDvCTL	Astrocyte	12ctx
Lsamp	-0.366058564	9.72913E-24	Down	Subclustered_HDvCTL	Astrocyte	12ctx
Gabbr2	-0.512927191	0.001972811	Down	Subclustered_HDvCTL	Astrocyte	12ctx
Kirrel3	-0.421026632	4.64025E-08	Down	Subclustered_HDvCTL	Astrocyte	12ctx
Nrg3	-0.520332496	0.049970453	Down	Subclustered_HDvCTL	Astrocyte	12ctx
Rbfox1	-0.623096579	0.004863294	Down	Subclustered_HDvCTL	Astrocyte	12ctx
Rnf121	-0.870067263	6.99545E-16	Down	Subclustered_HDvCTL	Astrocyte	12ctx
Slc1a2	-0.588931824	1.80145E-28	Down	Subclustered_HDvCTL	Astrocyte	12ctx
Dcc	0.552640601	4.13971E-07	Up	Subclustered_HDvCTL	Astrocyte	12ctx
Gabra2	0.334313582	0.05585336	Up	Subclustered_HDvCTL	Astrocyte	12ctx
L3mbtl3	0.440785022	0.016476326	Up	Subclustered_HDvCTL	Astrocyte	12ctx
Naaladl2	0.437277926	0.002662945	Up	Subclustered_HDvCTL	Astrocyte	12ctx
Nckap5	0.345228262	3.05601E-07	Up	Subclustered_HDvCTL	Astrocyte	12ctx
Pitpnc1	-0.398552879	1.978E-07	Down	Subclustered_HDvCTL	Astrocyte	12ctx
Plcb1	-0.27557164	0.081899553	Down	Subclustered_HDvCTL	Astrocyte	12ctx
Slc24a3	0.27794988	0.033197155	Up	Subclustered_HDvCTL	Astrocyte	12ctx
Slc35f1	0.426193274	0.000535897	Up	Subclustered_HDvCTL	Astrocyte	12ctx
Sox5	0.33055222	0.000259375	Up	Subclustered_HDvCTL	Astrocyte	12ctx
A930015D03Rik	0.349996769	0.040955204	Up	Subclustered_HDvCTL	Astrocyte	12ctx
Asic2	-0.450690522	0.000138904	Down	Subclustered_HDvCTL	Astrocyte	12ctx
Cmss1	0.380377847	0.000357327	Up	Subclustered_HDvCTL	Astrocyte	12ctx
Gm3764	-0.547262667	8.29725E-24	Down	Subclustered_HDvCTL	Astrocyte	12ctx
Gria2	-0.398583459	2.57014E-08	Down	Subclustered_HDvCTL	Astrocyte	12ctx
Mdga2	-0.262190563	0.00036274	Down	Subclustered_HDvCTL	Astrocyte	12ctx
Meis2	0.330997777	0.000303017	Up	Subclustered_HDvCTL	Astrocyte	12ctx
Mical2	-0.62311338	7.54471E-12	Down	Subclustered_HDvCTL	Astrocyte	12ctx
Myo1e	0.366191118	0.015873287	Up	Subclustered_HDvCTL	Astrocyte	12ctx
Myrip	-0.42181494	0.076000079	Down	Subclustered_HDvCTL	Astrocyte	12ctx
Ntm	-0.277294303	7.28231E-13	Down	Subclustered_HDvCTL	Astrocyte	12ctx
Rbm26	0.303509031	0.037171757	Up	Subclustered_HDvCTL	Astrocyte	12ctx
Rbms3	0.475925119	0.007469741	Up	Subclustered_HDvCTL	Astrocyte	12ctx
Ttyh2	0.312938349	0.032885272	Up	Subclustered_HDvCTL	Astrocyte	12ctx
U2surp	0.333832299	0.060048585	Up	Subclustered_HDvCTL	Astrocyte	12ctx
Abca1	0.439842911	0.001645292	Up	Subclustered_HDvCTL	Astrocyte	12ctx
Atp1a2	-0.53748091	4.30447E-16	Down	Subclustered_HDvCTL	Astrocyte	12ctx
Ccnd3	-0.519351206	0.001086878	Down	Subclustered_HDvCTL	Astrocyte	12ctx
Clmn	-0.449242935	4.46491E-07	Down	Subclustered_HDvCTL	Astrocyte	12ctx
Clock	0.4175983	0.020461154	Up	Subclustered_HDvCTL	Astrocyte	12ctx
Ddx5	0.456213622	1.60801E-06	Up	Subclustered_HDvCTL	Astrocyte	12ctx
Eps8	-0.425304891	0.000606761	Down	Subclustered_HDvCTL	Astrocyte	12ctx
Gm4876	0.386882821	0.048367922	Up	Subclustered_HDvCTL	Astrocyte	12ctx
Kif21a	0.334235967	0.008086387	Up	Subclustered_HDvCTL	Astrocyte	12ctx
Luzp2	-0.488259576	2.62903E-09	Down	Subclustered_HDvCTL	Astrocyte	12ctx
Nrxn1	-0.271464111	4.02683E-18	Down	Subclustered_HDvCTL	Astrocyte	12ctx
Qk	-0.393405622	7.13964E-12	Down	Subclustered_HDvCTL	Astrocyte	12ctx
Slc22a23	0.445048883	6.60215E-05	Up	Subclustered_HDvCTL	Astrocyte	12ctx
Slc4a4	-0.46614792	7.26696E-11	Down	Subclustered_HDvCTL	Astrocyte	12ctx
Tmem243	0.307831496	0.021203176	Up	Subclustered_HDvCTL	Astrocyte	12ctx
Tspan7	-0.359322741	7.37953E-07	Down	Subclustered_HDvCTL	Astrocyte	12ctx
Ttyh1	-0.377618302	0.016978042	Down	Subclustered_HDvCTL	Astrocyte	12ctx
Acsl3	-0.56175399	8.15117E-09	Down	Subclustered_HDvCTL	Astrocyte	12ctx
Aldoc	-0.566421287	8.56849E-08	Down	Subclustered_HDvCTL	Astrocyte	12ctx
Aqp9	0.28729434	0.033234955	Up	Subclustered_HDvCTL	Astrocyte	12ctx
Arl3	0.331762148	0.024481346	Up	Subclustered_HDvCTL	Astrocyte	12ctx
Atp1b1	0.356495435	0.000891784	Up	Subclustered_HDvCTL	Astrocyte	12ctx
Bbs9	0.361466916	0.020509001	Up	Subclustered_HDvCTL	Astrocyte	12ctx
Cables1	-0.705055339	7.95125E-12	Down	Subclustered_HDvCTL	Astrocyte	12ctx
Camk2g	-0.385811783	0.00173305	Down	Subclustered_HDvCTL	Astrocyte	12ctx
Ciapin1	0.406024068	6.0724E-06	Up	Subclustered_HDvCTL	Astrocyte	12ctx
Cmtm5	-0.452013345	0.024042996	Down	Subclustered_HDvCTL	Astrocyte	12ctx
Efr3b	-0.343775906	0.00375469	Down	Subclustered_HDvCTL	Astrocyte	12ctx
Farp1	-0.690642118	1.73596E-24	Down	Subclustered_HDvCTL	Astrocyte	12ctx
Fry	-0.470351561	8.04889E-06	Down	Subclustered_HDvCTL	Astrocyte	12ctx
Gabbr1	-0.478515232	0.00026906	Down	Subclustered_HDvCTL	Astrocyte	12ctx
Glul	-0.494498435	2.86577E-07	Down	Subclustered_HDvCTL	Astrocyte	12ctx
Grin2c	-0.495467517	2.39175E-06	Down	Subclustered_HDvCTL	Astrocyte	12ctx
Hif3a	-0.661449828	8.489E-10	Down	Subclustered_HDvCTL	Astrocyte	12ctx
Htra1	-0.579599669	2.3797E-08	Down	Subclustered_HDvCTL	Astrocyte	12ctx
Mertk	-0.594007078	1.21629E-16	Down	Subclustered_HDvCTL	Astrocyte	12ctx
Mfge8	-0.411403712	0.03577661	Down	Subclustered_HDvCTL	Astrocyte	12ctx
Msi2	-0.283961564	8.78965E-10	Down	Subclustered_HDvCTL	Astrocyte	12ctx
Ntsr2	-0.389444217	0.002510778	Down	Subclustered_HDvCTL	Astrocyte	12ctx
Nwd1	-0.393681349	0.000336265	Down	Subclustered_HDvCTL	Astrocyte	12ctx
Palld	0.404917164	0.002798427	Up	Subclustered_HDvCTL	Astrocyte	12ctx
Paqr8	-0.445278219	0.001840743	Down	Subclustered_HDvCTL	Astrocyte	12ctx
Phkg1	-0.309090336	0.000274339	Down	Subclustered_HDvCTL	Astrocyte	12ctx
Pign	0.335259627	0.020287061	Up	Subclustered_HDvCTL	Astrocyte	12ctx
PISD	0.363649841	0.026819645	Up	Subclustered_HDvCTL	Astrocyte	12ctx
Plpp3	-0.346763414	1.53742E-06	Down	Subclustered_HDvCTL	Astrocyte	12ctx
Prex2	-0.301045938	0.000853589	Down	Subclustered_HDvCTL	Astrocyte	12ctx
Rapgef3	-0.41408665	0.012913058	Down	Subclustered_HDvCTL	Astrocyte	12ctx
Rmst	-0.480314237	0.004542107	Down	Subclustered_HDvCTL	Astrocyte	12ctx
Sparcl1	-0.393693047	4.55316E-08	Down	Subclustered_HDvCTL	Astrocyte	12ctx
Syne1	-0.312611389	0.045352419	Down	Subclustered_HDvCTL	Astrocyte	12ctx
Tnik	-0.261794372	0.019747707	Down	Subclustered_HDvCTL	Astrocyte	12ctx
Trip12	0.331690955	0.03424855	Up	Subclustered_HDvCTL	Astrocyte	12ctx
Ddx5	0.377244204	1.95867E-07	Up	Cluster_9	Astrocytes	8ctx
Tra2a	0.432698488	1.48682E-08	Up	Cluster_9	Astrocytes	8ctx
Ccdc58	0.307668928	0.018484372	Up	Cluster_9	Astrocytes	8ctx
Ogt	0.300759265	0.000668975	Up	Cluster_9	Astrocytes	8ctx
Polr2a	0.421172756	2.39505E-06	Up	Cluster_9	Astrocytes	8ctx
Grm3	-0.399322479	8.96625E-05	Down	Cluster_9	Astrocytes	8ctx
Lrrc4c	0.31622705	1.69668E-08	Up	Cluster_9	Astrocytes	8ctx
Auts2	-0.353236642	1.89209E-08	Down	Cluster_9	Astrocytes	8ctx
Rbfox1	-0.567495806	0.003631808	Down	Cluster_9	Astrocytes	8ctx
Rgs20	-0.27845799	0.00011282	Down	Cluster_9	Astrocytes	8ctx
Slc1a2	-0.318817737	2.5702E-09	Down	Cluster_9	Astrocytes	8ctx
Cul5	0.335129804	0.000281104	Up	Cluster_9	Astrocytes	8ctx
Frmd4a	-0.287058999	2.69034E-06	Down	Cluster_9	Astrocytes	8ctx
Phactr1	-0.475410368	8.94784E-07	Down	Cluster_9	Astrocytes	8ctx
Pitpnc1	-0.258005784	0.003194216	Down	Cluster_9	Astrocytes	8ctx
Abca1	0.257534682	0.044773531	Up	Cluster_9	Astrocytes	8ctx
Anks1b	-0.597486151	0.073592144	Down	Cluster_9	Astrocytes	8ctx
Cdh19	0.34712435	0.012225357	Up	Cluster_9	Astrocytes	8ctx
Fgf14	0.329711901	5.62202E-09	Up	Cluster_9	Astrocytes	8ctx
Gm3764	-0.352580081	2.26571E-16	Down	Cluster_9	Astrocytes	8ctx
Ptprj	0.374747289	1.95875E-06	Up	Cluster_9	Astrocytes	8ctx
Zfand6	0.290143689	0.040052079	Up	Cluster_9	Astrocytes	8ctx
1700112E06Rik	0.595785858	1.40438E-12	Up	Cluster_9	Astrocytes	8ctx
A830082K12Rik	0.309837225	0.004515163	Up	Cluster_9	Astrocytes	8ctx
Cspg5	-0.389286927	1.41486E-06	Down	Cluster_9	Astrocytes	8ctx
Diaph2	0.313093182	0.000425612	Up	Cluster_9	Astrocytes	8ctx
Dst	0.302312905	0.00210076	Up	Cluster_9	Astrocytes	8ctx
Fam13c	-0.388439479	1.40937E-05	Down	Cluster_9	Astrocytes	8ctx
Gm4876	0.413477004	1.38572E-06	Up	Cluster_9	Astrocytes	8ctx
Gpm6b	-0.257574747	9.18641E-06	Down	Cluster_9	Astrocytes	8ctx
Lrp1b	0.37126705	1.20946E-11	Up	Cluster_9	Astrocytes	8ctx
Qk	-0.2877335	1.25667E-08	Down	Cluster_9	Astrocytes	8ctx
Tspan7	-0.277037666	6.93032E-05	Down	Cluster_9	Astrocytes	8ctx
March7	0.260412014	0.007812116	Up	Cluster_9	Astrocytes	8ctx
9530026P05Rik	0.286403287	0.013517385	Up	Cluster_9	Astrocytes	8ctx
Acer3	0.291809044	0.075131242	Up	Cluster_9	Astrocytes	8ctx
Bcar3	0.295009446	0.001695033	Up	Cluster_9	Astrocytes	8ctx
Bmpr1a	0.268707483	0.034128719	Up	Cluster_9	Astrocytes	8ctx
Dctn4	0.285919282	0.004154112	Up	Cluster_9	Astrocytes	8ctx
Foxo1	0.310114465	0.005752329	Up	Cluster_9	Astrocytes	8ctx
Gm26843	-0.305141285	0.012155194	Down	Cluster_9	Astrocytes	8ctx
Klhl24	0.263488401	0.04582104	Up	Cluster_9	Astrocytes	8ctx
Lama3	-0.533971918	4.54906E-07	Down	Cluster_9	Astrocytes	8ctx
Phkg1	-0.254272936	0.084381403	Down	Cluster_9	Astrocytes	8ctx
Sfxn5	-0.254984182	0.008848945	Down	Cluster_9	Astrocytes	8ctx
Zfp949	0.45681563	7.59423E-11	Up	Cluster_9	Astrocytes	8ctx
Malat1	-0.767614361	2.21E-11	Down	Cluster_12	Cholinergic interneurons	12str
Sv2c	-0.682559617	0.090332131	Down	Cluster_12	Cholinergic interneurons	12str
Magi2	0.256432491	0.061323584	Up	Cluster_12	Cholinergic interneurons	12str
Scn9a	0.521247459	0.019292991	Up	Cluster_12	Cholinergic interneurons	12str
Csmd2	-0.474637328	0.033157021	Down	Cluster_12	Cholinergic interneurons	12str
Prima1	-0.681594181	0.00000316	Down	Cluster_12	Cholinergic interneurons	12str
Ptprs	-0.59316912	0.002062752	Down	Cluster_12	Cholinergic interneurons	12str
Acly	-0.512966546	0.007227361	Down	Cluster_12	Cholinergic interneurons	12str
Cldn34c1	-0.289671029	0.032041716	Down	Cluster_12	Cholinergic interneurons	12str
Slc7a14	-0.539252853	0.000418106	Down	Cluster_12	Cholinergic interneurons	12str
Syt1	-0.300964388	0.093493145	Down	Cluster_12	Cholinergic interneurons	12str
Malat1	-0.596332379	6.74544e-09	Down	Cluster_12	Cholinergic Interneurons	8str
Son	0.497546539	3.22187e-05	Up	Cluster_12	Cholinergic Interneurons	8str
Prima1	-0.514542751	0.000111286	Down	Cluster_12	Cholinergic Interneurons	8str
Rimbp2	-0.473721122	0.067046589	Down	Cluster_12	Cholinergic Interneurons	8str
Slc7a14	-0.55937915	0.006072901	Down	Cluster_12	Cholinergic Interneurons	8str
Malat1	-0.744079836	0	Down	Cluster_3v4	D1+ MSN	12str
Tpk1	0.336152882	2.3E-76	Up	Cluster_3v4	D1+ MSN	12str
Gm26835	-0.345999432	2.98E-111	Down	Cluster_3v4	D1+ MSN	12str
Guf1	0.40699379	1.34E-143	Up	Cluster_3v4	D1+ MSN	12str
Tra2a	0.329005619	1.55E-107	Up	Cluster_3v4	D1+ MSN	12str
Atad2b	0.372289968	1.41E-117	Up	Cluster_3v4	D1+ MSN	12str
Ccnl2	0.459019989	3.31E-198	Up	Cluster_3v4	D1+ MSN	12str
Crebzf	0.296548629	9.15E-84	Up	Cluster_3v4	D1+ MSN	12str
Dpyd	0.481352543	3.16E-92	Up	Cluster_3v4	D1+ MSN	12str
Edil3	0.419796674	6.21E-102	Up	Cluster_3v4	D1+ MSN	12str
Galnt18	-0.362717127	2.94E-109	Down	Cluster_3v4	D1+ MSN	12str
Ogt	0.375923101	3.59E-161	Up	Cluster_3v4	D1+ MSN	12str
Pde10a	-1.034093757	0	Down	Cluster_3v4	D1+ MSN	12str
Pdzd2	-0.924871802	0	Down	Cluster_3v4	D1+ MSN	12str
Phactr1	-0.703425538	0	Down	Cluster_3v4	D1+ MSN	12str
Polr2a	0.405989837	2.53E-122	Up	Cluster_3v4	D1+ MSN	12str
Rsrc1	0.317854046	1.36E-85	Up	Cluster_3v4	D1+ MSN	12str
Sv2c	-0.441205655	2.83E-140	Down	Cluster_3v4	D1+ MSN	12str
2010300C02Rik	-0.464606588	2.37E-206	Down	Cluster_3v4	D1+ MSN	12str
A230006K03Rik	0.543402402	2.85E-283	Up	Cluster_3v4	D1+ MSN	12str
Acyp2	0.357941871	1.6E-87	Up	Cluster_3v4	D1+ MSN	12str
Adcy5	-0.908949382	0	Down	Cluster_3v4	D1+ MSN	12str
Camk2d	0.359529655	3.75E-97	Up	Cluster_3v4	D1+ MSN	12str
Ccser1	0.279694643	2.62E-137	Up	Cluster_3v4	D1+ MSN	12str
Celf2	-0.397265085	0	Down	Cluster_3v4	D1+ MSN	12str
Cfap54	-0.519505371	1.55E-140	Down	Cluster_3v4	D1+ MSN	12str
Chuk	0.260984717	2.38E-62	Up	Cluster_3v4	D1+ MSN	12str
Ckb	-0.373535732	1.85E-111	Down	Cluster_3v4	D1+ MSN	12str
Ddx5	0.297603261	4.17E-111	Up	Cluster_3v4	D1+ MSN	12str
Fam155a	0.851647324	0	Up	Cluster_3v4	D1+ MSN	12str
Gm20754	0.438636283	2.88E-135	Up	Cluster_3v4	D1+ MSN	12str
Grik2	-0.302840112	7.21E-184	Down	Cluster_3v4	D1+ MSN	12str
Grip1	0.598888011	2.49E-296	Up	Cluster_3v4	D1+ MSN	12str
Kazn	-0.306934654	2.26E-93	Down	Cluster_3v4	D1+ MSN	12str
Kcnab1	-0.376895626	2E-172	Down	Cluster_3v4	D1+ MSN	12str
Kcnq1ot1	0.344579712	8.21E-152	Up	Cluster_3v4	D1+ MSN	12str
Magi2	0.298105309	1.59E-221	Up	Cluster_3v4	D1+ MSN	12str
Mapk4	-0.455912823	6.04E-100	Down	Cluster_3v4	D1+ MSN	12str
Meg3	0.450570873	0	Up	Cluster_3v4	D1+ MSN	12str
Nrg1	-0.414406823	7.57E-243	Down	Cluster_3v4	D1+ MSN	12str
Pafah1b1	0.376176141	3.45E-150	Up	Cluster_3v4	D1+ MSN	12str
Pde1c	-0.831800746	1.77E-185	Down	Cluster_3v4	D1+ MSN	12str
Pde2a	-0.633545613	0	Down	Cluster_3v4	D1+ MSN	12str
Plcb1	-0.343130148	1.04E-185	Down	Cluster_3v4	D1+ MSN	12str
Ryr3	-0.337695869	2.21E-175	Down	Cluster_3v4	D1+ MSN	12str
Sfmbt2	0.577380548	0	Up	Cluster_3v4	D1+ MSN	12str
Trpm3	-0.275238222	6.46E-12	Down	Cluster_3v4	D1+ MSN	12str
2210408I21Rik	0.327167137	5.2E-69	Up	Cluster_3v4	D1+ MSN	12str
9630028H03Rik	-0.506523497	3.34E-128	Down	Cluster_3v4	D1+ MSN	12str
A330015K06Rik	-0.463642574	4.86E-162	Down	Cluster_3v4	D1+ MSN	12str
A930015D03Rik	0.266719707	3.77E-58	Up	Cluster_3v4	D1+ MSN	12str
Adgrb1	-0.311003519	5.68E-90	Down	Cluster_3v4	D1+ MSN	12str
Ank2	0.250970575	2.04E-130	Up	Cluster_3v4	D1+ MSN	12str
Arid5b	0.503831838	3.51E-147	Up	Cluster_3v4	D1+ MSN	12str
Baiap2	-0.492977329	1.22E-259	Down	Cluster_3v4	D1+ MSN	12str
Brinp3	0.468916613	3.99E-73	Up	Cluster_3v4	D1+ MSN	12str
Cacna2d3	-0.497211752	0	Down	Cluster_3v4	D1+ MSN	12str
Cacnb2	-0.566640063	1.14E-202	Down	Cluster_3v4	D1+ MSN	12str
Camk2a	-0.341376551	7.68E-150	Down	Cluster_3v4	D1+ MSN	12str
Camk2b	-0.590871622	0	Down	Cluster_3v4	D1+ MSN	12str
Ccdc58	0.366127722	1.92E-104	Up	Cluster_3v4	D1+ MSN	12str
Cdh13	-0.295295147	4.06E-22	Down	Cluster_3v4	D1+ MSN	12str
Cnksr2	-0.312677516	1.89E-121	Down	Cluster_3v4	D1+ MSN	12str
Cntn6	0.298071829	6.31E-64	Up	Cluster_3v4	D1+ MSN	12str
Dclk1	-0.28861311	1.11E-100	Down	Cluster_3v4	D1+ MSN	12str
Dmd	0.350857196	2.83E-145	Up	Cluster_3v4	D1+ MSN	12str
Erc2	-0.373862823	1.28E-270	Down	Cluster_3v4	D1+ MSN	12str
Frmd4a	0.416137026	1.77E-215	Up	Cluster_3v4	D1+ MSN	12str
Gabra2	0.359390451	2.7E-132	Up	Cluster_3v4	D1+ MSN	12str
Gm13052	-0.452688374	2.18E-159	Down	Cluster_3v4	D1+ MSN	12str
Gm15810	-0.540874746	4.51E-224	Down	Cluster_3v4	D1+ MSN	12str
Gm21954	-0.370702993	4.16E-128	Down	Cluster_3v4	D1+ MSN	12str
Gm30382	0.408824919	3.98E-79	Up	Cluster_3v4	D1+ MSN	12str
Gng7	-0.453658243	1.44E-231	Down	Cluster_3v4	D1+ MSN	12str
Inf2	-0.736570995	0	Down	Cluster_3v4	D1+ MSN	12str
Itga9	-0.380474661	2.45E-90	Down	Cluster_3v4	D1+ MSN	12str
Kcnip3	-0.498953929	3.34E-184	Down	Cluster_3v4	D1+ MSN	12str
Kcnq3	-0.353639792	3.14E-131	Down	Cluster_3v4	D1+ MSN	12str
Kif21a	0.264777866	3.53E-81	Up	Cluster_3v4	D1+ MSN	12str
Lsamp	0.340169008	1.82E-222	Up	Cluster_3v4	D1+ MSN	12str
Mgat4c	0.722216964	0	Up	Cluster_3v4	D1+ MSN	12str
Nav3	0.302551675	1.77E-126	Up	Cluster_3v4	D1+ MSN	12str
Ncor1	0.270135357	7.15E-80	Up	Cluster_3v4	D1+ MSN	12str
Neto1	-0.253204341	2.51E-57	Down	Cluster_3v4	D1+ MSN	12str
Nr6a1	0.397414159	2.47E-140	Up	Cluster_3v4	D1+ MSN	12str
Nrxn1	0.319386181	5.88E-270	Up	Cluster_3v4	D1+ MSN	12str
Osbpl8	-0.498551112	4.48E-219	Down	Cluster_3v4	D1+ MSN	12str
Pcsk2	-0.390314884	4.06E-167	Down	Cluster_3v4	D1+ MSN	12str
Pde7b	-0.571233764	3.45E-240	Down	Cluster_3v4	D1+ MSN	12str
Pitpnm2	-0.463423381	6.14E-150	Down	Cluster_3v4	D1+ MSN	12str
Pla2g3	-0.317214409	6.73E-102	Down	Cluster_3v4	D1+ MSN	12str
Ppp1r16b	-0.434941017	1.9E-121	Down	Cluster_3v4	D1+ MSN	12str
Prickle2	0.380390892	1.31E-135	Up	Cluster_3v4	D1+ MSN	12str
Ptk2b	-0.317796207	6.44E-97	Down	Cluster_3v4	D1+ MSN	12str
Ptpn5	-0.414460963	1.73E-145	Down	Cluster_3v4	D1+ MSN	12str
Ranbp17	0.336107258	3.43E-96	Up	Cluster_3v4	D1+ MSN	12str
Rap1gap	-0.572577401	2.99E-283	Down	Cluster_3v4	D1+ MSN	12str
Rbfox1	-0.321462424	1.19E-198	Down	Cluster_3v4	D1+ MSN	12str
Rcan2	-0.281004988	2.09E-71	Down	Cluster_3v4	D1+ MSN	12str
Rgs9	-0.957481063	0	Down	Cluster_3v4	D1+ MSN	12str
Ryr1	-0.52112709	1.06E-254	Down	Cluster_3v4	D1+ MSN	12str
Scaper	0.400382279	1.29E-156	Up	Cluster_3v4	D1+ MSN	12str
Scn9a	0.413027181	2.74E-132	Up	Cluster_3v4	D1+ MSN	12str
Sema6d	0.310664355	7.13E-90	Up	Cluster_3v4	D1+ MSN	12str
Sgk1	-0.520470818	1.96E-166	Down	Cluster_3v4	D1+ MSN	12str
Slc24a2	-0.327319462	3.56E-78	Down	Cluster_3v4	D1+ MSN	12str
Slc4a4	-0.512435785	1.33E-264	Down	Cluster_3v4	D1+ MSN	12str
Sobp	0.472627523	1.54E-136	Up	Cluster_3v4	D1+ MSN	12str
Sorbs1	-0.311620622	6.05E-75	Down	Cluster_3v4	D1+ MSN	12str
Strn3	0.284503642	7.92E-92	Up	Cluster_3v4	D1+ MSN	12str
Stxbp6	0.271127156	1.78E-41	Up	Cluster_3v4	D1+ MSN	12str
Taf15	0.295894953	5.15E-81	Up	Cluster_3v4	D1+ MSN	12str
Tmem117	0.392382148	7.77E-139	Up	Cluster_3v4	D1+ MSN	12str
Tmem191c	-0.420756113	1.18E-171	Down	Cluster_3v4	D1+ MSN	12str
Tmod1	-0.590067561	1.08E-289	Down	Cluster_3v4	D1+ MSN	12str
Zdhhc14	-0.296295975	6.27E-42	Down	Cluster_3v4	D1+ MSN	12str
Zswim6	-0.441355162	4.42E-134	Down	Cluster_3v4	D1+ MSN	12str
2410089E03Rik	0.254604937	3.23E-69	Up	Cluster_3v4	D1+ MSN	12str
4930448N21Rik	-0.335521745	9.3E-130	Down	Cluster_3v4	D1+ MSN	12str
4930578G10Rik	-0.366016693	2.1E-111	Down	Cluster_3v4	D1+ MSN	12str
5330417C22Rik	-0.416009579	8.15E-157	Down	Cluster_3v4	D1+ MSN	12str
A330008L17Rik	-0.428272853	1.62E-83	Down	Cluster_3v4	D1+ MSN	12str
Adam12	-0.351531327	1.6E-56	Down	Cluster_3v4	D1+ MSN	12str
Adarb2	0.451955379	9.37E-62	Up	Cluster_3v4	D1+ MSN	12str
Agbl4	0.529613573	6.04E-224	Up	Cluster_3v4	D1+ MSN	12str
Anks1b	-0.366950429	0	Down	Cluster_3v4	D1+ MSN	12str
Apc	0.308302784	2.54E-123	Up	Cluster_3v4	D1+ MSN	12str
Atp2b2	-0.28620345	5.58E-118	Down	Cluster_3v4	D1+ MSN	12str
Baz2b	0.275597182	1.1E-76	Up	Cluster_3v4	D1+ MSN	12str
Bbx	0.289269408	4.76E-73	Up	Cluster_3v4	D1+ MSN	12str
Cacna1e	-0.288570334	6.53E-130	Down	Cluster_3v4	D1+ MSN	12str
Cacng4	-0.362110779	9.42E-105	Down	Cluster_3v4	D1+ MSN	12str
Camk4	-0.560575042	2.69E-260	Down	Cluster_3v4	D1+ MSN	12str
Camkv	-0.511754864	3.97E-231	Down	Cluster_3v4	D1+ MSN	12str
Car11	-0.367380236	1.55E-123	Down	Cluster_3v4	D1+ MSN	12str
Ccdc85a	0.324011904	4.51E-71	Up	Cluster_3v4	D1+ MSN	12str
Ccdc88c	-0.33972526	4.87E-94	Down	Cluster_3v4	D1+ MSN	12str
Cdh18	0.706197794	2.24E-283	Up	Cluster_3v4	D1+ MSN	12str
Clasp2	0.254146046	3.61E-72	Up	Cluster_3v4	D1+ MSN	12str
Cpne5	-0.338956207	3.21E-118	Down	Cluster_3v4	D1+ MSN	12str
Crebbp	0.253905512	1.9E-73	Up	Cluster_3v4	D1+ MSN	12str
Dennd1a	0.250654074	1.46E-103	Up	Cluster_3v4	D1+ MSN	12str
Dfna5	-0.261191095	3.35E-41	Down	Cluster_3v4	D1+ MSN	12str
Dgkb	-0.392576436	5.73E-244	Down	Cluster_3v4	D1+ MSN	12str
Dlc1	0.385051361	1.34E-91	Up	Cluster_3v4	D1+ MSN	12str
Dpp10	-0.338690572	3.54E-40	Down	Cluster_3v4	D1+ MSN	12str
Dscam	0.315114541	2.85E-38	Up	Cluster_3v4	D1+ MSN	12str
Eml6	0.289319359	9.08E-88	Up	Cluster_3v4	D1+ MSN	12str
Enah	0.448445355	1.65E-171	Up	Cluster_3v4	D1+ MSN	12str
Exoc6b	0.320169494	1.47E-109	Up	Cluster_3v4	D1+ MSN	12str
Fgd4	0.268629772	2.19E-59	Up	Cluster_3v4	D1+ MSN	12str
Fmnl2	0.489361665	6.35E-173	Up	Cluster_3v4	D1+ MSN	12str
Foxn3	0.285177573	1.46E-67	Up	Cluster_3v4	D1+ MSN	12str
Fstl4	-0.444023791	3.73E-160	Down	Cluster_3v4	D1+ MSN	12str
Fstl5	0.35767325	1.55E-86	Up	Cluster_3v4	D1+ MSN	12str
Gbf1	0.347841073	4.65E-114	Up	Cluster_3v4	D1+ MSN	12str
Gdpd5	-0.256460429	1.29E-75	Down	Cluster_3v4	D1+ MSN	12str
Gigyf2	0.253218804	6.97E-54	Up	Cluster_3v4	D1+ MSN	12str
Gm10848	-0.454178062	2.59E-130	Down	Cluster_3v4	D1+ MSN	12str
Gm13974	-0.266536156	2.86E-52	Down	Cluster_3v4	D1+ MSN	12str
Gm27247	-0.474714758	1.28E-84	Down	Cluster_3v4	D1+ MSN	12str
Gm28494	-0.285294935	8.07E-79	Down	Cluster_3v4	D1+ MSN	12str
Gm28609	-0.261458247	2.9E-78	Down	Cluster_3v4	D1+ MSN	12str
Gmds	0.44614607	6.18E-165	Up	Cluster_3v4	D1+ MSN	12str
Gnaq	0.266769433	1.33E-73	Up	Cluster_3v4	D1+ MSN	12str
Gpc6	0.501382897	4.17E-124	Up	Cluster_3v4	D1+ MSN	12str
Gpm6a	0.279119698	7.75E-89	Up	Cluster_3v4	D1+ MSN	12str
Gpm6b	-0.443486745	4.5E-156	Down	Cluster_3v4	D1+ MSN	12str
Gprin3	-0.308929364	1.44E-55	Down	Cluster_3v4	D1+ MSN	12str
Grin2a	-0.257628823	4.16E-75	Down	Cluster_3v4	D1+ MSN	12str
Grm1	-0.466297928	6.3E-145	Down	Cluster_3v4	D1+ MSN	12str
Grm3	-0.433539562	8.27E-111	Down	Cluster_3v4	D1+ MSN	12str
Gsg1l	-0.91182762	0	Down	Cluster_3v4	D1+ MSN	12str
Gtdc1	0.285168879	2.53E-59	Up	Cluster_3v4	D1+ MSN	12str
Htr4	-0.459122226	1.15E-36	Down	Cluster_3v4	D1+ MSN	12str
Igsf21	-0.317732927	5.2E-166	Down	Cluster_3v4	D1+ MSN	12str
Ivns1abp	-0.259373503	7.39E-39	Down	Cluster_3v4	D1+ MSN	12str
Jakmip1	-0.312860951	3.51E-112	Down	Cluster_3v4	D1+ MSN	12str
Kcnh1	-0.255984208	1.69E-38	Down	Cluster_3v4	D1+ MSN	12str
Kcnh3	-0.340035938	3.74E-139	Down	Cluster_3v4	D1+ MSN	12str
Kcnip2	-0.537177029	3.11E-237	Down	Cluster_3v4	D1+ MSN	12str
Kcnk2	-0.291589428	1.71E-24	Down	Cluster_3v4	D1+ MSN	12str
Kcnq5	-0.320757926	1.03E-208	Down	Cluster_3v4	D1+ MSN	12str
Klf12	0.400428649	1.57E-116	Up	Cluster_3v4	D1+ MSN	12str
Klhl2	-0.289444845	5.81E-64	Down	Cluster_3v4	D1+ MSN	12str
Ldlrad4	-0.437160622	1.43E-61	Down	Cluster_3v4	D1+ MSN	12str
Lrrk2	-0.537745133	3.22E-180	Down	Cluster_3v4	D1+ MSN	12str
Lrtm1	-0.448779379	2.86E-141	Down	Cluster_3v4	D1+ MSN	12str
Mast2	0.292367774	2.31E-70	Up	Cluster_3v4	D1+ MSN	12str
Meis1	0.43992878	4.81E-115	Up	Cluster_3v4	D1+ MSN	12str
Mpp7	-0.697079521	5.04E-298	Down	Cluster_3v4	D1+ MSN	12str
Mtcl1	-0.327445222	7.11E-81	Down	Cluster_3v4	D1+ MSN	12str
Ndrg4	-0.422973635	5.92E-162	Down	Cluster_3v4	D1+ MSN	12str
Ngef	-0.308025045	3.22E-84	Down	Cluster_3v4	D1+ MSN	12str
Nnat	-0.259257186	2.56E-34	Down	Cluster_3v4	D1+ MSN	12str
Npas2	-0.769665664	0	Down	Cluster_3v4	D1+ MSN	12str
Npas3	0.398244396	7.79E-107	Up	Cluster_3v4	D1+ MSN	12str
Osbp2	-0.274232523	4.94E-59	Down	Cluster_3v4	D1+ MSN	12str
Parp8	0.27923927	2.16E-62	Up	Cluster_3v4	D1+ MSN	12str
Pcdh10	0.273884638	7.94E-58	Up	Cluster_3v4	D1+ MSN	12str
Pde1b	-0.503021209	2.8E-222	Down	Cluster_3v4	D1+ MSN	12str
Pde4a	-0.39439936	1.61E-126	Down	Cluster_3v4	D1+ MSN	12str
Pde4d	0.48665091	6.33E-90	Up	Cluster_3v4	D1+ MSN	12str
Peli2	-0.407565651	1.81E-125	Down	Cluster_3v4	D1+ MSN	12str
Pmepa1	-0.3995326	2.89E-118	Down	Cluster_3v4	D1+ MSN	12str
Ppfia2	0.306942754	2.02E-115	Up	Cluster_3v4	D1+ MSN	12str
Ppp1r2	-0.371906874	1.84E-66	Down	Cluster_3v4	D1+ MSN	12str
Ppp2r3a	0.417621565	7.18E-132	Up	Cluster_3v4	D1+ MSN	12str
Ppp3ca	-0.420398262	0	Down	Cluster_3v4	D1+ MSN	12str
Prkcb	-0.535063325	0	Down	Cluster_3v4	D1+ MSN	12str
Ptprz1	0.339815693	5.99E-62	Up	Cluster_3v4	D1+ MSN	12str
Rap1gapos	-0.336264301	8.71E-160	Down	Cluster_3v4	D1+ MSN	12str
Rerg	-0.258889648	3.45E-43	Down	Cluster_3v4	D1+ MSN	12str
Rgs20	-0.29562816	1.06E-46	Down	Cluster_3v4	D1+ MSN	12str
Rgs7bp	-0.271960452	6.5E-72	Down	Cluster_3v4	D1+ MSN	12str
Ror1	-0.833569118	1.08E-260	Down	Cluster_3v4	D1+ MSN	12str
Rufy3	0.27813105	8.47E-72	Up	Cluster_3v4	D1+ MSN	12str
Sec14l1	-0.393384174	1.39E-136	Down	Cluster_3v4	D1+ MSN	12str
Sema3a	0.260536371	2.32E-47	Up	Cluster_3v4	D1+ MSN	12str
Sema5b	-0.367983937	1.06E-68	Down	Cluster_3v4	D1+ MSN	12str
Sez6	-0.553082952	1E-210	Down	Cluster_3v4	D1+ MSN	12str
Sgk3	-0.344661987	2.1E-95	Down	Cluster_3v4	D1+ MSN	12str
Slc35f3	-0.294283251	4.06E-73	Down	Cluster_3v4	D1+ MSN	12str
Snrnp70	0.274028941	6.31E-102	Up	Cluster_3v4	D1+ MSN	12str
Sorcs2	-0.53159393	2.09E-102	Down	Cluster_3v4	D1+ MSN	12str
Sos2	0.288802973	9.25E-67	Up	Cluster_3v4	D1+ MSN	12str
Spata7	0.308675262	3.41E-79	Up	Cluster_3v4	D1+ MSN	12str
Spock3	-0.393973176	4.54E-127	Down	Cluster_3v4	D1+ MSN	12str
Srgap2	0.256527748	1.06E-56	Up	Cluster_3v4	D1+ MSN	12str
Ssbp4	-0.328018563	4.42E-99	Down	Cluster_3v4	D1+ MSN	12str
Stk32a	-0.364992043	2.04E-88	Down	Cluster_3v4	D1+ MSN	12str
Tcf4	0.299122133	2.12E-66	Up	Cluster_3v4	D1+ MSN	12str
Tenm3	0.454855058	1.75E-125	Up	Cluster_3v4	D1+ MSN	12str
Thsd7a	-0.315933495	3.05E-66	Down	Cluster_3v4	D1+ MSN	12str
Tnrc6b	0.273406542	2.98E-92	Up	Cluster_3v4	D1+ MSN	12str
Unc13b	0.30938016	1.36E-75	Up	Cluster_3v4	D1+ MSN	12str
Unc13c	-0.422025198	2.39E-93	Down	Cluster_3v4	D1+ MSN	12str
Usp34	0.258321278	1.65E-84	Up	Cluster_3v4	D1+ MSN	12str
Vat1l	-0.250243654	3.61E-22	Down	Cluster_3v4	D1+ MSN	12str
Vsnl1	0.437237143	5.47E-133	Up	Cluster_3v4	D1+ MSN	12str
Zfhx4	0.342318107	1.13E-91	Up	Cluster_3v4	D1+ MSN	12str
Zfp608	0.277751636	1.45E-55	Up	Cluster_3v4	D1+ MSN	12str
Zfyve28	-0.430494853	3.96E-171	Down	Cluster_3v4	D1+ MSN	12str
Zmynd8	-0.361063328	9.08E-114	Down	Cluster_3v4	D1+ MSN	12str
0610043K17Rik	0.251608996	7.45E-47	Up	Cluster_3v4	D1+ MSN	12str
2610037D02Rik	0.291551547	9.44E-67	Up	Cluster_3v4	D1+ MSN	12str
2900055J20Rik	-0.284684521	3.42E-77	Down	Cluster_3v4	D1+ MSN	12str
4930555F03Rik	0.437815593	4.9E-101	Up	Cluster_3v4	D1+ MSN	12str
A330102I10Rik	0.302766913	3.26E-75	Up	Cluster_3v4	D1+ MSN	12str
Abhd2	-0.259126796	2.71E-57	Down	Cluster_3v4	D1+ MSN	12str
Ablim1	0.256333727	2.73E-52	Up	Cluster_3v4	D1+ MSN	12str
Actn2	-0.353264889	1.02E-93	Down	Cluster_3v4	D1+ MSN	12str
Acvr1c	-0.360992564	7.31E-94	Down	Cluster_3v4	D1+ MSN	12str
Adamts6	0.30633658	5.32E-82	Up	Cluster_3v4	D1+ MSN	12str
Agfg2	-0.260420264	2.13E-65	Down	Cluster_3v4	D1+ MSN	12str
Agk	0.273331535	1.81E-59	Up	Cluster_3v4	D1+ MSN	12str
Ankrd12	0.30996959	3.28E-91	Up	Cluster_3v4	D1+ MSN	12str
Ano2	-0.38400409	4.93E-97	Down	Cluster_3v4	D1+ MSN	12str
Ano3	-0.299718125	6.52E-76	Down	Cluster_3v4	D1+ MSN	12str
Arhgap10	-0.506614795	6.46E-245	Down	Cluster_3v4	D1+ MSN	12str
Arhgap33	-0.310133676	7.49E-101	Down	Cluster_3v4	D1+ MSN	12str
Atf6	-0.387392814	1.51E-112	Down	Cluster_3v4	D1+ MSN	12str
Atp2b1	-0.456046254	2.23E-233	Down	Cluster_3v4	D1+ MSN	12str
Basp1	0.304912268	9.76E-73	Up	Cluster_3v4	D1+ MSN	12str
Bcl11b	-0.273215519	3.6E-69	Down	Cluster_3v4	D1+ MSN	12str
Bcr	-0.363645767	9.76E-125	Down	Cluster_3v4	D1+ MSN	12str
Bicd1	0.333633543	4.38E-109	Up	Cluster_3v4	D1+ MSN	12str
C2cd2	-0.358851069	1.28E-80	Down	Cluster_3v4	D1+ MSN	12str
Camk1d	-0.343019502	5.89E-129	Down	Cluster_3v4	D1+ MSN	12str
Camkk2	-0.347890348	9.5E-101	Down	Cluster_3v4	D1+ MSN	12str
Car12	-0.490914132	6.43E-201	Down	Cluster_3v4	D1+ MSN	12str
Ccm2	-0.290150618	4.57E-60	Down	Cluster_3v4	D1+ MSN	12str
Ccnl1	0.251785232	1.45E-61	Up	Cluster_3v4	D1+ MSN	12str
Cdh10	0.25041289	6.6E-51	Up	Cluster_3v4	D1+ MSN	12str
Cdh12	0.354422323	4.53E-62	Up	Cluster_3v4	D1+ MSN	12str
Cdh4	-0.506549142	2.38E-64	Down	Cluster_3v4	D1+ MSN	12str
Cdk14	0.454236812	6.83E-145	Up	Cluster_3v4	D1+ MSN	12str
Cep164	0.329492109	1.06E-97	Up	Cluster_3v4	D1+ MSN	12str
Chd3	0.272840827	1.51E-63	Up	Cluster_3v4	D1+ MSN	12str
Chn1	-0.361745834	4.16E-136	Down	Cluster_3v4	D1+ MSN	12str
Cnr1	-0.543450611	3.17E-80	Down	Cluster_3v4	D1+ MSN	12str
Cntn5	-0.374916088	2.92E-40	Down	Cluster_3v4	D1+ MSN	12str
Crocc	-0.398121821	1.29E-148	Down	Cluster_3v4	D1+ MSN	12str
Csf2ra	0.295000556	8.96E-70	Up	Cluster_3v4	D1+ MSN	12str
Cyld	-0.25277185	3.8E-68	Down	Cluster_3v4	D1+ MSN	12str
D030068K23Rik	0.437099201	1.27E-119	Up	Cluster_3v4	D1+ MSN	12str
Dennd1b	0.264911163	1.67E-56	Up	Cluster_3v4	D1+ MSN	12str
Dgkz	-0.273616285	7.69E-61	Down	Cluster_3v4	D1+ MSN	12str
Dlgap3	-0.315569642	4.99E-84	Down	Cluster_3v4	D1+ MSN	12str
Dnajc6	0.252318756	1.88E-56	Up	Cluster_3v4	D1+ MSN	12str
Dpy19l3	-0.330964043	4.29E-94	Down	Cluster_3v4	D1+ MSN	12str
Drd1	-0.394127532	6.1E-149	Down	Cluster_3v4	D1+ MSN	12str
Ebf1	0.686412897	6.08E-169	Up	Cluster_3v4	D1+ MSN	12str
Efna5	0.383727468	9.28E-78	Up	Cluster_3v4	D1+ MSN	12str
Ehbp1	0.26136174	3.92E-68	Up	Cluster_3v4	D1+ MSN	12str
Eif4g3	0.337859019	2.48E-109	Up	Cluster_3v4	D1+ MSN	12str
Elmod1	-0.276594658	2.59E-99	Down	Cluster_3v4	D1+ MSN	12str
Epb41l4b	0.320719635	8.79E-98	Up	Cluster_3v4	D1+ MSN	12str
Epha10	-0.264456042	3.74E-75	Down	Cluster_3v4	D1+ MSN	12str
Fam126a	0.367461265	7.45E-86	Up	Cluster_3v4	D1+ MSN	12str
Fam172a	0.269406187	4.66E-71	Up	Cluster_3v4	D1+ MSN	12str
Fam184b	-0.405768355	9.7E-123	Down	Cluster_3v4	D1+ MSN	12str
Fam193a	0.264357859	8.62E-66	Up	Cluster_3v4	D1+ MSN	12str
Fam196b	0.314213282	1.21E-106	Up	Cluster_3v4	D1+ MSN	12str
Foxo1	-0.329449424	4.05E-60	Down	Cluster_3v4	D1+ MSN	12str
Frmd4b	-0.252533423	1.25E-20	Down	Cluster_3v4	D1+ MSN	12str
Gabrd	-0.464466805	1.11E-190	Down	Cluster_3v4	D1+ MSN	12str
Gli3	-0.412016846	5.42E-95	Down	Cluster_3v4	D1+ MSN	12str
Gm10419	-0.273596323	1.37E-73	Down	Cluster_3v4	D1+ MSN	12str
Gm1043	-0.342682456	3.83E-100	Down	Cluster_3v4	D1+ MSN	12str
Gm13269	-0.431318276	2.86E-102	Down	Cluster_3v4	D1+ MSN	12str
Gm15813	-0.259076894	1.84E-88	Down	Cluster_3v4	D1+ MSN	12str
Gm21092	0.350864124	1.29E-135	Up	Cluster_3v4	D1+ MSN	12str
Gm26883	0.277291109	4.31E-17	Up	Cluster_3v4	D1+ MSN	12str
Gm28905	-0.49261723	1.87E-156	Down	Cluster_3v4	D1+ MSN	12str
Gnb5	-0.310744808	4.97E-78	Down	Cluster_3v4	D1+ MSN	12str
Hecw2	-0.256138985	9.4E-88	Down	Cluster_3v4	D1+ MSN	12str
Hivep3	0.257095116	7.9E-62	Up	Cluster_3v4	D1+ MSN	12str
Homer1	-0.456415276	3.37E-155	Down	Cluster_3v4	D1+ MSN	12str
Hpca	-0.276022503	2.46E-83	Down	Cluster_3v4	D1+ MSN	12str
Htr2c	0.278616978	1.62E-35	Up	Cluster_3v4	D1+ MSN	12str
Icam5	-0.320229741	9.81E-116	Down	Cluster_3v4	D1+ MSN	12str
Iqgap2	-0.301215321	6.22E-73	Down	Cluster_3v4	D1+ MSN	12str
Irf2	0.306668269	8.13E-76	Up	Cluster_3v4	D1+ MSN	12str
Itga5	-0.275552681	6.44E-93	Down	Cluster_3v4	D1+ MSN	12str
Itpka	-0.399023438	4.28E-159	Down	Cluster_3v4	D1+ MSN	12str
Itpr1	-0.546093432	0	Down	Cluster_3v4	D1+ MSN	12str
Kansl1	0.258369335	1.62E-88	Up	Cluster_3v4	D1+ MSN	12str
Kcnh4	-0.462583143	3.16E-239	Down	Cluster_3v4	D1+ MSN	12str
Kcnt2	0.302150215	6.3E-57	Up	Cluster_3v4	D1+ MSN	12str
Khdrbs2	0.28773988	3.91E-83	Up	Cluster_3v4	D1+ MSN	12str
Klhdc10	0.309302332	7.54E-87	Up	Cluster_3v4	D1+ MSN	12str
Leng8	0.296045689	1.4E-73	Up	Cluster_3v4	D1+ MSN	12str
Lims1	0.289574578	1.04E-65	Up	Cluster_3v4	D1+ MSN	12str
Lin28b	0.253678645	1.13E-49	Up	Cluster_3v4	D1+ MSN	12str
Lpp	0.585322931	8.86E-260	Up	Cluster_3v4	D1+ MSN	12str
Lrfn5	0.282939022	2.62E-144	Up	Cluster_3v4	D1+ MSN	12str
Lynx1	-0.283353042	1.9E-108	Down	Cluster_3v4	D1+ MSN	12str
Lzts3	-0.327101727	1.56E-95	Down	Cluster_3v4	D1+ MSN	12str
Magi1	0.290135292	3.18E-69	Up	Cluster_3v4	D1+ MSN	12str
Magi3	0.270765756	1.31E-50	Up	Cluster_3v4	D1+ MSN	12str
Mdk	-0.49708457	4.46E-216	Down	Cluster_3v4	D1+ MSN	12str
Mhrt	-0.646714609	5.8E-228	Down	Cluster_3v4	D1+ MSN	12str
Mnat1	0.267594199	5.28E-61	Up	Cluster_3v4	D1+ MSN	12str
Myo3b	-0.27528865	1.33E-34	Down	Cluster_3v4	D1+ MSN	12str
Myt1l	-0.258396484	1.1E-127	Down	Cluster_3v4	D1+ MSN	12str
Necab2	-0.314558714	3.33E-91	Down	Cluster_3v4	D1+ MSN	12str
Neto2	-0.347620156	7.81E-67	Down	Cluster_3v4	D1+ MSN	12str
Nfyc	0.27109019	2.44E-60	Up	Cluster_3v4	D1+ MSN	12str
Nin	-0.378761758	6.62E-136	Down	Cluster_3v4	D1+ MSN	12str
Nrg3	0.257555464	7.8E-87	Up	Cluster_3v4	D1+ MSN	12str
Nsun7	0.381975686	1.66E-125	Up	Cluster_3v4	D1+ MSN	12str
Nyap2	0.304851137	4.74E-100	Up	Cluster_3v4	D1+ MSN	12str
Olfm3	0.349693699	1.03E-105	Up	Cluster_3v4	D1+ MSN	12str
P4ha1	-0.268629485	1.34E-34	Down	Cluster_3v4	D1+ MSN	12str
Pcdh19	0.293775163	1.86E-76	Up	Cluster_3v4	D1+ MSN	12str
Pde1a	0.308844169	6.78E-74	Up	Cluster_3v4	D1+ MSN	12str
Pde8b	-0.261459238	6.49E-53	Down	Cluster_3v4	D1+ MSN	12str
Pdss2	0.30264742	1.32E-69	Up	Cluster_3v4	D1+ MSN	12str
Pid1	0.303170631	6.13E-64	Up	Cluster_3v4	D1+ MSN	12str
Pik3c2b	-0.273198841	2.99E-66	Down	Cluster_3v4	D1+ MSN	12str
Pnn	0.256753449	4.31E-54	Up	Cluster_3v4	D1+ MSN	12str
Pou6f2	0.421427377	1.06E-85	Up	Cluster_3v4	D1+ MSN	12str
Ppp1r1a	-0.397292489	4.76E-144	Down	Cluster_3v4	D1+ MSN	12str
Ppp1r1b	-0.331999448	2.58E-110	Down	Cluster_3v4	D1+ MSN	12str
Ppp4r4	-0.486222147	3.99E-185	Down	Cluster_3v4	D1+ MSN	12str
Pura	0.267623683	2.78E-59	Up	Cluster_3v4	D1+ MSN	12str
Rab40b	-0.287683202	3.31E-72	Down	Cluster_3v4	D1+ MSN	12str
Rarb	-0.350932334	2.02E-130	Down	Cluster_3v4	D1+ MSN	12str
Rasd2	-0.271623078	3.28E-103	Down	Cluster_3v4	D1+ MSN	12str
Rasgef1a	-0.370895692	1.96E-137	Down	Cluster_3v4	D1+ MSN	12str
Rasgrp2	-0.507799624	1.6E-223	Down	Cluster_3v4	D1+ MSN	12str
Rbm5	0.271406815	2.38E-65	Up	Cluster_3v4	D1+ MSN	12str
Rgs11	-0.343669935	2.94E-175	Down	Cluster_3v4	D1+ MSN	12str
Rhobtb2	-0.384397152	1.32E-119	Down	Cluster_3v4	D1+ MSN	12str
Rnf112	-0.347929642	1.13E-102	Down	Cluster_3v4	D1+ MSN	12str
Rnf144a	-0.416825039	1.43E-141	Down	Cluster_3v4	D1+ MSN	12str
RP23-231J2.1	0.575723436	7.95E-130	Up	Cluster_3v4	D1+ MSN	12str
RP24-134N2.1	-0.293500103	3.56E-109	Down	Cluster_3v4	D1+ MSN	12str
Rsrp1	0.272342724	3.77E-92	Up	Cluster_3v4	D1+ MSN	12str
Rtn3	0.276862309	8.32E-96	Up	Cluster_3v4	D1+ MSN	12str
Runx2	0.258555673	2.67E-50	Up	Cluster_3v4	D1+ MSN	12str
Scn4b	-0.50972687	3.45E-276	Down	Cluster_3v4	D1+ MSN	12str
Senp6	0.259880693	2.61E-65	Up	Cluster_3v4	D1+ MSN	12str
Sh3rf2	-0.402120464	2.57E-103	Down	Cluster_3v4	D1+ MSN	12str
Slc24a3	0.448092293	4.23E-125	Up	Cluster_3v4	D1+ MSN	12str
Slc24a4	-0.528677833	1.76E-173	Down	Cluster_3v4	D1+ MSN	12str
Slc2a13	-0.255416637	2.15E-31	Down	Cluster_3v4	D1+ MSN	12str
Slc44a5	0.313087735	3.32E-70	Up	Cluster_3v4	D1+ MSN	12str
Slc6a6	-0.400018938	2.15E-170	Down	Cluster_3v4	D1+ MSN	12str
Slc8a1	0.42586087	3.37E-66	Up	Cluster_3v4	D1+ MSN	12str
Slc8a2	-0.347075593	2.02E-117	Down	Cluster_3v4	D1+ MSN	12str
Smad3	-0.366059269	5.79E-114	Down	Cluster_3v4	D1+ MSN	12str
Snrnp48	0.251230652	9.51E-52	Up	Cluster_3v4	D1+ MSN	12str
Sntb2	-0.340582318	6.37E-85	Down	Cluster_3v4	D1+ MSN	12str
Snx29	0.280834912	1.24E-64	Up	Cluster_3v4	D1+ MSN	12str
Sorbs2os	-0.372907504	2.26E-103	Down	Cluster_3v4	D1+ MSN	12str
Spata13	-0.358569385	2.12E-115	Down	Cluster_3v4	D1+ MSN	12str
Spata16	-0.29583507	1.08E-81	Down	Cluster_3v4	D1+ MSN	12str
St7	0.318047103	1.94E-89	Up	Cluster_3v4	D1+ MSN	12str
Stk3	0.386720206	1.85E-111	Up	Cluster_3v4	D1+ MSN	12str
Strn	-0.632330348	2.31E-273	Down	Cluster_3v4	D1+ MSN	12str
Stxbp4	0.257492348	1.08E-59	Up	Cluster_3v4	D1+ MSN	12str
Syndig1l	-0.301269875	1.77E-95	Down	Cluster_3v4	D1+ MSN	12str
Tbc1d4	-0.326406186	6.52E-70	Down	Cluster_3v4	D1+ MSN	12str
Tbc1d8	-0.433657422	1.21E-141	Down	Cluster_3v4	D1+ MSN	12str
Tenm1	0.315835201	8.92E-68	Up	Cluster_3v4	D1+ MSN	12str
Tesc	-0.446321692	1.33E-188	Down	Cluster_3v4	D1+ MSN	12str
Tiam1	-0.280786474	1.11E-29	Down	Cluster_3v4	D1+ MSN	12str
Tmem178b	0.300284423	2.59E-139	Up	Cluster_3v4	D1+ MSN	12str
Traip	-0.37317689	1.6E-154	Down	Cluster_3v4	D1+ MSN	12str
Trank1	-0.323553429	3.88E-116	Down	Cluster_3v4	D1+ MSN	12str
Tshz2	0.442950491	4.61E-35	Up	Cluster_3v4	D1+ MSN	12str
Ube3a	0.310027893	1.9E-155	Up	Cluster_3v4	D1+ MSN	12str
Wipf3	-0.256859822	8.38E-39	Down	Cluster_3v4	D1+ MSN	12str
Ypel2	-0.260136571	3.01E-55	Down	Cluster_3v4	D1+ MSN	12str
Zfhx3	0.329638693	1.74E-59	Up	Cluster_3v4	D1+ MSN	12str
Zfp207	0.263480419	3.71E-64	Up	Cluster_3v4	D1+ MSN	12str
Zfp804a	0.30583403	1.11E-64	Up	Cluster_3v4	D1+ MSN	12str
Zfp804b	0.545947815	1.03E-89	Up	Cluster_3v4	D1+ MSN	12str
Zmym4	0.337434663	4.61E-113	Up	Cluster_3v4	D1+ MSN	12str
Zranb2	0.289132704	2.21E-84	Up	Cluster_3v4	D1+ MSN	12str
A830082K12Rik	0.318475143	4.96E-104	Up	Cluster_3v4	D1+ MSN	12str
Adcy9	-0.25562507	2.37E-63	Down	Cluster_3v4	D1+ MSN	12str
Ankrd33b	-0.272181528	1.6E-59	Down	Cluster_3v4	D1+ MSN	12str
Bcl11a	0.256840183	5.79E-58	Up	Cluster_3v4	D1+ MSN	12str
C530008M17Rik	0.284118654	9.67E-60	Up	Cluster_3v4	D1+ MSN	12str
C77370	0.252955981	2.27E-39	Up	Cluster_3v4	D1+ MSN	12str
Celf5	-0.256552433	4.13E-63	Down	Cluster_3v4	D1+ MSN	12str
Cntnap3	-0.650382611	4.16E-232	Down	Cluster_3v4	D1+ MSN	12str
Cntrl	0.252984471	1.9E-91	Up	Cluster_3v4	D1+ MSN	12str
Col25a1	0.268200803	2.68E-61	Up	Cluster_3v4	D1+ MSN	12str
Crym	-0.348601346	4.25E-104	Down	Cluster_3v4	D1+ MSN	12str
Efr3b	-0.26059034	3.67E-50	Down	Cluster_3v4	D1+ MSN	12str
Elavl3	0.25899658	2.47E-62	Up	Cluster_3v4	D1+ MSN	12str
Fam212b	-0.259245216	8.52E-86	Down	Cluster_3v4	D1+ MSN	12str
Gap43	0.316244247	8.87E-84	Up	Cluster_3v4	D1+ MSN	12str
Garnl3	0.342171185	1.47E-72	Up	Cluster_3v4	D1+ MSN	12str
Glra2	0.293061123	5.83E-70	Up	Cluster_3v4	D1+ MSN	12str
Gm26542	-0.250082873	9.74E-50	Down	Cluster_3v4	D1+ MSN	12str
Gm42439	-0.292599934	5.95E-54	Down	Cluster_3v4	D1+ MSN	12str
Gnas	0.291447168	1.59E-89	Up	Cluster_3v4	D1+ MSN	12str
Gpr83	-0.250873639	2.74E-101	Down	Cluster_3v4	D1+ MSN	12str
Man1c1	-0.28632711	1.07E-58	Down	Cluster_3v4	D1+ MSN	12str
Mcu	0.279245537	2.49E-66	Up	Cluster_3v4	D1+ MSN	12str
Necab1	-0.2895081	0.000000288	Down	Cluster_3v4	D1+ MSN	12str
Pard3	-0.303328618	1.18E-103	Down	Cluster_3v4	D1+ MSN	12str
Pitpnm3	-0.308773277	2.14E-101	Down	Cluster_3v4	D1+ MSN	12str
Plekhg5	-0.279343365	7.79E-82	Down	Cluster_3v4	D1+ MSN	12str
Prrc2c	0.257980016	6.83E-76	Up	Cluster_3v4	D1+ MSN	12str
Rasgrf2	-0.267114946	2.19E-17	Down	Cluster_3v4	D1+ MSN	12str
Smg5	-0.292413809	2.58E-73	Down	Cluster_3v4	D1+ MSN	12str
Sntg2	-0.256725056	4.04E-42	Down	Cluster_3v4	D1+ MSN	12str
Sorbs2	-0.28962235	1.58E-106	Down	Cluster_3v4	D1+ MSN	12str
Stmn2	0.293121595	9.69E-73	Up	Cluster_3v4	D1+ MSN	12str
Tcp11l1	0.277045792	2.48E-70	Up	Cluster_3v4	D1+ MSN	12str
Thbs3	-0.274434181	1.62E-90	Down	Cluster_3v4	D1+ MSN	12str
Ttc28	0.322384438	4.64E-105	Up	Cluster_3v4	D1+ MSN	12str
Upp2	0.274708999	9.77E-52	Up	Cluster_3v4	D1+ MSN	12str
A930015D03Rik	0.348392003	2.4135e-100	Up	Cluster_0	D1+ MSN	8str
Ccnl2	0.48848476	2.4454e-225	Up	Cluster_0	D1+ MSN	8str
Malat1	-0.604680311	0	Down	Cluster_0	D1+ MSN	8str
Rbm28	0.328853065	9.2344e-93	Up	Cluster_0	D1+ MSN	8str
Ddx5	0.424372561	2.4847e-206	Up	Cluster_0	D1+ MSN	8str
Kcnab1	-0.410382887	7.5974e-225	Down	Cluster_0	D1+ MSN	8str
Pafah1b1	0.383962771	1.0271e-165	Up	Cluster_0	D1+ MSN	8str
Tra2a	0.371235051	2.9433e-146	Up	Cluster_0	D1+ MSN	8str
Atad2b	0.352525462	2.0489e-104	Up	Cluster_0	D1+ MSN	8str
Celf2	-0.415042341	0	Down	Cluster_0	D1+ MSN	8str
Chuk	0.294265387	2.77804e-75	Up	Cluster_0	D1+ MSN	8str
Nnat	-0.35081418	6.57695e-30	Down	Cluster_0	D1+ MSN	8str
Phactr1	-0.552418299	0	Down	Cluster_0	D1+ MSN	8str
Polr2a	0.301501685	4.29036e-72	Up	Cluster_0	D1+ MSN	8str
Slc15a2	0.276629092	7.2948e-99	Up	Cluster_0	D1+ MSN	8str
Son	0.308112742	6.9437e-126	Up	Cluster_0	D1+ MSN	8str
Taf15	0.353259544	2.3371e-112	Up	Cluster_0	D1+ MSN	8str
Trpm3	-0.365046914	3.92411e-23	Down	Cluster_0	D1+ MSN	8str
A330015K06Rik	-0.402013958	3.2231e-136	Down	Cluster_0	D1+ MSN	8str
Ano4	0.375764968	1.2728e-105	Up	Cluster_0	D1+ MSN	8str
Ckb	-0.338213165	1.8034e-85	Down	Cluster_0	D1+ MSN	8str
Ckb	-0.338213165	1.8034e-85	Down	Cluster_0	D1+ MSN	8str
Dpyd	0.316219076	3.98179e-43	Up	Cluster_0	D1+ MSN	8str
Frmd4a	0.302036531	7.491e-114	Up	Cluster_0	D1+ MSN	8str
Gm20754	0.536267539	5.4655e-178	Up	Cluster_0	D1+ MSN	8str
Grik2	-0.331858339	3.2576e-242	Down	Cluster_0	D1+ MSN	8str
Grm3	-0.557381079	1.6899e-199	Down	Cluster_0	D1+ MSN	8str
Guf1	0.291109644	1.32097e-79	Up	Cluster_0	D1+ MSN	8str
Kcnj3	0.305596644	7.82709e-48	Up	Cluster_0	D1+ MSN	8str
Ldlrad4	-0.335624883	2.8822e-40	Down	Cluster_0	D1+ MSN	8str
Nr6a1	0.310443244	9.37162e-78	Up	Cluster_0	D1+ MSN	8str
Ogt	0.300144118	2.2066e-113	Up	Cluster_0	D1+ MSN	8str
Pdzd2	-0.409545282	3.0301e-123	Down	Cluster_0	D1+ MSN	8str
Ppp1r16b	-0.330656484	6.38783e-87	Down	Cluster_0	D1+ MSN	8str
Prpf4b	0.27238049	1.49809e-66	Up	Cluster_0	D1+ MSN	8str
Sfmbt2	0.514286599	5.1038e-230	Up	Cluster_0	D1+ MSN	8str
Strn3	0.276455475	5.05883e-88	Up	Cluster_0	D1+ MSN	8str
Stxbp6	0.259981145	1.28567e-35	Up	Cluster_0	D1+ MSN	8str
Thsd7a	-0.517562562	2.7449e-165	Down	Cluster_0	D1+ MSN	8str
Tmem117	0.353641677	2.1005e-107	Up	Cluster_0	D1+ MSN	8str
Ube3a	0.380548936	4.4074e-223	Up	Cluster_0	D1+ MSN	8str
A330008L17Rik	-0.499630334	1.3012e-130	Down	Cluster_0	D1+ MSN	8str
Acyp2	0.25091624	1.21607e-46	Up	Cluster_0	D1+ MSN	8str
Adcy5	-0.764394347	0	Down	Cluster_0	D1+ MSN	8str
Anks1b	-0.38577206	0	Down	Cluster_0	D1+ MSN	8str
Ano3	-0.267086098	1.25617e-56	Down	Cluster_0	D1+ MSN	8str
Arid5b	0.447610868	2.759e-130	Up	Cluster_0	D1+ MSN	8str
Atp2b1	-0.35884739	1.9675e-140	Down	Cluster_0	D1+ MSN	8str
Baz2b	0.271100156	4.32743e-65	Up	Cluster_0	D1+ MSN	8str
Brinp3	0.308045459	1.49344e-20	Up	Cluster_0	D1+ MSN	8str
Cacna1e	-0.311274424	2.5536e-149	Down	Cluster_0	D1+ MSN	8str
Cacna2d3	-0.452579115	0	Down	Cluster_0	D1+ MSN	8str
Cacnb2	-0.380211933	3.4952e-110	Down	Cluster_0	D1+ MSN	8str
Camk2b	-0.547556296	1.2529e-290	Down	Cluster_0	D1+ MSN	8str
Camkv	-0.481133552	2.7457e-224	Down	Cluster_0	D1+ MSN	8str
Ccdc58	0.368207572	6.51727e-98	Up	Cluster_0	D1+ MSN	8str
Cdh13	-0.455432754	4.16821e-83	Down	Cluster_0	D1+ MSN	8str
Cdh18	0.529951558	7.3047e-170	Up	Cluster_0	D1+ MSN	8str
Cdk14	0.328938899	1.12408e-73	Up	Cluster_0	D1+ MSN	8str
Cntn4	-0.257041565	2.02899e-36	Down	Cluster_0	D1+ MSN	8str
Dgkb	-0.361583549	1.917e-233	Down	Cluster_0	D1+ MSN	8str
Dlc1	0.292110972	6.25732e-60	Up	Cluster_0	D1+ MSN	8str
Dlc1	0.292110972	6.25732e-60	Up	Cluster_0	D1+ MSN	8str
Dscam	0.276951204	3.78266e-15	Up	Cluster_0	D1+ MSN	8str
Edil3	0.354360984	6.27955e-63	Up	Cluster_0	D1+ MSN	8str
Fam155a	0.914587057	1.3553e-277	Up	Cluster_0	D1+ MSN	8str
Fmnl2	0.48346988	8.032e-156	Up	Cluster_0	D1+ MSN	8str
Gm27247	-0.577382165	2.4528e-141	Down	Cluster_0	D1+ MSN	8str
Grip1	0.403905177	1.1204e-142	Up	Cluster_0	D1+ MSN	8str
Grip1	0.403905177	1.1204e-142	Up	Cluster_0	D1+ MSN	8str
Grm1	-0.439248289	6.01975e-97	Down	Cluster_0	D1+ MSN	8str
Grm5	-0.318661621	0	Down	Cluster_0	D1+ MSN	8str
Hap1	-0.278139488	2.88791e-47	Down	Cluster_0	D1+ MSN	8str
Hs6st3	-0.306044291	1.73958e-34	Down	Cluster_0	D1+ MSN	8str
Inpp4b	0.376566685	1.75447e-46	Up	Cluster_0	D1+ MSN	8str
Itpka	-0.317295716	1.7065e-101	Down	Cluster_0	D1+ MSN	8str
Kcnq5	-0.453712633	0	Down	Cluster_0	D1+ MSN	8str
Kirrel3	-0.254441221	8.37384e-57	Down	Cluster_0	D1+ MSN	8str
Lpp	0.463031757	7.071e-162	Up	Cluster_0	D1+ MSN	8str
Lrch3	0.250719247	1.38821e-58	Up	Cluster_0	D1+ MSN	8str
Luc7l2	0.267425666	2.7311e-111	Up	Cluster_0	D1+ MSN	8str
Msi2	0.302970388	1.33502e-61	Up	Cluster_0	D1+ MSN	8str
Npas2	-0.634452705	0	Down	Cluster_0	D1+ MSN	8str
Npas3	0.325310275	3.29663e-94	Up	Cluster_0	D1+ MSN	8str
Opcml	-0.298697939	3.07766e-51	Down	Cluster_0	D1+ MSN	8str
Osbpl8	-0.386492676	6.4596e-151	Down	Cluster_0	D1+ MSN	8str
Parp8	0.281022905	5.19955e-66	Up	Cluster_0	D1+ MSN	8str
Pcdh15	0.372203902	4.89376e-20	Up	Cluster_0	D1+ MSN	8str
Pde10a	-0.85673123	0	Down	Cluster_0	D1+ MSN	8str
Pde1c	-0.741776456	3.5439e-99	Down	Cluster_0	D1+ MSN	8str
Ppfia2	0.326227106	3.7263e-129	Up	Cluster_0	D1+ MSN	8str
Ppp2r3a	0.294044735	1.4788e-69	Up	Cluster_0	D1+ MSN	8str
Ppp2r3a	0.294044735	1.4788e-69	Up	Cluster_0	D1+ MSN	8str
Prkcb	-0.415362799	3.3911e-179	Down	Cluster_0	D1+ MSN	8str
Rap1gap	-0.544233333	9.9308e-257	Down	Cluster_0	D1+ MSN	8str
Rgs9	-0.756811878	0	Down	Cluster_0	D1+ MSN	8str
Ryr3	-0.256987122	1.413e-106	Down	Cluster_0	D1+ MSN	8str
Sez6	-0.486750759	1.7624e-154	Down	Cluster_0	D1+ MSN	8str
Slc24a2	-0.345102616	2.39287e-88	Down	Cluster_0	D1+ MSN	8str
Snhg11	0.325336139	5.63677e-94	Up	Cluster_0	D1+ MSN	8str
Sobp	0.356238082	5.58931e-89	Up	Cluster_0	D1+ MSN	8str
Tmod1	-0.330968146	6.79519e-98	Down	Cluster_0	D1+ MSN	8str
Tnr	0.344446505	5.06549e-90	Up	Cluster_0	D1+ MSN	8str
Unc13c	-0.361048442	4.83957e-73	Down	Cluster_0	D1+ MSN	8str
4930509J09Rik	0.397265781	8.42539e-90	Up	Cluster_0	D1+ MSN	8str
4930555F03Rik	0.45929947	9.16778e-98	Up	Cluster_0	D1+ MSN	8str
5330417C22Rik	-0.394605767	5.1268e-148	Down	Cluster_0	D1+ MSN	8str
A230006K03Rik	0.32252327	4.5291e-105	Up	Cluster_0	D1+ MSN	8str
Adam12	-0.30200387	6.54591e-26	Down	Cluster_0	D1+ MSN	8str
Apc	0.335341813	2.4938e-150	Up	Cluster_0	D1+ MSN	8str
Arhgap10	-0.394592017	2.8732e-158	Down	Cluster_0	D1+ MSN	8str
Arhgap10	-0.394592017	2.8732e-158	Down	Cluster_0	D1+ MSN	8str
Baiap2	-0.326000795	1.8771e-133	Down	Cluster_0	D1+ MSN	8str
Bicd1	0.286427659	7.36962e-84	Up	Cluster_0	D1+ MSN	8str
Cacng4	-0.343105492	3.20593e-98	Down	Cluster_0	D1+ MSN	8str
Camk2d	0.468588407	2.1409e-93	Up	Cluster_0	D1+ MSN	8str
Camk4	-0.444961419	6.5125e-171	Down	Cluster_0	D1+ MSN	8str
Car11	-0.37476236	5.0554e-139	Down	Cluster_0	D1+ MSN	8str
Car11	-0.37476236	5.0554e-139	Down	Cluster_0	D1+ MSN	8str
Ccdc88c	-0.385781909	1.9114e-124	Down	Cluster_0	D1+ MSN	8str
Ccser1	0.29164717	4.3345e-111	Up	Cluster_0	D1+ MSN	8str
Cdh10	0.309769473	1.74649e-61	Up	Cluster_0	D1+ MSN	8str
Cnr1	-0.433676771	3.98052e-62	Down	Cluster_0	D1+ MSN	8str
Cnr1	-0.433676771	3.98052e-62	Down	Cluster_0	D1+ MSN	8str
Cntn5	-0.602075618	7.1823e-177	Down	Cluster_0	D1+ MSN	8str
Cntn6	0.258588743	5.61571e-42	Up	Cluster_0	D1+ MSN	8str
Col6a1	-0.293605785	3.45923e-59	Down	Cluster_0	D1+ MSN	8str
Enah	0.343276793	9.5789e-111	Up	Cluster_0	D1+ MSN	8str
Exoc6b	0.254777863	8.48191e-79	Up	Cluster_0	D1+ MSN	8str
Ext1	0.253838682	2.01174e-61	Up	Cluster_0	D1+ MSN	8str
Fam126a	0.514042402	8.4473e-159	Up	Cluster_0	D1+ MSN	8str
Gkap1	0.25275626	1.43013e-54	Up	Cluster_0	D1+ MSN	8str
Gm15810	-0.333707647	2.44073e-92	Down	Cluster_0	D1+ MSN	8str
Gm26699	0.278697968	9.46175e-68	Up	Cluster_0	D1+ MSN	8str
Gmds	0.266930391	1.09037e-58	Up	Cluster_0	D1+ MSN	8str
Gng7	-0.261988995	2.3085e-87	Down	Cluster_0	D1+ MSN	8str
Grin1	-0.279191401	2.4873e-106	Down	Cluster_0	D1+ MSN	8str
Grin1	-0.279191401	2.4873e-106	Down	Cluster_0	D1+ MSN	8str
Gsg1l	-0.67826507	0	Down	Cluster_0	D1+ MSN	8str
Icam5	-0.287364617	1.64793e-91	Down	Cluster_0	D1+ MSN	8str
Inf2	-0.487743051	5.2019e-187	Down	Cluster_0	D1+ MSN	8str
Iqgap2	-0.401344702	2.7791e-119	Down	Cluster_0	D1+ MSN	8str
Kcnd2	-0.259907572	1.2212e-145	Down	Cluster_0	D1+ MSN	8str
Kcnip2	-0.360920089	1.4645e-115	Down	Cluster_0	D1+ MSN	8str
Kcnip3	-0.418638966	1.7453e-122	Down	Cluster_0	D1+ MSN	8str
Kctd8	-0.262881501	4.80315e-27	Down	Cluster_0	D1+ MSN	8str
Klf12	0.278638515	1.02301e-55	Up	Cluster_0	D1+ MSN	8str
L3mbtl3	0.308754141	6.25071e-56	Up	Cluster_0	D1+ MSN	8str
Lrrk2	-0.253447171	3.20279e-40	Down	Cluster_0	D1+ MSN	8str
Luzp1	0.281699479	1.16433e-49	Up	Cluster_0	D1+ MSN	8str
Lzts3	-0.299605848	1.12165e-84	Down	Cluster_0	D1+ MSN	8str
Mapk4	-0.388366808	2.06297e-85	Down	Cluster_0	D1+ MSN	8str
Mast2	0.279184873	1.45336e-64	Up	Cluster_0	D1+ MSN	8str
Mgat4c	0.463247161	2.8259e-192	Up	Cluster_0	D1+ MSN	8str
Mtcl1	-0.28658526	5.34026e-58	Down	Cluster_0	D1+ MSN	8str
Ncor1	0.26509081	7.09009e-83	Up	Cluster_0	D1+ MSN	8str
Neto1	-0.269108335	1.29585e-74	Down	Cluster_0	D1+ MSN	8str
Nrg1	-0.419249769	1.159e-213	Down	Cluster_0	D1+ MSN	8str
Nsun7	0.31446479	4.1416e-80	Up	Cluster_0	D1+ MSN	8str
Ntng1	0.586755732	2.27639e-89	Up	Cluster_0	D1+ MSN	8str
Pard3	-0.342985893	1.0856e-151	Down	Cluster_0	D1+ MSN	8str
Pcdh9	0.31108148	3.87939e-77	Up	Cluster_0	D1+ MSN	8str
Pde1b	-0.475943026	6.9143e-198	Down	Cluster_0	D1+ MSN	8str
Pde2a	-0.348505981	2.7014e-124	Down	Cluster_0	D1+ MSN	8str
Pde4a	-0.30369916	3.65835e-83	Down	Cluster_0	D1+ MSN	8str
Pde7b	-0.401462245	3.703e-170	Down	Cluster_0	D1+ MSN	8str
PISD	-0.368536556	5.82778e-28	Down	Cluster_0	D1+ MSN	8str
Pmepa1	-0.314232355	4.97192e-80	Down	Cluster_0	D1+ MSN	8str
Prickle2	0.290140582	4.24062e-86	Up	Cluster_0	D1+ MSN	8str
Ptpn5	-0.381808175	1.2751e-125	Down	Cluster_0	D1+ MSN	8str
Rarb	-0.329875966	5.4359e-117	Down	Cluster_0	D1+ MSN	8str
Rgs11	-0.272960818	1.888e-110	Down	Cluster_0	D1+ MSN	8str
Rock1	0.28186341	2.10515e-75	Up	Cluster_0	D1+ MSN	8str
Ror1	-0.544247605	7.0178e-143	Down	Cluster_0	D1+ MSN	8str
Rps6ka5	-0.256271722	5.36876e-42	Down	Cluster_0	D1+ MSN	8str
Ryr1	-0.430013472	3.3293e-190	Down	Cluster_0	D1+ MSN	8str
Sgk1	-0.438217151	3.1407e-99	Down	Cluster_0	D1+ MSN	8str
Shisa9	-0.334318876	2.4097e-120	Down	Cluster_0	D1+ MSN	8str
Slc24a4	-0.345622351	1.96608e-61	Down	Cluster_0	D1+ MSN	8str
Slc4a4	-0.417725262	3.2974e-162	Down	Cluster_0	D1+ MSN	8str
Sorcs2	-0.441560005	2.1387e-99	Down	Cluster_0	D1+ MSN	8str
Spock3	-0.561198429	7.8515e-285	Down	Cluster_0	D1+ MSN	8str
Stk3	0.285648807	4.18074e-66	Up	Cluster_0	D1+ MSN	8str
Stk3	0.285648807	4.18074e-66	Up	Cluster_0	D1+ MSN	8str
Stk32a	-0.34886814	1.67682e-85	Down	Cluster_0	D1+ MSN	8str
Synpr	-0.282737505	1.24387e-51	Down	Cluster_0	D1+ MSN	8str
Tenm1	0.380485098	4.76401e-93	Up	Cluster_0	D1+ MSN	8str
Tmem178b	0.347854379	7.3963e-169	Up	Cluster_0	D1+ MSN	8str
Tmem191c	-0.317277054	5.5092e-109	Down	Cluster_0	D1+ MSN	8str
Zfp618	0.29752653	6.33425e-73	Up	Cluster_0	D1+ MSN	8str
Zfp804b	0.474403305	6.71285e-71	Up	Cluster_0	D1+ MSN	8str
Zfyve28	-0.387930949	5.4279e-142	Down	Cluster_0	D1+ MSN	8str
Zswim6	-0.392426146	1.4598e-106	Down	Cluster_0	D1+ MSN	8str
4930448N21Rik	-0.277865772	6.44741e-90	Down	Cluster_0	D1+ MSN	8str
A830036E02Rik	0.277128711	4.22967e-68	Up	Cluster_0	D1+ MSN	8str
Ablim1	0.300323767	4.09415e-70	Up	Cluster_0	D1+ MSN	8str
Actn2	-0.278030957	5.62909e-56	Down	Cluster_0	D1+ MSN	8str
Acvr1c	-0.328847	6.06597e-82	Down	Cluster_0	D1+ MSN	8str
Adarb2	0.327951454	2.46498e-21	Up	Cluster_0	D1+ MSN	8str
Agbl4	0.377764306	3.0662e-106	Up	Cluster_0	D1+ MSN	8str
Agfg2	-0.251454568	4.20058e-59	Down	Cluster_0	D1+ MSN	8str
Ano2	-0.388096963	3.76149e-95	Down	Cluster_0	D1+ MSN	8str
Atf6	-0.323116355	6.52642e-86	Down	Cluster_0	D1+ MSN	8str
BC005561	0.31644881	2.36403e-78	Up	Cluster_0	D1+ MSN	8str
Bcl11b	-0.270765717	4.50857e-71	Down	Cluster_0	D1+ MSN	8str
Bmp6	-0.283317563	7.23623e-76	Down	Cluster_0	D1+ MSN	8str
Car12	-0.479686467	1.4977e-183	Down	Cluster_0	D1+ MSN	8str
Cep164	0.263558066	2.34558e-63	Up	Cluster_0	D1+ MSN	8str
Clasp2	0.253008491	7.99619e-69	Up	Cluster_0	D1+ MSN	8str
Cntnap3	-0.632715501	1.6356e-226	Down	Cluster_0	D1+ MSN	8str
Cpne4	0.310546428	6.77358e-27	Up	Cluster_0	D1+ MSN	8str
Crocc	-0.42797433	2.8825e-161	Down	Cluster_0	D1+ MSN	8str
D430041D05Rik	-0.259184596	4.84131e-56	Down	Cluster_0	D1+ MSN	8str
Dach1	-0.267875002	9.24388e-41	Down	Cluster_0	D1+ MSN	8str
Dmd	0.295738075	1.26112e-92	Up	Cluster_0	D1+ MSN	8str
Dnajc6	0.25147927	2.39954e-54	Up	Cluster_0	D1+ MSN	8str
Ebf1	0.269116491	1.43981e-09	Up	Cluster_0	D1+ MSN	8str
Elmod1	-0.286935792	2.208e-109	Down	Cluster_0	D1+ MSN	8str
Epha3	0.281206337	1.07574e-47	Up	Cluster_0	D1+ MSN	8str
Erbb4	0.433538085	1.14026e-46	Up	Cluster_0	D1+ MSN	8str
Fam184b	-0.339130753	1.09432e-84	Down	Cluster_0	D1+ MSN	8str
Fam196b	0.279122289	1.58293e-81	Up	Cluster_0	D1+ MSN	8str
Fam19a2	0.260419434	2.14091e-11	Up	Cluster_0	D1+ MSN	8str
Fign	0.376297832	4.85623e-80	Up	Cluster_0	D1+ MSN	8str
Foxn3	0.274861161	6.7966e-54	Up	Cluster_0	D1+ MSN	8str
Foxo1	-0.493024358	3.1951e-150	Down	Cluster_0	D1+ MSN	8str
Frmd4b	-0.377369664	4.207e-65	Down	Cluster_0	D1+ MSN	8str
Fstl5	0.360080842	1.64246e-84	Up	Cluster_0	D1+ MSN	8str
Gabrd	-0.453542743	2.9917e-182	Down	Cluster_0	D1+ MSN	8str
Gigyf2	0.276757821	8.10493e-70	Up	Cluster_0	D1+ MSN	8str
Gli3	-0.257390667	4.07839e-54	Down	Cluster_0	D1+ MSN	8str
Gm1043	-0.252250787	5.95701e-60	Down	Cluster_0	D1+ MSN	8str
Gm21092	0.271789275	7.28492e-78	Up	Cluster_0	D1+ MSN	8str
Gm26804	0.25346534	9.48594e-68	Up	Cluster_0	D1+ MSN	8str
Gm28905	-0.494726607	1.6141e-160	Down	Cluster_0	D1+ MSN	8str
Gpm6b	-0.325843895	1.02722e-86	Down	Cluster_0	D1+ MSN	8str
Gpr149	0.271150435	2.70967e-36	Up	Cluster_0	D1+ MSN	8str
Hcn1	0.470365113	6.0883e-129	Up	Cluster_0	D1+ MSN	8str
Homer1	-0.450033203	3.7582e-147	Down	Cluster_0	D1+ MSN	8str
Il1rapl2	-0.376788876	6.39997e-08	Down	Cluster_0	D1+ MSN	8str
Ildr2	0.270051149	4.71627e-55	Up	Cluster_0	D1+ MSN	8str
Itch	0.299805453	5.7926e-79	Up	Cluster_0	D1+ MSN	8str
Itpr1	-0.398715223	3.5702e-171	Down	Cluster_0	D1+ MSN	8str
Kansl1	0.279193833	5.5675e-104	Up	Cluster_0	D1+ MSN	8str
Kcnd3	0.313744667	3.71213e-42	Up	Cluster_0	D1+ MSN	8str
Kcnh4	-0.399038436	2.6312e-179	Down	Cluster_0	D1+ MSN	8str
Klhdc10	0.304839937	1.94948e-87	Up	Cluster_0	D1+ MSN	8str
Lars	0.251264645	1.40227e-52	Up	Cluster_0	D1+ MSN	8str
Limk2	0.292138435	4.19787e-68	Up	Cluster_0	D1+ MSN	8str
Lrfn2	0.26236675	5.71833e-47	Up	Cluster_0	D1+ MSN	8str
Lynx1	-0.260851488	1.98585e-85	Down	Cluster_0	D1+ MSN	8str
Mast4	0.26034514	1.65528e-34	Up	Cluster_0	D1+ MSN	8str
Mdk	-0.395626219	2.0785e-156	Down	Cluster_0	D1+ MSN	8str
Meg3	0.296417983	0	Up	Cluster_0	D1+ MSN	8str
Meis1	0.322103775	1.65709e-53	Up	Cluster_0	D1+ MSN	8str
Mhrt	-0.674621801	1.4488e-259	Down	Cluster_0	D1+ MSN	8str
Myo3b	-0.343559274	1.82836e-41	Down	Cluster_0	D1+ MSN	8str
Ndrg4	-0.276407494	2.5873e-74	Down	Cluster_0	D1+ MSN	8str
Neto2	-0.364949808	6.89781e-91	Down	Cluster_0	D1+ MSN	8str
Ngef	-0.260589216	4.31784e-60	Down	Cluster_0	D1+ MSN	8str
Olfm3	0.397775433	4.96079e-98	Up	Cluster_0	D1+ MSN	8str
Pde4d	0.257196406	3.57138e-50	Up	Cluster_0	D1+ MSN	8str
Plekhg5	-0.265618607	1.43931e-82	Down	Cluster_0	D1+ MSN	8str
Ppp1r1a	-0.333640253	3.5836e-99	Down	Cluster_0	D1+ MSN	8str
Ppp1r1b	-0.256491143	6.49136e-67	Down	Cluster_0	D1+ MSN	8str
Ppp3ca	-0.429450846	0	Down	Cluster_0	D1+ MSN	8str
Ppp4r4	-0.457789982	3.8199e-169	Down	Cluster_0	D1+ MSN	8str
Ptchd4	0.263462521	4.05448e-58	Up	Cluster_0	D1+ MSN	8str
Ptprz1	0.301739124	8.11261e-35	Up	Cluster_0	D1+ MSN	8str
Rasgef1a	-0.359882436	3.9058e-130	Down	Cluster_0	D1+ MSN	8str
Rasgrp2	-0.403743249	2.6453e-155	Down	Cluster_0	D1+ MSN	8str
Reln	-0.344892982	3.18029e-46	Down	Cluster_0	D1+ MSN	8str
Rgs20	-0.274836309	9.97404e-41	Down	Cluster_0	D1+ MSN	8str
Rhobtb2	-0.303372256	8.267e-78	Down	Cluster_0	D1+ MSN	8str
Rnf112	-0.342238053	3.369e-114	Down	Cluster_0	D1+ MSN	8str
Rnf144a	-0.383024605	6.022e-114	Down	Cluster_0	D1+ MSN	8str
Runx2	0.256937338	4.59529e-44	Up	Cluster_0	D1+ MSN	8str
Scaper	0.267192746	1.64267e-71	Up	Cluster_0	D1+ MSN	8str
Scn4b	-0.475820792	1.2463e-254	Down	Cluster_0	D1+ MSN	8str
Sec14l1	-0.330647947	5.82908e-97	Down	Cluster_0	D1+ MSN	8str
Senp6	0.256017298	5.65881e-64	Up	Cluster_0	D1+ MSN	8str
Slc24a3	0.299341644	7.53845e-57	Up	Cluster_0	D1+ MSN	8str
Slc6a6	-0.34731492	6.9586e-116	Down	Cluster_0	D1+ MSN	8str
Snrnp70	0.305775858	2.3593e-130	Up	Cluster_0	D1+ MSN	8str
Ssbp4	-0.270497544	1.19261e-64	Down	Cluster_0	D1+ MSN	8str
St7	0.306995802	7.02742e-87	Up	Cluster_0	D1+ MSN	8str
Strn	-0.556347683	4.0014e-202	Down	Cluster_0	D1+ MSN	8str
Stx16	0.274444218	6.29332e-71	Up	Cluster_0	D1+ MSN	8str
Syndig1l	-0.285089401	1.01812e-94	Down	Cluster_0	D1+ MSN	8str
Tbc1d8	-0.347638266	1.5604e-101	Down	Cluster_0	D1+ MSN	8str
Tcf4	0.267654785	6.11812e-48	Up	Cluster_0	D1+ MSN	8str
Traip	-0.471307836	3.5949e-214	Down	Cluster_0	D1+ MSN	8str
Tshz2	0.653058314	1.30286e-97	Up	Cluster_0	D1+ MSN	8str
Vsnl1	0.431543683	4.0631e-108	Up	Cluster_0	D1+ MSN	8str
Zmym4	0.293539213	4.59938e-88	Up	Cluster_0	D1+ MSN	8str
9430020K01Rik	-0.254734783	2.7951e-47	Down	Cluster_0	D1+ MSN	8str
A930011G23Rik	-0.28921966	1.89277e-81	Down	Cluster_0	D1+ MSN	8str
Aff2	0.26368894	6.66299e-40	Up	Cluster_0	D1+ MSN	8str
Arhgap33	-0.287545387	5.14935e-83	Down	Cluster_0	D1+ MSN	8str
Atxn1	-0.251051474	5.2755e-105	Down	Cluster_0	D1+ MSN	8str
Cttnbp2	-0.27320662	4.8831e-115	Down	Cluster_0	D1+ MSN	8str
Cul5	0.257113945	3.57386e-53	Up	Cluster_0	D1+ MSN	8str
Dpy19l3	-0.254093119	3.03707e-60	Down	Cluster_0	D1+ MSN	8str
Drd1	-0.348408316	3.9301e-118	Down	Cluster_0	D1+ MSN	8str
Esrrg	0.263829572	1.31793e-38	Up	Cluster_0	D1+ MSN	8str
Gm26883	0.483550325	6.95681e-84	Up	Cluster_0	D1+ MSN	8str
Gm38112	0.257951809	1.73965e-61	Up	Cluster_0	D1+ MSN	8str
Greb1l	0.320887038	2.9638e-66	Up	Cluster_0	D1+ MSN	8str
Igsf21	-0.307498672	1.3642e-161	Down	Cluster_0	D1+ MSN	8str
Kdm3a	-0.251993793	2.58671e-53	Down	Cluster_0	D1+ MSN	8str
Kif17	-0.257140284	2.28614e-60	Down	Cluster_0	D1+ MSN	8str
Lrtm1	-0.28911821	4.40768e-67	Down	Cluster_0	D1+ MSN	8str
Magi3	0.285549586	3.44931e-48	Up	Cluster_0	D1+ MSN	8str
Mpp7	-0.256019541	2.28141e-41	Down	Cluster_0	D1+ MSN	8str
Osbp2	-0.259752776	1.57882e-50	Down	Cluster_0	D1+ MSN	8str
Osbp2	-0.259752776	1.57882e-50	Down	Cluster_0	D1+ MSN	8str
Pcdh10	0.28203934	4.39548e-59	Up	Cluster_0	D1+ MSN	8str
Pitpnm3	-0.273584567	2.37658e-74	Down	Cluster_0	D1+ MSN	8str
Ralyl	0.260945457	5.84408e-51	Up	Cluster_0	D1+ MSN	8str
Samd5	-0.252443093	2.75254e-30	Down	Cluster_0	D1+ MSN	8str
Sgk3	-0.284585057	2.46266e-65	Down	Cluster_0	D1+ MSN	8str
Sh3rf2	-0.320952657	8.43105e-56	Down	Cluster_0	D1+ MSN	8str
Slc8a2	-0.269030415	3.3482e-77	Down	Cluster_0	D1+ MSN	8str
Sntg2	-0.334077297	2.92808e-69	Down	Cluster_0	D1+ MSN	8str
Sos2	0.276067868	4.76194e-64	Up	Cluster_0	D1+ MSN	8str
Sv2c	-0.26940945	2.83545e-56	Down	Cluster_0	D1+ MSN	8str
Tcp11l1	0.250607778	3.45238e-58	Up	Cluster_0	D1+ MSN	8str
Tesc	-0.323169233	1.5821e-102	Down	Cluster_0	D1+ MSN	8str
Tgfa	-0.276576059	6.89851e-55	Down	Cluster_0	D1+ MSN	8str
Ttc28	0.286867524	6.25627e-79	Up	Cluster_0	D1+ MSN	8str
Unc13b	0.255282719	6.27056e-54	Up	Cluster_0	D1+ MSN	8str
Ust	0.287063359	1.28501e-37	Up	Cluster_0	D1+ MSN	8str
Ywhae	0.252514739	3.95692e-56	Up	Cluster_0	D1+ MSN	8str
Malat1	-0.765367512	0	Down	Cluster_1	D2+ MSN	12str
Tpk1	0.369035316	5.86E-68	Up	Cluster_1	D2+ MSN	12str
Gm26835	-0.281641882	3.2E-66	Down	Cluster_1	D2+ MSN	12str
Guf1	0.432416988	1.36E-126	Up	Cluster_1	D2+ MSN	12str
Tra2a	0.337155856	1.62E-88	Up	Cluster_1	D2+ MSN	12str
Atad2b	0.37792011	6.89E-87	Up	Cluster_1	D2+ MSN	12str
Ccnl2	0.483579911	2.25E-171	Up	Cluster_1	D2+ MSN	12str
Crebzf	0.286434211	3.68E-56	Up	Cluster_1	D2+ MSN	12str
Dpyd	0.465561247	1.26E-84	Up	Cluster_1	D2+ MSN	12str
Edil3	0.313370976	1.46E-40	Up	Cluster_1	D2+ MSN	12str
Galnt18	-0.490316371	1.42E-101	Down	Cluster_1	D2+ MSN	12str
Ogt	0.33051621	1.61E-103	Up	Cluster_1	D2+ MSN	12str
Pde10a	-0.999975693	0	Down	Cluster_1	D2+ MSN	12str
Pdzd2	-0.806182223	2.07E-171	Down	Cluster_1	D2+ MSN	12str
Phactr1	-0.702725847	0	Down	Cluster_1	D2+ MSN	12str
Polr2a	0.460393146	7.63E-112	Up	Cluster_1	D2+ MSN	12str
Rsrc1	0.310001741	1.83E-57	Up	Cluster_1	D2+ MSN	12str
Sv2c	-0.301985488	2.04E-49	Down	Cluster_1	D2+ MSN	12str
2010300C02Rik	-0.396184555	2.65E-121	Down	Cluster_1	D2+ MSN	12str
A230006K03Rik	0.479888341	2.06E-152	Up	Cluster_1	D2+ MSN	12str
Acyp2	0.360965592	1.35E-72	Up	Cluster_1	D2+ MSN	12str
Adcy5	-0.915989501	0	Down	Cluster_1	D2+ MSN	12str
Camk2d	0.336847966	1.3E-71	Up	Cluster_1	D2+ MSN	12str
Ccser1	0.286923987	1.73E-116	Up	Cluster_1	D2+ MSN	12str
Celf2	-0.386875042	0	Down	Cluster_1	D2+ MSN	12str
Cfap54	-0.548483232	3.15E-128	Down	Cluster_1	D2+ MSN	12str
Chuk	0.291817639	8.63E-59	Up	Cluster_1	D2+ MSN	12str
Ckb	-0.406446174	2.43E-95	Down	Cluster_1	D2+ MSN	12str
Ddx5	0.318252036	4.79E-105	Up	Cluster_1	D2+ MSN	12str
Fam155a	0.517431772	1.5E-146	Up	Cluster_1	D2+ MSN	12str
Gm20754	0.58416203	1.19E-140	Up	Cluster_1	D2+ MSN	12str
Grik2	-0.311016581	1.58E-132	Down	Cluster_1	D2+ MSN	12str
Grip1	0.37749826	4.62E-119	Up	Cluster_1	D2+ MSN	12str
Kazn	-0.339552864	3.91E-72	Down	Cluster_1	D2+ MSN	12str
Kcnab1	-0.344742016	5.57E-111	Down	Cluster_1	D2+ MSN	12str
Kcnq1ot1	0.353800704	3.37E-124	Up	Cluster_1	D2+ MSN	12str
Magi2	0.303290282	1.01E-170	Up	Cluster_1	D2+ MSN	12str
Mapk4	-0.413765012	1.82E-64	Down	Cluster_1	D2+ MSN	12str
Meg3	0.44067191	0	Up	Cluster_1	D2+ MSN	12str
Nrg1	-0.323192056	1.52E-153	Down	Cluster_1	D2+ MSN	12str
Pafah1b1	0.367134518	1.34E-112	Up	Cluster_1	D2+ MSN	12str
Pde1c	-0.664432468	1.57E-67	Down	Cluster_1	D2+ MSN	12str
Pde2a	-0.602687762	5.71E-246	Down	Cluster_1	D2+ MSN	12str
Plcb1	-0.311719568	9.15E-116	Down	Cluster_1	D2+ MSN	12str
Ryr3	-0.384463856	1.76E-156	Down	Cluster_1	D2+ MSN	12str
Sfmbt2	0.656409002	2.92E-248	Up	Cluster_1	D2+ MSN	12str
Trpm3	-0.306949566	0.0000071	Down	Cluster_1	D2+ MSN	12str
2210408I21Rik	0.276140704	2.27E-38	Up	Cluster_1	D2+ MSN	12str
9630028H03Rik	-0.478997166	3.64E-85	Down	Cluster_1	D2+ MSN	12str
A330015K06Rik	-0.459326498	1.5E-127	Down	Cluster_1	D2+ MSN	12str
A930015D03Rik	0.280425886	3.27E-55	Up	Cluster_1	D2+ MSN	12str
Adgrb1	-0.294220781	1.15E-59	Down	Cluster_1	D2+ MSN	12str
Aig1	0.255376546	4.52E-39	Up	Cluster_1	D2+ MSN	12str
Ank2	0.296311499	6.3E-123	Up	Cluster_1	D2+ MSN	12str
Arid5b	0.478628942	8.13E-101	Up	Cluster_1	D2+ MSN	12str
Baiap2	-0.376893894	3.58E-118	Down	Cluster_1	D2+ MSN	12str
Brinp3	0.427360466	6.1E-72	Up	Cluster_1	D2+ MSN	12str
Cacna2d3	-0.451156981	0	Down	Cluster_1	D2+ MSN	12str
Cacnb2	-0.768360386	7.34E-292	Down	Cluster_1	D2+ MSN	12str
Camk2b	-0.593270255	1.79E-258	Down	Cluster_1	D2+ MSN	12str
Ccdc58	0.405921026	7.74E-98	Up	Cluster_1	D2+ MSN	12str
Cdh13	-0.588198749	3.4E-78	Down	Cluster_1	D2+ MSN	12str
Cnksr2	-0.264195041	6.54E-75	Down	Cluster_1	D2+ MSN	12str
Cntn6	0.347414399	1.57E-58	Up	Cluster_1	D2+ MSN	12str
Dclk1	-0.312818642	5.36E-101	Down	Cluster_1	D2+ MSN	12str
Dmd	0.285101459	1.74E-93	Up	Cluster_1	D2+ MSN	12str
Erc2	-0.367467663	2.38E-204	Down	Cluster_1	D2+ MSN	12str
Frmd4a	0.47848975	2.5E-199	Up	Cluster_1	D2+ MSN	12str
Gabra2	0.270032244	3.47E-55	Up	Cluster_1	D2+ MSN	12str
Gm13052	-0.508509567	1.76E-146	Down	Cluster_1	D2+ MSN	12str
Gm15810	-0.547354384	5.24E-180	Down	Cluster_1	D2+ MSN	12str
Gm21954	-0.342000626	8.57E-78	Down	Cluster_1	D2+ MSN	12str
Gm30382	0.398430996	8.06E-62	Up	Cluster_1	D2+ MSN	12str
Gng7	-0.461329807	1.81E-198	Down	Cluster_1	D2+ MSN	12str
Gpr158	-0.369737856	3.51E-131	Down	Cluster_1	D2+ MSN	12str
Inf2	-0.673477159	3.86E-249	Down	Cluster_1	D2+ MSN	12str
Itga9	-0.513907488	1.43E-104	Down	Cluster_1	D2+ MSN	12str
Kcnip3	-0.493059167	2.77E-122	Down	Cluster_1	D2+ MSN	12str
Kcnq3	-0.384737168	4.13E-103	Down	Cluster_1	D2+ MSN	12str
Kif21a	0.266212661	1.16E-60	Up	Cluster_1	D2+ MSN	12str
Lsamp	0.292870067	5.79E-150	Up	Cluster_1	D2+ MSN	12str
Mgat4c	0.616620261	3.27E-274	Up	Cluster_1	D2+ MSN	12str
Nav3	0.314162961	2.05E-89	Up	Cluster_1	D2+ MSN	12str
Ncor1	0.280082981	4.39E-69	Up	Cluster_1	D2+ MSN	12str
Neto1	-0.267835757	4.14E-40	Down	Cluster_1	D2+ MSN	12str
Nr6a1	0.432147353	6.72E-114	Up	Cluster_1	D2+ MSN	12str
Nrxn1	0.429114803	7.67E-225	Up	Cluster_1	D2+ MSN	12str
Osbpl8	-0.477847058	1.74E-146	Down	Cluster_1	D2+ MSN	12str
Pcsk2	-0.369326619	6.26E-129	Down	Cluster_1	D2+ MSN	12str
Pde7b	-0.501550635	6.26E-175	Down	Cluster_1	D2+ MSN	12str
Pitpnm2	-0.456045406	1.44E-86	Down	Cluster_1	D2+ MSN	12str
Pla2g3	-0.290524801	1.3E-72	Down	Cluster_1	D2+ MSN	12str
Ppp1r16b	-0.399025677	1.65E-90	Down	Cluster_1	D2+ MSN	12str
Prickle2	0.438854758	2.03E-121	Up	Cluster_1	D2+ MSN	12str
Ptk2b	-0.276239946	2.07E-57	Down	Cluster_1	D2+ MSN	12str
Ptpn5	-0.441838489	1.88E-123	Down	Cluster_1	D2+ MSN	12str
Ranbp17	0.356658743	4.16E-78	Up	Cluster_1	D2+ MSN	12str
Rap1gap	-0.603764531	1.58E-234	Down	Cluster_1	D2+ MSN	12str
Rbfox1	-0.339379355	1.67E-199	Down	Cluster_1	D2+ MSN	12str
Rcan2	-0.334479193	2.59E-73	Down	Cluster_1	D2+ MSN	12str
Rgs9	-0.877371999	0	Down	Cluster_1	D2+ MSN	12str
Ryr1	-0.3545606	3.59E-117	Down	Cluster_1	D2+ MSN	12str
Scaper	0.386841173	1.78E-108	Up	Cluster_1	D2+ MSN	12str
Scn9a	0.427822186	1.93E-101	Up	Cluster_1	D2+ MSN	12str
Sema6d	0.292901928	3.59E-62	Up	Cluster_1	D2+ MSN	12str
Sgk1	-0.465299459	1.3E-86	Down	Cluster_1	D2+ MSN	12str
Slc24a2	-0.333931329	7.73E-69	Down	Cluster_1	D2+ MSN	12str
Slc4a4	-0.42939736	9.45E-137	Down	Cluster_1	D2+ MSN	12str
Sobp	0.473655325	4.12E-106	Up	Cluster_1	D2+ MSN	12str
Sorbs1	-0.303499803	2.72E-54	Down	Cluster_1	D2+ MSN	12str
Strn3	0.308885258	9.28E-75	Up	Cluster_1	D2+ MSN	12str
Stxbp6	0.330706034	4.8E-46	Up	Cluster_1	D2+ MSN	12str
Taf15	0.295639335	1.25E-57	Up	Cluster_1	D2+ MSN	12str
Tenm2	0.256665516	3.04E-48	Up	Cluster_1	D2+ MSN	12str
Tmem117	0.431608524	1.54E-112	Up	Cluster_1	D2+ MSN	12str
Tmem191c	-0.423875391	1.05E-128	Down	Cluster_1	D2+ MSN	12str
Tmod1	-0.520770382	3.4E-168	Down	Cluster_1	D2+ MSN	12str
Zdhhc14	-0.281809781	2.77E-35	Down	Cluster_1	D2+ MSN	12str
Zswim6	-0.499954783	9.9E-144	Down	Cluster_1	D2+ MSN	12str
2410089E03Rik	0.250584395	5.04E-52	Up	Cluster_1	D2+ MSN	12str
4930448N21Rik	-0.313560756	5.54E-83	Down	Cluster_1	D2+ MSN	12str
4930578G10Rik	-0.325877684	5.91E-76	Down	Cluster_1	D2+ MSN	12str
5330417C22Rik	-0.394614655	6.33E-95	Down	Cluster_1	D2+ MSN	12str
A330008L17Rik	-0.493192791	5.39E-97	Down	Cluster_1	D2+ MSN	12str
Adam12	-0.301750311	8.6E-46	Down	Cluster_1	D2+ MSN	12str
Agbl4	0.577394675	2.73E-195	Up	Cluster_1	D2+ MSN	12str
Anks1b	-0.407574035	1.47E-265	Down	Cluster_1	D2+ MSN	12str
Apc	0.257947544	4.23E-68	Up	Cluster_1	D2+ MSN	12str
Baz2b	0.34662656	8.08E-89	Up	Cluster_1	D2+ MSN	12str
Bbx	0.265741003	2.33E-44	Up	Cluster_1	D2+ MSN	12str
Cacna1a	0.266671362	1.35E-81	Up	Cluster_1	D2+ MSN	12str
Cacna1e	-0.371114571	3.24E-166	Down	Cluster_1	D2+ MSN	12str
Cacng4	-0.436578931	1.18E-111	Down	Cluster_1	D2+ MSN	12str
Camk4	-0.521832147	5.22E-191	Down	Cluster_1	D2+ MSN	12str
Camkv	-0.523558459	6.54E-185	Down	Cluster_1	D2+ MSN	12str
Car11	-0.398175051	6.11E-113	Down	Cluster_1	D2+ MSN	12str
Ccdc85a	0.356709871	1.24E-64	Up	Cluster_1	D2+ MSN	12str
Ccdc88c	-0.371932179	2.22E-81	Down	Cluster_1	D2+ MSN	12str
Cdh18	0.716184825	9.9E-172	Up	Cluster_1	D2+ MSN	12str
Clasp2	0.278362178	1.05E-62	Up	Cluster_1	D2+ MSN	12str
Cpeb3	0.310319169	2.08E-70	Up	Cluster_1	D2+ MSN	12str
Cpne5	-0.281034636	4.33E-66	Down	Cluster_1	D2+ MSN	12str
Crebbp	0.259518695	1.49E-58	Up	Cluster_1	D2+ MSN	12str
Dfna5	-0.295316221	4.61E-42	Down	Cluster_1	D2+ MSN	12str
Dgkb	-0.324622759	1.37E-170	Down	Cluster_1	D2+ MSN	12str
Dlc1	0.323092693	2.38E-48	Up	Cluster_1	D2+ MSN	12str
Dnajc1	0.281017644	9.65E-64	Up	Cluster_1	D2+ MSN	12str
Dpp10	-0.33934974	7.22E-35	Down	Cluster_1	D2+ MSN	12str
Dync1i1	0.31691324	1.67E-61	Up	Cluster_1	D2+ MSN	12str
Eml6	0.290375056	1.65E-66	Up	Cluster_1	D2+ MSN	12str
Enah	0.417450124	9.16E-126	Up	Cluster_1	D2+ MSN	12str
Exoc6b	0.349061734	1.65E-104	Up	Cluster_1	D2+ MSN	12str
Fgd4	0.266550648	1.11E-46	Up	Cluster_1	D2+ MSN	12str
Fmnl2	0.507283413	1.73E-115	Up	Cluster_1	D2+ MSN	12str
Foxn3	0.321222542	1.07E-54	Up	Cluster_1	D2+ MSN	12str
Fstl4	-0.369450447	7.41E-68	Down	Cluster_1	D2+ MSN	12str
Fstl5	0.30821099	9.69E-44	Up	Cluster_1	D2+ MSN	12str
Gbf1	0.344657956	3.93E-81	Up	Cluster_1	D2+ MSN	12str
Gdpd5	-0.276518151	2.02E-63	Down	Cluster_1	D2+ MSN	12str
Gigyf2	0.284902449	3.35E-55	Up	Cluster_1	D2+ MSN	12str
Gm10848	-0.653557348	4.19E-183	Down	Cluster_1	D2+ MSN	12str
Gm13974	-0.320957115	1.59E-51	Down	Cluster_1	D2+ MSN	12str
Gm27247	-0.51316144	3.45E-101	Down	Cluster_1	D2+ MSN	12str
Gm28494	-0.381862981	1.07E-88	Down	Cluster_1	D2+ MSN	12str
Gm28609	-0.293181127	1.33E-71	Down	Cluster_1	D2+ MSN	12str
Gmds	0.447679363	1.42E-125	Up	Cluster_1	D2+ MSN	12str
Gnaq	0.313275539	7.88E-80	Up	Cluster_1	D2+ MSN	12str
Gpc6	0.463345368	4.5E-107	Up	Cluster_1	D2+ MSN	12str
Gpm6a	0.288883003	2.55E-70	Up	Cluster_1	D2+ MSN	12str
Gpm6b	-0.376782787	1.52E-99	Down	Cluster_1	D2+ MSN	12str
Gprin3	-0.403904304	1.4E-67	Down	Cluster_1	D2+ MSN	12str
Grm1	-0.487859083	1.83E-136	Down	Cluster_1	D2+ MSN	12str
Grm3	-0.393239539	1.28E-65	Down	Cluster_1	D2+ MSN	12str
Gsg1l	-0.89094853	0	Down	Cluster_1	D2+ MSN	12str
Gtdc1	0.328257932	2.17E-57	Up	Cluster_1	D2+ MSN	12str
Htr4	-0.539174143	4.23E-109	Down	Cluster_1	D2+ MSN	12str
Igsf21	-0.305954059	3.32E-109	Down	Cluster_1	D2+ MSN	12str
Ivns1abp	-0.319414425	1.36E-45	Down	Cluster_1	D2+ MSN	12str
Jakmip1	-0.280203499	1.17E-65	Down	Cluster_1	D2+ MSN	12str
Kcnh3	-0.252788921	3.13E-55	Down	Cluster_1	D2+ MSN	12str
Kcnip2	-0.510366874	1.06E-162	Down	Cluster_1	D2+ MSN	12str
Kcnk2	-0.404742527	9.9E-77	Down	Cluster_1	D2+ MSN	12str
Kcnq5	-0.260190059	2.95E-75	Down	Cluster_1	D2+ MSN	12str
Klf12	0.325418358	2.05E-54	Up	Cluster_1	D2+ MSN	12str
Klhl2	-0.287578066	3.95E-42	Down	Cluster_1	D2+ MSN	12str
Ldlrad4	-0.601855106	8.44E-83	Down	Cluster_1	D2+ MSN	12str
Lrrk2	-0.491968209	2.08E-114	Down	Cluster_1	D2+ MSN	12str
Lrtm1	-0.416636421	4.47E-90	Down	Cluster_1	D2+ MSN	12str
Mast2	0.360353217	1.45E-75	Up	Cluster_1	D2+ MSN	12str
Meis1	0.361023526	1.06E-53	Up	Cluster_1	D2+ MSN	12str
Mpp7	-0.717750999	1.48E-240	Down	Cluster_1	D2+ MSN	12str
Mtcl1	-0.25342045	3.17E-38	Down	Cluster_1	D2+ MSN	12str
Ndrg4	-0.280844471	2.84E-44	Down	Cluster_1	D2+ MSN	12str
Ngef	-0.367447758	1.63E-88	Down	Cluster_1	D2+ MSN	12str
Nnat	-0.28263259	6.48E-27	Down	Cluster_1	D2+ MSN	12str
Npas2	-0.718943912	7.77E-262	Down	Cluster_1	D2+ MSN	12str
Npas3	0.252553921	6.42E-67	Up	Cluster_1	D2+ MSN	12str
Osbp2	-0.251463668	1.03E-35	Down	Cluster_1	D2+ MSN	12str
Parp8	0.3177974	1.61E-64	Up	Cluster_1	D2+ MSN	12str
Pcdh10	0.281200466	1.14E-39	Up	Cluster_1	D2+ MSN	12str
Pde1b	-0.471844361	5.18E-153	Down	Cluster_1	D2+ MSN	12str
Pde4a	-0.415075671	2.3E-99	Down	Cluster_1	D2+ MSN	12str
Peli2	-0.500825515	9.59E-120	Down	Cluster_1	D2+ MSN	12str
Pmepa1	-0.455437695	1.6E-112	Down	Cluster_1	D2+ MSN	12str
Ppfia2	0.274465593	9.16E-76	Up	Cluster_1	D2+ MSN	12str
Ppp1r2	-0.288138795	2.21E-35	Down	Cluster_1	D2+ MSN	12str
Ppp2r3a	0.41409396	3.1E-96	Up	Cluster_1	D2+ MSN	12str
Ppp3ca	-0.409950841	5.24E-280	Down	Cluster_1	D2+ MSN	12str
Prkcb	-0.486115629	2.02E-204	Down	Cluster_1	D2+ MSN	12str
Rap1gapos	-0.371036059	2.43E-141	Down	Cluster_1	D2+ MSN	12str
Rerg	-0.288454242	1.23E-34	Down	Cluster_1	D2+ MSN	12str
Rgs20	-0.274351408	7.98E-27	Down	Cluster_1	D2+ MSN	12str
Rgs7bp	-0.309250045	4.21E-68	Down	Cluster_1	D2+ MSN	12str
Rhbdl3	-0.251149385	7.32E-41	Down	Cluster_1	D2+ MSN	12str
Ror1	-0.809962599	1.44E-242	Down	Cluster_1	D2+ MSN	12str
Rufy3	0.270548375	2.06E-51	Up	Cluster_1	D2+ MSN	12str
Sec14l1	-0.407119173	1.23E-111	Down	Cluster_1	D2+ MSN	12str
Sema3a	0.363696533	2.68E-57	Up	Cluster_1	D2+ MSN	12str
Sez6	-0.527801765	8.59E-171	Down	Cluster_1	D2+ MSN	12str
Sgk3	-0.28122111	9.53E-50	Down	Cluster_1	D2+ MSN	12str
Slc25a13	0.258670269	3.43E-37	Up	Cluster_1	D2+ MSN	12str
Slc35f3	-0.253334911	1.91E-39	Down	Cluster_1	D2+ MSN	12str
Snrnp70	0.295227872	1.05E-91	Up	Cluster_1	D2+ MSN	12str
Sorcs2	-0.637741431	9.68E-163	Down	Cluster_1	D2+ MSN	12str
Sos2	0.318257996	3.63E-60	Up	Cluster_1	D2+ MSN	12str
Spata7	0.324301172	1.35E-60	Up	Cluster_1	D2+ MSN	12str
Spock3	-0.401159392	6.64E-134	Down	Cluster_1	D2+ MSN	12str
Srgap1	-0.250727467	2.23E-23	Down	Cluster_1	D2+ MSN	12str
Srgap2	0.295320047	3.33E-61	Up	Cluster_1	D2+ MSN	12str
Ssbp4	-0.324971005	1.95E-69	Down	Cluster_1	D2+ MSN	12str
Stk32a	-0.371718756	1.25E-61	Down	Cluster_1	D2+ MSN	12str
Tcf4	0.362416438	4.56E-68	Up	Cluster_1	D2+ MSN	12str
Tenm3	0.313561006	2.13E-41	Up	Cluster_1	D2+ MSN	12str
Thsd7a	-0.390374807	1.42E-56	Down	Cluster_1	D2+ MSN	12str
Tnrc6b	0.310231841	5.58E-85	Up	Cluster_1	D2+ MSN	12str
Trim9	-0.300877548	6.41E-54	Down	Cluster_1	D2+ MSN	12str
Ttyh1	-0.250166447	5.14E-43	Down	Cluster_1	D2+ MSN	12str
Unc13b	0.284803023	7.1E-52	Up	Cluster_1	D2+ MSN	12str
Unc13c	-0.421204671	4.85E-63	Down	Cluster_1	D2+ MSN	12str
Usp34	0.300302888	1.12E-78	Up	Cluster_1	D2+ MSN	12str
Vat1l	-0.296066148	2.03E-25	Down	Cluster_1	D2+ MSN	12str
Vsnl1	0.357960828	1.77E-66	Up	Cluster_1	D2+ MSN	12str
Zfhx4	0.307294721	4.9E-58	Up	Cluster_1	D2+ MSN	12str
Zfp608	0.301911437	6.55E-43	Up	Cluster_1	D2+ MSN	12str
Zfyve28	-0.457016689	6.22E-131	Down	Cluster_1	D2+ MSN	12str
Zmynd8	-0.348052227	6.03E-77	Down	Cluster_1	D2+ MSN	12str
0610043K17Rik	0.259433932	2.45E-41	Up	Cluster_1	D2+ MSN	12str
2610037D02Rik	0.307409184	1.08E-50	Up	Cluster_1	D2+ MSN	12str
2900055J20Rik	-0.275901036	3.78E-48	Down	Cluster_1	D2+ MSN	12str
4930402H24Rik	0.254750896	1.52E-71	Up	Cluster_1	D2+ MSN	12str
4930509J09Rik	0.330140962	1.5E-56	Up	Cluster_1	D2+ MSN	12str
A330102I10Rik	0.308795981	1.65E-43	Up	Cluster_1	D2+ MSN	12str
Ablim1	0.308303552	5.83E-54	Up	Cluster_1	D2+ MSN	12str
Actn2	-0.435067055	1.95E-98	Down	Cluster_1	D2+ MSN	12str
Acvr1c	-0.336536876	2.1E-55	Down	Cluster_1	D2+ MSN	12str
Adamts6	0.311215326	2.54E-58	Up	Cluster_1	D2+ MSN	12str
Adgrl2	0.255757281	1.26E-35	Up	Cluster_1	D2+ MSN	12str
Agfg2	-0.26389128	5.06E-44	Down	Cluster_1	D2+ MSN	12str
Agk	0.277911373	3.02E-49	Up	Cluster_1	D2+ MSN	12str
Ankrd12	0.300001031	3.59E-69	Up	Cluster_1	D2+ MSN	12str
Ano2	-0.352578968	1.38E-61	Down	Cluster_1	D2+ MSN	12str
Ano3	-0.371534681	1.76E-96	Down	Cluster_1	D2+ MSN	12str
Ano4	0.308648434	1.9E-47	Up	Cluster_1	D2+ MSN	12str
Arhgap10	-0.416538174	7.22E-127	Down	Cluster_1	D2+ MSN	12str
Arhgap33	-0.301558725	4.36E-66	Down	Cluster_1	D2+ MSN	12str
Atf6	-0.428415678	3.36E-101	Down	Cluster_1	D2+ MSN	12str
Atp2b1	-0.457820998	7.51E-189	Down	Cluster_1	D2+ MSN	12str
Basp1	0.250539948	6.76E-33	Up	Cluster_1	D2+ MSN	12str
Bcl11b	-0.300853049	8.31E-63	Down	Cluster_1	D2+ MSN	12str
Bcr	-0.289714688	1.93E-63	Down	Cluster_1	D2+ MSN	12str
Bicd1	0.349691716	1.43E-90	Up	Cluster_1	D2+ MSN	12str
Btaf1	0.305346708	9.46E-66	Up	Cluster_1	D2+ MSN	12str
C2cd2	-0.272194469	7.16E-31	Down	Cluster_1	D2+ MSN	12str
Camk1d	-0.323245019	2.56E-86	Down	Cluster_1	D2+ MSN	12str
Camkk2	-0.339305596	1.19E-71	Down	Cluster_1	D2+ MSN	12str
Car12	-0.445203117	1.77E-148	Down	Cluster_1	D2+ MSN	12str
Ccdc88a	0.265347397	5.97E-52	Up	Cluster_1	D2+ MSN	12str
Ccm2	-0.252865581	2.38E-37	Down	Cluster_1	D2+ MSN	12str
Cdh12	0.444689354	1.14E-88	Up	Cluster_1	D2+ MSN	12str
Cdh4	-0.535842693	2.13E-57	Down	Cluster_1	D2+ MSN	12str
Cdk14	0.482638758	8.87E-124	Up	Cluster_1	D2+ MSN	12str
Cep164	0.367847389	1.5E-84	Up	Cluster_1	D2+ MSN	12str
Chd3	0.25638931	1.38E-43	Up	Cluster_1	D2+ MSN	12str
Chn1	-0.289271369	2.28E-66	Down	Cluster_1	D2+ MSN	12str
Cnr1	-0.658374948	5.51E-95	Down	Cluster_1	D2+ MSN	12str
Cntn5	-0.368589536	1.85E-39	Down	Cluster_1	D2+ MSN	12str
Crocc	-0.367678539	1.75E-97	Down	Cluster_1	D2+ MSN	12str
Csf2ra	0.281841053	7.84E-54	Up	Cluster_1	D2+ MSN	12str
Cyld	-0.267653227	3.1E-56	Down	Cluster_1	D2+ MSN	12str
D030068K23Rik	0.363438686	5.61E-65	Up	Cluster_1	D2+ MSN	12str
Dennd1b	0.326508171	2.85E-66	Up	Cluster_1	D2+ MSN	12str
Dlgap3	-0.310465853	1.29E-58	Down	Cluster_1	D2+ MSN	12str
Dnajc6	0.273936118	1.92E-53	Up	Cluster_1	D2+ MSN	12str
Dpy19l3	-0.330684067	1.63E-64	Down	Cluster_1	D2+ MSN	12str
Efna5	0.255041416	2.99E-24	Up	Cluster_1	D2+ MSN	12str
Ehbp1	0.29509299	2.2E-65	Up	Cluster_1	D2+ MSN	12str
Eif4g3	0.315338672	5.2E-76	Up	Cluster_1	D2+ MSN	12str
Elmod1	-0.340142571	2.16E-119	Down	Cluster_1	D2+ MSN	12str
Eml1	-0.288054886	1.02E-36	Down	Cluster_1	D2+ MSN	12str
Epb41l4b	0.295497458	2.84E-58	Up	Cluster_1	D2+ MSN	12str
Fam126a	0.344360452	7.22E-65	Up	Cluster_1	D2+ MSN	12str
Fam172a	0.283237288	1.32E-59	Up	Cluster_1	D2+ MSN	12str
Fam184b	-0.323256821	2.27E-71	Down	Cluster_1	D2+ MSN	12str
Fam193a	0.27150321	3.08E-63	Up	Cluster_1	D2+ MSN	12str
Fam196b	0.359012811	5.95E-92	Up	Cluster_1	D2+ MSN	12str
Fmn2	0.286428243	2.68E-60	Up	Cluster_1	D2+ MSN	12str
Foxo1	-0.380214481	4.06E-63	Down	Cluster_1	D2+ MSN	12str
Frmd4b	-0.267005754	3.57E-21	Down	Cluster_1	D2+ MSN	12str
Gabrd	-0.430224379	5.58E-131	Down	Cluster_1	D2+ MSN	12str
Gli3	-0.408632981	2.91E-61	Down	Cluster_1	D2+ MSN	12str
Gm10419	-0.280620393	2.62E-63	Down	Cluster_1	D2+ MSN	12str
Gm1043	-0.298508099	1.09E-58	Down	Cluster_1	D2+ MSN	12str
Gm13269	-0.585195666	2.26E-147	Down	Cluster_1	D2+ MSN	12str
Gm15813	-0.32100554	2.03E-89	Down	Cluster_1	D2+ MSN	12str
Gm21092	0.324902679	8.82E-87	Up	Cluster_1	D2+ MSN	12str
Gm28905	-0.33330946	2.26E-59	Down	Cluster_1	D2+ MSN	12str
Gnb5	-0.333912218	5.31E-70	Down	Cluster_1	D2+ MSN	12str
Homer1	-0.301248913	1.54E-71	Down	Cluster_1	D2+ MSN	12str
Hpca	-0.406612562	1.19E-112	Down	Cluster_1	D2+ MSN	12str
Htr2c	0.253190228	3.5E-30	Up	Cluster_1	D2+ MSN	12str
Icam5	-0.31670178	1.28E-85	Down	Cluster_1	D2+ MSN	12str
Iqgap2	-0.350775813	2.34E-63	Down	Cluster_1	D2+ MSN	12str
Irf2	0.285236025	3.72E-52	Up	Cluster_1	D2+ MSN	12str
Itga5	-0.260671551	1.8E-49	Down	Cluster_1	D2+ MSN	12str
Itgav	0.361129651	3.05E-67	Up	Cluster_1	D2+ MSN	12str
Itpka	-0.360012734	2.06E-109	Down	Cluster_1	D2+ MSN	12str
Itpr1	-0.542545961	1.69E-233	Down	Cluster_1	D2+ MSN	12str
Kansl1	0.27235138	1.57E-72	Up	Cluster_1	D2+ MSN	12str
Kcnh4	-0.478363685	1.47E-176	Down	Cluster_1	D2+ MSN	12str
Kcnt2	0.333270641	1.13E-53	Up	Cluster_1	D2+ MSN	12str
Klhdc10	0.306373778	9.69E-70	Up	Cluster_1	D2+ MSN	12str
Leng8	0.273984804	9.06E-52	Up	Cluster_1	D2+ MSN	12str
Lims1	0.284809651	6.49E-44	Up	Cluster_1	D2+ MSN	12str
Lin28b	0.265247731	5.09E-43	Up	Cluster_1	D2+ MSN	12str
Lpp	0.547667192	4.68E-178	Up	Cluster_1	D2+ MSN	12str
Lrfn5	0.262597237	6.68E-69	Up	Cluster_1	D2+ MSN	12str
Lynx1	-0.310336384	1.46E-90	Down	Cluster_1	D2+ MSN	12str
Lzts3	-0.252360821	1.64E-42	Down	Cluster_1	D2+ MSN	12str
Mgll	-0.322436668	2.01E-50	Down	Cluster_1	D2+ MSN	12str
Mhrt	-0.519181164	1.31E-107	Down	Cluster_1	D2+ MSN	12str
Mnat1	0.251257095	8.94E-39	Up	Cluster_1	D2+ MSN	12str
Mpp6	-0.271240826	1.54E-40	Down	Cluster_1	D2+ MSN	12str
Myo3b	-0.387878607	1.34E-41	Down	Cluster_1	D2+ MSN	12str
Necab2	-0.257367433	1.03E-49	Down	Cluster_1	D2+ MSN	12str
Neto2	-0.391212903	2.02E-64	Down	Cluster_1	D2+ MSN	12str
Nfyc	0.26346454	1.91E-43	Up	Cluster_1	D2+ MSN	12str
Nin	-0.315502375	2.64E-67	Down	Cluster_1	D2+ MSN	12str
Nsun7	0.47950162	2.43E-154	Up	Cluster_1	D2+ MSN	12str
Olfm3	0.360539349	5.62E-75	Up	Cluster_1	D2+ MSN	12str
Onecut2	0.40079079	7.77E-101	Up	Cluster_1	D2+ MSN	12str
Opcml	-0.282707887	1.59E-68	Down	Cluster_1	D2+ MSN	12str
P4ha1	-0.268141838	5.42E-23	Down	Cluster_1	D2+ MSN	12str
Pak7	0.292503199	1.51E-47	Up	Cluster_1	D2+ MSN	12str
Pcdh19	0.263668035	1.68E-46	Up	Cluster_1	D2+ MSN	12str
Pdss2	0.296983827	1.37E-50	Up	Cluster_1	D2+ MSN	12str
Pdzrn4	0.275490731	2.3E-25	Up	Cluster_1	D2+ MSN	12str
Penk	-0.703052255	3.18E-183	Down	Cluster_1	D2+ MSN	12str
Pnn	0.258395761	1.48E-42	Up	Cluster_1	D2+ MSN	12str
Pou6f2	0.294081399	3.37E-36	Up	Cluster_1	D2+ MSN	12str
Ppp1r1a	-0.433153983	1.67E-125	Down	Cluster_1	D2+ MSN	12str
Ppp1r1b	-0.288506981	6.73E-60	Down	Cluster_1	D2+ MSN	12str
Ppp4r4	-0.484844465	7.98E-136	Down	Cluster_1	D2+ MSN	12str
Prima1	-0.370865641	2.58E-120	Down	Cluster_1	D2+ MSN	12str
Prkd1	-0.378522961	7.64E-37	Down	Cluster_1	D2+ MSN	12str
Pura	0.30564168	1.28E-63	Up	Cluster_1	D2+ MSN	12str
Rab40b	-0.26014282	1.75E-43	Down	Cluster_1	D2+ MSN	12str
Rarb	-0.335411109	2.98E-87	Down	Cluster_1	D2+ MSN	12str
Rasd2	-0.310864281	2.28E-85	Down	Cluster_1	D2+ MSN	12str
Rasgef1a	-0.349932643	1.91E-87	Down	Cluster_1	D2+ MSN	12str
Rasgrp2	-0.499523408	3.65E-159	Down	Cluster_1	D2+ MSN	12str
Rbm39	0.252399677	1.75E-77	Up	Cluster_1	D2+ MSN	12str
Rbm5	0.289310858	8.02E-59	Up	Cluster_1	D2+ MSN	12str
Rgs11	-0.320462109	2.93E-117	Down	Cluster_1	D2+ MSN	12str
Rhobtb2	-0.442770048	3.52E-114	Down	Cluster_1	D2+ MSN	12str
Rit2	0.252686055	3.26E-51	Up	Cluster_1	D2+ MSN	12str
Rnf112	-0.362839442	4.94E-85	Down	Cluster_1	D2+ MSN	12str
Rnf144a	-0.396154592	7.24E-94	Down	Cluster_1	D2+ MSN	12str
Rnf150	-0.278021078	4.08E-45	Down	Cluster_1	D2+ MSN	12str
Rock1	0.296874124	1.61E-66	Up	Cluster_1	D2+ MSN	12str
RP23-231J2.1	0.505521447	6.77E-63	Up	Cluster_1	D2+ MSN	12str
RP24-134N2.1	-0.468410274	4.41E-109	Down	Cluster_1	D2+ MSN	12str
Rsrp1	0.319203476	4.5E-92	Up	Cluster_1	D2+ MSN	12str
Rtn3	0.28141024	6.57E-68	Up	Cluster_1	D2+ MSN	12str
Runx2	0.32658552	3.86E-63	Up	Cluster_1	D2+ MSN	12str
Sbf2	0.26638507	1.17E-61	Up	Cluster_1	D2+ MSN	12str
Scn4b	-0.526443037	2.82E-217	Down	Cluster_1	D2+ MSN	12str
Senp6	0.276340807	4.12E-54	Up	Cluster_1	D2+ MSN	12str
Sh3rf2	-0.31427578	1.62E-44	Down	Cluster_1	D2+ MSN	12str
Slc24a3	0.26797901	2.09E-30	Up	Cluster_1	D2+ MSN	12str
Slc24a4	-0.469609208	1.6E-109	Down	Cluster_1	D2+ MSN	12str
Slc44a5	0.372232946	1.03E-72	Up	Cluster_1	D2+ MSN	12str
Slc6a6	-0.417515834	5.87E-127	Down	Cluster_1	D2+ MSN	12str
Slc8a2	-0.308069537	2.62E-78	Down	Cluster_1	D2+ MSN	12str
Snrnp48	0.255737449	4.97E-43	Up	Cluster_1	D2+ MSN	12str
Sntb2	-0.35180583	3.91E-63	Down	Cluster_1	D2+ MSN	12str
Snx29	0.342080452	6.85E-78	Up	Cluster_1	D2+ MSN	12str
Sorbs2os	-0.316648838	8.12E-57	Down	Cluster_1	D2+ MSN	12str
Spata13	-0.371103313	2.3E-95	Down	Cluster_1	D2+ MSN	12str
Spata16	-0.309360316	1.3E-67	Down	Cluster_1	D2+ MSN	12str
St7	0.301295212	8.8E-66	Up	Cluster_1	D2+ MSN	12str
Stk3	0.397661332	1.75E-102	Up	Cluster_1	D2+ MSN	12str
Strn	-0.616192045	1.51E-175	Down	Cluster_1	D2+ MSN	12str
Stxbp4	0.279322627	4.29E-47	Up	Cluster_1	D2+ MSN	12str
Syndig1l	-0.288525534	7.73E-71	Down	Cluster_1	D2+ MSN	12str
Tbc1d4	-0.317189987	1.21E-60	Down	Cluster_1	D2+ MSN	12str
Tbc1d8	-0.438280863	3.35E-119	Down	Cluster_1	D2+ MSN	12str
Tesc	-0.391622764	1.2E-105	Down	Cluster_1	D2+ MSN	12str
Tiam1	-0.258354895	1.42E-29	Down	Cluster_1	D2+ MSN	12str
Tmem178b	0.320118459	4.09E-117	Up	Cluster_1	D2+ MSN	12str
Traip	-0.375667313	1.32E-106	Down	Cluster_1	D2+ MSN	12str
Trank1	-0.34917313	2.47E-102	Down	Cluster_1	D2+ MSN	12str
Ube3a	0.296567274	2.6E-104	Up	Cluster_1	D2+ MSN	12str
Uty	0.256777694	3.61E-36	Up	Cluster_1	D2+ MSN	12str
Vps54	0.254810145	4.07E-42	Up	Cluster_1	D2+ MSN	12str
Wipf3	-0.28243884	1.34E-32	Down	Cluster_1	D2+ MSN	12str
Zfhx3	0.275303442	1.01E-39	Up	Cluster_1	D2+ MSN	12str
Zfp207	0.270517766	1.67E-49	Up	Cluster_1	D2+ MSN	12str
Zfp804b	0.657941763	8.39E-69	Up	Cluster_1	D2+ MSN	12str
Zmat4	-0.314042076	3.44E-46	Down	Cluster_1	D2+ MSN	12str
Zmym4	0.362056009	1.38E-94	Up	Cluster_1	D2+ MSN	12str
Zranb2	0.25070207	1.4E-49	Up	Cluster_1	D2+ MSN	12str
1110051M20Rik	0.257287454	1.76E-53	Up	Cluster_1	D2+ MSN	12str
Adora2a	-0.601554131	1.18E-214	Down	Cluster_1	D2+ MSN	12str
Ambra1	0.251026565	9.58E-52	Up	Cluster_1	D2+ MSN	12str
Arpp19	-0.255113847	2.31E-40	Down	Cluster_1	D2+ MSN	12str
Bmp6	-0.276946112	2.11E-59	Down	Cluster_1	D2+ MSN	12str
Celf3	-0.278498526	2.28E-53	Down	Cluster_1	D2+ MSN	12str
Cspp1	0.262577692	1.59E-47	Up	Cluster_1	D2+ MSN	12str
Cul5	0.268948032	8.88E-48	Up	Cluster_1	D2+ MSN	12str
Cyp7b1	0.257636902	1.03E-38	Up	Cluster_1	D2+ MSN	12str
Dock2	0.264477251	2.05E-59	Up	Cluster_1	D2+ MSN	12str
Drd2	-0.563217331	5.8E-186	Down	Cluster_1	D2+ MSN	12str
Eda	0.310267626	2.95E-30	Up	Cluster_1	D2+ MSN	12str
Elavl2	0.290698636	2.46E-72	Up	Cluster_1	D2+ MSN	12str
Ep300	0.264247672	6.31E-44	Up	Cluster_1	D2+ MSN	12str
Exoc4	0.272836159	5.98E-84	Up	Cluster_1	D2+ MSN	12str
Frmd6	-0.260416394	5.38E-45	Down	Cluster_1	D2+ MSN	12str
Galnt14	-0.268237705	1E-40	Down	Cluster_1	D2+ MSN	12str
Garem	-0.270682196	1.61E-30	Down	Cluster_1	D2+ MSN	12str
Gkap1	0.282151389	8.61E-53	Up	Cluster_1	D2+ MSN	12str
Gm26699	0.254355981	1.24E-41	Up	Cluster_1	D2+ MSN	12str
Hcn1	0.29162381	2.68E-61	Up	Cluster_1	D2+ MSN	12str
Hjurp	0.253747121	2.66E-62	Up	Cluster_1	D2+ MSN	12str
Hook2	0.27451094	1.42E-52	Up	Cluster_1	D2+ MSN	12str
Nipbl	0.253451376	4.45E-44	Up	Cluster_1	D2+ MSN	12str
Oprd1	-0.363105658	1.15E-73	Down	Cluster_1	D2+ MSN	12str
Pan3	0.25660402	6.77E-53	Up	Cluster_1	D2+ MSN	12str
Phf20l1	0.282726752	5.07E-60	Up	Cluster_1	D2+ MSN	12str
Ppm1l	0.27056784	9.26E-48	Up	Cluster_1	D2+ MSN	12str
Ppp2r2a	-0.328664841	1.08E-65	Down	Cluster_1	D2+ MSN	12str
Ptbp2	0.253944685	1.91E-42	Up	Cluster_1	D2+ MSN	12str
Rab28	0.255799883	2.57E-38	Up	Cluster_1	D2+ MSN	12str
Ralyl	0.266993905	4.15E-43	Up	Cluster_1	D2+ MSN	12str
Rmdn1	0.271503523	7.54E-54	Up	Cluster_1	D2+ MSN	12str
Setbp1	0.30480677	8.86E-72	Up	Cluster_1	D2+ MSN	12str
Shtn1	0.261675921	5.01E-39	Up	Cluster_1	D2+ MSN	12str
Smurf1	-0.255333662	2.88E-40	Down	Cluster_1	D2+ MSN	12str
Srrt	-0.305242576	6.03E-55	Down	Cluster_1	D2+ MSN	12str
Srsf11	0.260338946	9.57E-55	Up	Cluster_1	D2+ MSN	12str
Stx16	0.281783282	4.59E-55	Up	Cluster_1	D2+ MSN	12str
Suv420h1	0.251257694	1.76E-42	Up	Cluster_1	D2+ MSN	12str
Synpo2	-0.347251806	2.81E-59	Down	Cluster_1	D2+ MSN	12str
Syp	0.251976985	4.61E-43	Up	Cluster_1	D2+ MSN	12str
Ust	0.29116925	1.48E-38	Up	Cluster_1	D2+ MSN	12str
Vezt	0.255374845	2.95E-45	Up	Cluster_1	D2+ MSN	12str
Zfp618	0.302725524	6.45E-67	Up	Cluster_1	D2+ MSN	12str
A930015D03Rik	0.380341018	3.88836e-82	Up	Cluster_2	D2+ MSN	8str
Ccnl2	0.478012238	1.579e-160	Up	Cluster_2	D2+ MSN	8str
Malat1	-0.547958448	0	Down	Cluster_2	D2+ MSN	8str
Rbm28	0.335910184	3.80391e-74	Up	Cluster_2	D2+ MSN	8str
Ddx5	0.425159226	5.4564e-150	Up	Cluster_2	D2+ MSN	8str
Kcnab1	-0.388174299	3.5235e-140	Down	Cluster_2	D2+ MSN	8str
Pafah1b1	0.406368335	8.5234e-126	Up	Cluster_2	D2+ MSN	8str
Tra2a	0.398208375	6.3795e-117	Up	Cluster_2	D2+ MSN	8str
Atad2b	0.302010599	8.12992e-54	Up	Cluster_2	D2+ MSN	8str
Celf2	-0.411888418	0	Down	Cluster_2	D2+ MSN	8str
Chuk	0.337073014	7.49299e-75	Up	Cluster_2	D2+ MSN	8str
Gpi1	0.302406945	1.3294e-58	Up	Cluster_2	D2+ MSN	8str
Nnat	-0.387337767	1.60881e-25	Down	Cluster_2	D2+ MSN	8str
Phactr1	-0.551262389	0	Down	Cluster_2	D2+ MSN	8str
Polr2a	0.318073043	1.73758e-60	Up	Cluster_2	D2+ MSN	8str
Slc15a2	0.304576822	2.31711e-73	Up	Cluster_2	D2+ MSN	8str
Son	0.311823952	9.61777e-89	Up	Cluster_2	D2+ MSN	8str
Taf15	0.378542179	3.024e-91	Up	Cluster_2	D2+ MSN	8str
Trpm3	-0.359790854	6.58833e-14	Down	Cluster_2	D2+ MSN	8str
A330015K06Rik	-0.36232138	1.63425e-75	Down	Cluster_2	D2+ MSN	8str
Ano4	0.299462723	7.7213e-50	Up	Cluster_2	D2+ MSN	8str
Ckb	-0.339561669	1.33795e-60	Down	Cluster_2	D2+ MSN	8str
Ckb	-0.339561669	1.33795e-60	Down	Cluster_2	D2+ MSN	8str
Dpyd	0.313844965	1.97245e-38	Up	Cluster_2	D2+ MSN	8str
Frmd4a	0.337853156	2.47757e-96	Up	Cluster_2	D2+ MSN	8str
Gm20754	0.567462742	6.951e-114	Up	Cluster_2	D2+ MSN	8str
Grik2	-0.319458671	3.7262e-146	Down	Cluster_2	D2+ MSN	8str
Grm3	-0.512970668	7.4491e-121	Down	Cluster_2	D2+ MSN	8str
Guf1	0.308766276	5.47362e-65	Up	Cluster_2	D2+ MSN	8str
Kcnj3	0.327324422	1.66726e-44	Up	Cluster_2	D2+ MSN	8str
Ldlrad4	-0.433745689	4.0502e-40	Down	Cluster_2	D2+ MSN	8str
Nr6a1	0.322475954	2.06841e-57	Up	Cluster_2	D2+ MSN	8str
Ogt	0.269804366	1.89356e-74	Up	Cluster_2	D2+ MSN	8str
Pdzd2	-0.28204682	3.87316e-28	Down	Cluster_2	D2+ MSN	8str
Ppp1r16b	-0.307797597	3.34649e-56	Down	Cluster_2	D2+ MSN	8str
Prpf4b	0.27734674	4.32736e-49	Up	Cluster_2	D2+ MSN	8str
Sfmbt2	0.606600749	1.6732e-191	Up	Cluster_2	D2+ MSN	8str
Strn3	0.255784703	8.17535e-53	Up	Cluster_2	D2+ MSN	8str
Stxbp6	0.312592405	2.82073e-35	Up	Cluster_2	D2+ MSN	8str
Thsd7a	-0.573985162	2.6532e-116	Down	Cluster_2	D2+ MSN	8str
Tmem117	0.326751818	2.17369e-61	Up	Cluster_2	D2+ MSN	8str
Ube3a	0.395239395	4.7771e-173	Up	Cluster_2	D2+ MSN	8str
A330008L17Rik	-0.454524183	6.72833e-76	Down	Cluster_2	D2+ MSN	8str
Acyp2	0.252436144	6.34281e-33	Up	Cluster_2	D2+ MSN	8str
Adcy5	-0.78628697	0	Down	Cluster_2	D2+ MSN	8str
Anks1b	-0.405707541	5.5991e-265	Down	Cluster_2	D2+ MSN	8str
Ano3	-0.269276704	3.83699e-38	Down	Cluster_2	D2+ MSN	8str
Arid5b	0.425728034	9.88313e-86	Up	Cluster_2	D2+ MSN	8str
Atp2b1	-0.349118561	2.2654e-108	Down	Cluster_2	D2+ MSN	8str
Baz2b	0.289817929	7.26796e-60	Up	Cluster_2	D2+ MSN	8str
Brinp3	0.293522668	4.79459e-31	Up	Cluster_2	D2+ MSN	8str
Cacna1e	-0.348974289	3.315e-141	Down	Cluster_2	D2+ MSN	8str
Cacna2d3	-0.404604329	1.1432e-256	Down	Cluster_2	D2+ MSN	8str
Cacnb2	-0.52376368	3.9603e-160	Down	Cluster_2	D2+ MSN	8str
Camk2b	-0.527431413	1.6686e-195	Down	Cluster_2	D2+ MSN	8str
Camkv	-0.450160034	7.6084e-146	Down	Cluster_2	D2+ MSN	8str
Ccdc58	0.346052594	3.1419e-65	Up	Cluster_2	D2+ MSN	8str
Cdh13	-0.431706382	1.91234e-47	Down	Cluster_2	D2+ MSN	8str
Cdh18	0.617077407	2.364e-126	Up	Cluster_2	D2+ MSN	8str
Cdk14	0.312816584	8.24264e-43	Up	Cluster_2	D2+ MSN	8str
Cntn4	-0.289967851	2.40744e-42	Down	Cluster_2	D2+ MSN	8str
Dgkb	-0.252555588	4.993e-106	Down	Cluster_2	D2+ MSN	8str
Dlc1	0.298234309	1.33422e-37	Up	Cluster_2	D2+ MSN	8str
Dlc1	0.298234309	1.33422e-37	Up	Cluster_2	D2+ MSN	8str
Fam155a	0.487094467	3.87855e-86	Up	Cluster_2	D2+ MSN	8str
Fmnl2	0.365684921	4.65742e-68	Up	Cluster_2	D2+ MSN	8str
Gm27247	-0.425090392	2.11438e-79	Down	Cluster_2	D2+ MSN	8str
Grip1	0.310102846	8.05519e-79	Up	Cluster_2	D2+ MSN	8str
Grip1	0.310102846	8.05519e-79	Up	Cluster_2	D2+ MSN	8str
Grm1	-0.427533409	2.72489e-81	Down	Cluster_2	D2+ MSN	8str
Grm5	-0.320236783	2.7581e-224	Down	Cluster_2	D2+ MSN	8str
Hap1	-0.257161896	3.22824e-30	Down	Cluster_2	D2+ MSN	8str
Hs6st3	-0.273696852	1.30349e-16	Down	Cluster_2	D2+ MSN	8str
Itpka	-0.281505201	3.48611e-64	Down	Cluster_2	D2+ MSN	8str
Kcnq5	-0.362506272	5.7289e-155	Down	Cluster_2	D2+ MSN	8str
Kirrel3	-0.255317186	9.51871e-48	Down	Cluster_2	D2+ MSN	8str
Lpp	0.42926919	1.4431e-107	Up	Cluster_2	D2+ MSN	8str
Lrch3	0.252814444	1.01466e-36	Up	Cluster_2	D2+ MSN	8str
Luc7l2	0.271112762	6.24329e-77	Up	Cluster_2	D2+ MSN	8str
Npas2	-0.588062501	5.8501e-177	Down	Cluster_2	D2+ MSN	8str
Opcml	-0.259510135	3.00595e-48	Down	Cluster_2	D2+ MSN	8str
Osbpl8	-0.403398945	8.1222e-108	Down	Cluster_2	D2+ MSN	8str
Parp8	0.368975266	5.34081e-79	Up	Cluster_2	D2+ MSN	8str
Pde10a	-0.847540643	0	Down	Cluster_2	D2+ MSN	8str
Pde1c	-0.610283727	2.03764e-58	Down	Cluster_2	D2+ MSN	8str
Ppfia2	0.252933218	7.06545e-65	Up	Cluster_2	D2+ MSN	8str
Ppp2r3a	0.333103521	7.41928e-58	Up	Cluster_2	D2+ MSN	8str
Ppp2r3a	0.333103521	7.41928e-58	Up	Cluster_2	D2+ MSN	8str
Prkcb	-0.314443816	1.43766e-70	Down	Cluster_2	D2+ MSN	8str
Rap1gap	-0.525266328	2.355e-179	Down	Cluster_2	D2+ MSN	8str
Rgs9	-0.700924966	2.291e-281	Down	Cluster_2	D2+ MSN	8str
Ryr3	-0.277968917	2.00583e-84	Down	Cluster_2	D2+ MSN	8str
Sez6	-0.474672834	6.1453e-131	Down	Cluster_2	D2+ MSN	8str
Slc24a2	-0.337598713	7.74724e-63	Down	Cluster_2	D2+ MSN	8str
Snhg11	0.325955445	6.35586e-52	Up	Cluster_2	D2+ MSN	8str
Sobp	0.388788303	1.77306e-73	Up	Cluster_2	D2+ MSN	8str
Tmod1	-0.251196095	1.37547e-41	Down	Cluster_2	D2+ MSN	8str
Unc13c	-0.298400593	4.69507e-36	Down	Cluster_2	D2+ MSN	8str
4930509J09Rik	0.355038702	4.09838e-57	Up	Cluster_2	D2+ MSN	8str
4930555F03Rik	0.263518301	6.99865e-24	Up	Cluster_2	D2+ MSN	8str
5330417C22Rik	-0.354266823	8.27632e-77	Down	Cluster_2	D2+ MSN	8str
A230006K03Rik	0.371337897	1.87545e-90	Up	Cluster_2	D2+ MSN	8str
Adam12	-0.260562042	8.78132e-19	Down	Cluster_2	D2+ MSN	8str
Apc	0.296340838	1.58871e-88	Up	Cluster_2	D2+ MSN	8str
Arhgap10	-0.347143407	2.43819e-77	Down	Cluster_2	D2+ MSN	8str
Arhgap10	-0.347143407	2.43819e-77	Down	Cluster_2	D2+ MSN	8str
Baiap2	-0.256447503	6.12876e-62	Down	Cluster_2	D2+ MSN	8str
Bicd1	0.313334782	2.31965e-70	Up	Cluster_2	D2+ MSN	8str
Cacng4	-0.300677536	3.83719e-55	Down	Cluster_2	D2+ MSN	8str
Camk4	-0.429937068	2.1614e-108	Down	Cluster_2	D2+ MSN	8str
Car11	-0.368450639	2.2566e-87	Down	Cluster_2	D2+ MSN	8str
Car11	-0.368450639	2.2566e-87	Down	Cluster_2	D2+ MSN	8str
Ccdc88c	-0.33560579	2.07934e-62	Down	Cluster_2	D2+ MSN	8str
Cdh11	-0.258758633	1.75246e-22	Down	Cluster_2	D2+ MSN	8str
Cnr1	-0.46395258	3.80941e-59	Down	Cluster_2	D2+ MSN	8str
Cnr1	-0.46395258	3.80941e-59	Down	Cluster_2	D2+ MSN	8str
Cntn5	-0.574771515	2.5785e-139	Down	Cluster_2	D2+ MSN	8str
Dpp10	-0.261752856	1.3575e-17	Down	Cluster_2	D2+ MSN	8str
Enah	0.383728647	4.03088e-92	Up	Cluster_2	D2+ MSN	8str
Epha5	0.272997486	1.90957e-34	Up	Cluster_2	D2+ MSN	8str
Exoc6b	0.25238117	1.52842e-52	Up	Cluster_2	D2+ MSN	8str
Fam126a	0.382544915	5.78104e-64	Up	Cluster_2	D2+ MSN	8str
Gkap1	0.264458471	2.73223e-43	Up	Cluster_2	D2+ MSN	8str
Gm15810	-0.338352352	4.96807e-68	Down	Cluster_2	D2+ MSN	8str
Gm26699	0.306291656	1.72674e-57	Up	Cluster_2	D2+ MSN	8str
Gm30382	0.302358543	1.67406e-34	Up	Cluster_2	D2+ MSN	8str
Gmds	0.268266545	1.01695e-45	Up	Cluster_2	D2+ MSN	8str
Gng7	-0.273161426	2.35085e-79	Down	Cluster_2	D2+ MSN	8str
Grin1	-0.253428527	3.30752e-70	Down	Cluster_2	D2+ MSN	8str
Grin1	-0.253428527	3.30752e-70	Down	Cluster_2	D2+ MSN	8str
Gsg1l	-0.661245878	1.3485e-225	Down	Cluster_2	D2+ MSN	8str
Htr4	-0.524157511	1.61233e-84	Down	Cluster_2	D2+ MSN	8str
Icam5	-0.260625464	1.9947e-55	Down	Cluster_2	D2+ MSN	8str
Inf2	-0.495673631	3.4777e-147	Down	Cluster_2	D2+ MSN	8str
Iqgap2	-0.345186376	5.94292e-61	Down	Cluster_2	D2+ MSN	8str
Kcnip2	-0.342965764	4.08798e-75	Down	Cluster_2	D2+ MSN	8str
Kcnip3	-0.365609013	1.12807e-67	Down	Cluster_2	D2+ MSN	8str
Kcnk2	-0.35424658	2.43832e-70	Down	Cluster_2	D2+ MSN	8str
L3mbtl3	0.346651645	4.15886e-50	Up	Cluster_2	D2+ MSN	8str
Lrrk2	-0.277167887	4.49953e-33	Down	Cluster_2	D2+ MSN	8str
Luzp1	0.254888626	5.65488e-33	Up	Cluster_2	D2+ MSN	8str
Lzts3	-0.253322401	1.06311e-44	Down	Cluster_2	D2+ MSN	8str
Mapk4	-0.311292497	7.66786e-37	Down	Cluster_2	D2+ MSN	8str
Mast2	0.256238708	3.28024e-37	Up	Cluster_2	D2+ MSN	8str
Mgat4c	0.41354115	1.5615e-128	Up	Cluster_2	D2+ MSN	8str
Mtcl1	-0.252564088	2.32697e-29	Down	Cluster_2	D2+ MSN	8str
Ncor1	0.258445654	1.00296e-53	Up	Cluster_2	D2+ MSN	8str
Neto1	-0.301841574	7.66336e-58	Down	Cluster_2	D2+ MSN	8str
Nrg1	-0.275044095	1.4605e-79	Down	Cluster_2	D2+ MSN	8str
Nrxn1	0.348735808	1.2837e-142	Up	Cluster_2	D2+ MSN	8str
Nsun7	0.356823166	6.92631e-78	Up	Cluster_2	D2+ MSN	8str
Ntm	-0.36097835	1.26569e-46	Down	Cluster_2	D2+ MSN	8str
Ntng1	0.25895124	9.93806e-24	Up	Cluster_2	D2+ MSN	8str
Onecut2	0.250992834	2.32232e-35	Up	Cluster_2	D2+ MSN	8str
Pard3	-0.255065575	2.81842e-67	Down	Cluster_2	D2+ MSN	8str
Pcdh9	0.267993259	2.44752e-46	Up	Cluster_2	D2+ MSN	8str
Pde1b	-0.428384114	1.0309e-118	Down	Cluster_2	D2+ MSN	8str
Pde2a	-0.347312962	1.20269e-89	Down	Cluster_2	D2+ MSN	8str
Pde4a	-0.262094269	1.49331e-41	Down	Cluster_2	D2+ MSN	8str
Pde7b	-0.330421255	9.9216e-104	Down	Cluster_2	D2+ MSN	8str
PISD	-0.334225036	7.44749e-17	Down	Cluster_2	D2+ MSN	8str
Pmepa1	-0.336099705	1.59213e-60	Down	Cluster_2	D2+ MSN	8str
Prickle2	0.307809558	6.82255e-61	Up	Cluster_2	D2+ MSN	8str
Ptpn5	-0.316276635	3.41417e-68	Down	Cluster_2	D2+ MSN	8str
Rarb	-0.328372817	4.29695e-81	Down	Cluster_2	D2+ MSN	8str
Rgs11	-0.290037375	8.5971e-86	Down	Cluster_2	D2+ MSN	8str
Rock1	0.295239729	8.03738e-57	Up	Cluster_2	D2+ MSN	8str
Ror1	-0.484957395	2.75406e-95	Down	Cluster_2	D2+ MSN	8str
Sgk1	-0.393119473	8.87258e-55	Down	Cluster_2	D2+ MSN	8str
Slc24a4	-0.302426006	7.78878e-32	Down	Cluster_2	D2+ MSN	8str
Slc4a4	-0.368358786	3.78214e-96	Down	Cluster_2	D2+ MSN	8str
Sorcs2	-0.437715815	2.99977e-83	Down	Cluster_2	D2+ MSN	8str
Spock3	-0.473478139	5.2169e-178	Down	Cluster_2	D2+ MSN	8str
Stk3	0.271712136	4.3295e-47	Up	Cluster_2	D2+ MSN	8str
Stk3	0.271712136	4.3295e-47	Up	Cluster_2	D2+ MSN	8str
Stk32a	-0.330105203	2.44423e-39	Down	Cluster_2	D2+ MSN	8str
Synpr	-0.272407361	1.49438e-25	Down	Cluster_2	D2+ MSN	8str
Tenm1	0.340875269	4.22077e-62	Up	Cluster_2	D2+ MSN	8str
Tmem178b	0.286249825	5.21171e-95	Up	Cluster_2	D2+ MSN	8str
Tmem191c	-0.307879282	1.37565e-74	Down	Cluster_2	D2+ MSN	8str
Zfhx4	0.307287762	1.46541e-49	Up	Cluster_2	D2+ MSN	8str
Zfp618	0.260175294	8.07586e-42	Up	Cluster_2	D2+ MSN	8str
Zfp804b	0.666153066	1.60992e-66	Up	Cluster_2	D2+ MSN	8str
Zfp950	0.25488681	1.83341e-36	Up	Cluster_2	D2+ MSN	8str
Zfyve28	-0.38397981	2.25655e-94	Down	Cluster_2	D2+ MSN	8str
Zswim6	-0.444237842	4.2532e-121	Down	Cluster_2	D2+ MSN	8str
4930448N21Rik	-0.251998602	2.21084e-50	Down	Cluster_2	D2+ MSN	8str
A830036E02Rik	0.311351577	7.85706e-53	Up	Cluster_2	D2+ MSN	8str
Ablim1	0.308703104	3.86198e-49	Up	Cluster_2	D2+ MSN	8str
Actn2	-0.340074187	6.62143e-62	Down	Cluster_2	D2+ MSN	8str
Acvr1c	-0.357927443	2.09896e-62	Down	Cluster_2	D2+ MSN	8str
Agbl4	0.376339306	3.66141e-81	Up	Cluster_2	D2+ MSN	8str
Agfg2	-0.260926151	6.52442e-40	Down	Cluster_2	D2+ MSN	8str
Ano2	-0.303427562	1.18475e-37	Down	Cluster_2	D2+ MSN	8str
Atf6	-0.296066164	1.9759e-45	Down	Cluster_2	D2+ MSN	8str
BC005561	0.307567695	6.2936e-57	Up	Cluster_2	D2+ MSN	8str
Bcl11b	-0.260913872	3.64592e-46	Down	Cluster_2	D2+ MSN	8str
Bmp6	-0.284330245	1.15822e-54	Down	Cluster_2	D2+ MSN	8str
Car12	-0.408501423	3.84957e-97	Down	Cluster_2	D2+ MSN	8str
Cdh12	0.261142294	8.54558e-31	Up	Cluster_2	D2+ MSN	8str
Cep164	0.281491825	3.09189e-51	Up	Cluster_2	D2+ MSN	8str
Crocc	-0.374198546	1.22693e-88	Down	Cluster_2	D2+ MSN	8str
Dclk1	-0.3018274	4.20008e-81	Down	Cluster_2	D2+ MSN	8str
Dnajc6	0.261056443	1.36648e-47	Up	Cluster_2	D2+ MSN	8str
Egfem1	-0.253888238	1.41599e-11	Down	Cluster_2	D2+ MSN	8str
Elmod1	-0.302537431	8.76184e-92	Down	Cluster_2	D2+ MSN	8str
Fam184b	-0.25189982	6.90324e-37	Down	Cluster_2	D2+ MSN	8str
Fam196b	0.340610141	7.70925e-73	Up	Cluster_2	D2+ MSN	8str
Foxo1	-0.471983411	1.85976e-97	Down	Cluster_2	D2+ MSN	8str
Frmd4b	-0.441811797	6.52621e-63	Down	Cluster_2	D2+ MSN	8str
Gabrd	-0.412360925	2.6052e-110	Down	Cluster_2	D2+ MSN	8str
Gigyf2	0.283030003	1.2432e-54	Up	Cluster_2	D2+ MSN	8str
Gli3	-0.296757713	2.63322e-35	Down	Cluster_2	D2+ MSN	8str
Gm1043	-0.252684512	1.06053e-33	Down	Cluster_2	D2+ MSN	8str
Gm21092	0.276096326	3.45363e-55	Up	Cluster_2	D2+ MSN	8str
Gm26804	0.288559269	5.6869e-62	Up	Cluster_2	D2+ MSN	8str
Gm28905	-0.282623934	9.1536e-30	Down	Cluster_2	D2+ MSN	8str
Gpm6b	-0.2520791	3.21741e-37	Down	Cluster_2	D2+ MSN	8str
Gprin3	-0.410909139	2.51806e-69	Down	Cluster_2	D2+ MSN	8str
Hcn1	0.457852643	2.3427e-102	Up	Cluster_2	D2+ MSN	8str
Homer1	-0.298461096	6.56023e-62	Down	Cluster_2	D2+ MSN	8str
Ildr2	0.282746652	1.4709e-35	Up	Cluster_2	D2+ MSN	8str
Itch	0.263800899	1.16323e-44	Up	Cluster_2	D2+ MSN	8str
Itga9	-0.316187313	4.60845e-51	Down	Cluster_2	D2+ MSN	8str
Itgav	0.262091133	4.25237e-30	Up	Cluster_2	D2+ MSN	8str
Itpr1	-0.372055828	2.1385e-117	Down	Cluster_2	D2+ MSN	8str
Ivns1abp	-0.25918363	5.89098e-26	Down	Cluster_2	D2+ MSN	8str
Kansl1	0.277674179	8.51242e-72	Up	Cluster_2	D2+ MSN	8str
Kcnh4	-0.386284319	4.8689e-122	Down	Cluster_2	D2+ MSN	8str
Kcnq1ot1	0.274858111	1.3491e-65	Up	Cluster_2	D2+ MSN	8str
Klhdc10	0.298949031	5.1637e-62	Up	Cluster_2	D2+ MSN	8str
Lars	0.259851981	1.94089e-43	Up	Cluster_2	D2+ MSN	8str
Limk2	0.271627372	3.34627e-49	Up	Cluster_2	D2+ MSN	8str
Lrig2	0.251141058	1.08507e-37	Up	Cluster_2	D2+ MSN	8str
Lynx1	-0.275720979	8.69174e-71	Down	Cluster_2	D2+ MSN	8str
Meg3	0.337493606	0	Up	Cluster_2	D2+ MSN	8str
Mhrt	-0.652553846	5.0446e-170	Down	Cluster_2	D2+ MSN	8str
Myo3b	-0.395562201	1.63313e-39	Down	Cluster_2	D2+ MSN	8str
Ndst3	0.271141124	1.71239e-34	Up	Cluster_2	D2+ MSN	8str
Neto2	-0.373941493	2.23693e-69	Down	Cluster_2	D2+ MSN	8str
Olfm3	0.357720723	7.31069e-73	Up	Cluster_2	D2+ MSN	8str
Penk	-0.816050564	1.6826e-229	Down	Cluster_2	D2+ MSN	8str
Plcb1	-0.306183463	2.53967e-89	Down	Cluster_2	D2+ MSN	8str
Ppp1r1a	-0.358657324	8.75813e-85	Down	Cluster_2	D2+ MSN	8str
Ppp1r1b	-0.252937473	1.92381e-45	Down	Cluster_2	D2+ MSN	8str
Ppp3ca	-0.369175173	2.5773e-199	Down	Cluster_2	D2+ MSN	8str
Ppp4r4	-0.409930579	1.58206e-90	Down	Cluster_2	D2+ MSN	8str
Prima1	-0.260255435	9.22937e-81	Down	Cluster_2	D2+ MSN	8str
Prkd1	-0.488855752	9.34719e-52	Down	Cluster_2	D2+ MSN	8str
Ranbp17	0.258288677	1.01897e-35	Up	Cluster_2	D2+ MSN	8str
Rasgef1a	-0.326457484	2.65501e-75	Down	Cluster_2	D2+ MSN	8str
Rasgrp2	-0.396365832	7.6051e-99	Down	Cluster_2	D2+ MSN	8str
Reln	-0.256499408	5.03226e-11	Down	Cluster_2	D2+ MSN	8str
Rhobtb2	-0.346377094	9.39602e-70	Down	Cluster_2	D2+ MSN	8str
Rnf112	-0.321612005	8.01385e-60	Down	Cluster_2	D2+ MSN	8str
Rnf144a	-0.323707121	2.37782e-70	Down	Cluster_2	D2+ MSN	8str
RP24-134N2.1	-0.444069636	5.7308e-85	Down	Cluster_2	D2+ MSN	8str
Runx2	0.345368631	4.84551e-67	Up	Cluster_2	D2+ MSN	8str
Scaper	0.30449229	7.83378e-65	Up	Cluster_2	D2+ MSN	8str
Scn4b	-0.526479568	6.643e-201	Down	Cluster_2	D2+ MSN	8str
Sec14l1	-0.364284991	1.19656e-74	Down	Cluster_2	D2+ MSN	8str
Senp6	0.271296815	1.40852e-45	Up	Cluster_2	D2+ MSN	8str
Slc24a3	0.274175048	4.07668e-40	Up	Cluster_2	D2+ MSN	8str
Slc6a6	-0.397246475	5.3666e-114	Down	Cluster_2	D2+ MSN	8str
Snrnp70	0.305090025	2.19936e-94	Up	Cluster_2	D2+ MSN	8str
St7	0.304478949	2.77436e-61	Up	Cluster_2	D2+ MSN	8str
Strn	-0.563111586	3.2685e-143	Down	Cluster_2	D2+ MSN	8str
Stx16	0.286665098	6.71411e-53	Up	Cluster_2	D2+ MSN	8str
Syndig1l	-0.32913776	4.64255e-89	Down	Cluster_2	D2+ MSN	8str
Tbc1d8	-0.356261408	2.80861e-77	Down	Cluster_2	D2+ MSN	8str
Traip	-0.437970546	8.8342e-127	Down	Cluster_2	D2+ MSN	8str
Vsnl1	0.27173118	1.92878e-39	Up	Cluster_2	D2+ MSN	8str
Zmym4	0.286751066	2.45059e-62	Up	Cluster_2	D2+ MSN	8str
1700057H15Rik	-0.252858322	6.24563e-53	Down	Cluster_2	D2+ MSN	8str
2610037D02Rik	0.254040026	2.74959e-37	Up	Cluster_2	D2+ MSN	8str
Adgrl2	0.261064384	2.39274e-42	Up	Cluster_2	D2+ MSN	8str
Adora2a	-0.53830535	4.049e-175	Down	Cluster_2	D2+ MSN	8str
Ankrd12	0.255414098	1.35556e-46	Up	Cluster_2	D2+ MSN	8str
Arhgef11	0.258825319	1.60865e-38	Up	Cluster_2	D2+ MSN	8str
Arpp19	-0.32557415	5.40683e-58	Down	Cluster_2	D2+ MSN	8str
Bbx	0.260772893	2.4603e-41	Up	Cluster_2	D2+ MSN	8str
Btaf1	0.276041323	1.42216e-46	Up	Cluster_2	D2+ MSN	8str
Col25a1	0.251373117	5.56905e-26	Up	Cluster_2	D2+ MSN	8str
D030068K23Rik	0.306272098	4.03816e-47	Up	Cluster_2	D2+ MSN	8str
Drd2	-0.519551912	4.0388e-174	Down	Cluster_2	D2+ MSN	8str
Ep300	0.294364751	1.00071e-53	Up	Cluster_2	D2+ MSN	8str
Fig4	-0.256984736	5.17066e-24	Down	Cluster_2	D2+ MSN	8str
Galnt18	-0.431738254	1.67416e-81	Down	Cluster_2	D2+ MSN	8str
Gm10848	-0.376447425	6.58973e-64	Down	Cluster_2	D2+ MSN	8str
Gm13269	-0.329482421	1.76332e-49	Down	Cluster_2	D2+ MSN	8str
Gm26836	0.256932887	1.24295e-38	Up	Cluster_2	D2+ MSN	8str
Gnb5	-0.255393839	2.81588e-37	Down	Cluster_2	D2+ MSN	8str
Hpca	-0.269644493	9.99433e-45	Down	Cluster_2	D2+ MSN	8str
Htr2c	0.289904689	3.83129e-44	Up	Cluster_2	D2+ MSN	8str
Kpna4	0.254595703	4.31294e-43	Up	Cluster_2	D2+ MSN	8str
Nell1	-0.323654493	6.07493e-37	Down	Cluster_2	D2+ MSN	8str
Pdss2	0.256217111	1.40339e-35	Up	Cluster_2	D2+ MSN	8str
Pitpnm2	-0.275714116	9.05434e-35	Down	Cluster_2	D2+ MSN	8str
Ppp2r2a	-0.278230788	6.73732e-46	Down	Cluster_2	D2+ MSN	8str
R3hdm2	0.277078242	1.23276e-55	Up	Cluster_2	D2+ MSN	8str
Rasd2	-0.250744772	1.38661e-52	Down	Cluster_2	D2+ MSN	8str
RP23-231J2.1	0.409977041	8.13638e-38	Up	Cluster_2	D2+ MSN	8str
Rtn3	0.2530876	1.96785e-56	Up	Cluster_2	D2+ MSN	8str
Scn9a	0.300305371	2.54763e-53	Up	Cluster_2	D2+ MSN	8str
Slc25a13	0.261681593	1.50336e-45	Up	Cluster_2	D2+ MSN	8str
Slc44a5	0.273718732	3.03454e-35	Up	Cluster_2	D2+ MSN	8str
Snrnp48	0.275848586	3.42762e-48	Up	Cluster_2	D2+ MSN	8str
Srsf11	0.257096842	2.3117e-49	Up	Cluster_2	D2+ MSN	8str
Tsnax	0.262147615	7.48666e-42	Up	Cluster_2	D2+ MSN	8str
Wbscr17	-0.289584983	1.89619e-10	Down	Cluster_2	D2+ MSN	8str
RP24-127M20.8	0.482491708	2.79696E-23	Up	Subcluster_0v3	Ex0&1	12ctx
RP24-127M20.8	0.500263825	3.52469E-32	Up	Subcluster_1v4	Ex0&1	12ctx
RP24-127M20.8	0.45429512	2.32798E-12	Up	Subcluster_2Ex	Ex0&1	12ctx
Ccnl2	0.528420348	9.14722E-68	Up	Subcluster_0v3	Ex0&1	12ctx
Ccnl2	0.507967351	9.99139E-68	Up	Subcluster_1v4	Ex0&1	12ctx
Ccnl2	0.455578158	1.16689E-30	Up	Subcluster_2Ex	Ex0&1	12ctx
Ccnl2	0.460815803	0.000324595	Up	Subcluster_5	Ex0&1	12ctx
Malat1	-0.43986803	8.5728E-187	Down	Subcluster_0v3	Ex0&1	12ctx
Malat1	-0.57471564	2.3712E-229	Down	Subcluster_1v4	Ex0&1	12ctx
Malat1	-0.376308193	6.451E-66	Down	Subcluster_2Ex	Ex0&1	12ctx
Malat1	-0.456060493	1.85475E-13	Down	Subcluster_5	Ex0&1	12ctx
Ppp2r3a	0.471541952	1.32776E-40	Up	Subcluster_0v3	Ex0&1	12ctx
Ppp2r3a	0.604792555	1.25511E-66	Up	Subcluster_1v4	Ex0&1	12ctx
Ppp2r3a	0.380271651	1.31005E-17	Up	Subcluster_2Ex	Ex0&1	12ctx
Ppp2r3a	0.530795854	0.00237141	Up	Subcluster_5	Ex0&1	12ctx
Meg3	0.290213758	1.25264E-96	Up	Subcluster_0v3	Ex0&1	12ctx
Meg3	0.295574949	1.1202E-126	Up	Subcluster_1v4	Ex0&1	12ctx
Meg3	0.352850062	4.22445E-67	Up	Subcluster_2Ex	Ex0&1	12ctx
Zbtb16	-0.551580039	9.47243E-41	Down	Subcluster_0v3	Ex0&1	12ctx
Zbtb16	-0.519609592	1.82978E-39	Down	Subcluster_1v4	Ex0&1	12ctx
Zbtb16	-0.669203479	9.82301E-27	Down	Subcluster_2Ex	Ex0&1	12ctx
Atad2b	0.413891373	6.30032E-36	Up	Subcluster_0v3	Ex0&1	12ctx
Atad2b	0.423545771	3.37499E-47	Up	Subcluster_1v4	Ex0&1	12ctx
Atad2b	0.346111243	2.08624E-15	Up	Subcluster_2Ex	Ex0&1	12ctx
Gpatch8	0.278898133	2.38837E-29	Up	Subcluster_0v3	Ex0&1	12ctx
Gpatch8	0.277394095	1.38499E-32	Up	Subcluster_1v4	Ex0&1	12ctx
Gpatch8	0.338361517	2.82383E-24	Up	Subcluster_2Ex	Ex0&1	12ctx
Pafah1b1	0.373611492	1.06229E-34	Up	Subcluster_0v3	Ex0&1	12ctx
Pafah1b1	0.422256355	2.32911E-59	Up	Subcluster_1v4	Ex0&1	12ctx
Pafah1b1	0.398942491	8.92638E-26	Up	Subcluster_2Ex	Ex0&1	12ctx
Sema6d	0.397554232	2.26507E-19	Up	Subcluster_0v3	Ex0&1	12ctx
[truncated: 10,379 more rows]
