# Supplementary material for: Huntington disease oligodendrocyte maturation deficits revealed by single-nucleus RNAseq are rescued by thiamine-biotin supplementation
Source: Nat Commun. 2022 Dec 21;13:7791. doi: 10.1038/s41467-022-35388-x (PMC9772349; doi:10.1038/s41467-022-35388-x)
Supplement: Supplementary file 4 — Supplementary Dataset 2 [file 41467_2022_35388_MOESM4_ESM.xlsx]

## Sheet: allOPC_cluster2n3_R62vsNT
Column1	p_val	avg_log2FC	pct.1	pct.2	p_val_adj
Epn2	3.83505e-217	-1.19014	0.659	0.978	1.07374e-212
Nkain2	7.21428e-193	2.68134	0.756	0.39	2.01985e-188
Rbfox1	6.04637e-180	-1.17111	0.552	0.932	1.69286e-175
Xylt1	7.08527e-180	-0.955401	0.842	0.983	1.98373e-175
Cspg5	9.88277e-175	-1.14798	0.419	0.886	2.76698e-170
Megf11	1.41401e-174	-1.16662	0.412	0.893	3.95894e-170
Lhfpl3	3.1885e-174	-0.863811	0.931	0.99	8.92716e-170
Opcml	7.78908e-157	-0.729082	0.954	0.998	2.18079e-152
Gm38505	5.97523e-151	-1.13519	0.435	0.885	1.67294e-146
Gpc5	3.79649e-142	-0.884201	0.781	0.978	1.06294e-137
Chst11	7.00535e-141	-0.999608	0.496	0.894	1.96136e-136
Tnr	1.57329e-140	-0.765411	0.915	0.991	4.4049e-136
Ptprz1	4.40686e-140	-0.805737	0.81	0.981	1.23383e-135
Gm3764	6.82003e-139	-0.946339	0.604	0.92	1.90947e-134
Pdgfra	2.40379e-138	-0.979489	0.441	0.859	6.73014e-134
March1	1.57059e-134	-0.868931	0.653	0.963	4.39734e-130
Dscam	1.62929e-134	-0.68239	0.922	0.99	4.56168e-130
Lrrc4c	1.09111e-130	-0.612941	0.988	0.998	3.05489e-126
St18	1.176e-128	2.82398	0.435	0.056	3.29256e-124
AI854517	7.6147e-123	-0.887102	0.66	0.924	2.13196e-118
Grm5	2.88186e-118	-0.99346	0.55	0.867	8.06862e-114
Mmp16	1.65716e-115	-0.874309	0.641	0.911	4.63971e-111
Ttyh2	7.58163e-106	1.48703	0.379	0.047	2.1227e-101
Ntm	3.98191e-105	-0.61767	0.864	0.988	1.11485e-100
Nav3	2.46765e-104	-0.581611	0.932	0.991	6.90892e-100
Fam155a	8.3124e-104	-0.70794	0.747	0.975	2.32731e-99
Kcnip3	8.72575e-103	-0.895255	0.41	0.777	2.44304e-98
Nrxn3	4.40644e-101	-0.635049	0.88	0.99	1.23371e-96
Nrg3	2.03449e-99	-0.755952	0.677	0.948	5.69616e-95
Nxph1	1.38181e-96	-0.706385	0.817	0.977	3.8688e-92
Ntrk3	1.00648e-94	-0.770478	0.541	0.873	2.81795e-90
Arhgap23	1.07742e-92	1.43134	0.511	0.196	3.01656e-88
Enpp6	3.45835e-89	1.54201	0.282	0.01	9.68268e-85
Zeb1	1.8998e-85	-0.653002	0.824	0.955	5.31907e-81
Sorcs3	9.52867e-85	-0.77908	0.519	0.814	2.66784e-80
Zbtb20	1.84171e-84	0.580985	0.984	0.962	5.15643e-80
Cdh13	2.25206e-84	-0.738943	0.563	0.863	6.30532e-80
Slc35f1	1.0938e-82	-0.586073	0.851	0.971	3.06241e-78
Cacng4	6.62054e-82	-0.778304	0.608	0.861	1.85362e-77
Etv4	1.90745e-80	-0.874332	0.181	0.476	5.34049e-76
Kcnma1	5.81018e-80	-0.751356	0.548	0.82	1.62673e-75
Sgcz	8.55782e-79	-0.741008	0.685	0.904	2.39602e-74
Usp24	1.24542e-77	-0.713443	0.622	0.857	3.48693e-73
Gm27247	6.48663e-77	-0.856639	0.328	0.651	1.81613e-72
Dpp6	7.29424e-77	-0.662127	0.729	0.92	2.04224e-72
Ppfibp1	7.3595e-77	-0.818112	0.434	0.73	2.06051e-72
Nkain3	1.18187e-76	-0.901224	0.262	0.571	3.309e-72
Mbp	1.43359e-76	1.82869	0.419	0.141	4.01377e-72
Cspg4	3.91327e-76	-0.798456	0.343	0.651	1.09564e-71
Zcchc16	2.14549e-74	-0.879657	0.295	0.605	6.00694e-70
Car10	2.58219e-74	-1.02738	0.14	0.398	7.22962e-70
Rgs20	4.18012e-74	-0.888193	0.176	0.453	1.17035e-69
Fam19a2	6.85496e-72	-0.751992	0.528	0.809	1.91925e-67
Kcnk10	5.78877e-71	-0.807835	0.219	0.506	1.62074e-66
Kirrel3	9.16905e-70	-0.745818	0.414	0.724	2.56715e-65
Enpp2	1.00002e-69	1.00673	0.701	0.504	2.79985e-65
Grm7	4.92774e-69	-0.754595	0.424	0.714	1.37967e-64
Kcnip1	4.99628e-69	-0.834203	0.324	0.614	1.39886e-64
Pde7b	2.92755e-68	-0.74622	0.424	0.73	8.19656e-64
Cntn4	1.35137e-67	-0.563808	0.829	0.946	3.78357e-63
3110035E14Rik	8.17076e-67	-0.798608	0.222	0.498	2.28765e-62
Etv5	7.78132e-66	-0.783909	0.192	0.457	2.17862e-61
Ctnnd2	6.65463e-65	-0.430811	0.938	0.981	1.86316e-60
Ablim2	8.7211e-64	1.1396	0.291	0.058	2.44173e-59
Dab1	2.17162e-63	-0.722883	0.455	0.733	6.08009e-59
Fgf14	6.49009e-63	-0.513046	0.861	0.979	1.8171e-58
Shc3	9.38436e-63	-0.762431	0.172	0.422	2.62743e-58
Arhgap31	1.1687e-61	-0.60491	0.777	0.913	3.27213e-57
Cdo1	2.15743e-61	-0.779064	0.113	0.333	6.04038e-57
Pdzd2	2.91559e-61	-0.767879	0.313	0.588	8.16306e-57
Gabrg3	4.03574e-61	-0.860544	0.306	0.574	1.12993e-56
Gm20388	5.20271e-61	-0.485335	0.956	0.986	1.45666e-56
Nfasc	1.44851e-60	0.99389	0.658	0.465	4.05554e-56
Shc4	2.33863e-60	-0.759689	0.2	0.456	6.54769e-56
Ccser1	6.77033e-60	-0.573247	0.744	0.909	1.89556e-55
Vcan	9.53118e-60	-0.720475	0.595	0.822	2.66854e-55
Thsd7b	1.58794e-59	-0.768271	0.266	0.535	4.44591e-55
Pcdh15	3.05105e-59	-0.401745	0.969	0.993	8.54232e-55
Plp1	1.82178e-58	1.07973	0.505	0.28	5.10062e-54
Pde10a	2.42231e-58	-0.767214	0.427	0.666	6.782e-54
Fam234a	2.88506e-57	1.04321	0.459	0.228	8.07759e-53
Abhd2	3.07122e-57	-0.732039	0.443	0.692	8.59881e-53
Tcf7l2	5.61859e-57	0.913831	0.601	0.384	1.57309e-52
Flnb	1.57476e-56	1.01077	0.483	0.257	4.409e-52
Rgs7	4.25987e-56	-0.636218	0.524	0.774	1.19268e-51
Ppp2r3a	4.30983e-56	0.894126	0.608	0.385	1.20667e-51
Cdk19	1.03401e-55	1.07386	0.506	0.281	2.89503e-51
Kcnb2	1.26109e-55	-0.855841	0.226	0.475	3.53079e-51
Plpp4	1.59473e-55	-0.654772	0.371	0.644	4.46493e-51
Grip1	2.04253e-54	-0.726167	0.345	0.606	5.71869e-50
Kif21a	1.07609e-53	1.06023	0.318	0.098	3.01284e-49
Fgd4	3.47261e-53	0.984201	0.312	0.095	9.72262e-49
Arhgap5	1.74122e-52	1.00713	0.404	0.175	4.87508e-48
Alk	3.15232e-52	-0.704872	0.2	0.442	8.82586e-48
Son	6.52443e-52	0.615061	0.843	0.741	1.82671e-47
Ralgps1	1.00857e-51	0.897075	0.556	0.348	2.82381e-47
Samd4	1.09835e-51	-0.68644	0.289	0.545	3.07517e-47
Rbms3	2.05598e-51	-0.781247	0.161	0.384	5.75633e-47
Pknox2	6.91577e-51	-0.621179	0.303	0.567	1.93628e-46
Gpc6	1.87213e-50	-0.558098	0.645	0.863	5.2416e-46
Tenm2	4.036e-50	-0.785229	0.416	0.647	1.13e-45
Agap1	7.12568e-50	-0.517949	0.7	0.882	1.99505e-45
1700047M11Rik	1.30157e-48	0.940412	0.341	0.133	3.64414e-44
Col27a1	2.50978e-48	0.985098	0.311	0.108	7.02689e-44
Egfem1	2.64387e-48	-0.62806	0.356	0.619	7.40229e-44
Map7	3.78136e-48	0.947033	0.516	0.315	1.05871e-43
Vwc2	4.97621e-48	-0.686755	0.093	0.273	1.39324e-43
Grik2	1.13687e-47	0.532399	0.948	0.913	3.18301e-43
Srgap1	1.31481e-47	-0.583898	0.548	0.768	3.68122e-43
Mtss1l	2.79358e-47	-0.603885	0.414	0.662	7.82146e-43
Srcin1	6.69932e-47	1.01526	0.293	0.095	1.87568e-42
Gm2163	6.81846e-47	-0.67069	0.098	0.279	1.90903e-42
Sdk1	8.95325e-47	-0.645348	0.385	0.627	2.50673e-42
Kcnd2	1.03908e-46	-0.336869	0.962	0.99	2.90921e-42
Xkr4	2.19135e-46	-0.56808	0.672	0.872	6.13535e-42
Prkg2	7.50952e-46	-0.66234	0.185	0.401	2.10252e-41
Ldb2	1.3312e-45	-0.675503	0.19	0.409	3.72709e-41
Cacna1c	1.39428e-45	-0.540341	0.553	0.792	3.90372e-41
Olfm2	1.62902e-45	-0.699995	0.145	0.347	4.56094e-41
Rps6ka5	1.70532e-45	0.910809	0.307	0.107	4.77456e-41
Mdga2	2.77168e-45	-0.354875	0.964	0.987	7.76014e-41
Unc13c	3.81789e-45	-0.617158	0.493	0.735	1.06893e-40
Pak3	5.45452e-45	0.758642	0.699	0.544	1.52716e-40
Dusp15	1.8175e-44	0.991376	0.269	0.083	5.08862e-40
Tmem132d	2.16411e-44	-0.498113	0.642	0.865	6.05907e-40
Ntn1	4.69261e-44	-0.615888	0.329	0.562	1.31384e-39
Grik1	4.82452e-44	-0.684827	0.091	0.261	1.35077e-39
Kcnd3	5.25624e-44	-0.576295	0.422	0.667	1.47164e-39
Polg	5.63604e-44	-0.684995	0.202	0.414	1.57798e-39
Usp29	6.42629e-44	-0.709157	0.095	0.268	1.79923e-39
Plekhg1	1.30723e-43	1.00577	0.336	0.141	3.65998e-39
Shisa9	1.84551e-43	-0.662347	0.279	0.508	5.16706e-39
Anks1b	3.74586e-43	-0.287345	0.99	0.996	1.04877e-38
Rtn4	6.58873e-43	0.788181	0.583	0.391	1.84471e-38
Rev3l	1.70962e-42	-0.473159	0.715	0.887	4.7866e-38
Dcc	3.0541e-42	-0.389454	0.879	0.98	8.55088e-38
2610035D17Rik	3.80663e-42	0.548223	0.887	0.794	1.06578e-37
Rora	7.98171e-42	-0.367094	0.95	0.988	2.23472e-37
Fat3	1.11574e-41	-0.587878	0.438	0.658	3.12385e-37
Bcas1	1.46986e-41	0.672064	0.78	0.65	4.11531e-37
Csmd2	2.82276e-41	-0.430091	0.799	0.91	7.90318e-37
Cadps	2.98439e-41	-0.494245	0.593	0.8	8.35569e-37
Dpp10	3.74763e-41	-0.471489	0.713	0.881	1.04926e-36
Polr2a	5.49886e-41	0.867244	0.297	0.109	1.53957e-36
Spred2	5.91444e-41	-0.627378	0.179	0.382	1.65592e-36
Kalrn	8.59514e-41	-0.600124	0.354	0.577	2.40647e-36
Tenm1	9.10242e-41	-0.642938	0.427	0.634	2.5485e-36
Grik3	9.93549e-41	-0.6578	0.214	0.416	2.78174e-36
Grin3a	1.63196e-40	-0.525141	0.518	0.737	4.56917e-36
Fam19a1	2.58308e-40	-0.611674	0.46	0.684	7.23211e-36
Oxr1	2.62994e-40	-0.532823	0.445	0.685	7.36329e-36
Gm26835	4.17221e-40	-0.608395	0.256	0.473	1.16813e-35
Cobl	2.18464e-39	-0.565935	0.394	0.614	6.11656e-35
3632451O06Rik	2.644e-39	-0.603243	0.308	0.523	7.40267e-35
Mgat5b	3.38309e-39	-0.6359	0.201	0.398	9.47197e-35
Samd12	1.11553e-38	-0.609122	0.414	0.627	3.12326e-34
Pid1	1.1379e-38	-0.469814	0.742	0.917	3.1859e-34
Plcl1	1.25169e-38	0.828602	0.701	0.585	3.50449e-34
Ptprn2	1.47752e-38	-0.551513	0.439	0.661	4.13675e-34
Arhgef10	3.77921e-38	0.843736	0.356	0.17	1.0581e-33
Ankrd11	4.1344e-38	-0.531793	0.52	0.724	1.15755e-33
Gatm	4.23873e-38	0.863926	0.464	0.294	1.18676e-33
Prex1	6.2387e-38	-0.564518	0.394	0.61	1.74671e-33
Ptprr	6.42858e-38	-0.648658	0.158	0.339	1.79987e-33
Inpp4b	1.33935e-37	-0.599798	0.293	0.508	3.74991e-33
Epas1	1.56515e-37	-0.51725	0.118	0.289	4.38211e-33
Ntrk2	2.03484e-37	-0.490596	0.598	0.78	5.69714e-33
Clasp2	4.24693e-37	0.612575	0.744	0.631	1.18906e-32
Emid1	5.08475e-37	-0.512326	0.471	0.699	1.42363e-32
Epb41l2	3.0806e-36	0.74432	0.328	0.145	8.62506e-32
Zcchc24	4.43782e-36	-0.587202	0.397	0.592	1.2425e-31
Asic2	5.81663e-36	-0.50332	0.592	0.788	1.62854e-31
Edil3	7.20483e-36	0.606728	0.763	0.648	2.01721e-31
Zfp462	4.05933e-35	-0.499963	0.678	0.839	1.13653e-30
Astn2	1.67675e-34	-0.376921	0.819	0.93	4.69457e-30
Gpr158	1.98913e-34	-0.593907	0.361	0.566	5.56916e-30
St5	2.49462e-34	0.831607	0.375	0.203	6.98445e-30
Spon1	2.95126e-34	-0.467472	0.579	0.763	8.26293e-30
Map2	3.8368e-34	0.522609	0.838	0.783	1.07423e-29
Cntn6	5.0454e-34	0.643881	0.709	0.603	1.41261e-29
Stk32a	5.87763e-34	-0.53873	0.441	0.652	1.64562e-29
Rasgrf1	6.01793e-34	-0.571788	0.252	0.452	1.6849e-29
Tubb4a	1.41016e-33	0.872157	0.305	0.14	3.94817e-29
Fstl5	2.4596e-33	-0.56535	0.121	0.28	6.88637e-29
Gria3	4.06045e-33	-0.485404	0.532	0.724	1.13684e-28
Disc1	4.41225e-33	-0.494969	0.111	0.266	1.23534e-28
Gm44151	7.01737e-33	-0.500875	0.161	0.337	1.96472e-28
Chl1	8.19256e-33	-0.572854	0.343	0.548	2.29375e-28
Itga9	1.89262e-32	-0.616387	0.407	0.59	5.29895e-28
Cit	2.90096e-32	-0.505531	0.142	0.308	8.1221e-28
Plppr1	3.89822e-32	-0.515727	0.477	0.673	1.09142e-27
Sntg1	4.4129e-32	-0.318586	0.89	0.969	1.23552e-27
Gabbr2	4.61259e-32	-0.578763	0.175	0.346	1.29143e-27
C1ql1	5.62535e-32	-0.481179	0.128	0.288	1.57498e-27
Zdhhc14	6.68196e-32	0.535745	0.761	0.668	1.87081e-27
Ryr3	7.67766e-32	-0.538277	0.31	0.507	2.14959e-27
Cask	1.00987e-31	-0.441202	0.63	0.788	2.82743e-27
Dgkb	1.01622e-31	-0.487602	0.506	0.708	2.84522e-27
Nrg1	1.16084e-31	-0.608851	0.46	0.647	3.25013e-27
Nmnat2	1.6609e-31	-0.439242	0.581	0.772	4.65019e-27
Ednrb	1.72367e-31	-0.561042	0.125	0.279	4.82592e-27
Sgk1	3.68862e-31	-0.536845	0.247	0.434	1.03274e-26
Pitpnc1	6.10577e-31	-0.445983	0.423	0.653	1.70949e-26
Itpk1	6.84857e-31	0.734242	0.285	0.126	1.91746e-26
Tcf12	7.10633e-31	0.492615	0.82	0.736	1.98963e-26
Kcnk2	1.34965e-30	-0.560816	0.203	0.376	3.77874e-26
Fam222b	2.0766e-30	-0.564849	0.33	0.52	5.81406e-26
Clstn2	4.91651e-30	-0.542965	0.129	0.282	1.37653e-25
Erc2	5.44951e-30	-0.457757	0.487	0.682	1.52575e-25
Gm42948	6.46776e-30	-0.563197	0.224	0.396	1.81084e-25
Fam134b	6.64866e-30	0.709563	0.367	0.202	1.86149e-25
Sema5b	8.10338e-30	-0.507385	0.445	0.643	2.26878e-25
Phactr3	1.18926e-29	-0.427013	0.701	0.836	3.32969e-25
4930402H24Rik	1.48101e-29	0.607	0.767	0.674	4.14654e-25
Ptprg	3.01834e-29	-0.370064	0.799	0.914	8.45073e-25
Afap1l2	3.08888e-29	-0.473329	0.381	0.577	8.64826e-25
Nav2	4.99297e-29	-0.361736	0.839	0.942	1.39793e-24
Tmtc2	5.4207e-29	0.587376	0.767	0.681	1.51769e-24
Pdzrn4	1.68294e-28	-0.523972	0.317	0.504	4.71191e-24
Kank1	1.78998e-28	-0.439593	0.567	0.729	5.01159e-24
Unc79	2.29356e-28	-0.503519	0.367	0.552	6.42152e-24
Spred1	3.13187e-28	-0.492692	0.286	0.465	8.7686e-24
Cacna1e	3.52657e-28	-0.489629	0.249	0.423	9.87368e-24
Wls	4.70367e-28	0.756307	0.332	0.183	1.31693e-23
Itgav	4.93583e-28	-0.572034	0.309	0.482	1.38193e-23
Eps8	1.0593e-27	-0.416318	0.328	0.527	2.96583e-23
Atp1a2	2.02743e-27	-0.500329	0.338	0.521	5.6764e-23
Ryr2	3.58309e-27	-0.555147	0.148	0.293	1.00319e-22
Rab3c	3.83669e-27	-0.539447	0.188	0.347	1.0742e-22
Prkg1	4.19547e-27	-0.336465	0.805	0.922	1.17465e-22
Pde1c	4.22773e-27	0.66025	0.497	0.346	1.18368e-22
Fryl	5.55069e-27	0.580632	0.635	0.514	1.55408e-22
Sox5	6.27203e-27	-0.31253	0.849	0.94	1.75604e-22
Efcab14	6.62246e-27	0.674365	0.285	0.139	1.85416e-22
Ebf1	7.21951e-27	-0.613454	0.117	0.25	2.02132e-22
Bach2	1.01628e-26	-0.439133	0.509	0.693	2.84538e-22
Ncam1	1.08996e-26	0.343932	0.936	0.907	3.05166e-22
Macrod2	1.5489e-26	-0.358429	0.806	0.922	4.3366e-22
Rims1	1.93584e-26	-0.363556	0.736	0.863	5.41996e-22
Slc1a2	2.27953e-26	-0.475367	0.378	0.567	6.38222e-22
Ninj2	2.36648e-26	0.751559	0.38	0.225	6.62566e-22
Pkp4	2.75501e-26	0.687314	0.436	0.29	7.71349e-22
Celf2	3.06372e-26	-0.362543	0.819	0.917	8.5778e-22
Kcnab1	5.34574e-26	-0.563411	0.188	0.343	1.4967e-21
Ccser2	7.59764e-26	0.620704	0.495	0.349	2.12719e-21
Chst9	8.01244e-26	-0.478681	0.168	0.325	2.24332e-21
Cyth1	9.67349e-26	0.666091	0.254	0.117	2.70838e-21
Kif1b	1.49681e-25	0.523323	0.736	0.646	4.19077e-21
0610040J01Rik	1.59543e-25	-0.49436	0.22	0.386	4.46689e-21
Ogt	1.7076e-25	0.537167	0.605	0.491	4.78093e-21
Gpatch8	1.82199e-25	0.50951	0.668	0.566	5.10121e-21
Lrrtm4	1.94516e-25	-0.278779	0.949	0.983	5.44607e-21
Rap1gap2	3.09802e-25	-0.450965	0.159	0.308	8.67384e-21
Snx25	3.57442e-25	-0.494055	0.394	0.575	1.00077e-20
Zfp36l1	4.06474e-25	-0.509214	0.291	0.462	1.13805e-20
Dock4	4.73574e-25	0.425272	0.864	0.797	1.32591e-20
Ctnna3	6.10631e-25	-0.300321	0.765	0.921	1.70964e-20
Nrg3os	6.73435e-25	-0.531825	0.209	0.367	1.88548e-20
Adgrb3	8.97341e-25	-0.27528	0.934	0.97	2.51238e-20
Adcy8	1.1957e-24	-0.460899	0.122	0.255	3.34771e-20
Npas3	1.2469e-24	-0.251916	0.952	0.985	3.49106e-20
Itpr2	1.50521e-24	-0.389617	0.59	0.756	4.21428e-20
Tshz2	1.68281e-24	-0.398077	0.41	0.609	4.71154e-20
Lrfn2	1.74572e-24	-0.453622	0.179	0.33	4.88767e-20
Sgms1	1.75375e-24	-0.480028	0.312	0.48	4.91016e-20
4930445B16Rik	1.92049e-24	-0.479491	0.256	0.424	5.377e-20
Sycp2	3.14615e-24	-0.488827	0.26	0.423	8.80859e-20
Lrrtm3	3.49765e-24	-0.357561	0.662	0.82	9.79271e-20
Mapk10	3.69704e-24	-0.3991	0.544	0.711	1.0351e-19
Dixdc1	4.11456e-24	0.649643	0.254	0.12	1.15199e-19
Phactr1	4.25959e-24	0.503198	0.767	0.71	1.1926e-19
Ror1	4.90384e-24	-0.462679	0.127	0.26	1.37298e-19
Mboat2	5.03671e-24	0.574752	0.521	0.38	1.41018e-19
Lrrfip1	8.95561e-24	-0.478277	0.301	0.465	2.50739e-19
Elmo1	9.19345e-24	0.482129	0.676	0.558	2.57398e-19
Aatk	9.84406e-24	0.660887	0.366	0.228	2.75614e-19
Rgcc	1.24494e-23	-0.473666	0.371	0.537	3.48559e-19
Dip2b	1.32062e-23	0.639428	0.45	0.317	3.69747e-19
Mgll	1.37929e-23	0.557351	0.536	0.4	3.86173e-19
Fmnl2	1.39731e-23	0.466739	0.784	0.71	3.91219e-19
Prkcq	1.63671e-23	0.515571	0.628	0.531	4.58246e-19
Naaladl2	2.22835e-23	0.562852	0.701	0.602	6.23893e-19
Slc44a1	3.59174e-23	0.580784	0.464	0.328	1.00562e-18
Zfand6	3.80554e-23	0.579818	0.394	0.255	1.06548e-18
Ptprs	5.46801e-23	-0.423894	0.394	0.569	1.53093e-18
Hip1r	5.55099e-23	-0.426638	0.291	0.461	1.55416e-18
Scfd2	8.8551e-23	-0.424538	0.383	0.553	2.47925e-18
Myt1	9.53152e-23	-0.447988	0.496	0.662	2.66863e-18
Map4k5	1.74253e-22	0.608436	0.401	0.27	4.87875e-18
Gjc3	2.23917e-22	-0.420341	0.421	0.591	6.26924e-18
Reep1	2.77337e-22	-0.459972	0.294	0.457	7.76487e-18
Pard3b	3.01533e-22	0.744776	0.358	0.222	8.44233e-18
Gm10863	3.41173e-22	0.666675	0.354	0.216	9.55216e-18
Nova1	3.46613e-22	-0.448922	0.423	0.581	9.70446e-18
Ccnl2	4.08917e-22	0.542289	0.484	0.358	1.14489e-17
Gm4876	4.4699e-22	-0.39132	0.665	0.803	1.25148e-17
Gm16083	4.56562e-22	-0.430898	0.126	0.253	1.27828e-17
Pstpip2	7.0497e-22	-0.496019	0.212	0.356	1.97378e-17
Trpm3	8.21605e-22	-0.509848	0.289	0.444	2.30033e-17
Tpk1	8.21997e-22	0.753983	0.278	0.153	2.30143e-17
Rbm39	9.4449e-22	0.394002	0.797	0.731	2.64438e-17
Myo16	1.01591e-21	-0.409691	0.32	0.488	2.84434e-17
Pafah1b1	1.17625e-21	0.428621	0.708	0.629	3.29328e-17
Cald1	2.07364e-21	0.538316	0.604	0.513	5.80576e-17
Igsf11	2.29423e-21	0.642604	0.267	0.138	6.4234e-17
Hivep2	2.37004e-21	-0.41097	0.415	0.584	6.63565e-17
Fgf12	2.48083e-21	-0.393716	0.515	0.685	6.94582e-17
Rgs7bp	2.67713e-21	-0.44931	0.334	0.493	7.49544e-17
Dlg1	3.49297e-21	0.54402	0.571	0.462	9.77961e-17
Gm20642	4.43048e-21	-0.452535	0.183	0.322	1.24045e-16
Nfix	5.48382e-21	0.562778	0.429	0.3	1.53536e-16
Ank2	7.52463e-21	0.380568	0.912	0.888	2.10675e-16
App	8.37772e-21	0.477394	0.637	0.529	2.34559e-16
Gabrb2	1.4521e-20	-0.432144	0.212	0.354	4.06559e-16
Fam189a1	1.60806e-20	-0.395466	0.321	0.483	4.50224e-16
Cacna1d	1.68761e-20	-0.372531	0.408	0.568	4.72498e-16
Jam3	2.51664e-20	0.542235	0.461	0.346	7.04609e-16
Lrch3	3.10133e-20	0.51731	0.565	0.46	8.6831e-16
Dclk1	3.78975e-20	-0.398273	0.386	0.55	1.06106e-15
Rimbp2	4.27315e-20	-0.38613	0.203	0.348	1.1964e-15
Evi5l	4.54956e-20	-0.395711	0.507	0.663	1.27379e-15
Pcsk2	4.56654e-20	-0.429683	0.284	0.433	1.27854e-15
Osbpl9	5.26542e-20	0.535133	0.348	0.215	1.47421e-15
Hipk2	5.46461e-20	0.431464	0.668	0.583	1.52998e-15
Fhit	5.55888e-20	-0.374799	0.516	0.687	1.55637e-15
Etv1	6.13393e-20	-0.450833	0.199	0.334	1.71738e-15
Slc15a2	9.80685e-20	0.608441	0.269	0.149	2.74572e-15
Prkcb	1.30612e-19	-0.325992	0.733	0.857	3.65687e-15
Arid4b	1.34205e-19	0.524522	0.533	0.419	3.75746e-15
Rgma	1.50825e-19	0.585496	0.317	0.193	4.22278e-15
Gm13052	1.88199e-19	-0.403307	0.239	0.384	5.26921e-15
Mbnl2	1.91116e-19	0.427943	0.688	0.6	5.35086e-15
Fhod3	2.1263e-19	-0.428916	0.147	0.269	5.95321e-15
Plcb1	3.91796e-19	-0.252593	0.857	0.934	1.09695e-14
Mpzl1	4.75727e-19	0.522286	0.502	0.384	1.33194e-14
Sh3rf3	5.23521e-19	-0.43308	0.186	0.319	1.46575e-14
Serpine2	6.5891e-19	-0.364654	0.518	0.665	1.84482e-14
Reps2	9.41625e-19	0.623115	0.36	0.242	2.63636e-14
Tra2a	9.86837e-19	0.40376	0.693	0.604	2.76295e-14
Mpp6	1.22178e-18	-0.398534	0.187	0.319	3.42074e-14
Fa2h	1.2709e-18	0.553662	0.396	0.274	3.55827e-14
Dok6	1.33917e-18	-0.352594	0.525	0.678	3.7494e-14
Shisa6	1.56625e-18	-0.425771	0.192	0.319	4.38518e-14
Tmem117	1.70215e-18	0.765328	0.283	0.167	4.76569e-14
Ankfn1	2.26683e-18	-0.427314	0.134	0.25	6.34668e-14
Tnpo1	2.47223e-18	-0.401188	0.407	0.552	6.92174e-14
Mapre2	2.47378e-18	0.540315	0.428	0.306	6.92609e-14
Olig2	2.52482e-18	-0.37437	0.136	0.252	7.06898e-14
Dpysl3	2.54757e-18	-0.425109	0.246	0.379	7.13269e-14
Trim9	3.16788e-18	-0.382213	0.198	0.328	8.86942e-14
Rnf150	3.36117e-18	-0.414187	0.163	0.284	9.41059e-14
Klhl2	3.73229e-18	0.607034	0.374	0.257	1.04497e-13
Gm16168	4.27116e-18	0.583898	0.419	0.296	1.19584e-13
Adam12	5.20782e-18	-0.418132	0.467	0.624	1.45809e-13
Msi2	6.68984e-18	0.367512	0.734	0.663	1.87302e-13
Gnal	8.77659e-18	-0.423805	0.144	0.258	2.45727e-13
Rere	1.24597e-17	0.298711	0.89	0.872	3.48847e-13
Dock9	1.26318e-17	-0.346732	0.593	0.733	3.53664e-13
Sema6a	1.26637e-17	-0.376307	0.409	0.565	3.54559e-13
Foxp1	1.28997e-17	0.546437	0.401	0.285	3.61166e-13
Gabrb3	1.30804e-17	-0.385176	0.379	0.528	3.66224e-13
C530008M17Rik	1.56039e-17	-0.351204	0.386	0.544	4.36877e-13
Gabrb1	1.63626e-17	-0.40297	0.323	0.468	4.58121e-13
Baz2b	2.11514e-17	0.445635	0.665	0.6	5.92196e-13
Rsrc1	2.12734e-17	0.485215	0.461	0.346	5.95612e-13
Srgap3	2.31786e-17	0.40053	0.659	0.573	6.48954e-13
Tmeff2	2.57252e-17	0.443107	0.781	0.728	7.20254e-13
Osbpl10	2.99201e-17	-0.388566	0.164	0.284	8.37702e-13
Myo6	3.13324e-17	0.622351	0.299	0.187	8.77244e-13
Kcnh7	3.4011e-17	-0.502007	0.164	0.281	9.5224e-13
Tmcc1	3.98766e-17	0.430086	0.651	0.573	1.11646e-12
Mitf	6.06266e-17	0.537575	0.41	0.29	1.69742e-12
Dnm1	7.47625e-17	-0.36559	0.171	0.292	2.0932e-12
Kcnn2	7.66346e-17	-0.371131	0.225	0.356	2.14562e-12
Gsap	8.13781e-17	-0.382208	0.344	0.484	2.27842e-12
Prkca	8.42446e-17	0.30641	0.879	0.831	2.35868e-12
Rtn1	1.04347e-16	0.411799	0.645	0.546	2.92149e-12
Cdc14a	1.28679e-16	-0.346066	0.161	0.278	3.60276e-12
Gm26883	1.50907e-16	-0.34296	0.335	0.488	4.22508e-12
Gpr137c	1.53757e-16	-0.35828	0.241	0.376	4.30489e-12
Kctd8	1.55752e-16	-0.449828	0.169	0.286	4.36075e-12
Pacrg	1.76075e-16	0.550808	0.513	0.407	4.92975e-12
Nrcam	1.90925e-16	-0.375238	0.566	0.701	5.34552e-12
Luc7l2	2.0479e-16	0.431646	0.689	0.632	5.73371e-12
Limch1	2.10691e-16	0.478015	0.502	0.388	5.89892e-12
Dpf3	3.01309e-16	-0.399478	0.192	0.313	8.43606e-12
Stxbp6	3.3756e-16	-0.334467	0.186	0.311	9.451e-12
Erdr1	3.62208e-16	-0.385744	0.145	0.255	1.01411e-11
Fip1l1	3.93203e-16	-0.373919	0.308	0.442	1.10089e-11
Ptprk	4.42938e-16	-0.327223	0.577	0.712	1.24014e-11
Tbc1d5	4.46913e-16	0.439934	0.607	0.513	1.25127e-11
Ppfia2	4.51214e-16	-0.306798	0.629	0.763	1.26331e-11
Zfp536	4.57044e-16	0.511487	0.546	0.461	1.27963e-11
Khdrbs3	5.48759e-16	-0.401071	0.216	0.342	1.53641e-11
Scn1a	6.67382e-16	-0.371357	0.25	0.384	1.86854e-11
Mertk	6.80696e-16	-0.405059	0.163	0.277	1.90581e-11
Brinp1	8.07824e-16	-0.308433	0.695	0.832	2.26174e-11
Ddx5	8.7338e-16	0.423743	0.585	0.491	2.44529e-11
Bcas1os2	9.50908e-16	0.443072	0.378	0.261	2.66235e-11
B3galt1	1.03657e-15	-0.334146	0.486	0.632	2.90218e-11
Tpm1	1.32464e-15	-0.360602	0.294	0.431	3.70872e-11
Gria4	1.76411e-15	-0.29536	0.71	0.804	4.93914e-11
Calcrl	1.78557e-15	-0.352693	0.294	0.433	4.99924e-11
Txndc16	2.01e-15	0.509112	0.417	0.311	5.62761e-11
Prickle2	2.01823e-15	0.379153	0.74	0.681	5.65064e-11
Hivep3	2.03245e-15	0.468512	0.3	0.19	5.69044e-11
Neo1	3.61175e-15	0.40065	0.57	0.465	1.01122e-10
Far1	4.36566e-15	0.470717	0.332	0.228	1.2223e-10
Acot7	7.14029e-15	0.446608	0.253	0.15	1.99914e-10
Ptpn9	7.17552e-15	-0.363015	0.216	0.337	2.009e-10
Rubcn	7.42888e-15	0.486957	0.261	0.16	2.07994e-10
Rftn2	7.44408e-15	0.502957	0.384	0.28	2.08419e-10
Rin2	1.01382e-14	-0.357093	0.43	0.557	2.8385e-10
Kcnh8	1.03271e-14	-0.33639	0.471	0.612	2.89138e-10
Dfna5	1.04339e-14	-0.33029	0.222	0.342	2.92128e-10
Kcnip4	1.08276e-14	-0.453384	0.35	0.477	3.0315e-10
Snap25	1.12688e-14	-0.42127	0.352	0.48	3.15503e-10
Lrfn5	1.1566e-14	-0.323917	0.478	0.616	3.23825e-10
Syt16	1.20184e-14	-0.349407	0.282	0.415	3.3649e-10
Slc6a1	1.45143e-14	0.395612	0.534	0.436	4.06372e-10
Macf1	1.55552e-14	0.333634	0.855	0.836	4.35515e-10
Prune2	1.6115e-14	0.487105	0.334	0.227	4.51189e-10
Cdc42se2	1.67138e-14	0.459787	0.485	0.388	4.67953e-10
Tjp2	1.72233e-14	0.417627	0.284	0.176	4.82219e-10
Hspa8	2.2182e-14	0.430399	0.252	0.15	6.21051e-10
Atp2b2	2.56226e-14	-0.357362	0.255	0.384	7.1738e-10
Trio	3.08683e-14	-0.312491	0.639	0.748	8.6425e-10
6030407O03Rik	3.28053e-14	0.461459	0.383	0.279	9.18483e-10
A930015D03Rik	3.41977e-14	0.443061	0.274	0.171	9.57467e-10
Ppp1r9a	3.42654e-14	-0.30764	0.558	0.695	9.59364e-10
Setd7	3.7859e-14	0.454472	0.454	0.352	1.05998e-09
Itgb8	5.0639e-14	-0.361807	0.181	0.288	1.41779e-09
Kat2b	5.71289e-14	0.516177	0.346	0.246	1.5995e-09
Gria1	5.72571e-14	-0.375327	0.179	0.287	1.60308e-09
Sik3	5.8393e-14	0.34966	0.768	0.739	1.63489e-09
Mical3	6.01605e-14	0.477691	0.485	0.405	1.68437e-09
Taf15	6.64957e-14	0.411319	0.443	0.342	1.86175e-09
Camk2d	7.42882e-14	0.438803	0.522	0.426	2.07992e-09
Ppp1r16b	8.25298e-14	0.507817	0.467	0.372	2.31067e-09
Nsd1	8.33206e-14	0.346696	0.66	0.594	2.33281e-09
Atp8a1	9.02517e-14	0.456784	0.583	0.527	2.52687e-09
Smoc1	1.08948e-13	0.435343	0.493	0.398	3.05032e-09
Tmem191c	1.21659e-13	-0.344928	0.161	0.265	3.40621e-09
Cdh19	1.41472e-13	0.513451	0.322	0.223	3.96094e-09
Mast2	1.52974e-13	-0.329332	0.323	0.451	4.28295e-09
Thsd7a	1.60575e-13	-0.313126	0.544	0.667	4.49577e-09
Ckb	1.74447e-13	-0.330552	0.298	0.418	4.88416e-09
Zcchc7	2.20851e-13	0.344473	0.615	0.546	6.18339e-09
Magi1	2.48159e-13	-0.289106	0.578	0.712	6.94796e-09
Susd4	2.72803e-13	-0.348424	0.289	0.404	7.63792e-09
Grk5	2.7848e-13	-0.309766	0.292	0.414	7.79688e-09
Trim35	3.20038e-13	0.430078	0.374	0.274	8.96043e-09
Cmtm4	3.22384e-13	-0.321124	0.161	0.264	9.02611e-09
Gfra1	3.93252e-13	-0.311219	0.442	0.572	1.10103e-08
Sox5os4	5.02605e-13	-0.326241	0.207	0.317	1.40719e-08
Sulf1	5.41388e-13	-0.342351	0.225	0.334	1.51578e-08
Dpyd	6.16532e-13	0.262632	0.906	0.886	1.72617e-08
Aig1	6.8059e-13	0.455495	0.459	0.374	1.90552e-08
Camk1	7.16362e-13	-0.316876	0.174	0.276	2.00567e-08
Plxnb3	9.68478e-13	0.431305	0.265	0.169	2.71154e-08
Agpat4	9.69671e-13	0.417562	0.255	0.16	2.71488e-08
Cdh20	1.01449e-12	0.348799	0.789	0.739	2.84036e-08
Igsf21	1.26153e-12	-0.295425	0.235	0.351	3.53203e-08
Ak5	1.35964e-12	-0.365991	0.196	0.302	3.80673e-08
Zeb2	1.63588e-12	0.309835	0.856	0.82	4.58013e-08
Camta1	1.73616e-12	-0.311799	0.436	0.557	4.86091e-08
Kcnj3	1.77307e-12	0.518854	0.37	0.277	4.96424e-08
Fmn2	1.86999e-12	-0.303935	0.475	0.594	5.2356e-08
Cipc	1.93729e-12	0.441647	0.345	0.249	5.42404e-08
U2surp	2.53292e-12	0.409134	0.33	0.234	7.09166e-08
Tmem63b	2.8382e-12	-0.279161	0.168	0.267	7.9464e-08
Tulp4	2.91866e-12	0.412806	0.46	0.374	8.17168e-08
Atad2b	3.13898e-12	0.380547	0.522	0.443	8.78852e-08
Nol4	3.3103e-12	-0.289342	0.518	0.649	9.26817e-08
Svil	3.46248e-12	-0.376169	0.43	0.539	9.69426e-08
Acyp2	3.47517e-12	0.468886	0.435	0.351	9.72979e-08
Kmt2e	3.97552e-12	0.396275	0.497	0.409	1.11307e-07
Dennd1a	4.76052e-12	0.275744	0.789	0.76	1.33285e-07
Lrrc8d	5.50913e-12	0.43428	0.474	0.394	1.54245e-07
Nnat	5.95069e-12	-0.265162	0.387	0.524	1.66607e-07
Strn3	6.2763e-12	0.344999	0.605	0.539	1.75724e-07
Cmss1	7.55455e-12	0.337622	0.757	0.723	2.11512e-07
Snrnp70	8.05974e-12	0.28197	0.747	0.689	2.25657e-07
Thtpa	8.83732e-12	0.41825	0.291	0.201	2.47427e-07
Ddx17	9.44893e-12	0.341381	0.518	0.431	2.64551e-07
Pag1	9.61035e-12	0.410573	0.4	0.308	2.69071e-07
Slc8a3	1.00728e-11	-0.276415	0.221	0.331	2.82019e-07
Galnt3	1.0754e-11	-0.312533	0.287	0.399	3.01091e-07
Sorbs1	1.10032e-11	-0.317264	0.227	0.334	3.08066e-07
Matn4	1.13611e-11	-0.311887	0.377	0.489	3.18088e-07
Itm2b	1.18781e-11	0.415898	0.313	0.226	3.32563e-07
Thra	1.30724e-11	0.4097	0.371	0.284	3.66e-07
Fndc3b	1.30811e-11	-0.319938	0.181	0.279	3.66244e-07
Ncor2	1.63973e-11	0.384988	0.294	0.203	4.59092e-07
Tspan7	1.92574e-11	-0.250103	0.383	0.506	5.3917e-07
2900011O08Rik	1.98993e-11	-0.29941	0.211	0.317	5.57141e-07
Slc1a3	2.25851e-11	0.387628	0.583	0.505	6.32338e-07
4932443L11Rik	2.34672e-11	-0.296836	0.491	0.609	6.57035e-07
Gucy1a2	2.46607e-11	-0.30089	0.339	0.459	6.90451e-07
Lmtk2	2.47247e-11	-0.307748	0.334	0.453	6.92241e-07
Ptn	2.60388e-11	-0.296258	0.562	0.666	7.29035e-07
Cacna2d3	2.71872e-11	0.368295	0.687	0.653	7.61188e-07
Map3k1	2.72752e-11	-0.330395	0.239	0.339	7.63651e-07
Mb21d2	3.13404e-11	-0.283596	0.41	0.531	8.77469e-07
Zdhhc2	3.14837e-11	-0.283175	0.361	0.491	8.8148e-07
Ugdh	3.26381e-11	-0.269807	0.314	0.439	9.13803e-07
Mvb12b	3.54114e-11	0.377689	0.382	0.289	9.91447e-07
Gm26804	4.04288e-11	0.299701	0.75	0.691	1.13192e-06
Metap1d	4.09984e-11	0.41658	0.29	0.203	1.14787e-06
Kcnh5	4.37256e-11	-0.277596	0.274	0.384	1.22423e-06
Adgrl1	4.5387e-11	-0.271903	0.266	0.379	1.27075e-06
Pcdh11x	5.05264e-11	-0.276998	0.741	0.816	1.41464e-06
Rfx4	6.05567e-11	-0.273401	0.198	0.299	1.69547e-06
Creb5	6.47092e-11	-0.259964	0.345	0.462	1.81173e-06
Cfap20	6.86756e-11	-0.31925	0.279	0.387	1.92278e-06
Arhgap26	7.08305e-11	-0.30622	0.383	0.496	1.98311e-06
Slc22a23	7.109e-11	0.377265	0.657	0.612	1.99038e-06
Neto1	8.69261e-11	-0.272754	0.401	0.525	2.43376e-06
Lrp4	1.06838e-10	-0.276985	0.202	0.299	2.99126e-06
Mpped2	1.1972e-10	0.375197	0.686	0.65	3.35192e-06
Sulf2	1.20607e-10	-0.282153	0.515	0.62	3.37677e-06
Xkr6	1.34225e-10	-0.304249	0.348	0.462	3.75802e-06
Hip1	1.35846e-10	-0.257334	0.668	0.779	3.80342e-06
Tfdp2	1.41721e-10	0.38971	0.257	0.172	3.9679e-06
Atrnl1	1.46323e-10	-0.254514	0.228	0.334	4.09674e-06
Gm11149	1.48435e-10	0.354446	0.541	0.462	4.1559e-06
Syn2	1.58845e-10	-0.285488	0.543	0.658	4.44735e-06
Chn2	1.69099e-10	0.445208	0.302	0.218	4.73444e-06
Gfod1	1.69365e-10	-0.315804	0.242	0.342	4.74189e-06
Zdhhc20	1.91422e-10	0.397088	0.421	0.337	5.35944e-06
Car8	1.91624e-10	-0.292553	0.262	0.366	5.36508e-06
Nedd4l	2.01383e-10	0.417549	0.305	0.214	5.63833e-06
Stau2	2.47607e-10	-0.292068	0.328	0.434	6.9325e-06
Cdk12	2.76174e-10	0.377107	0.452	0.383	7.73232e-06
Rnf157	3.15847e-10	-0.254567	0.288	0.396	8.8431e-06
Tgfa	3.78453e-10	-0.297914	0.295	0.403	1.05959e-05
Gpr45	4.05901e-10	-0.282247	0.182	0.271	1.13644e-05
Sema3d	4.528e-10	-0.255531	0.447	0.559	1.26775e-05
Ctdspl	4.55117e-10	0.362422	0.387	0.303	1.27424e-05
Hnrnph3	5.13925e-10	0.309396	0.381	0.293	1.43889e-05
Ino80d	5.25977e-10	0.374302	0.342	0.264	1.47263e-05
Spats2	5.35461e-10	-0.267612	0.227	0.325	1.49918e-05
Rapgef1	6.90126e-10	0.353471	0.526	0.462	1.93222e-05
Smarca2	7.30083e-10	0.323146	0.502	0.423	2.04409e-05
Elf1	7.57607e-10	0.391673	0.349	0.266	2.12115e-05
Pcmtd2	7.6245e-10	-0.281906	0.315	0.418	2.13471e-05
Akt3	1.04296e-09	0.257293	0.756	0.713	2.92009e-05
Fam102a	1.05714e-09	0.354453	0.287	0.207	2.95977e-05
Gm38399	1.08927e-09	0.450651	0.426	0.352	3.04974e-05
Alcam	1.12215e-09	-0.252675	0.63	0.737	3.14179e-05
Peli2	1.12784e-09	-0.255821	0.279	0.384	3.15773e-05
Rorb	1.15009e-09	-0.273329	0.212	0.307	3.22001e-05
Cacnb2	1.1557e-09	-0.293319	0.227	0.322	3.23572e-05
Ccdc88a	1.1592e-09	0.255342	0.802	0.762	3.24554e-05
Soga1	1.2815e-09	0.353362	0.402	0.319	3.58795e-05
Gab1	1.35313e-09	0.347926	0.574	0.508	3.78849e-05
Fam110b	1.37819e-09	-0.282509	0.269	0.37	3.85866e-05
Jam2	1.40238e-09	-0.259119	0.197	0.289	3.92639e-05
Sirt2	1.48851e-09	0.410116	0.405	0.335	4.16752e-05
Stx16	1.5629e-09	0.322128	0.429	0.349	4.3758e-05
Wbscr17	1.70339e-09	-0.277413	0.225	0.322	4.76914e-05
Nim1k	1.77691e-09	-0.259909	0.166	0.25	4.97499e-05
5031439G07Rik	1.77791e-09	0.417199	0.366	0.29	4.97779e-05
Myo9a	1.80995e-09	0.355827	0.475	0.403	5.0675e-05
Rasa2	1.86534e-09	-0.260991	0.323	0.427	5.22259e-05
Ubn2	1.91557e-09	0.305035	0.674	0.627	5.36321e-05
Cd9	2.15566e-09	0.378204	0.408	0.33	6.03542e-05
Ubb	2.15624e-09	0.323424	0.338	0.255	6.03705e-05
Jarid2	2.33809e-09	0.346699	0.493	0.423	6.5462e-05
Antxr1	2.55693e-09	-0.265205	0.241	0.335	7.15889e-05
Gigyf2	3.75134e-09	0.330452	0.435	0.359	0.00010503
Stag2	4.81511e-09	0.366764	0.295	0.219	0.000134813
Satb1	5.03365e-09	0.384876	0.315	0.237	0.000140932
Tanc1	5.11308e-09	-0.257835	0.47	0.573	0.000143156
Atl1	5.39149e-09	0.375295	0.266	0.189	0.000150951
Srrm3	5.52234e-09	-0.272474	0.174	0.257	0.000154614
Rab11fip2	5.54648e-09	0.312114	0.469	0.388	0.00015529
Chd2	6.39099e-09	0.372944	0.454	0.389	0.000178935
Dctn4	7.11147e-09	0.379996	0.295	0.22	0.000199107
Otud7b	7.81119e-09	0.404855	0.404	0.339	0.000218698
Abhd17b	7.98948e-09	0.269239	0.573	0.497	0.000223689
Rsrc2	8.28233e-09	0.326594	0.386	0.312	0.000231889
Scg5	9.70243e-09	0.326692	0.427	0.359	0.000271649
Lamp2	9.73604e-09	0.36798	0.311	0.24	0.00027259
Ube4b	1.08453e-08	0.316566	0.327	0.25	0.000303646
Arhgef40	1.09309e-08	-0.25501	0.181	0.265	0.000306044
Eya1	1.11138e-08	-0.258988	0.375	0.481	0.000311163
Immp1l	1.11738e-08	0.337734	0.403	0.33	0.000312845
Sema5a	1.13058e-08	0.310325	0.563	0.5	0.000316539
Ick	1.19375e-08	0.373233	0.3	0.226	0.000334227
Mxi1	1.22348e-08	0.389462	0.356	0.284	0.000342549
Abca1	1.23461e-08	0.350063	0.4	0.326	0.000345665
Serinc5	1.34445e-08	-0.270709	0.256	0.348	0.000376419
Suv420h1	1.44707e-08	0.326066	0.39	0.32	0.00040515
Kazn	1.54423e-08	-0.284795	0.215	0.299	0.000432354
Rufy3	1.61092e-08	0.299499	0.466	0.392	0.000451027
Gm21092	1.65823e-08	0.263968	0.616	0.57	0.000464272
Cobll1	1.68771e-08	0.370403	0.546	0.496	0.000472524
Arhgef1	1.74772e-08	0.345375	0.283	0.207	0.000489328
Ncor1	2.21861e-08	0.270593	0.627	0.572	0.000621165
Apbb2	2.67168e-08	0.324899	0.593	0.543	0.000748017
Rab30	2.74002e-08	0.39487	0.358	0.288	0.000767151
Dnm3	2.75729e-08	0.252366	0.852	0.847	0.000771986
Astn1	2.87938e-08	0.296081	0.636	0.584	0.000806168
Tnrc6b	3.21371e-08	0.279976	0.713	0.689	0.000899773
Usp34	3.28269e-08	0.274515	0.646	0.605	0.000919089
Fyn	3.29082e-08	0.274807	0.684	0.632	0.000921363
Prtg	3.38643e-08	0.398316	0.28	0.207	0.000948132
Atp9a	3.56274e-08	0.328423	0.408	0.336	0.000997497
Tom1l2	4.1867e-08	0.33961	0.464	0.395	0.00117219
Srebf2	4.46325e-08	0.36353	0.251	0.183	0.00124962
Eri3	5.54408e-08	0.29945	0.416	0.346	0.00155223
Tspan5	5.66365e-08	0.347976	0.361	0.29	0.00158571
Csgalnact1	5.75205e-08	0.300782	0.515	0.453	0.00161046
Dpysl2	6.16133e-08	0.322922	0.404	0.332	0.00172505
Kcnq1ot1	7.22312e-08	0.260082	0.647	0.603	0.00202233
Pcm1	7.23059e-08	0.285201	0.519	0.461	0.00202442
Sobp	8.04802e-08	0.300288	0.608	0.572	0.00225328
Akap6	8.94775e-08	0.290406	0.706	0.667	0.00250519
Sumo1	9.52355e-08	0.328883	0.283	0.211	0.0026664
Gm26699	9.8753e-08	0.313128	0.342	0.274	0.00276489
Reck	1.08865e-07	0.356315	0.292	0.225	0.00304799
Nedd4	1.27257e-07	0.258904	0.604	0.542	0.00356294
Stx6	1.35143e-07	0.330398	0.267	0.201	0.00378374
Csnk1a1	1.49957e-07	0.328139	0.454	0.397	0.00419849
Fam208a	1.51633e-07	0.321215	0.379	0.313	0.00424541
Fnip1	1.70319e-07	0.287051	0.34	0.269	0.00476859
Evi5	1.74227e-07	0.321057	0.364	0.298	0.00487799
Rhobtb3	1.79434e-07	0.375555	0.272	0.206	0.0050238
Ampd3	1.81887e-07	-0.258499	0.404	0.498	0.00509248
Kif3c	1.99827e-07	-0.268054	0.265	0.349	0.00559476
Rock1	2.17839e-07	0.297248	0.496	0.434	0.00609906
Hsp90ab1	2.21934e-07	0.321351	0.306	0.242	0.0062137
Cmip	2.2276e-07	0.292576	0.573	0.528	0.00623683
Itsn2	2.52267e-07	0.343626	0.443	0.386	0.00706298
Tmcc3	2.60144e-07	0.260262	0.598	0.547	0.00728351
Rufy1	2.85953e-07	0.332907	0.303	0.232	0.0080061
Rapgef6	2.91179e-07	0.336762	0.372	0.309	0.00815243
Grb14	3.40628e-07	0.296121	0.39	0.317	0.0095369
Srsf5	3.74177e-07	0.353599	0.356	0.302	0.0104762
RP23-32A8.5	4.31753e-07	0.307472	0.307	0.241	0.0120882
Ulk2	4.56499e-07	0.30652	0.438	0.377	0.0127811
Btaf1	4.98587e-07	0.283786	0.351	0.286	0.0139594
Vmp1	5.47377e-07	0.28515	0.4	0.334	0.0153255
Ldlrad3	5.52673e-07	0.318782	0.339	0.272	0.0154737
Anks1	6.13217e-07	0.281662	0.256	0.189	0.0171689
Kat6b	6.7675e-07	0.300073	0.493	0.44	0.0189476
Chd3	7.0347e-07	0.322279	0.262	0.195	0.0196958
Slc10a7	7.06673e-07	0.359064	0.283	0.222	0.0197854
Jmjd1c	7.21901e-07	0.25911	0.69	0.658	0.0202118
Dennd6a	8.09154e-07	0.314895	0.282	0.219	0.0226547
Sdccag8	9.46365e-07	0.315532	0.305	0.241	0.0264963
Mnat1	1.06495e-06	0.286498	0.308	0.246	0.0298164
Bbs9	1.2616e-06	0.27159	0.32	0.259	0.0353222
Ap3b1	1.47575e-06	0.261093	0.396	0.336	0.041318
AU040320	1.68214e-06	0.280995	0.334	0.27	0.0470966
Sptbn1	1.70964e-06	0.264864	0.531	0.491	0.0478665
Sos2	1.72408e-06	0.306323	0.336	0.276	0.0482709
Zfp950	1.94583e-06	0.333124	0.371	0.315	0.0544793
Prpf4b	1.99466e-06	0.281521	0.475	0.425	0.0558466
Usp48	2.14385e-06	0.286194	0.271	0.21	0.0600236
Xrn1	2.35402e-06	0.264689	0.46	0.407	0.0659078
Cpeb3	2.36705e-06	0.281531	0.567	0.53	0.0662727
Trim2	2.58198e-06	0.328342	0.347	0.289	0.0722903
Crebzf	2.6708e-06	0.265242	0.362	0.3	0.074777
Anapc5	2.73009e-06	0.271295	0.266	0.206	0.0764372
Dennd1b	3.02514e-06	0.277364	0.375	0.315	0.0846979
Klc1	3.08209e-06	0.281183	0.302	0.245	0.0862924
Hnrnpl	3.1534e-06	0.283213	0.323	0.264	0.0882889
Abi1	3.21438e-06	0.253017	0.373	0.311	0.0899963
Asxl2	3.61918e-06	0.259767	0.401	0.34	0.10133
Cyld	3.67208e-06	0.25418	0.514	0.469	0.102811
Tjp1	3.97455e-06	0.254134	0.687	0.661	0.111279
Cntnap2	4.96363e-06	-0.26251	0.275	0.356	0.138972
Map3k5	5.53059e-06	0.327368	0.276	0.221	0.154846
Nfyc	5.57795e-06	0.275729	0.274	0.214	0.156171
Aebp2	6.17169e-06	0.266421	0.262	0.203	0.172795
Pld1	6.40017e-06	0.324444	0.335	0.28	0.179192
Nebl	6.50308e-06	0.32879	0.637	0.616	0.182073
Ube2h	6.57524e-06	0.294159	0.41	0.355	0.184094
Ckap5	6.69903e-06	0.269983	0.342	0.278	0.18756
Mllt10	6.87672e-06	0.257999	0.528	0.486	0.192534
2010111I01Rik	8.14397e-06	0.266047	0.554	0.515	0.228015
Map1b	8.15894e-06	0.375792	0.357	0.307	0.228434
Micu1	8.71815e-06	0.304827	0.34	0.287	0.244091
Gm37679	8.77745e-06	0.307603	0.282	0.226	0.245751
Creb1	8.91995e-06	0.308456	0.275	0.224	0.249741
Tcf20	1.02883e-05	0.29664	0.38	0.323	0.288052
Ftx	1.10925e-05	0.283681	0.276	0.222	0.310568
Hepacam	1.1913e-05	0.2568	0.458	0.411	0.333539
Kdm5b	1.36192e-05	0.280555	0.262	0.21	0.381312
Hnrnpc	1.4046e-05	0.253507	0.326	0.272	0.393259
Rap1a	1.51716e-05	0.288031	0.282	0.226	0.424774
Zfp609	1.54656e-05	0.269186	0.491	0.443	0.433005
Os9	1.66055e-05	0.261105	0.288	0.235	0.46492
Arhgef28	1.74786e-05	0.260296	0.442	0.399	0.489367
Atrn	1.81325e-05	0.312556	0.375	0.328	0.507673
Kcnq1	1.86703e-05	0.257593	0.46	0.41	0.522731
Med13	1.94343e-05	0.265257	0.345	0.294	0.544123
Ywhae	1.976e-05	0.274057	0.377	0.326	0.553241
Rnf13	2.26905e-05	0.279055	0.264	0.211	0.635289
Tet2	2.43774e-05	0.282706	0.285	0.234	0.682519
Atp5a1	2.52356e-05	0.250305	0.276	0.222	0.706547
Mtmr10	2.82169e-05	0.284189	0.287	0.235	0.790017
Ppp1r10	2.90109e-05	0.26026	0.25	0.197	0.812248
Vps13a	2.92179e-05	0.263957	0.365	0.314	0.818043
Dyrk1a	2.95864e-05	0.280988	0.365	0.315	0.82836
Ino80dos	2.98349e-05	0.279012	0.352	0.304	0.835318
Picalm	3.3107e-05	0.264409	0.31	0.259	0.92693
Creb3l2	3.49551e-05	0.253977	0.268	0.215	0.978672
Dcaf6	4.50848e-05	0.250867	0.397	0.349	1
Ank	4.71976e-05	0.274129	0.394	0.346	1
Ubl3	4.74768e-05	0.307049	0.27	0.224	1
Ints6	5.15349e-05	0.260146	0.265	0.216	1
Nrf1	5.98697e-05	0.265548	0.428	0.392	1
Polb	6.14885e-05	0.253071	0.32	0.271	1
Usp47	6.42891e-05	0.25663	0.367	0.319	1
Zfp638	7.6641e-05	0.254061	0.538	0.512	1
P2rx7	7.94869e-05	0.265328	0.341	0.292	1
Ttyh1	8.56421e-05	0.275371	0.363	0.324	1
Mdm4	0.000100003	0.252702	0.338	0.295	1
Gkap1	0.000120083	0.293551	0.283	0.241	1
Lyrm4	0.000122292	0.295353	0.272	0.224	1
RP24-127M20.8	0.000125169	0.277965	0.378	0.34	1
Osbpl1a	0.000158772	0.298704	0.273	0.23	1
Rc3h1	0.000179114	0.268969	0.369	0.334	1
Nkx2-2os	0.000192799	0.308955	0.25	0.205	1
Ube2g1	0.000199946	0.258178	0.292	0.246	1
Pde3a	0.000220366	0.292394	0.292	0.245	1
Abl1	0.000263938	0.26419	0.283	0.239	1
Pogz	0.000288525	0.252641	0.285	0.241	1
Xiap	0.000374814	0.273767	0.295	0.257	1
Lrig2	0.00041515	0.253016	0.305	0.268	1
Urgcp	0.000617845	0.252974	0.257	0.219	1
Syne2	0.000690216	0.250235	0.323	0.286	1
Elf2	0.000757642	0.273662	0.265	0.229	1
Cyp7b1	0.000946691	0.267039	0.35	0.315	1
Frmd5	0.00414256	0.369695	0.566	0.571	1
Plxdc2	0.0105136	0.257964	0.357	0.333	1

## Sheet: allOL_cluster0n1n4_R62vsNT
Column1	p_val	avg_log2FC	pct.1	pct.2	p_val_adj
Qk	0	-0.634105	0.949	0.985	0
Alk	0	1.4687	0.274	0.032	0
Malat1	0	-0.26622	1	1	0
March1	1.46421e-295	0.976856	0.78	0.559	4.0995e-291
Plp1	1.15849e-288	-0.630255	0.924	0.952	3.24353e-284
Fnbp1	7.52695e-277	-0.545871	0.919	0.953	2.1074e-272
Ctnna2	7.4714e-265	0.851776	0.846	0.701	2.09184e-260
Polr2a	1.05895e-259	1.06683	0.377	0.12	2.96484e-255
Tmeff2	1.26471e-251	-0.482774	0.984	0.985	3.54092e-247
Sema6d	8.18323e-251	0.999048	0.691	0.464	2.29114e-246
St6galnac3	2.78561e-247	-0.584132	0.908	0.939	7.79915e-243
Lrrc4c	1.52013e-244	0.690734	0.911	0.816	4.25607e-240
Sept7	6.0093e-237	-0.717414	0.649	0.802	1.68249e-232
Gm16168	8.89681e-227	-0.806148	0.655	0.806	2.49093e-222
Brinp3	1.01138e-226	1.06333	0.373	0.133	2.83167e-222
Pacrg	4.90365e-222	-0.725053	0.715	0.854	1.37292e-217
Cadm2	1.92231e-219	0.581087	0.917	0.814	5.38207e-215
Nckap5	5.34237e-219	0.897455	0.458	0.196	1.49576e-214
Pde4b	1.34314e-216	-0.353533	0.998	0.998	3.76053e-212
Grm3	3.39485e-214	-0.652665	0.684	0.833	9.50491e-210
Phlpp1	5.4779e-210	-0.46991	0.949	0.962	1.5337e-205
Plcl1	2.65796e-201	-0.463461	0.97	0.979	7.44176e-197
Smoc1	1.58423e-191	0.851454	0.309	0.1	4.43553e-187
Gab2	2.39901e-168	0.745638	0.49	0.255	6.71676e-164
Grid2	1.36927e-165	0.588654	0.858	0.751	3.83367e-161
Pde8a	2.89849e-165	-0.648736	0.579	0.733	8.11518e-161
Ptprd	5.73999e-161	-0.350483	0.986	0.984	1.60708e-156
Luzp2	1.37049e-160	0.815351	0.372	0.163	3.83709e-156
Tmtc2	1.52903e-156	0.703993	0.682	0.484	4.28097e-152
Enpp6	3.17585e-153	0.671275	0.452	0.223	8.89174e-149
Nkain2	2.30297e-152	-0.267451	0.995	0.989	6.44785e-148
Thsd7a	4.88782e-152	0.797306	0.454	0.243	1.36849e-147
Car2	1.34017e-150	-0.662753	0.444	0.635	3.75222e-146
Pcdh15	6.89838e-149	0.688838	0.61	0.388	1.93141e-144
Mobp	2.04511e-140	-0.610452	0.649	0.742	5.72589e-136
Map7	2.23767e-135	-0.445005	0.88	0.896	6.26502e-131
Dscam	2.3716e-135	0.532391	0.315	0.13	6.64001e-131
Fhit	2.4665e-132	0.878468	0.269	0.105	6.9057e-128
Neat1	3.37773e-130	-0.888787	0.313	0.488	9.45696e-126
Csmd3	1.25718e-128	0.420312	0.91	0.834	3.51985e-124
Prkd1	2.48295e-128	0.727462	0.256	0.097	6.95178e-124
Ncam2	4.15088e-128	0.432197	0.915	0.828	1.16216e-123
Abca1	1.14037e-122	0.635466	0.36	0.175	3.1928e-118
Naaladl2	1.72185e-121	0.535242	0.761	0.599	4.82085e-117
Erbb2ip	2.06163e-116	-0.512951	0.684	0.777	5.77215e-112
Pak1	6.26579e-116	-0.539246	0.663	0.757	1.7543e-111
Cadm1	2.24663e-112	0.582128	0.53	0.333	6.29013e-108
Tspan2	1.21751e-111	-0.59539	0.461	0.617	3.40879e-107
2610035D17Rik	1.41058e-111	0.537994	0.626	0.429	3.94935e-107
Il1rapl1	6.92892e-111	0.444425	0.854	0.738	1.93996e-106
Kcnk13	7.96919e-111	-0.686225	0.276	0.449	2.23121e-106
Enah	2.47172e-105	0.608942	0.373	0.198	6.92032e-101
Dpyd	1.0344e-101	0.588153	0.368	0.195	2.89612e-97
Mast4	1.1822e-101	-0.365483	0.943	0.942	3.30993e-97
Macrod2	1.28618e-99	0.578562	0.614	0.443	3.60105e-95
A330015K06Rik	5.79228e-99	-0.725561	0.202	0.36	1.62172e-94
Ctnnd2	7.13867e-99	0.561243	0.505	0.324	1.99868e-94
Erbb4	1.59538e-98	0.351052	0.933	0.833	4.46674e-94
Aspa	1.03936e-97	-0.46797	0.739	0.804	2.91e-93
Mal	4.59667e-97	-0.685827	0.292	0.443	1.28697e-92
Rab30	1.34738e-96	0.573155	0.302	0.148	3.77238e-92
Pacsin1	4.09013e-96	0.59269	0.293	0.14	1.14515e-91
Dock10	2.90353e-95	-0.294585	0.976	0.977	8.1293e-91
Mob3b	2.9366e-91	0.505544	0.488	0.304	8.22189e-87
Anks1b	1.17887e-90	0.369552	0.868	0.73	3.30061e-86
Kcnab1	1.92314e-90	-0.656829	0.278	0.431	5.38442e-86
Cdh2	3.9561e-89	0.552886	0.516	0.34	1.10763e-84
Zfand6	1.45827e-86	0.517045	0.418	0.254	4.08287e-82
Zeb2	1.71766e-86	-0.340368	0.934	0.936	4.80911e-82
Mdga2	6.41121e-84	0.392467	0.861	0.767	1.79501e-79
Rasal2	2.67737e-81	0.462142	0.483	0.312	7.4961e-77
Dusp15	6.37037e-81	0.558729	0.253	0.124	1.78358e-76
Onecut2	1.114e-80	0.550555	0.257	0.126	3.11898e-76
Lama2	6.4528e-79	0.578266	0.458	0.305	1.80665e-74
Fa2h	1.53567e-78	-0.415061	0.724	0.782	4.29957e-74
Tjp1	1.91395e-78	0.432639	0.614	0.448	5.35866e-74
Ddx5	4.94809e-78	0.497678	0.564	0.411	1.38537e-73
Kirrel3	6.69908e-78	-0.717946	0.341	0.486	1.87561e-73
Palm2	9.8882e-78	-0.704089	0.407	0.528	2.7685e-73
Adgrb3	1.07704e-77	0.537261	0.552	0.403	3.01549e-73
Cldn11	1.57543e-77	-0.546763	0.395	0.52	4.41088e-73
Lsamp	1.12438e-76	0.337234	0.726	0.615	3.14803e-72
Heg1	5.91294e-74	0.463778	0.486	0.319	1.6555e-69
Dync1i1	5.02803e-73	0.502466	0.269	0.138	1.40775e-68
Adgrl3	6.37684e-73	0.474821	0.496	0.338	1.78539e-68
Bin1	1.23365e-72	-0.386314	0.722	0.78	3.45396e-68
Abca8a	3.22791e-71	0.510808	0.267	0.138	9.03751e-67
Rps6ka5	3.35738e-71	0.430569	0.558	0.401	9.39998e-67
Frmd5	1.62804e-69	-0.262048	0.976	0.974	4.55817e-65
Dock9	2.99492e-69	0.395183	0.639	0.49	8.38519e-65
Negr1	4.71424e-69	0.465656	0.551	0.397	1.31989e-64
Tenm2	2.5001e-68	-0.704577	0.444	0.545	6.99977e-64
Smad7	5.95833e-68	-0.461948	0.543	0.636	1.66821e-63
Enox1	6.78757e-68	-0.45032	0.586	0.675	1.90038e-63
Clmn	7.44401e-68	-0.42635	0.547	0.65	2.08417e-63
Zbtb20	4.78085e-67	0.282162	0.919	0.842	1.33854e-62
Nfe2l3	1.06284e-66	0.423445	0.476	0.318	2.97573e-62
Nalcn	2.17547e-66	0.430747	0.462	0.308	6.09089e-62
Nlgn1	2.53232e-66	0.375063	0.799	0.699	7.09e-62
Slc1a3	1.58098e-65	0.442646	0.39	0.244	4.42644e-61
Vmp1	1.72511e-65	-0.357552	0.768	0.811	4.82998e-61
Edil3	2.69173e-65	-0.267802	0.958	0.955	7.53632e-61
Dst	7.08175e-65	0.319772	0.795	0.666	1.98275e-60
Cald1	1.96549e-64	0.432685	0.435	0.288	5.50299e-60
Cadps	1.51439e-63	0.503397	0.337	0.202	4.23998e-59
Cdc42bpa	4.18468e-63	-0.386357	0.775	0.808	1.17163e-58
Cdk19	2.86001e-62	-0.38887	0.785	0.804	8.00746e-58
Srgap3	7.18536e-61	0.405606	0.475	0.327	2.01176e-56
Ccser2	4.01707e-60	0.415556	0.285	0.163	1.1247e-55
Pde1c	1.29822e-59	0.405839	0.439	0.291	3.63475e-55
Acaca	4.64556e-58	0.375726	0.669	0.539	1.30066e-53
Adamtsl1	1.72506e-57	0.427099	0.382	0.242	4.82982e-53
Dmd	1.26935e-56	0.434576	0.438	0.298	3.55392e-52
Mboat2	6.64676e-56	0.421208	0.321	0.196	1.86096e-51
Gm42413	2.98612e-55	-0.4643	0.411	0.519	8.36055e-51
Ppp1r16b	7.1391e-55	-0.350536	0.797	0.828	1.9988e-50
Pde4dip	1.16374e-54	0.351034	0.517	0.369	3.25824e-50
Npas3	2.93375e-54	0.29313	0.803	0.698	8.21391e-50
Tcf4	4.93063e-54	0.277866	0.841	0.73	1.38048e-49
Ccnl2	5.6901e-54	0.404726	0.417	0.285	1.59311e-49
Cntn3	1.43178e-53	0.421779	0.417	0.285	4.0087e-49
Pex5l	3.08861e-53	-0.444262	0.852	0.844	8.6475e-49
Tra2a	6.40419e-53	0.367951	0.53	0.393	1.79305e-48
Akt3	9.70528e-53	0.369712	0.425	0.289	2.71728e-48
Pde4d	4.64796e-52	0.4024	0.512	0.38	1.30134e-47
Tln2	9.99089e-52	0.403196	0.301	0.184	2.79725e-47
Sash1	4.28672e-51	0.369093	0.441	0.306	1.2002e-46
Celf2	4.78818e-51	-0.47044	0.378	0.473	1.34059e-46
Arrdc3	1.93733e-50	-0.520021	0.281	0.386	5.42413e-46
Pak7	2.76839e-50	-0.318396	0.764	0.796	7.75094e-46
Gria2	3.27433e-50	0.360039	0.479	0.34	9.16747e-46
Hspa8	1.19539e-49	0.415538	0.258	0.151	3.34684e-45
Apbb2	1.34877e-49	0.277266	0.735	0.611	3.77627e-45
Sgms1	6.16672e-49	0.384788	0.259	0.152	1.72656e-44
Dgki	1.20317e-48	0.267435	0.773	0.658	3.36863e-44
Spag9	1.50488e-48	0.320432	0.609	0.479	4.21336e-44
Usp25	2.27334e-48	0.355588	0.349	0.228	6.3649e-44
Nav3	4.14134e-48	0.488087	0.309	0.197	1.15949e-43
Nrxn3	4.42972e-48	-0.55963	0.292	0.388	1.24023e-43
Apod	6.26099e-48	0.29755	0.598	0.458	1.75295e-43
Fgf1	7.79603e-48	0.373274	0.272	0.162	2.18273e-43
Wls	1.17294e-47	0.356465	0.357	0.233	3.284e-43
Ugt8a	1.77042e-47	-0.377737	0.631	0.677	4.95681e-43
Foxp1	1.83195e-47	0.349339	0.466	0.334	5.1291e-43
Kcnip4	1.84965e-47	-0.526447	0.303	0.401	5.17866e-43
Metap1d	1.96535e-47	0.393424	0.304	0.193	5.5026e-43
Hcn2	2.40281e-47	0.332692	0.362	0.235	6.72738e-43
Slain1	3.02754e-47	-0.387252	0.556	0.62	8.47651e-43
Map2	7.16229e-47	0.371253	0.39	0.265	2.0053e-42
Anln	3.15036e-46	0.290879	0.579	0.432	8.82039e-42
Mpped2	4.79124e-46	0.371526	0.261	0.156	1.34145e-41
Smarca2	7.35538e-46	0.345319	0.379	0.254	2.05936e-41
Pafah1b1	8.24285e-46	0.271637	0.722	0.589	2.30783e-41
Pbx3	3.07256e-45	0.412294	0.294	0.186	8.60256e-41
Tanc2	3.57933e-45	0.346151	0.55	0.42	1.00214e-40
Rev3l	1.01123e-44	0.329234	0.441	0.313	2.83125e-40
Ogt	1.32519e-44	0.334786	0.501	0.371	3.71026e-40
Ccdc88a	4.85741e-44	0.30288	0.671	0.552	1.35998e-39
Dpy19l1	2.44929e-43	-0.470502	0.423	0.5	6.85753e-39
Ugp2	2.75246e-43	0.343434	0.315	0.204	7.70635e-39
Aplp2	5.01107e-43	0.305121	0.406	0.279	1.403e-38
Strn3	6.00296e-43	0.322027	0.521	0.394	1.68071e-38
Lrrc8d	9.47502e-43	0.329139	0.495	0.367	2.65282e-38
Gm26804	2.58226e-42	0.301131	0.687	0.564	7.22981e-38
Abtb2	3.07888e-42	0.306393	0.367	0.25	8.62025e-38
Son	5.13177e-42	0.278891	0.69	0.569	1.43679e-37
Rtn4	5.42474e-42	-0.272295	0.808	0.817	1.51882e-37
Taf15	1.27128e-41	0.316676	0.339	0.224	3.55932e-37
Ncoa1	5.73807e-41	0.293921	0.529	0.398	1.60655e-36
Kcnq1ot1	7.29939e-41	0.326788	0.448	0.326	2.04368e-36
Fam234a	4.85982e-40	0.310636	0.369	0.254	1.36065e-35
Map4k4	6.18015e-40	0.252836	0.718	0.593	1.73032e-35
Tnrc6b	2.97419e-39	0.268507	0.639	0.52	8.32713e-35
Gm11437	5.56802e-39	0.313366	0.272	0.172	1.55893e-34
Ulk2	7.55626e-39	0.319026	0.415	0.298	2.1156e-34
Arhgap26	1.15719e-38	0.325492	0.276	0.177	3.23991e-34
Sybu	1.26958e-38	0.325819	0.337	0.226	3.55457e-34
Sccpdh	2.41217e-38	0.312618	0.314	0.21	6.75359e-34
Nfia	2.45378e-38	0.256912	0.771	0.668	6.87008e-34
Sertad2	3.71491e-38	0.336288	0.282	0.182	1.0401e-33
Rora	4.99797e-38	0.395451	0.31	0.21	1.39933e-33
Lrch3	6.85289e-38	0.272548	0.53	0.404	1.91867e-33
Hecw2	7.29281e-38	-0.323119	0.779	0.789	2.04184e-33
Rnf220	2.31972e-37	-0.256331	0.945	0.92	6.49476e-33
Cacna2d1	8.33241e-37	0.341033	0.294	0.194	2.33291e-32
Myo18a	9.87286e-37	-0.407774	0.381	0.464	2.7642e-32
Gng12	1.23203e-36	0.304357	0.336	0.229	3.44945e-32
Atp9a	1.79111e-36	0.289328	0.445	0.326	5.01475e-32
Rsrc1	6.22796e-36	0.295208	0.419	0.304	1.74371e-31
Fgf14	6.8616e-36	-0.514097	0.214	0.294	1.92111e-31
Csmd2	8.73299e-36	0.258504	0.545	0.417	2.44506e-31
Gpr137c	2.6673e-35	0.322992	0.262	0.17	7.46791e-31
Phactr4	3.75061e-35	0.304478	0.331	0.23	1.0501e-30
Polb	5.07647e-35	0.295682	0.311	0.21	1.42131e-30
Tbc1d23	7.27695e-35	0.305271	0.262	0.169	2.0374e-30
Rdx	1.20253e-34	0.279932	0.348	0.241	3.36683e-30
Kcna1	2.60915e-34	-0.438412	0.258	0.342	7.30511e-30
Tmod1	9.64386e-34	-0.421296	0.229	0.314	2.70009e-29
Tmeff1	1.40423e-33	-0.404439	0.432	0.495	3.93158e-29
Rmdn1	1.68805e-33	0.270105	0.335	0.23	4.7262e-29
Crebzf	1.89352e-33	0.282594	0.336	0.234	5.30149e-29
Reps2	2.09883e-33	0.294738	0.407	0.298	5.87632e-29
Gab1	2.49113e-33	-0.303834	0.692	0.722	6.97468e-29
Btaf1	3.02027e-33	0.280599	0.332	0.229	8.45616e-29
Ptprk	3.12805e-33	-0.334193	0.713	0.723	8.75791e-29
Anapc5	4.43061e-33	0.285877	0.267	0.175	1.24048e-28
Trim2	8.59283e-33	-0.3047	0.675	0.705	2.40582e-28
Meg3	1.546e-32	-0.287588	0.738	0.767	4.32848e-28
Lncpint	4.38974e-32	0.277528	0.43	0.32	1.22904e-27
Elf1	4.67835e-32	0.300535	0.304	0.209	1.30984e-27
Npsr1	6.73731e-32	-0.550764	0.418	0.481	1.88631e-27
Ppp1r12a	9.2345e-32	0.271195	0.476	0.361	2.58548e-27
Nr6a1	1.40658e-31	0.278094	0.305	0.209	3.93815e-27
Cyp2j12	2.48205e-31	0.30547	0.279	0.188	6.94924e-27
Acyp2	2.50046e-31	0.278972	0.318	0.22	7.0008e-27
Tfdp2	3.17955e-31	0.283032	0.39	0.284	8.90211e-27
Ankub1	3.66643e-31	0.276748	0.294	0.199	1.02653e-26
Tmod2	4.69511e-31	-0.392885	0.375	0.452	1.31454e-26
RP24-127M20.8	5.26301e-31	0.323451	0.33	0.235	1.47354e-26
Prkcq	5.51432e-31	0.266744	0.432	0.322	1.5439e-26
Phf14	8.41765e-31	0.275535	0.444	0.336	2.35677e-26
Rnf43	1.21187e-30	0.270292	0.259	0.17	3.39298e-26
Npc1	2.00737e-30	0.266666	0.271	0.18	5.62024e-26
Ppfia2	2.44407e-30	0.287568	0.375	0.273	6.84291e-26
Prpf4b	5.44579e-30	0.256541	0.394	0.289	1.52471e-25
1700111E14Rik	1.14181e-29	0.267757	0.28	0.19	3.19684e-25
Kcnq1	1.97266e-29	0.259526	0.306	0.212	5.52304e-25
Scg5	3.16288e-29	0.271508	0.261	0.174	8.85544e-25
Kdm3b	5.19528e-29	0.264228	0.265	0.179	1.45457e-24
Gnao1	1.06383e-28	-0.269892	0.745	0.756	2.9785e-24
Nrxn2	1.66323e-28	0.255167	0.364	0.263	4.6567e-24
Lpgat1	2.65137e-28	-0.333611	0.47	0.53	7.42332e-24
Sec61a2	4.12706e-28	0.257474	0.309	0.216	1.15549e-23
St3gal4	6.53842e-28	0.281184	0.364	0.27	1.83063e-23
Jarid2	2.17042e-27	0.255044	0.398	0.3	6.07675e-23
Ubl3	8.52575e-27	0.261826	0.258	0.175	2.38704e-22
Akr1b3	2.09169e-26	-0.404364	0.249	0.317	5.85633e-22
Ext1	4.78263e-26	0.265718	0.492	0.395	1.33904e-21
Bcl2l1	7.40641e-26	-0.360368	0.465	0.516	2.07365e-21
Kcna6	8.11544e-26	-0.381974	0.209	0.28	2.27216e-21
Kazn	1.64224e-25	-0.323134	0.379	0.444	4.59794e-21
Daam2	2.01147e-25	-0.358995	0.567	0.594	5.63171e-21
Glul	4.98271e-25	-0.417992	0.233	0.3	1.39506e-20
Eif2s3y	5.67533e-25	0.257459	0.337	0.249	1.58898e-20
Pcyt2	6.14188e-25	-0.370032	0.381	0.441	1.7196e-20
Ninj2	1.10772e-24	-0.288457	0.398	0.475	3.1014e-20
Lrrc4	2.77835e-24	0.265606	0.316	0.232	7.77882e-20
Gjc3	1.19244e-23	-0.276522	0.525	0.569	3.33858e-19
Epn2	4.50475e-22	-0.273935	0.53	0.57	1.26124e-17
Kif13a	7.58421e-22	-0.27708	0.708	0.715	2.12343e-17
Nrg1	1.83679e-21	-0.401436	0.219	0.279	5.14264e-17
Scd2	3.61528e-21	-0.350344	0.346	0.4	1.01221e-16
Pik3c2b	4.5857e-21	-0.316698	0.419	0.467	1.2839e-16
Srgap1	1.31635e-20	-0.341337	0.344	0.404	3.68551e-16
Ptgds	1.32177e-20	-0.476471	0.352	0.392	3.7007e-16
4930419G24Rik	1.34125e-20	-0.363554	0.536	0.562	3.75524e-16
Trim59	1.96339e-20	-0.347087	0.214	0.274	5.49709e-16
Daam1	1.24578e-19	-0.267983	0.597	0.619	3.48793e-15
Qdpr	6.69473e-19	-0.320533	0.207	0.263	1.87439e-14
Nrbp2	9.29585e-19	-0.303848	0.362	0.41	2.60265e-14
Nkain1	2.86766e-18	-0.276181	0.536	0.567	8.02889e-14
Sez6l2	2.94708e-18	-0.324481	0.375	0.423	8.25124e-14
Pstpip2	3.19604e-17	-0.287857	0.489	0.525	8.94827e-13
Synpr	5.57564e-17	-0.387514	0.194	0.251	1.56107e-12
Pllp	8.08133e-17	-0.288395	0.206	0.262	2.26261e-12
Apoe	9.23476e-17	-0.2712	0.363	0.415	2.58555e-12
Cerk	1.70291e-16	-0.330485	0.249	0.305	4.7678e-12
Kcnd2	2.27788e-16	-0.328071	0.204	0.254	6.37762e-12
Ckb	5.31896e-16	-0.319695	0.224	0.273	1.4892e-11
Zbtb16	1.07276e-14	-0.81971	0.258	0.284	3.0035e-10
Cntnap2	2.67243e-14	-0.335348	0.211	0.259	7.48226e-10
Grm5	2.85085e-14	-0.303096	0.266	0.311	7.9818e-10
Syt1	5.66562e-14	-0.35531	0.207	0.251	1.58626e-09
Gm37459	7.24849e-14	-0.271912	0.387	0.432	2.02943e-09
Fam13c	5.1676e-13	-0.29229	0.254	0.3	1.44682e-08
Phactr3	7.39723e-13	-0.304903	0.367	0.399	2.07108e-08
Kctd3	1.20218e-12	-0.29314	0.274	0.314	3.36585e-08
Ube2d1	1.60679e-12	-0.250486	0.351	0.39	4.49869e-08
Sh3gl3	2.07255e-12	-0.279557	0.296	0.335	5.80273e-08
Stmn4	2.97296e-12	-0.267163	0.303	0.341	8.32369e-08
Oxr1	9.98575e-12	-0.352049	0.341	0.372	2.79581e-07
Tjap1	1.25998e-11	-0.273213	0.222	0.263	3.52769e-07
Efnb3	1.99014e-11	-0.261224	0.306	0.341	5.572e-07
Micall1	6.54563e-11	-0.258334	0.325	0.359	1.83265e-06
Cnp	6.87969e-11	-0.25768	0.262	0.298	1.92617e-06
Add1	9.22464e-11	-0.271228	0.372	0.401	2.58271e-06
Cpm	1.20136e-09	-0.280559	0.28	0.313	3.36356e-05
Dennd5b	5.06857e-09	-0.302445	0.268	0.3	0.00014191
Slc25a13	8.60051e-09	-0.287089	0.387	0.406	0.000240797
Gm10701	3.04056e-08	-0.311495	0.346	0.373	0.000851296
Slc38a2	6.05858e-08	-0.275438	0.359	0.38	0.00169628
Csmd1	3.64278e-05	-0.322548	0.279	0.302	1
Spock1	0.00243153	-0.275895	0.31	0.318	1
Grm7	0.112573	-0.340885	0.562	0.531	1
