# Supplementary material for: Huntington disease oligodendrocyte maturation deficits revealed by single-nucleus RNAseq are rescued by thiamine-biotin supplementation
Source: Nat Commun. 2022 Dec 21;13:7791. doi: 10.1038/s41467-022-35388-x (PMC9772349; doi:10.1038/s41467-022-35388-x)
Supplement: Supplementary file 5 — Supplementary Dataset 3 [file 41467_2022_35388_MOESM5_ESM.xlsx]

## Sheet: Supplementary Table 2 - Mouse W
Mouse WGCNA			cWGCNA
mouseGene	color		mouseGene	color	humanGene
Sept4	blue		Zdhhc20	blue	ZDHHC20
Sept7	blue		App	blue	APP
1700047M11Rik	blue		Enox1	blue	ENOX1
4930419G24Rik	blue		Ptprd	blue	PTPRD
5031439G07Rik	blue		Mob3b	blue	MOB3B
A230001M10Rik	blue		Slc24a2	blue	SLC24A2
Aatk	blue		Pcdh9	blue	PCDH9
Abca2	blue		Gpm6b	blue	GPM6B
Abca8a	blue		Slain1	blue	SLAIN1
Abhd17b	blue		Aspa	blue	ASPA
Acaca	blue		Adipor2	blue	ADIPOR2
Adipor2	blue		Dpysl2	blue	DPYSL2
Agap1	blue		Mbnl2	blue	MBNL2
Ank	blue		Lgi3	blue	LGI3
Ank2	blue		Tppp	blue	TPPP
Ankrd28	blue		Itch	blue	ITCH
Ankub1	blue		Plxdc2	blue	PLXDC2
Anln	blue		5031439G07Rik	blue	KIAA0930
Ano4	blue		Pip4k2a	blue	PIP4K2A
Apbb2	blue		Qdpr	blue	QDPR
Apod	blue		Anln	blue	ANLN
App	blue		Kif13b	blue	KIF13B
Arhgap23	blue		Mog	blue	MOG
Arhgef10	blue		Osbpl1a	blue	OSBPL1A
Arhgef28	blue		Ctnna3	blue	CTNNA3
Arrdc3	blue		Elmo1	blue	ELMO1
Arsg	blue		Mtus1	blue	MTUS1
Aspa	blue		Ywhaq	blue	YWHAQ
Atp8a1	blue		Dock5	blue	DOCK5
Baz2b	blue		Wnk1	blue	WNK1
Bcas1	blue		Ank3	blue	ANK3
Bcas1os2	blue		Ninj2	blue	NINJ2
Bcl2l1	blue		Ppp1r16b	blue	PPP1R16B
Bin1	blue		Creb5	blue	CREB5
Car2	blue		Sec14l5	blue	SEC14L5
Ccp110	blue		Kif6	blue	KIF6
Cd9	blue		Tcf12	blue	TCF12
Cdc37l1	blue		Myo1d	blue	MYO1D
Cdc42bpa	blue		Prr5l	blue	PRR5L
Cdh10	blue		Slc44a1	blue	SLC44A1
Cdh19	blue		Daam2	blue	DAAM2
Cdh20	blue		Atp8a1	blue	ATP8A1
Cdk19	blue		Slc12a2	blue	SLC12A2
Chd7	blue		Mbp	blue	MBP
Clasp2	blue		Mag	blue	MAG
Cldn11	blue		Plekhh1	blue	PLEKHH1
Clic4	blue		Exoc6b	blue	EXOC6B
Clmn	blue		Elovl7	blue	ELOVL7
Cmss1	blue		Ankib1	blue	ANKIB1
Cnp	blue		Ndrg1	blue	NDRG1
Cntn2	blue		Padi2	blue	PADI2
Cobll1	blue		Usp31	blue	USP31
Cpm	blue		Clic4	blue	CLIC4
Creb5	blue		Zfp638	blue	ZNF638
Csrp1	blue		Car2	blue	CA2
Ctnna3	blue		Snx30	blue	SNX30
Cyp2j12	blue		St18	blue	ST18
D7Ertd443e	blue		Ccp110	blue	CCP110
Daam1	blue		Mal	blue	MAL
Daam2	blue		Rps6ka5	blue	RPS6KA5
Ddr1	blue		Gas7	blue	GAS7
Dip2a	blue		Myrf	blue	MYRF
Dip2b	blue		Arap2	blue	ARAP2
Dlg1	blue		Opalin	blue	OPALIN
Dnajb2	blue		Cdk19	blue	CDK19
Dnm3	blue		Myo6	blue	MYO6
Dock10	blue		Arhgap23	blue	ARHGAP23
Dock5	blue		Slc48a1	blue	SLC48A1
Dpy19l1	blue		Ppp1r14a	blue	PPP1R14A
Dpysl2	blue		Fnbp1	blue	FNBP1
Dscaml1	blue		Zfp536	blue	ZNF536
Dst	blue		Limch1	blue	LIMCH1
Dusp16	blue		Clasp2	blue	CLASP2
Edil3	blue		Rtn4	blue	RTN4
Efnb3	blue		Mobp	blue	MOBP
Elmo1	blue		Fam102a	blue	FAM102A
Elovl7	blue		Slc25a13	blue	SLC25A13
Enpp2	blue		Dip2b	blue	DIP2B
Enpp6	blue		Ptk2	blue	PTK2
Ephb1	blue		Tspan5	blue	TSPAN5
Epn2	blue		Magi2	blue	MAGI2
Erbb2ip	blue		Aplp1	blue	APLP1
Erbb4	blue		Rasgrp3	blue	RASGRP3
Ermn	blue		Grm3	blue	GRM3
Exoc6b	blue		Garnl3	blue	GARNL3
Fa2h	blue		Ptgds	blue	PTGDS
Fam102a	blue		Phlpp1	blue	PHLPP1
Fgfr2	blue		Plp1	blue	PLP1
Fign	blue		Plekhg3	blue	PLEKHG3
Fmnl2	blue		Frmd4b	blue	FRMD4B
Fnbp1	blue		Cdh19	blue	CDH19
Folh1	blue		Enpp2	blue	ENPP2
Foxn3	blue		Gnao1	blue	GNAO1
Frmd4b	blue		Gprc5b	blue	GPRC5B
Frmd5	blue		Ank2	blue	ANK2
Fryl	blue		Srcin1	blue	SRCIN1
Fth1	blue		Edil3	blue	EDIL3
Gab1	blue		Folh1	blue	FOLH1
Gal3st1	blue		Tacc1	blue	TACC1
Galnt6	blue		Kif1b	blue	KIF1B
Gatm	blue		Frmd5	blue	FRMD5
Gjc3	blue		Myo1e	blue	MYO1E
Gm10701	blue		Lpar1	blue	LPAR1
Gm10863	blue		Spock1	blue	SPOCK1
Gm13905	blue		Ssh2	blue	SSH2
Gm16168	blue		Unc5b	blue	UNC5B
Gm26694	blue		Abca2	blue	ABCA2
Gm37459	blue		Lpgat1	blue	LPGAT1
Gm42413	blue		Zeb2	blue	ZEB2
Gm42418	blue		Dnm3	blue	DNM3
Gna12	blue		Cldn11	blue	CLDN11
Gnao1	blue		Pacs2	blue	PACS2
Gpm6b	blue		Adamts4	blue	ADAMTS4
Gpr37	blue		Stxbp3	blue	STXBP3
Gprc5b	blue		Hhip	blue	HHIP
Grb14	blue		Mapt	blue	MAPT
Grm3	blue		St6galnac3	blue	ST6GALNAC3
Hapln2	blue		Pik3c2b	blue	PIK3C2B
Hecw2	blue		Phldb1	blue	PHLDB1
Heg1	blue		Ano4	blue	ANO4
Hhip	blue		Glul	blue	GLUL
Hipk2	blue		Cntn2	blue	CNTN2
Il1rap	blue		Pkp4	blue	PKP4
Il33	blue		Sort1	blue	SORT1
Insc	blue		Map7	blue	MAP7
Itch	blue		Hecw2	blue	HECW2
Itpk1	blue		Trim59	blue	TRIM59
Kcnk13	blue		Nfasc	blue	NFASC
Kctd13	blue		Cpm	blue	CPM
Kif13a	blue		Sik3	blue	SIK3
Kif13b	blue		Tmem63a	blue	TMEM63A
Kif1b	blue		Pde4b	blue	PDE4B
Kif21a	blue		Tmeff2	blue	TMEFF2
Kif6	blue		Otud7b	blue	OTUD7B
Klhl2	blue		Ermn	blue	ERMN
Kndc1	blue		Bin1	blue	BIN1
Lgi3	blue		Spock3	blue	SPOCK3
Limch1	blue		Eps15	blue	EPS15
Litaf	blue		Slco3a1	blue	SLCO3A1
Lpar1	blue		Hapln2	blue	HAPLN2
Lrp1b	blue		Hipk2	blue	HIPK2
Mag	blue		Gab1	blue	GAB1
Magi1	blue		Ugt8a	blue	UGT8
Magi2	blue		Plcl1	blue	PLCL1
Mal	blue		Pde8a	blue	PDE8A
Malat1	blue		Picalm	blue	PICALM
Map4	blue		D7Ertd443e	blue	C10orf90
Map4k4	blue		Dock10	blue	DOCK10
Map7	blue		Gpr37	blue	GPR37
Mapt	blue		Fgfr2	blue	FGFR2
Mast4	blue		Qk	blue	QKI
Mbnl2	blue		Osbpl9	blue	OSBPL9
Mboat1	blue		Tulp4	blue	TULP4
Mbp	blue		Trim2	blue	TRIM2
Megf10	blue		Plekha1	blue	PLEKHA1
Micall1	blue		Aatk	blue	AATK
Mob3b	blue		Arhgef2	blue	ARHGEF2
Mobp	blue		Dlg1	blue	DLG1
Mog	blue		Shtn1	blue	SHTN1
Myo1d	blue		Dixdc1	blue	DIXDC1
Myo6	blue		Csrp1	blue	CSRP1
Myrf	blue		Synj2	blue	SYNJ2
Naaladl2	blue		Clmn	blue	CLMN
Nbas	blue		Cyth1	blue	CYTH1
Ncam1	blue		Pex5l	blue	PEX5L
Ndrg1	blue		Ttyh2	blue	TTYH2
Neat1	blue		Agpat4	blue	AGPAT4
Neo1	blue		Rnf220	blue	RNF220
Nfasc	blue		Lama2	blue	LAMA2
Nfe2l3	blue		Sh3tc2	blue	SH3TC2
Ninj2	blue		Ypel2	blue	YPEL2
Nkain1	blue		Nkain2	blue	NKAIN2
Nkain2	blue		Carns1	blue	CARNS1
Nkx2-2os	blue		Dnajc6	blue	DNAJC6
Npsr1	blue		Igsf11	blue	IGSF11
Nrbp2	blue		Cnp	blue	CNP
Olfml1	blue		Fa2h	blue	FA2H
Opalin	blue		Ttll7	blue	TTLL7
Otud7b	blue		Frmd4a	brown	FRMD4A
Pacrg	blue		Cnksr2	brown	CNKSR2
Pacs2	blue		Celf2	brown	CELF2
Pafah1b1	blue		Tsc22d1	brown	TSC22D1
Pak1	blue		Slc24a3	brown	SLC24A3
Pak7	blue		Rps6ka3	brown	RPS6KA3
Palm2	blue		Dgkh	brown	DGKH
Pcdh9	blue		Klhl7	brown	KLHL7
Pde4b	blue		Hecw1	brown	HECW1
Pde8a	blue		Thrb	brown	THRB
Pex5l	blue		Setd5	brown	SETD5
Phldb1	blue		Kcnip4	brown	KCNIP4
Phlpp1	blue		Adcy2	brown	ADCY2
Pip4k2a	blue		Fam189a1	brown	FAM189A1
Pkp4	blue		Amph	brown	AMPH
Pla2g16	blue		Pdzd2	brown	PDZD2
Plcl1	blue		Gabrb3	brown	GABRB3
Pld1	blue		Fbxl2	brown	FBXL2
Plekhg1	blue		Erc1	brown	ERC1
Plekhg3	blue		Atp2b2	brown	ATP2B2
Plekhh1	blue		Cdh2	brown	CDH2
Pllp	blue		Gnal	brown	GNAL
Plp1	blue		Xkr6	brown	XKR6
Pls1	blue		Abr	brown	ABR
Plxdc2	blue		Arhgef9	brown	ARHGEF9
Plxnb3	blue		Cdh18	brown	CDH18
Ppfibp2	blue		Vps13a	brown	VPS13A
Ppp1r14a	blue		Cacnb2	brown	CACNB2
Ppp1r16b	blue		Hs6st3	brown	HS6ST3
Ppp2r3a	blue		Plcl2	brown	PLCL2
Prickle2	blue		Tspan7	brown	TSPAN7
Prkcq	blue		Dlgap4	brown	DLGAP4
Prox1	blue		Mtcl1	brown	MTCL1
Prox1os	blue		Syn3	brown	SYN3
Prr5l	blue		Basp1	brown	BASP1
Prrg1	blue		Myt1l	brown	MYT1L
Pstpip2	blue		Ldb2	brown	LDB2
Ptgds	blue		Msra	brown	MSRA
Ptprk	blue		Grm7	brown	GRM7
Qdpr	blue		Myo16	brown	MYO16
Qk	blue		Etl4	brown	KIAA1217
Rab31	blue		Rab3c	brown	RAB3C
Ralgps1	blue		Nell1	brown	NELL1
Rap1a	blue		Gabbr2	brown	GABBR2
Rasgrp3	blue		Spred2	brown	SPRED2
Rassf2	blue		Ctdspl	brown	CTDSPL
Rcbtb1	blue		Grin2b	brown	GRIN2B
Rere	blue		Slc2a13	brown	SLC2A13
Rffl	blue		Homer1	brown	HOMER1
Rftn1	blue		Runx1t1	brown	RUNX1T1
Rnf13	blue		Slc1a2	brown	SLC1A2
Rnf220	blue		Scn8a	brown	SCN8A
RP23-44H21.1	blue		Erc2	brown	ERC2
Rtn4	blue		Rit2	brown	RIT2
Scd2	blue		Dnm1	brown	DNM1
Sec14l5	blue		Mef2c	brown	MEF2C
Sh3d19	blue		Tnrc6a	brown	TNRC6A
Sh3tc2	blue		Khdrbs3	brown	KHDRBS3
Shtn1	blue		Slc4a4	brown	SLC4A4
Sik3	blue		Dmxl2	brown	DMXL2
Slain1	blue		Lrfn5	brown	LRFN5
Slc12a2	blue		Flrt2	brown	FLRT2
Slc13a1	blue		Btrc	brown	BTRC
Slc24a2	blue		Zmym4	brown	ZMYM4
Slc25a13	blue		Trank1	brown	TRANK1
Slc44a1	blue		Nkain3	brown	NKAIN3
Smad7	blue		Sorbs1	brown	SORBS1
Sox10	blue		Plekha5	brown	PLEKHA5
Srcin1	blue		Tln2	brown	TLN2
Ssh2	blue		Nell2	brown	NELL2
St18	blue		Mctp1	brown	MCTP1
St6gal1	blue		Syt16	brown	SYT16
St6galnac3	blue		Snap91	brown	SNAP91
Stxbp3	blue		Ano6	brown	ANO6
Synj2	blue		D430041D05Rik	brown	KIAA1549L
Sytl2	blue		Trim9	brown	TRIM9
Tbc1d5	blue		Neto1	brown	NETO1
Tcf12	blue		Cacna2d3	brown	CACNA2D3
Tfeb	blue		Rgs6	brown	RGS6
Tjp2	blue		Shisa9	brown	SHISA9
Tmbim1	blue		Ablim1	brown	ABLIM1
Tmcc1	blue		Sptan1	brown	SPTAN1
Tmcc3	blue		Ralyl	brown	RALYL
Tmeff1	blue		Camk4	brown	CAMK4
Tmeff2	blue		Pdzrn4	brown	PDZRN4
Tmem178b	blue		Gabrb1	brown	GABRB1
Tmem63a	blue		Strbp	brown	STRBP
Tnfaip6	blue		Nr6a1	brown	NR6A1
Trim2	blue		Npas2	brown	NPAS2
Trim59	blue		Gria1	brown	GRIA1
Tsc22d3	blue		Clstn2	brown	CLSTN2
Tspan15	blue		Syne1	brown	SYNE1
Tspan2	blue		Slc4a10	brown	SLC4A10
Ttll7	blue		Fnbp1l	brown	FNBP1L
Ttyh2	blue		Pknox2	brown	PKNOX2
Tubb4a	blue		Pacs1	brown	PACS1
Tulp4	blue		Nsg2	brown	NSG2
Ube2e2	blue		Kcnt2	brown	KCNT2
Ugt8a	blue		Unc80	brown	UNC80
Unc5b	blue		Kalrn	brown	KALRN
Unc5c	blue		Rnf150	brown	RNF150
Usp54	blue		Gramd1b	brown	GRAMD1B
Vmp1	blue		Nrg2	brown	NRG2
Wipf1	blue		Arhgap10	brown	ARHGAP10
Wnk1	blue		Nckap1	brown	NCKAP1
Wscd1	blue		Agbl4	brown	AGBL4
Ypel2	blue		Med12l	brown	MED12L
Ywhaq	blue		Atp2b1	brown	ATP2B1
Zdhhc14	blue		Sptbn4	brown	SPTBN4
Zdhhc20	blue		Ptprn2	brown	PTPRN2
Zeb2	blue		Gucy1a2	brown	GUCY1A2
Zfp536	blue		Cers6	brown	CERS6
Abca1	brown		Magi3	brown	MAGI3
Acot11	brown		Lrrfip1	brown	LRRFIP1
Acsbg1	brown		Rbms1	brown	RBMS1
Acsl3	brown		Ksr2	brown	KSR2
Acss1	brown		Grm8	brown	GRM8
Adhfe1	brown		Elmod1	brown	ELMOD1
Adrbk2	brown		Tenm4	brown	TENM4
Aldh1l1	brown		Cpe	brown	CPE
Apoe	brown		Pitpnc1	brown	PITPNC1
Appl2	brown		Kctd16	brown	KCTD16
Aqp4	brown		Osbpl6	brown	OSBPL6
Arhgap5	brown		Srgap2	brown	SRGAP2
Arhgef19	brown		Nos1ap	brown	NOS1AP
Arhgef26	brown		Slc25a12	brown	SLC25A12
Arhgef4	brown		Stxbp5l	brown	STXBP5L
Asrgl1	brown		Rapgef4	brown	RAPGEF4
Atp13a4	brown		Arhgap32	brown	ARHGAP32
Atp1a2	brown		Atrnl1	brown	ATRNL1
Atp1b2	brown		Cit	brown	CIT
Bcan	brown		Zfp804a	brown	ZNF804A
Bmpr1b	brown		Wdr17	brown	WDR17
Cables1	brown		Nr3c2	brown	NR3C2
Camk2g	brown		Adam23	brown	ADAM23
Cbs	brown		Car10	brown	CA10
Ccdc141	brown		Plxna4	brown	PLXNA4
Ccdc190	brown		Scn1a	brown	SCN1A
Celrr	brown		Upp2	brown	UPP2
Clu	brown		Sorbs2	brown	SORBS2
Clybl	brown		Cntn5	brown	CNTN5
Cml3	brown		Prkag2	brown	PRKAG2
Cpe	brown		Gsk3b	brown	GSK3B
Cpq	brown		Bcl2l13	grey	BCL2L13
Cspg5	brown		Xpo4	grey	XPO4
Cst3	brown		Csnk2a1	grey	CSNK2A1
Ctnnd2	brown		Zmym5	grey	ZMYM5
Dbx2	brown		Usp16	grey	USP16
Ddah1	brown		Rnf6	grey	RNF6
Ddhd1	brown		Lats2	grey	LATS2
Dock1	brown		Pspc1	grey	PSPC1
Dpf3	brown		Grik1	grey	GRIK1
Dtna	brown		Ift88	grey	IFT88
Ednrb	brown		Nupl1	grey	NUP58
Egfr	brown		Atp6v1e1	grey	ATP6V1E1
Emx2os	brown		Nbea	grey	NBEA
Epas1	brown		Mical3	grey	MICAL3
Eps15	brown		Wasf3	grey	WASF3
Eps8	brown		Nrip1	grey	NRIP1
Etnppl	brown		Cecr2	grey	CECR2
Etv4	brown		Usp12	grey	USP12
Eva1a	brown		D16Ertd472e	grey	C21orf91
F3	brown		Mtus2	grey	MTUS2
Fads2	brown		Cdk8	grey	CDK8
Fam20a	brown		Micu2	grey	MICU2
Farp1	brown		Atp8a2	grey	ATP8A2
Fgd6	brown		N4bp2l2	grey	N4BP2L2
Fgfr3	brown		Ltn1	grey	LTN1
Frmpd1	brown		Usp25	grey	USP25
Gabrb1	brown		Spata13	grey	SPATA13
Gja1	brown		Mphosph8	grey	MPHOSPH8
Gjb6	brown		B3glct	grey	B3GLCT
Gldc	brown		Dgcr8	grey	DGCR8
Gli2	brown		N4bp2l1	grey	N4BP2L1
Gli3	brown		Hmgb1	grey	HMGB1
Glis3	brown		Zmym2	grey	ZMYM2
Glud1	brown		Ubl3	grey	UBL3
Glul	brown		Pds5b	grey	PDS5B
Gm10561	brown		Stard13	grey	STARD13
Gm11266	brown		Pan3	grey	PAN3
Gm12239	brown		Mtmr6	grey	MTMR6
Gm14964	brown		Dclk1	grey	DCLK1
Gm26843	brown		Ncam2	grey	NCAM2
Gm3764	brown		Hsph1	grey	HSPH1
Gm973	brown		Crbn	grey	CRBN
Gpc5	brown		Smox	grey	SMOX
Gpr37l1	brown		Pfkp	grey	PFKP
Gramd3	brown		Nf2	grey	NF2
Grin2c	brown		Lmf1	grey	LMF1
Hdac8	brown		Setd4	grey	SETD4
Hepacam	brown		Paxbp1	grey	PAXBP1
Hes5	brown		Pibf1	grey	PIBF1
Hif3a	brown		Ap1b1	grey	AP1B1
Htra1	brown		Rcl1	grey	RCL1
Igsf8	brown		Nprl3	grey	NPRL3
Irak2	brown		Ascc2	grey	ASCC2
Itga6	brown		Akap11	grey	AKAP11
Itih3	brown		Bcr	grey	BCR
Itpr2	brown		Prpf4b	grey	PRPF4B
Kank1	brown		Smarcb1	grey	SMARCB1
Lama2	brown		Psmd13	grey	PSMD13
Lgi4	brown		Ptpra	grey	PTPRA
Lix1	brown		Zdhhc21	grey	ZDHHC21
Lpp	brown		Wdr37	grey	WDR37
Lrig1	brown		Tango2	grey	TANGO2
Lrp4	brown		Ube2i	grey	UBE2I
Lsamp	brown		Itm2b	grey	ITM2B
Luzp2	brown		Pdgfa	grey	PDGFA
Macf1	brown		Gna12	grey	GNA12
Maml2	brown		Bsg	grey	BSG
Mertk	brown		Med15	grey	MED15
Mfge8	brown		Cab39l	grey	CAB39L
Mmd2	brown		Sec61a2	grey	SEC61A2
Msi2	brown		Hcn2	grey	HCN2
Mtss1l	brown		Riok1	grey	RIOK1
Nckap5	brown		Brwd1	grey	BRWD1
Ndrg2	brown		Fars2	grey	FARS2
Nfia	brown		Ccdc117	grey	CCDC117
Nhsl1	brown		Kdm4c	grey	KDM4C
Nim1k	brown		Rbm26	grey	RBM26
Notch1	brown		Fam234a	grey	FAM234A
Npas3	brown		Sucla2	grey	SUCLA2
Nrxn1	brown		Wdfy2	grey	WDFY2
Ntm	brown		Slx4ip	grey	SLX4IP
Ntsr2	brown		Synj1	grey	SYNJ1
Nwd1	brown		Scaf4	grey	SCAF4
Nxn	brown		Son	grey	SON
Palld	brown		Rb1	grey	RB1
Paqr8	brown		Prkcq	grey	PRKCQ
Pard3b	brown		Tbl1x	grey	TBL1X
Pbx1	brown		Dyrk1a	grey	DYRK1A
Pbxip1	brown		Zmynd11	grey	ZMYND11
Pdgfrb	brown		Fbxl3	grey	FBXL3
Pdlim5	brown		Gdi2	grey	GDI2
Pdzph1	brown		Vps16	grey	VPS16
Phka1	brown		Crkl	grey	CRKL
Phkg1	brown		Dstn	grey	DSTN
Pitpnc1	brown		Smarca2	grey	SMARCA2
Pla2g7	brown		Ppil2	grey	PPIL2
Plcd4	brown		Ewsr1	grey	EWSR1
Plce1	brown		Sox8	grey	SOX8
Plpp3	brown		Slc35b3	grey	SLC35B3
Ppara	brown		Rassf2	grey	RASSF2
Prdm16	brown		Cdc37l1	grey	CDC37L1
Prdx6	brown		Jak2	grey	JAK2
Prex2	brown		Mpdz	grey	MPDZ
Prrx1	brown		Cabin1	grey	CABIN1
Psd2	brown		Abcg1	grey	ABCG1
Ptch1	brown		Nudt5	grey	NUDT5
Ptprz1	brown		Clcn4	grey	CLCN4
Pygb	brown		Slc23a2	grey	SLC23A2
Rapgef3	brown		H13	grey	HM13
Rftn2	brown		Atrn	grey	ATRN
Rfx4	brown		Naa20	grey	NAA20
Rgma	brown		Stam	grey	STAM
Rgs20	brown		Exoc2	grey	EXOC2
Rora	brown		Cst3	grey	CST3
Rorb	brown		Nfib	grey	NFIB
S1pr1	brown		4930402H24Rik	grey	C20orf194
Sash1	brown		Ak3	grey	AK3
Sat1	brown		Supt20	grey	SUPT20H
Sfxn5	brown		Pola1	grey	POLA1
Sh3pxd2b	brown		Comt	grey	COMT
Slc1a2	brown		Zc3h13	grey	ZC3H13
Slc1a3	brown		Snx5	grey	SNX5
Slc27a1	brown		Rgcc	grey	RGCC
Slc38a3	brown		Pigq	grey	PIGQ
Slc39a12	brown		Nkx2-2	grey	NKX2-2
Slc6a11	brown		Snrnp48	grey	SNRNP48
Slc7a10	brown		Vldlr	grey	VLDLR
Slc7a11	brown		Tdrd3	grey	TDRD3
Slc7a2	brown		Fam107b	grey	FAM107B
Slco1c1	brown		Bcl2l1	grey	BCL2L1
Smo	brown		Acss1	grey	ACSS1
Son	brown		Lcp1	grey	LCP1
Sox6	brown		Napb	grey	NAPB
Sparcl1	brown		Kpna3	grey	KPNA3
St3gal4	brown		Dtd1	grey	DTD1
Ston2	brown		Nmt2	grey	NMT2
Tcf7l1	brown		Wbp4	grey	WBP4
Tcf7l2	brown		Klhl22	grey	KLHL22
Tnfaip8	brown		Gart	grey	GART
Tprkb	brown		Tmem259	grey	TMEM259
Trpm3	brown		Pcsk2	grey	PCSK2
Trps1	brown		Nup153	grey	NUP153
Tspan7	brown		Itsn1	grey	ITSN1
Wdr17	brown		Prkar1b	grey	PRKAR1B
Wwtr1	brown		Gtpbp4	grey	GTPBP4
Zbtb20	brown		Snap25	grey	SNAP25
Zeb1	brown		Ptdss2	grey	PTDSS2
Zfp36l1	brown		Cdadc1	grey	CDADC1
Gene	color		Xrn2	grey	XRN2
0610040J01Rik	green		Rab40c	grey	RAB40C
8030442B05Rik	green		Naa16	grey	NAA16
A830008E24Rik	green		Optn	grey	OPTN
Abca9	green		Luc7l	grey	LUC7L
Abi3	green		Rrbp1	grey	RRBP1
Adap2	green		Kif3b	grey	KIF3B
Adap2os	green		Rsu1	grey	RSU1
Anxa3	green		Lztr1	grey	LZTR1
Apbb1ip	green		Ssr1	grey	SSR1
Arhgap30	green		Kif13a	grey	KIF13A
Asb2	green		Uhrf2	grey	UHRF2
Bank1	green		Cap2	grey	CAP2
Bin2	green		Sec23b	grey	SEC23B
Blnk	green		Axin1	grey	AXIN1
Btk	green		Dnajc15	grey	DNAJC15
C1qa	green		Rcan1	grey	RCAN1
C1qb	green		Sugt1	grey	SUGT1
Capn3	green		Taf3	grey	TAF3
Casp8	green		Haghl	grey	HAGHL
Ccnd3	green		Syap1	grey	SYAP1
Ccr5	green		Dip2c	grey	DIP2C
Cd84	green		Rfx3	grey	RFX3
Cd86	green		Tmx4	grey	TMX4
Cdh23	green		Phka2	grey	PHKA2
Cfh	green		Fbxo25	grey	FBXO25
Cflar	green		Lmo7	grey	LMO7
Cmtm7	green		Arhgef10	grey	ARHGEF10
Col27a1	green		Mad1l1	grey	MAD1L1
Csf1r	green		Snapc3	grey	SNAPC3
Csf3r	green		Sh3kbp1	grey	SH3KBP1
Ctss	green		Frmpd4	grey	FRMPD4
Cx3cr1	green		Morc3	grey	MORC3
Cyth4	green		Cdyl	grey	CDYL
Dapp1	green		Gfod1	grey	GFOD1
Dock2	green		Btbd3	grey	BTBD3
Dock8	green		Cox19	grey	COX19
Elf4	green		9930021J03Rik	grey	KIAA2026
Entpd1	green		Pank2	grey	PANK2
Epb41l2	green		Pitpnb	grey	PITPNB
Fcrls	green		Cntln	grey	CNTLN
Fermt3	green		Fam171a1	grey	FAM171A1
Fgd2	green		Gpx4	grey	GPX4
Fli1	green		Tubb2a	grey	TUBB2A
Fmnl3	green		Sms	grey	SMS
Fyb	green		Aco1	grey	ACO1
Gm2245	green		Sumf1	grey	SUMF1
Gm27201	green		Ift74	grey	IFT74
Gna15	green		Vps36	grey	VPS36
Hexb	green		Rcbtb1	grey	RCBTB1
Hk2	green		Usp6nl	grey	USP6NL
Hmha1	green		Prrg1	grey	PRRG1
Ikzf1	green		Ermp1	grey	ERMP1
Il10ra	green		Kiz	grey	KIZ
Il6ra	green		Pcyt1b	grey	PCYT1B
Inpp5d	green		Cdc123	grey	CDC123
Itgb5	green		Fndc3a	grey	FNDC3A
Lair1	green		Hacd1	grey	HACD1
Lcp2	green		Hspa14	grey	HSPA14
Lgmn	green		Ranbp9	grey	RANBP9
Lpcat2	green		Dnaja1	grey	DNAJA1
Lrrk1	green		Slc22a23	grey	SLC22A23
Ly86	green		Psip1	grey	PSIP1
Lyn	green		Kctd4	grey	KCTD4
Mir142hg	green		Atxn1	grey	ATXN1
Myo1f	green		Plaa	grey	PLAA
Ncf1	green		Foxo1	grey	FOXO1
Nckap1l	green		Cdkl5	grey	CDKL5
P2ry6	green		Zdhhc8	grey	ZDHHC8
Pag1	green		Ralgapa2	grey	RALGAPA2
Pde3b	green		Ctps2	grey	CTPS2
Pik3ap1	green		Agpat5	grey	AGPAT5
Pik3r5	green		Cog3	grey	COG3
Plcg2	green		Phrf1	grey	PHRF1
Ptgs1	green		Zfx	grey	ZFX
Ptprc	green		Kif16b	grey	KIF16B
Rbm47	green		Ints6	grey	INTS6
Rcsd1	green		Ndfip2	grey	NDFIP2
Rgs10	green		Tmsb4x	grey	TMSB4X
Rhoh	green		Dtnbp1	grey	DTNBP1
Rin3	green		Znrf3	grey	ZNRF3
Rreb1	green		Nipsnap1	grey	NIPSNAP1
Runx1	green		Camk1d	grey	CAMK1D
Selplg	green		Lingo2	grey	LINGO2
Siglech	green		Focad	grey	FOCAD
Slc2a5	green		Elf1	grey	ELF1
Slc7a7	green		Pcdh17	grey	PCDH17
Slco2b1	green		Abhd12	grey	ABHD12
Sparc	green		Dennd4c	grey	DENND4C
Spi1	green		Ric1	grey	RIC1
Srgap2	green		Lrrn1	grey	LRRN1
Stab1	green		Il1rapl1	grey	IL1RAPL1
Susd3	green		Mbtps2	grey	MBTPS2
Syk	green		Vwa8	grey	VWA8
Tbxas1	green		Foxk1	grey	FOXK1
Tg	green		Mospd2	grey	MOSPD2
Tgfb1	green		Snx8	grey	SNX8
Tgfbr1	green		Dach1	grey	DACH1
Tgfbr2	green		Olig1	grey	OLIG1
Unc93b1	green		Tm9sf4	grey	TM9SF4
Vav1	green		Rab11fip3	grey	RAB11FIP3
Vsir	green		Mycbp2	grey	MYCBP2
Wdfy4	green		Cds2	grey	CDS2
Zfhx3	green		Asxl1	grey	ASXL1
Zfp710	green		Mllt3	grey	MLLT3
March1	grey		Tpt1	grey	TPT1
March2	grey		Smim13	grey	SMIM13
March3	grey		Syndig1	grey	SYNDIG1
March4	grey		Sun1	grey	SUN1
March6	grey		Pygb	grey	PYGB
March7	grey		Itpa	grey	ITPA
March8	grey		Rbbp7	grey	RBBP7
March11	grey		Cirbp	grey	CIRBP
Sept2	grey		Ttc3	grey	TTC3
Sept3	grey		Ofd1	grey	OFD1
Sept6	grey		Caap1	grey	CAAP1
Sept8	grey		Shroom2	grey	SHROOM2
0610010F05Rik	grey		Pdk3	grey	PDK3
0610043K17Rik	grey		Prpf18	grey	PRPF18
1110004F10Rik	grey		Pum3	grey	PUM3
1110008L16Rik	grey		Itpr1	grey	ITPR1
1110017D15Rik	grey		Tasp1	grey	TASP1
1110019D14Rik	grey		Pi4ka	grey	PI4KA
1110037F02Rik	grey		Kank1	grey	KANK1
1110046J04Rik	grey		Trim13	grey	TRIM13
1110051M20Rik	grey		Hlcs	grey	HLCS
1110059E24Rik	grey		Adap1	grey	ADAP1
1500009L16Rik	grey		Hps4	grey	HPS4
1500035N22Rik	grey		Spg20	grey	SPART
1600010M07Rik	grey		Jarid2	grey	JARID2
1600020E01Rik	grey		Esf1	grey	ESF1
1700003F12Rik	grey		Upf2	grey	UPF2
1700011I03Rik	grey		Rnf24	grey	RNF24
1700017B05Rik	grey		Gmds	grey	GMDS
1700019D03Rik	grey		Gtf2f2	grey	GTF2F2
1700024B18Rik	grey		Sgsm1	grey	SGSM1
1700025G04Rik	grey		Mapk1	grey	MAPK1
1700030F04Rik	grey		Dzank1	grey	DZANK1
1700042O10Rik	grey		Ddrgk1	grey	DDRGK1
1700080N15Rik	grey		Proser1	grey	PROSER1
1700084C06Rik	grey		Larp4b	grey	LARP4B
1700109K24Rik	grey		Reps2	grey	REPS2
1700111E14Rik	grey		Mcph1	grey	MCPH1
1700112E06Rik	grey		Txlng	grey	TXLNG
1700126G02Rik	grey		Tbc1d4	grey	TBC1D4
1810013L24Rik	grey		Olig2	grey	OLIG2
1810022K09Rik	grey		Phactr1	grey	PHACTR1
1810034E14Rik	grey		Mtmr3	grey	MTMR3
1810041L15Rik	grey		Exoc3	grey	EXOC3
1810062O18Rik	grey		Ankmy2	grey	ANKMY2
2010111I01Rik	grey		Slc6a1	grey	SLC6A1
2210016L21Rik	grey		Khsrp	grey	KHSRP
2210408I21Rik	grey		Itsn2	grey	ITSN2
2310035C23Rik	grey		Rusc2	grey	RUSC2
2310040G07Rik	grey		Ptprm	grey	PTPRM
2410089E03Rik	grey		Carnmt1	grey	CARNMT1
2510009E07Rik	grey		Nfe2l3	grey	NFE2L3
2610008E11Rik	grey		Laptm4a	grey	LAPTM4A
2610035D17Rik	grey		Adcy9	grey	ADCY9
2610037D02Rik	grey		Elp2	grey	ELP2
2610507B11Rik	grey		Rtcb	grey	RTCB
2700029M09Rik	grey		Ldlrad4	grey	LDLRAD4
2700049A03Rik	grey		Slc4a1ap	grey	SLC4A1AP
2700069I18Rik	grey		Pknox1	grey	PKNOX1
2700097O09Rik	grey		Snx13	grey	SNX13
2810004N23Rik	grey		Cyfip1	grey	CYFIP1
2810403A07Rik	grey		Oaz1	grey	OAZ1
2810474O19Rik	grey		Ubqln1	grey	UBQLN1
2900011O08Rik	grey		Prkcz	grey	PRKCZ
2900026A02Rik	grey		Atat1	grey	ATAT1
3110021N24Rik	grey		Syp	grey	SYP
3110035E14Rik	grey		Cep192	grey	CEP192
3110056K07Rik	grey		Dync1li1	grey	DYNC1LI1
3110082I17Rik	grey		Gkap1	grey	GKAP1
3300002A11Rik	grey		Dennd5a	grey	DENND5A
3632451O06Rik	grey		Abca3	grey	ABCA3
3830406C13Rik	grey		Gabbr1	grey	GABBR1
4430402I18Rik	grey		Gpr180	grey	GPR180
4732440D04Rik	grey		Eif2ak4	grey	EIF2AK4
4732471J01Rik	grey		Kdm5a	grey	KDM5A
4833420G17Rik	grey		Dnmt3a	grey	DNMT3A
4833422C13Rik	grey		Tle2	grey	TLE2
4921511C10Rik	grey		Atp11a	grey	ATP11A
4930402H24Rik	grey		Dhx15	grey	DHX15
4930444A19Rik	grey		Araf	grey	ARAF
4930445B16Rik	grey		Sub1	grey	SUB1
4930447C04Rik	grey		Ttc5	grey	TTC5
4930467D21Rik	grey		Nipbl	grey	NIPBL
4930473D10Rik	grey		Mettl16	grey	METTL16
4930509J09Rik	grey		Dlc1	grey	DLC1
4930527B05Rik	grey		Clcn5	grey	CLCN5
4930544I03Rik	grey		Limk2	grey	LIMK2
4930545L23Rik	grey		Lsm7	grey	LSM7
4930555F03Rik	grey		Reep3	grey	REEP3
4930578C19Rik	grey		Ap3d1	grey	AP3D1
4930590L20Rik	grey		Ablim2	grey	ABLIM2
4930599N23Rik	grey		Hmgxb4	grey	HMGXB4
4931406C07Rik	grey		Malsu1	grey	MALSU1
4931406P16Rik	grey		Sorcs2	grey	SORCS2
4931422A03Rik	grey		Inpp5k	grey	INPP5K
4932438A13Rik	grey		Atp6ap2	grey	ATP6AP2
4932443L11Rik	grey		Smyd4	grey	SMYD4
4933406I18Rik	grey		Crk	grey	CRK
4933411O13Rik	grey		Zhx3	grey	ZHX3
4933413L06Rik	grey		Zc3h7b	grey	ZC3H7B
4933427D14Rik	grey		Pcbp3	grey	PCBP3
4933434E20Rik	grey		Uqcc1	grey	UQCC1
5031415H12Rik	grey		Tjp1	grey	TJP1
5031425E22Rik	grey		Ngly1	grey	NGLY1
5330434G04Rik	grey		Phf14	grey	PHF14
5330439K02Rik	grey		Mllt10	grey	MLLT10
5530401A14Rik	grey		Ywhah	grey	YWHAH
5730559C18Rik	grey		Letm1	grey	LETM1
6030407O03Rik	grey		Prmt2	grey	PRMT2
6030443J06Rik	grey		Kif3c	grey	KIF3C
6030458C11Rik	grey		Hdac9	grey	HDAC9
6330403A02Rik	grey		Mcf2l	grey	MCF2L
6330403K07Rik	grey		Mib1	grey	MIB1
6530409C15Rik	grey		Actb	grey	ACTB
8030462N17Rik	grey		Parp2	grey	PARP2
9030624J02Rik	grey		Nfs1	grey	NFS1
9130011E15Rik	grey		Impact	grey	IMPACT
9330111N05Rik	grey		Cers4	grey	CERS4
9330158H04Rik	grey		Rpa1	grey	RPA1
9330159F19Rik	grey		Mcm3ap	grey	MCM3AP
9330182L06Rik	grey		Ampd3	grey	AMPD3
9430041J12Rik	grey		Ggt7	grey	GGT7
9530026P05Rik	grey		Acss2	grey	ACSS2
9530036O11Rik	grey		Ube2g1	grey	UBE2G1
9530052E02Rik	grey		Epb41l3	grey	EPB41L3
9830147E19Rik	grey		Gnb1	grey	GNB1
9930021J03Rik	grey		Htt	grey	HTT
A230006K03Rik	grey		Ncoa1	grey	NCOA1
A230009B12Rik	grey		Dcaf10	grey	DCAF10
A230046K03Rik	grey		Dnaja3	grey	DNAJA3
A230050P20Rik	grey		Tle1	grey	TLE1
A330008L17Rik	grey		Ap2a2	grey	AP2A2
A330017A19Rik	grey		Rnf138	grey	RNF138
A330033J07Rik	grey		Ostf1	grey	OSTF1
A330050F15Rik	grey		Ankrd12	grey	ANKRD12
A330093E20Rik	grey		Tbc1d5	grey	TBC1D5
A330102I10Rik	grey		Ccdc174	grey	CCDC174
A4galt	grey		Cdk11b	grey	CDK11B
A730017C20Rik	grey		Rbm39	grey	RBM39
A830018L16Rik	grey		Pacsin2	grey	PACSIN2
A830036E02Rik	grey		Ccnl2	grey	CCNL2
A830080D01Rik	grey		Sdf4	grey	SDF4
A930009A15Rik	grey		Napg	grey	NAPG
A930015D03Rik	grey		Nrbp1	grey	NRBP1
Aacs	grey		Xpnpep3	grey	XPNPEP3
Aagab	grey		Fbxo7	grey	FBXO7
Aak1	grey		Sh3gl1	grey	SH3GL1
Aars	grey		Serinc3	grey	SERINC3
Aatf	grey		Mob2	grey	MOB2
Abca3	grey		Smc6	grey	SMC6
Abca4	grey		Rbm10	grey	RBM10
Abca5	grey		Meis2	grey	MEIS2
Abca7	grey		Slc6a6	grey	SLC6A6
Abca8b	grey		Sema4d	grey	SEMA4D
Abcb10	grey		Insr	grey	INSR
Abcb1a	grey		Spin1	grey	SPIN1
Abcb7	grey		Ccz1	grey	CCZ1
Abcb9	grey		Arhgef40	grey	ARHGEF40
Abcc1	grey		Pgap2	grey	PGAP2
Abcc3	grey		Ankrd28	grey	ANKRD28
Abcc4	grey		Txn2	grey	TXN2
Abcc5	grey		Itgb8	grey	ITGB8
Abcc8	grey		Micall1	grey	MICALL1
Abcc9	grey		Spred1	grey	SPRED1
Abcd2	grey		Rnf144a	grey	RNF144A
Abcd3	grey		Rbx1	grey	RBX1
Abcd4	grey		Smc5	grey	SMC5
Abce1	grey		Atg7	grey	ATG7
Abcf1	grey		Itgb1	grey	ITGB1
Abcg1	grey		Ptpn2	grey	PTPN2
Abcg2	grey		Ppm1g	grey	PPM1G
Abcg4	grey		Srgap3	grey	SRGAP3
Abhd12	grey		Lcorl	grey	LCORL
Abhd14b	grey		Mapre2	grey	MAPRE2
Abhd15	grey		Pcnt	grey	PCNT
Abhd16a	grey		Nalcn	grey	NALCN
Abhd18	grey		Tubgcp3	grey	TUBGCP3
Abhd2	grey		Ubap1	grey	UBAP1
Abhd3	grey		Stmn4	grey	STMN4
Abhd6	grey		Ralbp1	grey	RALBP1
Abi1	grey		Atp6v1b2	grey	ATP6V1B2
Abi2	grey		Mrs2	grey	MRS2
Abi3bp	grey		Ints9	grey	INTS9
Abl1	grey		Pum2	grey	PUM2
Abl2	grey		Ubxn2a	grey	UBXN2A
Ablim3	grey		Edem1	grey	EDEM1
Abr	grey		Galnt1	grey	GALNT1
Abtb2	grey		Dip2a	grey	DIP2A
Acadsb	grey		2310011J03Rik	grey	C19orf25
Acap2	grey		Zc3h12b	grey	ZC3H12B
Acap3	grey		Ssu72	grey	SSU72
Acat1	grey		Reck	grey	RECK
Acbd3	grey		1110059E24Rik	grey	C9orf85
Acbd5	grey		Emc3	grey	EMC3
Acbd6	grey		Chmp7	grey	CHMP7
Acer2	grey		Mink1	grey	MINK1
Acer3	grey		Rprd1b	grey	RPRD1B
Ache	grey		Cdkal1	grey	CDKAL1
Acin1	grey		Fscn1	grey	FSCN1
Ackr3	grey		Drg1	grey	DRG1
Acly	grey		Anapc4	grey	ANAPC4
Aco2	grey		Nt5c3	grey	NT5C3A
Acot7	grey		Ankrd10	grey	ANKRD10
Acox1	grey		Dnttip1	grey	DNTTIP1
Acp1	grey		Aven	grey	AVEN
Acsl1	grey		Saraf	grey	SARAF
Acsl4	grey		Ctsb	grey	CTSB
Acsl6	grey		Gsr	grey	GSR
Acss2	grey		Rangap1	grey	RANGAP1
Acss3	grey		Ddx39b	grey	DDX39B
Actb	grey		Ube2d1	grey	UBE2D1
Actl6b	grey		Lamp1	grey	LAMP1
Actn4	grey		Eif4g2	grey	EIF4G2
Actr10	grey		Ccny	grey	CCNY
Actr1a	grey		Rp9	grey	RP9
Actr1b	grey		Gripap1	grey	GRIPAP1
Actr2	grey		Gnl3l	grey	GNL3L
Actr3	grey		Cdh10	grey	CDH10
Actr3b	grey		Unc13b	grey	UNC13B
Acvr1	grey		Bms1	grey	BMS1
Acvr2a	grey		Rnf38	grey	RNF38
Acvrl1	grey		Grhpr	grey	GRHPR
Acyp2	grey		Ints10	grey	INTS10
Adam10	grey		Ranbp3	grey	RANBP3
Adam11	grey		Avl9	grey	AVL9
Adam12	grey		Nr2c2	grey	NR2C2
Adam17	grey		Glod4	grey	GLOD4
Adam19	grey		Npc1	grey	NPC1
Adam22	grey		Rock1	grey	ROCK1
Adamts10	grey		Tm9sf2	grey	TM9SF2
Adamts12	grey		6030458C11Rik	grey	C5orf22
Adamts15	grey		Srr	grey	SRR
Adamts17	grey		Pdia6	grey	PDIA6
Adamts18	grey		Fdft1	grey	FDFT1
Adamts19	grey		Wac	grey	WAC
Adamts2	grey		Anks3	grey	ANKS3
Adamts6	grey		Pkig	grey	PKIG
Adamts9	grey		Rab5a	grey	RAB5A
Adamtsl1	grey		Map2k2	grey	MAP2K2
Adamtsl3	grey		Ralgapb	grey	RALGAPB
Adamtsl5	grey		Hnrnpk	grey	HNRNPK
Adap1	grey		Elmo2	grey	ELMO2
Adar	grey		Zcchc7	grey	ZCCHC7
Adarb1	grey		Sepsecs	grey	SEPSECS
Adarb2	grey		Xpo7	grey	XPO7
Adat1	grey		Gss	grey	GSS
Adck1	grey		Stx18	grey	STX18
Adck4	grey		Rnf141	grey	RNF141
Adcy1	grey		Sdha	grey	SDHA
Adcy10	grey		BC005537	grey	C6orf62
Adcy3	grey		Nfx1	grey	NFX1
Adcy6	grey		Prpf8	grey	PRPF8
Adcy7	grey		Epb41l1	grey	EPB41L1
Adcy8	grey		Rasa3	grey	RASA3
Adcy9	grey		Ube2e1	grey	UBE2E1
Adcyap1r1	grey		Riok3	grey	RIOK3
Add1	grey		Nedd8	grey	NEDD8
Add3	grey		Zbtb7a	grey	ZBTB7A
Adgra1	grey		Hibadh	grey	HIBADH
Adgra2	grey		Pafah1b1	grey	PAFAH1B1
Adgrb2	grey		Pitpna	grey	PITPNA
Adgrb3	grey		Thsd7a	grey	THSD7A
Adgrd1	grey		Osbp2	grey	OSBP2
Adgre1	grey		Elp3	grey	ELP3
Adgre5	grey		Aar2	grey	AAR2
Adgrf5	grey		Sh3bp5	grey	SH3BP5
Adgrl1	grey		Ankfy1	grey	ANKFY1
Adgrl3	grey		Dctn6	grey	DCTN6
Adgrl4	grey		Rnps1	grey	RNPS1
Adgrv1	grey		Ncbp3	grey	NCBP3
Adk	grey		Fam219a	grey	FAM219A
Adora1	grey		Agtpbp1	grey	AGTPBP1
Adra1a	grey		Ank	grey	ANKH
Adra1b	grey		Psd3	grey	PSD3
Adss	grey		Prrc2a	grey	PRRC2A
Aebp1	grey		Psma1	grey	PSMA1
Aebp2	grey		Fan1	grey	FAN1
Aes	grey		Mgrn1	grey	MGRN1
Afap1	grey		Efr3b	grey	EFR3B
Afap1l1	grey		Pdpk1	grey	PDPK1
Afap1l2	grey		Nsun2	grey	NSUN2
Aff1	grey		Oxct1	grey	OXCT1
Aff2	grey		Ppp2r2a	grey	PPP2R2A
Aff3	grey		Mief1	grey	MIEF1
Aff4	grey		Rala	grey	RALA
Afg3l2	grey		Tab1	grey	TAB1
Aftph	grey		Dnajc3	grey	DNAJC3
Agap2	grey		Ddr1	grey	DDR1
Agap3	grey		Thoc1	grey	THOC1
Agfg1	grey		Pard3	grey	PARD3
Agfg2	grey		Cul4a	grey	CUL4A
Agk	grey		Herc2	grey	HERC2
Agl	grey		Adcy3	grey	ADCY3
Agmo	grey		Jph4	grey	JPH4
Ago1	grey		Wdr1	grey	WDR1
Ago2	grey		Sgta	grey	SGTA
Ago3	grey		Acbd5	grey	ACBD5
Ago4	grey		Herpud2	grey	HERPUD2
Agpat3	grey		Afap1	grey	AFAP1
Agpat4	grey		Hadha	grey	HADHA
Agpat5	grey		Pcm1	grey	PCM1
Agps	grey		Arid5b	grey	ARID5B
Agrn	grey		Ift52	grey	IFT52
Agrp	grey		Spire1	grey	SPIRE1
Agtpbp1	grey		Rad52	grey	RAD52
Ahctf1	grey		Eef2	grey	EEF2
Ahcyl1	grey		Yes1	grey	YES1
Ahcyl2	grey		Ppp3cc	grey	PPP3CC
Ahdc1	grey		Hagh	grey	HAGH
Ahi1	grey		Naa35	grey	NAA35
Ahnak	grey		Pdxk	grey	PDXK
Ahr	grey		Tmem106b	grey	TMEM106B
Ahsa2	grey		Hmox2	grey	HMOX2
AI314180	grey		Bmp1	grey	BMP1
AI846148	grey		Trappc12	grey	TRAPPC12
AI854517	grey		Auh	grey	AUH
Aida	grey		Myl12b	grey	MYL12B
Aifm1	grey		Crebbp	grey	CREBBP
Aifm3	grey		Psat1	grey	PSAT1
Aig1	grey		Csnk1e	grey	CSNK1E
Aim2	grey		Dcaf12	grey	DCAF12
Airn	grey		St13	grey	ST13
Ak3	grey		Zfp397	grey	ZNF397
Akap10	grey		Myh9	grey	MYH9
Akap11	grey		Add1	grey	ADD1
Akap12	grey		Pde1c	grey	PDE1C
Akap13	grey		Sppl2b	grey	SPPL2B
Akap17b	grey		Usp11	grey	USP11
Akap6	grey		Slc1a3	grey	SLC1A3
Akap7	grey		Brk1	grey	BRK1
Akap8	grey		Tubb5	grey	TUBB
Akap8l	grey		Parg	grey	PARG
Akap9	grey		Eif2b4	grey	EIF2B4
Akr1a1	grey		Mapk8ip3	grey	MAPK8IP3
Akr1b3	grey		Lrpap1	grey	LRPAP1
Akt3	grey		Dvl1	grey	DVL1
Aktip	grey		Pigt	grey	PIGT
Alas1	grey		Ubap2	grey	UBAP2
Aldh1a1	grey		Nadk	grey	NADK
Aldh1a2	grey		Klf9	grey	KLF9
Aldh7a1	grey		Ndrg3	grey	NDRG3
Aldoa	grey		Timm23	grey	TIMM23
Alg13	grey		Rab2b	grey	RAB2B
Alg9	grey		Kdm5c	grey	KDM5C
Alk	grey		Dock9	grey	DOCK9
Alkbh1	grey		Ppp2r2c	grey	PPP2R2C
Alkbh8	grey		Agpat3	grey	AGPAT3
Alms1	grey		Clpp	grey	CLPP
Als2	grey		Pcgf3	grey	PCGF3
Ambra1	grey		Wipi2	grey	WIPI2
Amd1	grey		Stim1	grey	STIM1
Amfr	grey		Sorbs3	grey	SORBS3
Ammecr1	grey		Usp9x	grey	USP9X
Ammecr1l	grey		Scrn1	grey	SCRN1
Amn1	grey		D5Ertd579e	grey	KIAA0232
Ampd3	grey		Afg3l2	grey	AFG3L2
Amph	grey		Eif2ak1	grey	EIF2AK1
Amy1	grey		Rpn2	grey	RPN2
Amz1	grey		Gpc5	grey	GPC5
Anapc1	grey		Pmm2	grey	PMM2
Anapc10	grey		Rab10	grey	RAB10
Anapc16	grey		Tax1bp1	grey	TAX1BP1
Anapc4	grey		Asah1	grey	ASAH1
Anapc5	grey		Kcnh8	grey	KCNH8
Angel2	grey		Nipa2	grey	NIPA2
Angpt1	grey		Trappc10	grey	TRAPPC10
Angpt2	grey		Sema5a	grey	SEMA5A
Angptl2	grey		Atxn10	grey	ATXN10
Ank1	grey		Ywhae	grey	YWHAE
Ankfn1	grey		Ndufa4	grey	NDUFA4
Ankfy1	grey		Ddx3x	grey	DDX3X
Ankhd1	grey		Hnrnpa2b1	grey	HNRNPA2B1
Ankib1	grey		Epc1	grey	EPC1
Ankmy2	grey		Zcchc4	grey	ZCCHC4
Ankrd10	grey		Zfr	grey	ZFR
Ankrd11	grey		Ywhab	grey	YWHAB
Ankrd12	grey		Ptprs	grey	PTPRS
Ankrd13a	grey		Copb1	grey	COPB1
Ankrd13b	grey		Cnot7	grey	CNOT7
Ankrd13c	grey		Srsf6	grey	SRSF6
Ankrd17	grey		Dek	grey	DEK
Ankrd24	grey		Erlin2	grey	ERLIN2
Ankrd26	grey		Aco2	grey	ACO2
Ankrd27	grey		Bnip3l	grey	BNIP3L
Ankrd29	grey		Mapk8	grey	MAPK8
Ankrd40	grey		Slc22a17	grey	SLC22A17
Ankrd42	grey		Acin1	grey	ACIN1
Ankrd44	grey		Sfi1	grey	SFI1
Ankrd45	grey		Esco1	grey	ESCO1
Ankrd50	grey		Stk4	grey	STK4
Ankrd52	grey		Rbfox2	grey	RBFOX2
Ankrd55	grey		Pik3ip1	grey	PIK3IP1
Ankrd6	grey		Vps53	grey	VPS53
Anks1	grey		Arl8b	grey	ARL8B
Anks3	grey		Huwe1	grey	HUWE1
Ano1	grey		Plcg1	grey	PLCG1
Ano10	grey		Timm44	grey	TIMM44
Ano6	grey		Drosha	grey	DROSHA
Anp32a	grey		Acap3	grey	ACAP3
Antxr1	grey		Tln1	grey	TLN1
Anxa2	grey		Usp7	grey	USP7
Anxa6	grey		Desi1	grey	DESI1
Anxa7	grey		Cul2	grey	CUL2
Aox3	grey		Wrn	grey	WRN
Ap1ar	grey		Gtf2e2	grey	GTF2E2
Ap1b1	grey		Nsun6	grey	NSUN6
Ap1g1	grey		Wdr13	grey	WDR13
Ap1s1	grey		Maged1	grey	MAGED1
Ap2a1	grey		Fsd1	grey	FSD1
Ap2a2	grey		Kat2b	grey	KAT2B
Ap2b1	grey		Golph3	grey	GOLPH3
Ap3b1	grey		Apba1	grey	APBA1
Ap3b2	grey		Trim26	grey	TRIM26
Ap3d1	grey		Kdm4b	grey	KDM4B
Ap3m1	grey		Otud5	grey	OTUD5
Ap3s1	grey		Tnks	grey	TNKS
Ap3s2	grey		Dtna	grey	DTNA
Ap4e1	grey		Vps37a	grey	VPS37A
Ap4s1	grey		Ski	grey	SKI
Apaf1	grey		Mtmr14	grey	MTMR14
Apba1	grey		Mtmr10	grey	MTMR10
Apc	grey		Tox4	grey	TOX4
Apc2	grey		Top2b	grey	TOP2B
Apcdd1	grey		Hmbox1	grey	HMBOX1
Apex2	grey		Tmem175	grey	TMEM175
Aplp1	grey		Glyr1	grey	GLYR1
Aplp2	grey		Nadk2	grey	NADK2
Apobec4	grey		Fam126a	grey	FAM126A
Apoo	grey		Ppp2cb	grey	PPP2CB
Apopt1	grey		Extl3	grey	EXTL3
Appbp2	grey		Vapa	grey	VAPA
Appl1	grey		Sptlc1	grey	SPTLC1
Aqr	grey		Ice1	grey	ICE1
Ar	grey		Ctr9	grey	CTR9
Araf	grey		Stard3nl	grey	STARD3NL
Arap2	grey		Tubgcp5	grey	TUBGCP5
Arap3	grey		Pkd1	grey	PKD1
Arcn1	grey		Unkl	grey	UNKL
Arel1	grey		Hs1bp3	grey	HS1BP3
Arf3	grey		Vgll4	grey	VGLL4
Arf4	grey		Kif5b	grey	KIF5B
Arf5	grey		Iqsec1	grey	IQSEC1
Arfgap1	grey		Ube3a	grey	UBE3A
Arfgap2	grey		Tle4	grey	TLE4
Arfgap3	grey		Rorb	grey	RORB
Arfgef1	grey		Pnpla6	grey	PNPLA6
Arfgef2	grey		Rock2	grey	ROCK2
Arfgef3	grey		Trim35	grey	TRIM35
Arglu1	grey		Cenpp	grey	CENPP
Arhgap12	grey		Bzw2	grey	BZW2
Arhgap17	grey		Uba1	grey	UBA1
Arhgap18	grey		Oxa1l	grey	OXA1L
Arhgap21	grey		Mboat2	grey	MBOAT2
Arhgap22	grey		Dlg3	grey	DLG3
Arhgap24	grey		Capn7	grey	CAPN7
Arhgap25	grey		Stt3b	grey	STT3B
Arhgap26	grey		Rnf185	grey	RNF185
Arhgap28	grey		Nr1d2	grey	NR1D2
Arhgap29	grey		Carhsp1	grey	CARHSP1
Arhgap31	grey		Arhgef7	grey	ARHGEF7
Arhgap32	grey		Ccdc77	grey	CCDC77
Arhgap35	grey		Secisbp2	grey	SECISBP2
Arhgap39	grey		Sp4	grey	SP4
Arhgap42	grey		Evi5l	grey	EVI5L
Arhgap44	grey		Tmem184b	grey	TMEM184B
Arhgap6	grey		Ndrg2	grey	NDRG2
Arhgef1	grey		Acot7	grey	ACOT7
Arhgef10l	grey		Tbc1d14	grey	TBC1D14
Arhgef11	grey		Rab28	grey	RAB28
Arhgef12	grey		Ctnnbl1	grey	CTNNBL1
Arhgef15	grey		Bbs9	grey	BBS9
Arhgef17	grey		Cdip1	grey	CDIP1
Arhgef18	grey		Atraid	grey	ATRAID
Arhgef2	grey		Yme1l1	grey	YME1L1
Arhgef25	grey		Ehmt2	grey	EHMT2
Arhgef3	grey		Plin3	grey	PLIN3
Arhgef37	grey		Smchd1	grey	SMCHD1
Arhgef40	grey		Pias4	grey	PIAS4
Arhgef6	grey		Zfand5	grey	ZFAND5
Arhgef7	grey		Clta	grey	CLTA
Arid1a	grey		Tra2a	grey	TRA2A
Arid1b	grey		Ppp1cb	grey	PPP1CB
Arid2	grey		Otud7a	grey	OTUD7A
Arid4a	grey		Srebf2	grey	SREBF2
Arid4b	grey		Xrcc6	grey	XRCC6
Arid5b	grey		Taldo1	grey	TALDO1
Arih1	grey		Mapre3	grey	MAPRE3
Arih2	grey		Supt16	grey	SUPT16H
Arl3	grey		Tmem80	grey	TMEM80
Arl4a	grey		Ube2j2	grey	UBE2J2
Arl6ip5	grey		Scg5	grey	SCG5
Arl8a	grey		Trappc8	grey	TRAPPC8
Armc2	grey		Rnf4	grey	RNF4
Armc8	grey		Vcp	grey	VCP
Armc9	grey		Brix1	grey	BRIX1
Armcx1	grey		Fam120c	grey	FAM120C
Arnt	grey		Hdac11	grey	HDAC11
Arnt2	grey		Tef	grey	TEF
Arntl	grey		Mtpap	grey	MTPAP
Arpc1a	grey		Rab12	grey	RAB12
Arpc2	grey		Dnajc1	grey	DNAJC1
Arpc3	grey		Rac1	grey	RAC1
Arpp19	grey		Raf1	grey	RAF1
Arrb1	grey		Nbas	grey	NBAS
Arsb	grey		Far1	grey	FAR1
Art3	grey		Pigu	grey	PIGU
Arv1	grey		Cdc16	grey	CDC16
Arvcf	grey		Mios	grey	MIOS
Asah1	grey		Mxd4	grey	MXD4
Asap1	grey		Srrm2	grey	SRRM2
Asap2	grey		Adam17	grey	ADAM17
Asap3	grey		Ipo7	grey	IPO7
Asb13	grey		Elavl1	grey	ELAVL1
Asb3	grey		Prkg1	grey	PRKG1
Asb7	grey		Skap2	grey	SKAP2
Ascc2	grey		Zzef1	grey	ZZEF1
Ascc3	grey		Ppfibp2	grey	PPFIBP2
Ash1l	grey		Arhgap12	grey	ARHGAP12
Asic1	grey		Cpeb2	grey	CPEB2
Asic2	grey		Brsk2	grey	BRSK2
Asph	grey		Gabrg3	grey	GABRG3
Aspn	grey		Azi2	grey	AZI2
Ass1	grey		Edem2	grey	EDEM2
Astn1	grey		Ncoa5	grey	NCOA5
Astn2	grey		Arglu1	grey	ARGLU1
Asxl1	grey		Ppp1r10	grey	PPP1R10
Asxl2	grey		Rpl27a	grey	RPL27A
Asxl3	grey		Ube2r2	grey	UBE2R2
Atad1	grey		Nup98	grey	NUP98
Atad2b	grey		Tcf20	grey	TCF20
Atad3a	grey		Cmtm5	grey	CMTM5
Atat1	grey		Emc7	grey	EMC7
Atcay	grey		Cep78	grey	CEP78
Atf1	grey		Daglb	grey	DAGLB
Atf2	grey		Chd8	grey	CHD8
Atf4	grey		Pick1	grey	PICK1
Atf6	grey		Arntl	grey	ARNTL
Atf7ip	grey		Phf20	grey	PHF20
Atg10	grey		Stk24	grey	STK24
Atg16l1	grey		Bicd2	grey	BICD2
Atg16l2	grey		Tpp2	grey	TPP2
Atg2a	grey		Ubac2	grey	UBAC2
Atg2b	grey		Lonrf1	grey	LONRF1
Atg3	grey		Arhgap21	grey	ARHGAP21
Atg4b	grey		Rprd1a	grey	RPRD1A
Atg4c	grey		Zfp131	grey	ZNF131
Atg5	grey		Fam228b	grey	FAM228B
Atg7	grey		Hnrnpc	grey	HNRNPC
Atl1	grey		Nol4l	grey	NOL4L
Atl2	grey		Pgp	grey	PGP
Atl3	grey		Nfic	grey	NFIC
Atm	grey		Wdr43	grey	WDR43
Atp10a	grey		Chmp4b	grey	CHMP4B
Atp11a	grey		Klf13	grey	KLF13
Atp11b	grey		Unc5d	grey	UNC5D
Atp11c	grey		Smg6	grey	SMG6
Atp13a2	grey		Rap2a	grey	RAP2A
Atp13a3	grey		U2af1	grey	U2AF1
Atp13a5	grey		Lifr	grey	LIFR
Atp1a1	grey		Top1	grey	TOP1
Atp1a3	grey		Nol10	grey	NOL10
Atp1b1	grey		Abcf1	grey	ABCF1
Atp1b3	grey		Ube2e2	grey	UBE2E2
Atp2a2	grey		Zfyve28	grey	ZFYVE28
Atp2b3	grey		Rap1gap2	grey	RAP1GAP2
Atp2b4	grey		Syt9	grey	SYT9
Atp2c1	grey		Ryr3	grey	RYR3
Atp5a1	grey		Purg	grey	PURG
Atp5b	grey		Nipa1	grey	NIPA1
Atp5c1	grey		Pcsk1n	grey	PCSK1N
Atp5f1	grey		Ss18	grey	SS18
Atp5o	grey		Zfp143	grey	ZNF143
Atp6ap1	grey		Trpc4ap	grey	TRPC4AP
Atp6ap1l	grey		Fmn1	grey	FMN1
Atp6ap2	grey		Apbb1	grey	APBB1
Atp6v0a1	grey		Cbx7	grey	CBX7
Atp6v0a2	grey		Cdh12	grey	CDH12
Atp6v0b	grey		Uggt2	grey	UGGT2
Atp6v0d1	grey		Mrpl33	grey	MRPL33
Atp6v1a	grey		Prune2	grey	PRUNE2
Atp6v1b2	grey		Rab11b	grey	RAB11B
Atp6v1c1	grey		Usp47	grey	USP47
Atp6v1d	grey		Hadhb	grey	HADHB
Atp6v1e1	grey		Zfp365	grey	ZNF365
Atp6v1h	grey		Ubn1	grey	UBN1
Atp7a	grey		C1galt1	grey	C1GALT1
Atp8a2	grey		Izumo4	grey	IZUMO4
Atp8b1	grey		Hpcal1	grey	HPCAL1
Atp9a	grey		Zmynd8	grey	ZMYND8
Atp9b	grey		Dnajc21	grey	DNAJC21
Atpaf1	grey		Fbxl5	grey	FBXL5
Atpif1	grey		Pcif1	grey	PCIF1
Atr	grey		Fam193a	grey	FAM193A
Atraid	grey		Rps15	grey	RPS15
Atrn	grey		Eif2s2	grey	EIF2S2
Atrnl1	grey		Commd3	grey	COMMD3
Atrx	grey		Irak2	grey	IRAK2
Atxn10	grey		Sbf2	grey	SBF2
Atxn2	grey		Tnrc6b	grey	TNRC6B
Atxn2l	grey		Zfp266	grey	ZNF266
Atxn3	grey		Abat	grey	ABAT
Atxn7	grey		Manbal	grey	MANBAL
Atxn7l1	grey		Dph6	grey	DPH6
AU020206	grey		Sgms1	grey	SGMS1
AU040320	grey		Phyhipl	grey	PHYHIPL
Auh	grey		Jmjd1c	grey	JMJD1C
Auts2	grey		Kctd1	grey	KCTD1
Avl9	grey		Sgsm2	grey	SGSM2
AW549877	grey		Btbd10	grey	BTBD10
AW554918	grey		Arfgap3	grey	ARFGAP3
Axin1	grey		Nrg1	grey	NRG1
Axin2	grey		Dcp1b	grey	DCP1B
Axl	grey		Flywch1	grey	FLYWCH1
AY036118	grey		Trpv3	grey	TRPV3
Azin2	grey		Nmral1	grey	NMRAL1
B230323A14Rik	grey		Ddx1	grey	DDX1
B3galnt2	grey		Zfp426	grey	ZNF426
B3galt1	grey		Smc1a	grey	SMC1A
B3galt2	grey		Ccdc6	grey	CCDC6
B3galt5	grey		Kidins220	grey	KIDINS220
B3gat1	grey		Zdhhc2	grey	ZDHHC2
B3gat2	grey		Chd6	grey	CHD6
B3glct	grey		Tmco3	grey	TMCO3
B3gntl1	grey		Prr14l	grey	PRR14L
B4galt1	grey		Gng7	grey	GNG7
B4galt5	grey		Gal3st1	grey	GAL3ST1
B4galt6	grey		Rexo1	grey	REXO1
B630005N14Rik	grey		Snrpn	grey	SNRPN
B830012L14Rik	grey		Abi1	grey	ABI1
Babam1	grey		Zfp322a	grey	ZNF322
Bace1	grey		Tsen2	grey	TSEN2
Bach2	grey		Urgcp	grey	URGCP
Bahcc1	grey		Kdm6a	grey	KDM6A
Baiap2l1	grey		Rhob	grey	RHOB
Baiap3	grey		Mrfap1	grey	MRFAP1
Basp1	grey		Ddx17	grey	DDX17
Baz1b	grey		Cep250	grey	CEP250
Baz2a	grey		Safb2	grey	SAFB2
Bbip1	grey		Frmd3	grey	FRMD3
Bbof1	grey		Asap2	grey	ASAP2
Bbs4	grey		Tob2	grey	TOB2
Bbs5	grey		Gtpbp1	grey	GTPBP1
Bbs7	grey		Ldah	grey	LDAH
Bbs9	grey		Taf1b	grey	TAF1B
Bbx	grey		Ppp4r1	grey	PPP4R1
BC004004	grey		Lap3	grey	LAP3
BC005537	grey		Hnrnpm	grey	HNRNPM
BC005561	grey		Grk4	grey	GRK4
BC030336	grey		Tubb4a	grey	TUBB4A
BC030499	grey		Abhd17b	grey	ABHD17B
BC031181	grey		Mgat3	grey	MGAT3
BC052040	grey		Mical2	grey	MICAL2
Bcap29	grey		Rragb	grey	RRAGB
Bcar3	grey		Tada3	grey	TADA3
Bcas3	grey		Atad2b	grey	ATAD2B
Bcas3os1	grey		Zfp24	grey	ZNF24
Bcat1	grey		Rictor	grey	RICTOR
Bckdha	grey		Fam13c	grey	FAM13C
Bckdhb	grey		Dazap1	grey	DAZAP1
Bcl11a	grey		Iah1	grey	IAH1
Bcl2	grey		Crem	grey	CREM
Bcl2l13	grey		Cpsf3	grey	CPSF3
Bcl6	grey		Aqr	grey	AQR
Bcl7a	grey		Soga1	grey	SOGA1
Bcl7c	grey		Fbxl7	grey	FBXL7
Bcl9	grey		Tnrc18	grey	TNRC18
Bclaf1	grey		Ncoa6	grey	NCOA6
Bcor	grey		Ep300	grey	EP300
Bdh1	grey		Gak	grey	GAK
Bdp1	grey		Cnot10	grey	CNOT10
Bend6	grey		Asxl2	grey	ASXL2
Bex2	grey		Cd81	grey	CD81
Bfar	grey		Hnrnpf	grey	HNRNPF
Bhlhb9	grey		Dot1l	grey	DOT1L
Bicc1	grey		Rapgef5	grey	RAPGEF5
Bicd1	grey		Ric3	grey	RIC3
Birc2	grey		Deaf1	grey	DEAF1
Birc6	grey		Vsnl1	grey	VSNL1
Blmh	grey		Micu3	grey	MICU3
Bmp2k	grey		Poldip3	grey	POLDIP3
Bmp4	grey		Nap1l4	grey	NAP1L4
Bmp5	grey		Rrp1	grey	RRP1
Bmp7	grey		Slc43a2	grey	SLC43A2
Bmper	grey		Lrrtm3	grey	LRRTM3
Bmpr1a	grey		Tmem41b	grey	TMEM41B
Bmpr2	grey		Rbpj	grey	RBPJ
Bmyc	grey		Wdr70	grey	WDR70
Bnc2	grey		Cbfa2t2	grey	CBFA2T2
Boc	grey		Mtmr12	grey	MTMR12
Bod1l	grey		Med14	grey	MED14
Borcs5	grey		Bod1l	grey	BOD1L1
Bptf	grey		Mpv17	grey	MPV17
Braf	grey		Cmc1	grey	CMC1
Brd1	grey		Brd9	grey	BRD9
Brd3	grey		Cars2	grey	CARS2
Brd4	grey		Maea	grey	MAEA
Brd7	grey		Bcor	grey	BCOR
Brd8	grey		Phf8	grey	PHF8
Brd9	grey		Las1l	grey	LAS1L
Brdt	grey		Wnk3	grey	WNK3
Bre	grey		Cisd1	grey	CISD1
Bri3	grey		Zfp560	grey	ZNF121
Brinp2	grey		Coro7	grey	CORO7
Brinp3	grey		Prkaa1	grey	PRKAA1
Brip1os	grey		Rnf216	grey	RNF216
Brk1	grey		Fam210a	grey	FAM210A
Brms1l	grey		Slc25a23	grey	SLC25A23
Brox	grey		Rab31	grey	RAB31
Brsk1	grey		Zfp438	grey	ZNF438
Brsk2	grey		Vps41	grey	VPS41
Brwd1	grey		Spns2	grey	SPNS2
Brwd3	grey		Cdk13	grey	CDK13
Bscl2	grey		Hmgcs1	grey	HMGCS1
Bsdc1	grey		Usp14	grey	USP14
Bsg	grey		Irs2	grey	IRS2
Btaf1	grey		Tbc1d19	grey	TBC1D19
Btbd1	grey		Pcca	grey	PCCA
Btbd10	grey		Tom1	grey	TOM1
Btbd11	grey		Safb	grey	SAFB
Btbd3	grey		Tapt1	grey	TAPT1
Btbd7	grey		Cc2d2a	grey	CC2D2A
Btbd9	grey		Sf3b6	grey	SF3B6
Btf3l4	grey		AW549877	grey	C5orf51
Btg1	grey		Trpm3	grey	TRPM3
Btrc	grey		Jazf1	grey	JAZF1
Bves	grey		Dcun1d2	grey	DCUN1D2
Bzrap1	grey		Ctbp1	grey	CTBP1
Bzw2	grey		Tspyl2	grey	TSPYL2
C130026I21Rik	grey		Ercc6	grey	ERCC6
C130060K24Rik	grey		Uvssa	grey	UVSSA
C130071C03Rik	grey		Cdc42ep1	grey	CDC42EP1
C1ql3	grey		Asxl3	grey	ASXL3
C1qtnf4	grey		Dpy19l1	grey	DPY19L1
C1qtnf7	grey		Slc35e2	grey	SLC35E2B
C230088H06Rik	grey		Zcchc9	grey	ZCCHC9
C2cd2	grey		Slc25a27	grey	SLC25A27
C2cd3	grey		Klf3	grey	KLF3
C2cd5	grey		Cercam	grey	CERCAM
C330007P06Rik	grey		Prkcsh	grey	PRKCSH
C530008M17Rik	grey		Sdcbp	grey	SDCBP
C77370	grey		Tmem30a	grey	TMEM30A
C920021L13Rik	grey		Hcn1	grey	HCN1
Caap1	grey		Dcaf13	grey	DCAF13
Cab39	grey		Acvr2b	grey	ACVR2B
Cab39l	grey		Atl3	grey	ATL3
Cabin1	grey		Fnip1	grey	FNIP1
Cachd1	grey		Ctdspl2	grey	CTDSPL2
Cacna1b	grey		Xpo1	grey	XPO1
Cacna1d	grey		Polb	grey	POLB
Cacna1g	grey		Snx6	grey	SNX6
Cacna2d2	grey		Tmem50a	grey	TMEM50A
Cacnb3	grey		Tmem248	grey	TMEM248
Cacng2	grey		Dennd4a	grey	DENND4A
Cacng5	grey		Park7	grey	PARK7
Cacng7	grey		Rev1	grey	REV1
Cacng8	grey		Snap23	grey	SNAP23
Cacul1	grey		Eif2ak3	grey	EIF2AK3
Cadm1	grey		Ubr5	grey	UBR5
Cadm2	grey		Mcu	grey	MCU
Cadm3	grey		Ubr4	grey	UBR4
Calb1	grey		Syne2	grey	SYNE2
Calb2	grey		Fam172a	grey	FAM172A
Calcoco1	grey		Vps4b	grey	VPS4B
Calcrl	grey		Cep128	grey	CEP128
Cald1	grey		Nfkb1	grey	NFKB1
Calm1	grey		Shc4	grey	SHC4
Calm2	grey		Ano3	grey	ANO3
Calr	grey		Farsa	grey	FARSA
Caly	grey		Auts2	grey	AUTS2
Camk1	grey		Foxj3	grey	FOXJ3
Camk1d	grey		Pmepa1	grey	PMEPA1
Camk2d	grey		Trrap	grey	TRRAP
Camk2n1	grey		Fancc	grey	FANCC
Camkmt	grey		Sec23a	grey	SEC23A
Caml	grey		Ap4e1	grey	AP4E1
Camsap1	grey		Shank3	grey	SHANK3
Camsap2	grey		Ahdc1	grey	AHDC1
Camta1	grey		Bckdhb	grey	BCKDHB
Camta2	grey		Mtg2	grey	MTG2
Canx	grey		Gabpb1	grey	GABPB1
Cap1	grey		Plekha2	grey	PLEKHA2
Capn15	grey		Mapk1ip1l	grey	MAPK1IP1L
Capn2	grey		Rnf111	grey	RNF111
Capn7	grey		Epg5	grey	EPG5
Caprin1	grey		3830406C13Rik	grey	C3orf14
Caprin2	grey		Gramd3	grey	GRAMD2B
Capza1	grey		Prrc1	grey	PRRC1
Capza2	grey		Sacm1l	grey	SACM1L
Capzb	grey		Tmem260	grey	TMEM260
Car4	grey		Klhl32	grey	KLHL32
Car8	grey		Limd1	grey	LIMD1
Carf	grey		Fnbp4	grey	FNBP4
Carkd	grey		Ggnbp2	grey	GGNBP2
Carm1	grey		Atg10	grey	ATG10
Carnmt1	grey		Phactr4	grey	PHACTR4
Cars	grey		Tpd52	grey	TPD52
Casc3	grey		Cdh11	grey	CDH11
Casc4	grey		Golga7	grey	GOLGA7
Casd1	grey		Wdr82	grey	WDR82
Cask	grey		Nisch	grey	NISCH
Caskin1	grey		Camkmt	grey	CAMKMT
Cast	grey		Actn4	grey	ACTN4
Casz1	grey		Bmpr1a	grey	BMPR1A
Cav1	grey		Atp6v1c1	grey	ATP6V1C1
Cbarp	grey		Pxk	grey	PXK
Cbfa2t2	grey		Wwp1	grey	WWP1
Cbfb	grey		Sema6d	grey	SEMA6D
Cbl	grey		Smarca4	grey	SMARCA4
Cblb	grey		Ercc8	grey	ERCC8
Cbx1	grey		Por	grey	POR
Cbx3	grey		Jund	grey	JUND
Cbx4	grey		Pcbd2	grey	PCBD2
Cbx5	grey		Phf6	grey	PHF6
Cbx7	grey		Brd1	grey	BRD1
Cc2d2a	grey		Plekhh2	grey	PLEKHH2
Ccar1	grey		Dctn1	grey	DCTN1
Ccbe1	grey		Sycp2	grey	SYCP2
Ccdc112	grey		Trp53bp1	grey	TP53BP1
Ccdc12	grey		Ncbp1	grey	NCBP1
Ccdc136	grey		Pex14	grey	PEX14
Ccdc138	grey		Aftph	grey	AFTPH
Ccdc148	grey		Grid1	grey	GRID1
Ccdc149	grey		Ago4	grey	AGO4
Ccdc171	grey		Prex1	grey	PREX1
Ccdc174	grey		Helq	grey	HELQ
Ccdc186	grey		Cmtm4	grey	CMTM4
Ccdc191	grey		Asb3	grey	ASB3
Ccdc28a	grey		Wdfy3	grey	WDFY3
Ccdc30	grey		Ambra1	grey	AMBRA1
Ccdc34	grey		Psma7	grey	PSMA7
Ccdc47	grey		Rbm41	grey	RBM41
Ccdc50	grey		Gatm	grey	GATM
Ccdc57	grey		Arsb	grey	ARSB
Ccdc58	grey		Jkamp	grey	JKAMP
Ccdc6	grey		Fktn	grey	FKTN
Ccdc60	grey		Alms1	grey	ALMS1
Ccdc66	grey		Prkd3	grey	PRKD3
Ccdc73	grey		Zfp609	grey	ZNF609
Ccdc82	grey		Rnf167	grey	RNF167
Ccdc85a	grey		Ap3b1	grey	AP3B1
Ccdc88a	grey		Ttbk1	grey	TTBK1
Ccdc90b	grey		Arhgap17	grey	ARHGAP17
Ccdc91	grey		Tjap1	grey	TJAP1
Ccdc93	grey		Purb	grey	PURB
Cck	grey		Map3k7	grey	MAP3K7
Ccl25	grey		Casp8ap2	grey	CASP8AP2
Ccm2	grey		Myef2	grey	MYEF2
Ccm2l	grey		Shroom1	grey	SHROOM1
Ccnc	grey		Mtf1	grey	MTF1
Ccnd2	grey		Trappc9	grey	TRAPPC9
Ccnh	grey		Exoc1	grey	EXOC1
Ccni	grey		Sertad2	grey	SERTAD2
Ccnl1	grey		Zfp532	grey	ZNF532
Ccnl2	grey		Arid2	grey	ARID2
Ccnt1	grey		Nkap	grey	NKAP
Ccnt2	grey		Itfg1	grey	ITFG1
Ccny	grey		Snw1	grey	SNW1
Ccnyl1	grey		Supt6	grey	SUPT6H
Ccr9	grey		Scai	grey	SCAI
Ccs	grey		Hip1	grey	HIP1
Ccsap	grey		Fbxw4	grey	FBXW4
Ccser1	grey		Zfp280c	grey	ZNF280C
Ccser2	grey		Bcas1	grey	BCAS1
Cct3	grey		Psap	grey	PSAP
Ccz1	grey		Msh3	grey	MSH3
Cd180	grey		Tfcp2	grey	TFCP2
Cd200	grey		Diaph2	grey	DIAPH2
Cd2ap	grey		Slc3a2	grey	SLC3A2
Cd34	grey		Abhd5	grey	ABHD5
Cd46	grey		Zfp362	grey	ZNF362
Cd47	grey		Sgk3	grey	SGK3
Cd81	grey		Epb41l4a	grey	EPB41L4A
Cd99l2	grey		Pak3	grey	PAK3
Cdadc1	grey		Mlh3	grey	MLH3
Cdc123	grey		Man2a1	grey	MAN2A1
Cdc14a	grey		Atg5	grey	ATG5
Cdc14b	grey		Fyco1	grey	FYCO1
Cdc16	grey		Stx16	grey	STX16
Cdc23	grey		Lias	grey	LIAS
Cdc27	grey		Capzb	grey	CAPZB
Cdc40	grey		Erh	grey	ERH
Cdc42	grey		Pnpla7	grey	PNPLA7
Cdc42bpb	grey		Camta1	grey	CAMTA1
Cdc42ep3	grey		Slc25a28	grey	SLC25A28
Cdc42se2	grey		Nhlrc2	grey	NHLRC2
Cdc73	grey		Rc3h2	grey	RC3H2
Cdh11	grey		Psmd11	grey	PSMD11
Cdh13	grey		Phax	grey	PHAX
Cdh18	grey		Vapb	grey	VAPB
Cdh2	grey		Dhdds	grey	DHDDS
Cdh22	grey		Eps8	grey	EPS8
Cdh4	grey		Hmgcr	grey	HMGCR
Cdh5	grey		Gigyf1	grey	GIGYF1
Cdh6	grey		Pam	grey	PAM
Cdh7	grey		Sf1	grey	SF1
Cdip1	grey		Spsb1	grey	SPSB1
Cdk11b	grey		Sf3a3	grey	SF3A3
Cdk12	grey		Pkia	grey	PKIA
Cdk13	grey		Cox7b	grey	COX7B
Cdk16	grey		Hnrnpa0	grey	HNRNPA0
Cdk5	grey		Pnn	grey	PNN
Cdk5rap2	grey		2610507B11Rik	grey	KIAA0100
Cdk6	grey		Btaf1	grey	BTAF1
Cdk7	grey		Ddhd1	grey	DDHD1
Cdk8	grey		Srsf7	grey	SRSF7
Cdkal1	grey		Sltm	grey	SLTM
Cdkl1	grey		Cox6c	grey	COX6C
Cdkl2	grey		Ring1	grey	RING1
Cdkl3	grey		Cdan1	grey	CDAN1
Cdkl5	grey		Errfi1	grey	ERRFI1
Cdon	grey		Ulk2	grey	ULK2
Cds1	grey		Pkd2	grey	PKD2
Cds2	grey		Cpped1	grey	CPPED1
Cdv3	grey		Gpi1	grey	GPI
Cdyl	grey		Ptbp3	grey	PTBP3
Cdyl2	grey		Nfix	grey	NFIX
Cebpg	grey		Gnl3	grey	GNL3
Cebpz	grey		1110051M20Rik	grey	C11orf49
Cecr2	grey		Cox7c	grey	COX7C
Cecr5	grey		Bcl11a	grey	BCL11A
Celf1	grey		Zer1	grey	ZER1
Celf3	grey		Fkbp8	grey	FKBP8
Celf4	grey		Dnajb12	grey	DNAJB12
Celf6	grey		Borcs5	grey	BORCS5
Celsr3	grey		Gtf2i	grey	GTF2I
Cemip	grey		Smad5	grey	SMAD5
Cenpc1	grey		Rsl1d1	grey	RSL1D1
Cenpp	grey		Smg1	grey	SMG1
Cenpv	grey		Kif3a	grey	KIF3A
Cep112	grey		Mtch2	grey	MTCH2
Cep120	grey		Dennd6a	grey	DENND6A
Cep126	grey		Sema6a	grey	SEMA6A
Cep128	grey		Hnrnpl	grey	HNRNPL
Cep162	grey		Sh3glb2	grey	SH3GLB2
Cep164	grey		Rgs3	grey	RGS3
Cep170	grey		Hnrnpll	grey	HNRNPLL
Cep170b	grey		Tyw1	grey	TYW1
Cep19	grey		Eps15l1	grey	EPS15L1
Cep192	grey		Styx	grey	STYX
Cep250	grey		Depdc7	grey	DEPDC7
Cep290	grey		Nup93	grey	NUP93
Cep295	grey		Tcaim	grey	TCAIM
Cep350	grey		Ttc7b	grey	TTC7B
Cep57l1	grey		Hacd3	grey	HACD3
Cep63	grey		Sec31a	grey	SEC31A
Cep68	grey		Micu1	grey	MICU1
Cep70	grey		Urm1	grey	URM1
Cep78	grey		Hint1	grey	HINT1
Cep83	grey		Slc30a9	grey	SLC30A9
Cep85	grey		Arid1a	grey	ARID1A
Cep85l	grey		C2cd5	grey	C2CD5
Cep89	grey		Cipc	grey	CIPC
Cep95	grey		Mob1b	grey	MOB1B
Cep97	grey		Mtor	grey	MTOR
Cept1	grey		Hsp90ab1	grey	HSP90AB1
Cerk	grey		Trmt1	grey	TRMT1
Cers4	grey		Arih2	grey	ARIH2
Cers5	grey		Gpr137c	grey	GPR137C
Cers6	grey		Qtrt1	grey	QTRT1
Cfap20	grey		Rassf8	grey	RASSF8
Cfap36	grey		Tm9sf3	grey	TM9SF3
Cfap46	grey		Mapkap1	grey	MAPKAP1
Cfap69	grey		Tbc1d22a	grey	TBC1D22A
Cfap74	grey		Reep5	grey	REEP5
Cfdp1	grey		Papss1	grey	PAPSS1
Cfl2	grey		Atp8b1	grey	ATP8B1
Cftr	grey		Nrxn3	grey	NRXN3
Cgnl1	grey		Rars2	grey	RARS2
Chat	grey		Ythdf3	grey	YTHDF3
Chchd3	grey		Scamp1	grey	SCAMP1
Chchd6	grey		Ppa2	grey	PPA2
Chd1	grey		Mtif2	grey	MTIF2
Chd2	grey		Ythdc1	grey	YTHDC1
Chd3	grey		Ncoa3	grey	NCOA3
Chd4	grey		Brms1l	grey	BRMS1L
Chd5	grey		Trim44	grey	TRIM44
Chd6	grey		Calr	grey	CALR
Chd8	grey		Glud1	grey	GLUD1
Chd9	grey		Ecd	grey	ECD
Cherp	grey		Fbxw2	grey	FBXW2
Chfr	grey		Tac1	grey	TAC1
Chga	grey		Nde1	grey	NDE1
Chgb	grey		Borcs7	grey	BORCS7
Chic1	grey		Nelfb	grey	NELFB
Chic2	grey		Dnm2	grey	DNM2
Chid1	grey		Zfp14	grey	ZFP14
Chka	grey		Smim19	grey	SMIM19
Chl1	grey		Arfgef1	grey	ARFGEF1
Chm	grey		Dnajc8	grey	DNAJC8
Chmp3	grey		Usp46	grey	USP46
Chmp4b	grey		Kmt2b	grey	KMT2B
Chn2	grey		Atp11c	grey	ATP11C
Chordc1	grey		Brd2	grey	BRD2
Chp1	grey		Mapk6	grey	MAPK6
Chpf2	grey		Thsd4	grey	THSD4
Chpt1	grey		Atad1	grey	ATAD1
Chrm1	grey		Cep57l1	grey	CEP57L1
Chrm2	grey		Stx17	grey	STX17
Chrna7	grey		Tsc22d4	grey	TSC22D4
Chst1	grey		Psmb2	grey	PSMB2
Chst10	grey		Ptp4a1	grey	PTP4A1
Chst8	grey		Prpf39	grey	PRPF39
Chst9	grey		Mbd1	grey	MBD1
Chsy1	grey		BC005624	grey	C9orf78
Chsy3	grey		Mgat4a	grey	MGAT4A
Chuk	grey		Lnpep	grey	LNPEP
Cipc	grey		Scfd2	grey	SCFD2
Cisd2	grey		Cd2ap	grey	CD2AP
Cit	grey		Dffa	grey	DFFA
Ckap5	grey		Snx3	grey	SNX3
Ckb	grey		Phip	grey	PHIP
Clasp1	grey		Stx5a	grey	STX5
Clasrp	grey		Plod1	grey	PLOD1
Clcn2	grey		Vdac2	grey	VDAC2
Clcn3	grey		Adgrl1	grey	ADGRL1
Clcn5	grey		Tpst1	grey	TPST1
Clcn6	grey		Dnm1l	grey	DNM1L
Clcn7	grey		Snca	grey	SNCA
Cldn34c1	grey		Gatad2a	grey	GATAD2A
Cldn5	grey		Tcf7l2	grey	TCF7L2
Clec16a	grey		Arl15	grey	ARL15
Clec2d	grey		Gle1	grey	GLE1
Clgn	grey		Capns1	grey	CAPNS1
Clic1	grey		Stmn3	grey	STMN3
Clic5	grey		Cops5	grey	COPS5
Clint1	grey		Nxf1	grey	NXF1
Clip1	grey		Mex3c	grey	MEX3C
Clip2	grey		Ralgds	grey	RALGDS
Clip3	grey		Ankra2	grey	ANKRA2
Clk1	grey		Sec63	grey	SEC63
Clk2	grey		Nemf	grey	NEMF
Clk4	grey		Ehbp1	grey	EHBP1
Clmp	grey		Ide	grey	IDE
Clock	grey		Ddb1	grey	DDB1
Clpb	grey		Bicd1	grey	BICD1
Clpp	grey		Hnrnpr	grey	HNRNPR
Clptm1	grey		Map2k4	grey	MAP2K4
Clpx	grey		Dhx57	grey	DHX57
Clstn1	grey		Lrrfip2	grey	LRRFIP2
Clstn3	grey		Ttll11	grey	TTLL11
Clta	grey		Aldh6a1	grey	ALDH6A1
Cltb	grey		Ndufaf7	grey	NDUFAF7
Cltc	grey		Npc2	grey	NPC2
Cluap1	grey		Suz12	grey	SUZ12
Clvs2	grey		Phactr3	grey	PHACTR3
Cmip	grey		Ccnd3	grey	CCND3
Cmtm4	grey		Gatad1	grey	GATAD1
Cmtm8	grey		Pde7a	grey	PDE7A
Cnbd2	grey		Cnot6l	grey	CNOT6L
Cnih3	grey		Samd8	grey	SAMD8
Cnksr3	grey		Nedd4	grey	NEDD4
Cnn2	grey		Socs7	grey	SOCS7
Cnnm1	grey		Ammecr1	grey	AMMECR1
Cnnm2	grey		Rnf181	grey	RNF181
Cnot1	grey		Camk2n1	grey	CAMK2N1
Cnot10	grey		Ylpm1	grey	YLPM1
Cnot2	grey		Fam214a	grey	FAM214A
Cnot3	grey		Npas3	grey	NPAS3
Cnot4	grey		Btbd9	grey	BTBD9
Cnot6	grey		Epb41	grey	EPB41
Cnot6l	grey		Ift43	grey	IFT43
Cnot7	grey		Pus10	grey	PUS10
Cnrip1	grey		Slc12a9	grey	SLC12A9
Cnst	grey		Fkbp5	grey	FKBP5
Cntfr	grey		Tecr	grey	TECR
Cntln	grey		Tet2	grey	TET2
Cntn1	grey		Mto1	grey	MTO1
Cntn3	grey		Stmn1	grey	STMN1
Cntn6	grey		Rufy2	grey	RUFY2
Cntnap3	grey		Ankrd17	grey	ANKRD17
Cntnap4	grey		Arfgap1	grey	ARFGAP1
Cntnap5a	grey		Mcts1	grey	MCTS1
Cntnap5b	grey		Pdcd11	grey	PDCD11
Cntnap5c	grey		Rhoj	grey	RHOJ
Cntrl	grey		Ikbkb	grey	IKBKB
Cog3	grey		Ppard	grey	PPARD
Cog4	grey		Vamp2	grey	VAMP2
Cog5	grey		Polh	grey	POLH
Coil	grey		Pphln1	grey	PPHLN1
Col11a1	grey		Ythdf2	grey	YTHDF2
Col12a1	grey		Grik2	grey	GRIK2
Col13a1	grey		Scmh1	grey	SCMH1
Col14a1	grey		Ints8	grey	INTS8
Col15a1	grey		Pcmtd1	grey	PCMTD1
Col19a1	grey		Arhgap24	grey	ARHGAP24
Col1a1	grey		Fam222b	grey	FAM222B
Col1a2	grey		Tmod2	grey	TMOD2
Col23a1	grey		Caln1	grey	CALN1
Col25a1	grey		Ywhaz	grey	YWHAZ
Col26a1	grey		Rcan2	grey	RCAN2
Col3a1	grey		Ccdc66	grey	CCDC66
Col4a1	grey		Polr2b	grey	POLR2B
Col4a2	grey		Trmu	grey	TRMU
Col4a3bp	grey		Bach2	grey	BACH2
Col4a5	grey		Arl6ip1	grey	ARL6IP1
Col4a6	grey		Txndc15	grey	TXNDC15
Col5a2	grey		Adam22	grey	ADAM22
Col6a1	grey		Lars2	grey	LARS2
Col8a1	grey		Fsd1l	grey	FSD1L
Col9a2	grey		Rchy1	grey	RCHY1
Col9a3	grey		Adam9	grey	ADAM9
Colec12	grey		Myh10	grey	MYH10
Colgalt2	grey		Sdf2	grey	SDF2
Commd10	grey		Zfp407	grey	ZNF407
Comt	grey		1810013L24Rik	grey	C16orf72
Copa	grey		Atp6v1h	grey	ATP6V1H
Copb1	grey		Scap	grey	SCAP
Copg1	grey		Pum1	grey	PUM1
Copg2	grey		Ino80	grey	INO80
Cops3	grey		Kdsr	grey	KDSR
Cops5	grey		Atl2	grey	ATL2
Coq10a	grey		Prkar2a	grey	PRKAR2A
Coq10b	grey		Cox8a	grey	COX8A
Coq3	grey		Set	grey	SET
Coq5	grey		Adk	grey	ADK
Corin	grey		Eml6	grey	EML6
Coro1c	grey		Ash2l	grey	ASH2L
Coro2a	grey		Cep68	grey	CEP68
Coro2b	grey		Herc3	grey	HERC3
Coro6	grey		Zmiz2	grey	ZMIZ2
Coro7	grey		Bag4	grey	BAG4
Cotl1	grey		Slc38a6	grey	SLC38A6
Cox10	grey		Lzic	grey	LZIC
Cox11	grey		Kansl3	grey	KANSL3
Cox19	grey		Zfyve27	grey	ZFYVE27
Cox5a	grey		Inpp5b	grey	INPP5B
Cox6a1	grey		B230219D22Rik	grey	C5orf24
Cox7b	grey		Ext2	grey	EXT2
Cox7c	grey		Adck1	grey	ADCK1
Cox8a	grey		Crebl2	grey	CREBL2
Cp	grey		Yipf4	grey	YIPF4
Cpa6	grey		Cnep1r1	grey	CNEP1R1
Cpd	grey		Galk2	grey	GALK2
Cpeb1	grey		Ccdc186	grey	CCDC186
Cpeb2	grey		Txndc9	grey	TXNDC9
Cpeb3	grey		Nsrp1	grey	NSRP1
Cpeb4	grey		Pik3c2a	grey	PIK3C2A
Cped1	grey		Crim1	grey	CRIM1
Cphx3	grey		Exoc6	grey	EXOC6
Cplx1	grey		Hprt	grey	HPRT1
Cpne2	grey		Rfx7	grey	RFX7
Cpne3	grey		Sar1b	grey	SAR1B
Cpne4	grey		Vipas39	grey	VIPAS39
Cpne6	grey		Lrrcc1	grey	LRRCC1
Cpne8	grey		Arrdc3	grey	ARRDC3
Cpne9	grey		Vps13d	grey	VPS13D
Cpped1	grey		Mdh2	grey	MDH2
Cpsf3	grey		Zmym6	grey	ZMYM6
Cpsf6	grey		Ube2w	grey	UBE2W
Cpsf7	grey		Tshz1	grey	TSHZ1
Cpt1c	grey		Mapkbp1	grey	MAPKBP1
Cradd	grey		Cpeb3	grey	CPEB3
Cramp1l	grey		Calm1	grey	CALM1
Crat	grey		Ntng2	grey	NTNG2
Crbn	grey		Ppp6c	grey	PPP6C
Creb1	grey		Paip1	grey	PAIP1
Creb3l2	grey		Etf1	grey	ETF1
Crebbp	grey		Smurf1	grey	SMURF1
Crebl2	grey		Wdtc1	grey	WDTC1
Crebrf	grey		Rplp1	grey	RPLP1
Crebzf	grey		Akap10	grey	AKAP10
Creg2	grey		Cdc42se2	grey	CDC42SE2
Creld1	grey		Clvs1	grey	CLVS1
Crhr1	grey		Mtm1	grey	MTM1
Crim1	grey		Ptpdc1	grey	PTPDC1
Crispld1	grey		Apbb2	grey	APBB2
Crk	grey		Prkcb	grey	PRKCB
Crlf3	grey		Ell2	grey	ELL2
Crmp1	grey		Dennd1a	grey	DENND1A
Crtac1	grey		Snx2	grey	SNX2
Crtc1	grey		Ogt	grey	OGT
Crtc3	grey		Lin52	grey	LIN52
Cry2	grey		Tyk2	grey	TYK2
Cryl1	grey		Txndc11	grey	TXNDC11
Cs	grey		Ndufs4	grey	NDUFS4
Csdc2	grey		Pkn1	grey	PKN1
Csde1	grey		Wdr89	grey	WDR89
Cse1l	grey		Gfm2	grey	GFM2
Csf2ra	grey		Hdac8	grey	HDAC8
Csgalnact1	grey		Il6st	grey	IL6ST
Csmd2	grey		Mtdh	grey	MTDH
Csmd2os	grey		Myo5a	grey	MYO5A
Csmd3	grey		Tbc1d31	grey	TBC1D31
Csnk1a1	grey		Mllt6	grey	MLLT6
Csnk1d	grey		Clec16a	grey	CLEC16A
Csnk1e	grey		Taz	grey	TAZ
Csnk1g1	grey		Fbxl4	grey	FBXL4
Csnk1g3	grey		C330007P06Rik	grey	CXorf56
Csnk2a1	grey		Dhx30	grey	DHX30
Csnk2a2	grey		Vdac3	grey	VDAC3
Cspg4	grey		Frrs1l	grey	FRRS1L
Cspp1	grey		Arfgap2	grey	ARFGAP2
Csrnp3	grey		Srp72	grey	SRP72
Cstf2	grey		Cdk5rap2	grey	CDK5RAP2
Cstf3	grey		Herc4	grey	HERC4
Ctage5	grey		Asph	grey	ASPH
Ctcf	grey		Oxr1	grey	OXR1
Ctdspl	grey		Atp9b	grey	ATP9B
Ctdspl2	grey		Rnf19a	grey	RNF19A
Ctgf	grey		Sbf1	grey	SBF1
Cthrc1	grey		Rpgrip1l	grey	RPGRIP1L
Ctif	grey		Kpna6	grey	KPNA6
Ctla2a	grey		Fez2	grey	FEZ2
Ctnna1	grey		Fam135a	grey	FAM135A
Ctnna2	grey		Ctif	grey	CTIF
Ctnnal1	grey		Kdm1a	grey	KDM1A
Ctnnb1	grey		Hspa5	grey	HSPA5
Ctnnbip1	grey		Mfn2	grey	MFN2
Ctnnbl1	grey		Emc2	grey	EMC2
Ctps2	grey		Zbed4	grey	ZBED4
Ctr9	grey		Cd9	grey	CD9
Ctsb	grey		Ddx50	grey	DDX50
Ctsc	grey		Stim2	grey	STIM2
Ctsd	grey		Chp1	grey	CHP1
Ctsh	grey		Mlf2	grey	MLF2
Cttn	grey		Thoc2	grey	THOC2
Cttnbp2	grey		Nf1	grey	NF1
Cttnbp2nl	grey		Sec16a	grey	SEC16A
Ctxn3	grey		Arel1	grey	AREL1
Cuedc1	grey		Aldh7a1	grey	ALDH7A1
Cul1	grey		Hnrnpul2	grey	HNRNPUL2
Cul2	grey		Gosr1	grey	GOSR1
Cul3	grey		Pdhb	grey	PDHB
Cul4a	grey		Usp34	grey	USP34
Cul5	grey		Shoc2	grey	SHOC2
Cul9	grey		Hp1bp3	grey	HP1BP3
Cux1	grey		Rtf1	grey	RTF1
Cux2	grey		Cnrip1	grey	CNRIP1
Cwc22	grey		Rtn3	grey	RTN3
Cwc27	grey		Map4k5	grey	MAP4K5
Cwf19l2	grey		Mat2a	grey	MAT2A
Cxadr	grey		Ganc	grey	GANC
Cxcl12	grey		Pnisr	grey	PNISR
Cxxc4	grey		Ube4b	grey	UBE4B
Cxxc5	grey		Slc38a9	grey	SLC38A9
Cyb5a	grey		Tmem68	grey	TMEM68
Cyb5b	grey		Phkb	grey	PHKB
Cyb5r4	grey		Gapvd1	grey	GAPVD1
Cyfip1	grey		Mdh1	grey	MDH1
Cyp46a1	grey		Ccser2	grey	CCSER2
Cyp4x1	grey		Aff1	grey	AFF1
Cyp51	grey		Ugcg	grey	UGCG
Cyp7b1	grey		Rab22a	grey	RAB22A
Cystm1	grey		Larp6	grey	LARP6
Cyth1	grey		Tmem131	grey	TMEM131
Cyth3	grey		Ivd	grey	IVD
Cyyr1	grey		Ccdc167	grey	CCDC167
D030047H15Rik	grey		Sfpq	grey	SFPQ
D030068K23Rik	grey		Socs5	grey	SOCS5
D130043K22Rik	grey		Srpk1	grey	SRPK1
D15Ertd621e	grey		Cops4	grey	COPS4
D17Wsu92e	grey		Dnajc5	grey	DNAJC5
D1Ertd622e	grey		Nubpl	grey	NUBPL
D230017M19Rik	grey		Adgrb1	grey	ADGRB1
D230025D16Rik	grey		Stard7	grey	STARD7
D3Ertd751e	grey		Zfp706	grey	ZNF706
D430042O09Rik	grey		2210408I21Rik	grey	KIAA0825
D5Ertd579e	grey		Cdc42	grey	CDC42
D630045J12Rik	grey		Smarcc1	grey	SMARCC1
D8Ertd82e	grey		Rab11fip4	grey	RAB11FIP4
D930015E06Rik	grey		Zfp30	grey	ZFP30
D930016D06Rik	grey		Magt1	grey	MAGT1
Dab2	grey		Zfp608	grey	ZNF608
Dab2ip	grey		Gmeb1	grey	GMEB1
Dach2	grey		Gxylt1	grey	GXYLT1
Dag1	grey		Vcpip1	grey	VCPIP1
Dagla	grey		Samd4	grey	SAMD4A
Daglb	grey		Babam1	grey	BABAM1
Dapk1	grey		Bsn	grey	BSN
Dars	grey		Exosc10	grey	EXOSC10
Dazap1	grey		Utp6	grey	UTP6
Dcaf10	grey		Ppwd1	grey	PPWD1
Dcaf17	grey		Dnajc17	grey	DNAJC17
Dcaf5	grey		Kat6b	grey	KAT6B
Dcaf6	grey		Eef2k	grey	EEF2K
Dcaf7	grey		Gtf2a2	grey	GTF2A2
Dcaf8	grey		Stambp	grey	STAMBP
Dcakd	grey		Acaca	grey	ACACA
Dcbld1	grey		Wdpcp	grey	WDPCP
Dcdc2a	grey		Cdh8	grey	CDH8
Dclk1	grey		Smad3	grey	SMAD3
Dclk2	grey		Nin	grey	NIN
Dcn	grey		Phc1	grey	PHC1
Dcp1a	grey		Bcat1	grey	BCAT1
Dcp1b	grey		Tmem165	grey	TMEM165
Dctn1	grey		Dgkz	grey	DGKZ
Dctn2	grey		Brd3	grey	BRD3
Dctn4	grey		Pclo	grey	PCLO
Dctn6	grey		Snx24	grey	SNX24
Dcun1d1	grey		Ctnna1	grey	CTNNA1
Dcun1d2	grey		Sipa1l3	grey	SIPA1L3
Dcun1d3	grey		Nlk	grey	NLK
Dcun1d4	grey		Cobl	grey	COBL
Dcun1d5	grey		Pcbp4	grey	PCBP4
Dcx	grey		Aldoa	grey	ALDOA
Ddb2	grey		Abcc1	grey	ABCC1
Ddc	grey		Rapgef1	grey	RAPGEF1
Ddhd2	grey		Rspry1	grey	RSPRY1
Ddi2	grey		Tm7sf3	grey	TM7SF3
Ddit4l	grey		Uri1	grey	URI1
Ddo	grey		Stk38	grey	STK38
Ddr2	grey		Pds5a	grey	PDS5A
Ddx1	grey		Fancl	grey	FANCL
Ddx10	grey		Foxn2	grey	FOXN2
Ddx17	grey		Shmt1	grey	SHMT1
Ddx19b	grey		Kcnk10	grey	KCNK10
Ddx24	grey		Srsf5	grey	SRSF5
Ddx26b	grey		Cry2	grey	CRY2
Ddx39b	grey		Pdia3	grey	PDIA3
Ddx3x	grey		Rad17	grey	RAD17
Ddx3y	grey		4933427D14Rik	grey	KIAA0753
Ddx42	grey		Eya3	grey	EYA3
Ddx46	grey		Rhobtb3	grey	RHOBTB3
Ddx5	grey		Amn1	grey	AMN1
Ddx50	grey		Spg11	grey	SPG11
Ddx55	grey		Exosc7	grey	EXOSC7
Ddx6	grey		Lamp2	grey	LAMP2
Deaf1	grey		Scfd1	grey	SCFD1
Dennd1a	grey		Dido1	grey	DIDO1
Dennd1b	grey		Strn	grey	STRN
Dennd2a	grey		Zfp64	grey	ZFP64
Dennd3	grey		Rai1	grey	RAI1
Dennd4a	grey		Ptprf	grey	PTPRF
Dennd4c	grey		Pdcd4	grey	PDCD4
Dennd5a	grey		Exoc5	grey	EXOC5
Dennd5b	grey		Ppp3cb	grey	PPP3CB
Dennd6a	grey		Dguok	grey	DGUOK
Dennd6b	grey		Jmy	grey	JMY
Depdc5	grey		Ndufs3	grey	NDUFS3
Deptor	grey		Strn3	grey	STRN3
Desi1	grey		Psme4	grey	PSME4
Desi2	grey		Scg3	grey	SCG3
Dexi	grey		Zfyve1	grey	ZFYVE1
Dfna5	grey		Bdp1	grey	BDP1
Dgat1	grey		Zkscan1	grey	ZKSCAN1
Dgcr8	grey		2700049A03Rik	grey	KIAA0586
Dgkd	grey		Fcho2	grey	FCHO2
Dgke	grey		Ptch1	grey	PTCH1
Dgkg	grey		Cerk	grey	CERK
Dgkk	grey		Rapgef6	grey	RAPGEF6
Dgkz	grey		Rufy3	grey	RUFY3
Dguok	grey		Arhgef28	grey	ARHGEF28
Dhdds	grey		Rnf103	grey	RNF103
Dhps	grey		Sppl2a	grey	SPPL2A
Dhtkd1	grey		Eif4b	grey	EIF4B
Dhx15	grey		Tpd52l2	grey	TPD52L2
Dhx30	grey		Kansl2	grey	KANSL2
Dhx32	grey		Ip6k2	grey	IP6K2
Dhx36	grey		Ccnc	grey	CCNC
Dhx40	grey		Gpatch1	grey	GPATCH1
Dhx57	grey		Specc1	grey	SPECC1
Dhx9	grey		Wasf1	grey	WASF1
Diablo	grey		Rngtt	grey	RNGTT
Diaph1	grey		Ehmt1	grey	EHMT1
Dicer1	grey		Clstn1	grey	CLSTN1
Dido1	grey		Rmnd5a	grey	RMND5A
Dip2c	grey		Zc3h14	grey	ZC3H14
Diras2	grey		Bri3	grey	BRI3
Dirc2	grey		Grin2a	grey	GRIN2A
Dis3l2	grey		Cyb5a	grey	CYB5A
Disc1	grey		Hsd17b4	grey	HSD17B4
Disp1	grey		Mrps5	grey	MRPS5
Disp2	grey		Tet1	grey	TET1
Dixdc1	grey		Pou6f1	grey	POU6F1
Dlat	grey		Mga	grey	MGA
Dlc1	grey		Ccdc12	grey	CCDC12
Dld	grey		Snrnp200	grey	SNRNP200
Dlg3	grey		Zmat1	grey	ZMAT1
Dlg4	grey		Phf12	grey	PHF12
Dlg5	grey		Mitf	grey	MITF
Dlgap4	grey		Ascc3	grey	ASCC3
Dlk2	grey		Ccar1	grey	CCAR1
Dlst	grey		Atp6ap1	grey	ATP6AP1
Dlx1as	grey		Snx29	grey	SNX29
Dlx6os1	grey		Neo1	grey	NEO1
Dmd	grey		Nt5c2	grey	NT5C2
Dmtf1	grey		Pdss2	grey	PDSS2
Dmxl1	grey		Plxnb1	grey	PLXNB1
Dmxl2	grey		Mipol1	grey	MIPOL1
Dnah3	grey		Macrod1	grey	MACROD1
Dnah8	grey		Gfpt1	grey	GFPT1
Dnah9	grey		Fam149b	grey	FAM149B1
Dnaja1	grey		Chsy3	grey	CHSY3
Dnaja2	grey		Qrich1	grey	QRICH1
Dnaja3	grey		Fam120a	grey	FAM120A
Dnajb14	grey		Crlf3	grey	CRLF3
Dnajb4	grey		Ppm1b	grey	PPM1B
Dnajb6	grey		Snrnp40	grey	SNRNP40
Dnajc1	grey		Zfp523	grey	ZNF76
Dnajc10	grey		Wdr48	grey	WDR48
Dnajc11	grey		Gstz1	grey	GSTZ1
Dnajc13	grey		Dusp16	grey	DUSP16
Dnajc15	grey		Fam133b	grey	FAM133B
Dnajc17	grey		Cct4	grey	CCT4
Dnajc18	grey		Api5	grey	API5
Dnajc19	grey		Vps39	grey	VPS39
Dnajc21	grey		Dpp8	grey	DPP8
Dnajc24	grey		Hdac1	grey	HDAC1
Dnajc27	grey		Pex2	grey	PEX2
Dnajc3	grey		Map7d1	grey	MAP7D1
Dnajc5	grey		Usp20	grey	USP20
Dnajc6	grey		Herc1	grey	HERC1
Dnajc7	grey		Prdm2	grey	PRDM2
Dnajc8	grey		Me2	grey	ME2
Dnal1	grey		AU040320	grey	KIAA0319L
Dner	grey		Mtmr1	grey	MTMR1
Dnm1	grey		Tmem245	grey	TMEM245
Dnm1l	grey		Tmx3	grey	TMX3
Dnm2	grey		Ywhag	grey	YWHAG
Dnmbp	grey		Xkr4	grey	XKR4
Dnmt3a	grey		Senp1	grey	SENP1
Dnttip1	grey		Tmbim6	grey	TMBIM6
Dock11	grey		Zc2hc1a	grey	ZC2HC1A
Dock3	grey		Cep120	grey	CEP120
Dock4	grey		Flnb	grey	FLNB
Dock6	grey		Ldhb	grey	LDHB
Dock7	grey		Nup188	grey	NUP188
Dock9	grey		Map2k1	grey	MAP2K1
Dok5	grey		Akirin2	grey	AKIRIN2
Dok6	grey		Slc20a2	grey	SLC20A2
Dopey1	grey		Kctd13	grey	KCTD13
Dopey2	grey		Prdx2	grey	PRDX2
Dot1l	grey		Zfyve26	grey	ZFYVE26
Dpf2	grey		Usf2	grey	USF2
[truncated: 4,725 more rows]

## Sheet: WGCNA stats
Module	Celltype	Celltype DEGs	Module Genes	Overlap DEGs	Pval DEGs	Correlation Mod-Trait	Pval Mod-trait	Examplar gene	GO term	Pval GO term
Blue	OPC & Oligo	1299	290	258	4.437e-287	0.952544	<0.000001	MBP	Myelination	2.25e-11
Brown	Astrocyte	174	179	49	8.076e-63	0.935341	<0.000001	Slc1a3	L-glutamate import	0.00723
Green	Microglia	32	104	3	0.0004607	0.93993	<0.000001	Csf1r	immune system process	1.14e-17
Red	Excitatory	619	99	46	8.534e-45	0.855112	<0.000001	Satb2	synaptic vesicle exocytosis	0.000444
Turq	MSN	466	296	137	3.355e-153	0.872116	<0.000001	Adora2a	dopamine receptor signaling pathway	1.91e-05
Yellow	Excitatory & MSN	619	137	55	4.525e-49	0.499216	<0.000001	Rbfox1	synapse organization	9.48e-11
