# Supplementary material for: Huntington disease oligodendrocyte maturation deficits revealed by single-nucleus RNAseq are rescued by thiamine-biotin supplementation
Source: Nat Commun. 2022 Dec 21;13:7791. doi: 10.1038/s41467-022-35388-x (PMC9772349; doi:10.1038/s41467-022-35388-x)
Supplement: Supplementary file 6 — Supplementary Dataset 4 [file 41467_2022_35388_MOESM6_ESM.xlsx]

## Sheet: Green_MG bnet
from.x	to.x	strength.x	direction.x	degree.out	condcat	uninode	uninode	edgename
Csmd1	Nrg3	0.975806451612903	0.655913978494624	2	wthd	NA	NA	Csmd1 Nrg3
Csmd1	Kcnip4	1	0.725806451612903	2	wtNA	NA	NA	Csmd1 Kcnip4
Kcnip4	Eef2k	0.915322580645161	0.646505376344086	3	NAhd	NA	hd	Kcnip4 Eef2k
Kcnip4	Meg3	0.919354838709677	0.691532258064516	3	NAhd	NA	hd	Kcnip4 Meg3
Kcnip4	RP24-127M20.8	1	0.675403225806452	3	NAhd	NA	NA	Kcnip4 RP24-127M20.8
Nrg3	RP24-127M20.8	0.995967741935484	0.778225806451613	1	wtNA	NA	NA	Nrg3 RP24-127M20.8
Srgap2	Tgfbr1	0.967741935483871	0.577956989247312	1	wtNA	wt	wt	Srgap2 Tgfbr1

## Sheet: Brown_Astro bnet
from.x	to.x	strength.x	direction.x	degree.out	condcat	uninode	uninode	edgename
Aig1	Erc2	1	0.935483870967742	1	wthd	NA	NA	Aig1 Erc2
Anks1b	Nav3	0.875	0.932123655913979	2	NAhd	NA	NA	Anks1b Nav3
Anks1b	Phactr1	0.967741935483871	0.807123655913979	2	NAhd	NA	hd	Anks1b Phactr1
Anks1b	Cacna1a	0.995967741935484	0.696236559139785	1	wtNA	NA	wt	Anks1b Cacna1a
Apoe	Cst3	1	0.893145161290323	1	wthd	NA	NA	Apoe Cst3
Arpp21	PISD	0.991935483870968	0.805779569892473	1	NAhd	NA	hd	Arpp21 PISD
Atp1a2	Igsf8	0.911290322580645	0.922715053763441	1	NAhd	hd	hd	Atp1a2 Igsf8
Atp1b1	Slc22a23	0.850806451612903	0.918682795698925	1	wtNA	wt	wt	Atp1b1 Slc22a23
Cacna1a	Arpp21	0.903225806451613	0.856854838709677	1	wtNA	wt	NA	Cacna1a Arpp21
Cadm1	Rnf121	0.959677419354839	0.818548387096774	1	wtNA	wt	wt	Cadm1 Rnf121
Dlg2	Rbfox1	0.991935483870968	0.815188172043011	2	wtNA	NA	NA	Dlg2 Rbfox1
Dlg2	Nrg3	1	0.67741935483871	2	wtNA	NA	NA	Dlg2 Nrg3
Erc2	Slc24a3	0.987903225806452	0.949596774193548	1	NAhd	NA	hd	Erc2 Slc24a3
Fry	Cntn1	0.923387096774194	0.850806451612903	1	NAhd	NA	hd	Fry Cntn1
Fry	Mgat5	0.955645161290323	0.973118279569892	3	wtNA	NA	NA	Fry Mgat5
Fry	Lrig1	0.967741935483871	0.950268817204301	3	wtNA	NA	wt	Fry Lrig1
Fry	Lrp1b	1	0.973790322580645	3	wtNA	NA	NA	Fry Lrp1b
Galnt18	Pde10a	0.975806451612903	0.553763440860215	1	NAhd	hd	hd	Galnt18 Pde10a
Gm3764	Slc4a4	0.854838709677419	0.861559139784946	1	NAhd	NA	NA	Gm3764 Slc4a4
Gpc5	Etv4	0.858870967741935	0.968413978494624	19	wthd	NA	NA	Gpc5 Etv4
Gpc5	Trpm3	0.866935483870968	0.713709677419355	19	wthd	NA	NA	Gpc5 Trpm3
Gpc5	Pla2g7	0.866935483870968	0.793010752688172	19	wtNA	NA	wt	Gpc5 Pla2g7
Gpc5	Clmn	0.870967741935484	0.979838709677419	19	wtNA	NA	NA	Gpc5 Clmn
Gpc5	Mical2	0.870967741935484	0.801747311827957	19	wtNA	NA	NA	Gpc5 Mical2
Gpc5	Cml3	0.875	0.909274193548387	11	NAhd	NA	hd	Gpc5 Cml3
Gpc5	Rgs7	0.891129032258065	0.976478494623656	11	NAhd	NA	hd	Gpc5 Rgs7
Gpc5	Acsbg1	0.899193548387097	0.79502688172043	19	wthd	NA	NA	Gpc5 Acsbg1
Gpc5	Gm3764	0.919354838709677	0.938172043010753	19	wtNA	NA	NA	Gpc5 Gm3764
Gpc5	Frmpd1	0.931451612903226	0.815860215053763	19	wtNA	NA	wt	Gpc5 Frmpd1
Gpc5	Slc39a12	0.931451612903226	0.940860215053763	19	wtNA	NA	wt	Gpc5 Slc39a12
Gpc5	Gabra2	0.939516129032258	0.928763440860215	11	NAhd	NA	hd	Gpc5 Gabra2
Gpc5	Syne1	0.943548387096774	0.815188172043011	19	wthd	NA	NA	Gpc5 Syne1
Gpc5	Ccdc141	0.951612903225806	0.903897849462366	19	wtNA	NA	wt	Gpc5 Ccdc141
Gpc5	Npas3	0.951612903225806	0.991263440860215	19	wtNA	NA	wt	Gpc5 Npas3
Gpc5	Itpr2	0.959677419354839	0.899193548387097	11	NAhd	NA	hd	Gpc5 Itpr2
Gpc5	Mdga2	0.963709677419355	0.957661290322581	19	wthd	NA	NA	Gpc5 Mdga2
Gpc5	Fgfr3	0.967741935483871	0.839381720430108	19	wtNA	NA	wt	Gpc5 Fgfr3
Gpc5	Dbx2	0.967741935483871	0.80241935483871	19	wtNA	NA	wt	Gpc5 Dbx2
Gpc5	Nhsl1	0.967741935483871	0.967741935483871	19	wtNA	NA	wt	Gpc5 Nhsl1
Gpc5	Lrrc4c	0.971774193548387	0.904569892473118	11	NAhd	NA	hd	Gpc5 Lrrc4c
Gpc5	Lsamp	0.975806451612903	0.665994623655914	19	wtNA	NA	NA	Gpc5 Lsamp
Gpc5	Dpf3	0.983870967741935	0.842741935483871	19	wthd	NA	NA	Gpc5 Dpf3
Gpc5	Eps8	0.983870967741935	0.90255376344086	19	wtNA	NA	wt	Gpc5 Eps8
Lhfp	Zbtb16	0.879032258064516	0.793010752688172	1	wtNA	wt	wt	Lhfp Zbtb16
Lrp1b	Kank1	0.887096774193548	0.79233870967742	2	NAhd	NA	hd	Lrp1b Kank1
Lrp1b	Fry	0.991935483870968	0.650537634408602	2	NAhd	NA	NA	Lrp1b Fry
Lsamp	Gpc5	1	0.516129032258065	1	NAhd	NA	NA	Lsamp Gpc5
Luzp2	Lama3	0.94758064516129	0.917338709677419	1	wtNA	NA	NA	Luzp2 Lama3
Nav3	Diaph2	0.955645161290323	0.963709677419355	1	NAhd	NA	hd	Nav3 Diaph2
Nrg3	Anks1b	1	0.622983870967742	3	NAhd	NA	NA	Nrg3 Anks1b
Nrg3	Dlg2	1	0.63508064516129	3	NAhd	NA	NA	Nrg3 Dlg2
Nrg3	Rbfox1	1	0.917338709677419	1	wthd	NA	NA	Nrg3 Rbfox1
Ntm	Gpc5	1	0.709677419354839	1	wthd	NA	NA	Ntm Gpc5
Pitpnc1	Gm11713	1	0.945564516129032	1	wthd	NA	NA	Pitpnc1 Gm11713
Rbfox1	Aig1	0.915322580645161	0.910618279569892	2	wtNA	NA	NA	Rbfox1 Aig1
Rbfox1	Ciapin1	0.959677419354839	0.912634408602151	2	wtNA	NA	wt	Rbfox1 Ciapin1
Rbfox1	Anks1b	1	0.508064516129032	1	NAhd	NA	NA	Rbfox1 Anks1b
Slc1a2	F3	0.850806451612903	0.807795698924731	74	NAhd	NA	hd	Slc1a2 F3
Slc1a2	L3mbtl3	0.850806451612903	0.531586021505376	74	NAhd	NA	hd	Slc1a2 L3mbtl3
Slc1a2	Gm26704	0.850806451612903	0.653897849462366	74	NAhd	NA	hd	Slc1a2 Gm26704
Slc1a2	Wdr17	0.850806451612903	0.855510752688172	29	wthd	NA	NA	Slc1a2 Wdr17
Slc1a2	Cst3	0.858870967741935	0.811827956989247	74	NAhd	NA	NA	Slc1a2 Cst3
Slc1a2	Hes5	0.866935483870968	0.55510752688172	74	NAhd	NA	hd	Slc1a2 Hes5
Slc1a2	1700112E06Rik	0.866935483870968	0.556451612903226	74	NAhd	NA	hd	Slc1a2 1700112E06Rik
Slc1a2	Aifm3	0.870967741935484	0.70766129032258	74	NAhd	NA	hd	Slc1a2 Aifm3
Slc1a2	Dpyd	0.870967741935484	0.540994623655914	74	NAhd	NA	hd	Slc1a2 Dpyd
Slc1a2	D030047H15Rik	0.870967741935484	0.536290322580645	74	NAhd	NA	hd	Slc1a2 D030047H15Rik
Slc1a2	Dclk1	0.883064516129032	0.594086021505376	74	NAhd	NA	hd	Slc1a2 Dclk1
Slc1a2	Fam107a	0.883064516129032	0.544354838709677	74	NAhd	NA	hd	Slc1a2 Fam107a
Slc1a2	Arhgef10l	0.887096774193548	0.540322580645161	74	NAhd	NA	hd	Slc1a2 Arhgef10l
Slc1a2	Metap1d	0.887096774193548	0.547715053763441	74	NAhd	NA	hd	Slc1a2 Metap1d
Slc1a2	Gpm6b	0.887096774193548	0.629032258064516	29	wthd	NA	NA	Slc1a2 Gpm6b
Slc1a2	Fgf14	0.895161290322581	0.555779569892473	74	NAhd	NA	hd	Slc1a2 Fgf14
Slc1a2	Luzp2	0.899193548387097	0.769489247311828	74	NAhd	NA	NA	Slc1a2 Luzp2
Slc1a2	Mfge8	0.899193548387097	0.557795698924731	74	NAhd	NA	hd	Slc1a2 Mfge8
Slc1a2	Prodh	0.899193548387097	0.53494623655914	74	NAhd	NA	hd	Slc1a2 Prodh
Slc1a2	Clmn	0.907258064516129	0.964381720430108	29	wthd	NA	NA	Slc1a2 Clmn
Slc1a2	S1pr1	0.907258064516129	0.656586021505376	29	wthd	NA	NA	Slc1a2 S1pr1
Slc1a2	Glis3	0.915322580645161	0.570564516129032	29	wtNA	NA	wt	Slc1a2 Glis3
Slc1a2	Rorb	0.915322580645161	0.976478494623656	74	NAhd	NA	hd	Slc1a2 Rorb
Slc1a2	Acsl3	0.919354838709677	0.547715053763441	74	NAhd	NA	hd	Slc1a2 Acsl3
Slc1a2	Lama3	0.919354838709677	0.63239247311828	74	NAhd	NA	NA	Slc1a2 Lama3
Slc1a2	Gm16168	0.931451612903226	0.540994623655914	74	NAhd	NA	hd	Slc1a2 Gm16168
Slc1a2	Mical2	0.939516129032258	0.553763440860215	74	NAhd	NA	NA	Slc1a2 Mical2
Slc1a2	Irak2	0.943548387096774	0.590725806451613	74	NAhd	NA	hd	Slc1a2 Irak2
Slc1a2	Ptn	0.943548387096774	0.717741935483871	29	wthd	NA	NA	Slc1a2 Ptn
Slc1a2	Prdx6	0.94758064516129	0.595430107526882	29	wtNA	NA	wt	Slc1a2 Prdx6
Slc1a2	Cpe	0.951612903225806	0.672043010752688	29	wthd	NA	NA	Slc1a2 Cpe
Slc1a2	Caskin1	0.955645161290323	0.550403225806452	74	NAhd	NA	hd	Slc1a2 Caskin1
Slc1a2	Bcan	0.959677419354839	0.793682795698925	74	NAhd	NA	hd	Slc1a2 Bcan
Slc1a2	Dtna	0.963709677419355	0.836021505376344	29	wthd	NA	NA	Slc1a2 Dtna
Slc1a2	Lgi4	0.963709677419355	0.553091397849462	74	NAhd	NA	hd	Slc1a2 Lgi4
Slc1a2	Frmd4a	0.967741935483871	0.844086021505376	29	wthd	NA	NA	Slc1a2 Frmd4a
Slc1a2	Sparcl1	0.967741935483871	0.911962365591398	74	NAhd	NA	hd	Slc1a2 Sparcl1
Slc1a2	Trpm3	0.967741935483871	0.82258064516129	29	wtNA	NA	NA	Slc1a2 Trpm3
Slc1a2	Kcnn2	0.971774193548387	0.540994623655914	74	NAhd	NA	hd	Slc1a2 Kcnn2
Slc1a2	Clybl	0.975806451612903	0.57997311827957	29	wtNA	NA	wt	Slc1a2 Clybl
Slc1a2	Gldc	0.979838709677419	0.544354838709677	74	NAhd	NA	hd	Slc1a2 Gldc
Slc1a2	Ctnnd2	0.979838709677419	0.723790322580645	29	wtNA	NA	wt	Slc1a2 Ctnnd2
Slc1a2	Grin2c	0.983870967741935	0.649193548387097	29	wthd	NA	NA	Slc1a2 Grin2c
Slc1a2	Cadm1	0.983870967741935	0.809139784946237	29	wtNA	NA	wt	Slc1a2 Cadm1
Slc1a2	Slc1a3	0.983870967741935	0.659274193548387	74	NAhd	NA	hd	Slc1a2 Slc1a3
Slc1a2	Emx2os	0.987903225806452	0.868951612903226	29	wtNA	NA	wt	Slc1a2 Emx2os
Slc1a2	Gli3	0.987903225806452	0.579301075268817	29	wthd	NA	NA	Slc1a2 Gli3
Slc1a2	Nav3	0.987903225806452	0.976478494623656	29	wtNA	NA	NA	Slc1a2 Nav3
Slc1a2	Pdzph1	0.987903225806452	0.57258064516129	74	NAhd	NA	hd	Slc1a2 Pdzph1
Slc1a2	Tra2a	0.987903225806452	0.540994623655914	74	NAhd	NA	hd	Slc1a2 Tra2a
Slc1a2	Csrp1	0.991935483870968	0.540322580645161	74	NAhd	NA	hd	Slc1a2 Csrp1
Slc1a2	Sfxn5	0.991935483870968	0.5625	74	NAhd	NA	hd	Slc1a2 Sfxn5
Slc1a2	Gnao1	0.991935483870968	0.747983870967742	29	wthd	NA	NA	Slc1a2 Gnao1
Slc1a2	Nwd1	0.991935483870968	0.619623655913979	74	NAhd	NA	hd	Slc1a2 Nwd1
Slc1a2	Daam2	0.991935483870968	0.876344086021505	74	NAhd	NA	hd	Slc1a2 Daam2
Slc1a2	Efr3b	0.991935483870968	0.734543010752688	74	NAhd	NA	hd	Slc1a2 Efr3b
Slc1a2	Tspan7	0.991935483870968	0.553091397849462	29	wtNA	NA	NA	Slc1a2 Tspan7
Slc1a2	Ogt	0.991935483870968	0.550403225806452	74	NAhd	NA	hd	Slc1a2 Ogt
Slc1a2	Tprkb	0.995967741935484	0.702956989247312	74	NAhd	NA	hd	Slc1a2 Tprkb
Slc1a2	Guf1	0.995967741935484	0.61491935483871	74	NAhd	NA	hd	Slc1a2 Guf1
Slc1a2	Polr2a	0.995967741935484	0.550403225806452	74	NAhd	NA	hd	Slc1a2 Polr2a
Slc1a2	Prex2	0.995967741935484	0.738575268817204	29	wthd	NA	NA	Slc1a2 Prex2
Slc1a2	Slco1c1	0.995967741935484	0.816532258064516	29	wtNA	NA	wt	Slc1a2 Slco1c1
Slc1a2	Htra1	0.995967741935484	0.791666666666667	74	NAhd	NA	hd	Slc1a2 Htra1
Slc1a2	Rgs20	1	0.798387096774194	29	wthd	NA	NA	Slc1a2 Rgs20
Slc1a2	Grm3	1	0.717741935483871	29	wthd	NA	NA	Slc1a2 Grm3
Slc1a2	Ntm	1	0.719758064516129	74	NAhd	NA	NA	Slc1a2 Ntm
Slc1a2	Fam13c	1	0.701612903225806	29	wthd	NA	NA	Slc1a2 Fam13c
Slc1a2	Glul	1	0.693548387096774	74	NAhd	NA	hd	Slc1a2 Glul
Slc1a2	Ttyh1	1	0.546370967741935	74	NAhd	NA	hd	Slc1a2 Ttyh1
Slc1a2	Slc7a11	1	0.560483870967742	74	NAhd	NA	hd	Slc1a2 Slc7a11
Slc1a2	Phkg1	1	0.57258064516129	74	NAhd	NA	hd	Slc1a2 Phkg1
Slc1a2	Cspg5	1	0.633064516129032	29	wthd	NA	NA	Slc1a2 Cspg5
Slc1a2	Atp1a2	1	0.919354838709677	74	NAhd	NA	hd	Slc1a2 Atp1a2
Slc1a2	Gabrb1	1	0.798387096774194	74	NAhd	NA	hd	Slc1a2 Gabrb1
Slc1a2	Mertk	1	0.814516129032258	29	wthd	NA	NA	Slc1a2 Mertk
Slc1a2	Gm26843	1	0.752016129032258	29	wthd	NA	NA	Slc1a2 Gm26843
Slc1a2	Sgcd	1	0.544354838709677	74	NAhd	NA	hd	Slc1a2 Sgcd
Slc1a2	Gm3764	1	0.832661290322581	74	NAhd	NA	NA	Slc1a2 Gm3764
Slc1a2	Nrxn3	1	0.945564516129032	29	wtNA	NA	wt	Slc1a2 Nrxn3
Slc1a2	Plpp3	1	0.774193548387097	74	NAhd	NA	hd	Slc1a2 Plpp3
Slc1a2	Mgat5	1	0.540322580645161	74	NAhd	NA	NA	Slc1a2 Mgat5
Slc1a2	Msi2	1	0.558467741935484	74	NAhd	NA	hd	Slc1a2 Msi2
Slc1a2	Qk	1	0.868951612903226	74	NAhd	NA	hd	Slc1a2 Qk
Slc1a2	Farp1	1	0.685483870967742	74	NAhd	NA	hd	Slc1a2 Farp1
Trpm3	Dab1	0.895161290322581	0.868951612903226	5	wtNA	NA	wt	Trpm3 Dab1
Trpm3	Slc4a4	0.92741935483871	0.827956989247312	5	wtNA	NA	NA	Trpm3 Slc4a4
Trpm3	Slc6a11	0.931451612903226	0.894489247311828	5	wtNA	NA	wt	Trpm3 Slc6a11
Trpm3	Gm3764	0.94758064516129	0.637768817204301	1	NAhd	NA	NA	Trpm3 Gm3764
Trpm3	Gabbr2	0.963709677419355	0.975134408602151	5	wtNA	NA	wt	Trpm3 Gabbr2
Trpm3	Fry	1	0.929435483870968	5	wtNA	NA	NA	Trpm3 Fry
Tspan7	Slc1a2	1	0.524193548387097	1	NAhd	NA	NA	Tspan7 Slc1a2

## Sheet: Turquoise_MSN bnet
from.x	to.x	strength.x	direction.x	degree.out	condcat	uninode	uninode	edgename
Adarb2	Gm27247	0.858870967741935	1	3	NAhd	NA	NA	Adarb2 Gm27247
Adarb2	Dscam	0.907258064516129	0.991263440860215	3	NAhd	NA	NA	Adarb2 Dscam
Adarb2	Nrg3	1	0.637096774193548	3	NAhd	NA	NA	Adarb2 Nrg3
Adora2a	Cntnap3	0.862903225806452	0.672715053763441	9	wtNA	NA	wt	Adora2a Cntnap3
Adora2a	Oprd1	0.875	0.975806451612903	9	wtNA	NA	NA	Adora2a Oprd1
Adora2a	Nrg3	0.879032258064516	0.948252688172043	9	wtNA	NA	NA	Adora2a Nrg3
Adora2a	Sntg2	0.923387096774194	0.997983870967742	9	wtNA	NA	NA	Adora2a Sntg2
Adora2a	Penk	0.979838709677419	0.894489247311828	9	wtNA	NA	NA	Adora2a Penk
Adora2a	Ebf1	0.991935483870968	0.997983870967742	9	wtNA	NA	NA	Adora2a Ebf1
Adora2a	Drd1	1	0.935483870967742	9	wtNA	NA	NA	Adora2a Drd1
Adora2a	Mdk	1	0.921370967741935	9	wtNA	NA	wt	Adora2a Mdk
Adora2a	Drd2	1	0.653225806451613	9	wtNA	NA	NA	Adora2a Drd2
Brinp3	Mgll	0.887096774193548	1	5	NAhd	NA	hd	Brinp3 Mgll
Brinp3	Pde1c	0.895161290322581	0.931451612903226	5	NAhd	NA	NA	Brinp3 Pde1c
Brinp3	Cdh18	0.959677419354839	0.883736559139785	2	wthd	NA	NA	Brinp3 Cdh18
Brinp3	Kirrel3	0.987903225806452	1	2	wthd	NA	NA	Brinp3 Kirrel3
Brinp3	Kcnh1	0.995967741935484	1	5	NAhd	NA	NA	Brinp3 Kcnh1
Cacna2d3	Thsd7a	0.850806451612903	0.505376344086022	6	wtNA	NA	NA	Cacna2d3 Thsd7a
Cacna2d3	Kcnd2	0.850806451612903	0.995967741935484	7	NAhd	NA	NA	Cacna2d3 Kcnd2
Cacna2d3	Gm20754	0.903225806451613	1	7	NAhd	NA	NA	Cacna2d3 Gm20754
Cacna2d3	Adamts3	0.935483870967742	0.997983870967742	7	NAhd	NA	hd	Cacna2d3 Adamts3
Cacna2d3	Lrfn5	0.943548387096774	1	6	wtNA	NA	NA	Cacna2d3 Lrfn5
Cacna2d3	Kcnt2	0.94758064516129	1	7	NAhd	NA	NA	Cacna2d3 Kcnt2
Cacna2d3	Kcnab1	0.955645161290323	0.514784946236559	7	NAhd	NA	NA	Cacna2d3 Kcnab1
Cacna2d3	Galnt18	0.983870967741935	1	6	wtNA	NA	NA	Cacna2d3 Galnt18
Cacna2d3	Agbl4	0.983870967741935	1	6	wtNA	NA	NA	Cacna2d3 Agbl4
Cacna2d3	Fstl4	0.995967741935484	0.959677419354839	6	wthd	NA	NA	Cacna2d3 Fstl4
Cacna2d3	Lrtm1	1	1	6	wthd	NA	NA	Cacna2d3 Lrtm1
Cacnb2	Rerg	0.891129032258065	0.906586021505376	9	wtNA	NA	wt	Cacnb2 Rerg
Cacnb2	Kcnk2	0.899193548387097	0.551075268817204	9	wtNA	NA	wt	Cacnb2 Kcnk2
Cacnb2	Nav3	0.915322580645161	1	9	wtNA	NA	wt	Cacnb2 Nav3
Cacnb2	Sorcs2	0.967741935483871	0.952284946236559	9	wtNA	NA	NA	Cacnb2 Sorcs2
Cacnb2	Hs6st3	0.987903225806452	0.571236559139785	9	wtNA	NA	NA	Cacnb2 Hs6st3
Cacnb2	Wbscr17	0.995967741935484	0.975806451612903	9	wtNA	NA	NA	Cacnb2 Wbscr17
Cacnb2	Cnr1	1	0.622983870967742	9	wtNA	NA	NA	Cacnb2 Cnr1
Cacnb2	Gm10848	1	0.838709677419355	9	wthd	NA	NA	Cacnb2 Gm10848
Cacnb2	Gm13269	1	0.838709677419355	9	wthd	NA	NA	Cacnb2 Gm13269
Cdh8	Camk4	0.866935483870968	1	2	NAhd	NA	NA	Cdh8 Camk4
Cdh8	A330008L17Rik	1	1	1	wthd	NA	NA	Cdh8 A330008L17Rik
Cfap54	PISD	1	0.965725806451613	1	NAhd	NA	NA	Cfap54 PISD
Cnr1	Itga9	0.862903225806452	0.973790322580645	5	wtNA	NA	NA	Cnr1 Itga9
Cnr1	Malat1	0.891129032258065	0.995967741935484	5	wtNA	NA	NA	Cnr1 Malat1
Cnr1	Il1rapl2	0.899193548387097	0.954301075268817	5	wtNA	NA	NA	Cnr1 Il1rapl2
Cnr1	Hs6st3	1	0.518145161290323	5	wtNA	NA	NA	Cnr1 Hs6st3
Cnr1	Dpp10	1	1	5	wtNA	NA	NA	Cnr1 Dpp10
Cntn4	Slc24a2	0.959677419354839	0.956317204301075	1	NAhd	NA	NA	Cntn4 Slc24a2
Cntn5	Cttnbp2	0.887096774193548	1	5	wtNA	NA	wt	Cntn5 Cttnbp2
Cntn5	Dgkb	0.923387096774194	0.986559139784946	5	wtNA	NA	NA	Cntn5 Dgkb
Cntn5	Thsd7a	0.987903225806452	0.995967741935484	5	wtNA	NA	NA	Cntn5 Thsd7a
Cntn5	Cdh12	1	1	5	wthd	NA	NA	Cntn5 Cdh12
Cntn5	Tenm2	1	0.995967741935484	5	wthd	NA	NA	Cntn5 Tenm2
Cntnap2	D030068K23Rik	0.915322580645161	1	2	NAhd	NA	hd	Cntnap2 D030068K23Rik
Cntnap2	Sema5b	0.971774193548387	0.971774193548387	2	NAhd	NA	NA	Cntnap2 Sema5b
Dach1	Inpp4b	0.915322580645161	0.970430107526882	8	wthd	NA	NA	Dach1 Inpp4b
Dach1	Frmd4b	0.92741935483871	0.866263440860215	8	wtNA	NA	NA	Dach1 Frmd4b
Dach1	Ebf1	0.931451612903226	1	8	wtNA	NA	NA	Dach1 Ebf1
Dach1	Gm26883	0.971774193548387	0.995967741935484	8	wthd	NA	NA	Dach1 Gm26883
Dach1	Lmo3	0.975806451612903	0.962365591397849	8	NAhd	NA	hd	Dach1 Lmo3
Dach1	Pcdh9	0.987903225806452	1	8	wthd	NA	NA	Dach1 Pcdh9
Dach1	Ablim1	0.991935483870968	0.995967741935484	8	wthd	NA	NA	Dach1 Ablim1
Dach1	Tshz2	0.991935483870968	0.979838709677419	8	NAhd	NA	NA	Dach1 Tshz2
Dach1	Cdh8	0.995967741935484	1	8	NAhd	NA	NA	Dach1 Cdh8
Dach1	Reln	0.995967741935484	0.973790322580645	8	wtNA	NA	NA	Dach1 Reln
Dach1	Robo2	1	0.997983870967742	8	wthd	NA	NA	Dach1 Robo2
Dclk1	Gm21954	0.971774193548387	1	1	wthd	NA	NA	Dclk1 Gm21954
Ddx5	A930015D03Rik	0.850806451612903	0.939516129032258	1	wtNA	NA	wt	Ddx5 A930015D03Rik
Dfna5	Mpp6	1	0.870967741935484	1	wthd	NA	NA	Dfna5 Mpp6
Dnah6	PISD	0.862903225806452	0.797715053763441	1	NAhd	hd	NA	Dnah6 PISD
Dpp6	Sema5b	0.979838709677419	0.94489247311828	1	wtNA	wt	NA	Dpp6 Sema5b
Drd2	Dscam	0.875	0.995967741935484	26	wtNA	NA	NA	Drd2 Dscam
Drd2	Il1rapl2	0.887096774193548	0.770161290322581	26	wtNA	NA	NA	Drd2 Il1rapl2
Drd2	Fig4	0.895161290322581	1	26	wtNA	NA	NA	Drd2 Fig4
Drd2	Stmn2	0.907258064516129	0.684139784946237	26	wtNA	NA	NA	Drd2 Stmn2
Drd2	Ambra1	0.911290322580645	0.657258064516129	26	wtNA	NA	wt	Drd2 Ambra1
Drd2	Utrn	0.92741935483871	0.977822580645161	26	wtNA	NA	wt	Drd2 Utrn
Drd2	Prkd1	0.935483870967742	1	26	wtNA	NA	wt	Drd2 Prkd1
Drd2	Fstl5	0.959677419354839	0.967741935483871	26	wtNA	NA	NA	Drd2 Fstl5
Drd2	Sgcz	0.963709677419355	0.968413978494624	26	wtNA	NA	NA	Drd2 Sgcz
Drd2	Nell1	0.975806451612903	0.939516129032258	26	wtNA	NA	NA	Drd2 Nell1
Drd2	Galnt13	0.979838709677419	0.853494623655914	26	wtNA	NA	wt	Drd2 Galnt13
Drd2	Necab1	0.987903225806452	0.994623655913978	26	wtNA	NA	NA	Drd2 Necab1
Drd2	Nrg3	0.995967741935484	0.933467741935484	26	wthd	NA	NA	Drd2 Nrg3
Drd2	Grik2	0.995967741935484	0.987903225806452	26	wtNA	NA	NA	Drd2 Grik2
Drd2	Oprd1	1	0.979838709677419	26	wtNA	NA	NA	Drd2 Oprd1
Drd2	Galnt18	1	0.993951612903226	26	wthd	NA	NA	Drd2 Galnt18
Drd2	Erbb4	1	0.935483870967742	26	wthd	NA	NA	Drd2 Erbb4
Drd2	Adarb2	1	0.995967741935484	26	wthd	NA	NA	Drd2 Adarb2
Drd2	Cntnap3	1	0.715725806451613	26	wtNA	NA	wt	Drd2 Cntnap3
Drd2	Ebf1	1	0.985887096774194	26	wthd	NA	NA	Drd2 Ebf1
Drd2	Foxp2	1	0.993951612903226	26	wtNA	NA	NA	Drd2 Foxp2
Drd2	Sntg2	1	0.997983870967742	26	wtNA	NA	NA	Drd2 Sntg2
Drd2	Nrxn1	1	0.971774193548387	26	wtNA	NA	NA	Drd2 Nrxn1
Drd2	Penk	1	0.895161290322581	26	wtNA	NA	NA	Drd2 Penk
Drd2	Mdk	1	0.881048387096774	26	wtNA	NA	wt	Drd2 Mdk
Drd2	Drd1	1	0.935483870967742	26	wtNA	NA	NA	Drd2 Drd1
Dtnb	Dtnbos	0.979838709677419	0.993951612903226	1	wtNA	wt	wt	Dtnb Dtnbos
Ebf1	Ntng1	0.850806451612903	1	15	wtNA	NA	wt	Ebf1 Ntng1
Ebf1	Nell1	0.858870967741935	0.997983870967742	15	wthd	NA	NA	Ebf1 Nell1
Ebf1	Lrfn5	0.862903225806452	0.983870967741935	45	NAhd	NA	NA	Ebf1 Lrfn5
Ebf1	Samd5	0.879032258064516	1	15	wthd	NA	NA	Ebf1 Samd5
Ebf1	Slc44a5	0.883064516129032	1	15	wthd	NA	NA	Ebf1 Slc44a5
Ebf1	Kcnt2	0.891129032258065	1	45	NAhd	NA	NA	Ebf1 Kcnt2
Ebf1	Gucy1b3	0.911290322580645	0.979838709677419	45	NAhd	NA	hd	Ebf1 Gucy1b3
Ebf1	Sfmbt2	0.919354838709677	0.997311827956989	15	wtNA	NA	wt	Ebf1 Sfmbt2
Ebf1	Ildr2	0.923387096774194	1	45	NAhd	NA	hd	Ebf1 Ildr2
Ebf1	Gulp1	0.92741935483871	1	45	NAhd	NA	NA	Ebf1 Gulp1
Ebf1	Wbscr17	0.931451612903226	1	45	NAhd	NA	NA	Ebf1 Wbscr17
Ebf1	Tac1	0.935483870967742	0.970430107526882	45	NAhd	NA	NA	Ebf1 Tac1
Ebf1	Sntg2	0.943548387096774	0.997983870967742	15	wthd	NA	NA	Ebf1 Sntg2
Ebf1	Gabrg3	0.94758064516129	1	45	NAhd	NA	NA	Ebf1 Gabrg3
Ebf1	Pou6f2	0.951612903225806	0.997983870967742	45	NAhd	NA	hd	Ebf1 Pou6f2
Ebf1	6530403H02Rik	0.959677419354839	1	15	wthd	NA	NA	Ebf1 6530403H02Rik
Ebf1	Slc24a3	0.963709677419355	1	45	NAhd	NA	hd	Ebf1 Slc24a3
Ebf1	Fig4	0.963709677419355	0.997983870967742	15	wthd	NA	NA	Ebf1 Fig4
Ebf1	Prkch	0.967741935483871	1	45	NAhd	NA	NA	Ebf1 Prkch
Ebf1	Mgat4c	0.967741935483871	1	15	wthd	NA	NA	Ebf1 Mgat4c
Ebf1	Oprd1	0.967741935483871	0.988575268817204	15	wthd	NA	NA	Ebf1 Oprd1
Ebf1	Gnas	0.975806451612903	1	45	NAhd	NA	hd	Ebf1 Gnas
Ebf1	Reln	0.975806451612903	0.959005376344086	45	NAhd	NA	NA	Ebf1 Reln
Ebf1	Cacna1e	0.987903225806452	0.987903225806452	45	NAhd	NA	hd	Ebf1 Cacna1e
Ebf1	Bmp6	0.991935483870968	0.993951612903226	45	NAhd	NA	hd	Ebf1 Bmp6
Ebf1	Dgkz	0.995967741935484	0.997983870967742	45	NAhd	NA	hd	Ebf1 Dgkz
Ebf1	Necab1	0.995967741935484	1	15	wthd	NA	NA	Ebf1 Necab1
Ebf1	Vat1l	1	0.997983870967742	45	NAhd	NA	hd	Ebf1 Vat1l
Ebf1	Gucy1a3	1	1	45	NAhd	NA	hd	Ebf1 Gucy1a3
Ebf1	Kcnd3	1	0.733870967741935	45	NAhd	NA	hd	Ebf1 Kcnd3
Ebf1	Foxp2	1	0.985887096774194	45	NAhd	NA	NA	Ebf1 Foxp2
Ebf1	Adora2a	1	0.981854838709677	45	NAhd	NA	NA	Ebf1 Adora2a
Ebf1	Fam19a2	1	0.973790322580645	45	NAhd	NA	NA	Ebf1 Fam19a2
Ebf1	Sec14l1	1	0.981854838709677	45	NAhd	NA	hd	Ebf1 Sec14l1
Ebf1	Zfp804a	1	1	45	NAhd	NA	NA	Ebf1 Zfp804a
Ebf1	Stmn2	1	0.981854838709677	45	NAhd	NA	NA	Ebf1 Stmn2
Ebf1	Ccdc88c	1	1	15	wthd	NA	NA	Ebf1 Ccdc88c
Ebf1	Fam155a	1	1	45	NAhd	NA	NA	Ebf1 Fam155a
Ebf1	Adarb2	1	0.965725806451613	45	NAhd	NA	NA	Ebf1 Adarb2
Ebf1	Nrg3	1	0.98991935483871	45	NAhd	NA	NA	Ebf1 Nrg3
Ebf1	Cdh13	1	0.979838709677419	15	wthd	NA	NA	Ebf1 Cdh13
Ebf1	Il1rapl2	1	0.991935483870968	45	NAhd	NA	NA	Ebf1 Il1rapl2
Ebf1	Drd1	1	0.993951612903226	45	NAhd	NA	NA	Ebf1 Drd1
Ebf1	Fstl5	1	0.987903225806452	45	NAhd	NA	NA	Ebf1 Fstl5
Ebf1	Penk	1	0.993951612903226	45	NAhd	NA	NA	Ebf1 Penk
Ebf1	Rps6ka5	1	1	15	wthd	NA	NA	Ebf1 Rps6ka5
Ebf1	Htr4	1	1	15	wthd	NA	NA	Ebf1 Htr4
Erbb4	Cacnb2	0.987903225806452	1	2	NAhd	NA	NA	Erbb4 Cacnb2
Erbb4	Necab1	0.995967741935484	1	2	NAhd	NA	NA	Erbb4 Necab1
Fam155a	Plekhg5	0.879032258064516	1	5	wtNA	NA	wt	Fam155a Plekhg5
Fam155a	Cdk14	0.935483870967742	1	5	wthd	NA	NA	Fam155a Cdk14
Fam155a	Prkch	0.963709677419355	1	5	wtNA	NA	NA	Fam155a Prkch
Fam155a	Agbl4	0.979838709677419	1	6	NAhd	NA	NA	Fam155a Agbl4
Fam155a	Man1a	0.983870967741935	1	5	wthd	NA	NA	Fam155a Man1a
Fam155a	Gm27247	1	0.899193548387097	6	NAhd	NA	NA	Fam155a Gm27247
Fam155a	Pdzd2	1	1	6	NAhd	NA	NA	Fam155a Pdzd2
Fam155a	Kcnq5	1	0.995967741935484	5	wthd	NA	NA	Fam155a Kcnq5
Fam196b	Dock2	1	0.92741935483871	1	wthd	NA	NA	Fam196b Dock2
Fam19a2	Erbb4	0.850806451612903	0.979838709677419	1	wthd	NA	NA	Fam19a2 Erbb4
Fam19a2	Tenm1	0.975806451612903	1	2	NAhd	NA	NA	Fam19a2 Tenm1
Foxp1	Phactr1	0.875	0.791666666666667	1	NAhd	NA	NA	Foxp1 Phactr1
Foxp2	Opcml	0.870967741935484	1	1	NAhd	NA	NA	Foxp2 Opcml
Foxp2	Zfhx3	0.963709677419355	1	2	wtNA	NA	NA	Foxp2 Zfhx3
Foxp2	Htr2c	0.963709677419355	0.997983870967742	2	wtNA	NA	wt	Foxp2 Htr2c
Garem	Ptpn5	0.887096774193548	0.904569892473118	1	NAhd	hd	hd	Garem Ptpn5
Gli3	Tenm2	0.995967741935484	0.919354838709677	1	NAhd	NA	NA	Gli3 Tenm2
Gm10848	Gm13269	1	0.80241935483871	1	wtNA	NA	NA	Gm10848 Gm13269
Gm13974	Gm28494	1	1	1	wthd	NA	NA	Gm13974 Gm28494
Gm20754	4930509J09Rik	1	1	1	wthd	NA	NA	Gm20754 4930509J09Rik
Gm21092	Gm26804	1	0.963709677419355	1	NAhd	hd	hd	Gm21092 Gm26804
Gm26835	BC005561	0.883064516129032	0.540994623655914	1	NAhd	hd	hd	Gm26835 BC005561
Gm26836	Gm42439	0.854838709677419	0.543010752688172	2	NAhd	NA	hd	Gm26836 Gm42439
Gm26836	Prkar2b	0.866935483870968	0.960349462365591	2	NAhd	NA	hd	Gm26836 Prkar2b
Gm26883	Tshz2	1	0.993951612903226	1	wthd	NA	NA	Gm26883 Tshz2
Gm27247	Pitpnm3	0.959677419354839	0.975806451612903	4	wtNA	NA	wt	Gm27247 Pitpnm3
Gm27247	Iqgap2	1	0.997983870967742	4	wtNA	NA	wt	Gm27247 Iqgap2
Gm27247	Kcnh1	1	0.891129032258065	4	wtNA	NA	NA	Gm27247 Kcnh1
Gm27247	1700057H15Rik	1	0.997983870967742	4	wthd	NA	NA	Gm27247 1700057H15Rik
Gm28609	Pik3c2b	0.991935483870968	0.855510752688172	1	NAhd	hd	hd	Gm28609 Pik3c2b
Gm30382	Adgrl2	1	0.94758064516129	1	wthd	NA	NA	Gm30382 Adgrl2
Gpc6	Khdrbs2	0.850806451612903	0.635752688172043	9	wtNA	NA	wt	Gpc6 Khdrbs2
Gpc6	Dpp6	0.862903225806452	0.975806451612903	9	wtNA	NA	wt	Gpc6 Dpp6
Gpc6	Cdh10	0.903225806451613	1	9	wtNA	NA	wt	Gpc6 Cdh10
Gpc6	Col25a1	0.931451612903226	0.831989247311828	9	wtNA	NA	wt	Gpc6 Col25a1
Gpc6	Kcnt2	0.955645161290323	1	9	wtNA	NA	NA	Gpc6 Kcnt2
Gpc6	Nlgn1	0.971774193548387	0.958333333333333	9	wtNA	NA	NA	Gpc6 Nlgn1
Gpc6	Kcnq5	0.971774193548387	0.940860215053763	1	NAhd	NA	NA	Gpc6 Kcnq5
Gpc6	Kcnq3	0.995967741935484	1	9	wtNA	NA	wt	Gpc6 Kcnq3
Gpc6	Hs6st2	1	1	9	wtNA	NA	wt	Gpc6 Hs6st2
Gpc6	Neto1	1	0.993951612903226	9	wtNA	NA	wt	Gpc6 Neto1
Grm1	Gpc6	0.987903225806452	0.619623655913978	1	wtNA	wt	NA	Grm1 Gpc6
Homer1	Slc2a13	0.879032258064516	0.958333333333333	1	NAhd	hd	NA	Homer1 Slc2a13
Hs6st3	Dock2	0.875	0.92741935483871	59	wtNA	NA	NA	Hs6st3 Dock2
Hs6st3	Slit3	0.879032258064516	0.997311827956989	39	NAhd	NA	NA	Hs6st3 Slit3
Hs6st3	Inf2	0.879032258064516	0.980510752688172	39	NAhd	NA	NA	Hs6st3 Inf2
Hs6st3	9430020K01Rik	0.883064516129032	0.916666666666667	59	wtNA	NA	wt	Hs6st3 9430020K01Rik
Hs6st3	Rbfox1	0.891129032258065	0.95497311827957	59	wtNA	NA	wt	Hs6st3 Rbfox1
Hs6st3	A330102I10Rik	0.899193548387097	0.715725806451613	59	wtNA	NA	wt	Hs6st3 A330102I10Rik
Hs6st3	Kcnd2	0.899193548387097	1	59	wthd	NA	NA	Hs6st3 Kcnd2
Hs6st3	Slc24a2	0.899193548387097	1	59	wtNA	NA	NA	Hs6st3 Slc24a2
Hs6st3	Dach1	0.903225806451613	0.911290322580645	59	wtNA	NA	NA	Hs6st3 Dach1
Hs6st3	Pid1	0.911290322580645	0.940860215053763	59	wthd	NA	NA	Hs6st3 Pid1
Hs6st3	Foxp1	0.911290322580645	0.990591397849462	59	wtNA	NA	NA	Hs6st3 Foxp1
Hs6st3	Strn	0.923387096774194	0.903897849462366	59	wtNA	NA	wt	Hs6st3 Strn
Hs6st3	Syndig1l	0.923387096774194	0.895161290322581	59	wtNA	NA	wt	Hs6st3 Syndig1l
Hs6st3	Ric8b	0.92741935483871	0.680779569892473	59	wtNA	NA	wt	Hs6st3 Ric8b
Hs6st3	Lsamp	0.931451612903226	0.930779569892473	59	wthd	NA	NA	Hs6st3 Lsamp
Hs6st3	Gpr158	0.931451612903226	0.985215053763441	59	wthd	NA	NA	Hs6st3 Gpr158
Hs6st3	Dgki	0.931451612903226	0.977822580645161	59	wthd	NA	NA	Hs6st3 Dgki
Hs6st3	Gli3	0.939516129032258	0.997983870967742	59	wthd	NA	NA	Hs6st3 Gli3
Hs6st3	Greb1l	0.943548387096774	0.966397849462366	59	wtNA	NA	wt	Hs6st3 Greb1l
Hs6st3	9630028H03Rik	0.943548387096774	0.98991935483871	59	wtNA	NA	NA	Hs6st3 9630028H03Rik
Hs6st3	Onecut2	0.943548387096774	0.997983870967742	59	wtNA	NA	wt	Hs6st3 Onecut2
Hs6st3	Fgd4	0.943548387096774	0.984543010752688	39	NAhd	NA	hd	Hs6st3 Fgd4
Hs6st3	Dpyd	0.951612903225806	0.915322580645161	39	NAhd	NA	hd	Hs6st3 Dpyd
Hs6st3	Slc8a1	0.951612903225806	0.962365591397849	59	wthd	NA	NA	Hs6st3 Slc8a1
Hs6st3	Itpr1	0.955645161290323	0.939516129032258	39	NAhd	NA	hd	Hs6st3 Itpr1
Hs6st3	Itga5	0.959677419354839	0.891129032258065	59	wtNA	NA	wt	Hs6st3 Itga5
Hs6st3	Gpm6b	0.959677419354839	0.977822580645161	59	wtNA	NA	wt	Hs6st3 Gpm6b
Hs6st3	Spock3	0.963709677419355	0.90994623655914	59	wtNA	NA	wt	Hs6st3 Spock3
Hs6st3	Rbms1	0.963709677419355	0.993951612903226	39	NAhd	NA	hd	Hs6st3 Rbms1
Hs6st3	Fam196b	0.967741935483871	0.934139784946237	59	wtNA	NA	NA	Hs6st3 Fam196b
Hs6st3	4930555F03Rik	0.971774193548387	1	59	wthd	NA	NA	Hs6st3 4930555F03Rik
Hs6st3	Actn1	0.975806451612903	0.967741935483871	59	wtNA	NA	wt	Hs6st3 Actn1
Hs6st3	Cdh13	0.975806451612903	1	59	wthd	NA	NA	Hs6st3 Cdh13
Hs6st3	Trpm3	0.975806451612903	0.931451612903226	39	NAhd	NA	NA	Hs6st3 Trpm3
Hs6st3	Mtcl1	0.983870967741935	0.967741935483871	59	wtNA	NA	wt	Hs6st3 Mtcl1
Hs6st3	Fam19a2	0.983870967741935	0.991935483870968	59	wtNA	NA	NA	Hs6st3 Fam19a2
Hs6st3	Zfp385b	0.983870967741935	0.922043010752688	39	NAhd	NA	NA	Hs6st3 Zfp385b
Hs6st3	Lrfn2	0.987903225806452	0.957661290322581	59	wtNA	NA	wt	Hs6st3 Lrfn2
Hs6st3	Gipc2	0.987903225806452	0.995967741935484	59	wtNA	NA	wt	Hs6st3 Gipc2
Hs6st3	Acvr1c	0.991935483870968	0.991935483870968	59	wtNA	NA	wt	Hs6st3 Acvr1c
Hs6st3	Epha5	0.991935483870968	0.979838709677419	59	wthd	NA	NA	Hs6st3 Epha5
Hs6st3	Grm1	0.991935483870968	0.969086021505376	59	wtNA	NA	wt	Hs6st3 Grm1
Hs6st3	Lynx1	0.991935483870968	0.815860215053763	59	wtNA	NA	wt	Hs6st3 Lynx1
Hs6st3	Adam12	0.995967741935484	0.963709677419355	59	wthd	NA	NA	Hs6st3 Adam12
Hs6st3	Synpo2	0.995967741935484	0.829301075268817	59	wthd	NA	NA	Hs6st3 Synpo2
Hs6st3	Ivns1abp	0.995967741935484	0.876344086021505	39	NAhd	NA	hd	Hs6st3 Ivns1abp
Hs6st3	Galnt14	1	0.919354838709677	59	wthd	NA	NA	Hs6st3 Galnt14
Hs6st3	Cnr1	1	0.985887096774194	39	NAhd	NA	NA	Hs6st3 Cnr1
Hs6st3	Col6a1	1	0.905241935483871	59	wtNA	NA	wt	Hs6st3 Col6a1
Hs6st3	Rgs7bp	1	0.917338709677419	59	wthd	NA	NA	Hs6st3 Rgs7bp
Hs6st3	Hap1	1	0.965725806451613	59	wthd	NA	NA	Hs6st3 Hap1
Hs6st3	Ank3	1	0.973790322580645	59	wtNA	NA	NA	Hs6st3 Ank3
Hs6st3	Atp2b1	1	0.931451612903226	59	wtNA	NA	wt	Hs6st3 Atp2b1
Hs6st3	Ntm	1	0.868951612903226	59	wthd	NA	NA	Hs6st3 Ntm
Hs6st3	Frmd4b	1	0.941532258064516	59	wthd	NA	NA	Hs6st3 Frmd4b
Hs6st3	Pde4d	1	0.929435483870968	59	wthd	NA	NA	Hs6st3 Pde4d
Hs6st3	Actn2	1	0.854838709677419	59	wthd	NA	NA	Hs6st3 Actn2
Hs6st3	Meis1	1	1	39	NAhd	NA	hd	Hs6st3 Meis1
Hs6st3	Srgap1	1	0.881048387096774	59	wthd	NA	NA	Hs6st3 Srgap1
Hs6st3	Prima1	1	0.971774193548387	59	wtNA	NA	wt	Hs6st3 Prima1
Hs6st3	Cdh9	1	0.832661290322581	59	wtNA	NA	wt	Hs6st3 Cdh9
Hs6st3	Plcb1	1	0.98991935483871	59	wthd	NA	NA	Hs6st3 Plcb1
Hs6st3	Mgat4c	1	1	59	wtNA	NA	NA	Hs6st3 Mgat4c
Hs6st3	Ldlrad4	1	0.973790322580645	59	wthd	NA	NA	Hs6st3 Ldlrad4
Hs6st3	Crym	1	0.921370967741935	59	wthd	NA	NA	Hs6st3 Crym
Hs6st3	Cntn4	1	0.995967741935484	59	wthd	NA	NA	Hs6st3 Cntn4
Hs6st3	Itga9	1	0.917338709677419	39	NAhd	NA	NA	Hs6st3 Itga9
Hs6st3	Khdrbs2	1	0.969758064516129	59	wtNA	NA	wt	Hs6st3 Khdrbs2
Hs6st3	Bcl11b	1	0.901209677419355	59	wtNA	NA	wt	Hs6st3 Bcl11b
Hs6st3	Pde10a	1	0.826612903225806	59	wthd	NA	NA	Hs6st3 Pde10a
Hs6st3	Pde1a	1	0.889112903225806	39	NAhd	NA	NA	Hs6st3 Pde1a
Hs6st3	RP23-231J2.1	1	0.872983870967742	59	wthd	NA	NA	Hs6st3 RP23-231J2.1
Htr4	A830036E02Rik	0.879032258064516	1	1	wtNA	NA	wt	Htr4 A830036E02Rik
Il1rapl2	Robo2	0.899193548387097	0.942204301075269	2	wtNA	NA	NA	Il1rapl2 Robo2
Il1rapl2	Pard3	0.911290322580645	1	2	wtNA	NA	wt	Il1rapl2 Pard3
Kcnab1	A730090N16Rik	0.987903225806452	1	2	wtNA	NA	wt	Kcnab1 A730090N16Rik
Kcnab1	A330015K06Rik	1	1	2	wthd	NA	NA	Kcnab1 A330015K06Rik
Kcnq5	Prkch	0.895161290322581	1	1	NAhd	NA	NA	Kcnq5 Prkch
Kctd8	Grm3	1	0.997983870967742	1	wtNA	wt	wt	Kctd8 Grm3
Khdrbs2	Kcnq5	0.94758064516129	0.995967741935484	2	wtNA	wt	NA	Khdrbs2 Kcnq5
Khdrbs2	Pde1c	0.951612903225806	0.981854838709677	2	wtNA	wt	NA	Khdrbs2 Pde1c
Ldlrad4	Kcnh1	0.931451612903226	1	1	wtNA	NA	NA	Ldlrad4 Kcnh1
Lsamp	Mgat4c	0.858870967741935	0.979838709677419	2	NAhd	NA	NA	Lsamp Mgat4c
Lsamp	Grm3	0.862903225806452	1	2	wtNA	NA	wt	Lsamp Grm3
Lsamp	Gpc6	0.931451612903226	0.75	2	NAhd	NA	NA	Lsamp Gpc6
Lsamp	Pcdh10	0.983870967741935	0.979166666666667	2	wtNA	NA	wt	Lsamp Pcdh10
Malat1	Rgs20	0.907258064516129	0.89247311827957	4	NAhd	NA	NA	Malat1 Rgs20
Malat1	Rbm39	0.963709677419355	0.995967741935484	4	NAhd	NA	NA	Malat1 Rbm39
Malat1	Leng8	0.983870967741935	0.995967741935484	4	NAhd	NA	hd	Malat1 Leng8
Malat1	Ddx5	1	0.995967741935484	4	NAhd	NA	NA	Malat1 Ddx5
Mctp1	Lrrtm3	0.850806451612903	1	1	wtNA	wt	wt	Mctp1 Lrrtm3
Meg3	Exoc6b	0.875	0.995295698924731	15	wtNA	wt	wt	Meg3 Exoc6b
Meg3	Eif4g3	0.879032258064516	0.997311827956989	15	wtNA	wt	wt	Meg3 Eif4g3
Meg3	Usp34	0.887096774193548	0.973118279569892	15	wtNA	wt	wt	Meg3 Usp34
Meg3	Cfap54	0.895161290322581	0.995967741935484	15	wtNA	wt	NA	Meg3 Cfap54
Meg3	4930402H24Rik	0.903225806451613	0.995967741935484	15	wtNA	wt	wt	Meg3 4930402H24Rik
Meg3	Arpp19	0.903225806451613	0.995967741935484	15	wtNA	wt	wt	Meg3 Arpp19
Meg3	Rtn3	0.911290322580645	0.967069892473118	15	wtNA	wt	wt	Meg3 Rtn3
Meg3	2410089E03Rik	0.911290322580645	0.969758064516129	15	wtNA	wt	wt	Meg3 2410089E03Rik
Meg3	Klhdc10	0.935483870967742	0.981182795698925	15	wtNA	wt	wt	Meg3 Klhdc10
Meg3	Tra2a	0.935483870967742	0.983870967741935	15	wtNA	wt	wt	Meg3 Tra2a
Meg3	Ube3a	0.943548387096774	0.979166666666667	15	wtNA	wt	wt	Meg3 Ube3a
Meg3	Elavl3	0.955645161290323	0.971774193548387	15	wtNA	wt	wt	Meg3 Elavl3
Meg3	Scaper	0.963709677419355	0.970430107526882	15	wtNA	wt	wt	Meg3 Scaper
Meg3	Rbm39	0.975806451612903	0.995967741935484	15	wtNA	wt	NA	Meg3 Rbm39
Meg3	Camk4	0.975806451612903	1	15	wtNA	wt	NA	Meg3 Camk4
Meis2	Caln1	0.943548387096774	1	6	NAhd	NA	hd	Meis2 Caln1
Meis2	Kirrel3	0.943548387096774	0.979838709677419	6	NAhd	NA	NA	Meis2 Kirrel3
Meis2	Fign	0.963709677419355	0.997983870967742	6	NAhd	NA	hd	Meis2 Fign
Meis2	Bcl11a	0.967741935483871	1	6	NAhd	NA	hd	Meis2 Bcl11a
Meis2	Esrrg	0.995967741935484	0.997983870967742	6	NAhd	NA	hd	Meis2 Esrrg
Meis2	Ust	1	1	1	wthd	NA	NA	Meis2 Ust
Necab1	Fam155a	1	0.995967741935484	1	wtNA	NA	NA	Necab1 Fam155a
Nlgn1	Aff2	0.854838709677419	1	3	wtNA	NA	NA	Nlgn1 Aff2
Nlgn1	Cacna2d3	0.858870967741935	0.826612903225806	3	wthd	NA	NA	Nlgn1 Cacna2d3
Nlgn1	Gpc6	0.959677419354839	0.69758064516129	2	NAhd	NA	NA	Nlgn1 Gpc6
Nlgn1	Sgk1	0.967741935483871	0.921370967741935	3	wtNA	NA	wt	Nlgn1 Sgk1
Npas3	Slc24a4	0.895161290322581	1	1	wtNA	wt	NA	Npas3 Slc24a4
Nrg1	Robo2	0.858870967741935	0.987903225806452	5	wtNA	NA	NA	Nrg1 Robo2
Nrg1	Camk2d	0.862903225806452	0.997983870967742	15	NAhd	NA	NA	Nrg1 Camk2d
Nrg1	Prkcb	0.866935483870968	1	15	NAhd	NA	hd	Nrg1 Prkcb
Nrg1	Npas3	0.875	0.994623655913978	5	wtNA	NA	wt	Nrg1 Npas3
Nrg1	Pde7b	0.879032258064516	0.991935483870968	15	NAhd	NA	NA	Nrg1 Pde7b
Nrg1	Ttc28	0.887096774193548	0.995295698924731	5	wthd	NA	NA	Nrg1 Ttc28
Nrg1	Ptprz1	0.891129032258065	0.971102150537635	15	NAhd	NA	NA	Nrg1 Ptprz1
Nrg1	Pcdh15	0.903225806451613	0.980510752688172	15	NAhd	NA	NA	Nrg1 Pcdh15
Nrg1	Pde1b	0.919354838709677	0.997311827956989	15	NAhd	NA	hd	Nrg1 Pde1b
Nrg1	Olfm3	0.92741935483871	0.977150537634409	15	NAhd	NA	hd	Nrg1 Olfm3
Nrg1	Mpp7	0.931451612903226	0.987231182795699	15	NAhd	NA	hd	Nrg1 Mpp7
Nrg1	Dclk1	0.935483870967742	0.995967741935484	15	NAhd	NA	NA	Nrg1 Dclk1
Nrg1	Robo1	0.959677419354839	0.995967741935484	15	NAhd	NA	hd	Nrg1 Robo1
Nrg1	Ano2	0.971774193548387	1	5	wtNA	NA	wt	Nrg1 Ano2
Nrg1	Ppp3ca	0.975806451612903	0.969758064516129	5	wthd	NA	NA	Nrg1 Ppp3ca
Nrg1	Dach1	0.975806451612903	0.61491935483871	15	NAhd	NA	NA	Nrg1 Dach1
Nrg1	Cpne4	0.995967741935484	0.993951612903226	15	NAhd	NA	hd	Nrg1 Cpne4
Nrg1	Ablim2	1	0.979838709677419	15	NAhd	NA	hd	Nrg1 Ablim2
Nrg3	RP24-134N2.1	0.858870967741935	1	4	wtNA	NA	wt	Nrg3 RP24-134N2.1
Nrg3	Slc24a2	0.883064516129032	1	4	wtNA	NA	NA	Nrg3 Slc24a2
Nrg3	Sema6d	0.895161290322581	0.997983870967742	11	NAhd	NA	hd	Nrg3 Sema6d
Nrg3	Nrxn1	0.907258064516129	0.985887096774194	11	NAhd	NA	NA	Nrg3 Nrxn1
Nrg3	Nell1	0.915322580645161	0.997983870967742	11	NAhd	NA	NA	Nrg3 Nell1
Nrg3	Adora2a	0.967741935483871	0.88239247311828	11	NAhd	NA	NA	Nrg3 Adora2a
Nrg3	Cntnap2	0.967741935483871	1	11	NAhd	NA	NA	Nrg3 Cntnap2
Nrg3	Erbb4	1	0.975806451612903	11	NAhd	NA	NA	Nrg3 Erbb4
Nrg3	Oprd1	1	0.993951612903226	11	NAhd	NA	NA	Nrg3 Oprd1
Nrg3	Sgcz	1	0.965725806451613	4	wthd	NA	NA	Nrg3 Sgcz
Nrg3	Foxp2	1	0.798387096774194	11	NAhd	NA	NA	Nrg3 Foxp2
Nrg3	Tac1	1	0.951612903225806	4	wthd	NA	NA	Nrg3 Tac1
Nrg3	Penk	1	0.993951612903226	11	NAhd	NA	NA	Nrg3 Penk
Nrxn1	Ptprz1	0.870967741935484	0.989247311827957	1	wtNA	NA	NA	Nrxn1 Ptprz1
Ntm	Egfem1	0.870967741935484	0.889784946236559	6	NAhd	NA	hd	Ntm Egfem1
Ntm	Anks1b	0.903225806451613	1	7	wtNA	NA	wt	Ntm Anks1b
Ntm	Cdh4	0.907258064516129	1	6	NAhd	NA	hd	Ntm Cdh4
Ntm	Sorcs2	0.915322580645161	0.897849462365591	7	wthd	NA	NA	Ntm Sorcs2
Ntm	Lsamp	0.935483870967742	0.753360215053763	7	wthd	NA	NA	Ntm Lsamp
Ntm	Sema3a	0.967741935483871	0.926747311827957	6	NAhd	NA	hd	Ntm Sema3a
Ntm	6530403H02Rik	0.967741935483871	1	7	wthd	NA	NA	Ntm 6530403H02Rik
Ntm	Tenm1	0.975806451612903	1	7	wtNA	NA	NA	Ntm Tenm1
Ntm	Pde1a	0.979838709677419	0.535618279569892	7	wtNA	NA	NA	Ntm Pde1a
Ntm	Cntn5	1	0.987903225806452	7	wtNA	NA	NA	Ntm Cntn5
Opcml	Gm20754	1	0.983870967741935	1	wtNA	NA	NA	Opcml Gm20754
Pbx3	C79798	1	0.995967741935484	1	wthd	NA	NA	Pbx3 C79798
Pcdh15	Tbc1d4	0.858870967741935	1	10	NAhd	NA	hd	Pcdh15 Tbc1d4
Pcdh15	Meis2	0.879032258064516	0.991935483870968	10	NAhd	NA	NA	Pcdh15 Meis2
Pcdh15	Dpp10	0.887096774193548	1	10	NAhd	NA	NA	Pcdh15 Dpp10
Pcdh15	Shisa9	0.915322580645161	1	5	wtNA	NA	wt	Pcdh15 Shisa9
Pcdh15	Tcf4	0.935483870967742	1	5	wthd	NA	NA	Pcdh15 Tcf4
Pcdh15	Ank2	0.935483870967742	0.94758064516129	5	wtNA	NA	wt	Pcdh15 Ank2
Pcdh15	Kcnip3	0.955645161290323	1	5	wthd	NA	NA	Pcdh15 Kcnip3
Pcdh15	Zfhx3	0.959677419354839	0.963709677419355	10	NAhd	NA	NA	Pcdh15 Zfhx3
Pcdh15	Aff2	0.967741935483871	1	10	NAhd	NA	NA	Pcdh15 Aff2
Pcdh15	Lmo7	0.971774193548387	0.997983870967742	10	NAhd	NA	hd	Pcdh15 Lmo7
Pcdh15	D430036J16Rik	0.971774193548387	0.997983870967742	10	NAhd	NA	hd	Pcdh15 D430036J16Rik
Pcdh15	Ccser1	1	0.991935483870968	5	wthd	NA	NA	Pcdh15 Ccser1
Pcdh9	Cdh4	0.907258064516129	0.860215053763441	1	NAhd	NA	hd	Pcdh9 Cdh4
Pde10a	Cacna1c	0.850806451612903	1	6	wtNA	NA	wt	Pde10a Cacna1c
Pde10a	Gprin3	0.866935483870968	0.995967741935484	6	wtNA	NA	NA	Pde10a Gprin3
Pde10a	Slit3	0.907258064516129	0.995967741935484	6	wtNA	NA	NA	Pde10a Slit3
Pde10a	Inf2	0.94758064516129	0.910618279569892	6	wtNA	NA	NA	Pde10a Inf2
Pde10a	Rgs9	0.963709677419355	0.889112903225807	6	wtNA	NA	wt	Pde10a Rgs9
Pde10a	Meg3	1	0.967741935483871	6	wtNA	NA	wt	Pde10a Meg3
Pde1a	Zswim6	0.858870967741935	1	4	NAhd	NA	hd	Pde1a Zswim6
Pde1a	Slc4a4	0.891129032258065	0.881720430107527	4	NAhd	NA	hd	Pde1a Slc4a4
Pde1a	S100pbp	0.915322580645161	0.895833333333333	4	NAhd	NA	hd	Pde1a S100pbp
Pde1a	Hcn1	0.931451612903226	1	1	wtNA	NA	wt	Pde1a Hcn1
Pde1a	Pde4d	0.987903225806452	0.638440860215054	4	NAhd	NA	NA	Pde1a Pde4d
Pde1c	Npas2	0.987903225806452	0.970430107526882	1	NAhd	NA	hd	Pde1c Npas2
Pde4d	Epha5	0.850806451612903	0.903897849462366	6	NAhd	NA	NA	Pde4d Epha5
Pde4d	Epb41l4b	0.858870967741935	1	4	wtNA	NA	wt	Pde4d Epb41l4b
Pde4d	Gnas	0.866935483870968	1	6	NAhd	NA	hd	Pde4d Gnas
Pde4d	Gm15155	0.891129032258065	0.984543010752688	4	wthd	NA	NA	Pde4d Gm15155
Pde4d	Cplx2	0.899193548387097	0.898521505376344	6	NAhd	NA	hd	Pde4d Cplx2
Pde4d	Myo1b	0.911290322580645	0.899865591397849	6	NAhd	NA	NA	Pde4d Myo1b
Pde4d	Mgat5b	0.923387096774194	0.911290322580645	6	NAhd	NA	hd	Pde4d Mgat5b
Pde4d	Ppfia2	0.939516129032258	0.991263440860215	4	wtNA	NA	wt	Pde4d Ppfia2
Pde4d	Gm28905	0.94758064516129	1	4	wtNA	NA	wt	Pde4d Gm28905
Pde7b	Wipf3	0.891129032258065	1	3	wtNA	NA	wt	Pde7b Wipf3
Pde7b	Rgs20	0.991935483870968	1	3	wtNA	NA	NA	Pde7b Rgs20
Pde7b	Zdhhc14	1	0.671370967741935	3	wtNA	NA	wt	Pde7b Zdhhc14
Pdzd2	Myt1l	0.987903225806452	0.997983870967742	2	wtNA	NA	NA	Pdzd2 Myt1l
Pdzd2	Dpy19l3	0.995967741935484	0.991935483870968	2	wtNA	NA	wt	Pdzd2 Dpy19l3
Phactr1	Gad1	0.850806451612903	0.994623655913979	34	NAhd	NA	hd	Phactr1 Gad1
Phactr1	Osbp2	0.866935483870968	1	34	NAhd	NA	hd	Phactr1 Osbp2
Phactr1	Gsg1l	0.870967741935484	1	34	NAhd	NA	hd	Phactr1 Gsg1l
Phactr1	Gprin3	0.883064516129032	1	34	NAhd	NA	NA	Phactr1 Gprin3
Phactr1	Garem	0.891129032258065	0.990591397849462	34	NAhd	NA	hd	Phactr1 Garem
Phactr1	Pde2a	0.891129032258065	0.983870967741936	34	NAhd	NA	hd	Phactr1 Pde2a
Phactr1	Pde7b	0.895161290322581	0.967741935483871	34	NAhd	NA	NA	Phactr1 Pde7b
Phactr1	2010300C02Rik	0.895161290322581	0.989247311827957	34	NAhd	NA	hd	Phactr1 2010300C02Rik
Phactr1	Gpr158	0.895161290322581	1	7	wthd	NA	NA	Phactr1 Gpr158
Phactr1	Zswim6	0.903225806451613	1	34	NAhd	NA	hd	Phactr1 Zswim6
Phactr1	Brinp3	0.907258064516129	0.971774193548387	7	wtNA	NA	NA	Phactr1 Brinp3
Phactr1	Adcy5	0.907258064516129	0.997983870967742	34	NAhd	NA	hd	Phactr1 Adcy5
Phactr1	Epb41	0.923387096774194	1	34	NAhd	NA	hd	Phactr1 Epb41
Phactr1	Dlgap3	0.923387096774194	1	34	NAhd	NA	hd	Phactr1 Dlgap3
Phactr1	Gabra4	0.931451612903226	1	34	NAhd	NA	hd	Phactr1 Gabra4
Phactr1	Sv2c	0.939516129032258	1	34	NAhd	NA	hd	Phactr1 Sv2c
Phactr1	Ypel2	0.94758064516129	0.995967741935484	34	NAhd	NA	hd	Phactr1 Ypel2
Phactr1	Gm13052	0.94758064516129	1	7	wthd	NA	NA	Phactr1 Gm13052
Phactr1	Dgkb	0.959677419354839	0.864247311827957	7	wthd	NA	NA	Phactr1 Dgkb
Phactr1	Celf2	0.967741935483871	1	34	NAhd	NA	hd	Phactr1 Celf2
Phactr1	Myt1l	0.975806451612903	1	34	NAhd	NA	NA	Phactr1 Myt1l
Phactr1	Slc24a4	0.975806451612903	1	34	NAhd	NA	NA	Phactr1 Slc24a4
Phactr1	Camkk2	0.979838709677419	0.997983870967742	34	NAhd	NA	hd	Phactr1 Camkk2
Phactr1	Rasgrf2	0.979838709677419	1	34	NAhd	NA	hd	Phactr1 Rasgrf2
Phactr1	Cnksr2	0.987903225806452	1	34	NAhd	NA	hd	Phactr1 Cnksr2
Phactr1	Lrrc7	0.987903225806452	0.983870967741935	34	NAhd	NA	hd	Phactr1 Lrrc7
Phactr1	Slit3	0.991935483870968	0.762768817204301	7	wthd	NA	NA	Phactr1 Slit3
Phactr1	Ank3	0.991935483870968	0.993951612903226	34	NAhd	NA	NA	Phactr1 Ank3
Phactr1	Erc2	0.995967741935484	0.995967741935484	34	NAhd	NA	hd	Phactr1 Erc2
Phactr1	A830082K12Rik	0.995967741935484	0.987903225806452	34	NAhd	NA	hd	Phactr1 A830082K12Rik
Phactr1	Malat1	0.995967741935484	0.995967741935484	34	NAhd	NA	NA	Phactr1 Malat1
Phactr1	Pde10a	1	0.671370967741935	34	NAhd	NA	NA	Phactr1 Pde10a
Phactr1	Gm15810	1	1	7	wthd	NA	NA	Phactr1 Gm15810
Phactr1	Syt6	1	0.997983870967742	34	NAhd	NA	hd	Phactr1 Syt6
Phactr1	Rnf150	1	1	7	wthd	NA	NA	Phactr1 Rnf150
Pifo	Gm42722	1	0.997983870967742	1	wthd	NA	NA	Pifo Gm42722
PISD	Hjurp	1	0.979838709677419	1	NAhd	NA	hd	PISD Hjurp
Plcb1	Plppr1	0.862903225806452	1	3	wtNA	NA	wt	Plcb1 Plppr1
Plcb1	Sorbs2	0.963709677419355	1	3	wtNA	NA	NA	Plcb1 Sorbs2
Plcb1	9630028H03Rik	0.963709677419355	0.991935483870968	3	wthd	NA	NA	Plcb1 9630028H03Rik
Ptpn5	Camk2b	0.995967741935484	0.991935483870968	1	NAhd	hd	hd	Ptpn5 Camk2b
Reln	Nrg1	0.891129032258065	0.71505376344086	7	wthd	NA	NA	Reln Nrg1
Reln	Hs3st5	0.943548387096774	1	7	wtNA	NA	wt	Reln Hs3st5
Reln	Il1rapl2	0.963709677419355	0.94758064516129	7	wtNA	NA	NA	Reln Il1rapl2
Reln	Gpr149	0.975806451612903	1	7	wthd	NA	NA	Reln Gpr149
Reln	Pcdh15	0.983870967741935	0.962365591397849	5	NAhd	NA	NA	Reln Pcdh15
Reln	Ralyl	0.983870967741935	1	5	NAhd	NA	hd	Reln Ralyl
Reln	Dpp10	0.987903225806452	1	7	wtNA	NA	NA	Reln Dpp10
Reln	Fam19a2	0.991935483870968	0.896505376344086	7	wtNA	NA	NA	Reln Fam19a2
Reln	Pbx3	1	0.995967741935484	7	wthd	NA	NA	Reln Pbx3
Rnf150	Clvs1	0.891129032258065	0.979838709677419	1	wtNA	NA	wt	Rnf150 Clvs1
RP23-231J2.1	Grik2	0.870967741935484	0.997983870967742	4	NAhd	NA	NA	RP23-231J2.1 Grik2
RP23-231J2.1	Sema3e	0.951612903225806	0.977822580645161	4	NAhd	NA	hd	RP23-231J2.1 Sema3e
RP23-231J2.1	Gulp1	0.995967741935484	0.995967741935484	4	NAhd	NA	NA	RP23-231J2.1 Gulp1
RP23-231J2.1	Grin2a	1	1	4	NAhd	NA	hd	RP23-231J2.1 Grin2a
Sema5b	Gulp1	0.923387096774194	0.978494623655914	3	wtNA	NA	NA	Sema5b Gulp1
Sema5b	Cntnap2	0.931451612903226	0.81989247311828	3	wtNA	NA	NA	Sema5b Cntnap2
Sema5b	Efna5	0.991935483870968	1	3	wtNA	NA	wt	Sema5b Efna5
Sgcz	Strip2	0.866935483870968	0.993279569892473	4	wtNA	NA	wt	Sgcz Strip2
Sgcz	Gucy1a3	0.903225806451613	1	3	NAhd	NA	hd	Sgcz Gucy1a3
Sgcz	Brinp3	0.975806451612903	0.997983870967742	4	wthd	NA	NA	Sgcz Brinp3
Sgcz	Col25a1	0.983870967741935	0.995967741935484	4	wtNA	NA	wt	Sgcz Col25a1
Sgcz	Cdh18	1	0.997983870967742	4	wthd	NA	NA	Sgcz Cdh18
Sgk1	Camk1d	0.975806451612903	1	1	wtNA	wt	wt	Sgk1 Camk1d
Slc24a2	Thsd7a	0.943548387096774	0.913978494623656	1	NAhd	NA	NA	Slc24a2 Thsd7a
Slc8a1	Gabrd	0.915322580645161	0.98252688172043	3	wtNA	NA	wt	Slc8a1 Gabrd
Slc8a1	Myo1b	0.923387096774194	0.968413978494624	3	wtNA	NA	NA	Slc8a1 Myo1b
Slc8a1	Nrg1	0.931451612903226	0.811827956989247	3	wthd	NA	NA	Slc8a1 Nrg1
Snhg11	Rap1gapos	0.854838709677419	1	2	wtNA	NA	wt	Snhg11 Rap1gapos
Snhg11	4930578G10Rik	1	1	1	NAhd	NA	hd	Snhg11 4930578G10Rik
Snhg11	PISD	1	0.754032258064516	2	wtNA	NA	NA	Snhg11 PISD
Sorbs2	Sorbs2os	0.987903225806452	1	1	wthd	NA	NA	Sorbs2 Sorbs2os
Spock3	Nrg1	0.875	0.895161290322581	6	wtNA	wt	NA	Spock3 Nrg1
Spock3	Pard3	0.887096774193548	1	6	wtNA	wt	wt	Spock3 Pard3
Spock3	Pde8b	0.911290322580645	0.952956989247312	6	wtNA	wt	wt	Spock3 Pde8b
Spock3	Tiam1	0.975806451612903	1	6	wtNA	wt	wt	Spock3 Tiam1
Spock3	Camk2d	0.983870967741935	1	6	wtNA	wt	NA	Spock3 Camk2d
Spock3	Dach1	0.995967741935484	0.612231182795699	6	wtNA	wt	NA	Spock3 Dach1
Tenm2	Egfem1	0.866935483870968	0.932795698924731	5	NAhd	NA	hd	Tenm2 Egfem1
Tenm2	Pdzrn4	0.883064516129032	0.994623655913978	6	wthd	NA	NA	Tenm2 Pdzrn4
Tenm2	Rbfox1	0.891129032258065	0.631720430107527	6	wtNA	NA	wt	Tenm2 Rbfox1
Tenm2	Dgkh	0.931451612903226	1	5	NAhd	NA	hd	Tenm2 Dgkh
Tenm2	Foxp2	0.935483870967742	0.666666666666667	6	wtNA	NA	NA	Tenm2 Foxp2
Tenm2	Klhl29	0.939516129032258	1	6	wthd	NA	NA	Tenm2 Klhl29
Tenm2	Gli3	0.955645161290323	0.962365591397849	6	wtNA	NA	NA	Tenm2 Gli3
Tenm2	Tenm3	1	1	6	wthd	NA	NA	Tenm2 Tenm3
Thsd7a	Agbl4	0.935483870967742	1	1	wtNA	NA	NA	Thsd7a Agbl4
Trpm3	Stxbp6	1	0.995967741935484	1	wtNA	NA	wt	Trpm3 Stxbp6
Vsnl1	Elavl2	0.854838709677419	1	1	NAhd	hd	hd	Vsnl1 Elavl2
Ywhae	Gm26836	1	0.915322580645161	1	wtNA	wt	NA	Ywhae Gm26836
Zdhhc14	Sesn3	0.939516129032258	0.997983870967742	4	wtNA	wt	wt	Zdhhc14 Sesn3
Zdhhc14	Nebl	0.971774193548387	0.916666666666667	4	wtNA	wt	wt	Zdhhc14 Nebl
Zdhhc14	Nyap2	0.983870967741935	1	4	wtNA	wt	wt	Zdhhc14 Nyap2
Zdhhc14	Slc2a13	1	0.542338709677419	4	wtNA	wt	NA	Zdhhc14 Slc2a13
Zfp385b	Gm13944	0.987903225806452	0.981182795698925	1	wtNA	NA	wt	Zfp385b Gm13944
Zfp804a	Gabrg3	0.94758064516129	1	1	wtNA	NA	NA	Zfp804a Gabrg3

## Sheet: Blue_OL bnet
from.x	to.x	strength.x	direction.x	degree.out	condcat	uninode	uninode	edgename
Acaca	Gm11437	1	0.967741935483871	1	wthd	NA	NA	Acaca Gm11437
Adam23	Dync1i1	0.915322580645161	0.854838709677419	1	wtNA	NA	wt	Adam23 Dync1i1
Adam23	Gls	1	0.929435483870968	2	NAhd	NA	NA	Adam23 Gls
Adam23	Scmh1	0.850806451612903	0.948252688172043	2	NAhd	NA	hd	Adam23 Scmh1
Adcy5	Galnt13	0.931451612903226	0.932795698924731	2	NAhd	NA	NA	Adcy5 Galnt13
Adcy5	Pcdh15	0.891129032258065	0.971774193548387	2	wtNA	NA	wt	Adcy5 Pcdh15
Adcy5	Sgk1	0.987903225806452	0.931451612903226	2	wthd	NA	NA	Adcy5 Sgk1
Adipor2	Zbtb16	1	0.745967741935484	1	wtNA	wt	wt	Adipor2 Zbtb16
Akt3	Pcdh10	0.995967741935484	0.803091397849462	1	wtNA	wt	wt	Akt3 Pcdh10
Araf	Tox	0.995967741935484	0.553763440860215	1	wtNA	wt	wt	Araf Tox
Arhgap26	C130071C03Rik	0.971774193548387	0.797715053763441	3	wtNA	NA	NA	Arhgap26 C130071C03Rik
Arhgap26	Fgf1	0.907258064516129	0.895161290322581	1	NAhd	NA	hd	Arhgap26 Fgf1
Arhgap26	Rapgef2	0.931451612903226	0.981854838709677	3	wtNA	NA	wt	Arhgap26 Rapgef2
Arhgap26	Sybu	0.975806451612903	0.921370967741935	3	wtNA	NA	wt	Arhgap26 Sybu
Arl15	Sec61a2	0.911290322580645	0.970430107526882	1	wtNA	wt	wt	Arl15 Sec61a2
Arsb	A930015D03Rik	0.92741935483871	1	3	wtNA	wt	wt	Arsb A930015D03Rik
Arsb	Fam120c	0.854838709677419	0.940860215053763	3	wtNA	wt	wt	Arsb Fam120c
Arsb	Grik4	0.979838709677419	0.983870967741935	3	wtNA	wt	wt	Arsb Grik4
Atxn7l1	Cdh11	1	0.883064516129032	5	wthd	NA	NA	Atxn7l1 Cdh11
Atxn7l1	Fyn	0.971774193548387	0.874327956989247	5	wtNA	NA	NA	Atxn7l1 Fyn
Atxn7l1	Pcca	1	0.969758064516129	5	wthd	NA	NA	Atxn7l1 Pcca
Atxn7l1	Pcdh7	0.939516129032258	0.53494623655914	5	wtNA	NA	NA	Atxn7l1 Pcdh7
Atxn7l1	RP24-127M20.8	0.995967741935484	0.963709677419355	5	wthd	NA	NA	Atxn7l1 RP24-127M20.8
C130071C03Rik	Cdh2	0.850806451612903	0.987231182795699	1	wtNA	NA	wt	C130071C03Rik Cdh2
C130071C03Rik	Syn3	1	0.917338709677419	1	NAhd	NA	NA	C130071C03Rik Syn3
Cacna1c	Arhgap39	0.995967741935484	0.913306451612903	9	NAhd	NA	hd	Cacna1c Arhgap39
Cacna1c	Atxn7l1	0.995967741935484	0.785618279569892	9	NAhd	NA	NA	Cacna1c Atxn7l1
Cacna1c	Fyn	0.979838709677419	0.941532258064516	9	NAhd	NA	NA	Cacna1c Fyn
Cacna1c	Large	0.94758064516129	0.965725806451613	9	NAhd	NA	NA	Cacna1c Large
Cacna1c	Pcdh7	1	0.957661290322581	9	NAhd	NA	NA	Cacna1c Pcdh7
Cacna1c	Ppm1h	0.995967741935484	0.930779569892473	9	NAhd	NA	NA	Cacna1c Ppm1h
Cacna1c	Ppm1l	1	0.959677419354839	9	NAhd	NA	hd	Cacna1c Ppm1l
Cacna1c	Ptpn4	0.911290322580645	0.637768817204301	9	NAhd	NA	NA	Cacna1c Ptpn4
Cacna1c	Tenm2	0.987903225806452	0.878360215053763	9	NAhd	NA	hd	Cacna1c Tenm2
Cadps	Vwa8	0.951612903225806	0.75739247311828	1	wtNA	wt	NA	Cadps Vwa8
Camk2d	Atp9a	0.995967741935484	0.961693548387097	6	wtNA	wt	wt	Camk2d Atp9a
Camk2d	Atxn7l1	0.875	0.637768817204301	6	wtNA	wt	NA	Camk2d Atxn7l1
Camk2d	Lncpint	1	0.979838709677419	6	wtNA	wt	NA	Camk2d Lncpint
Camk2d	Negr1	1	0.935483870967742	6	wtNA	wt	wt	Camk2d Negr1
Camk2d	Pcdh7	0.963709677419355	0.600134408602151	6	wtNA	wt	NA	Camk2d Pcdh7
Camk2d	Tnik	1	0.94758064516129	6	wtNA	wt	NA	Camk2d Tnik
Ccser1	Fchsd2	1	0.67741935483871	1	wtNA	NA	wt	Ccser1 Fchsd2
Cdh11	Cadps	1	0.875	4	wtNA	NA	wt	Cdh11 Cadps
Cdh11	Pcca	0.899193548387097	0.965725806451613	4	wtNA	NA	NA	Cdh11 Pcca
Cdh11	Vwa8	0.967741935483871	0.961021505376344	4	wtNA	NA	NA	Cdh11 Vwa8
Cdh11	Zfp462	0.919354838709677	0.955645161290323	4	wtNA	NA	wt	Cdh11 Zfp462
Chd9	Gls	0.963709677419355	0.600806451612903	1	wtNA	wt	NA	Chd9 Gls
Csmd1	Lsamp	0.854838709677419	0.99260752688172	2	NAhd	NA	hd	Csmd1 Lsamp
Csmd1	Prr5l	0.866935483870968	0.977822580645161	2	NAhd	NA	NA	Csmd1 Prr5l
Ddhd2	Cacna2d1	0.955645161290323	0.663978494623656	3	wthd	NA	NA	Ddhd2 Cacna2d1
Ddhd2	Rapgef1	0.875	0.90994623655914	3	wtNA	NA	wt	Ddhd2 Rapgef1
Ddhd2	Taf15	0.915322580645161	0.926747311827957	3	wthd	NA	NA	Ddhd2 Taf15
Dgki	Nckap5	0.92741935483871	1	1	wtNA	NA	NA	Dgki Nckap5
Enpp6	Kirrel3	1	0.725806451612903	3	wtNA	NA	NA	Enpp6 Kirrel3
Enpp6	Mob3b	0.875	0.887768817204301	3	wtNA	NA	wt	Enpp6 Mob3b
Enpp6	Ptgds	0.995967741935484	0.547043010752688	3	wtNA	NA	wt	Enpp6 Ptgds
Esyt2	Jarid2	0.891129032258065	0.957661290322581	3	NAhd	hd	hd	Esyt2 Jarid2
Esyt2	Ppfia2	0.971774193548387	0.963709677419355	3	NAhd	hd	hd	Esyt2 Ppfia2
Esyt2	Zfp950	0.991935483870968	0.814516129032258	3	NAhd	hd	NA	Esyt2 Zfp950
Fchsd2	Arid4b	0.943548387096774	0.925403225806452	12	wtNA	wt	wt	Fchsd2 Arid4b
Fchsd2	Atp6v0a1	0.959677419354839	0.983870967741935	12	wtNA	wt	wt	Fchsd2 Atp6v0a1
Fchsd2	Ccnl2	0.883064516129032	0.915322580645161	12	wtNA	wt	wt	Fchsd2 Ccnl2
Fchsd2	Dennd4a	0.991935483870968	0.819220430107527	12	wtNA	wt	wt	Fchsd2 Dennd4a
Fchsd2	Dmd	1	0.917338709677419	12	wtNA	wt	NA	Fchsd2 Dmd
Fchsd2	Frmd4a	0.939516129032258	0.923387096774194	12	wtNA	wt	NA	Fchsd2 Frmd4a
Fchsd2	Gramd1b	1	0.911290322580645	12	wtNA	wt	NA	Fchsd2 Gramd1b
Fchsd2	Macf1	1	0.913306451612903	12	wtNA	wt	NA	Fchsd2 Macf1
Fchsd2	Nav3	0.991935483870968	0.920698924731183	12	wtNA	wt	NA	Fchsd2 Nav3
Fchsd2	Nrg3	0.991935483870968	0.959677419354839	12	wtNA	wt	NA	Fchsd2 Nrg3
Fchsd2	Syn3	1	0.889112903225806	12	wtNA	wt	NA	Fchsd2 Syn3
Fchsd2	Xkr4	1	0.929435483870968	12	wtNA	wt	NA	Fchsd2 Xkr4
Fgf14	Sox10	0.862903225806452	0.993951612903226	1	NAhd	NA	hd	Fgf14 Sox10
Fhit	Sobp	1	0.951612903225806	1	wtNA	wt	wt	Fhit Sobp
Fnbp1	Aspa	0.971774193548387	0.953629032258065	5	NAhd	hd	hd	Fnbp1 Aspa
Fnbp1	Kcnk13	0.915322580645161	0.958333333333333	5	NAhd	hd	hd	Fnbp1 Kcnk13
Fnbp1	Nckap5	0.870967741935484	0.969758064516129	5	NAhd	hd	NA	Fnbp1 Nckap5
Fnbp1	Phlpp1	0.862903225806452	0.950268817204301	5	NAhd	hd	hd	Fnbp1 Phlpp1
Fnbp1	Qk	1	0.975806451612903	5	NAhd	hd	hd	Fnbp1 Qk
Frmd4a	Gsk3b	0.995967741935484	0.790322580645161	1	wtNA	NA	NA	Frmd4a Gsk3b
Galnt13	Dnm2	0.987903225806452	0.995967741935484	3	NAhd	NA	hd	Galnt13 Dnm2
Galnt13	Mboat2	0.895161290322581	1	3	NAhd	NA	hd	Galnt13 Mboat2
Galnt13	Rab30	0.879032258064516	0.522849462365591	3	NAhd	NA	NA	Galnt13 Rab30
Gls	Asap1	0.991935483870968	0.695564516129032	1	wtNA	NA	wt	Gls Asap1
Gm16168	Pacrg	1	0.57258064516129	1	wtNA	NA	NA	Gm16168 Pacrg
Gm16599	Tjp1	0.899193548387097	0.979838709677419	1	wtNA	NA	wt	Gm16599 Tjp1
Gm20754	Auts2	0.983870967741935	0.981182795698925	6	wtNA	wt	wt	Gm20754 Auts2
Gm20754	Fhit	1	0.891129032258065	6	wtNA	wt	wt	Gm20754 Fhit
Gm20754	Nr3c2	0.995967741935484	0.979838709677419	6	wtNA	wt	wt	Gm20754 Nr3c2
Gm20754	Ppm1h	0.967741935483871	0.745967741935484	6	wtNA	wt	NA	Gm20754 Ppm1h
Gm20754	Sobp	1	0.957661290322581	6	wtNA	wt	wt	Gm20754 Sobp
Gm20754	Tln2	1	0.997983870967742	6	wtNA	wt	wt	Gm20754 Tln2
Gramd1b	Jakmip2	1	0.88508064516129	1	NAhd	NA	hd	Gramd1b Jakmip2
Grm5	Ttc19	0.959677419354839	0.50739247311828	1	NAhd	NA	NA	Grm5 Ttc19
Jakmip2	Arhgef12	0.862903225806452	0.932123655913979	7	NAhd	hd	hd	Jakmip2 Arhgef12
Jakmip2	Ccser1	0.975806451612903	0.968413978494624	7	NAhd	hd	NA	Jakmip2 Ccser1
Jakmip2	Dmd	0.955645161290323	0.970430107526882	7	NAhd	hd	NA	Jakmip2 Dmd
Jakmip2	Gsk3b	0.870967741935484	0.977822580645161	7	NAhd	hd	NA	Jakmip2 Gsk3b
Jakmip2	Kat6b	0.963709677419355	0.612231182795699	7	NAhd	hd	NA	Jakmip2 Kat6b
Jakmip2	Macf1	0.959677419354839	0.971774193548387	7	NAhd	hd	NA	Jakmip2 Macf1
Jakmip2	Xkr4	0.963709677419355	0.962365591397849	7	NAhd	hd	NA	Jakmip2 Xkr4
Kat6b	Arhgef12	1	0.872983870967742	4	NAhd	NA	hd	Kat6b Arhgef12
Kat6b	Atp2c1	0.92741935483871	0.98252688172043	4	NAhd	NA	hd	Kat6b Atp2c1
Kat6b	Elmod2	0.935483870967742	0.984543010752688	4	NAhd	NA	hd	Kat6b Elmod2
Kat6b	Gsk3b	1	0.977822580645161	4	NAhd	NA	NA	Kat6b Gsk3b
Kcnab1	A330015K06Rik	1	0.897177419354839	1	wthd	NA	NA	Kcnab1 A330015K06Rik
Kcnip4	Fgf14	0.899193548387097	0.615591397849462	1	NAhd	hd	NA	Kcnip4 Fgf14
Kcnq1	Pak3	0.854838709677419	0.676075268817204	1	NAhd	NA	NA	Kcnq1 Pak3
Kcnq1ot1	Kcnq1	0.875	0.788978494623656	1	NAhd	NA	NA	Kcnq1ot1 Kcnq1
Kirrel3	Agmo	0.919354838709677	1	7	wtNA	NA	wt	Kirrel3 Agmo
Kirrel3	Anln	1	0.735887096774194	7	wthd	NA	NA	Kirrel3 Anln
Kirrel3	Cntn3	0.895161290322581	0.754704301075269	11	NAhd	NA	hd	Kirrel3 Cntn3
Kirrel3	Ctnna2	0.991935483870968	0.807795698924731	11	NAhd	NA	hd	Kirrel3 Ctnna2
Kirrel3	Ctnna3	0.951612903225806	1	7	wtNA	NA	wt	Kirrel3 Ctnna3
Kirrel3	Dgki	0.895161290322581	0.995967741935484	11	NAhd	NA	NA	Kirrel3 Dgki
Kirrel3	Enpp6	1	0.774193548387097	11	NAhd	NA	NA	Kirrel3 Enpp6
Kirrel3	Fam13c	0.967741935483871	0.9375	11	NAhd	NA	NA	Kirrel3 Fam13c
Kirrel3	Myo18a	0.987903225806452	0.935483870967742	11	NAhd	NA	hd	Kirrel3 Myo18a
Kirrel3	Sema5a	0.862903225806452	0.987903225806452	7	wthd	NA	NA	Kirrel3 Sema5a
Kirrel3	Slc13a1	0.891129032258065	0.997983870967742	7	wthd	NA	NA	Kirrel3 Slc13a1
Kirrel3	Srgap1	0.975806451612903	0.942876344086022	11	NAhd	NA	hd	Kirrel3 Srgap1
Kirrel3	Synpr	1	0.997983870967742	7	wthd	NA	NA	Kirrel3 Synpr
Kirrel3	Zdhhc20	0.923387096774194	1	7	wtNA	NA	wt	Kirrel3 Zdhhc20
Ldlrad4	Cacna1c	0.959677419354839	0.600134408602151	1	NAhd	hd	NA	Ldlrad4 Cacna1c
Map7d2	Arid5b	0.854838709677419	0.995967741935484	1	wtNA	NA	wt	Map7d2 Arid5b
Mapk10	Polb	0.935483870967742	0.715725806451613	2	wtNA	NA	NA	Mapk10 Polb
Mapk10	Sgms1	0.891129032258065	0.575940860215054	2	wtNA	NA	NA	Mapk10 Sgms1
Mgat5	Ldlrad4	0.991935483870968	0.530913978494624	2	NAhd	hd	hd	Mgat5 Ldlrad4
Mgat5	Ptpn4	0.979838709677419	0.625672043010753	2	NAhd	hd	NA	Mgat5 Ptpn4
Mpped2	Ncor1	0.883064516129032	0.966397849462366	7	wtNA	wt	wt	Mpped2 Ncor1
Mpped2	Nipbl	0.987903225806452	0.738575268817204	7	wtNA	wt	wt	Mpped2 Nipbl
Mpped2	Nrxn2	1	0.967741935483871	7	wtNA	wt	NA	Mpped2 Nrxn2
Mpped2	Pak3	0.887096774193548	1	7	wtNA	wt	NA	Mpped2 Pak3
Mpped2	Slc8a3	1	0.971774193548387	7	wtNA	wt	wt	Mpped2 Slc8a3
Mpped2	St3gal3	0.971774193548387	0.991935483870968	7	wtNA	wt	wt	Mpped2 St3gal3
Mpped2	Tmem108	0.995967741935484	0.971774193548387	7	wtNA	wt	wt	Mpped2 Tmem108
Nav3	Adgrl3	0.983870967741935	0.979166666666667	10	wthd	NA	NA	Nav3 Adgrl3
Nav3	Ctnnd2	0.951612903225806	0.983870967741935	10	wtNA	NA	wt	Nav3 Ctnnd2
Nav3	Frmd4a	0.967741935483871	0.539650537634409	10	wthd	NA	NA	Nav3 Frmd4a
Nav3	Gria2	0.987903225806452	0.975806451612903	10	wthd	NA	NA	Nav3 Gria2
Nav3	Grm5	0.951612903225806	0.983870967741935	10	wtNA	NA	NA	Nav3 Grm5
Nav3	Kat6b	1	0.957661290322581	10	wtNA	NA	NA	Nav3 Kat6b
Nav3	Kcnq1	0.951612903225806	0.965725806451613	10	wtNA	NA	NA	Nav3 Kcnq1
Nav3	Phf14	0.951612903225806	0.965725806451613	10	wtNA	NA	wt	Nav3 Phf14
Nav3	Rora	0.987903225806452	0.975134408602151	10	wtNA	NA	wt	Nav3 Rora
Nav3	Ttc19	0.935483870967742	0.969086021505376	10	wtNA	NA	NA	Nav3 Ttc19
Neat1	Spock1	1	0.975806451612903	1	NAhd	hd	hd	Neat1 Spock1
Nr3c2	Prpf4b	0.911290322580645	0.945564516129032	2	wtNA	wt	wt	Nr3c2 Prpf4b
Nr3c2	Ulk2	0.915322580645161	0.875	2	wtNA	wt	wt	Nr3c2 Ulk2
Nrg1	Slc4a10	0.891129032258065	0.596774193548387	1	NAhd	NA	NA	Nrg1 Slc4a10
Nrg3	Fgf14	0.987903225806452	0.541666666666667	1	wthd	NA	NA	Nrg3 Fgf14
Nrg3	Kcnip4	0.987903225806452	0.955645161290323	5	NAhd	NA	hd	Nrg3 Kcnip4
Nrg3	Nrg1	0.979838709677419	0.623655913978495	5	NAhd	NA	NA	Nrg3 Nrg1
Nrg3	Ppp2r5a	0.858870967741935	0.98991935483871	5	NAhd	NA	hd	Nrg3 Ppp2r5a
Nrg3	Slc4a10	0.94758064516129	0.639784946236559	5	NAhd	NA	NA	Nrg3 Slc4a10
Osbp2	Pkn2	0.963709677419355	0.948252688172043	2	NAhd	hd	hd	Osbp2 Pkn2
Osbp2	Zfp950	0.94758064516129	0.521505376344086	2	NAhd	hd	NA	Osbp2 Zfp950
Pacrg	Gm16168	1	0.973790322580645	1	NAhd	NA	NA	Pacrg Gm16168
Pak3	Lrch3	0.94758064516129	0.696908602150538	2	wtNA	NA	wt	Pak3 Lrch3
Pak3	Tmem108	0.895161290322581	0.649865591397849	2	wtNA	NA	wt	Pak3 Tmem108
Pbx1	Pde4d	0.919354838709677	0.775537634408602	1	wtNA	NA	NA	Pbx1 Pde4d
Pcdh10	Slc38a9	0.995967741935484	0.991935483870968	1	wtNA	wt	wt	Pcdh10 Slc38a9
Pcdh7	Cacna1c	0.935483870967742	0.685483870967742	7	wtNA	NA	NA	Pcdh7 Cacna1c
Pcdh7	Dip2c	0.862903225806452	0.948924731182796	7	wtNA	NA	wt	Pcdh7 Dip2c
Pcdh7	Fyn	0.94758064516129	0.692876344086022	7	wtNA	NA	NA	Pcdh7 Fyn
Pcdh7	Large	0.983870967741935	0.938172043010753	7	wtNA	NA	NA	Pcdh7 Large
Pcdh7	Prr5l	0.923387096774194	0.997983870967742	7	wtNA	NA	NA	Pcdh7 Prr5l
Pcdh7	Slc24a2	0.891129032258065	0.955645161290323	7	wtNA	NA	wt	Pcdh7 Slc24a2
Pcdh7	Tnik	0.995967741935484	0.935483870967742	7	wtNA	NA	NA	Pcdh7 Tnik
Pex5l	4930419G24Rik	1	0.987903225806452	4	wthd	NA	NA	Pex5l 4930419G24Rik
Pex5l	Eml1	0.959677419354839	0.870295698924731	4	wtNA	NA	wt	Pex5l Eml1
Pex5l	Gm37459	1	0.987903225806452	4	wthd	NA	NA	Pex5l Gm37459
Pex5l	Npas3	0.935483870967742	0.967741935483871	4	wtNA	NA	wt	Pex5l Npas3
PISD	Adam23	0.967741935483871	0.624327956989247	11	NAhd	hd	NA	PISD Adam23
PISD	Cdh11	0.911290322580645	0.548387096774194	11	NAhd	hd	NA	PISD Cdh11
PISD	Csmd1	1	0.973790322580645	11	NAhd	hd	NA	PISD Csmd1
PISD	Ddx5	0.895161290322581	0.981182795698925	11	NAhd	hd	NA	PISD Ddx5
PISD	Gramd1b	0.935483870967742	0.922715053763441	11	NAhd	hd	NA	PISD Gramd1b
PISD	Nrxn1	0.983870967741935	0.985887096774194	11	NAhd	hd	hd	PISD Nrxn1
PISD	Nrxn3	1	0.971774193548387	11	NAhd	hd	hd	PISD Nrxn3
PISD	Nsmce2	0.923387096774194	0.926747311827957	11	NAhd	hd	hd	PISD Nsmce2
PISD	Pbx1	1	0.953629032258065	11	NAhd	hd	NA	PISD Pbx1
PISD	Pde4d	0.866935483870968	0.923387096774194	11	NAhd	hd	NA	PISD Pde4d
PISD	Vwa8	1	0.963709677419355	11	NAhd	hd	NA	PISD Vwa8
Ppm1h	Arhgap26	0.92741935483871	0.793682795698925	4	wtNA	NA	NA	Ppm1h Arhgap26
Ppm1h	C130071C03Rik	0.991935483870968	0.791666666666667	4	wtNA	NA	NA	Ppm1h C130071C03Rik
Ppm1h	Herc1	0.983870967741935	0.985887096774194	4	wtNA	NA	wt	Ppm1h Herc1
Ppm1h	Ppm1l	0.94758064516129	0.831317204301075	1	NAhd	NA	hd	Ppm1h Ppm1l
Ppm1h	Prpf4b	0.879032258064516	0.991935483870968	4	wtNA	NA	wt	Ppm1h Prpf4b
Ppm1l	Lncpint	0.987903225806452	0.979166666666667	3	NAhd	hd	NA	Ppm1l Lncpint
Ppm1l	Nrxn2	0.979838709677419	0.975806451612903	3	NAhd	hd	NA	Ppm1l Nrxn2
Ppm1l	Tnik	0.951612903225806	0.733198924731183	3	NAhd	hd	NA	Ppm1l Tnik
Ppp1cc	RP24-263G24.2	0.975806451612903	0.612903225806452	1	wtNA	wt	wt	Ppp1cc RP24-263G24.2
Ppp2r5e	Esyt2	0.92741935483871	0.596102150537635	1	NAhd	hd	hd	Ppp2r5e Esyt2
Prkce	Anapc5	0.891129032258065	0.89247311827957	24	wtNA	NA	wt	Prkce Anapc5
Prkce	Btaf1	0.923387096774194	0.781586021505376	24	wtNA	NA	wt	Prkce Btaf1
Prkce	Camk2d	0.883064516129032	0.518145161290323	24	wtNA	NA	wt	Prkce Camk2d
Prkce	Cdc37l1	0.899193548387097	0.866263440860215	24	wtNA	NA	wt	Prkce Cdc37l1
Prkce	Ctdspl	0.94758064516129	0.8125	24	wtNA	NA	wt	Prkce Ctdspl
Prkce	Cux2	0.919354838709677	0.942204301075269	24	wtNA	NA	wt	Prkce Cux2
Prkce	Ddx5	0.911290322580645	0.95497311827957	24	wtNA	NA	NA	Prkce Ddx5
Prkce	Gm20754	0.983870967741935	0.838037634408602	24	wtNA	NA	wt	Prkce Gm20754
Prkce	Gria4	0.939516129032258	0.772177419354839	24	wtNA	NA	wt	Prkce Gria4
Prkce	Grid2	0.94758064516129	0.783602150537634	24	wtNA	NA	wt	Prkce Grid2
Prkce	Grm7	1	0.695564516129032	24	wthd	NA	NA	Prkce Grm7
Prkce	Kdm3b	0.963709677419355	0.913978494623656	24	wtNA	NA	wt	Prkce Kdm3b
Prkce	Map2	0.995967741935484	0.731854838709677	24	wthd	NA	NA	Prkce Map2
Prkce	Mapk10	1	0.530241935483871	24	wthd	NA	NA	Prkce Mapk10
Prkce	Mgat5	0.983870967741935	0.534274193548387	9	NAhd	NA	hd	Prkce Mgat5
Prkce	Polb	1	0.729838709677419	24	wthd	NA	NA	Prkce Polb
Prkce	Ppm1h	0.903225806451613	0.951612903225806	24	wtNA	NA	NA	Prkce Ppm1h
Prkce	Ptpn4	1	0.790322580645161	24	wtNA	NA	NA	Prkce Ptpn4
Prkce	Rbm5	0.995967741935484	0.845430107526882	24	wtNA	NA	wt	Prkce Rbm5
Prkce	Rcan2	0.959677419354839	0.875	9	NAhd	NA	NA	Prkce Rcan2
Prkce	Rnf121	1	0.969758064516129	24	wthd	NA	NA	Prkce Rnf121
Prkce	Sgip1	0.991935483870968	0.920698924731183	24	wthd	NA	NA	Prkce Sgip1
Prkce	Sgms1	1	0.588709677419355	24	wthd	NA	NA	Prkce Sgms1
Prkce	Smarca2	0.991935483870968	0.957661290322581	24	wtNA	NA	NA	Prkce Smarca2
Prkce	Sos2	0.959677419354839	0.971102150537634	24	wtNA	NA	wt	Prkce Sos2
Prkce	Ube2e2	0.943548387096774	0.733198924731183	24	wtNA	NA	wt	Prkce Ube2e2
Ptgds	Apoe	0.975806451612903	0.983870967741935	2	wtNA	wt	wt	Ptgds Apoe
Ptgds	Fam13c	0.891129032258065	0.985215053763441	2	wtNA	wt	NA	Ptgds Fam13c
Ptpn4	Cacnb4	0.875	0.901209677419355	2	wthd	NA	NA	Ptpn4 Cacnb4
Ptpn4	Kif1a	0.850806451612903	0.84744623655914	2	wtNA	NA	wt	Ptpn4 Kif1a
Qk	Sept7	0.967741935483871	0.959677419354839	3	NAhd	hd	hd	Qk Sept7
Qk	St6galnac3	0.895161290322581	0.987231182795699	3	NAhd	hd	hd	Qk St6galnac3
Qk	Tmeff2	0.879032258064516	0.977150537634409	3	NAhd	hd	hd	Qk Tmeff2
Rab30	Lrrc4	1	0.967741935483871	3	wtNA	NA	wt	Rab30 Lrrc4
Rab30	Pclo	1	0.997983870967742	3	wtNA	NA	wt	Rab30 Pclo
Rab30	Sdccag8	0.955645161290323	0.981182795698925	3	wtNA	NA	wt	Rab30 Sdccag8
Ranbp17	Arsb	1	0.733870967741935	1	wtNA	wt	wt	Ranbp17 Arsb
Rnf121	9330159F19Rik	1	0.899193548387097	5	NAhd	NA	hd	Rnf121 9330159F19Rik
Rnf121	Cadm1	1	0.987903225806452	3	wtNA	NA	wt	Rnf121 Cadm1
Rnf121	Dennd1a	0.991935483870968	0.983870967741935	3	wthd	NA	NA	Rnf121 Dennd1a
Rnf121	Meg3	0.854838709677419	0.959005376344086	5	NAhd	NA	hd	Rnf121 Meg3
Rnf121	Ppp2r5e	0.915322580645161	0.891801075268817	5	NAhd	NA	hd	Rnf121 Ppp2r5e
Rnf121	Smarca2	0.987903225806452	0.842741935483871	3	wthd	NA	NA	Rnf121 Smarca2
Sdccag8	Pclo	0.919354838709677	0.938844086021505	1	wtNA	wt	wt	Sdccag8 Pclo
Sec61a2	1700111E14Rik	0.995967741935484	0.915322580645161	2	wtNA	wt	wt	Sec61a2 1700111E14Rik
Sec61a2	Son	0.862903225806452	1	2	wtNA	wt	wt	Sec61a2 Son
Sema6d	Alk	0.959677419354839	0.959677419354839	1	NAhd	NA	hd	Sema6d Alk
Sgk1	Add1	1	1	8	NAhd	NA	hd	Sgk1 Add1
Sgk1	Aplp2	0.983870967741935	0.993951612903226	9	wtNA	NA	wt	Sgk1 Aplp2
Sgk1	Arhgap26	0.987903225806452	1	8	NAhd	NA	NA	Sgk1 Arhgap26
Sgk1	Coro1c	1	1	9	wtNA	NA	wt	Sgk1 Coro1c
Sgk1	Dock4	0.979838709677419	1	8	NAhd	NA	hd	Sgk1 Dock4
Sgk1	Galnt13	0.975806451612903	0.854166666666667	8	NAhd	NA	NA	Sgk1 Galnt13
Sgk1	Gm42418	0.907258064516129	1	9	wtNA	NA	wt	Sgk1 Gm42418
Sgk1	Klf13	0.971774193548387	1	8	NAhd	NA	hd	Sgk1 Klf13
Sgk1	Map7d2	0.983870967741935	1	8	NAhd	NA	NA	Sgk1 Map7d2
Sgk1	Otud7a	0.858870967741935	1	9	wtNA	NA	wt	Sgk1 Otud7a
Sgk1	Pcdh17	1	1	9	wtNA	NA	wt	Sgk1 Pcdh17
Sgk1	Rnf220	0.887096774193548	1	9	wtNA	NA	wt	Sgk1 Rnf220
Sgk1	Setbp1	0.879032258064516	1	9	wthd	NA	NA	Sgk1 Setbp1
Sgk1	Sytl2	0.883064516129032	1	9	wtNA	NA	wt	Sgk1 Sytl2
Sgk1	Tnr	1	0.983870967741935	9	wthd	NA	NA	Sgk1 Tnr
Slc4a10	Adam23	1	0.883064516129032	7	wtNA	NA	NA	Slc4a10 Adam23
Slc4a10	Adgrb3	0.903225806451613	0.995967741935484	7	wtNA	NA	wt	Slc4a10 Adgrb3
Slc4a10	Csmd1	0.94758064516129	0.997983870967742	7	wtNA	NA	NA	Slc4a10 Csmd1
Slc4a10	Galnt13	0.967741935483871	0.98991935483871	7	wtNA	NA	NA	Slc4a10 Galnt13
Slc4a10	Nrg1	0.991935483870968	0.639112903225807	7	wtNA	NA	NA	Slc4a10 Nrg1
Slc4a10	Syt1	1	0.995967741935484	7	wtNA	NA	NA	Slc4a10 Syt1
Slc4a10	Ttc19	0.963709677419355	0.668010752688172	7	wtNA	NA	NA	Slc4a10 Ttc19
Sobp	Ddx17	0.955645161290323	0.977150537634409	2	wtNA	wt	wt	Sobp Ddx17
Sobp	Pcdh17	0.883064516129032	1	2	wtNA	wt	wt	Sobp Pcdh17
Sybu	Hivep3	0.858870967741935	0.981182795698925	1	wtNA	wt	wt	Sybu Hivep3
Syn3	2410089E03Rik	0.899193548387097	0.979166666666667	5	wtNA	NA	wt	Syn3 2410089E03Rik
Syn3	Ccnl2	1	0.923387096774194	5	wtNA	NA	wt	Syn3 Ccnl2
Syn3	Gm16599	1	0.622983870967742	1	NAhd	NA	NA	Syn3 Gm16599
Syn3	Gramd1b	1	0.713709677419355	5	wtNA	NA	NA	Syn3 Gramd1b
Syn3	Pbx1	1	0.993951612903226	5	wtNA	NA	NA	Syn3 Pbx1
Syn3	Tanc2	1	0.967741935483871	5	wtNA	NA	wt	Syn3 Tanc2
Synpr	Dgki	0.899193548387097	0.526881720430108	1	wtNA	NA	NA	Synpr Dgki
Syt1	Kcnip4	0.959677419354839	0.977150537634409	4	NAhd	NA	hd	Syt1 Kcnip4
Syt1	Nrg1	0.899193548387097	0.635752688172043	4	NAhd	NA	NA	Syt1 Nrg1
Syt1	Nrg3	1	0.913306451612903	4	NAhd	NA	NA	Syt1 Nrg3
Syt1	Slc4a10	0.899193548387097	0.638440860215054	4	NAhd	NA	NA	Syt1 Slc4a10
Tln2	Pde4b	0.870967741935484	1	1	wtNA	wt	wt	Tln2 Pde4b
Tnr	1700111E14Rik	0.971774193548387	1	19	wtNA	NA	wt	Tnr 1700111E14Rik
Tnr	Akt3	0.975806451612903	0.935483870967742	19	wtNA	NA	wt	Tnr Akt3
Tnr	Arl15	1	0.995967741935484	19	wtNA	NA	wt	Tnr Arl15
Tnr	Cdc42bpa	0.858870967741935	1	19	wtNA	NA	wt	Tnr Cdc42bpa
Tnr	Cdc42se2	1	0.862903225806452	19	wtNA	NA	wt	Tnr Cdc42se2
Tnr	Flnb	0.971774193548387	1	19	wtNA	NA	wt	Tnr Flnb
Tnr	Gpm6b	0.92741935483871	1	19	wtNA	NA	wt	Tnr Gpm6b
Tnr	Kcnq1ot1	0.995967741935484	1	19	wtNA	NA	NA	Tnr Kcnq1ot1
Tnr	Map1b	0.991935483870968	0.995967741935484	19	wtNA	NA	wt	Tnr Map1b
Tnr	Mllt10	0.862903225806452	1	19	wtNA	NA	wt	Tnr Mllt10
Tnr	Pcdh10	1	0.943548387096774	19	wtNA	NA	wt	Tnr Pcdh10
Tnr	Ralgapa1	0.850806451612903	1	19	wtNA	NA	wt	Tnr Ralgapa1
Tnr	Sema6d	0.923387096774194	1	19	wtNA	NA	NA	Tnr Sema6d
Tnr	Setbp1	1	1	19	wtNA	NA	NA	Tnr Setbp1
Tnr	Slc38a9	1	0.991935483870968	19	wtNA	NA	wt	Tnr Slc38a9
Tnr	Sptbn1	1	0.991935483870968	19	wtNA	NA	wt	Tnr Sptbn1
Tnr	Tfdp2	0.995967741935484	1	19	wtNA	NA	wt	Tnr Tfdp2
Tnr	Tmbim1	0.858870967741935	1	19	wtNA	NA	wt	Tnr Tmbim1
Tnr	Tox	0.887096774193548	1	19	wtNA	NA	wt	Tnr Tox
Tox	Btbd9	0.850806451612903	0.989247311827957	4	wtNA	wt	wt	Tox Btbd9
Tox	Glrb	0.975806451612903	0.997311827956989	4	wtNA	wt	wt	Tox Glrb
Tox	Nedd4l	0.979838709677419	0.649865591397849	4	wtNA	wt	wt	Tox Nedd4l
Tox	Smurf2	0.975806451612903	1	4	wtNA	wt	wt	Tox Smurf2
Zbtb16	Bcl2l1	0.951612903225806	0.986559139784946	15	wtNA	wt	wt	Zbtb16 Bcl2l1
Zbtb16	Cdc42bpa	0.971774193548387	0.995967741935484	15	wtNA	wt	wt	Zbtb16 Cdc42bpa
Zbtb16	Daam2	1	0.94758064516129	15	wtNA	wt	wt	Zbtb16 Daam2
Zbtb16	Fkbp5	1	0.959677419354839	15	wtNA	wt	wt	Zbtb16 Fkbp5
Zbtb16	Hecw2	0.971774193548387	0.990591397849462	15	wtNA	wt	wt	Zbtb16 Hecw2
Zbtb16	Htra1	0.995967741935484	0.910618279569892	15	wtNA	wt	wt	Zbtb16 Htra1
Zbtb16	Itpk1	1	0.945564516129032	15	wtNA	wt	wt	Zbtb16 Itpk1
Zbtb16	Mast4	0.919354838709677	0.96505376344086	15	wtNA	wt	wt	Zbtb16 Mast4
Zbtb16	Oxr1	0.943548387096774	0.987903225806452	15	wtNA	wt	wt	Zbtb16 Oxr1
Zbtb16	Palm2	0.955645161290323	0.941532258064516	15	wtNA	wt	wt	Zbtb16 Palm2
Zbtb16	Rcan2	1	0.92741935483871	15	wtNA	wt	NA	Zbtb16 Rcan2
Zbtb16	Sgk1	1	0.903225806451613	15	wtNA	wt	NA	Zbtb16 Sgk1
Zbtb16	Slc6a1	0.991935483870968	0.916666666666667	15	wtNA	wt	wt	Zbtb16 Slc6a1
Zbtb16	Sulf2	0.955645161290323	0.932795698924731	15	wtNA	wt	wt	Zbtb16 Sulf2
Zbtb16	Tmod2	1	0.973790322580645	15	wtNA	wt	wt	Zbtb16 Tmod2
Zfp462	Dgki	0.858870967741935	1	1	wtNA	wt	NA	Zfp462 Dgki
Zfp950	Apc	0.943548387096774	0.997311827956989	1	NAhd	NA	hd	Zfp950 Apc
Zfp950	Gm16599	1	0.957661290322581	1	wtNA	NA	NA	Zfp950 Gm16599

## Sheet: Blue_OL bnet IRIS3
from.x	to.x	strength.x	direction.x	degree.out	condcat	uninode	uninode_1	edgename	Up.Down	Up.Down_2	cell.type.x	cell.type.y	Region.from	Region.to
Qk	Sept7	0.967742	0.959677	3	NAhd	hd	hd	Qk Sept7	Down	Down	Oligo	Oligo	12str	12str
Sec61a2	1700111E14Rik	0.995968	0.915323	2	wtNA	wt	wt	Sec61a2 1700111E14Rik	Up	Up	Oligo	Oligo	8ctx	8str
Tnr	1700111E14Rik	0.971774	1	19	wtNA	NA	wt	Tnr 1700111E14Rik	Up	Up	Oligo	Oligo	12str	8str
Syn3	2410089E03Rik	0.899194	0.979167	5	wtNA	NA	wt	Syn3 2410089E03Rik	Up	Up	Oligo	Oligo	12str	12str
Pex5l	4930419G24Rik	1	0.987903	4	wthd	NA	NA	Pex5l 4930419G24Rik	Down	Down	Oligo	Oligo	12ctx	12str
Rnf121	9330159F19Rik	1	0.899194	5	NAhd	NA	hd	Rnf121 9330159F19Rik	Up	UpDown	Oligo	Oligo	8str	8str
Kcnab1	A330015K06Rik	1	0.897177	1	wthd	NA	NA	Kcnab1 A330015K06Rik	Down	Down	Oligo	Oligo	8ctx	12str
Arsb	A930015D03Rik	0.927419	1	3	wtNA	wt	wt	Arsb A930015D03Rik	Up	Up	Oligo	Oligo	8str	8str
PISD	Adam23	0.967742	0.624328	11	NAhd	hd	NA	PISD Adam23	Up	Up	Oligo	Oligo	12str	12str
Slc4a10	Adam23	1	0.883065	7	wtNA	NA	NA	Slc4a10 Adam23	Up	Up	Oligo	Oligo	12str	12str
Sgk1	Add1	1	1	8	NAhd	NA	hd	Sgk1 Add1	Down	Down	Oligo	Oligo	12str	8str
Slc4a10	Adgrb3	0.903226	0.995968	7	wtNA	NA	wt	Slc4a10 Adgrb3	Up	Up	Oligo	Oligo	12str	12str
Nav3	Adgrl3	0.983871	0.979167	10	wthd	NA	NA	Nav3 Adgrl3	Up	Up	Oligo	Oligo	12ctx	8ctx
Kirrel3	Agmo	0.919355	1	7	wtNA	NA	wt	Kirrel3 Agmo	UpDown	Up	Oligo	Oligo	12str	12str
Tnr	Akt3	0.975806	0.935484	19	wtNA	NA	wt	Tnr Akt3	Up	Up	Oligo	Oligo	12str	12str
Sema6d	Alk	0.959677	0.959677	1	NAhd	NA	hd	Sema6d Alk	Up	Up	Oligo	Oligo	8ctx	12ctx
Prkce	Anapc5	0.891129	0.892473	24	wtNA	NA	wt	Prkce Anapc5	Up	Up	Oligo	Oligo	12str	8str
Kirrel3	Anln	1	0.735887	7	wthd	NA	NA	Kirrel3 Anln	UpDown	Up	Oligo	Oligo	12str	12str
Zfp950	Apc	0.943548	0.997312	1	NAhd	NA	hd	Zfp950 Apc	Up	Up	Oligo	Oligo	8str	12str
Sgk1	Aplp2	0.983871	0.993952	9	wtNA	NA	wt	Sgk1 Aplp2	Down	Up	Oligo	Oligo	12str	12str
Ptgds	Apoe	0.975806	0.983871	2	wtNA	wt	wt	Ptgds Apoe	Down	UpDown	Oligo	Oligo	12ctx	12str
Ppm1h	Arhgap26	0.927419	0.793683	4	wtNA	NA	NA	Ppm1h Arhgap26	Up	Up	Oligo	Oligo	12str	12str
Sgk1	Arhgap26	0.987903	1	8	NAhd	NA	NA	Sgk1 Arhgap26	Down	Up	Oligo	Oligo	12str	12str
Cacna1c	Arhgap39	0.995968	0.913306	9	NAhd	NA	hd	Cacna1c Arhgap39	Down	Down	Oligo	Oligo	8str	12str
Jakmip2	Arhgef12	0.862903	0.932124	7	NAhd	hd	hd	Jakmip2 Arhgef12	Up	Down	Oligo	Oligo	12ctx	12str
Kat6b	Arhgef12	1	0.872984	4	NAhd	NA	hd	Kat6b Arhgef12	Up	Down	Oligo	Oligo	12str	12str
Fchsd2	Arid4b	0.943548	0.925403	12	wtNA	wt	wt	Fchsd2 Arid4b	Up	Up	Oligo	Oligo	12str	12str
Map7d2	Arid5b	0.854839	0.995968	1	wtNA	NA	wt	Map7d2 Arid5b	UpDown	UpDown	Oligo	Oligo	12str	12str
Tnr	Arl15	1	0.995968	19	wtNA	NA	wt	Tnr Arl15	Up	Up	Oligo	Oligo	12str	12str
Ranbp17	Arsb	1	0.733871	1	wtNA	wt	wt	Ranbp17 Arsb	Up	Up	Oligo	Oligo	12str	8str
Gls	Asap1	0.991935	0.695565	1	wtNA	NA	wt	Gls Asap1	Up	Up	Oligo	Oligo	8ctx	12str
Fnbp1	Aspa	0.971774	0.953629	5	NAhd	hd	hd	Fnbp1 Aspa	Down	Down	Oligo	Oligo	12ctx	12str
Kat6b	Atp2c1	0.927419	0.982527	4	NAhd	NA	hd	Kat6b Atp2c1	Up	Up	Oligo	Oligo	12str	12str
Fchsd2	Atp6v0a1	0.959677	0.983871	12	wtNA	wt	wt	Fchsd2 Atp6v0a1	Up	Up	Oligo	Oligo	12str	12str
Camk2d	Atp9a	0.995968	0.961694	6	wtNA	wt	wt	Camk2d Atp9a	Up	Up	Oligo	Oligo	12str	12str
Cacna1c	Atxn7l1	0.995968	0.785618	9	NAhd	NA	NA	Cacna1c Atxn7l1	Down	Up	Oligo	Oligo	8str	12str
Camk2d	Atxn7l1	0.875	0.637769	6	wtNA	wt	NA	Camk2d Atxn7l1	Up	Up	Oligo	Oligo	12str	12str
Gm20754	Auts2	0.983871	0.981183	6	wtNA	wt	wt	Gm20754 Auts2	Up	Down	Oligo	Oligo	12str	8str
Zbtb16	Bcl2l1	0.951613	0.986559	15	wtNA	wt	wt	Zbtb16 Bcl2l1	UpDown	UpDown	Oligo	Oligo	8ctx	12ctx
Prkce	Btaf1	0.923387	0.781586	24	wtNA	NA	wt	Prkce Btaf1	Up	Up	Oligo	Oligo	12str	12ctx
Tox	Btbd9	0.850806	0.989247	4	wtNA	wt	wt	Tox Btbd9	Up	Up	Oligo	Oligo	12str	12str
Arhgap26	C130071C03Rik	0.971774	0.797715	3	wtNA	NA	NA	Arhgap26 C130071C03Rik	Up	Up	Oligo	Oligo	12str	12ctx
Ppm1h	C130071C03Rik	0.991935	0.791667	4	wtNA	NA	NA	Ppm1h C130071C03Rik	Up	Up	Oligo	Oligo	12str	12ctx
Ldlrad4	Cacna1c	0.959677	0.600134	1	NAhd	hd	NA	Ldlrad4 Cacna1c	Down	Down	Oligo	Oligo	12str	8str
Pcdh7	Cacna1c	0.935484	0.685484	7	wtNA	NA	NA	Pcdh7 Cacna1c	Up	Down	Oligo	Oligo	12str	8str
Ddhd2	Cacna2d1	0.955645	0.663978	3	wthd	NA	NA	Ddhd2 Cacna2d1	Up	Up	Oligo	Oligo	12str	12str
Ptpn4	Cacnb4	0.875	0.90121	2	wthd	NA	NA	Ptpn4 Cacnb4	Up	Up	Oligo	Oligo	12str	12str
Rnf121	Cadm1	1	0.987903	3	wtNA	NA	wt	Rnf121 Cadm1	Up	Up	Oligo	Oligo	8str	12str
Cdh11	Cadps	1	0.875	4	wtNA	NA	wt	Cdh11 Cadps	Up	Up	Oligo	Oligo	12str	12ctx
Prkce	Camk2d	0.883065	0.518145	24	wtNA	NA	wt	Prkce Camk2d	Up	Up	Oligo	Oligo	12str	12str
Fchsd2	Ccnl2	0.883065	0.915323	12	wtNA	wt	wt	Fchsd2 Ccnl2	Up	Up	Oligo	Oligo	12str	12str
Syn3	Ccnl2	1	0.923387	5	wtNA	NA	wt	Syn3 Ccnl2	Up	Up	Oligo	Oligo	12str	12str
Jakmip2	Ccser1	0.975806	0.968414	7	NAhd	hd	NA	Jakmip2 Ccser1	Up	Up	Oligo	Oligo	12ctx	8str
Prkce	Cdc37l1	0.899194	0.866263	24	wtNA	NA	wt	Prkce Cdc37l1	Up	Down	Oligo	Oligo	12str	12str
Tnr	Cdc42bpa	0.858871	1	19	wtNA	NA	wt	Tnr Cdc42bpa	Up	Down	Oligo	Oligo	12str	12ctx
Zbtb16	Cdc42bpa	0.971774	0.995968	15	wtNA	wt	wt	Zbtb16 Cdc42bpa	UpDown	Down	Oligo	Oligo	8ctx	12ctx
Tnr	Cdc42se2	1	0.862903	19	wtNA	NA	wt	Tnr Cdc42se2	Up	Up	Oligo	Oligo	12str	12str
Atxn7l1	Cdh11	1	0.883065	5	wthd	NA	NA	Atxn7l1 Cdh11	Up	Up	Oligo	Oligo	12str	12str
PISD	Cdh11	0.91129	0.548387	11	NAhd	hd	NA	PISD Cdh11	Up	Up	Oligo	Oligo	12str	12str
C130071C03Rik	Cdh2	0.850806	0.987231	1	wtNA	NA	wt	C130071C03Rik Cdh2	Up	Up	Oligo	Oligo	12ctx	8str
Kirrel3	Cntn3	0.895161	0.754704	11	NAhd	NA	hd	Kirrel3 Cntn3	UpDown	Up	Oligo	Oligo	12str	8str
Sgk1	Coro1c	1	1	9	wtNA	NA	wt	Sgk1 Coro1c	Down	Down	Oligo	Oligo	12str	8str
PISD	Csmd1	1	0.97379	11	NAhd	hd	NA	PISD Csmd1	Up	Down	Oligo	Oligo	12str	12ctx
Slc4a10	Csmd1	0.947581	0.997984	7	wtNA	NA	NA	Slc4a10 Csmd1	Up	Down	Oligo	Oligo	12str	12ctx
Prkce	Ctdspl	0.947581	0.8125	24	wtNA	NA	wt	Prkce Ctdspl	Up	Up	Oligo	Oligo	12str	8ctx
Kirrel3	Ctnna2	0.991935	0.807796	11	NAhd	NA	hd	Kirrel3 Ctnna2	UpDown	Up	Oligo	Oligo	12str	12str
Kirrel3	Ctnna3	0.951613	1	7	wtNA	NA	wt	Kirrel3 Ctnna3	UpDown	Down	Oligo	Oligo	12str	8ctx
Nav3	Ctnnd2	0.951613	0.983871	10	wtNA	NA	wt	Nav3 Ctnnd2	Up	Up	Oligo	Oligo	12ctx	8ctx
Prkce	Cux2	0.919355	0.942204	24	wtNA	NA	wt	Prkce Cux2	Up	Up	Oligo	Oligo	12str	12str
Zbtb16	Daam2	1	0.947581	15	wtNA	wt	wt	Zbtb16 Daam2	UpDown	UpDown	Oligo	Oligo	8ctx	12str
Sobp	Ddx17	0.955645	0.977151	2	wtNA	wt	wt	Sobp Ddx17	Up	Up	Oligo	Oligo	8str	8ctx
PISD	Ddx5	0.895161	0.981183	11	NAhd	hd	NA	PISD Ddx5	Up	Up	Oligo	Oligo	12str	12ctx
Prkce	Ddx5	0.91129	0.954973	24	wtNA	NA	NA	Prkce Ddx5	Up	Up	Oligo	Oligo	12str	12ctx
Rnf121	Dennd1a	0.991935	0.983871	3	wthd	NA	NA	Rnf121 Dennd1a	Up	Up	Oligo	Oligo	8str	12str
Fchsd2	Dennd4a	0.991935	0.81922	12	wtNA	wt	wt	Fchsd2 Dennd4a	Up	Up	Oligo	Oligo	12str	12str
Kirrel3	Dgki	0.895161	0.995968	11	NAhd	NA	NA	Kirrel3 Dgki	UpDown	Up	Oligo	Oligo	12str	8str
Synpr	Dgki	0.899194	0.526882	1	wtNA	NA	NA	Synpr Dgki	UpDown	Up	Oligo	Oligo	12ctx	8str
Zfp462	Dgki	0.858871	1	1	wtNA	wt	NA	Zfp462 Dgki	Up	Up	Oligo	Oligo	12str	8str
Pcdh7	Dip2c	0.862903	0.948925	7	wtNA	NA	wt	Pcdh7 Dip2c	Up	Up	Oligo	Oligo	12str	12str
Fchsd2	Dmd	1	0.917339	12	wtNA	wt	NA	Fchsd2 Dmd	Up	Up	Oligo	Oligo	12str	12str
Jakmip2	Dmd	0.955645	0.97043	7	NAhd	hd	NA	Jakmip2 Dmd	Up	Up	Oligo	Oligo	12ctx	12str
Galnt13	Dnm2	0.987903	0.995968	3	NAhd	NA	hd	Galnt13 Dnm2	Up	Down	Oligo	Oligo	12str	12str
Sgk1	Dock4	0.979839	1	8	NAhd	NA	hd	Sgk1 Dock4	Down	Up	Oligo	Oligo	12str	8str
Adam23	Dync1i1	0.915323	0.854839	1	wtNA	NA	wt	Adam23 Dync1i1	Up	Up	Oligo	Oligo	12str	12str
Kat6b	Elmod2	0.935484	0.984543	4	NAhd	NA	hd	Kat6b Elmod2	Up	Down	Oligo	Oligo	12str	12str
Pex5l	Eml1	0.959677	0.870296	4	wtNA	NA	wt	Pex5l Eml1	Down	Up	Oligo	Oligo	12ctx	12str
Kirrel3	Enpp6	1	0.774194	11	NAhd	NA	NA	Kirrel3 Enpp6	UpDown	Up	Oligo	Oligo	12str	12str
Ppp2r5e	Esyt2	0.927419	0.596102	1	NAhd	hd	hd	Ppp2r5e Esyt2	Up	Up	Oligo	Oligo	12ctx	12str
Arsb	Fam120c	0.854839	0.94086	3	wtNA	wt	wt	Arsb Fam120c	Up	Up	Oligo	Oligo	8str	12str
Kirrel3	Fam13c	0.967742	0.9375	11	NAhd	NA	NA	Kirrel3 Fam13c	UpDown	UpDown	Oligo	Oligo	12str	12ctx
Ptgds	Fam13c	0.891129	0.985215	2	wtNA	wt	NA	Ptgds Fam13c	Down	UpDown	Oligo	Oligo	12ctx	12ctx
Ccser1	Fchsd2	1	0.677419	1	wtNA	NA	wt	Ccser1 Fchsd2	Up	Up	Oligo	Oligo	8str	12str
Arhgap26	Fgf1	0.907258	0.895161	1	NAhd	NA	hd	Arhgap26 Fgf1	Up	Up	Oligo	Oligo	12str	8str
Kcnip4	Fgf14	0.899194	0.615591	1	NAhd	hd	NA	Kcnip4 Fgf14	Down	Down	Oligo	Oligo	8ctx	12str
Nrg3	Fgf14	0.987903	0.541667	1	wthd	NA	NA	Nrg3 Fgf14	Down	Down	Oligo	Oligo	12ctx	12str
Gm20754	Fhit	1	0.891129	6	wtNA	wt	wt	Gm20754 Fhit	Up	Up	Oligo	Oligo	12str	12str
Zbtb16	Fkbp5	1	0.959677	15	wtNA	wt	wt	Zbtb16 Fkbp5	UpDown	Down	Oligo	Oligo	8ctx	12str
Tnr	Flnb	0.971774	1	19	wtNA	NA	wt	Tnr Flnb	Up	Up	Oligo	Oligo	12str	12str
Fchsd2	Frmd4a	0.939516	0.923387	12	wtNA	wt	NA	Fchsd2 Frmd4a	Up	Up	Oligo	Oligo	12str	12str
Nav3	Frmd4a	0.967742	0.539651	10	wthd	NA	NA	Nav3 Frmd4a	Up	Up	Oligo	Oligo	12ctx	12str
Atxn7l1	Fyn	0.971774	0.874328	5	wtNA	NA	NA	Atxn7l1 Fyn	Up	Up	Oligo	Oligo	12str	12str
Cacna1c	Fyn	0.979839	0.941532	9	NAhd	NA	NA	Cacna1c Fyn	Down	Up	Oligo	Oligo	8str	12str
Pcdh7	Fyn	0.947581	0.692876	7	wtNA	NA	NA	Pcdh7 Fyn	Up	Up	Oligo	Oligo	12str	12str
Adcy5	Galnt13	0.931452	0.932796	2	NAhd	NA	NA	Adcy5 Galnt13	Down	Up	Oligo	Oligo	12str	12str
Sgk1	Galnt13	0.975806	0.854167	8	NAhd	NA	NA	Sgk1 Galnt13	Down	Up	Oligo	Oligo	12str	12str
Slc4a10	Galnt13	0.967742	0.989919	7	wtNA	NA	NA	Slc4a10 Galnt13	Up	Up	Oligo	Oligo	12str	12str
Tox	Glrb	0.975806	0.997312	4	wtNA	wt	wt	Tox Glrb	Up	Up	Oligo	Oligo	12str	8str
Adam23	Gls	1	0.929435	2	NAhd	NA	NA	Adam23 Gls	Up	Up	Oligo	Oligo	12str	8ctx
Chd9	Gls	0.96371	0.600806	1	wtNA	wt	NA	Chd9 Gls	Up	Up	Oligo	Oligo	8ctx	8ctx
Acaca	Gm11437	1	0.967742	1	wthd	NA	NA	Acaca Gm11437	Up	Up	Oligo	Oligo	8str	8str
Pacrg	Gm16168	1	0.97379	1	NAhd	NA	NA	Pacrg Gm16168	Down	Down	Oligo	Oligo	12ctx	12ctx
Syn3	Gm16599	1	0.622984	1	NAhd	NA	NA	Syn3 Gm16599	Up	Up	Oligo	Oligo	12str	12ctx
Zfp950	Gm16599	1	0.957661	1	wtNA	NA	NA	Zfp950 Gm16599	Up	Up	Oligo	Oligo	8str	12ctx
Prkce	Gm20754	0.983871	0.838038	24	wtNA	NA	wt	Prkce Gm20754	Up	Up	Oligo	Oligo	12str	12str
Pex5l	Gm37459	1	0.987903	4	wthd	NA	NA	Pex5l Gm37459	Down	UpDown	Oligo	Oligo	12ctx	12ctx
Sgk1	Gm42418	0.907258	1	9	wtNA	NA	wt	Sgk1 Gm42418	Down	Down	Oligo	Oligo	12str	12str
Tnr	Gpm6b	0.927419	1	19	wtNA	NA	wt	Tnr Gpm6b	Up	Down	Oligo	Oligo	12str	12str
Fchsd2	Gramd1b	1	0.91129	12	wtNA	wt	NA	Fchsd2 Gramd1b	Up	Up	Oligo	Oligo	12str	12str
PISD	Gramd1b	0.935484	0.922715	11	NAhd	hd	NA	PISD Gramd1b	Up	Up	Oligo	Oligo	12str	12str
Syn3	Gramd1b	1	0.71371	5	wtNA	NA	NA	Syn3 Gramd1b	Up	Up	Oligo	Oligo	12str	12str
Nav3	Gria2	0.987903	0.975806	10	wthd	NA	NA	Nav3 Gria2	Up	Up	Oligo	Oligo	12ctx	12ctx
Prkce	Gria4	0.939516	0.772177	24	wtNA	NA	wt	Prkce Gria4	Up	Up	Oligo	Oligo	12str	8str
Prkce	Grid2	0.947581	0.783602	24	wtNA	NA	wt	Prkce Grid2	Up	Up	Oligo	Oligo	12str	8ctx
Arsb	Grik4	0.979839	0.983871	3	wtNA	wt	wt	Arsb Grik4	Up	Down	Oligo	Oligo	8str	12str
Nav3	Grm5	0.951613	0.983871	10	wtNA	NA	NA	Nav3 Grm5	Up	Down	Oligo	Oligo	12ctx	12str
Prkce	Grm7	1	0.695565	24	wthd	NA	NA	Prkce Grm7	Up	Down	Oligo	Oligo	12str	8ctx
Frmd4a	Gsk3b	0.995968	0.790323	1	wtNA	NA	NA	Frmd4a Gsk3b	Up	Up	Oligo	Oligo	12str	12str
Jakmip2	Gsk3b	0.870968	0.977823	7	NAhd	hd	NA	Jakmip2 Gsk3b	Up	Up	Oligo	Oligo	12ctx	12str
Kat6b	Gsk3b	1	0.977823	4	NAhd	NA	NA	Kat6b Gsk3b	Up	Up	Oligo	Oligo	12str	12str
Zbtb16	Hecw2	0.971774	0.990591	15	wtNA	wt	wt	Zbtb16 Hecw2	UpDown	Down	Oligo	Oligo	8ctx	12ctx
Ppm1h	Herc1	0.983871	0.985887	4	wtNA	NA	wt	Ppm1h Herc1	Up	Up	Oligo	Oligo	12str	12str
Sybu	Hivep3	0.858871	0.981183	1	wtNA	wt	wt	Sybu Hivep3	Up	Up	Oligo	Oligo	8ctx	12str
Zbtb16	Htra1	0.995968	0.910618	15	wtNA	wt	wt	Zbtb16 Htra1	UpDown	Down	Oligo	Oligo	8ctx	12str
Zbtb16	Itpk1	1	0.945565	15	wtNA	wt	wt	Zbtb16 Itpk1	UpDown	UpDown	Oligo	Oligo	8ctx	12str
Gramd1b	Jakmip2	1	0.885081	1	NAhd	NA	hd	Gramd1b Jakmip2	Up	Up	Oligo	Oligo	12str	12ctx
Esyt2	Jarid2	0.891129	0.957661	3	NAhd	hd	hd	Esyt2 Jarid2	Up	Up	Oligo	Oligo	12str	12str
Jakmip2	Kat6b	0.96371	0.612231	7	NAhd	hd	NA	Jakmip2 Kat6b	Up	Up	Oligo	Oligo	12ctx	12str
Nav3	Kat6b	1	0.957661	10	wtNA	NA	NA	Nav3 Kat6b	Up	Up	Oligo	Oligo	12ctx	12str
Nrg3	Kcnip4	0.987903	0.955645	5	NAhd	NA	hd	Nrg3 Kcnip4	Down	Down	Oligo	Oligo	12ctx	8ctx
Syt1	Kcnip4	0.959677	0.977151	4	NAhd	NA	hd	Syt1 Kcnip4	Down	Down	Oligo	Oligo	12ctx	8ctx
Fnbp1	Kcnk13	0.915323	0.958333	5	NAhd	hd	hd	Fnbp1 Kcnk13	Down	Down	Oligo	Oligo	12ctx	12str
Kcnq1ot1	Kcnq1	0.875	0.788978	1	NAhd	NA	NA	Kcnq1ot1 Kcnq1	Up	Up	Oligo	Oligo	12str	12str
Nav3	Kcnq1	0.951613	0.965726	10	wtNA	NA	NA	Nav3 Kcnq1	Up	Up	Oligo	Oligo	12ctx	12str
Tnr	Kcnq1ot1	0.995968	1	19	wtNA	NA	NA	Tnr Kcnq1ot1	Up	Up	Oligo	Oligo	12str	12str
Prkce	Kdm3b	0.96371	0.913978	24	wtNA	NA	wt	Prkce Kdm3b	Up	Up	Oligo	Oligo	12str	8ctx
Ptpn4	Kif1a	0.850806	0.847446	2	wtNA	NA	wt	Ptpn4 Kif1a	Up	Up	Oligo	Oligo	12str	12str
Enpp6	Kirrel3	1	0.725806	3	wtNA	NA	NA	Enpp6 Kirrel3	Up	UpDown	Oligo	Oligo	12str	12str
Sgk1	Klf13	0.971774	1	8	NAhd	NA	hd	Sgk1 Klf13	Down	Down	Oligo	Oligo	12str	12str
Cacna1c	Large	0.947581	0.965726	9	NAhd	NA	NA	Cacna1c Large	Down	Up	Oligo	Oligo	8str	12ctx
Pcdh7	Large	0.983871	0.938172	7	wtNA	NA	NA	Pcdh7 Large	Up	Up	Oligo	Oligo	12str	12ctx
Mgat5	Ldlrad4	0.991935	0.530914	2	NAhd	hd	hd	Mgat5 Ldlrad4	Down	Down	Oligo	Oligo	8str	12str
Camk2d	Lncpint	1	0.979839	6	wtNA	wt	NA	Camk2d Lncpint	Up	Up	Oligo	Oligo	12str	8ctx
Ppm1l	Lncpint	0.987903	0.979167	3	NAhd	hd	NA	Ppm1l Lncpint	Up	Up	Oligo	Oligo	8str	8ctx
Pak3	Lrch3	0.947581	0.696909	2	wtNA	NA	wt	Pak3 Lrch3	Up	Up	Oligo	Oligo	8ctx	8ctx
Rab30	Lrrc4	1	0.967742	3	wtNA	NA	wt	Rab30 Lrrc4	Up	Up	Oligo	Oligo	12ctx	12str
Csmd1	Lsamp	0.854839	0.992608	2	NAhd	NA	hd	Csmd1 Lsamp	Down	UpDown	Oligo	Oligo	12ctx	8str
Fchsd2	Macf1	1	0.913306	12	wtNA	wt	NA	Fchsd2 Macf1	Up	Up	Oligo	Oligo	12str	12str
Jakmip2	Macf1	0.959677	0.971774	7	NAhd	hd	NA	Jakmip2 Macf1	Up	Up	Oligo	Oligo	12ctx	12str
Tnr	Map1b	0.991935	0.995968	19	wtNA	NA	wt	Tnr Map1b	Up	Up	Oligo	Oligo	12str	8str
Prkce	Map2	0.995968	0.731855	24	wthd	NA	NA	Prkce Map2	Up	Up	Oligo	Oligo	12str	8ctx
Sgk1	Map7d2	0.983871	1	8	NAhd	NA	NA	Sgk1 Map7d2	Down	UpDown	Oligo	Oligo	12str	12str
Prkce	Mapk10	1	0.530242	24	wthd	NA	NA	Prkce Mapk10	Up	Up	Oligo	Oligo	12str	12ctx
Zbtb16	Mast4	0.919355	0.965054	15	wtNA	wt	wt	Zbtb16 Mast4	UpDown	Down	Oligo	Oligo	8ctx	8str
Galnt13	Mboat2	0.895161	1	3	NAhd	NA	hd	Galnt13 Mboat2	Up	Up	Oligo	Oligo	12str	12str
Rnf121	Meg3	0.854839	0.959005	5	NAhd	NA	hd	Rnf121 Meg3	Up	Down	Oligo	Oligo	8str	8ctx
Prkce	Mgat5	0.983871	0.534274	9	NAhd	NA	hd	Prkce Mgat5	Up	Down	Oligo	Oligo	12str	8str
Tnr	Mllt10	0.862903	1	19	wtNA	NA	wt	Tnr Mllt10	Up	Up	Oligo	Oligo	12str	12str
Enpp6	Mob3b	0.875	0.887769	3	wtNA	NA	wt	Enpp6 Mob3b	Up	Up	Oligo	Oligo	12str	12ctx
Kirrel3	Myo18a	0.987903	0.935484	11	NAhd	NA	hd	Kirrel3 Myo18a	UpDown	Down	Oligo	Oligo	12str	8str
Fchsd2	Nav3	0.991935	0.920699	12	wtNA	wt	NA	Fchsd2 Nav3	Up	Up	Oligo	Oligo	12str	12ctx
Dgki	Nckap5	0.927419	1	1	wtNA	NA	NA	Dgki Nckap5	Up	Up	Oligo	Oligo	8str	8ctx
Fnbp1	Nckap5	0.870968	0.969758	5	NAhd	hd	NA	Fnbp1 Nckap5	Down	Up	Oligo	Oligo	12ctx	8ctx
Mpped2	Ncor1	0.883065	0.966398	7	wtNA	wt	wt	Mpped2 Ncor1	Up	Up	Oligo	Oligo	8str	12str
Tox	Nedd4l	0.979839	0.649866	4	wtNA	wt	wt	Tox Nedd4l	Up	Up	Oligo	Oligo	12str	12str
Camk2d	Negr1	1	0.935484	6	wtNA	wt	wt	Camk2d Negr1	Up	Up	Oligo	Oligo	12str	8str
Mpped2	Nipbl	0.987903	0.738575	7	wtNA	wt	wt	Mpped2 Nipbl	Up	Up	Oligo	Oligo	8str	8str
Pex5l	Npas3	0.935484	0.967742	4	wtNA	NA	wt	Pex5l Npas3	Down	Up	Oligo	Oligo	12ctx	12str
Gm20754	Nr3c2	0.995968	0.979839	6	wtNA	wt	wt	Gm20754 Nr3c2	Up	Up	Oligo	Oligo	12str	12str
Nrg3	Nrg1	0.979839	0.623656	5	NAhd	NA	NA	Nrg3 Nrg1	Down	Down	Oligo	Oligo	12ctx	12str
Slc4a10	Nrg1	0.991935	0.639113	7	wtNA	NA	NA	Slc4a10 Nrg1	Up	Down	Oligo	Oligo	12str	12str
Syt1	Nrg1	0.899194	0.635753	4	NAhd	NA	NA	Syt1 Nrg1	Down	Down	Oligo	Oligo	12ctx	12str
Fchsd2	Nrg3	0.991935	0.959677	12	wtNA	wt	NA	Fchsd2 Nrg3	Up	Down	Oligo	Oligo	12str	12ctx
Syt1	Nrg3	1	0.913306	4	NAhd	NA	NA	Syt1 Nrg3	Down	Down	Oligo	Oligo	12ctx	12ctx
PISD	Nrxn1	0.983871	0.985887	11	NAhd	hd	hd	PISD Nrxn1	Up	UpDown	Oligo	Oligo	12str	12str
Mpped2	Nrxn2	1	0.967742	7	wtNA	wt	NA	Mpped2 Nrxn2	Up	Up	Oligo	Oligo	8str	8ctx
Ppm1l	Nrxn2	0.979839	0.975806	3	NAhd	hd	NA	Ppm1l Nrxn2	Up	Up	Oligo	Oligo	8str	8ctx
PISD	Nrxn3	1	0.971774	11	NAhd	hd	hd	PISD Nrxn3	Up	Down	Oligo	Oligo	12str	8ctx
PISD	Nsmce2	0.923387	0.926747	11	NAhd	hd	hd	PISD Nsmce2	Up	Up	Oligo	Oligo	12str	12str
Sgk1	Otud7a	0.858871	1	9	wtNA	NA	wt	Sgk1 Otud7a	Down	Down	Oligo	Oligo	12str	12str
Zbtb16	Oxr1	0.943548	0.987903	15	wtNA	wt	wt	Zbtb16 Oxr1	UpDown	Down	Oligo	Oligo	8ctx	12ctx
Gm16168	Pacrg	1	0.572581	1	wtNA	NA	NA	Gm16168 Pacrg	Down	Down	Oligo	Oligo	12ctx	12ctx
Kcnq1	Pak3	0.854839	0.676075	1	NAhd	NA	NA	Kcnq1 Pak3	Up	Up	Oligo	Oligo	12str	8ctx
Mpped2	Pak3	0.887097	1	7	wtNA	wt	NA	Mpped2 Pak3	Up	Up	Oligo	Oligo	8str	8ctx
Zbtb16	Palm2	0.955645	0.941532	15	wtNA	wt	wt	Zbtb16 Palm2	UpDown	Down	Oligo	Oligo	8ctx	12ctx
PISD	Pbx1	1	0.953629	11	NAhd	hd	NA	PISD Pbx1	Up	Up	Oligo	Oligo	12str	12str
Syn3	Pbx1	1	0.993952	5	wtNA	NA	NA	Syn3 Pbx1	Up	Up	Oligo	Oligo	12str	12str
Atxn7l1	Pcca	1	0.969758	5	wthd	NA	NA	Atxn7l1 Pcca	Up	Up	Oligo	Oligo	12str	12str
Cdh11	Pcca	0.899194	0.965726	4	wtNA	NA	NA	Cdh11 Pcca	Up	Up	Oligo	Oligo	12str	12str
Akt3	Pcdh10	0.995968	0.803091	1	wtNA	wt	wt	Akt3 Pcdh10	Up	Up	Oligo	Oligo	12str	12str
Tnr	Pcdh10	1	0.943548	19	wtNA	NA	wt	Tnr Pcdh10	Up	Up	Oligo	Oligo	12str	12str
Adcy5	Pcdh15	0.891129	0.971774	2	wtNA	NA	wt	Adcy5 Pcdh15	Down	Up	Oligo	Oligo	12str	8ctx
Sgk1	Pcdh17	1	1	9	wtNA	NA	wt	Sgk1 Pcdh17	Down	Up	Oligo	Oligo	12str	12str
Sobp	Pcdh17	0.883065	1	2	wtNA	wt	wt	Sobp Pcdh17	Up	Up	Oligo	Oligo	8str	12str
Atxn7l1	Pcdh7	0.939516	0.534946	5	wtNA	NA	NA	Atxn7l1 Pcdh7	Up	Up	Oligo	Oligo	12str	12str
Cacna1c	Pcdh7	1	0.957661	9	NAhd	NA	NA	Cacna1c Pcdh7	Down	Up	Oligo	Oligo	8str	12str
Camk2d	Pcdh7	0.96371	0.600134	6	wtNA	wt	NA	Camk2d Pcdh7	Up	Up	Oligo	Oligo	12str	12str
Rab30	Pclo	1	0.997984	3	wtNA	NA	wt	Rab30 Pclo	Up	Up	Oligo	Oligo	12ctx	8str
Sdccag8	Pclo	0.919355	0.938844	1	wtNA	wt	wt	Sdccag8 Pclo	Up	Up	Oligo	Oligo	12ctx	8str
Tln2	Pde4b	0.870968	1	1	wtNA	wt	wt	Tln2 Pde4b	Up	Down	Oligo	Oligo	12str	8ctx
Pbx1	Pde4d	0.919355	0.775538	1	wtNA	NA	NA	Pbx1 Pde4d	Up	Up	Oligo	Oligo	12str	12str
PISD	Pde4d	0.866935	0.923387	11	NAhd	hd	NA	PISD Pde4d	Up	Up	Oligo	Oligo	12str	12str
Nav3	Phf14	0.951613	0.965726	10	wtNA	NA	wt	Nav3 Phf14	Up	Up	Oligo	Oligo	12ctx	12str
Fnbp1	Phlpp1	0.862903	0.950269	5	NAhd	hd	hd	Fnbp1 Phlpp1	Down	Down	Oligo	Oligo	12ctx	8str
Osbp2	Pkn2	0.96371	0.948253	2	NAhd	hd	hd	Osbp2 Pkn2	Up	Up	Oligo	Oligo	12ctx	12str
Mapk10	Polb	0.935484	0.715726	2	wtNA	NA	NA	Mapk10 Polb	Up	Up	Oligo	Oligo	12ctx	12str
Prkce	Polb	1	0.729839	24	wthd	NA	NA	Prkce Polb	Up	Up	Oligo	Oligo	12str	12str
Esyt2	Ppfia2	0.971774	0.96371	3	NAhd	hd	hd	Esyt2 Ppfia2	Up	Up	Oligo	Oligo	12str	12ctx
Cacna1c	Ppm1h	0.995968	0.93078	9	NAhd	NA	NA	Cacna1c Ppm1h	Down	Up	Oligo	Oligo	8str	12str
Gm20754	Ppm1h	0.967742	0.745968	6	wtNA	wt	NA	Gm20754 Ppm1h	Up	Up	Oligo	Oligo	12str	12str
Prkce	Ppm1h	0.903226	0.951613	24	wtNA	NA	NA	Prkce Ppm1h	Up	Up	Oligo	Oligo	12str	12str
Cacna1c	Ppm1l	1	0.959677	9	NAhd	NA	hd	Cacna1c Ppm1l	Down	Up	Oligo	Oligo	8str	8str
Ppm1h	Ppm1l	0.947581	0.831317	1	NAhd	NA	hd	Ppm1h Ppm1l	Up	Up	Oligo	Oligo	12str	8str
Nrg3	Ppp2r5a	0.858871	0.989919	5	NAhd	NA	hd	Nrg3 Ppp2r5a	Down	Up	Oligo	Oligo	12ctx	12str
Rnf121	Ppp2r5e	0.915323	0.891801	5	NAhd	NA	hd	Rnf121 Ppp2r5e	Up	Up	Oligo	Oligo	8str	12ctx
Nr3c2	Prpf4b	0.91129	0.945565	2	wtNA	wt	wt	Nr3c2 Prpf4b	Up	Up	Oligo	Oligo	12str	8str
Ppm1h	Prpf4b	0.879032	0.991935	4	wtNA	NA	wt	Ppm1h Prpf4b	Up	Up	Oligo	Oligo	12str	8str
Csmd1	Prr5l	0.866935	0.977823	2	NAhd	NA	NA	Csmd1 Prr5l	Down	NA	NA	Oligo	12ctx	NA
Pcdh7	Prr5l	0.923387	0.997984	7	wtNA	NA	NA	Pcdh7 Prr5l	Up	NA	NA	Oligo	12str	NA
Enpp6	Ptgds	0.995968	0.547043	3	wtNA	NA	wt	Enpp6 Ptgds	Up	Down	Oligo	Oligo	12str	12ctx
Cacna1c	Ptpn4	0.91129	0.637769	9	NAhd	NA	NA	Cacna1c Ptpn4	Down	Up	Oligo	Oligo	8str	12str
Mgat5	Ptpn4	0.979839	0.625672	2	NAhd	hd	NA	Mgat5 Ptpn4	Down	Up	Oligo	Oligo	8str	12str
Prkce	Ptpn4	1	0.790323	24	wtNA	NA	NA	Prkce Ptpn4	Up	Up	Oligo	Oligo	12str	12str
Fnbp1	Qk	1	0.975806	5	NAhd	hd	hd	Fnbp1 Qk	Down	Down	Oligo	Oligo	12ctx	12str
Galnt13	Rab30	0.879032	0.522849	3	NAhd	NA	NA	Galnt13 Rab30	Up	Up	Oligo	Oligo	12str	12ctx
Tnr	Ralgapa1	0.850806	1	19	wtNA	NA	wt	Tnr Ralgapa1	Up	Up	Oligo	Oligo	12str	12ctx
Ddhd2	Rapgef1	0.875	0.909946	3	wtNA	NA	wt	Ddhd2 Rapgef1	Up	Up	Oligo	Oligo	12str	8str
Arhgap26	Rapgef2	0.931452	0.981855	3	wtNA	NA	wt	Arhgap26 Rapgef2	Up	Up	Oligo	Oligo	12str	8ctx
Prkce	Rbm5	0.995968	0.84543	24	wtNA	NA	wt	Prkce Rbm5	Up	Up	Oligo	Oligo	12str	8ctx
Prkce	Rcan2	0.959677	0.875	9	NAhd	NA	NA	Prkce Rcan2	Up	UpDown	Oligo	Oligo	12str	12str
Zbtb16	Rcan2	1	0.927419	15	wtNA	wt	NA	Zbtb16 Rcan2	UpDown	UpDown	Oligo	Oligo	8ctx	12str
Prkce	Rnf121	1	0.969758	24	wthd	NA	NA	Prkce Rnf121	Up	Up	Oligo	Oligo	12str	8str
Sgk1	Rnf220	0.887097	1	9	wtNA	NA	wt	Sgk1 Rnf220	Down	Down	Oligo	Oligo	12str	8str
Nav3	Rora	0.987903	0.975134	10	wtNA	NA	wt	Nav3 Rora	Up	Up	Oligo	Oligo	12ctx	12str
Atxn7l1	RP24-127M20.8	0.995968	0.96371	5	wthd	NA	NA	Atxn7l1 RP24-127M20.8	Up	Up	Oligo	Oligo	12str	12ctx
Ppp1cc	RP24-263G24.2	0.975806	0.612903	1	wtNA	wt	wt	Ppp1cc RP24-263G24.2	Down	Down	Oligo	Oligo	12str	12str
Adam23	Scmh1	0.850806	0.948253	2	NAhd	NA	hd	Adam23 Scmh1	Up	Up	Oligo	Oligo	12str	12str
Rab30	Sdccag8	0.955645	0.981183	3	wtNA	NA	wt	Rab30 Sdccag8	Up	Up	Oligo	Oligo	12ctx	12ctx
Arl15	Sec61a2	0.91129	0.97043	1	wtNA	wt	wt	Arl15 Sec61a2	Up	Up	Oligo	Oligo	12str	8ctx
Kirrel3	Sema5a	0.862903	0.987903	7	wthd	NA	NA	Kirrel3 Sema5a	UpDown	Up	Oligo	Oligo	12str	12ctx
Tnr	Sema6d	0.923387	1	19	wtNA	NA	NA	Tnr Sema6d	Up	Up	Oligo	Oligo	12str	8ctx
Sgk1	Setbp1	0.879032	1	9	wthd	NA	NA	Sgk1 Setbp1	Down	Up	Oligo	Oligo	12str	8str
Tnr	Setbp1	1	1	19	wtNA	NA	NA	Tnr Setbp1	Up	Up	Oligo	Oligo	12str	8str
Prkce	Sgip1	0.991935	0.920699	24	wthd	NA	NA	Prkce Sgip1	Up	Up	Oligo	Oligo	12str	12str
Adcy5	Sgk1	0.987903	0.931452	2	wthd	NA	NA	Adcy5 Sgk1	Down	Down	Oligo	Oligo	12str	12str
Zbtb16	Sgk1	1	0.903226	15	wtNA	wt	NA	Zbtb16 Sgk1	UpDown	Down	Oligo	Oligo	8ctx	12str
Mapk10	Sgms1	0.891129	0.575941	2	wtNA	NA	NA	Mapk10 Sgms1	Up	Up	Oligo	Oligo	12ctx	12str
Prkce	Sgms1	1	0.58871	24	wthd	NA	NA	Prkce Sgms1	Up	Up	Oligo	Oligo	12str	12str
Kirrel3	Slc13a1	0.891129	0.997984	7	wthd	NA	NA	Kirrel3 Slc13a1	UpDown	UpDown	Oligo	Oligo	12str	12ctx
Pcdh7	Slc24a2	0.891129	0.955645	7	wtNA	NA	wt	Pcdh7 Slc24a2	Up	Down	Oligo	Oligo	12str	12str
Pcdh10	Slc38a9	0.995968	0.991935	1	wtNA	wt	wt	Pcdh10 Slc38a9	Up	Up	Oligo	Oligo	12str	12str
Tnr	Slc38a9	1	0.991935	19	wtNA	NA	wt	Tnr Slc38a9	Up	Up	Oligo	Oligo	12str	12str
Nrg1	Slc4a10	0.891129	0.596774	1	NAhd	NA	NA	Nrg1 Slc4a10	Down	Up	Oligo	Oligo	12str	12str
Nrg3	Slc4a10	0.947581	0.639785	5	NAhd	NA	NA	Nrg3 Slc4a10	Down	Up	Oligo	Oligo	12ctx	12str
Syt1	Slc4a10	0.899194	0.638441	4	NAhd	NA	NA	Syt1 Slc4a10	Down	Up	Oligo	Oligo	12ctx	12str
Zbtb16	Slc6a1	0.991935	0.916667	15	wtNA	wt	wt	Zbtb16 Slc6a1	UpDown	UpDown	Oligo	Oligo	8ctx	12str
Mpped2	Slc8a3	1	0.971774	7	wtNA	wt	wt	Mpped2 Slc8a3	Up	Down	Oligo	Oligo	8str	8str
Prkce	Smarca2	0.991935	0.957661	24	wtNA	NA	NA	Prkce Smarca2	Up	Up	Oligo	Oligo	12str	12str
Rnf121	Smarca2	0.987903	0.842742	3	wthd	NA	NA	Rnf121 Smarca2	Up	Up	Oligo	Oligo	8str	12str
Tox	Smurf2	0.975806	1	4	wtNA	wt	wt	Tox Smurf2	Up	Up	Oligo	Oligo	12str	12str
Fhit	Sobp	1	0.951613	1	wtNA	wt	wt	Fhit Sobp	Up	Up	Oligo	Oligo	12str	8str
Gm20754	Sobp	1	0.957661	6	wtNA	wt	wt	Gm20754 Sobp	Up	Up	Oligo	Oligo	12str	8str
Sec61a2	Son	0.862903	1	2	wtNA	wt	wt	Sec61a2 Son	Up	Up	Oligo	Oligo	8ctx	12ctx
Prkce	Sos2	0.959677	0.971102	24	wtNA	NA	wt	Prkce Sos2	Up	Up	Oligo	Oligo	12str	12str
Fgf14	Sox10	0.862903	0.993952	1	NAhd	NA	hd	Fgf14 Sox10	Down	Down	Oligo	Oligo	12str	8ctx
Neat1	Spock1	1	0.975806	1	NAhd	hd	hd	Neat1 Spock1	Down	Down	Oligo	Oligo	8ctx	12str
Tnr	Sptbn1	1	0.991935	19	wtNA	NA	wt	Tnr Sptbn1	Up	Up	Oligo	Oligo	12str	12str
Kirrel3	Srgap1	0.975806	0.942876	11	NAhd	NA	hd	Kirrel3 Srgap1	UpDown	Down	Oligo	Oligo	12str	8ctx
Mpped2	St3gal3	0.971774	0.991935	7	wtNA	wt	wt	Mpped2 St3gal3	Up	Down	Oligo	Oligo	8str	12ctx
Qk	St6galnac3	0.895161	0.987231	3	NAhd	hd	hd	Qk St6galnac3	Down	Down	Oligo	Oligo	12str	8str
Zbtb16	Sulf2	0.955645	0.932796	15	wtNA	wt	wt	Zbtb16 Sulf2	UpDown	UpDown	Oligo	Oligo	8ctx	12str
Arhgap26	Sybu	0.975806	0.921371	3	wtNA	NA	wt	Arhgap26 Sybu	Up	Up	Oligo	Oligo	12str	8ctx
C130071C03Rik	Syn3	1	0.917339	1	NAhd	NA	NA	C130071C03Rik Syn3	Up	Up	Oligo	Oligo	12ctx	12str
Fchsd2	Syn3	1	0.889113	12	wtNA	wt	NA	Fchsd2 Syn3	Up	Up	Oligo	Oligo	12str	12str
Kirrel3	Synpr	1	0.997984	7	wthd	NA	NA	Kirrel3 Synpr	UpDown	UpDown	Oligo	Oligo	12str	12ctx
Slc4a10	Syt1	1	0.995968	7	wtNA	NA	NA	Slc4a10 Syt1	Up	Down	Oligo	Oligo	12str	12ctx
Sgk1	Sytl2	0.883065	1	9	wtNA	NA	wt	Sgk1 Sytl2	Down	UpDown	Oligo	Oligo	12str	12ctx
Ddhd2	Taf15	0.915323	0.926747	3	wthd	NA	NA	Ddhd2 Taf15	Up	Up	Oligo	Oligo	12str	12ctx
Syn3	Tanc2	1	0.967742	5	wtNA	NA	wt	Syn3 Tanc2	Up	Up	Oligo	Oligo	12str	8str
Cacna1c	Tenm2	0.987903	0.87836	9	NAhd	NA	hd	Cacna1c Tenm2	Down	Down	Oligo	Oligo	8str	8ctx
Tnr	Tfdp2	0.995968	1	19	wtNA	NA	wt	Tnr Tfdp2	Up	Up	Oligo	Oligo	12str	8ctx
Gm16599	Tjp1	0.899194	0.979839	1	wtNA	NA	wt	Gm16599 Tjp1	Up	Up	Oligo	Oligo	12ctx	12ctx
Gm20754	Tln2	1	0.997984	6	wtNA	wt	wt	Gm20754 Tln2	Up	Up	Oligo	Oligo	12str	12str
Tnr	Tmbim1	0.858871	1	19	wtNA	NA	wt	Tnr Tmbim1	Up	Down	Oligo	Oligo	12str	8ctx
Qk	Tmeff2	0.879032	0.977151	3	NAhd	hd	hd	Qk Tmeff2	Down	Down	Oligo	Oligo	12str	8str
Mpped2	Tmem108	0.995968	0.971774	7	wtNA	wt	wt	Mpped2 Tmem108	Up	Up	Oligo	Oligo	8str	12str
Pak3	Tmem108	0.895161	0.649866	2	wtNA	NA	wt	Pak3 Tmem108	Up	Up	Oligo	Oligo	8ctx	12str
Zbtb16	Tmod2	1	0.97379	15	wtNA	wt	wt	Zbtb16 Tmod2	UpDown	UpDown	Oligo	Oligo	8ctx	12ctx
Camk2d	Tnik	1	0.947581	6	wtNA	wt	NA	Camk2d Tnik	Up	Up	Oligo	Oligo	12str	12str
Pcdh7	Tnik	0.995968	0.935484	7	wtNA	NA	NA	Pcdh7 Tnik	Up	Up	Oligo	Oligo	12str	12str
Ppm1l	Tnik	0.951613	0.733199	3	NAhd	hd	NA	Ppm1l Tnik	Up	Up	Oligo	Oligo	8str	12str
Sgk1	Tnr	1	0.983871	9	wthd	NA	NA	Sgk1 Tnr	Down	Up	Oligo	Oligo	12str	12str
Araf	Tox	0.995968	0.553763	1	wtNA	wt	wt	Araf Tox	Up	Up	Oligo	Oligo	12str	12str
Tnr	Tox	0.887097	1	19	wtNA	NA	wt	Tnr Tox	Up	Up	Oligo	Oligo	12str	12str
Grm5	Ttc19	0.959677	0.507392	1	NAhd	NA	NA	Grm5 Ttc19	Down	Up	Oligo	Oligo	12str	12str
Nav3	Ttc19	0.935484	0.969086	10	wtNA	NA	NA	Nav3 Ttc19	Up	Up	Oligo	Oligo	12ctx	12str
Slc4a10	Ttc19	0.96371	0.668011	7	wtNA	NA	NA	Slc4a10 Ttc19	Up	Up	Oligo	Oligo	12str	12str
Prkce	Ube2e2	0.943548	0.733199	24	wtNA	NA	wt	Prkce Ube2e2	Up	NA	NA	Oligo	12str	NA
Nr3c2	Ulk2	0.915323	0.875	2	wtNA	wt	wt	Nr3c2 Ulk2	Up	Up	Oligo	Oligo	12str	8ctx
Cadps	Vwa8	0.951613	0.757392	1	wtNA	wt	NA	Cadps Vwa8	Up	Up	Oligo	Oligo	12ctx	12str
Cdh11	Vwa8	0.967742	0.961022	4	wtNA	NA	NA	Cdh11 Vwa8	Up	Up	Oligo	Oligo	12str	12str
PISD	Vwa8	1	0.96371	11	NAhd	hd	NA	PISD Vwa8	Up	Up	Oligo	Oligo	12str	12str
Fchsd2	Xkr4	1	0.929435	12	wtNA	wt	NA	Fchsd2 Xkr4	Up	Up	Oligo	Oligo	12str	12str
Jakmip2	Xkr4	0.96371	0.962366	7	NAhd	hd	NA	Jakmip2 Xkr4	Up	Up	Oligo	Oligo	12ctx	12str
Adipor2	Zbtb16	1	0.745968	1	wtNA	wt	wt	Adipor2 Zbtb16	UpDown	UpDown	Oligo	Oligo	12str	8ctx
Kirrel3	Zdhhc20	0.923387	1	7	wtNA	NA	wt	Kirrel3 Zdhhc20	UpDown	Down	Oligo	Oligo	12str	12str
Cdh11	Zfp462	0.919355	0.955645	4	wtNA	NA	wt	Cdh11 Zfp462	Up	Up	Oligo	Oligo	12str	12str
Esyt2	Zfp950	0.991935	0.814516	3	NAhd	hd	NA	Esyt2 Zfp950	Up	Up	Oligo	Oligo	12str	8str
Osbp2	Zfp950	0.947581	0.521505	2	NAhd	hd	NA	Osbp2 Zfp950	Up	Up	Oligo	Oligo	12ctx	8str
MAZ	Acaca	1	1	20	regulon	regulon	regulon				Oligo	Oligo
MAZ	Adam23	1	1	20	regulon	regulon	regulon				Oligo	Oligo
EGR1	Adam23	1	1	20	regulon	regulon	regulon				Oligo	Oligo
E2F3	Adam23	1	1	20	regulon	regulon	regulon				Oligo	Oligo
ETS2	Akt3	1	1	20	regulon	regulon	regulon				Oligo	Oligo
MAZ	Akt3	1	1	20	regulon	regulon	regulon				Oligo	Oligo
MAZ	Arsb	1	1	20	regulon	regulon	regulon				Oligo	Oligo
SALL1	Arsb	1	1	20	regulon	regulon	regulon				Oligo	Oligo
E2F3	Arsb	1	1	20	regulon	regulon	regulon				Oligo	Oligo
SP3	Cacna1c	1	1	20	regulon	regulon	regulon				Oligo	Oligo
KLF5	Ccser1	1	1	20	regulon	regulon	regulon				Oligo	Oligo
MAZ	Ccser1	1	1	20	regulon	regulon	regulon				Oligo	Oligo
SP5	Ccser1	1	1	20	regulon	regulon	regulon				Oligo	Oligo
SP1	Ccser1	1	1	20	regulon	regulon	regulon				Oligo	Oligo
SALL1	Ccser1	1	1	20	regulon	regulon	regulon				Oligo	Oligo
ETS2	Ccser1	1	1	20	regulon	regulon	regulon				Oligo	Oligo
EGR2	Ccser1	1	1	20	regulon	regulon	regulon				Oligo	Oligo
RFX1	Ccser1	1	1	20	regulon	regulon	regulon				Oligo	Oligo
SP2	Ccser1	1	1	20	regulon	regulon	regulon				Oligo	Oligo
KLF15	Ccser1	1	1	20	regulon	regulon	regulon				Oligo	Oligo
SP3	Ccser1	1	1	20	regulon	regulon	regulon				Oligo	Oligo
E2F3	Ccser1	1	1	20	regulon	regulon	regulon				Oligo	Oligo
WT1	Ccser1	1	1	20	regulon	regulon	regulon				Oligo	Oligo
SALL4	Ccser1	1	1	20	regulon	regulon	regulon				Oligo	Oligo
ELF5	Ccser1	1	1	20	regulon	regulon	regulon				Oligo	Oligo
MAZ	Cdh11	1	1	20	regulon	regulon	regulon				Oligo	Oligo
IRF3	Chd9	1	1	20	regulon	regulon	regulon				Oligo	Oligo
SP5	Chd9	1	1	20	regulon	regulon	regulon				Oligo	Oligo
MAZ	Chd9	1	1	20	regulon	regulon	regulon				Oligo	Oligo
PRD16	Chd9	1	1	20	regulon	regulon	regulon				Oligo	Oligo
FLI1	Chd9	1	1	20	regulon	regulon	regulon				Oligo	Oligo
HNF6	Chd9	1	1	20	regulon	regulon	regulon				Oligo	Oligo
ETS2	Chd9	1	1	20	regulon	regulon	regulon				Oligo	Oligo
ELF5	Chd9	1	1	20	regulon	regulon	regulon				Oligo	Oligo
KLF15	Chd9	1	1	20	regulon	regulon	regulon				Oligo	Oligo
SALL4	Chd9	1	1	20	regulon	regulon	regulon				Oligo	Oligo
SP5	Csmd1	1	1	20	regulon	regulon	regulon				Oligo	Oligo
ELF5	Csmd1	1	1	20	regulon	regulon	regulon				Oligo	Oligo
ASCL1	Csmd1	1	1	20	regulon	regulon	regulon				Oligo	Oligo
GATA1	Csmd1	1	1	20	regulon	regulon	regulon				Oligo	Oligo
PRD16	Csmd1	1	1	20	regulon	regulon	regulon				Oligo	Oligo
E2F3	Csmd1	1	1	20	regulon	regulon	regulon				Oligo	Oligo
STAT1	Csmd1	1	1	20	regulon	regulon	regulon				Oligo	Oligo
SMAD1	Csmd1	1	1	20	regulon	regulon	regulon				Oligo	Oligo
KLF3	Csmd1	1	1	20	regulon	regulon	regulon				Oligo	Oligo
KLF6	Csmd1	1	1	20	regulon	regulon	regulon				Oligo	Oligo
TFE2	Csmd1	1	1	20	regulon	regulon	regulon				Oligo	Oligo
RREB1	Csmd1	1	1	20	regulon	regulon	regulon				Oligo	Oligo
ZN281	Csmd1	1	1	20	regulon	regulon	regulon				Oligo	Oligo
SP3	Csmd1	1	1	20	regulon	regulon	regulon				Oligo	Oligo
OLIG2	Csmd1	1	1	20	regulon	regulon	regulon				Oligo	Oligo
RFX1	Csmd1	1	1	20	regulon	regulon	regulon				Oligo	Oligo
KLF15	Csmd1	1	1	20	regulon	regulon	regulon				Oligo	Oligo
SP1	Csmd1	1	1	20	regulon	regulon	regulon				Oligo	Oligo
EGR4	Csmd1	1	1	20	regulon	regulon	regulon				Oligo	Oligo
ZFX	Csmd1	1	1	20	regulon	regulon	regulon				Oligo	Oligo
SALL1	Csmd1	1	1	20	regulon	regulon	regulon				Oligo	Oligo
MAZ	Csmd1	1	1	20	regulon	regulon	regulon				Oligo	Oligo
SMAD2	Csmd1	1	1	20	regulon	regulon	regulon				Oligo	Oligo
ETV5	Csmd1	1	1	20	regulon	regulon	regulon				Oligo	Oligo
FUBP1	Csmd1	1	1	20	regulon	regulon	regulon				Oligo	Oligo
BHA15	Csmd1	1	1	20	regulon	regulon	regulon				Oligo	Oligo
ZFHX3	Csmd1	1	1	20	regulon	regulon	regulon				Oligo	Oligo
ZBT17	Csmd1	1	1	20	regulon	regulon	regulon				Oligo	Oligo
TBX5	Csmd1	1	1	20	regulon	regulon	regulon				Oligo	Oligo
E2F7	Csmd1	1	1	20	regulon	regulon	regulon				Oligo	Oligo
ETS2	Csmd1	1	1	20	regulon	regulon	regulon				Oligo	Oligo
FOXJ3	Csmd1	1	1	20	regulon	regulon	regulon				Oligo	Oligo
SALL4	Csmd1	1	1	20	regulon	regulon	regulon				Oligo	Oligo
SPI1	Csmd1	1	1	20	regulon	regulon	regulon				Oligo	Oligo
E2F6	Csmd1	1	1	20	regulon	regulon	regulon				Oligo	Oligo
WT1	Csmd1	1	1	20	regulon	regulon	regulon				Oligo	Oligo
KLF1	Csmd1	1	1	20	regulon	regulon	regulon				Oligo	Oligo
FLI1	Csmd1	1	1	20	regulon	regulon	regulon				Oligo	Oligo
MEF2A	Csmd1	1	1	20	regulon	regulon	regulon				Oligo	Oligo
MYF5	Csmd1	1	1	20	regulon	regulon	regulon				Oligo	Oligo
EGR2	Csmd1	1	1	20	regulon	regulon	regulon				Oligo	Oligo
SP2	Csmd1	1	1	20	regulon	regulon	regulon				Oligo	Oligo
EGR1	Csmd1	1	1	20	regulon	regulon	regulon				Oligo	Oligo
KLF5	Csmd1	1	1	20	regulon	regulon	regulon				Oligo	Oligo
HAND1	Csmd1	1	1	20	regulon	regulon	regulon				Oligo	Oligo
PTF1A	Csmd1	1	1	20	regulon	regulon	regulon				Oligo	Oligo
IRF3	Csmd1	1	1	20	regulon	regulon	regulon				Oligo	Oligo
MAZ	Fchsd2	1	1	20	regulon	regulon	regulon				Oligo	Oligo
ZBT17	Fchsd2	1	1	20	regulon	regulon	regulon				Oligo	Oligo
SP3	Fchsd2	1	1	20	regulon	regulon	regulon				Oligo	Oligo
EGR2	Fchsd2	1	1	20	regulon	regulon	regulon				Oligo	Oligo
FOXJ3	Fchsd2	1	1	20	regulon	regulon	regulon				Oligo	Oligo
E2F6	Fchsd2	1	1	20	regulon	regulon	regulon				Oligo	Oligo
MEF2A	Fchsd2	1	1	20	regulon	regulon	regulon				Oligo	Oligo
FUBP1	Fchsd2	1	1	20	regulon	regulon	regulon				Oligo	Oligo
SP5	Fchsd2	1	1	20	regulon	regulon	regulon				Oligo	Oligo
KLF15	Fchsd2	1	1	20	regulon	regulon	regulon				Oligo	Oligo
SP2	Fchsd2	1	1	20	regulon	regulon	regulon				Oligo	Oligo
SMAD2	Fchsd2	1	1	20	regulon	regulon	regulon				Oligo	Oligo
E2F3	Fchsd2	1	1	20	regulon	regulon	regulon				Oligo	Oligo
ELF5	Fchsd2	1	1	20	regulon	regulon	regulon				Oligo	Oligo
PTF1A	Fchsd2	1	1	20	regulon	regulon	regulon				Oligo	Oligo
SP1	Fchsd2	1	1	20	regulon	regulon	regulon				Oligo	Oligo
FLI1	Fchsd2	1	1	20	regulon	regulon	regulon				Oligo	Oligo
EGR1	Fchsd2	1	1	20	regulon	regulon	regulon				Oligo	Oligo
ETS2	Fchsd2	1	1	20	regulon	regulon	regulon				Oligo	Oligo
WT1	Fchsd2	1	1	20	regulon	regulon	regulon				Oligo	Oligo
E2F3	Fgf14	1	1	20	regulon	regulon	regulon				Oligo	Oligo
PRD16	Fgf14	1	1	20	regulon	regulon	regulon				Oligo	Oligo
SALL1	Fgf14	1	1	20	regulon	regulon	regulon				Oligo	Oligo
BHA15	Fgf14	1	1	20	regulon	regulon	regulon				Oligo	Oligo
FOXJ3	Fgf14	1	1	20	regulon	regulon	regulon				Oligo	Oligo
SMAD3	Fgf14	1	1	20	regulon	regulon	regulon				Oligo	Oligo
MAZ	Fgf14	1	1	20	regulon	regulon	regulon				Oligo	Oligo
SP3	Fgf14	1	1	20	regulon	regulon	regulon				Oligo	Oligo
SP5	Fgf14	1	1	20	regulon	regulon	regulon				Oligo	Oligo
ZBT17	Fgf14	1	1	20	regulon	regulon	regulon				Oligo	Oligo
MEF2A	Fgf14	1	1	20	regulon	regulon	regulon				Oligo	Oligo
SPI1	Fgf14	1	1	20	regulon	regulon	regulon				Oligo	Oligo
KLF6	Fgf14	1	1	20	regulon	regulon	regulon				Oligo	Oligo
SP1	Fgf14	1	1	20	regulon	regulon	regulon				Oligo	Oligo
ZN281	Fgf14	1	1	20	regulon	regulon	regulon				Oligo	Oligo
TFE2	Fgf14	1	1	20	regulon	regulon	regulon				Oligo	Oligo
FLI1	Fgf14	1	1	20	regulon	regulon	regulon				Oligo	Oligo
ETS2	Fgf14	1	1	20	regulon	regulon	regulon				Oligo	Oligo
FUBP1	Fgf14	1	1	20	regulon	regulon	regulon				Oligo	Oligo
ELF5	Fgf14	1	1	20	regulon	regulon	regulon				Oligo	Oligo
WT1	Fgf14	1	1	20	regulon	regulon	regulon				Oligo	Oligo
HNF6	Fgf14	1	1	20	regulon	regulon	regulon				Oligo	Oligo
SALL4	Fgf14	1	1	20	regulon	regulon	regulon				Oligo	Oligo
KLF5	Fgf14	1	1	20	regulon	regulon	regulon				Oligo	Oligo
SP2	Fgf14	1	1	20	regulon	regulon	regulon				Oligo	Oligo
OLIG2	Fgf14	1	1	20	regulon	regulon	regulon				Oligo	Oligo
EGR1	Fgf14	1	1	20	regulon	regulon	regulon				Oligo	Oligo
ASCL1	Fgf14	1	1	20	regulon	regulon	regulon				Oligo	Oligo
EGR2	Fgf14	1	1	20	regulon	regulon	regulon				Oligo	Oligo
KLF15	Fgf14	1	1	20	regulon	regulon	regulon				Oligo	Oligo
FOXF1	Fgf14	1	1	20	regulon	regulon	regulon				Oligo	Oligo
KLF1	Fgf14	1	1	20	regulon	regulon	regulon				Oligo	Oligo
MAZ	Fnbp1	1	1	20	regulon	regulon	regulon				Oligo	Oligo
SALL1	Fnbp1	1	1	20	regulon	regulon	regulon				Oligo	Oligo
SP1	Fnbp1	1	1	20	regulon	regulon	regulon				Oligo	Oligo
WT1	Fnbp1	1	1	20	regulon	regulon	regulon				Oligo	Oligo
SP3	Fnbp1	1	1	20	regulon	regulon	regulon				Oligo	Oligo
FLI1	Fnbp1	1	1	20	regulon	regulon	regulon				Oligo	Oligo
KLF15	Fnbp1	1	1	20	regulon	regulon	regulon				Oligo	Oligo
ETS2	Fnbp1	1	1	20	regulon	regulon	regulon				Oligo	Oligo
SP2	Fnbp1	1	1	20	regulon	regulon	regulon				Oligo	Oligo
FUBP1	Frmd4a	1	1	20	regulon	regulon	regulon				Oligo	Oligo
MAZ	Frmd4a	1	1	20	regulon	regulon	regulon				Oligo	Oligo
FLI1	Frmd4a	1	1	20	regulon	regulon	regulon				Oligo	Oligo
MYF5	Gls	1	1	20	regulon	regulon	regulon				Oligo	Oligo
SP1	Gls	1	1	20	regulon	regulon	regulon				Oligo	Oligo
MAZ	Gm20754	1	1	20	regulon	regulon	regulon				Oligo	Oligo
SPI1	Gramd1b	1	1	20	regulon	regulon	regulon				Oligo	Oligo
WT1	Grm5	1	1	20	regulon	regulon	regulon				Oligo	Oligo
SP1	Grm5	1	1	20	regulon	regulon	regulon				Oligo	Oligo
PTF1A	Grm5	1	1	20	regulon	regulon	regulon				Oligo	Oligo
MAZ	Grm5	1	1	20	regulon	regulon	regulon				Oligo	Oligo
ETS2	Kcnab1	1	1	20	regulon	regulon	regulon				Oligo	Oligo
SRY	Kcnab1	1	1	20	regulon	regulon	regulon				Oligo	Oligo
E2F3	Kcnq1	1	1	20	regulon	regulon	regulon				Oligo	Oligo
MAZ	Kcnq1	1	1	20	regulon	regulon	regulon				Oligo	Oligo
MAZ	Kirrel3	1	1	20	regulon	regulon	regulon				Oligo	Oligo
RFX1	Kirrel3	1	1	20	regulon	regulon	regulon				Oligo	Oligo
EGR2	Ldlrad4	1	1	20	regulon	regulon	regulon				Oligo	Oligo
E2F3	Map7d2	1	1	20	regulon	regulon	regulon				Oligo	Oligo
MAZ	Map7d2	1	1	20	regulon	regulon	regulon				Oligo	Oligo
EGR1	Map7d2	1	1	20	regulon	regulon	regulon				Oligo	Oligo
WT1	Map7d2	1	1	20	regulon	regulon	regulon				Oligo	Oligo
KLF5	Nav3	1	1	20	regulon	regulon	regulon				Oligo	Oligo
ELF5	Nav3	1	1	20	regulon	regulon	regulon				Oligo	Oligo
RFX1	Nav3	1	1	20	regulon	regulon	regulon				Oligo	Oligo
BHA15	Nav3	1	1	20	regulon	regulon	regulon				Oligo	Oligo
HAND1	Nav3	1	1	20	regulon	regulon	regulon				Oligo	Oligo
WT1	Nav3	1	1	20	regulon	regulon	regulon				Oligo	Oligo
EGR2	Nav3	1	1	20	regulon	regulon	regulon				Oligo	Oligo
SALL4	Nav3	1	1	20	regulon	regulon	regulon				Oligo	Oligo
FOXF1	Nav3	1	1	20	regulon	regulon	regulon				Oligo	Oligo
STAT1	Nav3	1	1	20	regulon	regulon	regulon				Oligo	Oligo
PTF1A	Nav3	1	1	20	regulon	regulon	regulon				Oligo	Oligo
E2F7	Nav3	1	1	20	regulon	regulon	regulon				Oligo	Oligo
FOXJ3	Nav3	1	1	20	regulon	regulon	regulon				Oligo	Oligo
OLIG2	Nav3	1	1	20	regulon	regulon	regulon				Oligo	Oligo
SALL1	Nav3	1	1	20	regulon	regulon	regulon				Oligo	Oligo
ETS2	Nav3	1	1	20	regulon	regulon	regulon				Oligo	Oligo
E2F3	Nav3	1	1	20	regulon	regulon	regulon				Oligo	Oligo
KLF15	Nav3	1	1	20	regulon	regulon	regulon				Oligo	Oligo
SP3	Nav3	1	1	20	regulon	regulon	regulon				Oligo	Oligo
ZN281	Nav3	1	1	20	regulon	regulon	regulon				Oligo	Oligo
EGR1	Nav3	1	1	20	regulon	regulon	regulon				Oligo	Oligo
GATA1	Nav3	1	1	20	regulon	regulon	regulon				Oligo	Oligo
MAZ	Nav3	1	1	20	regulon	regulon	regulon				Oligo	Oligo
SP1	Nav3	1	1	20	regulon	regulon	regulon				Oligo	Oligo
FLI1	Nav3	1	1	20	regulon	regulon	regulon				Oligo	Oligo
IRF3	Nav3	1	1	20	regulon	regulon	regulon				Oligo	Oligo
ETV5	Nav3	1	1	20	regulon	regulon	regulon				Oligo	Oligo
RREB1	Nav3	1	1	20	regulon	regulon	regulon				Oligo	Oligo
SMAD3	Nav3	1	1	20	regulon	regulon	regulon				Oligo	Oligo
PRD16	Nav3	1	1	20	regulon	regulon	regulon				Oligo	Oligo
SMAD2	Nav3	1	1	20	regulon	regulon	regulon				Oligo	Oligo
ZBT17	Nav3	1	1	20	regulon	regulon	regulon				Oligo	Oligo
KLF6	Nav3	1	1	20	regulon	regulon	regulon				Oligo	Oligo
ASCL1	Nav3	1	1	20	regulon	regulon	regulon				Oligo	Oligo
TFE2	Nav3	1	1	20	regulon	regulon	regulon				Oligo	Oligo
FUBP1	Nav3	1	1	20	regulon	regulon	regulon				Oligo	Oligo
SP5	Nav3	1	1	20	regulon	regulon	regulon				Oligo	Oligo
SPI1	Nav3	1	1	20	regulon	regulon	regulon				Oligo	Oligo
SMAD1	Nav3	1	1	20	regulon	regulon	regulon				Oligo	Oligo
SP2	Nav3	1	1	20	regulon	regulon	regulon				Oligo	Oligo
MEF2A	Nav3	1	1	20	regulon	regulon	regulon				Oligo	Oligo
SMAD4	Neat1	1	1	20	regulon	regulon	regulon				Oligo	Oligo
ETS2	Neat1	1	1	20	regulon	regulon	regulon				Oligo	Oligo
KLF15	Neat1	1	1	20	regulon	regulon	regulon				Oligo	Oligo
AP2B	Neat1	1	1	20	regulon	regulon	regulon				Oligo	Oligo
SRY	Neat1	1	1	20	regulon	regulon	regulon				Oligo	Oligo
EGR2	Neat1	1	1	20	regulon	regulon	regulon				Oligo	Oligo
SP3	Neat1	1	1	20	regulon	regulon	regulon				Oligo	Oligo
MAZ	Neat1	1	1	20	regulon	regulon	regulon				Oligo	Oligo
FOXJ3	Neat1	1	1	20	regulon	regulon	regulon				Oligo	Oligo
SP1	Neat1	1	1	20	regulon	regulon	regulon				Oligo	Oligo
SP1	Nr3c2	1	1	20	regulon	regulon	regulon				Oligo	Oligo
MAZ	Nr3c2	1	1	20	regulon	regulon	regulon				Oligo	Oligo
E2F3	Nrg1	1	1	20	regulon	regulon	regulon				Oligo	Oligo
MAZ	Nrg1	1	1	20	regulon	regulon	regulon				Oligo	Oligo
SP2	Nrg3	1	1	20	regulon	regulon	regulon				Oligo	Oligo
E2F3	Nrg3	1	1	20	regulon	regulon	regulon				Oligo	Oligo
EGR2	Nrg3	1	1	20	regulon	regulon	regulon				Oligo	Oligo
SALL1	Nrg3	1	1	20	regulon	regulon	regulon				Oligo	Oligo
SP1	Nrg3	1	1	20	regulon	regulon	regulon				Oligo	Oligo
MAZ	Nrg3	1	1	20	regulon	regulon	regulon				Oligo	Oligo
RFX1	Nrg3	1	1	20	regulon	regulon	regulon				Oligo	Oligo
SP3	Nrg3	1	1	20	regulon	regulon	regulon				Oligo	Oligo
WT1	Nrg3	1	1	20	regulon	regulon	regulon				Oligo	Oligo
E2F3	Pak3	1	1	20	regulon	regulon	regulon				Oligo	Oligo
MAZ	Pak3	1	1	20	regulon	regulon	regulon				Oligo	Oligo
SALL4	Pbx1	1	1	20	regulon	regulon	regulon				Oligo	Oligo
SP1	Pbx1	1	1	20	regulon	regulon	regulon				Oligo	Oligo
MAZ	Pbx1	1	1	20	regulon	regulon	regulon				Oligo	Oligo
IRF3	Pbx1	1	1	20	regulon	regulon	regulon				Oligo	Oligo
SP2	Pbx1	1	1	20	regulon	regulon	regulon				Oligo	Oligo
WT1	Pbx1	1	1	20	regulon	regulon	regulon				Oligo	Oligo
PRD16	Pbx1	1	1	20	regulon	regulon	regulon				Oligo	Oligo
SP5	Pbx1	1	1	20	regulon	regulon	regulon				Oligo	Oligo
ELF5	Pbx1	1	1	20	regulon	regulon	regulon				Oligo	Oligo
SP3	Pbx1	1	1	20	regulon	regulon	regulon				Oligo	Oligo
MAZ	Pcdh10	1	1	20	regulon	regulon	regulon				Oligo	Oligo
SP2	Pcdh10	1	1	20	regulon	regulon	regulon				Oligo	Oligo
SALL1	Pcdh7	1	1	20	regulon	regulon	regulon				Oligo	Oligo
SP1	Pcdh7	1	1	20	regulon	regulon	regulon				Oligo	Oligo
PTF1A	Pcdh7	1	1	20	regulon	regulon	regulon				Oligo	Oligo
SP5	Pcdh7	1	1	20	regulon	regulon	regulon				Oligo	Oligo
FOXJ3	Pcdh7	1	1	20	regulon	regulon	regulon				Oligo	Oligo
E2F3	Pcdh7	1	1	20	regulon	regulon	regulon				Oligo	Oligo
EGR2	Pcdh7	1	1	20	regulon	regulon	regulon				Oligo	Oligo
SMAD2	Pcdh7	1	1	20	regulon	regulon	regulon				Oligo	Oligo
SALL4	Pcdh7	1	1	20	regulon	regulon	regulon				Oligo	Oligo
KLF5	Pcdh7	1	1	20	regulon	regulon	regulon				Oligo	Oligo
KLF15	Pcdh7	1	1	20	regulon	regulon	regulon				Oligo	Oligo
ZN281	Pcdh7	1	1	20	regulon	regulon	regulon				Oligo	Oligo
E2F6	Pcdh7	1	1	20	regulon	regulon	regulon				Oligo	Oligo
FLI1	Pcdh7	1	1	20	regulon	regulon	regulon				Oligo	Oligo
EGR4	Pcdh7	1	1	20	regulon	regulon	regulon				Oligo	Oligo
MAZ	Pcdh7	1	1	20	regulon	regulon	regulon				Oligo	Oligo
IRF7	Pcdh7	1	1	20	regulon	regulon	regulon				Oligo	Oligo
SP3	Pcdh7	1	1	20	regulon	regulon	regulon				Oligo	Oligo
KLF3	Pcdh7	1	1	20	regulon	regulon	regulon				Oligo	Oligo
FUBP1	Pcdh7	1	1	20	regulon	regulon	regulon				Oligo	Oligo
ELF5	Pcdh7	1	1	20	regulon	regulon	regulon				Oligo	Oligo
PRD16	Pcdh7	1	1	20	regulon	regulon	regulon				Oligo	Oligo
KLF6	Pcdh7	1	1	20	regulon	regulon	regulon				Oligo	Oligo
HNF6	Pcdh7	1	1	20	regulon	regulon	regulon				Oligo	Oligo
ZFX	Pcdh7	1	1	20	regulon	regulon	regulon				Oligo	Oligo
WT1	Pcdh7	1	1	20	regulon	regulon	regulon				Oligo	Oligo
GATA1	Pcdh7	1	1	20	regulon	regulon	regulon				Oligo	Oligo
ETS2	Pcdh7	1	1	20	regulon	regulon	regulon				Oligo	Oligo
SP2	Pcdh7	1	1	20	regulon	regulon	regulon				Oligo	Oligo
IRF3	Pcdh7	1	1	20	regulon	regulon	regulon				Oligo	Oligo
EGR1	Pcdh7	1	1	20	regulon	regulon	regulon				Oligo	Oligo
WT1	Pex5l	1	1	20	regulon	regulon	regulon				Oligo	Oligo
ELF5	Prkce	1	1	20	regulon	regulon	regulon				Oligo	Oligo
E2F3	Prkce	1	1	20	regulon	regulon	regulon				Oligo	Oligo
TFE2	Ptpn4	1	1	20	regulon	regulon	regulon				Oligo	Oligo
SP1	Ptpn4	1	1	20	regulon	regulon	regulon				Oligo	Oligo
OLIG2	Ranbp17	1	1	20	regulon	regulon	regulon				Oligo	Oligo
E2F3	Rnf121	1	1	20	regulon	regulon	regulon				Oligo	Oligo
MAZ	Rnf121	1	1	20	regulon	regulon	regulon				Oligo	Oligo
KLF6	Rnf121	1	1	20	regulon	regulon	regulon				Oligo	Oligo
MAZ	Sybu	1	1	20	regulon	regulon	regulon				Oligo	Oligo
E2F3	Tln2	1	1	20	regulon	regulon	regulon				Oligo	Oligo
SP1	Tln2	1	1	20	regulon	regulon	regulon				Oligo	Oligo
PTF1A	Tnr	1	1	20	regulon	regulon	regulon				Oligo	Oligo
MYF5	Tnr	1	1	20	regulon	regulon	regulon				Oligo	Oligo
ELF5	Tnr	1	1	20	regulon	regulon	regulon				Oligo	Oligo
HNF6	Tnr	1	1	20	regulon	regulon	regulon				Oligo	Oligo
WT1	Tnr	1	1	20	regulon	regulon	regulon				Oligo	Oligo
SP2	Tnr	1	1	20	regulon	regulon	regulon				Oligo	Oligo
SP5	Tnr	1	1	20	regulon	regulon	regulon				Oligo	Oligo
MAZ	Tnr	1	1	20	regulon	regulon	regulon				Oligo	Oligo
IRF3	Tnr	1	1	20	regulon	regulon	regulon				Oligo	Oligo
TFE2	Tnr	1	1	20	regulon	regulon	regulon				Oligo	Oligo
FUBP1	Tnr	1	1	20	regulon	regulon	regulon				Oligo	Oligo
SALL1	Tnr	1	1	20	regulon	regulon	regulon				Oligo	Oligo
TBX5	Tnr	1	1	20	regulon	regulon	regulon				Oligo	Oligo
SP1	Tnr	1	1	20	regulon	regulon	regulon				Oligo	Oligo
BHA15	Tnr	1	1	20	regulon	regulon	regulon				Oligo	Oligo
MEF2A	Tnr	1	1	20	regulon	regulon	regulon				Oligo	Oligo
ASCL1	Tnr	1	1	20	regulon	regulon	regulon				Oligo	Oligo
OLIG2	Tnr	1	1	20	regulon	regulon	regulon				Oligo	Oligo
KLF5	Tnr	1	1	20	regulon	regulon	regulon				Oligo	Oligo
EGR1	Tnr	1	1	20	regulon	regulon	regulon				Oligo	Oligo
E2F7	Tnr	1	1	20	regulon	regulon	regulon				Oligo	Oligo
E2F3	Tnr	1	1	20	regulon	regulon	regulon				Oligo	Oligo
KLF15	Tnr	1	1	20	regulon	regulon	regulon				Oligo	Oligo
GATA1	Tnr	1	1	20	regulon	regulon	regulon				Oligo	Oligo
SMAD2	Tnr	1	1	20	regulon	regulon	regulon				Oligo	Oligo
ZBT17	Tnr	1	1	20	regulon	regulon	regulon				Oligo	Oligo
FLI1	Tnr	1	1	20	regulon	regulon	regulon				Oligo	Oligo
RREB1	Tnr	1	1	20	regulon	regulon	regulon				Oligo	Oligo
EGR2	Tnr	1	1	20	regulon	regulon	regulon				Oligo	Oligo
SPI1	Tnr	1	1	20	regulon	regulon	regulon				Oligo	Oligo
ETV5	Tnr	1	1	20	regulon	regulon	regulon				Oligo	Oligo
SP3	Tnr	1	1	20	regulon	regulon	regulon				Oligo	Oligo
ETS2	Tnr	1	1	20	regulon	regulon	regulon				Oligo	Oligo
SP3	Tox	1	1	20	regulon	regulon	regulon				Oligo	Oligo
SP3	Zfp462	1	1	20	regulon	regulon	regulon				Oligo	Oligo
WT1	Zfp462	1	1	20	regulon	regulon	regulon				Oligo	Oligo
SP2	Zfp462	1	1	20	regulon	regulon	regulon				Oligo	Oligo
ETS2	Zfp462	1	1	20	regulon	regulon	regulon				Oligo	Oligo
KLF5	Zfp462	1	1	20	regulon	regulon	regulon				Oligo	Oligo
SP1	Zfp462	1	1	20	regulon	regulon	regulon				Oligo	Oligo
MAZ	Zfp462	1	1	20	regulon	regulon	regulon				Oligo	Oligo
SP2	Zfp950	1	1	20	regulon	regulon	regulon				Oligo	Oligo
EGR1	Adam23	1	1	20	regulon	regulon	regulon				Oligo	Oligo
E2F3	Adam23	1	1	20	regulon	regulon	regulon				Oligo	Oligo
MAZ	Adam23	1	1	20	regulon	regulon	regulon				Oligo	Oligo
EGR2	Adgrb3	1	1	20	regulon	regulon	regulon				Oligo	Oligo
FOXJ3	Adgrb3	1	1	20	regulon	regulon	regulon				Oligo	Oligo
FOXF1	Adgrl3	1	1	20	regulon	regulon	regulon				Oligo	Oligo
FOXJ3	Adgrl3	1	1	20	regulon	regulon	regulon				Oligo	Oligo
KLF6	Adgrl3	1	1	20	regulon	regulon	regulon				Oligo	Oligo
SALL1	Adgrl3	1	1	20	regulon	regulon	regulon				Oligo	Oligo
EGR1	Adgrl3	1	1	20	regulon	regulon	regulon				Oligo	Oligo
SPI1	Adgrl3	1	1	20	regulon	regulon	regulon				Oligo	Oligo
KLF1	Adgrl3	1	1	20	regulon	regulon	regulon				Oligo	Oligo
TFE2	Adgrl3	1	1	20	regulon	regulon	regulon				Oligo	Oligo
KLF5	Adgrl3	1	1	20	regulon	regulon	regulon				Oligo	Oligo
RFX1	Adgrl3	1	1	20	regulon	regulon	regulon				Oligo	Oligo
FLI1	Adgrl3	1	1	20	regulon	regulon	regulon				Oligo	Oligo
ZBT17	Adgrl3	1	1	20	regulon	regulon	regulon				Oligo	Oligo
IRF3	Adgrl3	1	1	20	regulon	regulon	regulon				Oligo	Oligo
BHA15	Adgrl3	1	1	20	regulon	regulon	regulon				Oligo	Oligo
MAZ	Adgrl3	1	1	20	regulon	regulon	regulon				Oligo	Oligo
WT1	Adgrl3	1	1	20	regulon	regulon	regulon				Oligo	Oligo
OLIG2	Adgrl3	1	1	20	regulon	regulon	regulon				Oligo	Oligo
SP3	Adgrl3	1	1	20	regulon	regulon	regulon				Oligo	Oligo
E2F3	Adgrl3	1	1	20	regulon	regulon	regulon				Oligo	Oligo
SP1	Adgrl3	1	1	20	regulon	regulon	regulon				Oligo	Oligo
ASCL1	Adgrl3	1	1	20	regulon	regulon	regulon				Oligo	Oligo
ZN281	Adgrl3	1	1	20	regulon	regulon	regulon				Oligo	Oligo
SMAD1	Adgrl3	1	1	20	regulon	regulon	regulon				Oligo	Oligo
ZFX	Adgrl3	1	1	20	regulon	regulon	regulon				Oligo	Oligo
SMAD3	Adgrl3	1	1	20	regulon	regulon	regulon				Oligo	Oligo
GATA1	Adgrl3	1	1	20	regulon	regulon	regulon				Oligo	Oligo
ELF5	Adgrl3	1	1	20	regulon	regulon	regulon				Oligo	Oligo
EGR2	Adgrl3	1	1	20	regulon	regulon	regulon				Oligo	Oligo
SP2	Adgrl3	1	1	20	regulon	regulon	regulon				Oligo	Oligo
PTF1A	Adgrl3	1	1	20	regulon	regulon	regulon				Oligo	Oligo
ETS2	Adgrl3	1	1	20	regulon	regulon	regulon				Oligo	Oligo
MAZ	Akt3	1	1	20	regulon	regulon	regulon				Oligo	Oligo
ETS2	Akt3	1	1	20	regulon	regulon	regulon				Oligo	Oligo
SRY	Anln	1	1	20	regulon	regulon	regulon				Oligo	Oligo
SP3	Anln	1	1	20	regulon	regulon	regulon				Oligo	Oligo
ELF5	Anln	1	1	20	regulon	regulon	regulon				Oligo	Oligo
EGR2	Anln	1	1	20	regulon	regulon	regulon				Oligo	Oligo
WT1	Anln	1	1	20	regulon	regulon	regulon				Oligo	Oligo
MAZ	Anln	1	1	20	regulon	regulon	regulon				Oligo	Oligo
SP1	Anln	1	1	20	regulon	regulon	regulon				Oligo	Oligo
ETS2	Anln	1	1	20	regulon	regulon	regulon				Oligo	Oligo
FOXJ2	Anln	1	1	20	regulon	regulon	regulon				Oligo	Oligo
KLF15	Anln	1	1	20	regulon	regulon	regulon				Oligo	Oligo
SP2	Anln	1	1	20	regulon	regulon	regulon				Oligo	Oligo
SMAD4	Anln	1	1	20	regulon	regulon	regulon				Oligo	Oligo
EGR2	Arhgap39	1	1	20	regulon	regulon	regulon				Oligo	Oligo
SMAD4	Arhgap39	1	1	20	regulon	regulon	regulon				Oligo	Oligo
SRY	Arhgap39	1	1	20	regulon	regulon	regulon				Oligo	Oligo
MAZ	Arhgap39	1	1	20	regulon	regulon	regulon				Oligo	Oligo
MAZ	Arhgef12	1	1	20	regulon	regulon	regulon				Oligo	Oligo
KLF1	Arid4b	1	1	20	regulon	regulon	regulon				Oligo	Oligo
FOXJ3	Arid4b	1	1	20	regulon	regulon	regulon				Oligo	Oligo
MAZ	Arsb	1	1	20	regulon	regulon	regulon				Oligo	Oligo
E2F3	Arsb	1	1	20	regulon	regulon	regulon				Oligo	Oligo
SALL1	Arsb	1	1	20	regulon	regulon	regulon				Oligo	Oligo
FLI1	Asap1	1	1	20	regulon	regulon	regulon				Oligo	Oligo
E2F3	Aspa	1	1	20	regulon	regulon	regulon				Oligo	Oligo
FOXJ3	Aspa	1	1	20	regulon	regulon	regulon				Oligo	Oligo
ELF5	Aspa	1	1	20	regulon	regulon	regulon				Oligo	Oligo
MAZ	Aspa	1	1	20	regulon	regulon	regulon				Oligo	Oligo
WT1	Aspa	1	1	20	regulon	regulon	regulon				Oligo	Oligo
SP2	Aspa	1	1	20	regulon	regulon	regulon				Oligo	Oligo
ETS2	Aspa	1	1	20	regulon	regulon	regulon				Oligo	Oligo
FLI1	Aspa	1	1	20	regulon	regulon	regulon				Oligo	Oligo
SP1	Aspa	1	1	20	regulon	regulon	regulon				Oligo	Oligo
SP3	Aspa	1	1	20	regulon	regulon	regulon				Oligo	Oligo
WT1	Atp6v0a1	1	1	20	regulon	regulon	regulon				Oligo	Oligo
KLF5	Atp6v0a1	1	1	20	regulon	regulon	regulon				Oligo	Oligo
EGR1	Atp6v0a1	1	1	20	regulon	regulon	regulon				Oligo	Oligo
FUBP1	Atp9a	1	1	20	regulon	regulon	regulon				Oligo	Oligo
MAZ	Atp9a	1	1	20	regulon	regulon	regulon				Oligo	Oligo
ELF5	Auts2	1	1	20	regulon	regulon	regulon				Oligo	Oligo
ELF5	Bcl2l1	1	1	20	regulon	regulon	regulon				Oligo	Oligo
EGR2	Bcl2l1	1	1	20	regulon	regulon	regulon				Oligo	Oligo
SP3	Bcl2l1	1	1	20	regulon	regulon	regulon				Oligo	Oligo
SRY	Bcl2l1	1	1	20	regulon	regulon	regulon				Oligo	Oligo
MAZ	Bcl2l1	1	1	20	regulon	regulon	regulon				Oligo	Oligo
ETS2	Bcl2l1	1	1	20	regulon	regulon	regulon				Oligo	Oligo
SMAD4	Bcl2l1	1	1	20	regulon	regulon	regulon				Oligo	Oligo
FOXJ3	Bcl2l1	1	1	20	regulon	regulon	regulon				Oligo	Oligo
SP3	Cacna1c	1	1	20	regulon	regulon	regulon				Oligo	Oligo
MAZ	Cacna2d1	1	1	20	regulon	regulon	regulon				Oligo	Oligo
SP2	Cacna2d1	1	1	20	regulon	regulon	regulon				Oligo	Oligo
SP3	Cadm1	1	1	20	regulon	regulon	regulon				Oligo	Oligo
FOXJ3	Cadm1	1	1	20	regulon	regulon	regulon				Oligo	Oligo
SMAD2	Ccnl2	1	1	20	regulon	regulon	regulon				Oligo	Oligo
KLF5	Ccser1	1	1	20	regulon	regulon	regulon				Oligo	Oligo
ELF5	Ccser1	1	1	20	regulon	regulon	regulon				Oligo	Oligo
MAZ	Ccser1	1	1	20	regulon	regulon	regulon				Oligo	Oligo
SP1	Ccser1	1	1	20	regulon	regulon	regulon				Oligo	Oligo
SP3	Ccser1	1	1	20	regulon	regulon	regulon				Oligo	Oligo
KLF15	Ccser1	1	1	20	regulon	regulon	regulon				Oligo	Oligo
SALL1	Ccser1	1	1	20	regulon	regulon	regulon				Oligo	Oligo
E2F3	Ccser1	1	1	20	regulon	regulon	regulon				Oligo	Oligo
WT1	Ccser1	1	1	20	regulon	regulon	regulon				Oligo	Oligo
SP5	Ccser1	1	1	20	regulon	regulon	regulon				Oligo	Oligo
SALL4	Ccser1	1	1	20	regulon	regulon	regulon				Oligo	Oligo
EGR2	Ccser1	1	1	20	regulon	regulon	regulon				Oligo	Oligo
SP2	Ccser1	1	1	20	regulon	regulon	regulon				Oligo	Oligo
RFX1	Ccser1	1	1	20	regulon	regulon	regulon				Oligo	Oligo
ETS2	Ccser1	1	1	20	regulon	regulon	regulon				Oligo	Oligo
SP1	Cdc42bpa	1	1	20	regulon	regulon	regulon				Oligo	Oligo
MAZ	Cdh11	1	1	20	regulon	regulon	regulon				Oligo	Oligo
KLF5	Cdh2	1	1	20	regulon	regulon	regulon				Oligo	Oligo
FOXJ3	Cntn3	1	1	20	regulon	regulon	regulon				Oligo	Oligo
ELF5	Cntn3	1	1	20	regulon	regulon	regulon				Oligo	Oligo
MAZ	Cntn3	1	1	20	regulon	regulon	regulon				Oligo	Oligo
SALL1	Csmd1	1	1	20	regulon	regulon	regulon				Oligo	Oligo
RFX1	Csmd1	1	1	20	regulon	regulon	regulon				Oligo	Oligo
KLF1	Csmd1	1	1	20	regulon	regulon	regulon				Oligo	Oligo
KLF3	Csmd1	1	1	20	regulon	regulon	regulon				Oligo	Oligo
TFE2	Csmd1	1	1	20	regulon	regulon	regulon				Oligo	Oligo
MAZ	Csmd1	1	1	20	regulon	regulon	regulon				Oligo	Oligo
SMAD1	Csmd1	1	1	20	regulon	regulon	regulon				Oligo	Oligo
ETS2	Csmd1	1	1	20	regulon	regulon	regulon				Oligo	Oligo
IRF3	Csmd1	1	1	20	regulon	regulon	regulon				Oligo	Oligo
KLF6	Csmd1	1	1	20	regulon	regulon	regulon				Oligo	Oligo
EGR4	Csmd1	1	1	20	regulon	regulon	regulon				Oligo	Oligo
E2F3	Csmd1	1	1	20	regulon	regulon	regulon				Oligo	Oligo
ZFX	Csmd1	1	1	20	regulon	regulon	regulon				Oligo	Oligo
STAT1	Csmd1	1	1	20	regulon	regulon	regulon				Oligo	Oligo
E2F6	Csmd1	1	1	20	regulon	regulon	regulon				Oligo	Oligo
OLIG2	Csmd1	1	1	20	regulon	regulon	regulon				Oligo	Oligo
MYF5	Csmd1	1	1	20	regulon	regulon	regulon				Oligo	Oligo
ZFHX3	Csmd1	1	1	20	regulon	regulon	regulon				Oligo	Oligo
WT1	Csmd1	1	1	20	regulon	regulon	regulon				Oligo	Oligo
SP2	Csmd1	1	1	20	regulon	regulon	regulon				Oligo	Oligo
EGR1	Csmd1	1	1	20	regulon	regulon	regulon				Oligo	Oligo
ELF5	Csmd1	1	1	20	regulon	regulon	regulon				Oligo	Oligo
EGR2	Csmd1	1	1	20	regulon	regulon	regulon				Oligo	Oligo
SMAD2	Csmd1	1	1	20	regulon	regulon	regulon				Oligo	Oligo
PRD16	Csmd1	1	1	20	regulon	regulon	regulon				Oligo	Oligo
GATA1	Csmd1	1	1	20	regulon	regulon	regulon				Oligo	Oligo
FUBP1	Csmd1	1	1	20	regulon	regulon	regulon				Oligo	Oligo
BHA15	Csmd1	1	1	20	regulon	regulon	regulon				Oligo	Oligo
ZN281	Csmd1	1	1	20	regulon	regulon	regulon				Oligo	Oligo
HAND1	Csmd1	1	1	20	regulon	regulon	regulon				Oligo	Oligo
TBX5	Csmd1	1	1	20	regulon	regulon	regulon				Oligo	Oligo
KLF5	Csmd1	1	1	20	regulon	regulon	regulon				Oligo	Oligo
MEF2A	Csmd1	1	1	20	regulon	regulon	regulon				Oligo	Oligo
KLF15	Csmd1	1	1	20	regulon	regulon	regulon				Oligo	Oligo
RREB1	Csmd1	1	1	20	regulon	regulon	regulon				Oligo	Oligo
SP3	Csmd1	1	1	20	regulon	regulon	regulon				Oligo	Oligo
FLI1	Csmd1	1	1	20	regulon	regulon	regulon				Oligo	Oligo
ZBT17	Csmd1	1	1	20	regulon	regulon	regulon				Oligo	Oligo
E2F7	Csmd1	1	1	20	regulon	regulon	regulon				Oligo	Oligo
SALL4	Csmd1	1	1	20	regulon	regulon	regulon				Oligo	Oligo
SP5	Csmd1	1	1	20	regulon	regulon	regulon				Oligo	Oligo
ETV5	Csmd1	1	1	20	regulon	regulon	regulon				Oligo	Oligo
PTF1A	Csmd1	1	1	20	regulon	regulon	regulon				Oligo	Oligo
SPI1	Csmd1	1	1	20	regulon	regulon	regulon				Oligo	Oligo
SP1	Csmd1	1	1	20	regulon	regulon	regulon				Oligo	Oligo
FOXJ3	Csmd1	1	1	20	regulon	regulon	regulon				Oligo	Oligo
ASCL1	Csmd1	1	1	20	regulon	regulon	regulon				Oligo	Oligo
E2F3	Ctdspl	1	1	20	regulon	regulon	regulon				Oligo	Oligo
EGR1	Ctnnd2	1	1	20	regulon	regulon	regulon				Oligo	Oligo
WT1	Ctnnd2	1	1	20	regulon	regulon	regulon				Oligo	Oligo
SP2	Ctnnd2	1	1	20	regulon	regulon	regulon				Oligo	Oligo
SALL1	Ctnnd2	1	1	20	regulon	regulon	regulon				Oligo	Oligo
SMAD2	Ctnnd2	1	1	20	regulon	regulon	regulon				Oligo	Oligo
OLIG2	Ctnnd2	1	1	20	regulon	regulon	regulon				Oligo	Oligo
FLI1	Ctnnd2	1	1	20	regulon	regulon	regulon				Oligo	Oligo
KLF1	Ctnnd2	1	1	20	regulon	regulon	regulon				Oligo	Oligo
ZN281	Ctnnd2	1	1	20	regulon	regulon	regulon				Oligo	Oligo
ETS2	Ctnnd2	1	1	20	regulon	regulon	regulon				Oligo	Oligo
SP3	Ctnnd2	1	1	20	regulon	regulon	regulon				Oligo	Oligo
PTF1A	Ctnnd2	1	1	20	regulon	regulon	regulon				Oligo	Oligo
RREB1	Ctnnd2	1	1	20	regulon	regulon	regulon				Oligo	Oligo
E2F3	Ctnnd2	1	1	20	regulon	regulon	regulon				Oligo	Oligo
ZBT17	Ctnnd2	1	1	20	regulon	regulon	regulon				Oligo	Oligo
MAZ	Ctnnd2	1	1	20	regulon	regulon	regulon				Oligo	Oligo
EGR2	Ctnnd2	1	1	20	regulon	regulon	regulon				Oligo	Oligo
ASCL1	Ctnnd2	1	1	20	regulon	regulon	regulon				Oligo	Oligo
ZFX	Ctnnd2	1	1	20	regulon	regulon	regulon				Oligo	Oligo
ELF5	Ctnnd2	1	1	20	regulon	regulon	regulon				Oligo	Oligo
MYF5	Ctnnd2	1	1	20	regulon	regulon	regulon				Oligo	Oligo
SPI1	Ctnnd2	1	1	20	regulon	regulon	regulon				Oligo	Oligo
SP1	Ctnnd2	1	1	20	regulon	regulon	regulon				Oligo	Oligo
RFX1	Ctnnd2	1	1	20	regulon	regulon	regulon				Oligo	Oligo
KLF5	Ctnnd2	1	1	20	regulon	regulon	regulon				Oligo	Oligo
BHA15	Ctnnd2	1	1	20	regulon	regulon	regulon				Oligo	Oligo
ETS2	Daam2	1	1	20	regulon	regulon	regulon				Oligo	Oligo
MAZ	Daam2	1	1	20	regulon	regulon	regulon				Oligo	Oligo
SP1	Daam2	1	1	20	regulon	regulon	regulon				Oligo	Oligo
WT1	Daam2	1	1	20	regulon	regulon	regulon				Oligo	Oligo
KLF5	Daam2	1	1	20	regulon	regulon	regulon				Oligo	Oligo
ELF5	Daam2	1	1	20	regulon	regulon	regulon				Oligo	Oligo
KLF15	Daam2	1	1	20	regulon	regulon	regulon				Oligo	Oligo
SP3	Dennd1a	1	1	20	regulon	regulon	regulon				Oligo	Oligo
MAZ	Dennd1a	1	1	20	regulon	regulon	regulon				Oligo	Oligo
EGR1	Dennd4a	1	1	20	regulon	regulon	regulon				Oligo	Oligo
KLF1	Dip2c	1	1	20	regulon	regulon	regulon				Oligo	Oligo
SP1	Dip2c	1	1	20	regulon	regulon	regulon				Oligo	Oligo
FOXJ3	Dip2c	1	1	20	regulon	regulon	regulon				Oligo	Oligo
SP1	Dmd	1	1	20	regulon	regulon	regulon				Oligo	Oligo
SP2	Dmd	1	1	20	regulon	regulon	regulon				Oligo	Oligo
FOXF1	Dmd	1	1	20	regulon	regulon	regulon				Oligo	Oligo
IRF3	Dmd	1	1	20	regulon	regulon	regulon				Oligo	Oligo
MAZ	Dmd	1	1	20	regulon	regulon	regulon				Oligo	Oligo
WT1	Dmd	1	1	20	regulon	regulon	regulon				Oligo	Oligo
FOXJ3	Dmd	1	1	20	regulon	regulon	regulon				Oligo	Oligo
HMGA1	Dmd	1	1	20	regulon	regulon	regulon				Oligo	Oligo
STAT1	Dmd	1	1	20	regulon	regulon	regulon				Oligo	Oligo
BHA15	Dmd	1	1	20	regulon	regulon	regulon				Oligo	Oligo
PTF1A	Dmd	1	1	20	regulon	regulon	regulon				Oligo	Oligo
OLIG2	Dmd	1	1	20	regulon	regulon	regulon				Oligo	Oligo
MYF5	Dmd	1	1	20	regulon	regulon	regulon				Oligo	Oligo
KLF6	Dmd	1	1	20	regulon	regulon	regulon				Oligo	Oligo
E2F3	Dmd	1	1	20	regulon	regulon	regulon				Oligo	Oligo
ETS2	Dmd	1	1	20	regulon	regulon	regulon				Oligo	Oligo
ELF5	Dmd	1	1	20	regulon	regulon	regulon				Oligo	Oligo
SPI1	Dmd	1	1	20	regulon	regulon	regulon				Oligo	Oligo
FLI1	Dmd	1	1	20	regulon	regulon	regulon				Oligo	Oligo
WT1	Dock4	1	1	20	regulon	regulon	regulon				Oligo	Oligo
MAZ	Dock4	1	1	20	regulon	regulon	regulon				Oligo	Oligo
KLF1	Dock4	1	1	20	regulon	regulon	regulon				Oligo	Oligo
MAZ	Eml1	1	1	20	regulon	regulon	regulon				Oligo	Oligo
WT1	Eml1	1	1	20	regulon	regulon	regulon				Oligo	Oligo
ETS2	Eml1	1	1	20	regulon	regulon	regulon				Oligo	Oligo
WT1	Fchsd2	1	1	20	regulon	regulon	regulon				Oligo	Oligo
FUBP1	Fchsd2	1	1	20	regulon	regulon	regulon				Oligo	Oligo
E2F6	Fchsd2	1	1	20	regulon	regulon	regulon				Oligo	Oligo
MEF2A	Fchsd2	1	1	20	regulon	regulon	regulon				Oligo	Oligo
ELF5	Fchsd2	1	1	20	regulon	regulon	regulon				Oligo	Oligo
EGR2	Fchsd2	1	1	20	regulon	regulon	regulon				Oligo	Oligo
SP1	Fchsd2	1	1	20	regulon	regulon	regulon				Oligo	Oligo
SP5	Fchsd2	1	1	20	regulon	regulon	regulon				Oligo	Oligo
ZBT17	Fchsd2	1	1	20	regulon	regulon	regulon				Oligo	Oligo
MAZ	Fchsd2	1	1	20	regulon	regulon	regulon				Oligo	Oligo
SMAD2	Fchsd2	1	1	20	regulon	regulon	regulon				Oligo	Oligo
FLI1	Fchsd2	1	1	20	regulon	regulon	regulon				Oligo	Oligo
ETS2	Fchsd2	1	1	20	regulon	regulon	regulon				Oligo	Oligo
FOXJ3	Fchsd2	1	1	20	regulon	regulon	regulon				Oligo	Oligo
SP2	Fchsd2	1	1	20	regulon	regulon	regulon				Oligo	Oligo
SP3	Fchsd2	1	1	20	regulon	regulon	regulon				Oligo	Oligo
KLF15	Fchsd2	1	1	20	regulon	regulon	regulon				Oligo	Oligo
PTF1A	Fchsd2	1	1	20	regulon	regulon	regulon				Oligo	Oligo
EGR1	Fchsd2	1	1	20	regulon	regulon	regulon				Oligo	Oligo
E2F3	Fchsd2	1	1	20	regulon	regulon	regulon				Oligo	Oligo
BHA15	Fgf14	1	1	20	regulon	regulon	regulon				Oligo	Oligo
ASCL1	Fgf14	1	1	20	regulon	regulon	regulon				Oligo	Oligo
SALL1	Fgf14	1	1	20	regulon	regulon	regulon				Oligo	Oligo
FUBP1	Fgf14	1	1	20	regulon	regulon	regulon				Oligo	Oligo
KLF5	Fgf14	1	1	20	regulon	regulon	regulon				Oligo	Oligo
E2F3	Fgf14	1	1	20	regulon	regulon	regulon				Oligo	Oligo
MAZ	Fgf14	1	1	20	regulon	regulon	regulon				Oligo	Oligo
TFE2	Fgf14	1	1	20	regulon	regulon	regulon				Oligo	Oligo
HNF6	Fgf14	1	1	20	regulon	regulon	regulon				Oligo	Oligo
FOXF1	Fgf14	1	1	20	regulon	regulon	regulon				Oligo	Oligo
ZBT17	Fgf14	1	1	20	regulon	regulon	regulon				Oligo	Oligo
KLF6	Fgf14	1	1	20	regulon	regulon	regulon				Oligo	Oligo
SP1	Fgf14	1	1	20	regulon	regulon	regulon				Oligo	Oligo
EGR1	Fgf14	1	1	20	regulon	regulon	regulon				Oligo	Oligo
SP2	Fgf14	1	1	20	regulon	regulon	regulon				Oligo	Oligo
SMAD3	Fgf14	1	1	20	regulon	regulon	regulon				Oligo	Oligo
SALL4	Fgf14	1	1	20	regulon	regulon	regulon				Oligo	Oligo
ETS2	Fgf14	1	1	20	regulon	regulon	regulon				Oligo	Oligo
SPI1	Fgf14	1	1	20	regulon	regulon	regulon				Oligo	Oligo
ZN281	Fgf14	1	1	20	regulon	regulon	regulon				Oligo	Oligo
KLF15	Fgf14	1	1	20	regulon	regulon	regulon				Oligo	Oligo
MEF2A	Fgf14	1	1	20	regulon	regulon	regulon				Oligo	Oligo
KLF1	Fgf14	1	1	20	regulon	regulon	regulon				Oligo	Oligo
OLIG2	Fgf14	1	1	20	regulon	regulon	regulon				Oligo	Oligo
ELF5	Fgf14	1	1	20	regulon	regulon	regulon				Oligo	Oligo
SP5	Fgf14	1	1	20	regulon	regulon	regulon				Oligo	Oligo
WT1	Fgf14	1	1	20	regulon	regulon	regulon				Oligo	Oligo
FLI1	Fgf14	1	1	20	regulon	regulon	regulon				Oligo	Oligo
SP3	Fgf14	1	1	20	regulon	regulon	regulon				Oligo	Oligo
EGR2	Fgf14	1	1	20	regulon	regulon	regulon				Oligo	Oligo
PRD16	Fgf14	1	1	20	regulon	regulon	regulon				Oligo	Oligo
FOXJ3	Fgf14	1	1	20	regulon	regulon	regulon				Oligo	Oligo
FUBP1	Frmd4a	1	1	20	regulon	regulon	regulon				Oligo	Oligo
MAZ	Frmd4a	1	1	20	regulon	regulon	regulon				Oligo	Oligo
FLI1	Frmd4a	1	1	20	regulon	regulon	regulon				Oligo	Oligo
SP1	Gls	1	1	20	regulon	regulon	regulon				Oligo	Oligo
MYF5	Gls	1	1	20	regulon	regulon	regulon				Oligo	Oligo
MAZ	Gm20754	1	1	20	regulon	regulon	regulon				Oligo	Oligo
ELF5	Gpm6b	1	1	20	regulon	regulon	regulon				Oligo	Oligo
SPI1	Gramd1b	1	1	20	regulon	regulon	regulon				Oligo	Oligo
E2F3	Gria2	1	1	20	regulon	regulon	regulon				Oligo	Oligo
SP1	Gria2	1	1	20	regulon	regulon	regulon				Oligo	Oligo
RFX1	Gria2	1	1	20	regulon	regulon	regulon				Oligo	Oligo
WT1	Gria2	1	1	20	regulon	regulon	regulon				Oligo	Oligo
SALL1	Gria2	1	1	20	regulon	regulon	regulon				Oligo	Oligo
EGR2	Gria2	1	1	20	regulon	regulon	regulon				Oligo	Oligo
EGR1	Gria2	1	1	20	regulon	regulon	regulon				Oligo	Oligo
ZFX	Gria2	1	1	20	regulon	regulon	regulon				Oligo	Oligo
ASCL1	Gria2	1	1	20	regulon	regulon	regulon				Oligo	Oligo
SP3	Gria2	1	1	20	regulon	regulon	regulon				Oligo	Oligo
ELF5	Gria2	1	1	20	regulon	regulon	regulon				Oligo	Oligo
MAZ	Gria2	1	1	20	regulon	regulon	regulon				Oligo	Oligo
KLF1	Gria2	1	1	20	regulon	regulon	regulon				Oligo	Oligo
SP2	Gria2	1	1	20	regulon	regulon	regulon				Oligo	Oligo
MAZ	Gria4	1	1	20	regulon	regulon	regulon				Oligo	Oligo
MAZ	Grm5	1	1	20	regulon	regulon	regulon				Oligo	Oligo
WT1	Grm5	1	1	20	regulon	regulon	regulon				Oligo	Oligo
SP1	Grm5	1	1	20	regulon	regulon	regulon				Oligo	Oligo
PTF1A	Grm5	1	1	20	regulon	regulon	regulon				Oligo	Oligo
MAZ	Grm7	1	1	20	regulon	regulon	regulon				Oligo	Oligo
KLF15	Itpk1	1	1	20	regulon	regulon	regulon				Oligo	Oligo
SRY	Itpk1	1	1	20	regulon	regulon	regulon				Oligo	Oligo
SP1	Itpk1	1	1	20	regulon	regulon	regulon				Oligo	Oligo
FOXJ3	Itpk1	1	1	20	regulon	regulon	regulon				Oligo	Oligo
SMAD4	Itpk1	1	1	20	regulon	regulon	regulon				Oligo	Oligo
SP3	Itpk1	1	1	20	regulon	regulon	regulon				Oligo	Oligo
ETS2	Itpk1	1	1	20	regulon	regulon	regulon				Oligo	Oligo
EGR2	Itpk1	1	1	20	regulon	regulon	regulon				Oligo	Oligo
E2F3	Kcnq1	1	1	20	regulon	regulon	regulon				Oligo	Oligo
MAZ	Kcnq1	1	1	20	regulon	regulon	regulon				Oligo	Oligo
MAZ	Kdm3b	1	1	20	regulon	regulon	regulon				Oligo	Oligo
SP2	Kdm3b	1	1	20	regulon	regulon	regulon				Oligo	Oligo
FOXJ3	Kdm3b	1	1	20	regulon	regulon	regulon				Oligo	Oligo
RFX1	Kirrel3	1	1	20	regulon	regulon	regulon				Oligo	Oligo
MAZ	Kirrel3	1	1	20	regulon	regulon	regulon				Oligo	Oligo
KLF15	Klf13	1	1	20	regulon	regulon	regulon				Oligo	Oligo
EGR2	Ldlrad4	1	1	20	regulon	regulon	regulon				Oligo	Oligo
SALL1	Lrch3	1	1	20	regulon	regulon	regulon				Oligo	Oligo
MAZ	Lrrc4	1	1	20	regulon	regulon	regulon				Oligo	Oligo
SP2	Lrrc4	1	1	20	regulon	regulon	regulon				Oligo	Oligo
PTF1A	Map2	1	1	20	regulon	regulon	regulon				Oligo	Oligo
SP3	Map2	1	1	20	regulon	regulon	regulon				Oligo	Oligo
KLF5	Map2	1	1	20	regulon	regulon	regulon				Oligo	Oligo
MAZ	Map2	1	1	20	regulon	regulon	regulon				Oligo	Oligo
SP1	Map2	1	1	20	regulon	regulon	regulon				Oligo	Oligo
ETS2	Map2	1	1	20	regulon	regulon	regulon				Oligo	Oligo
E2F6	Map2	1	1	20	regulon	regulon	regulon				Oligo	Oligo
ELF5	Map2	1	1	20	regulon	regulon	regulon				Oligo	Oligo
WT1	Map2	1	1	20	regulon	regulon	regulon				Oligo	Oligo
E2F3	Map2	1	1	20	regulon	regulon	regulon				Oligo	Oligo
EGR1	Map2	1	1	20	regulon	regulon	regulon				Oligo	Oligo
E2F3	Map7d2	1	1	20	regulon	regulon	regulon				Oligo	Oligo
EGR1	Map7d2	1	1	20	regulon	regulon	regulon				Oligo	Oligo
MAZ	Map7d2	1	1	20	regulon	regulon	regulon				Oligo	Oligo
WT1	Map7d2	1	1	20	regulon	regulon	regulon				Oligo	Oligo
SALL1	Mast4	1	1	20	regulon	regulon	regulon				Oligo	Oligo
WT1	Mast4	1	1	20	regulon	regulon	regulon				Oligo	Oligo
ELF5	Mast4	1	1	20	regulon	regulon	regulon				Oligo	Oligo
MAZ	Mast4	1	1	20	regulon	regulon	regulon				Oligo	Oligo
SP2	Mast4	1	1	20	regulon	regulon	regulon				Oligo	Oligo
ETS2	Mast4	1	1	20	regulon	regulon	regulon				Oligo	Oligo
SP1	Mast4	1	1	20	regulon	regulon	regulon				Oligo	Oligo
E2F3	Mboat2	1	1	20	regulon	regulon	regulon				Oligo	Oligo
ETS2	Mob3b	1	1	20	regulon	regulon	regulon				Oligo	Oligo
SP1	Mob3b	1	1	20	regulon	regulon	regulon				Oligo	Oligo
MAZ	Mob3b	1	1	20	regulon	regulon	regulon				Oligo	Oligo
FOXJ3	Myo18a	1	1	20	regulon	regulon	regulon				Oligo	Oligo
MEF2A	Nav3	1	1	20	regulon	regulon	regulon				Oligo	Oligo
RREB1	Nav3	1	1	20	regulon	regulon	regulon				Oligo	Oligo
SALL4	Nav3	1	1	20	regulon	regulon	regulon				Oligo	Oligo
EGR2	Nav3	1	1	20	regulon	regulon	regulon				Oligo	Oligo
KLF15	Nav3	1	1	20	regulon	regulon	regulon				Oligo	Oligo
MAZ	Nav3	1	1	20	regulon	regulon	regulon				Oligo	Oligo
FOXF1	Nav3	1	1	20	regulon	regulon	regulon				Oligo	Oligo
STAT1	Nav3	1	1	20	regulon	regulon	regulon				Oligo	Oligo
ZN281	Nav3	1	1	20	regulon	regulon	regulon				Oligo	Oligo
SP5	Nav3	1	1	20	regulon	regulon	regulon				Oligo	Oligo
IRF3	Nav3	1	1	20	regulon	regulon	regulon				Oligo	Oligo
RFX1	Nav3	1	1	20	regulon	regulon	regulon				Oligo	Oligo
SMAD2	Nav3	1	1	20	regulon	regulon	regulon				Oligo	Oligo
ETS2	Nav3	1	1	20	regulon	regulon	regulon				Oligo	Oligo
BHA15	Nav3	1	1	20	regulon	regulon	regulon				Oligo	Oligo
SMAD3	Nav3	1	1	20	regulon	regulon	regulon				Oligo	Oligo
WT1	Nav3	1	1	20	regulon	regulon	regulon				Oligo	Oligo
E2F3	Nav3	1	1	20	regulon	regulon	regulon				Oligo	Oligo
SMAD1	Nav3	1	1	20	regulon	regulon	regulon				Oligo	Oligo
ASCL1	Nav3	1	1	20	regulon	regulon	regulon				Oligo	Oligo
FLI1	Nav3	1	1	20	regulon	regulon	regulon				Oligo	Oligo
KLF6	Nav3	1	1	20	regulon	regulon	regulon				Oligo	Oligo
HAND1	Nav3	1	1	20	regulon	regulon	regulon				Oligo	Oligo
FOXJ3	Nav3	1	1	20	regulon	regulon	regulon				Oligo	Oligo
SP3	Nav3	1	1	20	regulon	regulon	regulon				Oligo	Oligo
FUBP1	Nav3	1	1	20	regulon	regulon	regulon				Oligo	Oligo
E2F7	Nav3	1	1	20	regulon	regulon	regulon				Oligo	Oligo
ZBT17	Nav3	1	1	20	regulon	regulon	regulon				Oligo	Oligo
ETV5	Nav3	1	1	20	regulon	regulon	regulon				Oligo	Oligo
SP2	Nav3	1	1	20	regulon	regulon	regulon				Oligo	Oligo
PTF1A	Nav3	1	1	20	regulon	regulon	regulon				Oligo	Oligo
SPI1	Nav3	1	1	20	regulon	regulon	regulon				Oligo	Oligo
SALL1	Nav3	1	1	20	regulon	regulon	regulon				Oligo	Oligo
SP1	Nav3	1	1	20	regulon	regulon	regulon				Oligo	Oligo
ELF5	Nav3	1	1	20	regulon	regulon	regulon				Oligo	Oligo
PRD16	Nav3	1	1	20	regulon	regulon	regulon				Oligo	Oligo
EGR1	Nav3	1	1	20	regulon	regulon	regulon				Oligo	Oligo
KLF5	Nav3	1	1	20	regulon	regulon	regulon				Oligo	Oligo
OLIG2	Nav3	1	1	20	regulon	regulon	regulon				Oligo	Oligo
TFE2	Nav3	1	1	20	regulon	regulon	regulon				Oligo	Oligo
GATA1	Nav3	1	1	20	regulon	regulon	regulon				Oligo	Oligo
ZN281	Nckap5	1	1	20	regulon	regulon	regulon				Oligo	Oligo
SP5	Nckap5	1	1	20	regulon	regulon	regulon				Oligo	Oligo
KLF15	Nckap5	1	1	20	regulon	regulon	regulon				Oligo	Oligo
KLF3	Nckap5	1	1	20	regulon	regulon	regulon				Oligo	Oligo
SP2	Nckap5	1	1	20	regulon	regulon	regulon				Oligo	Oligo
SALL4	Nckap5	1	1	20	regulon	regulon	regulon				Oligo	Oligo
WT1	Nckap5	1	1	20	regulon	regulon	regulon				Oligo	Oligo
SPI1	Nckap5	1	1	20	regulon	regulon	regulon				Oligo	Oligo
E2F3	Nckap5	1	1	20	regulon	regulon	regulon				Oligo	Oligo
ZFHX3	Nckap5	1	1	20	regulon	regulon	regulon				Oligo	Oligo
SALL1	Nckap5	1	1	20	regulon	regulon	regulon				Oligo	Oligo
SMAD2	Nckap5	1	1	20	regulon	regulon	regulon				Oligo	Oligo
HNF6	Nckap5	1	1	20	regulon	regulon	regulon				Oligo	Oligo
GATA1	Nckap5	1	1	20	regulon	regulon	regulon				Oligo	Oligo
ETS2	Nckap5	1	1	20	regulon	regulon	regulon				Oligo	Oligo
ZBT17	Nckap5	1	1	20	regulon	regulon	regulon				Oligo	Oligo
FUBP1	Nckap5	1	1	20	regulon	regulon	regulon				Oligo	Oligo
ELF5	Nckap5	1	1	20	regulon	regulon	regulon				Oligo	Oligo
FOXJ3	Nckap5	1	1	20	regulon	regulon	regulon				Oligo	Oligo
IRF3	Nckap5	1	1	20	regulon	regulon	regulon				Oligo	Oligo
MAZ	Nckap5	1	1	20	regulon	regulon	regulon				Oligo	Oligo
KLF5	Nckap5	1	1	20	regulon	regulon	regulon				Oligo	Oligo
PO2F2	Nckap5	1	1	20	regulon	regulon	regulon				Oligo	Oligo
E2F6	Nckap5	1	1	20	regulon	regulon	regulon				Oligo	Oligo
EGR2	Nckap5	1	1	20	regulon	regulon	regulon				Oligo	Oligo
FLI1	Nckap5	1	1	20	regulon	regulon	regulon				Oligo	Oligo
EGR1	Nckap5	1	1	20	regulon	regulon	regulon				Oligo	Oligo
PTF1A	Nckap5	1	1	20	regulon	regulon	regulon				Oligo	Oligo
KLF1	Nckap5	1	1	20	regulon	regulon	regulon				Oligo	Oligo
ZFX	Nckap5	1	1	20	regulon	regulon	regulon				Oligo	Oligo
SP3	Nckap5	1	1	20	regulon	regulon	regulon				Oligo	Oligo
ETV5	Nckap5	1	1	20	regulon	regulon	regulon				Oligo	Oligo
SP1	Nckap5	1	1	20	regulon	regulon	regulon				Oligo	Oligo
E2F7	Nckap5	1	1	20	regulon	regulon	regulon				Oligo	Oligo
FOXJ3	Nedd4l	1	1	20	regulon	regulon	regulon				Oligo	Oligo
SP1	Nedd4l	1	1	20	regulon	regulon	regulon				Oligo	Oligo
ETS2	Nedd4l	1	1	20	regulon	regulon	regulon				Oligo	Oligo
STAT1	Negr1	1	1	20	regulon	regulon	regulon				Oligo	Oligo
E2F3	Negr1	1	1	20	regulon	regulon	regulon				Oligo	Oligo
IRF3	Negr1	1	1	20	regulon	regulon	regulon				Oligo	Oligo
RREB1	Negr1	1	1	20	regulon	regulon	regulon				Oligo	Oligo
EGR1	Negr1	1	1	20	regulon	regulon	regulon				Oligo	Oligo
ZBT17	Negr1	1	1	20	regulon	regulon	regulon				Oligo	Oligo
KLF1	Negr1	1	1	20	regulon	regulon	regulon				Oligo	Oligo
SP2	Negr1	1	1	20	regulon	regulon	regulon				Oligo	Oligo
ZFX	Negr1	1	1	20	regulon	regulon	regulon				Oligo	Oligo
RFX1	Negr1	1	1	20	regulon	regulon	regulon				Oligo	Oligo
SP1	Negr1	1	1	20	regulon	regulon	regulon				Oligo	Oligo
KLF6	Negr1	1	1	20	regulon	regulon	regulon				Oligo	Oligo
SPI1	Negr1	1	1	20	regulon	regulon	regulon				Oligo	Oligo
FLI1	Negr1	1	1	20	regulon	regulon	regulon				Oligo	Oligo
FOXJ3	Negr1	1	1	20	regulon	regulon	regulon				Oligo	Oligo
ETS2	Negr1	1	1	20	regulon	regulon	regulon				Oligo	Oligo
SMAD3	Negr1	1	1	20	regulon	regulon	regulon				Oligo	Oligo
SP3	Negr1	1	1	20	regulon	regulon	regulon				Oligo	Oligo
KLF5	Negr1	1	1	20	regulon	regulon	regulon				Oligo	Oligo
MAZ	Negr1	1	1	20	regulon	regulon	regulon				Oligo	Oligo
WT1	Negr1	1	1	20	regulon	regulon	regulon				Oligo	Oligo
EGR2	Negr1	1	1	20	regulon	regulon	regulon				Oligo	Oligo
ELF5	Negr1	1	1	20	regulon	regulon	regulon				Oligo	Oligo
PTF1A	Negr1	1	1	20	regulon	regulon	regulon				Oligo	Oligo
GATA1	Negr1	1	1	20	regulon	regulon	regulon				Oligo	Oligo
SALL1	Negr1	1	1	20	regulon	regulon	regulon				Oligo	Oligo
SP3	Nipbl	1	1	20	regulon	regulon	regulon				Oligo	Oligo
FOXJ3	Nipbl	1	1	20	regulon	regulon	regulon				Oligo	Oligo
MAZ	Nr3c2	1	1	20	regulon	regulon	regulon				Oligo	Oligo
SP1	Nr3c2	1	1	20	regulon	regulon	regulon				Oligo	Oligo
MAZ	Nrg1	1	1	20	regulon	regulon	regulon				Oligo	Oligo
E2F3	Nrg1	1	1	20	regulon	regulon	regulon				Oligo	Oligo
WT1	Nrg3	1	1	20	regulon	regulon	regulon				Oligo	Oligo
SP1	Nrg3	1	1	20	regulon	regulon	regulon				Oligo	Oligo
EGR2	Nrg3	1	1	20	regulon	regulon	regulon				Oligo	Oligo
SP3	Nrg3	1	1	20	regulon	regulon	regulon				Oligo	Oligo
SP2	Nrg3	1	1	20	regulon	regulon	regulon				Oligo	Oligo
SALL1	Nrg3	1	1	20	regulon	regulon	regulon				Oligo	Oligo
RFX1	Nrg3	1	1	20	regulon	regulon	regulon				Oligo	Oligo
MAZ	Nrg3	1	1	20	regulon	regulon	regulon				Oligo	Oligo
E2F3	Nrg3	1	1	20	regulon	regulon	regulon				Oligo	Oligo
SP5	Nrxn1	1	1	20	regulon	regulon	regulon				Oligo	Oligo
KLF15	Nrxn1	1	1	20	regulon	regulon	regulon				Oligo	Oligo
SP2	Nrxn1	1	1	20	regulon	regulon	regulon				Oligo	Oligo
PTF1A	Nrxn1	1	1	20	regulon	regulon	regulon				Oligo	Oligo
SP1	Nrxn1	1	1	20	regulon	regulon	regulon				Oligo	Oligo
WT1	Nrxn1	1	1	20	regulon	regulon	regulon				Oligo	Oligo
SALL4	Nrxn1	1	1	20	regulon	regulon	regulon				Oligo	Oligo
ELF5	Nrxn1	1	1	20	regulon	regulon	regulon				Oligo	Oligo
FLI1	Nrxn1	1	1	20	regulon	regulon	regulon				Oligo	Oligo
MAZ	Nrxn1	1	1	20	regulon	regulon	regulon				Oligo	Oligo
EGR2	Nrxn1	1	1	20	regulon	regulon	regulon				Oligo	Oligo
SALL1	Nrxn1	1	1	20	regulon	regulon	regulon				Oligo	Oligo
ZN281	Nrxn1	1	1	20	regulon	regulon	regulon				Oligo	Oligo
IRF3	Nrxn1	1	1	20	regulon	regulon	regulon				Oligo	Oligo
TFE2	Nrxn1	1	1	20	regulon	regulon	regulon				Oligo	Oligo
ETS2	Nrxn1	1	1	20	regulon	regulon	regulon				Oligo	Oligo
E2F3	Nrxn1	1	1	20	regulon	regulon	regulon				Oligo	Oligo
SP3	Nrxn1	1	1	20	regulon	regulon	regulon				Oligo	Oligo
KLF5	Nrxn1	1	1	20	regulon	regulon	regulon				Oligo	Oligo
EGR1	Nrxn1	1	1	20	regulon	regulon	regulon				Oligo	Oligo
MAZ	Nrxn2	1	1	20	regulon	regulon	regulon				Oligo	Oligo
SP3	Nrxn2	1	1	20	regulon	regulon	regulon				Oligo	Oligo
WT1	Nrxn2	1	1	20	regulon	regulon	regulon				Oligo	Oligo
PTF1A	Nrxn2	1	1	20	regulon	regulon	regulon				Oligo	Oligo
SP1	Nrxn2	1	1	20	regulon	regulon	regulon				Oligo	Oligo
ETS2	Nrxn2	1	1	20	regulon	regulon	regulon				Oligo	Oligo
OLIG2	Nrxn3	1	1	20	regulon	regulon	regulon				Oligo	Oligo
E2F3	Nrxn3	1	1	20	regulon	regulon	regulon				Oligo	Oligo
SP2	Nrxn3	1	1	20	regulon	regulon	regulon				Oligo	Oligo
EGR2	Nrxn3	1	1	20	regulon	regulon	regulon				Oligo	Oligo
EGR1	Nrxn3	1	1	20	regulon	regulon	regulon				Oligo	Oligo
ZN281	Nrxn3	1	1	20	regulon	regulon	regulon				Oligo	Oligo
SP1	Nrxn3	1	1	20	regulon	regulon	regulon				Oligo	Oligo
STAT1	Nrxn3	1	1	20	regulon	regulon	regulon				Oligo	Oligo
ETS2	Nrxn3	1	1	20	regulon	regulon	regulon				Oligo	Oligo
PTF1A	Nrxn3	1	1	20	regulon	regulon	regulon				Oligo	Oligo
TFE2	Nrxn3	1	1	20	regulon	regulon	regulon				Oligo	Oligo
SMAD3	Nrxn3	1	1	20	regulon	regulon	regulon				Oligo	Oligo
KLF5	Nrxn3	1	1	20	regulon	regulon	regulon				Oligo	Oligo
ZFX	Nrxn3	1	1	20	regulon	regulon	regulon				Oligo	Oligo
WT1	Nrxn3	1	1	20	regulon	regulon	regulon				Oligo	Oligo
SMAD1	Nrxn3	1	1	20	regulon	regulon	regulon				Oligo	Oligo
FOXJ3	Nrxn3	1	1	20	regulon	regulon	regulon				Oligo	Oligo
SMAD2	Nrxn3	1	1	20	regulon	regulon	regulon				Oligo	Oligo
SPI1	Nrxn3	1	1	20	regulon	regulon	regulon				Oligo	Oligo
BHA15	Nrxn3	1	1	20	regulon	regulon	regulon				Oligo	Oligo
ELF5	Nrxn3	1	1	20	regulon	regulon	regulon				Oligo	Oligo
FLI1	Nrxn3	1	1	20	regulon	regulon	regulon				Oligo	Oligo
SP3	Nrxn3	1	1	20	regulon	regulon	regulon				Oligo	Oligo
RREB1	Nrxn3	1	1	20	regulon	regulon	regulon				Oligo	Oligo
KLF6	Nrxn3	1	1	20	regulon	regulon	regulon				Oligo	Oligo
ASCL1	Nrxn3	1	1	20	regulon	regulon	regulon				Oligo	Oligo
SALL1	Nrxn3	1	1	20	regulon	regulon	regulon				Oligo	Oligo
KLF1	Nrxn3	1	1	20	regulon	regulon	regulon				Oligo	Oligo
MAZ	Nrxn3	1	1	20	regulon	regulon	regulon				Oligo	Oligo
KLF15	Otud7a	1	1	20	regulon	regulon	regulon				Oligo	Oligo
MAZ	Pak3	1	1	20	regulon	regulon	regulon				Oligo	Oligo
E2F3	Pak3	1	1	20	regulon	regulon	regulon				Oligo	Oligo
SP5	Pbx1	1	1	20	regulon	regulon	regulon				Oligo	Oligo
MAZ	Pbx1	1	1	20	regulon	regulon	regulon				Oligo	Oligo
PRD16	Pbx1	1	1	20	regulon	regulon	regulon				Oligo	Oligo
SP2	Pbx1	1	1	20	regulon	regulon	regulon				Oligo	Oligo
SP3	Pbx1	1	1	20	regulon	regulon	regulon				Oligo	Oligo
WT1	Pbx1	1	1	20	regulon	regulon	regulon				Oligo	Oligo
ELF5	Pbx1	1	1	20	regulon	regulon	regulon				Oligo	Oligo
IRF3	Pbx1	1	1	20	regulon	regulon	regulon				Oligo	Oligo
SALL4	Pbx1	1	1	20	regulon	regulon	regulon				Oligo	Oligo
SP1	Pbx1	1	1	20	regulon	regulon	regulon				Oligo	Oligo
SP1	Pcca	1	1	20	regulon	regulon	regulon				Oligo	Oligo
MAZ	Pcca	1	1	20	regulon	regulon	regulon				Oligo	Oligo
SP2	Pcdh10	1	1	20	regulon	regulon	regulon				Oligo	Oligo
MAZ	Pcdh10	1	1	20	regulon	regulon	regulon				Oligo	Oligo
SMAD2	Pcdh7	1	1	20	regulon	regulon	regulon				Oligo	Oligo
PTF1A	Pcdh7	1	1	20	regulon	regulon	regulon				Oligo	Oligo
ZFX	Pcdh7	1	1	20	regulon	regulon	regulon				Oligo	Oligo
SP3	Pcdh7	1	1	20	regulon	regulon	regulon				Oligo	Oligo
FUBP1	Pcdh7	1	1	20	regulon	regulon	regulon				Oligo	Oligo
IRF3	Pcdh7	1	1	20	regulon	regulon	regulon				Oligo	Oligo
WT1	Pcdh7	1	1	20	regulon	regulon	regulon				Oligo	Oligo
KLF3	Pcdh7	1	1	20	regulon	regulon	regulon				Oligo	Oligo
SALL4	Pcdh7	1	1	20	regulon	regulon	regulon				Oligo	Oligo
SP2	Pcdh7	1	1	20	regulon	regulon	regulon				Oligo	Oligo
SP1	Pcdh7	1	1	20	regulon	regulon	regulon				Oligo	Oligo
KLF5	Pcdh7	1	1	20	regulon	regulon	regulon				Oligo	Oligo
EGR2	Pcdh7	1	1	20	regulon	regulon	regulon				Oligo	Oligo
FLI1	Pcdh7	1	1	20	regulon	regulon	regulon				Oligo	Oligo
SP5	Pcdh7	1	1	20	regulon	regulon	regulon				Oligo	Oligo
KLF15	Pcdh7	1	1	20	regulon	regulon	regulon				Oligo	Oligo
ZN281	Pcdh7	1	1	20	regulon	regulon	regulon				Oligo	Oligo
GATA1	Pcdh7	1	1	20	regulon	regulon	regulon				Oligo	Oligo
ELF5	Pcdh7	1	1	20	regulon	regulon	regulon				Oligo	Oligo
PRD16	Pcdh7	1	1	20	regulon	regulon	regulon				Oligo	Oligo
KLF6	Pcdh7	1	1	20	regulon	regulon	regulon				Oligo	Oligo
FOXJ3	Pcdh7	1	1	20	regulon	regulon	regulon				Oligo	Oligo
HNF6	Pcdh7	1	1	20	regulon	regulon	regulon				Oligo	Oligo
E2F6	Pcdh7	1	1	20	regulon	regulon	regulon				Oligo	Oligo
IRF7	Pcdh7	1	1	20	regulon	regulon	regulon				Oligo	Oligo
E2F3	Pcdh7	1	1	20	regulon	regulon	regulon				Oligo	Oligo
EGR4	Pcdh7	1	1	20	regulon	regulon	regulon				Oligo	Oligo
ETS2	Pcdh7	1	1	20	regulon	regulon	regulon				Oligo	Oligo
SALL1	Pcdh7	1	1	20	regulon	regulon	regulon				Oligo	Oligo
MAZ	Pcdh7	1	1	20	regulon	regulon	regulon				Oligo	Oligo
EGR1	Pcdh7	1	1	20	regulon	regulon	regulon				Oligo	Oligo
WT1	Pclo	1	1	20	regulon	regulon	regulon				Oligo	Oligo
ETS2	Pclo	1	1	20	regulon	regulon	regulon				Oligo	Oligo
MAZ	Pclo	1	1	20	regulon	regulon	regulon				Oligo	Oligo
EGR1	Pclo	1	1	20	regulon	regulon	regulon				Oligo	Oligo
SP3	Pde4b	1	1	20	regulon	regulon	regulon				Oligo	Oligo
WT1	Pde4b	1	1	20	regulon	regulon	regulon				Oligo	Oligo
MAZ	Pde4b	1	1	20	regulon	regulon	regulon				Oligo	Oligo
SP2	Pde4b	1	1	20	regulon	regulon	regulon				Oligo	Oligo
SP1	Pde4b	1	1	20	regulon	regulon	regulon				Oligo	Oligo
FLI1	Pde4b	1	1	20	regulon	regulon	regulon				Oligo	Oligo
SALL1	Pde4b	1	1	20	regulon	regulon	regulon				Oligo	Oligo
EGR1	Pde4d	1	1	20	regulon	regulon	regulon				Oligo	Oligo
SP3	Pde4d	1	1	20	regulon	regulon	regulon				Oligo	Oligo
EGR2	Pde4d	1	1	20	regulon	regulon	regulon				Oligo	Oligo
KLF5	Pde4d	1	1	20	regulon	regulon	regulon				Oligo	Oligo
FOXJ3	Pde4d	1	1	20	regulon	regulon	regulon				Oligo	Oligo
IRF3	Pde4d	1	1	20	regulon	regulon	regulon				Oligo	Oligo
TFE2	Pde4d	1	1	20	regulon	regulon	regulon				Oligo	Oligo
SMAD1	Pde4d	1	1	20	regulon	regulon	regulon				Oligo	Oligo
SPI1	Pde4d	1	1	20	regulon	regulon	regulon				Oligo	Oligo
ETS2	Pde4d	1	1	20	regulon	regulon	regulon				Oligo	Oligo
HAND1	Pde4d	1	1	20	regulon	regulon	regulon				Oligo	Oligo
MAZ	Pde4d	1	1	20	regulon	regulon	regulon				Oligo	Oligo
RREB1	Pde4d	1	1	20	regulon	regulon	regulon				Oligo	Oligo
ZN281	Pde4d	1	1	20	regulon	regulon	regulon				Oligo	Oligo
STAT1	Pde4d	1	1	20	regulon	regulon	regulon				Oligo	Oligo
FOXF1	Pde4d	1	1	20	regulon	regulon	regulon				Oligo	Oligo
PTF1A	Pde4d	1	1	20	regulon	regulon	regulon				Oligo	Oligo
SP2	Pde4d	1	1	20	regulon	regulon	regulon				Oligo	Oligo
SMAD3	Pde4d	1	1	20	regulon	regulon	regulon				Oligo	Oligo
HMGA1	Pde4d	1	1	20	regulon	regulon	regulon				Oligo	Oligo
E2F3	Pde4d	1	1	20	regulon	regulon	regulon				Oligo	Oligo
MYF5	Pde4d	1	1	20	regulon	regulon	regulon				Oligo	Oligo
ASCL1	Pde4d	1	1	20	regulon	regulon	regulon				Oligo	Oligo
KLF1	Pde4d	1	1	20	regulon	regulon	regulon				Oligo	Oligo
FLI1	Pde4d	1	1	20	regulon	regulon	regulon				Oligo	Oligo
SALL1	Pde4d	1	1	20	regulon	regulon	regulon				Oligo	Oligo
WT1	Pde4d	1	1	20	regulon	regulon	regulon				Oligo	Oligo
BHA15	Pde4d	1	1	20	regulon	regulon	regulon				Oligo	Oligo
SP1	Pde4d	1	1	20	regulon	regulon	regulon				Oligo	Oligo
ELF5	Pde4d	1	1	20	regulon	regulon	regulon				Oligo	Oligo
MAZ	Pkn2	1	1	20	regulon	regulon	regulon				Oligo	Oligo
FLI1	Pkn2	1	1	20	regulon	regulon	regulon				Oligo	Oligo
MAZ	Polb	1	1	20	regulon	regulon	regulon				Oligo	Oligo
WT1	Ppfia2	1	1	20	regulon	regulon	regulon				Oligo	Oligo
MAZ	Ppfia2	1	1	20	regulon	regulon	regulon				Oligo	Oligo
SP3	Ppfia2	1	1	20	regulon	regulon	regulon				Oligo	Oligo
SP1	Ppfia2	1	1	20	regulon	regulon	regulon				Oligo	Oligo
PTF1A	Ppfia2	1	1	20	regulon	regulon	regulon				Oligo	Oligo
ETS2	Ppfia2	1	1	20	regulon	regulon	regulon				Oligo	Oligo
KLF5	Prr5l	1	1	20	regulon	regulon	regulon				Oligo	Oligo
FUBP1	Prr5l	1	1	20	regulon	regulon	regulon				Oligo	Oligo
HMGA1	Prr5l	1	1	20	regulon	regulon	regulon				Oligo	Oligo
KLF1	Prr5l	1	1	20	regulon	regulon	regulon				Oligo	Oligo
SP1	Prr5l	1	1	20	regulon	regulon	regulon				Oligo	Oligo
EGR1	Prr5l	1	1	20	regulon	regulon	regulon				Oligo	Oligo
WT1	Prr5l	1	1	20	regulon	regulon	regulon				Oligo	Oligo
SPI1	Prr5l	1	1	20	regulon	regulon	regulon				Oligo	Oligo
SP3	Prr5l	1	1	20	regulon	regulon	regulon				Oligo	Oligo
RREB1	Prr5l	1	1	20	regulon	regulon	regulon				Oligo	Oligo
FLI1	Prr5l	1	1	20	regulon	regulon	regulon				Oligo	Oligo
ZBT17	Prr5l	1	1	20	regulon	regulon	regulon				Oligo	Oligo
EGR2	Prr5l	1	1	20	regulon	regulon	regulon				Oligo	Oligo
E2F3	Prr5l	1	1	20	regulon	regulon	regulon				Oligo	Oligo
FOXJ3	Prr5l	1	1	20	regulon	regulon	regulon				Oligo	Oligo
SP2	Prr5l	1	1	20	regulon	regulon	regulon				Oligo	Oligo
KLF15	Prr5l	1	1	20	regulon	regulon	regulon				Oligo	Oligo
KLF6	Prr5l	1	1	20	regulon	regulon	regulon				Oligo	Oligo
MAZ	Prr5l	1	1	20	regulon	regulon	regulon				Oligo	Oligo
TFE2	Prr5l	1	1	20	regulon	regulon	regulon				Oligo	Oligo
SALL1	Prr5l	1	1	20	regulon	regulon	regulon				Oligo	Oligo
ETS2	Prr5l	1	1	20	regulon	regulon	regulon				Oligo	Oligo
ELF5	Prr5l	1	1	20	regulon	regulon	regulon				Oligo	Oligo
IRF3	Prr5l	1	1	20	regulon	regulon	regulon				Oligo	Oligo
TFE2	Ptpn4	1	1	20	regulon	regulon	regulon				Oligo	Oligo
SP1	Ptpn4	1	1	20	regulon	regulon	regulon				Oligo	Oligo
ETS2	Rapgef1	1	1	20	regulon	regulon	regulon				Oligo	Oligo
GATA1	Rapgef1	1	1	20	regulon	regulon	regulon				Oligo	Oligo
MAZ	Rapgef2	1	1	20	regulon	regulon	regulon				Oligo	Oligo
MAZ	Rnf121	1	1	20	regulon	regulon	regulon				Oligo	Oligo
KLF6	Rnf121	1	1	20	regulon	regulon	regulon				Oligo	Oligo
E2F3	Rnf121	1	1	20	regulon	regulon	regulon				Oligo	Oligo
KLF1	Rnf220	1	1	20	regulon	regulon	regulon				Oligo	Oligo
FLI1	Rnf220	1	1	20	regulon	regulon	regulon				Oligo	Oligo
SP1	Rnf220	1	1	20	regulon	regulon	regulon				Oligo	Oligo
E2F3	Rnf220	1	1	20	regulon	regulon	regulon				Oligo	Oligo
SP3	Rnf220	1	1	20	regulon	regulon	regulon				Oligo	Oligo
ELF5	Rnf220	1	1	20	regulon	regulon	regulon				Oligo	Oligo
WT1	Rnf220	1	1	20	regulon	regulon	regulon				Oligo	Oligo
SALL1	Rnf220	1	1	20	regulon	regulon	regulon				Oligo	Oligo
KLF5	Rnf220	1	1	20	regulon	regulon	regulon				Oligo	Oligo
SP2	Rnf220	1	1	20	regulon	regulon	regulon				Oligo	Oligo
KLF15	Rnf220	1	1	20	regulon	regulon	regulon				Oligo	Oligo
ETS2	Rnf220	1	1	20	regulon	regulon	regulon				Oligo	Oligo
MAZ	Rnf220	1	1	20	regulon	regulon	regulon				Oligo	Oligo
IRF3	Rora	1	1	20	regulon	regulon	regulon				Oligo	Oligo
GATA1	Rora	1	1	20	regulon	regulon	regulon				Oligo	Oligo
EGR1	Rora	1	1	20	regulon	regulon	regulon				Oligo	Oligo
SP5	Rora	1	1	20	regulon	regulon	regulon				Oligo	Oligo
ZFX	Rora	1	1	20	regulon	regulon	regulon				Oligo	Oligo
HMGA1	Rora	1	1	20	regulon	regulon	regulon				Oligo	Oligo
SALL4	Rora	1	1	20	regulon	regulon	regulon				Oligo	Oligo
EGR2	Rora	1	1	20	regulon	regulon	regulon				Oligo	Oligo
KLF5	Rora	1	1	20	regulon	regulon	regulon				Oligo	Oligo
MEF2A	Rora	1	1	20	regulon	regulon	regulon				Oligo	Oligo
SPI1	Rora	1	1	20	regulon	regulon	regulon				Oligo	Oligo
MAZ	Rora	1	1	20	regulon	regulon	regulon				Oligo	Oligo
KLF15	Rora	1	1	20	regulon	regulon	regulon				Oligo	Oligo
ELF5	Rora	1	1	20	regulon	regulon	regulon				Oligo	Oligo
ZN281	Rora	1	1	20	regulon	regulon	regulon				Oligo	Oligo
RFX1	Rora	1	1	20	regulon	regulon	regulon				Oligo	Oligo
E2F7	Rora	1	1	20	regulon	regulon	regulon				Oligo	Oligo
EGR4	Rora	1	1	20	regulon	regulon	regulon				Oligo	Oligo
MYF5	Rora	1	1	20	regulon	regulon	regulon				Oligo	Oligo
WT1	Rora	1	1	20	regulon	regulon	regulon				Oligo	Oligo
KLF1	Rora	1	1	20	regulon	regulon	regulon				Oligo	Oligo
KLF6	Rora	1	1	20	regulon	regulon	regulon				Oligo	Oligo
SALL1	Rora	1	1	20	regulon	regulon	regulon				Oligo	Oligo
E2F3	Rora	1	1	20	regulon	regulon	regulon				Oligo	Oligo
TFE2	Rora	1	1	20	regulon	regulon	regulon				Oligo	Oligo
FLI1	Rora	1	1	20	regulon	regulon	regulon				Oligo	Oligo
SMAD2	Rora	1	1	20	regulon	regulon	regulon				Oligo	Oligo
E2F6	Rora	1	1	20	regulon	regulon	regulon				Oligo	Oligo
SP3	Rora	1	1	20	regulon	regulon	regulon				Oligo	Oligo
BHA15	Rora	1	1	20	regulon	regulon	regulon				Oligo	Oligo
ASCL1	Rora	1	1	20	regulon	regulon	regulon				Oligo	Oligo
OLIG2	Rora	1	1	20	regulon	regulon	regulon				Oligo	Oligo
FOXF1	Rora	1	1	20	regulon	regulon	regulon				Oligo	Oligo
ETV5	Rora	1	1	20	regulon	regulon	regulon				Oligo	Oligo
FUBP1	Rora	1	1	20	regulon	regulon	regulon				Oligo	Oligo
ZBT17	Rora	1	1	20	regulon	regulon	regulon				Oligo	Oligo
ETS2	Rora	1	1	20	regulon	regulon	regulon				Oligo	Oligo
PTF1A	Rora	1	1	20	regulon	regulon	regulon				Oligo	Oligo
KLF3	Rora	1	1	20	regulon	regulon	regulon				Oligo	Oligo
STAT1	Rora	1	1	20	regulon	regulon	regulon				Oligo	Oligo
SP1	Rora	1	1	20	regulon	regulon	regulon				Oligo	Oligo
RREB1	Rora	1	1	20	regulon	regulon	regulon				Oligo	Oligo
SP2	Rora	1	1	20	regulon	regulon	regulon				Oligo	Oligo
IRF7	Rora	1	1	20	regulon	regulon	regulon				Oligo	Oligo
FOXJ3	Rora	1	1	20	regulon	regulon	regulon				Oligo	Oligo
ELF5	Scmh1	1	1	20	regulon	regulon	regulon				Oligo	Oligo
IRF3	Sema5a	1	1	20	regulon	regulon	regulon				Oligo	Oligo
SP1	Sema5a	1	1	20	regulon	regulon	regulon				Oligo	Oligo
SP3	Setbp1	1	1	20	regulon	regulon	regulon				Oligo	Oligo
WT1	Sgip1	1	1	20	regulon	regulon	regulon				Oligo	Oligo
SP3	Sgip1	1	1	20	regulon	regulon	regulon				Oligo	Oligo
MAZ	Sgip1	1	1	20	regulon	regulon	regulon				Oligo	Oligo
ETS2	Sgip1	1	1	20	regulon	regulon	regulon				Oligo	Oligo
SP1	Slc24a2	1	1	20	regulon	regulon	regulon				Oligo	Oligo
KLF1	Slc24a2	1	1	20	regulon	regulon	regulon				Oligo	Oligo
SP2	Slc24a2	1	1	20	regulon	regulon	regulon				Oligo	Oligo
E2F3	Slc24a2	1	1	20	regulon	regulon	regulon				Oligo	Oligo
ELF5	Slc24a2	1	1	20	regulon	regulon	regulon				Oligo	Oligo
FLI1	Slc24a2	1	1	20	regulon	regulon	regulon				Oligo	Oligo
SP3	Slc24a2	1	1	20	regulon	regulon	regulon				Oligo	Oligo
IRF3	Slc24a2	1	1	20	regulon	regulon	regulon				Oligo	Oligo
EGR2	Slc24a2	1	1	20	regulon	regulon	regulon				Oligo	Oligo
TBX5	Slc24a2	1	1	20	regulon	regulon	regulon				Oligo	Oligo
KLF6	Slc24a2	1	1	20	regulon	regulon	regulon				Oligo	Oligo
EGR1	Slc24a2	1	1	20	regulon	regulon	regulon				Oligo	Oligo
ETS2	Slc24a2	1	1	20	regulon	regulon	regulon				Oligo	Oligo
ZBT17	Slc24a2	1	1	20	regulon	regulon	regulon				Oligo	Oligo
WT1	Slc24a2	1	1	20	regulon	regulon	regulon				Oligo	Oligo
MAZ	Slc24a2	1	1	20	regulon	regulon	regulon				Oligo	Oligo
KLF15	Slc24a2	1	1	20	regulon	regulon	regulon				Oligo	Oligo
SALL1	Slc24a2	1	1	20	regulon	regulon	regulon				Oligo	Oligo
WT1	Slc6a1	1	1	20	regulon	regulon	regulon				Oligo	Oligo
SP3	Smarca2	1	1	20	regulon	regulon	regulon				Oligo	Oligo
MAZ	Smarca2	1	1	20	regulon	regulon	regulon				Oligo	Oligo
ETS2	Spock1	1	1	20	regulon	regulon	regulon				Oligo	Oligo
AP2B	Spock1	1	1	20	regulon	regulon	regulon				Oligo	Oligo
SRY	Spock1	1	1	20	regulon	regulon	regulon				Oligo	Oligo
SP3	Sptbn1	1	1	20	regulon	regulon	regulon				Oligo	Oligo
MAZ	Srgap1	1	1	20	regulon	regulon	regulon				Oligo	Oligo
RFX1	Srgap1	1	1	20	regulon	regulon	regulon				Oligo	Oligo
MAZ	Sybu	1	1	20	regulon	regulon	regulon				Oligo	Oligo
SP4	Sytl2	1	1	20	regulon	regulon	regulon				Oligo	Oligo
E2F3	Tanc2	1	1	20	regulon	regulon	regulon				Oligo	Oligo
PTF1A	Tanc2	1	1	20	regulon	regulon	regulon				Oligo	Oligo
KLF1	Tanc2	1	1	20	regulon	regulon	regulon				Oligo	Oligo
SP2	Tanc2	1	1	20	regulon	regulon	regulon				Oligo	Oligo
MAZ	Tanc2	1	1	20	regulon	regulon	regulon				Oligo	Oligo
ELF5	Tjp1	1	1	20	regulon	regulon	regulon				Oligo	Oligo
WT1	Tjp1	1	1	20	regulon	regulon	regulon				Oligo	Oligo
SP1	Tln2	1	1	20	regulon	regulon	regulon				Oligo	Oligo
E2F3	Tln2	1	1	20	regulon	regulon	regulon				Oligo	Oligo
ETS2	Tmeff2	1	1	20	regulon	regulon	regulon				Oligo	Oligo
EGR2	Tmod2	1	1	20	regulon	regulon	regulon				Oligo	Oligo
SRY	Tmod2	1	1	20	regulon	regulon	regulon				Oligo	Oligo
KLF15	Tmod2	1	1	20	regulon	regulon	regulon				Oligo	Oligo
WT1	Tnik	1	1	20	regulon	regulon	regulon				Oligo	Oligo
SP1	Tnik	1	1	20	regulon	regulon	regulon				Oligo	Oligo
SALL4	Tnik	1	1	20	regulon	regulon	regulon				Oligo	Oligo
SP3	Tnr	1	1	20	regulon	regulon	regulon				Oligo	Oligo
WT1	Tnr	1	1	20	regulon	regulon	regulon				Oligo	Oligo
SP1	Tnr	1	1	20	regulon	regulon	regulon				Oligo	Oligo
KLF15	Tnr	1	1	20	regulon	regulon	regulon				Oligo	Oligo
HNF6	Tnr	1	1	20	regulon	regulon	regulon				Oligo	Oligo
MEF2A	Tnr	1	1	20	regulon	regulon	regulon				Oligo	Oligo
GATA1	Tnr	1	1	20	regulon	regulon	regulon				Oligo	Oligo
SMAD2	Tnr	1	1	20	regulon	regulon	regulon				Oligo	Oligo
RREB1	Tnr	1	1	20	regulon	regulon	regulon				Oligo	Oligo
BHA15	Tnr	1	1	20	regulon	regulon	regulon				Oligo	Oligo
ZBT17	Tnr	1	1	20	regulon	regulon	regulon				Oligo	Oligo
TBX5	Tnr	1	1	20	regulon	regulon	regulon				Oligo	Oligo
E2F7	Tnr	1	1	20	regulon	regulon	regulon				Oligo	Oligo
SPI1	Tnr	1	1	20	regulon	regulon	regulon				Oligo	Oligo
PTF1A	Tnr	1	1	20	regulon	regulon	regulon				Oligo	Oligo
ETV5	Tnr	1	1	20	regulon	regulon	regulon				Oligo	Oligo
SALL1	Tnr	1	1	20	regulon	regulon	regulon				Oligo	Oligo
EGR1	Tnr	1	1	20	regulon	regulon	regulon				Oligo	Oligo
SP2	Tnr	1	1	20	regulon	regulon	regulon				Oligo	Oligo
E2F3	Tnr	1	1	20	regulon	regulon	regulon				Oligo	Oligo
TFE2	Tnr	1	1	20	regulon	regulon	regulon				Oligo	Oligo
ASCL1	Tnr	1	1	20	regulon	regulon	regulon				Oligo	Oligo
FUBP1	Tnr	1	1	20	regulon	regulon	regulon				Oligo	Oligo
ELF5	Tnr	1	1	20	regulon	regulon	regulon				Oligo	Oligo
MYF5	Tnr	1	1	20	regulon	regulon	regulon				Oligo	Oligo
OLIG2	Tnr	1	1	20	regulon	regulon	regulon				Oligo	Oligo
SP5	Tnr	1	1	20	regulon	regulon	regulon				Oligo	Oligo
IRF3	Tnr	1	1	20	regulon	regulon	regulon				Oligo	Oligo
EGR2	Tnr	1	1	20	regulon	regulon	regulon				Oligo	Oligo
MAZ	Tnr	1	1	20	regulon	regulon	regulon				Oligo	Oligo
KLF5	Tnr	1	1	20	regulon	regulon	regulon				Oligo	Oligo
FLI1	Tnr	1	1	20	regulon	regulon	regulon				Oligo	Oligo
ETS2	Tnr	1	1	20	regulon	regulon	regulon				Oligo	Oligo
SP3	Tox	1	1	20	regulon	regulon	regulon				Oligo	Oligo
ELF5	Xkr4	1	1	20	regulon	regulon	regulon				Oligo	Oligo
ASCL1	Xkr4	1	1	20	regulon	regulon	regulon				Oligo	Oligo
SP2	Xkr4	1	1	20	regulon	regulon	regulon				Oligo	Oligo
SP3	Xkr4	1	1	20	regulon	regulon	regulon				Oligo	Oligo
SALL1	Xkr4	1	1	20	regulon	regulon	regulon				Oligo	Oligo
SP1	Xkr4	1	1	20	regulon	regulon	regulon				Oligo	Oligo
KLF1	Xkr4	1	1	20	regulon	regulon	regulon				Oligo	Oligo
MAZ	Xkr4	1	1	20	regulon	regulon	regulon				Oligo	Oligo
ZN281	Xkr4	1	1	20	regulon	regulon	regulon				Oligo	Oligo
WT1	Xkr4	1	1	20	regulon	regulon	regulon				Oligo	Oligo
ETS2	Xkr4	1	1	20	regulon	regulon	regulon				Oligo	Oligo
E2F3	Xkr4	1	1	20	regulon	regulon	regulon				Oligo	Oligo
SALL1	Zdhhc20	1	1	20	regulon	regulon	regulon				Oligo	Oligo
MAZ	Zfp462	1	1	20	regulon	regulon	regulon				Oligo	Oligo
SP3	Zfp462	1	1	20	regulon	regulon	regulon				Oligo	Oligo
WT1	Zfp462	1	1	20	regulon	regulon	regulon				Oligo	Oligo
SP1	Zfp462	1	1	20	regulon	regulon	regulon				Oligo	Oligo
KLF5	Zfp462	1	1	20	regulon	regulon	regulon				Oligo	Oligo
SP2	Zfp462	1	1	20	regulon	regulon	regulon				Oligo	Oligo
ETS2	Zfp462	1	1	20	regulon	regulon	regulon				Oligo	Oligo
SP2	Zfp950	1	1	20	regulon	regulon	regulon				Oligo	Oligo

## Sheet: Blue OL bnet LISA
Transcription Factor	rank	1st Sample p-value	2nd Sample p-value	3rd Sample p-value	4th Sample p-value	5th Sample p-value
HOXC9	1	3.74e-22	0.00882	0.265
FOSB	2	9.65e-16	1.1e-06	0.00476	0.0095	0.0122
MEF2C	3	4.11e-15	2.34e-14	0.00184	0.0152
LHX3	4	3.67e-14
MEF2A	5	8.89e-14	7.98e-09	0.0072	0.644
SUZ12	6	1.69e-11	7.03e-11	1.32e-10	2.12e-10	6.06e-10
ISL1	7	2.69e-10	0.0014	0.00802	0.338
NEUROD2	8	3.68e-10	8.11e-08	1.02e-07	3.63e-06	0.000727
EZH2	9	4.98e-10	3.54e-08	4.37e-07	1.43e-06	0.000154
CDX2	10	6.77e-10	3.41e-09	5.07e-05	0.00519	0.00668
KDM2B	11	1.39e-09	2.88e-08	5.85e-06	1.54e-05	4.22e-05
DPPA2	12	7.5e-09
SMARCA4	13	7.51e-09	1.36e-08	3.99e-08	7.74e-08	1.14e-07
RNF2	14	1.32e-08	1.74e-08	2.18e-06	1.56e-05	2.79e-05
H2AZ	15	4.67e-08	1.16e-06	4.43e-06	0.000282	0.000381
FOS	16	5.58e-08	2.1e-07	3.11e-06	0.00177	0.0031
ASCL1	17	9.16e-08	2.77e-05	0.00309	0.00755	0.0079
OLIG2	18	9.7e-08	3.51e-05	0.00756	0.029
5HMC	19	1.04e-07	1.78e-07	0.000727	0.00398	0.00445
PDX1	20	1.3e-07
JARID2	21	1.64e-07	2.51e-07	9.01e-07	0.000727	0.00105
CTCF	22	2.9e-07	7.27e-07	0.000335	0.000641	0.000727
JUNB	23	4.01e-07	0.00121	0.00355	0.0713	0.184
RXRA	24	5.83e-07	0.000627	0.00289	0.00459	0.00663
KMT2C	25	7.69e-07	0.00224	0.00263	0.00329	0.00448
MECP2	26	7.69e-07	0.000727	0.00157	0.00302	0.00305
UTF1	27	8.01e-07	7.01e-06	0.000105
SCML2	28	8.11e-07	0.00304
SPI1	29	1.1e-06	5.82e-06	1.18e-05	1.18e-05	0.00314
RPA	30	1.69e-06	9.33e-05	0.000313	0.0015	0.00209
SIRT1	31	1.69e-06	0.000338	0.00173	0.00366	0.00976
ZFP42	32	1.69e-06
RELB	33	1.69e-06	0.00424	0.0047	0.00974
CREBBP	34	1.69e-06	0.000128	0.000221	0.000727	0.000727
PHF19	35	2.21e-06	0.00207	0.00434	0.00512	0.00701
NANOG	36	2.25e-06	1.95e-05	0.000516	0.00138	0.00552
MTF2	37	2.28e-06	0.00488
C17orf96	38	2.45e-06	0.0142	0.0642	0.922
ESR1	39	2.67e-06	0.0005	0.00139	0.00341	0.00354
MEN1	40	2.69e-06	0.00203	0.00341	0.00353	0.0036
FEZF2	41	4.35e-06	0.0131
NR4A1	42	5.18e-06	0.022	0.339
ZIC1/2	43	6.03e-06	1.38e-05	2.18e-05	0.00395
TFAP2C	44	6.19e-06	0.525
POU3F3	45	9.72e-06
POU3F2	46	9.79e-06	2.23e-05	2.34e-05	4.31e-05	0.0003
POU5F1	47	1.16e-05	0.000378	0.000553	0.00069	0.000727
CHRM2	48	1.16e-05	0.000208	0.000873	0.00281	0.00336
GRHL3	49	1.19e-05	0.001	0.00728	0.0178
PAX7	50	1.46e-05
GATA4	51	1.81e-05	0.00031	0.000529	0.00204	0.00229
ZFP57	52	2e-05	0.00223	0.00449	0.00804	0.0129
SOX3	53	2.15e-05	0.000167	0.000337	0.00112	0.00388
WT1	54	2.22e-05	4.75e-05	0.00019	0.00233	0.00327
NR3C1	55	2.46e-05	0.00185	0.00213	0.00231	0.00235
KDM4C	56	3.25e-05	0.000443	0.106	0.153	0.249
MYOD1	57	3.46e-05	0.000109	0.000152	0.000166	0.000727
SOX2	58	3.71e-05	9.98e-05	0.000297	0.000337	0.000845
TET1	59	4.74e-05	8.26e-05	0.00353	0.00356	0.00431
TCF12	60	5.17e-05	9.62e-05	0.00104	0.00768	0.0314
HELLS	61	6.35e-05	0.000963
KMT2B	62	7.15e-05	0.00276	0.00424	0.011	0.0284
Input	63	0.000129	0.000727	0.000727	0.000991	0.00156
NRF1	64	0.000131	0.00207	0.118	0.204	0.297
TBX3	65	0.000139	0.00116	0.00146	0.00741	0.0256
IKZF1	66	0.000158	0.000727	0.00398	0.00426	0.00443
TWIST1	67	0.000159	0.00275	0.00437
NCOA2	68	0.00016	0.0424
DMC1	69	0.000162	0.00294	0.00377	0.00498	0.00539
HEY1	70	0.000168	0.00491	0.0114	0.256
RUNX3	71	0.000198	0.000727	0.00145	0.0016	0.00272
CEBPB	72	0.000198	0.000727	0.00827	0.0432	0.0931
RBFOX2	73	0.0002
SMARCA5	74	0.000201	0.00275	0.00339	0.014	0.994
STAT3	75	0.000204	0.000512	0.00167	0.00169	0.00241
SREBF1	76	0.000271	0.00485	0.00644	0.00718	0.0123
TAL1	77	0.000306	0.000404	0.000727	0.000727	0.000761
CBX7	78	0.000334	0.00334	0.00656	0.0135	0.998
NOTCH1	79	0.00035	0.00417	0.00627	0.0263	0.981
CBX2	80	0.000412
RYBP	81	0.000451	0.0044
DDIT3	82	0.00054	0.00398
AEBP2	83	0.000549
TDG	84	0.000558
KMT2A	85	0.000584	0.00267	0.00294
SOX6	86	0.000593	0.00421
E2F3	87	0.000657	0.0212	0.0688	0.0708	0.422
ING1	88	0.000723	0.00366	0.0183	0.913	0.999
GATA1	89	0.000727	0.00276	0.00314	0.00327	0.00346
STAT5A	90	0.000727	0.000752	0.00289	0.003	0.00303
MED23	91	0.000727	0.00325
KDM1A	92	0.000727	0.000727	0.000727	0.00298	0.0033
IRF7	93	0.000727	0.00398	0.00479	1
SRSF1	94	0.000727	0.00313	0.00398
MBD3	95	0.000727	0.00147	0.00175	0.0028	0.0032
ZNF335	96	0.000727	0.00407	0.00574	0.00635	0.00841
BCL6	97	0.000727	0.00413	0.00772	0.0079	0.0122
KDM4A	98	0.000727	0.00255	0.00428
RBPJ	99	0.000727	0.00107	0.0021	0.00219	0.00226
CLOCK	100	0.000727	0.00229	0.00264	0.00317	0.0032
IRF4	101	0.000727	0.000727	0.000727	0.000727	0.00235
STAT1	102	0.000727	0.00313	0.00348	0.00365	0.00464
CBX5	103	0.000727	0.00331	0.00345	0.00435	0.00588
SMC1A	104	0.000727	0.0106	0.0135	0.533	0.728
JUN	105	0.000727	0.00272	0.00345	0.00345	0.0037
H3Pan	106	0.000727
BRD4	107	0.000727	0.00176	0.00276	0.0032	0.00335
KDM4D	108	0.000727	0.00225
EGR2	109	0.000727	0.00297	0.00431	0.00457	0.00758
KDM6A	110	0.000727	0.00314	0.00398	0.00545	0.00578
KDM5A	111	0.000727	0.0154	0.995	0.999
DDX5	112	0.000727	0.00421	0.0049
STAT5B	113	0.000727	0.00157	0.00346	0.00381	0.00383
HAND1	114	0.000727
HMGA2	115	0.000727	0.000727	0.00329	0.00384
FOXO3	116	0.000727	0.0275
SMC5	117	0.000727	0.000727	0.000727	0.00447	0.00448
GATA6	118	0.000727	0.00266	0.0107	0.0157	0.0843
SRSF2	119	0.000727	0.00428	0.117
POU3F1	120	0.000744	0.00419	0.429
FOXA2	121	0.000752	0.000951	0.00161	0.00186	0.00225
MBD1	122	0.000791	0.00286	0.00432	0.00432	0.00455
KDM2A	123	0.00084	0.95
SMAD3	124	0.000846	0.00214	0.00568	0.00638	0.0167
POLR3D	125	0.00087	0.00272	0.00346	0.00424	0.00626
TCF7L1	126	0.000883	0.00146	0.00412	0.00465	0.00508
HIST1H1D	127	0.000931	0.00369	0.00421	0.00431	0.00848
SMAD2	128	0.000942	0.0691	0.168
RBBP5	129	0.000997	0.00364	0.0055	0.00715	0.0117
MYC	130	0.00101	0.0012	0.00134	0.00157	0.0016
FOXP3	131	0.00102	0.00268	0.00475	0.0191	0.949
BMI1	132	0.00103	0.00291	0.00301	0.00359	0.00361
CTNNB1	133	0.00105	0.00308	0.00409	0.00421	0.00424
PPARG	134	0.0011	0.00145	0.002	0.00247	0.00364
STAT2	135	0.00113	0.818	0.905
NPAS4	136	0.00119	0.00431	0.00943
T	137	0.00127	0.00146	0.0016	0.00294	0.00425
ATOH1	138	0.00132	0.118	0.163
MEIS1	139	0.00132	0.00436	0.00479	0.00627	0.0113
OTX2	140	0.00133	0.00267	0.00349	0.00614	0.00628
SLC5A5	141	0.00135	0.00172
NEUROD1	142	0.00138	0.00195	0.00317	0.00489
HDAC3	143	0.00146	0.00149	0.00229	0.00249	0.00349
SMAD1	144	0.00148	0.00372	0.00372	0.00438	0.00442
TNNI2	145	0.0015	0.00353
SMC3	146	0.0015	0.00339	0.00349	0.0697	0.995
ESRRB	147	0.00156	0.00269	0.00326	0.00338	0.00425
DICER1	148	0.00156	0.00313	1	1
IRF8	149	0.00156	0.00462	0.00488	0.00501	0.00611
DNMT3A	150	0.00157	0.00335	0.00419	0.0049	0.00495
HDAC1	151	0.00159	0.00347	0.00367	0.00744	0.00762
BATF	152	0.0016	0.003	0.00306	0.0325	0.0891
NKX3-1	153	0.00161	0.00499	0.00669	0.979	0.997
MAPK8	154	0.00165	0.00538	0.0101	0.0168	0.0377
ATRX	155	0.00169	0.00238	0.00277	0.00278	0.00278
LHX2	156	0.00174	0.00235	0.0172
PAX5	157	0.00177	0.0366	0.0925	0.338	0.983
FOXL2	158	0.00181	0.0725
MED1	159	0.00182	0.00372	0.00385	0.00395	0.00443
EBF1	160	0.00184	0.00321	0.00342	0.00364	0.00398
HSF1	161	0.0019	0.00364	0.0153	0.0266	0.4
MKL1	162	0.00191	0.00337	0.0036
ARID1A	163	0.00191	0.00363
TRIM33	164	0.00192	0.0391	0.0972	0.989	0.998
PBX1	165	0.00197	0.104
NCOA3	166	0.00212
RAG2	167	0.00215	0.00438	0.00704	0.9	0.997
NFATC2	168	0.00218	0.992
BARX1	169	0.00219
RELA	170	0.00219	0.00396	0.00398	0.00797	0.00807
SIN3A	171	0.00221	0.00438	0.00446	0.00515	0.00715
ACTB	172	0.00223
TRIM28	173	0.00224	0.00282	0.00285	0.00333	0.00338
MKL2	174	0.00228	0.00297	0.0072
NLRC5	175	0.00229	0.00369	0.00375	0.00398	0.00431
TP53	176	0.00231	0.00231	0.00384	0.0041	0.0081
AR	177	0.00232	0.00293	0.00301	0.00345	0.00356
GATA2	178	0.00234	0.00272	0.00618	0.00805	0.00995
RUNX1	179	0.00235	0.0031	0.00407	0.00445	0.00508
NR1H2	180	0.00235	0.0501	0.912	0.975
SETDB1	181	0.00236	0.00262	0.00269	0.00353	0.00368
TET3	182	0.00238	0.00293	0.00439	0.00586	1
TEAD4	183	0.00241
PAX6	184	0.00242	0.00541	0.0217	0.0634
YY1	185	0.00242	0.00301	0.00387	0.0039	0.00744
PRDM1	186	0.00246	0.00302	0.112	0.248
NCOR2	187	0.00246	0.99	0.998	1
ARNTL	188	0.00248	0.00298	0.00338	0.00349	0.0037
KDM6B	189	0.00249	0.013	0.0238	0.0835	0.232
SIRT6	190	0.00251	0.003	0.00301	0.00301	0.999
SUPT6H	191	0.00255	0.00628
CBFB	192	0.00255	0.00258	0.0113	0.996	1
RAD21	193	0.00256	0.00294	0.0366	0.348	0.656
SOX9	194	0.00258	0.00757	0.0748	0.22	0.722
DNMT3B	195	0.00258	0.00448
FOXD3	196	0.00258	0.00361	0.00422	0.00464	0.00591
SOX11	197	0.0026	0.00426	0.00437
FOXO1	198	0.0026	0.00287	0.0439	0.15	0.621
CEBPA	199	0.00268	0.00345	0.00517	0.00625	0.0102
EHMT2	200	0.00269	0.0176
MYO1C	201	0.00269
PARP1	202	0.00275	0.0032
LDB1	203	0.00277	0.0122	0.162	0.999
TCF7	204	0.00281	0.00412	0.0155	0.0626	0.997
TOP2A	205	0.00281	0.00633
HNF4A	206	0.00282	0.00347	0.00394	0.0153	0.951
SIX4	207	0.00285	0.0308
BIRA	208	0.00285	0.00438	0.00439	0.00477	0.0102
ATF4	209	0.00286	0.00423	0.00539	0.0933	0.114
AURKB	210	0.00291	0.978
SPNS1	211	0.00294	0.00364	0.0174	0.0314	0.98
FLI1	212	0.00297	0.0711	0.997	0.998	0.999
SRF	213	0.003	0.00347	0.00372	0.00417	0.0101
TOP2B	214	0.003	0.0106	0.0233
GLI3	215	0.003	0.00398
CHD1	216	0.003	1	1
EED	217	0.00304	0.00339	0.00346	0.00423	0.00677
BAZ1A	218	0.00304	0.0033	0.00378
USP16	219	0.00304	0.00344	0.989	0.993	1
CHD8	220	0.00304	0.00485	1	1
NLRP3	221	0.00304	0.00307
TBX20	222	0.00306
STAT6	223	0.00306	0.00307	0.0047	0.315	0.92
RXRG	224	0.00307	0.0241	0.0445	0.116	0.161
GFI1B	225	0.00308	0.917	0.998
ETS1	226	0.00309	0.098	0.999	1	1
ARID3A	227	0.00311	0.00703	0.0142	0.344
PHF20	228	0.00313	0.00412
Ubiquitin	229	0.00313	0.00346	0.00348	0.00365	0.00889
EOMES	230	0.00314
PER1	231	0.0032	0.00633	0.00674	0.0181	0.341
BAZ1B	232	0.00321
RAG1	233	0.00322	0.00434	0.0044	0.804	0.954
H2AFX	234	0.00325	0.00325	0.00339	0.00344	0.00344
NPAS2	235	0.00326	0.00442	0.0057	0.00612	0.0104
H3S28ph	236	0.00327	0.00356	0.0117	0.0122	0.996
SUV39H1	237	0.00329	0.00419
GTF2B	238	0.0033	0.0271	0.124	0.353	0.997
HOPX	239	0.00331	0.00345
ETV2	240	0.00332	0.0038	0.018	0.0432	0.0628
SFMBT1	241	0.00332	1
BRD2	242	0.00333	0.00346	0.00349	0.00438	0.999
CUX2	243	0.00333	0.0754
REL	244	0.00333	0.00398	0.00398	0.0122
HIRA	245	0.00335	0.00336	0.0197
RB1	246	0.00335	0.00422
SUV39H2	247	0.00337	0.00345
CDK9	248	0.00339	0.00343	0.00518	0.00521	0.45
MBD2	249	0.00341	0.00442	0.00525	0.0061	0.0106
NBN	250	0.00344	0.00458	0.00497	0.0118
MYOG	251	0.00344	0.00356	0.017	0.0339	0.0778
ELK1	252	0.00344	0.00412	0.00522	0.0798
ASCL2	253	0.00345	0.948
CLK1	254	0.00345	0.00677
WDR5	255	0.00345	0.0042	0.00421	0.975	0.991
NCOA1	256	0.00347	0.0064
AICDA	257	0.0035	0.0036	0.0861	0.858	1
POLR3G	258	0.00352	0.996
KLF4	259	0.00356	0.00412	0.00418	0.00442	0.00457
GSK3B	260	0.00357
KLF1	261	0.00358	0.00525	0.944	0.997
FOXA1	262	0.00359	0.00412	0.00441	0.00631	0.00668
ELK4	263	0.00359	0.00467	0.00506	0.00526
NFIC	264	0.00362	0.00693
EGR1	265	0.00366	0.00434	0.00629	0.139	0.826
DNMT3L	266	0.00367	0.00369
TAF1	267	0.0037	0.184	0.916
AHR	268	0.0037	0.00448	0.00455	0.00476
KLF3	269	0.00372	0.747	0.98
THRB	270	0.00374	0.00646	0.977	0.992
SIN3B	271	0.00375	0.00607	0.00907	0.0112	0.999
MBD4	272	0.0038	0.00451	0.00576	0.0107
YAP1	273	0.00386	0.225
MLLT3	274	0.00387	0.994	0.995
SMARCC2	275	0.00387	0.00414	0.00531	0.481
PRDM4	276	0.0039	0.00514	0.0104	0.0184
NCOR1	277	0.00392	0.00409	0.00499	0.00853	0.0403
PER2	278	0.00397	0.00627	0.0126	0.97	0.997
E2F1	279	0.00398	0.00631	0.00635	0.0099	0.996
CREB1	280	0.00398	0.0459	0.963	0.975	0.985
BRDU	281	0.00398	0.00531
OGT	282	0.00398	0.00669	0.994	0.999
NR1D2	283	0.00408	0.686	0.93	0.999
SMAD1/5	284	0.00409	0.00501	0.0895	0.106
LBR	285	0.0041
HEY2	286	0.00411
BRD3	287	0.00412	0.00448	0.00458	0.00515	0.00785
CTCFL	288	0.00412	0.00517	0.995
STAT5	289	0.00413	0.0132	0.0423	0.0463	0.0706
EP400	290	0.00413	0.00466	0.00532	0.934
CRY2	291	0.00414	0.017	0.919	0.926	0.991
ATF3	292	0.00416	0.0058	0.00611	0.00676	0.00735
PSMB1	293	0.00416	0.00462
PWP1	294	0.0042
HNRNPL	295	0.00421	0.00437
CRY1	296	0.00421	0.0129	0.998	0.999	1
PAXIP1	297	0.0043	0.125	0.983	1
RARG	298	0.00431	0.00744	0.01	0.016	0.038
TCF4	299	0.00431	0.0135	0.0476	0.981	0.986
SMAD2/3	300	0.00432	0.0116	0.367
RAD51	301	0.00433	0.00603	0.0166	0.0482	0.128
GM6871	302	0.00437
MAFF	303	0.00437	0.0195	0.083	0.75
KDM5B	304	0.00439	0.00441	0.219
EZH1	305	0.0044	0.0118	0.0142	0.0158	0.0174
TBP	306	0.00441	0.962	0.963	0.991	0.997
ETS2	307	0.00442	0.00452	0.0062	0.00857
BCL11A	308	0.00443
GATA3	309	0.00444	0.00603	0.00605	0.00619	0.0104
STAG1	310	0.00444	0.704	0.938	0.953	0.989
PRDM5	311	0.00448	0.0083	0.0369	1
AFF4	312	0.00454	0.102
MEF2D	313	0.00457	0.00648	0.00687	0.00732	0.00759
HOXA9	314	0.00458	0.0114	0.0657
PRDM9	315	0.00463	0.0725	0.238
GTF2F1	316	0.00469
RFX5	317	0.00479
MED12	318	0.00493	0.00806	0.936	0.989
TBX21	319	0.00503	0.00938	0.997	0.999
KAT2B	320	0.00504	0.00549	0.00626	0.171	1
PRDM14	321	0.00513	0.00781	0.18
ERG	322	0.00521	0.0412	0.665	0.999	0.999
UBTF	323	0.00525	0.969	0.997
RAD23B	324	0.00528	0.0165
REST	325	0.00532	0.00565	0.0073	0.00754	0.00967
FAIRE	326	0.00534	0.00914	0.764	0.782	1
BCL3	327	0.00536
DZIP3	328	0.00539
BRCA1	329	0.00546	0.0064	0.00677	0.00802	1
E4F1	330	0.00552
MYB	331	0.00565	0.00619	0.0106	0.024	0.0301
KDM5C	332	0.00573	0.00705
PPARA	333	0.00575	0.0112	0.0114	0.0122	0.163
NFYA	334	0.00575	0.0153	0.132	0.973	0.99
RORC	335	0.0058	0.00806	0.028	0.105	0.529
BRWD1	336	0.00588	0.0085
HIF1A	337	0.00592	0.00853	0.0109	0.0137	0.99
DMRT1	338	0.00597	0.0354
LUZP1	339	0.00604
TMPRSS4	340	0.00608	0.0262	0.0834	0.993	0.997
POLR3A	341	0.00611	0.00835	0.00851	0.0133	0.0251
GPS2	342	0.00631	0.507
KLF5	343	0.0064	0.00991	0.677
HSF2	344	0.00648	0.0137	0.458
CHD4	345	0.00654	0.00927	0.0136	0.032	0.033
NR1D1	346	0.00663	0.783	0.961	0.966	0.973
ZBTB17	347	0.00676	0.00737	0.0117	0.0386	0.972
ASH1L	348	0.00722	0.0136
MAF	349	0.00724	0.123	0.739	0.741	0.919
ELK3	350	0.00771	0.0186	0.089
NFE2	351	0.00793	0.0116	0.584	0.948	0.994
SATB2	352	0.00795
SUMO1	353	0.00808	0.131	0.236
RUVBL1	354	0.00821
RARA	355	0.00837	0.0998	0.705	0.771	0.856
POLR3GL	356	0.00846	0.0249	0.975	0.999
CEBPG	357	0.00848
PR	358	0.00865	0.841	0.924	0.93	0.936
AFF3	359	0.00878
NR2F2	360	0.00907
ZIC3	361	0.00911
ZMIZ1	362	0.0093	0.928	1	1
NR5A2	363	0.00945	0.915
EHF	364	0.00961
PHOX2A	365	0.00966
SOX17	366	0.0101	0.0219	0.0286	0.0971	0.596
KDM3A	367	0.0105	0.94
ELL2	368	0.0112	0.234
TET2	369	0.012	0.988
ELF5	370	0.012	0.0174
HDAC2	371	0.0121	0.0648	0.971
DAXX	372	0.0122	0.0244	0.0331	0.0442	0.0896
PKNOX1 | PKNOX2	373	0.0124
KLF15	374	0.0124	1
MAFA	375	0.0124
CHD7	376	0.0125
VDR	377	0.0149	0.0426	0.135	0.222	0.986
PITX1	378	0.015	0.177
SMCHD1	379	0.0151
PTF1A	380	0.0151	0.0273	0.0379	0.0561	0.0835
TAF3	381	0.0156	0.401	0.899
CTR9	382	0.016	0.993	0.995
TRIM63	383	0.0169	0.0326	0.589	0.932
JUND	384	0.0186	0.0256	0.337	0.624	0.998
GTF2A1	385	0.0224
RAP1A	386	0.0228	0.0303	0.216	0.998
IRF1	387	0.0232	0.0798	0.125	0.303	0.382
SS18	388	0.0233
RFX2	389	0.0241	0.111
TFE3	390	0.0275	0.389	0.583
CBX3	391	0.0313	1
H3F3B	392	0.0339	0.0356	0.722
NUP98Â–PHF23	393	0.0358
NFATC1	394	0.0377	0.0521	0.0696
TEC	395	0.0382	0.725	0.885	0.989
TGIF1	396	0.0387	0.0773	0.812	0.989	0.996
INSM1	397	0.0396
PAX3	398	0.0397
RCOR1	399	0.0407	1	1
OVOL2	400	0.0407
ELL3	401	0.041
ATF7	402	0.0465
DPY30	403	0.0496
NR0B1	404	0.0501	0.374
SIX2	405	0.0505	0.806
MSL1	406	0.0527	0.903	0.999
NKX3-2	407	0.0528	0.478
USF1	408	0.0545	0.999	0.999	1
ZIC2	409	0.0552	0.0617
HOXB4	410	0.0553	0.924	0.982
FGFR1	411	0.0558	0.288	0.952
NKX2-5	412	0.0574	0.301
BATF3	413	0.058	0.512
LYL1	414	0.0634
MYBL1	415	0.0663
E2F4	416	0.0696	0.668	0.883	0.978	0.998
CRX	417	0.0698	0.129	0.573	0.701
TBX5	418	0.0715
TAF7L	419	0.0769	0.367	0.993
TEAD2	420	0.0772	0.967
RFX6	421	0.0807
CXXC1	422	0.0917	1
ZNF384	423	0.0948	0.939	1
SP1	424	0.104	0.934	1
TAF9B	425	0.109
PKNOX1	426	0.111
TFAP2A	427	0.117	0.146	0.321	0.749	0.975
THRA	428	0.122
RFX3	429	0.146
RFX1	430	0.154
PRDM16	431	0.155	0.791	0.799	0.952	0.993
GFI1	432	0.16	0.668	0.893
NKX2-1	433	0.165	0.334
NUCKS1	434	0.169
GRHL2	435	0.185
ONECUT1	436	0.196	0.351	0.449	0.475	0.515
CAPG	437	0.209	1
ERCC3	438	0.242
KCR	439	0.246	0.991	1
KDM4B	440	0.259
FOSL2	441	0.313	0.482	0.722	0.915	0.945
NKX6-1	442	0.346
SUPT5H	443	0.374	0.624	1	1	1
KAT8	444	0.378	0.676	0.999	1
TGIF2	445	0.393
ZNF322A	446	0.397
RUNX2	447	0.42	0.721	0.864	0.985	0.991
MSX1	448	0.435
MSL2	449	0.497	0.817
DMRTB1	450	0.5
LMO2	451	0.51	0.677
TFCP2	452	0.532
H1F0	453	0.532
PHC1	454	0.542	0.923
HRAS	455	0.581	0.908	0.964	0.969	0.99
MCRS1	456	0.599	0.94
TLE	457	0.607
STAG2	458	0.643	0.883	0.996	1
ESRRA	459	0.647
NIPBL	460	0.657	0.886	0.998
MTA2	461	0.696
MAFK	462	0.696	1	1	1
KANSL3	463	0.701	0.967
NR6A1	464	0.714	0.908
SOX10	465	0.731	0.883
NFIB	466	0.774	0.94
ETV6	467	0.779	1	1
ERF	468	0.798	0.984
CSTF3	469	0.805
NFIL3	470	0.812
HCFC1	471	0.82	1	1	1
RBPJL	472	0.828	0.988
BACH2	473	0.842
SOX4	474	0.874
IKZF3	475	0.876	1
MTOR	476	0.893
IRF3	477	0.911	0.976
MZF1	478	0.916	0.989	0.997
STAT4	479	0.926	0.999	1
NFYC	480	0.935
ATF7IP	481	0.937
REPIN1	482	0.958
SRC	483	0.959	0.969	0.992	0.996
PPARGC1A	484	0.961	1
NELFA	485	0.962
ATF2	486	0.964	0.971
GLI1	487	0.971
POLR2B	488	0.973	0.983	0.984	0.989	0.989
SPIB	489	0.975	0.988
CDK8	490	0.977	0.994
ZNF143	491	0.98	0.999	1
BHLHE40	492	0.984	1
MXI1	493	0.985	1	1	1
NFYB	494	0.99
SUMO2	495	0.991	0.998	0.998
RORA	496	0.992	0.999
HEXIM1	497	0.992
TBX19	498	0.992
HNF1B	499	0.993	1
USF2	500	0.994	1	1
NR0B2	501	0.994	1
MYF5	502	0.995
SATB1	503	0.996
ZKSCAN1	504	0.996	1
GRIP1	505	0.996	0.999
ZFPM1	506	0.998
PARP14	507	0.998	1	1	1
SMAD4	508	0.998
CDK7	509	0.998
GTF2E2	510	0.998	1	1
ZFX	511	0.998
THAP11	512	0.998
ELL	513	0.998
TNFSF11	514	0.999	1
CBX8	515	0.999	1	1
AUTS2	516	0.999
INO80	517	0.999
NCAPD3	518	0.999	1
CHD2	519	1	1
ASH2L	520	1	1
JMJD6	521	1
NELFB	522	1
IKZF2	523	1
MYCN	524	1
MAX	525	1	1	1
POU2F1	526	1
ZC3H11A	527	1	1	1
FOXK1	528	1
KAT5	529	1
MITF	530	1
NFE2L2	531	1	1
NELFE	532	1	1
MAZ	533	1	1
ELF1	534	1	1
GABPA	535	1
NSL1	536	1

## Sheet: Red_Ex neuron bnet
from.x	to.x	strength.x	direction.x	degree.out	condcat	uninode	uninode	edgename
2610037D02Rik	Pibf1	0.870967741935484	0.596774193548387	1	wtNA	NA	NA	2610037D02Rik Pibf1
4930578G10Rik	Gm10600	0.935483870967742	1	2	wtNA	NA	wt	4930578G10Rik Gm10600
4930578G10Rik	Gm12394	1	1	2	wthd	NA	NA	4930578G10Rik Gm12394
6530403H02Rik	Asap1	0.883064516129032	1	3	wthd	NA	NA	6530403H02Rik Asap1
6530403H02Rik	Chst9	0.887096774193548	1	4	NAhd	NA	NA	6530403H02Rik Chst9
6530403H02Rik	Dpyd	1	0.987903225806452	4	NAhd	NA	NA	6530403H02Rik Dpyd
6530403H02Rik	Ly6h	0.895161290322581	0.983870967741935	3	wtNA	NA	wt	6530403H02Rik Ly6h
6530403H02Rik	Snhg11	0.991935483870968	0.955645161290323	3	wthd	NA	NA	6530403H02Rik Snhg11
A330008L17Rik	Cdh8	1	0.983870967741935	1	wtNA	NA	NA	A330008L17Rik Cdh8
Adgrl2	Gm30382	1	0.620967741935484	1	NAhd	NA	NA	Adgrl2 Gm30382
Agbl4	Dscam	0.939516129032258	0.512096774193548	1	wtNA	NA	NA	Agbl4 Dscam
Arhgap26	Fgf1	1	1	1	wthd	NA	NA	Arhgap26 Fgf1
Asic2	Gm11418	1	1	1	wthd	NA	NA	Asic2 Gm11418
Astn2	Brinp3	1	0.713709677419355	3	wtNA	NA	NA	Astn2 Brinp3
Astn2	Grm1	0.915322580645161	0.995967741935484	3	wtNA	NA	wt	Astn2 Grm1
Astn2	Snhg11	0.870967741935484	0.823924731182796	3	wtNA	NA	NA	Astn2 Snhg11
Auts2	Cadm2	0.959677419354839	1	2	wtNA	NA	NA	Auts2 Cadm2
Auts2	Gm42439	1	1	2	wtNA	NA	NA	Auts2 Gm42439
Bcl11b	Ano4	1	1	4	NAhd	NA	hd	Bcl11b Ano4
Bcl11b	Car10	0.943548387096774	0.744623655913978	4	NAhd	NA	NA	Bcl11b Car10
Bcl11b	Cpne9	0.895161290322581	1	4	wthd	NA	NA	Bcl11b Cpne9
Bcl11b	Epha7	0.862903225806452	1	4	wtNA	NA	NA	Bcl11b Epha7
Bcl11b	Rims3	0.991935483870968	1	4	wthd	NA	NA	Bcl11b Rims3
Bcl11b	Rnf144a	0.943548387096774	1	4	wtNA	NA	wt	Bcl11b Rnf144a
Brinp3	Gm15584	1	1	1	wthd	NA	NA	Brinp3 Gm15584
Cacna1a	Gfra1	1	1	8	NAhd	NA	NA	Cacna1a Gfra1
Cacna1a	Gnb4	1	1	8	NAhd	NA	NA	Cacna1a Gnb4
Cacna1a	Ntng2	0.983870967741935	0.939516129032258	1	wthd	NA	NA	Cacna1a Ntng2
Cacna1a	Oprk1	0.923387096774194	1	8	NAhd	NA	NA	Cacna1a Oprk1
Cacna1a	Rgs12	0.987903225806452	1	8	NAhd	NA	hd	Cacna1a Rgs12
Cacna1a	Rgs7	0.870967741935484	0.860215053763441	8	NAhd	NA	NA	Cacna1a Rgs7
Cacna1a	Synpr	0.987903225806452	1	8	NAhd	NA	hd	Cacna1a Synpr
Cacna1a	Tmem163	0.931451612903226	0.979838709677419	8	NAhd	NA	NA	Cacna1a Tmem163
Cacna2d3	2010111I01Rik	0.995967741935484	1	11	wtNA	NA	NA	Cacna2d3 2010111I01Rik
Cacna2d3	Cacna1d	0.975806451612903	1	11	wtNA	NA	wt	Cacna2d3 Cacna1d
Cacna2d3	Epha4	0.858870967741935	1	11	wtNA	NA	wt	Cacna2d3 Epha4
Cacna2d3	Lrtm1	1	1	11	wthd	NA	NA	Cacna2d3 Lrtm1
Cacna2d3	Me3	0.967741935483871	1	11	wtNA	NA	wt	Cacna2d3 Me3
Cacna2d3	Ncald	1	1	11	wtNA	NA	wt	Cacna2d3 Ncald
Cacna2d3	Npas2	0.899193548387097	1	11	wtNA	NA	wt	Cacna2d3 Npas2
Cacna2d3	Plcxd3	0.995967741935484	1	11	wthd	NA	NA	Cacna2d3 Plcxd3
Cacna2d3	Sgcz	0.875	1	11	wtNA	NA	NA	Cacna2d3 Sgcz
Cacna2d3	Sntg1	1	1	11	wtNA	NA	wt	Cacna2d3 Sntg1
Cacna2d3	Sorcs1	0.935483870967742	1	11	wtNA	NA	NA	Cacna2d3 Sorcs1
Cadm1	Rnf121	1	1	1	wtNA	NA	NA	Cadm1 Rnf121
Cadps2	Shisa6	0.903225806451613	1	1	wtNA	NA	NA	Cadps2 Shisa6
Caln1	Cacna1e	0.911290322580645	0.995967741935484	1	wtNA	NA	NA	Caln1 Cacna1e
Camk2d	6530403H02Rik	0.983870967741935	0.604838709677419	2	NAhd	NA	NA	Camk2d 6530403H02Rik
Camk2d	Epha3	0.911290322580645	1	2	NAhd	NA	hd	Camk2d Epha3
Car10	Afap1l1	0.943548387096774	1	8	wtNA	NA	wt	Car10 Afap1l1
Car10	Ankrd33b	0.94758064516129	1	8	wtNA	NA	NA	Car10 Ankrd33b
Car10	Arhgap15	0.891129032258065	1	8	wthd	NA	NA	Car10 Arhgap15
Car10	Grid1	0.935483870967742	1	8	wtNA	NA	NA	Car10 Grid1
Car10	Grin2a	0.943548387096774	1	4	NAhd	NA	hd	Car10 Grin2a
Car10	Ptprk	0.935483870967742	1	8	wthd	NA	NA	Car10 Ptprk
Car10	Ryr3	1	0.995967741935484	8	wthd	NA	NA	Car10 Ryr3
Car10	Sorcs2	0.899193548387097	0.779569892473118	8	wtNA	NA	NA	Car10 Sorcs2
Car10	Zbtb7c	0.959677419354839	1	8	wtNA	NA	wt	Car10 Zbtb7c
Cdh12	Kcnq5	0.94758064516129	0.991935483870968	3	wtNA	NA	NA	Cdh12 Kcnq5
Cdh12	Pde8b	0.870967741935484	1	3	wtNA	NA	NA	Cdh12 Pde8b
Cdh12	Ryr3	0.923387096774194	0.991935483870968	3	wtNA	NA	NA	Cdh12 Ryr3
Cdh13	6530403H02Rik	0.979838709677419	0.873655913978495	2	NAhd	NA	NA	Cdh13 6530403H02Rik
Cdh13	9530026P05Rik	0.995967741935484	1	8	wthd	NA	NA	Cdh13 9530026P05Rik
Cdh13	Caln1	0.850806451612903	0.799731182795699	8	wtNA	NA	NA	Cdh13 Caln1
Cdh13	Chst9	0.939516129032258	1	8	wtNA	NA	NA	Cdh13 Chst9
Cdh13	Col23a1	0.983870967741935	1	8	wtNA	NA	wt	Cdh13 Col23a1
Cdh13	Dpyd	0.991935483870968	0.911290322580645	8	wtNA	NA	NA	Cdh13 Dpyd
Cdh13	Nckap5	0.991935483870968	1	8	wtNA	NA	wt	Cdh13 Nckap5
Cdh13	Plcb1	0.979838709677419	1	8	wtNA	NA	wt	Cdh13 Plcb1
Cdh13	Prss12	0.915322580645161	1	8	wtNA	NA	wt	Cdh13 Prss12
Cdh18	Ajap1	0.883064516129032	0.997983870967742	11	wtNA	NA	wt	Cdh18 Ajap1
Cdh18	Cdk14	1	1	11	wtNA	NA	wt	Cdh18 Cdk14
Cdh18	Etl4	0.858870967741935	0.52755376344086	11	wtNA	NA	NA	Cdh18 Etl4
Cdh18	Fam19a1	0.943548387096774	0.593413978494624	11	wtNA	NA	NA	Cdh18 Fam19a1
Cdh18	Frmpd4	0.94758064516129	0.90994623655914	11	wtNA	NA	NA	Cdh18 Frmpd4
Cdh18	Gas7	0.907258064516129	0.86491935483871	11	wtNA	NA	wt	Cdh18 Gas7
Cdh18	Hs3st4	1	0.808467741935484	11	wthd	NA	NA	Cdh18 Hs3st4
Cdh18	Lpgat1	0.987903225806452	0.995967741935484	11	wtNA	NA	wt	Cdh18 Lpgat1
Cdh18	Nwd2	0.995967741935484	1	11	wtNA	NA	wt	Cdh18 Nwd2
Cdh18	Pitpnc1	0.983870967741935	0.879032258064516	11	wtNA	NA	NA	Cdh18 Pitpnc1
Cdh18	Slit2	0.971774193548387	0.997983870967742	11	wtNA	NA	wt	Cdh18 Slit2
Cdh8	A330008L17Rik	1	1	1	NAhd	NA	NA	Cdh8 A330008L17Rik
Chrm3	Rgs6	0.971774193548387	0.690188172043011	2	wtNA	wt	NA	Chrm3 Rgs6
Chrm3	Sgcd	1	1	2	wtNA	wt	NA	Chrm3 Sgcd
Clstn2	4921534H16Rik	1	1	1	wthd	NA	NA	Clstn2 4921534H16Rik
Cntn3	Gm44188	1	1	1	wthd	NA	NA	Cntn3 Gm44188
Cntn4	Cntn6	1	0.717741935483871	1	wtNA	NA	NA	Cntn4 Cntn6
Cntn5	Cadps2	0.959677419354839	0.938172043010753	3	wtNA	NA	NA	Cntn5 Cadps2
Cntn5	Robo2	1	1	3	wtNA	NA	NA	Cntn5 Robo2
Cntn5	Thsd7a	0.939516129032258	0.940860215053763	3	wtNA	NA	NA	Cntn5 Thsd7a
Cntn6	Cntn4	1	1	1	NAhd	NA	NA	Cntn6 Cntn4
Cntnap5a	Kirrel3	1	1	1	wthd	NA	NA	Cntnap5a Kirrel3
Cntnap5a	Smoc2	0.935483870967742	1	2	NAhd	NA	NA	Cntnap5a Smoc2
Col19a1	Enpp2	0.895161290322581	0.89247311827957	1	wtNA	wt	NA	Col19a1 Enpp2
Cpne5	Ranbp17	0.870967741935484	0.708333333333333	1	wtNA	NA	NA	Cpne5 Ranbp17
Csmd1	Dlgap1	0.987903225806452	0.737903225806452	1	NAhd	hd	hd	Csmd1 Dlgap1
Csmd3	Grid2	0.931451612903226	0.971102150537634	1	wtNA	NA	NA	Csmd3 Grid2
Ctnna3	Lhfp	0.866935483870968	1	2	wtNA	NA	NA	Ctnna3 Lhfp
Ctnna3	Lrrtm3	1	0.98991935483871	2	wthd	NA	NA	Ctnna3 Lrrtm3
Cux1	Cux2	0.995967741935484	0.834005376344086	1	wtNA	NA	NA	Cux1 Cux2
Cux2	A830018L16Rik	0.935483870967742	0.991935483870968	13	wtNA	NA	NA	Cux2 A830018L16Rik
Cux2	BC030499	1	1	13	wtNA	NA	wt	Cux2 BC030499
Cux2	Bcl11b	1	0.98991935483871	13	wtNA	NA	NA	Cux2 Bcl11b
Cux2	Calb1	0.850806451612903	1	13	wtNA	NA	NA	Cux2 Calb1
Cux2	Car4	0.899193548387097	1	13	wtNA	NA	wt	Cux2 Car4
Cux2	Gsg1l	0.967741935483871	1	13	wtNA	NA	NA	Cux2 Gsg1l
Cux2	Pam	0.907258064516129	0.994623655913978	13	wtNA	NA	wt	Cux2 Pam
Cux2	Pde7b	0.907258064516129	1	13	wtNA	NA	wt	Cux2 Pde7b
Cux2	Rasgrf2	1	1	13	wtNA	NA	NA	Cux2 Rasgrf2
Cux2	Sema3e	0.971774193548387	1	13	wtNA	NA	NA	Cux2 Sema3e
Cux2	Slc35f1	0.967741935483871	0.985887096774194	13	wtNA	NA	NA	Cux2 Slc35f1
Cux2	Smoc2	0.854838709677419	1	13	wtNA	NA	NA	Cux2 Smoc2
Cux2	Stxbp6	0.919354838709677	1	13	wtNA	NA	NA	Cux2 Stxbp6
D430041D05Rik	Gm13883	1	1	1	wtNA	wt	wt	D430041D05Rik Gm13883
Dab1	5730522E02Rik	0.995967741935484	1	2	wthd	NA	NA	Dab1 5730522E02Rik
Dab1	Cadps2	0.935483870967742	0.829301075268817	3	NAhd	NA	NA	Dab1 Cadps2
Dab1	Chrm2	0.975806451612903	1	3	NAhd	NA	hd	Dab1 Chrm2
Dab1	Htr2a	0.995967741935484	1	2	wtNA	NA	wt	Dab1 Htr2a
Dgkb	2010300C02Rik	0.959677419354839	1	12	wtNA	NA	NA	Dgkb 2010300C02Rik
Dgkb	Arpp21	0.850806451612903	1	12	wtNA	NA	NA	Dgkb Arpp21
Dgkb	Asap1	0.983870967741935	1	12	wtNA	NA	NA	Dgkb Asap1
Dgkb	Enox1	0.979838709677419	0.995967741935484	12	wtNA	NA	wt	Dgkb Enox1
Dgkb	Gm2163	1	1	12	wtNA	NA	NA	Dgkb Gm2163
Dgkb	Gria1	0.943548387096774	1	12	wtNA	NA	NA	Dgkb Gria1
Dgkb	Kirrel3	0.915322580645161	0.795698924731183	12	wtNA	NA	NA	Dgkb Kirrel3
Dgkb	Map3k5	0.92741935483871	0.997983870967742	12	wtNA	NA	wt	Dgkb Map3k5
Dgkb	Sel1l3	0.879032258064516	0.995967741935484	12	wtNA	NA	NA	Dgkb Sel1l3
Dgkb	Trhde	0.919354838709677	1	12	wtNA	NA	NA	Dgkb Trhde
Dgkb	Tshz3	0.995967741935484	1	12	wtNA	NA	wt	Dgkb Tshz3
Dgkb	Zmat4	0.979838709677419	0.863575268817204	12	wtNA	NA	NA	Dgkb Zmat4
Dgkg	Nnat	0.943548387096774	1	1	wtNA	NA	wt	Dgkg Nnat
Dgkg	St6galnac5	0.899193548387097	0.987903225806452	1	NAhd	NA	NA	Dgkg St6galnac5
Dlg2	Anks1b	0.907258064516129	0.970430107526882	1	wtNA	NA	wt	Dlg2 Anks1b
Dner	Enox1	0.911290322580645	0.635752688172043	3	wtNA	NA	wt	Dner Enox1
Dner	Pid1	1	0.971774193548387	3	wtNA	NA	NA	Dner Pid1
Dner	Ptprz1	0.875	0.700268817204301	3	wtNA	NA	NA	Dner Ptprz1
Dpyd	6530403H02Rik	1	0.997983870967742	10	wtNA	NA	NA	Dpyd 6530403H02Rik
Dpyd	Atp2b2	1	1	10	wtNA	NA	wt	Dpyd Atp2b2
Dpyd	Cacnb4	0.979838709677419	1	10	wtNA	NA	NA	Dpyd Cacnb4
Dpyd	Camk2d	0.987903225806452	1	10	wtNA	NA	NA	Dpyd Camk2d
Dpyd	Cdh4	0.891129032258065	1	10	wtNA	NA	wt	Dpyd Cdh4
Dpyd	Fstl5	1	1	10	wtNA	NA	wt	Dpyd Fstl5
Dpyd	Kalrn	0.995967741935484	0.995967741935484	10	wtNA	NA	wt	Dpyd Kalrn
Dpyd	Kcnd3	0.915322580645161	0.993279569892473	10	wtNA	NA	NA	Dpyd Kcnd3
Dpyd	Nkain3	0.987903225806452	1	10	wtNA	NA	NA	Dpyd Nkain3
Dpyd	Phactr1	0.955645161290323	0.995967741935484	2	NAhd	NA	NA	Dpyd Phactr1
Dpyd	Ptpro	0.939516129032258	1	10	wtNA	NA	wt	Dpyd Ptpro
Dpyd	Satb1	0.983870967741935	1	2	NAhd	NA	hd	Dpyd Satb1
Dscaml1	Gria4	0.991935483870968	1	2	wtNA	NA	NA	Dscaml1 Gria4
Dscaml1	Prkcg	0.991935483870968	1	2	wtNA	NA	NA	Dscaml1 Prkcg
Epb41	Rgs20	0.858870967741935	0.89247311827957	1	NAhd	NA	NA	Epb41 Rgs20
Epha6	Csmd2	0.991935483870968	1	2	NAhd	NA	hd	Epha6 Csmd2
Epha6	Dab1	1	0.975806451612903	4	wtNA	NA	NA	Epha6 Dab1
Epha6	Dpp6	0.971774193548387	1	2	NAhd	NA	NA	Epha6 Dpp6
Epha6	Efna5	0.854838709677419	0.946236559139785	4	wtNA	NA	wt	Epha6 Efna5
Epha6	Robo1	0.991935483870968	1	4	wtNA	NA	NA	Epha6 Robo1
Epha6	Tiam1	0.971774193548387	1	4	wtNA	NA	wt	Epha6 Tiam1
Ephb1	Kcnn2	0.854838709677419	1	1	NAhd	NA	NA	Ephb1 Kcnn2
Erbb4	2010111I01Rik	0.92741935483871	1	161	NAhd	NA	NA	Erbb4 2010111I01Rik
Erbb4	2010300C02Rik	1	1	161	NAhd	NA	NA	Erbb4 2010300C02Rik
Erbb4	2610037D02Rik	0.903225806451613	1	161	NAhd	NA	NA	Erbb4 2610037D02Rik
Erbb4	5330434G04Rik	1	1	161	NAhd	NA	NA	Erbb4 5330434G04Rik
Erbb4	9630028H03Rik	0.955645161290323	1	161	NAhd	NA	hd	Erbb4 9630028H03Rik
Erbb4	A330102I10Rik	0.935483870967742	1	161	NAhd	NA	hd	Erbb4 A330102I10Rik
Erbb4	A930011G23Rik	0.939516129032258	1	161	NAhd	NA	NA	Erbb4 A930011G23Rik
Erbb4	Abhd2	0.903225806451613	1	161	NAhd	NA	NA	Erbb4 Abhd2
Erbb4	Acyp2	0.987903225806452	1	161	NAhd	NA	NA	Erbb4 Acyp2
Erbb4	Adam23	0.983870967741935	1	161	NAhd	NA	NA	Erbb4 Adam23
Erbb4	Adarb2	0.850806451612903	0.991935483870968	2	wtNA	NA	wt	Erbb4 Adarb2
Erbb4	Adgrb1	0.879032258064516	1	161	NAhd	NA	NA	Erbb4 Adgrb1
Erbb4	Ankrd33b	0.931451612903226	1	161	NAhd	NA	NA	Erbb4 Ankrd33b
Erbb4	Apba1	0.995967741935484	0.997983870967742	161	NAhd	NA	hd	Erbb4 Apba1
Erbb4	Arnt2	0.94758064516129	1	161	NAhd	NA	NA	Erbb4 Arnt2
Erbb4	Atp1a3	0.991935483870968	1	161	NAhd	NA	hd	Erbb4 Atp1a3
Erbb4	Baiap2	0.899193548387097	1	161	NAhd	NA	hd	Erbb4 Baiap2
Erbb4	Brinp3	0.951612903225806	1	161	NAhd	NA	NA	Erbb4 Brinp3
Erbb4	Btbd1	0.850806451612903	1	161	NAhd	NA	hd	Erbb4 Btbd1
Erbb4	Camkv	0.915322580645161	1	161	NAhd	NA	hd	Erbb4 Camkv
Erbb4	Cdc42	0.915322580645161	1	161	NAhd	NA	NA	Erbb4 Cdc42
Erbb4	Chuk	0.850806451612903	0.997983870967742	161	NAhd	NA	NA	Erbb4 Chuk
Erbb4	Ckb	0.975806451612903	1	161	NAhd	NA	hd	Erbb4 Ckb
Erbb4	Cntn6	0.939516129032258	1	161	NAhd	NA	NA	Erbb4 Cntn6
Erbb4	Cntnap5c	0.995967741935484	0.997983870967742	161	NAhd	NA	hd	Erbb4 Cntnap5c
Erbb4	Cog5	0.923387096774194	1	161	NAhd	NA	NA	Erbb4 Cog5
Erbb4	Cpe	0.915322580645161	1	161	NAhd	NA	hd	Erbb4 Cpe
Erbb4	Cpne5	0.971774193548387	1	161	NAhd	NA	NA	Erbb4 Cpne5
Erbb4	Cstf3	0.915322580645161	1	161	NAhd	NA	NA	Erbb4 Cstf3
Erbb4	Cul5	0.903225806451613	1	161	NAhd	NA	hd	Erbb4 Cul5
Erbb4	Dclk2	0.967741935483871	1	161	NAhd	NA	NA	Erbb4 Dclk2
Erbb4	Ddx5	0.987903225806452	1	161	NAhd	NA	NA	Erbb4 Ddx5
Erbb4	Dgkz	0.903225806451613	1	161	NAhd	NA	hd	Erbb4 Dgkz
Erbb4	Dner	0.967741935483871	1	161	NAhd	NA	NA	Erbb4 Dner
Erbb4	Dpp6	0.995967741935484	1	161	NAhd	NA	NA	Erbb4 Dpp6
Erbb4	Enah	0.995967741935484	1	161	NAhd	NA	hd	Erbb4 Enah
Erbb4	Fam193a	0.943548387096774	1	161	NAhd	NA	NA	Erbb4 Fam193a
Erbb4	Fam212b	0.911290322580645	1	161	NAhd	NA	hd	Erbb4 Fam212b
Erbb4	Fbxo36	0.875	1	161	NAhd	NA	hd	Erbb4 Fbxo36
Erbb4	Fgf13	0.971774193548387	1	161	NAhd	NA	hd	Erbb4 Fgf13
Erbb4	Frmd4b	0.995967741935484	1	161	NAhd	NA	NA	Erbb4 Frmd4b
Erbb4	Frmd6	0.987903225806452	1	161	NAhd	NA	hd	Erbb4 Frmd6
Erbb4	Fth1	0.983870967741935	1	161	NAhd	NA	hd	Erbb4 Fth1
Erbb4	Gab2	0.979838709677419	1	161	NAhd	NA	NA	Erbb4 Gab2
Erbb4	Gabbr2	0.951612903225806	1	161	NAhd	NA	NA	Erbb4 Gabbr2
Erbb4	Gap43	0.939516129032258	1	161	NAhd	NA	hd	Erbb4 Gap43
Erbb4	Gm11418	0.862903225806452	1	161	NAhd	NA	NA	Erbb4 Gm11418
Erbb4	Gm21092	0.883064516129032	0.997983870967742	161	NAhd	NA	hd	Erbb4 Gm21092
Erbb4	Gm26691	0.987903225806452	1	161	NAhd	NA	NA	Erbb4 Gm26691
Erbb4	Gm28376	0.991935483870968	1	161	NAhd	NA	NA	Erbb4 Gm28376
Erbb4	Gm30382	1	1	161	NAhd	NA	NA	Erbb4 Gm30382
Erbb4	Gm42418	0.991935483870968	1	161	NAhd	NA	NA	Erbb4 Gm42418
Erbb4	Gm42439	0.955645161290323	1	161	NAhd	NA	NA	Erbb4 Gm42439
Erbb4	Gnal	1	1	161	NAhd	NA	hd	Erbb4 Gnal
Erbb4	Gng7	0.995967741935484	1	161	NAhd	NA	NA	Erbb4 Gng7
Erbb4	Gpi1	1	1	161	NAhd	NA	NA	Erbb4 Gpi1
Erbb4	Grip1	0.995967741935484	1	161	NAhd	NA	NA	Erbb4 Grip1
Erbb4	Hlf	1	1	161	NAhd	NA	hd	Erbb4 Hlf
Erbb4	Hspa8	0.995967741935484	1	161	NAhd	NA	hd	Erbb4 Hspa8
Erbb4	Igsf11	0.983870967741935	1	161	NAhd	NA	NA	Erbb4 Igsf11
Erbb4	Kcnd3	0.943548387096774	1	161	NAhd	NA	NA	Erbb4 Kcnd3
Erbb4	Kcnh1	0.862903225806452	1	161	NAhd	NA	hd	Erbb4 Kcnh1
Erbb4	Kcnip3	0.866935483870968	1	161	NAhd	NA	hd	Erbb4 Kcnip3
Erbb4	Kcnj9	0.891129032258065	0.997983870967742	161	NAhd	NA	hd	Erbb4 Kcnj9
Erbb4	Khdrbs2	0.967741935483871	1	161	NAhd	NA	hd	Erbb4 Khdrbs2
Erbb4	Lmo7	0.979838709677419	1	161	NAhd	NA	NA	Erbb4 Lmo7
Erbb4	Lrch3	0.915322580645161	1	161	NAhd	NA	NA	Erbb4 Lrch3
Erbb4	Maml3	0.995967741935484	1	161	NAhd	NA	NA	Erbb4 Maml3
Erbb4	Mdm4	0.919354838709677	1	161	NAhd	NA	NA	Erbb4 Mdm4
Erbb4	Meg3	1	1	161	NAhd	NA	NA	Erbb4 Meg3
Erbb4	Miat	1	1	161	NAhd	NA	NA	Erbb4 Miat
Erbb4	Mpped2	0.899193548387097	1	161	NAhd	NA	hd	Erbb4 Mpped2
Erbb4	Msi2	0.931451612903226	1	161	NAhd	NA	hd	Erbb4 Msi2
Erbb4	Myrip	0.979838709677419	1	161	NAhd	NA	NA	Erbb4 Myrip
Erbb4	Nalcn	0.911290322580645	1	161	NAhd	NA	hd	Erbb4 Nalcn
Erbb4	Necab3	0.92741935483871	1	161	NAhd	NA	NA	Erbb4 Necab3
Erbb4	Neurod2	0.915322580645161	1	161	NAhd	NA	hd	Erbb4 Neurod2
Erbb4	Nfasc	0.866935483870968	1	161	NAhd	NA	hd	Erbb4 Nfasc
Erbb4	Nfia	0.979838709677419	1	161	NAhd	NA	NA	Erbb4 Nfia
Erbb4	Nfix	0.975806451612903	1	161	NAhd	NA	hd	Erbb4 Nfix
Erbb4	Nol4	0.963709677419355	1	161	NAhd	NA	hd	Erbb4 Nol4
Erbb4	Npepps	0.858870967741935	1	161	NAhd	NA	NA	Erbb4 Npepps
Erbb4	Nrf1	0.991935483870968	1	161	NAhd	NA	hd	Erbb4 Nrf1
Erbb4	Nrg3os	1	1	161	NAhd	NA	NA	Erbb4 Nrg3os
Erbb4	Nrgn	0.995967741935484	1	161	NAhd	NA	hd	Erbb4 Nrgn
Erbb4	Nuak1	0.862903225806452	1	161	NAhd	NA	hd	Erbb4 Nuak1
Erbb4	P2ry14	0.951612903225806	1	161	NAhd	NA	hd	Erbb4 P2ry14
Erbb4	Pak7	0.883064516129032	1	161	NAhd	NA	NA	Erbb4 Pak7
Erbb4	Park2	0.907258064516129	1	161	NAhd	NA	NA	Erbb4 Park2
Erbb4	Paxbp1	0.858870967741935	1	161	NAhd	NA	NA	Erbb4 Paxbp1
Erbb4	Pbx3	1	1	2	wthd	NA	NA	Erbb4 Pbx3
Erbb4	Pcsk2os2	0.862903225806452	1	161	NAhd	NA	NA	Erbb4 Pcsk2os2
Erbb4	Pibf1	0.883064516129032	0.997983870967742	161	NAhd	NA	NA	Erbb4 Pibf1
Erbb4	Pitpnc1	0.975806451612903	1	161	NAhd	NA	NA	Erbb4 Pitpnc1
Erbb4	Pkig	0.919354838709677	1	161	NAhd	NA	NA	Erbb4 Pkig
Erbb4	Plekhg5	0.919354838709677	1	161	NAhd	NA	NA	Erbb4 Plekhg5
Erbb4	Plppr1	0.879032258064516	1	161	NAhd	NA	hd	Erbb4 Plppr1
Erbb4	Plppr4	0.943548387096774	1	161	NAhd	NA	NA	Erbb4 Plppr4
Erbb4	Pnisr	0.955645161290323	1	161	NAhd	NA	NA	Erbb4 Pnisr
Erbb4	Polb	0.915322580645161	1	161	NAhd	NA	NA	Erbb4 Polb
Erbb4	Ppp1r16b	0.975806451612903	1	161	NAhd	NA	NA	Erbb4 Ppp1r16b
Erbb4	Ptchd4	0.854838709677419	1	161	NAhd	NA	hd	Erbb4 Ptchd4
Erbb4	Ptn	0.858870967741935	1	161	NAhd	NA	hd	Erbb4 Ptn
Erbb4	Ptpn5	0.963709677419355	1	161	NAhd	NA	hd	Erbb4 Ptpn5
Erbb4	Ptprd	0.891129032258065	0.948924731182796	161	NAhd	NA	NA	Erbb4 Ptprd
Erbb4	Ptprr	0.983870967741935	1	161	NAhd	NA	NA	Erbb4 Ptprr
Erbb4	Ptprs	0.995967741935484	1	161	NAhd	NA	hd	Erbb4 Ptprs
Erbb4	Ptprz1	0.995967741935484	1	161	NAhd	NA	NA	Erbb4 Ptprz1
Erbb4	Rab3c	0.991935483870968	0.997983870967742	161	NAhd	NA	hd	Erbb4 Rab3c
Erbb4	Ranbp17	0.931451612903226	1	161	NAhd	NA	NA	Erbb4 Ranbp17
Erbb4	Rasgrp1	0.866935483870968	1	161	NAhd	NA	hd	Erbb4 Rasgrp1
Erbb4	Rev3l	1	0.997983870967742	161	NAhd	NA	NA	Erbb4 Rev3l
Erbb4	Rgs20	1	1	161	NAhd	NA	NA	Erbb4 Rgs20
Erbb4	Rimbp2	0.975806451612903	1	161	NAhd	NA	NA	Erbb4 Rimbp2
Erbb4	Robo1	0.931451612903226	1	161	NAhd	NA	NA	Erbb4 Robo1
Erbb4	Rogdi	0.854838709677419	1	161	NAhd	NA	hd	Erbb4 Rogdi
Erbb4	Rtn1	0.991935483870968	1	161	NAhd	NA	hd	Erbb4 Rtn1
Erbb4	Rtn4	0.955645161290323	1	161	NAhd	NA	NA	Erbb4 Rtn4
Erbb4	Satb2	0.991935483870968	1	161	NAhd	NA	NA	Erbb4 Satb2
Erbb4	Sbf2	0.850806451612903	1	161	NAhd	NA	hd	Erbb4 Sbf2
Erbb4	Scaper	0.955645161290323	1	161	NAhd	NA	NA	Erbb4 Scaper
Erbb4	Scg5	0.971774193548387	1	161	NAhd	NA	hd	Erbb4 Scg5
Erbb4	Sel1l3	0.92741935483871	1	161	NAhd	NA	NA	Erbb4 Sel1l3
Erbb4	Senp6	0.862903225806452	1	161	NAhd	NA	hd	Erbb4 Senp6
Erbb4	Senp7	0.983870967741935	1	161	NAhd	NA	NA	Erbb4 Senp7
Erbb4	Sh3gl2	0.967741935483871	1	161	NAhd	NA	hd	Erbb4 Sh3gl2
Erbb4	Shtn1	0.891129032258065	1	161	NAhd	NA	NA	Erbb4 Shtn1
Erbb4	Slc17a7	0.991935483870968	1	161	NAhd	NA	NA	Erbb4 Slc17a7
Erbb4	Slc35f1	0.995967741935484	1	161	NAhd	NA	NA	Erbb4 Slc35f1
Erbb4	Slc35f4	0.983870967741935	1	161	NAhd	NA	NA	Erbb4 Slc35f4
Erbb4	Slc38a9	0.891129032258065	1	161	NAhd	NA	NA	Erbb4 Slc38a9
Erbb4	Slc4a4	0.895161290322581	1	161	NAhd	NA	NA	Erbb4 Slc4a4
Erbb4	Slc9a9	0.899193548387097	1	161	NAhd	NA	NA	Erbb4 Slc9a9
Erbb4	Sltm	0.915322580645161	1	161	NAhd	NA	hd	Erbb4 Sltm
Erbb4	Smad3	0.92741935483871	1	161	NAhd	NA	NA	Erbb4 Smad3
Erbb4	Snrnp70	0.987903225806452	1	161	NAhd	NA	NA	Erbb4 Snrnp70
Erbb4	Sobp	0.919354838709677	1	161	NAhd	NA	NA	Erbb4 Sobp
Erbb4	Son	0.907258064516129	0.997311827956989	161	NAhd	NA	NA	Erbb4 Son
Erbb4	Sorcs2	1	1	161	NAhd	NA	NA	Erbb4 Sorcs2
Erbb4	Ssbp4	0.911290322580645	1	161	NAhd	NA	hd	Erbb4 Ssbp4
Erbb4	Stx1a	0.971774193548387	1	161	NAhd	NA	NA	Erbb4 Stx1a
Erbb4	Syn3	0.971774193548387	1	161	NAhd	NA	NA	Erbb4 Syn3
Erbb4	Taf15	0.887096774193548	1	161	NAhd	NA	NA	Erbb4 Taf15
Erbb4	Tenm3	1	1	161	NAhd	NA	NA	Erbb4 Tenm3
Erbb4	Tmcc3	0.963709677419355	1	161	NAhd	NA	hd	Erbb4 Tmcc3
Erbb4	Tmem117	0.995967741935484	1	161	NAhd	NA	NA	Erbb4 Tmem117
Erbb4	Tmem191c	0.995967741935484	1	161	NAhd	NA	NA	Erbb4 Tmem191c
Erbb4	Tmsb4x	0.935483870967742	1	161	NAhd	NA	NA	Erbb4 Tmsb4x
Erbb4	Trpc5	0.899193548387097	1	161	NAhd	NA	NA	Erbb4 Trpc5
Erbb4	Ttll7	0.995967741935484	1	161	NAhd	NA	NA	Erbb4 Ttll7
Erbb4	Usp29	0.907258064516129	1	161	NAhd	NA	hd	Erbb4 Usp29
Erbb4	Usp48	0.991935483870968	1	161	NAhd	NA	hd	Erbb4 Usp48
Erbb4	Wapl	0.991935483870968	1	161	NAhd	NA	NA	Erbb4 Wapl
Erbb4	Wscd2	0.987903225806452	1	161	NAhd	NA	NA	Erbb4 Wscd2
Erbb4	Zbtb20	0.991935483870968	0.918010752688172	161	NAhd	NA	NA	Erbb4 Zbtb20
Erbb4	Zcchc16	0.959677419354839	1	161	NAhd	NA	NA	Erbb4 Zcchc16
Erbb4	Zcchc18	0.951612903225806	1	161	NAhd	NA	NA	Erbb4 Zcchc18
Erbb4	Zeb1	0.907258064516129	1	161	NAhd	NA	NA	Erbb4 Zeb1
Erbb4	Zfhx3	0.975806451612903	1	161	NAhd	NA	NA	Erbb4 Zfhx3
Erbb4	Zfp950	0.92741935483871	1	161	NAhd	NA	NA	Erbb4 Zfp950
Erbb4	Zfyve28	0.983870967741935	1	161	NAhd	NA	NA	Erbb4 Zfyve28
Erbb4	Zwint	0.959677419354839	1	161	NAhd	NA	NA	Erbb4 Zwint
Etl4	Ankfn1	0.899193548387097	1	5	NAhd	NA	hd	Etl4 Ankfn1
Etl4	Cdh11	0.975806451612903	0.995967741935484	5	wtNA	NA	wt	Etl4 Cdh11
Etl4	Cdh18	0.959677419354839	0.554435483870968	5	NAhd	NA	NA	Etl4 Cdh18
Etl4	Epha6	0.94758064516129	0.983198924731183	5	wtNA	NA	NA	Etl4 Epha6
Etl4	Fam19a1	1	0.538306451612903	5	NAhd	NA	NA	Etl4 Fam19a1
Etl4	Gm17171	1	0.985887096774194	5	wthd	NA	NA	Etl4 Gm17171
Etl4	Pde10a	0.854838709677419	0.995967741935484	5	NAhd	NA	NA	Etl4 Pde10a
Etl4	Plekhg5	0.862903225806452	0.988575268817204	5	wtNA	NA	NA	Etl4 Plekhg5
Etl4	Sorcs3	0.943548387096774	0.991935483870968	5	wtNA	NA	NA	Etl4 Sorcs3
Fam19a1	Astn2	1	1	15	wthd	NA	NA	Fam19a1 Astn2
Fam19a1	Cdh18	0.991935483870968	0.533602150537634	17	NAhd	NA	NA	Fam19a1 Cdh18
Fam19a1	Cntnap5a	0.895161290322581	0.979838709677419	17	NAhd	NA	NA	Fam19a1 Cntnap5a
Fam19a1	Dab1	0.979838709677419	1	17	NAhd	NA	NA	Fam19a1 Dab1
Fam19a1	Dpyd	0.995967741935484	0.970430107526882	15	wtNA	NA	NA	Fam19a1 Dpyd
Fam19a1	Epb41	0.979838709677419	0.946236559139785	15	wtNA	NA	NA	Fam19a1 Epb41
Fam19a1	Frmpd4	1	0.743951612903226	17	NAhd	NA	NA	Fam19a1 Frmpd4
Fam19a1	Fut9	1	0.979838709677419	17	NAhd	NA	hd	Fam19a1 Fut9
Fam19a1	Gm20754	0.955645161290323	1	15	wtNA	NA	NA	Fam19a1 Gm20754
Fam19a1	Gpc6	0.931451612903226	0.995967741935484	17	NAhd	NA	NA	Fam19a1 Gpc6
Fam19a1	Hdac9	0.879032258064516	0.846774193548387	17	NAhd	NA	hd	Fam19a1 Hdac9
Fam19a1	Hs3st4	0.971774193548387	0.557795698924731	17	NAhd	NA	NA	Fam19a1 Hs3st4
Fam19a1	Kcnq5	0.975806451612903	1	15	wtNA	NA	NA	Fam19a1 Kcnq5
Fam19a1	Lpp	0.991935483870968	1	17	NAhd	NA	NA	Fam19a1 Lpp
Fam19a1	Mmp16	1	0.63508064516129	17	NAhd	NA	NA	Fam19a1 Mmp16
Fam19a1	Ndst3	0.963709677419355	1	17	NAhd	NA	hd	Fam19a1 Ndst3
Fam19a1	Nkain3	0.951612903225806	1	17	NAhd	NA	NA	Fam19a1 Nkain3
Fam19a1	Nlgn1	0.850806451612903	0.957661290322581	15	wtNA	NA	NA	Fam19a1 Nlgn1
Fam19a1	Olfm3	0.971774193548387	0.995967741935484	15	wtNA	NA	wt	Fam19a1 Olfm3
Fam19a1	Pbx1	0.875	0.577284946236559	17	NAhd	NA	hd	Fam19a1 Pbx1
Fam19a1	Pcdh9	1	0.993951612903226	15	wtNA	NA	NA	Fam19a1 Pcdh9
Fam19a1	Pdzrn3	0.94758064516129	0.928763440860215	15	wtNA	NA	NA	Fam19a1 Pdzrn3
Fam19a1	Ppfibp1	1	0.995967741935484	17	NAhd	NA	NA	Fam19a1 Ppfibp1
Fam19a1	Rad51ap2	0.959677419354839	1	15	wtNA	NA	wt	Fam19a1 Rad51ap2
Fam19a1	Sdk1	0.883064516129032	1	15	wtNA	NA	NA	Fam19a1 Sdk1
Fam19a1	Sphkap	1	0.979838709677419	15	wthd	NA	NA	Fam19a1 Sphkap
Fam19a1	Tenm4	0.919354838709677	0.987903225806452	15	wtNA	NA	NA	Fam19a1 Tenm4
Fam19a1	Thsd7b	1	0.743951612903226	15	wthd	NA	NA	Fam19a1 Thsd7b
Fam19a1	Zfp697	0.975806451612903	1	15	wtNA	NA	wt	Fam19a1 Zfp697
Fam19a2	Arhgap26	1	1	15	wtNA	NA	NA	Fam19a2 Arhgap26
Fam19a2	Atp2b1	0.935483870967742	1	15	wthd	NA	NA	Fam19a2 Atp2b1
Fam19a2	Cntn5	1	1	15	wthd	NA	NA	Fam19a2 Cntn5
Fam19a2	Cntnap5b	0.955645161290323	1	15	wtNA	NA	wt	Fam19a2 Cntnap5b
Fam19a2	Epha10	0.911290322580645	1	15	wtNA	NA	wt	Fam19a2 Epha10
Fam19a2	Epha6	0.915322580645161	0.592741935483871	15	wtNA	NA	NA	Fam19a2 Epha6
Fam19a2	Fbxo34	0.963709677419355	1	15	wtNA	NA	wt	Fam19a2 Fbxo34
Fam19a2	Gpr158	0.963709677419355	1	8	NAhd	NA	NA	Fam19a2 Gpr158
Fam19a2	Grik4	1	1	15	wtNA	NA	NA	Fam19a2 Grik4
Fam19a2	Inpp4b	0.983870967741935	1	8	NAhd	NA	hd	Fam19a2 Inpp4b
Fam19a2	Myo16	0.903225806451613	1	15	wtNA	NA	NA	Fam19a2 Myo16
Fam19a2	Ppfibp1	0.991935483870968	1	15	wtNA	NA	NA	Fam19a2 Ppfibp1
Fam19a2	Robo2	0.895161290322581	1	8	NAhd	NA	NA	Fam19a2 Robo2
Fam19a2	Sema6a	0.951612903225806	1	8	NAhd	NA	hd	Fam19a2 Sema6a
Fam19a2	Tanc1	0.887096774193548	1	15	wtNA	NA	NA	Fam19a2 Tanc1
Fam19a2	Tcf4	0.854838709677419	1	15	wtNA	NA	NA	Fam19a2 Tcf4
Fam19a2	Thsd7a	0.991935483870968	0.995967741935484	8	NAhd	NA	NA	Fam19a2 Thsd7a
Fam19a2	Unc13c	0.971774193548387	1	15	wtNA	NA	NA	Fam19a2 Unc13c
Fam19a2	Zfp536	0.955645161290323	1	8	NAhd	NA	NA	Fam19a2 Zfp536
Fam19a2	Zfp618	1	1	15	wtNA	NA	wt	Fam19a2 Zfp618
Fam19a2	Zfp804b	0.923387096774194	1	15	wtNA	NA	NA	Fam19a2 Zfp804b
Fmn1	Gm13963	1	1	1	wthd	NA	NA	Fmn1 Gm13963
Foxp2	Cdh10	0.959677419354839	1	7	wtNA	NA	wt	Foxp2 Cdh10
Foxp2	Col5a1	0.923387096774194	0.993279569892473	7	wtNA	NA	wt	Foxp2 Col5a1
Foxp2	Ephb1	0.915322580645161	1	7	wtNA	NA	NA	Foxp2 Ephb1
Foxp2	Nrxn3	1	1	7	wtNA	NA	wt	Foxp2 Nrxn3
Foxp2	Srgap3	0.963709677419355	0.938172043010753	7	wtNA	NA	wt	Foxp2 Srgap3
Foxp2	Tmem178b	0.979838709677419	0.978494623655914	7	wtNA	NA	NA	Foxp2 Tmem178b
Foxp2	Unc5c	1	1	7	wtNA	NA	wt	Foxp2 Unc5c
Frmd4b	2010111I01Rik	0.991935483870968	1	178	wtNA	NA	NA	Frmd4b 2010111I01Rik
Frmd4b	5330434G04Rik	1	0.997983870967742	178	wtNA	NA	NA	Frmd4b 5330434G04Rik
Frmd4b	A930015D03Rik	0.854838709677419	1	178	wtNA	NA	wt	Frmd4b A930015D03Rik
Frmd4b	Abhd2	0.915322580645161	0.994623655913979	178	wtNA	NA	NA	Frmd4b Abhd2
Frmd4b	Actn1	0.875	1	178	wtNA	NA	wt	Frmd4b Actn1
Frmd4b	Acyp2	0.995967741935484	1	178	wtNA	NA	NA	Frmd4b Acyp2
Frmd4b	Adam22	0.983870967741935	0.975806451612903	178	wtNA	NA	wt	Frmd4b Adam22
Frmd4b	Adam23	0.919354838709677	0.993279569892473	178	wtNA	NA	NA	Frmd4b Adam23
Frmd4b	Adgrb1	0.94758064516129	1	178	wtNA	NA	NA	Frmd4b Adgrb1
Frmd4b	Adgrb2	0.919354838709677	0.988575268817204	178	wtNA	NA	wt	Frmd4b Adgrb2
Frmd4b	Adrbk2	0.915322580645161	1	178	wtNA	NA	wt	Frmd4b Adrbk2
Frmd4b	Aff2	0.891129032258065	1	178	wtNA	NA	wt	Frmd4b Aff2
Frmd4b	Aig1	0.854838709677419	0.983870967741935	178	wtNA	NA	wt	Frmd4b Aig1
Frmd4b	Arhgap10	0.907258064516129	0.987903225806452	178	wtNA	NA	wt	Frmd4b Arhgap10
Frmd4b	Arnt2	0.979838709677419	0.987903225806452	178	wtNA	NA	NA	Frmd4b Arnt2
Frmd4b	Asxl3	0.870967741935484	0.997983870967742	178	wtNA	NA	wt	Frmd4b Asxl3
Frmd4b	Atad2b	0.891129032258065	0.995295698924731	178	wtNA	NA	wt	Frmd4b Atad2b
Frmd4b	Atf2	0.931451612903226	0.981182795698925	178	wtNA	NA	wt	Frmd4b Atf2
Frmd4b	Atp6v0a1	0.875	1	178	wtNA	NA	wt	Frmd4b Atp6v0a1
Frmd4b	Basp1	0.866935483870968	0.979838709677419	178	wtNA	NA	wt	Frmd4b Basp1
Frmd4b	BC005561	0.903225806451613	0.997983870967742	178	wtNA	NA	wt	Frmd4b BC005561
Frmd4b	Bcas3	0.887096774193548	0.984543010752688	178	wtNA	NA	wt	Frmd4b Bcas3
Frmd4b	Btaf1	0.887096774193548	1	178	wtNA	NA	wt	Frmd4b Btaf1
Frmd4b	Bzrap1	0.967741935483871	1	178	wtNA	NA	wt	Frmd4b Bzrap1
Frmd4b	C530008M17Rik	0.903225806451613	0.995967741935484	178	wtNA	NA	wt	Frmd4b C530008M17Rik
Frmd4b	Car11	0.915322580645161	1	178	wtNA	NA	wt	Frmd4b Car11
Frmd4b	Cask	0.915322580645161	0.991935483870968	178	wtNA	NA	NA	Frmd4b Cask
Frmd4b	Ccdc85a	0.979838709677419	1	178	wtNA	NA	NA	Frmd4b Ccdc85a
Frmd4b	Ccnl2	0.991935483870968	1	178	wtNA	NA	wt	Frmd4b Ccnl2
Frmd4b	Cdc42	0.983870967741935	0.995967741935484	178	wtNA	NA	NA	Frmd4b Cdc42
Frmd4b	Cdk14	0.995967741935484	1	178	wtNA	NA	wt	Frmd4b Cdk14
Frmd4b	Cfap54	0.915322580645161	1	178	wtNA	NA	wt	Frmd4b Cfap54
Frmd4b	Chuk	0.850806451612903	0.987903225806452	178	wtNA	NA	NA	Frmd4b Chuk
Frmd4b	Cntn3	0.983870967741935	1	178	wtNA	NA	NA	Frmd4b Cntn3
Frmd4b	Cog5	0.939516129032258	0.991263440860215	178	wtNA	NA	NA	Frmd4b Cog5
Frmd4b	Cstf3	0.975806451612903	0.997983870967742	178	wtNA	NA	NA	Frmd4b Cstf3
Frmd4b	Ctdspl	0.94758064516129	0.995967741935484	178	wtNA	NA	wt	Frmd4b Ctdspl
Frmd4b	D430041D05Rik	0.979838709677419	1	178	wtNA	NA	wt	Frmd4b D430041D05Rik
Frmd4b	Dagla	0.979838709677419	1	178	wtNA	NA	wt	Frmd4b Dagla
Frmd4b	Dclk2	1	0.993951612903226	178	wtNA	NA	NA	Frmd4b Dclk2
Frmd4b	Ddx5	0.991935483870968	0.993951612903226	178	wtNA	NA	NA	Frmd4b Ddx5
Frmd4b	Desi2	0.979838709677419	0.991935483870968	178	wtNA	NA	wt	Frmd4b Desi2
Frmd4b	Dnm1l	0.975806451612903	0.995967741935484	178	wtNA	NA	wt	Frmd4b Dnm1l
Frmd4b	Ehbp1	0.915322580645161	0.98991935483871	178	wtNA	NA	wt	Frmd4b Ehbp1
Frmd4b	Epb41	0.983870967741935	0.997983870967742	178	wtNA	NA	NA	Frmd4b Epb41
Frmd4b	Epha4	0.919354838709677	0.981182795698925	178	wtNA	NA	wt	Frmd4b Epha4
Frmd4b	Faah	0.854838709677419	0.990591397849462	178	wtNA	NA	wt	Frmd4b Faah
Frmd4b	Fam131a	0.887096774193548	0.96505376344086	178	wtNA	NA	wt	Frmd4b Fam131a
Frmd4b	Fam193a	0.979838709677419	0.993951612903226	178	wtNA	NA	NA	Frmd4b Fam193a
Frmd4b	Fnbp1l	0.987903225806452	0.98991935483871	178	wtNA	NA	wt	Frmd4b Fnbp1l
Frmd4b	Ftx	0.875	0.991263440860215	178	wtNA	NA	wt	Frmd4b Ftx
Frmd4b	Gab2	1	0.997983870967742	178	wtNA	NA	NA	Frmd4b Gab2
Frmd4b	Galnt13	0.967741935483871	1	178	wtNA	NA	wt	Frmd4b Galnt13
Frmd4b	Gbf1	0.991935483870968	0.985887096774194	178	wtNA	NA	wt	Frmd4b Gbf1
Frmd4b	Gigyf2	1	0.98991935483871	178	wtNA	NA	wt	Frmd4b Gigyf2
Frmd4b	Glg1	0.887096774193548	0.98252688172043	178	wtNA	NA	wt	Frmd4b Glg1
Frmd4b	Gm10419	1	0.987903225806452	178	wtNA	NA	wt	Frmd4b Gm10419
Frmd4b	Gm20642	0.879032258064516	0.936155913978495	178	wtNA	NA	NA	Frmd4b Gm20642
Frmd4b	Gm26691	1	0.987903225806452	178	wtNA	NA	NA	Frmd4b Gm26691
Frmd4b	Gm26699	0.963709677419355	0.995967741935484	178	wtNA	NA	wt	Frmd4b Gm26699
Frmd4b	Gm42418	0.94758064516129	0.985887096774194	178	wtNA	NA	NA	Frmd4b Gm42418
Frmd4b	Gm42439	0.983870967741935	1	178	wtNA	NA	NA	Frmd4b Gm42439
Frmd4b	Gmds	1	0.98991935483871	178	wtNA	NA	wt	Frmd4b Gmds
Frmd4b	Gnb1	1	0.987903225806452	178	wtNA	NA	wt	Frmd4b Gnb1
Frmd4b	Gng7	1	1	178	wtNA	NA	NA	Frmd4b Gng7
Frmd4b	Gpatch8	0.931451612903226	0.993279569892473	178	wtNA	NA	NA	Frmd4b Gpatch8
Frmd4b	Gpi1	0.931451612903226	1	178	wtNA	NA	NA	Frmd4b Gpi1
Frmd4b	Hecw1	0.963709677419355	1	178	wtNA	NA	wt	Frmd4b Hecw1
Frmd4b	Igsf11	0.995967741935484	0.509408602150538	178	wtNA	NA	NA	Frmd4b Igsf11
Frmd4b	Il11ra1	0.850806451612903	0.995295698924731	178	wtNA	NA	wt	Frmd4b Il11ra1
Frmd4b	Immp1l	1	0.997983870967742	178	wtNA	NA	wt	Frmd4b Immp1l
Frmd4b	Itpka	0.987903225806452	1	178	wtNA	NA	wt	Frmd4b Itpka
Frmd4b	Itpr1	0.955645161290323	1	178	wtNA	NA	NA	Frmd4b Itpr1
Frmd4b	Jph1	0.975806451612903	1	178	wtNA	NA	NA	Frmd4b Jph1
Frmd4b	Kcnq1	0.959677419354839	0.98252688172043	178	wtNA	NA	wt	Frmd4b Kcnq1
Frmd4b	Klc1	1	1	178	wtNA	NA	wt	Frmd4b Klc1
Frmd4b	Klf12	0.895161290322581	0.990591397849462	178	wtNA	NA	wt	Frmd4b Klf12
Frmd4b	Lpgat1	0.995967741935484	0.963709677419355	178	wtNA	NA	wt	Frmd4b Lpgat1
Frmd4b	Lrch3	1	0.98991935483871	178	wtNA	NA	NA	Frmd4b Lrch3
Frmd4b	Lrtm1	0.862903225806452	1	178	wtNA	NA	NA	Frmd4b Lrtm1
Frmd4b	Ly6h	0.991935483870968	0.995967741935484	178	wtNA	NA	wt	Frmd4b Ly6h
Frmd4b	Lyst	0.963709677419355	0.997983870967742	178	wtNA	NA	wt	Frmd4b Lyst
Frmd4b	Mcu	1	0.997983870967742	178	wtNA	NA	wt	Frmd4b Mcu
Frmd4b	Mdm4	0.991935483870968	0.981854838709677	178	wtNA	NA	NA	Frmd4b Mdm4
Frmd4b	Miat	0.971774193548387	1	178	wtNA	NA	NA	Frmd4b Miat
Frmd4b	Mical2	0.854838709677419	1	178	wtNA	NA	wt	Frmd4b Mical2
Frmd4b	Mirg	0.979838709677419	0.973790322580645	178	wtNA	NA	wt	Frmd4b Mirg
Frmd4b	Mpped1	0.883064516129032	1	178	wtNA	NA	NA	Frmd4b Mpped1
Frmd4b	Msra	0.991935483870968	0.995967741935484	178	wtNA	NA	wt	Frmd4b Msra
Frmd4b	Myrip	0.967741935483871	1	178	wtNA	NA	NA	Frmd4b Myrip
Frmd4b	Nipbl	0.955645161290323	1	178	wtNA	NA	wt	Frmd4b Nipbl
Frmd4b	Npepps	0.995967741935484	0.993951612903226	178	wtNA	NA	NA	Frmd4b Npepps
Frmd4b	Nr6a1	0.979838709677419	0.977822580645161	178	wtNA	NA	wt	Frmd4b Nr6a1
Frmd4b	Nyap2	0.951612903225806	1	178	wtNA	NA	wt	Frmd4b Nyap2
Frmd4b	Ogt	0.899193548387097	1	178	wtNA	NA	wt	Frmd4b Ogt
Frmd4b	Osbp2	0.975806451612903	1	178	wtNA	NA	wt	Frmd4b Osbp2
Frmd4b	Osbpl9	0.862903225806452	0.995967741935484	178	wtNA	NA	wt	Frmd4b Osbpl9
Frmd4b	Pacrg	1	1	178	wtNA	NA	wt	Frmd4b Pacrg
Frmd4b	Pard3	0.991935483870968	0.951612903225806	178	wtNA	NA	NA	Frmd4b Pard3
Frmd4b	Paxbp1	0.987903225806452	0.983198924731183	178	wtNA	NA	NA	Frmd4b Paxbp1
Frmd4b	Pcdh10	0.935483870967742	1	178	wtNA	NA	wt	Frmd4b Pcdh10
Frmd4b	Pcdh17	1	1	178	wtNA	NA	NA	Frmd4b Pcdh17
Frmd4b	Pdss2	0.943548387096774	0.993951612903226	178	wtNA	NA	wt	Frmd4b Pdss2
Frmd4b	Pibf1	0.895161290322581	1	178	wtNA	NA	NA	Frmd4b Pibf1
Frmd4b	PISD	0.879032258064516	1	178	wtNA	NA	wt	Frmd4b PISD
Frmd4b	Pkn2	0.963709677419355	1	178	wtNA	NA	wt	Frmd4b Pkn2
Frmd4b	Pknox2	0.931451612903226	1	178	wtNA	NA	wt	Frmd4b Pknox2
Frmd4b	Plekhg5	0.971774193548387	0.98991935483871	178	wtNA	NA	NA	Frmd4b Plekhg5
Frmd4b	Plppr4	0.987903225806452	1	178	wtNA	NA	NA	Frmd4b Plppr4
Frmd4b	Plxdc2	0.883064516129032	0.951612903225806	178	wtNA	NA	wt	Frmd4b Plxdc2
Frmd4b	Pnisr	0.875	0.986559139784946	178	wtNA	NA	NA	Frmd4b Pnisr
Frmd4b	Polb	1	0.997983870967742	178	wtNA	NA	NA	Frmd4b Polb
Frmd4b	Pou2f2	0.879032258064516	0.946908602150538	178	wtNA	NA	wt	Frmd4b Pou2f2
Frmd4b	Ppm1e	0.967741935483871	1	178	wtNA	NA	wt	Frmd4b Ppm1e
Frmd4b	Ppme1	0.971774193548387	1	178	wtNA	NA	wt	Frmd4b Ppme1
Frmd4b	Ppp1r16b	0.983870967741935	1	178	wtNA	NA	NA	Frmd4b Ppp1r16b
Frmd4b	Ppp2r3a	0.995967741935484	0.995967741935484	178	wtNA	NA	wt	Frmd4b Ppp2r3a
Frmd4b	Psap	1	1	178	wtNA	NA	wt	Frmd4b Psap
Frmd4b	Ptprr	0.995967741935484	1	178	wtNA	NA	NA	Frmd4b Ptprr
Frmd4b	Ptprz1	0.951612903225806	1	178	wtNA	NA	NA	Frmd4b Ptprz1
Frmd4b	Pura	0.995967741935484	0.985887096774194	178	wtNA	NA	wt	Frmd4b Pura
Frmd4b	Pvt1	0.870967741935484	0.979838709677419	178	wtNA	NA	wt	Frmd4b Pvt1
Frmd4b	Rab30	1	0.995967741935484	178	wtNA	NA	wt	Frmd4b Rab30
Frmd4b	Ranbp17	0.959677419354839	1	178	wtNA	NA	NA	Frmd4b Ranbp17
Frmd4b	Rev3l	0.987903225806452	0.995967741935484	178	wtNA	NA	NA	Frmd4b Rev3l
Frmd4b	Rgs20	1	0.993951612903226	178	wtNA	NA	NA	Frmd4b Rgs20
Frmd4b	Rimbp2	0.987903225806452	1	178	wtNA	NA	NA	Frmd4b Rimbp2
Frmd4b	Rit2	0.919354838709677	0.987231182795699	178	wtNA	NA	wt	Frmd4b Rit2
Frmd4b	Rmdn1	0.959677419354839	0.997983870967742	178	wtNA	NA	wt	Frmd4b Rmdn1
Frmd4b	RP24-127M20.8	0.931451612903226	0.971774193548387	178	wtNA	NA	NA	Frmd4b RP24-127M20.8
Frmd4b	Rsrc1	0.983870967741935	0.997983870967742	178	wtNA	NA	wt	Frmd4b Rsrc1
Frmd4b	Rtn4	0.931451612903226	0.991935483870968	178	wtNA	NA	NA	Frmd4b Rtn4
Frmd4b	Rufy3	0.971774193548387	0.987231182795699	178	wtNA	NA	wt	Frmd4b Rufy3
Frmd4b	Scmh1	0.939516129032258	0.991935483870968	178	wtNA	NA	wt	Frmd4b Scmh1
Frmd4b	Scn1a	0.850806451612903	1	178	wtNA	NA	wt	Frmd4b Scn1a
Frmd4b	Senp7	0.995967741935484	0.991935483870968	178	wtNA	NA	NA	Frmd4b Senp7
Frmd4b	Sh3kbp1	0.987903225806452	0.99260752688172	178	wtNA	NA	wt	Frmd4b Sh3kbp1
Frmd4b	Shank1	0.862903225806452	0.990591397849462	178	wtNA	NA	wt	Frmd4b Shank1
Frmd4b	Shtn1	1	0.98991935483871	178	wtNA	NA	NA	Frmd4b Shtn1
Frmd4b	Sidt1	0.858870967741935	1	178	wtNA	NA	wt	Frmd4b Sidt1
Frmd4b	Slc38a9	0.92741935483871	0.983870967741935	178	wtNA	NA	NA	Frmd4b Slc38a9
Frmd4b	Slc4a4	0.907258064516129	0.971774193548387	178	wtNA	NA	NA	Frmd4b Slc4a4
Frmd4b	Slco3a1	1	0.997983870967742	178	wtNA	NA	wt	Frmd4b Slco3a1
Frmd4b	Smad3	0.903225806451613	1	178	wtNA	NA	NA	Frmd4b Smad3
Frmd4b	Snrnp70	0.987903225806452	0.977822580645161	178	wtNA	NA	NA	Frmd4b Snrnp70
Frmd4b	Snx29	1	0.997983870967742	178	wtNA	NA	wt	Frmd4b Snx29
Frmd4b	Sobp	0.870967741935484	1	178	wtNA	NA	NA	Frmd4b Sobp
Frmd4b	Son	0.979838709677419	1	178	wtNA	NA	NA	Frmd4b Son
Frmd4b	Sorcs2	0.92741935483871	0.90994623655914	178	wtNA	NA	NA	Frmd4b Sorcs2
Frmd4b	Specc1	0.883064516129032	0.975806451612903	178	wtNA	NA	wt	Frmd4b Specc1
Frmd4b	Sptbn1	0.935483870967742	0.987231182795699	178	wtNA	NA	wt	Frmd4b Sptbn1
Frmd4b	Stx1a	0.907258064516129	1	178	wtNA	NA	NA	Frmd4b Stx1a
Frmd4b	Sun1	0.943548387096774	1	178	wtNA	NA	wt	Frmd4b Sun1
Frmd4b	Synpo	0.971774193548387	0.995295698924731	178	wtNA	NA	wt	Frmd4b Synpo
Frmd4b	Taf15	0.995967741935484	0.995967741935484	178	wtNA	NA	NA	Frmd4b Taf15
Frmd4b	Thrb	0.931451612903226	1	178	wtNA	NA	wt	Frmd4b Thrb
Frmd4b	Tmem117	0.975806451612903	0.997983870967742	178	wtNA	NA	NA	Frmd4b Tmem117
Frmd4b	Tmem191c	0.899193548387097	1	178	wtNA	NA	NA	Frmd4b Tmem191c
Frmd4b	Tmsb4x	0.858870967741935	0.995967741935484	178	wtNA	NA	NA	Frmd4b Tmsb4x
Frmd4b	Tmtc2	0.931451612903226	1	178	wtNA	NA	NA	Frmd4b Tmtc2
Frmd4b	Trank1	0.991935483870968	1	178	wtNA	NA	wt	Frmd4b Trank1
Frmd4b	Tsc22d1	1	0.983870967741935	178	wtNA	NA	wt	Frmd4b Tsc22d1
Frmd4b	Ttll7	1	0.993951612903226	178	wtNA	NA	NA	Frmd4b Ttll7
Frmd4b	Ubb	0.887096774193548	0.995967741935484	178	wtNA	NA	wt	Frmd4b Ubb
Frmd4b	Unc13b	0.879032258064516	1	178	wtNA	NA	wt	Frmd4b Unc13b
Frmd4b	Vps37a	0.850806451612903	0.977822580645161	178	wtNA	NA	wt	Frmd4b Vps37a
Frmd4b	Wapl	0.887096774193548	0.997983870967742	178	wtNA	NA	NA	Frmd4b Wapl
Frmd4b	Whsc1l1	0.866935483870968	0.979166666666667	178	wtNA	NA	wt	Frmd4b Whsc1l1
Frmd4b	Wnk1	1	0.995967741935484	178	wtNA	NA	wt	Frmd4b Wnk1
Frmd4b	Zbtb20	0.991935483870968	0.973790322580645	178	wtNA	NA	NA	Frmd4b Zbtb20
Frmd4b	Zcchc18	0.959677419354839	0.997983870967742	178	wtNA	NA	NA	Frmd4b Zcchc18
Frmd4b	Zfp292	1	0.995967741935484	178	wtNA	NA	wt	Frmd4b Zfp292
Frmd4b	Zfp697	0.919354838709677	1	178	wtNA	NA	wt	Frmd4b Zfp697
Frmd4b	Zfp950	0.923387096774194	0.997983870967742	178	wtNA	NA	NA	Frmd4b Zfp950
Frmd4b	Zfyve28	0.971774193548387	0.969086021505376	178	wtNA	NA	NA	Frmd4b Zfyve28
Frmd4b	Zmynd8	0.995967741935484	0.995967741935484	178	wtNA	NA	wt	Frmd4b Zmynd8
Frmd4b	Zranb2	0.987903225806452	1	178	wtNA	NA	wt	Frmd4b Zranb2
Frmd4b	Zwint	1	1	178	wtNA	NA	NA	Frmd4b Zwint
Frmpd4	Asic2	0.967741935483871	0.997983870967742	5	wtNA	NA	NA	Frmpd4 Asic2
Frmpd4	Ccser1	0.866935483870968	0.991935483870968	2	NAhd	NA	hd	Frmpd4 Ccser1
Frmpd4	Fam19a1	0.907258064516129	0.524193548387097	5	wtNA	NA	NA	Frmpd4 Fam19a1
Frmpd4	Mmp16	0.891129032258065	1	5	wtNA	NA	NA	Frmpd4 Mmp16
Frmpd4	Ntng1	1	1	5	wthd	NA	NA	Frmpd4 Ntng1
Frmpd4	Trps1	0.971774193548387	1	5	wtNA	NA	NA	Frmpd4 Trps1
Fstl4	Car10	0.858870967741935	0.924731182795699	6	wtNA	NA	NA	Fstl4 Car10
Fstl4	Grip1	0.983870967741935	0.997311827956989	6	wtNA	NA	NA	Fstl4 Grip1
Fstl4	Kcnh1	0.939516129032258	1	1	NAhd	NA	hd	Fstl4 Kcnh1
Fstl4	Kctd16	0.975806451612903	0.806451612903226	6	wtNA	NA	NA	Fstl4 Kctd16
Fstl4	Ncam1	0.955645161290323	1	6	wtNA	NA	wt	Fstl4 Ncam1
Fstl4	Park2	0.963709677419355	1	6	wtNA	NA	NA	Fstl4 Park2
Fstl4	Pdp1	0.967741935483871	1	6	wtNA	NA	wt	Fstl4 Pdp1
Gabra2	Cfap54	0.887096774193548	1	1	wtNA	NA	wt	Gabra2 Cfap54
Galntl6	Gm26905	1	0.997983870967742	5	wthd	NA	NA	Galntl6 Gm26905
Galntl6	Gsg1l	0.858870967741935	0.994623655913978	5	wtNA	NA	NA	Galntl6 Gsg1l
Galntl6	Mgat5	0.983870967741935	0.885752688172043	5	NAhd	NA	NA	Galntl6 Mgat5
Galntl6	Ncam2	0.951612903225806	0.989247311827957	5	wthd	NA	NA	Galntl6 Ncam2
Galntl6	Ptprm	0.983870967741935	0.987903225806452	5	wthd	NA	NA	Galntl6 Ptprm
Galntl6	Sgcz	0.987903225806452	0.995967741935484	5	NAhd	NA	NA	Galntl6 Sgcz
Galntl6	Sorcs1	0.967741935483871	0.990591397849462	5	wtNA	NA	NA	Galntl6 Sorcs1
Ghr	Zfhx3	1	0.979838709677419	1	NAhd	NA	NA	Ghr Zfhx3
Gm13629	Scn9a	1	0.975806451612903	1	NAhd	NA	NA	Gm13629 Scn9a
Gm15398	Pcdh15	1	0.985887096774194	1	wthd	NA	NA	Gm15398 Pcdh15
Gm16599	Cux1	1	0.941532258064516	1	wthd	NA	NA	Gm16599 Cux1
Gm20642	RP24-127M20.8	0.854838709677419	0.959005376344086	1	NAhd	NA	NA	Gm20642 RP24-127M20.8
Gm20754	4930509J09Rik	1	1	1	wthd	NA	NA	Gm20754 4930509J09Rik
Gm20754	Grm8	0.983870967741935	0.926075268817204	2	NAhd	NA	NA	Gm20754 Grm8
Gm2163	4930578G10Rik	1	1	4	wthd	NA	NA	Gm2163 4930578G10Rik
Gm2163	Cntfr	0.850806451612903	1	4	wtNA	NA	wt	Gm2163 Cntfr
Gm2163	Gm10600	0.987903225806452	1	4	wtNA	NA	wt	Gm2163 Gm10600
Gm2163	Gm12394	1	1	4	wthd	NA	NA	Gm2163 Gm12394
Gm2163	Gm26835	0.995967741935484	1	3	NAhd	NA	NA	Gm2163 Gm26835
Gm26883	Tshz2	1	0.991935483870968	1	wthd	NA	NA	Gm26883 Tshz2
Gm27247	1700057H15Rik	1	1	8	wtNA	NA	wt	Gm27247 1700057H15Rik
Gm27247	Erc2	0.899193548387097	0.962365591397849	8	wtNA	NA	NA	Gm27247 Erc2
Gm27247	Gm13211	0.967741935483871	1	8	wtNA	NA	wt	Gm27247 Gm13211
Gm27247	Gm42705	0.991935483870968	1	8	wtNA	NA	NA	Gm27247 Gm42705
Gm27247	Hcn1	0.94758064516129	0.638440860215054	8	wtNA	NA	NA	Gm27247 Hcn1
Gm27247	Pbx3	0.943548387096774	1	8	wtNA	NA	NA	Gm27247 Pbx3
Gm27247	Prkg1	1	0.528225806451613	8	wtNA	NA	NA	Gm27247 Prkg1
Gm27247	Xkr4	1	0.991935483870968	8	wtNA	NA	NA	Gm27247 Xkr4
Gm28376	Jph1	1	1	1	wthd	NA	NA	Gm28376 Jph1
Gm28928	3110035E14Rik	0.899193548387097	1	29	wthd	NA	NA	Gm28928 3110035E14Rik
Gm28928	Adcy1	0.991935483870968	1	29	wtNA	NA	wt	Gm28928 Adcy1
Gm28928	Arhgap22	0.94758064516129	1	29	NAhd	NA	hd	Gm28928 Arhgap22
Gm28928	Cux1	0.923387096774194	0.884408602150538	29	wtNA	NA	NA	Gm28928 Cux1
Gm28928	Dkk3	1	0.997983870967742	29	wthd	NA	NA	Gm28928 Dkk3
Gm28928	Dlc1	0.987903225806452	1	29	wtNA	NA	NA	Gm28928 Dlc1
Gm28928	Dpp10	1	1	29	wthd	NA	NA	Gm28928 Dpp10
Gm28928	Epha5	0.923387096774194	1	29	NAhd	NA	hd	Gm28928 Epha5
Gm28928	Ext1	1	1	29	wthd	NA	NA	Gm28928 Ext1
Gm28928	Fam19a2	0.975806451612903	0.997983870967742	29	wtNA	NA	NA	Gm28928 Fam19a2
Gm28928	Fnbp1l	0.883064516129032	1	29	wtNA	NA	wt	Gm28928 Fnbp1l
Gm28928	Galnt9	0.919354838709677	0.997983870967742	29	NAhd	NA	NA	Gm28928 Galnt9
Gm28928	Gfra2	0.995967741935484	1	29	NAhd	NA	hd	Gm28928 Gfra2
Gm28928	Gpc6	0.939516129032258	1	29	NAhd	NA	NA	Gm28928 Gpc6
Gm28928	Grik1	1	1	29	wthd	NA	NA	Gm28928 Grik1
Gm28928	Hs3st2	1	1	29	wthd	NA	NA	Gm28928 Hs3st2
Gm28928	Htr2c	0.983870967741935	1	29	NAhd	NA	NA	Gm28928 Htr2c
Gm28928	Khdrbs3	1	0.987903225806452	29	wthd	NA	NA	Gm28928 Khdrbs3
Gm28928	Ldb2	1	1	29	NAhd	NA	NA	Gm28928 Ldb2
Gm28928	Limch1	1	1	29	wtNA	NA	wt	Gm28928 Limch1
Gm28928	Lingo2	0.903225806451613	1	29	wtNA	NA	NA	Gm28928 Lingo2
Gm28928	Mpped1	0.935483870967742	1	29	NAhd	NA	NA	Gm28928 Mpped1
Gm28928	Negr1	0.987903225806452	1	29	NAhd	NA	hd	Gm28928 Negr1
Gm28928	Nfib	0.870967741935484	1	29	NAhd	NA	NA	Gm28928 Nfib
Gm28928	Nfix	1	1	29	NAhd	NA	hd	Gm28928 Nfix
Gm28928	Nos1ap	0.983870967741935	1	29	wtNA	NA	wt	Gm28928 Nos1ap
Gm28928	Opcml	0.92741935483871	1	29	wthd	NA	NA	Gm28928 Opcml
Gm28928	Pde1a	1	0.981854838709677	29	NAhd	NA	NA	Gm28928 Pde1a
Gm28928	Pde4a	1	1	29	wtNA	NA	wt	Gm28928 Pde4a
Gm28928	Pde4d	1	1	29	NAhd	NA	NA	Gm28928 Pde4d
Gm28928	Pld5	0.979838709677419	1	29	wthd	NA	NA	Gm28928 Pld5
Gm28928	Prkg1	1	1	29	wtNA	NA	NA	Gm28928 Prkg1
Gm28928	Rasgrf2	0.891129032258065	1	29	wtNA	NA	NA	Gm28928 Rasgrf2
Gm28928	Sdk2	1	1	29	wtNA	NA	wt	Gm28928 Sdk2
Gm28928	Sgcd	1	1	29	NAhd	NA	NA	Gm28928 Sgcd
Gm28928	Sgcz	1	1	29	wthd	NA	NA	Gm28928 Sgcz
Gm28928	Shisa6	0.967741935483871	1	29	wthd	NA	NA	Gm28928 Shisa6
Gm28928	Sulf2	1	1	29	wtNA	NA	wt	Gm28928 Sulf2
Gm28928	Tmem108	0.995967741935484	1	29	NAhd	NA	NA	Gm28928 Tmem108
Gm28928	Tmem178	0.963709677419355	1	29	wtNA	NA	NA	Gm28928 Tmem178
Gm28928	Tmem178b	1	1	29	wtNA	NA	NA	Gm28928 Tmem178b
Gm28928	Tmtc2	0.907258064516129	1	29	NAhd	NA	NA	Gm28928 Tmtc2
Gm28928	Trpm3	0.939516129032258	1	29	NAhd	NA	NA	Gm28928 Trpm3
Gm28928	Unc13c	1	1	29	NAhd	NA	NA	Gm28928 Unc13c
Gm28928	Xylt1	0.983870967741935	1	29	wtNA	NA	wt	Gm28928 Xylt1
Gm28928	Zbtb20	0.987903225806452	0.983870967741935	29	wtNA	NA	NA	Gm28928 Zbtb20
Gm28928	Zfhx4	0.891129032258065	1	29	wtNA	NA	NA	Gm28928 Zfhx4
Gm30382	Adgrl2	1	0.57258064516129	1	wtNA	NA	NA	Gm30382 Adgrl2
Gm37459	4930419G24Rik	0.983870967741935	0.758736559139785	1	wtNA	NA	NA	Gm37459 4930419G24Rik
Gm42418	Cmss1	1	0.997983870967742	2	wthd	NA	NA	Gm42418 Cmss1
Gm42418	Mycbp	0.883064516129032	0.995295698924731	2	wtNA	NA	wt	Gm42418 Mycbp
Gm42705	Gm6260	0.995967741935484	0.981854838709677	1	wthd	NA	NA	Gm42705 Gm6260
Gm43948	Gm26911	0.911290322580645	0.979166666666667	1	wtNA	NA	NA	Gm43948 Gm26911
Gpc6	Brinp3	0.895161290322581	0.794354838709677	7	wtNA	NA	NA	Gpc6 Brinp3
Gpc6	Gabrg3	0.875	1	7	NAhd	NA	NA	Gpc6 Gabrg3
Gpc6	Gpc5	1	1	7	wthd	NA	NA	Gpc6 Gpc5
Gpc6	Lmo3	0.979838709677419	1	7	NAhd	NA	hd	Gpc6 Lmo3
Gpc6	Lrfn5	0.995967741935484	1	7	NAhd	NA	hd	Gpc6 Lrfn5
Gpc6	Ntm	0.895161290322581	1	7	NAhd	NA	NA	Gpc6 Ntm
Gpc6	Rgs6	0.931451612903226	0.869623655913978	7	wthd	NA	NA	Gpc6 Rgs6
Gpc6	Sema6d	0.971774193548387	1	7	wtNA	NA	wt	Gpc6 Sema6d
Gpc6	Thrb	1	1	7	wtNA	NA	wt	Gpc6 Thrb
Gpc6	Trpc6	0.94758064516129	1	7	wtNA	NA	wt	Gpc6 Trpc6
Gpc6	Unc5c	0.850806451612903	1	7	wtNA	NA	wt	Gpc6 Unc5c
Gpc6	Zfp804a	0.939516129032258	1	7	NAhd	NA	hd	Gpc6 Zfp804a
Gria3	Lrrtm4	0.866935483870968	0.521505376344086	1	wtNA	wt	NA	Gria3 Lrrtm4
Grik3	Cux2	0.911290322580645	0.512768817204301	3	wtNA	wt	NA	Grik3 Cux2
Grik3	Il1rapl1	0.94758064516129	1	3	wtNA	wt	NA	Grik3 Il1rapl1
Grik3	Nhsl2	0.915322580645161	1	3	wtNA	wt	wt	Grik3 Nhsl2
Grip1	Kcnab1	0.903225806451613	0.728494623655914	1	wtNA	NA	NA	Grip1 Kcnab1
Grm1	Rfx3	0.939516129032258	0.821236559139785	1	wtNA	wt	NA	Grm1 Rfx3
Grm3	Pak7	1	1	1	wtNA	NA	NA	Grm3 Pak7
Grm7	Lrrc4c	1	0.633064516129032	1	wtNA	NA	NA	Grm7 Lrrc4c
Grm8	Cacna2d3	0.883064516129032	0.995967741935484	5	NAhd	NA	NA	Grm8 Cacna2d3
Grm8	Kctd16	0.955645161290323	0.936827956989247	5	NAhd	NA	NA	Grm8 Kctd16
Grm8	Runx1t1	0.951612903225806	1	1	wtNA	NA	wt	Grm8 Runx1t1
Grm8	Tox	0.858870967741935	0.973118279569892	5	NAhd	NA	NA	Grm8 Tox
Grm8	Unc5d	0.971774193548387	0.520161290322581	5	NAhd	NA	NA	Grm8 Unc5d
Grm8	Zfp804b	0.919354838709677	1	5	NAhd	NA	NA	Grm8 Zfp804b
Hivep2	Gm26835	1	1	2	wthd	NA	NA	Hivep2 Gm26835
Hivep2	Pde10a	0.879032258064516	0.664650537634409	2	wtNA	NA	NA	Hivep2 Pde10a
Homer1	Nr4a2	1	0.762096774193548	1	NAhd	hd	NA	Homer1 Nr4a2
Hs3st4	Adcy2	1	0.997983870967742	68	NAhd	NA	hd	Hs3st4 Adcy2
Hs3st4	Alcam	1	0.997983870967742	68	NAhd	NA	hd	Hs3st4 Alcam
Hs3st4	C1ql3	1	1	67	wthd	NA	NA	Hs3st4 C1ql3
Hs3st4	Cacna2d3	1	0.995967741935484	67	wthd	NA	NA	Hs3st4 Cacna2d3
Hs3st4	Cacng3	1	1	67	wtNA	NA	wt	Hs3st4 Cacng3
Hs3st4	Camk4	0.963709677419355	1	68	NAhd	NA	NA	Hs3st4 Camk4
Hs3st4	Cdh7	1	0.995967741935484	67	wthd	NA	NA	Hs3st4 Cdh7
Hs3st4	Chsy3	1	0.997983870967742	68	NAhd	NA	hd	Hs3st4 Chsy3
Hs3st4	Cntnap4	0.858870967741935	1	67	wtNA	NA	wt	Hs3st4 Cntnap4
Hs3st4	Ctnna3	0.854838709677419	0.958333333333333	68	NAhd	NA	NA	Hs3st4 Ctnna3
Hs3st4	Ctnnd2	1	0.987903225806452	68	NAhd	NA	hd	Hs3st4 Ctnnd2
Hs3st4	D030068K23Rik	0.939516129032258	0.889784946236559	67	wtNA	NA	wt	Hs3st4 D030068K23Rik
Hs3st4	D8Ertd82e	0.995967741935484	1	67	wthd	NA	NA	Hs3st4 D8Ertd82e
Hs3st4	Dgkb	1	0.961693548387097	67	wthd	NA	NA	Hs3st4 Dgkb
Hs3st4	Dlc1	0.995967741935484	0.997983870967742	67	wtNA	NA	NA	Hs3st4 Dlc1
Hs3st4	Dlg2	0.92741935483871	1	67	wtNA	NA	NA	Hs3st4 Dlg2
Hs3st4	Dmd	0.850806451612903	0.98991935483871	68	NAhd	NA	NA	Hs3st4 Dmd
Hs3st4	Dscam	1	1	68	NAhd	NA	NA	Hs3st4 Dscam
Hs3st4	Dync1i1	0.951612903225806	1	68	NAhd	NA	hd	Hs3st4 Dync1i1
Hs3st4	Enpp2	0.975806451612903	1	67	wtNA	NA	NA	Hs3st4 Enpp2
Hs3st4	Fam155a	0.995967741935484	1	67	wthd	NA	NA	Hs3st4 Fam155a
Hs3st4	Foxp2	1	0.933467741935484	67	wthd	NA	NA	Hs3st4 Foxp2
Hs3st4	Frmpd4	1	0.743951612903226	68	NAhd	NA	NA	Hs3st4 Frmpd4
Hs3st4	Fstl4	0.94758064516129	0.989247311827957	68	NAhd	NA	NA	Hs3st4 Fstl4
Hs3st4	Gabra2	0.923387096774194	1	67	wthd	NA	NA	Hs3st4 Gabra2
Hs3st4	Galnt9	0.943548387096774	1	67	wthd	NA	NA	Hs3st4 Galnt9
Hs3st4	Garnl3	1	1	67	wthd	NA	NA	Hs3st4 Garnl3
Hs3st4	Gas7	0.991935483870968	0.877016129032258	67	wtNA	NA	wt	Hs3st4 Gas7
Hs3st4	Gdpd5	0.967741935483871	1	67	wtNA	NA	wt	Hs3st4 Gdpd5
Hs3st4	Gm27247	0.862903225806452	1	67	wtNA	NA	NA	Hs3st4 Gm27247
Hs3st4	Gm28928	1	0.971774193548387	67	wthd	NA	NA	Hs3st4 Gm28928
Hs3st4	Grid2	1	0.768145161290323	68	NAhd	NA	NA	Hs3st4 Grid2
Hs3st4	Grik1	0.995967741935484	1	67	wtNA	NA	NA	Hs3st4 Grik1
Hs3st4	Grm5	0.991935483870968	1	67	wtNA	NA	wt	Hs3st4 Grm5
Hs3st4	Grm7	1	0.993951612903226	67	wtNA	NA	NA	Hs3st4 Grm7
Hs3st4	Gtf2ird1	0.983870967741935	0.991935483870968	68	NAhd	NA	NA	Hs3st4 Gtf2ird1
Hs3st4	Hcn1	0.991935483870968	1	67	wtNA	NA	NA	Hs3st4 Hcn1
Hs3st4	Hs6st3	0.995967741935484	0.981854838709677	67	wthd	NA	NA	Hs3st4 Hs6st3
Hs3st4	Itga8	0.858870967741935	1	67	wtNA	NA	wt	Hs3st4 Itga8
Hs3st4	Kcnb2	0.995967741935484	1	67	wtNA	NA	wt	Hs3st4 Kcnb2
Hs3st4	Kcnip3	0.983870967741935	1	68	NAhd	NA	hd	Hs3st4 Kcnip3
Hs3st4	Kcnip4	1	1	67	wthd	NA	NA	Hs3st4 Kcnip4
Hs3st4	Kcnk2	1	1	67	wtNA	NA	wt	Hs3st4 Kcnk2
Hs3st4	Kcnq5	1	1	67	wthd	NA	NA	Hs3st4 Kcnq5
Hs3st4	Kcnt2	0.971774193548387	1	68	NAhd	NA	NA	Hs3st4 Kcnt2
Hs3st4	Kit	0.991935483870968	0.995967741935484	68	NAhd	NA	hd	Hs3st4 Kit
Hs3st4	Lingo2	1	1	67	wthd	NA	NA	Hs3st4 Lingo2
Hs3st4	Lrp1b	0.959677419354839	0.883736559139785	68	NAhd	NA	hd	Hs3st4 Lrp1b
Hs3st4	Lrrtm4	1	0.987903225806452	67	wthd	NA	NA	Hs3st4 Lrrtm4
Hs3st4	Man1a	0.951612903225806	0.997983870967742	67	wtNA	NA	wt	Hs3st4 Man1a
Hs3st4	Mapk4	1	1	67	wthd	NA	NA	Hs3st4 Mapk4
Hs3st4	Mgat4c	1	0.747983870967742	68	NAhd	NA	hd	Hs3st4 Mgat4c
Hs3st4	Mgat5	0.987903225806452	1	67	wthd	NA	NA	Hs3st4 Mgat5
Hs3st4	Nav2	0.915322580645161	1	67	wthd	NA	NA	Hs3st4 Nav2
Hs3st4	Nebl	0.967741935483871	1	67	wthd	NA	NA	Hs3st4 Nebl
Hs3st4	Nr3c2	0.891129032258065	0.993279569892473	68	NAhd	NA	hd	Hs3st4 Nr3c2
Hs3st4	Nrg3	1	0.997983870967742	67	wtNA	NA	NA	Hs3st4 Nrg3
Hs3st4	Ntm	1	1	67	wtNA	NA	NA	Hs3st4 Ntm
Hs3st4	Ntng2	0.971774193548387	0.993951612903226	67	wthd	NA	NA	Hs3st4 Ntng2
Hs3st4	Pbx1	1	0.598790322580645	68	NAhd	NA	hd	Hs3st4 Pbx1
Hs3st4	Pcdh9	0.975806451612903	0.973118279569892	68	NAhd	NA	NA	Hs3st4 Pcdh9
Hs3st4	Pde1a	0.854838709677419	0.993951612903226	67	wtNA	NA	NA	Hs3st4 Pde1a
Hs3st4	Plcl1	0.995967741935484	1	68	NAhd	NA	NA	Hs3st4 Plcl1
Hs3st4	Plxna2	0.971774193548387	1	67	wtNA	NA	wt	Hs3st4 Plxna2
Hs3st4	Ptprd	0.943548387096774	1	67	wthd	NA	NA	Hs3st4 Ptprd
Hs3st4	Ptprk	1	1	67	wthd	NA	NA	Hs3st4 Ptprk
Hs3st4	Rai14	1	0.997983870967742	67	wthd	NA	NA	Hs3st4 Rai14
Hs3st4	Rapgef5	0.963709677419355	1	68	NAhd	NA	hd	Hs3st4 Rapgef5
Hs3st4	Rell1	1	0.895161290322581	67	wthd	NA	NA	Hs3st4 Rell1
Hs3st4	Rimbp2	0.951612903225806	1	67	wthd	NA	NA	Hs3st4 Rimbp2
Hs3st4	Rims1	0.983870967741935	0.935483870967742	67	wtNA	NA	NA	Hs3st4 Rims1
Hs3st4	Rnf152	0.995967741935484	0.995967741935484	67	wtNA	NA	wt	Hs3st4 Rnf152
Hs3st4	Robo3	0.975806451612903	1	68	NAhd	NA	hd	Hs3st4 Robo3
Hs3st4	Rora	0.850806451612903	0.995967741935484	67	wtNA	NA	NA	Hs3st4 Rora
Hs3st4	Rph3a	0.963709677419355	1	68	NAhd	NA	hd	Hs3st4 Rph3a
Hs3st4	Sel1l3	1	1	68	NAhd	NA	NA	Hs3st4 Sel1l3
Hs3st4	Sema5a	1	1	67	wthd	NA	NA	Hs3st4 Sema5a
Hs3st4	Sema5b	1	0.828629032258065	68	NAhd	NA	NA	Hs3st4 Sema5b
Hs3st4	Slc16a10	0.979838709677419	0.995967741935484	67	wthd	NA	NA	Hs3st4 Slc16a10
Hs3st4	Slc1a2	0.959677419354839	0.946908602150538	67	wthd	NA	NA	Hs3st4 Slc1a2
Hs3st4	Slc24a4	0.995967741935484	1	67	wthd	NA	NA	Hs3st4 Slc24a4
Hs3st4	Slc35f1	0.995967741935484	1	68	NAhd	NA	NA	Hs3st4 Slc35f1
Hs3st4	Slc35f4	1	1	67	wtNA	NA	NA	Hs3st4 Slc35f4
Hs3st4	Slc9a9	1	0.975806451612903	68	NAhd	NA	NA	Hs3st4 Slc9a9
Hs3st4	Slit3	1	0.997983870967742	67	wthd	NA	NA	Hs3st4 Slit3
Hs3st4	Smad3	0.919354838709677	1	67	wthd	NA	NA	Hs3st4 Smad3
Hs3st4	Sorbs2	0.850806451612903	0.98991935483871	68	NAhd	NA	NA	Hs3st4 Sorbs2
Hs3st4	Sorcs1	1	0.808467741935484	68	NAhd	NA	NA	Hs3st4 Sorcs1
Hs3st4	Sorcs3	1	0.991935483870968	67	wtNA	NA	NA	Hs3st4 Sorcs3
Hs3st4	Spon1	0.92741935483871	0.993951612903226	68	NAhd	NA	hd	Hs3st4 Spon1
Hs3st4	Srgap3	1	0.9375	67	wtNA	NA	wt	Hs3st4 Srgap3
Hs3st4	Srrm4	0.899193548387097	1	67	wtNA	NA	wt	Hs3st4 Srrm4
Hs3st4	Stard8	0.92741935483871	1	67	wtNA	NA	wt	Hs3st4 Stard8
Hs3st4	Stxbp6	1	1	67	wtNA	NA	NA	Hs3st4 Stxbp6
Hs3st4	Syn3	0.931451612903226	1	67	wtNA	NA	NA	Hs3st4 Syn3
Hs3st4	Tenm4	0.911290322580645	0.983870967741935	67	wthd	NA	NA	Hs3st4 Tenm4
Hs3st4	Tmem178	1	1	67	wtNA	NA	NA	Hs3st4 Tmem178
Hs3st4	Trpc5	0.943548387096774	1	68	NAhd	NA	NA	Hs3st4 Trpc5
Hs3st4	Xkr4	0.991935483870968	1	68	NAhd	NA	NA	Hs3st4 Xkr4
Hs3st4	Zcchc16	1	0.98991935483871	67	wthd	NA	NA	Hs3st4 Zcchc16
Hs3st4	Zfpm2	0.963709677419355	0.983198924731183	67	wtNA	NA	NA	Hs3st4 Zfpm2
Hs6st3	A330008L17Rik	0.987903225806452	1	11	wtNA	NA	NA	Hs6st3 A330008L17Rik
Hs6st3	Cacna1e	0.887096774193548	1	13	NAhd	NA	NA	Hs6st3 Cacna1e
Hs6st3	Cntn4	1	0.997983870967742	11	wtNA	NA	NA	Hs6st3 Cntn4
Hs6st3	Fat3	0.987903225806452	1	11	wtNA	NA	wt	Hs6st3 Fat3
Hs6st3	Frmd5	1	1	11	wthd	NA	NA	Hs6st3 Frmd5
Hs6st3	Gm20752	0.931451612903226	0.997983870967742	11	wtNA	NA	NA	Hs6st3 Gm20752
Hs6st3	Grm7	0.92741935483871	0.862903225806452	11	wthd	NA	NA	Hs6st3 Grm7
Hs6st3	Large	0.899193548387097	1	11	wtNA	NA	wt	Hs6st3 Large
Hs6st3	Nell1	0.983870967741935	0.995967741935484	11	wtNA	NA	NA	Hs6st3 Nell1
Hs6st3	Pde1a	1	0.971774193548387	11	wthd	NA	NA	Hs6st3 Pde1a
Hs6st3	Pde8b	1	1	13	NAhd	NA	NA	Hs6st3 Pde8b
Hs6st3	Pdzrn3	0.919354838709677	0.896505376344086	11	wtNA	NA	NA	Hs6st3 Pdzrn3
Hs6st3	Pdzrn4	0.995967741935484	1	13	NAhd	NA	hd	Hs6st3 Pdzrn4
Hs6st3	Prkcg	0.854838709677419	1	13	NAhd	NA	NA	Hs6st3 Prkcg
Hs6st3	Prr16	0.951612903225806	1	13	NAhd	NA	NA	Hs6st3 Prr16
Hs6st3	R3hdm1	0.94758064516129	1	13	NAhd	NA	NA	Hs6st3 R3hdm1
Hs6st3	Rora	0.995967741935484	0.997983870967742	11	wthd	NA	NA	Hs6st3 Rora
Hs6st3	Rorb	1	1	13	NAhd	NA	NA	Hs6st3 Rorb
Hs6st3	Slc2a13	0.983870967741935	1	13	NAhd	NA	NA	Hs6st3 Slc2a13
Hs6st3	Tnr	1	1	13	NAhd	NA	hd	Hs6st3 Tnr
Igsf11	Lmo7	0.939516129032258	1	3	wtNA	NA	NA	Igsf11 Lmo7
Igsf11	Pkig	0.879032258064516	1	3	wtNA	NA	NA	Igsf11 Pkig
Igsf11	Rfx3	0.971774193548387	1	2	NAhd	NA	NA	Igsf11 Rfx3
Igsf11	Rgl1	0.975806451612903	1	3	wthd	NA	NA	Igsf11 Rgl1
Il1rapl1	Galnt14	0.959677419354839	0.987903225806452	1	NAhd	NA	NA	Il1rapl1 Galnt14
Il1rapl2	Agbl4	0.987903225806452	1	7	NAhd	hd	NA	Il1rapl2 Agbl4
Il1rapl2	Cemip	0.895161290322581	1	7	NAhd	hd	NA	Il1rapl2 Cemip
Il1rapl2	Elavl2	0.967741935483871	1	7	NAhd	hd	NA	Il1rapl2 Elavl2
Il1rapl2	Lingo2	0.987903225806452	0.671370967741935	7	NAhd	hd	NA	Il1rapl2 Lingo2
Il1rapl2	Ntrk3	0.866935483870968	0.991935483870968	7	NAhd	hd	NA	Il1rapl2 Ntrk3
Il1rapl2	Slc24a3	1	0.963709677419355	7	NAhd	hd	hd	Il1rapl2 Slc24a3
Il1rapl2	Sorcs3	0.854838709677419	0.94489247311828	7	NAhd	hd	NA	Il1rapl2 Sorcs3
Inpp4b	4930555F03Rik	0.866935483870968	1	1	NAhd	hd	NA	Inpp4b 4930555F03Rik
Kcnab1	A330015K06Rik	1	1	3	wthd	NA	NA	Kcnab1 A330015K06Rik
Kcnab1	Cabp1	0.92741935483871	1	3	wtNA	NA	wt	Kcnab1 Cabp1
Kcnab1	Smyd3	0.967741935483871	0.978494623655914	3	wtNA	NA	wt	Kcnab1 Smyd3
Kcnb2	Cdh8	0.875	1	2	wtNA	wt	NA	Kcnb2 Cdh8
Kcnb2	Pcdh15	0.899193548387097	0.948924731182796	2	wtNA	wt	NA	Kcnb2 Pcdh15
Kcnip4	Plcl1	0.951612903225806	1	1	wtNA	NA	NA	Kcnip4 Plcl1
Kcnq5	Mkx	0.983870967741935	1	1	wtNA	NA	wt	Kcnq5 Mkx
Kctd16	2900055J20Rik	1	1	7	wthd	NA	NA	Kctd16 2900055J20Rik
Kctd16	Cadm2	0.971774193548387	0.98252688172043	5	NAhd	NA	NA	Kctd16 Cadm2
Kctd16	Camk2a	0.987903225806452	0.997983870967742	5	NAhd	NA	hd	Kctd16 Camk2a
Kctd16	Elavl2	0.919354838709677	1	7	wtNA	NA	NA	Kctd16 Elavl2
Kctd16	Epha4	0.879032258064516	0.936827956989247	7	wtNA	NA	wt	Kctd16 Epha4
Kctd16	Fstl4	0.995967741935484	0.737903225806452	5	NAhd	NA	NA	Kctd16 Fstl4
Kctd16	Glra2	0.866935483870968	0.997983870967742	5	NAhd	NA	hd	Kctd16 Glra2
Kctd16	Grm8	0.987903225806452	0.94758064516129	7	wtNA	NA	NA	Kctd16 Grm8
Kctd16	Ntng1	0.866935483870968	0.544354838709677	7	wtNA	NA	NA	Kctd16 Ntng1
Kctd16	Sorbs2	0.951612903225806	1	7	wtNA	NA	NA	Kctd16 Sorbs2
Kctd16	Tmem163	0.911290322580645	0.995967741935484	7	wtNA	NA	NA	Kctd16 Tmem163
Khdrbs3	Etv5	0.915322580645161	0.997983870967742	1	wtNA	NA	wt	Khdrbs3 Etv5
Kirrel3	Dpp6	0.875	1	3	wtNA	NA	NA	Kirrel3 Dpp6
Kirrel3	Man2a1	0.943548387096774	1	3	wtNA	NA	wt	Kirrel3 Man2a1
Kirrel3	Sorcs2	0.943548387096774	1	3	wtNA	NA	NA	Kirrel3 Sorcs2
Ldb2	Gm43507	1	1	2	wthd	NA	NA	Ldb2 Gm43507
Ldb2	Tox	1	1	2	wthd	NA	NA	Ldb2 Tox
Lingo2	2700069I18Rik	1	0.997983870967742	42	NAhd	NA	hd	Lingo2 2700069I18Rik
Lingo2	A230006K03Rik	0.923387096774194	1	42	NAhd	NA	hd	Lingo2 A230006K03Rik
Lingo2	A830018L16Rik	1	1	42	NAhd	NA	NA	Lingo2 A830018L16Rik
Lingo2	Antxr2	0.899193548387097	0.969086021505376	42	NAhd	NA	hd	Lingo2 Antxr2
Lingo2	Arhgap26	0.995967741935484	1	42	NAhd	NA	NA	Lingo2 Arhgap26
Lingo2	Auts2	0.92741935483871	1	42	NAhd	NA	NA	Lingo2 Auts2
Lingo2	Calb1	1	0.995967741935484	42	NAhd	NA	NA	Lingo2 Calb1
Lingo2	Csmd1	0.959677419354839	1	42	NAhd	NA	hd	Lingo2 Csmd1
Lingo2	Cux2	1	1	42	NAhd	NA	NA	Lingo2 Cux2
Lingo2	Dlc1	0.951612903225806	1	42	NAhd	NA	NA	Lingo2 Dlc1
Lingo2	Dmd	0.879032258064516	1	4	wtNA	NA	NA	Lingo2 Dmd
Lingo2	Enpp2	0.991935483870968	1	42	NAhd	NA	NA	Lingo2 Enpp2
Lingo2	Epha6	1	1	42	NAhd	NA	NA	Lingo2 Epha6
Lingo2	Fam19a2	0.875	0.95497311827957	42	NAhd	NA	NA	Lingo2 Fam19a2
Lingo2	Gm16599	0.979838709677419	1	42	NAhd	NA	NA	Lingo2 Gm16599
Lingo2	Gm20754	1	0.945564516129032	42	NAhd	NA	NA	Lingo2 Gm20754
Lingo2	Gm27247	1	1	42	NAhd	NA	NA	Lingo2 Gm27247
Lingo2	Gm28928	1	0.981854838709677	42	NAhd	NA	NA	Lingo2 Gm28928
Lingo2	Htr1f	1	1	42	NAhd	NA	hd	Lingo2 Htr1f
Lingo2	Igsf11	1	1	42	NAhd	NA	NA	Lingo2 Igsf11
Lingo2	Il1rapl1	1	1	42	NAhd	NA	NA	Lingo2 Il1rapl1
Lingo2	Itga5	0.971774193548387	1	4	wtNA	NA	wt	Lingo2 Itga5
Lingo2	Ncam2	0.923387096774194	0.981182795698925	42	NAhd	NA	NA	Lingo2 Ncam2
Lingo2	Nfia	1	1	42	NAhd	NA	NA	Lingo2 Nfia
Lingo2	Nfib	1	1	42	NAhd	NA	NA	Lingo2 Nfib
Lingo2	Nlk	0.939516129032258	1	42	NAhd	NA	NA	Lingo2 Nlk
Lingo2	Npas3	0.854838709677419	1	42	NAhd	NA	hd	Lingo2 Npas3
Lingo2	Parm1	0.891129032258065	0.995967741935484	42	NAhd	NA	hd	Lingo2 Parm1
Lingo2	Pde4d	0.899193548387097	1	4	wtNA	NA	NA	Lingo2 Pde4d
Lingo2	Pdzrn3	1	0.858870967741935	42	NAhd	NA	NA	Lingo2 Pdzrn3
Lingo2	Pparg	0.983870967741935	1	42	NAhd	NA	hd	Lingo2 Pparg
Lingo2	Prkca	0.903225806451613	1	42	NAhd	NA	NA	Lingo2 Prkca
Lingo2	Prkcb	1	0.997983870967742	42	NAhd	NA	hd	Lingo2 Prkcb
Lingo2	Ptprt	1	1	4	wthd	NA	NA	Lingo2 Ptprt
Lingo2	Rasgrf2	1	1	42	NAhd	NA	NA	Lingo2 Rasgrf2
Lingo2	Sema3e	1	1	42	NAhd	NA	NA	Lingo2 Sema3e
Lingo2	Slit1	0.891129032258065	1	42	NAhd	NA	hd	Lingo2 Slit1
Lingo2	Sncaip	1	0.993951612903226	42	NAhd	NA	hd	Lingo2 Sncaip
Lingo2	Sox5	0.987903225806452	1	42	NAhd	NA	NA	Lingo2 Sox5
Lingo2	Tenm1	1	1	42	NAhd	NA	NA	Lingo2 Tenm1
Lingo2	Tmem178	0.92741935483871	1	42	NAhd	NA	NA	Lingo2 Tmem178
Lingo2	Tmem178b	1	0.981854838709677	42	NAhd	NA	NA	Lingo2 Tmem178b
Lingo2	Trps1	0.995967741935484	1	42	NAhd	NA	NA	Lingo2 Trps1
Lingo2	Unc5d	0.883064516129032	0.990591397849462	42	NAhd	NA	NA	Lingo2 Unc5d
Lingo2	Zfhx4	1	0.997983870967742	42	NAhd	NA	NA	Lingo2 Zfhx4
Lrrc4c	4930445B16Rik	1	1	2	wthd	NA	NA	Lrrc4c 4930445B16Rik
Lrrc4c	Chrm3	1	0.754032258064516	2	wtNA	NA	wt	Lrrc4c Chrm3
Lrrtm4	Pip5k1b	0.875	1	3	wtNA	NA	wt	Lrrtm4 Pip5k1b
Lrrtm4	Slit3	1	0.993951612903226	3	wthd	NA	NA	Lrrtm4 Slit3
Lrrtm4	Spock1	0.887096774193548	1	3	wtNA	NA	wt	Lrrtm4 Spock1
Lsamp	Csmd3	1	0.961693548387097	1	wthd	NA	NA	Lsamp Csmd3
Malat1	Grm5	0.875	1	2	wtNA	NA	wt	Malat1 Grm5
Malat1	Lyzl4	0.907258064516129	1	2	NAhd	NA	NA	Malat1 Lyzl4
Malat1	Ptprn2	0.987903225806452	1	2	wtNA	NA	NA	Malat1 Ptprn2
Malat1	Serinc2	0.951612903225806	0.763440860215054	2	NAhd	NA	hd	Malat1 Serinc2
Mast4	Tmem196	0.883064516129032	1	1	wtNA	wt	NA	Mast4 Tmem196
Mdm4	Rgs20	0.931451612903226	0.67002688172043	1	wtNA	NA	NA	Mdm4 Rgs20
Meg3	4930402H24Rik	0.911290322580645	0.976478494623656	16	wtNA	NA	wt	Meg3 4930402H24Rik
Meg3	A930011G23Rik	0.935483870967742	1	16	wtNA	NA	NA	Meg3 A930011G23Rik
Meg3	Apba2	0.907258064516129	1	16	wtNA	NA	wt	Meg3 Apba2
Meg3	Arhgef25	0.951612903225806	0.96505376344086	16	wthd	NA	NA	Meg3 Arhgef25
Meg3	Emid1	0.983870967741935	1	5	NAhd	NA	NA	Meg3 Emid1
Meg3	Frmd4b	1	0.923387096774194	16	wtNA	NA	NA	Meg3 Frmd4b
Meg3	Gabbr2	0.858870967741935	0.975806451612903	16	wtNA	NA	NA	Meg3 Gabbr2
Meg3	Galnt13	0.883064516129032	0.983870967741935	16	wtNA	NA	wt	Meg3 Galnt13
Meg3	Gm13944	0.858870967741935	1	16	wtNA	NA	NA	Meg3 Gm13944
Meg3	Mirg	0.995967741935484	0.975806451612903	16	wtNA	NA	wt	Meg3 Mirg
Meg3	Pard3	0.979838709677419	0.960349462365591	16	wthd	NA	NA	Meg3 Pard3
Meg3	Slc17a7	0.94758064516129	0.957661290322581	16	wtNA	NA	NA	Meg3 Slc17a7
Meg3	Snhg11	1	0.616935483870968	16	wthd	NA	NA	Meg3 Snhg11
Meg3	Spata7	0.879032258064516	1	16	wtNA	NA	wt	Meg3 Spata7
Meg3	Sv2b	0.923387096774194	0.997983870967742	16	wtNA	NA	wt	Meg3 Sv2b
Meg3	Trim9	0.870967741935484	0.940188172043011	16	wtNA	NA	wt	Meg3 Trim9
Meg3	Xkr6	0.991935483870968	0.993951612903226	16	wthd	NA	NA	Meg3 Xkr6
Meis2	Dab1	0.963709677419355	0.955645161290323	3	NAhd	NA	NA	Meis2 Dab1
Meis2	Erbb4	0.959677419354839	0.945564516129032	3	NAhd	NA	NA	Meis2 Erbb4
Meis2	Il1rapl2	0.935483870967742	0.9375	3	NAhd	NA	hd	Meis2 Il1rapl2
Meis2	March1	0.955645161290323	1	1	wtNA	NA	NA	Meis2 March1
Mgat4c	Meis2	0.971774193548387	0.746639784946237	1	NAhd	hd	NA	Mgat4c Meis2
Ndst4	Abi3bp	1	1	11	wtNA	NA	wt	Ndst4 Abi3bp
Ndst4	Crtac1	0.983870967741935	1	11	wtNA	NA	wt	Ndst4 Crtac1
Ndst4	Ctnna3	0.883064516129032	0.995967741935484	11	wtNA	NA	NA	Ndst4 Ctnna3
Ndst4	Dok6	0.995967741935484	1	11	wtNA	NA	wt	Ndst4 Dok6
Ndst4	E130114P18Rik	0.995967741935484	0.995967741935484	11	wtNA	NA	NA	Ndst4 E130114P18Rik
Ndst4	Emid1	1	1	11	wtNA	NA	NA	Ndst4 Emid1
Ndst4	Ephb2	0.887096774193548	1	11	wtNA	NA	wt	Ndst4 Ephb2
Ndst4	Ltbp1	0.850806451612903	1	11	wtNA	NA	wt	Ndst4 Ltbp1
Ndst4	Satb2	0.887096774193548	0.68010752688172	11	wtNA	NA	NA	Ndst4 Satb2
Ndst4	Tenm3	0.862903225806452	1	11	wtNA	NA	NA	Ndst4 Tenm3
Ndst4	Trps1	0.92741935483871	1	1	NAhd	NA	NA	Ndst4 Trps1
Ndst4	Xkr4	0.883064516129032	1	11	wtNA	NA	NA	Ndst4 Xkr4
Necab3	1700003F12Rik	1	0.991935483870968	1	wthd	NA	NA	Necab3 1700003F12Rik
Nell1	Astn2	0.915322580645161	0.995967741935484	2	wtNA	NA	NA	Nell1 Astn2
Nell1	Nell1os	1	0.997983870967742	2	wthd	NA	NA	Nell1 Nell1os
Nfia	Caln1	0.979838709677419	1	8	NAhd	NA	NA	Nfia Caln1
Nfia	Cpne4	0.983870967741935	1	8	NAhd	NA	NA	Nfia Cpne4
Nfia	E130114P18Rik	1	0.608870967741935	5	wthd	NA	NA	Nfia E130114P18Rik
Nfia	Ephb1	0.983870967741935	1	8	NAhd	NA	NA	Nfia Ephb1
Nfia	Ext1	0.983870967741935	1	5	wtNA	NA	NA	Nfia Ext1
Nfia	Grik4	0.967741935483871	1	8	NAhd	NA	NA	Nfia Grik4
Nfia	Mctp1	0.923387096774194	1	5	wtNA	NA	wt	Nfia Mctp1
Nfia	Neto1	0.963709677419355	1	8	NAhd	NA	NA	Nfia Neto1
Nfia	Nin	0.987903225806452	1	8	NAhd	NA	hd	Nfia Nin
Nfia	Nlk	0.915322580645161	1	5	wtNA	NA	NA	Nfia Nlk
Nfia	Tmem200a	0.987903225806452	1	8	NAhd	NA	hd	Nfia Tmem200a
Nfia	Xylt1	0.959677419354839	1	5	wtNA	NA	wt	Nfia Xylt1
Nfib	Crym	1	1	3	wtNA	NA	wt	Nfib Crym
Nfib	Nfia	1	1	3	wtNA	NA	NA	Nfib Nfia
Nfib	Tmtc2	0.895161290322581	1	3	wtNA	NA	NA	Nfib Tmtc2
Nhs	Celf5	0.955645161290323	0.549731182795699	1	NAhd	NA	hd	Nhs Celf5
Nkain2	Afap1l1	0.935483870967742	1	3	wtNA	wt	wt	Nkain2 Afap1l1
Nkain2	Grik2	0.903225806451613	1	3	wtNA	wt	NA	Nkain2 Grik2
Nkain2	Malat1	0.955645161290323	1	3	wtNA	wt	NA	Nkain2 Malat1
Nr4a2	Rxfp1	0.875	0.997983870967742	1	wtNA	NA	wt	Nr4a2 Rxfp1
Nrg3os	Gm20642	1	0.901209677419355	2	wthd	NA	NA	Nrg3os Gm20642
Nrg3os	Nrg3	1	0.951612903225806	2	wtNA	NA	NA	Nrg3os Nrg3
Nrxn3	Lcp1	0.915322580645161	0.850806451612903	2	wtNA	wt	wt	Nrxn3 Lcp1
Nrxn3	Pcdh11x	0.850806451612903	1	2	wtNA	wt	wt	Nrxn3 Pcdh11x
Ntng1	Ablim1	0.879032258064516	1	6	wtNA	NA	wt	Ntng1 Ablim1
Ntng1	Erc2	0.919354838709677	1	4	NAhd	NA	NA	Ntng1 Erc2
Ntng1	Lpp	0.850806451612903	1	6	wtNA	NA	NA	Ntng1 Lpp
Ntng1	Prickle2	0.931451612903226	0.989247311827957	6	wtNA	NA	NA	Ntng1 Prickle2
Ntng1	Rbfox1	1	0.637096774193548	4	NAhd	NA	NA	Ntng1 Rbfox1
Ntng1	Ryr2	0.887096774193548	1	6	wthd	NA	NA	Ntng1 Ryr2
Ntng1	Sox5os4	0.955645161290323	1	6	wtNA	NA	NA	Ntng1 Sox5os4
Ntng1	Tanc1	0.955645161290323	1	4	NAhd	NA	NA	Ntng1 Tanc1
Ntng1	Zeb2	0.979838709677419	1	6	wtNA	NA	wt	Ntng1 Zeb2
Ntng2	Galnt14	0.891129032258065	0.995967741935484	10	wtNA	NA	NA	Ntng2 Galnt14
Ntng2	Gfra1	0.883064516129032	1	10	wtNA	NA	NA	Ntng2 Gfra1
Ntng2	Gnb4	0.987903225806452	0.997983870967742	10	wtNA	NA	NA	Ntng2 Gnb4
Ntng2	Mgat5	1	0.981854838709677	10	wtNA	NA	NA	Ntng2 Mgat5
Ntng2	Oprk1	1	1	10	wtNA	NA	NA	Ntng2 Oprk1
Ntng2	Ptprt	0.875	0.995967741935484	10	wtNA	NA	NA	Ntng2 Ptprt
Ntng2	Rasa3	0.854838709677419	1	10	wtNA	NA	wt	Ntng2 Rasa3
Ntng2	Rims2	0.866935483870968	1	10	wtNA	NA	NA	Ntng2 Rims2
Ntng2	RP23-231J2.1	0.866935483870968	1	10	wtNA	NA	wt	Ntng2 RP23-231J2.1
Ntng2	Tmem163	0.895161290322581	0.985887096774194	10	wtNA	NA	NA	Ntng2 Tmem163
Ntrk3	Sipa1l1	0.935483870967742	0.990591397849462	1	wtNA	NA	wt	Ntrk3 Sipa1l1
Nxph1	Dkk2	0.939516129032258	1	3	wtNA	wt	wt	Nxph1 Dkk2
Nxph1	Lcp1	0.883064516129032	1	3	wtNA	wt	wt	Nxph1 Lcp1
Nxph1	Tbc1d23	0.995967741935484	1	3	wtNA	wt	wt	Nxph1 Tbc1d23
Olfm3	Col24a1	0.991935483870968	1	1	wtNA	wt	wt	Olfm3 Col24a1
Oprm1	Ipcef1	1	0.997983870967742	1	wthd	NA	NA	Oprm1 Ipcef1
Pard3	Dlg2	0.935483870967742	0.995967741935484	2	wtNA	NA	NA	Pard3 Dlg2
Pard3	Scaper	0.854838709677419	0.981854838709677	2	wtNA	NA	NA	Pard3 Scaper
Pcdh15	Gria4	0.987903225806452	0.987903225806452	1	NAhd	NA	NA	Pcdh15 Gria4
Pcdh9	4921534H16Rik	0.995967741935484	1	24	NAhd	NA	NA	Pcdh9 4921534H16Rik
Pcdh9	A230006K03Rik	1	1	24	NAhd	NA	hd	Pcdh9 A230006K03Rik
Pcdh9	Arpp21	0.899193548387097	0.995967741935484	24	NAhd	NA	NA	Pcdh9 Arpp21
Pcdh9	Astn2	0.891129032258065	0.788978494623656	24	NAhd	NA	NA	Pcdh9 Astn2
Pcdh9	Cacna1h	0.955645161290323	1	6	wthd	NA	NA	Pcdh9 Cacna1h
Pcdh9	Cacnb4	1	1	24	NAhd	NA	NA	Pcdh9 Cacnb4
Pcdh9	Cadps	0.991935483870968	0.991935483870968	24	NAhd	NA	NA	Pcdh9 Cadps
Pcdh9	Ccdc88c	0.883064516129032	1	24	NAhd	NA	hd	Pcdh9 Ccdc88c
Pcdh9	Dagla	0.931451612903226	1	6	wtNA	NA	wt	Pcdh9 Dagla
Pcdh9	Fgf14	1	1	24	NAhd	NA	hd	Pcdh9 Fgf14
Pcdh9	Gm16083	0.975806451612903	1	24	NAhd	NA	hd	Pcdh9 Gm16083
Pcdh9	Hecw2	0.987903225806452	1	24	NAhd	NA	hd	Pcdh9 Hecw2
Pcdh9	Kcnma1	1	0.997983870967742	24	NAhd	NA	hd	Pcdh9 Kcnma1
Pcdh9	Kcnq5	0.943548387096774	0.939516129032258	24	NAhd	NA	NA	Pcdh9 Kcnq5
Pcdh9	Kirrel3	0.979838709677419	0.668010752688172	24	NAhd	NA	NA	Pcdh9 Kirrel3
Pcdh9	Nav3	1	0.997983870967742	24	NAhd	NA	NA	Pcdh9 Nav3
Pcdh9	Ngef	0.987903225806452	1	24	NAhd	NA	hd	Pcdh9 Ngef
Pcdh9	Pak7	0.854838709677419	1	24	NAhd	NA	NA	Pcdh9 Pak7
Pcdh9	Phactr1	1	0.997983870967742	6	wthd	NA	NA	Pcdh9 Phactr1
Pcdh9	Rhbdl3	0.995967741935484	0.991935483870968	24	NAhd	NA	hd	Pcdh9 Rhbdl3
Pcdh9	Rims1	0.987903225806452	1	24	NAhd	NA	NA	Pcdh9 Rims1
Pcdh9	Rims2	0.975806451612903	1	24	NAhd	NA	NA	Pcdh9 Rims2
Pcdh9	Syt1	0.995967741935484	1	6	wthd	NA	NA	Pcdh9 Syt1
Pcdh9	Syt17	0.935483870967742	1	24	NAhd	NA	hd	Pcdh9 Syt17
Pcdh9	Trhde	0.92741935483871	1	6	wtNA	NA	NA	Pcdh9 Trhde
Pcdh9	Trpc7	0.979838709677419	1	6	wtNA	NA	wt	Pcdh9 Trpc7
Pcdh9	Ube2e2	0.939516129032258	0.993951612903226	24	NAhd	NA	hd	Pcdh9 Ube2e2
Pcsk2	Pcsk2os2	0.915322580645161	1	1	wtNA	wt	NA	Pcsk2 Pcsk2os2
Pde10a	Malat1	0.887096774193548	0.728494623655914	2	NAhd	NA	NA	Pde10a Malat1
Pde10a	Maml3	0.975806451612903	0.896505376344086	2	wtNA	NA	NA	Pde10a Maml3
Pde10a	Ntrk2	1	1	2	wthd	NA	NA	Pde10a Ntrk2
Pde1a	Gm28928	1	0.979838709677419	2	wtNA	NA	NA	Pde1a Gm28928
Pde1a	Prkag2	1	1	2	wtNA	NA	wt	Pde1a Prkag2
Pdzrn3	Adrbk2	0.979838709677419	1	22	wtNA	NA	wt	Pdzrn3 Adrbk2
Pdzrn3	Brinp1	0.963709677419355	1	22	wtNA	NA	wt	Pdzrn3 Brinp1
Pdzrn3	Cdh12	1	0.997983870967742	22	wthd	NA	NA	Pdzrn3 Cdh12
Pdzrn3	Cit	1	0.997983870967742	22	wtNA	NA	wt	Pdzrn3 Cit
Pdzrn3	Col26a1	0.931451612903226	1	22	wtNA	NA	wt	Pdzrn3 Col26a1
Pdzrn3	Fam19a2	0.907258064516129	1	22	wtNA	NA	NA	Pdzrn3 Fam19a2
Pdzrn3	Fstl4	0.931451612903226	0.995967741935484	22	wtNA	NA	NA	Pdzrn3 Fstl4
Pdzrn3	Gm26911	1	0.981854838709677	22	wthd	NA	NA	Pdzrn3 Gm26911
Pdzrn3	Gm43948	1	0.967741935483871	22	wthd	NA	NA	Pdzrn3 Gm43948
Pdzrn3	Gria1	0.939516129032258	1	22	wtNA	NA	NA	Pdzrn3 Gria1
Pdzrn3	Hs6st3	0.995967741935484	0.532930107526882	6	NAhd	NA	NA	Pdzrn3 Hs6st3
Pdzrn3	Mef2c	0.854838709677419	1	22	wtNA	NA	wt	Pdzrn3 Mef2c
Pdzrn3	Mlip	0.995967741935484	1	22	wtNA	NA	wt	Pdzrn3 Mlip
Pdzrn3	Ncam2	0.967741935483871	1	22	wtNA	NA	NA	Pdzrn3 Ncam2
Pdzrn3	Neto1	0.895161290322581	1	22	wtNA	NA	NA	Pdzrn3 Neto1
Pdzrn3	Nlk	1	1	22	wtNA	NA	NA	Pdzrn3 Nlk
Pdzrn3	Pcsk5	0.891129032258065	1	6	NAhd	NA	hd	Pdzrn3 Pcsk5
Pdzrn3	Ptprd	0.907258064516129	0.693548387096774	6	NAhd	NA	NA	Pdzrn3 Ptprd
Pdzrn3	Ptpru	0.979838709677419	1	22	wtNA	NA	wt	Pdzrn3 Ptpru
Pdzrn3	Rgs7	0.959677419354839	1	22	wtNA	NA	NA	Pdzrn3 Rgs7
Pdzrn3	Rnf144a	0.870967741935484	1	22	wtNA	NA	wt	Pdzrn3 Rnf144a
Pdzrn3	Sdk2	0.951612903225806	1	22	wtNA	NA	wt	Pdzrn3 Sdk2
Pdzrn3	Sema5a	0.94758064516129	1	22	wtNA	NA	NA	Pdzrn3 Sema5a
Pdzrn3	Sema5b	0.911290322580645	1	22	wtNA	NA	NA	Pdzrn3 Sema5b
Pdzrn3	Tmem44	1	1	22	wtNA	NA	wt	Pdzrn3 Tmem44
Pex5l	4930419G24Rik	1	1	4	wthd	NA	NA	Pex5l 4930419G24Rik
Pex5l	Gm37459	1	1	4	wthd	NA	NA	Pex5l Gm37459
Pex5l	Hcn1	1	0.983870967741935	4	wtNA	NA	NA	Pex5l Hcn1
Pex5l	Sorl1	1	1	4	wtNA	NA	wt	Pex5l Sorl1
Phactr1	Dlg2	0.870967741935484	0.995967741935484	2	NAhd	NA	NA	Phactr1 Dlg2
Phactr1	Hivep2	0.862903225806452	0.994623655913978	4	wtNA	NA	NA	Phactr1 Hivep2
Phactr1	Kalrn	0.899193548387097	0.958333333333333	4	wtNA	NA	wt	Phactr1 Kalrn
Phactr1	Nav3	0.991935483870968	1	4	wtNA	NA	NA	Phactr1 Nav3
Phactr1	Pde10a	0.939516129032258	0.897849462365591	4	wtNA	NA	NA	Phactr1 Pde10a
Phactr1	Syt1	0.923387096774194	1	2	NAhd	NA	NA	Phactr1 Syt1
Pid1	Dner	0.943548387096774	0.967741935483871	1	NAhd	NA	NA	Pid1 Dner
PISD	Gm12160	0.991935483870968	1	1	wtNA	wt	wt	PISD Gm12160
Pitpnm2	Kcnj6	0.963709677419355	1	1	wtNA	wt	wt	Pitpnm2 Kcnj6
Plekha1	Wscd2	0.94758064516129	0.651881720430108	1	wtNA	wt	NA	Plekha1 Wscd2
Prkca	Zfp804b	0.923387096774194	0.78494623655914	1	wtNA	NA	NA	Prkca Zfp804b
Prkg1	Cacna1c	0.907258064516129	1	2	NAhd	NA	hd	Prkg1 Cacna1c
Prkg1	Kcnip2	0.891129032258065	1	2	wtNA	NA	wt	Prkg1 Kcnip2
Prkg1	March1	0.995967741935484	1	2	wthd	NA	NA	Prkg1 March1
Ptprd	Cacna1a	0.987903225806452	0.979838709677419	9	NAhd	NA	NA	Ptprd Cacna1a
Ptprd	Celf2	1	0.995967741935484	9	NAhd	NA	hd	Ptprd Celf2
Ptprd	Dcx	0.850806451612903	1	2	wtNA	NA	wt	Ptprd Dcx
Ptprd	Grm3	0.875	0.991935483870968	9	NAhd	NA	NA	Ptprd Grm3
Ptprd	Luzp2	0.983870967741935	1	2	wthd	NA	NA	Ptprd Luzp2
Ptprd	Nrg3	0.963709677419355	1	9	NAhd	NA	NA	Ptprd Nrg3
Ptprd	Prickle2	1	0.993951612903226	9	NAhd	NA	NA	Ptprd Prickle2
Ptprd	Ptprn2	0.862903225806452	1	9	NAhd	NA	NA	Ptprd Ptprn2
Ptprd	Satb1	0.975806451612903	1	9	NAhd	NA	hd	Ptprd Satb1
Ptprd	Tcf4	0.866935483870968	1	9	NAhd	NA	NA	Ptprd Tcf4
Ptprm	Bcl11a	0.979838709677419	0.971774193548387	23	NAhd	NA	hd	Ptprm Bcl11a
Ptprm	Ccdc85a	0.963709677419355	0.997311827956989	23	NAhd	NA	NA	Ptprm Ccdc85a
Ptprm	Ccnd2	0.875	1	23	NAhd	NA	hd	Ptprm Ccnd2
Ptprm	Diaph2	0.919354838709677	1	23	NAhd	NA	hd	Ptprm Diaph2
Ptprm	Egfem1	1	1	23	NAhd	NA	hd	Ptprm Egfem1
Ptprm	Ephb1	0.995967741935484	1	23	NAhd	NA	NA	Ptprm Ephb1
Ptprm	Erbb4	1	0.991935483870968	23	NAhd	NA	NA	Ptprm Erbb4
Ptprm	Fgd4	0.94758064516129	1	23	NAhd	NA	hd	Ptprm Fgd4
Ptprm	Flrt2	0.923387096774194	1	23	NAhd	NA	hd	Ptprm Flrt2
Ptprm	Gsg1l	0.887096774193548	1	23	NAhd	NA	NA	Ptprm Gsg1l
Ptprm	Itpr1	0.903225806451613	1	23	NAhd	NA	NA	Ptprm Itpr1
Ptprm	Kctd1	0.907258064516129	1	23	NAhd	NA	hd	Ptprm Kctd1
Ptprm	Neto1	0.854838709677419	1	23	NAhd	NA	NA	Ptprm Neto1
Ptprm	Nin	0.959677419354839	1	23	NAhd	NA	hd	Ptprm Nin
Ptprm	Pcdh15	0.995967741935484	1	23	NAhd	NA	NA	Ptprm Pcdh15
Ptprm	Pdzrn4	0.939516129032258	1	23	NAhd	NA	hd	Ptprm Pdzrn4
Ptprm	Rps6ka2	0.858870967741935	1	23	NAhd	NA	hd	Ptprm Rps6ka2
Ptprm	Slc15a2	0.979838709677419	0.997983870967742	23	NAhd	NA	hd	Ptprm Slc15a2
Ptprm	Slc24a4	0.850806451612903	1	23	NAhd	NA	NA	Ptprm Slc24a4
Ptprm	Slc2a13	0.919354838709677	1	23	NAhd	NA	NA	Ptprm Slc2a13
Ptprm	St6galnac5	0.850806451612903	1	23	NAhd	NA	NA	Ptprm St6galnac5
Ptprm	Tmtc2	0.919354838709677	1	23	NAhd	NA	NA	Ptprm Tmtc2
Ptprm	Zfp385b	0.858870967741935	1	23	NAhd	NA	NA	Ptprm Zfp385b
Ptprt	Cpne4	0.879032258064516	0.733870967741935	1	wtNA	NA	NA	Ptprt Cpne4
Ptprz1	Hap1	0.943548387096774	1	1	NAhd	NA	hd	Ptprz1 Hap1
Ptprz1	Necab1	0.959677419354839	0.717741935483871	2	wtNA	NA	wt	Ptprz1 Necab1
Ptprz1	Zfhx3	0.919354838709677	1	2	wtNA	NA	NA	Ptprz1 Zfhx3
Rbfox1	Ntng1	0.951612903225806	0.561827956989247	1	wtNA	NA	NA	Rbfox1 Ntng1
Rcan2	Prkcg	0.862903225806452	1	2	NAhd	NA	NA	Rcan2 Prkcg
Rcan2	Rbms1	0.887096774193548	0.987903225806452	2	NAhd	NA	hd	Rcan2 Rbms1
Rfx3	Glis3	1	1	2	wtNA	NA	wt	Rfx3 Glis3
Rfx3	Zfp385b	0.879032258064516	0.955645161290323	2	wtNA	NA	NA	Rfx3 Zfp385b
Rgs20	Gng7	0.899193548387097	0.952956989247312	1	wtNA	NA	NA	Rgs20 Gng7
Rgs6	Fat3	0.995967741935484	0.650537634408602	2	wtNA	NA	wt	Rgs6 Fat3
Rgs6	Rilpl1	0.895161290322581	0.994623655913978	2	wtNA	NA	wt	Rgs6 Rilpl1
Rgs6	Tmem196	0.979838709677419	1	1	NAhd	NA	NA	Rgs6 Tmem196
Rims1	Erc2	0.915322580645161	1	1	NAhd	NA	NA	Rims1 Erc2
Rnf121	Cadm1	0.987903225806452	0.651881720430108	1	NAhd	NA	NA	Rnf121 Cadm1
Rora	Cdh13	0.870967741935484	0.98252688172043	8	wthd	NA	NA	Rora Cdh13
Rora	Cntnap2	0.923387096774194	1	9	NAhd	NA	NA	Rora Cntnap2
Rora	Col6a1	0.943548387096774	1	8	wthd	NA	NA	Rora Col6a1
Rora	Gpr158	0.995967741935484	1	8	wthd	NA	NA	Rora Gpr158
Rora	Gsg1l	0.899193548387097	1	9	NAhd	NA	NA	Rora Gsg1l
Rora	Me3	0.858870967741935	1	8	wtNA	NA	wt	Rora Me3
Rora	Nlgn1	0.879032258064516	1	9	NAhd	NA	NA	Rora Nlgn1
Rora	Nrg1	0.907258064516129	1	8	wtNA	NA	NA	Rora Nrg1
Rora	Ptprd	0.991935483870968	0.997983870967742	8	wthd	NA	NA	Rora Ptprd
Rora	Ptprm	0.862903225806452	1	8	wtNA	NA	NA	Rora Ptprm
Rora	Rims1	1	1	9	NAhd	NA	NA	Rora Rims1
Rora	Slc2a13	0.987903225806452	1	8	wtNA	NA	NA	Rora Slc2a13
Rora	Spock3	0.995967741935484	1	9	NAhd	NA	NA	Rora Spock3
Rorb	Adam33	1	1	23	wtNA	NA	wt	Rorb Adam33
Rorb	Cacna2d3	0.987903225806452	0.991935483870968	23	wtNA	NA	NA	Rorb Cacna2d3
Rorb	Cadps2	0.995967741935484	1	23	wthd	NA	NA	Rorb Cadps2
Rorb	Camk4	0.919354838709677	1	23	wtNA	NA	NA	Rorb Camk4
Rorb	Cdh12	0.923387096774194	1	23	wthd	NA	NA	Rorb Cdh12
Rorb	Cdh6	0.858870967741935	1	23	NAhd	NA	hd	Rorb Cdh6
Rorb	Cnih3	1	1	23	wtNA	NA	wt	Rorb Cnih3
Rorb	Cplx2	0.879032258064516	1	23	NAhd	NA	hd	Rorb Cplx2
Rorb	Dscaml1	0.959677419354839	1	23	NAhd	NA	NA	Rorb Dscaml1
Rorb	Gabrg3	0.991935483870968	1	23	NAhd	NA	NA	Rorb Gabrg3
Rorb	Gm13629	0.971774193548387	1	23	NAhd	NA	NA	Rorb Gm13629
Rorb	Gm20752	1	0.997983870967742	23	wthd	NA	NA	Rorb Gm20752
Rorb	Gm42953	0.879032258064516	1	23	NAhd	NA	hd	Rorb Gm42953
Rorb	Gpr158	0.862903225806452	0.983870967741935	23	wtNA	NA	NA	Rorb Gpr158
Rorb	Grik2	0.955645161290323	1	23	NAhd	NA	NA	Rorb Grik2
Rorb	Hs6st3	0.939516129032258	0.559811827956989	23	wtNA	NA	NA	Rorb Hs6st3
Rorb	Kcnh5	1	0.98991935483871	23	wtNA	NA	wt	Rorb Kcnh5
Rorb	Kcnq3	0.883064516129032	1	23	NAhd	NA	hd	Rorb Kcnq3
Rorb	Kcnt2	0.939516129032258	1	23	wtNA	NA	NA	Rorb Kcnt2
Rorb	Lhfp	1	1	23	NAhd	NA	NA	Rorb Lhfp
Rorb	Ly6e	0.911290322580645	1	23	wtNA	NA	wt	Rorb Ly6e
Rorb	Mb21d2	0.987903225806452	1	23	wtNA	NA	wt	Rorb Mb21d2
Rorb	Mid1	0.955645161290323	1	23	NAhd	NA	hd	Rorb Mid1
Rorb	Myo16	0.987903225806452	1	23	wthd	NA	NA	Rorb Myo16
Rorb	Negr1	0.862903225806452	1	23	NAhd	NA	hd	Rorb Negr1
Rorb	Nrg1	1	1	23	NAhd	NA	NA	Rorb Nrg1
Rorb	Ntrk3	0.943548387096774	0.960349462365591	23	wthd	NA	NA	Rorb Ntrk3
Rorb	Pamr1	0.967741935483871	1	23	wthd	NA	NA	Rorb Pamr1
Rorb	Pld5	0.995967741935484	1	23	wthd	NA	NA	Rorb Pld5
Rorb	Prr16	1	1	23	wtNA	NA	NA	Rorb Prr16
Rorb	R3hdm1	0.991935483870968	0.997983870967742	23	wtNA	NA	NA	Rorb R3hdm1
Rorb	Rcan2	1	0.94758064516129	23	wthd	NA	NA	Rorb Rcan2
Rorb	Rims2	0.955645161290323	1	23	NAhd	NA	NA	Rorb Rims2
Rorb	Rora	0.891129032258065	0.653225806451613	23	NAhd	NA	NA	Rorb Rora
Rorb	Sdk1	0.854838709677419	1	23	wtNA	NA	NA	Rorb Sdk1
Rorb	Stx1a	0.895161290322581	1	23	wtNA	NA	NA	Rorb Stx1a
Rorb	Whrn	0.975806451612903	1	23	wtNA	NA	wt	Rorb Whrn
Rorb	Zmat4	0.995967741935484	1	23	NAhd	NA	NA	Rorb Zmat4
RP24-127M20.8	Gm26804	0.870967741935484	0.960349462365591	3	NAhd	NA	NA	RP24-127M20.8 Gm26804
RP24-127M20.8	Slc24a5	0.951612903225806	0.818548387096774	3	NAhd	NA	NA	RP24-127M20.8 Slc24a5
RP24-127M20.8	Sltm	0.967741935483871	0.958333333333333	3	NAhd	NA	hd	RP24-127M20.8 Sltm
Satb2	5330434G04Rik	0.987903225806452	1	5	NAhd	NA	NA	Satb2 5330434G04Rik
Satb2	Adarb2	0.858870967741935	1	2	wtNA	NA	wt	Satb2 Adarb2
Satb2	Bcl11b	0.862903225806452	0.619623655913978	5	NAhd	NA	NA	Satb2 Bcl11b
Satb2	Dpyd	0.943548387096774	0.977150537634409	5	NAhd	NA	NA	Satb2 Dpyd
Satb2	Lmo3	0.94758064516129	1	5	NAhd	NA	hd	Satb2 Lmo3
Satb2	Nkain3	0.975806451612903	0.954301075268817	2	wtNA	NA	NA	Satb2 Nkain3
Satb2	Zfp536	0.959677419354839	0.900537634408602	5	NAhd	NA	NA	Satb2 Zfp536
Scn9a	Gm13629	1	0.631048387096774	1	wtNA	NA	NA	Scn9a Gm13629
Sdk1	Sulf1	0.983870967741935	0.793010752688172	1	NAhd	NA	NA	Sdk1 Sulf1
Sgcd	Slc35f4	0.862903225806452	1	1	NAhd	NA	NA	Sgcd Slc35f4
Slc1a2	Grm3	0.919354838709677	1	1	wtNA	NA	NA	Slc1a2 Grm3
Slc24a2	Cadps	1	0.975806451612903	2	wtNA	wt	NA	Slc24a2 Cadps
Slc24a2	Rmst	0.951612903225806	1	2	wtNA	wt	wt	Slc24a2 Rmst
Slc24a5	Rap1gapos	0.939516129032258	0.914650537634409	1	wtNA	NA	wt	Slc24a5 Rap1gapos
Slc35f1	Tenm1	0.92741935483871	1	1	wtNA	NA	NA	Slc35f1 Tenm1
Slc9a9	Igfn1	0.866935483870968	0.963709677419355	1	wtNA	NA	wt	Slc9a9 Igfn1
Slit3	Cacna1c	0.915322580645161	1	2	NAhd	NA	hd	Slit3 Cacna1c
Slit3	Dock4	0.995967741935484	1	2	NAhd	NA	hd	Slit3 Dock4
Snhg11	A330102I10Rik	0.850806451612903	0.986559139784946	20	NAhd	NA	hd	Snhg11 A330102I10Rik
Snhg11	Adamtsl1	0.850806451612903	1	20	NAhd	NA	hd	Snhg11 Adamtsl1
Snhg11	Aifm3	0.975806451612903	1	20	NAhd	NA	hd	Snhg11 Aifm3
Snhg11	Ak5	0.995967741935484	1	17	wtNA	NA	wt	Snhg11 Ak5
Snhg11	Ap4s1	0.903225806451613	1	20	NAhd	NA	hd	Snhg11 Ap4s1
Snhg11	Camta1	1	1	17	wthd	NA	NA	Snhg11 Camta1
Snhg11	Cntnap2	0.915322580645161	1	17	wthd	NA	NA	Snhg11 Cntnap2
Snhg11	Coro6	0.94758064516129	1	17	wtNA	NA	wt	Snhg11 Coro6
Snhg11	Cox7b	0.943548387096774	1	20	NAhd	NA	hd	Snhg11 Cox7b
Snhg11	Dtnbos	0.915322580645161	1	20	NAhd	NA	hd	Snhg11 Dtnbos
Snhg11	Epb41	0.903225806451613	0.991935483870968	17	wtNA	NA	NA	Snhg11 Epb41
Snhg11	Fgfr2	0.963709677419355	1	17	wtNA	NA	wt	Snhg11 Fgfr2
Snhg11	Gabbr2	0.883064516129032	1	20	NAhd	NA	NA	Snhg11 Gabbr2
Snhg11	Gm26804	0.967741935483871	1	17	wtNA	NA	NA	Snhg11 Gm26804
Snhg11	Gpatch8	0.995967741935484	1	20	NAhd	NA	NA	Snhg11 Gpatch8
Snhg11	Grb14	0.963709677419355	1	17	wthd	NA	NA	Snhg11 Grb14
Snhg11	Lrfn2	0.923387096774194	1	20	NAhd	NA	hd	Snhg11 Lrfn2
Snhg11	Luzp1	0.891129032258065	1	17	wtNA	NA	wt	Snhg11 Luzp1
Snhg11	Lynx1	0.987903225806452	1	17	wthd	NA	NA	Snhg11 Lynx1
Snhg11	Pdgfc	0.971774193548387	1	17	wtNA	NA	wt	Snhg11 Pdgfc
Snhg11	Pnisr	0.919354838709677	1	20	NAhd	NA	NA	Snhg11 Pnisr
Snhg11	Rasal1	0.94758064516129	1	17	wthd	NA	NA	Snhg11 Rasal1
Snhg11	Rnf165	0.875	1	17	wthd	NA	NA	Snhg11 Rnf165
Snhg11	Scn1a	0.92741935483871	1	17	wtNA	NA	wt	Snhg11 Scn1a
Snhg11	Sema4a	0.931451612903226	1	20	NAhd	NA	hd	Snhg11 Sema4a
Snhg11	Shisa9	0.983870967741935	1	17	wtNA	NA	wt	Snhg11 Shisa9
Snhg11	Tmeff1	0.967741935483871	1	20	NAhd	NA	hd	Snhg11 Tmeff1
Snhg11	Ube3a	1	1	17	wthd	NA	NA	Snhg11 Ube3a
Snhg11	Ulk4	0.883064516129032	1	17	wthd	NA	NA	Snhg11 Ulk4
Snrnp70	Aifm1	0.959677419354839	1	10	NAhd	NA	hd	Snrnp70 Aifm1
Snrnp70	Amph	0.967741935483871	1	8	wtNA	NA	wt	Snrnp70 Amph
Snrnp70	Bsn	0.854838709677419	0.997983870967742	8	wtNA	NA	wt	Snrnp70 Bsn
Snrnp70	Cask	0.923387096774194	1	10	NAhd	NA	NA	Snrnp70 Cask
Snrnp70	Dlgap3	0.92741935483871	1	8	wtNA	NA	wt	Snrnp70 Dlgap3
Snrnp70	Dnajc19	0.862903225806452	1	10	NAhd	NA	hd	Snrnp70 Dnajc19
Snrnp70	Dpysl3	0.899193548387097	1	10	NAhd	NA	hd	Snrnp70 Dpysl3
Snrnp70	Gm42477	0.891129032258065	1	10	NAhd	NA	hd	Snrnp70 Gm42477
Snrnp70	Hook2	0.858870967741935	1	8	wtNA	NA	wt	Snrnp70 Hook2
Snrnp70	Ispd	0.94758064516129	1	10	NAhd	NA	hd	Snrnp70 Ispd
Snrnp70	Mark3	0.983870967741935	0.997983870967742	8	wtNA	NA	wt	Snrnp70 Mark3
Snrnp70	Parp8	0.919354838709677	1	8	wtNA	NA	wt	Snrnp70 Parp8
Snrnp70	Pde3b	0.891129032258065	0.997983870967742	8	wthd	NA	NA	Snrnp70 Pde3b
Snrnp70	Sh3gl3	0.911290322580645	1	10	NAhd	NA	hd	Snrnp70 Sh3gl3
Snrnp70	Snrnp48	0.854838709677419	1	10	NAhd	NA	hd	Snrnp70 Snrnp48
Snrnp70	St13	0.895161290322581	1	10	NAhd	NA	hd	Snrnp70 St13
Snrnp70	Ttc7b	0.866935483870968	1	8	wtNA	NA	wt	Snrnp70 Ttc7b
Sorbs2	Sorbs2os	1	0.955645161290323	1	wthd	NA	NA	Sorbs2 Sorbs2os
Sorcs1	Galntl6	1	0.528225806451613	1	NAhd	NA	NA	Sorcs1 Galntl6
Sox5	Gpr158	0.875	0.958333333333333	4	wthd	NA	NA	Sox5 Gpr158
Sox5	Grm8	0.995967741935484	0.754032258064516	5	NAhd	NA	NA	Sox5 Grm8
Sox5	Hcn1	0.911290322580645	1	5	NAhd	NA	NA	Sox5 Hcn1
Sox5	Sema3e	0.887096774193548	1	4	wthd	NA	NA	Sox5 Sema3e
Sox5	Sox5os4	1	1	4	wthd	NA	NA	Sox5 Sox5os4
Sox5	Trpm3	0.903225806451613	0.806451612903226	4	wtNA	NA	NA	Sox5 Trpm3
Spock3	Galntl6	0.858870967741935	0.521505376344086	1	wtNA	NA	NA	Spock3 Galntl6
St6galnac5	Pigk	1	1	2	wthd	NA	NA	St6galnac5 Pigk
St6galnac5	Shisa9	0.975806451612903	0.860215053763441	2	wtNA	NA	wt	St6galnac5 Shisa9
Stxbp6	Epha7	0.870967741935484	0.983870967741935	1	NAhd	NA	NA	Stxbp6 Epha7
Sulf1	Sdk1	0.995967741935484	1	1	wtNA	NA	NA	Sulf1 Sdk1
Tenm1	Sgcd	0.939516129032258	0.51747311827957	1	NAhd	NA	NA	Tenm1 Sgcd
Tenm2	9530059O14Rik	0.907258064516129	0.869623655913978	2	wtNA	NA	NA	Tenm2 9530059O14Rik
Tenm2	Cadm1	0.931451612903226	0.76747311827957	2	wtNA	NA	NA	Tenm2 Cadm1
Tenm2	Lin28b	0.907258064516129	1	1	NAhd	NA	hd	Tenm2 Lin28b
Tenm3	4930555F03Rik	1	0.94758064516129	2	wtNA	NA	NA	Tenm3 4930555F03Rik
Tenm3	5730522E02Rik	0.967741935483871	1	2	wtNA	NA	NA	Tenm3 5730522E02Rik
Tenm4	Gm15414	0.919354838709677	1	1	wtNA	NA	wt	Tenm4 Gm15414
Thsd7a	Whrn	0.951612903225806	1	1	wtNA	NA	wt	Thsd7a Whrn
Thsd7b	Cntn3	0.971774193548387	1	3	wtNA	NA	NA	Thsd7b Cntn3
Thsd7b	Nfia	0.879032258064516	0.827956989247312	3	wtNA	NA	NA	Thsd7b Nfia
Thsd7b	Sulf1	0.991935483870968	1	3	wtNA	NA	NA	Thsd7b Sulf1
Tmcc3	Galnt18	0.875	1	6	NAhd	hd	hd	Tmcc3 Galnt18
Tmcc3	Lrfn2	0.959677419354839	1	6	NAhd	hd	hd	Tmcc3 Lrfn2
Tmcc3	Mgll	0.895161290322581	0.758064516129032	6	NAhd	hd	hd	Tmcc3 Mgll
Tmcc3	Pcdh17	0.979838709677419	1	6	NAhd	hd	NA	Tmcc3 Pcdh17
Tmcc3	Ptprz1	0.907258064516129	0.955645161290323	6	NAhd	hd	NA	Tmcc3 Ptprz1
Tmcc3	Sergef	0.891129032258065	0.995967741935484	6	NAhd	hd	hd	Tmcc3 Sergef
Tmem163	Ctnna2	0.923387096774194	0.991935483870968	2	wtNA	NA	wt	Tmem163 Ctnna2
Tmem163	Lrrc4c	0.959677419354839	0.963709677419355	3	NAhd	NA	NA	Tmem163 Lrrc4c
Tmem163	Nav2	0.887096774193548	1	3	NAhd	NA	NA	Tmem163 Nav2
Tmem163	Plcl1	0.971774193548387	1	3	NAhd	NA	NA	Tmem163 Plcl1
Tmem163	Ryr2	0.987903225806452	1	2	wtNA	NA	NA	Tmem163 Ryr2
Tox	D5Ertd615e	0.975806451612903	1	3	NAhd	NA	hd	Tox D5Ertd615e
Tox	Gm26883	0.887096774193548	0.991935483870968	3	NAhd	NA	NA	Tox Gm26883
Tox	Prkg1	0.975806451612903	0.876344086021505	3	NAhd	NA	NA	Tox Prkg1
Trhde	4930473D10Rik	1	1	1	wthd	NA	NA	Trhde 4930473D10Rik
Trps1	Angpt1	0.979838709677419	0.995967741935484	2	wtNA	NA	wt	Trps1 Angpt1
Trps1	Cemip	0.862903225806452	0.990591397849462	2	wtNA	NA	NA	Trps1 Cemip
Tshz2	Gm28905	0.939516129032258	1	8	wthd	NA	NA	Tshz2 Gm28905
Tshz2	Grid1	0.858870967741935	1	5	NAhd	NA	NA	Tshz2 Grid1
Tshz2	Htr2c	0.879032258064516	1	8	wtNA	NA	NA	Tshz2 Htr2c
Tshz2	Malat1	0.899193548387097	1	8	wtNA	NA	NA	Tshz2 Malat1
Tshz2	Mcc	0.919354838709677	1	8	wtNA	NA	wt	Tshz2 Mcc
Tshz2	Nxph1	0.987903225806452	1	8	wtNA	NA	wt	Tshz2 Nxph1
Tshz2	Runx2	0.883064516129032	1	8	wtNA	NA	wt	Tshz2 Runx2
Tshz2	Samd4	0.931451612903226	1	8	wtNA	NA	wt	Tshz2 Samd4
Tshz2	Vwc2l	0.850806451612903	0.993951612903226	8	wtNA	NA	wt	Tshz2 Vwc2l
Tshz2	Zbtb16	0.94758064516129	1	5	NAhd	NA	hd	Tshz2 Zbtb16
Tshz2	Zfpm2	0.92741935483871	1	5	NAhd	NA	NA	Tshz2 Zfpm2
Tshz2	Zmat4	0.963709677419355	1	5	NAhd	NA	NA	Tshz2 Zmat4
Unc13c	Crtac1	0.862903225806452	1	2	wtNA	NA	wt	Unc13c Crtac1
Unc13c	Gtf2ird1	0.879032258064516	1	2	wtNA	NA	NA	Unc13c Gtf2ird1
Unc5d	Brinp3	0.983870967741935	1	5	wthd	NA	NA	Unc5d Brinp3
Unc5d	Gabrg3	0.870967741935484	0.986559139784946	5	wtNA	NA	NA	Unc5d Gabrg3
Unc5d	Grm8	0.943548387096774	1	5	wtNA	NA	NA	Unc5d Grm8
Unc5d	Kcnn2	0.983870967741935	1	5	wtNA	NA	NA	Unc5d Kcnn2
Unc5d	Pde8b	0.903225806451613	1	5	wtNA	NA	NA	Unc5d Pde8b
Vwc2l	Olfm3	1	0.850806451612903	1	wtNA	wt	wt	Vwc2l Olfm3
Xkr4	Gm1992	1	1	1	wthd	NA	NA	Xkr4 Gm1992
Zbtb20	Gm28928	1	0.625	1	NAhd	NA	NA	Zbtb20 Gm28928
Zbtb20	Lyzl4	0.911290322580645	1	4	wtNA	NA	NA	Zbtb20 Lyzl4
Zbtb20	Olfm2	0.951612903225806	1	4	wtNA	NA	wt	Zbtb20 Olfm2
Zbtb20	Satb2	0.858870967741935	0.997983870967742	4	wtNA	NA	NA	Zbtb20 Satb2
Zbtb20	Tmem108	0.883064516129032	1	4	wtNA	NA	NA	Zbtb20 Tmem108
Zcchc16	Trpc5	0.991935483870968	0.961693548387097	1	wtNA	NA	NA	Zcchc16 Trpc5
Zeb1	Prpf4b	0.862903225806452	1	1	wtNA	NA	wt	Zeb1 Prpf4b
Zfhx3	Ghr	1	0.548387096774194	2	wtNA	NA	NA	Zfhx3 Ghr
Zfhx3	Nfyc	0.92741935483871	1	1	NAhd	NA	hd	Zfhx3 Nfyc
Zfhx3	Nhs	0.875	0.948924731182796	2	wtNA	NA	NA	Zfhx3 Nhs
Zfp385b	Gm13944	0.971774193548387	1	1	wthd	NA	NA	Zfp385b Gm13944
Zfp536	Ndst4	0.995967741935484	0.84005376344086	1	wthd	NA	NA	Zfp536 Ndst4
Zfpm2	Cpa6	0.891129032258065	1	2	NAhd	NA	hd	Zfpm2 Cpa6
Zfpm2	Frmd5	0.935483870967742	1	2	NAhd	NA	NA	Zfpm2 Frmd5
Zmat4	6530403H02Rik	1	0.709677419354839	3	NAhd	NA	NA	Zmat4 6530403H02Rik
Zmat4	9530059O14Rik	1	1	6	wthd	NA	NA	Zmat4 9530059O14Rik
Zmat4	Cacnb4	0.943548387096774	1	6	wtNA	NA	NA	Zmat4 Cacnb4
Zmat4	Gm13629	0.943548387096774	1	6	wtNA	NA	NA	Zmat4 Gm13629
Zmat4	Gria1	0.935483870967742	1	3	NAhd	NA	NA	Zmat4 Gria1
Zmat4	Grm1	0.903225806451613	1	6	wtNA	NA	wt	Zmat4 Grm1
Zmat4	Ppm1l	0.943548387096774	1	6	wtNA	NA	wt	Zmat4 Ppm1l
Zmat4	Rorb	1	0.820564516129032	6	wtNA	NA	NA	Zmat4 Rorb

## Sheet: Yellow_neuron bnet
from.x	to.x	strength.x	direction.x	degree.out	condcat	uninode	uninode	edgename
March1	Cadm1	0.967741935483871	1	2	wtNA	NA	NA	March1 Cadm1
March1	Lin28b	0.903225806451613	1	1	NAhd	NA	hd	March1 Lin28b
March1	Smarca2	0.94758064516129	1	2	wtNA	NA	wt	March1 Smarca2
2900055J20Rik	Kctd16	1	0.961693548387097	1	wtNA	NA	NA	2900055J20Rik Kctd16
4930419G24Rik	Gm37459	0.959677419354839	0.528897849462366	1	wtNA	NA	NA	4930419G24Rik Gm37459
4930448N21Rik	Alcam	0.987903225806452	0.975806451612903	3	NAhd	NA	NA	4930448N21Rik Alcam
4930448N21Rik	Cadps2	0.94758064516129	0.926075268817204	3	NAhd	NA	NA	4930448N21Rik Cadps2
4930448N21Rik	Sphkap	0.991935483870968	0.995967741935484	3	NAhd	NA	NA	4930448N21Rik Sphkap
4930578G10Rik	Gm10600	0.919354838709677	1	2	wtNA	NA	wt	4930578G10Rik Gm10600
4930578G10Rik	Gm12394	1	0.913306451612903	2	wthd	NA	NA	4930578G10Rik Gm12394
5330434G04Rik	Satb2	0.987903225806452	0.671370967741935	1	NAhd	NA	NA	5330434G04Rik Satb2
6530403H02Rik	Asap1	0.983870967741935	1	3	NAhd	NA	NA	6530403H02Rik Asap1
6530403H02Rik	Gm10848	0.903225806451613	1	3	NAhd	NA	NA	6530403H02Rik Gm10848
6530403H02Rik	Slc44a5	0.866935483870968	1	1	wtNA	NA	wt	6530403H02Rik Slc44a5
6530403H02Rik	Snhg11	0.911290322580645	0.740591397849462	3	NAhd	NA	NA	6530403H02Rik Snhg11
A830018L16Rik	Tenm1	0.891129032258065	0.611559139784946	1	wtNA	NA	NA	A830018L16Rik Tenm1
Adgrl2	Gm30382	1	0.778225806451613	1	wthd	NA	NA	Adgrl2 Gm30382
Adora2a	Drd2	1	0.921370967741935	2	wtNA	NA	NA	Adora2a Drd2
Adora2a	Lingo2	1	1	2	wtNA	NA	NA	Adora2a Lingo2
Agbl4	Elavl4	0.94758064516129	1	1	wtNA	NA	NA	Agbl4 Elavl4
Alk	Cacna2d3	0.903225806451613	0.904569892473118	1	NAhd	NA	NA	Alk Cacna2d3
Arhgap26	Fgf1	0.979838709677419	1	1	wthd	NA	NA	Arhgap26 Fgf1
Asic2	Gm11418	1	1	1	wthd	NA	NA	Asic2 Gm11418
Astn2	Brinp1	0.923387096774194	0.971774193548387	2	wtNA	NA	NA	Astn2 Brinp1
Astn2	Brinp3	1	0.766129032258065	2	wtNA	NA	NA	Astn2 Brinp3
Auts2	Cadm2	0.971774193548387	0.51747311827957	2	wtNA	NA	NA	Auts2 Cadm2
Auts2	Gm42439	1	1	2	wthd	NA	NA	Auts2 Gm42439
Bach2	Grip1	0.866935483870968	0.586021505376344	2	wtNA	wt	NA	Bach2 Grip1
Bach2	Sgk1	0.919354838709677	1	2	wtNA	wt	NA	Bach2 Sgk1
Bcl11b	Cpne9	0.850806451612903	1	1	wtNA	NA	NA	Bcl11b Cpne9
Brinp3	Gm15584	1	1	2	wthd	NA	NA	Brinp3 Gm15584
Brinp3	Gpc6	0.923387096774194	0.630376344086021	2	wtNA	NA	NA	Brinp3 Gpc6
Cacna1a	Ntng2	0.983870967741935	0.995967741935484	2	NAhd	NA	NA	Cacna1a Ntng2
Cacna1a	Synpr	0.935483870967742	1	2	NAhd	NA	NA	Cacna1a Synpr
Cacna2d3	2010111I01Rik	0.975806451612903	1	30	wtNA	NA	wt	Cacna2d3 2010111I01Rik
Cacna2d3	Alcam	0.923387096774194	1	30	wtNA	NA	NA	Cacna2d3 Alcam
Cacna2d3	Ano4	0.995967741935484	1	30	wtNA	NA	NA	Cacna2d3 Ano4
Cacna2d3	Auts2	1	1	30	wtNA	NA	NA	Cacna2d3 Auts2
Cacna2d3	Bcl11a	0.963709677419355	1	30	wtNA	NA	wt	Cacna2d3 Bcl11a
Cacna2d3	Cacna1d	1	0.967741935483871	30	wtNA	NA	NA	Cacna2d3 Cacna1d
Cacna2d3	Cap2	0.895161290322581	1	7	NAhd	NA	hd	Cacna2d3 Cap2
Cacna2d3	Epha4	0.971774193548387	1	30	wtNA	NA	wt	Cacna2d3 Epha4
Cacna2d3	Fam135b	0.854838709677419	1	30	wtNA	NA	NA	Cacna2d3 Fam135b
Cacna2d3	Fat3	0.891129032258065	1	30	wtNA	NA	NA	Cacna2d3 Fat3
Cacna2d3	Fhod3	1	1	30	wtNA	NA	NA	Cacna2d3 Fhod3
Cacna2d3	Gm20754	0.883064516129032	1	30	wtNA	NA	NA	Cacna2d3 Gm20754
Cacna2d3	Grm7	0.987903225806452	1	30	wtNA	NA	wt	Cacna2d3 Grm7
Cacna2d3	Hs3st4	1	0.816532258064516	30	wtNA	NA	NA	Cacna2d3 Hs3st4
Cacna2d3	Jam3	0.915322580645161	1	30	wtNA	NA	wt	Cacna2d3 Jam3
Cacna2d3	Kcnq5	0.991935483870968	1	30	wthd	NA	NA	Cacna2d3 Kcnq5
Cacna2d3	Large	0.891129032258065	1	30	wtNA	NA	NA	Cacna2d3 Large
Cacna2d3	Ldlr	0.854838709677419	1	30	wtNA	NA	wt	Cacna2d3 Ldlr
Cacna2d3	Lrtm1	1	0.991935483870968	30	wthd	NA	NA	Cacna2d3 Lrtm1
Cacna2d3	Me3	0.955645161290323	1	30	wtNA	NA	NA	Cacna2d3 Me3
Cacna2d3	Mgat4c	0.919354838709677	0.932795698924731	30	wtNA	NA	NA	Cacna2d3 Mgat4c
Cacna2d3	Ncald	0.983870967741935	1	30	wtNA	NA	NA	Cacna2d3 Ncald
Cacna2d3	Pde8b	0.991935483870968	1	7	NAhd	NA	NA	Cacna2d3 Pde8b
Cacna2d3	Pdzrn4	0.92741935483871	1	30	wtNA	NA	NA	Cacna2d3 Pdzrn4
Cacna2d3	Plcxd3	0.975806451612903	0.946908602150538	7	NAhd	NA	NA	Cacna2d3 Plcxd3
Cacna2d3	Rab30	0.854838709677419	1	30	wtNA	NA	NA	Cacna2d3 Rab30
Cacna2d3	Sgcz	0.951612903225806	1	30	wtNA	NA	NA	Cacna2d3 Sgcz
Cacna2d3	Slc2a13	0.919354838709677	0.991935483870968	30	wtNA	NA	wt	Cacna2d3 Slc2a13
Cacna2d3	Sntg1	1	0.969758064516129	30	wtNA	NA	wt	Cacna2d3 Sntg1
Cacna2d3	Sorcs1	1	1	30	wtNA	NA	NA	Cacna2d3 Sorcs1
Cacna2d3	Spon1	0.991935483870968	1	30	wthd	NA	NA	Cacna2d3 Spon1
Cacna2d3	Syt7	1	1	30	wtNA	NA	NA	Cacna2d3 Syt7
Cacna2d3	Vwc2l	0.875	1	30	wthd	NA	NA	Cacna2d3 Vwc2l
Cacnb2	Bbx	0.92741935483871	1	6	wtNA	NA	NA	Cacnb2 Bbx
Cacnb2	Cnr1	1	1	6	wtNA	NA	wt	Cacnb2 Cnr1
Cacnb2	Gm10848	1	1	6	wthd	NA	NA	Cacnb2 Gm10848
Cacnb2	Gm13269	1	1	6	wthd	NA	NA	Cacnb2 Gm13269
Cacnb2	Peli2	0.875	1	6	wtNA	NA	NA	Cacnb2 Peli2
Cacnb2	Wbscr17	1	0.987903225806452	6	wtNA	NA	NA	Cacnb2 Wbscr17
Cadm1	Malat1	0.995967741935484	1	3	wtNA	NA	NA	Cadm1 Malat1
Cadm1	Rnf121	1	1	3	wthd	NA	NA	Cadm1 Rnf121
Cadm1	Tenm2	0.991935483870968	0.986559139784946	3	wthd	NA	NA	Cadm1 Tenm2
Cadm2	Crym	1	1	2	NAhd	NA	hd	Cadm2 Crym
Cadm2	Gli3	0.991935483870968	1	3	wtNA	NA	NA	Cadm2 Gli3
Cadm2	Kcnd2	0.866935483870968	1	3	wtNA	NA	NA	Cadm2 Kcnd2
Cadm2	Nnat	1	1	3	wthd	NA	NA	Cadm2 Nnat
Cadps2	Dab1	0.919354838709677	0.682123655913978	1	NAhd	NA	NA	Cadps2 Dab1
Cadps2	Shisa6	0.995967741935484	1	1	wtNA	NA	NA	Cadps2 Shisa6
Caln1	Cacna1e	0.987903225806452	1	2	wtNA	NA	wt	Caln1 Cacna1e
Caln1	Nnat	0.903225806451613	1	2	wtNA	NA	NA	Caln1 Nnat
Camk2d	Cpne4	1	0.701612903225806	4	NAhd	NA	NA	Camk2d Cpne4
Camk2d	Dpyd	1	0.997983870967742	2	wthd	NA	NA	Camk2d Dpyd
Camk2d	Epha3	1	1	4	NAhd	NA	hd	Camk2d Epha3
Camk2d	Grm3	0.854838709677419	1	4	NAhd	NA	NA	Camk2d Grm3
Camk2d	Mgll	0.887096774193548	0.994623655913979	2	wtNA	NA	wt	Camk2d Mgll
Car10	Afap1l1	1	1	16	wtNA	NA	wt	Car10 Afap1l1
Car10	Ankrd33b	0.915322580645161	1	16	wtNA	NA	wt	Car10 Ankrd33b
Car10	Anxa11	0.967741935483871	1	16	wtNA	NA	wt	Car10 Anxa11
Car10	Arhgap15	0.967741935483871	1	16	wtNA	NA	NA	Car10 Arhgap15
Car10	BC030499	0.995967741935484	1	16	wtNA	NA	wt	Car10 BC030499
Car10	Cpne9	1	1	16	wthd	NA	NA	Car10 Cpne9
Car10	Dnajc21	0.94758064516129	1	16	wtNA	NA	wt	Car10 Dnajc21
Car10	Exph5	1	1	16	wtNA	NA	wt	Car10 Exph5
Car10	Frmd6	0.983870967741935	1	16	wtNA	NA	wt	Car10 Frmd6
Car10	Grid1	0.995967741935484	1	16	wtNA	NA	NA	Car10 Grid1
Car10	Grin2a	0.955645161290323	0.995967741935484	16	wthd	NA	NA	Car10 Grin2a
Car10	Herc6	0.911290322580645	1	16	wtNA	NA	wt	Car10 Herc6
Car10	Ildr2	0.987903225806452	1	8	NAhd	NA	hd	Car10 Ildr2
Car10	Mgat4c	0.983870967741935	1	16	wthd	NA	NA	Car10 Mgat4c
Car10	Plxna4	0.887096774193548	1	8	NAhd	NA	NA	Car10 Plxna4
Car10	Pparg	0.963709677419355	1	16	wthd	NA	NA	Car10 Pparg
Car10	Ptprk	0.979838709677419	0.987903225806452	16	wthd	NA	NA	Car10 Ptprk
Car10	Ryr3	1	0.991935483870968	16	wtNA	NA	NA	Car10 Ryr3
Car10	Tmem117	0.903225806451613	1	8	NAhd	NA	NA	Car10 Tmem117
Car4	cellType_MSN	0.991935483870968	0.997311827956989	1	NAhd	NA	NA	Car4 cellType_MSN
Cdh13	9530026P05Rik	0.887096774193548	1	5	wtNA	NA	wt	Cdh13 9530026P05Rik
Cdh13	Col23a1	0.963709677419355	1	5	wtNA	NA	wt	Cdh13 Col23a1
Cdh13	Nckap5	0.991935483870968	1	5	wtNA	NA	wt	Cdh13 Nckap5
Cdh13	Prss12	0.883064516129032	1	5	wtNA	NA	NA	Cdh13 Prss12
Cdh13	RP24-134N2.1	0.858870967741935	1	5	wtNA	NA	NA	Cdh13 RP24-134N2.1
Cdh18	Auts2	0.971774193548387	1	4	wtNA	NA	NA	Cdh18 Auts2
Cdh18	Cdk14	0.975806451612903	1	4	wtNA	NA	NA	Cdh18 Cdk14
Cdh18	Esrrg	0.911290322580645	1	3	NAhd	NA	NA	Cdh18 Esrrg
Cdh18	Fam19a1	0.991935483870968	0.991935483870968	3	NAhd	NA	NA	Cdh18 Fam19a1
Cdh18	Lrrtm4	0.939516129032258	0.977822580645161	3	NAhd	NA	NA	Cdh18 Lrrtm4
Cdh18	Nwd2	0.995967741935484	1	4	wtNA	NA	NA	Cdh18 Nwd2
Cdh18	Pou6f2	0.963709677419355	1	4	wtNA	NA	wt	Cdh18 Pou6f2
Cdh8	A330008L17Rik	1	1	1	wthd	NA	NA	Cdh8 A330008L17Rik
Cdh8	Tenm2	0.895161290322581	0.943548387096774	2	NAhd	NA	NA	Cdh8 Tenm2
Celf2	Gm26565	0.991935483870968	1	1	wtNA	NA	wt	Celf2 Gm26565
Cfap54	PISD	1	0.818548387096774	1	NAhd	NA	NA	Cfap54 PISD
Chrm3	Col19a1	0.907258064516129	1	2	wtNA	NA	NA	Chrm3 Col19a1
Chrm3	Opcml	0.987903225806452	0.950268817204301	1	NAhd	NA	NA	Chrm3 Opcml
Chrm3	Rgs6	0.951612903225806	0.897849462365591	2	wtNA	NA	NA	Chrm3 Rgs6
Clstn2	4921534H16Rik	1	0.979838709677419	1	wthd	NA	NA	Clstn2 4921534H16Rik
Cnr1	Dpp10	0.955645161290323	1	2	wtNA	wt	NA	Cnr1 Dpp10
Cnr1	Itga9	0.875	1	2	wtNA	wt	NA	Cnr1 Itga9
Cntn3	Gm44188	1	1	1	wthd	NA	NA	Cntn3 Gm44188
Cntn4	Cntn6	1	0.995967741935484	1	wthd	NA	NA	Cntn4 Cntn6
Cntn5	Cadps2	0.907258064516129	0.903225806451613	4	wtNA	NA	NA	Cntn5 Cadps2
Cntn5	Egfem1	0.991935483870968	1	4	wtNA	NA	NA	Cntn5 Egfem1
Cntn5	Foxo1	0.919354838709677	1	4	wthd	NA	NA	Cntn5 Foxo1
Cntn5	Robo2	0.987903225806452	1	4	wtNA	NA	NA	Cntn5 Robo2
Cntnap4	Egfem1	0.987903225806452	1	1	wtNA	wt	NA	Cntnap4 Egfem1
Cntnap5a	Runx2	0.854838709677419	1	2	NAhd	NA	NA	Cntnap5a Runx2
Cntnap5a	Smoc2	0.943548387096774	1	2	NAhd	NA	NA	Cntnap5a Smoc2
Cntnap5c	Lmo7	0.891129032258065	1	1	wtNA	NA	NA	Cntnap5c Lmo7
Csmd1	Grin2b	0.971774193548387	1	1	NAhd	NA	hd	Csmd1 Grin2b
Csmd3	Grid2	0.939516129032258	0.564516129032258	2	wtNA	NA	NA	Csmd3 Grid2
Csmd3	Lsamp	0.991935483870968	0.577956989247312	2	wtNA	NA	NA	Csmd3 Lsamp
Ctnna3	Lrrtm3	1	0.971774193548387	1	wthd	NA	NA	Ctnna3 Lrrtm3
Cux1	Gm16599	1	1	1	NAhd	NA	NA	Cux1 Gm16599
Cux2	BC030499	0.94758064516129	1	10	wtNA	NA	wt	Cux2 BC030499
Cux2	Bcl11b	1	1	10	wtNA	NA	NA	Cux2 Bcl11b
Cux2	Camk2a	0.92741935483871	0.866935483870968	10	wtNA	NA	NA	Cux2 Camk2a
Cux2	Cux1	0.959677419354839	1	10	wthd	NA	NA	Cux2 Cux1
Cux2	Gm16599	1	1	10	wtNA	NA	NA	Cux2 Gm16599
Cux2	Grik3	0.862903225806452	0.966397849462366	10	wtNA	NA	NA	Cux2 Grik3
Cux2	Gsg1l	0.895161290322581	1	10	wtNA	NA	NA	Cux2 Gsg1l
Cux2	Rasgrf2	1	1	10	wtNA	NA	NA	Cux2 Rasgrf2
Cux2	Stard8	0.854838709677419	1	10	wtNA	NA	wt	Cux2 Stard8
Cux2	Stxbp6	0.967741935483871	1	10	wtNA	NA	NA	Cux2 Stxbp6
D430041D05Rik	Gm13883	1	1	1	wthd	NA	NA	D430041D05Rik Gm13883
Dab1	Chrm2	0.935483870967742	0.986559139784946	2	NAhd	NA	NA	Dab1 Chrm2
Dab1	Fhod3	0.935483870967742	1	1	wtNA	NA	NA	Dab1 Fhod3
Dab1	Meis2	0.971774193548387	0.80510752688172	2	NAhd	NA	NA	Dab1 Meis2
Dach1	Ebf1	0.987903225806452	1	6	wthd	NA	NA	Dach1 Ebf1
Dach1	Klhl1	0.931451612903226	1	5	NAhd	NA	hd	Dach1 Klhl1
Dach1	Nrg1	0.995967741935484	0.939516129032258	5	NAhd	NA	NA	Dach1 Nrg1
Dach1	Prr16	0.911290322580645	1	6	wtNA	NA	NA	Dach1 Prr16
Dach1	Ralyl	0.995967741935484	1	6	wtNA	NA	wt	Dach1 Ralyl
Dach1	Reln	1	1	6	wtNA	NA	NA	Dach1 Reln
Dach1	Robo2	1	1	6	wthd	NA	NA	Dach1 Robo2
Dach1	Sdk1	0.983870967741935	1	6	wthd	NA	NA	Dach1 Sdk1
Dgkb	2010300C02Rik	1	1	29	wtNA	NA	NA	Dgkb 2010300C02Rik
Dgkb	3110021N24Rik	0.862903225806452	0.985215053763441	29	wtNA	NA	NA	Dgkb 3110021N24Rik
Dgkb	9530059O14Rik	1	1	29	wtNA	NA	wt	Dgkb 9530059O14Rik
Dgkb	Arap2	0.951612903225806	1	29	wtNA	NA	NA	Dgkb Arap2
Dgkb	Asap1	0.983870967741935	1	29	wtNA	NA	NA	Dgkb Asap1
Dgkb	Cacna1d	0.983870967741935	0.959005376344086	29	wtNA	NA	NA	Dgkb Cacna1d
Dgkb	Cacnb4	0.991935483870968	1	29	wtNA	NA	NA	Dgkb Cacnb4
Dgkb	Dock4	0.866935483870968	1	29	wtNA	NA	wt	Dgkb Dock4
Dgkb	Enox1	1	1	29	wtNA	NA	NA	Dgkb Enox1
Dgkb	Ephb2	0.915322580645161	1	29	wtNA	NA	NA	Dgkb Ephb2
Dgkb	Gfra2	0.975806451612903	1	29	wtNA	NA	NA	Dgkb Gfra2
Dgkb	Gm2163	1	1	29	wtNA	NA	NA	Dgkb Gm2163
Dgkb	Gm26936	0.903225806451613	1	29	wtNA	NA	NA	Dgkb Gm26936
Dgkb	Hs3st4	0.959677419354839	0.743951612903226	29	wtNA	NA	NA	Dgkb Hs3st4
Dgkb	Igsf11	1	1	29	wtNA	NA	NA	Dgkb Igsf11
Dgkb	Kirrel3	1	1	29	wthd	NA	NA	Dgkb Kirrel3
Dgkb	Lrrtm4	1	0.997983870967742	29	wtNA	NA	NA	Dgkb Lrrtm4
Dgkb	Map3k5	0.995967741935484	0.997983870967742	29	wtNA	NA	wt	Dgkb Map3k5
Dgkb	Pcdh9	0.858870967741935	0.985215053763441	29	wtNA	NA	NA	Dgkb Pcdh9
Dgkb	Rfx3	0.971774193548387	0.997983870967742	29	wtNA	NA	wt	Dgkb Rfx3
Dgkb	Rgl1	0.983870967741935	0.967741935483871	29	wtNA	NA	wt	Dgkb Rgl1
Dgkb	Satb1	0.935483870967742	1	29	wtNA	NA	NA	Dgkb Satb1
Dgkb	Scai	0.951612903225806	1	29	wtNA	NA	NA	Dgkb Scai
Dgkb	Slc35f4	0.866935483870968	1	29	wtNA	NA	wt	Dgkb Slc35f4
Dgkb	Slit3	0.987903225806452	1	29	wthd	NA	NA	Dgkb Slit3
Dgkb	Spock1	0.879032258064516	0.997983870967742	29	wtNA	NA	NA	Dgkb Spock1
Dgkb	Trhde	1	0.995967741935484	29	wtNA	NA	NA	Dgkb Trhde
Dgkb	Tshz3	0.987903225806452	1	29	wtNA	NA	NA	Dgkb Tshz3
Dgkb	Zmat4	1	1	29	wtNA	NA	NA	Dgkb Zmat4
Dlg2	Anks1b	0.919354838709677	0.65994623655914	1	wtNA	NA	NA	Dlg2 Anks1b
Dner	Pid1	1	0.993951612903226	1	wthd	NA	NA	Dner Pid1
Dpp6	Alk	0.879032258064516	0.994623655913978	1	wtNA	NA	NA	Dpp6 Alk
Dpyd	Atp2b2	1	1	10	wthd	NA	NA	Dpyd Atp2b2
Dpyd	Cacnb4	0.979838709677419	1	10	wthd	NA	NA	Dpyd Cacnb4
Dpyd	Cdh4	0.979838709677419	1	10	wthd	NA	NA	Dpyd Cdh4
Dpyd	Dscaml1	0.943548387096774	0.974462365591398	9	NAhd	NA	NA	Dpyd Dscaml1
Dpyd	Gpm6b	0.895161290322581	1	9	NAhd	NA	hd	Dpyd Gpm6b
Dpyd	Inpp4b	0.951612903225806	0.948924731182796	9	NAhd	NA	NA	Dpyd Inpp4b
Dpyd	Kalrn	1	1	10	wtNA	NA	NA	Dpyd Kalrn
Dpyd	Kcnd3	0.943548387096774	1	10	wtNA	NA	NA	Dpyd Kcnd3
Dpyd	Mtcl1	0.987903225806452	1	10	wthd	NA	NA	Dpyd Mtcl1
Dpyd	Nkain3	1	1	10	wthd	NA	NA	Dpyd Nkain3
Dpyd	Pard3b	0.899193548387097	1	10	wtNA	NA	NA	Dpyd Pard3b
Dpyd	Pcdh19	0.879032258064516	1	10	wtNA	NA	wt	Dpyd Pcdh19
Dpyd	Pcsk2	0.967741935483871	1	10	wthd	NA	NA	Dpyd Pcsk2
Drd2	Adarb2	0.995967741935484	1	9	wtNA	NA	NA	Drd2 Adarb2
Drd2	Ebf1	0.939516129032258	1	9	wtNA	NA	NA	Drd2 Ebf1
Drd2	Erbb4	0.963709677419355	0.966397849462366	9	wtNA	NA	NA	Drd2 Erbb4
Drd2	Fig4	0.979838709677419	1	9	wtNA	NA	wt	Drd2 Fig4
Drd2	Lingo2	1	1	9	wtNA	NA	NA	Drd2 Lingo2
Drd2	Mdk	0.907258064516129	1	9	wtNA	NA	wt	Drd2 Mdk
Drd2	Oprd1	0.983870967741935	1	9	wtNA	NA	NA	Drd2 Oprd1
Drd2	Ptprm	0.903225806451613	1	9	wtNA	NA	NA	Drd2 Ptprm
Drd2	Samd4	0.875	1	9	wtNA	NA	wt	Drd2 Samd4
Dscam	Ptk2b	0.971774193548387	1	1	wtNA	NA	wt	Dscam Ptk2b
Dtnb	Dtnbos	0.975806451612903	1	1	wtNA	NA	NA	Dtnb Dtnbos
Ebf1	Adarb2	1	1	15	NAhd	NA	NA	Ebf1 Adarb2
Ebf1	Bmp6	0.983870967741935	1	15	NAhd	NA	NA	Ebf1 Bmp6
Ebf1	Ccdc88c	0.967741935483871	1	6	wthd	NA	NA	Ebf1 Ccdc88c
Ebf1	Cdh13	1	1	15	NAhd	NA	NA	Ebf1 Cdh13
Ebf1	Fam19a2	0.939516129032258	0.990591397849462	15	NAhd	NA	NA	Ebf1 Fam19a2
Ebf1	Fstl5	1	1	15	NAhd	NA	hd	Ebf1 Fstl5
Ebf1	Htr4	1	1	6	wtNA	NA	NA	Ebf1 Htr4
Ebf1	Ildr2	0.879032258064516	1	15	NAhd	NA	hd	Ebf1 Ildr2
Ebf1	Kcnd3	0.899193548387097	1	6	wthd	NA	NA	Ebf1 Kcnd3
Ebf1	Necab1	0.862903225806452	1	6	wthd	NA	NA	Ebf1 Necab1
Ebf1	Oprd1	0.983870967741935	1	6	wtNA	NA	NA	Ebf1 Oprd1
Ebf1	Pde4b	1	1	15	NAhd	NA	NA	Ebf1 Pde4b
Ebf1	Reln	0.935483870967742	1	15	NAhd	NA	NA	Ebf1 Reln
Ebf1	Samd5	0.879032258064516	1	6	wthd	NA	NA	Ebf1 Samd5
Ebf1	Sec14l1	1	1	15	NAhd	NA	NA	Ebf1 Sec14l1
Ebf1	Slc24a3	0.991935483870968	1	15	NAhd	NA	NA	Ebf1 Slc24a3
Ebf1	Vat1l	1	1	15	NAhd	NA	NA	Ebf1 Vat1l
Egln1	Tsnax	0.903225806451613	0.788978494623656	1	wtNA	wt	NA	Egln1 Tsnax
Epha4	Sema5b	0.959677419354839	0.905913978494624	1	wtNA	wt	wt	Epha4 Sema5b
Epha6	Cntnap5a	0.850806451612903	0.995967741935484	3	wtNA	NA	NA	Epha6 Cntnap5a
Epha6	Csmd2	0.995967741935484	1	1	NAhd	NA	NA	Epha6 Csmd2
Epha6	Dab1	1	1	3	wtNA	NA	NA	Epha6 Dab1
Epha6	Robo1	0.975806451612903	1	3	wtNA	NA	NA	Epha6 Robo1
Erbb4	Cacnb2	1	0.991935483870968	22	NAhd	NA	NA	Erbb4 Cacnb2
Erbb4	Cdh12	0.879032258064516	0.979838709677419	22	NAhd	NA	NA	Erbb4 Cdh12
Erbb4	Chrm3	0.983870967741935	1	22	NAhd	NA	NA	Erbb4 Chrm3
Erbb4	Cntnap5a	0.899193548387097	1	22	NAhd	NA	NA	Erbb4 Cntnap5a
Erbb4	Dgkb	0.895161290322581	0.991935483870968	22	NAhd	NA	NA	Erbb4 Dgkb
Erbb4	Dpp6	1	0.98991935483871	22	NAhd	NA	NA	Erbb4 Dpp6
Erbb4	Gfra1	0.854838709677419	0.99260752688172	22	NAhd	NA	hd	Erbb4 Gfra1
Erbb4	Gng7	1	0.979838709677419	22	NAhd	NA	NA	Erbb4 Gng7
Erbb4	Hpca	0.923387096774194	0.940188172043011	22	NAhd	NA	NA	Erbb4 Hpca
Erbb4	Iqgap2	0.987903225806452	0.995967741935484	22	NAhd	NA	NA	Erbb4 Iqgap2
Erbb4	Meis2	1	0.98991935483871	22	NAhd	NA	NA	Erbb4 Meis2
Erbb4	Nrg3	0.971774193548387	0.772849462365591	22	NAhd	NA	NA	Erbb4 Nrg3
Erbb4	Nrgn	1	0.995967741935484	22	NAhd	NA	hd	Erbb4 Nrgn
Erbb4	Pard3b	0.879032258064516	1	1	wthd	NA	NA	Erbb4 Pard3b
Erbb4	Ptchd4	0.94758064516129	1	22	NAhd	NA	NA	Erbb4 Ptchd4
Erbb4	Ptprm	0.907258064516129	0.981854838709677	22	NAhd	NA	NA	Erbb4 Ptprm
Erbb4	Rgs6	0.879032258064516	0.991263440860215	22	NAhd	NA	NA	Erbb4 Rgs6
Erbb4	Robo1	0.955645161290323	0.995967741935484	22	NAhd	NA	NA	Erbb4 Robo1
Erbb4	RP24-134N2.1	1	1	22	NAhd	NA	NA	Erbb4 RP24-134N2.1
Erbb4	Spock3	0.911290322580645	1	22	NAhd	NA	NA	Erbb4 Spock3
Erbb4	Tmem132d	0.995967741935484	1	22	NAhd	NA	hd	Erbb4 Tmem132d
Erbb4	Wbscr17	0.94758064516129	1	22	NAhd	NA	NA	Erbb4 Wbscr17
Etl4	Cdh11	0.983870967741935	1	7	wtNA	NA	NA	Etl4 Cdh11
Etl4	Cdh18	0.94758064516129	0.951612903225806	7	wtNA	NA	NA	Etl4 Cdh18
Etl4	Diras2	0.891129032258065	1	7	wtNA	NA	wt	Etl4 Diras2
Etl4	Fgf13	1	1	7	wtNA	NA	wt	Etl4 Fgf13
Etl4	Frmpd4	0.915322580645161	0.868279569892473	7	wtNA	NA	NA	Etl4 Frmpd4
Etl4	Gm17171	1	1	7	wthd	NA	NA	Etl4 Gm17171
Etl4	Grik3	0.991935483870968	0.995967741935484	7	wtNA	NA	NA	Etl4 Grik3
Etl4	Nr3c2	0.862903225806452	1	2	NAhd	NA	NA	Etl4 Nr3c2
Fam155a	Gm27247	0.92741935483871	0.995967741935484	3	NAhd	NA	NA	Fam155a Gm27247
Fam155a	Kcnq5	0.995967741935484	1	2	wthd	NA	NA	Fam155a Kcnq5
Fam155a	Pdzd2	0.991935483870968	1	3	NAhd	NA	NA	Fam155a Pdzd2
Fam155a	Ptchd4	0.971774193548387	1	2	wtNA	NA	NA	Fam155a Ptchd4
Fam196b	Dock2	1	0.977822580645161	1	wthd	NA	NA	Fam196b Dock2
Fam19a1	Adgrb3	0.891129032258065	1	21	wtNA	NA	NA	Fam19a1 Adgrb3
Fam19a1	Bmp1	0.854838709677419	1	21	wtNA	NA	wt	Fam19a1 Bmp1
Fam19a1	Cald1	0.995967741935484	1	21	wtNA	NA	wt	Fam19a1 Cald1
Fam19a1	Cask	0.895161290322581	1	19	NAhd	NA	NA	Fam19a1 Cask
Fam19a1	Chst8	0.891129032258065	1	21	wtNA	NA	NA	Fam19a1 Chst8
Fam19a1	Col26a1	0.971774193548387	1	19	NAhd	NA	NA	Fam19a1 Col26a1
Fam19a1	Dscaml1	0.866935483870968	0.991935483870968	21	wtNA	NA	NA	Fam19a1 Dscaml1
Fam19a1	Egfem1	0.991935483870968	1	21	wtNA	NA	NA	Fam19a1 Egfem1
Fam19a1	Epb41	0.991935483870968	1	21	wtNA	NA	NA	Fam19a1 Epb41
Fam19a1	Epha10	0.939516129032258	1	19	NAhd	NA	NA	Fam19a1 Epha10
Fam19a1	Etl4	1	0.995967741935484	19	NAhd	NA	NA	Fam19a1 Etl4
Fam19a1	Fam19a2	0.963709677419355	0.995967741935484	21	wthd	NA	NA	Fam19a1 Fam19a2
Fam19a1	Fgf14	0.963709677419355	1	21	wtNA	NA	NA	Fam19a1 Fgf14
Fam19a1	Glis3	0.987903225806452	1	19	NAhd	NA	NA	Fam19a1 Glis3
Fam19a1	Gpc5	0.983870967741935	1	19	NAhd	NA	NA	Fam19a1 Gpc5
Fam19a1	Hdac9	0.987903225806452	1	19	NAhd	NA	NA	Fam19a1 Hdac9
Fam19a1	Homer2	1	1	19	NAhd	NA	NA	Fam19a1 Homer2
Fam19a1	Lpp	0.995967741935484	1	19	NAhd	NA	NA	Fam19a1 Lpp
Fam19a1	Lrrtm4	0.975806451612903	0.991935483870968	21	wtNA	NA	NA	Fam19a1 Lrrtm4
Fam19a1	Man2a1	0.955645161290323	1	21	wthd	NA	NA	Fam19a1 Man2a1
Fam19a1	Mctp1	0.963709677419355	1	19	NAhd	NA	hd	Fam19a1 Mctp1
Fam19a1	Mmp16	0.995967741935484	1	19	NAhd	NA	NA	Fam19a1 Mmp16
Fam19a1	Ndst3	1	1	21	wthd	NA	NA	Fam19a1 Ndst3
Fam19a1	Nkain3	0.891129032258065	1	19	NAhd	NA	NA	Fam19a1 Nkain3
Fam19a1	Ntng1	0.951612903225806	1	21	wtNA	NA	NA	Fam19a1 Ntng1
Fam19a1	Olfm3	1	1	21	wtNA	NA	NA	Fam19a1 Olfm3
Fam19a1	Pitpnc1	0.931451612903226	1	21	wtNA	NA	wt	Fam19a1 Pitpnc1
Fam19a1	Ppfibp1	1	1	19	NAhd	NA	NA	Fam19a1 Ppfibp1
Fam19a1	Prkd1	0.895161290322581	1	19	NAhd	NA	NA	Fam19a1 Prkd1
Fam19a1	Rad51ap2	0.943548387096774	1	21	wtNA	NA	wt	Fam19a1 Rad51ap2
Fam19a1	Rapgef5	1	1	21	wtNA	NA	NA	Fam19a1 Rapgef5
Fam19a1	Raver2	0.975806451612903	1	19	NAhd	NA	hd	Fam19a1 Raver2
Fam19a1	Rgs7	0.975806451612903	1	19	NAhd	NA	NA	Fam19a1 Rgs7
Fam19a1	Smyd3	0.955645161290323	1	21	wtNA	NA	NA	Fam19a1 Smyd3
Fam19a1	Sphkap	1	1	21	wtNA	NA	NA	Fam19a1 Sphkap
Fam19a1	Zfp536	0.903225806451613	1	21	wtNA	NA	NA	Fam19a1 Zfp536
Fam19a1	Zfp697	1	1	21	wtNA	NA	NA	Fam19a1 Zfp697
Fam19a2	Arhgap26	0.971774193548387	1	15	wtNA	NA	NA	Fam19a2 Arhgap26
Fam19a2	Ccser1	0.887096774193548	1	15	wtNA	NA	wt	Fam19a2 Ccser1
Fam19a2	Cntn5	0.858870967741935	1	3	NAhd	NA	NA	Fam19a2 Cntn5
Fam19a2	Epha10	0.967741935483871	1	15	wtNA	NA	NA	Fam19a2 Epha10
Fam19a2	Epha5	0.879032258064516	1	15	wtNA	NA	NA	Fam19a2 Epha5
Fam19a2	Epha6	0.971774193548387	0.991935483870968	15	wtNA	NA	NA	Fam19a2 Epha6
Fam19a2	Fras1	0.987903225806452	1	15	wtNA	NA	wt	Fam19a2 Fras1
Fam19a2	Inpp4b	0.995967741935484	0.995967741935484	15	wtNA	NA	NA	Fam19a2 Inpp4b
Fam19a2	Lmo3	0.903225806451613	1	15	wtNA	NA	NA	Fam19a2 Lmo3
Fam19a2	Myo16	1	1	15	wthd	NA	NA	Fam19a2 Myo16
Fam19a2	Npas3	0.975806451612903	1	15	wtNA	NA	wt	Fam19a2 Npas3
Fam19a2	Ppfibp1	0.991935483870968	1	15	wtNA	NA	NA	Fam19a2 Ppfibp1
Fam19a2	Thsd7a	0.923387096774194	1	15	wthd	NA	NA	Fam19a2 Thsd7a
Fam19a2	Ubash3b	0.971774193548387	1	15	wtNA	NA	wt	Fam19a2 Ubash3b
Fam19a2	Unc13c	0.955645161290323	1	15	wtNA	NA	NA	Fam19a2 Unc13c
Fam19a2	Zfp618	0.995967741935484	1	15	wtNA	NA	NA	Fam19a2 Zfp618
Fmn1	Gm13963	1	0.993951612903226	1	wthd	NA	NA	Fmn1 Gm13963
Foxp2	Adarb2	0.923387096774194	1	2	NAhd	NA	NA	Foxp2 Adarb2
Foxp2	Nell1	0.943548387096774	1	6	wtNA	NA	NA	Foxp2 Nell1
Foxp2	Nrxn3	1	1	6	wtNA	NA	NA	Foxp2 Nrxn3
Foxp2	Plxdc2	0.943548387096774	1	6	wtNA	NA	wt	Foxp2 Plxdc2
Foxp2	Pparg	0.862903225806452	1	6	wtNA	NA	NA	Foxp2 Pparg
Foxp2	Unc5c	0.991935483870968	1	6	wthd	NA	NA	Foxp2 Unc5c
Foxp2	Zfhx3	0.983870967741935	1	6	wtNA	NA	NA	Foxp2 Zfhx3
Frmd4b	Adam23	0.899193548387097	1	38	wtNA	NA	NA	Frmd4b Adam23
Frmd4b	Adcy2	1	1	38	wtNA	NA	NA	Frmd4b Adcy2
Frmd4b	Arid5b	0.963709677419355	1	38	wtNA	NA	wt	Frmd4b Arid5b
Frmd4b	Bcl11a	0.951612903225806	1	38	wtNA	NA	wt	Frmd4b Bcl11a
Frmd4b	C530008M17Rik	0.939516129032258	1	38	wtNA	NA	NA	Frmd4b C530008M17Rik
Frmd4b	Car11	0.955645161290323	1	38	wtNA	NA	wt	Frmd4b Car11
Frmd4b	Cdk14	0.975806451612903	1	38	wtNA	NA	NA	Frmd4b Cdk14
Frmd4b	Ckb	0.891129032258065	1	38	wtNA	NA	NA	Frmd4b Ckb
Frmd4b	Csmd2	1	1	38	wtNA	NA	NA	Frmd4b Csmd2
Frmd4b	Ddx5	1	1	38	wtNA	NA	NA	Frmd4b Ddx5
Frmd4b	Elmod1	0.911290322580645	1	38	wtNA	NA	NA	Frmd4b Elmod1
Frmd4b	Eml1	0.963709677419355	1	38	wtNA	NA	NA	Frmd4b Eml1
Frmd4b	Foxn3	0.959677419354839	1	38	wtNA	NA	NA	Frmd4b Foxn3
Frmd4b	Galnt13	0.991935483870968	1	38	wtNA	NA	NA	Frmd4b Galnt13
Frmd4b	Gm26691	0.899193548387097	1	38	wtNA	NA	NA	Frmd4b Gm26691
Frmd4b	Igsf11	1	0.657258064516129	38	wtNA	NA	NA	Frmd4b Igsf11
Frmd4b	Kcnab1	1	1	38	wtNA	NA	NA	Frmd4b Kcnab1
Frmd4b	Khdrbs2	0.870967741935484	0.787634408602151	38	wtNA	NA	wt	Frmd4b Khdrbs2
Frmd4b	Kpna4	0.967741935483871	1	38	wtNA	NA	NA	Frmd4b Kpna4
Frmd4b	Lzts3	0.858870967741935	1	38	wtNA	NA	NA	Frmd4b Lzts3
Frmd4b	Mapt	0.995967741935484	1	38	wtNA	NA	NA	Frmd4b Mapt
Frmd4b	Miat	1	1	38	wtNA	NA	NA	Frmd4b Miat
Frmd4b	Mirg	0.887096774193548	1	38	wtNA	NA	NA	Frmd4b Mirg
Frmd4b	Mtcl1	0.983870967741935	1	38	wtNA	NA	NA	Frmd4b Mtcl1
Frmd4b	Ndrg4	0.995967741935484	1	38	wtNA	NA	NA	Frmd4b Ndrg4
Frmd4b	Rab30	0.903225806451613	1	38	wtNA	NA	NA	Frmd4b Rab30
Frmd4b	Sgk1	0.94758064516129	1	38	wtNA	NA	NA	Frmd4b Sgk1
Frmd4b	Sh3gl2	1	1	38	wtNA	NA	NA	Frmd4b Sh3gl2
Frmd4b	Shank1	0.975806451612903	1	38	wtNA	NA	NA	Frmd4b Shank1
Frmd4b	Sidt1	1	1	38	wtNA	NA	NA	Frmd4b Sidt1
Frmd4b	Slc35f4	0.854838709677419	1	38	wtNA	NA	wt	Frmd4b Slc35f4
Frmd4b	Slc6a6	1	0.995967741935484	38	wtNA	NA	NA	Frmd4b Slc6a6
Frmd4b	Snrnp70	0.963709677419355	1	38	wtNA	NA	NA	Frmd4b Snrnp70
Frmd4b	Sorcs2	1	0.903225806451613	38	wtNA	NA	wt	Frmd4b Sorcs2
Frmd4b	Strn	1	1	38	wtNA	NA	NA	Frmd4b Strn
Frmd4b	Trank1	0.995967741935484	1	38	wtNA	NA	NA	Frmd4b Trank1
Frmd4b	Unc80	0.879032258064516	1	38	wtNA	NA	wt	Frmd4b Unc80
Frmd4b	Zbtb20	0.94758064516129	0.995967741935484	38	wtNA	NA	NA	Frmd4b Zbtb20
Frmpd4	Fam19a1	0.899193548387097	0.516129032258065	3	wtNA	NA	NA	Frmpd4 Fam19a1
Frmpd4	Mmp16	0.854838709677419	1	3	wtNA	NA	NA	Frmpd4 Mmp16
Frmpd4	Trps1	0.850806451612903	1	3	wtNA	NA	NA	Frmpd4 Trps1
Fstl4	Car10	0.935483870967742	0.985887096774194	2	wtNA	NA	NA	Fstl4 Car10
Fstl4	Kcnh1	0.939516129032258	0.987903225806452	2	wthd	NA	NA	Fstl4 Kcnh1
Gabra2	Cfap54	0.866935483870968	1	1	wtNA	NA	NA	Gabra2 Cfap54
Galntl6	Epha3	0.919354838709677	1	4	NAhd	NA	hd	Galntl6 Epha3
Galntl6	Gm26905	1	1	2	wthd	NA	NA	Galntl6 Gm26905
Galntl6	Ncam2	1	1	4	NAhd	NA	hd	Galntl6 Ncam2
Galntl6	Sorcs1	0.991935483870968	1	2	wthd	NA	NA	Galntl6 Sorcs1
Gm10848	Gm13269	1	0.887096774193548	1	wtNA	NA	NA	Gm10848 Gm13269
Gm11149	A930015D03Rik	0.987903225806452	0.991935483870968	1	wtNA	NA	NA	Gm11149 A930015D03Rik
Gm13052	Kazn	0.919354838709677	0.987903225806452	1	wtNA	NA	NA	Gm13052 Kazn
Gm13629	Scn9a	1	0.616935483870968	1	wthd	NA	NA	Gm13629 Scn9a
Gm13974	Gm28494	1	0.94758064516129	1	wthd	NA	NA	Gm13974 Gm28494
Gm15398	cellType_Ex	0.899193548387097	0.553091397849462	3	NAhd	NA	NA	Gm15398 cellType_Ex
Gm15398	Gnal	0.991935483870968	0.549059139784946	3	NAhd	NA	NA	Gm15398 Gnal
Gm15398	Pcdh15	1	0.504032258064516	1	wthd	NA	NA	Gm15398 Pcdh15
Gm16599	Cux1	1	1	1	wtNA	NA	NA	Gm16599 Cux1
Gm20754	4930509J09Rik	1	1	1	wthd	NA	NA	Gm20754 4930509J09Rik
Gm2163	4930578G10Rik	1	1	3	wthd	NA	NA	Gm2163 4930578G10Rik
Gm2163	Gm10600	0.995967741935484	1	3	wtNA	NA	wt	Gm2163 Gm10600
Gm2163	Gm12394	1	1	3	wthd	NA	NA	Gm2163 Gm12394
Gm2163	Gm26835	0.899193548387097	1	3	NAhd	NA	NA	Gm2163 Gm26835
Gm26883	Tshz2	1	1	1	wthd	NA	NA	Gm26883 Tshz2
Gm27247	1700057H15Rik	1	1	5	wthd	NA	NA	Gm27247 1700057H15Rik
Gm27247	Gm13211	0.850806451612903	1	5	wtNA	NA	wt	Gm27247 Gm13211
Gm27247	Gm42705	0.94758064516129	1	5	wtNA	NA	NA	Gm27247 Gm42705
Gm27247	Iqgap2	0.903225806451613	1	5	wtNA	NA	NA	Gm27247 Iqgap2
Gm27247	Vat1l	0.862903225806452	1	5	wtNA	NA	NA	Gm27247 Vat1l
Gm28376	Jph1	1	1	1	wthd	NA	NA	Gm28376 Jph1
Gm28609	Pik3c2b	0.995967741935484	0.866935483870968	1	NAhd	NA	NA	Gm28609 Pik3c2b
Gm28928	2610035D17Rik	0.850806451612903	1	53	NAhd	NA	hd	Gm28928 2610035D17Rik
Gm28928	3110035E14Rik	0.951612903225806	1	36	wthd	NA	NA	Gm28928 3110035E14Rik
Gm28928	9430020K01Rik	0.94758064516129	1	36	wtNA	NA	NA	Gm28928 9430020K01Rik
Gm28928	Adcy1	1	1	36	wthd	NA	NA	Gm28928 Adcy1
Gm28928	Arhgap22	0.92741935483871	1	36	wthd	NA	NA	Gm28928 Arhgap22
Gm28928	Arid1b	0.870967741935484	0.995295698924731	53	NAhd	NA	hd	Gm28928 Arid1b
Gm28928	Cemip	0.991935483870968	1	53	NAhd	NA	NA	Gm28928 Cemip
Gm28928	Cntnap5b	1	1	36	wthd	NA	NA	Gm28928 Cntnap5b
Gm28928	Col19a1	0.967741935483871	1	53	NAhd	NA	NA	Gm28928 Col19a1
Gm28928	Cpne4	0.92741935483871	0.826612903225806	36	wtNA	NA	NA	Gm28928 Cpne4
Gm28928	Cux1	1	1	53	NAhd	NA	NA	Gm28928 Cux1
Gm28928	Dkk3	1	1	36	wthd	NA	NA	Gm28928 Dkk3
Gm28928	Dlc1	0.975806451612903	1	36	wthd	NA	NA	Gm28928 Dlc1
Gm28928	Dlg2	0.987903225806452	1	53	NAhd	NA	NA	Gm28928 Dlg2
Gm28928	Dner	0.967741935483871	0.993951612903226	53	NAhd	NA	NA	Gm28928 Dner
Gm28928	Dpp10	1	1	36	wthd	NA	NA	Gm28928 Dpp10
Gm28928	Esrrg	0.987903225806452	1	53	NAhd	NA	NA	Gm28928 Esrrg
Gm28928	Ext1	1	1	36	wthd	NA	NA	Gm28928 Ext1
Gm28928	Galnt9	1	1	53	NAhd	NA	NA	Gm28928 Galnt9
Gm28928	Garnl3	0.971774193548387	1	53	NAhd	NA	NA	Gm28928 Garnl3
Gm28928	Gfra2	0.923387096774194	1	36	wthd	NA	NA	Gm28928 Gfra2
Gm28928	Gm13832	0.983870967741935	0.997983870967742	36	wthd	NA	NA	Gm28928 Gm13832
Gm28928	Gm16599	1	1	36	wtNA	NA	NA	Gm28928 Gm16599
Gm28928	Gria3	0.92741935483871	0.980510752688172	36	wtNA	NA	wt	Gm28928 Gria3
Gm28928	Hs3st2	1	1	36	wthd	NA	NA	Gm28928 Hs3st2
Gm28928	Hs3st4	1	0.568548387096774	36	wthd	NA	NA	Gm28928 Hs3st4
Gm28928	Htr1f	0.875	0.983870967741935	36	wtNA	NA	wt	Gm28928 Htr1f
Gm28928	Igsf21	1	1	53	NAhd	NA	hd	Gm28928 Igsf21
Gm28928	Il1rapl2	0.862903225806452	0.99260752688172	53	NAhd	NA	NA	Gm28928 Il1rapl2
Gm28928	Khdrbs3	1	1	36	wthd	NA	NA	Gm28928 Khdrbs3
Gm28928	Kit	0.870967741935484	1	53	NAhd	NA	hd	Gm28928 Kit
Gm28928	Ldb2	1	1	53	NAhd	NA	NA	Gm28928 Ldb2
Gm28928	Lhfpl3	0.987903225806452	1	53	NAhd	NA	NA	Gm28928 Lhfpl3
Gm28928	Limch1	0.907258064516129	1	36	wthd	NA	NA	Gm28928 Limch1
Gm28928	Lingo2	0.858870967741935	0.977150537634409	36	wtNA	NA	NA	Gm28928 Lingo2
Gm28928	Lmo4	0.991935483870968	1	53	NAhd	NA	hd	Gm28928 Lmo4
Gm28928	Lyzl4	0.875	1	36	wtNA	NA	wt	Gm28928 Lyzl4
Gm28928	Mpped1	0.971774193548387	1	53	NAhd	NA	hd	Gm28928 Mpped1
Gm28928	Negr1	0.850806451612903	1	53	NAhd	NA	hd	Gm28928 Negr1
Gm28928	Nfix	0.983870967741935	0.995967741935484	53	NAhd	NA	NA	Gm28928 Nfix
Gm28928	Nos1ap	0.935483870967742	0.759408602150538	36	wtNA	NA	NA	Gm28928 Nos1ap
Gm28928	Ntm	0.975806451612903	1	36	wthd	NA	NA	Gm28928 Ntm
Gm28928	Opcml	0.991935483870968	1	36	wthd	NA	NA	Gm28928 Opcml
Gm28928	Pde1a	1	0.995967741935484	36	wthd	NA	NA	Gm28928 Pde1a
Gm28928	Pde4a	1	1	36	wthd	NA	NA	Gm28928 Pde4a
Gm28928	Pde4d	0.963709677419355	1	36	wthd	NA	NA	Gm28928 Pde4d
Gm28928	Pde8b	0.991935483870968	1	53	NAhd	NA	NA	Gm28928 Pde8b
Gm28928	Pld5	0.895161290322581	1	36	wthd	NA	NA	Gm28928 Pld5
Gm28928	Prkg1	0.899193548387097	1	36	wtNA	NA	NA	Gm28928 Prkg1
Gm28928	Rcan2	0.975806451612903	1	53	NAhd	NA	NA	Gm28928 Rcan2
Gm28928	Rora	0.971774193548387	1	53	NAhd	NA	NA	Gm28928 Rora
Gm28928	Scn9a	0.94758064516129	1	53	NAhd	NA	NA	Gm28928 Scn9a
Gm28928	Sdk2	1	1	36	wthd	NA	NA	Gm28928 Sdk2
Gm28928	Sema4a	0.862903225806452	1	36	wtNA	NA	wt	Gm28928 Sema4a
Gm28928	Sgcd	0.883064516129032	0.604838709677419	53	NAhd	NA	hd	Gm28928 Sgcd
Gm28928	Shisa6	0.963709677419355	1	53	NAhd	NA	NA	Gm28928 Shisa6
Gm28928	Shisa9	1	1	53	NAhd	NA	NA	Gm28928 Shisa9
Gm28928	Sorcs1	0.983870967741935	1	53	NAhd	NA	NA	Gm28928 Sorcs1
Gm28928	Sulf2	1	1	36	wthd	NA	NA	Gm28928 Sulf2
Gm28928	Tmem108	0.995967741935484	1	53	NAhd	NA	NA	Gm28928 Tmem108
Gm28928	Tmem196	0.875	1	53	NAhd	NA	NA	Gm28928 Tmem196
Gm28928	Tmtc1	0.92741935483871	1	36	wtNA	NA	NA	Gm28928 Tmtc1
Gm28928	Tox	0.991935483870968	1	53	NAhd	NA	NA	Gm28928 Tox
Gm28928	Xylt1	0.955645161290323	1	36	wtNA	NA	NA	Gm28928 Xylt1
Gm28928	Zbtb20	1	0.633064516129032	53	NAhd	NA	NA	Gm28928 Zbtb20
Gm28928	Zfhx4	1	1	36	wtNA	NA	NA	Gm28928 Zfhx4
Gm28928	Zfpm2	0.895161290322581	0.977150537634409	36	wtNA	NA	NA	Gm28928 Zfpm2
Gm42418	Cmss1	1	0.782258064516129	1	wthd	NA	NA	Gm42418 Cmss1
Gm42418	Paxbp1	0.870967741935484	0.995967741935484	4	NAhd	NA	NA	Gm42418 Paxbp1
Gm42418	Prpf4b	0.939516129032258	1	4	NAhd	NA	hd	Gm42418 Prpf4b
Gm42418	Zfp799	0.923387096774194	1	4	NAhd	NA	hd	Gm42418 Zfp799
Gm42705	Gm6260	1	0.997983870967742	1	wthd	NA	NA	Gm42705 Gm6260
Gnal	cellType_Ex	1	0.504032258064516	1	NAhd	NA	NA	Gnal cellType_Ex
Gng7	2210408I21Rik	0.971774193548387	0.993951612903226	79	NAhd	NA	NA	Gng7 2210408I21Rik
Gng7	4921511C10Rik	0.883064516129032	0.997983870967742	79	NAhd	NA	NA	Gng7 4921511C10Rik
Gng7	4930578G10Rik	1	1	79	NAhd	NA	NA	Gng7 4930578G10Rik
Gng7	Acap2	1	0.995967741935484	79	NAhd	NA	NA	Gng7 Acap2
Gng7	Acyp2	0.967741935483871	1	79	NAhd	NA	NA	Gng7 Acyp2
Gng7	Adcy5	0.995967741935484	0.993279569892473	79	NAhd	NA	NA	Gng7 Adcy5
Gng7	Arhgap10	0.931451612903226	1	79	NAhd	NA	NA	Gng7 Arhgap10
Gng7	Asxl3	0.915322580645161	1	79	NAhd	NA	NA	Gng7 Asxl3
Gng7	Baiap2	0.854838709677419	1	79	NAhd	NA	NA	Gng7 Baiap2
Gng7	Basp1	0.879032258064516	1	79	NAhd	NA	NA	Gng7 Basp1
Gng7	Bsn	0.991935483870968	0.997983870967742	79	NAhd	NA	NA	Gng7 Bsn
Gng7	Camkv	0.903225806451613	0.981182795698925	79	NAhd	NA	NA	Gng7 Camkv
Gng7	Ccdc64	0.955645161290323	0.997311827956989	79	NAhd	NA	NA	Gng7 Ccdc64
Gng7	Cit	0.951612903225806	1	79	NAhd	NA	hd	Gng7 Cit
Gng7	Ckb	0.92741935483871	0.991935483870968	79	NAhd	NA	NA	Gng7 Ckb
Gng7	Cpe	0.919354838709677	0.995967741935484	79	NAhd	NA	NA	Gng7 Cpe
Gng7	Cpne5	0.991935483870968	0.991935483870968	79	NAhd	NA	NA	Gng7 Cpne5
Gng7	Dclk2	0.854838709677419	1	79	NAhd	NA	NA	Gng7 Dclk2
Gng7	Ddx5	0.991935483870968	0.983870967741935	79	NAhd	NA	NA	Gng7 Ddx5
Gng7	Dock9	0.983870967741935	0.995967741935484	79	NAhd	NA	NA	Gng7 Dock9
Gng7	Eif4g3	0.850806451612903	0.991263440860215	79	NAhd	NA	NA	Gng7 Eif4g3
Gng7	Elavl4	0.987903225806452	0.997311827956989	79	NAhd	NA	NA	Gng7 Elavl4
Gng7	Epb41	0.891129032258065	0.995295698924731	79	NAhd	NA	NA	Gng7 Epb41
Gng7	Fam49a	0.858870967741935	0.997983870967742	79	NAhd	NA	NA	Gng7 Fam49a
Gng7	Flot2	0.899193548387097	0.989247311827957	79	NAhd	NA	hd	Gng7 Flot2
Gng7	Flrt2	0.951612903225806	1	79	NAhd	NA	NA	Gng7 Flrt2
Gng7	Fnbp1l	0.955645161290323	1	79	NAhd	NA	hd	Gng7 Fnbp1l
Gng7	Frmd4b	0.862903225806452	0.997983870967742	79	NAhd	NA	NA	Gng7 Frmd4b
Gng7	Gm2163	0.923387096774194	1	79	NAhd	NA	NA	Gng7 Gm2163
Gng7	Gm26691	0.963709677419355	0.995295698924731	79	NAhd	NA	NA	Gng7 Gm26691
Gng7	Gm26733	1	1	79	NAhd	NA	NA	Gng7 Gm26733
Gng7	Gng2	0.895161290322581	1	79	NAhd	NA	NA	Gng7 Gng2
Gng7	Jakmip1	1	0.995967741935484	79	NAhd	NA	NA	Gng7 Jakmip1
Gng7	Kcnq1	0.866935483870968	0.987231182795699	79	NAhd	NA	NA	Gng7 Kcnq1
Gng7	Kctd1	0.959677419354839	0.99260752688172	79	NAhd	NA	hd	Gng7 Kctd1
Gng7	Kpna4	0.975806451612903	1	79	NAhd	NA	NA	Gng7 Kpna4
Gng7	Lingo1	0.92741935483871	0.997983870967742	79	NAhd	NA	NA	Gng7 Lingo1
Gng7	Lmo7	1	1	79	NAhd	NA	NA	Gng7 Lmo7
Gng7	Man1a	1	0.993951612903226	79	NAhd	NA	NA	Gng7 Man1a
Gng7	Me3	0.911290322580645	1	79	NAhd	NA	NA	Gng7 Me3
Gng7	Mfn1	1	0.98991935483871	79	NAhd	NA	hd	Gng7 Mfn1
Gng7	Miat	0.866935483870968	1	79	NAhd	NA	NA	Gng7 Miat
Gng7	Mpped1	0.854838709677419	1	79	NAhd	NA	hd	Gng7 Mpped1
Gng7	Ogt	0.850806451612903	0.997983870967742	79	NAhd	NA	NA	Gng7 Ogt
Gng7	Olfm1	0.995967741935484	0.997983870967742	79	NAhd	NA	NA	Gng7 Olfm1
Gng7	Osbpl8	0.915322580645161	1	79	NAhd	NA	NA	Gng7 Osbpl8
Gng7	Pcdh10	0.94758064516129	0.997983870967742	79	NAhd	NA	NA	Gng7 Pcdh10
Gng7	Pcdh17	0.963709677419355	1	79	NAhd	NA	NA	Gng7 Pcdh17
Gng7	Pcnxl2	0.971774193548387	0.997983870967742	79	NAhd	NA	NA	Gng7 Pcnxl2
Gng7	Pde2a	1	0.997983870967742	79	NAhd	NA	NA	Gng7 Pde2a
Gng7	Plppr1	0.963709677419355	0.993951612903226	79	NAhd	NA	NA	Gng7 Plppr1
Gng7	Ppp1r14c	0.931451612903226	0.995967741935484	79	NAhd	NA	NA	Gng7 Ppp1r14c
Gng7	Ppp2r3a	0.862903225806452	1	79	NAhd	NA	NA	Gng7 Ppp2r3a
Gng7	Prkag2	0.975806451612903	1	79	NAhd	NA	hd	Gng7 Prkag2
Gng7	Rab30	0.991935483870968	0.997983870967742	79	NAhd	NA	NA	Gng7 Rab30
Gng7	Rap1gap	1	0.997983870967742	79	NAhd	NA	NA	Gng7 Rap1gap
Gng7	Rcan2	0.983870967741935	0.979838709677419	79	NAhd	NA	NA	Gng7 Rcan2
Gng7	Rgs9	1	0.993951612903226	79	NAhd	NA	NA	Gng7 Rgs9
Gng7	Rit2	0.923387096774194	0.987231182795699	79	NAhd	NA	hd	Gng7 Rit2
Gng7	Rsrp1	0.987903225806452	0.986559139784946	79	NAhd	NA	hd	Gng7 Rsrp1
Gng7	Rtn1	0.979838709677419	0.995967741935484	79	NAhd	NA	hd	Gng7 Rtn1
Gng7	Scaper	0.983870967741935	0.997983870967742	79	NAhd	NA	NA	Gng7 Scaper
Gng7	Scmh1	0.991935483870968	0.991935483870968	79	NAhd	NA	NA	Gng7 Scmh1
Gng7	Senp7	0.895161290322581	0.995295698924731	79	NAhd	NA	NA	Gng7 Senp7
Gng7	Slc17a7	1	0.983870967741935	79	NAhd	NA	NA	Gng7 Slc17a7
Gng7	Slc6a6	0.979838709677419	1	79	NAhd	NA	NA	Gng7 Slc6a6
Gng7	Son	0.951612903225806	0.995967741935484	79	NAhd	NA	hd	Gng7 Son
Gng7	Srgap1	0.919354838709677	1	79	NAhd	NA	NA	Gng7 Srgap1
Gng7	Stk3	0.899193548387097	0.995967741935484	79	NAhd	NA	NA	Gng7 Stk3
Gng7	Sv2b	0.975806451612903	1	79	NAhd	NA	NA	Gng7 Sv2b
Gng7	Syt14	0.875	1	79	NAhd	NA	hd	Gng7 Syt14
Gng7	Tmcc3	0.935483870967742	0.936827956989247	79	NAhd	NA	NA	Gng7 Tmcc3
Gng7	Tmem191c	0.919354838709677	0.979838709677419	79	NAhd	NA	NA	Gng7 Tmem191c
Gng7	Trank1	1	1	79	NAhd	NA	NA	Gng7 Trank1
Gng7	Trim9	0.850806451612903	0.995295698924731	79	NAhd	NA	NA	Gng7 Trim9
Gng7	Unc13b	0.975806451612903	1	79	NAhd	NA	NA	Gng7 Unc13b
Gng7	Wnk1	0.883064516129032	0.997311827956989	79	NAhd	NA	NA	Gng7 Wnk1
Gng7	Ypel2	0.899193548387097	0.98991935483871	79	NAhd	NA	hd	Gng7 Ypel2
Gng7	Zeb1	0.963709677419355	1	79	NAhd	NA	NA	Gng7 Zeb1
Gpc6	Edil3	0.915322580645161	1	3	wtNA	NA	wt	Gpc6 Edil3
Gpc6	Gpc5	0.995967741935484	1	3	wthd	NA	NA	Gpc6 Gpc5
Gpc6	Rgs6	0.959677419354839	0.543010752688172	4	NAhd	NA	NA	Gpc6 Rgs6
Gpc6	Rxfp1	0.951612903225806	1	4	NAhd	NA	NA	Gpc6 Rxfp1
Gpc6	Thrb	0.995967741935484	1	3	wthd	NA	NA	Gpc6 Thrb
Grik3	Hnrnpll	0.862903225806452	1	1	wtNA	NA	wt	Grik3 Hnrnpll
Grik3	Lingo2	1	0.701612903225806	1	NAhd	NA	NA	Grik3 Lingo2
Grip1	Alk	0.971774193548387	0.826612903225806	2	wthd	NA	NA	Grip1 Alk
Grip1	Fstl4	0.995967741935484	0.691532258064516	2	wtNA	NA	NA	Grip1 Fstl4
Grm3	Pak7	0.967741935483871	1	1	wtNA	NA	NA	Grm3 Pak7
Grm7	Lrrc4c	1	0.592741935483871	1	wtNA	wt	NA	Grm7 Lrrc4c
Hcn1	Pex5l	0.987903225806452	0.963709677419355	1	wtNA	wt	NA	Hcn1 Pex5l
Hivep2	Gm26835	1	0.713709677419355	1	wthd	NA	NA	Hivep2 Gm26835
Homer1	Abhd2	0.903225806451613	1	2	NAhd	NA	hd	Homer1 Abhd2
Homer1	Cx3cl1	0.866935483870968	1	1	wtNA	NA	wt	Homer1 Cx3cl1
Homer1	Nr4a2	1	0.754032258064516	2	NAhd	NA	NA	Homer1 Nr4a2
Hs3st4	3110035E14Rik	0.975806451612903	1	47	wtNA	NA	NA	Hs3st4 3110035E14Rik
Hs3st4	Adcy2	0.991935483870968	1	51	NAhd	NA	NA	Hs3st4 Adcy2
Hs3st4	Alcam	1	1	51	NAhd	NA	NA	Hs3st4 Alcam
Hs3st4	Ano3	0.979838709677419	1	51	NAhd	NA	hd	Hs3st4 Ano3
Hs3st4	Ano4	0.887096774193548	1	47	wtNA	NA	NA	Hs3st4 Ano4
Hs3st4	C1ql3	0.987903225806452	1	47	wthd	NA	NA	Hs3st4 C1ql3
Hs3st4	Cacna1d	0.883064516129032	1	51	NAhd	NA	NA	Hs3st4 Cacna1d
Hs3st4	Cacna2d3	0.955645161290323	0.956989247311828	51	NAhd	NA	NA	Hs3st4 Cacna2d3
Hs3st4	Cdh18	1	0.997983870967742	47	wthd	NA	NA	Hs3st4 Cdh18
Hs3st4	Chsy3	0.967741935483871	0.995967741935484	47	wtNA	NA	NA	Hs3st4 Chsy3
Hs3st4	Cntnap4	0.987903225806452	1	47	wtNA	NA	wt	Hs3st4 Cntnap4
Hs3st4	Col5a1	0.975806451612903	1	51	NAhd	NA	hd	Hs3st4 Col5a1
Hs3st4	Ctnnd2	1	1	51	NAhd	NA	hd	Hs3st4 Ctnnd2
Hs3st4	D8Ertd82e	0.971774193548387	1	47	wthd	NA	NA	Hs3st4 D8Ertd82e
Hs3st4	Dgkb	0.854838709677419	0.983870967741935	51	NAhd	NA	NA	Hs3st4 Dgkb
Hs3st4	Dlc1	1	1	47	wthd	NA	NA	Hs3st4 Dlc1
Hs3st4	Etl4	0.959677419354839	1	47	wtNA	NA	NA	Hs3st4 Etl4
Hs3st4	Etv5	0.983870967741935	1	51	NAhd	NA	NA	Hs3st4 Etv5
Hs3st4	Fam19a2	0.983870967741935	1	47	wtNA	NA	NA	Hs3st4 Fam19a2
Hs3st4	Foxp2	0.935483870967742	0.979838709677419	51	NAhd	NA	NA	Hs3st4 Foxp2
Hs3st4	Frmpd4	1	1	47	wthd	NA	NA	Hs3st4 Frmpd4
Hs3st4	Fstl4	0.879032258064516	1	51	NAhd	NA	NA	Hs3st4 Fstl4
Hs3st4	Galnt9	0.875	1	51	NAhd	NA	NA	Hs3st4 Galnt9
Hs3st4	Garnl3	0.995967741935484	1	47	wthd	NA	NA	Hs3st4 Garnl3
Hs3st4	Gas7	1	1	47	wtNA	NA	NA	Hs3st4 Gas7
Hs3st4	Gm20754	0.971774193548387	0.997983870967742	47	wtNA	NA	NA	Hs3st4 Gm20754
Hs3st4	Gm27247	1	1	47	wtNA	NA	NA	Hs3st4 Gm27247
Hs3st4	Gpc6	0.987903225806452	1	47	wtNA	NA	NA	Hs3st4 Gpc6
Hs3st4	Grid2	0.995967741935484	1	51	NAhd	NA	NA	Hs3st4 Grid2
Hs3st4	Grm5	0.995967741935484	1	47	wthd	NA	NA	Hs3st4 Grm5
Hs3st4	Gsg1l	0.895161290322581	1	51	NAhd	NA	NA	Hs3st4 Gsg1l
Hs3st4	Gtf2ird1	0.895161290322581	1	51	NAhd	NA	hd	Hs3st4 Gtf2ird1
Hs3st4	Hs6st3	1	1	51	NAhd	NA	NA	Hs3st4 Hs6st3
Hs3st4	Itga8	0.891129032258065	1	47	wtNA	NA	NA	Hs3st4 Itga8
Hs3st4	Kcnip4	1	1	47	wtNA	NA	wt	Hs3st4 Kcnip4
Hs3st4	Kctd16	0.850806451612903	1	51	NAhd	NA	NA	Hs3st4 Kctd16
Hs3st4	Kit	0.995967741935484	1	51	NAhd	NA	hd	Hs3st4 Kit
Hs3st4	Lingo2	1	1	47	wtNA	NA	NA	Hs3st4 Lingo2
Hs3st4	Lrrtm4	0.862903225806452	0.971102150537634	47	wtNA	NA	NA	Hs3st4 Lrrtm4
Hs3st4	Mapk4	0.951612903225806	1	47	wtNA	NA	NA	Hs3st4 Mapk4
Hs3st4	Mast4	0.854838709677419	0.997983870967742	47	wtNA	NA	NA	Hs3st4 Mast4
Hs3st4	Mcc	0.858870967741935	1	51	NAhd	NA	NA	Hs3st4 Mcc
Hs3st4	Mgat5	0.979838709677419	1	51	NAhd	NA	NA	Hs3st4 Mgat5
Hs3st4	Nav2	0.971774193548387	1	51	NAhd	NA	NA	Hs3st4 Nav2
Hs3st4	Nebl	0.931451612903226	1	51	NAhd	NA	NA	Hs3st4 Nebl
Hs3st4	Ntng2	0.951612903225806	1	51	NAhd	NA	NA	Hs3st4 Ntng2
Hs3st4	Oprm1	0.923387096774194	1	47	wtNA	NA	NA	Hs3st4 Oprm1
Hs3st4	Otof	0.935483870967742	1	47	wtNA	NA	wt	Hs3st4 Otof
Hs3st4	Pbx1	0.983870967741935	1	51	NAhd	NA	hd	Hs3st4 Pbx1
Hs3st4	Pik3r3	0.891129032258065	1	47	wtNA	NA	wt	Hs3st4 Pik3r3
Hs3st4	Plxna2	0.943548387096774	1	47	wtNA	NA	wt	Hs3st4 Plxna2
Hs3st4	Prkce	0.995967741935484	1	51	NAhd	NA	NA	Hs3st4 Prkce
Hs3st4	Ptk7	0.995967741935484	1	47	wtNA	NA	wt	Hs3st4 Ptk7
Hs3st4	Ptprk	1	0.991935483870968	47	wthd	NA	NA	Hs3st4 Ptprk
Hs3st4	Rai14	1	1	47	wthd	NA	NA	Hs3st4 Rai14
Hs3st4	Rapgef5	1	1	51	NAhd	NA	NA	Hs3st4 Rapgef5
Hs3st4	Rell1	0.991935483870968	1	47	wthd	NA	NA	Hs3st4 Rell1
Hs3st4	Rimbp2	0.891129032258065	1	47	wtNA	NA	wt	Hs3st4 Rimbp2
Hs3st4	Rims1	0.995967741935484	1	47	wtNA	NA	NA	Hs3st4 Rims1
Hs3st4	Robo3	0.870967741935484	1	51	NAhd	NA	NA	Hs3st4 Robo3
Hs3st4	Rtn4rl1	0.955645161290323	1	47	wtNA	NA	wt	Hs3st4 Rtn4rl1
Hs3st4	Scg3	0.979838709677419	0.991935483870968	47	wtNA	NA	wt	Hs3st4 Scg3
Hs3st4	Sema5a	1	1	47	wthd	NA	NA	Hs3st4 Sema5a
Hs3st4	Slc16a10	0.995967741935484	1	51	NAhd	NA	hd	Hs3st4 Slc16a10
Hs3st4	Slc16a2	0.854838709677419	1	47	wtNA	NA	wt	Hs3st4 Slc16a2
Hs3st4	Slc1a2	0.995967741935484	1	51	NAhd	NA	NA	Hs3st4 Slc1a2
Hs3st4	Slc24a4	0.987903225806452	1	51	NAhd	NA	NA	Hs3st4 Slc24a4
Hs3st4	Slc26a4	0.887096774193548	1	51	NAhd	NA	NA	Hs3st4 Slc26a4
Hs3st4	Slc35f1	1	1	51	NAhd	NA	hd	Hs3st4 Slc35f1
Hs3st4	Slc8a1	0.94758064516129	1	47	wtNA	NA	NA	Hs3st4 Slc8a1
Hs3st4	Slc9a9	0.870967741935484	1	47	wthd	NA	NA	Hs3st4 Slc9a9
Hs3st4	Slit2	0.987903225806452	1	51	NAhd	NA	hd	Hs3st4 Slit2
Hs3st4	Slit3	0.862903225806452	1	51	NAhd	NA	NA	Hs3st4 Slit3
Hs3st4	Smad3	0.939516129032258	1	47	wtNA	NA	wt	Hs3st4 Smad3
Hs3st4	Sorbs2os	0.858870967741935	1	51	NAhd	NA	NA	Hs3st4 Sorbs2os
Hs3st4	Sorcs3	1	1	47	wtNA	NA	wt	Hs3st4 Sorcs3
Hs3st4	Srgap3	1	1	47	wtNA	NA	wt	Hs3st4 Srgap3
Hs3st4	Tenm4	0.995967741935484	1	47	wthd	NA	NA	Hs3st4 Tenm4
Hs3st4	Tmem178	0.987903225806452	1	47	wtNA	NA	NA	Hs3st4 Tmem178
Hs3st4	Tmem178b	0.911290322580645	1	47	wthd	NA	NA	Hs3st4 Tmem178b
Hs3st4	Xkr4	0.975806451612903	1	51	NAhd	NA	NA	Hs3st4 Xkr4
Hs3st4	Zcchc16	0.907258064516129	1	47	wtNA	NA	NA	Hs3st4 Zcchc16
Hs3st4	Zfpm2	1	0.995967741935484	47	wthd	NA	NA	Hs3st4 Zfpm2
Hs6st3	March1	1	0.995967741935484	35	wthd	NA	NA	Hs6st3 March1
Hs6st3	9630028H03Rik	1	1	35	wtNA	NA	wt	Hs6st3 9630028H03Rik
Hs6st3	A330008L17Rik	0.883064516129032	1	35	wtNA	NA	NA	Hs6st3 A330008L17Rik
Hs6st3	A830018L16Rik	0.963709677419355	1	38	NAhd	NA	NA	Hs6st3 A830018L16Rik
Hs6st3	A830036E02Rik	0.967741935483871	1	38	NAhd	NA	hd	Hs6st3 A830036E02Rik
Hs6st3	Actn2	0.987903225806452	1	35	wthd	NA	NA	Hs6st3 Actn2
Hs6st3	Adam12	0.975806451612903	1	35	wtNA	NA	NA	Hs6st3 Adam12
Hs6st3	Ahi1	1	1	38	NAhd	NA	NA	Hs6st3 Ahi1
Hs6st3	Atp2b1	0.975806451612903	1	35	wtNA	NA	NA	Hs6st3 Atp2b1
Hs6st3	Brinp1	0.975806451612903	1	38	NAhd	NA	NA	Hs6st3 Brinp1
Hs6st3	Cadm2	0.991935483870968	1	35	wthd	NA	NA	Hs6st3 Cadm2
Hs6st3	Cnr1	1	0.935483870967742	35	wtNA	NA	wt	Hs6st3 Cnr1
Hs6st3	Cntn3	0.987903225806452	1	38	NAhd	NA	NA	Hs6st3 Cntn3
Hs6st3	Dgkb	0.854838709677419	0.653225806451613	35	wtNA	NA	NA	Hs6st3 Dgkb
Hs6st3	Dok6	0.866935483870968	1	35	wtNA	NA	wt	Hs6st3 Dok6
Hs6st3	Dpyd	0.854838709677419	1	35	wtNA	NA	NA	Hs6st3 Dpyd
Hs6st3	Dscaml1	0.991935483870968	1	38	NAhd	NA	NA	Hs6st3 Dscaml1
Hs6st3	Frmd5	0.92741935483871	1	35	wthd	NA	NA	Hs6st3 Frmd5
Hs6st3	Galnt16	0.983870967741935	1	35	wtNA	NA	wt	Hs6st3 Galnt16
Hs6st3	Galntl6	0.92741935483871	1	35	wthd	NA	NA	Hs6st3 Galntl6
Hs6st3	Gda	0.915322580645161	1	35	wthd	NA	NA	Hs6st3 Gda
Hs6st3	Gpr158	0.939516129032258	1	38	NAhd	NA	NA	Hs6st3 Gpr158
Hs6st3	Grik4	1	1	35	wthd	NA	NA	Hs6st3 Grik4
Hs6st3	Grm1	0.870967741935484	1	38	NAhd	NA	hd	Hs6st3 Grm1
Hs6st3	Hs3st4	0.907258064516129	0.51747311827957	35	wtNA	NA	NA	Hs6st3 Hs3st4
Hs6st3	Itga9	0.987903225806452	1	38	NAhd	NA	NA	Hs6st3 Itga9
Hs6st3	Itpr1	0.907258064516129	1	38	NAhd	NA	hd	Hs6st3 Itpr1
Hs6st3	Kcnd2	0.995967741935484	1	38	NAhd	NA	NA	Hs6st3 Kcnd2
Hs6st3	Klhl3	0.92741935483871	1	35	wtNA	NA	NA	Hs6st3 Klhl3
Hs6st3	Ksr1	0.991935483870968	1	35	wthd	NA	NA	Hs6st3 Ksr1
Hs6st3	Ldlrad4	0.94758064516129	1	38	NAhd	NA	hd	Hs6st3 Ldlrad4
Hs6st3	Lrfn2	1	1	35	wthd	NA	NA	Hs6st3 Lrfn2
Hs6st3	Mctp1	0.870967741935484	1	38	NAhd	NA	hd	Hs6st3 Mctp1
Hs6st3	Ncald	0.955645161290323	1	38	NAhd	NA	NA	Hs6st3 Ncald
Hs6st3	Nell1	0.951612903225806	1	38	NAhd	NA	NA	Hs6st3 Nell1
Hs6st3	Nhs	0.971774193548387	1	35	wtNA	NA	wt	Hs6st3 Nhs
Hs6st3	Nkain2	0.995967741935484	1	35	wthd	NA	NA	Hs6st3 Nkain2
Hs6st3	Nrg1	0.883064516129032	1	38	NAhd	NA	NA	Hs6st3 Nrg1
Hs6st3	Ntm	1	1	35	wthd	NA	NA	Hs6st3 Ntm
Hs6st3	Pde4d	0.975806451612903	1	35	wtNA	NA	NA	Hs6st3 Pde4d
Hs6st3	Pdzrn3	0.866935483870968	0.787634408602151	35	wtNA	NA	NA	Hs6st3 Pdzrn3
Hs6st3	Pdzrn4	0.939516129032258	1	35	wthd	NA	NA	Hs6st3 Pdzrn4
Hs6st3	Plcb1	1	1	38	NAhd	NA	NA	Hs6st3 Plcb1
Hs6st3	Pld5	1	1	35	wthd	NA	NA	Hs6st3 Pld5
Hs6st3	Prkg1	0.987903225806452	1	38	NAhd	NA	NA	Hs6st3 Prkg1
Hs6st3	Rgs7bp	0.891129032258065	1	35	wthd	NA	NA	Hs6st3 Rgs7bp
Hs6st3	Rora	1	1	35	wthd	NA	NA	Hs6st3 Rora
Hs6st3	RP23-231J2.1	0.94758064516129	1	38	NAhd	NA	hd	Hs6st3 RP23-231J2.1
Hs6st3	Ryr3	0.951612903225806	1	35	wtNA	NA	NA	Hs6st3 Ryr3
Hs6st3	Sgpp2	1	1	35	wthd	NA	NA	Hs6st3 Sgpp2
Hs6st3	Sorcs3	0.991935483870968	1	35	wtNA	NA	wt	Hs6st3 Sorcs3
Hs6st3	Srgap1	1	1	35	wthd	NA	NA	Hs6st3 Srgap1
Hs6st3	Syndig1l	0.899193548387097	1	35	wtNA	NA	NA	Hs6st3 Syndig1l
Hs6st3	Tenm1	0.850806451612903	1	35	wthd	NA	NA	Hs6st3 Tenm1
Hs6st3	Trpm3	0.991935483870968	1	38	NAhd	NA	hd	Hs6st3 Trpm3
Il1rapl1	Nlgn1	0.919354838709677	0.59005376344086	1	NAhd	hd	NA	Il1rapl1 Nlgn1
Il1rapl2	Agbl4	0.983870967741935	1	3	NAhd	NA	NA	Il1rapl2 Agbl4
Il1rapl2	Elavl2	0.995967741935484	0.997983870967742	3	NAhd	NA	NA	Il1rapl2 Elavl2
Il1rapl2	Slc24a3	0.866935483870968	0.899193548387097	1	wthd	NA	NA	Il1rapl2 Slc24a3
Kcnab1	A330015K06Rik	1	1	6	wthd	NA	NA	Kcnab1 A330015K06Rik
Kcnab1	Cabp1	0.975806451612903	1	6	wtNA	NA	NA	Kcnab1 Cabp1
Kcnab1	Flrt2	0.995967741935484	1	6	wtNA	NA	NA	Kcnab1 Flrt2
Kcnab1	Grip1	0.870967741935484	1	6	wtNA	NA	NA	Kcnab1 Grip1
Kcnab1	Smyd3	0.887096774193548	1	6	wthd	NA	NA	Kcnab1 Smyd3
Kcnab1	Tmem196	0.870967741935484	1	6	wtNA	NA	NA	Kcnab1 Tmem196
Kcnb2	Lrfn5	0.983870967741935	1	1	wtNA	NA	wt	Kcnb2 Lrfn5
Kcnh7	Cadm2	0.935483870967742	0.602150537634409	1	NAhd	NA	NA	Kcnh7 Cadm2
Kcnip4	Cntn3	0.979838709677419	1	5	wtNA	wt	NA	Kcnip4 Cntn3
Kcnip4	Kcnb2	0.939516129032258	1	5	wtNA	wt	NA	Kcnip4 Kcnb2
Kcnip4	Man1c1	0.951612903225806	1	5	wtNA	wt	NA	Kcnip4 Man1c1
Kcnip4	Tmem108	0.854838709677419	1	5	wtNA	wt	NA	Kcnip4 Tmem108
Kcnip4	Zfp385b	0.987903225806452	0.995967741935484	5	wtNA	wt	NA	Kcnip4 Zfp385b
Kcnk2	Pdzd2	0.895161290322581	1	1	wtNA	NA	NA	Kcnk2 Pdzd2
Kcnq1	Kcnq1ot1	0.862903225806452	1	1	wtNA	NA	wt	Kcnq1 Kcnq1ot1
Kcnq5	Mkx	0.975806451612903	1	1	wtNA	NA	NA	Kcnq5 Mkx
Kctd16	2900055J20Rik	1	1	1	NAhd	NA	NA	Kctd16 2900055J20Rik
Kctd16	Sorbs2	0.975806451612903	1	1	wtNA	NA	NA	Kctd16 Sorbs2
Kctd8	Grm3	1	0.82258064516129	1	wtNA	NA	NA	Kctd8 Grm3
Khdrbs2	Gpc6	1	0.995967741935484	2	wtNA	wt	NA	Khdrbs2 Gpc6
Khdrbs2	Zbtb20	0.943548387096774	0.973118279569892	2	wtNA	wt	NA	Khdrbs2 Zbtb20
Khdrbs3	Cdh11	0.911290322580645	1	1	NAhd	NA	NA	Khdrbs3 Cdh11
Khdrbs3	Etv5	0.991935483870968	1	2	wtNA	NA	NA	Khdrbs3 Etv5
Khdrbs3	Sh3kbp1	0.967741935483871	1	2	wtNA	NA	NA	Khdrbs3 Sh3kbp1
Kirrel3	Cntnap5a	1	0.959677419354839	1	wthd	NA	NA	Kirrel3 Cntnap5a
Kirrel3	Pcdh9	0.991935483870968	0.563172043010753	2	NAhd	NA	NA	Kirrel3 Pcdh9
Ldb2	Gm43507	1	1	1	wthd	NA	NA	Ldb2 Gm43507
Lingo2	2700069I18Rik	0.983870967741935	0.987903225806452	52	NAhd	NA	hd	Lingo2 2700069I18Rik
Lingo2	Adgrb3	0.911290322580645	1	52	NAhd	NA	NA	Lingo2 Adgrb3
Lingo2	Adora2a	1	0.951612903225806	52	NAhd	NA	NA	Lingo2 Adora2a
Lingo2	Arhgap26	0.931451612903226	0.995967741935484	52	NAhd	NA	NA	Lingo2 Arhgap26
Lingo2	Cdh7	0.879032258064516	0.918682795698925	52	NAhd	NA	hd	Lingo2 Cdh7
Lingo2	Chrm3	1	1	20	wtNA	NA	NA	Lingo2 Chrm3
Lingo2	Cntnap3	0.935483870967742	1	20	wtNA	NA	wt	Lingo2 Cntnap3
Lingo2	Cntnap5c	0.907258064516129	1	20	wthd	NA	NA	Lingo2 Cntnap5c
Lingo2	Csmd1	0.870967741935484	1	52	NAhd	NA	NA	Lingo2 Csmd1
Lingo2	Cux2	0.899193548387097	0.997983870967742	52	NAhd	NA	NA	Lingo2 Cux2
Lingo2	Dlg2	1	1	20	wtNA	NA	NA	Lingo2 Dlg2
Lingo2	Dlgap1	0.883064516129032	1	52	NAhd	NA	NA	Lingo2 Dlgap1
Lingo2	Dmd	0.995967741935484	1	20	wtNA	NA	wt	Lingo2 Dmd
Lingo2	Drd1	1	1	20	wtNA	NA	NA	Lingo2 Drd1
Lingo2	Drd2	1	0.909274193548387	52	NAhd	NA	NA	Lingo2 Drd2
Lingo2	Dscam	1	0.997983870967742	52	NAhd	NA	NA	Lingo2 Dscam
Lingo2	Ebf1	1	1	20	wthd	NA	NA	Lingo2 Ebf1
Lingo2	Enpp2	0.875	0.995295698924731	52	NAhd	NA	hd	Lingo2 Enpp2
Lingo2	Ephb1	1	1	20	wthd	NA	NA	Lingo2 Ephb1
Lingo2	Fam155a	1	1	20	wthd	NA	NA	Lingo2 Fam155a
Lingo2	Foxp2	0.955645161290323	1	52	NAhd	NA	NA	Lingo2 Foxp2
Lingo2	Gm28928	1	0.993951612903226	52	NAhd	NA	NA	Lingo2 Gm28928
Lingo2	Grik2	0.971774193548387	1	20	wtNA	NA	NA	Lingo2 Grik2
Lingo2	Grik3	1	1	20	wtNA	NA	NA	Lingo2 Grik3
Lingo2	Hs3st4	0.983870967741935	0.983870967741935	52	NAhd	NA	NA	Lingo2 Hs3st4
Lingo2	Il1rapl2	1	0.975806451612903	52	NAhd	NA	NA	Lingo2 Il1rapl2
Lingo2	Kcnb2	0.995967741935484	1	20	wthd	NA	NA	Lingo2 Kcnb2
Lingo2	Kcnk2	0.995967741935484	1	20	wtNA	NA	NA	Lingo2 Kcnk2
Lingo2	Man1c1	0.92741935483871	1	20	wthd	NA	NA	Lingo2 Man1c1
Lingo2	Mpped2	0.935483870967742	1	20	wthd	NA	NA	Lingo2 Mpped2
Lingo2	Nfib	0.979838709677419	0.995967741935484	52	NAhd	NA	NA	Lingo2 Nfib
Lingo2	Nrg3	1	0.564516129032258	52	NAhd	NA	NA	Lingo2 Nrg3
Lingo2	Nrxn1	1	1	20	wtNA	NA	NA	Lingo2 Nrxn1
Lingo2	Oprd1	1	0.973790322580645	52	NAhd	NA	NA	Lingo2 Oprd1
Lingo2	Pdzrn3	1	0.995967741935484	52	NAhd	NA	NA	Lingo2 Pdzrn3
Lingo2	Penk	0.891129032258065	0.995967741935484	20	wthd	NA	NA	Lingo2 Penk
Lingo2	Phactr1	0.895161290322581	0.997311827956989	52	NAhd	NA	NA	Lingo2 Phactr1
Lingo2	Pparg	0.911290322580645	0.98991935483871	52	NAhd	NA	NA	Lingo2 Pparg
Lingo2	Prkca	1	1	20	wthd	NA	NA	Lingo2 Prkca
Lingo2	Ptn	0.915322580645161	1	52	NAhd	NA	hd	Lingo2 Ptn
Lingo2	Ptprm	1	0.983870967741935	52	NAhd	NA	NA	Lingo2 Ptprm
Lingo2	Ptprt	1	1	20	wthd	NA	NA	Lingo2 Ptprt
Lingo2	Rasgrf1	1	0.977822580645161	52	NAhd	NA	NA	Lingo2 Rasgrf1
Lingo2	Rasgrf2	1	0.995967741935484	52	NAhd	NA	NA	Lingo2 Rasgrf2
Lingo2	Rgs6	0.987903225806452	0.991263440860215	52	NAhd	NA	NA	Lingo2 Rgs6
Lingo2	Sema3e	0.899193548387097	0.997311827956989	52	NAhd	NA	NA	Lingo2 Sema3e
Lingo2	Sez6	0.959677419354839	0.991935483870968	52	NAhd	NA	NA	Lingo2 Sez6
Lingo2	Sgcz	0.955645161290323	1	20	wthd	NA	NA	Lingo2 Sgcz
Lingo2	Slit1	0.903225806451613	0.995967741935484	52	NAhd	NA	NA	Lingo2 Slit1
Lingo2	Sncaip	1	0.923387096774194	52	NAhd	NA	NA	Lingo2 Sncaip
Lingo2	Sntg2	1	0.98991935483871	52	NAhd	NA	hd	Lingo2 Sntg2
Lingo2	Sox5	0.983870967741935	0.997983870967742	52	NAhd	NA	NA	Lingo2 Sox5
Lingo2	Sphkap	0.943548387096774	1	52	NAhd	NA	NA	Lingo2 Sphkap
Lingo2	Stxbp6	0.887096774193548	0.993951612903226	52	NAhd	NA	NA	Lingo2 Stxbp6
Lingo2	Syt6	0.983870967741935	0.993951612903226	52	NAhd	NA	NA	Lingo2 Syt6
Lingo2	Trpc5	0.875	1	52	NAhd	NA	NA	Lingo2 Trpc5
Lingo2	Trps1	0.995967741935484	1	52	NAhd	NA	NA	Lingo2 Trps1
Lingo2	Unc5c	0.883064516129032	1	52	NAhd	NA	NA	Lingo2 Unc5c
Lingo2	Xylt1	0.858870967741935	0.975134408602151	52	NAhd	NA	NA	Lingo2 Xylt1
Lingo2	Zcchc16	1	1	52	NAhd	NA	NA	Lingo2 Zcchc16
Lingo2	Zfhx4	1	0.828629032258065	52	NAhd	NA	NA	Lingo2 Zfhx4
Lrrc4c	4930445B16Rik	1	1	2	wthd	NA	NA	Lrrc4c 4930445B16Rik
Lrrc4c	Tenm2	1	0.915322580645161	2	wtNA	NA	NA	Lrrc4c Tenm2
Lrrtm4	Slit3	0.987903225806452	0.991935483870968	1	wtNA	NA	NA	Lrrtm4 Slit3
Lsamp	Csmd3	0.858870967741935	0.995967741935484	1	NAhd	NA	NA	Lsamp Csmd3
Malat1	Park2	0.915322580645161	0.986559139784946	2	NAhd	NA	hd	Malat1 Park2
Malat1	Ptprn2	0.967741935483871	1	1	wtNA	NA	NA	Malat1 Ptprn2
Malat1	Serinc2	0.891129032258065	0.845430107526882	2	NAhd	NA	hd	Malat1 Serinc2
Mapt	Snrnp70	0.887096774193548	1	1	wtNA	NA	NA	Mapt Snrnp70
Mast4	Tmem196	0.911290322580645	1	1	wtNA	NA	NA	Mast4 Tmem196
Mblac2	PISD	0.879032258064516	0.704301075268817	1	NAhd	NA	NA	Mblac2 PISD
Meg3	4930402H24Rik	0.995967741935484	1	19	wtNA	NA	wt	Meg3 4930402H24Rik
Meg3	A830036E02Rik	0.879032258064516	1	16	NAhd	NA	hd	Meg3 A830036E02Rik
Meg3	Ahi1	0.951612903225806	1	19	wtNA	NA	NA	Meg3 Ahi1
Meg3	Arhgef25	0.903225806451613	1	16	NAhd	NA	NA	Meg3 Arhgef25
Meg3	Camk4	0.995967741935484	1	19	wtNA	NA	wt	Meg3 Camk4
Meg3	Clasp2	0.967741935483871	1	16	NAhd	NA	hd	Meg3 Clasp2
Meg3	Cstf3	0.850806451612903	1	16	NAhd	NA	NA	Meg3 Cstf3
Meg3	Dock9	0.854838709677419	1	19	wtNA	NA	NA	Meg3 Dock9
Meg3	Emid1	0.939516129032258	1	16	NAhd	NA	NA	Meg3 Emid1
Meg3	Fam212b	0.935483870967742	1	16	NAhd	NA	hd	Meg3 Fam212b
Meg3	Gm13944	0.94758064516129	1	16	NAhd	NA	NA	Meg3 Gm13944
Meg3	Gm21092	0.875	1	19	wtNA	NA	wt	Meg3 Gm21092
Meg3	Gm21954	0.951612903225806	1	19	wtNA	NA	wt	Meg3 Gm21954
Meg3	Gm30382	0.915322580645161	1	16	NAhd	NA	NA	Meg3 Gm30382
Meg3	Gm42418	0.883064516129032	1	16	NAhd	NA	NA	Meg3 Gm42418
Meg3	Gnb5	0.895161290322581	1	19	wtNA	NA	NA	Meg3 Gnb5
Meg3	Immp1l	0.911290322580645	1	16	NAhd	NA	NA	Meg3 Immp1l
Meg3	Klhdc10	0.850806451612903	1	19	wtNA	NA	NA	Meg3 Klhdc10
Meg3	Mblac2	0.991935483870968	1	19	wtNA	NA	NA	Meg3 Mblac2
Meg3	Mirg	1	1	19	wthd	NA	NA	Meg3 Mirg
Meg3	Nwd2	0.887096774193548	1	19	wtNA	NA	NA	Meg3 Nwd2
Meg3	Olfm1	0.895161290322581	1	19	wtNA	NA	NA	Meg3 Olfm1
Meg3	Pcsk2os2	0.915322580645161	1	16	NAhd	NA	NA	Meg3 Pcsk2os2
Meg3	Pgbd5	0.951612903225806	1	16	NAhd	NA	hd	Meg3 Pgbd5
Meg3	Ptprk	0.931451612903226	0.994623655913979	19	wtNA	NA	NA	Meg3 Ptprk
Meg3	Rasgrf1	1	1	19	wtNA	NA	NA	Meg3 Rasgrf1
Meg3	Rtn3	0.911290322580645	0.993951612903226	19	wtNA	NA	NA	Meg3 Rtn3
Meg3	Scn4b	0.883064516129032	0.997983870967742	19	wtNA	NA	NA	Meg3 Scn4b
Meg3	Skap2	0.939516129032258	1	19	wtNA	NA	wt	Meg3 Skap2
Meg3	Slc17a7	0.987903225806452	0.995967741935484	19	wtNA	NA	NA	Meg3 Slc17a7
Meg3	Slc8a2	0.92741935483871	1	16	NAhd	NA	hd	Meg3 Slc8a2
Meg3	Sv2b	0.955645161290323	1	19	wtNA	NA	NA	Meg3 Sv2b
Meg3	Syn2	0.943548387096774	1	16	NAhd	NA	hd	Meg3 Syn2
Meg3	Tmod1	0.907258064516129	1	16	NAhd	NA	hd	Meg3 Tmod1
Meis2	5730522E02Rik	0.891129032258065	1	6	NAhd	NA	hd	Meis2 5730522E02Rik
Meis2	Anks1b	0.850806451612903	1	6	NAhd	NA	NA	Meis2 Anks1b
Meis2	Hs6st2	0.931451612903226	1	6	NAhd	NA	hd	Meis2 Hs6st2
Meis2	Mgat4c	0.850806451612903	0.958333333333333	6	NAhd	NA	NA	Meis2 Mgat4c
Meis2	Tmem200a	0.923387096774194	1	6	NAhd	NA	NA	Meis2 Tmem200a
Meis2	Zcchc16	1	1	6	NAhd	NA	NA	Meis2 Zcchc16
Mid1	Erdr1	0.991935483870968	0.604838709677419	1	wtNA	NA	NA	Mid1 Erdr1
Mpp6	Dfna5	1	0.987903225806452	1	wthd	NA	NA	Mpp6 Dfna5
Nav3	Syt1	0.915322580645161	1	1	wtNA	NA	NA	Nav3 Syt1
Ndst4	Abi3bp	1	1	7	wtNA	NA	wt	Ndst4 Abi3bp
Ndst4	Crtac1	0.951612903225806	1	7	wtNA	NA	NA	Ndst4 Crtac1
Ndst4	Dok6	0.995967741935484	1	7	wtNA	NA	wt	Ndst4 Dok6
Ndst4	E130114P18Rik	1	0.955645161290323	7	wtNA	NA	NA	Ndst4 E130114P18Rik
Ndst4	Emid1	1	1	7	wtNA	NA	NA	Ndst4 Emid1
Ndst4	Lmo7	0.971774193548387	1	7	wtNA	NA	NA	Ndst4 Lmo7
Ndst4	Trps1	0.875	1	1	NAhd	NA	NA	Ndst4 Trps1
Ndst4	Ust	0.854838709677419	1	7	wtNA	NA	NA	Ndst4 Ust
Necab3	1700003F12Rik	1	0.536290322580645	1	wthd	NA	NA	Necab3 1700003F12Rik
Negr1	Ptprn2	0.870967741935484	0.983870967741935	1	NAhd	hd	NA	Negr1 Ptprn2
Nell1	Nell1os	1	1	1	wthd	NA	NA	Nell1 Nell1os
Nfia	Ajap1	0.895161290322581	1	14	NAhd	NA	hd	Nfia Ajap1
Nfia	Ano4	0.971774193548387	1	14	NAhd	NA	NA	Nfia Ano4
Nfia	Caln1	0.854838709677419	1	14	NAhd	NA	NA	Nfia Caln1
Nfia	E130114P18Rik	1	0.967741935483871	3	wthd	NA	NA	Nfia E130114P18Rik
Nfia	Ext1	0.971774193548387	0.970430107526882	3	wtNA	NA	NA	Nfia Ext1
Nfia	Foxn3	0.995967741935484	1	14	NAhd	NA	NA	Nfia Foxn3
Nfia	Gab2	0.935483870967742	1	14	NAhd	NA	NA	Nfia Gab2
Nfia	Gas7	0.850806451612903	1	14	NAhd	NA	NA	Nfia Gas7
Nfia	Gpc6	0.870967741935484	0.942204301075269	14	NAhd	NA	NA	Nfia Gpc6
Nfia	Grik4	0.991935483870968	1	14	NAhd	NA	NA	Nfia Grik4
Nfia	Kcnn2	0.911290322580645	1	14	NAhd	NA	hd	Nfia Kcnn2
Nfia	Neto1	0.955645161290323	1	14	NAhd	NA	NA	Nfia Neto1
Nfia	Nin	1	1	14	NAhd	NA	NA	Nfia Nin
Nfia	Prmt8	0.951612903225806	1	14	NAhd	NA	hd	Nfia Prmt8
Nfia	Rev3l	0.919354838709677	1	14	NAhd	NA	NA	Nfia Rev3l
Nfia	Xylt1	0.967741935483871	0.98252688172043	3	wtNA	NA	NA	Nfia Xylt1
Nfib	Nfia	1	0.995967741935484	1	wtNA	NA	NA	Nfib Nfia
Nkain2	Afap1l1	0.919354838709677	1	5	wtNA	NA	wt	Nkain2 Afap1l1
Nkain2	Cpne9	0.92741935483871	1	5	wtNA	NA	NA	Nkain2 Cpne9
Nkain2	Fam155a	0.883064516129032	1	5	wtNA	NA	NA	Nkain2 Fam155a
Nkain2	Grik2	0.991935483870968	0.995967741935484	5	wtNA	NA	NA	Nkain2 Grik2
Nkain2	Robo3	0.866935483870968	1	5	wtNA	NA	NA	Nkain2 Robo3
Nr4a2	Rxfp1	0.919354838709677	0.995967741935484	1	wtNA	NA	NA	Nr4a2 Rxfp1
Nrg1	Ano2	0.887096774193548	1	3	wtNA	NA	NA	Nrg1 Ano2
Nrg1	Mpp7	0.899193548387097	1	1	NAhd	NA	NA	Nrg1 Mpp7
Nrg1	Ppp3ca	0.866935483870968	0.850806451612903	3	wtNA	NA	wt	Nrg1 Ppp3ca
Nrg1	Sorcs1	0.854838709677419	0.987903225806452	3	wtNA	NA	NA	Nrg1 Sorcs1
Nrg3	Adora2a	1	0.512096774193548	5	wtNA	NA	NA	Nrg3 Adora2a
Nrg3	Drd2	1	0.969758064516129	5	wtNA	NA	NA	Nrg3 Drd2
Nrg3	Egfem1	0.939516129032258	1	2	NAhd	NA	NA	Nrg3 Egfem1
Nrg3	Nrg3os	1	0.995967741935484	5	wthd	NA	NA	Nrg3 Nrg3os
Nrg3	RP24-134N2.1	0.850806451612903	1	5	wtNA	NA	NA	Nrg3 RP24-134N2.1
Nrg3	Sgcz	1	1	5	wtNA	NA	NA	Nrg3 Sgcz
Nrxn3	Lcp1	0.955645161290323	0.973118279569892	2	wtNA	NA	wt	Nrxn3 Lcp1
Nrxn3	Maml3	0.919354838709677	1	2	wtNA	NA	wt	Nrxn3 Maml3
Nrxn3	Rims2	0.899193548387097	1	1	NAhd	NA	NA	Nrxn3 Rims2
Ntng1	Adamts6	0.975806451612903	1	3	wthd	NA	NA	Ntng1 Adamts6
Ntng1	Lpp	0.915322580645161	1	3	wtNA	NA	NA	Ntng1 Lpp
Ntng1	Prickle2	0.858870967741935	1	3	NAhd	NA	NA	Ntng1 Prickle2
Ntng1	Ryr2	0.991935483870968	1	3	NAhd	NA	NA	Ntng1 Ryr2
Ntng1	Zeb2	0.887096774193548	1	3	wtNA	NA	NA	Ntng1 Zeb2
Ntng2	B3gat2	0.94758064516129	1	11	wtNA	NA	wt	Ntng2 B3gat2
Ntng2	Cacna1a	0.971774193548387	0.995967741935484	11	wtNA	NA	NA	Ntng2 Cacna1a
Ntng2	Galnt14	0.911290322580645	0.983870967741935	11	wtNA	NA	wt	Ntng2 Galnt14
Ntng2	Gnb4	0.975806451612903	0.568548387096774	11	wtNA	NA	NA	Ntng2 Gnb4
Ntng2	Mgat5	0.903225806451613	1	11	wtNA	NA	NA	Ntng2 Mgat5
Ntng2	Oprk1	1	1	11	wtNA	NA	NA	Ntng2 Oprk1
Ntng2	Rasa3	0.866935483870968	1	11	wtNA	NA	wt	Ntng2 Rasa3
Ntng2	Rgs12	0.903225806451613	1	11	wtNA	NA	wt	Ntng2 Rgs12
Ntng2	Rims2	0.971774193548387	1	11	wtNA	NA	NA	Ntng2 Rims2
Ntng2	Tmcc3	0.919354838709677	1	11	wtNA	NA	NA	Ntng2 Tmcc3
Ntng2	Tmem163	0.959677419354839	0.544354838709677	11	wtNA	NA	NA	Ntng2 Tmem163
Ntrk2	Dclk1	0.995967741935484	0.92741935483871	13	wtNA	NA	NA	Ntrk2 Dclk1
Ntrk2	Dnajc1	0.870967741935484	0.991263440860215	13	wtNA	NA	NA	Ntrk2 Dnajc1
Ntrk2	Etv5	0.911290322580645	0.995967741935484	13	wtNA	NA	NA	Ntrk2 Etv5
Ntrk2	Hivep2	1	0.616935483870968	13	wtNA	NA	NA	Ntrk2 Hivep2
Ntrk2	Homer1	0.879032258064516	0.997983870967742	13	wthd	NA	NA	Ntrk2 Homer1
Ntrk2	Maml3	0.995967741935484	1	13	wtNA	NA	wt	Ntrk2 Maml3
Ntrk2	Osbpl8	1	0.963709677419355	13	wtNA	NA	NA	Ntrk2 Osbpl8
Ntrk2	Pde10a	1	0.800403225806452	13	wtNA	NA	NA	Ntrk2 Pde10a
Ntrk2	Pde7b	0.915322580645161	0.741263440860215	13	wtNA	NA	NA	Ntrk2 Pde7b
Ntrk2	R3hdm1	0.991935483870968	0.957661290322581	13	wtNA	NA	wt	Ntrk2 R3hdm1
Ntrk2	Slc2a13	1	0.756048387096774	13	wtNA	NA	wt	Ntrk2 Slc2a13
Ntrk2	Ubash3b	0.971774193548387	1	13	wtNA	NA	wt	Ntrk2 Ubash3b
Ntrk2	Zdhhc14	1	0.915322580645161	13	wtNA	NA	NA	Ntrk2 Zdhhc14
Nxph1	Dkk2	0.939516129032258	1	3	wtNA	wt	wt	Nxph1 Dkk2
Nxph1	Lcp1	0.858870967741935	0.995967741935484	3	wtNA	wt	wt	Nxph1 Lcp1
Nxph1	Tbc1d23	0.983870967741935	1	3	wtNA	wt	wt	Nxph1 Tbc1d23
Olfm3	Neto2	0.971774193548387	1	1	wtNA	NA	wt	Olfm3 Neto2
Opcml	Msra	0.963709677419355	1	1	NAhd	NA	NA	Opcml Msra
Oprm1	Ipcef1	1	1	1	wthd	NA	NA	Oprm1 Ipcef1
Pbx3	Reln	0.995967741935484	0.935483870967742	1	wtNA	NA	NA	Pbx3 Reln
Pcdh15	cellType_Ex	0.951612903225806	0.521505376344086	3	wthd	NA	NA	Pcdh15 cellType_Ex
Pcdh15	Ebf4	0.915322580645161	1	5	NAhd	NA	hd	Pcdh15 Ebf4
Pcdh15	Gnal	0.995967741935484	0.550403225806452	5	NAhd	NA	NA	Pcdh15 Gnal
Pcdh15	Gria4	0.979838709677419	0.977822580645161	5	NAhd	NA	hd	Pcdh15 Gria4
Pcdh15	Kctd8	0.891129032258065	0.986559139784946	3	wtNA	NA	NA	Pcdh15 Kctd8
Pcdh15	Rbfox1	0.991935483870968	0.957661290322581	5	NAhd	NA	NA	Pcdh15 Rbfox1
Pcdh15	Zfp804b	0.955645161290323	0.997983870967742	3	wtNA	NA	wt	Pcdh15 Zfp804b
Pcdh9	4921534H16Rik	0.979838709677419	1	18	NAhd	NA	NA	Pcdh9 4921534H16Rik
Pcdh9	A230006K03Rik	1	1	18	NAhd	NA	hd	Pcdh9 A230006K03Rik
Pcdh9	Ank2	0.975806451612903	1	18	NAhd	NA	NA	Pcdh9 Ank2
Pcdh9	Arpp21	0.951612903225806	1	18	NAhd	NA	NA	Pcdh9 Arpp21
Pcdh9	Astn2	0.995967741935484	1	18	NAhd	NA	NA	Pcdh9 Astn2
Pcdh9	Brinp1	0.971774193548387	1	18	NAhd	NA	NA	Pcdh9 Brinp1
Pcdh9	Cacna1h	0.854838709677419	1	5	wtNA	NA	NA	Pcdh9 Cacna1h
Pcdh9	Cacnb4	1	1	18	NAhd	NA	NA	Pcdh9 Cacnb4
Pcdh9	Cdh22	0.983870967741935	1	18	NAhd	NA	hd	Pcdh9 Cdh22
Pcdh9	Dlg2	0.963709677419355	1	18	NAhd	NA	NA	Pcdh9 Dlg2
Pcdh9	Fam19a1	0.995967741935484	0.780913978494624	5	wtNA	NA	NA	Pcdh9 Fam19a1
Pcdh9	Gm12160	0.959677419354839	1	5	wtNA	NA	wt	Pcdh9 Gm12160
Pcdh9	Gm16083	0.983870967741935	1	18	NAhd	NA	NA	Pcdh9 Gm16083
Pcdh9	Hecw2	0.94758064516129	1	18	NAhd	NA	hd	Pcdh9 Hecw2
Pcdh9	Kalrn	0.943548387096774	1	18	NAhd	NA	NA	Pcdh9 Kalrn
Pcdh9	Kcnma1	1	1	18	NAhd	NA	NA	Pcdh9 Kcnma1
Pcdh9	Nav3	0.971774193548387	1	18	NAhd	NA	NA	Pcdh9 Nav3
Pcdh9	Rims1	0.854838709677419	1	18	NAhd	NA	NA	Pcdh9 Rims1
Pcdh9	Syt1	0.991935483870968	1	5	wthd	NA	NA	Pcdh9 Syt1
Pcdh9	Syt17	0.895161290322581	1	18	NAhd	NA	NA	Pcdh9 Syt17
Pcdh9	Trpc7	0.879032258064516	1	5	wtNA	NA	NA	Pcdh9 Trpc7
Pcdh9	Ube2e2	0.875	1	18	NAhd	NA	NA	Pcdh9 Ube2e2
Pcsk2	Pcsk2os2	0.983870967741935	1	1	wtNA	NA	NA	Pcsk2 Pcsk2os2
Pde10a	Homer1	0.995967741935484	0.997983870967742	5	wtNA	NA	NA	Pde10a Homer1
Pde10a	Lrrk2	0.959677419354839	0.993951612903226	5	wtNA	NA	wt	Pde10a Lrrk2
Pde10a	Malat1	0.931451612903226	0.885752688172043	3	NAhd	NA	NA	Pde10a Malat1
Pde10a	Matn2	0.911290322580645	1	5	wtNA	NA	wt	Pde10a Matn2
Pde10a	Ntrk2	0.991935483870968	1	3	NAhd	NA	NA	Pde10a Ntrk2
Pde10a	Phactr1	1	0.987903225806452	5	wtNA	NA	NA	Pde10a Phactr1
Pde10a	R3hdm2	0.983870967741935	1	3	NAhd	NA	NA	Pde10a R3hdm2
Pde10a	Upp2	0.915322580645161	1	5	wtNA	NA	wt	Pde10a Upp2
Pde1a	Atp2b4	0.94758064516129	1	3	NAhd	NA	hd	Pde1a Atp2b4
Pde1a	Cntnap2	0.943548387096774	1	4	wtNA	NA	NA	Pde1a Cntnap2
Pde1a	Cttnbp2	0.983870967741935	1	4	wtNA	NA	wt	Pde1a Cttnbp2
Pde1a	Hs6st3	1	0.995967741935484	4	wthd	NA	NA	Pde1a Hs6st3
Pde1a	Scn1a	0.979838709677419	1	4	wtNA	NA	wt	Pde1a Scn1a
Pde1a	Slc4a4	1	1	3	NAhd	NA	NA	Pde1a Slc4a4
Pde4b	Pde1c	0.975806451612903	0.971774193548387	1	wthd	NA	NA	Pde4b Pde1c
Pde4d	Asic2	1	1	3	NAhd	NA	NA	Pde4d Asic2
Pde4d	Epha5	0.92741935483871	1	3	NAhd	NA	NA	Pde4d Epha5
Pde4d	Oprm1	0.951612903225806	1	3	NAhd	NA	NA	Pde4d Oprm1
Pde7b	Foxn3	0.850806451612903	1	4	wtNA	NA	NA	Pde7b Foxn3
Pde7b	Garem	0.931451612903226	1	1	NAhd	NA	hd	Pde7b Garem
Pde7b	Lrrk2	0.967741935483871	0.98991935483871	4	wtNA	NA	wt	Pde7b Lrrk2
Pde7b	Mapk4	0.943548387096774	1	4	wtNA	NA	NA	Pde7b Mapk4
Pde7b	Rgs20	0.987903225806452	1	4	wtNA	NA	NA	Pde7b Rgs20
Pdzrn3	Adrbk2	0.899193548387097	1	24	wtNA	NA	NA	Pdzrn3 Adrbk2
Pdzrn3	Brinp1	0.995967741935484	1	24	wtNA	NA	NA	Pdzrn3 Brinp1
Pdzrn3	Cdh12	1	0.997983870967742	24	wthd	NA	NA	Pdzrn3 Cdh12
Pdzrn3	Cntn3	0.975806451612903	1	24	wtNA	NA	NA	Pdzrn3 Cntn3
Pdzrn3	Col26a1	1	1	24	wtNA	NA	NA	Pdzrn3 Col26a1
Pdzrn3	Cux2	1	1	24	wtNA	NA	NA	Pdzrn3 Cux2
Pdzrn3	D030068K23Rik	0.995967741935484	1	10	NAhd	NA	hd	Pdzrn3 D030068K23Rik
Pdzrn3	Epha10	0.94758064516129	1	24	wtNA	NA	NA	Pdzrn3 Epha10
Pdzrn3	Fbxo34	0.951612903225806	1	24	wthd	NA	NA	Pdzrn3 Fbxo34
Pdzrn3	Glra2	0.923387096774194	1	10	NAhd	NA	hd	Pdzrn3 Glra2
Pdzrn3	Gm26911	1	0.995967741935484	24	wthd	NA	NA	Pdzrn3 Gm26911
Pdzrn3	Gria1	0.850806451612903	0.950268817204301	24	wtNA	NA	NA	Pdzrn3 Gria1
Pdzrn3	Hs6st3	0.959677419354839	0.530913978494624	10	NAhd	NA	NA	Pdzrn3 Hs6st3
Pdzrn3	Kcnb2	0.923387096774194	1	24	wtNA	NA	NA	Pdzrn3 Kcnb2
Pdzrn3	Kcnh5	0.991935483870968	0.995967741935484	24	wthd	NA	NA	Pdzrn3 Kcnh5
Pdzrn3	Mlip	0.995967741935484	1	24	wtNA	NA	NA	Pdzrn3 Mlip
Pdzrn3	Nhsl2	0.971774193548387	1	24	wtNA	NA	NA	Pdzrn3 Nhsl2
Pdzrn3	Nlk	1	0.993951612903226	24	wthd	NA	NA	Pdzrn3 Nlk
Pdzrn3	Nyap2	0.875	1	24	wtNA	NA	wt	Pdzrn3 Nyap2
Pdzrn3	Pcdh17	0.955645161290323	1	24	wtNA	NA	NA	Pdzrn3 Pcdh17
Pdzrn3	Pcsk5	0.862903225806452	0.994623655913978	10	NAhd	NA	NA	Pdzrn3 Pcsk5
Pdzrn3	Ptpru	0.895161290322581	0.995967741935484	24	wtNA	NA	wt	Pdzrn3 Ptpru
Pdzrn3	Rbfox1	0.983870967741935	1	24	wtNA	NA	NA	Pdzrn3 Rbfox1
Pdzrn3	Rgs7	1	1	24	wthd	NA	NA	Pdzrn3 Rgs7
Pdzrn3	Sdk2	0.899193548387097	0.995967741935484	24	wtNA	NA	NA	Pdzrn3 Sdk2
Pdzrn3	Sema3e	0.858870967741935	1	24	wtNA	NA	NA	Pdzrn3 Sema3e
Pdzrn3	Slc35f3	0.895161290322581	1	24	wtNA	NA	wt	Pdzrn3 Slc35f3
Pdzrn3	Unc5d	0.907258064516129	0.983870967741935	24	wtNA	NA	NA	Pdzrn3 Unc5d
Pex5l	4930419G24Rik	1	1	4	wthd	NA	NA	Pex5l 4930419G24Rik
Pex5l	Gm37459	1	1	4	wthd	NA	NA	Pex5l Gm37459
Pex5l	Parm1	0.911290322580645	1	4	wtNA	NA	wt	Pex5l Parm1
Pex5l	Sorl1	0.975806451612903	1	4	wtNA	NA	wt	Pex5l Sorl1
Phactr1	Celf2	0.967741935483871	0.995967741935484	9	NAhd	NA	NA	Phactr1 Celf2
Phactr1	Fgf14	0.975806451612903	0.995967741935484	9	NAhd	NA	NA	Phactr1 Fgf14
Phactr1	Gm13052	0.959677419354839	1	9	NAhd	NA	NA	Phactr1 Gm13052
Phactr1	Gm15810	1	1	2	wthd	NA	NA	Phactr1 Gm15810
Phactr1	Hivep2	0.870967741935484	0.997311827956989	9	NAhd	NA	NA	Phactr1 Hivep2
Phactr1	Myt1l	0.995967741935484	1	9	NAhd	NA	hd	Phactr1 Myt1l
Phactr1	Pde10a	1	1	9	NAhd	NA	NA	Phactr1 Pde10a
Phactr1	Plcb1	0.854838709677419	1	2	wtNA	NA	NA	Phactr1 Plcb1
Phactr1	Ppfibp1	0.903225806451613	1	9	NAhd	NA	NA	Phactr1 Ppfibp1
Phactr1	Rasgrp1	0.870967741935484	1	9	NAhd	NA	hd	Phactr1 Rasgrp1
Pibf1	2610037D02Rik	0.895161290322581	0.711693548387097	1	wtNA	wt	wt	Pibf1 2610037D02Rik
Pid1	Htr2c	0.883064516129032	1	1	wtNA	NA	NA	Pid1 Htr2c
Pik3c2b	Gm28609	0.850806451612903	0.675403225806452	1	wtNA	NA	NA	Pik3c2b Gm28609
PISD	Btaf1	0.959677419354839	0.564516129032258	1	wtNA	NA	NA	PISD Btaf1
PISD	Erdr1	0.955645161290323	1	3	NAhd	NA	NA	PISD Erdr1
PISD	Hjurp	0.967741935483871	1	3	NAhd	NA	hd	PISD Hjurp
PISD	Rap1gapos	0.919354838709677	1	3	NAhd	NA	NA	PISD Rap1gapos
Plcxd3	Cacna2d3	0.911290322580645	0.782930107526882	1	wtNA	NA	NA	Plcxd3 Cacna2d3
Prkg1	Gm27247	0.870967741935484	0.991935483870968	3	wtNA	NA	NA	Prkg1 Gm27247
Prkg1	Klhl1	1	1	6	NAhd	NA	hd	Prkg1 Klhl1
Prkg1	Meis1	1	1	6	NAhd	NA	NA	Prkg1 Meis1
Prkg1	Negr1	1	1	6	NAhd	NA	hd	Prkg1 Negr1
Prkg1	Pde1c	1	0.995967741935484	3	wthd	NA	NA	Prkg1 Pde1c
Prkg1	Ppp1r2	0.979838709677419	1	6	NAhd	NA	NA	Prkg1 Ppp1r2
Prkg1	Sgpp2	0.907258064516129	1	3	wtNA	NA	NA	Prkg1 Sgpp2
Prkg1	Synpo2	1	1	6	NAhd	NA	hd	Prkg1 Synpo2
Ptprd	Arap2	0.987903225806452	1	13	NAhd	NA	NA	Ptprd Arap2
Ptprd	Cacna1a	1	1	13	NAhd	NA	NA	Ptprd Cacna1a
Ptprd	Celf2	0.850806451612903	0.991935483870968	13	NAhd	NA	NA	Ptprd Celf2
Ptprd	Dcx	0.975806451612903	1	2	wtNA	NA	wt	Ptprd Dcx
Ptprd	Echdc1	0.963709677419355	1	13	NAhd	NA	NA	Ptprd Echdc1
Ptprd	Gnb4	0.911290322580645	1	13	NAhd	NA	NA	Ptprd Gnb4
Ptprd	Nrxn1	0.935483870967742	1	13	NAhd	NA	NA	Ptprd Nrxn1
Ptprd	Oprk1	0.850806451612903	1	13	NAhd	NA	NA	Ptprd Oprk1
Ptprd	Prickle2	0.995967741935484	1	13	NAhd	NA	NA	Ptprd Prickle2
Ptprd	Ptprt	0.854838709677419	1	2	wthd	NA	NA	Ptprd Ptprt
Ptprd	Satb1	0.995967741935484	1	13	NAhd	NA	NA	Ptprd Satb1
Ptprd	Tcf4	0.850806451612903	1	13	NAhd	NA	NA	Ptprd Tcf4
Ptprd	Tesc	0.959677419354839	0.997983870967742	13	NAhd	NA	NA	Ptprd Tesc
Ptprd	Zmat4	0.907258064516129	1	13	NAhd	NA	NA	Ptprd Zmat4
Ptprk	Ak5	0.94758064516129	1	5	wtNA	NA	NA	Ptprk Ak5
Ptprk	Nell2	0.987903225806452	1	5	wtNA	NA	NA	Ptprk Nell2
Ptprk	Plcl1	0.971774193548387	1	5	wtNA	NA	NA	Ptprk Plcl1
Ptprk	Rapgef5	1	1	5	wtNA	NA	NA	Ptprk Rapgef5
Ptprk	Smoc2	0.899193548387097	1	5	wtNA	NA	NA	Ptprk Smoc2
Ptprm	Galntl6	1	0.995967741935484	4	NAhd	NA	NA	Ptprm Galntl6
Ptprm	Gnb4	0.862903225806452	1	4	NAhd	NA	NA	Ptprm Gnb4
Ptprm	Kcnk2	0.891129032258065	0.995295698924731	4	NAhd	NA	NA	Ptprm Kcnk2
Ptprm	Necab1	0.991935483870968	1	4	NAhd	NA	NA	Ptprm Necab1
Rap1gapos	Slc24a5	1	0.891129032258065	1	wtNA	NA	NA	Rap1gapos Slc24a5
Rarb	4930448N21Rik	1	0.995967741935484	1	NAhd	NA	NA	Rarb 4930448N21Rik
Rbfox1	Grm7	0.883064516129032	0.995967741935484	2	wtNA	NA	wt	Rbfox1 Grm7
Rbfox1	Ntng1	1	0.967741935483871	1	NAhd	NA	NA	Rbfox1 Ntng1
Rbfox1	Ryr2	0.959677419354839	1	2	wtNA	NA	NA	Rbfox1 Ryr2
Reln	Gpr149	1	1	1	wthd	NA	NA	Reln Gpr149
Reln	Pbx3	0.979838709677419	0.872311827956989	3	NAhd	NA	NA	Reln Pbx3
Reln	Plxna4	0.979838709677419	1	3	NAhd	NA	NA	Reln Plxna4
Rfx3	Glis3	1	1	1	wtNA	wt	NA	Rfx3 Glis3
Rgs20	A330015K06Rik	0.935483870967742	0.513440860215054	3	NAhd	NA	NA	Rgs20 A330015K06Rik
Rgs20	Matk	0.991935483870968	0.983870967741935	3	NAhd	NA	NA	Rgs20 Matk
Rgs20	Rtn4	0.94758064516129	0.873655913978495	3	NAhd	NA	NA	Rgs20 Rtn4
Rgs6	Arhgap10	0.862903225806452	1	3	wtNA	NA	NA	Rgs6 Arhgap10
Rgs6	Dlgap2	0.959677419354839	1	2	NAhd	NA	hd	Rgs6 Dlgap2
Rgs6	Fat3	0.995967741935484	0.895161290322581	3	wtNA	NA	NA	Rgs6 Fat3
Rgs6	Grin2b	1	1	2	NAhd	NA	hd	Rgs6 Grin2b
Rgs6	Rilpl1	0.870967741935484	1	3	wtNA	NA	wt	Rgs6 Rilpl1
Rgs9	9430020K01Rik	0.943548387096774	1	27	wtNA	NA	NA	Rgs9 9430020K01Rik
Rgs9	Acvr1c	0.987903225806452	0.953629032258065	27	wtNA	NA	wt	Rgs9 Acvr1c
Rgs9	Adcy5	0.915322580645161	0.883064516129032	17	NAhd	NA	NA	Rgs9 Adcy5
Rgs9	Ak5	0.94758064516129	1	27	wtNA	NA	NA	Rgs9 Ak5
Rgs9	Atp2b1	0.991935483870968	1	27	wthd	NA	NA	Rgs9 Atp2b1
Rgs9	Btbd9	0.883064516129032	1	27	wtNA	NA	wt	Rgs9 Btbd9
Rgs9	C530008M17Rik	0.943548387096774	0.995295698924731	17	NAhd	NA	NA	Rgs9 C530008M17Rik
Rgs9	Cask	0.923387096774194	1	17	NAhd	NA	NA	Rgs9 Cask
Rgs9	Cdh8	0.979838709677419	1	27	wtNA	NA	NA	Rgs9 Cdh8
Rgs9	Ckb	0.862903225806452	1	27	wtNA	NA	NA	Rgs9 Ckb
Rgs9	Cntn3	0.850806451612903	1	17	NAhd	NA	NA	Rgs9 Cntn3
Rgs9	Cpne5	0.850806451612903	0.824596774193548	17	NAhd	NA	NA	Rgs9 Cpne5
Rgs9	Epb41l4b	1	1	27	wtNA	NA	wt	Rgs9 Epb41l4b
Rgs9	Epha5	0.866935483870968	0.965725806451613	27	wtNA	NA	NA	Rgs9 Epha5
Rgs9	Fmnl2	0.895161290322581	1	17	NAhd	NA	NA	Rgs9 Fmnl2
Rgs9	Fndc9	0.915322580645161	1	17	NAhd	NA	NA	Rgs9 Fndc9
Rgs9	Gm15155	0.971774193548387	0.995295698924731	27	wtNA	NA	NA	Rgs9 Gm15155
Rgs9	Gm16083	0.983870967741935	1	17	NAhd	NA	NA	Rgs9 Gm16083
Rgs9	Gm26836	0.850806451612903	1	17	NAhd	NA	hd	Rgs9 Gm26836
Rgs9	Gm37459	0.911290322580645	1	17	NAhd	NA	NA	Rgs9 Gm37459
Rgs9	Gnas	0.935483870967742	0.995295698924731	27	wtNA	NA	NA	Rgs9 Gnas
Rgs9	Gsg1l	0.963709677419355	1	27	wtNA	NA	NA	Rgs9 Gsg1l
Rgs9	Hcn1	0.963709677419355	1	27	wtNA	NA	wt	Rgs9 Hcn1
Rgs9	Hpca	0.979838709677419	0.997983870967742	27	wtNA	NA	NA	Rgs9 Hpca
Rgs9	Inf2	0.943548387096774	1	27	wtNA	NA	NA	Rgs9 Inf2
Rgs9	Kcnh4	1	1	27	wtNA	NA	wt	Rgs9 Kcnh4
Rgs9	Kcnip4	0.987903225806452	1	27	wtNA	NA	wt	Rgs9 Kcnip4
Rgs9	Kdm3a	0.903225806451613	0.99260752688172	17	NAhd	NA	hd	Rgs9 Kdm3a
Rgs9	Myh10	0.875	1	17	NAhd	NA	NA	Rgs9 Myh10
Rgs9	Nagk	0.850806451612903	0.995967741935484	27	wtNA	NA	NA	Rgs9 Nagk
Rgs9	Pde10a	1	0.784274193548387	27	wthd	NA	NA	Rgs9 Pde10a
Rgs9	Pde4d	0.919354838709677	1	27	wtNA	NA	NA	Rgs9 Pde4d
Rgs9	Pdzd2	0.911290322580645	1	17	NAhd	NA	NA	Rgs9 Pdzd2
Rgs9	Prkd1	0.92741935483871	1	27	wtNA	NA	NA	Rgs9 Prkd1
Rgs9	Robo1	0.870967741935484	1	17	NAhd	NA	NA	Rgs9 Robo1
Rgs9	Sergef	0.94758064516129	1	27	wtNA	NA	wt	Rgs9 Sergef
Rgs9	Slc4a4	0.983870967741935	0.696908602150538	27	wtNA	NA	NA	Rgs9 Slc4a4
Rgs9	Spata16	0.959677419354839	1	27	wtNA	NA	wt	Rgs9 Spata16
Rgs9	Strn	0.955645161290323	1	27	wtNA	NA	NA	Rgs9 Strn
Rgs9	Syp	0.866935483870968	1	27	wtNA	NA	NA	Rgs9 Syp
Rgs9	Wscd2	0.963709677419355	0.997983870967742	17	NAhd	NA	hd	Rgs9 Wscd2
Rgs9	Zswim6	0.983870967741935	0.995967741935484	27	wtNA	NA	NA	Rgs9 Zswim6
Robo1	Fam126a	0.939516129032258	1	1	wtNA	NA	NA	Robo1 Fam126a
Rora	Cdh13	0.903225806451613	1	3	NAhd	NA	NA	Rora Cdh13
Rora	Gpr158	1	1	6	wtNA	NA	NA	Rora Gpr158
Rora	Kcnk2	0.919354838709677	1	6	wtNA	NA	NA	Rora Kcnk2
Rora	Kcnq3	0.983870967741935	1	6	wtNA	NA	NA	Rora Kcnq3
Rora	Ptprd	1	0.983870967741935	6	wthd	NA	NA	Rora Ptprd
Rora	Rims1	1	1	3	NAhd	NA	NA	Rora Rims1
Rora	Spock3	0.891129032258065	0.832661290322581	6	wtNA	NA	NA	Rora Spock3
Rora	Thsd7a	0.987903225806452	0.995967741935484	6	wtNA	NA	NA	Rora Thsd7a
Rorb	Adam33	0.971774193548387	1	20	wtNA	NA	wt	Rorb Adam33
Rorb	Cadps2	1	1	20	wthd	NA	NA	Rorb Cadps2
Rorb	Cdh6	0.959677419354839	1	20	wthd	NA	NA	Rorb Cdh6
Rorb	Cnih3	1	1	20	wtNA	NA	NA	Rorb Cnih3
Rorb	Col26a1	0.931451612903226	1	26	NAhd	NA	NA	Rorb Col26a1
Rorb	Cplx2	0.943548387096774	1	20	wthd	NA	NA	Rorb Cplx2
Rorb	Dab1	0.891129032258065	0.987903225806452	20	wtNA	NA	NA	Rorb Dab1
Rorb	Dgkg	0.983870967741935	1	26	NAhd	NA	hd	Rorb Dgkg
Rorb	Dscaml1	1	1	26	NAhd	NA	NA	Rorb Dscaml1
Rorb	Gabrg3	1	0.959677419354839	26	NAhd	NA	NA	Rorb Gabrg3
Rorb	Gm13629	1	1	26	NAhd	NA	NA	Rorb Gm13629
Rorb	Gm20752	1	1	20	wthd	NA	NA	Rorb Gm20752
Rorb	Gm42953	0.883064516129032	1	26	NAhd	NA	hd	Rorb Gm42953
Rorb	Grm1	0.987903225806452	1	26	NAhd	NA	hd	Rorb Grm1
Rorb	Iqgap2	0.939516129032258	1	26	NAhd	NA	NA	Rorb Iqgap2
Rorb	Kcnh5	1	1	20	wthd	NA	NA	Rorb Kcnh5
Rorb	Kcnq3	0.987903225806452	1	26	NAhd	NA	NA	Rorb Kcnq3
Rorb	Kcnt2	0.935483870967742	1	20	wtNA	NA	NA	Rorb Kcnt2
Rorb	Lhfp	0.92741935483871	1	20	wthd	NA	NA	Rorb Lhfp
Rorb	Ly6e	0.907258064516129	1	20	wtNA	NA	wt	Rorb Ly6e
Rorb	Mb21d2	0.967741935483871	1	20	wtNA	NA	wt	Rorb Mb21d2
Rorb	Mid1	1	1	26	NAhd	NA	NA	Rorb Mid1
Rorb	Myo16	1	1	20	wthd	NA	NA	Rorb Myo16
Rorb	Nrg1	0.967741935483871	0.978494623655914	26	NAhd	NA	NA	Rorb Nrg1
Rorb	Ntrk3	0.991935483870968	0.995967741935484	20	wthd	NA	NA	Rorb Ntrk3
Rorb	Pamr1	0.967741935483871	1	20	wthd	NA	NA	Rorb Pamr1
Rorb	Prkce	0.943548387096774	1	20	wtNA	NA	NA	Rorb Prkce
Rorb	Prr16	1	1	20	wthd	NA	NA	Rorb Prr16
Rorb	Rcan2	1	1	20	wthd	NA	NA	Rorb Rcan2
Rorb	Slit3	0.850806451612903	0.658602150537634	26	NAhd	NA	NA	Rorb Slit3
Rorb	Thsd7a	0.879032258064516	0.973118279569892	26	NAhd	NA	NA	Rorb Thsd7a
Rorb	Whrn	0.987903225806452	1	20	wthd	NA	NA	Rorb Whrn
Rorb	Wwc1	0.935483870967742	1	20	wtNA	NA	wt	Rorb Wwc1
Rorb	Zmat4	0.987903225806452	0.995967741935484	26	NAhd	NA	NA	Rorb Zmat4
RP23-231J2.1	Grin2a	0.967741935483871	1	1	NAhd	hd	NA	RP23-231J2.1 Grin2a
RP23-407N2.2	Rarb	1	0.923387096774194	1	NAhd	hd	NA	RP23-407N2.2 Rarb
RP24-127M20.8	Gm26804	0.979838709677419	0.955645161290323	2	NAhd	NA	NA	RP24-127M20.8 Gm26804
RP24-127M20.8	Sltm	0.923387096774194	0.954301075268817	2	NAhd	NA	hd	RP24-127M20.8 Sltm
Satb2	Adarb2	0.951612903225806	1	5	wtNA	NA	NA	Satb2 Adarb2
Satb2	Bcl11b	0.983870967741935	0.823924731182796	4	NAhd	NA	NA	Satb2 Bcl11b
Satb2	Cntnap5c	0.951612903225806	0.987903225806452	5	wtNA	NA	NA	Satb2 Cntnap5c
Satb2	Erbb4	0.979838709677419	0.995967741935484	5	wthd	NA	NA	Satb2 Erbb4
Satb2	Lmo3	0.991935483870968	1	4	NAhd	NA	NA	Satb2 Lmo3
Satb2	Nkain3	0.955645161290323	0.720430107526882	5	wtNA	NA	NA	Satb2 Nkain3
Satb2	Npas2	0.963709677419355	1	5	wtNA	NA	wt	Satb2 Npas2
Satb2	Pcsk2	0.987903225806452	1	4	NAhd	NA	NA	Satb2 Pcsk2
Sdk1	Sulf1	0.983870967741935	0.873655913978495	1	NAhd	NA	NA	Sdk1 Sulf1
Sgcz	Col25a1	0.887096774193548	1	1	NAhd	NA	hd	Sgcz Col25a1
Sgcz	Strip2	0.903225806451613	1	1	wtNA	NA	NA	Sgcz Strip2
Sh3rf2	Prkcb	0.866935483870968	0.532258064516129	1	wtNA	NA	wt	Sh3rf2 Prkcb
Shisa9	St6galnac5	1	1	1	wtNA	NA	NA	Shisa9 St6galnac5
Slc24a2	Rmst	0.911290322580645	1	1	wtNA	wt	wt	Slc24a2 Rmst
Slc24a5	Gm2163	1	0.979838709677419	1	NAhd	NA	NA	Slc24a5 Gm2163
Slc4a4	Chn1	0.979838709677419	0.995967741935484	1	wtNA	NA	wt	Slc4a4 Chn1
Slc8a1	Mapk4	0.875	1	1	NAhd	NA	NA	Slc8a1 Mapk4
Slit3	Cacna1c	0.866935483870968	0.994623655913978	2	NAhd	NA	hd	Slit3 Cacna1c
Slit3	Lrrtm4	0.995967741935484	0.993951612903226	2	NAhd	NA	NA	Slit3 Lrrtm4
Snhg11	6530403H02Rik	0.951612903225806	0.970430107526882	29	wtNA	NA	NA	Snhg11 6530403H02Rik
Snhg11	Astn2	0.967741935483871	0.850806451612903	29	wthd	NA	NA	Snhg11 Astn2
Snhg11	Atad2b	0.862903225806452	1	29	wtNA	NA	wt	Snhg11 Atad2b
Snhg11	Baz2b	0.895161290322581	1	29	wtNA	NA	NA	Snhg11 Baz2b
Snhg11	BC005561	1	1	29	wthd	NA	NA	Snhg11 BC005561
Snhg11	Camta1	1	0.997983870967742	29	wthd	NA	NA	Snhg11 Camta1
Snhg11	Chst1	0.919354838709677	1	29	wtNA	NA	wt	Snhg11 Chst1
Snhg11	Cntnap2	0.991935483870968	0.747311827956989	13	NAhd	NA	NA	Snhg11 Cntnap2
Snhg11	Coro6	0.983870967741935	1	29	wthd	NA	NA	Snhg11 Coro6
Snhg11	Cpeb3	0.979838709677419	1	29	wtNA	NA	NA	Snhg11 Cpeb3
Snhg11	Fbxl20	0.92741935483871	1	29	wtNA	NA	wt	Snhg11 Fbxl20
Snhg11	Fgfr2	0.943548387096774	0.918682795698925	29	wtNA	NA	NA	Snhg11 Fgfr2
Snhg11	Gm13629	0.995967741935484	1	29	wtNA	NA	NA	Snhg11 Gm13629
Snhg11	Gm26733	0.987903225806452	1	29	wtNA	NA	NA	Snhg11 Gm26733
Snhg11	Gm26804	0.959677419354839	0.953629032258065	29	wtNA	NA	NA	Snhg11 Gm26804
Snhg11	Gpatch8	1	1	13	NAhd	NA	hd	Snhg11 Gpatch8
Snhg11	Klhl3	0.858870967741935	1	13	NAhd	NA	NA	Snhg11 Klhl3
Snhg11	Lars	0.887096774193548	1	29	wtNA	NA	wt	Snhg11 Lars
Snhg11	Luzp1	1	1	29	wthd	NA	NA	Snhg11 Luzp1
Snhg11	Lynx1	0.975806451612903	1	29	wthd	NA	NA	Snhg11 Lynx1
Snhg11	Magi2	1	1	13	NAhd	NA	hd	Snhg11 Magi2
Snhg11	Meg3	1	0.945564516129032	29	wthd	NA	NA	Snhg11 Meg3
Snhg11	Msi2	1	1	29	wtNA	NA	wt	Snhg11 Msi2
Snhg11	Plekha1	0.899193548387097	1	29	wtNA	NA	NA	Snhg11 Plekha1
Snhg11	Psma3	0.907258064516129	1	29	wtNA	NA	wt	Snhg11 Psma3
Snhg11	Rmdn1	1	1	29	wtNA	NA	wt	Snhg11 Rmdn1
Snhg11	Snrnp48	0.895161290322581	1	29	wtNA	NA	NA	Snhg11 Snrnp48
Snhg11	Spata7	0.895161290322581	1	29	wtNA	NA	NA	Snhg11 Spata7
Snhg11	Stk32c	0.987903225806452	1	29	wtNA	NA	wt	Snhg11 Stk32c
Snhg11	Tnrc6b	0.983870967741935	0.995967741935484	29	wtNA	NA	wt	Snhg11 Tnrc6b
Snhg11	Tyro3	0.995967741935484	1	29	wtNA	NA	wt	Snhg11 Tyro3
Snhg11	Ube3a	1	0.889112903225806	29	wthd	NA	NA	Snhg11 Ube3a
Snhg11	Ubn2	0.866935483870968	1	13	NAhd	NA	NA	Snhg11 Ubn2
Snhg11	Zdhhc14	0.850806451612903	0.986559139784946	29	wtNA	NA	NA	Snhg11 Zdhhc14
Snrnp70	Sept11	0.963709677419355	1	222	wtNA	NA	wt	Snrnp70 Sept11
Snrnp70	0610043K17Rik	1	1	222	wtNA	NA	wt	Snrnp70 0610043K17Rik
Snrnp70	1110051M20Rik	0.959677419354839	1	222	wtNA	NA	wt	Snrnp70 1110051M20Rik
Snrnp70	2610037D02Rik	1	1	222	wtNA	NA	wt	Snrnp70 2610037D02Rik
Snrnp70	5330417C22Rik	0.931451612903226	1	51	NAhd	NA	hd	Snrnp70 5330417C22Rik
Snrnp70	5330434G04Rik	0.899193548387097	1	222	wtNA	NA	NA	Snrnp70 5330434G04Rik
Snrnp70	9630028H03Rik	1	1	222	wtNA	NA	wt	Snrnp70 9630028H03Rik
Snrnp70	A330102I10Rik	0.959677419354839	1	222	wtNA	NA	wt	Snrnp70 A330102I10Rik
Snrnp70	A930015D03Rik	0.955645161290323	1	222	wthd	NA	NA	Snrnp70 A930015D03Rik
Snrnp70	Acap2	0.963709677419355	1	222	wtNA	NA	NA	Snrnp70 Acap2
Snrnp70	Acyp2	0.995967741935484	1	222	wtNA	NA	NA	Snrnp70 Acyp2
Snrnp70	Adam22	0.959677419354839	1	222	wtNA	NA	wt	Snrnp70 Adam22
Snrnp70	Adcy9	0.915322580645161	1	222	wthd	NA	NA	Snrnp70 Adcy9
Snrnp70	Add2	0.995967741935484	1	222	wtNA	NA	wt	Snrnp70 Add2
Snrnp70	Adgrb1	0.939516129032258	1	222	wtNA	NA	wt	Snrnp70 Adgrb1
Snrnp70	Adgrl2	1	1	222	wtNA	NA	NA	Snrnp70 Adgrl2
Snrnp70	Agk	0.866935483870968	1	222	wthd	NA	NA	Snrnp70 Agk
Snrnp70	Aig1	0.951612903225806	1	222	wtNA	NA	wt	Snrnp70 Aig1
Snrnp70	Amph	0.899193548387097	1	222	wtNA	NA	NA	Snrnp70 Amph
Snrnp70	Ankrd12	0.991935483870968	0.997983870967742	222	wtNA	NA	wt	Snrnp70 Ankrd12
Snrnp70	Ap4s1	0.92741935483871	1	51	NAhd	NA	hd	Snrnp70 Ap4s1
Snrnp70	Arhgap20	0.92741935483871	1	222	wtNA	NA	wt	Snrnp70 Arhgap20
Snrnp70	Arhgef11	0.895161290322581	1	222	wtNA	NA	wt	Snrnp70 Arhgef11
Snrnp70	Arhgef17	0.967741935483871	1	51	NAhd	NA	hd	Snrnp70 Arhgef17
Snrnp70	Arnt2	0.870967741935484	1	222	wtNA	NA	wt	Snrnp70 Arnt2
Snrnp70	Arpp19	0.919354838709677	1	222	wtNA	NA	wt	Snrnp70 Arpp19
Snrnp70	Atad2b	0.983870967741935	1	222	wtNA	NA	wt	Snrnp70 Atad2b
Snrnp70	Atf2	0.991935483870968	1	222	wthd	NA	NA	Snrnp70 Atf2
Snrnp70	Atp1a3	0.899193548387097	1	222	wtNA	NA	wt	Snrnp70 Atp1a3
Snrnp70	Bach2	0.963709677419355	1	222	wtNA	NA	wt	Snrnp70 Bach2
Snrnp70	Baz2b	0.903225806451613	1	222	wthd	NA	NA	Snrnp70 Baz2b
Snrnp70	Bcas3	1	1	222	wtNA	NA	wt	Snrnp70 Bcas3
Snrnp70	Btaf1	0.995967741935484	1	222	wthd	NA	NA	Snrnp70 Btaf1
Snrnp70	Btbd1	0.995967741935484	1	222	wtNA	NA	wt	Snrnp70 Btbd1
Snrnp70	Cacna1b	0.923387096774194	1	222	wtNA	NA	NA	Snrnp70 Cacna1b
Snrnp70	Cacna1i	0.939516129032258	1	222	wtNA	NA	wt	Snrnp70 Cacna1i
Snrnp70	Cacng3	0.935483870967742	1	51	NAhd	NA	hd	Snrnp70 Cacng3
Snrnp70	Camkk2	0.987903225806452	1	222	wtNA	NA	wt	Snrnp70 Camkk2
Snrnp70	Cask	0.887096774193548	1	222	wtNA	NA	NA	Snrnp70 Cask
Snrnp70	Ccdc58	0.995967741935484	1	222	wtNA	NA	wt	Snrnp70 Ccdc58
Snrnp70	Ccdc85a	0.991935483870968	1	222	wtNA	NA	wt	Snrnp70 Ccdc85a
Snrnp70	Ccdc88a	0.850806451612903	1	222	wtNA	NA	wt	Snrnp70 Ccdc88a
Snrnp70	Ccm2	0.858870967741935	1	51	NAhd	NA	NA	Snrnp70 Ccm2
Snrnp70	Ccnl2	1	1	222	wtNA	NA	wt	Snrnp70 Ccnl2
Snrnp70	Cdc42	0.995967741935484	1	222	wtNA	NA	wt	Snrnp70 Cdc42
Snrnp70	Celf3	0.943548387096774	1	222	wtNA	NA	wt	Snrnp70 Celf3
Snrnp70	Cep164	0.995967741935484	1	222	wtNA	NA	wt	Snrnp70 Cep164
Snrnp70	Clcn2	0.967741935483871	1	222	wtNA	NA	wt	Snrnp70 Clcn2
Snrnp70	Cog5	0.955645161290323	1	222	wtNA	NA	wt	Snrnp70 Cog5
Snrnp70	Cpe	0.866935483870968	1	222	wtNA	NA	NA	Snrnp70 Cpe
Snrnp70	Cpeb3	0.850806451612903	1	51	NAhd	NA	NA	Snrnp70 Cpeb3
Snrnp70	Crebbp	1	1	222	wtNA	NA	wt	Snrnp70 Crebbp
Snrnp70	Cspp1	1	1	222	wthd	NA	NA	Snrnp70 Cspp1
Snrnp70	Cstf3	1	1	222	wtNA	NA	NA	Snrnp70 Cstf3
Snrnp70	Ctdspl	1	1	222	wtNA	NA	wt	Snrnp70 Ctdspl
Snrnp70	Cul5	0.995967741935484	1	222	wtNA	NA	wt	Snrnp70 Cul5
Snrnp70	Cyfip2	1	1	222	wtNA	NA	wt	Snrnp70 Cyfip2
Snrnp70	Dbn1	0.991935483870968	1	222	wthd	NA	NA	Snrnp70 Dbn1
Snrnp70	Dclk2	0.875	1	222	wtNA	NA	NA	Snrnp70 Dclk2
Snrnp70	Dennd1b	0.995967741935484	1	222	wthd	NA	NA	Snrnp70 Dennd1b
Snrnp70	Desi2	1	1	222	wtNA	NA	wt	Snrnp70 Desi2
Snrnp70	Dmtn	0.862903225806452	1	222	wtNA	NA	wt	Snrnp70 Dmtn
Snrnp70	Dnajc1	0.870967741935484	1	51	NAhd	NA	NA	Snrnp70 Dnajc1
Snrnp70	Dnajc19	0.866935483870968	1	51	NAhd	NA	hd	Snrnp70 Dnajc19
Snrnp70	Dnm1l	0.979838709677419	1	222	wthd	NA	NA	Snrnp70 Dnm1l
Snrnp70	Dtnbos	0.919354838709677	1	222	wtNA	NA	NA	Snrnp70 Dtnbos
Snrnp70	E130308A19Rik	0.903225806451613	1	222	wtNA	NA	NA	Snrnp70 E130308A19Rik
Snrnp70	Echdc1	0.92741935483871	1	222	wtNA	NA	NA	Snrnp70 Echdc1
Snrnp70	Efr3b	0.959677419354839	1	222	wtNA	NA	NA	Snrnp70 Efr3b
Snrnp70	Egln1	0.943548387096774	1	222	wtNA	NA	wt	Snrnp70 Egln1
Snrnp70	Eml1	0.939516129032258	1	51	NAhd	NA	NA	Snrnp70 Eml1
Snrnp70	Ep300	0.987903225806452	1	222	wtNA	NA	wt	Snrnp70 Ep300
Snrnp70	Epha7	0.995967741935484	1	222	wtNA	NA	wt	Snrnp70 Epha7
Snrnp70	Exoc6b	0.879032258064516	1	222	wtNA	NA	wt	Snrnp70 Exoc6b
Snrnp70	Fam131a	0.907258064516129	1	222	wtNA	NA	NA	Snrnp70 Fam131a
Snrnp70	Fam172a	0.995967741935484	1	222	wtNA	NA	wt	Snrnp70 Fam172a
Snrnp70	Fam188a	0.991935483870968	1	222	wtNA	NA	wt	Snrnp70 Fam188a
Snrnp70	Fam193a	0.995967741935484	1	222	wtNA	NA	wt	Snrnp70 Fam193a
Snrnp70	Fam49a	0.959677419354839	1	222	wtNA	NA	NA	Snrnp70 Fam49a
Snrnp70	Fmn2	0.915322580645161	1	222	wtNA	NA	wt	Snrnp70 Fmn2
Snrnp70	Foxn3	0.919354838709677	0.991935483870968	222	wtNA	NA	NA	Snrnp70 Foxn3
Snrnp70	Fus	0.955645161290323	1	222	wtNA	NA	NA	Snrnp70 Fus
Snrnp70	Gab2	1	1	222	wtNA	NA	NA	Snrnp70 Gab2
Snrnp70	Gbf1	0.955645161290323	1	222	wtNA	NA	wt	Snrnp70 Gbf1
Snrnp70	Gigyf2	1	1	222	wthd	NA	NA	Snrnp70 Gigyf2
Snrnp70	Glg1	0.975806451612903	1	222	wtNA	NA	NA	Snrnp70 Glg1
Snrnp70	Glp2r	1	1	222	wtNA	NA	wt	Snrnp70 Glp2r
Snrnp70	Gm10419	0.923387096774194	1	222	wtNA	NA	wt	Snrnp70 Gm10419
Snrnp70	Gm11149	0.955645161290323	1	222	wtNA	NA	NA	Snrnp70 Gm11149
Snrnp70	Gm15414	1	1	222	wtNA	NA	wt	Snrnp70 Gm15414
Snrnp70	Gm15738	0.883064516129032	1	51	NAhd	NA	hd	Snrnp70 Gm15738
Snrnp70	Gm15810	0.995967741935484	1	222	wtNA	NA	NA	Snrnp70 Gm15810
Snrnp70	Gm15952	1	1	222	wtNA	NA	wt	Snrnp70 Gm15952
Snrnp70	Gm21092	0.959677419354839	1	222	wtNA	NA	wt	Snrnp70 Gm21092
Snrnp70	Gm21954	0.983870967741935	1	222	wtNA	NA	wt	Snrnp70 Gm21954
Snrnp70	Gm26542	0.94758064516129	1	222	wtNA	NA	wt	Snrnp70 Gm26542
Snrnp70	Gm26733	0.92741935483871	1	222	wtNA	NA	NA	Snrnp70 Gm26733
Snrnp70	Gm42418	0.975806451612903	1	222	wtNA	NA	NA	Snrnp70 Gm42418
Snrnp70	Gm42439	0.907258064516129	1	222	wtNA	NA	NA	Snrnp70 Gm42439
Snrnp70	Gm42477	1	1	222	wthd	NA	NA	Snrnp70 Gm42477
Snrnp70	Gmds	0.983870967741935	1	222	wtNA	NA	wt	Snrnp70 Gmds
Snrnp70	Gnb1	0.959677419354839	1	222	wthd	NA	NA	Snrnp70 Gnb1
Snrnp70	Gtdc1	0.92741935483871	1	222	wtNA	NA	NA	Snrnp70 Gtdc1
Snrnp70	Hdac8	0.995967741935484	1	222	wtNA	NA	wt	Snrnp70 Hdac8
Snrnp70	Homer2	0.907258064516129	1	222	wtNA	NA	NA	Snrnp70 Homer2
Snrnp70	Hook2	0.983870967741935	1	222	wtNA	NA	wt	Snrnp70 Hook2
Snrnp70	Immp1l	0.979838709677419	1	222	wtNA	NA	NA	Snrnp70 Immp1l
Snrnp70	Iqsec2	0.967741935483871	1	222	wthd	NA	NA	Snrnp70 Iqsec2
Snrnp70	Ispd	0.94758064516129	1	222	wthd	NA	NA	Snrnp70 Ispd
Snrnp70	Jakmip1	0.854838709677419	1	222	wtNA	NA	NA	Snrnp70 Jakmip1
Snrnp70	Jazf1	0.983870967741935	1	222	wtNA	NA	wt	Snrnp70 Jazf1
Snrnp70	Kcnq2	0.850806451612903	1	222	wthd	NA	NA	Snrnp70 Kcnq2
Snrnp70	Klc1	0.983870967741935	0.993951612903226	222	wtNA	NA	wt	Snrnp70 Klc1
Snrnp70	Klf12	0.891129032258065	1	222	wtNA	NA	wt	Snrnp70 Klf12
Snrnp70	Klhdc10	0.951612903225806	1	222	wtNA	NA	NA	Snrnp70 Klhdc10
Snrnp70	Klhl2	0.854838709677419	1	51	NAhd	NA	NA	Snrnp70 Klhl2
Snrnp70	Lrch3	1	1	222	wtNA	NA	wt	Snrnp70 Lrch3
Snrnp70	Lrig2	0.983870967741935	1	222	wtNA	NA	wt	Snrnp70 Lrig2
Snrnp70	Lrrc19	0.971774193548387	0.997983870967742	222	wtNA	NA	wt	Snrnp70 Lrrc19
Snrnp70	Lyst	1	1	222	wtNA	NA	wt	Snrnp70 Lyst
Snrnp70	Lzts1	0.923387096774194	1	222	wtNA	NA	wt	Snrnp70 Lzts1
Snrnp70	Mark3	1	1	222	wtNA	NA	wt	Snrnp70 Mark3
Snrnp70	Mcu	0.94758064516129	1	222	wtNA	NA	wt	Snrnp70 Mcu
Snrnp70	Mdm4	0.967741935483871	1	222	wtNA	NA	wt	Snrnp70 Mdm4
Snrnp70	Mid1	0.866935483870968	0.995967741935484	222	wtNA	NA	NA	Snrnp70 Mid1
Snrnp70	Mpp6	0.951612903225806	1	222	wtNA	NA	NA	Snrnp70 Mpp6
Snrnp70	Msra	0.987903225806452	1	222	wtNA	NA	NA	Snrnp70 Msra
Snrnp70	Mycbp	0.931451612903226	1	222	wtNA	NA	NA	Snrnp70 Mycbp
Snrnp70	Myh10	0.995967741935484	1	222	wtNA	NA	NA	Snrnp70 Myh10
Snrnp70	Nagk	0.915322580645161	1	51	NAhd	NA	NA	Snrnp70 Nagk
Snrnp70	Ncor1	1	1	222	wtNA	NA	wt	Snrnp70 Ncor1
Snrnp70	Ndfip1	0.955645161290323	1	222	wtNA	NA	NA	Snrnp70 Ndfip1
Snrnp70	Nf1	0.995967741935484	0.997983870967742	222	wtNA	NA	wt	Snrnp70 Nf1
Snrnp70	Nfat5	1	1	222	wtNA	NA	wt	Snrnp70 Nfat5
Snrnp70	Nin	0.995967741935484	1	222	wtNA	NA	NA	Snrnp70 Nin
Snrnp70	Nipbl	1	1	222	wtNA	NA	wt	Snrnp70 Nipbl
Snrnp70	Nos1ap	0.866935483870968	0.983870967741935	51	NAhd	NA	NA	Snrnp70 Nos1ap
Snrnp70	Npepps	1	0.997983870967742	222	wtNA	NA	wt	Snrnp70 Npepps
Snrnp70	Nr6a1	0.975806451612903	1	222	wtNA	NA	wt	Snrnp70 Nr6a1
Snrnp70	Nrf1	0.987903225806452	1	222	wtNA	NA	wt	Snrnp70 Nrf1
Snrnp70	Ogt	0.915322580645161	1	222	wtNA	NA	NA	Snrnp70 Ogt
Snrnp70	Osbpl9	0.995967741935484	1	222	wtNA	NA	wt	Snrnp70 Osbpl9
Snrnp70	P2ry14	0.891129032258065	1	222	wtNA	NA	NA	Snrnp70 P2ry14
Snrnp70	Pan3	0.987903225806452	1	51	NAhd	NA	hd	Snrnp70 Pan3
Snrnp70	Parp8	1	1	222	wtNA	NA	NA	Snrnp70 Parp8
Snrnp70	Paxbp1	1	1	222	wthd	NA	NA	Snrnp70 Paxbp1
Snrnp70	Pcdh10	0.995967741935484	1	222	wtNA	NA	NA	Snrnp70 Pcdh10
Snrnp70	Pcdh17	0.92741935483871	1	222	wtNA	NA	NA	Snrnp70 Pcdh17
Snrnp70	Pcsk2os2	0.935483870967742	1	222	wtNA	NA	NA	Snrnp70 Pcsk2os2
Snrnp70	Pde3b	0.987903225806452	1	222	wthd	NA	NA	Snrnp70 Pde3b
Snrnp70	Pdss2	0.975806451612903	1	222	wtNA	NA	wt	Snrnp70 Pdss2
Snrnp70	Peak1	0.870967741935484	1	51	NAhd	NA	hd	Snrnp70 Peak1
Snrnp70	Phf20l1	0.995967741935484	1	222	wtNA	NA	NA	Snrnp70 Phf20l1
Snrnp70	Pibf1	1	1	222	wtNA	NA	wt	Snrnp70 Pibf1
Snrnp70	Pkig	0.935483870967742	1	222	wthd	NA	NA	Snrnp70 Pkig
Snrnp70	Pkn2	0.971774193548387	1	222	wtNA	NA	NA	Snrnp70 Pkn2
Snrnp70	Plekha6	0.971774193548387	1	222	wtNA	NA	wt	Snrnp70 Plekha6
Snrnp70	Plppr4	1	1	222	wtNA	NA	wt	Snrnp70 Plppr4
Snrnp70	Plxdc2	0.92741935483871	1	222	wtNA	NA	wt	Snrnp70 Plxdc2
Snrnp70	Pnisr	0.995967741935484	1	222	wtNA	NA	wt	Snrnp70 Pnisr
Snrnp70	Pnn	0.939516129032258	1	222	wtNA	NA	NA	Snrnp70 Pnn
Snrnp70	Polb	1	1	222	wtNA	NA	wt	Snrnp70 Polb
Snrnp70	Pou2f2	0.995967741935484	1	222	wtNA	NA	wt	Snrnp70 Pou2f2
Snrnp70	Ppp1r14c	0.911290322580645	1	222	wtNA	NA	NA	Snrnp70 Ppp1r14c
Snrnp70	Ppp2r2a	0.866935483870968	1	51	NAhd	NA	hd	Snrnp70 Ppp2r2a
Snrnp70	Ppp2r3a	0.903225806451613	0.991935483870968	222	wtNA	NA	NA	Snrnp70 Ppp2r3a
Snrnp70	Prdm10	0.983870967741935	1	222	wtNA	NA	wt	Snrnp70 Prdm10
Snrnp70	Prkdc	0.983870967741935	1	222	wtNA	NA	wt	Snrnp70 Prkdc
Snrnp70	Prrc2c	0.991935483870968	1	222	wtNA	NA	wt	Snrnp70 Prrc2c
Snrnp70	Psme4	0.895161290322581	1	222	wthd	NA	NA	Snrnp70 Psme4
Snrnp70	Ptbp2	0.919354838709677	1	222	wtNA	NA	wt	Snrnp70 Ptbp2
Snrnp70	Ptprr	0.879032258064516	0.997983870967742	222	wtNA	NA	wt	Snrnp70 Ptprr
Snrnp70	Pura	0.983870967741935	1	222	wtNA	NA	wt	Snrnp70 Pura
Snrnp70	Pvt1	1	1	222	wtNA	NA	wt	Snrnp70 Pvt1
Snrnp70	Ranbp17	0.983870967741935	1	222	wtNA	NA	wt	Snrnp70 Ranbp17
Snrnp70	Rbm26	0.983870967741935	1	222	wtNA	NA	wt	Snrnp70 Rbm26
Snrnp70	Rbm5	1	1	222	wthd	NA	NA	Snrnp70 Rbm5
Snrnp70	Rev3l	1	0.995967741935484	222	wtNA	NA	NA	Snrnp70 Rev3l
Snrnp70	Rgs11	0.903225806451613	1	222	wtNA	NA	wt	Snrnp70 Rgs11
Snrnp70	Rnf165	0.959677419354839	1	222	wtNA	NA	wt	Snrnp70 Rnf165
Snrnp70	Rock1	0.979838709677419	1	222	wthd	NA	NA	Snrnp70 Rock1
Snrnp70	Rock2	0.903225806451613	1	51	NAhd	NA	hd	Snrnp70 Rock2
Snrnp70	RP23-407N2.2	0.979838709677419	1	51	NAhd	NA	hd	Snrnp70 RP23-407N2.2
Snrnp70	Rsrc1	0.971774193548387	1	222	wtNA	NA	wt	Snrnp70 Rsrc1
Snrnp70	Rtn4	0.987903225806452	1	222	wtNA	NA	NA	Snrnp70 Rtn4
Snrnp70	Rufy3	1	1	222	wthd	NA	NA	Snrnp70 Rufy3
Snrnp70	Sbf2	0.995967741935484	1	222	wtNA	NA	wt	Snrnp70 Sbf2
Snrnp70	Scaper	0.991935483870968	1	222	wtNA	NA	NA	Snrnp70 Scaper
Snrnp70	Scg5	0.995967741935484	1	222	wtNA	NA	NA	Snrnp70 Scg5
Snrnp70	Sec14l1	0.907258064516129	1	222	wtNA	NA	NA	Snrnp70 Sec14l1
Snrnp70	Senp7	0.991935483870968	1	222	wtNA	NA	NA	Snrnp70 Senp7
Snrnp70	Sergef	0.995967741935484	1	222	wtNA	NA	wt	Snrnp70 Sergef
Snrnp70	Sh3kbp1	0.907258064516129	1	222	wtNA	NA	NA	Snrnp70 Sh3kbp1
Snrnp70	Shank3	0.959677419354839	1	222	wtNA	NA	wt	Snrnp70 Shank3
Snrnp70	Shtn1	0.850806451612903	1	222	wtNA	NA	NA	Snrnp70 Shtn1
Snrnp70	Slc12a5	1	1	222	wtNA	NA	wt	Snrnp70 Slc12a5
Snrnp70	Slc24a5	0.995967741935484	1	222	wtNA	NA	NA	Snrnp70 Slc24a5
Snrnp70	Slc2a3	0.915322580645161	1	222	wtNA	NA	wt	Snrnp70 Slc2a3
Snrnp70	Slc38a9	0.995967741935484	1	222	wtNA	NA	wt	Snrnp70 Slc38a9
Snrnp70	Slco3a1	0.951612903225806	1	222	wtNA	NA	wt	Snrnp70 Slco3a1
Snrnp70	Snca	0.995967741935484	1	222	wtNA	NA	wt	Snrnp70 Snca
Snrnp70	Snrnp48	0.94758064516129	1	51	NAhd	NA	NA	Snrnp70 Snrnp48
Snrnp70	Snx29	0.94758064516129	1	222	wtNA	NA	wt	Snrnp70 Snx29
Snrnp70	Specc1	0.963709677419355	1	222	wtNA	NA	wt	Snrnp70 Specc1
Snrnp70	Spred1	0.991935483870968	1	222	wtNA	NA	wt	Snrnp70 Spred1
Snrnp70	Sptbn4	0.92741935483871	1	222	wtNA	NA	wt	Snrnp70 Sptbn4
Snrnp70	Srcin1	0.967741935483871	1	222	wtNA	NA	NA	Snrnp70 Srcin1
Snrnp70	Srgap2	0.983870967741935	1	222	wthd	NA	NA	Snrnp70 Srgap2
Snrnp70	Srsf11	0.991935483870968	1	222	wtNA	NA	wt	Snrnp70 Srsf11
Snrnp70	Ssbp4	0.899193548387097	1	222	wtNA	NA	NA	Snrnp70 Ssbp4
Snrnp70	St13	0.862903225806452	1	51	NAhd	NA	hd	Snrnp70 St13
Snrnp70	St7	0.971774193548387	1	222	wthd	NA	NA	Snrnp70 St7
Snrnp70	Strn3	0.979838709677419	1	222	wtNA	NA	wt	Snrnp70 Strn3
Snrnp70	Stx16	0.955645161290323	1	222	wtNA	NA	wt	Snrnp70 Stx16
Snrnp70	Stxbp4	0.951612903225806	1	222	wtNA	NA	wt	Snrnp70 Stxbp4
Snrnp70	Suv420h1	0.971774193548387	1	51	NAhd	NA	hd	Snrnp70 Suv420h1
Snrnp70	Svop	0.915322580645161	1	51	NAhd	NA	hd	Snrnp70 Svop
Snrnp70	Tcf20	1	1	222	wtNA	NA	wt	Snrnp70 Tcf20
Snrnp70	Thrap3	0.979838709677419	1	222	wtNA	NA	wt	Snrnp70 Thrap3
Snrnp70	Tmem117	0.987903225806452	1	222	wtNA	NA	NA	Snrnp70 Tmem117
Snrnp70	Tmsb4x	0.94758064516129	1	222	wtNA	NA	wt	Snrnp70 Tmsb4x
Snrnp70	Tra2a	0.995967741935484	1	222	wthd	NA	NA	Snrnp70 Tra2a
Snrnp70	Traf3ip2	1	1	222	wtNA	NA	wt	Snrnp70 Traf3ip2
Snrnp70	Trim9	0.879032258064516	1	222	wtNA	NA	NA	Snrnp70 Trim9
Snrnp70	Trip4	0.995967741935484	1	222	wtNA	NA	wt	Snrnp70 Trip4
Snrnp70	Tsc22d1	1	1	222	wtNA	NA	NA	Snrnp70 Tsc22d1
Snrnp70	Ttll11	0.959677419354839	1	222	wtNA	NA	wt	Snrnp70 Ttll11
Snrnp70	Ttll7	0.979838709677419	1	222	wtNA	NA	wt	Snrnp70 Ttll7
Snrnp70	Ttyh1	0.850806451612903	1	51	NAhd	NA	hd	Snrnp70 Ttyh1
Snrnp70	Ubn2	0.987903225806452	1	222	wtNA	NA	NA	Snrnp70 Ubn2
Snrnp70	Unc13a	0.919354838709677	1	222	wtNA	NA	NA	Snrnp70 Unc13a
Snrnp70	Usp50	1	1	222	wtNA	NA	wt	Snrnp70 Usp50
Snrnp70	Uty	1	1	222	wtNA	NA	wt	Snrnp70 Uty
Snrnp70	Vezt	0.903225806451613	1	222	wtNA	NA	wt	Snrnp70 Vezt
Snrnp70	Vwa8	0.951612903225806	1	222	wtNA	NA	wt	Snrnp70 Vwa8
Snrnp70	Wapl	0.991935483870968	1	222	wtNA	NA	wt	Snrnp70 Wapl
Snrnp70	Wasf1	1	1	222	wtNA	NA	wt	Snrnp70 Wasf1
Snrnp70	Whsc1l1	0.995967741935484	1	222	wtNA	NA	NA	Snrnp70 Whsc1l1
Snrnp70	Wnk1	0.959677419354839	1	222	wtNA	NA	NA	Snrnp70 Wnk1
Snrnp70	Ywhae	0.866935483870968	0.995967741935484	222	wtNA	NA	wt	Snrnp70 Ywhae
Snrnp70	Zfp207	0.899193548387097	1	222	wtNA	NA	NA	Snrnp70 Zfp207
Snrnp70	Zfp292	1	1	222	wtNA	NA	wt	Snrnp70 Zfp292
Snrnp70	Zfp608	0.907258064516129	1	222	wtNA	NA	wt	Snrnp70 Zfp608
Snrnp70	Zfp950	0.991935483870968	1	222	wtNA	NA	wt	Snrnp70 Zfp950
Snrnp70	Zfyve28	0.943548387096774	1	51	NAhd	NA	hd	Snrnp70 Zfyve28
Snrnp70	Zmym4	0.875	1	51	NAhd	NA	hd	Snrnp70 Zmym4
Snrnp70	Zwint	0.943548387096774	1	222	wtNA	NA	NA	Snrnp70 Zwint
Sntb2	4930448N21Rik	0.919354838709677	0.762096774193548	1	NAhd	hd	NA	Sntb2 4930448N21Rik
Sorbs2os	Sorbs2	1	0.991935483870968	1	wthd	NA	NA	Sorbs2os Sorbs2
Sox5	Gpr158	0.995967741935484	0.951612903225806	3	wthd	NA	NA	Sox5 Gpr158
Sox5	Grm8	0.935483870967742	0.735887096774194	3	wthd	NA	NA	Sox5 Grm8
Sox5	Kctd16	0.991935483870968	1	6	NAhd	NA	NA	Sox5 Kctd16
Sox5	Pcsk5	0.975806451612903	1	6	NAhd	NA	NA	Sox5 Pcsk5
Sox5	Rxfp1	0.915322580645161	1	6	NAhd	NA	NA	Sox5 Rxfp1
Sox5	Sox5os4	1	1	3	wthd	NA	NA	Sox5 Sox5os4
Spock3	Dach1	0.903225806451613	0.803091397849462	12	wtNA	NA	NA	Spock3 Dach1
Spock3	Frmd4b	1	0.967741935483871	12	wtNA	NA	NA	Spock3 Frmd4b
Spock3	Galntl6	1	0.995967741935484	12	wtNA	NA	NA	Spock3 Galntl6
Spock3	Kcnd3	1	1	12	wtNA	NA	NA	Spock3 Kcnd3
Spock3	Nrg1	0.850806451612903	1	12	wtNA	NA	NA	Spock3 Nrg1
Spock3	Pard3	0.911290322580645	1	12	wtNA	NA	NA	Spock3 Pard3
Spock3	Plxna4	0.995967741935484	1	12	wtNA	NA	NA	Spock3 Plxna4
Spock3	Ppp1r16b	0.907258064516129	1	12	wtNA	NA	wt	Spock3 Ppp1r16b
Spock3	Ppp1r2	0.943548387096774	1	12	wtNA	NA	NA	Spock3 Ppp1r2
Spock3	Ptpn5	1	1	12	wtNA	NA	NA	Spock3 Ptpn5
Spock3	Slc9a9	0.979838709677419	1	12	wtNA	NA	NA	Spock3 Slc9a9
Spock3	Vsnl1	0.94758064516129	1	12	wtNA	NA	NA	Spock3 Vsnl1
St6galnac5	Pigk	1	1	1	wthd	NA	NA	St6galnac5 Pigk
Strn	Irf2	0.919354838709677	1	1	wtNA	NA	wt	Strn Irf2
Sulf1	Sdk1	0.967741935483871	0.966397849462366	1	wtNA	NA	NA	Sulf1 Sdk1
Suv420h1	Vps54	0.911290322580645	0.540322580645161	1	NAhd	hd	hd	Suv420h1 Vps54
Tcf4	Rapgef4	0.875	1	1	wtNA	NA	NA	Tcf4 Rapgef4
Tenm2	Cdh4	1	0.963709677419355	2	NAhd	NA	NA	Tenm2 Cdh4
Tenm2	Egfem1	0.995967741935484	0.65994623655914	2	NAhd	NA	NA	Tenm2 Egfem1
Tenm3	4930555F03Rik	1	1	1	wtNA	wt	NA	Tenm3 4930555F03Rik
Tenm4	Gm15414	1	1	1	wtNA	NA	wt	Tenm4 Gm15414
Thsd7a	Cntn5	1	0.995967741935484	3	wthd	NA	NA	Thsd7a Cntn5
Thsd7a	Nlgn1	0.854838709677419	1	3	wtNA	NA	NA	Thsd7a Nlgn1
Thsd7a	Stac2	0.879032258064516	1	3	wtNA	NA	wt	Thsd7a Stac2
Thsd7b	Magi1	0.862903225806452	1	3	wtNA	wt	NA	Thsd7b Magi1
Thsd7b	Nlgn1	0.862903225806452	0.93010752688172	3	wtNA	wt	NA	Thsd7b Nlgn1
Thsd7b	Sulf1	0.92741935483871	1	3	wtNA	wt	NA	Thsd7b Sulf1
Tmcc3	Gap43	0.887096774193548	1	3	NAhd	NA	hd	Tmcc3 Gap43
Tmcc3	Pnn	0.862903225806452	0.994623655913979	3	NAhd	NA	NA	Tmcc3 Pnn
Tmcc3	Zwint	0.891129032258065	1	3	NAhd	NA	NA	Tmcc3 Zwint
Tmem163	Ctnna2	0.923387096774194	1	4	wtNA	NA	wt	Tmem163 Ctnna2
Tmem163	Luzp2	0.887096774193548	0.966397849462366	1	NAhd	NA	hd	Tmem163 Luzp2
Tmem163	Nhs	0.943548387096774	1	4	wtNA	NA	wt	Tmem163 Nhs
Tmem163	Nr4a2	0.858870967741935	0.987903225806452	4	wtNA	NA	NA	Tmem163 Nr4a2
Tmem163	Ryr2	0.879032258064516	0.991935483870968	4	wtNA	NA	NA	Tmem163 Ryr2
Tox	D5Ertd615e	0.935483870967742	0.991935483870968	3	wthd	NA	NA	Tox D5Ertd615e
Tox	Gm26883	0.975806451612903	0.995967741935484	3	wtNA	NA	NA	Tox Gm26883
Tox	Ldb2	1	0.983870967741935	3	wtNA	NA	NA	Tox Ldb2
Trhde	4930473D10Rik	1	0.995967741935484	1	wthd	NA	NA	Trhde 4930473D10Rik
Tshz2	Gm28905	0.963709677419355	1	5	wthd	NA	NA	Tshz2 Gm28905
Tshz2	Lypd1	0.891129032258065	1	5	wtNA	NA	wt	Tshz2 Lypd1
Tshz2	Nxph1	1	1	5	wtNA	NA	wt	Tshz2 Nxph1
Tshz2	Samd4	0.983870967741935	1	5	wtNA	NA	wt	Tshz2 Samd4
Tshz2	Tox	0.971774193548387	1	4	NAhd	NA	NA	Tshz2 Tox
Tshz2	Vwc2l	0.991935483870968	1	5	wtNA	NA	NA	Tshz2 Vwc2l
Tshz2	Zbtb16	0.915322580645161	0.997311827956989	4	NAhd	NA	NA	Tshz2 Zbtb16
Tshz2	Zfpm2	0.883064516129032	1	4	NAhd	NA	NA	Tshz2 Zfpm2
Unc5d	March1	0.935483870967742	1	4	NAhd	NA	NA	Unc5d March1
Unc5d	Brinp3	0.975806451612903	1	4	wthd	NA	NA	Unc5d Brinp3
Unc5d	Fam19a2	0.995967741935484	1	4	wtNA	NA	NA	Unc5d Fam19a2
Unc5d	Foxp2	0.955645161290323	0.922043010752688	4	wtNA	NA	NA	Unc5d Foxp2
Unc5d	Ndst3	0.991935483870968	1	4	NAhd	NA	NA	Unc5d Ndst3
Unc5d	Rorb	0.975806451612903	1	4	wtNA	NA	NA	Unc5d Rorb
Unc5d	Tmem178b	0.951612903225806	1	4	NAhd	NA	NA	Unc5d Tmem178b
Usp48	Bcr	0.955645161290323	0.556451612903226	1	wtNA	wt	NA	Usp48 Bcr
Xkr4	Gm1992	1	1	1	wthd	NA	NA	Xkr4 Gm1992
Xylt1	Pcsk5	0.875	1	1	wtNA	NA	NA	Xylt1 Pcsk5
Zbtb20	Gab2	0.943548387096774	1	14	wtNA	NA	NA	Zbtb20 Gab2
Zbtb20	Grik2	0.923387096774194	1	14	wtNA	NA	NA	Zbtb20 Grik2
Zbtb20	Hap1	0.911290322580645	1	14	wtNA	NA	wt	Zbtb20 Hap1
Zbtb20	Lyzl4	0.935483870967742	1	14	wtNA	NA	wt	Zbtb20 Lyzl4
Zbtb20	Macrod2	0.995967741935484	1	14	wtNA	NA	wt	Zbtb20 Macrod2
Zbtb20	Mcu	0.983870967741935	1	14	wtNA	NA	wt	Zbtb20 Mcu
Zbtb20	Pcdh17	1	1	14	wtNA	NA	NA	Zbtb20 Pcdh17
Zbtb20	Pde4b	0.951612903225806	1	14	wthd	NA	NA	Zbtb20 Pde4b
Zbtb20	Prrc2c	0.987903225806452	1	14	wtNA	NA	wt	Zbtb20 Prrc2c
Zbtb20	Rbm39	0.955645161290323	1	14	wthd	NA	NA	Zbtb20 Rbm39
Zbtb20	Rgs17	0.92741935483871	1	14	wtNA	NA	wt	Zbtb20 Rgs17
Zbtb20	Satb2	1	1	14	wtNA	NA	NA	Zbtb20 Satb2
Zbtb20	Sv2b	0.975806451612903	1	14	wtNA	NA	NA	Zbtb20 Sv2b
Zbtb20	Tenm3	0.975806451612903	1	14	wtNA	NA	wt	Zbtb20 Tenm3
Zcchc16	Trpc5	1	0.995967741935484	1	wthd	NA	NA	Zcchc16 Trpc5
Zfhx3	4930448N21Rik	0.94758064516129	0.60752688172043	1	wtNA	NA	NA	Zfhx3 4930448N21Rik
Zfp385b	Gm13944	1	1	1	wthd	NA	NA	Zfp385b Gm13944
Zfp536	Ndst4	0.870967741935484	0.830645161290323	1	wthd	NA	NA	Zfp536 Ndst4
Zfpm2	Cpa6	0.987903225806452	1	4	NAhd	NA	hd	Zfpm2 Cpa6
Zfpm2	Frmd5	0.951612903225806	1	4	NAhd	NA	NA	Zfpm2 Frmd5
Zfpm2	Mical3	0.862903225806452	1	4	NAhd	NA	hd	Zfpm2 Mical3
Zfpm2	Trabd2b	0.895161290322581	1	4	NAhd	NA	hd	Zfpm2 Trabd2b
Zmat4	Ppm1l	0.854838709677419	1	2	wtNA	NA	NA	Zmat4 Ppm1l
Zmat4	Rorb	1	0.995967741935484	2	wtNA	NA	NA	Zmat4 Rorb
