# Supplementary material for: Huntington disease oligodendrocyte maturation deficits revealed by single-nucleus RNAseq are rescued by thiamine-biotin supplementation
Source: Nat Commun. 2022 Dec 21;13:7791. doi: 10.1038/s41467-022-35388-x (PMC9772349; doi:10.1038/s41467-022-35388-x)
Supplement: Supplementary file 7 — Supplementary Dataset 5 [file 41467_2022_35388_MOESM7_ESM.xlsx]

## Sheet: 8wctx neun neg
output_prefix	name	motif_id	cluster	total_tfbs	WT.COR.8W.Neg_footprints_mean_score	WT.COR.8W.Neg_footprints_bound	HD.COR.8W.Neg_footprints_mean_score	HD.COR.8W.Neg_footprints_bound	WT.COR.8W.Neg_footprints_HD.COR.8W.Neg_footprints_change	WT.COR.8W.Neg_footprints_HD.COR.8W.Neg_footprints_pvalue
Runx1_MA0002.2	Runx1	MA0002.2	C_Bcl11B	146497	0.08467	59809	0.08436	57252	0.0087	3.60858e-58
TFAP2A_MA0003.4	TFAP2A	MA0003.4	C_TFAP2C	140246	0.13406	73851	0.13249	70616	0.04435	2.23447e-122
Arnt_MA0004.1	Arnt	MA0004.1	C_MYC	45263	0.12297	20733	0.12393	20077	0.00813	9.88245e-35
AhrArnt_MA0006.1	Ahr::Arnt	MA0006.1	C_Ahr::Arnt	61000	0.11395	27858	0.11458	27022	-0.00751	3.75889e-31
Ar_MA0007.3	Ar	MA0007.3	C_Ar	49035	0.09159	21037	0.09483	20672	-0.04709	6.27487e-104
TBXT_MA0009.2	TBXT	MA0009.2	C_TBXT	39454	0.06525	13178	0.06487	12156	0.01802	7.16011e-56
PAX5_MA0014.3	PAX5	MA0014.3	C_PAX5	39294	0.18838	21727	0.1865	21032	0.03569	1.75293e-86
NR2F1_MA0017.2	NR2F1	MA0017.2	C_NR2F1	91608	0.08526	39007	0.08345	36213	0.04701	3.46778e-115
CREB1_MA0018.4	CREB1	MA0018.4	C_FOSL1::JUN	78091	0.088	29188	0.08712	28001	-0.00228	1.22194e-09
Ddit3Cebpa_MA0019.1	Ddit3::Cebpa	MA0019.1	C_Ddit3::Cebpa	42402	0.07556	15072	0.07548	14323	-0.01048	1.54564e-41
E2F1_MA0024.3	E2F1	MA0024.3	C_ZNF417	9513	0.20559	5858	0.20375	5717	0.03529	3.03606e-49
NFIL3_MA0025.2	NFIL3	MA0025.2	C_NFIL3	56018	0.05631	13390	0.05731	12708	-0.04403	1.06196e-103
EN1_MA0027.2	EN1	MA0027.2	C_ESX1	31891	0.0794	10074	0.08203	10332	-0.07345	3.28464e-114
ELK1_MA0028.2	ELK1	MA0028.2	C_ETS1	28121	0.26171	16125	0.25919	15581	0.051	5.69279e-101
Mecom_MA0029.1	Mecom	MA0029.1	C_Mecom	69292	0.05599	17787	0.05661	17015	-0.02978	5.48092e-94
FOXF2_MA0030.1	FOXF2	MA0030.1	C_FOXF2	63424	0.0614	17681	0.0617	16703	-0.02011	1.45863e-75
FOXD1_MA0031.1	FOXD1	MA0031.1	C_FOXN3	65021	0.07013	21228	0.07056	20558	-0.02711	2.18982e-90
FOXC1_MA0032.2	FOXC1	MA0032.2	C_FOXC2	106773	0.04782	21035	0.04803	19433	-0.02096	1.45968e-85
FOXL1_MA0033.2	FOXL1	MA0033.2	C_FOXN3	48756	0.07205	16063	0.07232	15600	-0.02358	3.47309e-75
GATA1_MA0035.4	GATA1	MA0035.4	C_GATA1	44376	0.05767	12322	0.05811	11635	-0.02482	2.00336e-67
GATA2_MA0036.3	GATA2	MA0036.3	C_Gata3	51691	0.05879	15086	0.0591	14040	-0.0143	4.44028e-54
Gata3_MA0037.4	Gata3	MA0037.4	C_Gata3	59164	0.05636	16338	0.05662	15363	-0.02092	1.50266e-78
GFI1_MA0038.2	GFI1	MA0038.2	C_Gfi1B	76361	0.07609	24357	0.07688	23564	-0.03387	3.81687e-99
KLF4_MA0039.4	KLF4	MA0039.4	C_KLF4	287688	0.15936	149365	0.15813	143437	0.04024	2.35868e-139
Foxq1_MA0040.1	Foxq1	MA0040.1	C_Foxq1	74161	0.05457	17803	0.05484	16882	-0.02222	2.26671e-84
FOXD3_MA0041.2	FOXD3	MA0041.2	C_FOXD3	160701	0.04991	32765	0.0501	30645	-0.0129	1.10466e-74
FOXI1_MA0042.2	FOXI1	MA0042.2	C_FOXN3	80421	0.07259	27166	0.07274	26123	-0.01965	2.3966e-73
HLF_MA0043.3	HLF	MA0043.3	C_NFIL3	49820	0.06007	13044	0.061	12531	-0.04003	9.33673e-91
HNF1A_MA0046.2	HNF1A	MA0046.2	C_HNF1A	49946	0.04554	8909	0.04632	8427	-0.0334	2.52394e-86
FOXA2_MA0047.3	FOXA2	MA0047.3	C_FOXN3	80339	0.06153	22581	0.06175	21541	-0.02462	2.81236e-88
NHLH1_MA0048.2	NHLH1	MA0048.2	C_Tcf12	109209	0.10714	52415	0.10929	51691	-0.03075	9.12906e-112
Irf1_MA0050.3	Irf1	MA0050.3	C_Irf1	169670	0.05858	44641	0.05919	42939	-0.03382	6.75012e-113
IRF2_MA0051.1	IRF2	MA0051.1	C_IRF2	76985	0.06545	22183	0.06652	21488	-0.03664	4.76539e-102
MEF2A_MA0052.4	MEF2A	MA0052.4	C_MEF2A	142308	0.04716	26599	0.04817	25679	-0.04993	1.17988e-126
MZF1_MA0056.2	MZF1	MA0056.2	C_MZF1	83707	0.08361	33478	0.08358	31746	0.00936	1.27627e-45
MAX_MA0058.3	MAX	MA0058.3	C_MYC	33449	0.12616	15811	0.12726	15317	0.0089	5.44205e-30
MAXMYC_MA0059.1	MAX::MYC	MA0059.1	C_MAX::MYC	54218	0.09885	22209	0.09873	20997	0.03032	5.31879e-89
NFYA_MA0060.3	NFYA	MA0060.3	C_NFYA	51998	0.19076	21757	0.19095	20810	-0.00542	3.09337e-25
GABPA_MA0062.3	GABPA	MA0062.3	C_Erg	184318	0.09949	79823	0.09788	75657	0.03417	2.73388e-122
NKX2-5_MA0063.2	NKX2-5	MA0063.2	C_NKX2-5	64592	0.06828	21344	0.06855	20324	-0.01395	9.57279e-59
PpargRxra_MA0065.2	Pparg::Rxra	MA0065.2	C_Pparg::Rxra	176243	0.09822	78803	0.09729	74687	0.02867	8.68993e-109
PPARG_MA0066.1	PPARG	MA0066.1	C_PPARG	73938	0.0852	31278	0.08436	29326	0.03195	1.09714e-96
PAX2_MA0067.2	PAX2	MA0067.2	C_PAX9	23510	0.16235	12370	0.16168	12017	0.00355	3.44533e-09
PAX4_MA0068.2	PAX4	MA0068.2	C_PAX4	20172	0.06389	5389	0.06552	5436	-0.07524	1.37865e-102
PAX6_MA0069.1	PAX6	MA0069.1	C_PAX6	35541	0.07155	11641	0.07227	11197	-0.03385	1.2859e-81
PBX1_MA0070.1	PBX1	MA0070.1	C_PBX1	44944	0.06498	11834	0.06537	11165	-0.02189	1.13112e-66
RORA_MA0071.1	RORA	MA0071.1	C_RORA	74157	0.07106	27278	0.07051	25623	0.01687	3.41421e-72
RORA_MA0072.1	RORA	MA0072.1	C_RORA	58594	0.06846	19625	0.06851	18597	-0.01239	1.19876e-52
RREB1_MA0073.1	RREB1	MA0073.1	C_RREB1	252245	0.08747	93368	0.08699	88372	0.01649	3.9273e-91
RXRAVDR_MA0074.1	RXRA::VDR	MA0074.1	C_RXRA::VDR	46050	0.08139	17931	0.08116	16964	0.01079	1.40793e-47
PRRX2_MA0075.3	PRRX2	MA0075.3	C_PAX4	39571	0.05952	9995	0.06209	10343	-0.09544	9.03697e-125
ELK4_MA0076.2	ELK4	MA0076.2	C_ETS1	78111	0.17531	41118	0.17281	39376	0.04966	3.06948e-113
SOX9_MA0077.1	SOX9	MA0077.1	C_Sox17	52436	0.08463	18508	0.08337	17761	-0.01006	1.83597e-46
Sox17_MA0078.2	Sox17	MA0078.2	C_Sox17	90122	0.08809	33096	0.08749	31949	-0.01608	6.60872e-71
SP1_MA0079.5	SP1	MA0079.5	C_PATZ1	239011	0.20938	137583	0.20786	134103	0.03177	1.11865e-118
Spi1_MA0080.6	Spi1	MA0080.6	C_Spi1	257013	0.08677	99672	0.08586	94911	0.01461	9.96649e-87
SPIB_MA0081.2	SPIB	MA0081.2	C_Spi1	217610	0.08971	86703	0.08857	82513	0.018	4.12527e-93
SRF_MA0083.3	SRF	MA0083.3	C_SRF	27750	0.0708	8868	0.07067	8302	-0.00438	1.57506e-08
SRY_MA0084.1	SRY	MA0084.1	C_SRY	62069	0.05954	15378	0.06001	14838	-0.0386	1.05989e-95
Sox5_MA0087.2	Sox5	MA0087.2	C_Sox17	79683	0.09032	30303	0.08929	29165	-0.00904	8.27579e-43
ZNF143_MA0088.2	ZNF143	MA0088.2	C_ZNF76	83822	0.09842	32992	0.0974	31356	0.01052	1.66779e-50
MAFGNFE2L1_MA0089.2	MAFG::NFE2L1	MA0089.2	C_MAFG::NFE2L1	101591	0.07216	36242	0.07263	35455	-0.0304	4.85127e-99
TEAD1_MA0090.3	TEAD1	MA0090.3	C_TEAD4	93511	0.07298	34061	0.07299	32095	0.00422	1.77428e-23
TAL1TCF3_MA0091.1	TAL1::TCF3	MA0091.1	C_TAL1::TCF3	93925	0.07097	32814	0.07177	31354	-0.00549	1.402e-34
Hand1Tcf3_MA0092.1	Hand1::Tcf3	MA0092.1	C_Hand1::Tcf3	89793	0.07853	34569	0.07847	33026	0.00686	5.71978e-37
USF1_MA0093.3	USF1	MA0093.3	C_BHLHE41	75610	0.09507	30851	0.09457	29359	0.01414	2.58709e-59
Yy1_MA0095.3	Yy1	MA0095.3	C_Yy1	94351	0.08352	30224	0.08386	28819	-0.01806	1.0557e-78
ETS1_MA0098.3	ETS1	MA0098.3	C_ETS1	47612	0.17136	23144	0.16958	22029	0.03827	4.74366e-97
FOSJUN_MA0099.3	FOS::JUN	MA0099.3	C_FOSL1::JUN	70206	0.07094	23273	0.07251	23983	-0.07665	6.04454e-129
MYB_MA0100.3	MYB	MA0100.3	C_MYB	73042	0.07735	27492	0.07738	26096	-0.00391	4.18522e-16
REL_MA0101.1	REL	MA0101.1	C_REL	65125	0.09876	27225	0.09822	25903	0.01909	2.48067e-73
CEBPA_MA0102.4	CEBPA	MA0102.4	C_CEBPB	50479	0.06064	13939	0.06145	13497	-0.04553	4.43516e-102
ZEB1_MA0103.3	ZEB1	MA0103.3	C_ASCL1	137428	0.07864	55488	0.07827	51670	0.03022	7.92693e-104
MYCN_MA0104.4	MYCN	MA0104.4	C_MYCN	36840	0.13557	18671	0.13491	17776	0.04085	3.23743e-87
NFKB1_MA0105.4	NFKB1	MA0105.4	C_NFKB2	36279	0.10795	17213	0.1069	16456	0.03088	6.63217e-77
TP53_MA0106.3	TP53	MA0106.3	C_TP53	47790	0.08051	17738	0.07955	16697	0.00844	2.79115e-32
RELA_MA0107.1	RELA	MA0107.1	C_RELA	72051	0.09055	29360	0.0902	27988	0.01337	4.4194e-54
TBP_MA0108.2	TBP	MA0108.2	C_TBP	42163	0.06797	12145	0.06844	11386	-0.01081	1.38624e-37
Spz1_MA0111.1	Spz1	MA0111.1	C_Spz1	76896	0.08679	31176	0.08644	29637	0.01639	1.46928e-67
ESR1_MA0112.3	ESR1	MA0112.3	C_ESR2	57467	0.09186	25235	0.09065	23691	0.03562	2.25304e-92
NR3C1_MA0113.3	NR3C1	MA0113.3	C_Ar	43657	0.08475	17768	0.08809	17432	-0.05478	4.92359e-101
HNF4A_MA0114.4	HNF4A	MA0114.4	C_HNF4G	91355	0.07822	34349	0.0781	32468	0.0071	1.96724e-38
NR1H2RXRA_MA0115.1	NR1H2::RXRA	MA0115.1	C_NR1H2::RXRA	76236	0.07453	27938	0.07362	25881	0.02253	2.08768e-80
Znf423_MA0116.1	Znf423	MA0116.1	C_Znf423	77627	0.10849	36524	0.10699	34542	0.04223	1.03091e-109
Mafb_MA0117.2	Mafb	MA0117.2	C_MAFF	74264	0.07303	26684	0.07322	25654	-0.02377	3.52545e-84
NFICTLX1_MA0119.1	NFIC::TLX1	MA0119.1	C_NFIB	91680	0.11098	44970	0.11263	43614	-0.00635	2.65989e-35
Nkx3-2_MA0122.3	Nkx3-2	MA0122.3	C_ISL2	58770	0.05751	16302	0.05818	15515	-0.03135	7.39612e-86
Nkx3-1_MA0124.2	Nkx3-1	MA0124.2	C_ISL2	55839	0.06805	18630	0.06849	17772	-0.01312	6.18094e-56
Nobox_MA0125.1	Nobox	MA0125.1	C_Dlx2	34461	0.07014	9629	0.07225	9706	-0.07161	1.19922e-111
ZNF354C_MA0130.1	ZNF354C	MA0130.1	C_ZNF354C	215514	0.09918	95312	0.0986	91004	0.01724	1.68885e-97
HINFP_MA0131.2	HINFP	MA0131.2	C_HINFP	34399	0.26451	24185	0.26416	23912	0.02551	1.69422e-73
PDX1_MA0132.2	PDX1	MA0132.2	C_ESX1	32623	0.06372	9044	0.06687	9418	-0.08897	9.49775e-122
Lhx3_MA0135.1	Lhx3	MA0135.1	C_Lhx3	65448	0.04502	10979	0.04647	10747	-0.0591	6.03321e-122
Elf5_MA0136.3	Elf5	MA0136.3	C_Elf5	204794	0.08507	80858	0.08384	76593	0.02072	4.64115e-100
STAT1_MA0137.3	STAT1	MA0137.3	C_Stat4	107020	0.07373	35009	0.07402	33265	-0.00769	4.13671e-43
REST_MA0138.2	REST	MA0138.2	C_REST	129972	0.11036	62848	0.10971	60174	0.03061	9.78281e-110
CTCF_MA0139.1	CTCF	MA0139.1	C_CTCF	162055	0.14912	90586	0.14652	87181	0.05652	2.61985e-132
GATA1TAL1_MA0140.2	GATA1::TAL1	MA0140.2	C_GATA1::TAL1	59440	0.06753	19570	0.06805	18850	-0.02155	5.02599e-73
ESRRB_MA0141.3	ESRRB	MA0141.3	C_NR5A1	76175	0.07042	27704	0.07011	26014	0.00812	6.61596e-43
Pou5f1Sox2_MA0142.1	Pou5f1::Sox2	MA0142.1	C_Pou5f1::Sox2	106008	0.05672	26467	0.05775	25341	-0.0439	3.49187e-114
SOX2_MA0143.4	SOX2	MA0143.4	C_SOX13	74821	0.08136	25980	0.08031	25029	-0.01651	3.26648e-65
STAT3_MA0144.2	STAT3	MA0144.2	C_Stat4	139033	0.07595	47016	0.07623	44696	-0.00969	3.0271e-58
Tfcp2l1_MA0145.2	Tfcp2l1	MA0145.2	C_Tfcp2l1	117307	0.12487	60121	0.12353	57246	0.04022	4.15986e-114
Zfx_MA0146.2	Zfx	MA0146.2	C_Zfx	139241	0.18486	83815	0.18235	80567	0.06582	1.43806e-139
MYC_MA0147.3	MYC	MA0147.3	C_MYC	57482	0.13098	28913	0.13098	27914	0.02578	6.10533e-79
FOXA1_MA0148.4	FOXA1	MA0148.4	C_FOXN3	81809	0.0602	22442	0.06045	21354	-0.02377	3.18831e-83
EWSR1-FLI1_MA0149.1	EWSR1-FLI1	MA0149.1	C_EWSR1-FLI1	284012	0.09281	114768	0.09288	109769	0.00656	2.28213e-58
Nfe2l2_MA0150.2	Nfe2l2	MA0150.2	C_MAFG::NFE2L1	99220	0.08051	38692	0.08077	37867	-0.01794	3.42604e-77
Arid3a_MA0151.1	Arid3a	MA0151.1	C_Arid3a	334755	0.04774	66732	0.04862	63425	-0.04016	3.99319e-133
Nfatc2_MA0152.2	Nfatc2	MA0152.2	C_Nfatc2	119672	0.06339	34217	0.06394	32877	-0.02993	8.37732e-100
HNF1B_MA0153.2	HNF1B	MA0153.2	C_HNF1A	35571	0.04845	7119	0.04937	6768	-0.04396	1.50603e-94
EBF1_MA0154.4	EBF1	MA0154.4	C_EBF1	130422	0.10633	61478	0.10569	58476	0.02681	4.25727e-102
INSM1_MA0155.1	INSM1	MA0155.1	C_INSM1	119334	0.11607	56206	0.11508	53638	0.02981	4.55436e-100
FEV_MA0156.3	FEV	MA0156.3	C_ETS1	32928	0.22914	18063	0.22691	17340	0.05273	2.17093e-98
Foxo3_MA0157.3	Foxo3	MA0157.3	C_FOXN3	69039	0.06786	21129	0.06809	20358	-0.01815	3.44895e-71
HOXA5_MA0158.2	HOXA5	MA0158.2	C_HOXA5	32679	0.06615	10007	0.06877	10237	-0.08621	3.17361e-121
RARARXRA_MA0159.1	RARA::RXRA	MA0159.1	C_RARA::RXRA	86715	0.0949	37994	0.09371	35862	0.03361	2.79063e-103
NR4A2_MA0160.2	NR4A2	MA0160.2	C_NR4A1	83795	0.06709	26829	0.06727	25437	-0.0133	1.22834e-59
NFIC_MA0161.2	NFIC	MA0161.2	C_NFIX	106134	0.09516	46877	0.09644	45300	-0.00826	2.49035e-52
EGR1_MA0162.4	EGR1	MA0162.4	C_EGR1	200671	0.18738	109368	0.18693	106783	0.01813	3.45893e-92
PLAG1_MA0163.1	PLAG1	MA0163.1	C_PLAG1	164068	0.13398	84152	0.13315	80640	0.03756	9.29612e-123
Nr2e3_MA0164.1	Nr2e3	MA0164.1	C_Nr2e3	42625	0.07579	15300	0.07603	14609	-0.01299	2.01345e-44
ESR2_MA0258.2	ESR2	MA0258.2	C_ESR2	126642	0.09361	57354	0.09232	53873	0.04625	1.45039e-124
ARNTHIF1A_MA0259.1	ARNT::HIF1A	MA0259.1	C_ARNT::HIF1A	27743	0.12237	13410	0.12334	13092	0.00202	5.046e-05
SOX10_MA0442.2	SOX10	MA0442.2	C_SOX4	139391	0.08436	50370	0.08488	48849	-0.02187	3.5604e-96
Atoh1_MA0461.2	Atoh1	MA0461.2	C_ATOH7	50253	0.06034	15248	0.06074	14320	-0.01509	3.51512e-59
BATFJUN_MA0462.2	BATF::JUN	MA0462.2	C_FOSL1::JUN	83377	0.06894	27917	0.07026	28470	-0.06609	1.05037e-138
BCL6_MA0463.2	BCL6	MA0463.2	C_BCL6	74593	0.07342	25657	0.07348	24377	-0.00158	6.9953e-07
BHLHE40_MA0464.2	BHLHE40	MA0464.2	C_MYC	26106	0.14979	12584	0.15148	12357	-0.00607	2.52933e-15
CDX2_MA0465.2	CDX2	MA0465.2	C_CDX2	77609	0.05307	16868	0.05374	15876	-0.03312	1.46583e-96
CEBPB_MA0466.3	CEBPB	MA0466.3	C_CEBPB	6417	0.10851	2453	0.10751	2301	-0.00296	0.0846035
Crx_MA0467.2	Crx	MA0467.2	C_OTX2	54578	0.06395	16927	0.0632	15463	0.04051	6.35445e-98
DUX4_MA0468.1	DUX4	MA0468.1	C_DUX4	53096	0.05705	12712	0.05795	12087	-0.04055	3.6626e-96
E2F3_MA0469.3	E2F3	MA0469.3	C_E2F3	7517	0.09234	2692	0.09374	2612	-0.03111	7.50639e-45
E2F4_MA0470.2	E2F4	MA0470.2	C_ZNF417	9656	0.19544	5594	0.19328	5446	0.03069	5.38648e-48
E2F6_MA0471.2	E2F6	MA0471.2	C_E2F6	188683	0.17059	101183	0.17	98765	0.01714	1.01085e-95
EGR2_MA0472.2	EGR2	MA0472.2	C_EGR1	61147	0.19852	33498	0.19814	32775	0.00908	1.1855e-42
ELF1_MA0473.3	ELF1	MA0473.3	C_Erg	180182	0.10448	79302	0.10286	75246	0.03544	2.16834e-116
Erg_MA0474.3	Erg	MA0474.3	C_Erg	191423	0.10115	83347	0.09953	79047	0.03404	4.58899e-119
FLI1_MA0475.2	FLI1	MA0475.2	C_ETS1	36878	0.19206	18453	0.19003	17692	0.03935	6.43033e-90
FOS_MA0476.1	FOS	MA0476.1	C_FOSL1::JUN	81005	0.06798	26572	0.0695	27251	-0.07428	5.93848e-137
FOSL1_MA0477.2	FOSL1	MA0477.2	C_FOSL1::JUN	74320	0.06915	24834	0.07065	25568	-0.07418	9.64275e-133
FOSL2_MA0478.1	FOSL2	MA0478.1	C_FOSL1::JUN	110181	0.0689	37193	0.06912	36050	-0.01247	1.63888e-57
FOXH1_MA0479.1	FOXH1	MA0479.1	C_FOXH1	71984	0.06672	22655	0.06712	21782	-0.02191	5.05226e-78
Foxo1_MA0480.2	Foxo1	MA0480.2	C_FOXN3	77787	0.07279	26662	0.07291	25843	-0.01838	4.8449e-74
FOXP1_MA0481.3	FOXP1	MA0481.3	C_FOXN3	77226	0.06269	21553	0.06301	20652	-0.02527	5.03963e-84
GATA4_MA0482.2	GATA4	MA0482.2	C_Gata3	63880	0.05966	18651	0.05999	17490	-0.01805	8.33623e-69
Gfi1B_MA0483.1	Gfi1B	MA0483.1	C_Gfi1B	117991	0.07151	39086	0.07201	37553	-0.02162	3.23759e-85
HNF4G_MA0484.2	HNF4G	MA0484.2	C_HNF4G	92683	0.07985	35512	0.0797	33604	0.00797	5.37285e-39
HOXC9_MA0485.2	HOXC9	MA0485.2	C_HOXC10	24504	0.05454	5652	0.05546	5372	-0.04838	2.47287e-93
HSF1_MA0486.2	HSF1	MA0486.2	C_HSF4	59428	0.06929	18773	0.06964	17789	-0.0124	5.90436e-49
JUN_MA0488.1	JUN	MA0488.1	C_FOSL1::JUN	69841	0.09101	25938	0.09014	24777	0.00101	0.0211979
Jun_MA0489.2	Jun	MA0489.2	C_FOSL1::JUN	77279	0.07099	26780	0.07242	27473	-0.06931	4.0433e-130
JUNB_MA0490.2	JUNB	MA0490.2	C_FOSL1::JUN	75710	0.06812	24752	0.06965	25476	-0.07355	1.22058e-130
JUND_MA0491.2	JUND	MA0491.2	C_FOSL1::JUN	71326	0.06802	23170	0.06964	23950	-0.07678	6.59528e-130
JUND_MA0492.1	JUND	MA0492.1	C_FOSL1::JUN	60066	0.09496	22256	0.0941	21224	0.00099	0.00551927
KLF1_MA0493.2	KLF1	MA0493.2	C_KLF4	251713	0.17893	132786	0.17744	127988	0.03727	7.88091e-125
Nr1h3Rxra_MA0494.1	Nr1h3::Rxra	MA0494.1	C_Nr1h3::Rxra	79719	0.08837	34022	0.08711	32098	0.02535	5.38449e-85
MAFF_MA0495.3	MAFF	MA0495.3	C_MAFF	93315	0.06473	29843	0.06508	28672	-0.03031	1.39948e-93
MAFK_MA0496.3	MAFK	MA0496.3	C_MAFK	119888	0.08447	49046	0.08438	47776	-0.00722	7.71695e-41
MEF2C_MA0497.1	MEF2C	MA0497.1	C_MEF2A	142180	0.04946	29030	0.05041	28105	-0.04735	1.32534e-129
MEIS1_MA0498.2	MEIS1	MA0498.2	C_MEIS1	49983	0.07298	16473	0.07362	15970	-0.03009	1.42784e-84
MYOD1_MA0499.2	MYOD1	MA0499.2	C_MYOD1	147869	0.09083	64260	0.0918	61858	-0.0019	2.89348e-10
MYOG_MA0500.2	MYOG	MA0500.2	C_Tcf12	106739	0.10831	52113	0.11081	51531	-0.03646	1.10403e-113
MAFNFE2_MA0501.1	MAF::NFE2	MA0501.1	C_MAFG::NFE2L1	98298	0.07138	34834	0.07178	33920	-0.02625	1.24412e-92
NFYB_MA0502.2	NFYB	MA0502.2	C_NFYB	70768	0.17666	33602	0.17624	31963	0.02964	2.70662e-90
NR2C2_MA0504.1	NR2C2	MA0504.1	C_NR2C2	153918	0.11084	70906	0.10971	67046	0.03646	4.55351e-114
Nr5A2_MA0505.2	Nr5A2	MA0505.2	C_NR5A1	128332	0.07578	50208	0.07459	46068	0.04489	5.61013e-128
Nrf1_MA0506.2	Nrf1	MA0506.2	C_Nrf1	73922	0.27922	49899	0.28034	49403	0.00346	8.16304e-12
POU2F2_MA0507.2	POU2F2	MA0507.2	C_POU1F1	83440	0.05587	18900	0.05728	18414	-0.05933	1.22718e-120
PRDM1_MA0508.3	PRDM1	MA0508.3	C_PRDM1	177561	0.07249	59711	0.07298	57275	-0.01972	9.98609e-86
RFX1_MA0509.3	RFX1	MA0509.3	C_RFX3	41073	0.09546	15674	0.09767	15589	-0.05739	3.2376e-106
RFX5_MA0510.2	RFX5	MA0510.2	C_RFX3	44980	0.0975	17427	0.09967	17157	-0.05338	9.20817e-112
RUNX2_MA0511.2	RUNX2	MA0511.2	C_Bcl11B	37394	0.08446	14025	0.08456	13620	-0.01343	4.49596e-45
Rxra_MA0512.2	Rxra	MA0512.2	C_NR2C2	82428	0.07763	31531	0.0766	29039	0.03017	7.91355e-93
Sox3_MA0514.2	Sox3	MA0514.2	C_SOX13	72869	0.09014	27967	0.08894	27060	-0.00785	8.34498e-40
Sox6_MA0515.1	Sox6	MA0515.1	C_Sox6	129524	0.08602	46946	0.08571	45486	-0.01802	8.0971e-80
SP2_MA0516.3	SP2	MA0516.3	C_PATZ1	201593	0.24428	119608	0.24303	117367	0.02113	1.30196e-95
STAT1STAT2_MA0517.1	STAT1::STAT2	MA0517.1	C_STAT1::STAT2	185159	0.06288	51506	0.06329	49395	-0.01696	7.88414e-94
Stat4_MA0518.1	Stat4	MA0518.1	C_Stat4	124562	0.07515	41948	0.0753	39898	-0.00675	1.02737e-40
Stat5aStat5b_MA0519.1	Stat5a::Stat5b	MA0519.1	C_Stat5b	113284	0.07617	38841	0.0765	37202	-0.00997	1.78329e-57
Stat6_MA0520.1	Stat6	MA0520.1	C_Stat6	96233	0.06487	28756	0.06553	27822	-0.03113	2.46292e-96
Tcf12_MA0521.2	Tcf12	MA0521.2	C_Tcf12	109557	0.10932	53844	0.11173	53097	-0.02949	9.23758e-97
TCF3_MA0522.3	TCF3	MA0522.3	C_ASCL1	117415	0.12974	57205	0.13019	54990	0.016	7.21509e-79
TCF7L2_MA0523.1	TCF7L2	MA0523.1	C_Lef1	108999	0.06627	34519	0.06633	32695	-0.01842	1.1921e-77
TFAP2C_MA0524.2	TFAP2C	MA0524.2	C_TFAP2A	80546	0.15277	45014	0.15102	43353	0.04065	5.07592e-105
TP63_MA0525.2	TP63	MA0525.2	C_TP63	35488	0.07476	11499	0.07428	10753	-0.01434	2.5573e-48
USF2_MA0526.4	USF2	MA0526.4	C_BHLHE41	23460	0.14969	11311	0.15073	10937	0.01769	5.2203e-40
ZBTB33_MA0527.1	ZBTB33	MA0527.1	C_ZBTB33	20433	0.28944	14310	0.28911	14214	0.00373	0.000157966
ZNF263_MA0528.2	ZNF263	MA0528.2	C_SP5	252236	0.14449	128153	0.14419	123899	0.01617	7.35142e-97
Bach1Mafk_MA0591.1	Bach1::Mafk	MA0591.1	C_MAFK	110421	0.09144	47104	0.09144	46025	-0.00837	2.53942e-47
ESRRA_MA0592.3	ESRRA	MA0592.3	C_NR5A1	101700	0.07682	40556	0.07629	37758	0.02471	4.57082e-99
FOXP2_MA0593.1	FOXP2	MA0593.1	C_FOXN3	112143	0.06462	32945	0.06497	31645	-0.02045	2.61602e-85
HOXA9_MA0594.2	HOXA9	MA0594.2	C_HOXA9	5929	0.10115	2181	0.10209	2146	-0.06127	3.40191e-70
SREBF1_MA0595.1	SREBF1	MA0595.1	C_SREBF1	69074	0.09547	29436	0.095	28192	0.00817	1.48754e-39
SREBF2_MA0596.1	SREBF2	MA0596.1	C_SREBF1	73025	0.08403	29606	0.08359	28427	-0.00037	0.566593
THAP1_MA0597.2	THAP1	MA0597.2	C_THAP1	164869	0.13322	87043	0.13213	83812	0.0338	3.80907e-111
EHF_MA0598.3	EHF	MA0598.3	C_Erg	164916	0.10095	70444	0.09917	66761	0.03304	1.5272e-110
KLF5_MA0599.1	KLF5	MA0599.1	C_KLF4	295781	0.17442	153489	0.1729	147830	0.03491	2.37584e-130
RFX2_MA0600.2	RFX2	MA0600.2	C_RFX3	40599	0.09534	15354	0.09757	15256	-0.06028	9.8258e-107
Arid3b_MA0601.1	Arid3b	MA0601.1	C_Arid3b	63452	0.0475	10819	0.04921	10469	-0.05758	2.83308e-116
Arid5a_MA0602.1	Arid5a	MA0602.1	C_Arid5a	38979	0.04763	6844	0.049	6587	-0.0483	1.65197e-97
Arntl_MA0603.1	Arntl	MA0603.1	C_MYC	29155	0.14564	14157	0.14712	13876	0.00036	0.0573357
Atf1_MA0604.1	Atf1	MA0604.1	C_Atf1	15857	0.20564	7751	0.20617	7455	0.00564	5.43197e-09
ATF3_MA0605.2	ATF3	MA0605.2	C_FOSL1::JUN	23515	0.14343	10477	0.14305	10100	0.01527	2.17225e-47
Nfat5_MA0606.2	Nfat5	MA0606.2	C_Nfat5	139342	0.05771	35258	0.0584	33869	-0.03609	1.18302e-109
BHLHA15_MA0607.2	BHLHA15	MA0607.2	C_ATOH7	39983	0.05714	11098	0.05683	10158	0.01861	2.60768e-57
Creb3l2_MA0608.1	Creb3l2	MA0608.1	C_Creb3l2	26247	0.14129	12297	0.1421	11981	0.00577	4.0751e-19
CREM_MA0609.2	CREM	MA0609.2	C_FOSL1::JUN	30044	0.14865	14488	0.14749	14098	0.0189	2.04804e-56
DMRT3_MA0610.1	DMRT3	MA0610.1	C_DMRT3	47593	0.05467	12767	0.05525	12204	-0.03499	2.91835e-85
Dux_MA0611.2	Dux	MA0611.2	C_Dux	36366	0.056	9206	0.05728	8985	-0.05278	6.08905e-100
EMX1_MA0612.2	EMX1	MA0612.2	C_ESX1	16857	0.07048	5002	0.07477	5301	-0.11002	1.32156e-111
FOXG1_MA0613.1	FOXG1	MA0613.1	C_FOXN3	83143	0.05959	21982	0.05989	20961	-0.02166	7.41288e-81
Foxj2_MA0614.1	Foxj2	MA0614.1	C_FOXN3	58381	0.0627	15972	0.06276	15153	-0.015	2.20558e-58
Gmeb1_MA0615.1	Gmeb1	MA0615.1	C_Gmeb1	9308	0.23028	5267	0.23177	5174	0.01538	6.17232e-23
HES2_MA0616.2	HES2	MA0616.2	C_MYC	34510	0.20578	19443	0.20797	19095	-0.00372	1.14742e-13
LBX1_MA0618.1	LBX1	MA0618.1	C_PAX4	44921	0.05774	11072	0.05981	11346	-0.0879	6.18767e-127
LIN54_MA0619.1	LIN54	MA0619.1	C_LIN54	84864	0.04863	16369	0.04967	15757	-0.04783	1.19928e-113
MITF_MA0620.3	MITF	MA0620.3	C_BHLHE41	33681	0.1173	14393	0.11707	13877	0.01196	1.38605e-43
mix-a_MA0621.1	mix-a	MA0621.1	C_ARGFX	45696	0.05367	9980	0.05536	9921	-0.07101	8.91864e-121
Mlxip_MA0622.1	Mlxip	MA0622.1	C_MYC	36072	0.12239	16674	0.12321	16097	0.01515	1.97151e-56
NEUROG1_MA0623.2	NEUROG1	MA0623.2	C_ATOH7	34480	0.05699	10065	0.05698	9307	-0.00558	1.45107e-15
Nfatc1_MA0624.2	Nfatc1	MA0624.2	C_Nfatc2	121370	0.06292	34658	0.06355	33226	-0.03347	4.09622e-100
NFATC3_MA0625.2	NFATC3	MA0625.2	C_Nfatc2	71545	0.07026	21776	0.07074	21222	-0.02993	5.14735e-97
Npas2_MA0626.1	Npas2	MA0626.1	C_MYC	33475	0.11634	15329	0.11734	14845	0.00787	3.89101e-20
POU2F3_MA0627.2	POU2F3	MA0627.2	C_POU2F3	100473	0.05455	22703	0.05585	21958	-0.05243	2.7277e-119
POU6F1_MA0628.1	POU6F1	MA0628.1	C_EMX2	22410	0.06186	5524	0.06428	5548	-0.06941	1.94114e-100
Rhox11_MA0629.1	Rhox11	MA0629.1	C_Rhox11	43714	0.07159	14895	0.0725	14604	-0.03774	4.32251e-97
SHOX_MA0630.1	SHOX	MA0630.1	C_PAX4	35593	0.06925	9793	0.07043	9766	-0.06231	2.16176e-110
Six3_MA0631.1	Six3	MA0631.1	C_Six3	34377	0.05966	10323	0.05985	9715	-0.01159	2.28592e-40
TCFL5_MA0632.2	TCFL5	MA0632.2	C_TCFL5	35856	0.26774	23436	0.27008	23418	-0.01676	7.56068e-52
Twist2_MA0633.2	Twist2	MA0633.2	C_Tcf12	118036	0.11135	58559	0.11388	58018	-0.03156	2.12816e-102
ALX3_MA0634.1	ALX3	MA0634.1	C_PAX4	45736	0.0617	11449	0.06351	11572	-0.06838	1.12841e-115
BARHL2_MA0635.1	BARHL2	MA0635.1	C_BARHL2	18079	0.06758	5522	0.06899	5442	-0.04981	2.77156e-83
BHLHE41_MA0636.1	BHLHE41	MA0636.1	C_BHLHE41	22013	0.15543	10806	0.15703	10590	0.00193	0.0301188
CREB3_MA0638.1	CREB3	MA0638.1	C_CREB3L4	24992	0.15177	11690	0.15266	11330	-0.00109	0.0117209
DBP_MA0639.1	DBP	MA0639.1	C_NFIL3	23094	0.06845	6130	0.06987	5965	-0.04254	4.3013e-85
ELF3_MA0640.2	ELF3	MA0640.2	C_Erg	193736	0.09836	83310	0.09686	79114	0.03109	5.20549e-114
ELF4_MA0641.1	ELF4	MA0641.1	C_Erg	49279	0.17144	24512	0.16948	23558	0.04305	3.20038e-102
EN2_MA0642.2	EN2	MA0642.2	C_DLX6	39786	0.07193	11200	0.07319	11230	-0.06295	3.11309e-110
Esrrg_MA0643.1	Esrrg	MA0643.1	C_NR5A1	71421	0.07306	27103	0.07276	25493	0.00843	5.17601e-44
ESX1_MA0644.2	ESX1	MA0644.2	C_ESX1	39568	0.07168	11430	0.07371	11605	-0.07418	1.92319e-116
ETV6_MA0645.1	ETV6	MA0645.1	C_Spi1	61834	0.16647	31668	0.16383	30316	0.05329	1.17108e-108
GCM1_MA0646.1	GCM1	MA0646.1	C_GCM2	51511	0.10173	22981	0.10114	21815	0.0231	1.09792e-66
GRHL1_MA0647.1	GRHL1	MA0647.1	C_GRHL2	29174	0.06403	8686	0.06425	8256	-0.01155	2.32819e-37
GSC_MA0648.1	GSC	MA0648.1	C_OTX2	31006	0.07398	10756	0.07413	10174	0.00777	3.82489e-26
HEY2_MA0649.1	HEY2	MA0649.1	C_MYC	36251	0.13992	17879	0.14129	17352	0.00854	6.96443e-30
Hoxa13_MA0650.3	Hoxa13	MA0650.3	C_HOXB13	75435	0.05559	16704	0.05651	15701	-0.03215	1.32403e-98
HOXC11_MA0651.2	HOXC11	MA0651.2	C_HOXC10	19973	0.06062	5278	0.06142	4967	-0.0391	8.45653e-81
IRF8_MA0652.1	IRF8	MA0652.1	C_Irf1	48476	0.07584	15864	0.0763	15427	-0.0244	4.68859e-69
IRF9_MA0653.1	IRF9	MA0653.1	C_Irf1	64719	0.06775	18648	0.06844	17930	-0.01872	1.3808e-69
ISX_MA0654.1	ISX	MA0654.1	C_PAX4	42838	0.06774	11743	0.06867	11666	-0.05766	2.18945e-107
JDP2_MA0655.1	JDP2	MA0655.1	C_FOSL1::JUN	60143	0.0618	17589	0.06337	18112	-0.07873	1.20787e-127
JDP2_MA0656.1	JDP2	MA0656.1	C_FOSL1::JUN	29940	0.12843	12634	0.12767	12131	0.00875	1.79231e-27
KLF13_MA0657.1	KLF13	MA0657.1	C_KLF13	62328	0.19379	31842	0.19196	30799	0.02724	5.46661e-86
LHX6_MA0658.1	LHX6	MA0658.1	C_EMX2	26794	0.06339	7162	0.06573	7164	-0.07846	7.58262e-114
Mafg_MA0659.3	Mafg	MA0659.3	C_MAFK	126709	0.08447	51811	0.08395	49834	0.00881	2.92065e-50
MEF2B_MA0660.1	MEF2B	MA0660.1	C_MEF2A	67310	0.05363	15103	0.05527	14894	-0.06711	4.019e-123
MEOX1_MA0661.1	MEOX1	MA0661.1	C_EMX2	35277	0.06314	9910	0.06597	10321	-0.09509	7.96626e-129
MIXL1_MA0662.1	MIXL1	MA0662.1	C_PAX4	35869	0.06914	10051	0.07047	10045	-0.0633	3.25354e-107
MLX_MA0663.1	MLX	MA0663.1	C_MYC	22097	0.14635	10277	0.14844	10120	-0.0066	3.50341e-16
MLXIPL_MA0664.1	MLXIPL	MA0664.1	C_MYC	23069	0.14136	10832	0.14395	10671	-0.01068	5.33536e-31
MSC_MA0665.1	MSC	MA0665.1	C_MSC	110050	0.08561	45455	0.08717	44485	-0.02521	3.36335e-96
MSX1_MA0666.2	MSX1	MA0666.2	C_DLX6	39206	0.07122	11306	0.07293	11394	-0.06498	2.69753e-112
MYF6_MA0667.1	MYF6	MA0667.1	C_Tcf21	64318	0.07517	23816	0.07603	22953	-0.01869	7.20148e-71
Neurod2_MA0668.2	Neurod2	MA0668.2	C_Neurod2	156713	0.0865	65069	0.08758	62782	-0.0078	8.21492e-57
NEUROG2_MA0669.1	NEUROG2	MA0669.1	C_ATOH7	57223	0.06563	18939	0.06603	18040	-0.01492	1.96203e-57
NFIA_MA0670.1	NFIA	MA0670.1	C_NFIX	87488	0.08424	35129	0.08571	33971	-0.02083	2.05731e-81
NFIX_MA0671.1	NFIX	MA0671.1	C_NFIX	94279	0.09627	41716	0.09775	40320	-0.00962	3.91795e-54
NKX2-3_MA0672.1	NKX2-3	MA0672.1	C_NKX2-3	74018	0.07495	27119	0.07524	26046	-0.01285	1.37957e-58
NKX2-8_MA0673.1	NKX2-8	MA0673.1	C_NKX2-3	64370	0.07352	22999	0.07379	22143	-0.01663	6.41773e-66
NKX6-1_MA0674.1	NKX6-1	MA0674.1	C_LHX5	52155	0.05699	13480	0.05854	13576	-0.0681	3.59032e-121
NKX6-2_MA0675.1	NKX6-2	MA0675.1	C_LHX5	51985	0.05812	13380	0.0595	13418	-0.06619	3.54412e-118
Nr2e1_MA0676.1	Nr2e1	MA0676.1	C_Nr2e1	69409	0.0573	18512	0.05778	17559	-0.0284	1.09066e-87
Nr2f6_MA0677.1	Nr2f6	MA0677.1	C_NR2C2	89555	0.08012	35490	0.07904	32725	0.03003	1.45489e-94
OLIG2_MA0678.1	OLIG2	MA0678.1	C_ATOH7	33142	0.05188	8277	0.05217	7566	-0.02108	1.00615e-64
ONECUT1_MA0679.2	ONECUT1	MA0679.2	C_ONECUT1	78011	0.04578	13758	0.0461	12563	-0.01862	1.70739e-73
Pax7_MA0680.2	Pax7	MA0680.2	C_Pax7	50992	0.04554	8743	0.04645	8429	-0.04462	8.49e-103
PHOX2B_MA0681.2	PHOX2B	MA0681.2	C_PHOX2A	91801	0.04223	13192	0.04334	12468	-0.04686	2.69772e-114
PITX1_MA0682.2	PITX1	MA0682.2	C_OTX2	51062	0.06614	16534	0.06518	14962	0.04888	2.49783e-109
POU4F2_MA0683.1	POU4F2	MA0683.1	C_POU4F2	73476	0.0495	14630	0.05086	14268	-0.05917	1.44423e-123
RUNX3_MA0684.2	RUNX3	MA0684.2	C_RUNX3	78118	0.07111	26765	0.07092	25360	-0.00459	1.21075e-23
SP4_MA0685.2	SP4	MA0685.2	C_PATZ1	256846	0.19925	143280	0.19785	138969	0.03237	5.90622e-126
SPDEF_MA0686.1	SPDEF	MA0686.1	C_SPDEF	28213	0.15995	13732	0.15965	13179	0.01981	1.02e-52
SPIC_MA0687.1	SPIC	MA0687.1	C_SPIC	103819	0.07746	36021	0.07661	34529	0.00661	3.02578e-41
TBX2_MA0688.1	TBX2	MA0688.1	C_TBX18	70879	0.06347	22740	0.06334	21484	-0.00961	1.74061e-43
TBX20_MA0689.1	TBX20	MA0689.1	C_TBX18	75050	0.06548	24376	0.06547	23114	-0.00699	2.60459e-38
TBX21_MA0690.2	TBX21	MA0690.2	C_TBX18	69666	0.06546	22728	0.06534	21648	-0.00889	4.20943e-43
TFAP4_MA0691.1	TFAP4	MA0691.1	C_TFAP4	88738	0.09321	39501	0.09481	38925	-0.02951	5.95092e-92
TFEB_MA0692.1	TFEB	MA0692.1	C_BHLHE41	47014	0.11599	20615	0.11585	19837	0.01256	6.28146e-50
Vdr_MA0693.3	Vdr	MA0693.3	C_Vdr	93888	0.06624	31418	0.06578	29083	0.02489	1.00259e-90
ZBTB7B_MA0694.1	ZBTB7B	MA0694.1	C_ZBTB7B	56856	0.11684	26268	0.11627	25083	0.03036	2.27316e-91
ZBTB7C_MA0695.1	ZBTB7C	MA0695.1	C_ZBTB7B	64739	0.12192	30892	0.12117	29523	0.03607	8.2968e-98
ZIC1_MA0696.1	ZIC1	MA0696.1	C_ZIC5	103445	0.15647	59036	0.15569	57853	0.02047	2.73692e-80
Zic3_MA0697.2	Zic3	MA0697.2	C_Zic2	208222	0.11991	105084	0.11974	101915	0.01093	2.75421e-70
ZBTB18_MA0698.1	ZBTB18	MA0698.1	C_TWIST1	127463	0.0753	48762	0.07598	47079	-0.01617	1.22328e-77
LBX2_MA0699.1	LBX2	MA0699.1	C_PAX4	34143	0.07469	10158	0.07595	10122	-0.05926	5.69581e-110
LHX2_MA0700.2	LHX2	MA0700.2	C_DLX6	43432	0.06666	11030	0.06814	10896	-0.06295	3.67365e-113
LHX9_MA0701.2	LHX9	MA0701.2	C_PAX4	35593	0.06925	9793	0.07043	9766	-0.0623	2.19598e-110
LMX1A_MA0702.2	LMX1A	MA0702.2	C_ARGFX	33834	0.05347	7795	0.05583	7991	-0.08338	1.26767e-122
LMX1B_MA0703.2	LMX1B	MA0703.2	C_ARGFX	51455	0.04827	10136	0.04974	10090	-0.06983	3.53169e-121
Lhx4_MA0704.1	Lhx4	MA0704.1	C_ARGFX	27053	0.05159	5965	0.05274	5870	-0.06841	1.92769e-105
Lhx8_MA0705.1	Lhx8	MA0705.1	C_PAX4	34655	0.0654	9779	0.06766	9901	-0.07661	4.46233e-115
MEOX2_MA0706.1	MEOX2	MA0706.1	C_LHX5	43031	0.05608	10667	0.0589	11064	-0.09885	8.64172e-137
MNX1_MA0707.2	MNX1	MA0707.2	C_MNX1	38490	0.0567	9124	0.05925	9349	-0.08665	2.21709e-128
MSX2_MA0708.2	MSX2	MA0708.2	C_DLX6	46789	0.06898	13090	0.07064	13155	-0.06607	9.68862e-117
Msx3_MA0709.1	Msx3	MA0709.1	C_DLX6	39206	0.07122	11306	0.07293	11394	-0.06498	2.69753e-112
NOTO_MA0710.1	NOTO	MA0710.1	C_EMX2	37175	0.07139	11678	0.07316	11635	-0.06343	3.98293e-109
OTX1_MA0711.1	OTX1	MA0711.1	C_OTX2	31179	0.06656	9681	0.06517	8669	0.06088	5.04173e-108
OTX2_MA0712.2	OTX2	MA0712.2	C_OTX2	63271	0.0619	18994	0.06118	17225	0.03574	3.59698e-103
PHOX2A_MA0713.1	PHOX2A	MA0713.1	C_PHOX2A	44893	0.04774	8362	0.04906	8116	-0.0599	1.6933e-114
PITX3_MA0714.1	PITX3	MA0714.1	C_OTX2	47965	0.06655	14926	0.066	13563	0.04289	1.02522e-106
PROP1_MA0715.1	PROP1	MA0715.1	C_PHOX2A	51834	0.04513	8395	0.04663	8149	-0.0563	3.02381e-112
PRRX1_MA0716.1	PRRX1	MA0716.1	C_PAX4	35593	0.06925	9793	0.07043	9766	-0.06231	2.16176e-110
RAX2_MA0717.1	RAX2	MA0717.1	C_PAX4	35593	0.06925	9793	0.07043	9766	-0.06231	2.16176e-110
RAX_MA0718.1	RAX	MA0718.1	C_GBX2	34222	0.06919	9646	0.07066	9579	-0.06083	1.8326e-109
RHOXF1_MA0719.1	RHOXF1	MA0719.1	C_OTX2	58274	0.06775	19171	0.06665	17484	0.03978	5.25426e-96
Shox2_MA0720.1	Shox2	MA0720.1	C_PAX4	35593	0.06925	9793	0.07043	9766	-0.06231	2.16176e-110
UNCX_MA0721.1	UNCX	MA0721.1	C_PAX4	35593	0.06925	9793	0.07043	9766	-0.06231	2.16176e-110
VAX1_MA0722.1	VAX1	MA0722.1	C_ESX1	38164	0.05846	9442	0.06152	9945	-0.10285	1.49248e-128
VAX2_MA0723.2	VAX2	MA0723.2	C_ESX1	25933	0.07966	8242	0.0825	8474	-0.0767	3.17879e-110
VENTX_MA0724.1	VENTX	MA0724.1	C_VENTX	23856	0.07313	7332	0.07458	7188	-0.04464	2.48059e-86
VSX1_MA0725.1	VSX1	MA0725.1	C_PAX4	39571	0.05952	9995	0.06209	10343	-0.09546	8.85122e-125
VSX2_MA0726.1	VSX2	MA0726.1	C_PAX4	39571	0.05952	9995	0.06209	10343	-0.09546	8.85122e-125
NR3C2_MA0727.1	NR3C2	MA0727.1	C_Ar	46422	0.08575	18986	0.08922	18697	-0.05481	3.52951e-107
Nr2F6_MA0728.1	Nr2F6	MA0728.1	C_Nr2F6	83970	0.0735	30028	0.07229	27389	0.04329	2.80708e-112
RARA_MA0729.1	RARA	MA0729.1	C_RARA	77694	0.06761	25857	0.06692	23686	0.02642	2.08793e-87
RARA_MA0730.1	RARA	MA0730.1	C_RARA	76882	0.0897	33074	0.08852	31200	0.03099	3.96668e-90
BCL6B_MA0731.1	BCL6B	MA0731.1	C_BCL6B	88286	0.06624	27603	0.06641	26036	-0.00058	0.000120524
EGR3_MA0732.1	EGR3	MA0732.1	C_EGR1	103427	0.19904	57473	0.1989	56101	0.01221	3.14364e-67
EGR4_MA0733.1	EGR4	MA0733.1	C_EGR1	119360	0.17316	61855	0.17292	59930	0.01719	2.92392e-78
Gli2_MA0734.3	Gli2	MA0734.3	C_Gli2	126996	0.11257	60542	0.11155	57497	0.03832	2.92993e-115
GLIS1_MA0735.1	GLIS1	MA0735.1	C_GLIS1	42001	0.13024	20435	0.12929	19553	0.03002	1.28347e-79
GLIS2_MA0736.1	GLIS2	MA0736.1	C_GLIS2	76587	0.14953	40922	0.14889	39688	0.02793	7.8863e-90
GLIS3_MA0737.1	GLIS3	MA0737.1	C_GLIS2	60585	0.11181	27676	0.11114	26552	0.02124	3.08727e-71
HIC2_MA0738.1	HIC2	MA0738.1	C_HIC2	87757	0.10447	40384	0.10435	38454	0.02097	3.43183e-75
Hic1_MA0739.1	Hic1	MA0739.1	C_Hic1	94577	0.09485	40814	0.09577	39422	-0.00496	1.41192e-31
KLF14_MA0740.2	KLF14	MA0740.2	C_KLF4	250834	0.19303	135401	0.19153	130953	0.03312	1.74628e-123
KLF16_MA0741.1	KLF16	MA0741.1	C_KLF9	228030	0.18873	120700	0.18739	116720	0.03442	2.32405e-129
KLF12_MA0742.2	KLF12	MA0742.2	C_PATZ1	222290	0.22781	131245	0.22622	128064	0.0336	3.87024e-122
SCRT1_MA0743.2	SCRT1	MA0743.2	C_SCRT2	72824	0.07632	28009	0.076	26331	0.01184	9.02527e-56
SCRT2_MA0744.2	SCRT2	MA0744.2	C_SCRT2	77883	0.08025	30648	0.07984	28966	0.0097	9.72869e-47
SNAI2_MA0745.2	SNAI2	MA0745.2	C_ASCL1	117950	0.07438	45355	0.07427	42378	0.02126	2.56127e-89
SP3_MA0746.2	SP3	MA0746.2	C_KLF9	191248	0.22005	106181	0.21813	102719	0.04227	1.58832e-128
SP8_MA0747.1	SP8	MA0747.1	C_KLF9	200750	0.17585	102692	0.17451	98818	0.0372	1.60758e-125
YY2_MA0748.2	YY2	MA0748.2	C_YY2	35810	0.24205	22998	0.24095	22710	0.02785	2.16228e-72
ZBED1_MA0749.1	ZBED1	MA0749.1	C_ZBED1	5960	0.12225	2407	0.12182	2298	-0.02109	4.13697e-29
ZBTB7A_MA0750.2	ZBTB7A	MA0750.2	C_ETS1	91367	0.18964	51065	0.18737	49320	0.0509	4.06443e-118
ZIC4_MA0751.1	ZIC4	MA0751.1	C_ZIC5	99486	0.16803	58551	0.16706	57330	0.02562	2.94817e-94
ZNF410_MA0752.1	ZNF410	MA0752.1	C_ZNF410	46835	0.06249	13274	0.06249	12574	-0.01899	8.57654e-66
ZNF740_MA0753.2	ZNF740	MA0753.2	C_ZNF740	206416	0.14946	104044	0.14915	100415	0.02227	1.65839e-100
CUX1_MA0754.2	CUX1	MA0754.2	C_ONECUT1	15625	0.0524	3526	0.05249	3182	-0.01885	2.51683e-39
CUX2_MA0755.1	CUX2	MA0755.1	C_ONECUT1	13738	0.05194	3139	0.05179	2868	-0.01081	6.15757e-24
ONECUT2_MA0756.2	ONECUT2	MA0756.2	C_ONECUT2	11221	0.06587	3238	0.06589	3005	-0.01207	6.95939e-21
ONECUT3_MA0757.1	ONECUT3	MA0757.1	C_ONECUT1	66027	0.045	11208	0.04553	10321	-0.02357	2.77326e-79
E2F7_MA0758.1	E2F7	MA0758.1	C_E2F7	39854	0.08076	13243	0.08142	12901	-0.03895	2.98585e-89
ELK3_MA0759.2	ELK3	MA0759.2	C_ETS1	26842	0.29534	16453	0.29293	15993	0.05294	2.40998e-99
ERF_MA0760.1	ERF	MA0760.1	C_ETS1	41310	0.16635	19947	0.16459	18949	0.04037	3.86982e-94
ETV1_MA0761.2	ETV1	MA0761.2	C_Erg	185755	0.09832	80000	0.09671	75792	0.03179	8.73328e-111
ETV2_MA0762.1	ETV2	MA0762.1	C_ETS1	51133	0.1297	22032	0.12816	20920	0.02671	9.86942e-83
ETV3_MA0763.1	ETV3	MA0763.1	C_ETS1	30425	0.2046	15505	0.20273	14749	0.04913	7.25982e-97
ETV4_MA0764.3	ETV4	MA0764.3	C_ETS1	30955	0.25985	17943	0.25718	17321	0.05307	8.1161e-101
ETV5_MA0765.3	ETV5	MA0765.3	C_ETS1	27298	0.2587	15639	0.25605	15083	0.05085	1.44438e-93
GATA5_MA0766.2	GATA5	MA0766.2	C_Gata3	41811	0.06365	13351	0.06407	12581	-0.01357	2.18036e-45
GCM2_MA0767.1	GCM2	MA0767.1	C_GCM2	41396	0.10426	18218	0.10338	17254	0.02733	1.26517e-74
Lef1_MA0768.2	Lef1	MA0768.2	C_Lef1	109937	0.0696	36240	0.06947	34151	0.00029	0.414144
TCF7_MA0769.2	TCF7	MA0769.2	C_Lef1	87573	0.06456	27044	0.06472	25575	-0.01779	1.4299e-75
HSF2_MA0770.1	HSF2	MA0770.1	C_HSF4	67665	0.06761	21142	0.0678	19959	-0.00605	2.95568e-29
HSF4_MA0771.1	HSF4	MA0771.1	C_HSF4	59665	0.07466	20456	0.07506	19497	-0.00617	1.00575e-27
IRF7_MA0772.1	IRF7	MA0772.1	C_IRF7	88912	0.05738	21738	0.05836	20944	-0.03468	3.85063e-96
MEF2D_MA0773.1	MEF2D	MA0773.1	C_MEF2A	77558	0.0518	16486	0.05325	16216	-0.06423	3.89618e-124
MEIS2_MA0774.1	MEIS2	MA0774.1	C_MEIS2	107995	0.08596	42422	0.08627	40984	-0.0194	9.4662e-82
MEIS3_MA0775.1	MEIS3	MA0775.1	C_MEIS2	87611	0.08386	33739	0.08399	32462	-0.0165	1.6512e-65
MYBL1_MA0776.1	MYBL1	MA0776.1	C_MYBL1	10943	0.08188	3961	0.08238	3755	-0.02479	2.17006e-46
MYBL2_MA0777.1	MYBL2	MA0777.1	C_MYBL2	10820	0.08956	3994	0.08941	3842	-0.01455	1.86015e-28
NFKB2_MA0778.1	NFKB2	MA0778.1	C_NFKB2	37755	0.11309	18389	0.11191	17557	0.03604	1.387e-90
PAX1_MA0779.1	PAX1	MA0779.1	C_PAX9	30834	0.1151	13813	0.11473	13334	0.00242	2.21924e-06
PAX3_MA0780.1	PAX3	MA0780.1	C_Pax7	20308	0.04919	3752	0.05049	3687	-0.04914	3.20255e-84
PAX9_MA0781.1	PAX9	MA0781.1	C_PAX9	35149	0.10978	15462	0.10958	14924	0.00096	0.878825
PKNOX1_MA0782.2	PKNOX1	MA0782.2	C_PBX3	112042	0.09144	44868	0.09115	43152	-0.00916	3.18192e-53
PKNOX2_MA0783.1	PKNOX2	MA0783.1	C_TGIF2LX	83250	0.07258	30747	0.07254	29260	-0.01068	6.37895e-55
POU1F1_MA0784.2	POU1F1	MA0784.2	C_POU1F1	78240	0.05536	17399	0.05703	16994	-0.06321	5.85983e-130
POU2F1_MA0785.1	POU2F1	MA0785.1	C_POU1F1	80701	0.05655	17901	0.05832	17650	-0.06748	1.0168e-127
POU3F1_MA0786.1	POU3F1	MA0786.1	C_POU1F1	91471	0.05231	18428	0.05386	17999	-0.06287	9.43915e-123
POU3F2_MA0787.1	POU3F2	MA0787.1	C_POU1F1	85615	0.05432	18177	0.05603	17788	-0.0637	3.2333e-130
POU3F3_MA0788.1	POU3F3	MA0788.1	C_POU1F1	86776	0.05164	16803	0.0534	16472	-0.06545	3.0881e-134
POU3F4_MA0789.1	POU3F4	MA0789.1	C_POU1F1	76672	0.05837	18478	0.05977	17972	-0.05553	3.88328e-121
POU4F1_MA0790.1	POU4F1	MA0790.1	C_POU4F2	75292	0.04754	13859	0.0488	13441	-0.0571	1.7631e-125
POU4F3_MA0791.1	POU4F3	MA0791.1	C_POU4F2	70925	0.04865	13383	0.05001	12993	-0.05673	8.63178e-119
POU5F1B_MA0792.1	POU5F1B	MA0792.1	C_POU1F1	77404	0.0586	18426	0.06018	18055	-0.06209	6.47433e-124
POU6F2_MA0793.1	POU6F2	MA0793.1	C_POU6F2	55156	0.06272	15907	0.06384	15723	-0.05295	4.20381e-108
PROX1_MA0794.1	PROX1	MA0794.1	C_PROX1	28434	0.08604	10308	0.08667	9863	-0.01077	1.2677e-34
SMAD3_MA0795.1	SMAD3	MA0795.1	C_SMAD3	28576	0.08244	11177	0.08203	10654	0.01305	7.69918e-33
TGIF1_MA0796.1	TGIF1	MA0796.1	C_TGIF2LX	73366	0.07113	26480	0.07111	25256	-0.01312	2.80962e-55
TGIF2_MA0797.1	TGIF2	MA0797.1	C_TGIF2LX	71498	0.07384	26435	0.07383	25216	-0.01263	2.76144e-54
RFX3_MA0798.3	RFX3	MA0798.3	C_RFX3	43601	0.10018	17137	0.1024	17020	-0.05718	2.75779e-107
RFX4_MA0799.2	RFX4	MA0799.2	C_RFX4	31636	0.11575	14490	0.11674	14172	-0.01353	1.97056e-40
EOMES_MA0800.1	EOMES	MA0800.1	C_TBX18	67986	0.06296	21286	0.06298	20265	-0.0149	2.58597e-64
MGA_MA0801.1	MGA	MA0801.1	C_TBX4	59332	0.07484	21822	0.07453	20797	0.00195	0.000145604
TBR1_MA0802.1	TBR1	MA0802.1	C_TBX18	70428	0.06163	21891	0.06158	20719	-0.013	4.47967e-58
TBX15_MA0803.1	TBX15	MA0803.1	C_TBX4	86385	0.07309	31054	0.07268	28964	0.02078	2.43986e-81
TBX19_MA0804.1	TBX19	MA0804.1	C_TBXT	34052	0.0637	10899	0.06385	10311	-0.00864	9.01047e-30
TBX1_MA0805.1	TBX1	MA0805.1	C_TBX4	65925	0.06851	22905	0.06832	21699	0.00036	0.773838
TBX4_MA0806.1	TBX4	MA0806.1	C_TBX4	65925	0.06851	22906	0.06832	21698	0.00034	0.733546
TBX5_MA0807.1	TBX5	MA0807.1	C_TBX4	88088	0.06896	30802	0.06837	28518	0.02409	1.79557e-80
TEAD3_MA0808.1	TEAD3	MA0808.1	C_TEAD4	61385	0.07436	21799	0.07485	20703	-0.01084	4.96844e-48
TEAD4_MA0809.2	TEAD4	MA0809.2	C_TEAD4	96624	0.07143	33969	0.07159	32004	1e-05	0.539529
TFAP2A_MA0810.1	TFAP2A	MA0810.1	C_TFAP2A	99966	0.17369	59012	0.17191	57238	0.03949	1.49924e-111
TFAP2B_MA0811.1	TFAP2B	MA0811.1	C_TFAP2A	83727	0.15389	46645	0.15209	45004	0.03886	8.05126e-107
TFAP2B_MA0812.1	TFAP2B	MA0812.1	C_TFAP2C	78534	0.15986	44253	0.15824	42743	0.03652	6.46325e-98
TFAP2B_MA0813.1	TFAP2B	MA0813.1	C_TFAP2A	73718	0.16707	42492	0.16538	41242	0.04164	1.08611e-104
TFAP2C_MA0814.2	TFAP2C	MA0814.2	C_TFAP2C	145845	0.16675	84374	0.1649	81486	0.04475	3.22174e-125
TFAP2C_MA0815.1	TFAP2C	MA0815.1	C_TFAP2A	65909	0.17618	39015	0.17429	37897	0.04283	7.42884e-104
Ascl2_MA0816.1	Ascl2	MA0816.1	C_Tcf12	140925	0.09866	64051	0.10061	63077	-0.02803	1.93672e-103
BHLHE23_MA0817.1	BHLHE23	MA0817.1	C_ATOH7	34336	0.05144	8631	0.05147	7957	-0.01133	2.25348e-40
BHLHE22_MA0818.2	BHLHE22	MA0818.2	C_ATOH7	27475	0.05353	7301	0.05373	6744	-0.01702	3.50845e-51
CLOCK_MA0819.2	CLOCK	MA0819.2	C_MYC	43019	0.08956	17437	0.0897	16651	0.00674	2.03672e-23
FIGLA_MA0820.1	FIGLA	MA0820.1	C_Rbpjl	104134	0.07367	39713	0.07408	37318	0.01087	4.18317e-60
HES5_MA0821.2	HES5	MA0821.2	C_MYC	27611	0.15293	14319	0.1536	13904	0.01035	2.45257e-31
HES7_MA0822.1	HES7	MA0822.1	C_HES7	31562	0.12122	15016	0.12177	14498	0.0042	4.28794e-14
HEY1_MA0823.1	HEY1	MA0823.1	C_MYC	31945	0.1464	16065	0.14786	15690	0.0037	2.30679e-09
MNT_MA0825.1	MNT	MA0825.1	C_MYC	33056	0.125	15531	0.12635	15048	0.00758	1.4375e-23
OLIG1_MA0826.1	OLIG1	MA0826.1	C_ATOH7	31756	0.0531	8407	0.05356	7886	-0.02094	3.38212e-61
OLIG3_MA0827.1	OLIG3	MA0827.1	C_ATOH7	39158	0.05334	10131	0.0538	9366	-0.02345	2.70788e-67
SREBF2_MA0828.2	SREBF2	MA0828.2	C_SREBF2	17845	0.124	7312	0.12489	7153	-0.00346	0.000102221
SREBF1_MA0829.2	SREBF1	MA0829.2	C_SREBF2	42239	0.09018	15995	0.09011	15241	0.00333	2.25921e-08
TCF4_MA0830.2	TCF4	MA0830.2	C_ASCL1	145256	0.10695	66365	0.10723	63310	0.01771	9.79933e-84
TFE3_MA0831.3	TFE3	MA0831.3	C_BHLHE41	28649	0.13494	13285	0.1356	12885	0.00735	2.06562e-24
Tcf21_MA0832.1	Tcf21	MA0832.1	C_Tcf21	72413	0.08715	29999	0.08878	29258	-0.02724	2.2048e-88
ATF4_MA0833.2	ATF4	MA0833.2	C_CEBPG	52724	0.06443	15206	0.06507	14481	-0.03353	9.66199e-88
ATF7_MA0834.1	ATF7	MA0834.1	C_FOSL1::JUN	21735	0.14228	9378	0.14191	9050	0.00916	1.66396e-19
BATF3_MA0835.2	BATF3	MA0835.2	C_FOSL1::JUN	89725	0.06736	29191	0.06868	29731	-0.06596	2.97538e-128
CEBPD_MA0836.2	CEBPD	MA0836.2	C_CEBPB	48975	0.06782	15161	0.06845	14638	-0.03688	3.66938e-98
CEBPE_MA0837.2	CEBPE	MA0837.2	C_CEBPB	7697	0.09932	2874	0.09857	2717	-0.00778	4.74267e-12
CEBPG_MA0838.1	CEBPG	MA0838.1	C_CEBPB	14604	0.08878	5098	0.08867	4916	-0.02755	2.21945e-62
CREB3L1_MA0839.1	CREB3L1	MA0839.1	C_CREB3L4	36391	0.11831	16194	0.11874	15622	0.00191	5.88794e-05
Creb5_MA0840.1	Creb5	MA0840.1	C_FOSL1::JUN	29704	0.12232	11735	0.1223	11295	-0.0014	0.0964885
NFE2_MA0841.1	NFE2	MA0841.1	C_NFE2	55321	0.06616	17589	0.0674	18008	-0.07097	7.79465e-123
NRL_MA0842.2	NRL	MA0842.2	C_MAFF	62171	0.07335	22116	0.07355	21392	-0.02519	5.11994e-78
TEF_MA0843.1	TEF	MA0843.1	C_NFIL3	23743	0.06385	6117	0.06523	6014	-0.04257	1.3164e-84
XBP1_MA0844.1	XBP1	MA0844.1	C_XBP1	22887	0.12802	10184	0.12827	9862	-0.00278	0.00549848
FOXB1_MA0845.1	FOXB1	MA0845.1	C_FOXC2	100909	0.04734	20095	0.04748	18361	-0.01636	1.03207e-71
FOXC2_MA0846.1	FOXC2	MA0846.1	C_FOXC2	139737	0.05006	28957	0.05024	26994	-0.01672	2.27801e-85
FOXD2_MA0847.3	FOXD2	MA0847.3	C_FOXE1	126936	0.05362	29942	0.05363	28001	-0.00796	9.76765e-47
FOXO4_MA0848.1	FOXO4	MA0848.1	C_FOXN3	48756	0.07205	16063	0.07232	15600	-0.02358	3.47309e-75
FOXO6_MA0849.1	FOXO6	MA0849.1	C_FOXN3	48756	0.07205	16063	0.07232	15600	-0.02358	3.47309e-75
FOXP3_MA0850.1	FOXP3	MA0850.1	C_FOXN3	48756	0.07205	16063	0.07232	15600	-0.02358	3.47309e-75
Foxj3_MA0851.1	Foxj3	MA0851.1	C_FOXN3	108256	0.05582	25903	0.05581	24195	-0.01242	2.11769e-63
FOXK1_MA0852.2	FOXK1	MA0852.2	C_FOXN3	73463	0.07257	24385	0.07277	23365	-0.01381	1.82211e-56
Alx4_MA0853.1	Alx4	MA0853.1	C_Alx1	29058	0.0617	7708	0.06332	7743	-0.07602	1.80416e-108
Alx1_MA0854.1	Alx1	MA0854.1	C_Alx1	30791	0.0613	7966	0.06321	7997	-0.0781	1.30377e-113
RXRB_MA0855.1	RXRB	MA0855.1	C_NR2C2	83038	0.07685	31545	0.07577	28979	0.03088	2.09548e-99
RXRG_MA0856.1	RXRG	MA0856.1	C_NR2C2	80290	0.0757	30107	0.07471	27619	0.02975	4.27537e-91
Rarb_MA0857.1	Rarb	MA0857.1	C_Nr2F6	83671	0.06778	27904	0.06698	25696	0.02876	7.86226e-94
Rarb_MA0858.1	Rarb	MA0858.1	C_RARA	72299	0.08043	28530	0.07951	26989	0.01761	3.12071e-69
Rarg_MA0859.1	Rarg	MA0859.1	C_Nr2F6	76262	0.06971	25936	0.06889	23836	0.03197	3.88207e-98
Rarg_MA0860.1	Rarg	MA0860.1	C_Rarg	83063	0.08433	34265	0.08332	32462	0.02609	4.07827e-91
TP73_MA0861.1	TP73	MA0861.1	C_TP73	45496	0.08303	16832	0.08218	15811	0.01497	1.36943e-54
GMEB2_MA0862.1	GMEB2	MA0862.1	C_GMEB2	5727	0.11703	2089	0.11745	2006	-0.02104	3.63686e-31
MTF1_MA0863.1	MTF1	MA0863.1	C_MTF1	53992	0.10702	25223	0.10779	24574	-0.00842	8.70918e-43
E2F2_MA0864.2	E2F2	MA0864.2	C_ZNF417	8876	0.20183	5384	0.20136	5278	0.01472	5.51526e-29
E2F8_MA0865.2	E2F8	MA0865.2	C_E2F8	22589	0.20427	13005	0.20251	12892	0.02008	1.41883e-47
SOX21_MA0866.1	SOX21	MA0866.1	C_SOX21	66946	0.06201	18928	0.06254	18275	-0.03425	1.85739e-98
SOX4_MA0867.2	SOX4	MA0867.2	C_SOX4	120443	0.09044	45217	0.09047	44054	-0.01838	1.98966e-81
SOX8_MA0868.2	SOX8	MA0868.2	C_Sox17	66918	0.08434	23576	0.08332	22616	-0.01413	2.69498e-60
Sox11_MA0869.2	Sox11	MA0869.2	C_SOX4	162961	0.08519	60458	0.08574	58830	-0.02207	8.18246e-100
Sox1_MA0870.1	Sox1	MA0870.1	C_SOX21	54693	0.06419	16068	0.06471	15455	-0.03289	7.67282e-89
TFEC_MA0871.2	TFEC	MA0871.2	C_MYC	46085	0.1302	21510	0.13071	20878	0.01014	5.62869e-42
TFAP2A_MA0872.1	TFAP2A	MA0872.1	C_TFAP2A	69699	0.17792	41622	0.17595	40433	0.04816	6.68225e-113
HOXD12_MA0873.1	HOXD12	MA0873.1	C_HOXC10	18969	0.0581	4676	0.05932	4514	-0.05565	4.79384e-93
Arx_MA0874.1	Arx	MA0874.1	C_Alx1	27634	0.06409	7163	0.06563	7026	-0.06161	9.60131e-96
BARX1_MA0875.1	BARX1	MA0875.1	C_TLX2	38168	0.07219	11708	0.07418	11723	-0.06568	6.30738e-112
BSX_MA0876.1	BSX	MA0876.1	C_DLX6	37252	0.0763	11874	0.07653	11519	-0.02328	2.45391e-64
BARHL1_MA0877.3	BARHL1	MA0877.3	C_BARHL1	10224	0.07148	3399	0.07248	3311	-0.03058	6.61103e-52
CDX1_MA0878.3	CDX1	MA0878.3	C_HOXA10	55576	0.05574	13396	0.05655	12654	-0.03198	1.36348e-92
DLX1_MA0879.2	DLX1	MA0879.2	C_Dlx2	44156	0.06895	12402	0.07132	12679	-0.07799	1.77047e-129
Dlx3_MA0880.1	Dlx3	MA0880.1	C_DLX6	29877	0.06499	8007	0.0665	8044	-0.06611	8.14638e-110
Dlx4_MA0881.1	Dlx4	MA0881.1	C_DLX6	29877	0.06499	8007	0.0665	8044	-0.06611	8.14638e-110
DLX6_MA0882.1	DLX6	MA0882.1	C_DLX6	30346	0.06717	8581	0.06943	8777	-0.07534	5.68743e-111
Dmbx1_MA0883.1	Dmbx1	MA0883.1	C_Dmbx1	29853	0.0671	9160	0.06724	8770	-0.01123	2.85692e-38
DUXA_MA0884.2	DUXA	MA0884.2	C_DUXA	25493	0.05506	5992	0.0563	5874	-0.0401	1.53551e-79
Dlx2_MA0885.2	Dlx2	MA0885.2	C_Dlx2	47770	0.0649	13117	0.06771	13483	-0.08465	4.09976e-129
EMX2_MA0886.1	EMX2	MA0886.1	C_EMX2	25143	0.07006	7430	0.07315	7706	-0.0914	3.52687e-116
EVX1_MA0887.1	EVX1	MA0887.1	C_EVX2	26971	0.07411	8820	0.07707	9051	-0.08752	2.79794e-119
EVX2_MA0888.1	EVX2	MA0888.1	C_EVX2	27055	0.07414	8984	0.07703	9251	-0.0858	3.84923e-119
GBX1_MA0889.1	GBX1	MA0889.1	C_GBX2	27717	0.0806	8823	0.0826	8944	-0.07025	1.03504e-107
GBX2_MA0890.1	GBX2	MA0890.1	C_GBX2	34795	0.07699	10741	0.07896	10822	-0.06479	1.23344e-108
GSC2_MA0891.1	GSC2	MA0891.1	C_OTX2	44642	0.06534	13883	0.06464	12692	0.0417	2.85357e-99
GSX1_MA0892.1	GSX1	MA0892.1	C_PAX4	41513	0.06774	11989	0.06906	11971	-0.05362	2.37821e-101
GSX2_MA0893.2	GSX2	MA0893.2	C_ESX1	39167	0.07353	12927	0.07546	13053	-0.0577	2.63089e-106
HESX1_MA0894.1	HESX1	MA0894.1	C_GBX2	32229	0.0716	9502	0.07326	9514	-0.07052	7.3352e-111
HMBOX1_MA0895.1	HMBOX1	MA0895.1	C_HMBOX1	30684	0.06767	9527	0.06777	8944	-0.00587	1.21288e-23
Hmx1_MA0896.1	Hmx1	MA0896.1	C_Hmx3	42099	0.06168	11650	0.0635	11572	-0.06505	2.05888e-114
Hmx2_MA0897.1	Hmx2	MA0897.1	C_Hmx3	50568	0.05593	12139	0.05733	11917	-0.05497	2.1299e-112
Hmx3_MA0898.1	Hmx3	MA0898.1	C_Hmx3	50845	0.0543	11885	0.05586	11688	-0.05978	2.8671e-114
HOXA10_MA0899.1	HOXA10	MA0899.1	C_HOXA10	69890	0.05045	14905	0.05141	14140	-0.04003	7.53988e-100
HOXA2_MA0900.2	HOXA2	MA0900.2	C_ESX1	16857	0.07048	5002	0.07477	5301	-0.11001	1.33342e-111
HOXB13_MA0901.2	HOXB13	MA0901.2	C_HOXB13	105184	0.04763	18639	0.04841	17362	-0.03002	4.59921e-102
HOXB2_MA0902.2	HOXB2	MA0902.2	C_ESX1	23668	0.07088	7206	0.07484	7572	-0.09924	9.9603e-116
HOXB3_MA0903.1	HOXB3	MA0903.1	C_EMX2	42195	0.07405	13442	0.07608	13571	-0.0651	3.73918e-107
HOXB5_MA0904.2	HOXB5	MA0904.2	C_ESX1	16857	0.07048	5002	0.07477	5301	-0.11002	1.32156e-111
HOXC10_MA0905.1	HOXC10	MA0905.1	C_HOXC10	33468	0.05265	7489	0.05361	7156	-0.05246	2.11402e-97
HOXC12_MA0906.1	HOXC12	MA0906.1	C_HOXC10	23837	0.05674	5883	0.05765	5608	-0.04191	1.25243e-86
HOXC13_MA0907.1	HOXC13	MA0907.1	C_HOXC13	37768	0.06016	10057	0.06113	9794	-0.0411	9.79729e-95
HOXD11_MA0908.1	HOXD11	MA0908.1	C_HOXC10	23667	0.05459	5426	0.05564	5143	-0.05075	1.61366e-94
Hoxd13_MA0909.3	Hoxd13	MA0909.3	C_CDX2	67742	0.0562	15280	0.05704	14363	-0.02851	4.82819e-86
HOXD8_MA0910.2	HOXD8	MA0910.2	C_HOXB8	40531	0.06356	11984	0.06546	11906	-0.06696	4.61942e-111
Hoxa11_MA0911.1	Hoxa11	MA0911.1	C_HOXC10	21330	0.0576	5291	0.05858	5062	-0.05278	9.00083e-89
HOXD3_MA0912.2	HOXD3	MA0912.2	C_ESX1	40565	0.06485	11663	0.06739	11982	-0.07832	4.76673e-120
HOXD9_MA0913.2	HOXD9	MA0913.2	C_HOXA10	58953	0.05159	13302	0.05252	12740	-0.04236	3.2043e-101
ISL2_MA0914.1	ISL2	MA0914.1	C_ISL2	47914	0.06709	15501	0.06807	15069	-0.0299	4.38786e-83
HES1_MA1099.2	HES1	MA1099.2	C_MYC	35770	0.2458	22515	0.24795	22397	-0.00892	4.33219e-30
ASCL1_MA1100.2	ASCL1	MA1100.2	C_Tcf12	109165	0.10432	51868	0.10646	51025	-0.02641	1.95096e-92
BACH2_MA1101.2	BACH2	MA1101.2	C_NFE2	52782	0.06714	17271	0.06831	17596	-0.06655	1.97193e-117
CTCFL_MA1102.2	CTCFL	MA1102.2	C_CTCFL	143165	0.20014	89364	0.19848	87742	0.032	2.90327e-110
FOXK2_MA1103.2	FOXK2	MA1103.2	C_FOXN3	73265	0.06586	22131	0.06605	21166	-0.01842	8.49549e-72
GATA6_MA1104.2	GATA6	MA1104.2	C_Gata3	59714	0.05331	15193	0.05356	14146	-0.0253	1.27815e-76
GRHL2_MA1105.2	GRHL2	MA1105.2	C_GRHL2	76105	0.06736	25176	0.06764	23842	-0.00974	6.97358e-45
HIF1A_MA1106.1	HIF1A	MA1106.1	C_ARNT::HIF1A	24332	0.12779	11819	0.12895	11492	0.00579	1.78093e-10
KLF9_MA1107.2	KLF9	MA1107.2	C_KLF9	284622	0.13634	134456	0.1352	128515	0.03233	2.57787e-126
MXI1_MA1108.2	MXI1	MA1108.2	C_MXI1	125352	0.07002	45578	0.06914	41922	0.02765	2.66566e-98
NEUROD1_MA1109.1	NEUROD1	MA1109.1	C_Neurod2	157141	0.08863	66438	0.08947	63895	-0.00225	1.17662e-15
Nr1H4_MA1110.2	Nr1H4	MA1110.2	C_Nr1H2	105718	0.0849	45790	0.08348	43024	0.03825	2.32041e-110
NR2F2_MA1111.1	NR2F2	MA1111.1	C_Nr1H2	82963	0.07275	31738	0.07177	29418	0.02935	1.24681e-90
NR4A1_MA1112.2	NR4A1	MA1112.2	C_NR4A1	104692	0.06931	34435	0.06949	32642	-0.01208	2.39153e-64
PBX2_MA1113.2	PBX2	MA1113.2	C_MEIS2	59641	0.05211	13058	0.05316	12294	-0.03786	6.5493e-98
PBX3_MA1114.1	PBX3	MA1114.1	C_PBX3	135325	0.10033	58393	0.09978	55931	0.00445	2.75706e-27
POU5F1_MA1115.1	POU5F1	MA1115.1	C_POU2F3	98310	0.05863	24621	0.06002	24062	-0.05561	4.81989e-125
RBPJ_MA1116.1	RBPJ	MA1116.1	C_RBPJ	172193	0.0877	68614	0.08793	65324	0.00507	1.8649e-40
RELB_MA1117.1	RELB	MA1117.1	C_RELB	67850	0.0954	27890	0.09562	26823	-0.00242	1.27423e-07
SIX1_MA1118.1	SIX1	MA1118.1	C_SIX1	62195	0.06663	19819	0.06685	18663	-0.01366	2.00582e-54
SIX2_MA1119.1	SIX2	MA1119.1	C_SIX2	80740	0.06824	27041	0.06832	25554	-0.00944	2.02675e-46
SOX13_MA1120.1	SOX13	MA1120.1	C_SOX13	72879	0.08966	27746	0.08844	26815	-0.00816	5.24313e-45
TEAD2_MA1121.1	TEAD2	MA1121.1	C_TEAD4	83114	0.07671	30722	0.07697	29018	0.00108	0.000519505
TFDP1_MA1122.1	TFDP1	MA1122.1	C_E2F6	63921	0.26277	43176	0.26114	42809	0.02523	6.88384e-79
TWIST1_MA1123.2	TWIST1	MA1123.2	C_TWIST1	127669	0.07671	49600	0.07713	47806	-0.00844	4.14847e-56
ZNF24_MA1124.1	ZNF24	MA1124.1	C_ZNF24	82360	0.06387	24189	0.0644	22994	-0.02015	8.64832e-86
ZNF384_MA1125.1	ZNF384	MA1125.1	C_ZNF384	219828	0.04653	38474	0.04728	36637	-0.0313	1.68427e-117
FOSJUN_MA1126.1	FOS::JUN	MA1126.1	C_FOSL1::JUN	36136	0.11301	14442	0.11227	13929	0.00401	2.21866e-13
FOSBJUN_MA1127.1	FOSB::JUN	MA1127.1	C_FOSL1::JUN	30570	0.12882	12719	0.12814	12258	0.01012	1.63e-33
FOSL1JUN_MA1128.1	FOSL1::JUN	MA1128.1	C_FOSL1::JUN	77799	0.07211	26208	0.07364	26949	-0.07591	7.43956e-131
FOSL1JUN_MA1129.1	FOSL1::JUN	MA1129.1	C_FOSL1::JUN	20385	0.13736	8516	0.13696	8208	0.00388	3.79162e-09
FOSL2JUN_MA1130.1	FOSL2::JUN	MA1130.1	C_FOSL1::JUN	70253	0.07169	23607	0.07323	24321	-0.07656	1.598e-131
FOSL2JUN_MA1131.1	FOSL2::JUN	MA1131.1	C_FOSL1::JUN	36698	0.12155	15050	0.12066	14502	0.00851	9.44117e-27
JUNJUNB_MA1132.1	JUN::JUNB	MA1132.1	C_FOSL1::JUN	60867	0.07502	20195	0.07646	20766	-0.07031	8.21546e-130
JUNJUNB_MA1133.1	JUN::JUNB	MA1133.1	C_FOSL1::JUN	33837	0.12775	14534	0.12654	13960	0.01137	2.08354e-34
FOSJUNB_MA1134.1	FOS::JUNB	MA1134.1	C_FOSL1::JUN	65549	0.06921	21709	0.07091	22408	-0.08012	6.50375e-127
FOSBJUNB_MA1135.1	FOSB::JUNB	MA1135.1	C_FOSL1::JUN	68463	0.06875	22585	0.07045	23303	-0.07911	2.14274e-130
FOSBJUNB_MA1136.1	FOSB::JUNB	MA1136.1	C_FOSL1::JUN	22689	0.13467	9375	0.13453	9023	0.00347	5.90494e-05
FOSL1JUNB_MA1137.1	FOSL1::JUNB	MA1137.1	C_FOSL1::JUN	70272	0.07002	23368	0.07159	24145	-0.07808	1.36978e-131
FOSL2JUNB_MA1138.1	FOSL2::JUNB	MA1138.1	C_FOSL1::JUN	66573	0.06684	21243	0.06855	21981	-0.08261	1.99089e-139
FOSL2JUNB_MA1139.1	FOSL2::JUNB	MA1139.1	C_FOSL1::JUN	23260	0.13394	9752	0.13331	9400	0.00706	1.82191e-18
JUNB_MA1140.2	JUNB	MA1140.2	C_FOSL1::JUN	23022	0.14939	10376	0.14969	9999	0.00647	6.64889e-19
FOSJUND_MA1141.1	FOS::JUND	MA1141.1	C_FOSL1::JUN	77052	0.07294	26231	0.07448	27031	-0.07547	4.46428e-134
FOSL1JUND_MA1142.1	FOSL1::JUND	MA1142.1	C_FOSL1::JUN	70965	0.06962	23020	0.07108	23650	-0.07645	7.95139e-136
FOSL1JUND_MA1143.1	FOSL1::JUND	MA1143.1	C_FOSL1::JUND	26499	0.13094	10325	0.13146	10075	-0.01868	4.67678e-52
FOSL2JUND_MA1144.1	FOSL2::JUND	MA1144.1	C_FOSL1::JUN	66554	0.06932	21908	0.07102	22630	-0.07952	3.35307e-131
FOSL2JUND_MA1145.1	FOSL2::JUND	MA1145.1	C_FOSL1::JUN	33139	0.13144	14110	0.13057	13586	0.01111	5.62287e-29
NR1H4RXRA_MA1146.1	NR1H4::RXRA	MA1146.1	C_NR2F1	41851	0.09497	17926	0.09425	17095	0.01589	2.35177e-54
NR4A2RXRA_MA1147.1	NR4A2::RXRA	MA1147.1	C_NR2F1	39773	0.10272	18148	0.10129	17234	0.03837	1.29142e-88
PPARARXRA_MA1148.1	PPARA::RXRA	MA1148.1	C_PPARA::RXRA	87981	0.07992	33882	0.07912	31590	0.0197	3.90972e-80
RARARXRG_MA1149.1	RARA::RXRG	MA1149.1	C_RARA::RXRG	85824	0.11137	41003	0.10992	38869	0.04331	1.52138e-111
RORB_MA1150.1	RORB	MA1150.1	C_RORB	58594	0.07423	21515	0.07371	20379	0.00289	4.65561e-16
RORC_MA1151.1	RORC	MA1151.1	C_RORB	56594	0.07381	20258	0.07343	19357	0.0005	0.719398
SOX15_MA1152.1	SOX15	MA1152.1	C_SOX15	128247	0.06957	37172	0.06918	35507	-0.0131	3.60239e-71
Smad4_MA1153.1	Smad4	MA1153.1	C_Smad4	59911	0.08364	24158	0.08363	23084	0.01258	2.38975e-56
ZNF282_MA1154.1	ZNF282	MA1154.1	C_ZNF282	77327	0.08395	29979	0.08372	28562	0.00231	7.12298e-07
ZSCAN4_MA1155.1	ZSCAN4	MA1155.1	C_ZSCAN4	160202	0.06861	55797	0.06836	52437	-0.00075	4.73346e-05
IRF3_MA1418.1	IRF3	MA1418.1	C_IRF3	107879	0.0693	32956	0.06972	31484	-0.01337	3.87957e-67
IRF4_MA1419.1	IRF4	MA1419.1	C_Irf1	44223	0.07347	14001	0.07402	13498	-0.02117	7.79801e-71
IRF5_MA1420.1	IRF5	MA1420.1	C_IRF5	40455	0.08229	14090	0.08232	13489	-0.00484	2.86877e-18
TCF7L1_MA1421.1	TCF7L1	MA1421.1	C_TCF7L1	102856	0.06557	32445	0.06562	30541	-0.01021	1.28148e-51
ARGFX_MA1463.1	ARGFX	MA1463.1	C_ARGFX	40670	0.05427	9012	0.05589	9145	-0.07493	2.45207e-120
ARNT2_MA1464.1	ARNT2	MA1464.1	C_MYC	28469	0.14294	13834	0.14494	13572	-0.00377	3.91071e-05
ATF6_MA1466.1	ATF6	MA1466.1	C_CREB3L4	34454	0.12057	15384	0.12042	14803	0.0074	1.9794e-22
Atoh1_MA1467.2	Atoh1	MA1467.2	C_Neurod2	132849	0.07759	51171	0.0782	49071	-0.00789	1.53791e-49
ATOH7_MA1468.1	ATOH7	MA1468.1	C_ATOH7	68916	0.06237	21560	0.06234	20129	0.00749	8.74232e-37
BACH2_MA1470.1	BACH2	MA1470.1	C_BACH2	26897	0.08451	8790	0.08586	8448	-0.02422	2.97489e-59
BARX2_MA1471.1	BARX2	MA1471.1	C_BARX2	52559	0.05064	10349	0.05225	9937	-0.05344	1.06206e-105
Bhlha15_MA1472.2	Bhlha15	MA1472.2	C_Tcf12	107718	0.10678	52277	0.10906	51521	-0.02877	5.21365e-96
CDX4_MA1473.1	CDX4	MA1473.1	C_HOXA10	58677	0.05273	13328	0.05341	12639	-0.03303	9.536e-95
CREB3L4_MA1474.1	CREB3L4	MA1474.1	C_CREB3L4	32740	0.16862	16722	0.16858	16214	0.00883	7.35156e-35
CREB3L4_MA1475.1	CREB3L4	MA1475.1	C_FOSL1::JUN	17585	0.20679	9042	0.20717	8805	0.01002	2.16285e-23
Dlx5_MA1476.2	Dlx5	MA1476.2	C_Dlx2	46897	0.06324	12693	0.06618	13104	-0.08707	2.87464e-126
DMRTA2_MA1478.1	DMRTA2	MA1478.1	C_DMRTA1	48039	0.05579	12213	0.0564	11855	-0.0433	2.46643e-103
DMRTC2_MA1479.1	DMRTC2	MA1479.1	C_DMRTA1	54735	0.05394	13363	0.05459	12817	-0.03776	5.69243e-95
DPRX_MA1480.1	DPRX	MA1480.1	C_DPRX	31917	0.07177	10798	0.07228	10458	-0.0211	3.84825e-66
DRGX_MA1481.1	DRGX	MA1481.1	C_ESX1	25080	0.08144	7870	0.08393	8062	-0.07384	1.96921e-108
ELF2_MA1483.2	ELF2	MA1483.2	C_Erg	54434	0.15607	25659	0.1543	24508	0.03597	9.47741e-94
ETS2_MA1484.1	ETS2	MA1484.1	C_ETS1	46869	0.18412	24422	0.18226	23431	0.03955	2.67161e-93
FERD3L_MA1485.1	FERD3L	MA1485.1	C_FERD3L	81447	0.10759	38287	0.10859	37450	-0.01978	1.4739e-74
FOXE1_MA1487.2	FOXE1	MA1487.2	C_FOXE1	141090	0.05401	33501	0.05404	31470	-0.00981	1.16051e-60
FOXN3_MA1489.1	FOXN3	MA1489.1	C_FOXN3	12965	0.07355	4065	0.0736	3867	-0.00994	3.14824e-23
GLI3_MA1491.2	GLI3	MA1491.2	C_GLI3	77898	0.108	35652	0.10714	34039	0.03113	1.0211e-94
HES6_MA1493.1	HES6	MA1493.1	C_HES6	39775	0.10265	17153	0.10364	16562	-0.00324	3.97394e-09
HNF4A_MA1494.1	HNF4A	MA1494.1	C_HNF4A	64811	0.08062	24602	0.07978	22923	0.0248	3.14606e-84
HOXA1_MA1495.1	HOXA1	MA1495.1	C_ESX1	16857	0.07048	5002	0.07477	5301	-0.11002	1.32156e-111
HOXA4_MA1496.1	HOXA4	MA1496.1	C_HOXD4	39596	0.06372	12029	0.06469	11761	-0.0503	4.91246e-101
HOXA6_MA1497.1	HOXA6	MA1497.1	C_HOXB7	32532	0.06735	9685	0.07099	9965	-0.09171	1.40811e-117
HOXA7_MA1498.2	HOXA7	MA1498.2	C_HOXB8	38051	0.0638	11197	0.06516	10935	-0.05025	2.90532e-101
HOXB4_MA1499.1	HOXB4	MA1499.1	C_HOXD4	39871	0.05623	10274	0.05746	10145	-0.06318	4.21834e-109
HOXB6_MA1500.1	HOXB6	MA1500.1	C_HOXB6	38165	0.05862	10185	0.0608	10274	-0.07375	6.66628e-117
HOXB7_MA1501.1	HOXB7	MA1501.1	C_HOXB7	33530	0.06737	10159	0.07034	10401	-0.08193	9.1877e-120
HOXB8_MA1502.1	HOXB8	MA1502.1	C_HOXB8	40531	0.06356	11984	0.06546	11906	-0.06699	4.42148e-111
HOXB9_MA1503.1	HOXB9	MA1503.1	C_HOXC10	25309	0.05423	5857	0.05508	5570	-0.04737	1.69829e-85
HOXC4_MA1504.1	HOXC4	MA1504.1	C_HOXD4	38332	0.06569	11823	0.06652	11616	-0.04333	2.79928e-90
HOXC8_MA1505.1	HOXC8	MA1505.1	C_LHX5	23488	0.05748	6010	0.06068	6346	-0.10569	5.13551e-127
HOXD10_MA1506.1	HOXD10	MA1506.1	C_HOXC10	24924	0.05782	6072	0.05897	5807	-0.05036	5.15368e-90
HOXD4_MA1507.1	HOXD4	MA1507.1	C_HOXD4	34694	0.06143	9908	0.06315	9894	-0.06383	1.63616e-114
IKZF1_MA1508.1	IKZF1	MA1508.1	C_IKZF1	211021	0.08007	79981	0.07918	75996	0.01306	2.17532e-77
IRF6_MA1509.1	IRF6	MA1509.1	C_IRF6	13396	0.09604	5332	0.09565	5146	-0.00629	4.07407e-08
KLF10_MA1511.2	KLF10	MA1511.2	C_KLF4	231095	0.21097	130929	0.20921	127271	0.036	4.05888e-124
KLF11_MA1512.1	KLF11	MA1512.1	C_KLF9	179340	0.19886	94941	0.19703	91557	0.03909	2.31218e-120
KLF15_MA1513.1	KLF15	MA1513.1	C_PATZ1	164551	0.29975	113610	0.29786	112150	0.03344	6.60824e-119
KLF17_MA1514.1	KLF17	MA1514.1	C_KLF17	183720	0.1242	87923	0.12385	84631	0.0243	2.96699e-104
KLF2_MA1515.1	KLF2	MA1515.1	C_KLF9	173192	0.20977	95547	0.2076	92347	0.04602	2.96355e-129
KLF3_MA1516.1	KLF3	MA1516.1	C_KLF3	97950	0.23732	58079	0.23474	56426	0.05202	3.45507e-122
KLF6_MA1517.1	KLF6	MA1517.1	C_KLF9	135845	0.19939	72800	0.19697	70103	0.04811	6.04617e-125
Lhx1_MA1518.2	Lhx1	MA1518.2	C_Lhx1	24830	0.07386	7937	0.0766	8086	-0.08814	1.64044e-113
LHX5_MA1519.1	LHX5	MA1519.1	C_LHX5	39682	0.05697	10084	0.0597	10470	-0.09706	1.95736e-132
MAF_MA1520.1	MAF	MA1520.1	C_MAFA	56189	0.08902	23921	0.08913	23217	-0.00485	9.89746e-23
MAFA_MA1521.1	MAFA	MA1521.1	C_MAFA	58214	0.10203	26662	0.10186	25873	0.00398	3.75914e-16
MAZ_MA1522.1	MAZ	MA1522.1	C_PATZ1	231706	0.1881	129885	0.18779	126798	0.02006	2.52532e-95
MSANTD3_MA1523.1	MSANTD3	MA1523.1	C_MSANTD3	87917	0.08868	36920	0.08831	35331	0.01322	2.94414e-68
Msgn1_MA1524.2	Msgn1	MA1524.2	C_Msgn1	107178	0.07359	36790	0.07402	35119	-0.00468	8.5457e-26
NFATC4_MA1525.2	NFATC4	MA1525.2	C_Nfatc2	78089	0.06542	22306	0.06592	21626	-0.03334	5.82999e-99
NFIC_MA1527.1	NFIC	MA1527.1	C_NFIB	84759	0.11773	43384	0.11987	42399	-0.01042	2.70958e-51
NFIX_MA1528.1	NFIX	MA1528.1	C_NFIB	99730	0.12969	53903	0.13149	52733	0.00042	0.681252
NHLH2_MA1529.1	NHLH2	MA1529.1	C_NHLH2	98966	0.12756	51497	0.12879	50589	-0.00907	2.30795e-56
NKX6-3_MA1530.1	NKX6-3	MA1530.1	C_NKX6-3	51036	0.05889	13795	0.05981	13422	-0.04471	1.59159e-97
NR1D1_MA1531.1	NR1D1	MA1531.1	C_NR1D1	72368	0.09785	32766	0.09624	30957	0.03762	1.23856e-99
NR1D2_MA1532.2	NR1D2	MA1532.2	C_NR1D1	71645	0.08417	28889	0.08285	27047	0.03364	1.48908e-94
NR1I2_MA1533.1	NR1I2	MA1533.1	C_NR1I2	51419	0.10613	24319	0.10522	23300	0.02586	1.06065e-76
NR1I3_MA1534.1	NR1I3	MA1534.1	C_Vdr	60894	0.06226	18813	0.06226	17834	-0.01206	1.09707e-54
NR2C1_MA1535.1	NR2C1	MA1535.1	C_NR2C2	91279	0.09149	40822	0.08982	38352	0.04534	9.69681e-118
NR2C2_MA1536.1	NR2C2	MA1536.1	C_NR2C2	62621	0.08843	27016	0.08676	25390	0.0352	2.21919e-94
NR2F1_MA1537.1	NR2F1	MA1537.1	C_NR2C2	88748	0.08665	36747	0.08526	34002	0.03927	1.45961e-109
NR2F1_MA1538.1	NR2F1	MA1538.1	C_NR2F1	43219	0.09936	19394	0.09811	18483	0.03376	8.06545e-87
NR2F6_MA1539.1	NR2F6	MA1539.1	C_NR2F1	39067	0.09738	17635	0.09612	16883	0.03161	1.15699e-81
NR5A1_MA1540.2	NR5A1	MA1540.2	C_NR5A1	155207	0.07466	60467	0.07332	55245	0.05283	1.00065e-131
NR6A1_MA1541.1	NR6A1	MA1541.1	C_NR6A1	84490	0.07353	31536	0.07264	29243	0.02563	4.78392e-86
OSR1_MA1542.1	OSR1	MA1542.1	C_OSR1	57566	0.08864	23356	0.08896	22603	-0.00239	7.57444e-06
OVOL1_MA1544.1	OVOL1	MA1544.1	C_OVOL1	8393	0.09683	3189	0.09703	3056	-0.00713	1.43432e-08
OVOL2_MA1545.1	OVOL2	MA1545.1	C_OVOL1	7862	0.10669	3242	0.10558	3110	0.01267	1.77663e-14
PAX3_MA1546.1	PAX3	MA1546.1	C_PAX3	20771	0.09425	7696	0.09495	7485	-0.02855	2.89656e-60
PITX2_MA1547.2	PITX2	MA1547.2	C_OTX2	56079	0.06151	16718	0.06069	15204	0.03772	3.25595e-99
PLAGL2_MA1548.1	PLAGL2	MA1548.1	C_PLAGL2	57062	0.16466	33797	0.16316	32685	0.04693	2.44074e-108
POU6F1_MA1549.1	POU6F1	MA1549.1	C_POU6F2	55547	0.06398	16379	0.06456	15980	-0.03339	1.06006e-94
PPARD_MA1550.1	PPARD	MA1550.1	C_NR2C2	83013	0.07788	31611	0.07687	29192	0.0287	3.13574e-94
RARB_MA1552.1	RARB	MA1552.1	C_RXRG	34720	0.10685	14652	0.1056	13947	0.02396	3.3082e-66
RARG_MA1553.1	RARG	MA1553.1	C_RXRG	34030	0.09578	13581	0.09498	12948	0.0172	3.29914e-51
RFX7_MA1554.1	RFX7	MA1554.1	C_RFX7	43092	0.09357	16803	0.09499	16428	-0.03103	6.13992e-85
RXRB_MA1555.1	RXRB	MA1555.1	C_RXRG	36967	0.10838	16157	0.1069	15316	0.02879	8.44148e-79
RXRG_MA1556.1	RXRG	MA1556.1	C_RXRG	45709	0.11621	20630	0.11497	19586	0.02942	9.29187e-83
SMAD5_MA1557.1	SMAD5	MA1557.1	C_SMAD3	22757	0.09184	9490	0.09185	9107	0.01645	8.84788e-47
SNAI1_MA1558.1	SNAI1	MA1558.1	C_ASCL1	116244	0.07259	44126	0.07243	41186	0.02193	1.20578e-91
SNAI3_MA1559.1	SNAI3	MA1559.1	C_ASCL1	116371	0.07208	43917	0.07196	41246	0.01794	1.46847e-78
SOHLH2_MA1560.1	SOHLH2	MA1560.1	C_MYC	26374	0.16051	13115	0.16191	12777	0.0029	1.64355e-06
SOX12_MA1561.1	SOX12	MA1561.1	C_SOX12	35271	0.08269	12354	0.08275	11994	-0.02114	1.35425e-64
SOX14_MA1562.1	SOX14	MA1562.1	C_SOX14	38048	0.08583	13395	0.08514	13034	-0.02135	7.4598e-68
SOX18_MA1563.2	SOX18	MA1563.2	C_SOX18	44777	0.07509	14593	0.07426	14018	-0.02104	1.24236e-67
SP9_MA1564.1	SP9	MA1564.1	C_KLF9	188822	0.2285	106190	0.22669	103191	0.0365	1.82344e-121
TBX18_MA1565.1	TBX18	MA1565.1	C_TBX18	107977	0.07987	40677	0.07971	38590	0.0049	6.9724e-32
TBX3_MA1566.2	TBX3	MA1566.2	C_TBX18	67018	0.06848	23033	0.06829	21837	-0.00437	3.27698e-18
Tbx6_MA1567.2	Tbx6	MA1567.2	C_TBX18	105976	0.07493	39022	0.07471	37219	0.00129	5.2587e-05
TCF21_MA1568.1	TCF21	MA1568.1	C_ATOH7	47684	0.06949	15808	0.06904	14755	0.01947	5.41717e-70
TFAP2E_MA1569.1	TFAP2E	MA1569.1	C_TFAP2C	69192	0.17957	41773	0.17807	40651	0.04253	1.80078e-106
TFAP4_MA1570.1	TFAP4	MA1570.1	C_TFAP4	46394	0.05968	13374	0.05929	12192	0.02184	1.8081e-70
TGIF2LX_MA1571.1	TGIF2LX	MA1571.1	C_TGIF2LX	51114	0.08166	20035	0.08147	19273	-0.00556	1.70179e-22
TGIF2LY_MA1572.1	TGIF2LY	MA1572.1	C_TGIF2LX	47935	0.07923	18366	0.07917	17634	-0.00789	3.35705e-35
Thap11_MA1573.2	Thap11	MA1573.2	C_Thap11	89827	0.10767	34368	0.10581	32397	0.03393	5.75656e-101
THRB_MA1574.1	THRB	MA1574.1	C_NR2C2	85787	0.09253	36283	0.09107	33722	0.04031	4.35645e-107
THRB_MA1575.1	THRB	MA1575.1	C_THRB	42936	0.11382	20835	0.11243	19861	0.03775	2.43816e-90
THRB_MA1576.1	THRB	MA1576.1	C_THRB	93506	0.08717	38954	0.08652	36342	0.02816	5.74505e-94
TLX2_MA1577.1	TLX2	MA1577.1	C_TLX2	25127	0.07846	7836	0.07996	7881	-0.0549	2.23836e-98
VEZF1_MA1578.1	VEZF1	MA1578.1	C_ZNF740	91745	0.11999	42750	0.12051	41300	0.01127	3.65978e-59
ZBTB26_MA1579.1	ZBTB26	MA1579.1	C_ZBTB26	140403	0.08077	53839	0.08064	51361	0.00781	2.63615e-49
ZBTB32_MA1580.1	ZBTB32	MA1580.1	C_ZBTB32	62621	0.06209	20188	0.06259	19144	-0.01798	3.91811e-66
ZBTB6_MA1581.1	ZBTB6	MA1581.1	C_ZBTB6	120712	0.11658	59338	0.11614	56754	0.02838	9.02489e-102
ZFP57_MA1583.1	ZFP57	MA1583.1	C_ZFP57	19795	0.21503	12545	0.21523	12426	-0.00265	3.31796e-06
ZIC5_MA1584.1	ZIC5	MA1584.1	C_ZIC5	101963	0.18124	61195	0.18077	60078	0.02156	5.97832e-87
ZKSCAN1_MA1585.1	ZKSCAN1	MA1585.1	C_ZKSCAN1	50080	0.08587	19662	0.08556	18664	0.00761	1.837e-31
ZNF135_MA1587.1	ZNF135	MA1587.1	C_ZNF135	138398	0.10947	62416	0.1081	58523	0.05395	1.87441e-129
ZNF136_MA1588.1	ZNF136	MA1588.1	C_ZNF136	71739	0.06763	23023	0.06776	21836	-0.01529	3.97766e-59
ZNF140_MA1589.1	ZNF140	MA1589.1	C_ZNF140	78908	0.09318	32037	0.09333	31045	-0.00622	1.61711e-29
ZNF274_MA1592.1	ZNF274	MA1592.1	C_ZNF274	79310	0.07841	29665	0.07849	28408	-0.00925	3.87301e-48
ZNF317_MA1593.1	ZNF317	MA1593.1	C_ZNF317	138140	0.07969	54595	0.07997	53003	-0.01625	1.83885e-85
ZNF382_MA1594.1	ZNF382	MA1594.1	C_ZNF382	70250	0.0783	25891	0.078	24590	0.00593	1.55245e-29
ZNF460_MA1596.1	ZNF460	MA1596.1	C_ZNF460	269070	0.16223	147198	0.16123	141963	0.04231	7.70453e-134
ZNF528_MA1597.1	ZNF528	MA1597.1	C_ZNF528	129954	0.08993	53833	0.08989	51395	0.00641	1.19794e-40
ZNF682_MA1599.1	ZNF682	MA1599.1	C_ZNF682	124919	0.17305	69395	0.17132	66902	0.04147	4.07403e-118
ZNF684_MA1600.1	ZNF684	MA1600.1	C_ZNF684	114402	0.10446	51122	0.10372	48573	0.02557	6.80654e-95
ZNF75D_MA1601.2	ZNF75D	MA1601.2	C_ZNF75D	111434	0.08504	44304	0.08486	42116	0.00643	3.16557e-43
ZSCAN29_MA1602.1	ZSCAN29	MA1602.1	C_ZSCAN29	45408	0.08734	18925	0.08623	17620	0.03916	1.91264e-95
Dmrt1_MA1603.1	Dmrt1	MA1603.1	C_Dmrt1	70733	0.05951	20677	0.05955	19226	-0.00979	4.11251e-46
Ebf2_MA1604.1	Ebf2	MA1604.1	C_EBF1	124706	0.10275	57811	0.10223	55163	0.02507	8.48619e-100
Foxf1_MA1606.1	Foxf1	MA1606.1	C_FOXN3	83527	0.06281	23783	0.06292	22731	-0.01713	8.88792e-75
Foxl2_MA1607.1	Foxl2	MA1607.1	C_FOXN3	92410	0.05652	23582	0.05677	22334	-0.02179	1.60945e-81
Isl1_MA1608.1	Isl1	MA1608.1	C_Isl1	41087	0.07084	13677	0.07121	13103	-0.02093	2.34433e-63
Plagl1_MA1615.1	Plagl1	MA1615.1	C_Plagl1	160460	0.14413	88557	0.14246	84697	0.05198	7.30395e-138
Prdm15_MA1616.1	Prdm15	MA1616.1	C_Prdm15	117157	0.08339	44744	0.08327	42645	0.00128	6.1867e-05
Ptf1a_MA1618.1	Ptf1a	MA1618.1	C_Neurod2	134246	0.07427	50710	0.07515	48876	-0.01786	6.22063e-82
Ptf1A_MA1619.1	Ptf1A	MA1619.1	C_Tcf12	105761	0.10674	51171	0.10898	50450	-0.02868	7.48206e-98
Ptf1A_MA1620.1	Ptf1A	MA1620.1	C_Rbpjl	115189	0.07428	44917	0.07444	41955	0.0165	5.21741e-74
Rbpjl_MA1621.1	Rbpjl	MA1621.1	C_Rbpjl	125659	0.07613	49808	0.07616	46450	0.02141	4.73727e-87
Stat2_MA1623.1	Stat2	MA1623.1	C_Stat2	252407	0.05749	65356	0.05793	62462	-0.02393	4.7433e-106
Stat5a_MA1624.1	Stat5a	MA1624.1	C_Stat5a	105403	0.07357	35516	0.07387	33766	-0.00878	4.22615e-52
Stat5b_MA1625.1	Stat5b	MA1625.1	C_Stat5b	135389	0.07983	48401	0.07988	45783	-0.00113	0.00498024
Wt1_MA1627.1	Wt1	MA1627.1	C_Wt1	272137	0.14607	137116	0.14585	132588	0.01674	1.18051e-96
Zic1Zic2_MA1628.1	Zic1::Zic2	MA1628.1	C_Zic2	144595	0.12798	75073	0.12765	72784	0.01413	3.50903e-77
Zic2_MA1629.1	Zic2	MA1629.1	C_Zic2	209290	0.10784	101369	0.10768	98100	0.0093	6.2932e-69
ZNF281_MA1630.2	ZNF281	MA1630.2	C_PATZ1	350432	0.15665	180546	0.15591	174439	0.02668	6.58571e-122
ASCL1_MA1631.1	ASCL1	MA1631.1	C_ASCL1	168154	0.10643	77843	0.10696	74793	0.01078	3.34004e-65
ATF2_MA1632.1	ATF2	MA1632.1	C_FOSL1::JUN	62780	0.09467	23906	0.0936	22965	0.00488	1.69673e-23
BACH1_MA1633.2	BACH1	MA1633.2	C_FOSL1::JUN	75712	0.06837	24253	0.06987	24877	-0.07517	1.43265e-131
BATF_MA1634.1	BATF	MA1634.1	C_FOSL1::JUN	82697	0.06885	27650	0.0702	28236	-0.06682	2.4468e-127
BHLHE22_MA1635.1	BHLHE22	MA1635.1	C_Tcf12	114178	0.11109	56667	0.11368	56139	-0.03265	3.51896e-105
CEBPG_MA1636.1	CEBPG	MA1636.1	C_CEBPG	53266	0.06083	14649	0.06126	13914	-0.03263	1.95283e-87
EBF3_MA1637.1	EBF3	MA1637.1	C_EBF1	121264	0.10642	57315	0.10588	54784	0.02541	2.00804e-96
HAND2_MA1638.1	HAND2	MA1638.1	C_Neurod2	138271	0.07715	53271	0.0778	51349	-0.01263	9.40416e-71
MEIS1_MA1639.1	MEIS1	MA1639.1	C_MEIS2	53993	0.0573	13671	0.05822	12860	-0.03389	5.98138e-91
MEIS2_MA1640.1	MEIS2	MA1640.1	C_MEIS2	63308	0.05066	13289	0.05145	12353	-0.02602	4.71352e-82
MYF5_MA1641.1	MYF5	MA1641.1	C_Tcf12	105456	0.10642	51075	0.10869	50371	-0.02999	4.82033e-100
NEUROG2_MA1642.1	NEUROG2	MA1642.1	C_Neurod2	135610	0.07725	52184	0.07787	49979	-0.00836	1.5821e-52
NFIB_MA1643.1	NFIB	MA1643.1	C_NFIB	128520	0.12161	67658	0.12286	65616	0.00489	2.61969e-35
NFYC_MA1644.1	NFYC	MA1644.1	C_NFYA	56043	0.1798	22864	0.17992	21924	-0.00518	3.48171e-23
NKX2-2_MA1645.1	NKX2-2	MA1645.1	C_NKX2-2	94608	0.08523	38207	0.08487	36391	0.0088	1.07605e-47
OSR2_MA1646.1	OSR2	MA1646.1	C_OSR2	159759	0.08845	65737	0.08862	63291	-0.00557	1.70374e-46
Prdm4_MA1647.2	Prdm4	MA1647.2	C_Prdm4	87400	0.08188	32910	0.08212	31353	0.00248	3.11637e-12
TCF12_MA1648.1	TCF12	MA1648.1	C_ASCL1	130848	0.13332	64788	0.13369	62417	0.01893	1.82715e-84
ZBTB12_MA1649.1	ZBTB12	MA1649.1	C_ZBTB12	104225	0.07678	39538	0.07612	36428	0.03275	1.35178e-104
ZBTB14_MA1650.1	ZBTB14	MA1650.1	C_ZBTB14	70301	0.29244	51162	0.29266	50979	0.00862	9.88476e-45
ZFP42_MA1651.1	ZFP42	MA1651.1	C_ZFP42	99062	0.10611	40201	0.10628	38590	-0.00112	0.0250437
ZKSCAN5_MA1652.1	ZKSCAN5	MA1652.1	C_ZKSCAN5	208354	0.10266	91029	0.1021	86985	0.01428	2.20254e-82
ZNF148_MA1653.1	ZNF148	MA1653.1	C_PATZ1	309773	0.17992	171271	0.17943	166876	0.02129	1.8849e-111
ZNF16_MA1654.1	ZNF16	MA1654.1	C_ZNF16	148993	0.10169	66934	0.10115	63487	0.0224	3.6416e-97
ZNF341_MA1655.1	ZNF341	MA1655.1	C_ZNF341	116854	0.1016	52315	0.10218	50877	-0.00206	1.23714e-07
ZNF449_MA1656.1	ZNF449	MA1656.1	C_ZNF449	126114	0.13018	62454	0.12889	59562	0.04458	1.2456e-118
ZNF652_MA1657.1	ZNF652	MA1657.1	C_ZNF652	61502	0.06196	17520	0.06235	16569	-0.02019	2.88686e-71
FOXA3_MA1683.1	FOXA3	MA1683.1	C_FOXN3	70370	0.0644	20475	0.06467	19634	-0.02387	1.84403e-82
Foxn1_MA1684.1	Foxn1	MA1684.1	C_Foxn1	35748	0.2214	23468	0.22108	23327	0.01332	7.14287e-46
DMRTA1_MA1707.1	DMRTA1	MA1707.1	C_DMRTA1	52417	0.05336	12560	0.05397	12170	-0.04096	1.45198e-103
ETV7_MA1708.1	ETV7	MA1708.1	C_Spi1	81235	0.14525	38797	0.14324	37232	0.03678	1.84344e-100
ZIM3_MA1709.1	ZIM3	MA1709.1	C_ZIM3	180855	0.06209	52055	0.0625	49730	-0.0183	9.41006e-89
ZNF257_MA1710.1	ZNF257	MA1710.1	C_ZNF257	252737	0.11083	114185	0.11016	108660	0.02596	1.19985e-111
ZNF343_MA1711.1	ZNF343	MA1711.1	C_ZNF343	79347	0.15129	42516	0.15087	41519	0.01227	7.58549e-58
ZNF454_MA1712.1	ZNF454	MA1712.1	C_ZNF454	172988	0.18213	107804	0.18041	104957	0.04666	1.16195e-135
ZNF610_MA1713.1	ZNF610	MA1713.1	C_ZNF610	132823	0.27512	96029	0.27458	95340	0.01925	1.95178e-84
ZNF675_MA1714.1	ZNF675	MA1714.1	C_ZNF675	110826	0.08439	42002	0.08447	40598	-0.00771	1.40838e-48
ZNF707_MA1715.1	ZNF707	MA1715.1	C_ZNF707	138703	0.10848	63114	0.10741	60083	0.03534	1.84664e-111
ZNF76_MA1716.1	ZNF76	MA1716.1	C_ZNF76	112422	0.12853	52145	0.12716	49731	0.02854	1.44535e-101
ZNF784_MA1717.1	ZNF784	MA1717.1	C_ZNF784	33932	0.08135	13022	0.0808	12181	0.02089	8.23626e-67
ZNF8_MA1718.1	ZNF8	MA1718.1	C_ZNF8	58712	0.05463	15778	0.05474	14471	-0.00727	1.44769e-34
ZNF816_MA1719.1	ZNF816	MA1719.1	C_ZNF816	145259	0.11776	71191	0.11741	68334	0.02417	9.4297e-94
ZNF85_MA1720.1	ZNF85	MA1720.1	C_ZNF85	70495	0.07266	24776	0.07331	23661	-0.01802	3.42398e-68
ZNF93_MA1721.1	ZNF93	MA1721.1	C_ZNF93	127594	0.20708	81954	0.2074	81408	0.00023	0.256018
ZSCAN31_MA1722.1	ZSCAN31	MA1722.1	C_ZSCAN31	64879	0.09629	27504	0.09627	26649	-0.00064	0.133881
PRDM9_MA1723.1	PRDM9	MA1723.1	C_PRDM9	379763	0.12345	181335	0.12313	174857	0.01727	1.22397e-99
Rfx6_MA1724.1	Rfx6	MA1724.1	C_Rfx6	104154	0.08977	40522	0.08995	38664	0.01155	4.93105e-60
ZNF189_MA1725.1	ZNF189	MA1725.1	C_ZNF189	153484	0.09077	63732	0.09125	61344	-0.00042	0.810724
ZNF331_MA1726.1	ZNF331	MA1726.1	C_ZNF331	181194	0.10957	87226	0.10938	84146	0.01615	6.41924e-91
ZNF417_MA1727.1	ZNF417	MA1727.1	C_ZNF417	49708	0.16781	28625	0.1674	27833	0.02458	5.71595e-74
ZNF549_MA1728.1	ZNF549	MA1728.1	C_ZNF549	178641	0.11793	89511	0.11736	86413	0.02456	3.0198e-103
ZNF680_MA1729.1	ZNF680	MA1729.1	C_ZNF680	123968	0.06538	37058	0.06591	35534	-0.02244	1.35584e-94
ZNF708_MA1730.1	ZNF708	MA1730.1	C_ZNF708	141733	0.11244	68522	0.11223	66025	0.01369	5.22155e-71
ZNF768_MA1731.1	ZNF768	MA1731.1	C_ZNF768	217658	0.10171	97801	0.10167	94438	0.00385	1.74797e-31
BNC2_MA1928.1	BNC2	MA1928.1	C_FOSL1::JUN	78774	0.07053	27182	0.07185	27773	-0.06425	7.82295e-126
CTCF_MA1929.1	CTCF	MA1929.1	C_CTCF	194307	0.15797	111730	0.15623	108414	0.04248	1.83652e-129
CTCF_MA1930.1	CTCF	MA1930.1	C_CTCF	168154	0.15592	97622	0.15434	94556	0.03908	7.54034e-122
ELK1HOXA1_MA1931.1	ELK1::HOXA1	MA1931.1	C_ELK1::HOXA1	39093	0.15436	17363	0.15368	16742	0.01104	2.585e-39
ELK1HOXB13_MA1932.1	ELK1::HOXB13	MA1932.1	C_ELK1::HOXB13	30407	0.13155	12603	0.13113	12124	0.00654	7.08255e-18
ELK1SREBF2_MA1933.1	ELK1::SREBF2	MA1933.1	C_ELK1::SREBF2	36733	0.17808	18635	0.17723	17906	0.03198	1.60323e-84
ERFFIGLA_MA1934.1	ERF::FIGLA	MA1934.1	C_ETV5::FIGLA	94511	0.10893	43567	0.10894	42177	0.00636	5.2614e-34
ERFFOXI1_MA1935.1	ERF::FOXI1	MA1935.1	C_ERF::FOXI1	108810	0.09996	45144	0.09833	42857	0.02625	1.20326e-95
ERFFOXO1_MA1936.1	ERF::FOXO1	MA1936.1	C_ERF::FOXO1	120190	0.08673	46875	0.08602	44631	0.00865	9.63946e-53
ERFHOXB13_MA1937.1	ERF::HOXB13	MA1937.1	C_ERF::HOXB13	40877	0.08197	13888	0.08205	13322	-0.01495	3.29121e-49
ERFNHLH1_MA1938.1	ERF::NHLH1	MA1938.1	C_ERF::NHLH1	98655	0.12372	48087	0.12419	46986	-0.00418	5.66956e-25
ERFSREBF2_MA1939.1	ERF::SREBF2	MA1939.1	C_ERF::SREBF2	36071	0.10597	14636	0.10636	14092	-0.00252	7.9852e-05
ETV2DRGX_MA1940.1	ETV2::DRGX	MA1940.1	C_ETV5::DRGX	39006	0.08074	12915	0.08162	12544	-0.03348	1.22433e-89
ETV2FIGLA_MA1941.1	ETV2::FIGLA	MA1941.1	C_ETV5::FIGLA	112706	0.11666	53146	0.11668	51231	0.00907	1.88602e-49
ETV2FOXI1_MA1942.1	ETV2::FOXI1	MA1942.1	C_ERF::FOXI1	120276	0.0951	50191	0.09378	47605	0.02328	5.82197e-95
ETV2HOXB13_MA1943.1	ETV2::HOXB13	MA1943.1	C_ETV2::HOXB13	30381	0.0758	9634	0.07637	9104	-0.01916	1.18729e-53
ETV5DRGX_MA1944.1	ETV5::DRGX	MA1944.1	C_ETV5::DRGX	58035	0.09167	21641	0.09169	20982	-0.01852	5.02919e-68
ETV5FIGLA_MA1945.1	ETV5::FIGLA	MA1945.1	C_ETV5::FIGLA	142312	0.10899	65633	0.10895	62940	0.01536	3.46406e-78
ETV5FOXI1_MA1946.1	ETV5::FOXI1	MA1946.1	C_ERF::FOXI1	96353	0.0908	39113	0.09003	37193	0.00987	6.55901e-52
ETV5FOXO1_MA1947.1	ETV5::FOXO1	MA1947.1	C_ETV5::FOXO1	108264	0.08177	41896	0.08132	39790	0.00796	8.83574e-48
ETV5HOXA2_MA1948.1	ETV5::HOXA2	MA1948.1	C_ETV5::HOXA2	38752	0.09056	14469	0.09098	14106	-0.02875	1.01775e-79
FLI1DRGX_MA1949.1	FLI1::DRGX	MA1949.1	C_ETV5::DRGX	40945	0.09432	15197	0.09433	14608	-0.01674	8.73733e-54
FLI1FOXI1_MA1950.1	FLI1::FOXI1	MA1950.1	C_ERF::FOXI1	118559	0.08337	45562	0.08243	43170	0.01494	5.94862e-69
FOS_MA1951.1	FOS	MA1951.1	C_FOSL1::JUN	26519	0.13579	11414	0.13539	11082	-0.00016	0.582839
FOXJ2ELF1_MA1952.1	FOXJ2::ELF1	MA1952.1	C_FOXJ2::ELF1	117893	0.08351	41747	0.08248	39242	0.01538	9.91863e-69
FOXO1ELF1_MA1953.1	FOXO1::ELF1	MA1953.1	C_ERF::FOXI1	126578	0.07744	46270	0.07692	43990	-0.00101	5.03997e-05
FOXO1ELK1_MA1954.1	FOXO1::ELK1	MA1954.1	C_ERF::FOXI1	129270	0.08375	49269	0.08292	46829	0.00961	3.33744e-57
FOXO1ELK3_MA1955.1	FOXO1::ELK3	MA1955.1	C_ERF::FOXI1	97372	0.08295	36100	0.08244	34355	0.00386	1.12348e-25
FOXO1FLI1_MA1956.1	FOXO1::FLI1	MA1956.1	C_ERF::FOXI1	109736	0.07621	38260	0.07568	36347	0.00016	0.606684
HOXB2ELK1_MA1957.1	HOXB2::ELK1	MA1957.1	C_HOXB2::ELK1	37747	0.13146	16074	0.13101	15537	-0.00378	7.92914e-09
HOXD12ELK1_MA1958.1	HOXD12::ELK1	MA1958.1	C_HOXD12::ELK1	42087	0.07864	13667	0.07869	13010	-0.01468	2.40816e-49
KLF7_MA1959.1	KLF7	MA1959.1	C_KLF4	217391	0.19733	120642	0.1956	116705	0.04113	3.53003e-131
MGAEVX1_MA1960.1	MGA::EVX1	MA1960.1	C_MGA::EVX1	56983	0.06185	16484	0.06314	16165	-0.04695	1.3749e-101
PATZ1_MA1961.1	PATZ1	MA1961.1	C_PATZ1	295834	0.21077	176389	0.21007	172645	0.02503	4.42883e-110
POU2F1SOX2_MA1962.1	POU2F1::SOX2	MA1962.1	C_POU2F1::SOX2	82473	0.05256	17726	0.05362	16980	-0.04487	1.98563e-110
SATB1_MA1963.1	SATB1	MA1963.1	C_SATB1	42705	0.05345	9408	0.05491	9010	-0.04662	3.35945e-96
SMAD2_MA1964.1	SMAD2	MA1964.1	C_SMAD2	105985	0.10078	48925	0.10034	46543	0.03047	8.9387e-100
SP5_MA1965.1	SP5	MA1965.1	C_SP5	266246	0.13334	132730	0.13327	128193	0.01578	2.0974e-96
TFAP4ETV1_MA1966.1	TFAP4::ETV1	MA1966.1	C_ETV5::FIGLA	123111	0.1317	61161	0.13147	59288	0.01376	6.48152e-64
TFAP4FLI1_MA1967.1	TFAP4::FLI1	MA1967.1	C_TFAP4::FLI1	115127	0.10206	52310	0.10339	51300	-0.02207	5.24777e-88
TFCP2_MA1968.1	TFCP2	MA1968.1	C_TFCP2	19955	0.08438	7284	0.08446	6944	0.00174	0.0105818
THRA_MA1969.1	THRA	MA1969.1	C_THRA	130302	0.09912	59862	0.09845	56615	0.02776	7.08918e-103
TRPS1_MA1970.1	TRPS1	MA1970.1	C_Gata3	60988	0.05495	16147	0.05514	15128	-0.02234	3.76434e-74
ZBED2_MA1971.1	ZBED2	MA1971.1	C_ZBED2	17552	0.1452	8689	0.14542	8443	0.00983	1.79954e-23
ZFP14_MA1972.1	ZFP14	MA1972.1	C_ZFP14	237644	0.11401	109346	0.11326	104309	0.02666	5.05294e-116
ZKSCAN3_MA1973.1	ZKSCAN3	MA1973.1	C_ZKSCAN3	138518	0.11667	68023	0.11467	63628	0.0655	1.76124e-142
ZNF211_MA1974.1	ZNF211	MA1974.1	C_ZNF211	51041	0.04992	12068	0.04983	10950	3e-05	0.591478
ZNF214_MA1975.1	ZNF214	MA1975.1	C_ZNF214	63425	0.07302	22106	0.07289	21215	-0.00654	1.59187e-29
ZNF320_MA1976.1	ZNF320	MA1976.1	C_ZNF320	261003	0.15324	144665	0.15197	139203	0.04192	3.424e-134
ZNF324_MA1977.1	ZNF324	MA1977.1	C_ZNF324	126790	0.08549	50758	0.08515	47883	0.01774	8.0635e-81
ZNF354A_MA1978.1	ZNF354A	MA1978.1	C_ZNF354A	128341	0.04529	22787	0.04598	21429	-0.03855	2.38208e-115
ZNF416_MA1979.1	ZNF416	MA1979.1	C_ZNF416	130589	0.10053	59828	0.10007	56890	0.02546	1.46061e-96
ZNF418_MA1980.1	ZNF418	MA1980.1	C_ZNF418	141285	0.07555	50773	0.07546	48478	-0.00161	2.73504e-10
ZNF530_MA1981.1	ZNF530	MA1981.1	C_ZNF530	298049	0.14337	154656	0.14243	149135	0.02998	4.32092e-127
ZNF574_MA1982.1	ZNF574	MA1982.1	C_ZNF574	108943	0.14705	58340	0.14592	56082	0.03689	2.37902e-107
ZNF582_MA1983.1	ZNF582	MA1983.1	C_ZNF582	87278	0.07658	31393	0.07744	30138	-0.02068	5.19137e-81
ZNF667_MA1984.1	ZNF667	MA1984.1	C_ZNF667	95772	0.07737	35898	0.07731	34218	0.00338	1.48998e-17
ZNF669_MA1985.1	ZNF669	MA1985.1	C_ZNF669	43276	0.1596	24326	0.15811	23633	0.03357	1.7037e-88
ZNF692_MA1986.1	ZNF692	MA1986.1	C_ZNF692	106479	0.13307	56214	0.13098	53625	0.05607	1.66973e-124
ZNF701_MA1987.1	ZNF701	MA1987.1	C_ZNF701	283399	0.12043	133307	0.12046	128469	0.01049	6.52793e-77
Atf3_MA1988.1	Atf3	MA1988.1	C_FOSL1::JUN	83971	0.06974	28571	0.07103	29187	-0.06639	4.68443e-126
Bcl11B_MA1989.1	Bcl11B	MA1989.1	C_Bcl11B	126499	0.06738	40640	0.06716	38339	0.00906	5.70813e-57
Gli1_MA1990.1	Gli1	MA1990.1	C_Gli2	127032	0.10458	58819	0.10378	55767	0.0368	1.34388e-115
Hnf1A_MA1991.1	Hnf1A	MA1991.1	C_Lef1	102625	0.07432	36222	0.07433	34387	-0.01071	1.51005e-59
Ikzf3_MA1992.1	Ikzf3	MA1992.1	C_Erg	208038	0.10901	95481	0.1075	90749	0.03737	4.49931e-124
Neurod2_MA1993.1	Neurod2	MA1993.1	C_Tcf12	110845	0.11015	54580	0.11281	54084	-0.03302	6.2898e-102
Nkx2-1_MA1994.1	Nkx2-1	MA1994.1	C_Nkx2-1	66288	0.06743	21881	0.06782	21047	-0.02113	8.7845e-73
Npas4_MA1995.1	Npas4	MA1995.1	C_Npas4	25115	0.12819	11923	0.12954	11685	-0.01461	7.97954e-40
Nr1H2_MA1996.1	Nr1H2	MA1996.1	C_Nr1H2	100311	0.08078	41561	0.07952	38868	0.03446	8.72172e-102
Olig2_MA1997.1	Olig2	MA1997.1	C_Tcf12	114668	0.10995	56442	0.11257	55937	-0.03287	1.98727e-105
Prdm14_MA1998.1	Prdm14	MA1998.1	C_Prdm14	66419	0.08362	26899	0.08276	25321	0.02093	9.03951e-77
Prdm5_MA1999.1	Prdm5	MA1999.1	C_Prdm5	157238	0.09097	65517	0.09109	62968	0.00487	6.8372e-31
Six4_MA2001.1	Six4	MA2001.1	C_SIX1	69755	0.06836	22836	0.06849	21435	-0.01061	1.55201e-50
Zfp335_MA2002.1	Zfp335	MA2002.1	C_Zfp335	151540	0.09311	66037	0.09298	63509	0.01115	1.48917e-59
NKX2-4_MA2003.1	NKX2-4	MA2003.1	C_NKX2-3	78684	0.08112	30095	0.0812	28868	-0.00739	5.38937e-36

## Sheet: 8wstr neun neg
output_prefix	name	motif_id	cluster	total_tfbs	WT.STR.8W.Neg_footprints_mean_score	WT.STR.8W.Neg_footprints_bound	HD.STR.8W.Neg_footprints_mean_score	HD.STR.8W.Neg_footprints_bound	WT.STR.8W.Neg_footprints_HD.STR.8W.Neg_footprints_change	WT.STR.8W.Neg_footprints_HD.STR.8W.Neg_footprints_pvalue
Runx1_MA0002.2	Runx1	MA0002.2	C_Bcl11B	146497	0.08565	64009	0.08683	64028	-0.00095	0.00762761
TFAP2A_MA0003.4	TFAP2A	MA0003.4	C_TFAP2C	140246	0.11134	73478	0.10615	70529	0.11361	8.70927e-166
Arnt_MA0004.1	Arnt	MA0004.1	C_MYC	45263	0.11025	22044	0.10642	21547	0.07145	1.65455e-122
AhrArnt_MA0006.1	Ahr::Arnt	MA0006.1	C_Ahr::Arnt	61000	0.09526	28769	0.09155	27882	0.09233	2.25646e-138
Ar_MA0007.3	Ar	MA0007.3	C_Ar	49035	0.08893	21658	0.10285	22588	-0.1394	9.03336e-151
TBXT_MA0009.2	TBXT	MA0009.2	C_TBXT	39454	0.06027	14315	0.05993	14168	0.02865	2.92878e-75
PAX5_MA0014.3	PAX5	MA0014.3	C_PAX5	39294	0.14392	21637	0.13273	20705	0.15275	1.1895e-144
NR2F1_MA0017.2	NR2F1	MA0017.2	C_NR2F1	91608	0.08359	41884	0.08123	41112	0.05714	1.45575e-126
CREB1_MA0018.4	CREB1	MA0018.4	C_FOSL1::JUN	78091	0.09036	31341	0.08811	31157	0.03437	5.08773e-98
Ddit3Cebpa_MA0019.1	Ddit3::Cebpa	MA0019.1	C_Ddit3::Cebpa	42402	0.07222	15809	0.07248	16071	-0.00226	5.67554e-06
E2F1_MA0024.3	E2F1	MA0024.3	C_ZNF417	9513	0.17231	5691	0.16451	5499	0.12507	1.4169e-111
NFIL3_MA0025.2	NFIL3	MA0025.2	C_NFIL3	56018	0.05176	13818	0.05336	14365	-0.02822	3.32709e-78
EN1_MA0027.2	EN1	MA0027.2	C_ESX1	31891	0.07647	10846	0.07907	11205	-0.05069	4.792e-96
ELK1_MA0028.2	ELK1	MA0028.2	C_ETS1	28121	0.21307	16482	0.19583	16226	0.13714	3.21288e-139
Mecom_MA0029.1	Mecom	MA0029.1	C_Mecom	69292	0.05168	19217	0.05351	19892	-0.04202	7.17211e-103
FOXF2_MA0030.1	FOXF2	MA0030.1	C_FOXF2	63424	0.0579	18849	0.06118	19641	-0.06156	3.70303e-119
FOXD1_MA0031.1	FOXD1	MA0031.1	C_FOXN3	65021	0.06754	22186	0.071	23140	-0.05765	9.59126e-120
FOXC1_MA0032.2	FOXC1	MA0032.2	C_FOXC2	106773	0.04199	23134	0.04356	24138	-0.04512	1.72747e-120
FOXL1_MA0033.2	FOXL1	MA0033.2	C_FOXN3	48756	0.07014	16883	0.07435	17719	-0.07118	5.85901e-123
GATA1_MA0035.4	GATA1	MA0035.4	C_GATA1	44376	0.05296	12918	0.05402	13295	-0.02859	2.2333e-84
GATA2_MA0036.3	GATA2	MA0036.3	C_Gata3	51691	0.0534	15748	0.05433	16188	-0.02479	5.20999e-77
Gata3_MA0037.4	Gata3	MA0037.4	C_Gata3	59164	0.05131	17123	0.05252	17711	-0.03183	2.21047e-89
GFI1_MA0038.2	GFI1	MA0038.2	C_Gfi1B	76361	0.07375	26163	0.07532	26911	-0.03233	1.15553e-100
KLF4_MA0039.4	KLF4	MA0039.4	C_KLF4	287688	0.13621	158368	0.12535	150357	0.1759	1.99627e-194
Foxq1_MA0040.1	Foxq1	MA0040.1	C_Foxq1	74161	0.05081	19045	0.05385	20101	-0.06972	3.40215e-133
FOXD3_MA0041.2	FOXD3	MA0041.2	C_FOXD3	160701	0.04545	37703	0.04745	39057	-0.05773	5.94508e-139
FOXI1_MA0042.2	FOXI1	MA0042.2	C_FOXN3	80421	0.07142	28561	0.07473	29743	-0.05243	7.61003e-116
HLF_MA0043.3	HLF	MA0043.3	C_NFIL3	49820	0.05576	13416	0.05741	13923	-0.0246	9.07554e-73
HNF1A_MA0046.2	HNF1A	MA0046.2	C_HNF1A	49946	0.03912	10111	0.04023	10562	-0.04304	3.74487e-98
FOXA2_MA0047.3	FOXA2	MA0047.3	C_FOXN3	80339	0.05787	24031	0.06076	25129	-0.05375	2.2793e-122
NHLH1_MA0048.2	NHLH1	MA0048.2	C_Tcf12	109209	0.1064	54149	0.11006	53689	0.01208	3.34145e-69
Irf1_MA0050.3	Irf1	MA0050.3	C_Irf1	169670	0.05493	48099	0.05763	50749	-0.06456	5.27791e-144
IRF2_MA0051.1	IRF2	MA0051.1	C_IRF2	76985	0.06153	23692	0.06413	24686	-0.05622	5.7858e-121
MEF2A_MA0052.4	MEF2A	MA0052.4	C_MEF2A	142308	0.04063	28497	0.04184	29527	-0.03376	1.39577e-113
MZF1_MA0056.2	MZF1	MA0056.2	C_MZF1	83707	0.08216	36331	0.08151	35952	0.03864	2.76508e-106
MAX_MA0058.3	MAX	MA0058.3	C_MYC	33449	0.11313	16666	0.10925	16250	0.07805	5.43949e-111
MAXMYC_MA0059.1	MAX::MYC	MA0059.1	C_MAX::MYC	54218	0.09132	23875	0.08946	23715	0.03762	2.51628e-94
NFYA_MA0060.3	NFYA	MA0060.3	C_NFYA	51998	0.18117	23088	0.17491	23147	0.02928	5.40571e-83
GABPA_MA0062.3	GABPA	MA0062.3	C_Erg	184318	0.09592	83901	0.09495	84007	0.01761	3.23918e-98
NKX2-5_MA0063.2	NKX2-5	MA0063.2	C_NKX2-5	64592	0.06443	22854	0.06517	23141	-0.00744	9.51857e-34
PpargRxra_MA0065.2	Pparg::Rxra	MA0065.2	C_Pparg::Rxra	176243	0.09716	84877	0.09549	83018	0.05995	5.06734e-136
PPARG_MA0066.1	PPARG	MA0066.1	C_PPARG	73938	0.0848	33381	0.08411	32800	0.05015	3.80546e-120
PAX2_MA0067.2	PAX2	MA0067.2	C_PAX9	23510	0.11917	12002	0.11198	11685	0.10884	4.51974e-121
PAX4_MA0068.2	PAX4	MA0068.2	C_PAX4	20172	0.05844	5728	0.06081	5952	-0.06136	6.06312e-97
PAX6_MA0069.1	PAX6	MA0069.1	C_PAX6	35541	0.06642	12185	0.06776	12500	-0.01733	3.77186e-54
PBX1_MA0070.1	PBX1	MA0070.1	C_PBX1	44944	0.06079	12714	0.06183	13118	-0.02585	1.39474e-77
RORA_MA0071.1	RORA	MA0071.1	C_RORA	74157	0.06934	29455	0.06938	29468	0.01222	1.26954e-61
RORA_MA0072.1	RORA	MA0072.1	C_RORA	58594	0.06672	20872	0.06755	21154	-0.01017	2.8842e-45
RREB1_MA0073.1	RREB1	MA0073.1	C_RREB1	252245	0.085	108735	0.08164	104758	0.082	2.52479e-162
RXRAVDR_MA0074.1	RXRA::VDR	MA0074.1	C_RXRA::VDR	46050	0.075	18813	0.07519	18839	0.0184	3.69723e-60
PRRX2_MA0075.3	PRRX2	MA0075.3	C_PAX4	39571	0.05402	10685	0.0566	11224	-0.05856	2.69354e-109
ELK4_MA0076.2	ELK4	MA0076.2	C_ETS1	78111	0.15014	42091	0.14154	41459	0.08592	9.82332e-137
SOX9_MA0077.1	SOX9	MA0077.1	C_Sox17	52436	0.09918	19945	0.10564	20792	-0.07254	3.02383e-118
Sox17_MA0078.2	Sox17	MA0078.2	C_Sox17	90122	0.10235	35754	0.10928	37106	-0.07752	1.36247e-141
SP1_MA0079.5	SP1	MA0079.5	C_PATZ1	239011	0.16156	138705	0.14671	131246	0.20801	3.87039e-203
Spi1_MA0080.6	Spi1	MA0080.6	C_Spi1	257013	0.08423	106713	0.08377	107673	0.0076	1.72064e-63
SPIB_MA0081.2	SPIB	MA0081.2	C_Spi1	217610	0.08776	92792	0.08706	93559	0.00915	3.52202e-69
SRF_MA0083.3	SRF	MA0083.3	C_SRF	27750	0.06698	9494	0.06733	9577	0.00655	7.61355e-19
SRY_MA0084.1	SRY	MA0084.1	C_SRY	62069	0.05925	16710	0.06322	17605	-0.07762	1.12756e-125
Sox5_MA0087.2	Sox5	MA0087.2	C_Sox17	79683	0.10516	32581	0.11205	33775	-0.07416	4.98935e-130
ZNF143_MA0088.2	ZNF143	MA0088.2	C_ZNF76	83822	0.09713	35382	0.09723	35329	0.01962	7.88712e-76
MAFGNFE2L1_MA0089.2	MAFG::NFE2L1	MA0089.2	C_MAFG::NFE2L1	101591	0.07213	38246	0.07206	38221	0.01754	7.27188e-76
TEAD1_MA0090.3	TEAD1	MA0090.3	C_TEAD4	93511	0.07079	35833	0.07238	36117	-0.00104	0.232738
TAL1TCF3_MA0091.1	TAL1::TCF3	MA0091.1	C_TAL1::TCF3	93925	0.07051	34926	0.07332	35320	-0.01534	7.77446e-65
Hand1Tcf3_MA0092.1	Hand1::Tcf3	MA0092.1	C_Hand1::Tcf3	89793	0.07858	36933	0.08033	37410	-0.00811	9.51058e-41
USF1_MA0093.3	USF1	MA0093.3	C_BHLHE41	75610	0.09463	32973	0.09293	32760	0.03831	1.29402e-103
Yy1_MA0095.3	Yy1	MA0095.3	C_Yy1	94351	0.07645	32546	0.07671	33034	-0.00693	7.16146e-41
ETS1_MA0098.3	ETS1	MA0098.3	C_ETS1	47612	0.14767	24065	0.13947	23846	0.07063	1.36507e-121
FOSJUN_MA0099.3	FOS::JUN	MA0099.3	C_FOSL1::JUN	70206	0.06923	23677	0.0677	23515	0.05331	1.12948e-113
MYB_MA0100.3	MYB	MA0100.3	C_MYB	73042	0.07581	29003	0.07783	29372	-0.019	2.62014e-72
REL_MA0101.1	REL	MA0101.1	C_REL	65125	0.09224	28753	0.09077	28496	0.03455	1.64326e-92
CEBPA_MA0102.4	CEBPA	MA0102.4	C_CEBPB	50479	0.05815	14667	0.06099	15279	-0.04926	6.83883e-112
ZEB1_MA0103.3	ZEB1	MA0103.3	C_ASCL1	137428	0.06901	58598	0.06759	55362	0.10151	7.54104e-156
MYCN_MA0104.4	MYCN	MA0104.4	C_MYCN	36840	0.11785	19013	0.11275	18411	0.10137	3.62974e-128
NFKB1_MA0105.4	NFKB1	MA0105.4	C_NFKB2	36279	0.09567	17670	0.0911	16978	0.10347	4.61691e-132
TP53_MA0106.3	TP53	MA0106.3	C_TP53	47790	0.07604	18856	0.07571	18688	0.03287	8.49673e-86
RELA_MA0107.1	RELA	MA0107.1	C_RELA	72051	0.08452	30932	0.08375	30660	0.02861	2.63233e-90
TBP_MA0108.2	TBP	MA0108.2	C_TBP	42163	0.06104	12793	0.06163	12979	0.00392	6.50934e-13
Spz1_MA0111.1	Spz1	MA0111.1	C_Spz1	76896	0.08351	33348	0.08322	33137	0.02801	5.55841e-87
ESR1_MA0112.3	ESR1	MA0112.3	C_ESR2	57467	0.08585	26581	0.08414	25882	0.05907	1.2527e-116
NR3C1_MA0113.3	NR3C1	MA0113.3	C_Ar	43657	0.08379	18336	0.09874	19376	-0.15857	3.13358e-154
HNF4A_MA0114.4	HNF4A	MA0114.4	C_HNF4G	91355	0.07802	36793	0.08	37180	-0.01537	6.43519e-71
NR1H2RXRA_MA0115.1	NR1H2::RXRA	MA0115.1	C_NR1H2::RXRA	76236	0.07307	30288	0.07264	30062	0.0259	8.37344e-86
Znf423_MA0116.1	Znf423	MA0116.1	C_Znf423	77627	0.10265	38322	0.09939	37052	0.08349	8.61591e-134
Mafb_MA0117.2	Mafb	MA0117.2	C_MAFF	74264	0.07238	28019	0.07407	28418	-0.02162	2.02282e-82
NFICTLX1_MA0119.1	NFIC::TLX1	MA0119.1	C_NFIB	91680	0.11656	48307	0.12096	47672	-0.00542	5.90565e-30
Nkx3-2_MA0122.3	Nkx3-2	MA0122.3	C_ISL2	58770	0.05175	17211	0.05297	17671	-0.02581	9.98029e-84
Nkx3-1_MA0124.2	Nkx3-1	MA0124.2	C_ISL2	55839	0.0637	19836	0.06464	20163	-0.01475	1.16802e-54
Nobox_MA0125.1	Nobox	MA0125.1	C_Dlx2	34461	0.06753	10357	0.06992	10720	-0.04043	1.91999e-90
ZNF354C_MA0130.1	ZNF354C	MA0130.1	C_ZNF354C	215514	0.09386	100155	0.09187	98669	0.05619	1.92277e-148
HINFP_MA0131.2	HINFP	MA0131.2	C_HINFP	34399	0.15209	20605	0.13432	19320	0.27423	4.63868e-173
PDX1_MA0132.2	PDX1	MA0132.2	C_ESX1	32623	0.05869	9734	0.0613	10112	-0.05153	5.82965e-97
Lhx3_MA0135.1	Lhx3	MA0135.1	C_Lhx3	65448	0.03818	12341	0.03979	13176	-0.05552	2.45406e-110
Elf5_MA0136.3	Elf5	MA0136.3	C_Elf5	204794	0.08239	85013	0.08233	85901	0.00175	5.00589e-15
STAT1_MA0137.3	STAT1	MA0137.3	C_Stat4	107020	0.07041	37247	0.07226	38099	-0.02526	1.44962e-96
REST_MA0138.2	REST	MA0138.2	C_REST	129972	0.10187	64640	0.10134	63244	0.05188	9.84893e-130
CTCF_MA0139.1	CTCF	MA0139.1	C_CTCF	162055	0.14437	94180	0.14132	92036	0.06296	3.9309e-136
GATA1TAL1_MA0140.2	GATA1::TAL1	MA0140.2	C_GATA1::TAL1	59440	0.06465	20635	0.06617	21052	-0.02079	7.0375e-73
ESRRB_MA0141.3	ESRRB	MA0141.3	C_NR5A1	76175	0.06739	29486	0.06765	29525	0.01304	3.98894e-56
Pou5f1Sox2_MA0142.1	Pou5f1::Sox2	MA0142.1	C_Pou5f1::Sox2	106008	0.05361	28256	0.05677	29488	-0.0551	2.48793e-124
SOX2_MA0143.4	SOX2	MA0143.4	C_SOX13	74821	0.09353	28044	0.09918	29133	-0.06475	9.50851e-122
STAT3_MA0144.2	STAT3	MA0144.2	C_Stat4	139033	0.07369	50156	0.07563	51079	-0.02431	8.74181e-98
Tfcp2l1_MA0145.2	Tfcp2l1	MA0145.2	C_Tfcp2l1	117307	0.11536	61569	0.11323	60017	0.0713	1.19165e-138
Zfx_MA0146.2	Zfx	MA0146.2	C_Zfx	139241	0.1415	80866	0.132	76954	0.17103	1.56806e-182
MYC_MA0147.3	MYC	MA0147.3	C_MYC	57482	0.11076	29242	0.1064	28339	0.09626	9.06449e-132
FOXA1_MA0148.4	FOXA1	MA0148.4	C_FOXN3	81809	0.05614	23584	0.05896	24880	-0.05559	9.07128e-120
EWSR1-FLI1_MA0149.1	EWSR1-FLI1	MA0149.1	C_EWSR1-FLI1	284012	0.0891	122649	0.08799	122573	0.02967	8.89707e-125
Nfe2l2_MA0150.2	Nfe2l2	MA0150.2	C_MAFG::NFE2L1	99220	0.08055	41086	0.08059	40845	0.02074	2.15463e-81
Arid3a_MA0151.1	Arid3a	MA0151.1	C_Arid3a	334755	0.0414	73270	0.04303	77096	-0.05144	3.08978e-141
Nfatc2_MA0152.2	Nfatc2	MA0152.2	C_Nfatc2	119672	0.06098	36453	0.06261	37812	-0.03817	5.4559e-112
HNF1B_MA0153.2	HNF1B	MA0153.2	C_HNF1A	35571	0.04156	7589	0.04305	8061	-0.05029	1.36535e-96
EBF1_MA0154.4	EBF1	MA0154.4	C_EBF1	130422	0.09985	63851	0.09841	62164	0.06677	3.21597e-139
INSM1_MA0155.1	INSM1	MA0155.1	C_INSM1	119334	0.10745	59770	0.1029	57647	0.10202	2.71633e-159
FEV_MA0156.3	FEV	MA0156.3	C_ETS1	32928	0.18996	18557	0.17605	18314	0.11243	2.04228e-135
Foxo3_MA0157.3	Foxo3	MA0157.3	C_FOXN3	69039	0.0659	22414	0.07013	23532	-0.07793	2.2639e-132
HOXA5_MA0158.2	HOXA5	MA0158.2	C_HOXA5	32679	0.063	10736	0.06495	11141	-0.03794	3.90766e-87
RARARXRA_MA0159.1	RARA::RXRA	MA0159.1	C_RARA::RXRA	86715	0.09123	40655	0.08864	39561	0.07267	3.59646e-133
NR4A2_MA0160.2	NR4A2	MA0160.2	C_NR4A1	83795	0.06435	28978	0.06534	29132	-0.00349	2.52029e-20
NFIC_MA0161.2	NFIC	MA0161.2	C_NFIX	106134	0.09871	49478	0.10372	50039	-0.03111	4.50452e-104
EGR1_MA0162.4	EGR1	MA0162.4	C_EGR1	200671	0.13117	108837	0.11716	101217	0.23983	2.03439e-201
PLAG1_MA0163.1	PLAG1	MA0163.1	C_PLAG1	164068	0.11776	88501	0.11059	84103	0.15087	8.55505e-177
Nr2e3_MA0164.1	Nr2e3	MA0164.1	C_Nr2e3	42625	0.07288	15842	0.07504	16273	-0.02897	5.52415e-84
ESR2_MA0258.2	ESR2	MA0258.2	C_ESR2	126642	0.09135	61439	0.08973	59854	0.06634	8.64891e-141
ARNTHIF1A_MA0259.1	ARNT::HIF1A	MA0259.1	C_ARNT::HIF1A	27743	0.10019	13645	0.0971	13214	0.08592	1.52267e-117
SOX10_MA0442.2	SOX10	MA0442.2	C_SOX4	139391	0.09455	54640	0.10169	56757	-0.08704	1.70922e-152
Atoh1_MA0461.2	Atoh1	MA0461.2	C_ATOH7	50253	0.05614	15500	0.05759	15729	0.00541	1.10851e-21
BATFJUN_MA0462.2	BATF::JUN	MA0462.2	C_FOSL1::JUN	83377	0.06772	28555	0.06655	28535	0.0423	7.53597e-108
BCL6_MA0463.2	BCL6	MA0463.2	C_BCL6	74593	0.0695	27850	0.07096	28188	-0.01038	2.33418e-47
BHLHE40_MA0464.2	BHLHE40	MA0464.2	C_MYC	26106	0.12618	13186	0.12014	12898	0.08367	1.53121e-112
CDX2_MA0465.2	CDX2	MA0465.2	C_CDX2	77609	0.04804	18101	0.05001	19094	-0.0536	1.50862e-122
CEBPB_MA0466.3	CEBPB	MA0466.3	C_CEBPB	6417	0.10372	2532	0.10497	2523	-0.023	3.7796e-35
Crx_MA0467.2	Crx	MA0467.2	C_OTX2	54578	0.05989	19003	0.05986	18912	0.01133	2.4251e-51
DUX4_MA0468.1	DUX4	MA0468.1	C_DUX4	53096	0.05147	13428	0.05306	14098	-0.04087	4.35215e-100
E2F3_MA0469.3	E2F3	MA0469.3	C_E2F3	7517	0.08494	2798	0.08565	2792	0.00753	6.52e-07
E2F4_MA0470.2	E2F4	MA0470.2	C_ZNF417	9656	0.16836	5520	0.16157	5392	0.09902	6.5312e-103
E2F6_MA0471.2	E2F6	MA0471.2	C_E2F6	188683	0.1341	101147	0.12489	97297	0.14776	1.08367e-187
EGR2_MA0472.2	EGR2	MA0472.2	C_EGR1	61147	0.13206	31705	0.11826	29443	0.23138	1.39843e-178
ELF1_MA0473.3	ELF1	MA0473.3	C_Erg	180182	0.09986	83505	0.0982	83323	0.02624	9.36054e-102
Erg_MA0474.3	Erg	MA0474.3	C_Erg	191423	0.09649	87509	0.09514	87439	0.02037	1.43979e-98
FLI1_MA0475.2	FLI1	MA0475.2	C_ETS1	36878	0.16398	19162	0.15371	19000	0.08056	2.25767e-117
FOS_MA0476.1	FOS	MA0476.1	C_FOSL1::JUN	81005	0.06678	27122	0.06589	27107	0.04348	2.77848e-111
FOSL1_MA0477.2	FOSL1	MA0477.2	C_FOSL1::JUN	74320	0.0681	25201	0.06675	25138	0.05012	5.02984e-114
FOSL2_MA0478.1	FOSL2	MA0478.1	C_FOSL1::JUN	110181	0.06758	40080	0.06632	39273	0.05843	3.50271e-129
FOXH1_MA0479.1	FOXH1	MA0479.1	C_FOXH1	71984	0.06517	24578	0.06724	25222	-0.02773	9.49242e-93
Foxo1_MA0480.2	Foxo1	MA0480.2	C_FOXN3	77787	0.07132	28102	0.07478	29156	-0.05601	1.44466e-119
FOXP1_MA0481.3	FOXP1	MA0481.3	C_FOXN3	77226	0.05942	22982	0.06268	23998	-0.06265	1.8221e-128
GATA4_MA0482.2	GATA4	MA0482.2	C_Gata3	63880	0.05498	19615	0.05631	20215	-0.03043	2.58827e-99
Gfi1B_MA0483.1	Gfi1B	MA0483.1	C_Gfi1B	117991	0.06947	41800	0.07079	42957	-0.02706	2.82972e-98
HNF4G_MA0484.2	HNF4G	MA0484.2	C_HNF4G	92683	0.07958	38014	0.08146	38330	-0.01324	2.23824e-63
HOXC9_MA0485.2	HOXC9	MA0485.2	C_HOXC10	24504	0.04801	6046	0.04905	6221	-0.028	7.4382e-68
HSF1_MA0486.2	HSF1	MA0486.2	C_HSF4	59428	0.06361	19661	0.06567	20058	-0.0228	2.29343e-71
JUN_MA0488.1	JUN	MA0488.1	C_FOSL1::JUN	69841	0.09367	27599	0.09091	27529	0.03127	9.07396e-92
Jun_MA0489.2	Jun	MA0489.2	C_FOSL1::JUN	77279	0.07046	27419	0.06926	27228	0.05116	9.7098e-119
JUNB_MA0490.2	JUNB	MA0490.2	C_FOSL1::JUN	75710	0.06677	25182	0.06547	25131	0.04698	3.18194e-111
JUND_MA0491.2	JUND	MA0491.2	C_FOSL1::JUN	71326	0.06659	23526	0.06531	23457	0.04827	1.28294e-108
JUND_MA0492.1	JUND	MA0492.1	C_FOSL1::JUN	60066	0.09779	23678	0.09475	23592	0.03495	1.05623e-95
KLF1_MA0493.2	KLF1	MA0493.2	C_KLF4	251713	0.15035	140606	0.13782	134277	0.17593	1.42993e-195
Nr1h3Rxra_MA0494.1	Nr1h3::Rxra	MA0494.1	C_Nr1h3::Rxra	79719	0.08868	36245	0.08869	35775	0.0298	9.87174e-98
MAFF_MA0495.3	MAFF	MA0495.3	C_MAFF	93315	0.06335	31390	0.06558	32144	-0.03316	1.37694e-98
MAFK_MA0496.3	MAFK	MA0496.3	C_MAFK	119888	0.08446	51475	0.08374	51011	0.04046	7.17744e-111
MEF2C_MA0497.1	MEF2C	MA0497.1	C_MEF2A	142180	0.04374	31075	0.04502	32104	-0.03205	7.05282e-112
MEIS1_MA0498.2	MEIS1	MA0498.2	C_MEIS1	49983	0.07055	17661	0.07191	17807	0.00178	0.000407996
MYOD1_MA0499.2	MYOD1	MA0499.2	C_MYOD1	147869	0.08805	68132	0.08976	66331	0.03989	1.03602e-118
MYOG_MA0500.2	MYOG	MA0500.2	C_Tcf12	106739	0.11448	54627	0.11971	54412	-0.01659	8.10357e-81
MAFNFE2_MA0501.1	MAF::NFE2	MA0501.1	C_MAFG::NFE2L1	98298	0.07108	36861	0.07141	36830	0.01241	3.18598e-62
NFYB_MA0502.2	NFYB	MA0502.2	C_NFYB	70768	0.16618	35310	0.16136	35024	0.03867	1.40598e-108
NR2C2_MA0504.1	NR2C2	MA0504.1	C_NR2C2	153918	0.10169	76709	0.09654	73723	0.11374	1.49843e-165
Nr5A2_MA0505.2	Nr5A2	MA0505.2	C_NR5A1	128332	0.07309	55354	0.07213	54304	0.04448	2.57835e-120
Nrf1_MA0506.2	Nrf1	MA0506.2	C_Nrf1	73922	0.16438	43711	0.14628	41147	0.25608	1.47685e-185
POU2F2_MA0507.2	POU2F2	MA0507.2	C_POU1F1	83440	0.05064	19785	0.05342	20933	-0.05018	1.44064e-122
PRDM1_MA0508.3	PRDM1	MA0508.3	C_PRDM1	177561	0.07147	64473	0.07341	66215	-0.02128	2.0906e-93
RFX1_MA0509.3	RFX1	MA0509.3	C_RFX3	41073	0.09436	16780	0.09378	16682	0.02649	3.25674e-75
RFX5_MA0510.2	RFX5	MA0510.2	C_RFX3	44980	0.09669	18486	0.09663	18490	0.02208	6.17327e-73
RUNX2_MA0511.2	RUNX2	MA0511.2	C_Bcl11B	37394	0.07977	14962	0.08007	15184	-0.01536	5.71664e-55
Rxra_MA0512.2	Rxra	MA0512.2	C_NR2C2	82428	0.07432	34222	0.07303	33796	0.04247	8.04477e-110
Sox3_MA0514.2	Sox3	MA0514.2	C_SOX13	72869	0.10599	30325	0.11225	31328	-0.06143	3.17232e-121
Sox6_MA0515.1	Sox6	MA0515.1	C_Sox6	129524	0.09977	50997	0.10714	52950	-0.08786	1.83597e-146
SP2_MA0516.3	SP2	MA0516.3	C_PATZ1	201593	0.18914	120641	0.17162	115732	0.19947	4.09457e-198
STAT1STAT2_MA0517.1	STAT1::STAT2	MA0517.1	C_STAT1::STAT2	185159	0.0594	56045	0.06157	58237	-0.05601	1.21989e-136
Stat4_MA0518.1	Stat4	MA0518.1	C_Stat4	124562	0.07216	44743	0.07414	45680	-0.02683	7.65151e-95
Stat5aStat5b_MA0519.1	Stat5a::Stat5b	MA0519.1	C_Stat5b	113284	0.07309	41076	0.07514	41634	-0.02281	6.29691e-95
Stat6_MA0520.1	Stat6	MA0520.1	C_Stat6	96233	0.06185	30326	0.06472	31544	-0.05049	3.02942e-121
Tcf12_MA0521.2	Tcf12	MA0521.2	C_Tcf12	109557	0.11523	56449	0.12021	56173	-0.01306	2.36589e-67
TCF3_MA0522.3	TCF3	MA0522.3	C_ASCL1	117415	0.10068	56945	0.09607	54408	0.11878	6.55182e-167
TCF7L2_MA0523.1	TCF7L2	MA0523.1	C_Lef1	108999	0.06492	36729	0.06774	37844	-0.03952	4.76738e-113
TFAP2C_MA0524.2	TFAP2C	MA0524.2	C_TFAP2A	80546	0.1188	43330	0.11161	41228	0.14925	2.45467e-161
TP63_MA0525.2	TP63	MA0525.2	C_TP63	35488	0.06893	12026	0.06979	12222	-0.00925	1.89381e-28
USF2_MA0526.4	USF2	MA0526.4	C_BHLHE41	23460	0.13845	12058	0.13229	11881	0.06647	8.59176e-103
ZBTB33_MA0527.1	ZBTB33	MA0527.1	C_ZBTB33	20433	0.16733	12146	0.14807	11418	0.26869	1.76219e-162
ZNF263_MA0528.2	ZNF263	MA0528.2	C_SP5	252236	0.12435	132725	0.11717	127928	0.12535	5.93967e-178
Bach1Mafk_MA0591.1	Bach1::Mafk	MA0591.1	C_MAFK	110421	0.08975	49546	0.08868	48933	0.04205	9.64421e-114
ESRRA_MA0592.3	ESRRA	MA0592.3	C_NR5A1	101700	0.07419	43512	0.07383	42817	0.03763	1.34523e-116
FOXP2_MA0593.1	FOXP2	MA0593.1	C_FOXN3	112143	0.06321	35253	0.06759	37089	-0.08059	2.5624e-140
HOXA9_MA0594.2	HOXA9	MA0594.2	C_HOXA9	5929	0.09148	2286	0.0919	2315	0.01666	7.54214e-22
SREBF1_MA0595.1	SREBF1	MA0595.1	C_SREBF1	69074	0.09186	30983	0.08994	30539	0.05455	5.48949e-120
SREBF2_MA0596.1	SREBF2	MA0596.1	C_SREBF1	73025	0.08304	31321	0.08198	31125	0.03873	2.833e-98
THAP1_MA0597.2	THAP1	MA0597.2	C_THAP1	164869	0.11805	88844	0.11387	85969	0.09953	9.87803e-158
EHF_MA0598.3	EHF	MA0598.3	C_Erg	164916	0.09651	73951	0.09526	74467	0.00902	2.55207e-58
KLF5_MA0599.1	KLF5	MA0599.1	C_KLF4	295781	0.15106	163698	0.13949	157237	0.15753	2.74822e-189
RFX2_MA0600.2	RFX2	MA0600.2	C_RFX3	40599	0.09485	16414	0.09423	16325	0.02867	1.03563e-75
Arid3b_MA0601.1	Arid3b	MA0601.1	C_Arid3b	63452	0.03936	11810	0.04139	12565	-0.05918	1.9408e-115
Arid5a_MA0602.1	Arid5a	MA0602.1	C_Arid5a	38979	0.03914	7268	0.04079	7737	-0.04992	1.52181e-107
Arntl_MA0603.1	Arntl	MA0603.1	C_MYC	29155	0.12663	14863	0.12123	14589	0.07245	6.07537e-107
Atf1_MA0604.1	Atf1	MA0604.1	C_Atf1	15857	0.1706	8034	0.15787	7795	0.11992	1.24454e-118
ATF3_MA0605.2	ATF3	MA0605.2	C_FOSL1::JUN	23515	0.14021	11126	0.13199	10860	0.08449	3.41324e-110
Nfat5_MA0606.2	Nfat5	MA0606.2	C_Nfat5	139342	0.05333	37478	0.05502	38997	-0.04054	7.0277e-114
BHLHA15_MA0607.2	BHLHA15	MA0607.2	C_ATOH7	39983	0.05267	11857	0.05309	11944	0.01646	1.30736e-55
Creb3l2_MA0608.1	Creb3l2	MA0608.1	C_Creb3l2	26247	0.1232	12974	0.11739	12723	0.0759	6.50485e-113
CREM_MA0609.2	CREM	MA0609.2	C_FOSL1::JUN	30044	0.14005	15262	0.13218	14999	0.08041	3.10498e-110
DMRT3_MA0610.1	DMRT3	MA0610.1	C_DMRT3	47593	0.0501	13330	0.05169	13867	-0.03318	8.77537e-91
Dux_MA0611.2	Dux	MA0611.2	C_Dux	36366	0.05212	9581	0.05419	10122	-0.0435	1.1218e-90
EMX1_MA0612.2	EMX1	MA0612.2	C_ESX1	16857	0.06529	5388	0.06859	5633	-0.06322	2.96987e-94
FOXG1_MA0613.1	FOXG1	MA0613.1	C_FOXN3	83143	0.05604	23368	0.05939	24582	-0.0684	4.5666e-130
Foxj2_MA0614.1	Foxj2	MA0614.1	C_FOXN3	58381	0.06066	17082	0.06428	17904	-0.07787	1.30584e-128
Gmeb1_MA0615.1	Gmeb1	MA0615.1	C_Gmeb1	9308	0.16542	5085	0.15092	4823	0.17455	1.60239e-119
HES2_MA0616.2	HES2	MA0616.2	C_MYC	34510	0.13548	18594	0.12433	17755	0.16838	5.26157e-149
LBX1_MA0618.1	LBX1	MA0618.1	C_PAX4	44921	0.05288	11929	0.05522	12494	-0.04911	1.9403e-99
LIN54_MA0619.1	LIN54	MA0619.1	C_LIN54	84864	0.04301	17750	0.04545	18888	-0.06847	3.17616e-131
MITF_MA0620.3	MITF	MA0620.3	C_BHLHE41	33681	0.11482	15493	0.1111	15386	0.04194	2.16032e-90
mix-a_MA0621.1	mix-a	MA0621.1	C_ARGFX	45696	0.04767	10841	0.05005	11352	-0.05811	1.08e-109
Mlxip_MA0622.1	Mlxip	MA0622.1	C_MYC	36072	0.11044	17662	0.10665	17321	0.07366	1.04468e-115
NEUROG1_MA0623.2	NEUROG1	MA0623.2	C_ATOH7	34480	0.05141	10345	0.05148	10405	0.01518	9.82095e-49
Nfatc1_MA0624.2	Nfatc1	MA0624.2	C_Nfatc2	121370	0.06043	36967	0.06216	38094	-0.03406	1.30047e-108
NFATC3_MA0625.2	NFATC3	MA0625.2	C_Nfatc2	71545	0.0663	22959	0.06719	23630	-0.01972	8.27517e-78
Npas2_MA0626.1	Npas2	MA0626.1	C_MYC	33475	0.10454	16269	0.10131	15815	0.07759	7.0066e-117
POU2F3_MA0627.2	POU2F3	MA0627.2	C_POU2F3	100473	0.04921	23885	0.05157	25059	-0.04306	1.36667e-109
POU6F1_MA0628.1	POU6F1	MA0628.1	C_EMX2	22410	0.05572	5919	0.05821	6181	-0.04389	8.9056e-77
Rhox11_MA0629.1	Rhox11	MA0629.1	C_Rhox11	43714	0.06935	15835	0.0718	16183	-0.04574	2.92096e-105
SHOX_MA0630.1	SHOX	MA0630.1	C_PAX4	35593	0.06531	10558	0.06736	10851	-0.04534	9.07705e-90
Six3_MA0631.1	Six3	MA0631.1	C_Six3	34377	0.05546	11125	0.05513	11118	0.00893	7.05258e-29
TCFL5_MA0632.2	TCFL5	MA0632.2	C_TCFL5	35856	0.14678	20644	0.12843	19512	0.2599	7.76922e-166
Twist2_MA0633.2	Twist2	MA0633.2	C_Tcf12	118036	0.11791	61368	0.12319	61089	-0.01339	1.3841e-66
ALX3_MA0634.1	ALX3	MA0634.1	C_PAX4	45736	0.05639	12381	0.05897	12911	-0.05429	1.11917e-107
BARHL2_MA0635.1	BARHL2	MA0635.1	C_BARHL2	18079	0.06267	5823	0.06357	6003	-0.02775	5.90627e-59
BHLHE41_MA0636.1	BHLHE41	MA0636.1	C_BHLHE41	22013	0.13771	11486	0.13192	11205	0.07006	7.51235e-97
CREB3_MA0638.1	CREB3	MA0638.1	C_CREB3L4	24992	0.12709	12096	0.12039	11825	0.07993	2.40549e-110
DBP_MA0639.1	DBP	MA0639.1	C_NFIL3	23094	0.06376	6336	0.06375	6518	0.00564	3.09848e-13
ELF3_MA0640.2	ELF3	MA0640.2	C_Erg	193736	0.09462	87705	0.09328	87563	0.02529	1.4314e-110
ELF4_MA0641.1	ELF4	MA0641.1	C_Erg	49279	0.14707	25371	0.13895	25106	0.06507	3.76062e-121
EN2_MA0642.2	EN2	MA0642.2	C_DLX6	39786	0.06956	12141	0.07151	12483	-0.0339	3.33668e-91
Esrrg_MA0643.1	Esrrg	MA0643.1	C_NR5A1	71421	0.07021	28898	0.07052	28775	0.02251	1.95734e-77
ESX1_MA0644.2	ESX1	MA0644.2	C_ESX1	39568	0.06818	12285	0.07057	12691	-0.05557	6.00286e-102
ETV6_MA0645.1	ETV6	MA0645.1	C_Spi1	61834	0.14597	32736	0.13832	32524	0.05904	7.72136e-117
GCM1_MA0646.1	GCM1	MA0646.1	C_GCM2	51511	0.08801	23353	0.0861	22804	0.06747	9.93022e-116
GRHL1_MA0647.1	GRHL1	MA0647.1	C_GRHL2	29174	0.05925	9333	0.06037	9570	-0.038	3.29747e-84
GSC_MA0648.1	GSC	MA0648.1	C_OTX2	31006	0.07063	11653	0.0715	11718	-0.01106	1.78635e-35
HEY2_MA0649.1	HEY2	MA0649.1	C_MYC	36251	0.11068	18106	0.10593	17512	0.10445	1.81074e-133
Hoxa13_MA0650.3	Hoxa13	MA0650.3	C_HOXB13	75435	0.051	18431	0.05267	19137	-0.04655	3.98498e-112
HOXC11_MA0651.2	HOXC11	MA0651.2	C_HOXC10	19973	0.05342	5592	0.05424	5584	-0.01374	6.12053e-31
IRF8_MA0652.1	IRF8	MA0652.1	C_Irf1	48476	0.06914	16764	0.07127	17558	-0.06072	2.14184e-113
IRF9_MA0653.1	IRF9	MA0653.1	C_Irf1	64719	0.06258	20158	0.0652	21130	-0.06903	3.87307e-123
ISX_MA0654.1	ISX	MA0654.1	C_PAX4	42838	0.06408	12629	0.0662	13042	-0.04473	1.22606e-96
JDP2_MA0655.1	JDP2	MA0655.1	C_FOSL1::JUN	60143	0.05909	17729	0.05843	17854	0.03347	4.50914e-91
JDP2_MA0656.1	JDP2	MA0656.1	C_FOSL1::JUN	29940	0.12782	13367	0.12146	13218	0.06311	2.48699e-107
KLF13_MA0657.1	KLF13	MA0657.1	C_KLF13	62328	0.16572	33281	0.15449	32333	0.12107	1.09355e-149
LHX6_MA0658.1	LHX6	MA0658.1	C_EMX2	26794	0.05784	7666	0.06029	7983	-0.05001	2.1668e-94
Mafg_MA0659.3	Mafg	MA0659.3	C_MAFK	126709	0.08324	54809	0.08251	53899	0.04584	2.69967e-120
MEF2B_MA0660.1	MEF2B	MA0660.1	C_MEF2A	67310	0.04801	15576	0.04923	16052	-0.01881	2.82339e-74
MEOX1_MA0661.1	MEOX1	MA0661.1	C_EMX2	35277	0.0588	10655	0.06136	11042	-0.04659	6.40842e-98
MIXL1_MA0662.1	MIXL1	MA0662.1	C_PAX4	35869	0.06539	10820	0.06751	11123	-0.04653	1.17448e-98
MLX_MA0663.1	MLX	MA0663.1	C_MYC	22097	0.1311	10884	0.1268	10790	0.04721	2.46362e-91
MLXIPL_MA0664.1	MLXIPL	MA0664.1	C_MYC	23069	0.127	11561	0.1229	11416	0.04852	6.74481e-86
MSC_MA0665.1	MSC	MA0665.1	C_MSC	110050	0.08768	48190	0.09182	48506	-0.02032	9.42282e-87
MSX1_MA0666.2	MSX1	MA0666.2	C_DLX6	39206	0.06834	12211	0.07036	12605	-0.03646	9.93468e-88
MYF6_MA0667.1	MYF6	MA0667.1	C_Tcf21	64318	0.07648	25313	0.08092	25768	-0.04076	1.67908e-98
Neurod2_MA0668.2	Neurod2	MA0668.2	C_Neurod2	156713	0.08862	67996	0.09211	68043	-0.00505	3.22937e-40
NEUROG2_MA0669.1	NEUROG2	MA0669.1	C_ATOH7	57223	0.06436	19734	0.0666	19950	-0.01003	1.26955e-47
NFIA_MA0670.1	NFIA	MA0670.1	C_NFIX	87488	0.08964	37641	0.0953	38390	-0.04736	1.15852e-115
NFIX_MA0671.1	NFIX	MA0671.1	C_NFIX	94279	0.10153	44329	0.10663	44696	-0.02803	9.32473e-98
NKX2-3_MA0672.1	NKX2-3	MA0672.1	C_NKX2-3	74018	0.07264	29141	0.07375	29285	-0.00883	3.26759e-43
NKX2-8_MA0673.1	NKX2-8	MA0673.1	C_NKX2-3	64370	0.07019	24639	0.07132	24805	-0.00957	3.90324e-41
NKX6-1_MA0674.1	NKX6-1	MA0674.1	C_LHX5	52155	0.05276	14293	0.05512	14813	-0.0508	1.34923e-107
NKX6-2_MA0675.1	NKX6-2	MA0675.1	C_LHX5	51985	0.05407	14298	0.05637	14773	-0.04667	2.02333e-105
Nr2e1_MA0676.1	Nr2e1	MA0676.1	C_Nr2e1	69409	0.05228	19823	0.05356	20549	-0.03031	1.84669e-90
Nr2f6_MA0677.1	Nr2f6	MA0677.1	C_NR2C2	89555	0.07732	38571	0.07564	37780	0.05367	2.82743e-121
OLIG2_MA0678.1	OLIG2	MA0678.1	C_ATOH7	33142	0.04417	8229	0.04425	8425	0.00791	2.26353e-24
ONECUT1_MA0679.2	ONECUT1	MA0679.2	C_ONECUT1	78011	0.03972	15678	0.0407	16346	-0.04102	2.68047e-108
Pax7_MA0680.2	Pax7	MA0680.2	C_Pax7	50992	0.03905	9664	0.04081	10230	-0.05818	4.77511e-118
PHOX2B_MA0681.2	PHOX2B	MA0681.2	C_PHOX2A	91801	0.03443	14789	0.03598	15832	-0.06897	2.69548e-131
PITX1_MA0682.2	PITX1	MA0682.2	C_OTX2	51062	0.06284	18537	0.06252	18417	0.0247	1.42862e-80
POU4F2_MA0683.1	POU4F2	MA0683.1	C_POU4F2	73476	0.04362	15617	0.046	16621	-0.0535	1.56523e-118
RUNX3_MA0684.2	RUNX3	MA0684.2	C_RUNX3	78118	0.06767	28682	0.068	28945	-0.00178	0.000494299
SP4_MA0685.2	SP4	MA0685.2	C_PATZ1	256846	0.15819	147045	0.14415	139646	0.19583	8.61144e-199
SPDEF_MA0686.1	SPDEF	MA0686.1	C_SPDEF	28213	0.13628	13944	0.12963	13895	0.06059	3.78319e-98
SPIC_MA0687.1	SPIC	MA0687.1	C_SPIC	103819	0.07453	38438	0.07511	39529	-0.03156	2.4161e-101
TBX2_MA0688.1	TBX2	MA0688.1	C_TBX18	70879	0.05868	24605	0.05822	24236	0.03999	1.46034e-107
TBX20_MA0689.1	TBX20	MA0689.1	C_TBX18	75050	0.06051	26467	0.05998	26137	0.03698	3.66052e-100
TBX21_MA0690.2	TBX21	MA0690.2	C_TBX18	69666	0.06066	24662	0.06035	24332	0.03553	3.55093e-101
TFAP4_MA0691.1	TFAP4	MA0691.1	C_TFAP4	88738	0.09971	41717	0.10424	41959	-0.025	1.47339e-95
TFEB_MA0692.1	TFEB	MA0692.1	C_BHLHE41	47014	0.11225	22026	0.1092	21839	0.04507	3.94022e-103
Vdr_MA0693.3	Vdr	MA0693.3	C_Vdr	93888	0.06307	34419	0.06412	34725	0.00133	0.00116691
ZBTB7B_MA0694.1	ZBTB7B	MA0694.1	C_ZBTB7B	56856	0.09617	26929	0.0892	25574	0.15178	1.65845e-159
ZBTB7C_MA0695.1	ZBTB7C	MA0695.1	C_ZBTB7B	64739	0.09954	31334	0.09243	29785	0.15095	2.42961e-164
ZIC1_MA0696.1	ZIC1	MA0696.1	C_ZIC5	103445	0.1245	57499	0.11778	55123	0.13632	4.44855e-164
Zic3_MA0697.2	Zic3	MA0697.2	C_Zic2	208222	0.10908	105721	0.10705	103654	0.06398	1.42379e-147
ZBTB18_MA0698.1	ZBTB18	MA0698.1	C_TWIST1	127463	0.07696	52208	0.07945	52326	-0.00224	5.45923e-13
LBX2_MA0699.1	LBX2	MA0699.1	C_PAX4	34143	0.07166	10942	0.07369	11168	-0.03489	1.32241e-87
LHX2_MA0700.2	LHX2	MA0700.2	C_DLX6	43432	0.06318	11901	0.06516	12362	-0.04046	2.75914e-95
LHX9_MA0701.2	LHX9	MA0701.2	C_PAX4	35593	0.06531	10558	0.06736	10852	-0.04534	9.07705e-90
LMX1A_MA0702.2	LMX1A	MA0702.2	C_ARGFX	33834	0.04787	8574	0.05004	8921	-0.05349	2.00895e-103
LMX1B_MA0703.2	LMX1B	MA0703.2	C_ARGFX	51455	0.04202	11189	0.0439	11712	-0.0566	1.90768e-110
Lhx4_MA0704.1	Lhx4	MA0704.1	C_ARGFX	27053	0.04598	6542	0.04803	6811	-0.05798	8.29987e-99
Lhx8_MA0705.1	Lhx8	MA0705.1	C_PAX4	34655	0.06104	10499	0.06387	10906	-0.05775	3.06701e-104
MEOX2_MA0706.1	MEOX2	MA0706.1	C_LHX5	43031	0.05075	11439	0.05297	11856	-0.0492	7.91911e-102
MNX1_MA0707.2	MNX1	MA0707.2	C_MNX1	38490	0.05117	9872	0.05325	10281	-0.04438	9.76636e-93
MSX2_MA0708.2	MSX2	MA0708.2	C_DLX6	46789	0.06607	14129	0.06811	14577	-0.03616	4.27517e-93
Msx3_MA0709.1	Msx3	MA0709.1	C_DLX6	39206	0.06834	12211	0.07036	12605	-0.03644	1.04786e-87
NOTO_MA0710.1	NOTO	MA0710.1	C_EMX2	37175	0.0687	12283	0.07203	12702	-0.05179	2.35188e-104
OTX1_MA0711.1	OTX1	MA0711.1	C_OTX2	31179	0.06226	11091	0.06149	10929	0.03293	6.33703e-82
OTX2_MA0712.2	OTX2	MA0712.2	C_OTX2	63271	0.05804	21435	0.05805	21309	0.01173	6.21132e-48
PHOX2A_MA0713.1	PHOX2A	MA0713.1	C_PHOX2A	44893	0.04092	8963	0.04268	9583	-0.05988	8.2997e-112
PITX3_MA0714.1	PITX3	MA0714.1	C_OTX2	47965	0.06249	16829	0.06275	16784	0.01313	1.8826e-50
PROP1_MA0715.1	PROP1	MA0715.1	C_PHOX2A	51834	0.03739	9165	0.03936	9912	-0.07501	6.2824e-125
PRRX1_MA0716.1	PRRX1	MA0716.1	C_PAX4	35593	0.06531	10558	0.06736	10851	-0.04534	9.07705e-90
RAX2_MA0717.1	RAX2	MA0717.1	C_PAX4	35593	0.06531	10558	0.06736	10851	-0.04534	9.07705e-90
RAX_MA0718.1	RAX	MA0718.1	C_GBX2	34222	0.0662	10348	0.06846	10720	-0.03947	4.73031e-91
RHOXF1_MA0719.1	RHOXF1	MA0719.1	C_OTX2	58274	0.06434	21485	0.06359	21161	0.03196	1.33407e-86
Shox2_MA0720.1	Shox2	MA0720.1	C_PAX4	35593	0.06531	10558	0.06736	10851	-0.04534	9.07705e-90
UNCX_MA0721.1	UNCX	MA0721.1	C_PAX4	35593	0.06531	10558	0.06736	10851	-0.04534	9.07705e-90
VAX1_MA0722.1	VAX1	MA0722.1	C_ESX1	38164	0.05269	10118	0.05512	10628	-0.05265	1.64057e-102
VAX2_MA0723.2	VAX2	MA0723.2	C_ESX1	25933	0.07582	8882	0.07849	9161	-0.05237	6.93869e-90
VENTX_MA0724.1	VENTX	MA0724.1	C_VENTX	23856	0.06926	7810	0.072	8030	-0.03055	1.05927e-73
VSX1_MA0725.1	VSX1	MA0725.1	C_PAX4	39571	0.05402	10685	0.0566	11224	-0.05858	2.60367e-109
VSX2_MA0726.1	VSX2	MA0726.1	C_PAX4	39571	0.05402	10685	0.0566	11224	-0.05858	2.60367e-109
NR3C2_MA0727.1	NR3C2	MA0727.1	C_Ar	46422	0.0849	19618	0.09995	20731	-0.15946	8.98365e-153
Nr2F6_MA0728.1	Nr2F6	MA0728.1	C_Nr2F6	83970	0.07114	33080	0.07049	32855	0.03513	4.4712e-105
RARA_MA0729.1	RARA	MA0729.1	C_RARA	77694	0.06569	28497	0.06555	28583	0.01641	5.88285e-67
RARA_MA0730.1	RARA	MA0730.1	C_RARA	76882	0.088	35305	0.08658	34425	0.05256	1.10639e-112
BCL6B_MA0731.1	BCL6B	MA0731.1	C_BCL6B	88286	0.06242	30116	0.06388	30654	-0.01801	4.92317e-77
EGR3_MA0732.1	EGR3	MA0732.1	C_EGR1	103427	0.13923	56179	0.12485	52364	0.23949	7.20749e-196
EGR4_MA0733.1	EGR4	MA0733.1	C_EGR1	119360	0.1322	63909	0.12027	60063	0.2025	3.79681e-185
Gli2_MA0734.3	Gli2	MA0734.3	C_Gli2	126996	0.10272	63658	0.09844	61036	0.11324	3.64179e-157
GLIS1_MA0735.1	GLIS1	MA0735.1	C_GLIS1	42001	0.10734	20933	0.10117	19957	0.13952	1.4934e-146
GLIS2_MA0736.1	GLIS2	MA0736.1	C_GLIS2	76587	0.1171	41380	0.10832	38877	0.17872	3.04448e-172
GLIS3_MA0737.1	GLIS3	MA0737.1	C_GLIS2	60585	0.10083	29288	0.09654	28157	0.10476	7.55342e-144
HIC2_MA0738.1	HIC2	MA0738.1	C_HIC2	87757	0.10059	42357	0.10052	41278	0.05947	4.86857e-132
Hic1_MA0739.1	Hic1	MA0739.1	C_Hic1	94577	0.0971	43705	0.09931	43095	0.01785	1.33069e-79
KLF14_MA0740.2	KLF14	MA0740.2	C_KLF4	250834	0.15938	142135	0.1459	135694	0.18039	1.7576e-200
KLF16_MA0741.1	KLF16	MA0741.1	C_KLF9	228030	0.15611	128131	0.14236	121684	0.19298	1.76217e-196
KLF12_MA0742.2	KLF12	MA0742.2	C_PATZ1	222290	0.17425	132391	0.1571	125182	0.22657	9.47074e-202
SCRT1_MA0743.2	SCRT1	MA0743.2	C_SCRT2	72824	0.07249	29758	0.07354	29156	0.0295	2.379e-91
SCRT2_MA0744.2	SCRT2	MA0744.2	C_SCRT2	77883	0.07617	32466	0.07722	31987	0.02227	6.63953e-80
SNAI2_MA0745.2	SNAI2	MA0745.2	C_ASCL1	117950	0.06506	48572	0.0643	46244	0.08201	1.40413e-140
SP3_MA0746.2	SP3	MA0746.2	C_KLF9	191248	0.17538	110682	0.15838	105239	0.21139	6.22709e-194
SP8_MA0747.1	SP8	MA0747.1	C_KLF9	200750	0.14855	110175	0.13591	104809	0.18226	2.68397e-187
YY2_MA0748.2	YY2	MA0748.2	C_YY2	35810	0.15974	20924	0.1456	19762	0.22833	7.39289e-162
ZBED1_MA0749.1	ZBED1	MA0749.1	C_ZBED1	5960	0.10235	2443	0.09895	2400	0.03873	2.91518e-46
ZBTB7A_MA0750.2	ZBTB7A	MA0750.2	C_ETS1	91367	0.15213	50884	0.14193	49553	0.12416	5.52252e-157
ZIC4_MA0751.1	ZIC4	MA0751.1	C_ZIC5	99486	0.12941	56189	0.12106	53487	0.15921	1.21067e-169
ZNF410_MA0752.1	ZNF410	MA0752.1	C_ZNF410	46835	0.05983	14427	0.06027	14660	0.00691	1.25229e-30
ZNF740_MA0753.2	ZNF740	MA0753.2	C_ZNF740	206416	0.13012	112705	0.12027	106573	0.1761	9.01014e-194
CUX1_MA0754.2	CUX1	MA0754.2	C_ONECUT1	15625	0.04529	3635	0.04556	3825	-0.02741	2.03701e-57
CUX2_MA0755.1	CUX2	MA0755.1	C_ONECUT1	13738	0.04489	3265	0.04507	3382	-0.02626	3.3077e-47
ONECUT2_MA0756.2	ONECUT2	MA0756.2	C_ONECUT2	11221	0.05969	3359	0.05971	3399	0.00126	0.156301
ONECUT3_MA0757.1	ONECUT3	MA0757.1	C_ONECUT1	66027	0.03889	12875	0.04006	13485	-0.04699	8.19385e-109
E2F7_MA0758.1	E2F7	MA0758.1	C_E2F7	39854	0.0757	14148	0.07672	14392	-0.01263	3.75378e-49
ELK3_MA0759.2	ELK3	MA0759.2	C_ETS1	26842	0.233	16517	0.21205	16135	0.17832	3.97582e-151
ERF_MA0760.1	ERF	MA0760.1	C_ETS1	41310	0.14559	20744	0.13821	20616	0.05921	2.64947e-110
ETV1_MA0761.2	ETV1	MA0761.2	C_Erg	185755	0.09444	83893	0.09347	83959	0.01583	2.93356e-82
ETV2_MA0762.1	ETV2	MA0762.1	C_ETS1	51133	0.11829	23048	0.11449	23170	0.01973	5.72256e-68
ETV3_MA0763.1	ETV3	MA0763.1	C_ETS1	30425	0.17151	16001	0.15999	15910	0.08298	4.41852e-115
ETV4_MA0764.3	ETV4	MA0764.3	C_ETS1	30955	0.21002	18284	0.19286	17917	0.14691	1.16761e-144
ETV5_MA0765.3	ETV5	MA0765.3	C_ETS1	27298	0.21173	15996	0.19468	15740	0.13468	1.10462e-139
GATA5_MA0766.2	GATA5	MA0766.2	C_Gata3	41811	0.0596	13974	0.06106	14381	-0.02287	5.3596e-66
GCM2_MA0767.1	GCM2	MA0767.1	C_GCM2	41396	0.08888	18527	0.08501	17924	0.10073	2.51049e-131
Lef1_MA0768.2	Lef1	MA0768.2	C_Lef1	109937	0.06882	39123	0.07107	39644	-0.01944	3.80545e-83
TCF7_MA0769.2	TCF7	MA0769.2	C_Lef1	87573	0.06138	28557	0.06377	29504	-0.03424	1.65501e-103
HSF2_MA0770.1	HSF2	MA0770.1	C_HSF4	67665	0.06226	22193	0.06402	22551	-0.01778	4.0579e-74
HSF4_MA0771.1	HSF4	MA0771.1	C_HSF4	59665	0.06974	21502	0.07149	21844	-0.01866	9.35547e-69
IRF7_MA0772.1	IRF7	MA0772.1	C_IRF7	88912	0.05254	23656	0.05497	24874	-0.07019	9.50549e-136
MEF2D_MA0773.1	MEF2D	MA0773.1	C_MEF2A	77558	0.04564	17128	0.04698	17740	-0.02341	1.68142e-80
MEIS2_MA0774.1	MEIS2	MA0774.1	C_MEIS2	107995	0.08471	45001	0.08489	44801	0.02419	1.89817e-92
MEIS3_MA0775.1	MEIS3	MA0775.1	C_MEIS2	87611	0.0827	35889	0.08257	35707	0.02663	5.91998e-90
MYBL1_MA0776.1	MYBL1	MA0776.1	C_MYBL1	10943	0.0723	4226	0.07143	4189	0.00965	9.02206e-14
MYBL2_MA0777.1	MYBL2	MA0777.1	C_MYBL2	10820	0.07866	4146	0.07886	4214	0.00081	0.813864
NFKB2_MA0778.1	NFKB2	MA0778.1	C_NFKB2	37755	0.101	18828	0.09615	18105	0.10113	6.6679e-134
PAX1_MA0779.1	PAX1	MA0779.1	C_PAX9	30834	0.09783	14019	0.09518	13917	0.05643	1.84398e-98
PAX3_MA0780.1	PAX3	MA0780.1	C_Pax7	20308	0.04303	4173	0.04539	4388	-0.05179	7.46627e-90
PAX9_MA0781.1	PAX9	MA0781.1	C_PAX9	35149	0.09635	16004	0.09389	15811	0.05546	7.3622e-103
PKNOX1_MA0782.2	PKNOX1	MA0782.2	C_PBX3	112042	0.09087	47844	0.09043	47469	0.02386	1.03912e-99
PKNOX2_MA0783.1	PKNOX2	MA0783.1	C_TGIF2LX	83250	0.07223	32979	0.073	32668	0.02376	9.26058e-86
POU1F1_MA0784.2	POU1F1	MA0784.2	C_POU1F1	78240	0.05014	18299	0.05311	19455	-0.05418	1.68537e-124
POU2F1_MA0785.1	POU2F1	MA0785.1	C_POU1F1	80701	0.05099	18826	0.0539	19848	-0.04792	9.03171e-117
POU3F1_MA0786.1	POU3F1	MA0786.1	C_POU1F1	91471	0.04643	19517	0.04888	20688	-0.0488	6.81661e-117
POU3F2_MA0787.1	POU3F2	MA0787.1	C_POU1F1	85615	0.04883	19173	0.05171	20333	-0.05423	1.7299e-119
POU3F3_MA0788.1	POU3F3	MA0788.1	C_POU1F1	86776	0.0454	17768	0.04786	18865	-0.05777	5.94688e-125
POU3F4_MA0789.1	POU3F4	MA0789.1	C_POU1F1	76672	0.05309	19270	0.05571	20247	-0.04144	6.64747e-106
POU4F1_MA0790.1	POU4F1	MA0790.1	C_POU4F2	75292	0.04113	14897	0.04332	15804	-0.0558	2.66927e-125
POU4F3_MA0791.1	POU4F3	MA0791.1	C_POU4F2	70925	0.04233	14258	0.04464	15102	-0.05699	1.44959e-117
POU5F1B_MA0792.1	POU5F1B	MA0792.1	C_POU1F1	77404	0.05386	19341	0.05687	20325	-0.04474	1.18464e-115
POU6F2_MA0793.1	POU6F2	MA0793.1	C_POU6F2	55156	0.05948	16981	0.06205	17521	-0.04613	1.44911e-104
PROX1_MA0794.1	PROX1	MA0794.1	C_PROX1	28434	0.07691	10625	0.07685	10753	0.00248	0.000696936
SMAD3_MA0795.1	SMAD3	MA0795.1	C_SMAD3	28576	0.0803	11955	0.08033	12019	0.00556	1.06858e-13
TGIF1_MA0796.1	TGIF1	MA0796.1	C_TGIF2LX	73366	0.0709	28541	0.07184	28334	0.01707	1.98838e-68
TGIF2_MA0797.1	TGIF2	MA0797.1	C_TGIF2LX	71498	0.07361	28473	0.0744	28139	0.02356	9.88191e-77
RFX3_MA0798.3	RFX3	MA0798.3	C_RFX3	43601	0.09837	18325	0.0975	18090	0.03263	1.09086e-85
RFX4_MA0799.2	RFX4	MA0799.2	C_RFX4	31636	0.10732	14982	0.10653	14850	0.04032	2.98906e-86
EOMES_MA0800.1	EOMES	MA0800.1	C_TBX18	67986	0.05831	23155	0.05806	22870	0.02992	2.73697e-92
MGA_MA0801.1	MGA	MA0801.1	C_TBX4	59332	0.07003	23660	0.06861	23100	0.06239	1.19622e-117
TBR1_MA0802.1	TBR1	MA0802.1	C_TBX18	70428	0.05637	23651	0.05615	23471	0.02974	5.665e-97
TBX15_MA0803.1	TBX15	MA0803.1	C_TBX4	86385	0.06656	33857	0.06431	32492	0.08909	2.63981e-143
TBX19_MA0804.1	TBX19	MA0804.1	C_TBXT	34052	0.05872	11601	0.05907	11755	0.00674	6.06635e-21
TBX1_MA0805.1	TBX1	MA0805.1	C_TBX4	65925	0.06303	24759	0.06211	24188	0.05408	5.39247e-111
TBX4_MA0806.1	TBX4	MA0806.1	C_TBX4	65925	0.06303	24758	0.06211	24187	0.05414	4.83091e-111
TBX5_MA0807.1	TBX5	MA0807.1	C_TBX4	88088	0.06273	33922	0.06058	32511	0.0898	2.15949e-144
TEAD3_MA0808.1	TEAD3	MA0808.1	C_TEAD4	61385	0.07085	22767	0.07305	23261	-0.02017	5.06427e-68
TEAD4_MA0809.2	TEAD4	MA0809.2	C_TEAD4	96624	0.06926	35613	0.07093	36102	-0.00393	3.70934e-23
TFAP2A_MA0810.1	TFAP2A	MA0810.1	C_TFAP2A	99966	0.12514	55212	0.11572	52241	0.17936	1.08284e-177
TFAP2B_MA0811.1	TFAP2B	MA0811.1	C_TFAP2A	83727	0.11895	44775	0.11168	42712	0.14635	7.16211e-159
TFAP2B_MA0812.1	TFAP2B	MA0812.1	C_TFAP2C	78534	0.11749	41947	0.10999	39899	0.14778	1.42996e-161
TFAP2B_MA0813.1	TFAP2B	MA0813.1	C_TFAP2A	73718	0.128	40895	0.11988	38905	0.15257	1.11248e-159
TFAP2C_MA0814.2	TFAP2C	MA0814.2	C_TFAP2C	145845	0.12184	79918	0.11346	75909	0.16054	1.37652e-179
TFAP2C_MA0815.1	TFAP2C	MA0815.1	C_TFAP2A	65909	0.13023	36868	0.12115	34957	0.16906	9.4424e-164
Ascl2_MA0816.1	Ascl2	MA0816.1	C_Tcf12	140925	0.1008	66795	0.10518	66903	-0.01021	3.81684e-57
BHLHE23_MA0817.1	BHLHE23	MA0817.1	C_ATOH7	34336	0.04386	8673	0.04394	8802	0.00607	2.51381e-23
BHLHE22_MA0818.2	BHLHE22	MA0818.2	C_ATOH7	27475	0.04562	7346	0.04539	7400	0.02315	2.22312e-60
CLOCK_MA0819.2	CLOCK	MA0819.2	C_MYC	43019	0.08298	18502	0.08189	18212	0.04595	1.15444e-99
FIGLA_MA0820.1	FIGLA	MA0820.1	C_Rbpjl	104134	0.06902	42696	0.06938	41280	0.05621	6.03993e-131
HES5_MA0821.2	HES5	MA0821.2	C_MYC	27611	0.10926	13899	0.10247	13302	0.13812	6.15304e-135
HES7_MA0822.1	HES7	MA0822.1	C_HES7	31562	0.09964	15230	0.09764	14772	0.07722	9.08652e-112
HEY1_MA0823.1	HEY1	MA0823.1	C_MYC	31945	0.11588	16267	0.11005	15660	0.11232	2.19229e-131
MNT_MA0825.1	MNT	MA0825.1	C_MYC	33056	0.11226	16372	0.10871	15972	0.07348	3.03014e-118
OLIG1_MA0826.1	OLIG1	MA0826.1	C_ATOH7	31756	0.04599	8405	0.04668	8585	0.00479	9.91814e-15
OLIG3_MA0827.1	OLIG3	MA0827.1	C_ATOH7	39158	0.04625	10047	0.04679	10293	-0.00068	0.032614
SREBF2_MA0828.2	SREBF2	MA0828.2	C_SREBF2	17845	0.11687	7950	0.11263	7872	0.04438	5.14019e-74
SREBF1_MA0829.2	SREBF1	MA0829.2	C_SREBF2	42239	0.08497	16971	0.08298	16835	0.0471	1.06923e-101
TCF4_MA0830.2	TCF4	MA0830.2	C_ASCL1	145256	0.08819	67532	0.08605	64591	0.09772	5.54633e-158
TFE3_MA0831.3	TFE3	MA0831.3	C_BHLHE41	28649	0.12929	14254	0.12503	14091	0.05561	3.87142e-102
Tcf21_MA0832.1	Tcf21	MA0832.1	C_Tcf21	72413	0.08993	31442	0.09491	31896	-0.03487	2.35311e-94
ATF4_MA0833.2	ATF4	MA0833.2	C_CEBPG	52724	0.06169	15799	0.06263	16368	-0.02906	4.2408e-84
ATF7_MA0834.1	ATF7	MA0834.1	C_FOSL1::JUN	21735	0.13713	9948	0.12939	9745	0.07699	2.32398e-108
BATF3_MA0835.2	BATF3	MA0835.2	C_FOSL1::JUN	89725	0.06588	29885	0.06498	29970	0.03475	4.79236e-105
CEBPD_MA0836.2	CEBPD	MA0836.2	C_CEBPB	48975	0.06643	15965	0.06901	16546	-0.04443	1.34026e-105
CEBPE_MA0837.2	CEBPE	MA0837.2	C_CEBPB	7697	0.09589	2992	0.09706	2999	-0.028	2.88284e-45
CEBPG_MA0838.1	CEBPG	MA0838.1	C_CEBPB	14604	0.08451	5341	0.08643	5411	-0.02954	5.99241e-54
CREB3L1_MA0839.1	CREB3L1	MA0839.1	C_CREB3L4	36391	0.10281	16896	0.09914	16511	0.06636	2.23198e-113
Creb5_MA0840.1	Creb5	MA0840.1	C_FOSL1::JUN	29704	0.12038	12484	0.1147	12397	0.05475	8.32588e-103
NFE2_MA0841.1	NFE2	MA0841.1	C_NFE2	55321	0.06439	18160	0.06389	18156	0.0359	7.8725e-95
NRL_MA0842.2	NRL	MA0842.2	C_MAFF	62171	0.07244	23164	0.07424	23661	-0.02622	1.52694e-85
TEF_MA0843.1	TEF	MA0843.1	C_NFIL3	23743	0.0591	6369	0.05969	6555	-0.00882	4.66482e-27
XBP1_MA0844.1	XBP1	MA0844.1	C_XBP1	22887	0.11088	10628	0.10598	10404	0.06412	2.63864e-97
FOXB1_MA0845.1	FOXB1	MA0845.1	C_FOXC2	100909	0.04094	21863	0.04207	22637	-0.03169	1.3843e-104
FOXC2_MA0846.1	FOXC2	MA0846.1	C_FOXC2	139737	0.04547	32589	0.0476	34082	-0.05795	9.27036e-132
FOXD2_MA0847.3	FOXD2	MA0847.3	C_FOXE1	126936	0.04941	33307	0.05166	34527	-0.05467	5.34804e-138
FOXO4_MA0848.1	FOXO4	MA0848.1	C_FOXN3	48756	0.07014	16883	0.07435	17719	-0.07118	5.85901e-123
FOXO6_MA0849.1	FOXO6	MA0849.1	C_FOXN3	48756	0.07014	16883	0.07435	17719	-0.07118	5.85901e-123
FOXP3_MA0850.1	FOXP3	MA0850.1	C_FOXN3	48756	0.07014	16883	0.07435	17719	-0.07118	5.85901e-123
Foxj3_MA0851.1	Foxj3	MA0851.1	C_FOXN3	108256	0.05267	28994	0.05535	30122	-0.06168	1.14049e-134
FOXK1_MA0852.2	FOXK1	MA0852.2	C_FOXN3	73463	0.07169	25763	0.07601	26934	-0.07171	9.39526e-132
Alx4_MA0853.1	Alx4	MA0853.1	C_Alx1	29058	0.05719	8299	0.05935	8651	-0.05357	1.12968e-100
Alx1_MA0854.1	Alx1	MA0854.1	C_Alx1	30791	0.05657	8521	0.05891	8886	-0.05207	1.41117e-99
RXRB_MA0855.1	RXRB	MA0855.1	C_NR2C2	83038	0.07355	34239	0.07209	33786	0.04428	3.28045e-113
RXRG_MA0856.1	RXRG	MA0856.1	C_NR2C2	80290	0.07218	32738	0.07087	32343	0.04165	2.91134e-117
Rarb_MA0857.1	Rarb	MA0857.1	C_Nr2F6	83671	0.06641	31014	0.0664	30928	0.02243	1.07571e-85
Rarb_MA0858.1	Rarb	MA0858.1	C_RARA	72299	0.07951	30791	0.07909	30274	0.03182	3.43411e-98
Rarg_MA0859.1	Rarg	MA0859.1	C_Nr2F6	76262	0.06781	28705	0.06771	28612	0.02508	1.88689e-89
Rarg_MA0860.1	Rarg	MA0860.1	C_Rarg	83063	0.08409	36992	0.08361	36678	0.02797	3.9536e-87
TP73_MA0861.1	TP73	MA0861.1	C_TP73	45496	0.07643	17927	0.07568	17763	0.0377	4.4604e-92
GMEB2_MA0862.1	GMEB2	MA0862.1	C_GMEB2	5727	0.10852	2232	0.10405	2205	0.0475	2.03554e-58
MTF1_MA0863.1	MTF1	MA0863.1	C_MTF1	53992	0.09736	25935	0.09648	25529	0.04392	1.77712e-100
E2F2_MA0864.2	E2F2	MA0864.2	C_ZNF417	8876	0.17377	5310	0.16717	5173	0.10978	1.32494e-102
E2F8_MA0865.2	E2F8	MA0865.2	C_E2F8	22589	0.15736	12706	0.14601	12190	0.16181	1.01924e-140
SOX21_MA0866.1	SOX21	MA0866.1	C_SOX21	66946	0.06217	20255	0.06574	21242	-0.05893	9.90023e-125
SOX4_MA0867.2	SOX4	MA0867.2	C_SOX4	120443	0.10488	49196	0.11274	51148	-0.09065	6.5498e-156
SOX8_MA0868.2	SOX8	MA0868.2	C_Sox17	66918	0.09893	25290	0.10655	26528	-0.09034	2.10945e-139
Sox11_MA0869.2	Sox11	MA0869.2	C_SOX4	162961	0.09432	65138	0.10148	67682	-0.08265	1.30503e-150
Sox1_MA0870.1	Sox1	MA0870.1	C_SOX21	54693	0.06421	17191	0.06757	18008	-0.05104	5.68202e-112
TFEC_MA0871.2	TFEC	MA0871.2	C_MYC	46085	0.12128	22871	0.11676	22428	0.06887	1.43074e-121
TFAP2A_MA0872.1	TFAP2A	MA0872.1	C_TFAP2A	69699	0.13263	39402	0.12383	37360	0.16685	2.69282e-171
HOXD12_MA0873.1	HOXD12	MA0873.1	C_HOXC10	18969	0.05156	5004	0.05296	5090	-0.03127	4.83438e-65
Arx_MA0874.1	Arx	MA0874.1	C_Alx1	27634	0.0584	7709	0.06116	8000	-0.05295	2.2191e-97
BARX1_MA0875.1	BARX1	MA0875.1	C_TLX2	38168	0.06972	12513	0.07221	12933	-0.04098	6.1033e-93
BSX_MA0876.1	BSX	MA0876.1	C_DLX6	37252	0.07522	13041	0.07672	13218	-0.02187	8.57271e-62
BARHL1_MA0877.3	BARHL1	MA0877.3	C_BARHL1	10224	0.06497	3562	0.06559	3654	-0.02736	3.22014e-49
CDX1_MA0878.3	CDX1	MA0878.3	C_HOXA10	55576	0.05079	14254	0.05267	14782	-0.04143	6.13826e-102
DLX1_MA0879.2	DLX1	MA0879.2	C_Dlx2	44156	0.06527	13453	0.06747	13893	-0.0426	6.07161e-94
Dlx3_MA0880.1	Dlx3	MA0880.1	C_DLX6	29877	0.06252	8690	0.06466	8990	-0.03398	1.62457e-79
Dlx4_MA0881.1	Dlx4	MA0881.1	C_DLX6	29877	0.06252	8690	0.06466	8990	-0.03398	1.62457e-79
DLX6_MA0882.1	DLX6	MA0882.1	C_DLX6	30346	0.06435	9336	0.06688	9703	-0.04316	4.03965e-87
Dmbx1_MA0883.1	Dmbx1	MA0883.1	C_Dmbx1	29853	0.06277	9771	0.06377	10049	-0.03108	1.33948e-72
DUXA_MA0884.2	DUXA	MA0884.2	C_DUXA	25493	0.04917	6458	0.05116	6728	-0.05189	2.24759e-94
Dlx2_MA0885.2	Dlx2	MA0885.2	C_Dlx2	47770	0.06067	14188	0.06345	14733	-0.05167	4.08203e-109
EMX2_MA0886.1	EMX2	MA0886.1	C_EMX2	25143	0.06499	7916	0.0682	8215	-0.06068	1.52899e-98
EVX1_MA0887.1	EVX1	MA0887.1	C_EVX2	26971	0.07163	9373	0.07462	9705	-0.04966	1.57922e-95
EVX2_MA0888.1	EVX2	MA0888.1	C_EVX2	27055	0.0717	9543	0.07436	9861	-0.04453	3.63757e-87
GBX1_MA0889.1	GBX1	MA0889.1	C_GBX2	27717	0.07778	9415	0.08033	9720	-0.04292	9.48271e-90
GBX2_MA0890.1	GBX2	MA0890.1	C_GBX2	34795	0.07366	11486	0.07612	11805	-0.03944	2.20122e-85
GSC2_MA0891.1	GSC2	MA0891.1	C_OTX2	44642	0.0612	15702	0.06107	15552	0.01802	1.92489e-65
GSX1_MA0892.1	GSX1	MA0892.1	C_PAX4	41513	0.06431	12803	0.06651	13245	-0.04836	4.63412e-105
GSX2_MA0893.2	GSX2	MA0893.2	C_ESX1	39167	0.07118	13719	0.07393	14235	-0.04574	1.31338e-93
HESX1_MA0894.1	HESX1	MA0894.1	C_GBX2	32229	0.06896	10180	0.07108	10482	-0.03786	4.53343e-88
HMBOX1_MA0895.1	HMBOX1	MA0895.1	C_HMBOX1	30684	0.06204	10027	0.0628	10346	-0.02762	4.06441e-68
Hmx1_MA0896.1	Hmx1	MA0896.1	C_Hmx3	42099	0.05828	12598	0.06021	13047	-0.03239	4.02699e-85
Hmx2_MA0897.1	Hmx2	MA0897.1	C_Hmx3	50568	0.05149	13266	0.05345	13804	-0.0429	6.91515e-102
Hmx3_MA0898.1	Hmx3	MA0898.1	C_Hmx3	50845	0.04962	13011	0.05144	13455	-0.03822	1.46967e-92
HOXA10_MA0899.1	HOXA10	MA0899.1	C_HOXA10	69890	0.04464	16122	0.0463	16775	-0.04461	1.22699e-109
HOXA2_MA0900.2	HOXA2	MA0900.2	C_ESX1	16857	0.06529	5388	0.06859	5633	-0.06322	2.96987e-94
HOXB13_MA0901.2	HOXB13	MA0901.2	C_HOXB13	105184	0.04151	21020	0.04302	21946	-0.05206	2.2117e-128
HOXB2_MA0902.2	HOXB2	MA0902.2	C_ESX1	23668	0.0661	7761	0.06921	8094	-0.05567	1.99619e-95
HOXB3_MA0903.1	HOXB3	MA0903.1	C_EMX2	42195	0.07127	14269	0.07414	14738	-0.04181	1.27622e-92
HOXB5_MA0904.2	HOXB5	MA0904.2	C_ESX1	16857	0.06529	5388	0.06859	5633	-0.0632	3.06157e-94
HOXC10_MA0905.1	HOXC10	MA0905.1	C_HOXC10	33468	0.04664	8017	0.04814	8293	-0.03597	2.77391e-88
HOXC12_MA0906.1	HOXC12	MA0906.1	C_HOXC10	23837	0.05027	6230	0.0517	6402	-0.03683	1.015e-83
HOXC13_MA0907.1	HOXC13	MA0907.1	C_HOXC13	37768	0.05533	10681	0.05754	11130	-0.04573	1.90287e-101
HOXD11_MA0908.1	HOXD11	MA0908.1	C_HOXC10	23667	0.04808	5778	0.04965	5981	-0.03452	1.53628e-71
Hoxd13_MA0909.3	Hoxd13	MA0909.3	C_CDX2	67742	0.05205	16573	0.054	17429	-0.04634	6.43827e-111
HOXD8_MA0910.2	HOXD8	MA0910.2	C_HOXB8	40531	0.05975	12833	0.06151	13270	-0.03205	4.33139e-85
Hoxa11_MA0911.1	Hoxa11	MA0911.1	C_HOXC10	21330	0.05113	5589	0.05235	5722	-0.02549	2.24615e-59
HOXD3_MA0912.2	HOXD3	MA0912.2	C_ESX1	40565	0.06064	12536	0.06286	12981	-0.04429	1.21469e-94
HOXD9_MA0913.2	HOXD9	MA0913.2	C_HOXA10	58953	0.04613	14162	0.04801	14905	-0.04947	9.34298e-113
ISL2_MA0914.1	ISL2	MA0914.1	C_ISL2	47914	0.06256	16650	0.06383	16967	-0.02182	4.55757e-71
HES1_MA1099.2	HES1	MA1099.2	C_MYC	35770	0.14858	20452	0.1333	19387	0.22453	1.72849e-163
ASCL1_MA1100.2	ASCL1	MA1100.2	C_Tcf12	109165	0.10607	54045	0.11028	53477	0.00555	2.55691e-32
BACH2_MA1101.2	BACH2	MA1101.2	C_NFE2	52782	0.06539	17716	0.06433	17729	0.03524	3.65449e-90
CTCFL_MA1102.2	CTCFL	MA1102.2	C_CTCFL	143165	0.15557	85778	0.1458	81878	0.16816	1.05016e-175
FOXK2_MA1103.2	FOXK2	MA1103.2	C_FOXN3	73265	0.063	23403	0.06676	24511	-0.06922	1.89926e-124
GATA6_MA1104.2	GATA6	MA1104.2	C_Gata3	59714	0.0477	15900	0.04877	16530	-0.03223	1.86272e-90
GRHL2_MA1105.2	GRHL2	MA1105.2	C_GRHL2	76105	0.06385	26892	0.06553	27356	-0.02034	1.89512e-73
HIF1A_MA1106.1	HIF1A	MA1106.1	C_ARNT::HIF1A	24332	0.10385	12070	0.10104	11724	0.07415	6.73665e-109
KLF9_MA1107.2	KLF9	MA1107.2	C_KLF9	284622	0.11625	146220	0.10755	139127	0.15966	1.66643e-192
MXI1_MA1108.2	MXI1	MA1108.2	C_MXI1	125352	0.0692	49483	0.06911	49246	0.02323	2.21271e-91
NEUROD1_MA1109.1	NEUROD1	MA1109.1	C_Neurod2	157141	0.09103	69195	0.09426	69158	-0.00287	9.07293e-19
Nr1H4_MA1110.2	Nr1H4	MA1110.2	C_Nr1H2	105718	0.08444	49324	0.08307	48461	0.04731	5.34575e-116
NR2F2_MA1111.1	NR2F2	MA1111.1	C_Nr1H2	82963	0.07085	34019	0.0705	33765	0.02982	4.28353e-101
NR4A1_MA1112.2	NR4A1	MA1112.2	C_NR4A1	104692	0.06754	37316	0.06898	37681	-0.0079	1.88968e-50
PBX2_MA1113.2	PBX2	MA1113.2	C_MEIS2	59641	0.0459	13735	0.0471	14324	-0.03399	2.71073e-93
PBX3_MA1114.1	PBX3	MA1114.1	C_PBX3	135325	0.09897	62088	0.0979	61067	0.04196	8.9542e-118
POU5F1_MA1115.1	POU5F1	MA1115.1	C_POU2F3	98310	0.05449	26163	0.05705	27303	-0.04321	9.84789e-119
RBPJ_MA1116.1	RBPJ	MA1116.1	C_RBPJ	172193	0.08649	73344	0.08756	73104	0.01264	1.13195e-72
RELB_MA1117.1	RELB	MA1117.1	C_RELB	67850	0.08877	29585	0.08767	29341	0.03951	2.63483e-103
SIX1_MA1118.1	SIX1	MA1118.1	C_SIX1	62195	0.06037	20723	0.06078	21192	-0.00574	1.71172e-24
SIX2_MA1119.1	SIX2	MA1119.1	C_SIX2	80740	0.06419	28419	0.06503	28888	-0.01276	9.03592e-58
SOX13_MA1120.1	SOX13	MA1120.1	C_SOX13	72879	0.1056	30054	0.11192	31097	-0.06441	1.49755e-131
TEAD2_MA1121.1	TEAD2	MA1121.1	C_TEAD4	83114	0.07471	32298	0.07639	32646	-0.00144	1.66614e-05
TFDP1_MA1122.1	TFDP1	MA1122.1	C_E2F6	63921	0.17405	38673	0.1558	36626	0.25115	6.77633e-185
TWIST1_MA1123.2	TWIST1	MA1123.2	C_TWIST1	127669	0.07883	52721	0.08161	52999	-0.00713	1.43882e-39
ZNF24_MA1124.1	ZNF24	MA1124.1	C_ZNF24	82360	0.06208	25595	0.06515	26789	-0.04234	1.33557e-109
ZNF384_MA1125.1	ZNF384	MA1125.1	C_ZNF384	219828	0.04163	46618	0.04305	48248	-0.0622	2.1402e-157
FOSJUN_MA1126.1	FOS::JUN	MA1126.1	C_FOSL1::JUN	36136	0.11214	15405	0.10739	15180	0.05087	2.88065e-97
FOSBJUN_MA1127.1	FOSB::JUN	MA1127.1	C_FOSL1::JUN	30570	0.12655	13489	0.12032	13287	0.06623	1.48039e-105
FOSL1JUN_MA1128.1	FOSL1::JUN	MA1128.1	C_FOSL1::JUN	77799	0.06996	26669	0.06832	26501	0.05228	3.18372e-119
FOSL1JUN_MA1129.1	FOSL1::JUN	MA1129.1	C_FOSL1::JUN	20385	0.13401	9087	0.12638	8914	0.07326	9.22241e-106
FOSL2JUN_MA1130.1	FOSL2::JUN	MA1130.1	C_FOSL1::JUN	70253	0.06999	24011	0.06842	23811	0.05504	4.95531e-115
FOSL2JUN_MA1131.1	FOSL2::JUN	MA1131.1	C_FOSL1::JUN	36698	0.12108	16052	0.11537	15882	0.05957	1.07016e-105
JUNJUNB_MA1132.1	JUN::JUNB	MA1132.1	C_FOSL1::JUN	60867	0.07149	20498	0.06977	20432	0.05159	1.71287e-109
JUNJUNB_MA1133.1	JUN::JUNB	MA1133.1	C_FOSL1::JUN	33837	0.12498	15537	0.11831	15189	0.07046	2.46613e-106
FOSJUNB_MA1134.1	FOS::JUNB	MA1134.1	C_FOSL1::JUN	65549	0.06799	22028	0.06644	21854	0.05279	2.12678e-111
FOSBJUNB_MA1135.1	FOSB::JUNB	MA1135.1	C_FOSL1::JUN	68463	0.06773	22977	0.06631	22826	0.05224	2.8107e-114
FOSBJUNB_MA1136.1	FOSB::JUNB	MA1136.1	C_FOSL1::JUN	22689	0.13032	9984	0.12324	9820	0.06875	1.58208e-105
FOSL1JUNB_MA1137.1	FOSL1::JUNB	MA1137.1	C_FOSL1::JUN	70272	0.06868	23769	0.06714	23675	0.052	2.53972e-118
FOSL2JUNB_MA1138.1	FOSL2::JUNB	MA1138.1	C_FOSL1::JUN	66573	0.06553	21528	0.06414	21476	0.0488	3.22417e-110
FOSL2JUNB_MA1139.1	FOSL2::JUNB	MA1139.1	C_FOSL1::JUN	23260	0.13197	10416	0.12464	10261	0.07096	2.32824e-111
JUNB_MA1140.2	JUNB	MA1140.2	C_FOSL1::JUN	23022	0.14314	10968	0.13536	10734	0.08212	1.19014e-110
FOSJUND_MA1141.1	FOS::JUND	MA1141.1	C_FOSL1::JUN	77052	0.07086	26672	0.06922	26502	0.0531	2.43976e-114
FOSL1JUND_MA1142.1	FOSL1::JUND	MA1142.1	C_FOSL1::JUN	70965	0.06754	23316	0.06608	23321	0.04848	3.00213e-119
FOSL1JUND_MA1143.1	FOSL1::JUND	MA1143.1	C_FOSL1::JUND	26499	0.1207	10880	0.11472	10749	0.05316	1.6859e-95
FOSL2JUND_MA1144.1	FOSL2::JUND	MA1144.1	C_FOSL1::JUN	66554	0.06801	22247	0.06647	22107	0.05344	2.06844e-116
FOSL2JUND_MA1145.1	FOSL2::JUND	MA1145.1	C_FOSL1::JUN	33139	0.12974	14965	0.12301	14765	0.06668	1.00089e-113
NR1H4RXRA_MA1146.1	NR1H4::RXRA	MA1146.1	C_NR2F1	41851	0.09003	18945	0.08893	18760	0.043	2.52033e-95
NR4A2RXRA_MA1147.1	NR4A2::RXRA	MA1147.1	C_NR2F1	39773	0.09459	18949	0.0918	18461	0.07054	4.01433e-114
PPARARXRA_MA1148.1	PPARA::RXRA	MA1148.1	C_PPARA::RXRA	87981	0.07823	37288	0.07663	36564	0.04847	1.08187e-118
RARARXRG_MA1149.1	RARA::RXRG	MA1149.1	C_RARA::RXRG	85824	0.10217	43477	0.09724	41542	0.1104	7.41185e-147
RORB_MA1150.1	RORB	MA1150.1	C_RORB	58594	0.07531	23002	0.076	23218	0.00329	1.10035e-15
RORC_MA1151.1	RORC	MA1151.1	C_RORB	56594	0.0738	21753	0.07447	21911	0.00056	0.37603
SOX15_MA1152.1	SOX15	MA1152.1	C_SOX15	128247	0.07734	41554	0.08314	43448	-0.08972	6.85849e-155
Smad4_MA1153.1	Smad4	MA1153.1	C_Smad4	59911	0.08322	25594	0.0843	25877	-0.00041	0.214994
ZNF282_MA1154.1	ZNF282	MA1154.1	C_ZNF282	77327	0.08184	32106	0.0816	32224	0.01537	8.03418e-64
ZSCAN4_MA1155.1	ZSCAN4	MA1155.1	C_ZSCAN4	160202	0.06765	63618	0.06759	62747	0.03943	3.22394e-122
IRF3_MA1418.1	IRF3	MA1418.1	C_IRF3	107879	0.06517	35411	0.0671	36674	-0.05401	1.89524e-132
IRF4_MA1419.1	IRF4	MA1419.1	C_Irf1	44223	0.06702	14919	0.06921	15585	-0.05337	1.36146e-109
IRF5_MA1420.1	IRF5	MA1420.1	C_IRF5	40455	0.07431	14923	0.07446	15200	-0.01889	3.21794e-60
TCF7L1_MA1421.1	TCF7L1	MA1421.1	C_TCF7L1	102856	0.06284	34499	0.06472	35305	-0.03338	3.65484e-102
ARGFX_MA1463.1	ARGFX	MA1463.1	C_ARGFX	40670	0.04849	9827	0.05073	10274	-0.05784	1.12091e-105
ARNT2_MA1464.1	ARNT2	MA1464.1	C_MYC	28469	0.12531	14544	0.12052	14250	0.07472	4.20632e-112
ATF6_MA1466.1	ATF6	MA1466.1	C_CREB3L4	34454	0.10407	16005	0.10032	15762	0.06092	6.53385e-107
Atoh1_MA1467.2	Atoh1	MA1467.2	C_Neurod2	132849	0.07916	53583	0.0824	53795	-0.01118	1.71201e-62
ATOH7_MA1468.1	ATOH7	MA1468.1	C_ATOH7	68916	0.05983	22842	0.0611	23115	-0.00269	1.03054e-09
BACH2_MA1470.1	BACH2	MA1470.1	C_BACH2	26897	0.08069	9246	0.08017	9425	-0.00824	6.06576e-29
BARX2_MA1471.1	BARX2	MA1471.1	C_BARX2	52559	0.04358	11176	0.04562	11769	-0.05413	2.93822e-110
Bhlha15_MA1472.2	Bhlha15	MA1472.2	C_Tcf12	107718	0.11329	54968	0.11841	54719	-0.01447	5.32976e-71
CDX4_MA1473.1	CDX4	MA1473.1	C_HOXA10	58677	0.0476	14319	0.04928	14982	-0.04396	2.89196e-104
CREB3L4_MA1474.1	CREB3L4	MA1474.1	C_CREB3L4	32740	0.13253	16825	0.124	16364	0.11497	1.11644e-130
CREB3L4_MA1475.1	CREB3L4	MA1475.1	C_FOSL1::JUN	17585	0.17779	9454	0.16441	9166	0.13187	7.47222e-122
Dlx5_MA1476.2	Dlx5	MA1476.2	C_Dlx2	46897	0.05882	13775	0.06164	14326	-0.05323	2.72605e-109
DMRTA2_MA1478.1	DMRTA2	MA1478.1	C_DMRTA1	48039	0.05176	12734	0.05397	13438	-0.05045	2.14416e-103
DMRTC2_MA1479.1	DMRTC2	MA1479.1	C_DMRTA1	54735	0.04874	13912	0.0506	14718	-0.04763	3.84878e-103
DPRX_MA1480.1	DPRX	MA1480.1	C_DPRX	31917	0.06752	11413	0.06808	11576	-0.00434	2.23416e-12
DRGX_MA1481.1	DRGX	MA1481.1	C_ESX1	25080	0.07874	8474	0.08131	8745	-0.05431	2.48471e-92
ELF2_MA1483.2	ELF2	MA1483.2	C_Erg	54434	0.13744	26683	0.13117	26663	0.03808	3.57456e-100
ETS2_MA1484.1	ETS2	MA1484.1	C_ETS1	46869	0.15645	25056	0.14771	24714	0.08166	1.1302e-122
FERD3L_MA1485.1	FERD3L	MA1485.1	C_FERD3L	81447	0.10035	38945	0.10135	38277	0.0347	2.81287e-101
FOXE1_MA1487.2	FOXE1	MA1487.2	C_FOXE1	141090	0.05075	37397	0.0534	38860	-0.0614	4.9101e-137
FOXN3_MA1489.1	FOXN3	MA1489.1	C_FOXN3	12965	0.07277	4317	0.07792	4550	-0.09113	6.8584e-102
GLI3_MA1491.2	GLI3	MA1491.2	C_GLI3	77898	0.09698	37511	0.09286	36119	0.10544	6.11657e-152
HES6_MA1493.1	HES6	MA1493.1	C_HES6	39775	0.09187	18108	0.09055	17684	0.05052	9.56429e-102
HNF4A_MA1494.1	HNF4A	MA1494.1	C_HNF4A	64811	0.07784	26556	0.07761	26453	0.02181	6.93228e-76
HOXA1_MA1495.1	HOXA1	MA1495.1	C_ESX1	16857	0.06529	5388	0.06859	5633	-0.0632	3.06157e-94
HOXA4_MA1496.1	HOXA4	MA1496.1	C_HOXD4	39596	0.06095	12674	0.06269	13181	-0.03019	9.46404e-77
HOXA6_MA1497.1	HOXA6	MA1497.1	C_HOXB7	32532	0.06359	10382	0.06628	10759	-0.03996	4.99806e-82
HOXA7_MA1498.2	HOXA7	MA1498.2	C_HOXB8	38051	0.06026	12063	0.06228	12442	-0.03132	2.12856e-80
HOXB4_MA1499.1	HOXB4	MA1499.1	C_HOXD4	39871	0.0515	10930	0.05318	11414	-0.03558	4.00195e-90
HOXB6_MA1500.1	HOXB6	MA1500.1	C_HOXB6	38165	0.05391	10942	0.05589	11344	-0.04068	8.95387e-93
HOXB7_MA1501.1	HOXB7	MA1501.1	C_HOXB7	33530	0.06402	10821	0.06659	11247	-0.04705	3.44246e-93
HOXB8_MA1502.1	HOXB8	MA1502.1	C_HOXB8	40531	0.05975	12833	0.06151	13270	-0.03206	4.20348e-85
HOXB9_MA1503.1	HOXB9	MA1503.1	C_HOXC10	25309	0.04788	6265	0.04912	6438	-0.02997	6.51202e-68
HOXC4_MA1504.1	HOXC4	MA1504.1	C_HOXD4	38332	0.06322	12372	0.06537	12896	-0.03643	1.27064e-87
HOXC8_MA1505.1	HOXC8	MA1505.1	C_LHX5	23488	0.05232	6517	0.05413	6757	-0.04059	6.60404e-88
HOXD10_MA1506.1	HOXD10	MA1506.1	C_HOXC10	24924	0.05135	6471	0.05254	6634	-0.03064	1.49128e-72
HOXD4_MA1507.1	HOXD4	MA1507.1	C_HOXD4	34694	0.05752	10508	0.05962	10977	-0.04144	4.40056e-87
IKZF1_MA1508.1	IKZF1	MA1508.1	C_IKZF1	211021	0.07809	84643	0.07922	86151	-0.0211	6.47686e-101
IRF6_MA1509.1	IRF6	MA1509.1	C_IRF6	13396	0.0845	5434	0.08339	5464	0.01556	9.43432e-33
KLF10_MA1511.2	KLF10	MA1511.2	C_KLF4	231095	0.16478	134357	0.14887	126971	0.2198	3.99789e-208
KLF11_MA1512.1	KLF11	MA1512.1	C_KLF9	179340	0.16003	100098	0.14483	94986	0.20272	4.97287e-193
KLF15_MA1513.1	KLF15	MA1513.1	C_PATZ1	164551	0.19554	103988	0.17141	96929	0.31248	4.93252e-212
KLF17_MA1514.1	KLF17	MA1514.1	C_KLF17	183720	0.1124	95042	0.10568	90478	0.14397	2.71053e-178
KLF2_MA1515.1	KLF2	MA1515.1	C_KLF9	173192	0.16232	98691	0.14586	93092	0.21979	1.01796e-194
KLF3_MA1516.1	KLF3	MA1516.1	C_KLF3	97950	0.17053	56171	0.15203	53442	0.22375	1.01351e-184
KLF6_MA1517.1	KLF6	MA1517.1	C_KLF9	135845	0.15718	75931	0.14166	71955	0.20433	6.01021e-186
Lhx1_MA1518.2	Lhx1	MA1518.2	C_Lhx1	24830	0.0717	8394	0.07554	8612	-0.04851	3.02157e-88
LHX5_MA1519.1	LHX5	MA1519.1	C_LHX5	39682	0.05192	10877	0.05412	11296	-0.0522	2.56922e-103
MAF_MA1520.1	MAF	MA1520.1	C_MAFA	56189	0.0868	24788	0.08788	24795	0.00972	3.12498e-47
MAFA_MA1521.1	MAFA	MA1521.1	C_MAFA	58214	0.09432	27214	0.09393	26947	0.03705	2.97672e-95
MAZ_MA1522.1	MAZ	MA1522.1	C_PATZ1	231706	0.14863	133308	0.13603	127023	0.18827	1.24017e-197
MSANTD3_MA1523.1	MSANTD3	MA1523.1	C_MSANTD3	87917	0.08349	39486	0.08257	39051	0.04851	4.58373e-117
Msgn1_MA1524.2	Msgn1	MA1524.2	C_Msgn1	107178	0.07452	39588	0.07737	40375	-0.02243	9.90462e-89
NFATC4_MA1525.2	NFATC4	MA1525.2	C_Nfatc2	78089	0.06174	23600	0.06291	24298	-0.02675	8.48309e-90
NFIC_MA1527.1	NFIC	MA1527.1	C_NFIB	84759	0.12309	46503	0.12804	45924	-0.01248	2.95249e-58
NFIX_MA1528.1	NFIX	MA1528.1	C_NFIB	99730	0.12866	56557	0.13238	55476	0.0146	7.45921e-73
NHLH2_MA1529.1	NHLH2	MA1529.1	C_NHLH2	98966	0.11007	51018	0.10923	49345	0.0769	2.14472e-140
NKX6-3_MA1530.1	NKX6-3	MA1530.1	C_NKX6-3	51036	0.05545	14667	0.05812	15198	-0.04697	2.93301e-102
NR1D1_MA1531.1	NR1D1	MA1531.1	C_NR1D1	72368	0.09768	35022	0.09596	34291	0.05917	3.81133e-118
NR1D2_MA1532.2	NR1D2	MA1532.2	C_NR1D1	71645	0.08461	31508	0.08327	31009	0.04359	1.46649e-110
NR1I2_MA1533.1	NR1I2	MA1533.1	C_NR1I2	51419	0.09239	24860	0.09056	24247	0.0622	6.04682e-112
NR1I3_MA1534.1	NR1I3	MA1534.1	C_Vdr	60894	0.05806	19803	0.05954	20406	-0.02365	5.64616e-83
NR2C1_MA1535.1	NR2C1	MA1535.1	C_NR2C2	91279	0.09007	44122	0.0874	42959	0.07315	2.77881e-142
NR2C2_MA1536.1	NR2C2	MA1536.1	C_NR2C2	62621	0.08822	29337	0.08579	28753	0.05751	3.69262e-118
NR2F1_MA1537.1	NR2F1	MA1537.1	C_NR2C2	88748	0.08327	39787	0.0808	38849	0.06667	3.80929e-132
NR2F1_MA1538.1	NR2F1	MA1538.1	C_NR2F1	43219	0.09332	20417	0.09083	20011	0.0676	5.00258e-113
NR2F6_MA1539.1	NR2F6	MA1539.1	C_NR2F1	39067	0.09192	18625	0.0891	18152	0.07285	1.29975e-119
NR5A1_MA1540.2	NR5A1	MA1540.2	C_NR5A1	155207	0.07169	67027	0.07088	65667	0.04597	6.87681e-126
NR6A1_MA1541.1	NR6A1	MA1541.1	C_NR6A1	84490	0.06932	34086	0.06885	33802	0.02739	8.20786e-93
OSR1_MA1542.1	OSR1	MA1542.1	C_OSR1	57566	0.0844	24207	0.08579	24587	-0.01185	2.31792e-49
OVOL1_MA1544.1	OVOL1	MA1544.1	C_OVOL1	8393	0.08479	3291	0.08512	3393	-0.0144	4.63233e-24
OVOL2_MA1545.1	OVOL2	MA1545.1	C_OVOL1	7862	0.093	3299	0.09192	3358	0.0081	2.10158e-06
PAX3_MA1546.1	PAX3	MA1546.1	C_PAX3	20771	0.08711	8112	0.08601	8104	0.01986	1.68225e-47
PITX2_MA1547.2	PITX2	MA1547.2	C_OTX2	56079	0.05729	18906	0.05728	18810	0.00822	3.98151e-31
PLAGL2_MA1548.1	PLAGL2	MA1548.1	C_PLAGL2	57062	0.12463	31945	0.11622	30126	0.18602	7.55569e-168
POU6F1_MA1549.1	POU6F1	MA1549.1	C_POU6F2	55547	0.06105	17411	0.06361	17964	-0.03793	9.76105e-95
PPARD_MA1550.1	PPARD	MA1550.1	C_NR2C2	83013	0.07413	34477	0.07237	33782	0.054	9.15209e-120
RARB_MA1552.1	RARB	MA1552.1	C_RXRG	34720	0.09385	15504	0.08998	15160	0.06595	7.33049e-112
RARG_MA1553.1	RARG	MA1553.1	C_RXRG	34030	0.0863	14444	0.08382	14224	0.04927	2.87876e-97
RFX7_MA1554.1	RFX7	MA1554.1	C_RFX7	43092	0.08838	17739	0.08844	17715	0.01045	1.15783e-34
RXRB_MA1555.1	RXRB	MA1555.1	C_RXRG	36967	0.09548	17010	0.09075	16480	0.08774	4.792e-123
RXRG_MA1556.1	RXRG	MA1556.1	C_RXRG	45709	0.10103	21711	0.09553	21014	0.09342	8.46344e-131
SMAD5_MA1557.1	SMAD5	MA1557.1	C_SMAD3	22757	0.08896	10190	0.08835	10118	0.022	1.09016e-55
SNAI1_MA1558.1	SNAI1	MA1558.1	C_ASCL1	116244	0.06394	47380	0.06333	45224	0.08	5.46714e-142
SNAI3_MA1559.1	SNAI3	MA1559.1	C_ASCL1	116371	0.06411	47338	0.06365	45250	0.07451	7.47183e-142
SOHLH2_MA1560.1	SOHLH2	MA1560.1	C_MYC	26374	0.12077	13394	0.11367	13013	0.1157	4.92346e-133
SOX12_MA1561.1	SOX12	MA1561.1	C_SOX12	35271	0.08717	13287	0.09213	13825	-0.05916	4.31092e-102
SOX14_MA1562.1	SOX14	MA1562.1	C_SOX14	38048	0.09724	14349	0.10362	15091	-0.07277	3.15514e-118
SOX18_MA1563.2	SOX18	MA1563.2	C_SOX18	44777	0.08494	15571	0.09086	16326	-0.07153	6.87331e-114
SP9_MA1564.1	SP9	MA1564.1	C_KLF9	188822	0.1802	110803	0.16233	104985	0.22425	5.13442e-200
TBX18_MA1565.1	TBX18	MA1565.1	C_TBX18	107977	0.07392	43774	0.07206	42592	0.06776	1.79743e-137
TBX3_MA1566.2	TBX3	MA1566.2	C_TBX18	67018	0.06306	24756	0.06218	24350	0.04813	1.94325e-110
Tbx6_MA1567.2	Tbx6	MA1567.2	C_TBX18	105976	0.07186	42523	0.07097	41513	0.05559	3.62793e-123
TCF21_MA1568.1	TCF21	MA1568.1	C_ATOH7	47684	0.06806	16790	0.06852	16940	0.01365	3.07403e-47
TFAP2E_MA1569.1	TFAP2E	MA1569.1	C_TFAP2C	69192	0.12269	38236	0.11273	36050	0.19263	6.31031e-171
TFAP4_MA1570.1	TFAP4	MA1570.1	C_TFAP4	46394	0.0556	14453	0.05615	14669	-0.00042	0.842517
TGIF2LX_MA1571.1	TGIF2LX	MA1571.1	C_TGIF2LX	51114	0.08172	21562	0.08234	21191	0.03264	2.29328e-84
TGIF2LY_MA1572.1	TGIF2LY	MA1572.1	C_TGIF2LX	47935	0.07897	19805	0.07943	19429	0.03123	7.60948e-86
Thap11_MA1573.2	Thap11	MA1573.2	C_Thap11	89827	0.10323	37410	0.10236	37165	0.02905	4.23809e-94
THRB_MA1574.1	THRB	MA1574.1	C_NR2C2	85787	0.08682	39201	0.08327	38126	0.08432	9.82893e-136
THRB_MA1575.1	THRB	MA1575.1	C_THRB	42936	0.10239	21496	0.0998	20752	0.07757	2.78259e-122
THRB_MA1576.1	THRB	MA1576.1	C_THRB	93506	0.0841	42006	0.08277	41198	0.05344	2.28043e-124
TLX2_MA1577.1	TLX2	MA1577.1	C_TLX2	25127	0.07525	8392	0.07756	8669	-0.04389	3.96915e-87
VEZF1_MA1578.1	VEZF1	MA1578.1	C_ZNF740	91745	0.11069	47758	0.10463	45306	0.14418	1.939e-166
ZBTB26_MA1579.1	ZBTB26	MA1579.1	C_ZBTB26	140403	0.07827	57126	0.0791	57198	0.00305	1.67979e-17
ZBTB32_MA1580.1	ZBTB32	MA1580.1	C_ZBTB32	62621	0.05805	21224	0.05992	21769	-0.03263	1.06909e-87
ZBTB6_MA1581.1	ZBTB6	MA1581.1	C_ZBTB6	120712	0.10407	60270	0.10174	58599	0.07519	4.40003e-141
ZFP57_MA1583.1	ZFP57	MA1583.1	C_ZFP57	19795	0.13811	10904	0.12582	10289	0.20451	4.36604e-147
ZIC5_MA1584.1	ZIC5	MA1584.1	C_ZIC5	101963	0.13378	58555	0.12384	55363	0.18301	7.88602e-177
ZKSCAN1_MA1585.1	ZKSCAN1	MA1585.1	C_ZKSCAN1	50080	0.08361	20779	0.08389	20839	0.01222	2.70009e-50
ZNF135_MA1587.1	ZNF135	MA1587.1	C_ZNF135	138398	0.09212	65471	0.08692	62927	0.10934	1.58844e-159
ZNF136_MA1588.1	ZNF136	MA1588.1	C_ZNF136	71739	0.06604	24768	0.06742	25012	-0.00819	1.24161e-37
ZNF140_MA1589.1	ZNF140	MA1589.1	C_ZNF140	78908	0.08972	33956	0.08937	33845	0.01826	1.57228e-70
ZNF274_MA1592.1	ZNF274	MA1592.1	C_ZNF274	79310	0.07447	31369	0.07541	31551	-0.00101	3.85294e-05
ZNF317_MA1593.1	ZNF317	MA1593.1	C_ZNF317	138140	0.08219	57700	0.08474	58292	-0.02682	3.20569e-99
ZNF382_MA1594.1	ZNF382	MA1594.1	C_ZNF382	70250	0.07696	27615	0.07715	27798	0.00559	1.07996e-25
ZNF460_MA1596.1	ZNF460	MA1596.1	C_ZNF460	269070	0.12091	143939	0.11172	136712	0.16595	1.28554e-195
ZNF528_MA1597.1	ZNF528	MA1597.1	C_ZNF528	129954	0.08634	56310	0.08695	56362	0.01047	1.12555e-60
ZNF682_MA1599.1	ZNF682	MA1599.1	C_ZNF682	124919	0.14227	69689	0.1336	67309	0.12824	6.92466e-172
ZNF684_MA1600.1	ZNF684	MA1600.1	C_ZNF684	114402	0.10267	55027	0.10084	54121	0.05507	3.18137e-129
ZNF75D_MA1601.2	ZNF75D	MA1601.2	C_ZNF75D	111434	0.08242	46948	0.08249	46718	0.02541	1.27657e-97
ZSCAN29_MA1602.1	ZSCAN29	MA1602.1	C_ZSCAN29	45408	0.08036	20434	0.07846	20162	0.04767	6.79926e-98
Dmrt1_MA1603.1	Dmrt1	MA1603.1	C_Dmrt1	70733	0.05641	22168	0.05876	22976	-0.04671	3.79677e-106
Ebf2_MA1604.1	Ebf2	MA1604.1	C_EBF1	124706	0.09598	60091	0.09421	58694	0.06572	2.84232e-137
Foxf1_MA1606.1	Foxf1	MA1606.1	C_FOXN3	83527	0.0595	25195	0.06307	26432	-0.07229	3.63624e-136
Foxl2_MA1607.1	Foxl2	MA1607.1	C_FOXN3	92410	0.05198	24954	0.0547	26244	-0.0617	2.77261e-129
Isl1_MA1608.1	Isl1	MA1608.1	C_Isl1	41087	0.06963	14639	0.07182	14977	-0.0257	1.57514e-75
Plagl1_MA1615.1	Plagl1	MA1615.1	C_Plagl1	160460	0.12191	88290	0.11661	84499	0.12528	9.0549e-173
Prdm15_MA1616.1	Prdm15	MA1616.1	C_Prdm15	117157	0.07806	47242	0.07811	47024	0.0127	1.96361e-67
Ptf1a_MA1618.1	Ptf1a	MA1618.1	C_Neurod2	134246	0.07559	53356	0.07908	53989	-0.01983	3.05978e-90
Ptf1A_MA1619.1	Ptf1A	MA1619.1	C_Tcf12	105761	0.11256	53751	0.11736	53517	-0.01177	4.5693e-62
Ptf1A_MA1620.1	Ptf1A	MA1620.1	C_Rbpjl	115189	0.06729	47762	0.06705	45588	0.07698	1.43319e-144
Rbpjl_MA1621.1	Rbpjl	MA1621.1	C_Rbpjl	125659	0.06777	52767	0.06711	50216	0.0883	1.81531e-148
Stat2_MA1623.1	Stat2	MA1623.1	C_Stat2	252407	0.0546	71887	0.05725	74937	-0.0615	1.31312e-145
Stat5a_MA1624.1	Stat5a	MA1624.1	C_Stat5a	105403	0.07096	37415	0.07317	38104	-0.02359	2.68964e-95
Stat5b_MA1625.1	Stat5b	MA1625.1	C_Stat5b	135389	0.07844	51806	0.08063	52178	-0.01873	2.75524e-85
Wt1_MA1627.1	Wt1	MA1627.1	C_Wt1	272137	0.12186	142266	0.11342	135321	0.16095	2.22092e-191
Zic1Zic2_MA1628.1	Zic1::Zic2	MA1628.1	C_Zic2	144595	0.11056	74268	0.10758	72342	0.07954	2.81325e-145
Zic2_MA1629.1	Zic2	MA1629.1	C_Zic2	209290	0.10244	104166	0.10167	102350	0.04623	3.75689e-135
ZNF281_MA1630.2	ZNF281	MA1630.2	C_PATZ1	350432	0.13318	189868	0.12341	181411	0.16033	1.89357e-194
ASCL1_MA1631.1	ASCL1	MA1631.1	C_ASCL1	168154	0.09388	80160	0.09278	77109	0.08304	1.2876e-152
ATF2_MA1632.1	ATF2	MA1632.1	C_FOSL1::JUN	62780	0.09785	25626	0.09489	25484	0.03729	1.69919e-103
BACH1_MA1633.2	BACH1	MA1633.2	C_FOSL1::JUN	75712	0.06629	24607	0.06501	24678	0.04275	3.27896e-107
BATF_MA1634.1	BATF	MA1634.1	C_FOSL1::JUN	82697	0.06762	28291	0.06648	28280	0.04237	4.30057e-113
BHLHE22_MA1635.1	BHLHE22	MA1635.1	C_Tcf12	114178	0.11773	59375	0.12314	59076	-0.0136	3.71821e-68
CEBPG_MA1636.1	CEBPG	MA1636.1	C_CEBPG	53266	0.05803	15199	0.05896	15783	-0.03034	8.91273e-85
EBF3_MA1637.1	EBF3	MA1637.1	C_EBF1	121264	0.0979	59301	0.0957	57745	0.07302	7.62143e-143
HAND2_MA1638.1	HAND2	MA1638.1	C_Neurod2	138271	0.0787	56047	0.08191	56248	-0.01174	1.10881e-67
MEIS1_MA1639.1	MEIS1	MA1639.1	C_MEIS2	53993	0.05216	14277	0.05326	14847	-0.02137	4.45636e-68
MEIS2_MA1640.1	MEIS2	MA1640.1	C_MEIS2	63308	0.04441	14277	0.04543	14808	-0.03175	1.60708e-90
MYF5_MA1641.1	MYF5	MA1641.1	C_Tcf12	105456	0.11274	53664	0.11769	53488	-0.01599	1.17187e-77
NEUROG2_MA1642.1	NEUROG2	MA1642.1	C_Neurod2	135610	0.0786	54599	0.08185	54858	-0.01007	1.96658e-61
NFIB_MA1643.1	NFIB	MA1643.1	C_NFIB	128520	0.1239	71345	0.12767	70125	0.01019	7.61514e-58
NFYC_MA1644.1	NFYC	MA1644.1	C_NFYA	56043	0.17204	24365	0.16681	24525	0.02202	7.66354e-74
NKX2-2_MA1645.1	NKX2-2	MA1645.1	C_NKX2-2	94608	0.08382	40931	0.08328	40548	0.03424	8.22777e-101
OSR2_MA1646.1	OSR2	MA1646.1	C_OSR2	159759	0.08772	68790	0.08974	69531	-0.00912	3.46399e-55
Prdm4_MA1647.2	Prdm4	MA1647.2	C_Prdm4	87400	0.07835	34749	0.07947	35053	-0.00266	3.32746e-11
TCF12_MA1648.1	TCF12	MA1648.1	C_ASCL1	130848	0.10456	64469	0.10014	61663	0.11712	1.75661e-165
ZBTB12_MA1649.1	ZBTB12	MA1649.1	C_ZBTB12	104225	0.07392	42811	0.07569	43036	-0.00113	0.0277362
ZBTB14_MA1650.1	ZBTB14	MA1650.1	C_ZBTB14	70301	0.16279	43009	0.14061	39639	0.3347	8.10345e-197
ZFP42_MA1651.1	ZFP42	MA1651.1	C_ZFP42	99062	0.09715	42820	0.09611	42605	0.03165	2.25863e-100
ZKSCAN5_MA1652.1	ZKSCAN5	MA1652.1	C_ZKSCAN5	208354	0.09579	96237	0.09267	94309	0.07044	1.65595e-148
ZNF148_MA1653.1	ZNF148	MA1653.1	C_PATZ1	309773	0.1428	174658	0.13104	166197	0.18459	5.59257e-200
ZNF16_MA1654.1	ZNF16	MA1654.1	C_ZNF16	148993	0.09697	70403	0.09557	69291	0.04918	5.57422e-129
ZNF341_MA1655.1	ZNF341	MA1655.1	C_ZNF341	116854	0.09908	54401	0.10146	54384	-0.00456	4.03679e-28
ZNF449_MA1656.1	ZNF449	MA1656.1	C_ZNF449	126114	0.11862	65115	0.11434	63425	0.0867	1.32441e-146
ZNF652_MA1657.1	ZNF652	MA1657.1	C_ZNF652	61502	0.05754	18720	0.05838	19069	-0.0175	1.89896e-65
FOXA3_MA1683.1	FOXA3	MA1683.1	C_FOXN3	70370	0.06111	21787	0.06431	22724	-0.05556	2.12109e-122
Foxn1_MA1684.1	Foxn1	MA1684.1	C_Foxn1	35748	0.14832	21246	0.13627	20199	0.19687	3.38518e-153
DMRTA1_MA1707.1	DMRTA1	MA1707.1	C_DMRTA1	52417	0.0487	13144	0.05087	13974	-0.05227	1.02772e-111
ETV7_MA1708.1	ETV7	MA1708.1	C_Spi1	81235	0.13031	40559	0.12439	40422	0.05592	4.47821e-127
ZIM3_MA1709.1	ZIM3	MA1709.1	C_ZIM3	180855	0.06047	56691	0.06356	58756	-0.05624	4.9013e-139
ZNF257_MA1710.1	ZNF257	MA1710.1	C_ZNF257	252737	0.09987	119948	0.09606	117033	0.077	1.35005e-159
ZNF343_MA1711.1	ZNF343	MA1711.1	C_ZNF343	79347	0.1195	41557	0.11373	40419	0.10484	5.52619e-147
ZNF454_MA1712.1	ZNF454	MA1712.1	C_ZNF454	172988	0.12857	99038	0.11919	93433	0.19013	5.14645e-190
ZNF610_MA1713.1	ZNF610	MA1713.1	C_ZNF610	132823	0.15804	81853	0.13827	75984	0.30585	1.42864e-209
ZNF675_MA1714.1	ZNF675	MA1714.1	C_ZNF675	110826	0.08333	45134	0.08451	45550	-0.00178	4.841e-07
ZNF707_MA1715.1	ZNF707	MA1715.1	C_ZNF707	138703	0.10223	67398	0.09911	65839	0.07406	1.33845e-140
ZNF76_MA1716.1	ZNF76	MA1716.1	C_ZNF76	112422	0.11851	54828	0.11537	53595	0.07201	4.34971e-143
ZNF784_MA1717.1	ZNF784	MA1717.1	C_ZNF784	33932	0.0716	13637	0.06954	13354	0.05991	1.65307e-108
ZNF8_MA1718.1	ZNF8	MA1718.1	C_ZNF8	58712	0.04838	16444	0.04904	16874	-0.01468	3.94839e-61
ZNF816_MA1719.1	ZNF816	MA1719.1	C_ZNF816	145259	0.10559	73918	0.10218	71574	0.09456	2.4792e-152
ZNF85_MA1720.1	ZNF85	MA1720.1	C_ZNF85	70495	0.07061	25991	0.07212	26528	-0.01495	4.95752e-67
ZNF93_MA1721.1	ZNF93	MA1721.1	C_ZNF93	127594	0.13192	72238	0.12074	68176	0.20787	5.82502e-189
ZSCAN31_MA1722.1	ZSCAN31	MA1722.1	C_ZSCAN31	64879	0.09161	28818	0.09155	28763	0.01308	2.17921e-55
PRDM9_MA1723.1	PRDM9	MA1723.1	C_PRDM9	379763	0.10957	191267	0.10412	184974	0.11201	3.06995e-180
Rfx6_MA1724.1	Rfx6	MA1724.1	C_Rfx6	104154	0.08704	43970	0.08684	43617	0.02086	2.03626e-89
ZNF189_MA1725.1	ZNF189	MA1725.1	C_ZNF189	153484	0.08811	66715	0.09102	67145	-0.01285	1.08484e-70
ZNF331_MA1726.1	ZNF331	MA1726.1	C_ZNF331	181194	0.10259	89171	0.10208	88009	0.04527	7.37073e-130
ZNF417_MA1727.1	ZNF417	MA1727.1	C_ZNF417	49708	0.13591	27671	0.13053	26830	0.10766	4.49283e-139
ZNF549_MA1728.1	ZNF549	MA1728.1	C_ZNF549	178641	0.11183	92327	0.11021	90014	0.06933	1.50779e-150
ZNF680_MA1729.1	ZNF680	MA1729.1	C_ZNF680	123968	0.06272	39406	0.06495	40751	-0.03725	2.09835e-116
ZNF708_MA1730.1	ZNF708	MA1730.1	C_ZNF708	141733	0.1036	69846	0.10307	68800	0.04077	9.74062e-122
ZNF768_MA1731.1	ZNF768	MA1731.1	C_ZNF768	217658	0.09857	103247	0.09808	102126	0.03216	3.16725e-120
BNC2_MA1928.1	BNC2	MA1928.1	C_FOSL1::JUN	78774	0.06981	27895	0.06874	27741	0.04796	1.34799e-117
CTCF_MA1929.1	CTCF	MA1929.1	C_CTCF	194307	0.13861	111774	0.13388	108236	0.10157	5.02508e-163
CTCF_MA1930.1	CTCF	MA1930.1	C_CTCF	168154	0.13986	97727	0.13561	94905	0.09376	1.37358e-157
ELK1HOXA1_MA1931.1	ELK1::HOXA1	MA1931.1	C_ELK1::HOXA1	39093	0.13397	17932	0.12742	17998	0.03812	2.37712e-91
ELK1HOXB13_MA1932.1	ELK1::HOXB13	MA1932.1	C_ELK1::HOXB13	30407	0.11579	13070	0.11133	13119	0.02811	6.41488e-69
ELK1SREBF2_MA1933.1	ELK1::SREBF2	MA1933.1	C_ELK1::SREBF2	36733	0.1473	19018	0.13736	18717	0.11208	4.48874e-139
ERFFIGLA_MA1934.1	ERF::FIGLA	MA1934.1	C_ETV5::FIGLA	94511	0.09648	44355	0.09532	43601	0.05426	6.62679e-128
ERFFOXI1_MA1935.1	ERF::FOXI1	MA1935.1	C_ERF::FOXI1	108810	0.09471	47435	0.09346	47766	0.00545	1.10974e-34
ERFFOXO1_MA1936.1	ERF::FOXO1	MA1936.1	C_ERF::FOXO1	120190	0.08431	49831	0.08475	50275	-0.00782	1.73835e-42
ERFHOXB13_MA1937.1	ERF::HOXB13	MA1937.1	C_ERF::HOXB13	40877	0.0753	14590	0.07528	14889	-0.01079	6.41552e-37
ERFNHLH1_MA1938.1	ERF::NHLH1	MA1938.1	C_ERF::NHLH1	98655	0.1085	48299	0.10668	47457	0.05941	3.5436e-127
ERFSREBF2_MA1939.1	ERF::SREBF2	MA1939.1	C_ERF::SREBF2	36071	0.09638	15538	0.09385	15315	0.04342	1.0812e-94
ETV2DRGX_MA1940.1	ETV2::DRGX	MA1940.1	C_ETV5::DRGX	39006	0.07486	13539	0.07564	14008	-0.03218	1.87742e-87
ETV2FIGLA_MA1941.1	ETV2::FIGLA	MA1941.1	C_ETV5::FIGLA	112706	0.10179	54234	0.0997	53048	0.06833	3.23691e-133
ETV2FOXI1_MA1942.1	ETV2::FOXI1	MA1942.1	C_ERF::FOXI1	120276	0.09105	52514	0.09061	52994	0.00255	1.06823e-12
ETV2HOXB13_MA1943.1	ETV2::HOXB13	MA1943.1	C_ETV2::HOXB13	30381	0.06946	10099	0.07012	10331	-0.02008	4.8399e-57
ETV5DRGX_MA1944.1	ETV5::DRGX	MA1944.1	C_ETV5::DRGX	58035	0.08564	22614	0.08539	23056	-0.01454	2.50799e-56
ETV5FIGLA_MA1945.1	ETV5::FIGLA	MA1945.1	C_ETV5::FIGLA	142312	0.09711	67622	0.09492	65874	0.07256	2.62669e-147
ETV5FOXI1_MA1946.1	ETV5::FOXI1	MA1946.1	C_ERF::FOXI1	96353	0.08745	40995	0.08777	41287	-0.00453	7.77837e-27
ETV5FOXO1_MA1947.1	ETV5::FOXO1	MA1947.1	C_ETV5::FOXO1	108264	0.07976	44154	0.08117	44833	-0.01621	1.24666e-77
ETV5HOXA2_MA1948.1	ETV5::HOXA2	MA1948.1	C_ETV5::HOXA2	38752	0.08451	15162	0.08356	15452	0.0007	0.578205
FLI1DRGX_MA1949.1	FLI1::DRGX	MA1949.1	C_ETV5::DRGX	40945	0.08765	15841	0.0868	16150	-0.01457	2.58362e-51
FLI1FOXI1_MA1950.1	FLI1::FOXI1	MA1950.1	C_ERF::FOXI1	118559	0.08066	48019	0.08127	48823	-0.01569	3.34246e-76
FOS_MA1951.1	FOS	MA1951.1	C_FOSL1::JUN	26519	0.12989	12128	0.12258	11826	0.08515	6.84572e-112
FOXJ2ELF1_MA1952.1	FOXJ2::ELF1	MA1952.1	C_FOXJ2::ELF1	117893	0.07905	44353	0.07923	45208	-0.01987	3.40761e-91
FOXO1ELF1_MA1953.1	FOXO1::ELF1	MA1953.1	C_ERF::FOXI1	126578	0.07575	48975	0.07722	49899	-0.02317	4.06454e-96
FOXO1ELK1_MA1954.1	FOXO1::ELK1	MA1954.1	C_ERF::FOXI1	129270	0.08146	52006	0.08204	52926	-0.0159	1.57086e-79
FOXO1ELK3_MA1955.1	FOXO1::ELK3	MA1955.1	C_ERF::FOXI1	97372	0.07962	38063	0.0807	38695	-0.02317	1.23465e-87
FOXO1FLI1_MA1956.1	FOXO1::FLI1	MA1956.1	C_ERF::FOXI1	109736	0.07395	40576	0.07571	41647	-0.03328	3.30676e-110
HOXB2ELK1_MA1957.1	HOXB2::ELK1	MA1957.1	C_HOXB2::ELK1	37747	0.11757	16697	0.11304	16782	0.02386	7.73052e-72
HOXD12ELK1_MA1958.1	HOXD12::ELK1	MA1958.1	C_HOXD12::ELK1	42087	0.07248	14414	0.07263	14877	-0.01912	6.5498e-61
KLF7_MA1959.1	KLF7	MA1959.1	C_KLF4	217391	0.1557	124046	0.1411	117372	0.20581	5.6756e-196
MGAEVX1_MA1960.1	MGA::EVX1	MA1960.1	C_MGA::EVX1	56983	0.05861	17804	0.06035	18227	-0.01767	8.49491e-67
PATZ1_MA1961.1	PATZ1	MA1961.1	C_PATZ1	295834	0.15463	172500	0.13978	162823	0.22346	1.98045e-209
POU2F1SOX2_MA1962.1	POU2F1::SOX2	MA1962.1	C_POU2F1::SOX2	82473	0.04861	19087	0.05121	20170	-0.05232	6.57576e-123
SATB1_MA1963.1	SATB1	MA1963.1	C_SATB1	42705	0.04661	9874	0.04875	10538	-0.06482	3.85276e-110
SMAD2_MA1964.1	SMAD2	MA1964.1	C_SMAD2	105985	0.09873	51730	0.09831	51125	0.03526	1.84452e-109
SP5_MA1965.1	SP5	MA1965.1	C_SP5	266246	0.12087	139107	0.11509	134399	0.11364	3.72276e-176
TFAP4ETV1_MA1966.1	TFAP4::ETV1	MA1966.1	C_ETV5::FIGLA	123111	0.10801	61042	0.10381	59404	0.09003	2.36662e-149
TFAP4FLI1_MA1967.1	TFAP4::FLI1	MA1967.1	C_TFAP4::FLI1	115127	0.09997	54254	0.10221	54067	0.00823	9.06518e-47
TFCP2_MA1968.1	TFCP2	MA1968.1	C_TFCP2	19955	0.08	7736	0.08039	7788	-0.00609	2.51057e-12
THRA_MA1969.1	THRA	MA1969.1	C_THRA	130302	0.09608	63286	0.09456	62198	0.05454	1.67087e-130
TRPS1_MA1970.1	TRPS1	MA1970.1	C_Gata3	60988	0.04973	16885	0.05085	17572	-0.03228	8.29872e-89
ZBED2_MA1971.1	ZBED2	MA1971.1	C_ZBED2	17552	0.11794	8659	0.11282	8479	0.08341	4.65922e-105
ZFP14_MA1972.1	ZFP14	MA1972.1	C_ZFP14	237644	0.10138	113848	0.09788	111675	0.07402	2.29697e-162
ZKSCAN3_MA1973.1	ZKSCAN3	MA1973.1	C_ZKSCAN3	138518	0.10464	71350	0.10023	68772	0.10614	2.28286e-162
ZNF211_MA1974.1	ZNF211	MA1974.1	C_ZNF211	51041	0.04191	12485	0.04178	12683	-0.00746	7.67279e-32
ZNF214_MA1975.1	ZNF214	MA1975.1	C_ZNF214	63425	0.07111	23584	0.07302	23907	-0.02015	3.7248e-75
ZNF320_MA1976.1	ZNF320	MA1976.1	C_ZNF320	261003	0.1249	145369	0.11633	138091	0.17084	5.11336e-194
ZNF324_MA1977.1	ZNF324	MA1977.1	C_ZNF324	126790	0.08381	54188	0.08363	53597	0.02801	3.37898e-102
ZNF354A_MA1978.1	ZNF354A	MA1978.1	C_ZNF354A	128341	0.03929	25234	0.04104	26931	-0.05943	1.07436e-136
ZNF416_MA1979.1	ZNF416	MA1979.1	C_ZNF416	130589	0.10071	63316	0.10126	62111	0.03816	2.3106e-118
ZNF418_MA1980.1	ZNF418	MA1980.1	C_ZNF418	141285	0.07392	53979	0.07565	54937	-0.01884	3.07259e-90
ZNF530_MA1981.1	ZNF530	MA1981.1	C_ZNF530	298049	0.12291	159902	0.1161	154341	0.12352	8.16425e-185
ZNF574_MA1982.1	ZNF574	MA1982.1	C_ZNF574	108943	0.127	58887	0.12253	57384	0.08541	2.41823e-147
ZNF582_MA1983.1	ZNF582	MA1983.1	C_ZNF582	87278	0.07436	33164	0.07641	33603	-0.02215	2.37215e-88
ZNF667_MA1984.1	ZNF667	MA1984.1	C_ZNF667	95772	0.07489	38151	0.07598	38450	0.0051	5.05555e-27
ZNF669_MA1985.1	ZNF669	MA1985.1	C_ZNF669	43276	0.11821	23019	0.11006	21818	0.15862	2.3034e-155
ZNF692_MA1986.1	ZNF692	MA1986.1	C_ZNF692	106479	0.11847	57489	0.11398	55261	0.11442	3.97905e-162
ZNF701_MA1987.1	ZNF701	MA1987.1	C_ZNF701	283399	0.10773	140083	0.10323	136384	0.09337	1.25135e-169
Atf3_MA1988.1	Atf3	MA1988.1	C_FOSL1::JUN	83971	0.06881	29292	0.06768	29252	0.04542	1.21325e-111
Bcl11B_MA1989.1	Bcl11B	MA1989.1	C_Bcl11B	126499	0.06648	45197	0.06776	45858	-0.02017	2.31954e-81
Gli1_MA1990.1	Gli1	MA1990.1	C_Gli2	127032	0.09823	62572	0.09501	60249	0.09657	2.60984e-153
Hnf1A_MA1991.1	Hnf1A	MA1991.1	C_Lef1	102625	0.07492	38595	0.07788	39321	-0.02864	6.85011e-101
Ikzf3_MA1992.1	Ikzf3	MA1992.1	C_Erg	208038	0.10241	99843	0.10018	98921	0.0442	2.75753e-132
Neurod2_MA1993.1	Neurod2	MA1993.1	C_Tcf12	110845	0.11725	57308	0.1227	57104	-0.01562	4.22935e-70
Nkx2-1_MA1994.1	Nkx2-1	MA1994.1	C_Nkx2-1	66288	0.06413	23551	0.0656	23899	-0.02102	2.8224e-76
Npas4_MA1995.1	Npas4	MA1995.1	C_Npas4	25115	0.11244	12232	0.10886	11962	0.07279	4.73818e-111
Nr1H2_MA1996.1	Nr1H2	MA1996.1	C_Nr1H2	100311	0.08019	44817	0.07905	44106	0.04022	4.84898e-113
Olig2_MA1997.1	Olig2	MA1997.1	C_Tcf12	114668	0.11702	59271	0.12259	59069	-0.01667	1.93396e-76
Prdm14_MA1998.1	Prdm14	MA1998.1	C_Prdm14	66419	0.07971	28592	0.07906	28408	0.02653	1.69004e-85
Prdm5_MA1999.1	Prdm5	MA1999.1	C_Prdm5	157238	0.08644	68743	0.0866	68376	0.02531	6.66431e-100
Six4_MA2001.1	Six4	MA2001.1	C_SIX1	69755	0.06168	24018	0.06169	24247	0.00404	1.04266e-14
Zfp335_MA2002.1	Zfp335	MA2002.1	C_Zfp335	151540	0.09182	70015	0.09257	69431	0.02102	6.03526e-95
NKX2-4_MA2003.1	NKX2-4	MA2003.1	C_NKX2-3	78684	0.07881	32267	0.07932	32231	0.00796	1.23045e-40

## Sheet: 12wkctx neun neg
output_prefix	name	motif_id	cluster	total_tfbs	WT.COR.12W.Neg_footprints_mean_score	WT.COR.12W.Neg_footprints_bound	HD.COR.12W.Neg_footprints_mean_score	HD.COR.12W.Neg_footprints_bound	WT.COR.12W.Neg_footprints_HD.COR.12W.Neg_footprints_change	WT.COR.12W.Neg_footprints_HD.COR.12W.Neg_footprints_pvalue
Runx1_MA0002.2	Runx1	MA0002.2	C_Bcl11B	146497	0.08226	38046	0.0812	37748	-0.02163	4.48153e-92
TFAP2A_MA0003.4	TFAP2A	MA0003.4	C_TFAP2C	140246	0.12871	52601	0.132	53761	-0.11405	1.02087e-162
Arnt_MA0004.1	Arnt	MA0004.1	C_MYC	45263	0.11921	14133	0.11954	13994	-0.05166	3.78513e-105
AhrArnt_MA0006.1	Ahr::Arnt	MA0006.1	C_Ahr::Arnt	61000	0.11123	19073	0.11335	19467	-0.08229	2.68532e-133
Ar_MA0007.3	Ar	MA0007.3	C_Ar	49035	0.09209	14004	0.08434	12641	0.08248	1.03408e-128
TBXT_MA0009.2	TBXT	MA0009.2	C_TBXT	39454	0.0647	7414	0.06307	7074	-0.00073	0.588872
PAX5_MA0014.3	PAX5	MA0014.3	C_PAX5	39294	0.18232	16191	0.18666	16508	-0.11444	1.16909e-135
NR2F1_MA0017.2	NR2F1	MA0017.2	C_NR2F1	91608	0.08293	24136	0.08124	23655	-0.02458	5.04291e-89
CREB1_MA0018.4	CREB1	MA0018.4	C_FOSL1::JUN	78091	0.08543	18330	0.08315	17440	0.01712	6.17604e-72
Ddit3Cebpa_MA0019.1	Ddit3::Cebpa	MA0019.1	C_Ddit3::Cebpa	42402	0.07496	9240	0.07263	8889	0.01743	1.06691e-59
E2F1_MA0024.3	E2F1	MA0024.3	C_ZNF417	9513	0.19855	4682	0.20056	4753	-0.11227	9.72847e-104
NFIL3_MA0025.2	NFIL3	MA0025.2	C_NFIL3	56018	0.06008	8216	0.05518	7213	0.13909	1.08278e-155
EN1_MA0027.2	EN1	MA0027.2	C_ESX1	31891	0.08188	6480	0.07711	6240	0.03989	4.31978e-84
ELK1_MA0028.2	ELK1	MA0028.2	C_ETS1	28121	0.25024	12662	0.25312	12746	-0.07139	9.51642e-113
Mecom_MA0029.1	Mecom	MA0029.1	C_Mecom	69292	0.05735	9870	0.05442	9398	0.05375	5.86975e-121
FOXF2_MA0030.1	FOXF2	MA0030.1	C_FOXF2	63424	0.06181	10221	0.05925	9668	0.04734	1.15087e-109
FOXD1_MA0031.1	FOXD1	MA0031.1	C_FOXN3	65021	0.07016	12608	0.06737	12019	0.03039	5.25422e-94
FOXC1_MA0032.2	FOXC1	MA0032.2	C_FOXC2	106773	0.04966	11183	0.04646	10453	0.09334	2.53403e-148
FOXL1_MA0033.2	FOXL1	MA0033.2	C_FOXN3	48756	0.07165	9731	0.069	9347	0.02756	7.10622e-81
GATA1_MA0035.4	GATA1	MA0035.4	C_GATA1	44376	0.05892	7004	0.05624	6485	0.05473	1.02531e-100
GATA2_MA0036.3	GATA2	MA0036.3	C_Gata3	51691	0.05988	8300	0.05748	7923	0.03059	5.63078e-86
Gata3_MA0037.4	Gata3	MA0037.4	C_Gata3	59164	0.05721	8992	0.05493	8531	0.04432	9.98785e-107
GFI1_MA0038.2	GFI1	MA0038.2	C_Gfi1B	76361	0.07546	14859	0.07355	14430	0.02314	8.59258e-81
KLF4_MA0039.4	KLF4	MA0039.4	C_KLF4	287688	0.15375	108818	0.15863	112902	-0.13767	3.15257e-184
Foxq1_MA0040.1	Foxq1	MA0040.1	C_Foxq1	74161	0.05562	9910	0.05262	9266	0.08314	4.43187e-135
FOXD3_MA0041.2	FOXD3	MA0041.2	C_FOXD3	160701	0.05107	17802	0.04824	17129	0.06437	7.59606e-145
FOXI1_MA0042.2	FOXI1	MA0042.2	C_FOXN3	80421	0.07192	16394	0.06926	15795	0.02698	2.54227e-90
HLF_MA0043.3	HLF	MA0043.3	C_NFIL3	49820	0.06344	8136	0.05858	7237	0.12774	9.44974e-147
HNF1A_MA0046.2	HNF1A	MA0046.2	C_HNF1A	49946	0.04808	4722	0.04459	4309	0.09921	7.61553e-133
FOXA2_MA0047.3	FOXA2	MA0047.3	C_FOXN3	80339	0.06229	13133	0.05931	12413	0.05651	3.19329e-120
NHLH1_MA0048.2	NHLH1	MA0048.2	C_Tcf12	109209	0.10127	35370	0.10601	37151	-0.13216	4.37639e-170
Irf1_MA0050.3	Irf1	MA0050.3	C_Irf1	169670	0.0597	26669	0.05684	25880	0.06417	2.25544e-142
IRF2_MA0051.1	IRF2	MA0051.1	C_IRF2	76985	0.06615	13562	0.06387	13319	0.04338	7.1523e-109
MEF2A_MA0052.4	MEF2A	MA0052.4	C_MEF2A	142308	0.05052	15593	0.04663	14193	0.11966	3.47264e-165
MZF1_MA0056.2	MZF1	MA0056.2	C_MZF1	83707	0.08195	21145	0.08154	21243	-0.04007	1.21153e-106
MAX_MA0058.3	MAX	MA0058.3	C_MYC	33449	0.12182	10890	0.12265	10767	-0.05437	2.86645e-105
MAXMYC_MA0059.1	MAX::MYC	MA0059.1	C_MAX::MYC	54218	0.09564	14317	0.09537	14165	-0.04805	3.87165e-103
NFYA_MA0060.3	NFYA	MA0060.3	C_NFYA	51998	0.18447	14823	0.18328	14549	-0.01185	1.99235e-49
GABPA_MA0062.3	GABPA	MA0062.3	C_Erg	184318	0.09685	53685	0.09451	52321	0.00077	0.240816
NKX2-5_MA0063.2	NKX2-5	MA0063.2	C_NKX2-5	64592	0.06836	12496	0.06565	11949	0.03728	3.11598e-100
PpargRxra_MA0065.2	Pparg::Rxra	MA0065.2	C_Pparg::Rxra	176243	0.09448	51193	0.09488	51856	-0.06646	1.74214e-140
PPARG_MA0066.1	PPARG	MA0066.1	C_PPARG	73938	0.08301	19491	0.08153	19296	-0.02581	3.26274e-87
PAX2_MA0067.2	PAX2	MA0067.2	C_PAX9	23510	0.157	9136	0.16132	9280	-0.10746	8.23771e-120
PAX4_MA0068.2	PAX4	MA0068.2	C_PAX4	20172	0.06641	3279	0.06217	3208	0.05997	7.69379e-97
PAX6_MA0069.1	PAX6	MA0069.1	C_PAX6	35541	0.07141	7109	0.06937	6810	0.0304	4.92518e-80
PBX1_MA0070.1	PBX1	MA0070.1	C_PBX1	44944	0.06584	6599	0.0626	6262	0.06009	1.46585e-112
RORA_MA0071.1	RORA	MA0071.1	C_RORA	74157	0.0707	16272	0.06752	15302	0.02242	6.52149e-84
RORA_MA0072.1	RORA	MA0072.1	C_RORA	58594	0.06903	11902	0.06536	11192	0.04554	2.92362e-102
RREB1_MA0073.1	RREB1	MA0073.1	C_RREB1	252245	0.08455	59272	0.08527	60900	-0.06947	3.12341e-158
RXRAVDR_MA0074.1	RXRA::VDR	MA0074.1	C_RXRA::VDR	46050	0.08058	10962	0.07817	10726	-0.00741	3.89572e-32
PRRX2_MA0075.3	PRRX2	MA0075.3	C_PAX4	39571	0.06293	6074	0.05859	5919	0.06386	5.54128e-109
ELK4_MA0076.2	ELK4	MA0076.2	C_ETS1	78111	0.16851	30500	0.16883	30392	-0.04625	5.5435e-112
SOX9_MA0077.1	SOX9	MA0077.1	C_Sox17	52436	0.08046	11618	0.07789	11203	0.03247	1.97353e-91
Sox17_MA0078.2	Sox17	MA0078.2	C_Sox17	90122	0.08386	20909	0.08162	20448	0.01437	7.88944e-73
SP1_MA0079.5	SP1	MA0079.5	C_PATZ1	239011	0.20146	106527	0.21002	111910	-0.18653	9.90617e-204
Spi1_MA0080.6	Spi1	MA0080.6	C_Spi1	257013	0.08495	65382	0.08297	64604	-0.00402	3.85103e-38
SPIB_MA0081.2	SPIB	MA0081.2	C_Spi1	217610	0.08764	57444	0.08555	56475	-0.0013	1.35558e-09
SRF_MA0083.3	SRF	MA0083.3	C_SRF	27750	0.07186	5362	0.06895	4995	0.04348	1.94608e-84
SRY_MA0084.1	SRY	MA0084.1	C_SRY	62069	0.06078	8853	0.05708	8356	0.07832	3.10883e-130
Sox5_MA0087.2	Sox5	MA0087.2	C_Sox17	79683	0.08515	19214	0.08328	18768	0.00999	1.9406e-48
ZNF143_MA0088.2	ZNF143	MA0088.2	C_ZNF76	83822	0.09544	20835	0.0941	20215	-0.00728	2.32665e-39
MAFGNFE2L1_MA0089.2	MAFG::NFE2L1	MA0089.2	C_MAFG::NFE2L1	101591	0.0719	22601	0.0695	21465	0.02555	1.14554e-95
TEAD1_MA0090.3	TEAD1	MA0090.3	C_TEAD4	93511	0.07231	21083	0.07056	20232	0.01743	6.84685e-76
TAL1TCF3_MA0091.1	TAL1::TCF3	MA0091.1	C_TAL1::TCF3	93925	0.06934	19580	0.06904	19485	-0.03517	1.17655e-105
Hand1Tcf3_MA0092.1	Hand1::Tcf3	MA0092.1	C_Hand1::Tcf3	89793	0.07636	21302	0.07585	21483	-0.03052	2.25773e-90
USF1_MA0093.3	USF1	MA0093.3	C_BHLHE41	75610	0.09223	19579	0.09064	19022	-0.01058	1.53994e-48
Yy1_MA0095.3	Yy1	MA0095.3	C_Yy1	94351	0.08282	18741	0.08106	18147	0.03187	2.98285e-106
ETS1_MA0098.3	ETS1	MA0098.3	C_ETS1	47612	0.16547	16965	0.16462	16680	-0.0099	6.19114e-41
FOSJUN_MA0099.3	FOS::JUN	MA0099.3	C_FOSL1::JUN	70206	0.0721	15172	0.06928	14117	0.04881	6.19589e-113
MYB_MA0100.3	MYB	MA0100.3	C_MYB	73042	0.07573	16779	0.07417	16443	-0.00664	2.76653e-32
REL_MA0101.1	REL	MA0101.1	C_REL	65125	0.09659	18116	0.09582	18159	-0.0253	5.37011e-80
CEBPA_MA0102.4	CEBPA	MA0102.4	C_CEBPB	50479	0.06231	8684	0.05882	7985	0.08985	2.34682e-129
ZEB1_MA0103.3	ZEB1	MA0103.3	C_ASCL1	137428	0.07779	34340	0.07805	34520	-0.0653	1.60655e-140
MYCN_MA0104.4	MYCN	MA0104.4	C_MYCN	36840	0.13012	13131	0.1319	13254	-0.08523	1.34171e-118
NFKB1_MA0105.4	NFKB1	MA0105.4	C_NFKB2	36279	0.10492	11912	0.10603	12168	-0.08525	7.38562e-125
TP53_MA0106.3	TP53	MA0106.3	C_TP53	47790	0.07839	10551	0.07713	10104	-0.01619	3.49686e-61
RELA_MA0107.1	RELA	MA0107.1	C_RELA	72051	0.08904	19301	0.08793	19188	-0.01898	2.75803e-72
TBP_MA0108.2	TBP	MA0108.2	C_TBP	42163	0.06947	7232	0.0665	6695	0.06591	1.56474e-107
Spz1_MA0111.1	Spz1	MA0111.1	C_Spz1	76896	0.08401	19455	0.08373	19436	-0.04572	9.8639e-108
ESR1_MA0112.3	ESR1	MA0112.3	C_ESR2	57467	0.08873	16055	0.08819	15822	-0.03992	9.29272e-107
NR3C1_MA0113.3	NR3C1	MA0113.3	C_Ar	43657	0.08609	11699	0.07705	10296	0.11684	2.00078e-133
HNF4A_MA0114.4	HNF4A	MA0114.4	C_HNF4G	91355	0.07655	21410	0.07461	20858	0.00398	1.63275e-19
NR1H2RXRA_MA0115.1	NR1H2::RXRA	MA0115.1	C_NR1H2::RXRA	76236	0.07363	16496	0.07119	16072	0.0038	6.46232e-16
Znf423_MA0116.1	Znf423	MA0116.1	C_Znf423	77627	0.1042	24408	0.10484	24990	-0.08065	1.32613e-137
Mafb_MA0117.2	Mafb	MA0117.2	C_MAFF	74264	0.07252	16498	0.07028	15888	0.02384	9.26427e-86
NFICTLX1_MA0119.1	NFIC::TLX1	MA0119.1	C_NFIB	91680	0.10588	31012	0.10774	31955	-0.08732	5.13625e-142
Nkx3-2_MA0122.3	Nkx3-2	MA0122.3	C_ISL2	58770	0.05899	9084	0.0556	8326	0.06769	1.29371e-126
Nkx3-1_MA0124.2	Nkx3-1	MA0124.2	C_ISL2	55839	0.06825	10907	0.06563	10392	0.02297	1.00389e-73
Nobox_MA0125.1	Nobox	MA0125.1	C_Dlx2	34461	0.07259	6066	0.06802	5664	0.07083	3.37323e-111
ZNF354C_MA0130.1	ZNF354C	MA0130.1	C_ZNF354C	215514	0.09621	62733	0.09629	62678	-0.04968	7.84843e-141
HINFP_MA0131.2	HINFP	MA0131.2	C_HINFP	34399	0.25635	20265	0.26974	21289	-0.25165	7.16392e-165
PDX1_MA0132.2	PDX1	MA0132.2	C_ESX1	32623	0.06668	5606	0.06273	5417	0.0467	1.37969e-95
Lhx3_MA0135.1	Lhx3	MA0135.1	C_Lhx3	65448	0.04853	6052	0.04476	5570	0.11502	2.63445e-144
Elf5_MA0136.3	Elf5	MA0136.3	C_Elf5	204794	0.08332	52624	0.08076	51684	0.00977	8.28719e-67
STAT1_MA0137.3	STAT1	MA0137.3	C_Stat4	107020	0.07307	21545	0.07097	20984	0.02806	3.13081e-98
REST_MA0138.2	REST	MA0138.2	C_REST	129972	0.10568	42874	0.10763	43685	-0.09499	5.72922e-157
CTCF_MA0139.1	CTCF	MA0139.1	C_CTCF	162055	0.14125	67223	0.14282	68641	-0.09763	8.35311e-164
GATA1TAL1_MA0140.2	GATA1::TAL1	MA0140.2	C_GATA1::TAL1	59440	0.0677	11398	0.06583	10867	0.01723	1.44674e-61
ESRRB_MA0141.3	ESRRB	MA0141.3	C_NR5A1	76175	0.06971	16370	0.0674	15611	0.01388	1.87218e-63
Pou5f1Sox2_MA0142.1	Pou5f1::Sox2	MA0142.1	C_Pou5f1::Sox2	106008	0.05842	15358	0.05524	14253	0.07869	3.70421e-144
SOX2_MA0143.4	SOX2	MA0143.4	C_SOX13	74821	0.07736	15916	0.07524	15406	0.0288	2.16389e-88
STAT3_MA0144.2	STAT3	MA0144.2	C_Stat4	139033	0.07502	29171	0.07316	28642	0.02003	9.29725e-96
Tfcp2l1_MA0145.2	Tfcp2l1	MA0145.2	C_Tfcp2l1	117307	0.1189	41718	0.12135	42917	-0.10573	1.70091e-155
Zfx_MA0146.2	Zfx	MA0146.2	C_Zfx	139241	0.1771	63805	0.18365	66076	-0.15989	1.67309e-177
MYC_MA0147.3	MYC	MA0147.3	C_MYC	57482	0.12634	20400	0.12864	20698	-0.08742	1.71536e-131
FOXA1_MA0148.4	FOXA1	MA0148.4	C_FOXN3	81809	0.06109	12833	0.05814	12113	0.05923	3.1486e-121
EWSR1-FLI1_MA0149.1	EWSR1-FLI1	MA0149.1	C_EWSR1-FLI1	284012	0.08996	74768	0.09016	75995	-0.05332	4.51495e-145
Nfe2l2_MA0150.2	Nfe2l2	MA0150.2	C_MAFG::NFE2L1	99220	0.07937	24687	0.07759	23889	0.00056	0.159217
Arid3a_MA0151.1	Arid3a	MA0151.1	C_Arid3a	334755	0.05008	36282	0.04692	33987	0.09075	2.09943e-173
Nfatc2_MA0152.2	Nfatc2	MA0152.2	C_Nfatc2	119672	0.06431	20710	0.06135	19797	0.06032	1.65412e-135
HNF1B_MA0153.2	HNF1B	MA0153.2	C_HNF1A	35571	0.05167	3906	0.04758	3468	0.11446	7.20003e-135
EBF1_MA0154.4	EBF1	MA0154.4	C_EBF1	130422	0.10246	41605	0.1038	42541	-0.08503	4.45165e-148
INSM1_MA0155.1	INSM1	MA0155.1	C_INSM1	119334	0.11117	38305	0.11368	39412	-0.10289	1.29355e-156
FEV_MA0156.3	FEV	MA0156.3	C_ETS1	32928	0.21968	13917	0.22109	13936	-0.04775	6.52493e-93
Foxo3_MA0157.3	Foxo3	MA0157.3	C_FOXN3	69039	0.06776	12660	0.06497	12108	0.04145	9.83214e-102
HOXA5_MA0158.2	HOXA5	MA0158.2	C_HOXA5	32679	0.06863	6028	0.06495	5873	0.03587	3.97738e-85
RARARXRA_MA0159.1	RARA::RXRA	MA0159.1	C_RARA::RXRA	86715	0.0917	24511	0.09143	24439	-0.04827	3.28204e-114
NR4A2_MA0160.2	NR4A2	MA0160.2	C_NR4A1	83795	0.0673	16003	0.06456	15306	0.03966	3.54008e-103
NFIC_MA0161.2	NFIC	MA0161.2	C_NFIX	106134	0.09157	31169	0.09178	31171	-0.04211	1.9893e-108
EGR1_MA0162.4	EGR1	MA0162.4	C_EGR1	200671	0.18109	84558	0.19035	89051	-0.18889	2.71196e-189
PLAG1_MA0163.1	PLAG1	MA0163.1	C_PLAG1	164068	0.12845	59750	0.1325	62594	-0.14258	1.8986e-178
Nr2e3_MA0164.1	Nr2e3	MA0164.1	C_Nr2e3	42625	0.07496	9274	0.07262	9032	0.00708	5.85246e-32
ESR2_MA0258.2	ESR2	MA0258.2	C_ESR2	126642	0.08988	36738	0.08983	36813	-0.06635	6.36726e-143
ARNTHIF1A_MA0259.1	ARNT::HIF1A	MA0259.1	C_ARNT::HIF1A	27743	0.11915	9240	0.12068	9308	-0.08006	1.80091e-113
SOX10_MA0442.2	SOX10	MA0442.2	C_SOX4	139391	0.07996	31344	0.07908	31537	-0.00126	6.47375e-06
Atoh1_MA0461.2	Atoh1	MA0461.2	C_ATOH7	50253	0.06111	8754	0.05903	8119	0.03413	4.45343e-88
BATFJUN_MA0462.2	BATF::JUN	MA0462.2	C_FOSL1::JUN	83377	0.06991	17938	0.06704	16678	0.05164	4.31283e-118
BCL6_MA0463.2	BCL6	MA0463.2	C_BCL6	74593	0.07258	15452	0.07093	15255	-0.00423	1.25557e-19
BHLHE40_MA0464.2	BHLHE40	MA0464.2	C_MYC	26106	0.14516	8897	0.14686	8920	-0.06751	6.16495e-102
CDX2_MA0465.2	CDX2	MA0465.2	C_CDX2	77609	0.05502	9368	0.05173	8759	0.08532	3.94026e-139
CEBPB_MA0466.3	CEBPB	MA0466.3	C_CEBPB	6417	0.10845	1681	0.10298	1617	0.0743	6.04204e-85
Crx_MA0467.2	Crx	MA0467.2	C_OTX2	54578	0.06418	9524	0.06228	9323	-0.00624	3.71234e-25
DUX4_MA0468.1	DUX4	MA0468.1	C_DUX4	53096	0.0592	7087	0.05555	6636	0.07998	1.47429e-125
E2F3_MA0469.3	E2F3	MA0469.3	C_E2F3	7517	0.09347	1846	0.08947	1765	0.06781	7.13664e-76
E2F4_MA0470.2	E2F4	MA0470.2	C_ZNF417	9656	0.18705	4410	0.18845	4493	-0.08822	5.77531e-93
E2F6_MA0471.2	E2F6	MA0471.2	C_E2F6	188683	0.16425	76493	0.17016	79554	-0.14604	4.44578e-179
EGR2_MA0472.2	EGR2	MA0472.2	C_EGR1	61147	0.19374	26430	0.20221	27254	-0.14619	1.3367e-164
ELF1_MA0473.3	ELF1	MA0473.3	C_Erg	180182	0.1014	53672	0.09948	52733	-0.00869	1.18096e-62
Erg_MA0474.3	Erg	MA0474.3	C_Erg	191423	0.09843	56198	0.09622	55044	-0.00136	1.87453e-09
FLI1_MA0475.2	FLI1	MA0475.2	C_ETS1	36878	0.18484	13853	0.18458	13672	-0.02216	2.48976e-69
FOS_MA0476.1	FOS	MA0476.1	C_FOSL1::JUN	81005	0.06916	17174	0.06622	15949	0.05341	2.75927e-116
FOSL1_MA0477.2	FOSL1	MA0477.2	C_FOSL1::JUN	74320	0.07022	16082	0.06736	15019	0.04974	3.37947e-114
FOSL2_MA0478.1	FOSL2	MA0478.1	C_FOSL1::JUN	110181	0.06869	22487	0.0665	21350	0.00566	5.39912e-34
FOXH1_MA0479.1	FOXH1	MA0479.1	C_FOXH1	71984	0.06772	13634	0.0645	12885	0.04442	9.28047e-105
Foxo1_MA0480.2	Foxo1	MA0480.2	C_FOXN3	77787	0.07228	16383	0.06983	15782	0.0221	1.91133e-82
FOXP1_MA0481.3	FOXP1	MA0481.3	C_FOXN3	77226	0.06326	12738	0.06038	12071	0.05516	2.82014e-120
GATA4_MA0482.2	GATA4	MA0482.2	C_Gata3	63880	0.06054	10448	0.05811	10014	0.03309	4.43688e-92
Gfi1B_MA0483.1	Gfi1B	MA0483.1	C_Gfi1B	117991	0.07082	23558	0.06904	22994	0.01	1.37844e-57
HNF4G_MA0484.2	HNF4G	MA0484.2	C_HNF4G	92683	0.07804	22230	0.0762	21732	0.00044	0.734378
HOXC9_MA0485.2	HOXC9	MA0485.2	C_HOXC10	24504	0.05701	3301	0.05381	3032	0.08962	4.34386e-113
HSF1_MA0486.2	HSF1	MA0486.2	C_HSF4	59428	0.06996	11523	0.0665	10908	0.05957	2.88159e-118
JUN_MA0488.1	JUN	MA0488.1	C_FOSL1::JUN	69841	0.0888	16527	0.08599	15692	0.03133	4.93893e-94
Jun_MA0489.2	Jun	MA0489.2	C_FOSL1::JUN	77279	0.07175	17385	0.06897	16267	0.04595	4.69358e-112
JUNB_MA0490.2	JUNB	MA0490.2	C_FOSL1::JUN	75710	0.06932	15944	0.06637	14829	0.05341	4.95808e-118
JUND_MA0491.2	JUND	MA0491.2	C_FOSL1::JUN	71326	0.06927	14991	0.06635	13903	0.05483	1.62001e-114
JUND_MA0492.1	JUND	MA0492.1	C_FOSL1::JUN	60066	0.09299	14284	0.08963	13536	0.03641	2.64771e-94
KLF1_MA0493.2	KLF1	MA0493.2	C_KLF4	251713	0.17274	98577	0.17813	101735	-0.13442	1.79943e-181
Nr1h3Rxra_MA0494.1	Nr1h3::Rxra	MA0494.1	C_Nr1h3::Rxra	79719	0.08495	21649	0.08391	21217	-0.02428	1.11502e-83
MAFF_MA0495.3	MAFF	MA0495.3	C_MAFF	93315	0.06514	17767	0.06232	16945	0.04562	7.01673e-110
MAFK_MA0496.3	MAFK	MA0496.3	C_MAFK	119888	0.08273	31504	0.08136	30774	-0.0131	1.94459e-69
MEF2C_MA0497.1	MEF2C	MA0497.1	C_MEF2A	142180	0.05233	17159	0.04873	15877	0.1109	1.16317e-167
MEIS1_MA0498.2	MEIS1	MA0498.2	C_MEIS1	49983	0.07221	9928	0.0707	9717	0.01469	2.18646e-53
MYOD1_MA0499.2	MYOD1	MA0499.2	C_MYOD1	147869	0.08728	41275	0.08979	42416	-0.09598	8.06497e-154
MYOG_MA0500.2	MYOG	MA0500.2	C_Tcf12	106739	0.10115	35055	0.10644	36985	-0.14536	1.9462e-169
MAFNFE2_MA0501.1	MAF::NFE2	MA0501.1	C_MAFG::NFE2L1	98298	0.07107	21518	0.06874	20564	0.02376	2.12322e-88
NFYB_MA0502.2	NFYB	MA0502.2	C_NFYB	70768	0.16959	23190	0.17052	23292	-0.04896	3.98822e-112
NR2C2_MA0504.1	NR2C2	MA0504.1	C_NR2C2	153918	0.10656	47305	0.10846	48760	-0.09955	1.40452e-158
Nr5A2_MA0505.2	Nr5A2	MA0505.2	C_NR5A1	128332	0.07364	29841	0.07235	29035	-0.02791	1.00209e-102
Nrf1_MA0506.2	Nrf1	MA0506.2	C_Nrf1	73922	0.27037	41311	0.28537	43400	-0.2515	4.30192e-179
POU2F2_MA0507.2	POU2F2	MA0507.2	C_POU1F1	83440	0.05805	10931	0.05493	10142	0.09814	1.4002e-146
PRDM1_MA0508.3	PRDM1	MA0508.3	C_PRDM1	177561	0.07066	36129	0.06984	36077	-0.01595	5.10853e-85
RFX1_MA0509.3	RFX1	MA0509.3	C_RFX3	41073	0.09434	10545	0.09398	10395	-0.01236	1.70162e-44
RFX5_MA0510.2	RFX5	MA0510.2	C_RFX3	44980	0.09595	11757	0.09583	11746	-0.01834	7.60777e-61
RUNX2_MA0511.2	RUNX2	MA0511.2	C_Bcl11B	37394	0.08312	9060	0.08155	8969	-0.00301	2.3287e-05
Rxra_MA0512.2	Rxra	MA0512.2	C_NR2C2	82428	0.0762	18867	0.07427	18535	-0.0082	4.14778e-40
Sox3_MA0514.2	Sox3	MA0514.2	C_SOX13	72869	0.08488	17621	0.08317	17207	0.00741	5.30499e-39
Sox6_MA0515.1	Sox6	MA0515.1	C_Sox6	129524	0.08122	29461	0.07979	29257	0.00645	9.21496e-41
SP2_MA0516.3	SP2	MA0516.3	C_PATZ1	201593	0.23577	94393	0.24462	98350	-0.17986	2.27409e-190
STAT1STAT2_MA0517.1	STAT1::STAT2	MA0517.1	C_STAT1::STAT2	185159	0.06343	31529	0.06077	31030	0.04428	3.06269e-126
Stat4_MA0518.1	Stat4	MA0518.1	C_Stat4	124562	0.07422	25946	0.07221	25404	0.0233	2.78967e-90
Stat5aStat5b_MA0519.1	Stat5a::Stat5b	MA0519.1	C_Stat5b	113284	0.07547	24206	0.07319	23413	0.03009	3.62481e-102
Stat6_MA0520.1	Stat6	MA0520.1	C_Stat6	96233	0.06527	17242	0.06245	16597	0.05862	1.44414e-121
Tcf12_MA0521.2	Tcf12	MA0521.2	C_Tcf12	109557	0.10247	36307	0.10732	38073	-0.13798	3.87254e-165
TCF3_MA0522.3	TCF3	MA0522.3	C_ASCL1	117415	0.12573	40202	0.13059	41960	-0.13446	3.35862e-168
TCF7L2_MA0523.1	TCF7L2	MA0523.1	C_Lef1	108999	0.06558	20592	0.0633	19914	0.03665	1.78808e-110
TFAP2C_MA0524.2	TFAP2C	MA0524.2	C_TFAP2A	80546	0.1464	33174	0.15158	34467	-0.14689	1.84109e-159
TP63_MA0525.2	TP63	MA0525.2	C_TP63	35488	0.07387	6704	0.0708	6257	0.04891	2.1351e-101
USF2_MA0526.4	USF2	MA0526.4	C_BHLHE41	23460	0.14466	7989	0.1451	7940	-0.04602	4.17905e-83
ZBTB33_MA0527.1	ZBTB33	MA0527.1	C_ZBTB33	20433	0.28033	12136	0.29278	12703	-0.23435	4.64868e-153
ZNF263_MA0528.2	ZNF263	MA0528.2	C_SP5	252236	0.13902	93139	0.14297	95977	-0.11669	2.00474e-173
Bach1Mafk_MA0591.1	Bach1::Mafk	MA0591.1	C_MAFK	110421	0.08904	30772	0.08857	30563	-0.03173	5.33049e-99
ESRRA_MA0592.3	ESRRA	MA0592.3	C_NR5A1	101700	0.07528	24429	0.07357	23761	-0.01095	4.69987e-61
FOXP2_MA0593.1	FOXP2	MA0593.1	C_FOXN3	112143	0.0647	19576	0.06206	18842	0.04507	1.32691e-118
HOXA9_MA0594.2	HOXA9	MA0594.2	C_HOXA9	5929	0.1006	1442	0.09863	1403	0.00422	0.12417
SREBF1_MA0595.1	SREBF1	MA0595.1	C_SREBF1	69074	0.0927	18920	0.09192	18700	-0.03335	1.953e-95
SREBF2_MA0596.1	SREBF2	MA0596.1	C_SREBF1	73025	0.08173	18560	0.08069	18163	-0.02268	2.16107e-82
THAP1_MA0597.2	THAP1	MA0597.2	C_THAP1	164869	0.12739	61726	0.1313	63774	-0.12733	3.08974e-169
EHF_MA0598.3	EHF	MA0598.3	C_Erg	164916	0.09835	47711	0.09572	46477	0.00961	4.96922e-73
KLF5_MA0599.1	KLF5	MA0599.1	C_KLF4	295781	0.16827	112569	0.1729	116058	-0.12744	3.51817e-186
RFX2_MA0600.2	RFX2	MA0600.2	C_RFX3	40599	0.0942	10347	0.09386	10152	-0.01301	4.10693e-46
Arid3b_MA0601.1	Arid3b	MA0601.1	C_Arid3b	63452	0.05197	5804	0.04704	5370	0.11743	2.52908e-150
Arid5a_MA0602.1	Arid5a	MA0602.1	C_Arid5a	38979	0.05273	3669	0.04758	3350	0.12374	1.57119e-142
Arntl_MA0603.1	Arntl	MA0603.1	C_MYC	29155	0.14108	9972	0.14243	10059	-0.06527	9.29496e-109
Atf1_MA0604.1	Atf1	MA0604.1	C_Atf1	15857	0.19824	5653	0.19978	5510	-0.03994	7.03179e-73
ATF3_MA0605.2	ATF3	MA0605.2	C_FOSL1::JUN	23515	0.138	7217	0.13636	6979	-0.00323	0.000183434
Nfat5_MA0606.2	Nfat5	MA0606.2	C_Nfat5	139342	0.05952	21090	0.05615	19904	0.0794	5.48438e-151
BHLHA15_MA0607.2	BHLHA15	MA0607.2	C_ATOH7	39983	0.05746	6113	0.05563	5726	0.01326	4.04249e-44
Creb3l2_MA0608.1	Creb3l2	MA0608.1	C_Creb3l2	26247	0.13694	8603	0.13786	8566	-0.06112	4.64455e-101
CREM_MA0609.2	CREM	MA0609.2	C_FOSL1::JUN	30044	0.14182	10078	0.14187	9917	-0.04078	7.6483e-82
DMRT3_MA0610.1	DMRT3	MA0610.1	C_DMRT3	47593	0.05613	7095	0.05308	6420	0.06933	2.87663e-116
Dux_MA0611.2	Dux	MA0611.2	C_Dux	36366	0.05778	5340	0.05468	4941	0.08308	1.52104e-123
EMX1_MA0612.2	EMX1	MA0612.2	C_ESX1	16857	0.07551	3170	0.06991	3104	0.03984	4.37383e-73
FOXG1_MA0613.1	FOXG1	MA0613.1	C_FOXN3	83143	0.0603	12577	0.05741	11846	0.06007	7.87448e-124
Foxj2_MA0614.1	Foxj2	MA0614.1	C_FOXN3	58381	0.06284	9240	0.05991	8763	0.0596	9.5913e-119
Gmeb1_MA0615.1	Gmeb1	MA0615.1	C_Gmeb1	9308	0.22288	4097	0.22969	4204	-0.12399	1.55298e-106
HES2_MA0616.2	HES2	MA0616.2	C_MYC	34510	0.1997	14937	0.20778	15398	-0.14634	6.76733e-146
LBX1_MA0618.1	LBX1	MA0618.1	C_PAX4	44921	0.06027	6752	0.05655	6497	0.0662	1.71413e-114
LIN54_MA0619.1	LIN54	MA0619.1	C_LIN54	84864	0.05124	9267	0.04768	8599	0.11607	5.09915e-155
MITF_MA0620.3	MITF	MA0620.3	C_BHLHE41	33681	0.11327	9619	0.11204	9371	-0.00699	7.09212e-20
mix-a_MA0621.1	mix-a	MA0621.1	C_ARGFX	45696	0.05673	5721	0.05261	5440	0.08404	5.86354e-127
Mlxip_MA0622.1	Mlxip	MA0622.1	C_MYC	36072	0.11846	11378	0.11899	11281	-0.05382	3.18033e-105
NEUROG1_MA0623.2	NEUROG1	MA0623.2	C_ATOH7	34480	0.05844	5610	0.05554	5038	0.05609	4.97878e-98
Nfatc1_MA0624.2	Nfatc1	MA0624.2	C_Nfatc2	121370	0.06384	21160	0.06104	20209	0.05872	6.66919e-135
NFATC3_MA0625.2	NFATC3	MA0625.2	C_Nfatc2	71545	0.07095	13793	0.06795	13171	0.05888	8.45162e-123
Npas2_MA0626.1	Npas2	MA0626.1	C_MYC	33475	0.11272	10387	0.11303	10261	-0.05408	6.99593e-98
POU2F3_MA0627.2	POU2F3	MA0627.2	C_POU2F3	100473	0.05684	12987	0.05383	12008	0.0893	1.93665e-147
POU6F1_MA0628.1	POU6F1	MA0628.1	C_EMX2	22410	0.06634	3275	0.0607	3139	0.07591	9.72043e-108
Rhox11_MA0629.1	Rhox11	MA0629.1	C_Rhox11	43714	0.07115	9189	0.0691	8830	0.01081	1.14644e-40
SHOX_MA0630.1	SHOX	MA0630.1	C_PAX4	35593	0.07103	6123	0.06677	5899	0.05922	3.0567e-103
Six3_MA0631.1	Six3	MA0631.1	C_Six3	34377	0.06036	5667	0.05818	5337	0.03411	1.20867e-83
TCFL5_MA0632.2	TCFL5	MA0632.2	C_TCFL5	35856	0.26084	19547	0.27512	20467	-0.2368	1.94936e-167
Twist2_MA0633.2	Twist2	MA0633.2	C_Tcf12	118036	0.10403	39720	0.10952	41939	-0.15037	4.78694e-170
ALX3_MA0634.1	ALX3	MA0634.1	C_PAX4	45736	0.06467	7029	0.06027	6802	0.06285	1.77238e-114
BARHL2_MA0635.1	BARHL2	MA0635.1	C_BARHL2	18079	0.06891	3354	0.06618	3244	0.05224	1.00277e-91
BHLHE41_MA0636.1	BHLHE41	MA0636.1	C_BHLHE41	22013	0.15031	7724	0.15176	7774	-0.06114	2.07571e-93
CREB3_MA0638.1	CREB3	MA0638.1	C_CREB3L4	24992	0.14692	8267	0.14834	8171	-0.05288	1.3666e-94
DBP_MA0639.1	DBP	MA0639.1	C_NFIL3	23094	0.07267	4074	0.06675	3500	0.15141	4.91085e-137
ELF3_MA0640.2	ELF3	MA0640.2	C_Erg	193736	0.09575	56000	0.09381	54994	-0.00657	2.99447e-41
ELF4_MA0641.1	ELF4	MA0641.1	C_Erg	49279	0.16468	18016	0.16462	17832	-0.02972	2.57926e-85
EN2_MA0642.2	EN2	MA0642.2	C_DLX6	39786	0.07351	7133	0.06954	6808	0.05831	5.30662e-106
Esrrg_MA0643.1	Esrrg	MA0643.1	C_NR5A1	71421	0.07181	16281	0.07015	15679	-0.00509	3.01738e-26
ESX1_MA0644.2	ESX1	MA0644.2	C_ESX1	39568	0.07395	7159	0.06951	6915	0.05409	3.7894e-111
ETV6_MA0645.1	ETV6	MA0645.1	C_Spi1	61834	0.16059	23316	0.15947	23055	-0.02019	1.20095e-68
GCM1_MA0646.1	GCM1	MA0646.1	C_GCM2	51511	0.09842	15238	0.09985	15404	-0.06676	2.63343e-113
GRHL1_MA0647.1	GRHL1	MA0647.1	C_GRHL2	29174	0.06427	5070	0.06189	4930	0.04132	1.80007e-89
GSC_MA0648.1	GSC	MA0648.1	C_OTX2	31006	0.07448	6504	0.0722	6397	0.00644	2.1658e-21
HEY2_MA0649.1	HEY2	MA0649.1	C_MYC	36251	0.13589	12640	0.13869	12868	-0.08973	1.25994e-127
Hoxa13_MA0650.3	Hoxa13	MA0650.3	C_HOXB13	75435	0.0579	9267	0.05444	8801	0.07742	2.9764e-134
HOXC11_MA0651.2	HOXC11	MA0651.2	C_HOXC10	19973	0.06223	3113	0.05947	2913	0.07103	1.08197e-100
IRF8_MA0652.1	IRF8	MA0652.1	C_Irf1	48476	0.07573	10031	0.07369	9983	0.01909	3.31348e-66
IRF9_MA0653.1	IRF9	MA0653.1	C_Irf1	64719	0.06857	11385	0.06598	11351	0.03482	5.34666e-97
ISX_MA0654.1	ISX	MA0654.1	C_PAX4	42838	0.06929	7344	0.06519	7033	0.06179	2.23098e-110
JDP2_MA0655.1	JDP2	MA0655.1	C_FOSL1::JUN	60143	0.06353	11006	0.0603	10030	0.06993	5.56385e-128
JDP2_MA0656.1	JDP2	MA0656.1	C_FOSL1::JUN	29940	0.12389	8563	0.12177	8274	0.01206	1.37232e-39
KLF13_MA0657.1	KLF13	MA0657.1	C_KLF13	62328	0.18816	23453	0.19167	23877	-0.09408	1.41208e-143
LHX6_MA0658.1	LHX6	MA0658.1	C_EMX2	26794	0.06721	4325	0.06222	4161	0.06176	2.30954e-103
Mafg_MA0659.3	Mafg	MA0659.3	C_MAFK	126709	0.08207	32899	0.08128	32321	-0.03167	5.51832e-104
MEF2B_MA0660.1	MEF2B	MA0660.1	C_MEF2A	67310	0.05755	9355	0.05322	8467	0.11626	4.98328e-148
MEOX1_MA0661.1	MEOX1	MA0661.1	C_EMX2	35277	0.06591	6106	0.06228	5978	0.04292	1.73438e-87
MIXL1_MA0662.1	MIXL1	MA0662.1	C_PAX4	35869	0.07085	6340	0.06686	6157	0.05533	1.01991e-100
MLX_MA0663.1	MLX	MA0663.1	C_MYC	22097	0.1418	7286	0.14229	7218	-0.03511	9.84289e-71
MLXIPL_MA0664.1	MLXIPL	MA0664.1	C_MYC	23069	0.13709	7610	0.13781	7551	-0.044	9.49864e-86
MSC_MA0665.1	MSC	MA0665.1	C_MSC	110050	0.08281	28730	0.08347	29228	-0.05927	7.65991e-132
MSX1_MA0666.2	MSX1	MA0666.2	C_DLX6	39206	0.07251	7165	0.06884	6791	0.05201	9.94269e-100
MYF6_MA0667.1	MYF6	MA0667.1	C_Tcf21	64318	0.07307	14438	0.07255	14382	-0.01751	5.04701e-68
Neurod2_MA0668.2	Neurod2	MA0668.2	C_Neurod2	156713	0.08315	41488	0.08438	42103	-0.06155	3.59145e-139
NEUROG2_MA0669.1	NEUROG2	MA0669.1	C_ATOH7	57223	0.06536	11164	0.06367	10775	0.01788	1.02786e-67
NFIA_MA0670.1	NFIA	MA0670.1	C_NFIX	87488	0.08142	22763	0.08125	22671	-0.01915	1.39547e-73
NFIX_MA0671.1	NFIX	MA0671.1	C_NFIX	94279	0.09214	27614	0.09313	27914	-0.05207	1.36986e-117
NKX2-3_MA0672.1	NKX2-3	MA0672.1	C_NKX2-3	74018	0.0741	16648	0.07214	16140	0.00825	1.20815e-38
NKX2-8_MA0673.1	NKX2-8	MA0673.1	C_NKX2-3	64370	0.07264	14065	0.07077	13647	0.0141	3.54427e-58
NKX6-1_MA0674.1	NKX6-1	MA0674.1	C_LHX5	52155	0.05829	7957	0.05541	7632	0.06532	1.64633e-118
NKX6-2_MA0675.1	NKX6-2	MA0675.1	C_LHX5	51985	0.05932	8036	0.05629	7680	0.06645	1.20139e-120
Nr2e1_MA0676.1	Nr2e1	MA0676.1	C_Nr2e1	69409	0.05883	10492	0.05575	9889	0.05995	2.53437e-121
Nr2f6_MA0677.1	Nr2f6	MA0677.1	C_NR2C2	89555	0.07853	21458	0.07685	21153	-0.01502	4.92058e-70
OLIG2_MA0678.1	OLIG2	MA0678.1	C_ATOH7	33142	0.05441	4482	0.05109	3927	0.08447	8.01264e-124
ONECUT1_MA0679.2	ONECUT1	MA0679.2	C_ONECUT1	78011	0.04781	7077	0.04439	6554	0.09083	9.14436e-141
Pax7_MA0680.2	Pax7	MA0680.2	C_Pax7	50992	0.04852	4665	0.04461	4206	0.12302	4.12892e-146
PHOX2B_MA0681.2	PHOX2B	MA0681.2	C_PHOX2A	91801	0.04622	6760	0.04183	6060	0.13235	1.03142e-161
PITX1_MA0682.2	PITX1	MA0682.2	C_OTX2	51062	0.06599	9259	0.06409	9080	-0.01452	3.52855e-55
POU4F2_MA0683.1	POU4F2	MA0683.1	C_POU4F2	73476	0.0525	8270	0.04887	7615	0.11027	7.76516e-148
RUNX3_MA0684.2	RUNX3	MA0684.2	C_RUNX3	78118	0.07081	15998	0.0682	15366	0.01725	3.49642e-70
SP4_MA0685.2	SP4	MA0685.2	C_PATZ1	256846	0.192	108974	0.19946	114054	-0.16973	2.67351e-191
SPDEF_MA0686.1	SPDEF	MA0686.1	C_SPDEF	28213	0.15386	9821	0.15471	9874	-0.04901	2.78685e-96
SPIC_MA0687.1	SPIC	MA0687.1	C_SPIC	103819	0.07685	23226	0.07356	22516	0.04026	3.82182e-113
TBX2_MA0688.1	TBX2	MA0688.1	C_TBX18	70879	0.06422	13275	0.06202	12547	0.02325	1.10561e-84
TBX20_MA0689.1	TBX20	MA0689.1	C_TBX18	75050	0.06634	14243	0.06379	13479	0.02355	1.04281e-79
TBX21_MA0690.2	TBX21	MA0690.2	C_TBX18	69666	0.06615	13385	0.06395	12810	0.0177	1.04576e-72
TFAP4_MA0691.1	TFAP4	MA0691.1	C_TFAP4	88738	0.089	25754	0.09013	26094	-0.06981	3.52699e-133
TFEB_MA0692.1	TFEB	MA0692.1	C_BHLHE41	47014	0.11175	13686	0.11104	13538	-0.02672	7.64436e-76
Vdr_MA0693.3	Vdr	MA0693.3	C_Vdr	93888	0.06545	17649	0.0632	16946	0.00165	9.00454e-08
ZBTB7B_MA0694.1	ZBTB7B	MA0694.1	C_ZBTB7B	56856	0.11349	18125	0.11642	18664	-0.10353	5.42647e-142
ZBTB7C_MA0695.1	ZBTB7C	MA0695.1	C_ZBTB7B	64739	0.11794	21620	0.12145	22301	-0.11347	9.56987e-149
ZIC1_MA0696.1	ZIC1	MA0696.1	C_ZIC5	103445	0.15057	44437	0.15615	46148	-0.15564	3.37103e-171
Zic3_MA0697.2	Zic3	MA0697.2	C_Zic2	208222	0.11464	73697	0.11759	75754	-0.11163	4.12283e-171
ZBTB18_MA0698.1	ZBTB18	MA0698.1	C_TWIST1	127463	0.07309	29700	0.07307	29539	-0.03621	5.94476e-111
LBX2_MA0699.1	LBX2	MA0699.1	C_PAX4	34143	0.07633	6484	0.07194	6292	0.04847	6.49321e-101
LHX2_MA0700.2	LHX2	MA0700.2	C_DLX6	43432	0.0693	6826	0.06473	6444	0.07659	5.54257e-117
LHX9_MA0701.2	LHX9	MA0701.2	C_PAX4	35593	0.07103	6123	0.06677	5899	0.05918	3.26399e-103
LMX1A_MA0702.2	LMX1A	MA0702.2	C_ARGFX	33834	0.05598	4622	0.05263	4405	0.07181	2.00932e-116
LMX1B_MA0703.2	LMX1B	MA0703.2	C_ARGFX	51455	0.05076	5776	0.04739	5370	0.09467	9.06956e-136
Lhx4_MA0704.1	Lhx4	MA0704.1	C_ARGFX	27053	0.05338	3479	0.05011	3308	0.08336	8.70434e-118
Lhx8_MA0705.1	Lhx8	MA0705.1	C_PAX4	34655	0.06827	5987	0.06403	5801	0.04575	3.5754e-94
MEOX2_MA0706.1	MEOX2	MA0706.1	C_LHX5	43031	0.05922	6271	0.05572	6151	0.06522	3.00382e-120
MNX1_MA0707.2	MNX1	MA0707.2	C_MNX1	38490	0.06111	5315	0.05692	5130	0.07085	6.67633e-119
MSX2_MA0708.2	MSX2	MA0708.2	C_DLX6	46789	0.07045	8285	0.06676	7819	0.05936	1.37479e-112
Msx3_MA0709.1	Msx3	MA0709.1	C_DLX6	39206	0.07251	7165	0.06884	6791	0.05202	9.75697e-100
NOTO_MA0710.1	NOTO	MA0710.1	C_EMX2	37175	0.07222	7277	0.06873	7120	0.0373	2.02246e-84
OTX1_MA0711.1	OTX1	MA0711.1	C_OTX2	31179	0.06567	5394	0.06446	5382	-0.03672	3.5753e-83
OTX2_MA0712.2	OTX2	MA0712.2	C_OTX2	63271	0.06259	10499	0.06026	10123	0.00554	6.03412e-29
PHOX2A_MA0713.1	PHOX2A	MA0713.1	C_PHOX2A	44893	0.05122	4562	0.0472	4202	0.10958	5.82979e-137
PITX3_MA0714.1	PITX3	MA0714.1	C_OTX2	47965	0.06733	8408	0.06498	8336	-0.01211	2.83649e-45
PROP1_MA0715.1	PROP1	MA0715.1	C_PHOX2A	51834	0.0496	4454	0.04496	4044	0.12259	9.26258e-147
PRRX1_MA0716.1	PRRX1	MA0716.1	C_PAX4	35593	0.07103	6123	0.06677	5899	0.05922	3.0567e-103
RAX2_MA0717.1	RAX2	MA0717.1	C_PAX4	35593	0.07103	6123	0.06677	5899	0.05922	3.0567e-103
RAX_MA0718.1	RAX	MA0718.1	C_GBX2	34222	0.07071	6046	0.06684	5757	0.06374	1.70575e-111
RHOXF1_MA0719.1	RHOXF1	MA0719.1	C_OTX2	58274	0.06693	10856	0.0655	10681	-0.02262	3.75777e-79
Shox2_MA0720.1	Shox2	MA0720.1	C_PAX4	35593	0.07103	6123	0.06677	5899	0.05922	3.0567e-103
UNCX_MA0721.1	UNCX	MA0721.1	C_PAX4	35593	0.07103	6123	0.06677	5899	0.05922	3.0567e-103
VAX1_MA0722.1	VAX1	MA0722.1	C_ESX1	38164	0.06216	5711	0.05801	5555	0.06139	1.59047e-113
VAX2_MA0723.2	VAX2	MA0723.2	C_ESX1	25933	0.08249	5340	0.07738	5172	0.03836	3.7476e-77
VENTX_MA0724.1	VENTX	MA0724.1	C_VENTX	23856	0.07536	4445	0.0703	4212	0.0556	3.58004e-91
VSX1_MA0725.1	VSX1	MA0725.1	C_PAX4	39571	0.06293	6074	0.05859	5919	0.06385	5.62627e-109
VSX2_MA0726.1	VSX2	MA0726.1	C_PAX4	39571	0.06293	6074	0.05859	5919	0.06385	5.62627e-109
NR3C2_MA0727.1	NR3C2	MA0727.1	C_Ar	46422	0.08705	12573	0.07793	11059	0.11451	2.51413e-138
Nr2F6_MA0728.1	Nr2F6	MA0728.1	C_Nr2F6	83970	0.07212	17556	0.07	17147	-0.01395	9.13907e-65
RARA_MA0729.1	RARA	MA0729.1	C_RARA	77694	0.06677	14954	0.06469	14377	0.00405	3.45523e-21
RARA_MA0730.1	RARA	MA0730.1	C_RARA	76882	0.0866	20860	0.08567	20785	-0.03927	8.38686e-108
BCL6B_MA0731.1	BCL6B	MA0731.1	C_BCL6B	88286	0.06615	16074	0.06405	15662	0.01229	2.47729e-58
EGR3_MA0732.1	EGR3	MA0732.1	C_EGR1	103427	0.19303	44997	0.20258	47144	-0.18206	2.16546e-177
EGR4_MA0733.1	EGR4	MA0733.1	C_EGR1	119360	0.16774	46531	0.17492	48743	-0.15838	4.52062e-172
Gli2_MA0734.3	Gli2	MA0734.3	C_Gli2	126996	0.10864	41220	0.11026	41907	-0.08392	2.56991e-144
GLIS1_MA0735.1	GLIS1	MA0735.1	C_GLIS1	42001	0.1262	14429	0.12872	14881	-0.10658	6.37423e-127
GLIS2_MA0736.1	GLIS2	MA0736.1	C_GLIS2	76587	0.14416	30193	0.15018	31800	-0.16672	5.25342e-170
GLIS3_MA0737.1	GLIS3	MA0737.1	C_GLIS2	60585	0.10816	18816	0.11011	19344	-0.09475	1.61192e-144
HIC2_MA0738.1	HIC2	MA0738.1	C_HIC2	87757	0.10045	27005	0.10175	27401	-0.07384	5.61392e-132
Hic1_MA0739.1	Hic1	MA0739.1	C_Hic1	94577	0.09115	26755	0.09203	27126	-0.05778	1.50731e-129
KLF14_MA0740.2	KLF14	MA0740.2	C_KLF4	250834	0.18623	101874	0.19235	105371	-0.14405	1.09496e-189
KLF16_MA0741.1	KLF16	MA0741.1	C_KLF9	228030	0.18206	90134	0.18853	93742	-0.1502	1.37442e-185
KLF12_MA0742.2	KLF12	MA0742.2	C_PATZ1	222290	0.21954	102814	0.2288	108086	-0.1983	1.31448e-199
SCRT1_MA0743.2	SCRT1	MA0743.2	C_SCRT2	72824	0.07541	17105	0.0739	16777	-0.00988	3.79336e-48
SCRT2_MA0744.2	SCRT2	MA0744.2	C_SCRT2	77883	0.07877	19005	0.07756	18693	-0.01772	3.10268e-74
SNAI2_MA0745.2	SNAI2	MA0745.2	C_ASCL1	117950	0.07369	27242	0.07399	27355	-0.05927	3.84756e-130
SP3_MA0746.2	SP3	MA0746.2	C_KLF9	191248	0.2128	81332	0.22025	84385	-0.15976	1.27876e-180
SP8_MA0747.1	SP8	MA0747.1	C_KLF9	200750	0.16963	75463	0.17512	78334	-0.13957	5.87365e-179
YY2_MA0748.2	YY2	MA0748.2	C_YY2	35810	0.2325	18972	0.24308	19691	-0.20802	2.77162e-156
ZBED1_MA0749.1	ZBED1	MA0749.1	C_ZBED1	5960	0.11941	1659	0.11878	1595	-0.01241	1.67057e-15
ZBTB7A_MA0750.2	ZBTB7A	MA0750.2	C_ETS1	91367	0.18213	38869	0.18509	39443	-0.09377	1.0027e-145
ZIC4_MA0751.1	ZIC4	MA0751.1	C_ZIC5	99486	0.16167	44932	0.16805	46806	-0.17208	2.36732e-177
ZNF410_MA0752.1	ZNF410	MA0752.1	C_ZNF410	46835	0.06324	7579	0.06063	7131	0.04539	7.99503e-97
ZNF740_MA0753.2	ZNF740	MA0753.2	C_ZNF740	206416	0.14367	75751	0.14933	79224	-0.15202	4.73836e-186
CUX1_MA0754.2	CUX1	MA0754.2	C_ONECUT1	15625	0.0543	1920	0.05071	1729	0.10581	1.46353e-109
CUX2_MA0755.1	CUX2	MA0755.1	C_ONECUT1	13738	0.05371	1729	0.05011	1560	0.10579	2.27404e-110
ONECUT2_MA0756.2	ONECUT2	MA0756.2	C_ONECUT2	11221	0.068	1909	0.06349	1777	0.06674	1.00204e-87
ONECUT3_MA0757.1	ONECUT3	MA0757.1	C_ONECUT1	66027	0.04734	5832	0.044	5435	0.09063	3.3396e-135
E2F7_MA0758.1	E2F7	MA0758.1	C_E2F7	39854	0.08092	8784	0.07797	8466	0.04911	1.26696e-100
ELK3_MA0759.2	ELK3	MA0759.2	C_ETS1	26842	0.28235	13246	0.28745	13458	-0.10574	1.76262e-131
ERF_MA0760.1	ERF	MA0760.1	C_ETS1	41310	0.16034	14534	0.15945	14197	-0.00282	2.34184e-10
ETV1_MA0761.2	ETV1	MA0761.2	C_Erg	185755	0.09575	53402	0.09335	52220	0.00158	2.41568e-11
ETV2_MA0762.1	ETV2	MA0762.1	C_ETS1	51133	0.1259	15495	0.12348	15044	0.02165	1.69533e-73
ETV3_MA0763.1	ETV3	MA0763.1	C_ETS1	30425	0.19605	11541	0.19721	11436	-0.04735	1.11781e-95
ETV4_MA0764.3	ETV4	MA0764.3	C_ETS1	30955	0.24872	14148	0.25182	14244	-0.07736	1.33624e-115
ETV5_MA0765.3	ETV5	MA0765.3	C_ETS1	27298	0.24721	12255	0.25016	12337	-0.07303	1.01093e-108
GATA5_MA0766.2	GATA5	MA0766.2	C_Gata3	41811	0.06432	7540	0.06202	7304	0.01493	3.93533e-50
GCM2_MA0767.1	GCM2	MA0767.1	C_GCM2	41396	0.10133	12200	0.10271	12385	-0.06514	2.15906e-111
Lef1_MA0768.2	Lef1	MA0768.2	C_Lef1	109937	0.06842	21475	0.06661	20943	0.01153	7.17582e-59
TCF7_MA0769.2	TCF7	MA0769.2	C_Lef1	87573	0.06438	16006	0.06208	15350	0.04194	1.23312e-106
HSF2_MA0770.1	HSF2	MA0770.1	C_HSF4	67665	0.06825	12728	0.06478	12129	0.05492	6.85182e-120
HSF4_MA0771.1	HSF4	MA0771.1	C_HSF4	59665	0.07481	12727	0.07163	12240	0.03793	1.18557e-96
IRF7_MA0772.1	IRF7	MA0772.1	C_IRF7	88912	0.05871	12964	0.0561	12672	0.06415	4.6981e-126
MEF2D_MA0773.1	MEF2D	MA0773.1	C_MEF2A	77558	0.05563	10045	0.0513	9109	0.11959	4.89578e-154
MEIS2_MA0774.1	MEIS2	MA0774.1	C_MEIS2	107995	0.08355	26667	0.08302	26411	-0.02084	9.69268e-81
MEIS3_MA0775.1	MEIS3	MA0775.1	C_MEIS2	87611	0.08171	21100	0.08077	20674	-0.01004	9.15931e-53
MYBL1_MA0776.1	MYBL1	MA0776.1	C_MYBL1	10943	0.0832	2340	0.07945	2321	0.01027	2.97522e-18
MYBL2_MA0777.1	MYBL2	MA0777.1	C_MYBL2	10820	0.08913	2471	0.0865	2389	0.0051	3.7223e-05
NFKB2_MA0778.1	NFKB2	MA0778.1	C_NFKB2	37755	0.11004	12755	0.11117	13069	-0.08729	1.0673e-124
PAX1_MA0779.1	PAX1	MA0779.1	C_PAX9	30834	0.11145	9271	0.11189	9351	-0.04587	1.65832e-90
PAX3_MA0780.1	PAX3	MA0780.1	C_Pax7	20308	0.05219	2096	0.04827	1890	0.10978	1.15218e-117
PAX9_MA0781.1	PAX9	MA0781.1	C_PAX9	35149	0.10666	10343	0.1071	10333	-0.0451	5.43078e-89
PKNOX1_MA0782.2	PKNOX1	MA0782.2	C_PBX3	112042	0.08849	28183	0.08756	27855	-0.01755	5.34462e-82
PKNOX2_MA0783.1	PKNOX2	MA0783.1	C_TGIF2LX	83250	0.071	18450	0.07013	17930	-0.01368	4.38934e-64
POU1F1_MA0784.2	POU1F1	MA0784.2	C_POU1F1	78240	0.05785	10094	0.05446	9336	0.10376	3.03766e-143
POU2F1_MA0785.1	POU2F1	MA0785.1	C_POU1F1	80701	0.05963	10505	0.05598	9691	0.10071	1.34233e-142
POU3F1_MA0786.1	POU3F1	MA0786.1	C_POU1F1	91471	0.05528	10578	0.05172	9705	0.10717	4.10178e-149
POU3F2_MA0787.1	POU3F2	MA0787.1	C_POU1F1	85615	0.05714	10495	0.05367	9728	0.10269	2.8904e-154
POU3F3_MA0788.1	POU3F3	MA0788.1	C_POU1F1	86776	0.05556	9619	0.05129	8776	0.12094	7.29463e-157
POU3F4_MA0789.1	POU3F4	MA0789.1	C_POU1F1	76672	0.06085	10725	0.05755	9915	0.08961	1.01271e-138
POU4F1_MA0790.1	POU4F1	MA0790.1	C_POU4F2	75292	0.05067	7760	0.04692	7084	0.12008	4.66882e-158
POU4F3_MA0791.1	POU4F3	MA0791.1	C_POU4F2	70925	0.05216	7484	0.04823	6892	0.11785	1.09067e-149
POU5F1B_MA0792.1	POU5F1B	MA0792.1	C_POU1F1	77404	0.06081	10878	0.0578	10156	0.08982	1.55121e-130
POU6F2_MA0793.1	POU6F2	MA0793.1	C_POU6F2	55156	0.06386	9613	0.06053	9167	0.05527	1.38693e-110
PROX1_MA0794.1	PROX1	MA0794.1	C_PROX1	28434	0.08643	6546	0.08335	6289	0.01711	2.26331e-52
SMAD3_MA0795.1	SMAD3	MA0795.1	C_SMAD3	28576	0.08055	6826	0.07907	6808	-0.02027	8.3744e-57
TGIF1_MA0796.1	TGIF1	MA0796.1	C_TGIF2LX	73366	0.06985	15845	0.06872	15446	-0.00817	9.39823e-37
TGIF2_MA0797.1	TGIF2	MA0797.1	C_TGIF2LX	71498	0.07225	15993	0.07128	15603	-0.01108	1.8774e-51
RFX3_MA0798.3	RFX3	MA0798.3	C_RFX3	43601	0.09851	11643	0.0986	11543	-0.02139	3.02056e-64
RFX4_MA0799.2	RFX4	MA0799.2	C_RFX4	31636	0.11131	10074	0.11289	10155	-0.06024	2.32053e-102
EOMES_MA0800.1	EOMES	MA0800.1	C_TBX18	67986	0.064	12441	0.06157	11786	0.02686	3.82872e-87
MGA_MA0801.1	MGA	MA0801.1	C_TBX4	59332	0.07441	13420	0.07294	12877	-0.00545	1.14776e-21
TBR1_MA0802.1	TBR1	MA0802.1	C_TBX18	70428	0.06273	12687	0.06039	12014	0.0258	8.90102e-87
TBX15_MA0803.1	TBX15	MA0803.1	C_TBX4	86385	0.07319	18668	0.07168	17937	-0.00689	1.25737e-37
TBX19_MA0804.1	TBX19	MA0804.1	C_TBXT	34052	0.06399	6358	0.06187	5936	0.02878	2.46611e-76
TBX1_MA0805.1	TBX1	MA0805.1	C_TBX4	65925	0.06878	13712	0.067	13109	0.00569	5.34871e-25
TBX4_MA0806.1	TBX4	MA0806.1	C_TBX4	65925	0.06878	13712	0.067	13110	0.0057	4.71582e-25
TBX5_MA0807.1	TBX5	MA0807.1	C_TBX4	88088	0.06926	17954	0.06763	17079	-0.0072	4.26063e-36
TEAD3_MA0808.1	TEAD3	MA0808.1	C_TEAD4	61385	0.07415	13424	0.07264	12994	0.01093	1.13693e-45
TEAD4_MA0809.2	TEAD4	MA0809.2	C_TEAD4	96624	0.07113	20854	0.06934	20043	0.02347	3.01979e-89
TFAP2A_MA0810.1	TFAP2A	MA0810.1	C_TFAP2A	99966	0.16656	44982	0.17383	47074	-0.17621	5.19535e-173
TFAP2B_MA0811.1	TFAP2B	MA0811.1	C_TFAP2A	83727	0.14742	34452	0.15271	35770	-0.1462	4.52852e-161
TFAP2B_MA0812.1	TFAP2B	MA0812.1	C_TFAP2C	78534	0.15377	32997	0.15981	34416	-0.15904	1.05549e-168
TFAP2B_MA0813.1	TFAP2B	MA0813.1	C_TFAP2A	73718	0.16077	31762	0.16658	33104	-0.15156	3.24508e-159
TFAP2C_MA0814.2	TFAP2C	MA0814.2	C_TFAP2C	145845	0.16012	63296	0.16659	65509	-0.16007	1.87171e-177
TFAP2C_MA0815.1	TFAP2C	MA0815.1	C_TFAP2A	65909	0.16973	29551	0.17618	30897	-0.16542	1.54517e-161
Ascl2_MA0816.1	Ascl2	MA0816.1	C_Tcf12	140925	0.09361	42350	0.09707	44149	-0.11374	6.45775e-163
BHLHE23_MA0817.1	BHLHE23	MA0817.1	C_ATOH7	34336	0.05381	4681	0.05044	4018	0.08061	3.461e-119
BHLHE22_MA0818.2	BHLHE22	MA0818.2	C_ATOH7	27475	0.05585	3968	0.05277	3473	0.06453	8.63763e-107
CLOCK_MA0819.2	CLOCK	MA0819.2	C_MYC	43019	0.08726	11056	0.08638	10763	-0.02951	2.16764e-80
FIGLA_MA0820.1	FIGLA	MA0820.1	C_Rbpjl	104134	0.0732	23857	0.07266	23724	-0.04576	1.11379e-114
HES5_MA0821.2	HES5	MA0821.2	C_MYC	27611	0.14801	10450	0.15285	10732	-0.12177	9.57133e-135
HES7_MA0822.1	HES7	MA0822.1	C_HES7	31562	0.11725	10354	0.11979	10606	-0.08943	1.26816e-120
HEY1_MA0823.1	HEY1	MA0823.1	C_MYC	31945	0.14222	11564	0.14519	11692	-0.09331	8.15778e-126
MNT_MA0825.1	MNT	MA0825.1	C_MYC	33056	0.12089	10617	0.12172	10523	-0.05515	1.67161e-98
OLIG1_MA0826.1	OLIG1	MA0826.1	C_ATOH7	31756	0.05523	4621	0.05235	4043	0.06514	1.20624e-110
OLIG3_MA0827.1	OLIG3	MA0827.1	C_ATOH7	39158	0.05569	5679	0.05246	4999	0.08218	4.92872e-122
SREBF2_MA0828.2	SREBF2	MA0828.2	C_SREBF2	17845	0.12118	5011	0.11964	4852	-0.00193	0.372368
SREBF1_MA0829.2	SREBF1	MA0829.2	C_SREBF2	42239	0.089	10124	0.08721	9653	-0.00317	1.87896e-05
TCF4_MA0830.2	TCF4	MA0830.2	C_ASCL1	145256	0.10382	44679	0.10722	46222	-0.11387	2.08096e-168
TFE3_MA0831.3	TFE3	MA0831.3	C_BHLHE41	28649	0.13001	9171	0.12968	9090	-0.0289	2.26611e-74
Tcf21_MA0832.1	Tcf21	MA0832.1	C_Tcf21	72413	0.08395	18962	0.08467	19301	-0.05916	2.85193e-119
ATF4_MA0833.2	ATF4	MA0833.2	C_CEBPG	52724	0.06567	9114	0.06212	8425	0.07454	5.62592e-128
ATF7_MA0834.1	ATF7	MA0834.1	C_FOSL1::JUN	21735	0.13743	6473	0.13534	6245	0.01498	4.21124e-37
BATF3_MA0835.2	BATF3	MA0835.2	C_FOSL1::JUN	89725	0.06849	18616	0.06544	17259	0.05768	1.03471e-120
CEBPD_MA0836.2	CEBPD	MA0836.2	C_CEBPB	48975	0.06855	9577	0.06539	8997	0.06463	2.40637e-122
CEBPE_MA0837.2	CEBPE	MA0837.2	C_CEBPB	7697	0.09983	1956	0.09482	1871	0.06444	2.88303e-76
CEBPG_MA0838.1	CEBPG	MA0838.1	C_CEBPB	14604	0.08927	3441	0.08532	3216	0.0771	1.78015e-101
CREB3L1_MA0839.1	CREB3L1	MA0839.1	C_CREB3L4	36391	0.11582	10964	0.11599	10905	-0.0447	4.37189e-100
Creb5_MA0840.1	Creb5	MA0840.1	C_FOSL1::JUN	29704	0.11951	7951	0.11639	7579	0.03246	2.22483e-73
NFE2_MA0841.1	NFE2	MA0841.1	C_NFE2	55321	0.06717	11049	0.06421	10224	0.04806	6.39895e-108
NRL_MA0842.2	NRL	MA0842.2	C_MAFF	62171	0.07281	13644	0.07065	13264	0.02229	1.73424e-77
TEF_MA0843.1	TEF	MA0843.1	C_NFIL3	23743	0.06823	4003	0.06248	3439	0.14277	8.08214e-132
XBP1_MA0844.1	XBP1	MA0844.1	C_XBP1	22887	0.12382	7076	0.12507	6828	-0.03253	3.40211e-72
FOXB1_MA0845.1	FOXB1	MA0845.1	C_FOXC2	100909	0.04953	10626	0.04614	9685	0.09743	2.17249e-152
FOXC2_MA0846.1	FOXC2	MA0846.1	C_FOXC2	139737	0.05127	15637	0.04835	14891	0.0682	7.42629e-144
FOXD2_MA0847.3	FOXD2	MA0847.3	C_FOXE1	126936	0.05434	16687	0.05147	15754	0.05769	4.4665e-132
FOXO4_MA0848.1	FOXO4	MA0848.1	C_FOXN3	48756	0.07165	9731	0.069	9347	0.02756	7.10622e-81
FOXO6_MA0849.1	FOXO6	MA0849.1	C_FOXN3	48756	0.07165	9731	0.069	9347	0.02756	7.10622e-81
FOXP3_MA0850.1	FOXP3	MA0850.1	C_FOXN3	48756	0.07165	9731	0.069	9347	0.02756	7.10622e-81
Foxj3_MA0851.1	Foxj3	MA0851.1	C_FOXN3	108256	0.05605	14528	0.05343	13786	0.05181	6.92933e-123
FOXK1_MA0852.2	FOXK1	MA0852.2	C_FOXN3	73463	0.0719	14711	0.06944	14194	0.02834	2.00319e-93
Alx4_MA0853.1	Alx4	MA0853.1	C_Alx1	29058	0.06342	4734	0.06001	4549	0.06329	3.05468e-101
Alx1_MA0854.1	Alx1	MA0854.1	C_Alx1	30791	0.06376	4868	0.05949	4602	0.07124	6.94633e-111
RXRB_MA0855.1	RXRB	MA0855.1	C_NR2C2	83038	0.07538	18901	0.07362	18516	-0.00986	1.2506e-54
RXRG_MA0856.1	RXRG	MA0856.1	C_NR2C2	80290	0.07453	17905	0.07253	17548	-0.0061	3.05837e-28
Rarb_MA0857.1	Rarb	MA0857.1	C_Nr2F6	83671	0.06688	16127	0.06466	15684	0.00232	9.27227e-10
Rarb_MA0858.1	Rarb	MA0858.1	C_RARA	72299	0.07827	17504	0.07665	17210	-0.01112	6.2161e-57
Rarg_MA0859.1	Rarg	MA0859.1	C_Nr2F6	76262	0.06855	15047	0.06645	14648	-0.00036	0.593277
Rarg_MA0860.1	Rarg	MA0860.1	C_Rarg	83063	0.08156	21545	0.08009	21222	-0.02251	9.32839e-81
TP73_MA0861.1	TP73	MA0861.1	C_TP73	45496	0.08106	10023	0.07966	9626	-0.00855	5.43041e-37
GMEB2_MA0862.1	GMEB2	MA0862.1	C_GMEB2	5727	0.11509	1382	0.11184	1286	0.03155	2.43474e-51
MTF1_MA0863.1	MTF1	MA0863.1	C_MTF1	53992	0.10399	17244	0.10527	17037	-0.06144	8.95802e-121
E2F2_MA0864.2	E2F2	MA0864.2	C_ZNF417	8876	0.19369	4301	0.19598	4395	-0.1177	1.74939e-103
E2F8_MA0865.2	E2F8	MA0865.2	C_E2F8	22589	0.19649	10310	0.20119	10656	-0.14317	1.43864e-131
SOX21_MA0866.1	SOX21	MA0866.1	C_SOX21	66946	0.06243	11104	0.05953	10534	0.05823	1.45588e-115
SOX4_MA0867.2	SOX4	MA0867.2	C_SOX4	120443	0.08498	28753	0.08413	28786	-0.00496	3.86971e-30
SOX8_MA0868.2	SOX8	MA0868.2	C_Sox17	66918	0.08017	14766	0.07758	14290	0.02975	4.46869e-88
Sox11_MA0869.2	Sox11	MA0869.2	C_SOX4	162961	0.08109	38022	0.0799	37887	-0.00015	0.626695
Sox1_MA0870.1	Sox1	MA0870.1	C_SOX21	54693	0.06491	9257	0.06166	8876	0.05578	2.50292e-113
TFEC_MA0871.2	TFEC	MA0871.2	C_MYC	46085	0.12586	14850	0.12576	14689	-0.04187	5.47344e-95
TFAP2A_MA0872.1	TFAP2A	MA0872.1	C_TFAP2A	69699	0.17112	31727	0.17785	33226	-0.16992	6.90483e-163
HOXD12_MA0873.1	HOXD12	MA0873.1	C_HOXC10	18969	0.06007	2791	0.05729	2612	0.07764	1.58112e-105
Arx_MA0874.1	Arx	MA0874.1	C_Alx1	27634	0.06724	4301	0.06236	4141	0.07428	1.16674e-108
BARX1_MA0875.1	BARX1	MA0875.1	C_TLX2	38168	0.07355	7339	0.06972	6987	0.0491	1.35258e-96
BSX_MA0876.1	BSX	MA0876.1	C_DLX6	37252	0.07592	7340	0.07295	6986	0.03177	3.69115e-74
BARHL1_MA0877.3	BARHL1	MA0877.3	C_BARHL1	10224	0.07167	2099	0.07003	2073	0.01663	1.39768e-33
CDX1_MA0878.3	CDX1	MA0878.3	C_HOXA10	55576	0.05775	7644	0.05446	7078	0.07843	9.19047e-129
DLX1_MA0879.2	DLX1	MA0879.2	C_Dlx2	44156	0.07159	7803	0.06725	7412	0.05979	3.86786e-112
Dlx3_MA0880.1	Dlx3	MA0880.1	C_DLX6	29877	0.06693	4987	0.06317	4698	0.06207	6.9949e-103
Dlx4_MA0881.1	Dlx4	MA0881.1	C_DLX6	29877	0.06693	4987	0.06317	4698	0.06207	6.9949e-103
DLX6_MA0882.1	DLX6	MA0882.1	C_DLX6	30346	0.06944	5364	0.06547	5118	0.04832	6.55991e-96
Dmbx1_MA0883.1	Dmbx1	MA0883.1	C_Dmbx1	29853	0.06757	5384	0.065	5198	0.04333	1.72391e-93
DUXA_MA0884.2	DUXA	MA0884.2	C_DUXA	25493	0.05807	3417	0.05384	3128	0.08549	4.72568e-115
Dlx2_MA0885.2	Dlx2	MA0885.2	C_Dlx2	47770	0.0681	8152	0.06362	7769	0.06038	7.96083e-114
EMX2_MA0886.1	EMX2	MA0886.1	C_EMX2	25143	0.07326	4632	0.06867	4601	0.04029	9.05415e-81
EVX1_MA0887.1	EVX1	MA0887.1	C_EVX2	26971	0.07601	5484	0.07261	5483	0.01801	7.43829e-50
EVX2_MA0888.1	EVX2	MA0888.1	C_EVX2	27055	0.07598	5589	0.07238	5612	0.01994	5.48184e-58
GBX1_MA0889.1	GBX1	MA0889.1	C_GBX2	27717	0.08281	5729	0.07777	5526	0.04891	1.68361e-95
GBX2_MA0890.1	GBX2	MA0890.1	C_GBX2	34795	0.07943	6873	0.0744	6606	0.05207	1.88619e-98
GSC2_MA0891.1	GSC2	MA0891.1	C_OTX2	44642	0.06558	7802	0.06375	7731	-0.01444	5.01723e-57
GSX1_MA0892.1	GSX1	MA0892.1	C_PAX4	41513	0.06911	7443	0.0653	7143	0.04798	3.93094e-106
GSX2_MA0893.2	GSX2	MA0893.2	C_ESX1	39167	0.07455	8092	0.07086	7862	0.02979	4.76552e-77
HESX1_MA0894.1	HESX1	MA0894.1	C_GBX2	32229	0.07321	6063	0.06941	5808	0.0568	1.23795e-102
HMBOX1_MA0895.1	HMBOX1	MA0895.1	C_HMBOX1	30684	0.06823	5457	0.06514	5211	0.0452	9.46668e-93
Hmx1_MA0896.1	Hmx1	MA0896.1	C_Hmx3	42099	0.06323	6982	0.06005	6742	0.05196	7.07198e-98
Hmx2_MA0897.1	Hmx2	MA0897.1	C_Hmx3	50568	0.05776	7026	0.05427	6600	0.07005	8.47456e-125
Hmx3_MA0898.1	Hmx3	MA0898.1	C_Hmx3	50845	0.05632	6868	0.05281	6417	0.07535	9.40635e-127
HOXA10_MA0899.1	HOXA10	MA0899.1	C_HOXA10	69890	0.05254	8258	0.0494	7671	0.08915	8.01936e-139
HOXA2_MA0900.2	HOXA2	MA0900.2	C_ESX1	16857	0.07551	3170	0.06991	3104	0.03984	4.37383e-73
HOXB13_MA0901.2	HOXB13	MA0901.2	C_HOXB13	105184	0.05036	9858	0.04675	9236	0.09895	5.49862e-146
HOXB2_MA0902.2	HOXB2	MA0902.2	C_ESX1	23668	0.07489	4606	0.06997	4472	0.03553	1.76096e-77
HOXB3_MA0903.1	HOXB3	MA0903.1	C_EMX2	42195	0.07508	8329	0.07139	8164	0.03861	2.25732e-101
HOXB5_MA0904.2	HOXB5	MA0904.2	C_ESX1	16857	0.07551	3170	0.06991	3104	0.03985	4.26761e-73
HOXC10_MA0905.1	HOXC10	MA0905.1	C_HOXC10	33468	0.05519	4323	0.05197	3998	0.09072	7.77799e-127
HOXC12_MA0906.1	HOXC12	MA0906.1	C_HOXC10	23837	0.05843	3450	0.05557	3202	0.07841	1.08137e-114
HOXC13_MA0907.1	HOXC13	MA0907.1	C_HOXC13	37768	0.06143	6014	0.05874	5628	0.06784	4.58739e-116
HOXD11_MA0908.1	HOXD11	MA0908.1	C_HOXC10	23667	0.05709	3164	0.05389	2931	0.08856	1.01665e-115
Hoxd13_MA0909.3	Hoxd13	MA0909.3	C_CDX2	67742	0.05832	8576	0.05473	7956	0.0828	2.194e-133
HOXD8_MA0910.2	HOXD8	MA0910.2	C_HOXB8	40531	0.06555	7142	0.06221	6851	0.04344	2.52538e-97
Hoxa11_MA0911.1	Hoxa11	MA0911.1	C_HOXC10	21330	0.05984	3169	0.05689	2979	0.07718	9.71374e-103
HOXD3_MA0912.2	HOXD3	MA0912.2	C_ESX1	40565	0.06715	7127	0.06356	6911	0.04331	2.91314e-99
HOXD9_MA0913.2	HOXD9	MA0913.2	C_HOXA10	58953	0.05343	7481	0.05047	6950	0.08426	2.13726e-127
ISL2_MA0914.1	ISL2	MA0914.1	C_ISL2	47914	0.06762	9166	0.0649	8879	0.02287	9.49747e-77
HES1_MA1099.2	HES1	MA1099.2	C_MYC	35770	0.23872	18370	0.2496	19023	-0.18738	6.01443e-155
ASCL1_MA1100.2	ASCL1	MA1100.2	C_Tcf12	109165	0.09817	34665	0.10323	36523	-0.14221	3.35092e-168
BACH2_MA1101.2	BACH2	MA1101.2	C_NFE2	52782	0.06813	10903	0.06522	10180	0.05018	4.39433e-109
CTCFL_MA1102.2	CTCFL	MA1102.2	C_CTCFL	143165	0.19146	70518	0.19934	73846	-0.18643	1.5693e-189
FOXK2_MA1103.2	FOXK2	MA1103.2	C_FOXN3	73265	0.06591	13037	0.06322	12440	0.04012	4.72888e-104
GATA6_MA1104.2	GATA6	MA1104.2	C_Gata3	59714	0.05459	8254	0.05204	7758	0.06022	1.81991e-116
GRHL2_MA1105.2	GRHL2	MA1105.2	C_GRHL2	76105	0.06727	14969	0.06505	14553	0.02321	5.17669e-77
HIF1A_MA1106.1	HIF1A	MA1106.1	C_ARNT::HIF1A	24332	0.1245	8178	0.12596	8258	-0.07479	3.28894e-104
KLF9_MA1107.2	KLF9	MA1107.2	C_KLF9	284622	0.13159	93982	0.13559	96998	-0.11647	2.06842e-181
MXI1_MA1108.2	MXI1	MA1108.2	C_MXI1	125352	0.06853	25999	0.06689	24774	-0.00846	6.46205e-51
NEUROD1_MA1109.1	NEUROD1	MA1109.1	C_Neurod2	157141	0.08489	42539	0.08626	43363	-0.06627	5.43804e-145
Nr1H4_MA1110.2	Nr1H4	MA1110.2	C_Nr1H2	105718	0.0823	28385	0.08081	27717	-0.03011	2.57564e-98
NR2F2_MA1111.1	NR2F2	MA1111.1	C_Nr1H2	82963	0.07166	18669	0.06923	17951	0.00395	2.15601e-17
NR4A1_MA1112.2	NR4A1	MA1112.2	C_NR4A1	104692	0.06943	20631	0.06664	19982	0.03167	1.05197e-104
PBX2_MA1113.2	PBX2	MA1113.2	C_MEIS2	59641	0.05534	7258	0.05147	6542	0.09457	2.56706e-135
PBX3_MA1114.1	PBX3	MA1114.1	C_PBX3	135325	0.09639	37650	0.09632	37616	-0.04269	7.43947e-119
POU5F1_MA1115.1	POU5F1	MA1115.1	C_POU2F3	98310	0.06022	14416	0.05759	13600	0.0697	2.4388e-129
RBPJ_MA1116.1	RBPJ	MA1116.1	C_RBPJ	172193	0.08525	43901	0.08487	43536	-0.02661	7.39015e-104
RELB_MA1117.1	RELB	MA1117.1	C_RELB	67850	0.09353	18673	0.09357	18956	-0.04326	3.49357e-108
SIX1_MA1118.1	SIX1	MA1118.1	C_SIX1	62195	0.06765	11671	0.06461	11142	0.04089	2.07493e-94
SIX2_MA1119.1	SIX2	MA1119.1	C_SIX2	80740	0.06799	16155	0.06591	15334	0.02383	2.57502e-80
SOX13_MA1120.1	SOX13	MA1120.1	C_SOX13	72879	0.08443	17476	0.08273	17053	0.0089	2.76054e-46
TEAD2_MA1121.1	TEAD2	MA1121.1	C_TEAD4	83114	0.0761	19158	0.07452	18589	0.00594	4.55988e-34
TFDP1_MA1122.1	TFDP1	MA1122.1	C_E2F6	63921	0.25348	36016	0.26469	37810	-0.23306	3.64918e-179
TWIST1_MA1123.2	TWIST1	MA1123.2	C_TWIST1	127669	0.07412	30306	0.0742	30429	-0.03968	3.45147e-117
ZNF24_MA1124.1	ZNF24	MA1124.1	C_ZNF24	82360	0.06357	14202	0.06126	13431	0.04516	7.71028e-121
ZNF384_MA1125.1	ZNF384	MA1125.1	C_ZNF384	219828	0.04775	20771	0.04549	20586	0.05565	2.21365e-138
FOSJUN_MA1126.1	FOS::JUN	MA1126.1	C_FOSL1::JUN	36136	0.10923	9577	0.10721	9298	0.01086	9.58408e-39
FOSBJUN_MA1127.1	FOSB::JUN	MA1127.1	C_FOSL1::JUN	30570	0.12428	8651	0.12217	8345	0.01513	6.15656e-49
FOSL1JUN_MA1128.1	FOSL1::JUN	MA1128.1	C_FOSL1::JUN	77799	0.07314	17087	0.07044	15961	0.04707	4.69328e-110
FOSL1JUN_MA1129.1	FOSL1::JUN	MA1129.1	C_FOSL1::JUN	20385	0.1333	5875	0.13078	5647	0.02296	8.24612e-52
FOSL2JUN_MA1130.1	FOSL2::JUN	MA1130.1	C_FOSL1::JUN	70253	0.07277	15417	0.06994	14403	0.0478	1.39668e-115
FOSL2JUN_MA1131.1	FOSL2::JUN	MA1131.1	C_FOSL1::JUN	36698	0.11745	10075	0.11523	9743	0.01212	2.35153e-41
JUNJUNB_MA1132.1	JUN::JUNB	MA1132.1	C_FOSL1::JUN	60867	0.07594	13144	0.07321	12260	0.04965	1.63524e-111
JUNJUNB_MA1133.1	JUN::JUNB	MA1133.1	C_FOSL1::JUN	33837	0.12237	9858	0.12104	9615	0.00212	0.000171227
FOSJUNB_MA1134.1	FOS::JUNB	MA1134.1	C_FOSL1::JUN	65549	0.07038	14130	0.06756	13127	0.05023	6.64522e-104
FOSBJUNB_MA1135.1	FOSB::JUNB	MA1135.1	C_FOSL1::JUN	68463	0.0699	14677	0.06711	13641	0.05097	3.24802e-117
FOSBJUNB_MA1136.1	FOSB::JUNB	MA1136.1	C_FOSL1::JUN	22689	0.13057	6416	0.12828	6162	0.02417	1.58081e-58
FOSL1JUNB_MA1137.1	FOSL1::JUNB	MA1137.1	C_FOSL1::JUN	70272	0.07111	15261	0.06836	14173	0.04699	4.52201e-105
FOSL2JUNB_MA1138.1	FOSL2::JUNB	MA1138.1	C_FOSL1::JUN	66573	0.06821	13786	0.06534	12714	0.05644	2.57031e-121
FOSL2JUNB_MA1139.1	FOSL2::JUNB	MA1139.1	C_FOSL1::JUN	23260	0.12855	6733	0.12685	6483	0.0176	1.70531e-40
JUNB_MA1140.2	JUNB	MA1140.2	C_FOSL1::JUN	23022	0.14497	7212	0.14279	6996	-0.00611	8.59718e-14
FOSJUND_MA1141.1	FOS::JUND	MA1141.1	C_FOSL1::JUN	77052	0.07386	17142	0.07125	16051	0.04421	2.81811e-109
FOSL1JUND_MA1142.1	FOSL1::JUND	MA1142.1	C_FOSL1::JUN	70965	0.07077	14917	0.06788	13769	0.05495	1.88507e-118
FOSL1JUND_MA1143.1	FOSL1::JUND	MA1143.1	C_FOSL1::JUND	26499	0.12804	7060	0.12591	6718	0.0321	1.54995e-74
FOSL2JUND_MA1144.1	FOSL2::JUND	MA1144.1	C_FOSL1::JUN	66554	0.07054	14276	0.06778	13265	0.05053	2.19432e-113
FOSL2JUND_MA1145.1	FOSL2::JUND	MA1145.1	C_FOSL1::JUN	33139	0.12636	9580	0.12467	9258	0.00479	1.17418e-14
NR1H4RXRA_MA1146.1	NR1H4::RXRA	MA1146.1	C_NR2F1	41851	0.09235	11682	0.09126	11620	-0.02993	6.68499e-82
NR4A2RXRA_MA1147.1	NR4A2::RXRA	MA1147.1	C_NR2F1	39773	0.0994	11976	0.09896	12022	-0.05267	2.42367e-106
PPARARXRA_MA1148.1	PPARA::RXRA	MA1148.1	C_PPARA::RXRA	87981	0.07833	20775	0.07694	20509	-0.01745	7.58447e-76
RARARXRG_MA1149.1	RARA::RXRG	MA1149.1	C_RARA::RXRG	85824	0.10681	27353	0.1083	27818	-0.08598	8.18241e-144
RORB_MA1150.1	RORB	MA1150.1	C_RORB	58594	0.07324	13415	0.07024	12672	0.03426	4.87728e-90
RORC_MA1151.1	RORC	MA1151.1	C_RORB	56594	0.07342	12779	0.06966	11944	0.04313	4.71048e-103
SOX15_MA1152.1	SOX15	MA1152.1	C_SOX15	128247	0.06731	22387	0.06488	21872	0.03228	1.00189e-108
Smad4_MA1153.1	Smad4	MA1153.1	C_Smad4	59911	0.08108	15070	0.0803	15005	-0.02867	4.22872e-85
ZNF282_MA1154.1	ZNF282	MA1154.1	C_ZNF282	77327	0.08163	18894	0.08086	18863	-0.02281	7.605e-84
ZSCAN4_MA1155.1	ZSCAN4	MA1155.1	C_ZSCAN4	160202	0.06717	32332	0.06619	31543	-0.0258	2.1767e-109
IRF3_MA1418.1	IRF3	MA1418.1	C_IRF3	107879	0.06914	20471	0.06705	20199	0.02398	1.75233e-91
IRF4_MA1419.1	IRF4	MA1419.1	C_Irf1	44223	0.07346	8836	0.07138	8691	0.02563	3.18884e-76
IRF5_MA1420.1	IRF5	MA1420.1	C_IRF5	40455	0.08169	8962	0.07981	8815	0.01617	6.26843e-55
TCF7L1_MA1421.1	TCF7L1	MA1421.1	C_TCF7L1	102856	0.06541	19147	0.06292	18331	0.03698	4.52762e-110
ARGFX_MA1463.1	ARGFX	MA1463.1	C_ARGFX	40670	0.05692	5375	0.05315	5171	0.0806	8.19134e-124
ARNT2_MA1464.1	ARNT2	MA1464.1	C_MYC	28469	0.13845	9741	0.13973	9739	-0.06037	1.10646e-104
ATF6_MA1466.1	ATF6	MA1466.1	C_CREB3L4	34454	0.11674	10454	0.11798	10361	-0.0496	4.17112e-99
Atoh1_MA1467.2	Atoh1	MA1467.2	C_Neurod2	132849	0.07519	31642	0.07532	31560	-0.03528	4.93846e-104
ATOH7_MA1468.1	ATOH7	MA1468.1	C_ATOH7	68916	0.06197	12275	0.06038	11750	0.00415	6.19634e-18
BACH2_MA1470.1	BACH2	MA1470.1	C_BACH2	26897	0.08619	5463	0.08156	5075	0.05616	3.39361e-97
BARX2_MA1471.1	BARX2	MA1471.1	C_BARX2	52559	0.05482	5631	0.04987	5124	0.10902	8.57509e-137
Bhlha15_MA1472.2	Bhlha15	MA1472.2	C_Tcf12	107718	0.10024	34910	0.10467	36538	-0.13173	1.22782e-166
CDX4_MA1473.1	CDX4	MA1473.1	C_HOXA10	58677	0.05468	7424	0.0515	6892	0.08481	4.07142e-136
CREB3L4_MA1474.1	CREB3L4	MA1474.1	C_CREB3L4	32740	0.16349	12149	0.16692	12254	-0.09113	4.83181e-121
CREB3L4_MA1475.1	CREB3L4	MA1475.1	C_FOSL1::JUN	17585	0.19785	6760	0.19986	6692	-0.05484	1.8834e-87
Dlx5_MA1476.2	Dlx5	MA1476.2	C_Dlx2	46897	0.06662	7880	0.06216	7515	0.0604	1.82432e-111
DMRTA2_MA1478.1	DMRTA2	MA1478.1	C_DMRTA1	48039	0.05743	6932	0.05404	6399	0.0798	1.11343e-127
DMRTC2_MA1479.1	DMRTC2	MA1479.1	C_DMRTA1	54735	0.05624	7480	0.05232	6754	0.08741	2.2095e-131
DPRX_MA1480.1	DPRX	MA1480.1	C_DPRX	31917	0.07132	6634	0.07012	6438	0.01691	1.23526e-52
DRGX_MA1481.1	DRGX	MA1481.1	C_ESX1	25080	0.08419	5044	0.079	4871	0.04393	3.58302e-85
ELF2_MA1483.2	ELF2	MA1483.2	C_Erg	54434	0.15027	18536	0.14914	18258	-0.01363	9.60153e-56
ETS2_MA1484.1	ETS2	MA1484.1	C_ETS1	46869	0.17718	18107	0.17742	17983	-0.03936	4.84351e-97
FERD3L_MA1485.1	FERD3L	MA1485.1	C_FERD3L	81447	0.10303	26189	0.10576	26691	-0.0977	2.9979e-142
FOXE1_MA1487.2	FOXE1	MA1487.2	C_FOXE1	141090	0.05457	18781	0.05181	17898	0.05731	1.18825e-134
FOXN3_MA1489.1	FOXN3	MA1489.1	C_FOXN3	12965	0.07299	2414	0.07009	2315	0.03685	4.14422e-65
GLI3_MA1491.2	GLI3	MA1491.2	C_GLI3	77898	0.10467	23929	0.10607	24289	-0.07543	1.59724e-131
HES6_MA1493.1	HES6	MA1493.1	C_HES6	39775	0.10088	11354	0.10062	11160	-0.03987	8.00704e-92
HNF4A_MA1494.1	HNF4A	MA1494.1	C_HNF4A	64811	0.07908	15182	0.0771	14829	-0.00212	1.82798e-07
HOXA1_MA1495.1	HOXA1	MA1495.1	C_ESX1	16857	0.07551	3170	0.06991	3104	0.03985	4.26761e-73
HOXA4_MA1496.1	HOXA4	MA1496.1	C_HOXD4	39596	0.06421	6944	0.06166	6690	0.04156	2.5111e-91
HOXA6_MA1497.1	HOXA6	MA1497.1	C_HOXB7	32532	0.07073	6005	0.06693	5894	0.02988	6.49942e-71
HOXA7_MA1498.2	HOXA7	MA1498.2	C_HOXB8	38051	0.0652	6676	0.06204	6378	0.04626	5.5057e-101
HOXB4_MA1499.1	HOXB4	MA1499.1	C_HOXD4	39871	0.05771	5755	0.05497	5542	0.06344	9.2866e-111
HOXB6_MA1500.1	HOXB6	MA1500.1	C_HOXB6	38165	0.06035	6132	0.05746	5805	0.05605	2.94725e-102
HOXB7_MA1501.1	HOXB7	MA1501.1	C_HOXB7	33530	0.06925	6333	0.06601	6177	0.03345	1.0974e-80
HOXB8_MA1502.1	HOXB8	MA1502.1	C_HOXB8	40531	0.06555	7142	0.06222	6851	0.04339	2.81854e-97
HOXB9_MA1503.1	HOXB9	MA1503.1	C_HOXC10	25309	0.0567	3419	0.05353	3141	0.09014	8.56084e-115
HOXC4_MA1504.1	HOXC4	MA1504.1	C_HOXD4	38332	0.06572	6999	0.06309	6766	0.04246	5.12069e-94
HOXC8_MA1505.1	HOXC8	MA1505.1	C_LHX5	23488	0.06083	3631	0.0573	3513	0.0548	2.76912e-99
HOXD10_MA1506.1	HOXD10	MA1506.1	C_HOXC10	24924	0.05987	3641	0.0569	3362	0.08548	2.43721e-114
HOXD4_MA1507.1	HOXD4	MA1507.1	C_HOXD4	34694	0.06305	5778	0.05997	5583	0.04902	2.32864e-96
IKZF1_MA1508.1	IKZF1	MA1508.1	C_IKZF1	211021	0.07876	51439	0.07587	50003	0.01947	7.46837e-98
IRF6_MA1509.1	IRF6	MA1509.1	C_IRF6	13396	0.09423	3601	0.09293	3602	-0.00108	0.534504
KLF10_MA1511.2	KLF10	MA1511.2	C_KLF4	231095	0.20353	100881	0.21157	105554	-0.178	3.43985e-191
KLF11_MA1512.1	KLF11	MA1512.1	C_KLF9	179340	0.19264	71447	0.19891	73555	-0.13658	6.1581e-177
KLF15_MA1513.1	KLF15	MA1513.1	C_PATZ1	164551	0.28956	95295	0.30503	100937	-0.27684	8.40198e-209
KLF17_MA1514.1	KLF17	MA1514.1	C_KLF17	183720	0.11939	61480	0.1229	63893	-0.12032	2.1635e-170
KLF2_MA1515.1	KLF2	MA1515.1	C_KLF9	173192	0.20316	73235	0.21061	76006	-0.16316	7.4521e-186
KLF3_MA1516.1	KLF3	MA1516.1	C_KLF3	97950	0.23076	45773	0.2394	47352	-0.17115	3.35471e-174
KLF6_MA1517.1	KLF6	MA1517.1	C_KLF9	135845	0.19355	54697	0.19968	56423	-0.13975	2.12867e-169
Lhx1_MA1518.2	Lhx1	MA1518.2	C_Lhx1	24830	0.07478	4952	0.07191	4982	0.01902	4.20367e-55
LHX5_MA1519.1	LHX5	MA1519.1	C_LHX5	39682	0.05956	6107	0.05618	5903	0.06042	7.62596e-115
MAF_MA1520.1	MAF	MA1520.1	C_MAFA	56189	0.08674	15527	0.08598	15305	-0.03226	3.09243e-93
MAFA_MA1521.1	MAFA	MA1521.1	C_MAFA	58214	0.09906	17870	0.09943	17878	-0.0593	1.67635e-111
MAZ_MA1522.1	MAZ	MA1522.1	C_PATZ1	231706	0.18112	99120	0.18892	104035	-0.17891	2.57027e-196
MSANTD3_MA1523.1	MSANTD3	MA1523.1	C_MSANTD3	87917	0.08677	23444	0.08567	23013	-0.02872	1.37213e-92
Msgn1_MA1524.2	Msgn1	MA1524.2	C_Msgn1	107178	0.07201	22587	0.0709	22235	-0.00078	0.0255667
NFATC4_MA1525.2	NFATC4	MA1525.2	C_Nfatc2	78089	0.06637	13851	0.06322	13135	0.06936	1.52901e-125
NFIC_MA1527.1	NFIC	MA1527.1	C_NFIB	84759	0.11229	30747	0.11484	31674	-0.10466	1.92327e-147
NFIX_MA1528.1	NFIX	MA1528.1	C_NFIB	99730	0.12324	38986	0.1271	40553	-0.12371	1.93656e-160
NHLH2_MA1529.1	NHLH2	MA1529.1	C_NHLH2	98966	0.12189	36441	0.12741	38077	-0.14689	1.04476e-171
NKX6-3_MA1530.1	NKX6-3	MA1530.1	C_NKX6-3	51036	0.05996	7972	0.057	7579	0.06837	5.06599e-121
NR1D1_MA1531.1	NR1D1	MA1531.1	C_NR1D1	72368	0.09333	21186	0.09364	21264	-0.05617	9.86203e-115
NR1D2_MA1532.2	NR1D2	MA1532.2	C_NR1D1	71645	0.0815	17702	0.08049	17507	-0.03137	1.55485e-91
NR1I2_MA1533.1	NR1I2	MA1533.1	C_NR1I2	51419	0.1025	16293	0.10271	16358	-0.05608	4.1477e-107
NR1I3_MA1534.1	NR1I3	MA1534.1	C_Vdr	60894	0.06232	10742	0.05968	10173	0.04074	7.85655e-104
NR2C1_MA1535.1	NR2C1	MA1535.1	C_NR2C2	91279	0.08863	25912	0.08753	25580	-0.04183	2.18737e-119
NR2C2_MA1536.1	NR2C2	MA1536.1	C_NR2C2	62621	0.08561	17021	0.08438	16705	-0.02913	1.41088e-90
NR2F1_MA1537.1	NR2F1	MA1537.1	C_NR2C2	88748	0.08435	22588	0.08324	22516	-0.03182	4.32207e-95
NR2F1_MA1538.1	NR2F1	MA1538.1	C_NR2F1	43219	0.09631	12859	0.09576	12777	-0.04475	1.00487e-100
NR2F6_MA1539.1	NR2F6	MA1539.1	C_NR2F1	39067	0.09446	11703	0.09356	11693	-0.04603	1.57631e-98
NR5A1_MA1540.2	NR5A1	MA1540.2	C_NR5A1	155207	0.07261	35514	0.07132	34639	-0.03512	2.77438e-119
NR6A1_MA1541.1	NR6A1	MA1541.1	C_NR6A1	84490	0.07219	18720	0.07036	18085	-0.00708	3.47496e-34
OSR1_MA1542.1	OSR1	MA1542.1	C_OSR1	57566	0.08635	14853	0.08563	14552	-0.0264	9.92068e-84
OVOL1_MA1544.1	OVOL1	MA1544.1	C_OVOL1	8393	0.09792	2051	0.09411	1995	0.03093	7.93883e-54
OVOL2_MA1545.1	OVOL2	MA1545.1	C_OVOL1	7862	0.10459	2146	0.10278	2097	0.00723	1.79599e-13
PAX3_MA1546.1	PAX3	MA1546.1	C_PAX3	20771	0.09372	4930	0.09229	4850	0.00037	0.565685
PITX2_MA1547.2	PITX2	MA1547.2	C_OTX2	56079	0.06177	9189	0.05985	8971	-0.00098	0.389227
PLAGL2_MA1548.1	PLAGL2	MA1548.1	C_PLAGL2	57062	0.15746	25770	0.16478	26964	-0.17423	2.44293e-162
POU6F1_MA1549.1	POU6F1	MA1549.1	C_POU6F2	55547	0.06446	9749	0.06135	9208	0.05456	3.42778e-106
PPARD_MA1550.1	PPARD	MA1550.1	C_NR2C2	83013	0.07643	19000	0.0747	18761	-0.01063	3.18341e-53
RARB_MA1552.1	RARB	MA1552.1	C_RXRG	34720	0.10461	9591	0.10383	9448	-0.0256	4.30186e-70
RARG_MA1553.1	RARG	MA1553.1	C_RXRG	34030	0.09412	8687	0.09274	8469	-0.01369	1.11113e-50
RFX7_MA1554.1	RFX7	MA1554.1	C_RFX7	43092	0.09191	11181	0.09223	11092	-0.02387	2.63371e-72
RXRB_MA1555.1	RXRB	MA1555.1	C_RXRG	36967	0.10527	10557	0.10558	10632	-0.05422	8.28707e-103
RXRG_MA1556.1	RXRG	MA1556.1	C_RXRG	45709	0.11277	13746	0.11328	13784	-0.05449	5.65503e-104
SMAD5_MA1557.1	SMAD5	MA1557.1	C_SMAD3	22757	0.09038	5973	0.08852	5997	-0.03489	6.05386e-69
SNAI1_MA1558.1	SNAI1	MA1558.1	C_ASCL1	116244	0.07213	26411	0.07202	26436	-0.05228	2.16649e-126
SNAI3_MA1559.1	SNAI3	MA1559.1	C_ASCL1	116371	0.07164	26216	0.07145	26270	-0.05119	7.52356e-123
SOHLH2_MA1560.1	SOHLH2	MA1560.1	C_MYC	26374	0.15528	9401	0.15945	9518	-0.08958	9.30982e-119
SOX12_MA1561.1	SOX12	MA1561.1	C_SOX12	35271	0.08027	7650	0.07785	7623	0.01216	1.06806e-39
SOX14_MA1562.1	SOX14	MA1562.1	C_SOX14	38048	0.08221	8382	0.07984	8182	0.0263	8.92464e-75
SOX18_MA1563.2	SOX18	MA1563.2	C_SOX18	44777	0.07253	8860	0.06988	8577	0.04353	7.4473e-97
SP9_MA1564.1	SP9	MA1564.1	C_KLF9	188822	0.22068	82278	0.22899	85726	-0.17222	2.13241e-188
TBX18_MA1565.1	TBX18	MA1565.1	C_TBX18	107977	0.07909	25252	0.07815	24735	-0.01757	1.38266e-78
TBX3_MA1566.2	TBX3	MA1566.2	C_TBX18	67018	0.06869	13757	0.06696	13156	0.00455	2.80905e-18
Tbx6_MA1567.2	Tbx6	MA1567.2	C_TBX18	105976	0.0742	24064	0.07296	23489	-0.01122	4.20052e-58
TCF21_MA1568.1	TCF21	MA1568.1	C_ATOH7	47684	0.06844	9402	0.06693	9171	-0.00896	3.22608e-36
TFAP2E_MA1569.1	TFAP2E	MA1569.1	C_TFAP2C	69192	0.17298	32318	0.18093	33867	-0.19256	5.49738e-171
TFAP4_MA1570.1	TFAP4	MA1570.1	C_TFAP4	46394	0.0598	7227	0.05742	6799	0.01595	5.7753e-55
TGIF2LX_MA1571.1	TGIF2LX	MA1571.1	C_TGIF2LX	51114	0.07901	12457	0.07859	12281	-0.02689	2.28181e-74
TGIF2LY_MA1572.1	TGIF2LY	MA1572.1	C_TGIF2LX	47935	0.07701	11323	0.07644	11114	-0.01997	3.62606e-66
Thap11_MA1573.2	Thap11	MA1573.2	C_Thap11	89827	0.10385	21807	0.10241	21422	-0.02478	7.2394e-91
THRB_MA1574.1	THRB	MA1574.1	C_NR2C2	85787	0.08989	22875	0.08927	22943	-0.04257	4.52071e-108
THRB_MA1575.1	THRB	MA1575.1	C_THRB	42936	0.10975	14246	0.11005	14344	-0.06295	7.6606e-121
THRB_MA1576.1	THRB	MA1576.1	C_THRB	93506	0.0843	24243	0.08392	23856	-0.04113	1.01087e-104
TLX2_MA1577.1	TLX2	MA1577.1	C_TLX2	25127	0.08034	5065	0.07558	4859	0.04718	3.11077e-90
VEZF1_MA1578.1	VEZF1	MA1578.1	C_ZNF740	91745	0.11499	29616	0.11975	31748	-0.1601	8.23598e-171
ZBTB26_MA1579.1	ZBTB26	MA1579.1	C_ZBTB26	140403	0.07872	33730	0.07771	33411	-0.011	1.41873e-62
ZBTB32_MA1580.1	ZBTB32	MA1580.1	C_ZBTB32	62621	0.06296	11484	0.06048	10714	0.0406	1.12125e-97
ZBTB6_MA1581.1	ZBTB6	MA1581.1	C_ZBTB6	120712	0.11216	40572	0.11387	41360	-0.08695	5.64004e-151
ZFP57_MA1583.1	ZFP57	MA1583.1	C_ZFP57	19795	0.20845	10235	0.22031	10766	-0.22938	1.15849e-150
ZIC5_MA1584.1	ZIC5	MA1584.1	C_ZIC5	101963	0.17454	47609	0.18265	49947	-0.19157	4.87407e-182
ZKSCAN1_MA1585.1	ZKSCAN1	MA1585.1	C_ZKSCAN1	50080	0.08536	12319	0.08271	11850	-0.00304	7.79237e-10
ZNF135_MA1587.1	ZNF135	MA1587.1	C_ZNF135	138398	0.1059	41708	0.10738	42016	-0.08579	6.6561e-154
ZNF136_MA1588.1	ZNF136	MA1588.1	C_ZNF136	71739	0.06737	13808	0.06505	13313	0.03589	5.05636e-102
ZNF140_MA1589.1	ZNF140	MA1589.1	C_ZNF140	78908	0.0914	21014	0.09032	20813	-0.01755	1.30055e-77
ZNF274_MA1592.1	ZNF274	MA1592.1	C_ZNF274	79310	0.07732	18303	0.07555	17747	-0.00106	2.14957e-07
ZNF317_MA1593.1	ZNF317	MA1593.1	C_ZNF317	138140	0.07741	34243	0.07633	33658	-0.01177	2.61541e-68
ZNF382_MA1594.1	ZNF382	MA1594.1	C_ZNF382	70250	0.07725	15801	0.0752	15325	0.00052	0.892675
ZNF460_MA1596.1	ZNF460	MA1596.1	C_ZNF460	269070	0.15598	109740	0.16251	113968	-0.16108	6.44046e-198
ZNF528_MA1597.1	ZNF528	MA1597.1	C_ZNF528	129954	0.08744	34845	0.08704	34776	-0.03194	2.10244e-103
ZNF682_MA1599.1	ZNF682	MA1599.1	C_ZNF682	124919	0.16619	51020	0.17148	52550	-0.1353	9.70972e-170
ZNF684_MA1600.1	ZNF684	MA1600.1	C_ZNF684	114402	0.10065	33560	0.10113	33786	-0.06228	7.77675e-137
ZNF75D_MA1601.2	ZNF75D	MA1601.2	C_ZNF75D	111434	0.08301	28215	0.08234	28027	-0.01707	1.5075e-75
ZSCAN29_MA1602.1	ZSCAN29	MA1602.1	C_ZSCAN29	45408	0.08462	11574	0.08443	11424	-0.057	2.80007e-111
Dmrt1_MA1603.1	Dmrt1	MA1603.1	C_Dmrt1	70733	0.05976	11328	0.05701	10700	0.04277	2.50214e-109
Ebf2_MA1604.1	Ebf2	MA1604.1	C_EBF1	124706	0.09932	38895	0.10027	39596	-0.07436	2.42997e-143
Foxf1_MA1606.1	Foxf1	MA1606.1	C_FOXN3	83527	0.06316	13894	0.06031	13194	0.05199	9.176e-120
Foxl2_MA1607.1	Foxl2	MA1607.1	C_FOXN3	92410	0.0577	13440	0.05454	12529	0.07383	1.07417e-132
Isl1_MA1608.1	Isl1	MA1608.1	C_Isl1	41087	0.07009	8197	0.06765	7755	0.03274	2.05004e-86
Plagl1_MA1615.1	Plagl1	MA1615.1	C_Plagl1	160460	0.13763	64063	0.14171	66010	-0.12484	8.07874e-172
Prdm15_MA1616.1	Prdm15	MA1616.1	C_Prdm15	117157	0.08212	28565	0.08052	27994	-0.00141	8.35943e-05
Ptf1a_MA1618.1	Ptf1a	MA1618.1	C_Neurod2	134246	0.0721	30576	0.07207	30481	-0.03497	4.82861e-111
Ptf1A_MA1619.1	Ptf1A	MA1619.1	C_Tcf12	105761	0.10034	34268	0.10473	35814	-0.12816	1.30969e-165
Ptf1A_MA1620.1	Ptf1A	MA1620.1	C_Rbpjl	115189	0.07372	26910	0.07379	26922	-0.05433	4.58925e-125
Rbpjl_MA1621.1	Rbpjl	MA1621.1	C_Rbpjl	125659	0.07552	30181	0.07568	30285	-0.0618	1.5453e-134
Stat2_MA1623.1	Stat2	MA1623.1	C_Stat2	252407	0.05799	38386	0.05533	37411	0.05306	2.76e-141
Stat5a_MA1624.1	Stat5a	MA1624.1	C_Stat5a	105403	0.07325	22011	0.07065	21256	0.03856	2.61077e-115
Stat5b_MA1625.1	Stat5b	MA1625.1	C_Stat5b	135389	0.07832	30091	0.07643	29323	0.01582	7.26007e-79
Wt1_MA1627.1	Wt1	MA1627.1	C_Wt1	272137	0.14054	100037	0.14569	103841	-0.13194	8.81563e-184
Zic1Zic2_MA1628.1	Zic1::Zic2	MA1628.1	C_Zic2	144595	0.1229	53522	0.1261	54920	-0.11366	4.37422e-160
Zic2_MA1629.1	Zic2	MA1629.1	C_Zic2	209290	0.10341	69171	0.10505	69986	-0.08543	6.0564e-160
ZNF281_MA1630.2	ZNF281	MA1630.2	C_PATZ1	350432	0.15039	132245	0.15583	137969	-0.14482	9.26097e-193
ASCL1_MA1631.1	ASCL1	MA1631.1	C_ASCL1	168154	0.10245	52578	0.10627	54714	-0.12527	1.41837e-171
ATF2_MA1632.1	ATF2	MA1632.1	C_FOSL1::JUN	62780	0.0919	15345	0.08919	14477	0.02781	7.46653e-93
BACH1_MA1633.2	BACH1	MA1633.2	C_FOSL1::JUN	75712	0.06958	15544	0.06663	14364	0.05743	1.24529e-119
BATF_MA1634.1	BATF	MA1634.1	C_FOSL1::JUN	82697	0.06983	17771	0.06697	16545	0.05122	2.3984e-120
BHLHE22_MA1635.1	BHLHE22	MA1635.1	C_Tcf12	114178	0.10362	38379	0.10929	40602	-0.15243	8.35234e-168
CEBPG_MA1636.1	CEBPG	MA1636.1	C_CEBPG	53266	0.06238	8877	0.05861	8126	0.09408	9.33648e-133
EBF3_MA1637.1	EBF3	MA1637.1	C_EBF1	121264	0.10277	39036	0.10417	39843	-0.08317	2.16252e-152
HAND2_MA1638.1	HAND2	MA1638.1	C_Neurod2	138271	0.07479	32913	0.07492	32938	-0.03813	6.04036e-115
MEIS1_MA1639.1	MEIS1	MA1639.1	C_MEIS2	53993	0.05979	7697	0.05609	7040	0.07673	1.50788e-123
MEIS2_MA1640.1	MEIS2	MA1640.1	C_MEIS2	63308	0.05349	7245	0.0497	6610	0.08796	4.34111e-136
MYF5_MA1641.1	MYF5	MA1641.1	C_Tcf12	105456	0.09997	34214	0.10429	35784	-0.12973	1.23578e-161
NEUROG2_MA1642.1	NEUROG2	MA1642.1	C_Neurod2	135610	0.07486	32100	0.07502	32097	-0.03529	4.84798e-116
NFIB_MA1643.1	NFIB	MA1643.1	C_NFIB	128520	0.11527	48026	0.11854	49617	-0.11206	3.84898e-158
NFYC_MA1644.1	NFYC	MA1644.1	C_NFYA	56043	0.1738	15420	0.17274	15210	-0.01174	1.32525e-54
NKX2-2_MA1645.1	NKX2-2	MA1645.1	C_NKX2-2	94608	0.08326	23951	0.08203	23470	-0.01435	6.3349e-69
OSR2_MA1646.1	OSR2	MA1646.1	C_OSR2	159759	0.0854	41880	0.08489	41657	-0.02911	1.80989e-106
Prdm4_MA1647.2	Prdm4	MA1647.2	C_Prdm4	87400	0.081	20669	0.07883	20378	0.00339	7.44197e-12
TCF12_MA1648.1	TCF12	MA1648.1	C_ASCL1	130848	0.12852	46016	0.13422	48207	-0.14982	1.48005e-171
ZBTB12_MA1649.1	ZBTB12	MA1649.1	C_ZBTB12	104225	0.07478	23272	0.07261	22555	-0.01398	1.32082e-63
ZBTB14_MA1650.1	ZBTB14	MA1650.1	C_ZBTB14	70301	0.2837	43919	0.30152	46721	-0.30942	2.41937e-198
ZFP42_MA1651.1	ZFP42	MA1651.1	C_ZFP42	99062	0.10305	26677	0.10321	26674	-0.03075	1.15163e-106
ZKSCAN5_MA1652.1	ZKSCAN5	MA1652.1	C_ZKSCAN5	208354	0.0995	61271	0.09981	61246	-0.05035	1.56005e-138
ZNF148_MA1653.1	ZNF148	MA1653.1	C_PATZ1	309773	0.17308	129970	0.18035	136410	-0.17335	1.18816e-192
ZNF16_MA1654.1	ZNF16	MA1654.1	C_ZNF16	148993	0.09763	44310	0.0986	44956	-0.0725	6.21639e-148
ZNF341_MA1655.1	ZNF341	MA1655.1	C_ZNF341	116854	0.09778	34741	0.0979	35022	-0.05196	2.46289e-127
ZNF449_MA1656.1	ZNF449	MA1656.1	C_ZNF449	126114	0.12471	43157	0.1274	44573	-0.10048	2.97941e-155
ZNF652_MA1657.1	ZNF652	MA1657.1	C_ZNF652	61502	0.06283	10122	0.05977	9737	0.05701	8.53891e-116
FOXA3_MA1683.1	FOXA3	MA1683.1	C_FOXN3	70370	0.06495	12133	0.06206	11520	0.05076	9.66817e-112
Foxn1_MA1684.1	Foxn1	MA1684.1	C_Foxn1	35748	0.2136	19102	0.22252	19944	-0.1971	2.12482e-152
DMRTA1_MA1707.1	DMRTA1	MA1707.1	C_DMRTA1	52417	0.05531	7064	0.05175	6452	0.08789	1.09139e-126
ETV7_MA1708.1	ETV7	MA1708.1	C_Spi1	81235	0.1405	28071	0.13952	27782	-0.01956	4.81197e-75
ZIM3_MA1709.1	ZIM3	MA1709.1	C_ZIM3	180855	0.06191	30680	0.05953	29786	0.03838	2.57209e-125
ZNF257_MA1710.1	ZNF257	MA1710.1	C_ZNF257	252737	0.10689	76439	0.10821	77527	-0.07607	9.01503e-153
ZNF343_MA1711.1	ZNF343	MA1711.1	C_ZNF343	79347	0.14571	31328	0.14999	32159	-0.1202	4.76327e-158
ZNF454_MA1712.1	ZNF454	MA1712.1	C_ZNF454	172988	0.17408	83725	0.18242	87803	-0.19718	1.82699e-195
ZNF610_MA1713.1	ZNF610	MA1713.1	C_ZNF610	132823	0.26519	81480	0.28257	86600	-0.30578	1.11575e-202
ZNF675_MA1714.1	ZNF675	MA1714.1	C_ZNF675	110826	0.08231	26684	0.08098	26615	-0.01052	7.67838e-56
ZNF707_MA1715.1	ZNF707	MA1715.1	C_ZNF707	138703	0.10455	42523	0.1051	42826	-0.06411	1.79928e-135
ZNF76_MA1716.1	ZNF76	MA1716.1	C_ZNF76	112422	0.12313	35451	0.12442	35763	-0.0686	5.12678e-139
ZNF784_MA1717.1	ZNF784	MA1717.1	C_ZNF784	33932	0.08099	7959	0.07893	7677	-0.00322	7.38186e-06
ZNF8_MA1718.1	ZNF8	MA1718.1	C_ZNF8	58712	0.05703	8523	0.05337	7603	0.08262	2.35988e-133
ZNF816_MA1719.1	ZNF816	MA1719.1	C_ZNF816	145259	0.11342	49603	0.11563	50720	-0.09549	3.18843e-153
ZNF85_MA1720.1	ZNF85	MA1720.1	C_ZNF85	70495	0.07278	15086	0.07044	14524	0.01397	5.67289e-64
ZNF93_MA1721.1	ZNF93	MA1721.1	C_ZNF93	127594	0.19855	66089	0.21234	70188	-0.26409	2.56174e-195
ZSCAN31_MA1722.1	ZSCAN31	MA1722.1	C_ZSCAN31	64879	0.09397	17862	0.0937	17887	-0.03829	1.93692e-98
PRDM9_MA1723.1	PRDM9	MA1723.1	C_PRDM9	379763	0.1185	126951	0.12179	131350	-0.11359	3.68782e-183
Rfx6_MA1724.1	Rfx6	MA1724.1	C_Rfx6	104154	0.08715	25813	0.08709	25805	-0.03891	1.85846e-115
ZNF189_MA1725.1	ZNF189	MA1725.1	C_ZNF189	153484	0.08812	41277	0.08716	40843	-0.02898	1.07274e-102
ZNF331_MA1726.1	ZNF331	MA1726.1	C_ZNF331	181194	0.10503	59303	0.1066	59940	-0.08005	3.00648e-149
ZNF417_MA1727.1	ZNF417	MA1727.1	C_ZNF417	49708	0.16077	21785	0.16617	22547	-0.14324	1.52735e-147
ZNF549_MA1728.1	ZNF549	MA1728.1	C_ZNF549	178641	0.11241	62433	0.11638	64922	-0.13431	2.02432e-177
ZNF680_MA1729.1	ZNF680	MA1729.1	C_ZNF680	123968	0.06556	22224	0.06282	21388	0.04286	2.3929e-119
ZNF708_MA1730.1	ZNF708	MA1730.1	C_ZNF708	141733	0.10797	46539	0.10962	47113	-0.08295	9.52154e-149
ZNF768_MA1731.1	ZNF768	MA1731.1	C_ZNF768	217658	0.09763	64723	0.0984	65329	-0.06207	9.27675e-147
BNC2_MA1928.1	BNC2	MA1928.1	C_FOSL1::JUN	78774	0.07122	17567	0.0685	16456	0.04293	2.89313e-111
CTCF_MA1929.1	CTCF	MA1929.1	C_CTCF	194307	0.15012	83619	0.15439	86499	-0.13929	5.51037e-180
CTCF_MA1930.1	CTCF	MA1930.1	C_CTCF	168154	0.14827	73012	0.15197	75197	-0.12717	2.51613e-177
ELK1HOXA1_MA1931.1	ELK1::HOXA1	MA1931.1	C_ELK1::HOXA1	39093	0.14956	12411	0.14866	12222	-0.00974	9.48969e-36
ELK1HOXB13_MA1932.1	ELK1::HOXB13	MA1932.1	C_ELK1::HOXB13	30407	0.12766	8617	0.12647	8523	0.00118	0.59868
ELK1SREBF2_MA1933.1	ELK1::SREBF2	MA1933.1	C_ELK1::SREBF2	36733	0.17215	13615	0.17367	13806	-0.0665	1.13262e-115
ERFFIGLA_MA1934.1	ERF::FIGLA	MA1934.1	C_ETV5::FIGLA	94511	0.10509	29664	0.10681	29916	-0.08335	7.19259e-142
ERFFOXI1_MA1935.1	ERF::FOXI1	MA1935.1	C_ERF::FOXI1	108810	0.09735	30191	0.09471	29304	0.01757	2.339e-75
ERFFOXO1_MA1936.1	ERF::FOXO1	MA1936.1	C_ERF::FOXO1	120190	0.08465	30151	0.08269	29634	0.00081	0.16396
ERFHOXB13_MA1937.1	ERF::HOXB13	MA1937.1	C_ERF::HOXB13	40877	0.08139	8787	0.0789	8515	0.03865	6.21247e-89
ERFNHLH1_MA1938.1	ERF::NHLH1	MA1938.1	C_ERF::NHLH1	98655	0.11861	34061	0.12249	35185	-0.11201	1.50849e-152
ERFSREBF2_MA1939.1	ERF::SREBF2	MA1939.1	C_ERF::SREBF2	36071	0.10347	9644	0.10282	9443	-0.01384	2.17319e-46
ETV2DRGX_MA1940.1	ETV2::DRGX	MA1940.1	C_ETV5::DRGX	39006	0.08122	8255	0.07804	7874	0.04476	1.74326e-91
ETV2FIGLA_MA1941.1	ETV2::FIGLA	MA1941.1	C_ETV5::FIGLA	112706	0.11232	36620	0.11489	37412	-0.1008	3.17231e-151
ETV2FOXI1_MA1942.1	ETV2::FOXI1	MA1942.1	C_ERF::FOXI1	120276	0.09277	33064	0.09034	32193	0.00934	3.52084e-57
ETV2HOXB13_MA1943.1	ETV2::HOXB13	MA1943.1	C_ETV2::HOXB13	30381	0.07607	5926	0.07356	5664	0.04417	1.22704e-90
ETV5DRGX_MA1944.1	ETV5::DRGX	MA1944.1	C_ETV5::DRGX	58035	0.09071	14156	0.08811	13824	0.02389	3.5467e-78
ETV5FIGLA_MA1945.1	ETV5::FIGLA	MA1945.1	C_ETV5::FIGLA	142312	0.10507	44610	0.10742	45451	-0.09393	2.99603e-161
ETV5FOXI1_MA1946.1	ETV5::FOXI1	MA1946.1	C_ERF::FOXI1	96353	0.08888	25496	0.08665	24837	0.00929	3.98887e-52
ETV5FOXO1_MA1947.1	ETV5::FOXO1	MA1947.1	C_ETV5::FOXO1	108264	0.08022	26618	0.07811	25815	0.00941	5.81716e-51
ETV5HOXA2_MA1948.1	ETV5::HOXA2	MA1948.1	C_ETV5::HOXA2	38752	0.09011	9413	0.08725	9174	0.01902	2.52882e-60
FLI1DRGX_MA1949.1	FLI1::DRGX	MA1949.1	C_ETV5::DRGX	40945	0.09335	9850	0.09062	9482	0.02395	4.75636e-72
FLI1FOXI1_MA1950.1	FLI1::FOXI1	MA1950.1	C_ERF::FOXI1	118559	0.08208	29305	0.07905	28247	0.02705	7.51421e-94
FOS_MA1951.1	FOS	MA1951.1	C_FOSL1::JUN	26519	0.13128	7905	0.12979	7679	-0.0055	2.65502e-10
FOXJ2ELF1_MA1952.1	FOXJ2::ELF1	MA1952.1	C_FOXJ2::ELF1	117893	0.08217	26453	0.07916	25584	0.0373	2.4166e-112
FOXO1ELF1_MA1953.1	FOXO1::ELF1	MA1953.1	C_ERF::FOXI1	126578	0.07649	29087	0.07368	28044	0.02449	7.29892e-98
FOXO1ELK1_MA1954.1	FOXO1::ELK1	MA1954.1	C_ERF::FOXI1	129270	0.08238	31673	0.07956	30626	0.02462	4.48593e-94
FOXO1ELK3_MA1955.1	FOXO1::ELK3	MA1955.1	C_ERF::FOXI1	97372	0.08171	23027	0.07907	22292	0.02444	8.55537e-87
FOXO1FLI1_MA1956.1	FOXO1::FLI1	MA1956.1	C_ERF::FOXI1	109736	0.07529	23921	0.07247	23167	0.03506	1.00684e-106
HOXB2ELK1_MA1957.1	HOXB2::ELK1	MA1957.1	C_HOXB2::ELK1	37747	0.1283	11180	0.12661	10933	0.0012	5.6673e-05
HOXD12ELK1_MA1958.1	HOXD12::ELK1	MA1958.1	C_HOXD12::ELK1	42087	0.07919	8451	0.07579	8204	0.04059	1.35619e-90
KLF7_MA1959.1	KLF7	MA1959.1	C_KLF4	217391	0.19067	91967	0.19781	95432	-0.15968	1.36559e-186
MGAEVX1_MA1960.1	MGA::EVX1	MA1960.1	C_MGA::EVX1	56983	0.06363	9634	0.06068	9225	0.04196	1.22764e-98
PATZ1_MA1961.1	PATZ1	MA1961.1	C_PATZ1	295834	0.2029	138773	0.21276	146147	-0.2068	2.87341e-205
POU2F1SOX2_MA1962.1	POU2F1::SOX2	MA1962.1	C_POU2F1::SOX2	82473	0.05488	10092	0.05134	9302	0.09996	8.04142e-138
SATB1_MA1963.1	SATB1	MA1963.1	C_SATB1	42705	0.057	5012	0.05264	4764	0.08729	7.50452e-130
SMAD2_MA1964.1	SMAD2	MA1964.1	C_SMAD2	105985	0.09669	32294	0.0976	32756	-0.07033	6.53655e-137
SP5_MA1965.1	SP5	MA1965.1	C_SP5	266246	0.12806	94770	0.13152	97774	-0.11186	3.24456e-176
TFAP4ETV1_MA1966.1	TFAP4::ETV1	MA1966.1	C_ETV5::FIGLA	123111	0.12657	43665	0.13067	44782	-0.1174	2.30148e-160
TFAP4FLI1_MA1967.1	TFAP4::FLI1	MA1967.1	C_TFAP4::FLI1	115127	0.09779	35072	0.09986	35977	-0.08574	4.53734e-147
TFCP2_MA1968.1	TFCP2	MA1968.1	C_TFCP2	19955	0.08294	4603	0.08109	4576	0.01174	1.7782e-29
THRA_MA1969.1	THRA	MA1969.1	C_THRA	130302	0.09529	38985	0.09544	39118	-0.05568	5.23694e-132
TRPS1_MA1970.1	TRPS1	MA1970.1	C_Gata3	60988	0.05601	8883	0.05362	8351	0.05362	5.94074e-117
ZBED2_MA1971.1	ZBED2	MA1971.1	C_ZBED2	17552	0.14171	6491	0.14272	6600	-0.07253	1.04708e-102
ZFP14_MA1972.1	ZFP14	MA1972.1	C_ZFP14	237644	0.10974	74157	0.11108	75996	-0.08004	2.55946e-162
ZKSCAN3_MA1973.1	ZKSCAN3	MA1973.1	C_ZKSCAN3	138518	0.11147	45565	0.11343	46371	-0.0995	1.55518e-161
ZNF211_MA1974.1	ZNF211	MA1974.1	C_ZNF211	51041	0.05294	6229	0.04915	5215	0.09412	3.1962e-135
ZNF214_MA1975.1	ZNF214	MA1975.1	C_ZNF214	63425	0.07207	13412	0.06988	12946	0.0166	6.77709e-67
ZNF320_MA1976.1	ZNF320	MA1976.1	C_ZNF320	261003	0.1464	106615	0.15253	111668	-0.16485	2.50915e-191
ZNF324_MA1977.1	ZNF324	MA1977.1	C_ZNF324	126790	0.08281	31742	0.08246	31628	-0.04013	3.97021e-119
ZNF354A_MA1978.1	ZNF354A	MA1978.1	C_ZNF354A	128341	0.04777	12210	0.04416	11093	0.11281	5.36059e-159
ZNF416_MA1979.1	ZNF416	MA1979.1	C_ZNF416	130589	0.09644	39776	0.09707	39970	-0.05906	7.84735e-130
ZNF418_MA1980.1	ZNF418	MA1980.1	C_ZNF418	141285	0.07382	31147	0.0724	30710	-0.00102	0.000555571
ZNF530_MA1981.1	ZNF530	MA1981.1	C_ZNF530	298049	0.13695	111611	0.14175	116107	-0.13935	3.31862e-194
ZNF574_MA1982.1	ZNF574	MA1982.1	C_ZNF574	108943	0.14011	41746	0.14414	42948	-0.12299	1.74591e-156
ZNF582_MA1983.1	ZNF582	MA1983.1	C_ZNF582	87278	0.07562	19415	0.0743	19225	-0.00152	0.000135728
ZNF667_MA1984.1	ZNF667	MA1984.1	C_ZNF667	95772	0.0758	21956	0.07418	21223	-0.00749	2.13864e-44
ZNF669_MA1985.1	ZNF669	MA1985.1	C_ZNF669	43276	0.15378	18220	0.1592	18976	-0.14731	1.1609e-155
ZNF692_MA1986.1	ZNF692	MA1986.1	C_ZNF692	106479	0.12646	39991	0.12974	41030	-0.10876	2.117e-152
ZNF701_MA1987.1	ZNF701	MA1987.1	C_ZNF701	283399	0.11569	92516	0.11868	95981	-0.10892	7.24794e-179
Atf3_MA1988.1	Atf3	MA1988.1	C_FOSL1::JUN	83971	0.07053	18409	0.06771	17180	0.04804	4.60754e-118
Bcl11B_MA1989.1	Bcl11B	MA1989.1	C_Bcl11B	126499	0.06633	23901	0.06449	23545	-0.00231	3.44871e-10
Gli1_MA1990.1	Gli1	MA1990.1	C_Gli2	127032	0.10096	39197	0.10208	39621	-0.07316	1.0911e-144
Hnf1A_MA1991.1	Hnf1A	MA1991.1	C_Lef1	102625	0.07243	21897	0.07082	21424	0.01024	4.71349e-55
Ikzf3_MA1992.1	Ikzf3	MA1992.1	C_Erg	208038	0.10559	65166	0.10451	64743	-0.03001	5.3812e-114
Neurod2_MA1993.1	Neurod2	MA1993.1	C_Tcf12	110845	0.10306	36947	0.10837	38971	-0.14664	1.72646e-173
Nkx2-1_MA1994.1	Nkx2-1	MA1994.1	C_Nkx2-1	66288	0.06721	13133	0.06494	12567	0.0342	5.94909e-100
Npas4_MA1995.1	Npas4	MA1995.1	C_Npas4	25115	0.12474	8340	0.12578	8305	-0.06353	4.94532e-103
Nr1H2_MA1996.1	Nr1H2	MA1996.1	C_Nr1H2	100311	0.07871	25356	0.07677	24560	-0.01559	4.40294e-73
Olig2_MA1997.1	Olig2	MA1997.1	C_Tcf12	114668	0.10277	38149	0.10814	40351	-0.14921	2.57897e-172
Prdm14_MA1998.1	Prdm14	MA1998.1	C_Prdm14	66419	0.08134	16345	0.08029	16197	-0.03206	3.36316e-98
Prdm5_MA1999.1	Prdm5	MA1999.1	C_Prdm5	157238	0.08819	42524	0.08798	42568	-0.04175	9.81049e-127
Six4_MA2001.1	Six4	MA2001.1	C_SIX1	69755	0.0688	13446	0.06633	12868	0.0292	5.16244e-90
Zfp335_MA2002.1	Zfp335	MA2002.1	C_Zfp335	151540	0.08955	42880	0.09053	43309	-0.07047	5.38913e-145
NKX2-4_MA2003.1	NKX2-4	MA2003.1	C_NKX2-3	78684	0.07955	18848	0.07818	18537	-0.00959	1.466e-43

## Sheet: 12wkstr neun neg
output_prefix	name	motif_id	cluster	total_tfbs	WT.STR.12W.Neg_footprints_mean_score	WT.STR.12W.Neg_footprints_bound	HD.STR.12W.Neg_footprints_mean_score	HD.STR.12W.Neg_footprints_bound	WT.STR.12W.Neg_footprints_HD.STR.12W.Neg_footprints_change	WT.STR.12W.Neg_footprints_HD.STR.12W.Neg_footprints_pvalue
Runx1_MA0002.2	Runx1	MA0002.2	C_Bcl11B	146497	0.082	56193	0.0824	58542	0.02564	9.72033e-95
TFAP2A_MA0003.4	TFAP2A	MA0003.4	C_TFAP2C	140246	0.09607	61082	0.08714	58492	0.21846	1.03866e-186
Arnt_MA0004.1	Arnt	MA0004.1	C_MYC	45263	0.09675	18737	0.09562	19827	0.02776	9.62801e-77
AhrArnt_MA0006.1	Ahr::Arnt	MA0006.1	C_Ahr::Arnt	61000	0.08599	24179	0.08311	24736	0.08036	1.91125e-132
Ar_MA0007.3	Ar	MA0007.3	C_Ar	49035	0.09353	20134	0.08631	20242	0.1219	1.40383e-147
TBXT_MA0009.2	TBXT	MA0009.2	C_TBXT	39454	0.06307	12940	0.06639	14425	-0.06456	2.88905e-110
PAX5_MA0014.3	PAX5	MA0014.3	C_PAX5	39294	0.1236	18522	0.10901	18166	0.22031	2.26405e-165
NR2F1_MA0017.2	NR2F1	MA0017.2	C_NR2F1	91608	0.08025	36389	0.08033	38121	0.0224	2.49044e-83
CREB1_MA0018.4	CREB1	MA0018.4	C_FOSL1::JUN	78091	0.08849	28647	0.09059	30821	-0.03942	4.00815e-104
Ddit3Cebpa_MA0019.1	Ddit3::Cebpa	MA0019.1	C_Ddit3::Cebpa	42402	0.07246	14399	0.07488	15568	-0.04314	4.04654e-99
E2F1_MA0024.3	E2F1	MA0024.3	C_ZNF417	9513	0.142	4971	0.13182	4722	0.25141	1.29073e-141
NFIL3_MA0025.2	NFIL3	MA0025.2	C_NFIL3	56018	0.05934	13589	0.06308	15350	-0.10129	1.21407e-140
EN1_MA0027.2	EN1	MA0027.2	C_ESX1	31891	0.08685	10574	0.08692	10979	-0.01357	2.68872e-42
ELK1_MA0028.2	ELK1	MA0028.2	C_ETS1	28121	0.17268	14706	0.15332	14460	0.24351	9.11327e-163
Mecom_MA0029.1	Mecom	MA0029.1	C_Mecom	69292	0.05863	18314	0.06195	20332	-0.07675	2.01304e-128
FOXF2_MA0030.1	FOXF2	MA0030.1	C_FOXF2	63424	0.06478	18311	0.06818	20047	-0.07633	3.03341e-130
FOXD1_MA0031.1	FOXD1	MA0031.1	C_FOXN3	65021	0.07434	21611	0.07718	23726	-0.06783	9.00837e-127
FOXC1_MA0032.2	FOXC1	MA0032.2	C_FOXC2	106773	0.0492	22392	0.0529	25260	-0.10521	2.30448e-150
FOXL1_MA0033.2	FOXL1	MA0033.2	C_FOXN3	48756	0.07661	16464	0.07903	17947	-0.06191	6.6982e-109
GATA1_MA0035.4	GATA1	MA0035.4	C_GATA1	44376	0.05896	12357	0.06301	13830	-0.09363	1.31613e-123
GATA2_MA0036.3	GATA2	MA0036.3	C_Gata3	51691	0.05922	14738	0.06349	16742	-0.10337	1.95829e-136
Gata3_MA0037.4	Gata3	MA0037.4	C_Gata3	59164	0.05681	16184	0.06115	18321	-0.1021	1.86288e-142
GFI1_MA0038.2	GFI1	MA0038.2	C_Gfi1B	76361	0.07471	24326	0.07707	26149	-0.04745	2.11818e-113
KLF4_MA0039.4	KLF4	MA0039.4	C_KLF4	287688	0.11392	131007	0.10176	127457	0.20917	6.38404e-205
Foxq1_MA0040.1	Foxq1	MA0040.1	C_Foxq1	74161	0.0587	18874	0.06276	20924	-0.09561	9.26959e-147
FOXD3_MA0041.2	FOXD3	MA0041.2	C_FOXD3	160701	0.05259	36033	0.05557	39054	-0.0693	4.15433e-148
FOXI1_MA0042.2	FOXI1	MA0042.2	C_FOXN3	80421	0.07656	27449	0.07871	29860	-0.05052	5.43617e-121
HLF_MA0043.3	HLF	MA0043.3	C_NFIL3	49820	0.06291	13120	0.06621	14696	-0.08902	4.43379e-131
HNF1A_MA0046.2	HNF1A	MA0046.2	C_HNF1A	49946	0.0467	9696	0.04999	10822	-0.09325	8.02064e-131
FOXA2_MA0047.3	FOXA2	MA0047.3	C_FOXN3	80339	0.06509	23606	0.06837	26351	-0.09321	2.95449e-148
NHLH1_MA0048.2	NHLH1	MA0048.2	C_Tcf12	109209	0.09165	44539	0.09405	45388	0.0561	3.38538e-131
Irf1_MA0050.3	Irf1	MA0050.3	C_Irf1	169670	0.06085	46059	0.06355	49396	-0.05654	2.04535e-138
IRF2_MA0051.1	IRF2	MA0051.1	C_IRF2	76985	0.0661	22455	0.06931	24228	-0.05806	2.37849e-122
MEF2A_MA0052.4	MEF2A	MA0052.4	C_MEF2A	142308	0.04761	27336	0.05042	29981	-0.08199	4.11095e-154
MZF1_MA0056.2	MZF1	MA0056.2	C_MZF1	83707	0.07866	31376	0.07867	32592	0.03518	1.07823e-100
MAX_MA0058.3	MAX	MA0058.3	C_MYC	33449	0.0979	14108	0.0959	14756	0.05181	4.61144e-99
MAXMYC_MA0059.1	MAX::MYC	MA0059.1	C_MAX::MYC	54218	0.08456	20869	0.08381	21873	0.03889	1.18403e-90
NFYA_MA0060.3	NFYA	MA0060.3	C_NFYA	51998	0.15775	21157	0.14905	22031	0.04543	4.76979e-97
GABPA_MA0062.3	GABPA	MA0062.3	C_Erg	184318	0.09057	74754	0.08731	76018	0.0831	3.36324e-155
NKX2-5_MA0063.2	NKX2-5	MA0063.2	C_NKX2-5	64592	0.06847	21177	0.07084	23086	-0.04472	6.47558e-108
PpargRxra_MA0065.2	Pparg::Rxra	MA0065.2	C_Pparg::Rxra	176243	0.08806	71846	0.08547	72932	0.0866	1.78744e-161
PPARG_MA0066.1	PPARG	MA0066.1	C_PPARG	73938	0.08159	29047	0.0817	30676	0.03551	3.61223e-101
PAX2_MA0067.2	PAX2	MA0067.2	C_PAX9	23510	0.10845	10672	0.0969	10308	0.21515	1.80701e-150
PAX4_MA0068.2	PAX4	MA0068.2	C_PAX4	20172	0.06952	5495	0.07042	5894	-0.04146	1.46296e-77
PAX6_MA0069.1	PAX6	MA0069.1	C_PAX6	35541	0.06858	11142	0.07086	11963	-0.04325	4.61946e-94
PBX1_MA0070.1	PBX1	MA0070.1	C_PBX1	44944	0.06586	12020	0.06866	13398	-0.08041	4.06267e-133
RORA_MA0071.1	RORA	MA0071.1	C_RORA	74157	0.07322	27024	0.07508	29169	-0.03052	4.12863e-96
RORA_MA0072.1	RORA	MA0072.1	C_RORA	58594	0.07225	19745	0.07341	21407	-0.03861	1.55743e-98
RREB1_MA0073.1	RREB1	MA0073.1	C_RREB1	252245	0.0785	91626	0.07665	93958	0.05948	1.80412e-148
RXRAVDR_MA0074.1	RXRA::VDR	MA0074.1	C_RXRA::VDR	46050	0.0775	16931	0.07768	17966	0.01128	7.88833e-42
PRRX2_MA0075.3	PRRX2	MA0075.3	C_PAX4	39571	0.06618	10544	0.06806	11332	-0.0576	1.56242e-113
ELK4_MA0076.2	ELK4	MA0076.2	C_ETS1	78111	0.12785	37083	0.11564	36395	0.20068	1.91214e-179
SOX9_MA0077.1	SOX9	MA0077.1	C_Sox17	52436	0.10404	19347	0.10701	20426	-0.04291	3.9706e-102
Sox17_MA0078.2	Sox17	MA0078.2	C_Sox17	90122	0.1055	34113	0.10793	35862	-0.02695	5.95306e-93
SP1_MA0079.5	SP1	MA0079.5	C_PATZ1	239011	0.13467	118029	0.11467	110044	0.3227	1.10166e-220
Spi1_MA0080.6	Spi1	MA0080.6	C_Spi1	257013	0.08299	96394	0.08085	98765	0.05564	2.40298e-149
SPIB_MA0081.2	SPIB	MA0081.2	C_Spi1	217610	0.08571	83734	0.08332	85793	0.06154	3.12674e-144
SRF_MA0083.3	SRF	MA0083.3	C_SRF	27750	0.07206	8918	0.07446	9851	-0.06723	3.31754e-108
SRY_MA0084.1	SRY	MA0084.1	C_SRY	62069	0.06914	16491	0.07309	18090	-0.09144	2.97835e-142
Sox5_MA0087.2	Sox5	MA0087.2	C_Sox17	79683	0.10699	30813	0.10923	32282	-0.01261	9.23457e-64
ZNF143_MA0088.2	ZNF143	MA0088.2	C_ZNF76	83822	0.09166	31249	0.09088	33191	0.00651	1.11812e-35
MAFGNFE2L1_MA0089.2	MAFG::NFE2L1	MA0089.2	C_MAFG::NFE2L1	101591	0.07295	34683	0.07501	37417	-0.02438	1.0783e-94
TEAD1_MA0090.3	TEAD1	MA0090.3	C_TEAD4	93511	0.0712	32238	0.0742	34947	-0.04045	1.26853e-111
TAL1TCF3_MA0091.1	TAL1::TCF3	MA0091.1	C_TAL1::TCF3	93925	0.07033	31032	0.07532	33575	-0.05754	1.79233e-125
Hand1Tcf3_MA0092.1	Hand1::Tcf3	MA0092.1	C_Hand1::Tcf3	89793	0.0766	32838	0.07816	34609	0.00582	7.35879e-26
USF1_MA0093.3	USF1	MA0093.3	C_BHLHE41	75610	0.0899	29280	0.09051	31409	-0.00241	1.83943e-09
Yy1_MA0095.3	Yy1	MA0095.3	C_Yy1	94351	0.07634	29846	0.07723	32036	-0.02773	1.27909e-97
ETS1_MA0098.3	ETS1	MA0098.3	C_ETS1	47612	0.12691	21626	0.11667	21657	0.14132	8.63628e-149
FOSJUN_MA0099.3	FOS::JUN	MA0099.3	C_FOSL1::JUN	70206	0.07007	21572	0.07208	23474	-0.03277	8.29704e-91
MYB_MA0100.3	MYB	MA0100.3	C_MYB	73042	0.07673	26429	0.07855	28022	-0.0038	3.95464e-14
REL_MA0101.1	REL	MA0101.1	C_REL	65125	0.08531	24915	0.08326	25281	0.06998	1.52827e-125
CEBPA_MA0102.4	CEBPA	MA0102.4	C_CEBPB	50479	0.06406	14166	0.06792	15623	-0.08582	7.01487e-129
ZEB1_MA0103.3	ZEB1	MA0103.3	C_ASCL1	137428	0.06319	44972	0.0652	47947	0.023	1.35984e-92
MYCN_MA0104.4	MYCN	MA0104.4	C_MYCN	36840	0.10084	15992	0.09613	16075	0.12533	5.2828e-138
NFKB1_MA0105.4	NFKB1	MA0105.4	C_NFKB2	36279	0.08603	14836	0.08209	14705	0.12679	1.49383e-142
TP53_MA0106.3	TP53	MA0106.3	C_TP53	47790	0.07433	16783	0.07502	18230	-0.01208	6.76535e-49
RELA_MA0107.1	RELA	MA0107.1	C_RELA	72051	0.08069	26916	0.07989	27507	0.0499	2.5604e-107
TBP_MA0108.2	TBP	MA0108.2	C_TBP	42163	0.06619	12311	0.06895	13612	-0.06817	3.39862e-107
Spz1_MA0111.1	Spz1	MA0111.1	C_Spz1	76896	0.08031	29430	0.08021	30733	0.03512	1.39975e-94
ESR1_MA0112.3	ESR1	MA0112.3	C_ESR2	57467	0.08086	22896	0.07949	23683	0.06182	4.31892e-112
NR3C1_MA0113.3	NR3C1	MA0113.3	C_Ar	43657	0.0905	17448	0.08326	17489	0.11096	9.88277e-139
HNF4A_MA0114.4	HNF4A	MA0114.4	C_HNF4G	91355	0.07817	33204	0.0794	35072	0.00316	1.38265e-13
NR1H2RXRA_MA0115.1	NR1H2::RXRA	MA0115.1	C_NR1H2::RXRA	76236	0.07334	27034	0.07467	28944	-0.01331	3.75727e-60
Znf423_MA0116.1	Znf423	MA0116.1	C_Znf423	77627	0.09107	32171	0.08865	32586	0.09219	3.77796e-137
Mafb_MA0117.2	Mafb	MA0117.2	C_MAFF	74264	0.07385	25590	0.07653	27610	-0.03599	1.61115e-102
NFICTLX1_MA0119.1	NFIC::TLX1	MA0119.1	C_NFIB	91680	0.10101	41502	0.10121	41999	0.06625	5.00143e-130
Nkx3-2_MA0122.3	Nkx3-2	MA0122.3	C_ISL2	58770	0.0592	16674	0.06281	18754	-0.09057	2.34291e-139
Nkx3-1_MA0124.2	Nkx3-1	MA0124.2	C_ISL2	55839	0.06845	18531	0.07147	20400	-0.05598	3.56984e-113
Nobox_MA0125.1	Nobox	MA0125.1	C_Dlx2	34461	0.07496	10140	0.07636	10650	-0.03524	8.91553e-83
ZNF354C_MA0130.1	ZNF354C	MA0130.1	C_ZNF354C	215514	0.08686	86113	0.08512	89027	0.05801	9.31814e-148
HINFP_MA0131.2	HINFP	MA0131.2	C_HINFP	34399	0.13397	18560	0.10541	15866	0.56312	6.87481e-206
PDX1_MA0132.2	PDX1	MA0132.2	C_ESX1	32623	0.07057	9575	0.07249	10168	-0.04708	3.01798e-94
Lhx3_MA0135.1	Lhx3	MA0135.1	C_Lhx3	65448	0.04705	11978	0.0506	13379	-0.10597	7.9442e-142
Elf5_MA0136.3	Elf5	MA0136.3	C_Elf5	204794	0.08118	76957	0.07925	78455	0.05953	3.24228e-140
STAT1_MA0137.3	STAT1	MA0137.3	C_Stat4	107020	0.07122	33999	0.07259	35928	-0.01879	1.23902e-78
REST_MA0138.2	REST	MA0138.2	C_REST	129972	0.09137	54603	0.08724	53892	0.14165	8.05534e-177
CTCF_MA0139.1	CTCF	MA0139.1	C_CTCF	162055	0.12493	82699	0.12263	81650	0.13567	2.33398e-175
GATA1TAL1_MA0140.2	GATA1::TAL1	MA0140.2	C_GATA1::TAL1	59440	0.06881	19041	0.07269	21160	-0.07151	2.93929e-123
ESRRB_MA0141.3	ESRRB	MA0141.3	C_NR5A1	76175	0.06947	26598	0.07149	28608	-0.02749	2.26947e-90
Pou5f1Sox2_MA0142.1	Pou5f1::Sox2	MA0142.1	C_Pou5f1::Sox2	106008	0.06131	27404	0.06501	30362	-0.08646	1.84619e-143
SOX2_MA0143.4	SOX2	MA0143.4	C_SOX13	74821	0.09793	27090	0.10118	28866	-0.04967	6.88077e-116
STAT3_MA0144.2	STAT3	MA0144.2	C_Stat4	139033	0.07359	45090	0.07486	47415	-0.01166	1.41204e-63
Tfcp2l1_MA0145.2	Tfcp2l1	MA0145.2	C_Tfcp2l1	117307	0.0992	51620	0.09325	50269	0.17082	3.40804e-175
Zfx_MA0146.2	Zfx	MA0146.2	C_Zfx	139241	0.11944	68534	0.10236	62694	0.34197	1.48385e-207
MYC_MA0147.3	MYC	MA0147.3	C_MYC	57482	0.0963	24559	0.09185	24543	0.13311	4.92729e-149
FOXA1_MA0148.4	FOXA1	MA0148.4	C_FOXN3	81809	0.06351	23189	0.06668	25954	-0.0936	5.35119e-145
EWSR1-FLI1_MA0149.1	EWSR1-FLI1	MA0149.1	C_EWSR1-FLI1	284012	0.08354	106656	0.08113	107949	0.07632	2.34315e-162
Nfe2l2_MA0150.2	Nfe2l2	MA0150.2	C_MAFG::NFE2L1	99220	0.07926	36363	0.08036	38621	0.00721	1.44263e-43
Arid3a_MA0151.1	Arid3a	MA0151.1	C_Arid3a	334755	0.04876	70746	0.05232	79066	-0.09644	3.31298e-176
Nfatc2_MA0152.2	Nfatc2	MA0152.2	C_Nfatc2	119672	0.06525	34385	0.06762	36931	-0.05126	5.60198e-126
HNF1B_MA0153.2	HNF1B	MA0153.2	C_HNF1A	35571	0.05009	7451	0.0537	8394	-0.10616	6.8158e-128
EBF1_MA0154.4	EBF1	MA0154.4	C_EBF1	130422	0.08861	52890	0.08413	52035	0.14443	1.36214e-173
INSM1_MA0155.1	INSM1	MA0155.1	C_INSM1	119334	0.09338	49709	0.08785	49042	0.13928	9.97082e-172
FEV_MA0156.3	FEV	MA0156.3	C_ETS1	32928	0.15745	16589	0.14092	16387	0.21252	2.89123e-158
Foxo3_MA0157.3	Foxo3	MA0157.3	C_FOXN3	69039	0.07251	21890	0.0752	23765	-0.06624	1.32438e-125
HOXA5_MA0158.2	HOXA5	MA0158.2	C_HOXA5	32679	0.0726	10441	0.07538	11381	-0.06038	4.14106e-106
RARARXRA_MA0159.1	RARA::RXRA	MA0159.1	C_RARA::RXRA	86715	0.08477	34656	0.08294	35726	0.06655	2.79611e-132
NR4A2_MA0160.2	NR4A2	MA0160.2	C_NR4A1	83795	0.06725	26445	0.06926	28321	-0.03087	8.8743e-96
NFIC_MA0161.2	NFIC	MA0161.2	C_NFIX	106134	0.09236	44223	0.09221	45001	0.05319	3.58768e-123
EGR1_MA0162.4	EGR1	MA0162.4	C_EGR1	200671	0.11318	92342	0.09588	85703	0.32037	3.53714e-216
PLAG1_MA0163.1	PLAG1	MA0163.1	C_PLAG1	164068	0.10044	72606	0.09182	70352	0.19846	6.69215e-190
Nr2e3_MA0164.1	Nr2e3	MA0164.1	C_Nr2e3	42625	0.07471	14613	0.076	15272	-0.00635	1.39111e-29
ESR2_MA0258.2	ESR2	MA0258.2	C_ESR2	126642	0.08374	51914	0.08212	53421	0.07524	2.48683e-145
ARNTHIF1A_MA0259.1	ARNT::HIF1A	MA0259.1	C_ARNT::HIF1A	27743	0.09017	11506	0.08644	11696	0.09824	1.97471e-119
SOX10_MA0442.2	SOX10	MA0442.2	C_SOX4	139391	0.09602	51406	0.09901	53637	-0.01419	7.29867e-71
Atoh1_MA0461.2	Atoh1	MA0461.2	C_ATOH7	50253	0.05937	14286	0.06468	16290	-0.10798	1.95337e-139
BATFJUN_MA0462.2	BATF::JUN	MA0462.2	C_FOSL1::JUN	83377	0.06886	26067	0.07106	28293	-0.02947	1.82588e-91
BCL6_MA0463.2	BCL6	MA0463.2	C_BCL6	74593	0.07109	24808	0.07287	26215	-0.01441	1.11329e-60
BHLHE40_MA0464.2	BHLHE40	MA0464.2	C_MYC	26106	0.10979	11341	0.10583	11806	0.06202	2.13479e-104
CDX2_MA0465.2	CDX2	MA0465.2	C_CDX2	77609	0.05495	17501	0.0583	19495	-0.09467	2.51155e-145
CEBPB_MA0466.3	CEBPB	MA0466.3	C_CEBPB	6417	0.10243	2374	0.10251	2554	-0.03372	4.35443e-48
Crx_MA0467.2	Crx	MA0467.2	C_OTX2	54578	0.06456	17161	0.0668	18715	-0.04139	2.51773e-98
DUX4_MA0468.1	DUX4	MA0468.1	C_DUX4	53096	0.05925	12931	0.06251	14467	-0.08927	3.41182e-128
E2F3_MA0469.3	E2F3	MA0469.3	C_E2F3	7517	0.08234	2592	0.08375	2705	-0.01178	8.84765e-20
E2F4_MA0470.2	E2F4	MA0470.2	C_ZNF417	9656	0.14015	4896	0.13262	4758	0.18841	3.82067e-130
E2F6_MA0471.2	E2F6	MA0471.2	C_E2F6	188683	0.11601	87204	0.10182	82072	0.26716	9.15887e-213
EGR2_MA0472.2	EGR2	MA0472.2	C_EGR1	61147	0.11446	26909	0.09651	25252	0.30734	8.6829e-188
ELF1_MA0473.3	ELF1	MA0473.3	C_Erg	180182	0.09309	74038	0.08913	74903	0.09413	2.50793e-162
Erg_MA0474.3	Erg	MA0474.3	C_Erg	191423	0.09073	77777	0.08696	78770	0.09121	1.28454e-161
FLI1_MA0475.2	FLI1	MA0475.2	C_ETS1	36878	0.13874	17305	0.12662	17265	0.15887	2.40798e-146
FOS_MA0476.1	FOS	MA0476.1	C_FOSL1::JUN	81005	0.06842	24763	0.07097	26967	-0.03591	8.06183e-104
FOSL1_MA0477.2	FOSL1	MA0477.2	C_FOSL1::JUN	74320	0.0689	22933	0.07112	24901	-0.03057	5.28535e-95
FOSL2_MA0478.1	FOSL2	MA0478.1	C_FOSL1::JUN	110181	0.06884	35565	0.07072	38657	-0.01744	1.4906e-79
FOXH1_MA0479.1	FOXH1	MA0479.1	C_FOXH1	71984	0.0718	23086	0.07533	25585	-0.07688	5.80703e-129
Foxo1_MA0480.2	Foxo1	MA0480.2	C_FOXN3	77787	0.07599	26757	0.07821	28863	-0.04553	1.00453e-110
FOXP1_MA0481.3	FOXP1	MA0481.3	C_FOXN3	77226	0.06631	22412	0.0693	24639	-0.08078	6.26131e-137
GATA4_MA0482.2	GATA4	MA0482.2	C_Gata3	63880	0.06065	18258	0.06475	20555	-0.09019	5.01785e-137
Gfi1B_MA0483.1	Gfi1B	MA0483.1	C_Gfi1B	117991	0.07131	38446	0.07366	41202	-0.03845	1.78262e-114
HNF4G_MA0484.2	HNF4G	MA0484.2	C_HNF4G	92683	0.07904	34155	0.08004	35963	0.00787	1.73387e-46
HOXC9_MA0485.2	HOXC9	MA0485.2	C_HOXC10	24504	0.05371	5825	0.05769	6486	-0.0999	4.53009e-124
HSF1_MA0486.2	HSF1	MA0486.2	C_HSF4	59428	0.06695	17956	0.06794	19029	-0.02159	1.77816e-74
JUN_MA0488.1	JUN	MA0488.1	C_FOSL1::JUN	69841	0.09161	25392	0.09377	27292	-0.04073	6.90451e-104
Jun_MA0489.2	Jun	MA0489.2	C_FOSL1::JUN	77279	0.07084	24798	0.07294	26747	-0.02346	5.52132e-82
JUNB_MA0490.2	JUNB	MA0490.2	C_FOSL1::JUN	75710	0.06822	22957	0.07055	25043	-0.03604	2.49014e-100
JUND_MA0491.2	JUND	MA0491.2	C_FOSL1::JUN	71326	0.06811	21483	0.0705	23418	-0.03615	7.37046e-98
JUND_MA0492.1	JUND	MA0492.1	C_FOSL1::JUN	60066	0.09589	21756	0.09791	23606	-0.04837	1.93761e-106
KLF1_MA0493.2	KLF1	MA0493.2	C_KLF4	251713	0.12556	118396	0.11079	115536	0.21787	5.79501e-205
Nr1h3Rxra_MA0494.1	Nr1h3::Rxra	MA0494.1	C_Nr1h3::Rxra	79719	0.08492	32037	0.08546	33364	0.03058	1.08554e-92
MAFF_MA0495.3	MAFF	MA0495.3	C_MAFF	93315	0.06808	29333	0.07146	32097	-0.06358	4.65854e-133
MAFK_MA0496.3	MAFK	MA0496.3	C_MAFK	119888	0.08031	44981	0.08058	47169	0.02762	5.6299e-95
MEF2C_MA0497.1	MEF2C	MA0497.1	C_MEF2A	142180	0.05006	29676	0.05275	32312	-0.07353	4.13296e-146
MEIS1_MA0498.2	MEIS1	MA0498.2	C_MEIS1	49983	0.07217	16222	0.07423	17471	-0.03841	1.7015e-93
MYOD1_MA0499.2	MYOD1	MA0499.2	C_MYOD1	147869	0.07837	55183	0.08108	57533	0.02475	4.87567e-98
MYOG_MA0500.2	MYOG	MA0500.2	C_Tcf12	106739	0.09771	45537	0.10151	46513	0.03512	2.5332e-107
MAFNFE2_MA0501.1	MAF::NFE2	MA0501.1	C_MAFG::NFE2L1	98298	0.07235	33475	0.07454	36177	-0.02432	8.11529e-90
NFYB_MA0502.2	NFYB	MA0502.2	C_NFYB	70768	0.14398	31225	0.13415	31656	0.10827	9.2603e-149
NR2C2_MA0504.1	NR2C2	MA0504.1	C_NR2C2	153918	0.08979	64084	0.08536	64296	0.11826	1.614e-164
Nr5A2_MA0505.2	Nr5A2	MA0505.2	C_NR5A1	128332	0.07167	47739	0.07237	50486	0.01524	9.97506e-76
Nrf1_MA0506.2	Nrf1	MA0506.2	C_Nrf1	73922	0.14359	38730	0.11338	34077	0.51592	4.3104e-218
POU2F2_MA0507.2	POU2F2	MA0507.2	C_POU1F1	83440	0.0573	19572	0.06204	22260	-0.12033	3.6009e-155
PRDM1_MA0508.3	PRDM1	MA0508.3	C_PRDM1	177561	0.07311	58856	0.07462	62207	-0.00946	6.05313e-66
RFX1_MA0509.3	RFX1	MA0509.3	C_RFX3	41073	0.08892	15251	0.09029	16214	-0.00996	3.64167e-37
RFX5_MA0510.2	RFX5	MA0510.2	C_RFX3	44980	0.0907	16826	0.09151	17727	0.00165	0.0013582
RUNX2_MA0511.2	RUNX2	MA0511.2	C_Bcl11B	37394	0.07924	13571	0.07976	14284	0.00326	3.14283e-09
Rxra_MA0512.2	Rxra	MA0512.2	C_NR2C2	82428	0.07324	30096	0.07402	32071	0.00246	1.81104e-10
Sox3_MA0514.2	Sox3	MA0514.2	C_SOX13	72869	0.10808	28972	0.11091	30454	-0.02517	3.05935e-83
Sox6_MA0515.1	Sox6	MA0515.1	C_Sox6	129524	0.1019	48183	0.10466	50181	-0.01322	1.79245e-69
SP2_MA0516.3	SP2	MA0516.3	C_PATZ1	201593	0.1568	104601	0.13227	98725	0.33329	1.66036e-217
STAT1STAT2_MA0517.1	STAT1::STAT2	MA0517.1	C_STAT1::STAT2	185159	0.06416	52751	0.06598	55611	-0.03185	2.05814e-112
Stat4_MA0518.1	Stat4	MA0518.1	C_Stat4	124562	0.07241	40541	0.07358	42579	-0.0108	9.55972e-59
Stat5aStat5b_MA0519.1	Stat5a::Stat5b	MA0519.1	C_Stat5b	113284	0.07328	37288	0.07434	39384	-0.00713	9.38153e-45
Stat6_MA0520.1	Stat6	MA0520.1	C_Stat6	96233	0.06605	28431	0.06847	30495	-0.04523	5.47593e-112
Tcf12_MA0521.2	Tcf12	MA0521.2	C_Tcf12	109557	0.09879	47296	0.10182	48217	0.03983	1.08485e-111
TCF3_MA0522.3	TCF3	MA0522.3	C_ASCL1	117415	0.08678	45813	0.08114	45217	0.15849	1.2658e-173
TCF7L2_MA0523.1	TCF7L2	MA0523.1	C_Lef1	108999	0.06911	34387	0.07149	36672	-0.03413	9.96766e-106
TFAP2C_MA0524.2	TFAP2C	MA0524.2	C_TFAP2A	80546	0.10172	35908	0.08942	33453	0.28392	1.58345e-184
TP63_MA0525.2	TP63	MA0525.2	C_TP63	35488	0.07048	11128	0.07203	12175	-0.04374	1.19442e-94
USF2_MA0526.4	USF2	MA0526.4	C_BHLHE41	23460	0.12114	10698	0.1181	11111	0.04638	1.40342e-80
ZBTB33_MA0527.1	ZBTB33	MA0527.1	C_ZBTB33	20433	0.14679	11081	0.11628	9576	0.54825	1.04195e-187
ZNF263_MA0528.2	ZNF263	MA0528.2	C_SP5	252236	0.10727	112391	0.09709	108797	0.20082	2.97609e-205
Bach1Mafk_MA0591.1	Bach1::Mafk	MA0591.1	C_MAFK	110421	0.08367	42928	0.08321	44796	0.04942	6.7824e-124
ESRRA_MA0592.3	ESRRA	MA0592.3	C_NR5A1	101700	0.0733	38096	0.07424	40361	0.00775	1.13548e-41
FOXP2_MA0593.1	FOXP2	MA0593.1	C_FOXN3	112143	0.06983	34073	0.07301	36918	-0.06567	3.06023e-138
HOXA9_MA0594.2	HOXA9	MA0594.2	C_HOXA9	5929	0.08848	2135	0.08876	2268	-0.02216	3.92947e-33
SREBF1_MA0595.1	SREBF1	MA0595.1	C_SREBF1	69074	0.0851	26526	0.08405	27927	0.03194	5.37964e-94
SREBF2_MA0596.1	SREBF2	MA0596.1	C_SREBF1	73025	0.07928	27199	0.07969	28895	0.00658	1.69028e-34
THAP1_MA0597.2	THAP1	MA0597.2	C_THAP1	164869	0.10187	74414	0.09382	71690	0.20331	4.78305e-188
EHF_MA0598.3	EHF	MA0598.3	C_Erg	164916	0.09193	66897	0.08833	67881	0.08242	3.07206e-154
KLF5_MA0599.1	KLF5	MA0599.1	C_KLF4	295781	0.12581	137767	0.1119	135306	0.20066	3.71743e-202
RFX2_MA0600.2	RFX2	MA0600.2	C_RFX3	40599	0.08959	15042	0.09074	15993	-0.0159	5.02052e-54
Arid3b_MA0601.1	Arid3b	MA0601.1	C_Arid3b	63452	0.05067	11513	0.0539	13117	-0.11245	7.38922e-147
Arid5a_MA0602.1	Arid5a	MA0602.1	C_Arid5a	38979	0.05025	7223	0.05417	8382	-0.12916	3.5311e-145
Arntl_MA0603.1	Arntl	MA0603.1	C_MYC	29155	0.10998	12785	0.10672	13297	0.05813	8.19923e-105
Atf1_MA0604.1	Atf1	MA0604.1	C_Atf1	15857	0.14544	7113	0.1362	7487	0.06142	6.25495e-90
ATF3_MA0605.2	ATF3	MA0605.2	C_FOSL1::JUN	23515	0.12761	10147	0.12726	10783	-0.0184	1.017e-48
Nfat5_MA0606.2	Nfat5	MA0606.2	C_Nfat5	139342	0.05889	35510	0.0617	38444	-0.06336	3.71348e-140
BHLHA15_MA0607.2	BHLHA15	MA0607.2	C_ATOH7	39983	0.05638	10902	0.06101	12375	-0.09311	2.3549e-125
Creb3l2_MA0608.1	Creb3l2	MA0608.1	C_Creb3l2	26247	0.1077	11314	0.10405	11789	0.05141	8.2809e-93
CREM_MA0609.2	CREM	MA0609.2	C_FOSL1::JUN	30044	0.12396	13617	0.1204	14119	0.04299	1.96407e-85
DMRT3_MA0610.1	DMRT3	MA0610.1	C_DMRT3	47593	0.05823	13214	0.06275	15086	-0.10606	3.37511e-139
Dux_MA0611.2	Dux	MA0611.2	C_Dux	36366	0.05832	9310	0.06208	10369	-0.09144	6.51287e-120
EMX1_MA0612.2	EMX1	MA0612.2	C_ESX1	16857	0.08329	5380	0.08445	5700	-0.04245	1.17787e-78
FOXG1_MA0613.1	FOXG1	MA0613.1	C_FOXN3	83143	0.06348	23024	0.06695	25481	-0.08807	1.01927e-141
Foxj2_MA0614.1	Foxj2	MA0614.1	C_FOXN3	58381	0.06763	16791	0.07077	18384	-0.07588	4.87335e-120
Gmeb1_MA0615.1	Gmeb1	MA0615.1	C_Gmeb1	9308	0.1431	4483	0.12592	4436	0.21914	1.51233e-130
HES2_MA0616.2	HES2	MA0616.2	C_MYC	34510	0.1209	16340	0.10494	15799	0.27031	9.38596e-175
LBX1_MA0618.1	LBX1	MA0618.1	C_PAX4	44921	0.06228	11768	0.0643	12582	-0.05423	8.77586e-107
LIN54_MA0619.1	LIN54	MA0619.1	C_LIN54	84864	0.05009	17371	0.0539	19257	-0.10402	5.16085e-153
MITF_MA0620.3	MITF	MA0620.3	C_BHLHE41	33681	0.10626	13955	0.10631	14960	-0.00833	5.20017e-25
mix-a_MA0621.1	mix-a	MA0621.1	C_ARGFX	45696	0.05774	10504	0.05997	11326	-0.06744	2.73275e-114
Mlxip_MA0622.1	Mlxip	MA0622.1	C_MYC	36072	0.09631	14997	0.09487	15740	0.03939	4.01629e-94
NEUROG1_MA0623.2	NEUROG1	MA0623.2	C_ATOH7	34480	0.05607	9670	0.06014	11093	-0.1057	4.71938e-129
Nfatc1_MA0624.2	Nfatc1	MA0624.2	C_Nfatc2	121370	0.06396	34532	0.06664	37246	-0.0548	1.18193e-124
NFATC3_MA0625.2	NFATC3	MA0625.2	C_Nfatc2	71545	0.06823	21295	0.07034	22994	-0.0469	9.18466e-115
Npas2_MA0626.1	Npas2	MA0626.1	C_MYC	33475	0.09154	13710	0.09034	14521	0.03844	4.99458e-89
POU2F3_MA0627.2	POU2F3	MA0627.2	C_POU2F3	100473	0.05549	23333	0.0601	26577	-0.11748	6.15077e-155
POU6F1_MA0628.1	POU6F1	MA0628.1	C_EMX2	22410	0.07081	5815	0.07213	6220	-0.05468	1.40979e-94
Rhox11_MA0629.1	Rhox11	MA0629.1	C_Rhox11	43714	0.07361	15006	0.07736	16190	-0.05663	1.77049e-110
SHOX_MA0630.1	SHOX	MA0630.1	C_PAX4	35593	0.07388	10183	0.07405	10686	-0.02802	7.95872e-77
Six3_MA0631.1	Six3	MA0631.1	C_Six3	34377	0.05969	10421	0.06375	11737	-0.08596	3.3146e-123
TCFL5_MA0632.2	TCFL5	MA0632.2	C_TCFL5	35856	0.13414	18695	0.10546	16581	0.48837	5.27807e-196
Twist2_MA0633.2	Twist2	MA0633.2	C_Tcf12	118036	0.09993	51112	0.10318	51933	0.04375	5.48925e-119
ALX3_MA0634.1	ALX3	MA0634.1	C_PAX4	45736	0.06691	11990	0.0686	12804	-0.05383	4.01804e-106
BARHL2_MA0635.1	BARHL2	MA0635.1	C_BARHL2	18079	0.06784	5539	0.07147	5992	-0.06351	1.31393e-93
BHLHE41_MA0636.1	BHLHE41	MA0636.1	C_BHLHE41	22013	0.12032	10008	0.11673	10455	0.056	2.65304e-91
CREB3_MA0638.1	CREB3	MA0638.1	C_CREB3L4	24992	0.11181	10610	0.10647	10969	0.06853	6.85475e-107
DBP_MA0639.1	DBP	MA0639.1	C_NFIL3	23094	0.07014	6238	0.07269	7002	-0.08597	6.24065e-113
ELF3_MA0640.2	ELF3	MA0640.2	C_Erg	193736	0.08911	77919	0.08579	78835	0.0879	1.42576e-163
ELF4_MA0641.1	ELF4	MA0641.1	C_Erg	49279	0.12644	22704	0.11631	22732	0.14901	9.43569e-157
EN2_MA0642.2	EN2	MA0642.2	C_DLX6	39786	0.07619	11797	0.0771	12379	-0.03084	1.33393e-85
Esrrg_MA0643.1	Esrrg	MA0643.1	C_NR5A1	71421	0.07079	25875	0.07265	27473	-0.01436	1.37247e-63
ESX1_MA0644.2	ESX1	MA0644.2	C_ESX1	39568	0.07792	11921	0.07856	12570	-0.02924	1.40568e-84
ETV6_MA0645.1	ETV6	MA0645.1	C_Spi1	61834	0.12874	29649	0.11773	29514	0.16914	1.80808e-166
GCM1_MA0646.1	GCM1	MA0646.1	C_GCM2	51511	0.08194	20320	0.07955	20722	0.0928	4.23688e-128
GRHL1_MA0647.1	GRHL1	MA0647.1	C_GRHL2	29174	0.06285	8699	0.06573	9429	-0.04954	2.17581e-95
GSC_MA0648.1	GSC	MA0648.1	C_OTX2	31006	0.0754	10805	0.07753	11711	-0.03777	4.41881e-84
HEY2_MA0649.1	HEY2	MA0649.1	C_MYC	36251	0.09784	15165	0.09217	15384	0.12451	1.56138e-137
Hoxa13_MA0650.3	Hoxa13	MA0650.3	C_HOXB13	75435	0.05865	17626	0.06153	19414	-0.08095	2.58214e-137
HOXC11_MA0651.2	HOXC11	MA0651.2	C_HOXC10	19973	0.05828	5272	0.06185	5786	-0.07617	1.87528e-108
IRF8_MA0652.1	IRF8	MA0652.1	C_Irf1	48476	0.07268	15782	0.07467	16857	-0.03629	2.68821e-99
IRF9_MA0653.1	IRF9	MA0653.1	C_Irf1	64719	0.06832	19083	0.07081	20350	-0.04408	3.31368e-107
ISX_MA0654.1	ISX	MA0654.1	C_PAX4	42838	0.07223	12204	0.07276	12859	-0.03472	1.71945e-82
JDP2_MA0655.1	JDP2	MA0655.1	C_FOSL1::JUN	60143	0.06293	16669	0.06581	18396	-0.06084	1.56821e-118
JDP2_MA0656.1	JDP2	MA0656.1	C_FOSL1::JUN	29940	0.11839	12364	0.11895	13189	-0.02678	2.56036e-71
KLF13_MA0657.1	KLF13	MA0657.1	C_KLF13	62328	0.13865	28906	0.12515	28948	0.14926	4.74938e-157
LHX6_MA0658.1	LHX6	MA0658.1	C_EMX2	26794	0.0713	7456	0.07251	7949	-0.04773	1.63267e-90
Mafg_MA0659.3	Mafg	MA0659.3	C_MAFK	126709	0.07851	47240	0.0786	49564	0.03567	1.82911e-110
MEF2B_MA0660.1	MEF2B	MA0660.1	C_MEF2A	67310	0.05541	15191	0.058	16625	-0.06872	3.72955e-128
MEOX1_MA0661.1	MEOX1	MA0661.1	C_EMX2	35277	0.07001	10341	0.07219	11126	-0.05887	6.94752e-102
MIXL1_MA0662.1	MIXL1	MA0662.1	C_PAX4	35869	0.07393	10429	0.07415	10873	-0.02529	5.90159e-67
MLX_MA0663.1	MLX	MA0663.1	C_MYC	22097	0.11481	9623	0.11288	10023	0.02039	2.03767e-49
MLXIPL_MA0664.1	MLXIPL	MA0664.1	C_MYC	23069	0.11105	10103	0.1096	10622	0.01483	7.80478e-42
MSC_MA0665.1	MSC	MA0665.1	C_MSC	110050	0.08307	41737	0.08746	44059	-0.01961	1.37962e-85
MSX1_MA0666.2	MSX1	MA0666.2	C_DLX6	39206	0.07428	11836	0.07508	12309	-0.0206	1.03058e-64
MYF6_MA0667.1	MYF6	MA0667.1	C_Tcf21	64318	0.07661	22808	0.0818	24681	-0.05952	9.18052e-121
Neurod2_MA0668.2	Neurod2	MA0668.2	C_Neurod2	156713	0.0814	57931	0.08491	60829	-0.0056	1.66498e-43
NEUROG2_MA0669.1	NEUROG2	MA0669.1	C_ATOH7	57223	0.06596	17791	0.07068	19709	-0.07576	5.43271e-127
NFIA_MA0670.1	NFIA	MA0670.1	C_NFIX	87488	0.08655	34094	0.08867	35380	0.00624	1.52636e-31
NFIX_MA0671.1	NFIX	MA0671.1	C_NFIX	94279	0.093	38828	0.09355	39627	0.04486	1.20117e-114
NKX2-3_MA0672.1	NKX2-3	MA0672.1	C_NKX2-3	74018	0.0738	26211	0.07531	27990	-0.01798	1.00821e-67
NKX2-8_MA0673.1	NKX2-8	MA0673.1	C_NKX2-3	64370	0.07126	22161	0.07298	23700	-0.02447	2.15418e-82
NKX6-1_MA0674.1	NKX6-1	MA0674.1	C_LHX5	52155	0.05986	13775	0.06279	15086	-0.06792	2.43843e-123
NKX6-2_MA0675.1	NKX6-2	MA0675.1	C_LHX5	51985	0.06094	13818	0.06318	14934	-0.05619	1.84632e-118
Nr2e1_MA0676.1	Nr2e1	MA0676.1	C_Nr2e1	69409	0.05806	18545	0.06138	20417	-0.07222	1.20706e-125
Nr2f6_MA0677.1	Nr2f6	MA0677.1	C_NR2C2	89555	0.07477	33616	0.07516	35380	0.01506	2.24467e-68
OLIG2_MA0678.1	OLIG2	MA0678.1	C_ATOH7	33142	0.05021	7941	0.05491	9393	-0.13633	5.72498e-144
ONECUT1_MA0679.2	ONECUT1	MA0679.2	C_ONECUT1	78011	0.04703	14859	0.05014	16609	-0.09547	1.3655e-143
Pax7_MA0680.2	Pax7	MA0680.2	C_Pax7	50992	0.04733	9448	0.05096	10640	-0.1134	3.59584e-135
PHOX2B_MA0681.2	PHOX2B	MA0681.2	C_PHOX2A	91801	0.04398	14442	0.04727	16410	-0.12173	5.58087e-158
PITX1_MA0682.2	PITX1	MA0682.2	C_OTX2	51062	0.06684	16634	0.06907	18138	-0.03232	5.36956e-88
POU4F2_MA0683.1	POU4F2	MA0683.1	C_POU4F2	73476	0.05188	15336	0.05601	17460	-0.11372	1.0703e-152
RUNX3_MA0684.2	RUNX3	MA0684.2	C_RUNX3	78118	0.07082	26074	0.07269	27900	-0.02543	3.36032e-93
SP4_MA0685.2	SP4	MA0685.2	C_PATZ1	256846	0.13187	124470	0.11364	118344	0.2824	3.04868e-213
SPDEF_MA0686.1	SPDEF	MA0686.1	C_SPDEF	28213	0.11944	12440	0.1117	12548	0.1181	8.58879e-136
SPIC_MA0687.1	SPIC	MA0687.1	C_SPIC	103819	0.07675	36087	0.07605	37368	0.01614	1.94677e-75
TBX2_MA0688.1	TBX2	MA0688.1	C_TBX18	70879	0.061	21740	0.06394	24010	-0.05767	2.02373e-124
TBX20_MA0689.1	TBX20	MA0689.1	C_TBX18	75050	0.06398	23679	0.06634	25945	-0.0485	2.12562e-111
TBX21_MA0690.2	TBX21	MA0690.2	C_TBX18	69666	0.06301	21790	0.06568	23916	-0.04766	2.75434e-112
TFAP4_MA0691.1	TFAP4	MA0691.1	C_TFAP4	88738	0.09216	36092	0.09593	37686	-0.0013	0.000833216
TFEB_MA0692.1	TFEB	MA0692.1	C_BHLHE41	47014	0.10243	19586	0.10218	20759	0.00961	2.50859e-37
Vdr_MA0693.3	Vdr	MA0693.3	C_Vdr	93888	0.06704	31575	0.06913	34105	-0.02806	3.50928e-97
ZBTB7B_MA0694.1	ZBTB7B	MA0694.1	C_ZBTB7B	56856	0.08594	22554	0.08069	22474	0.14427	6.75242e-151
ZBTB7C_MA0695.1	ZBTB7C	MA0695.1	C_ZBTB7B	64739	0.08807	26102	0.08189	25724	0.16254	1.34137e-162
ZIC1_MA0696.1	ZIC1	MA0696.1	C_ZIC5	103445	0.10732	48709	0.09701	46221	0.25652	2.21047e-194
Zic3_MA0697.2	Zic3	MA0697.2	C_Zic2	208222	0.09381	87990	0.08876	86087	0.16526	5.77972e-184
ZBTB18_MA0698.1	ZBTB18	MA0698.1	C_TWIST1	127463	0.07443	45313	0.07911	49034	-0.04682	8.45842e-121
LBX2_MA0699.1	LBX2	MA0699.1	C_PAX4	34143	0.07998	10515	0.07991	10948	-0.02308	4.52646e-62
LHX2_MA0700.2	LHX2	MA0700.2	C_DLX6	43432	0.07167	11665	0.0727	12336	-0.04802	1.23475e-101
LHX9_MA0701.2	LHX9	MA0701.2	C_PAX4	35593	0.07388	10183	0.07405	10686	-0.02802	7.95872e-77
LMX1A_MA0702.2	LMX1A	MA0702.2	C_ARGFX	33834	0.05683	8355	0.05972	9065	-0.07076	1.59636e-108
LMX1B_MA0703.2	LMX1B	MA0703.2	C_ARGFX	51455	0.05002	10877	0.05311	11903	-0.08285	1.54626e-128
Lhx4_MA0704.1	Lhx4	MA0704.1	C_ARGFX	27053	0.05352	6230	0.05576	6729	-0.05936	2.205e-99
Lhx8_MA0705.1	Lhx8	MA0705.1	C_PAX4	34655	0.07275	10176	0.07443	10878	-0.04404	1.15709e-91
MEOX2_MA0706.1	MEOX2	MA0706.1	C_LHX5	43031	0.06085	11220	0.06392	12238	-0.07675	8.50518e-123
MNX1_MA0707.2	MNX1	MA0707.2	C_MNX1	38490	0.06144	9738	0.06528	10852	-0.11605	4.74666e-135
MSX2_MA0708.2	MSX2	MA0708.2	C_DLX6	46789	0.07225	13759	0.07346	14355	-0.02734	1.83878e-82
Msx3_MA0709.1	Msx3	MA0709.1	C_DLX6	39206	0.07428	11836	0.07507	12309	-0.02058	1.12748e-64
NOTO_MA0710.1	NOTO	MA0710.1	C_EMX2	37175	0.07761	11747	0.07885	12470	-0.02876	6.87056e-80
OTX1_MA0711.1	OTX1	MA0711.1	C_OTX2	31179	0.06434	9641	0.06626	10557	-0.02743	2.70825e-73
OTX2_MA0712.2	OTX2	MA0712.2	C_OTX2	63271	0.06391	19530	0.06635	21406	-0.04602	1.41446e-117
PHOX2A_MA0713.1	PHOX2A	MA0713.1	C_PHOX2A	44893	0.0504	8787	0.05385	9840	-0.10704	2.06048e-140
PITX3_MA0714.1	PITX3	MA0714.1	C_OTX2	47965	0.06794	15080	0.07002	16473	-0.03477	2.2983e-93
PROP1_MA0715.1	PROP1	MA0715.1	C_PHOX2A	51834	0.04786	9056	0.05117	10220	-0.11433	2.12829e-141
PRRX1_MA0716.1	PRRX1	MA0716.1	C_PAX4	35593	0.07388	10183	0.07405	10686	-0.02802	7.95872e-77
RAX2_MA0717.1	RAX2	MA0717.1	C_PAX4	35593	0.07388	10183	0.07405	10686	-0.02802	7.95872e-77
RAX_MA0718.1	RAX	MA0718.1	C_GBX2	34222	0.07349	9988	0.07456	10552	-0.03708	3.40499e-86
RHOXF1_MA0719.1	RHOXF1	MA0719.1	C_OTX2	58274	0.06672	18992	0.06842	20465	-0.01661	1.14179e-64
Shox2_MA0720.1	Shox2	MA0720.1	C_PAX4	35593	0.07388	10183	0.07405	10686	-0.02802	7.95872e-77
UNCX_MA0721.1	UNCX	MA0721.1	C_PAX4	35593	0.07388	10183	0.07405	10686	-0.02802	7.95872e-77
VAX1_MA0722.1	VAX1	MA0722.1	C_ESX1	38164	0.06481	10066	0.06733	10913	-0.07309	3.61607e-119
VAX2_MA0723.2	VAX2	MA0723.2	C_ESX1	25933	0.08787	8668	0.08757	8972	-0.00988	1.00131e-26
VENTX_MA0724.1	VENTX	MA0724.1	C_VENTX	23856	0.07982	7569	0.08125	8106	-0.0514	2.70823e-92
VSX1_MA0725.1	VSX1	MA0725.1	C_PAX4	39571	0.06618	10544	0.06806	11332	-0.05762	1.50974e-113
VSX2_MA0726.1	VSX2	MA0726.1	C_PAX4	39571	0.06618	10544	0.06806	11332	-0.05762	1.50974e-113
NR3C2_MA0727.1	NR3C2	MA0727.1	C_Ar	46422	0.09158	18642	0.08424	18654	0.11104	2.79026e-137
Nr2F6_MA0728.1	Nr2F6	MA0728.1	C_Nr2F6	83970	0.0715	29275	0.07259	31173	-0.00483	9.21863e-27
RARA_MA0729.1	RARA	MA0729.1	C_RARA	77694	0.06742	25677	0.06946	27789	-0.03098	6.43207e-95
RARA_MA0730.1	RARA	MA0730.1	C_RARA	76882	0.08238	30441	0.0818	31772	0.04168	1.61413e-108
BCL6B_MA0731.1	BCL6B	MA0731.1	C_BCL6B	88286	0.06563	27413	0.06802	29328	-0.03308	3.00576e-100
EGR3_MA0732.1	EGR3	MA0732.1	C_EGR1	103427	0.1187	47636	0.10052	44290	0.31642	5.1534e-197
EGR4_MA0733.1	EGR4	MA0733.1	C_EGR1	119360	0.11252	53470	0.09864	51050	0.24704	2.58666e-197
Gli2_MA0734.3	Gli2	MA0734.3	C_Gli2	126996	0.09014	52804	0.08574	52867	0.12232	1.89916e-166
GLIS1_MA0735.1	GLIS1	MA0735.1	C_GLIS1	42001	0.09511	17601	0.08789	17192	0.16228	2.73789e-155
GLIS2_MA0736.1	GLIS2	MA0736.1	C_GLIS2	76587	0.10083	34394	0.09014	32345	0.24687	1.60502e-182
GLIS3_MA0737.1	GLIS3	MA0737.1	C_GLIS2	60585	0.09009	24619	0.08584	24565	0.11145	5.76118e-140
HIC2_MA0738.1	HIC2	MA0738.1	C_HIC2	87757	0.09038	35781	0.08818	36087	0.09221	7.10322e-148
Hic1_MA0739.1	Hic1	MA0739.1	C_Hic1	94577	0.08812	37053	0.08838	38209	0.04802	3.6334e-122
KLF14_MA0740.2	KLF14	MA0740.2	C_KLF4	250834	0.13259	120025	0.11592	116410	0.24054	1.29027e-205
KLF16_MA0741.1	KLF16	MA0741.1	C_KLF9	228030	0.12923	107382	0.11336	104068	0.23546	1.01484e-203
KLF12_MA0742.2	KLF12	MA0742.2	C_PATZ1	222290	0.14411	112718	0.12138	105185	0.34116	6.32995e-223
SCRT1_MA0743.2	SCRT1	MA0743.2	C_SCRT2	72824	0.07139	25684	0.07483	27671	-0.02789	1.25797e-94
SCRT2_MA0744.2	SCRT2	MA0744.2	C_SCRT2	77883	0.07386	27976	0.07613	29814	-0.00674	4.09132e-41
SNAI2_MA0745.2	SNAI2	MA0745.2	C_ASCL1	117950	0.06143	38257	0.06424	41515	-0.00522	2.56946e-34
SP3_MA0746.2	SP3	MA0746.2	C_KLF9	191248	0.14369	93628	0.12338	90034	0.27212	2.08729e-204
SP8_MA0747.1	SP8	MA0747.1	C_KLF9	200750	0.12319	92105	0.1094	89919	0.20587	8.97188e-194
YY2_MA0748.2	YY2	MA0748.2	C_YY2	35810	0.13778	18688	0.11661	16728	0.42762	2.64024e-189
ZBED1_MA0749.1	ZBED1	MA0749.1	C_ZBED1	5960	0.09633	2195	0.0941	2312	0.01473	7.43793e-18
ZBTB7A_MA0750.2	ZBTB7A	MA0750.2	C_ETS1	91367	0.1289	44269	0.11357	42299	0.26433	1.02071e-192
ZIC4_MA0751.1	ZIC4	MA0751.1	C_ZIC5	99486	0.11097	47767	0.09889	44564	0.28919	3.10001e-203
ZNF410_MA0752.1	ZNF410	MA0752.1	C_ZNF410	46835	0.06403	13569	0.067	14964	-0.0701	6.34438e-119
ZNF740_MA0753.2	ZNF740	MA0753.2	C_ZNF740	206416	0.10933	93236	0.09869	90465	0.20171	1.19078e-195
CUX1_MA0754.2	CUX1	MA0754.2	C_ONECUT1	15625	0.05137	3542	0.05443	4009	-0.09705	7.15036e-106
CUX2_MA0755.1	CUX2	MA0755.1	C_ONECUT1	13738	0.05083	3118	0.05404	3560	-0.10155	1.56482e-103
ONECUT2_MA0756.2	ONECUT2	MA0756.2	C_ONECUT2	11221	0.06681	3137	0.06892	3413	-0.06429	4.29268e-84
ONECUT3_MA0757.1	ONECUT3	MA0757.1	C_ONECUT1	66027	0.0463	12176	0.04946	13606	-0.09711	8.22194e-141
E2F7_MA0758.1	E2F7	MA0758.1	C_E2F7	39854	0.07531	12921	0.07605	13443	-0.00792	6.06773e-28
ELK3_MA0759.2	ELK3	MA0759.2	C_ETS1	26842	0.18566	14594	0.16184	14167	0.30146	1.15938e-173
ERF_MA0760.1	ERF	MA0760.1	C_ETS1	41310	0.12632	18695	0.11679	18866	0.12993	2.47774e-146
ETV1_MA0761.2	ETV1	MA0761.2	C_Erg	185755	0.08926	74676	0.08598	75838	0.08242	1.88405e-156
ETV2_MA0762.1	ETV2	MA0762.1	C_ETS1	51133	0.10755	21170	0.10231	21468	0.07945	8.27587e-122
ETV3_MA0763.1	ETV3	MA0763.1	C_ETS1	30425	0.14429	14361	0.13184	14516	0.14655	3.97815e-139
ETV4_MA0764.3	ETV4	MA0764.3	C_ETS1	30955	0.17023	16249	0.15035	15904	0.25579	5.39675e-163
ETV5_MA0765.3	ETV5	MA0765.3	C_ETS1	27298	0.17188	14257	0.15272	14018	0.23872	6.44369e-161
GATA5_MA0766.2	GATA5	MA0766.2	C_Gata3	41811	0.06481	12965	0.06914	14466	-0.08786	6.52467e-123
GCM2_MA0767.1	GCM2	MA0767.1	C_GCM2	41396	0.08228	15938	0.0789	16303	0.1	5.1347e-131
Lef1_MA0768.2	Lef1	MA0768.2	C_Lef1	109937	0.07097	35498	0.07324	37808	-0.02211	2.21524e-94
TCF7_MA0769.2	TCF7	MA0769.2	C_Lef1	87573	0.06547	26678	0.06809	28558	-0.03708	6.25474e-107
HSF2_MA0770.1	HSF2	MA0770.1	C_HSF4	67665	0.06599	20301	0.06703	21518	-0.02498	8.5301e-81
HSF4_MA0771.1	HSF4	MA0771.1	C_HSF4	59665	0.07161	19360	0.0722	20356	-0.00533	4.93321e-20
IRF7_MA0772.1	IRF7	MA0772.1	C_IRF7	88912	0.05799	22569	0.06124	24195	-0.07083	3.10509e-132
MEF2D_MA0773.1	MEF2D	MA0773.1	C_MEF2A	77558	0.05314	16714	0.05584	18252	-0.07526	6.21656e-131
MEIS2_MA0774.1	MEIS2	MA0774.1	C_MEIS2	107995	0.07993	39055	0.08101	41173	0.00797	9.72399e-45
MEIS3_MA0775.1	MEIS3	MA0775.1	C_MEIS2	87611	0.07852	31265	0.07982	33173	-0.00029	0.0377829
MYBL1_MA0776.1	MYBL1	MA0776.1	C_MYBL1	10943	0.07677	3882	0.07869	4215	-0.04837	7.07232e-75
MYBL2_MA0777.1	MYBL2	MA0777.1	C_MYBL2	10820	0.08221	3881	0.08307	4084	-0.00713	1.6742e-11
NFKB2_MA0778.1	NFKB2	MA0778.1	C_NFKB2	37755	0.08954	15766	0.08462	15519	0.13974	8.88916e-146
PAX1_MA0779.1	PAX1	MA0779.1	C_PAX9	30834	0.09163	12205	0.08808	12643	0.07533	1.02514e-112
PAX3_MA0780.1	PAX3	MA0780.1	C_Pax7	20308	0.0519	4044	0.05551	4491	-0.10876	3.17431e-118
PAX9_MA0781.1	PAX9	MA0781.1	C_PAX9	35149	0.09011	13851	0.08695	14381	0.06946	1.47295e-110
PKNOX1_MA0782.2	PKNOX1	MA0782.2	C_PBX3	112042	0.0857	41856	0.08553	43868	0.01948	3.99626e-91
PKNOX2_MA0783.1	PKNOX2	MA0783.1	C_TGIF2LX	83250	0.07062	28613	0.07365	30989	-0.03037	8.34563e-95
POU1F1_MA0784.2	POU1F1	MA0784.2	C_POU1F1	78240	0.05758	18141	0.06226	20500	-0.1168	6.87595e-153
POU2F1_MA0785.1	POU2F1	MA0785.1	C_POU1F1	80701	0.0595	18593	0.0641	21113	-0.12545	1.63655e-163
POU3F1_MA0786.1	POU3F1	MA0786.1	C_POU1F1	91471	0.05436	19419	0.05886	22200	-0.12709	3.5126e-154
POU3F2_MA0787.1	POU3F2	MA0787.1	C_POU1F1	85615	0.05677	19025	0.0612	21599	-0.1201	2.76344e-156
POU3F3_MA0788.1	POU3F3	MA0788.1	C_POU1F1	86776	0.05501	17751	0.05909	20203	-0.12903	2.65199e-157
POU3F4_MA0789.1	POU3F4	MA0789.1	C_POU1F1	76672	0.06045	19170	0.06542	21915	-0.12796	8.30674e-158
POU4F1_MA0790.1	POU4F1	MA0790.1	C_POU4F2	75292	0.04939	14655	0.05353	16789	-0.12075	1.66954e-151
POU4F3_MA0791.1	POU4F3	MA0791.1	C_POU4F2	70925	0.05097	14009	0.05496	16030	-0.11784	5.92974e-153
POU5F1B_MA0792.1	POU5F1B	MA0792.1	C_POU1F1	77404	0.06043	19093	0.06546	21606	-0.12175	6.1454e-152
POU6F2_MA0793.1	POU6F2	MA0793.1	C_POU6F2	55156	0.06773	16319	0.07002	17768	-0.05377	9.14482e-115
PROX1_MA0794.1	PROX1	MA0794.1	C_PROX1	28434	0.08134	9731	0.08119	10282	0.00275	1.13811e-09
SMAD3_MA0795.1	SMAD3	MA0795.1	C_SMAD3	28576	0.08044	10998	0.0819	11710	-0.01711	3.3024e-52
TGIF1_MA0796.1	TGIF1	MA0796.1	C_TGIF2LX	73366	0.07013	24852	0.07337	26979	-0.03551	3.77407e-99
TGIF2_MA0797.1	TGIF2	MA0797.1	C_TGIF2LX	71498	0.0718	24686	0.07468	26652	-0.02554	7.65815e-84
RFX3_MA0798.3	RFX3	MA0798.3	C_RFX3	43601	0.09157	16476	0.09223	17424	0.00013	0.82026
RFX4_MA0799.2	RFX4	MA0799.2	C_RFX4	31636	0.09661	13122	0.09308	13187	0.10035	3.89374e-126
EOMES_MA0800.1	EOMES	MA0800.1	C_TBX18	67986	0.06154	20688	0.06444	22862	-0.05913	1.08645e-116
MGA_MA0801.1	MGA	MA0801.1	C_TBX4	59332	0.06863	20386	0.07017	22049	-0.02026	3.85381e-72
TBR1_MA0802.1	TBR1	MA0802.1	C_TBX18	70428	0.05989	21123	0.06287	23357	-0.05958	1.92819e-122
TBX15_MA0803.1	TBX15	MA0803.1	C_TBX4	86385	0.06456	28286	0.06606	30516	-0.01236	4.05843e-58
TBX19_MA0804.1	TBX19	MA0804.1	C_TBXT	34052	0.06224	10738	0.06585	11959	-0.07484	5.92553e-114
TBX1_MA0805.1	TBX1	MA0805.1	C_TBX4	65925	0.06373	21614	0.06614	23530	-0.03337	2.08764e-92
TBX4_MA0806.1	TBX4	MA0806.1	C_TBX4	65925	0.06373	21614	0.06614	23530	-0.03338	2.02877e-92
TBX5_MA0807.1	TBX5	MA0807.1	C_TBX4	88088	0.06269	28681	0.06501	31523	-0.03553	1.10559e-105
TEAD3_MA0808.1	TEAD3	MA0808.1	C_TEAD4	61385	0.07261	20682	0.07636	22723	-0.06472	7.15612e-123
TEAD4_MA0809.2	TEAD4	MA0809.2	C_TEAD4	96624	0.07052	32280	0.07394	35011	-0.04826	1.40181e-121
TFAP2A_MA0810.1	TFAP2A	MA0810.1	C_TFAP2A	99966	0.1076	46552	0.09167	42088	0.35247	1.10315e-207
TFAP2B_MA0811.1	TFAP2B	MA0811.1	C_TFAP2A	83727	0.10193	37255	0.08946	34689	0.28718	2.32692e-196
TFAP2B_MA0812.1	TFAP2B	MA0812.1	C_TFAP2C	78534	0.10217	35390	0.08861	32289	0.31434	1.00598e-192
TFAP2B_MA0813.1	TFAP2B	MA0813.1	C_TFAP2A	73718	0.11027	34505	0.09603	32051	0.29755	3.21248e-190
TFAP2C_MA0814.2	TFAP2C	MA0814.2	C_TFAP2C	145845	0.10546	67618	0.09089	61956	0.3213	6.8014e-209
TFAP2C_MA0815.1	TFAP2C	MA0815.1	C_TFAP2A	65909	0.11244	31170	0.0966	28554	0.33223	7.01425e-192
Ascl2_MA0816.1	Ascl2	MA0816.1	C_Tcf12	140925	0.0889	55868	0.09211	57320	0.03343	2.74328e-113
BHLHE23_MA0817.1	BHLHE23	MA0817.1	C_ATOH7	34336	0.05026	8435	0.05466	9931	-0.13475	1.12743e-140
BHLHE22_MA0818.2	BHLHE22	MA0818.2	C_ATOH7	27475	0.05137	6970	0.05591	8187	-0.12841	3.95881e-136
CLOCK_MA0819.2	CLOCK	MA0819.2	C_MYC	43019	0.07713	15900	0.07822	17144	-0.00081	0.957243
FIGLA_MA0820.1	FIGLA	MA0820.1	C_Rbpjl	104134	0.06668	34985	0.07075	38226	-0.03662	5.43971e-108
HES5_MA0821.2	HES5	MA0821.2	C_MYC	27611	0.09796	11955	0.08888	11788	0.19963	1.27636e-149
HES7_MA0822.1	HES7	MA0822.1	C_HES7	31562	0.08962	12846	0.08528	12896	0.12119	1.88612e-138
HEY1_MA0823.1	HEY1	MA0823.1	C_MYC	31945	0.1015	13822	0.0954	14010	0.12966	3.43779e-133
MNT_MA0825.1	MNT	MA0825.1	C_MYC	33056	0.09777	13948	0.09599	14575	0.04649	2.73031e-96
OLIG1_MA0826.1	OLIG1	MA0826.1	C_ATOH7	31756	0.05206	8140	0.05704	9575	-0.13639	1.08699e-135
OLIG3_MA0827.1	OLIG3	MA0827.1	C_ATOH7	39158	0.05189	9677	0.05666	11377	-0.1287	6.226e-140
SREBF2_MA0828.2	SREBF2	MA0828.2	C_SREBF2	17845	0.10707	7217	0.10759	7739	-0.02081	3.49742e-49
SREBF1_MA0829.2	SREBF1	MA0829.2	C_SREBF2	42239	0.0819	14928	0.08337	16141	-0.02329	3.6052e-66
TCF4_MA0830.2	TCF4	MA0830.2	C_ASCL1	145256	0.07731	53433	0.07555	54033	0.10365	2.78018e-156
TFE3_MA0831.3	TFE3	MA0831.3	C_BHLHE41	28649	0.11571	12719	0.11454	13336	0.02172	6.94367e-63
Tcf21_MA0832.1	Tcf21	MA0832.1	C_Tcf21	72413	0.08554	27654	0.09019	29300	-0.02778	1.28312e-83
ATF4_MA0833.2	ATF4	MA0833.2	C_CEBPG	52724	0.06709	15155	0.07048	16719	-0.07471	2.22266e-123
ATF7_MA0834.1	ATF7	MA0834.1	C_FOSL1::JUN	21735	0.12547	9134	0.12564	9781	-0.03256	1.60846e-69
BATF3_MA0835.2	BATF3	MA0835.2	C_FOSL1::JUN	89725	0.06768	27415	0.06999	29813	-0.03503	1.23392e-101
CEBPD_MA0836.2	CEBPD	MA0836.2	C_CEBPB	48975	0.07069	15138	0.07382	16444	-0.06155	2.17953e-119
CEBPE_MA0837.2	CEBPE	MA0837.2	C_CEBPB	7697	0.09535	2779	0.09597	2993	-0.04289	4.26532e-61
CEBPG_MA0838.1	CEBPG	MA0838.1	C_CEBPB	14604	0.08629	5070	0.08767	5443	-0.04	1.27555e-73
CREB3L1_MA0839.1	CREB3L1	MA0839.1	C_CREB3L4	36391	0.09526	14571	0.09158	14906	0.0686	5.21501e-113
Creb5_MA0840.1	Creb5	MA0840.1	C_FOSL1::JUN	29704	0.11447	11630	0.11567	12531	-0.04825	1.76058e-92
NFE2_MA0841.1	NFE2	MA0841.1	C_NFE2	55321	0.06738	16742	0.07006	18414	-0.05114	1.14367e-108
NRL_MA0842.2	NRL	MA0842.2	C_MAFF	62171	0.07388	21182	0.07691	23002	-0.04268	1.9251e-108
TEF_MA0843.1	TEF	MA0843.1	C_NFIL3	23743	0.06639	6328	0.06943	7119	-0.09598	1.71697e-114
XBP1_MA0844.1	XBP1	MA0844.1	C_XBP1	22887	0.0997	9311	0.09644	9717	0.05358	1.66029e-89
FOXB1_MA0845.1	FOXB1	MA0845.1	C_FOXC2	100909	0.04838	21480	0.05225	24931	-0.12262	7.94972e-161
FOXC2_MA0846.1	FOXC2	MA0846.1	C_FOXC2	139737	0.05305	31405	0.05624	34574	-0.08086	3.96735e-142
FOXD2_MA0847.3	FOXD2	MA0847.3	C_FOXE1	126936	0.05642	31734	0.05944	34430	-0.06574	2.06422e-133
FOXO4_MA0848.1	FOXO4	MA0848.1	C_FOXN3	48756	0.07661	16464	0.07903	17947	-0.06191	6.6982e-109
FOXO6_MA0849.1	FOXO6	MA0849.1	C_FOXN3	48756	0.07661	16464	0.07903	17947	-0.06191	6.6982e-109
FOXP3_MA0850.1	FOXP3	MA0850.1	C_FOXN3	48756	0.07661	16464	0.07903	17947	-0.06191	6.6982e-109
Foxj3_MA0851.1	Foxj3	MA0851.1	C_FOXN3	108256	0.05933	27707	0.06244	30274	-0.07025	1.71189e-143
FOXK1_MA0852.2	FOXK1	MA0852.2	C_FOXN3	73463	0.07691	24712	0.07934	26634	-0.051	1.25476e-117
Alx4_MA0853.1	Alx4	MA0853.1	C_Alx1	29058	0.06541	7948	0.06693	8502	-0.0484	1.32699e-99
Alx1_MA0854.1	Alx1	MA0854.1	C_Alx1	30791	0.06627	8212	0.06798	8810	-0.05713	8.08534e-100
RXRB_MA0855.1	RXRB	MA0855.1	C_NR2C2	83038	0.07207	30167	0.07299	32197	-0.0006	0.00209316
RXRG_MA0856.1	RXRG	MA0856.1	C_NR2C2	80290	0.07163	28823	0.07274	30921	-0.00506	3.20965e-24
Rarb_MA0857.1	Rarb	MA0857.1	C_Nr2F6	83671	0.06783	27729	0.06973	29860	-0.02091	7.19544e-79
Rarb_MA0858.1	Rarb	MA0858.1	C_RARA	72299	0.07743	27011	0.07838	28814	0.00093	0.046095
Rarg_MA0859.1	Rarg	MA0859.1	C_Nr2F6	76262	0.06884	25690	0.07049	27519	-0.01843	1.55002e-69
Rarg_MA0860.1	Rarg	MA0860.1	C_Rarg	83063	0.08106	32631	0.0817	33997	0.02363	6.69121e-87
TP73_MA0861.1	TP73	MA0861.1	C_TP73	45496	0.07486	15878	0.07506	17228	-0.00428	1.59736e-17
GMEB2_MA0862.1	GMEB2	MA0862.1	C_GMEB2	5727	0.10296	2114	0.10504	2370	-0.08912	8.4435e-86
MTF1_MA0863.1	MTF1	MA0863.1	C_MTF1	53992	0.08989	22547	0.08805	22925	0.07239	5.57625e-124
E2F2_MA0864.2	E2F2	MA0864.2	C_ZNF417	8876	0.14341	4703	0.13551	4543	0.20911	9.92182e-132
E2F8_MA0865.2	E2F8	MA0865.2	C_E2F8	22589	0.13119	10986	0.1134	10138	0.30681	1.84475e-170
SOX21_MA0866.1	SOX21	MA0866.1	C_SOX21	66946	0.06912	19601	0.07315	21540	-0.07435	1.04272e-125
SOX4_MA0867.2	SOX4	MA0867.2	C_SOX4	120443	0.10571	46388	0.10851	48186	-0.00926	1.82155e-59
SOX8_MA0868.2	SOX8	MA0868.2	C_Sox17	66918	0.1038	24476	0.10701	25898	-0.04444	7.73554e-112
Sox11_MA0869.2	Sox11	MA0869.2	C_SOX4	162961	0.09522	60564	0.09712	62768	0.00339	1.02905e-25
Sox1_MA0870.1	Sox1	MA0870.1	C_SOX21	54693	0.07162	16636	0.07554	18296	-0.07428	2.82886e-125
TFEC_MA0871.2	TFEC	MA0871.2	C_MYC	46085	0.10777	19892	0.10566	20764	0.04428	9.64596e-103
TFAP2A_MA0872.1	TFAP2A	MA0872.1	C_TFAP2A	69699	0.11383	33285	0.09819	30457	0.33569	1.45188e-192
HOXD12_MA0873.1	HOXD12	MA0873.1	C_HOXC10	18969	0.05658	4767	0.06031	5253	-0.09176	2.79256e-114
Arx_MA0874.1	Arx	MA0874.1	C_Alx1	27634	0.06964	7413	0.07082	7942	-0.05491	5.18105e-98
BARX1_MA0875.1	BARX1	MA0875.1	C_TLX2	38168	0.07697	12089	0.07824	12722	-0.02782	4.88845e-75
BSX_MA0876.1	BSX	MA0876.1	C_DLX6	37252	0.07879	12301	0.07965	12991	-0.0202	1.37828e-58
BARHL1_MA0877.3	BARHL1	MA0877.3	C_BARHL1	10224	0.06763	3343	0.07091	3636	-0.06947	3.01992e-87
CDX1_MA0878.3	CDX1	MA0878.3	C_HOXA10	55576	0.05764	13601	0.0613	15114	-0.09632	1.42769e-138
DLX1_MA0879.2	DLX1	MA0879.2	C_Dlx2	44156	0.07287	12969	0.07444	13751	-0.04208	1.50307e-94
Dlx3_MA0880.1	Dlx3	MA0880.1	C_DLX6	29877	0.06893	8466	0.07088	8984	-0.04411	2.45246e-90
Dlx4_MA0881.1	Dlx4	MA0881.1	C_DLX6	29877	0.06893	8466	0.07088	8984	-0.04411	2.45246e-90
DLX6_MA0882.1	DLX6	MA0882.1	C_DLX6	30346	0.07267	9123	0.07432	9665	-0.03746	4.87331e-81
Dmbx1_MA0883.1	Dmbx1	MA0883.1	C_Dmbx1	29853	0.06753	9269	0.07036	10079	-0.06081	3.77268e-104
DUXA_MA0884.2	DUXA	MA0884.2	C_DUXA	25493	0.05865	6230	0.06177	6847	-0.07859	1.3411e-111
Dlx2_MA0885.2	Dlx2	MA0885.2	C_Dlx2	47770	0.07067	13834	0.07269	14675	-0.04573	8.50632e-99
EMX2_MA0886.1	EMX2	MA0886.1	C_EMX2	25143	0.07852	7738	0.07964	8204	-0.03428	5.04123e-79
EVX1_MA0887.1	EVX1	MA0887.1	C_EVX2	26971	0.08139	8912	0.08333	9617	-0.03831	7.68614e-85
EVX2_MA0888.1	EVX2	MA0888.1	C_EVX2	27055	0.0813	9092	0.0831	9768	-0.03598	2.81593e-82
GBX1_MA0889.1	GBX1	MA0889.1	C_GBX2	27717	0.08779	9184	0.08732	9522	-0.01029	1.54686e-29
GBX2_MA0890.1	GBX2	MA0890.1	C_GBX2	34795	0.08393	11159	0.08372	11607	-0.01258	1.44987e-41
GSC2_MA0891.1	GSC2	MA0891.1	C_OTX2	44642	0.06589	14058	0.06793	15306	-0.03462	5.91237e-87
GSX1_MA0892.1	GSX1	MA0892.1	C_PAX4	41513	0.07331	12388	0.07412	13136	-0.03005	1.38469e-76
GSX2_MA0893.2	GSX2	MA0893.2	C_ESX1	39167	0.08061	13290	0.08149	14112	-0.02375	2.26096e-72
HESX1_MA0894.1	HESX1	MA0894.1	C_GBX2	32229	0.07641	9823	0.07725	10320	-0.02912	3.63505e-77
HMBOX1_MA0895.1	HMBOX1	MA0895.1	C_HMBOX1	30684	0.0691	9704	0.07153	10724	-0.06092	8.42531e-103
Hmx1_MA0896.1	Hmx1	MA0896.1	C_Hmx3	42099	0.06442	12081	0.06698	12941	-0.04952	1.12178e-100
Hmx2_MA0897.1	Hmx2	MA0897.1	C_Hmx3	50568	0.05849	12767	0.06134	13956	-0.06655	2.05985e-120
Hmx3_MA0898.1	Hmx3	MA0898.1	C_Hmx3	50845	0.0567	12534	0.05961	13650	-0.06745	5.99564e-120
HOXA10_MA0899.1	HOXA10	MA0899.1	C_HOXA10	69890	0.05157	15567	0.05506	17191	-0.09612	2.91819e-142
HOXA2_MA0900.2	HOXA2	MA0900.2	C_ESX1	16857	0.08329	5380	0.08445	5700	-0.04245	1.17787e-78
HOXB13_MA0901.2	HOXB13	MA0901.2	C_HOXB13	105184	0.04939	20179	0.05258	22540	-0.09764	7.28229e-151
HOXB2_MA0902.2	HOXB2	MA0902.2	C_ESX1	23668	0.08143	7683	0.08247	8038	-0.02757	1.94471e-70
HOXB3_MA0903.1	HOXB3	MA0903.1	C_EMX2	42195	0.07983	13718	0.081	14509	-0.02533	1.87834e-73
HOXB5_MA0904.2	HOXB5	MA0904.2	C_ESX1	16857	0.08329	5380	0.08445	5700	-0.04242	1.25922e-78
HOXC10_MA0905.1	HOXC10	MA0905.1	C_HOXC10	33468	0.05289	7756	0.05702	8640	-0.10203	4.94591e-129
HOXC12_MA0906.1	HOXC12	MA0906.1	C_HOXC10	23837	0.05602	5942	0.06001	6577	-0.09459	1.69815e-111
HOXC13_MA0907.1	HOXC13	MA0907.1	C_HOXC13	37768	0.06067	10193	0.06465	11238	-0.08506	1.15687e-123
HOXD11_MA0908.1	HOXD11	MA0908.1	C_HOXC10	23667	0.05422	5568	0.0578	6179	-0.09324	1.03583e-120
Hoxd13_MA0909.3	Hoxd13	MA0909.3	C_CDX2	67742	0.06002	16058	0.06357	17861	-0.09065	1.8571e-141
HOXD8_MA0910.2	HOXD8	MA0910.2	C_HOXB8	40531	0.06728	12220	0.07038	13399	-0.0606	5.64884e-112
Hoxa11_MA0911.1	Hoxa11	MA0911.1	C_HOXC10	21330	0.05624	5390	0.06035	5931	-0.09667	2.36457e-120
HOXD3_MA0912.2	HOXD3	MA0912.2	C_ESX1	40565	0.07094	12249	0.07291	13094	-0.04835	1.41656e-98
HOXD9_MA0913.2	HOXD9	MA0913.2	C_HOXA10	58953	0.05279	13763	0.05667	15177	-0.09233	8.12497e-133
ISL2_MA0914.1	ISL2	MA0914.1	C_ISL2	47914	0.06792	15588	0.07046	16903	-0.04312	1.14184e-100
HES1_MA1099.2	HES1	MA1099.2	C_MYC	35770	0.13288	18316	0.11002	16744	0.4021	3.15307e-186
ASCL1_MA1100.2	ASCL1	MA1100.2	C_Tcf12	109165	0.09035	44008	0.09346	44928	0.04846	6.69995e-117
BACH2_MA1101.2	BACH2	MA1101.2	C_NFE2	52782	0.06745	16208	0.07002	17805	-0.0464	8.95367e-103
CTCFL_MA1102.2	CTCFL	MA1102.2	C_CTCFL	143165	0.13064	74015	0.1158	67999	0.33035	9.21467e-205
FOXK2_MA1103.2	FOXK2	MA1103.2	C_FOXN3	73265	0.06985	22857	0.07268	24973	-0.07052	2.59616e-129
GATA6_MA1104.2	GATA6	MA1104.2	C_Gata3	59714	0.05368	15193	0.05799	17257	-0.11123	1.34885e-140
GRHL2_MA1105.2	GRHL2	MA1105.2	C_GRHL2	76105	0.06625	24364	0.06854	26198	-0.02578	8.58547e-90
HIF1A_MA1106.1	HIF1A	MA1106.1	C_ARNT::HIF1A	24332	0.09374	10132	0.09007	10445	0.09489	2.80906e-116
KLF9_MA1107.2	KLF9	MA1107.2	C_KLF9	284622	0.10024	122068	0.09185	121968	0.15463	6.9015e-186
MXI1_MA1108.2	MXI1	MA1108.2	C_MXI1	125352	0.06975	44085	0.07194	48599	-0.03244	3.58367e-104
NEUROD1_MA1109.1	NEUROD1	MA1109.1	C_Neurod2	157141	0.08263	58901	0.0862	61557	-0.00105	0.000177187
Nr1H4_MA1110.2	Nr1H4	MA1110.2	C_Nr1H2	105718	0.08111	42578	0.08173	44862	0.02123	2.11146e-84
NR2F2_MA1111.1	NR2F2	MA1111.1	C_Nr1H2	82963	0.07206	30517	0.07404	32788	-0.02177	4.06884e-80
NR4A1_MA1112.2	NR4A1	MA1112.2	C_NR4A1	104692	0.07044	33988	0.07234	36177	-0.02346	2.2216e-92
PBX2_MA1113.2	PBX2	MA1113.2	C_MEIS2	59641	0.05416	13288	0.05781	15187	-0.10416	2.19661e-142
PBX3_MA1114.1	PBX3	MA1114.1	C_PBX3	135325	0.0905	53279	0.08864	54956	0.05948	2.74344e-133
POU5F1_MA1115.1	POU5F1	MA1115.1	C_POU2F3	98310	0.05983	25047	0.06431	27931	-0.10092	4.27861e-159
RBPJ_MA1116.1	RBPJ	MA1116.1	C_RBPJ	172193	0.08144	63553	0.08095	65663	0.03852	1.24337e-125
RELB_MA1117.1	RELB	MA1117.1	C_RELB	67850	0.08412	25739	0.08269	26124	0.06025	1.5965e-121
SIX1_MA1118.1	SIX1	MA1118.1	C_SIX1	62195	0.06489	18952	0.06751	20813	-0.06118	4.99674e-124
SIX2_MA1119.1	SIX2	MA1119.1	C_SIX2	80740	0.06612	25701	0.06857	27990	-0.04239	1.4693e-104
SOX13_MA1120.1	SOX13	MA1120.1	C_SOX13	72879	0.10798	28701	0.11082	30261	-0.02907	9.68457e-98
TEAD2_MA1121.1	TEAD2	MA1121.1	C_TEAD4	83114	0.07509	28942	0.07789	31386	-0.03704	6.43921e-103
TFDP1_MA1122.1	TFDP1	MA1122.1	C_E2F6	63921	0.14734	34266	0.11886	29902	0.50562	1.10348e-208
TWIST1_MA1123.2	TWIST1	MA1123.2	C_TWIST1	127669	0.07556	45918	0.07998	49152	-0.03602	5.72211e-106
ZNF24_MA1124.1	ZNF24	MA1124.1	C_ZNF24	82360	0.06775	24446	0.07119	26669	-0.06411	3.9426e-134
ZNF384_MA1125.1	ZNF384	MA1125.1	C_ZNF384	219828	0.04759	43448	0.05049	46676	-0.06822	6.16568e-151
FOSJUN_MA1126.1	FOS::JUN	MA1126.1	C_FOSL1::JUN	36136	0.10542	14076	0.10677	15115	-0.03015	5.58109e-82
FOSBJUN_MA1127.1	FOSB::JUN	MA1127.1	C_FOSL1::JUN	30570	0.11696	12337	0.11755	13258	-0.03367	5.80376e-78
FOSL1JUN_MA1128.1	FOSL1::JUN	MA1128.1	C_FOSL1::JUN	77799	0.07035	24301	0.0723	26302	-0.02805	5.49107e-89
FOSL1JUN_MA1129.1	FOSL1::JUN	MA1129.1	C_FOSL1::JUN	20385	0.12376	8371	0.12508	8995	-0.04726	3.03008e-81
FOSL2JUN_MA1130.1	FOSL2::JUN	MA1130.1	C_FOSL1::JUN	70253	0.07049	21888	0.07247	23659	-0.02587	4.64897e-88
FOSL2JUN_MA1131.1	FOSL2::JUN	MA1131.1	C_FOSL1::JUN	36698	0.11272	14802	0.11347	15836	-0.03629	1.04005e-83
JUNJUNB_MA1132.1	JUN::JUNB	MA1132.1	C_FOSL1::JUN	60867	0.07215	18843	0.0737	20427	-0.03433	3.13889e-93
JUNJUNB_MA1133.1	JUN::JUNB	MA1133.1	C_FOSL1::JUN	33837	0.11333	14007	0.11304	14949	-0.01537	7.30121e-52
FOSJUNB_MA1134.1	FOS::JUNB	MA1134.1	C_FOSL1::JUN	65549	0.0691	20082	0.07135	21855	-0.03253	1.61124e-92
FOSBJUNB_MA1135.1	FOSB::JUNB	MA1135.1	C_FOSL1::JUN	68463	0.06869	20946	0.07102	22813	-0.03262	1.76192e-96
FOSBJUNB_MA1136.1	FOSB::JUNB	MA1136.1	C_FOSL1::JUN	22689	0.1209	9220	0.12163	9901	-0.04244	8.40531e-83
FOSL1JUNB_MA1137.1	FOSL1::JUNB	MA1137.1	C_FOSL1::JUN	70272	0.06956	21759	0.07172	23626	-0.03017	1.04073e-85
FOSL2JUNB_MA1138.1	FOSL2::JUNB	MA1138.1	C_FOSL1::JUN	66573	0.0672	19743	0.06965	21597	-0.04005	1.60836e-106
FOSL2JUNB_MA1139.1	FOSL2::JUNB	MA1139.1	C_FOSL1::JUN	23260	0.12062	9577	0.12193	10309	-0.03998	2.62915e-74
JUNB_MA1140.2	JUNB	MA1140.2	C_FOSL1::JUN	23022	0.13185	9970	0.1309	10585	-0.01305	4.47834e-35
FOSJUND_MA1141.1	FOS::JUND	MA1141.1	C_FOSL1::JUN	77052	0.07104	24304	0.07293	26200	-0.02496	9.89284e-83
FOSL1JUND_MA1142.1	FOSL1::JUND	MA1142.1	C_FOSL1::JUN	70965	0.06904	21416	0.07125	23284	-0.0362	6.67752e-102
FOSL1JUND_MA1143.1	FOSL1::JUND	MA1143.1	C_FOSL1::JUND	26499	0.11197	10030	0.11184	10870	-0.04413	3.52747e-84
FOSL2JUND_MA1144.1	FOSL2::JUND	MA1144.1	C_FOSL1::JUN	66554	0.06888	20286	0.07106	22071	-0.0331	3.83007e-96
FOSL2JUND_MA1145.1	FOSL2::JUND	MA1145.1	C_FOSL1::JUN	33139	0.11976	13709	0.11972	14670	-0.02489	1.32747e-71
NR1H4RXRA_MA1146.1	NR1H4::RXRA	MA1146.1	C_NR2F1	41851	0.08685	16643	0.086	17195	0.04727	2.44123e-99
NR4A2RXRA_MA1147.1	NR4A2::RXRA	MA1147.1	C_NR2F1	39773	0.08865	16264	0.08627	16561	0.08314	2.4243e-123
PPARARXRA_MA1148.1	PPARA::RXRA	MA1148.1	C_PPARA::RXRA	87981	0.0757	32738	0.07614	34541	0.00678	9.53803e-39
RARARXRG_MA1149.1	RARA::RXRG	MA1149.1	C_RARA::RXRG	85824	0.09134	36496	0.08675	36793	0.12139	6.10765e-159
RORB_MA1150.1	RORB	MA1150.1	C_RORB	58594	0.0776	21353	0.07856	22782	-0.0171	9.29044e-63
RORC_MA1151.1	RORC	MA1151.1	C_RORB	56594	0.07722	20289	0.07729	21536	-0.00506	7.55614e-19
SOX15_MA1152.1	SOX15	MA1152.1	C_SOX15	128247	0.08364	39914	0.0869	42129	-0.04414	2.05739e-124
Smad4_MA1153.1	Smad4	MA1153.1	C_Smad4	59911	0.08091	23107	0.08192	24209	0.02027	1.37835e-75
ZNF282_MA1154.1	ZNF282	MA1154.1	C_ZNF282	77327	0.07983	28501	0.07996	29854	0.01633	3.19314e-71
ZSCAN4_MA1155.1	ZSCAN4	MA1155.1	C_ZSCAN4	160202	0.06881	56881	0.07148	62334	-0.03684	5.75151e-120
IRF3_MA1418.1	IRF3	MA1418.1	C_IRF3	107879	0.06819	32971	0.06967	34657	-0.02058	4.60283e-89
IRF4_MA1419.1	IRF4	MA1419.1	C_Irf1	44223	0.07114	14048	0.07328	14954	-0.03318	1.94226e-85
IRF5_MA1420.1	IRF5	MA1420.1	C_IRF5	40455	0.07451	13637	0.0753	14417	-0.00743	6.36034e-25
TCF7L1_MA1421.1	TCF7L1	MA1421.1	C_TCF7L1	102856	0.06664	31932	0.0689	34133	-0.03742	1.35719e-106
ARGFX_MA1463.1	ARGFX	MA1463.1	C_ARGFX	40670	0.05806	9537	0.06017	10314	-0.06572	2.1918e-114
ARNT2_MA1464.1	ARNT2	MA1464.1	C_MYC	28469	0.1084	12482	0.10557	12959	0.05378	6.47327e-97
ATF6_MA1466.1	ATF6	MA1466.1	C_CREB3L4	34454	0.09427	13880	0.09072	14258	0.07002	1.79435e-112
Atoh1_MA1467.2	Atoh1	MA1467.2	C_Neurod2	132849	0.07551	46308	0.0799	49494	-0.03026	3.21938e-102
ATOH7_MA1468.1	ATOH7	MA1468.1	C_ATOH7	68916	0.06231	20768	0.06669	22996	-0.07485	1.1969e-129
BACH2_MA1470.1	BACH2	MA1470.1	C_BACH2	26897	0.08602	8685	0.08964	9695	-0.08437	5.71395e-122
BARX2_MA1471.1	BARX2	MA1471.1	C_BARX2	52559	0.05548	11084	0.05853	12462	-0.09946	1.23085e-133
Bhlha15_MA1472.2	Bhlha15	MA1472.2	C_Tcf12	107718	0.09791	46137	0.10142	47231	0.03055	2.78072e-104
CDX4_MA1473.1	CDX4	MA1473.1	C_HOXA10	58677	0.05406	13819	0.05789	15342	-0.09836	5.57393e-135
CREB3L4_MA1474.1	CREB3L4	MA1474.1	C_CREB3L4	32740	0.11683	14545	0.1067	14508	0.15782	6.17936e-143
CREB3L4_MA1475.1	CREB3L4	MA1475.1	C_FOSL1::JUN	17585	0.15209	8425	0.14471	8775	0.06154	4.09655e-89
Dlx5_MA1476.2	Dlx5	MA1476.2	C_Dlx2	46897	0.06925	13421	0.07146	14281	-0.05031	2.3648e-101
DMRTA2_MA1478.1	DMRTA2	MA1478.1	C_DMRTA1	48039	0.06086	12814	0.06491	14389	-0.09934	2.27525e-137
DMRTC2_MA1479.1	DMRTC2	MA1479.1	C_DMRTA1	54735	0.05827	13918	0.06193	15620	-0.10086	2.75858e-138
DPRX_MA1480.1	DPRX	MA1480.1	C_DPRX	31917	0.06914	10431	0.07216	11354	-0.05395	1.09868e-95
DRGX_MA1481.1	DRGX	MA1481.1	C_ESX1	25080	0.08956	8271	0.08946	8641	-0.01976	3.42979e-53
ELF2_MA1483.2	ELF2	MA1483.2	C_Erg	54434	0.12098	24243	0.11243	24357	0.12295	3.62991e-150
ETS2_MA1484.1	ETS2	MA1484.1	C_ETS1	46869	0.13245	22245	0.11999	21992	0.18389	1.69219e-157
FERD3L_MA1485.1	FERD3L	MA1485.1	C_FERD3L	81447	0.08916	32852	0.08872	33130	0.08304	4.78585e-139
FOXE1_MA1487.2	FOXE1	MA1487.2	C_FOXE1	141090	0.05796	35907	0.06102	38946	-0.06392	4.37025e-141
FOXN3_MA1489.1	FOXN3	MA1489.1	C_FOXN3	12965	0.07883	4281	0.08156	4584	-0.0465	6.03169e-77
GLI3_MA1491.2	GLI3	MA1491.2	C_GLI3	77898	0.08625	31185	0.08275	31761	0.10574	9.75625e-149
HES6_MA1493.1	HES6	MA1493.1	C_HES6	39775	0.08515	15688	0.08462	16496	0.02515	1.94279e-70
HNF4A_MA1494.1	HNF4A	MA1494.1	C_HNF4A	64811	0.07704	23606	0.07767	24982	0.00504	1.52e-24
HOXA1_MA1495.1	HOXA1	MA1495.1	C_ESX1	16857	0.08329	5380	0.08445	5700	-0.04242	1.25922e-78
HOXA4_MA1496.1	HOXA4	MA1496.1	C_HOXD4	39596	0.06623	12193	0.06959	13432	-0.07227	4.09986e-120
HOXA6_MA1497.1	HOXA6	MA1497.1	C_HOXB7	32532	0.07371	9985	0.07658	10836	-0.05664	8.32447e-105
HOXA7_MA1498.2	HOXA7	MA1498.2	C_HOXB8	38051	0.06647	11416	0.06937	12439	-0.05419	1.9701e-104
HOXB4_MA1499.1	HOXB4	MA1499.1	C_HOXD4	39871	0.05837	10622	0.06173	11806	-0.08286	1.21874e-120
HOXB6_MA1500.1	HOXB6	MA1500.1	C_HOXB6	38165	0.06123	10541	0.06412	11336	-0.05593	1.76814e-105
HOXB7_MA1501.1	HOXB7	MA1501.1	C_HOXB7	33530	0.07228	10474	0.07476	11185	-0.04543	5.25051e-91
HOXB8_MA1502.1	HOXB8	MA1502.1	C_HOXB8	40531	0.06728	12220	0.07038	13399	-0.06062	5.46919e-112
HOXB9_MA1503.1	HOXB9	MA1503.1	C_HOXC10	25309	0.05359	6036	0.05777	6716	-0.1008	1.16383e-117
HOXC4_MA1504.1	HOXC4	MA1504.1	C_HOXD4	38332	0.06883	11912	0.07124	13064	-0.05863	1.71338e-108
HOXC8_MA1505.1	HOXC8	MA1505.1	C_LHX5	23488	0.06197	6333	0.06519	6963	-0.07755	8.28967e-107
HOXD10_MA1506.1	HOXD10	MA1506.1	C_HOXC10	24924	0.05645	6167	0.06044	6862	-0.09578	1.43882e-120
HOXD4_MA1507.1	HOXD4	MA1507.1	C_HOXD4	34694	0.06575	10280	0.06879	11262	-0.06932	4.57104e-118
IKZF1_MA1508.1	IKZF1	MA1508.1	C_IKZF1	211021	0.07823	76786	0.07735	78811	0.0382	1.2732e-127
IRF6_MA1509.1	IRF6	MA1509.1	C_IRF6	13396	0.08138	4933	0.08074	5137	0.03804	5.28429e-68
KLF10_MA1511.2	KLF10	MA1511.2	C_KLF4	231095	0.1368	113869	0.11699	107727	0.29975	9.82055e-213
KLF11_MA1512.1	KLF11	MA1512.1	C_KLF9	179340	0.1327	84443	0.11554	82291	0.23673	4.68284e-204
KLF15_MA1513.1	KLF15	MA1513.1	C_PATZ1	164551	0.16379	92278	0.12923	80516	0.54612	2.45024e-228
KLF17_MA1514.1	KLF17	MA1514.1	C_KLF17	183720	0.097	78722	0.09044	77867	0.15388	4.42124e-185
KLF2_MA1515.1	KLF2	MA1515.1	C_KLF9	173192	0.13439	83218	0.11481	79468	0.28308	1.85547e-210
KLF3_MA1516.1	KLF3	MA1516.1	C_KLF3	97950	0.14242	48720	0.11869	45582	0.34607	5.98201e-204
KLF6_MA1517.1	KLF6	MA1517.1	C_KLF9	135845	0.13079	64097	0.11325	62336	0.24571	2.17337e-197
Lhx1_MA1518.2	Lhx1	MA1518.2	C_Lhx1	24830	0.08023	7990	0.08182	8513	-0.03507	9.2443e-75
LHX5_MA1519.1	LHX5	MA1519.1	C_LHX5	39682	0.06192	10665	0.06456	11526	-0.06035	1.10175e-107
MAF_MA1520.1	MAF	MA1520.1	C_MAFA	56189	0.08263	21699	0.08296	22518	0.03762	5.7579e-100
MAFA_MA1521.1	MAFA	MA1521.1	C_MAFA	58214	0.08766	23441	0.08587	23781	0.0882	7.56901e-135
MAZ_MA1522.1	MAZ	MA1522.1	C_PATZ1	231706	0.12529	112914	0.10839	106523	0.287	8.74308e-214
MSANTD3_MA1523.1	MSANTD3	MA1523.1	C_MSANTD3	87917	0.08117	34928	0.0812	36919	0.02325	8.28416e-78
Msgn1_MA1524.2	Msgn1	MA1524.2	C_Msgn1	107178	0.07409	35575	0.07659	37790	-0.02303	5.61846e-90
NFATC4_MA1525.2	NFATC4	MA1525.2	C_Nfatc2	78089	0.06491	22053	0.06729	23879	-0.0548	4.43275e-122
NFIC_MA1527.1	NFIC	MA1527.1	C_NFIB	84759	0.1052	39765	0.10478	39913	0.08411	1.2439e-136
NFIX_MA1528.1	NFIX	MA1528.1	C_NFIB	99730	0.10867	48248	0.10599	47509	0.13518	2.84635e-163
NHLH2_MA1529.1	NHLH2	MA1529.1	C_NHLH2	98966	0.09429	41789	0.09105	40993	0.14885	1.1717e-161
NKX6-3_MA1530.1	NKX6-3	MA1530.1	C_NKX6-3	51036	0.06215	14061	0.06574	15593	-0.08299	1.12722e-129
NR1D1_MA1531.1	NR1D1	MA1531.1	C_NR1D1	72368	0.08913	30391	0.08807	31416	0.05791	3.785e-120
NR1D2_MA1532.2	NR1D2	MA1532.2	C_NR1D1	71645	0.08129	27709	0.08184	29310	0.01521	1.40076e-61
NR1I2_MA1533.1	NR1I2	MA1533.1	C_NR1I2	51419	0.08752	21646	0.08411	21905	0.10829	2.3194e-141
NR1I3_MA1534.1	NR1I3	MA1534.1	C_Vdr	60894	0.06318	18631	0.0659	20319	-0.05	1.11566e-111
NR2C1_MA1535.1	NR2C1	MA1535.1	C_NR2C2	91279	0.08471	37667	0.08413	39375	0.03987	1.55267e-105
NR2C2_MA1536.1	NR2C2	MA1536.1	C_NR2C2	62621	0.08403	25494	0.08417	26713	0.02263	1.39325e-76
NR2F1_MA1537.1	NR2F1	MA1537.1	C_NR2C2	88748	0.07873	34239	0.07825	35893	0.03353	2.93938e-100
NR2F1_MA1538.1	NR2F1	MA1538.1	C_NR2F1	43219	0.08793	17632	0.08625	18046	0.07177	3.78943e-115
NR2F6_MA1539.1	NR2F6	MA1539.1	C_NR2F1	39067	0.08613	15944	0.08454	16337	0.07205	5.32076e-121
NR5A1_MA1540.2	NR5A1	MA1540.2	C_NR5A1	155207	0.07087	57981	0.07152	61064	0.02034	3.70253e-91
NR6A1_MA1541.1	NR6A1	MA1541.1	C_NR6A1	84490	0.07008	30151	0.07088	32109	0.0053	5.88812e-26
OSR1_MA1542.1	OSR1	MA1542.1	C_OSR1	57566	0.08431	22098	0.08497	23183	0.01573	1.34399e-58
OVOL1_MA1544.1	OVOL1	MA1544.1	C_OVOL1	8393	0.08873	3078	0.08969	3324	-0.03864	5.33318e-59
OVOL2_MA1545.1	OVOL2	MA1545.1	C_OVOL1	7862	0.0905	3069	0.09003	3267	0.00692	0.000113178
PAX3_MA1546.1	PAX3	MA1546.1	C_PAX3	20771	0.08495	7375	0.08594	7928	-0.01646	4.76874e-48
PITX2_MA1547.2	PITX2	MA1547.2	C_OTX2	56079	0.06242	17117	0.06482	18723	-0.04676	1.31501e-101
PLAGL2_MA1548.1	PLAGL2	MA1548.1	C_PLAGL2	57062	0.10637	26742	0.0926	24293	0.32895	6.44106e-187
POU6F1_MA1549.1	POU6F1	MA1549.1	C_POU6F2	55547	0.06793	16693	0.07058	18311	-0.06286	6.21471e-114
PPARD_MA1550.1	PPARD	MA1550.1	C_NR2C2	83013	0.07269	30091	0.07353	32099	0.00067	0.346425
RARB_MA1552.1	RARB	MA1552.1	C_RXRG	34720	0.08894	13561	0.0859	13941	0.06051	3.27131e-108
RARG_MA1553.1	RARG	MA1553.1	C_RXRG	34030	0.08379	12762	0.08248	13346	0.02932	2.63808e-73
RFX7_MA1554.1	RFX7	MA1554.1	C_RFX7	43092	0.08409	15748	0.0846	16512	0.02218	1.20182e-66
RXRB_MA1555.1	RXRB	MA1555.1	C_RXRG	36967	0.0879	14794	0.08451	15159	0.07414	5.6015e-118
RXRG_MA1556.1	RXRG	MA1556.1	C_RXRG	45709	0.09215	18777	0.0878	19139	0.08277	2.22584e-126
SMAD5_MA1557.1	SMAD5	MA1557.1	C_SMAD3	22757	0.08889	9198	0.08956	9725	0.00408	8.37205e-07
SNAI1_MA1558.1	SNAI1	MA1558.1	C_ASCL1	116244	0.06083	37616	0.06378	40792	-0.00817	1.13157e-46
SNAI3_MA1559.1	SNAI3	MA1559.1	C_ASCL1	116371	0.06119	37787	0.06425	41071	-0.0145	1.53119e-76
SOHLH2_MA1560.1	SOHLH2	MA1560.1	C_MYC	26374	0.10547	11346	0.09764	11624	0.12514	3.43673e-133
SOX12_MA1561.1	SOX12	MA1561.1	C_SOX12	35271	0.09185	12625	0.094	13352	-0.02696	1.57543e-69
SOX14_MA1562.1	SOX14	MA1562.1	C_SOX14	38048	0.10176	13861	0.1047	14758	-0.04539	3.13632e-96
SOX18_MA1563.2	SOX18	MA1563.2	C_SOX18	44777	0.09079	15183	0.0949	16371	-0.06939	6.61473e-118
SP9_MA1564.1	SP9	MA1564.1	C_KLF9	188822	0.1472	93577	0.12563	89345	0.29166	2.51058e-211
TBX18_MA1565.1	TBX18	MA1565.1	C_TBX18	107977	0.07088	37085	0.07123	39389	0.01167	2.33183e-59
TBX3_MA1566.2	TBX3	MA1566.2	C_TBX18	67018	0.06374	21495	0.06603	23502	-0.03683	8.02441e-100
Tbx6_MA1567.2	Tbx6	MA1567.2	C_TBX18	105976	0.07014	36299	0.0714	39008	-0.00653	3.04816e-34
TCF21_MA1568.1	TCF21	MA1568.1	C_ATOH7	47684	0.06788	15208	0.07219	16696	-0.06398	3.61769e-117
TFAP2E_MA1569.1	TFAP2E	MA1569.1	C_TFAP2C	69192	0.10677	32453	0.08956	28654	0.39063	1.8536e-197
TFAP4_MA1570.1	TFAP4	MA1570.1	C_TFAP4	46394	0.06131	13398	0.06508	15121	-0.08521	6.11337e-126
TGIF2LX_MA1571.1	TGIF2LX	MA1571.1	C_TGIF2LX	51114	0.0771	18454	0.0796	19839	-0.01006	2.43245e-34
TGIF2LY_MA1572.1	TGIF2LY	MA1572.1	C_TGIF2LX	47935	0.07523	17013	0.07789	18373	-0.01648	1.52135e-60
Thap11_MA1573.2	Thap11	MA1573.2	C_Thap11	89827	0.09702	33466	0.09512	35001	0.0309	1.06366e-96
THRB_MA1574.1	THRB	MA1574.1	C_NR2C2	85787	0.08079	33636	0.07938	34986	0.04573	2.2164e-112
THRB_MA1575.1	THRB	MA1575.1	C_THRB	42936	0.09216	18223	0.08769	18194	0.13198	4.01064e-144
THRB_MA1576.1	THRB	MA1576.1	C_THRB	93506	0.07957	36003	0.07926	37432	0.04064	5.20781e-108
TLX2_MA1577.1	TLX2	MA1577.1	C_TLX2	25127	0.08475	8111	0.08443	8421	-0.01821	4.10952e-47
VEZF1_MA1578.1	VEZF1	MA1578.1	C_ZNF740	91745	0.09439	38970	0.08883	38205	0.14823	1.09283e-166
ZBTB26_MA1579.1	ZBTB26	MA1579.1	C_ZBTB26	140403	0.07617	50286	0.07679	52513	0.0193	1.62614e-91
ZBTB32_MA1580.1	ZBTB32	MA1580.1	C_ZBTB32	62621	0.06604	21020	0.0717	23918	-0.10856	5.10231e-144
ZBTB6_MA1581.1	ZBTB6	MA1581.1	C_ZBTB6	120712	0.09254	50744	0.08703	50098	0.15502	7.20215e-176
ZFP57_MA1583.1	ZFP57	MA1583.1	C_ZFP57	19795	0.11918	9578	0.09883	8364	0.4443	8.04259e-183
ZIC5_MA1584.1	ZIC5	MA1584.1	C_ZIC5	101963	0.11483	50102	0.10015	46024	0.3312	7.72522e-204
ZKSCAN1_MA1585.1	ZKSCAN1	MA1585.1	C_ZKSCAN1	50080	0.08643	19132	0.08767	20783	-0.02423	4.23967e-78
ZNF135_MA1587.1	ZNF135	MA1587.1	C_ZNF135	138398	0.08361	55181	0.07859	55276	0.12883	1.32675e-167
ZNF136_MA1588.1	ZNF136	MA1588.1	C_ZNF136	71739	0.06874	22776	0.07119	24460	-0.04025	3.2817e-103
ZNF140_MA1589.1	ZNF140	MA1589.1	C_ZNF140	78908	0.08601	30096	0.08478	31035	0.03758	2.23268e-103
ZNF274_MA1592.1	ZNF274	MA1592.1	C_ZNF274	79310	0.075	28217	0.07572	29892	0.00218	4.35943e-07
ZNF317_MA1593.1	ZNF317	MA1593.1	C_ZNF317	138140	0.08041	51468	0.08224	54077	0.00467	6.06039e-37
ZNF382_MA1594.1	ZNF382	MA1594.1	C_ZNF382	70250	0.07825	24934	0.07921	26610	-0.00846	5.22577e-41
ZNF460_MA1596.1	ZNF460	MA1596.1	C_ZNF460	269070	0.10472	121884	0.09088	113520	0.29342	8.58357e-219
ZNF528_MA1597.1	ZNF528	MA1597.1	C_ZNF528	129954	0.08186	48935	0.081	49942	0.05731	1.94766e-133
ZNF682_MA1599.1	ZNF682	MA1599.1	C_ZNF682	124919	0.11985	58785	0.10555	56021	0.25453	4.10768e-194
ZNF684_MA1600.1	ZNF684	MA1600.1	C_ZNF684	114402	0.0936	47497	0.09106	48818	0.07024	2.21564e-138
ZNF75D_MA1601.2	ZNF75D	MA1601.2	C_ZNF75D	111434	0.07848	40734	0.07878	42655	0.0216	7.58074e-91
ZSCAN29_MA1602.1	ZSCAN29	MA1602.1	C_ZSCAN29	45408	0.07867	18178	0.07937	19279	0.01727	1.87056e-61
Dmrt1_MA1603.1	Dmrt1	MA1603.1	C_Dmrt1	70733	0.06388	21235	0.06727	23708	-0.07566	1.87731e-132
Ebf2_MA1604.1	Ebf2	MA1604.1	C_EBF1	124706	0.08645	50490	0.08235	49838	0.13107	9.27457e-171
Foxf1_MA1606.1	Foxf1	MA1606.1	C_FOXN3	83527	0.06681	24664	0.06992	27121	-0.07988	1.04208e-135
Foxl2_MA1607.1	Foxl2	MA1607.1	C_FOXN3	92410	0.05946	24472	0.063	27396	-0.09514	1.41585e-145
Isl1_MA1608.1	Isl1	MA1608.1	C_Isl1	41087	0.07342	13725	0.07638	14824	-0.05178	1.56779e-99
Plagl1_MA1615.1	Plagl1	MA1615.1	C_Plagl1	160460	0.10403	73677	0.09385	69724	0.24124	1.57026e-199
Prdm15_MA1616.1	Prdm15	MA1616.1	C_Prdm15	117157	0.07583	41162	0.07565	42881	0.02601	6.63196e-94
Ptf1a_MA1618.1	Ptf1a	MA1618.1	C_Neurod2	134246	0.07415	46898	0.07938	50693	-0.05035	9.98809e-129
Ptf1A_MA1619.1	Ptf1A	MA1619.1	C_Tcf12	105761	0.09763	45161	0.10104	46274	0.03012	6.69625e-103
Ptf1A_MA1620.1	Ptf1A	MA1620.1	C_Rbpjl	115189	0.06392	38333	0.06735	41644	-0.01899	1.05965e-84
Rbpjl_MA1621.1	Rbpjl	MA1621.1	C_Rbpjl	125659	0.064	41759	0.06685	44887	0.00085	1.25077e-05
Stat2_MA1623.1	Stat2	MA1623.1	C_Stat2	252407	0.0601	67701	0.06249	71979	-0.04296	1.91557e-134
Stat5a_MA1624.1	Stat5a	MA1624.1	C_Stat5a	105403	0.07205	34232	0.07338	35963	-0.01054	1.41777e-59
Stat5b_MA1625.1	Stat5b	MA1625.1	C_Stat5b	135389	0.07745	46394	0.07815	48695	0.00285	1.51672e-17
Wt1_MA1627.1	Wt1	MA1627.1	C_Wt1	272137	0.10465	119043	0.09411	114439	0.21223	1.25099e-204
Zic1Zic2_MA1628.1	Zic1::Zic2	MA1628.1	C_Zic2	144595	0.09566	62056	0.08924	60270	0.18453	2.5905e-187
Zic2_MA1629.1	Zic2	MA1629.1	C_Zic2	209290	0.09001	86885	0.0871	87231	0.114	3.37926e-170
ZNF281_MA1630.2	ZNF281	MA1630.2	C_PATZ1	350432	0.11273	159311	0.10042	153460	0.22277	3.90028e-210
ASCL1_MA1631.1	ASCL1	MA1631.1	C_ASCL1	168154	0.08092	63492	0.07977	63987	0.10107	3.38435e-165
ATF2_MA1632.1	ATF2	MA1632.1	C_FOSL1::JUN	62780	0.09546	23621	0.09751	25414	-0.04085	2.41915e-101
BACH1_MA1633.2	BACH1	MA1633.2	C_FOSL1::JUN	75712	0.0682	22626	0.07056	24731	-0.04112	1.00845e-108
BATF_MA1634.1	BATF	MA1634.1	C_FOSL1::JUN	82697	0.06876	25821	0.07094	28008	-0.02955	1.57419e-90
BHLHE22_MA1635.1	BHLHE22	MA1635.1	C_Tcf12	114178	0.09955	49384	0.10301	50197	0.04291	3.42557e-117
CEBPG_MA1636.1	CEBPG	MA1636.1	C_CEBPG	53266	0.06325	14682	0.06694	16357	-0.08409	7.95951e-122
EBF3_MA1637.1	EBF3	MA1637.1	C_EBF1	121264	0.08751	49688	0.08276	48705	0.14617	2.06918e-174
HAND2_MA1638.1	HAND2	MA1638.1	C_Neurod2	138271	0.07554	48585	0.07993	51820	-0.03003	3.11275e-110
MEIS1_MA1639.1	MEIS1	MA1639.1	C_MEIS2	53993	0.05969	13541	0.0631	15220	-0.09036	7.16596e-133
MEIS2_MA1640.1	MEIS2	MA1640.1	C_MEIS2	63308	0.05236	13631	0.05572	15397	-0.09523	1.63693e-137
MYF5_MA1641.1	MYF5	MA1641.1	C_Tcf12	105456	0.09769	45129	0.10108	46182	0.03074	1.26047e-94
NEUROG2_MA1642.1	NEUROG2	MA1642.1	C_Neurod2	135610	0.07525	47277	0.07978	50581	-0.03568	2.35693e-115
NFIB_MA1643.1	NFIB	MA1643.1	C_NFIB	128520	0.10488	60700	0.10222	59931	0.12485	5.64988e-166
NFYC_MA1644.1	NFYC	MA1644.1	C_NFYA	56043	0.15121	22381	0.1438	23412	0.03302	1.29975e-90
NKX2-2_MA1645.1	NKX2-2	MA1645.1	C_NKX2-2	94608	0.08078	35863	0.08094	37878	0.02027	7.15136e-80
OSR2_MA1646.1	OSR2	MA1646.1	C_OSR2	159759	0.08356	60087	0.08341	62092	0.04473	1.41873e-129
Prdm4_MA1647.2	Prdm4	MA1647.2	C_Prdm4	87400	0.07865	31349	0.07916	32811	0.00274	2.23891e-13
TCF12_MA1648.1	TCF12	MA1648.1	C_ASCL1	130848	0.08914	51911	0.08318	50784	0.16857	1.51796e-183
ZBTB12_MA1649.1	ZBTB12	MA1649.1	C_ZBTB12	104225	0.0747	38288	0.07449	40086	0.02892	5.86894e-99
ZBTB14_MA1650.1	ZBTB14	MA1650.1	C_ZBTB14	70301	0.14278	38485	0.10882	31975	0.6362	4.03405e-220
ZFP42_MA1651.1	ZFP42	MA1651.1	C_ZFP42	99062	0.09018	37412	0.08854	38783	0.05198	5.75533e-126
ZKSCAN5_MA1652.1	ZKSCAN5	MA1652.1	C_ZKSCAN5	208354	0.08776	82482	0.08423	83913	0.08919	2.25948e-158
ZNF148_MA1653.1	ZNF148	MA1653.1	C_PATZ1	309773	0.12092	148315	0.10503	139630	0.28205	2.94097e-214
ZNF16_MA1654.1	ZNF16	MA1654.1	C_ZNF16	148993	0.08786	59826	0.0848	60560	0.09702	1.51926e-162
ZNF341_MA1655.1	ZNF341	MA1655.1	C_ZNF341	116854	0.09179	47087	0.0898	47800	0.08392	2.35339e-147
ZNF449_MA1656.1	ZNF449	MA1656.1	C_ZNF449	126114	0.1017	54852	0.09454	54168	0.15992	4.95718e-179
ZNF652_MA1657.1	ZNF652	MA1657.1	C_ZNF652	61502	0.06393	17748	0.06685	19492	-0.06791	1.68241e-121
FOXA3_MA1683.1	FOXA3	MA1683.1	C_FOXN3	70370	0.06794	21295	0.07091	23483	-0.08152	1.91695e-134
Foxn1_MA1684.1	Foxn1	MA1684.1	C_Foxn1	35748	0.12849	18533	0.10917	16605	0.4015	8.69206e-193
DMRTA1_MA1707.1	DMRTA1	MA1707.1	C_DMRTA1	52417	0.05793	13214	0.06192	14895	-0.10321	5.04746e-143
ETV7_MA1708.1	ETV7	MA1708.1	C_Spi1	81235	0.11673	36518	0.10806	36604	0.14139	7.33399e-164
ZIM3_MA1709.1	ZIM3	MA1709.1	C_ZIM3	180855	0.0654	52938	0.0677	56317	-0.03942	1.93098e-121
ZNF257_MA1710.1	ZNF257	MA1710.1	C_ZNF257	252737	0.08987	101914	0.08494	102473	0.11384	1.73896e-173
ZNF343_MA1711.1	ZNF343	MA1711.1	C_ZNF343	79347	0.10487	35640	0.09473	33971	0.2272	4.70847e-178
ZNF454_MA1712.1	ZNF454	MA1712.1	C_ZNF454	172988	0.1099	83786	0.09247	74542	0.39719	3.47334e-217
ZNF610_MA1713.1	ZNF610	MA1713.1	C_ZNF610	132823	0.13862	73368	0.10682	61192	0.62282	3.49829e-238
ZNF675_MA1714.1	ZNF675	MA1714.1	C_ZNF675	110826	0.08157	40369	0.08142	41875	0.01976	2.61016e-85
ZNF707_MA1715.1	ZNF707	MA1715.1	C_ZNF707	138703	0.09157	57207	0.08805	58176	0.09869	4.06614e-157
ZNF76_MA1716.1	ZNF76	MA1716.1	C_ZNF76	112422	0.10453	46742	0.09876	47233	0.11044	3.82522e-155
ZNF784_MA1717.1	ZNF784	MA1717.1	C_ZNF784	33932	0.0729	12149	0.0739	13199	-0.01207	1.16415e-41
ZNF8_MA1718.1	ZNF8	MA1718.1	C_ZNF8	58712	0.05638	16288	0.06062	19011	-0.11305	1.94643e-147
ZNF816_MA1719.1	ZNF816	MA1719.1	C_ZNF816	145259	0.09317	61792	0.08694	60519	0.16439	2.67927e-180
ZNF85_MA1720.1	ZNF85	MA1720.1	C_ZNF85	70495	0.0734	23695	0.0762	25590	-0.04328	3.54402e-110
ZNF93_MA1721.1	ZNF93	MA1721.1	C_ZNF93	127594	0.11435	62803	0.09464	54494	0.46083	5.37665e-221
ZSCAN31_MA1722.1	ZSCAN31	MA1722.1	C_ZSCAN31	64879	0.08666	25227	0.08524	25859	0.05488	9.19969e-120
PRDM9_MA1723.1	PRDM9	MA1723.1	C_PRDM9	379763	0.09642	161546	0.08926	158448	0.16266	5.6255e-196
Rfx6_MA1724.1	Rfx6	MA1724.1	C_Rfx6	104154	0.08215	38818	0.08145	40149	0.041	1.13517e-114
ZNF189_MA1725.1	ZNF189	MA1725.1	C_ZNF189	153484	0.08423	58559	0.08263	59969	0.06754	3.93856e-141
ZNF331_MA1726.1	ZNF331	MA1726.1	C_ZNF331	181194	0.09137	75300	0.08755	75230	0.12725	4.94415e-173
ZNF417_MA1727.1	ZNF417	MA1727.1	C_ZNF417	49708	0.11545	23699	0.10523	22375	0.25324	1.57647e-170
ZNF549_MA1728.1	ZNF549	MA1728.1	C_ZNF549	178641	0.09546	76555	0.09069	74555	0.16691	8.75299e-183
ZNF680_MA1729.1	ZNF680	MA1729.1	C_ZNF680	123968	0.06688	36481	0.06888	38604	-0.03233	1.32265e-104
ZNF708_MA1730.1	ZNF708	MA1730.1	C_ZNF708	141733	0.09221	58960	0.0881	58896	0.1275	2.92257e-173
ZNF768_MA1731.1	ZNF768	MA1731.1	C_ZNF768	217658	0.09035	89031	0.08756	90000	0.08935	1.2363e-159
BNC2_MA1928.1	BNC2	MA1928.1	C_FOSL1::JUN	78774	0.07052	25280	0.07267	27334	-0.02501	1.44907e-89
CTCF_MA1929.1	CTCF	MA1929.1	C_CTCF	194307	0.11856	96169	0.11149	92498	0.21537	3.22362e-200
CTCF_MA1930.1	CTCF	MA1930.1	C_CTCF	168154	0.11937	84146	0.11315	81344	0.20456	9.32151e-190
ELK1HOXA1_MA1931.1	ELK1::HOXA1	MA1931.1	C_ELK1::HOXA1	39093	0.1186	16337	0.11184	16619	0.09236	3.87696e-127
ELK1HOXB13_MA1932.1	ELK1::HOXB13	MA1932.1	C_ELK1::HOXB13	30407	0.10453	12023	0.09985	12355	0.04971	2.3384e-88
ELK1SREBF2_MA1933.1	ELK1::SREBF2	MA1933.1	C_ELK1::SREBF2	36733	0.12695	16718	0.11561	16758	0.16205	7.27731e-155
ERFFIGLA_MA1934.1	ERF::FIGLA	MA1934.1	C_ETV5::FIGLA	94511	0.08648	37433	0.08414	37847	0.09253	2.37378e-143
ERFFOXI1_MA1935.1	ERF::FOXI1	MA1935.1	C_ERF::FOXI1	108810	0.09	43103	0.08711	44096	0.06166	3.7147e-128
ERFFOXO1_MA1936.1	ERF::FOXO1	MA1936.1	C_ERF::FOXO1	120190	0.08154	44687	0.08049	46115	0.03367	2.1371e-106
ERFHOXB13_MA1937.1	ERF::HOXB13	MA1937.1	C_ERF::HOXB13	40877	0.07574	13614	0.07648	14401	-0.01938	1.0357e-60
ERFNHLH1_MA1938.1	ERF::NHLH1	MA1938.1	C_ERF::NHLH1	98655	0.09362	40429	0.08932	39716	0.14689	1.81649e-169
ERFSREBF2_MA1939.1	ERF::SREBF2	MA1939.1	C_ERF::SREBF2	36071	0.0891	13567	0.08814	14360	0.01852	3.64773e-56
ETV2DRGX_MA1940.1	ETV2::DRGX	MA1940.1	C_ETV5::DRGX	39006	0.07848	12760	0.07974	13595	-0.0252	8.25701e-68
ETV2FIGLA_MA1941.1	ETV2::FIGLA	MA1941.1	C_ETV5::FIGLA	112706	0.08969	45244	0.0861	45271	0.1168	8.77935e-158
ETV2FOXI1_MA1942.1	ETV2::FOXI1	MA1942.1	C_ERF::FOXI1	120276	0.08706	47321	0.08481	48744	0.05649	5.35858e-129
ETV2HOXB13_MA1943.1	ETV2::HOXB13	MA1943.1	C_ETV2::HOXB13	30381	0.07133	9493	0.07269	10140	-0.03739	1.58261e-80
ETV5DRGX_MA1944.1	ETV5::DRGX	MA1944.1	C_ETV5::DRGX	58035	0.08468	20847	0.08392	21747	0.0175	3.73649e-65
ETV5FIGLA_MA1945.1	ETV5::FIGLA	MA1945.1	C_ETV5::FIGLA	142312	0.08584	55944	0.08279	56223	0.10755	1.69015e-165
ETV5FOXI1_MA1946.1	ETV5::FOXI1	MA1946.1	C_ERF::FOXI1	96353	0.08451	37062	0.08303	38209	0.04189	1.0914e-112
ETV5FOXO1_MA1947.1	ETV5::FOXO1	MA1947.1	C_ETV5::FOXO1	108264	0.07843	39651	0.07826	41198	0.0224	2.34744e-89
ETV5HOXA2_MA1948.1	ETV5::HOXA2	MA1948.1	C_ETV5::HOXA2	38752	0.0835	13983	0.08307	14746	0.00204	0.136904
FLI1DRGX_MA1949.1	FLI1::DRGX	MA1949.1	C_ETV5::DRGX	40945	0.08567	14737	0.08534	15344	0.00809	2.89522e-32
FLI1FOXI1_MA1950.1	FLI1::FOXI1	MA1950.1	C_ERF::FOXI1	118559	0.08012	43845	0.07945	45531	0.02732	2.59772e-102
FOS_MA1951.1	FOS	MA1951.1	C_FOSL1::JUN	26519	0.11956	10935	0.11908	11776	-0.01434	1.09632e-49
FOXJ2ELF1_MA1952.1	FOXJ2::ELF1	MA1952.1	C_FOXJ2::ELF1	117893	0.07899	41106	0.07832	42883	0.01323	2.75405e-68
FOXO1ELF1_MA1953.1	FOXO1::ELF1	MA1953.1	C_ERF::FOXI1	126578	0.07642	44771	0.07671	46915	0.00739	1.826e-44
FOXO1ELK1_MA1954.1	FOXO1::ELK1	MA1954.1	C_ERF::FOXI1	129270	0.08049	47494	0.07953	49183	0.02936	2.89683e-106
FOXO1ELK3_MA1955.1	FOXO1::ELK3	MA1955.1	C_ERF::FOXI1	97372	0.07978	34812	0.07957	36369	0.01276	3.99e-59
FOXO1FLI1_MA1956.1	FOXO1::FLI1	MA1956.1	C_ERF::FOXI1	109736	0.0756	37488	0.07626	39325	-0.00506	7.49584e-30
HOXB2ELK1_MA1957.1	HOXB2::ELK1	MA1957.1	C_HOXB2::ELK1	37747	0.10721	15251	0.10299	15743	0.06117	1.00228e-112
HOXD12ELK1_MA1958.1	HOXD12::ELK1	MA1958.1	C_HOXD12::ELK1	42087	0.07572	13601	0.07636	14417	-0.02385	2.08599e-76
KLF7_MA1959.1	KLF7	MA1959.1	C_KLF4	217391	0.13019	105251	0.11228	100336	0.276	4.6796e-211
MGAEVX1_MA1960.1	MGA::EVX1	MA1960.1	C_MGA::EVX1	56983	0.06553	16741	0.0692	18526	-0.07883	5.2076e-129
PATZ1_MA1961.1	PATZ1	MA1961.1	C_PATZ1	295834	0.13053	148323	0.1096	135429	0.36827	8.00416e-226
POU2F1SOX2_MA1962.1	POU2F1::SOX2	MA1962.1	C_POU2F1::SOX2	82473	0.05667	18766	0.06023	21070	-0.09873	9.18733e-148
SATB1_MA1963.1	SATB1	MA1963.1	C_SATB1	42705	0.05872	9795	0.06179	10997	-0.10515	9.39052e-131
SMAD2_MA1964.1	SMAD2	MA1964.1	C_SMAD2	105985	0.08979	44565	0.08745	45062	0.09187	8.00517e-147
SP5_MA1965.1	SP5	MA1965.1	C_SP5	266246	0.10439	117315	0.09621	114694	0.17412	1.02207e-194
TFAP4ETV1_MA1966.1	TFAP4::ETV1	MA1966.1	C_ETV5::FIGLA	123111	0.09453	51167	0.08799	50084	0.1699	1.62563e-179
TFAP4FLI1_MA1967.1	TFAP4::FLI1	MA1967.1	C_TFAP4::FLI1	115127	0.09028	46154	0.09116	47032	0.05384	3.82396e-127
TFCP2_MA1968.1	TFCP2	MA1968.1	C_TFCP2	19955	0.07854	7093	0.07966	7447	-0.01203	2.91429e-28
THRA_MA1969.1	THRA	MA1969.1	C_THRA	130302	0.08809	54251	0.08587	55226	0.07981	3.88152e-151
TRPS1_MA1970.1	TRPS1	MA1970.1	C_Gata3	60988	0.05541	16064	0.05976	18178	-0.10514	1.36143e-139
ZBED2_MA1971.1	ZBED2	MA1971.1	C_ZBED2	17552	0.10641	7544	0.10049	7320	0.15311	5.06661e-131
ZFP14_MA1972.1	ZFP14	MA1972.1	C_ZFP14	237644	0.09216	97287	0.08647	96432	0.13776	8.94351e-184
ZKSCAN3_MA1973.1	ZKSCAN3	MA1973.1	C_ZKSCAN3	138518	0.09175	59869	0.08569	59348	0.15161	1.2469e-179
ZNF211_MA1974.1	ZNF211	MA1974.1	C_ZNF211	51041	0.05069	12594	0.05542	15276	-0.14197	3.23682e-146
ZNF214_MA1975.1	ZNF214	MA1975.1	C_ZNF214	63425	0.07365	21464	0.07558	22921	-0.01829	3.99409e-72
ZNF320_MA1976.1	ZNF320	MA1976.1	C_ZNF320	261003	0.10555	120321	0.09316	112755	0.27149	1.32312e-215
ZNF324_MA1977.1	ZNF324	MA1977.1	C_ZNF324	126790	0.07941	47037	0.07934	48973	0.03585	2.00381e-114
ZNF354A_MA1978.1	ZNF354A	MA1978.1	C_ZNF354A	128341	0.04708	24718	0.05053	27627	-0.09665	5.41701e-153
ZNF416_MA1979.1	ZNF416	MA1979.1	C_ZNF416	130589	0.09074	54027	0.0886	54642	0.08667	1.75245e-156
ZNF418_MA1980.1	ZNF418	MA1980.1	C_ZNF418	141285	0.0735	48444	0.07458	50951	0.00074	0.000359962
ZNF530_MA1981.1	ZNF530	MA1981.1	C_ZNF530	298049	0.10551	134529	0.09528	128690	0.2213	4.58549e-209
ZNF574_MA1982.1	ZNF574	MA1982.1	C_ZNF574	108943	0.10963	50324	0.10023	48773	0.20047	1.07052e-180
ZNF582_MA1983.1	ZNF582	MA1983.1	C_ZNF582	87278	0.07466	29647	0.07621	31189	0.00418	4.51858e-20
ZNF667_MA1984.1	ZNF667	MA1984.1	C_ZNF667	95772	0.07533	33930	0.07647	36048	0.00021	0.736291
ZNF669_MA1985.1	ZNF669	MA1985.1	C_ZNF669	43276	0.10484	19901	0.09382	18483	0.26833	6.26887e-174
ZNF692_MA1986.1	ZNF692	MA1986.1	C_ZNF692	106479	0.10053	47462	0.09248	45918	0.19538	1.0202e-179
ZNF701_MA1987.1	ZNF701	MA1987.1	C_ZNF701	283399	0.09545	118844	0.08864	116662	0.15761	2.62112e-194
Atf3_MA1988.1	Atf3	MA1988.1	C_FOSL1::JUN	83971	0.0698	26735	0.07202	28909	-0.02687	4.65825e-91
Bcl11B_MA1989.1	Bcl11B	MA1989.1	C_Bcl11B	126499	0.06904	41045	0.07076	43725	-0.01896	5.55286e-90
Gli1_MA1990.1	Gli1	MA1990.1	C_Gli2	127032	0.08732	52092	0.0842	52821	0.10084	1.6638e-161
Hnf1A_MA1991.1	Hnf1A	MA1991.1	C_Lef1	102625	0.07642	35254	0.07821	37222	-0.01133	2.44161e-58
Ikzf3_MA1992.1	Ikzf3	MA1992.1	C_Erg	208038	0.09366	87087	0.08872	87168	0.12087	2.46253e-178
Neurod2_MA1993.1	Neurod2	MA1993.1	C_Tcf12	110845	0.09969	47877	0.10335	48777	0.03603	3.85448e-107
Nkx2-1_MA1994.1	Nkx2-1	MA1994.1	C_Nkx2-1	66288	0.06708	21681	0.06966	23528	-0.04186	3.62109e-105
Npas4_MA1995.1	Npas4	MA1995.1	C_Npas4	25115	0.10044	10518	0.09727	10830	0.08049	2.24514e-119
Nr1H2_MA1996.1	Nr1H2	MA1996.1	C_Nr1H2	100311	0.07867	39431	0.07951	41718	0.00634	1.11571e-31
Olig2_MA1997.1	Olig2	MA1997.1	C_Tcf12	114668	0.09954	49479	0.10327	50337	0.03696	1.5217e-110
Prdm14_MA1998.1	Prdm14	MA1998.1	C_Prdm14	66419	0.07935	25528	0.07983	26927	0.00815	2.60992e-43
Prdm5_MA1999.1	Prdm5	MA1999.1	C_Prdm5	157238	0.08199	59498	0.08076	61111	0.05918	2.64106e-138
Six4_MA2001.1	Six4	MA2001.1	C_SIX1	69755	0.06461	21532	0.06696	23495	-0.04593	1.59907e-109
Zfp335_MA2002.1	Zfp335	MA2002.1	C_Zfp335	151540	0.08325	58953	0.08186	60157	0.07451	1.3525e-149
NKX2-4_MA2003.1	NKX2-4	MA2003.1	C_NKX2-3	78684	0.07745	28403	0.0782	30103	0.00165	0.00015192

## Sheet: 8wkctx neun pos
output_prefix	name	motif_id	cluster	total_tfbs	WT.COR.8W.Pos_footprints_mean_score	WT.COR.8W.Pos_footprints_bound	HD.COR.8W.Pos_footprints_mean_score	HD.COR.8W.Pos_footprints_bound	WT.COR.8W.Pos_footprints_HD.COR.8W.Pos_footprints_change	WT.COR.8W.Pos_footprints_HD.COR.8W.Pos_footprints_pvalue
Runx1_MA0002.2	Runx1	MA0002.2	C_Bcl11B	146497	0.0812	44132	0.08063	44011	0.01816	4.18027e-83
TFAP2A_MA0003.4	TFAP2A	MA0003.4	C_TFAP2C	140246	0.10783	55343	0.11474	56043	-0.04601	8.18102e-118
Arnt_MA0004.1	Arnt	MA0004.1	C_MYC	45263	0.1103	17513	0.11518	17606	-0.01099	3.59283e-49
AhrArnt_MA0006.1	Ahr::Arnt	MA0006.1	C_Ahr::Arnt	61000	0.1161	25366	0.12152	25689	-0.03005	1.2658e-90
Ar_MA0007.3	Ar	MA0007.3	C_Ar	49035	0.08775	16453	0.0898	16938	-0.02768	5.77561e-79
TBXT_MA0009.2	TBXT	MA0009.2	C_TBXT	39454	0.07648	11072	0.07562	11170	0.011	2.11576e-35
PAX5_MA0014.3	PAX5	MA0014.3	C_PAX5	39294	0.13855	16466	0.15332	16991	-0.10043	1.24147e-133
NR2F1_MA0017.2	NR2F1	MA0017.2	C_NR2F1	91608	0.06651	19518	0.06958	21262	-0.05313	5.94924e-119
CREB1_MA0018.4	CREB1	MA0018.4	C_FOSL1::JUN	78091	0.08317	22103	0.08345	22078	0.02403	2.86337e-78
Ddit3Cebpa_MA0019.1	Ddit3::Cebpa	MA0019.1	C_Ddit3::Cebpa	42402	0.08087	12653	0.07972	12287	0.03008	3.22918e-80
E2F1_MA0024.3	E2F1	MA0024.3	C_ZNF417	9513	0.16206	4964	0.17478	4955	-0.06574	8.20167e-88
NFIL3_MA0025.2	NFIL3	MA0025.2	C_NFIL3	56018	0.07864	15727	0.0728	14071	0.12171	2.65034e-146
EN1_MA0027.2	EN1	MA0027.2	C_ESX1	31891	0.0723	7308	0.07363	7369	-0.00434	4.35691e-08
ELK1_MA0028.2	ELK1	MA0028.2	C_ETS1	28121	0.19441	12894	0.2142	13026	-0.07923	2.95127e-116
Mecom_MA0029.1	Mecom	MA0029.1	C_Mecom	69292	0.06339	14214	0.0624	14163	0.0138	5.71523e-56
FOXF2_MA0030.1	FOXF2	MA0030.1	C_FOXF2	63424	0.05974	11435	0.06267	12687	-0.08545	5.80701e-140
FOXD1_MA0031.1	FOXD1	MA0031.1	C_FOXN3	65021	0.06849	14880	0.0711	16082	-0.06858	1.61622e-127
FOXC1_MA0032.2	FOXC1	MA0032.2	C_FOXC2	106773	0.05127	14417	0.05311	15686	-0.07575	1.50211e-139
FOXL1_MA0033.2	FOXL1	MA0033.2	C_FOXN3	48756	0.06558	10321	0.06936	11509	-0.09387	1.45646e-126
GATA1_MA0035.4	GATA1	MA0035.4	C_GATA1	44376	0.0664	10021	0.06476	9716	0.03995	1.9768e-97
GATA2_MA0036.3	GATA2	MA0036.3	C_Gata3	51691	0.06748	12025	0.06623	11804	0.02646	8.40298e-79
Gata3_MA0037.4	Gata3	MA0037.4	C_Gata3	59164	0.06598	13339	0.06434	13083	0.02991	7.40461e-86
GFI1_MA0038.2	GFI1	MA0038.2	C_Gfi1B	76361	0.079	20384	0.07844	19951	0.02839	2.97446e-89
KLF4_MA0039.4	KLF4	MA0039.4	C_KLF4	287688	0.12217	117419	0.13016	116693	-0.02591	8.21068e-118
Foxq1_MA0040.1	Foxq1	MA0040.1	C_Foxq1	74161	0.05546	11560	0.05695	12426	-0.0592	1.78811e-121
FOXD3_MA0041.2	FOXD3	MA0041.2	C_FOXD3	160701	0.05062	20521	0.05261	22311	-0.08637	3.19526e-160
FOXI1_MA0042.2	FOXI1	MA0042.2	C_FOXN3	80421	0.0674	17956	0.07039	19515	-0.07144	2.83958e-128
HLF_MA0043.3	HLF	MA0043.3	C_NFIL3	49820	0.08364	15296	0.077	13678	0.13811	8.142e-146
HNF1A_MA0046.2	HNF1A	MA0046.2	C_HNF1A	49946	0.04806	5770	0.04944	6083	-0.06392	7.75623e-117
FOXA2_MA0047.3	FOXA2	MA0047.3	C_FOXN3	80339	0.06035	15095	0.06324	16768	-0.08502	1.44131e-139
NHLH1_MA0048.2	NHLH1	MA0048.2	C_Tcf12	109209	0.10125	44458	0.10255	44052	0.00949	2.70902e-58
Irf1_MA0050.3	Irf1	MA0050.3	C_Irf1	169670	0.0644	36236	0.06323	34797	0.01972	8.00369e-87
IRF2_MA0051.1	IRF2	MA0051.1	C_IRF2	76985	0.0684	17457	0.06774	16948	0.01943	1.76494e-73
MEF2A_MA0052.4	MEF2A	MA0052.4	C_MEF2A	142308	0.07132	34511	0.06624	31102	0.07733	5.7928e-144
MZF1_MA0056.2	MZF1	MA0056.2	C_MZF1	83707	0.0816	25194	0.08156	24956	0.01807	1.3478e-70
MAX_MA0058.3	MAX	MA0058.3	C_MYC	33449	0.11251	13285	0.11718	13323	-0.00975	5.93743e-38
MAXMYC_MA0059.1	MAX::MYC	MA0059.1	C_MAX::MYC	54218	0.09339	17784	0.09591	17949	-0.01734	4.57441e-65
NFYA_MA0060.3	NFYA	MA0060.3	C_NFYA	51998	0.14109	16444	0.14869	16313	0.01561	1.43243e-54
GABPA_MA0062.3	GABPA	MA0062.3	C_Erg	184318	0.08974	57695	0.09022	56504	0.0298	2.49617e-111
NKX2-5_MA0063.2	NKX2-5	MA0063.2	C_NKX2-5	64592	0.07342	16917	0.07238	16730	0.0248	3.17272e-85
PpargRxra_MA0065.2	Pparg::Rxra	MA0065.2	C_Pparg::Rxra	176243	0.07866	49074	0.08091	50454	-0.01852	2.43226e-87
PPARG_MA0066.1	PPARG	MA0066.1	C_PPARG	73938	0.07827	21437	0.07938	21874	-0.01427	4.02948e-62
PAX2_MA0067.2	PAX2	MA0067.2	C_PAX9	23510	0.13126	10173	0.14458	10336	-0.09779	9.98478e-116
PAX4_MA0068.2	PAX4	MA0068.2	C_PAX4	20172	0.0608	3713	0.0619	3776	-0.02646	1.02052e-66
PAX6_MA0069.1	PAX6	MA0069.1	C_PAX6	35541	0.07803	9920	0.07707	9670	0.03299	1.99484e-83
PBX1_MA0070.1	PBX1	MA0070.1	C_PBX1	44944	0.0657	8778	0.06574	8629	0.01196	8.03403e-43
RORA_MA0071.1	RORA	MA0071.1	C_RORA	74157	0.06288	15160	0.06513	16433	-0.05015	2.51854e-114
RORA_MA0072.1	RORA	MA0072.1	C_RORA	58594	0.06759	13683	0.068	13953	-0.01088	1.28461e-45
RREB1_MA0073.1	RREB1	MA0073.1	C_RREB1	252245	0.07918	68402	0.08085	68660	-0.01893	2.20256e-101
RXRAVDR_MA0074.1	RXRA::VDR	MA0074.1	C_RXRA::VDR	46050	0.07345	11398	0.07561	11903	-0.0332	3.32355e-85
PRRX2_MA0075.3	PRRX2	MA0075.3	C_PAX4	39571	0.0612	7561	0.06185	7652	-0.01188	2.13273e-42
ELK4_MA0076.2	ELK4	MA0076.2	C_ETS1	78111	0.13669	30903	0.146	30628	-0.01822	2.25502e-73
SOX9_MA0077.1	SOX9	MA0077.1	C_Sox17	52436	0.06158	9928	0.06221	10090	-0.0142	2.04766e-50
Sox17_MA0078.2	Sox17	MA0078.2	C_Sox17	90122	0.06524	18915	0.06568	19096	-0.00727	1.5955e-42
SP1_MA0079.5	SP1	MA0079.5	C_PATZ1	239011	0.14651	109080	0.16268	110181	-0.10103	1.6465e-172
Spi1_MA0080.6	Spi1	MA0080.6	C_Spi1	257013	0.08142	72947	0.08049	70207	0.04624	9.07533e-134
SPIB_MA0081.2	SPIB	MA0081.2	C_Spi1	217610	0.08313	63009	0.08229	60705	0.04523	3.94872e-136
SRF_MA0083.3	SRF	MA0083.3	C_SRF	27750	0.07508	7060	0.07383	6909	0.03407	2.16174e-75
SRY_MA0084.1	SRY	MA0084.1	C_SRY	62069	0.05499	9457	0.05626	9815	-0.04777	4.98613e-104
Sox5_MA0087.2	Sox5	MA0087.2	C_Sox17	79683	0.0666	17384	0.06707	17498	-0.00805	7.00835e-44
ZNF143_MA0088.2	ZNF143	MA0088.2	C_ZNF76	83822	0.09479	27195	0.09443	26289	0.04764	1.43603e-112
MAFGNFE2L1_MA0089.2	MAFG::NFE2L1	MA0089.2	C_MAFG::NFE2L1	101591	0.09021	36391	0.08719	34884	0.06275	3.65862e-131
TEAD1_MA0090.3	TEAD1	MA0090.3	C_TEAD4	93511	0.07834	27827	0.0765	27067	0.04428	2.7844e-113
TAL1TCF3_MA0091.1	TAL1::TCF3	MA0091.1	C_TAL1::TCF3	93925	0.08879	33313	0.08854	33642	-0.00981	8.81052e-50
Hand1Tcf3_MA0092.1	Hand1::Tcf3	MA0092.1	C_Hand1::Tcf3	89793	0.08095	27696	0.07964	26965	0.03564	1.19003e-103
USF1_MA0093.3	USF1	MA0093.3	C_BHLHE41	75610	0.08632	22925	0.08744	23111	0.00985	1.53782e-51
Yy1_MA0095.3	Yy1	MA0095.3	C_Yy1	94351	0.07993	24097	0.08106	23415	0.01997	8.77454e-76
ETS1_MA0098.3	ETS1	MA0098.3	C_ETS1	47612	0.1361	17433	0.14562	17407	-0.02008	2.21656e-70
FOSJUN_MA0099.3	FOS::JUN	MA0099.3	C_FOSL1::JUN	70206	0.10733	30919	0.10377	29478	0.07754	7.98304e-128
MYB_MA0100.3	MYB	MA0100.3	C_MYB	73042	0.08018	21882	0.07936	21474	0.02274	2.35393e-84
REL_MA0101.1	REL	MA0101.1	C_REL	65125	0.08872	20461	0.09021	20052	0.01622	3.16144e-64
CEBPA_MA0102.4	CEBPA	MA0102.4	C_CEBPB	50479	0.0685	11986	0.06599	11335	0.04954	4.65599e-103
ZEB1_MA0103.3	ZEB1	MA0103.3	C_ASCL1	137428	0.08746	47160	0.08844	47069	0.00762	6.0587e-49
MYCN_MA0104.4	MYCN	MA0104.4	C_MYCN	36840	0.11702	15331	0.12242	15354	-0.02439	1.3008e-67
NFKB1_MA0105.4	NFKB1	MA0105.4	C_NFKB2	36279	0.09503	12970	0.09937	13108	-0.03025	6.22334e-80
TP53_MA0106.3	TP53	MA0106.3	C_TP53	47790	0.07982	13893	0.08039	13959	0.01003	3.66557e-41
RELA_MA0107.1	RELA	MA0107.1	C_RELA	72051	0.08625	22923	0.08628	22183	0.03337	7.7079e-97
TBP_MA0108.2	TBP	MA0108.2	C_TBP	42163	0.07857	11096	0.07648	10674	0.05453	1.43536e-102
Spz1_MA0111.1	Spz1	MA0111.1	C_Spz1	76896	0.08424	23791	0.0849	23626	0.00902	2.3474e-39
ESR1_MA0112.3	ESR1	MA0112.3	C_ESR2	57467	0.07895	16174	0.08267	17108	-0.05398	1.73411e-119
NR3C1_MA0113.3	NR3C1	MA0113.3	C_Ar	43657	0.0823	13705	0.08381	14169	-0.02807	7.05724e-73
HNF4A_MA0114.4	HNF4A	MA0114.4	C_HNF4G	91355	0.0713	22741	0.07191	22987	-0.00461	5.28616e-27
NR1H2RXRA_MA0115.1	NR1H2::RXRA	MA0115.1	C_NR1H2::RXRA	76236	0.06385	15321	0.06551	16215	-0.0324	1.96148e-101
Znf423_MA0116.1	Znf423	MA0116.1	C_Znf423	77627	0.09399	26537	0.09703	26833	-0.01933	5.27067e-71
Mafb_MA0117.2	Mafb	MA0117.2	C_MAFF	74264	0.07972	22622	0.07804	21907	0.04103	2.04059e-103
NFICTLX1_MA0119.1	NFIC::TLX1	MA0119.1	C_NFIB	91680	0.09138	31973	0.09174	31349	0.0192	5.38857e-78
Nkx3-2_MA0122.3	Nkx3-2	MA0122.3	C_ISL2	58770	0.06591	13079	0.06493	12861	0.01684	1.4115e-66
Nkx3-1_MA0124.2	Nkx3-1	MA0124.2	C_ISL2	55839	0.07372	14771	0.07278	14569	0.01782	7.55461e-63
Nobox_MA0125.1	Nobox	MA0125.1	C_Dlx2	34461	0.06731	7222	0.06769	7094	0.01022	3.3282e-32
ZNF354C_MA0130.1	ZNF354C	MA0130.1	C_ZNF354C	215514	0.09718	78742	0.09695	77116	0.03763	8.8853e-126
HINFP_MA0131.2	HINFP	MA0131.2	C_HINFP	34399	0.19356	21030	0.22818	21768	-0.30155	3.80573e-174
PDX1_MA0132.2	PDX1	MA0132.2	C_ESX1	32623	0.06309	6482	0.06444	6734	-0.02582	3.30067e-71
Lhx3_MA0135.1	Lhx3	MA0135.1	C_Lhx3	65448	0.04993	8141	0.05081	8310	-0.03816	4.01679e-103
Elf5_MA0136.3	Elf5	MA0136.3	C_Elf5	204794	0.08105	59217	0.07995	57214	0.04792	1.65371e-125
STAT1_MA0137.3	STAT1	MA0137.3	C_Stat4	107020	0.0783	29215	0.07669	28010	0.04677	2.71764e-118
REST_MA0138.2	REST	MA0138.2	C_REST	129972	0.0957	47086	0.09956	47660	-0.02933	4.34145e-104
CTCF_MA0139.1	CTCF	MA0139.1	C_CTCF	162055	0.126	73831	0.13055	73755	-0.0142	1.79173e-73
GATA1TAL1_MA0140.2	GATA1::TAL1	MA0140.2	C_GATA1::TAL1	59440	0.07469	15929	0.07372	15933	0.02068	4.89741e-69
ESRRB_MA0141.3	ESRRB	MA0141.3	C_NR5A1	76175	0.06399	16185	0.06575	17133	-0.03733	2.45808e-99
Pou5f1Sox2_MA0142.1	Pou5f1::Sox2	MA0142.1	C_Pou5f1::Sox2	106008	0.06341	22135	0.06236	21809	0.01794	3.30521e-77
SOX2_MA0143.4	SOX2	MA0143.4	C_SOX13	74821	0.06263	14876	0.06289	15034	-0.00935	4.1135e-44
STAT3_MA0144.2	STAT3	MA0144.2	C_Stat4	139033	0.0803	39665	0.07833	37795	0.05186	1.63552e-131
Tfcp2l1_MA0145.2	Tfcp2l1	MA0145.2	C_Tfcp2l1	117307	0.10242	44933	0.10622	44946	-0.01724	3.11315e-80
Zfx_MA0146.2	Zfx	MA0146.2	C_Zfx	139241	0.13056	61969	0.14442	62977	-0.10269	4.44184e-154
MYC_MA0147.3	MYC	MA0147.3	C_MYC	57482	0.11669	24362	0.12299	24525	-0.03425	1.40773e-90
FOXA1_MA0148.4	FOXA1	MA0148.4	C_FOXN3	81809	0.06074	15504	0.06318	16956	-0.07179	9.85599e-132
EWSR1-FLI1_MA0149.1	EWSR1-FLI1	MA0149.1	C_EWSR1-FLI1	284012	0.08765	90586	0.08752	87445	0.03982	5.21313e-135
Nfe2l2_MA0150.2	Nfe2l2	MA0150.2	C_MAFG::NFE2L1	99220	0.09275	36410	0.09045	35032	0.05786	1.33882e-127
Arid3a_MA0151.1	Arid3a	MA0151.1	C_Arid3a	334755	0.05408	51020	0.05418	50891	-0.0198	7.16511e-110
Nfatc2_MA0152.2	Nfatc2	MA0152.2	C_Nfatc2	119672	0.07155	29665	0.06925	28070	0.05265	2.71051e-128
HNF1B_MA0153.2	HNF1B	MA0153.2	C_HNF1A	35571	0.05125	4789	0.05221	4878	-0.03831	9.32156e-86
EBF1_MA0154.4	EBF1	MA0154.4	C_EBF1	130422	0.09136	44627	0.09389	44736	-0.01015	2.00213e-58
INSM1_MA0155.1	INSM1	MA0155.1	C_INSM1	119334	0.09268	39601	0.09722	39823	-0.0294	1.08894e-107
FEV_MA0156.3	FEV	MA0156.3	C_ETS1	32928	0.17164	13826	0.18754	13927	-0.05627	2.07892e-98
Foxo3_MA0157.3	Foxo3	MA0157.3	C_FOXN3	69039	0.06191	13170	0.06533	14660	-0.09501	1.50925e-135
HOXA5_MA0158.2	HOXA5	MA0158.2	C_HOXA5	32679	0.06784	7412	0.06835	7564	-0.00418	5.20063e-15
RARARXRA_MA0159.1	RARA::RXRA	MA0159.1	C_RARA::RXRA	86715	0.0802	25142	0.08288	25647	-0.01969	1.51973e-78
NR4A2_MA0160.2	NR4A2	MA0160.2	C_NR4A1	83795	0.06397	17262	0.0639	17198	0.00796	3.85404e-42
NFIC_MA0161.2	NFIC	MA0161.2	C_NFIX	106134	0.08891	36733	0.08625	34996	0.06692	4.39046e-133
EGR1_MA0162.4	EGR1	MA0162.4	C_EGR1	200671	0.14674	97512	0.16214	97472	-0.09153	1.41867e-161
PLAG1_MA0163.1	PLAG1	MA0163.1	C_PLAG1	164068	0.10303	60578	0.11028	61667	-0.05167	7.08986e-135
Nr2e3_MA0164.1	Nr2e3	MA0164.1	C_Nr2e3	42625	0.08042	12629	0.07855	12096	0.04412	5.32399e-94
ESR2_MA0258.2	ESR2	MA0258.2	C_ESR2	126642	0.07795	35969	0.08144	38308	-0.05972	1.4501e-134
ARNTHIF1A_MA0259.1	ARNT::HIF1A	MA0259.1	C_ARNT::HIF1A	27743	0.11308	11422	0.11957	11604	-0.04456	1.90368e-82
SOX10_MA0442.2	SOX10	MA0442.2	C_SOX4	139391	0.06601	30246	0.06636	30569	-0.00933	2.84686e-57
Atoh1_MA0461.2	Atoh1	MA0461.2	C_ATOH7	50253	0.09403	19567	0.09175	19341	0.02536	2.16624e-78
BATFJUN_MA0462.2	BATF::JUN	MA0462.2	C_FOSL1::JUN	83377	0.1013	34453	0.09761	32943	0.07348	3.76282e-131
BCL6_MA0463.2	BCL6	MA0463.2	C_BCL6	74593	0.07663	20404	0.07628	20253	0.00965	1.65414e-42
BHLHE40_MA0464.2	BHLHE40	MA0464.2	C_MYC	26106	0.12457	10593	0.13432	10671	-0.03641	3.56393e-81
CDX2_MA0465.2	CDX2	MA0465.2	C_CDX2	77609	0.05773	12986	0.05774	12834	-0.01026	2.88267e-47
CEBPB_MA0466.3	CEBPB	MA0466.3	C_CEBPB	6417	0.10087	2023	0.10012	1964	0.05546	6.48126e-73
Crx_MA0467.2	Crx	MA0467.2	C_OTX2	54578	0.06605	11732	0.06597	11753	-0.00049	0.0431588
DUX4_MA0468.1	DUX4	MA0468.1	C_DUX4	53096	0.0633	10430	0.06297	10143	0.01555	1.56919e-56
E2F3_MA0469.3	E2F3	MA0469.3	C_E2F3	7517	0.08671	2136	0.08811	2078	-0.00118	0.542144
E2F4_MA0470.2	E2F4	MA0470.2	C_ZNF417	9656	0.15623	4688	0.16666	4656	-0.04261	4.0095e-66
E2F6_MA0471.2	E2F6	MA0471.2	C_E2F6	188683	0.13158	83413	0.14211	82774	-0.05042	1.31554e-142
EGR2_MA0472.2	EGR2	MA0472.2	C_EGR1	61147	0.1716	34958	0.18706	34379	-0.06215	1.83491e-119
ELF1_MA0473.3	ELF1	MA0473.3	C_Erg	180182	0.09249	57387	0.09348	56236	0.02851	1.92192e-114
Erg_MA0474.3	Erg	MA0474.3	C_Erg	191423	0.09068	60153	0.09148	59054	0.02822	2.25181e-113
FLI1_MA0475.2	FLI1	MA0475.2	C_ETS1	36878	0.14979	14074	0.1619	14083	-0.03514	1.28539e-88
FOS_MA0476.1	FOS	MA0476.1	C_FOSL1::JUN	81005	0.10354	34512	0.09947	32846	0.08259	2.28818e-138
FOSL1_MA0477.2	FOSL1	MA0477.2	C_FOSL1::JUN	74320	0.10513	32325	0.10117	30856	0.07841	2.56403e-133
FOSL2_MA0478.1	FOSL2	MA0478.1	C_FOSL1::JUN	110181	0.09196	39806	0.08978	38665	0.03928	8.88517e-113
FOXH1_MA0479.1	FOXH1	MA0479.1	C_FOXH1	71984	0.06902	17172	0.06906	17242	0.00301	3.81996e-15
Foxo1_MA0480.2	Foxo1	MA0480.2	C_FOXN3	77787	0.07102	19007	0.07274	19979	-0.04551	1.34456e-119
FOXP1_MA0481.3	FOXP1	MA0481.3	C_FOXN3	77226	0.05993	14118	0.06311	15630	-0.09314	1.27253e-140
GATA4_MA0482.2	GATA4	MA0482.2	C_Gata3	63880	0.06761	14932	0.06636	14611	0.02893	1.71776e-91
Gfi1B_MA0483.1	Gfi1B	MA0483.1	C_Gfi1B	117991	0.07653	31879	0.07543	31289	0.03004	2.64149e-102
HNF4G_MA0484.2	HNF4G	MA0484.2	C_HNF4G	92683	0.07206	23483	0.07276	23804	-0.00505	2.96076e-28
HOXC9_MA0485.2	HOXC9	MA0485.2	C_HOXC10	24504	0.06163	4675	0.06226	4748	-0.02034	1.28661e-50
HSF1_MA0486.2	HSF1	MA0486.2	C_HSF4	59428	0.0767	16297	0.07392	15206	0.07484	5.30966e-125
JUN_MA0488.1	JUN	MA0488.1	C_FOSL1::JUN	69841	0.08547	20182	0.08535	19719	0.03304	1.05064e-90
Jun_MA0489.2	Jun	MA0489.2	C_FOSL1::JUN	77279	0.10532	33673	0.10141	32187	0.078	2.66307e-132
JUNB_MA0490.2	JUNB	MA0490.2	C_FOSL1::JUN	75710	0.1034	32199	0.09956	30732	0.0768	7.98996e-135
JUND_MA0491.2	JUND	MA0491.2	C_FOSL1::JUN	71326	0.10434	30665	0.10047	29258	0.07853	3.03859e-132
JUND_MA0492.1	JUND	MA0492.1	C_FOSL1::JUN	60066	0.08772	17311	0.08777	16940	0.03307	2.37193e-93
KLF1_MA0493.2	KLF1	MA0493.2	C_KLF4	251713	0.13299	105924	0.14247	104930	-0.02723	1.96221e-113
Nr1h3Rxra_MA0494.1	Nr1h3::Rxra	MA0494.1	C_Nr1h3::Rxra	79719	0.07657	22220	0.07811	22997	-0.01991	9.26976e-74
MAFF_MA0495.3	MAFF	MA0495.3	C_MAFF	93315	0.07283	25224	0.07085	24298	0.04241	2.21343e-112
MAFK_MA0496.3	MAFK	MA0496.3	C_MAFK	119888	0.09603	45528	0.09377	44055	0.05904	1.84674e-135
MEF2C_MA0497.1	MEF2C	MA0497.1	C_MEF2A	142180	0.0738	36591	0.06842	32993	0.08227	5.03244e-147
MEIS1_MA0498.2	MEIS1	MA0498.2	C_MEIS1	49983	0.07662	13715	0.07636	13472	0.01526	6.75753e-55
MYOD1_MA0499.2	MYOD1	MA0499.2	C_MYOD1	147869	0.09122	53624	0.0924	53842	-0.00285	3.04822e-17
MYOG_MA0500.2	MYOG	MA0500.2	C_Tcf12	106739	0.09696	42118	0.09777	42097	0.00606	1.83087e-37
MAFNFE2_MA0501.1	MAF::NFE2	MA0501.1	C_MAFG::NFE2L1	98298	0.08847	34239	0.08549	32766	0.06343	1.59556e-129
NFYB_MA0502.2	NFYB	MA0502.2	C_NFYB	70768	0.12572	22935	0.13344	23096	-0.0171	1.22404e-68
NR2C2_MA0504.1	NR2C2	MA0504.1	C_NR2C2	153918	0.08554	45440	0.0904	47037	-0.04514	4.99522e-124
Nr5A2_MA0505.2	Nr5A2	MA0505.2	C_NR5A1	128332	0.06743	29329	0.0699	31621	-0.05725	1.01172e-131
Nrf1_MA0506.2	Nrf1	MA0506.2	C_Nrf1	73922	0.2134	45234	0.24742	46436	-0.24366	2.29662e-184
POU2F2_MA0507.2	POU2F2	MA0507.2	C_POU1F1	83440	0.06605	17976	0.06568	17778	0.00701	1.9223e-30
PRDM1_MA0508.3	PRDM1	MA0508.3	C_PRDM1	177561	0.0739	47148	0.0723	45507	0.04464	1.24373e-131
RFX1_MA0509.3	RFX1	MA0509.3	C_RFX3	41073	0.11592	16869	0.11356	15892	0.08241	2.43497e-120
RFX5_MA0510.2	RFX5	MA0510.2	C_RFX3	44980	0.11601	18443	0.11359	17372	0.08287	8.96595e-129
RUNX2_MA0511.2	RUNX2	MA0511.2	C_Bcl11B	37394	0.08151	10677	0.08256	10579	0.00413	3.09996e-10
Rxra_MA0512.2	Rxra	MA0512.2	C_NR2C2	82428	0.06503	16881	0.06734	18020	-0.04209	8.98118e-110
Sox3_MA0514.2	Sox3	MA0514.2	C_SOX13	72869	0.06611	15938	0.06647	16043	-0.00471	2.73711e-25
Sox6_MA0515.1	Sox6	MA0515.1	C_Sox6	129524	0.06317	26080	0.06378	26442	-0.01605	1.19682e-83
SP2_MA0516.3	SP2	MA0516.3	C_PATZ1	201593	0.1674	97284	0.18587	97383	-0.09221	1.19609e-161
STAT1STAT2_MA0517.1	STAT1::STAT2	MA0517.1	C_STAT1::STAT2	185159	0.06574	39637	0.06495	38392	0.01221	7.92804e-74
Stat4_MA0518.1	Stat4	MA0518.1	C_Stat4	124562	0.07899	34633	0.07729	33388	0.04633	7.68411e-121
Stat5aStat5b_MA0519.1	Stat5a::Stat5b	MA0519.1	C_Stat5b	113284	0.08041	32476	0.07862	31003	0.05419	5.1013e-122
Stat6_MA0520.1	Stat6	MA0520.1	C_Stat6	96233	0.07223	24508	0.07002	23347	0.0492	2.51542e-121
Tcf12_MA0521.2	Tcf12	MA0521.2	C_Tcf12	109557	0.09667	42898	0.09776	43020	-4e-05	0.841897
TCF3_MA0522.3	TCF3	MA0522.3	C_ASCL1	117415	0.11736	49510	0.12539	49867	-0.04781	9.58377e-121
TCF7L2_MA0523.1	TCF7L2	MA0523.1	C_Lef1	108999	0.06499	23716	0.06427	23437	0.01222	3.34544e-66
TFAP2C_MA0524.2	TFAP2C	MA0524.2	C_TFAP2A	80546	0.11603	33920	0.12652	34571	-0.08744	3.50705e-137
TP63_MA0525.2	TP63	MA0525.2	C_TP63	35488	0.07694	9091	0.0774	9167	0.01214	1.48758e-36
USF2_MA0526.4	USF2	MA0526.4	C_BHLHE41	23460	0.11838	8664	0.1254	8607	-0.00344	2.65735e-10
ZBTB33_MA0527.1	ZBTB33	MA0527.1	C_ZBTB33	20433	0.21303	12913	0.24776	13291	-0.28219	1.16914e-163
ZNF263_MA0528.2	ZNF263	MA0528.2	C_SP5	252236	0.11899	105290	0.12455	103169	0	0.134002
Bach1Mafk_MA0591.1	Bach1::Mafk	MA0591.1	C_MAFK	110421	0.09977	43311	0.09855	42126	0.04782	8.86032e-125
ESRRA_MA0592.3	ESRRA	MA0592.3	C_NR5A1	101700	0.06767	23621	0.06991	25302	-0.04634	7.61164e-120
FOXP2_MA0593.1	FOXP2	MA0593.1	C_FOXN3	112143	0.06138	21601	0.06367	23105	-0.06858	3.98042e-138
HOXA9_MA0594.2	HOXA9	MA0594.2	C_HOXA9	5929	0.09259	1728	0.09696	1775	-0.05062	3.99974e-66
SREBF1_MA0595.1	SREBF1	MA0595.1	C_SREBF1	69074	0.0908	23373	0.09116	23083	0.02698	1.81366e-86
SREBF2_MA0596.1	SREBF2	MA0596.1	C_SREBF1	73025	0.08433	23415	0.08348	23090	0.03109	1.7267e-95
THAP1_MA0597.2	THAP1	MA0597.2	C_THAP1	164869	0.1025	61626	0.10931	63332	-0.05762	1.29588e-139
EHF_MA0598.3	EHF	MA0598.3	C_Erg	164916	0.08906	49583	0.08975	48208	0.03318	6.82156e-112
KLF5_MA0599.1	KLF5	MA0599.1	C_KLF4	295781	0.13026	121790	0.13842	119933	-0.01025	3.08867e-84
RFX2_MA0600.2	RFX2	MA0600.2	C_RFX3	40599	0.11726	16797	0.11465	15815	0.08539	1.44404e-125
Arid3b_MA0601.1	Arid3b	MA0601.1	C_Arid3b	63452	0.04947	7452	0.05059	7599	-0.03627	3.03566e-97
Arid5a_MA0602.1	Arid5a	MA0602.1	C_Arid5a	38979	0.0525	5193	0.05293	5192	-0.0116	1.96076e-41
Arntl_MA0603.1	Arntl	MA0603.1	C_MYC	29155	0.12038	11619	0.12904	11678	-0.02499	3.68889e-65
Atf1_MA0604.1	Atf1	MA0604.1	C_Atf1	15857	0.17319	7073	0.18727	7010	-0.02426	6.59345e-49
ATF3_MA0605.2	ATF3	MA0605.2	C_FOSL1::JUN	23515	0.12212	8515	0.1273	8359	0.02073	5.89154e-58
Nfat5_MA0606.2	Nfat5	MA0606.2	C_Nfat5	139342	0.06588	30654	0.06421	29189	0.03675	1.4674e-108
BHLHA15_MA0607.2	BHLHA15	MA0607.2	C_ATOH7	39983	0.08872	14095	0.08693	13981	0.00525	8.36495e-15
Creb3l2_MA0608.1	Creb3l2	MA0608.1	C_Creb3l2	26247	0.12291	10665	0.12916	10495	0.00404	4.75613e-11
CREM_MA0609.2	CREM	MA0609.2	C_FOSL1::JUN	30044	0.12228	11174	0.12879	11273	0.00021	0.49603
DMRT3_MA0610.1	DMRT3	MA0610.1	C_DMRT3	47593	0.06446	10512	0.06367	10482	0.00788	2.46463e-29
Dux_MA0611.2	Dux	MA0611.2	C_Dux	36366	0.06527	7917	0.06399	7621	0.02465	3.97607e-68
EMX1_MA0612.2	EMX1	MA0612.2	C_ESX1	16857	0.06802	3680	0.07002	3859	-0.02809	4.89877e-62
FOXG1_MA0613.1	FOXG1	MA0613.1	C_FOXN3	83143	0.05753	13908	0.0603	15501	-0.08417	1.53282e-141
Foxj2_MA0614.1	Foxj2	MA0614.1	C_FOXN3	58381	0.05679	9227	0.05993	10428	-0.09393	3.18242e-135
Gmeb1_MA0615.1	Gmeb1	MA0615.1	C_Gmeb1	9308	0.18285	4778	0.20438	4852	-0.10853	7.5487e-100
HES2_MA0616.2	HES2	MA0616.2	C_MYC	34510	0.16342	16887	0.18471	17315	-0.13759	4.47091e-140
LBX1_MA0618.1	LBX1	MA0618.1	C_PAX4	44921	0.05983	8250	0.06031	8311	-0.01038	1.39667e-39
LIN54_MA0619.1	LIN54	MA0619.1	C_LIN54	84864	0.05716	14454	0.0562	13798	0.01294	6.74261e-58
MITF_MA0620.3	MITF	MA0620.3	C_BHLHE41	33681	0.09832	10803	0.10155	10807	0.01086	6.15208e-40
mix-a_MA0621.1	mix-a	MA0621.1	C_ARGFX	45696	0.05359	6633	0.05463	6810	-0.03044	7.80858e-82
Mlxip_MA0622.1	Mlxip	MA0622.1	C_MYC	36072	0.11063	14176	0.11462	14126	-0.00026	0.364733
NEUROG1_MA0623.2	NEUROG1	MA0623.2	C_ATOH7	34480	0.08513	11840	0.08254	11632	0.03115	2.66047e-77
Nfatc1_MA0624.2	Nfatc1	MA0624.2	C_Nfatc2	121370	0.07111	30010	0.06889	28432	0.04957	9.21837e-121
NFATC3_MA0625.2	NFATC3	MA0625.2	C_Nfatc2	71545	0.07744	19300	0.07572	18512	0.04789	5.0816e-107
Npas2_MA0626.1	Npas2	MA0626.1	C_MYC	33475	0.10764	13017	0.11136	13123	-0.01024	1.89181e-34
POU2F3_MA0627.2	POU2F3	MA0627.2	C_POU2F3	100473	0.06623	21992	0.06547	21650	0.01635	4.89675e-75
POU6F1_MA0628.1	POU6F1	MA0628.1	C_EMX2	22410	0.05678	3427	0.05916	3611	-0.04904	1.18004e-85
Rhox11_MA0629.1	Rhox11	MA0629.1	C_Rhox11	43714	0.07996	13189	0.0786	12821	0.03204	1.93908e-83
SHOX_MA0630.1	SHOX	MA0630.1	C_PAX4	35593	0.063	6549	0.06426	6627	-0.01855	2.03461e-57
Six3_MA0631.1	Six3	MA0631.1	C_Six3	34377	0.06707	7914	0.06686	8133	-0.00035	0.580294
TCFL5_MA0632.2	TCFL5	MA0632.2	C_TCFL5	35856	0.20559	21417	0.23937	22167	-0.26079	1.32936e-169
Twist2_MA0633.2	Twist2	MA0633.2	C_Tcf12	118036	0.09696	46291	0.09794	46415	0.00253	3.93155e-12
ALX3_MA0634.1	ALX3	MA0634.1	C_PAX4	45736	0.06153	8529	0.06215	8449	-0.00464	1.00831e-23
BARHL2_MA0635.1	BARHL2	MA0635.1	C_BARHL2	18079	0.07249	4563	0.07273	4606	0.00266	0.000136351
BHLHE41_MA0636.1	BHLHE41	MA0636.1	C_BHLHE41	22013	0.1231	8581	0.13249	8596	-0.02122	3.33913e-55
CREB3_MA0638.1	CREB3	MA0638.1	C_CREB3L4	24992	0.13007	9838	0.13885	9861	-0.01821	5.58243e-51
DBP_MA0639.1	DBP	MA0639.1	C_NFIL3	23094	0.09676	8072	0.08791	6946	0.19021	3.43761e-147
ELF3_MA0640.2	ELF3	MA0640.2	C_Erg	193736	0.08884	60449	0.08894	58919	0.03997	7.38976e-129
ELF4_MA0641.1	ELF4	MA0641.1	C_Erg	49279	0.13451	18198	0.14393	18157	-0.02722	1.75804e-84
EN2_MA0642.2	EN2	MA0642.2	C_DLX6	39786	0.06692	8057	0.06747	7980	0.00679	1.18165e-20
Esrrg_MA0643.1	Esrrg	MA0643.1	C_NR5A1	71421	0.06504	15615	0.06713	16557	-0.04033	9.04099e-108
ESX1_MA0644.2	ESX1	MA0644.2	C_ESX1	39568	0.06647	8030	0.06765	8108	-0.01286	3.21021e-45
ETV6_MA0645.1	ETV6	MA0645.1	C_Spi1	61834	0.12963	22733	0.13733	22376	0.00114	0.0640802
GCM1_MA0646.1	GCM1	MA0646.1	C_GCM2	51511	0.0989	19100	0.10224	19166	-0.01648	6.89339e-60
GRHL1_MA0647.1	GRHL1	MA0647.1	C_GRHL2	29174	0.0694	6836	0.06911	6764	0.00909	3.38271e-28
GSC_MA0648.1	GSC	MA0648.1	C_OTX2	31006	0.07372	7855	0.07333	7627	0.03197	5.16327e-71
HEY2_MA0649.1	HEY2	MA0649.1	C_MYC	36251	0.12188	15152	0.13143	15413	-0.04943	2.05468e-99
Hoxa13_MA0650.3	Hoxa13	MA0650.3	C_HOXB13	75435	0.05713	11985	0.05781	11962	-0.02515	8.0837e-86
HOXC11_MA0651.2	HOXC11	MA0651.2	C_HOXC10	19973	0.0651	4128	0.06595	4141	-0.02671	6.03495e-57
IRF8_MA0652.1	IRF8	MA0652.1	C_Irf1	48476	0.0754	12271	0.07585	11988	0.01352	8.39928e-50
IRF9_MA0653.1	IRF9	MA0653.1	C_Irf1	64719	0.06829	14151	0.06865	13978	-0.00093	0.15304
ISX_MA0654.1	ISX	MA0654.1	C_PAX4	42838	0.06198	7793	0.06298	7879	-0.01332	5.96429e-56
JDP2_MA0655.1	JDP2	MA0655.1	C_FOSL1::JUN	60143	0.09708	23698	0.09346	22619	0.07521	5.58398e-128
JDP2_MA0656.1	JDP2	MA0656.1	C_FOSL1::JUN	29940	0.11221	10253	0.11571	10055	0.02685	2.96598e-70
KLF13_MA0657.1	KLF13	MA0657.1	C_KLF13	62328	0.1402	25214	0.15064	25197	-0.02717	3.22301e-87
LHX6_MA0658.1	LHX6	MA0658.1	C_EMX2	26794	0.06046	4864	0.06227	4977	-0.03684	3.19253e-83
Mafg_MA0659.3	Mafg	MA0659.3	C_MAFK	126709	0.09195	45557	0.09039	44475	0.04361	7.63464e-125
MEF2B_MA0660.1	MEF2B	MA0660.1	C_MEF2A	67310	0.08016	19493	0.0742	17521	0.11073	4.6009e-148
MEOX1_MA0661.1	MEOX1	MA0661.1	C_EMX2	35277	0.06428	7394	0.06523	7562	-0.01183	8.87074e-44
MIXL1_MA0662.1	MIXL1	MA0662.1	C_PAX4	35869	0.06392	6899	0.06489	6926	-0.00871	1.65173e-30
MLX_MA0663.1	MLX	MA0663.1	C_MYC	22097	0.11903	8357	0.12667	8348	-0.01633	3.32012e-40
MLXIPL_MA0664.1	MLXIPL	MA0664.1	C_MYC	23069	0.11711	8815	0.12439	8796	-0.01361	3.72224e-39
MSC_MA0665.1	MSC	MA0665.1	C_MSC	110050	0.08776	38309	0.08724	38264	0.01617	1.80605e-71
MSX1_MA0666.2	MSX1	MA0666.2	C_DLX6	39206	0.06706	8174	0.06773	8087	0.00186	0.000247189
MYF6_MA0667.1	MYF6	MA0667.1	C_Tcf21	64318	0.07905	19717	0.07927	20002	-0.00756	1.28734e-37
Neurod2_MA0668.2	Neurod2	MA0668.2	C_Neurod2	156713	0.09872	63206	0.0981	63313	0.0072	7.30561e-45
NEUROG2_MA0669.1	NEUROG2	MA0669.1	C_ATOH7	57223	0.08862	20610	0.08672	20518	0.02295	1.37427e-74
NFIA_MA0670.1	NFIA	MA0670.1	C_NFIX	87488	0.08336	28523	0.08013	27082	0.07152	1.73559e-132
NFIX_MA0671.1	NFIX	MA0671.1	C_NFIX	94279	0.08969	33375	0.08733	31917	0.06358	2.81699e-136
NKX2-3_MA0672.1	NKX2-3	MA0672.1	C_NKX2-3	74018	0.07684	20860	0.07574	20580	0.02893	5.95218e-87
NKX2-8_MA0673.1	NKX2-8	MA0673.1	C_NKX2-3	64370	0.07689	18010	0.07592	17870	0.02832	6.42263e-89
NKX6-1_MA0674.1	NKX6-1	MA0674.1	C_LHX5	52155	0.05767	9190	0.05835	9485	-0.02679	2.09673e-79
NKX6-2_MA0675.1	NKX6-2	MA0675.1	C_LHX5	51985	0.05822	9138	0.05892	9396	-0.02364	2.26332e-70
Nr2e1_MA0676.1	Nr2e1	MA0676.1	C_Nr2e1	69409	0.06193	13629	0.06132	13415	0.01422	1.06761e-59
Nr2f6_MA0677.1	Nr2f6	MA0677.1	C_NR2C2	89555	0.06574	18801	0.06812	19934	-0.03934	4.47614e-103
OLIG2_MA0678.1	OLIG2	MA0678.1	C_ATOH7	33142	0.08516	11219	0.08254	10934	0.03266	2.07592e-81
ONECUT1_MA0679.2	ONECUT1	MA0679.2	C_ONECUT1	78011	0.04804	8847	0.04963	9331	-0.07018	1.58443e-129
Pax7_MA0680.2	Pax7	MA0680.2	C_Pax7	50992	0.04822	5920	0.04919	6105	-0.04467	2.39733e-103
PHOX2B_MA0681.2	PHOX2B	MA0681.2	C_PHOX2A	91801	0.04754	10154	0.04862	10251	-0.0467	6.81996e-120
PITX1_MA0682.2	PITX1	MA0682.2	C_OTX2	51062	0.06676	11124	0.067	11161	-0.00195	5.23362e-06
POU4F2_MA0683.1	POU4F2	MA0683.1	C_POU4F2	73476	0.05626	12057	0.05643	12134	-0.014	5.31712e-60
RUNX3_MA0684.2	RUNX3	MA0684.2	C_RUNX3	78118	0.07196	19555	0.07172	19424	0.01113	1.30227e-59
SP4_MA0685.2	SP4	MA0685.2	C_PATZ1	256846	0.14196	113520	0.15566	113924	-0.0734	2.62175e-155
SPDEF_MA0686.1	SPDEF	MA0686.1	C_SPDEF	28213	0.13299	11049	0.14251	11079	-0.04378	1.60569e-90
SPIC_MA0687.1	SPIC	MA0687.1	C_SPIC	103819	0.07309	24912	0.07279	24233	0.01839	1.92653e-77
TBX2_MA0688.1	TBX2	MA0688.1	C_TBX18	70879	0.08078	21934	0.07693	21022	0.06807	3.20625e-131
TBX20_MA0689.1	TBX20	MA0689.1	C_TBX18	75050	0.08213	23575	0.07803	22388	0.07742	8.82622e-135
TBX21_MA0690.2	TBX21	MA0690.2	C_TBX18	69666	0.08201	21966	0.07829	21128	0.06808	5.58791e-129
TFAP4_MA0691.1	TFAP4	MA0691.1	C_TFAP4	88738	0.09	32010	0.08922	31901	0.02276	1.27e-89
TFEB_MA0692.1	TFEB	MA0692.1	C_BHLHE41	47014	0.09964	15989	0.10262	15889	0.00746	3.27718e-29
Vdr_MA0693.3	Vdr	MA0693.3	C_Vdr	93888	0.06496	19944	0.06541	20515	-0.02041	1.17604e-83
ZBTB7B_MA0694.1	ZBTB7B	MA0694.1	C_ZBTB7B	56856	0.1003	20176	0.10685	20560	-0.05419	2.55891e-113
ZBTB7C_MA0695.1	ZBTB7C	MA0695.1	C_ZBTB7B	64739	0.10551	24521	0.11226	24748	-0.05129	2.9221e-109
ZIC1_MA0696.1	ZIC1	MA0696.1	C_ZIC5	103445	0.12582	47400	0.13607	47869	-0.07372	5.38606e-135
Zic3_MA0697.2	Zic3	MA0697.2	C_Zic2	208222	0.10673	84869	0.11024	84355	-0.00869	5.35792e-63
ZBTB18_MA0698.1	ZBTB18	MA0698.1	C_TWIST1	127463	0.07708	38195	0.07703	38712	-0.00109	0.000341312
LBX2_MA0699.1	LBX2	MA0699.1	C_PAX4	34143	0.06663	6910	0.06777	6915	-0.00493	3.67452e-11
LHX2_MA0700.2	LHX2	MA0700.2	C_DLX6	43432	0.06319	7976	0.06371	7921	-0.00032	0.273529
LHX9_MA0701.2	LHX9	MA0701.2	C_PAX4	35593	0.063	6549	0.06426	6628	-0.01855	2.03461e-57
LMX1A_MA0702.2	LMX1A	MA0702.2	C_ARGFX	33834	0.05526	5326	0.05648	5563	-0.03871	5.69237e-89
LMX1B_MA0703.2	LMX1B	MA0703.2	C_ARGFX	51455	0.05183	7183	0.05258	7349	-0.03386	7.12159e-96
Lhx4_MA0704.1	Lhx4	MA0704.1	C_ARGFX	27053	0.05222	3896	0.05301	3947	-0.03633	2.71044e-76
Lhx8_MA0705.1	Lhx8	MA0705.1	C_PAX4	34655	0.06347	6944	0.06463	7097	-0.01933	7.69178e-54
MEOX2_MA0706.1	MEOX2	MA0706.1	C_LHX5	43031	0.05896	7770	0.05992	8055	-0.02624	4.36209e-76
MNX1_MA0707.2	MNX1	MA0707.2	C_MNX1	38490	0.06357	7754	0.06349	7740	0.01093	3.66824e-36
MSX2_MA0708.2	MSX2	MA0708.2	C_DLX6	46789	0.06623	9640	0.06658	9503	0.00809	4.84276e-39
Msx3_MA0709.1	Msx3	MA0709.1	C_DLX6	39206	0.06706	8174	0.06773	8087	0.00188	0.000215827
NOTO_MA0710.1	NOTO	MA0710.1	C_EMX2	37175	0.066	8077	0.06694	8190	-0.01227	9.4176e-45
OTX1_MA0711.1	OTX1	MA0711.1	C_OTX2	31179	0.06493	6218	0.06625	6378	-0.03131	2.74207e-76
OTX2_MA0712.2	OTX2	MA0712.2	C_OTX2	63271	0.06455	13041	0.0644	12981	0.00432	1.2435e-13
PHOX2A_MA0713.1	PHOX2A	MA0713.1	C_PHOX2A	44893	0.05304	6343	0.05363	6344	-0.01865	3.20697e-57
PITX3_MA0714.1	PITX3	MA0714.1	C_OTX2	47965	0.06654	10151	0.06709	10163	-0.00605	2.25859e-31
PROP1_MA0715.1	PROP1	MA0715.1	C_PHOX2A	51834	0.04999	6348	0.05108	6424	-0.03965	2.51331e-98
PRRX1_MA0716.1	PRRX1	MA0716.1	C_PAX4	35593	0.063	6549	0.06426	6627	-0.01855	2.03461e-57
RAX2_MA0717.1	RAX2	MA0717.1	C_PAX4	35593	0.063	6549	0.06426	6627	-0.01855	2.03461e-57
RAX_MA0718.1	RAX	MA0718.1	C_GBX2	34222	0.06306	6401	0.0642	6459	-0.01818	6.85073e-57
RHOXF1_MA0719.1	RHOXF1	MA0719.1	C_OTX2	58274	0.06665	12802	0.06712	12965	-0.00942	2.08341e-40
Shox2_MA0720.1	Shox2	MA0720.1	C_PAX4	35593	0.063	6549	0.06426	6627	-0.01855	2.03461e-57
UNCX_MA0721.1	UNCX	MA0721.1	C_PAX4	35593	0.063	6549	0.06426	6627	-0.01855	2.03461e-57
VAX1_MA0722.1	VAX1	MA0722.1	C_ESX1	38164	0.06131	7244	0.06216	7442	-0.01694	3.64516e-52
VAX2_MA0723.2	VAX2	MA0723.2	C_ESX1	25933	0.0716	5860	0.0733	5991	-0.00997	1.02339e-26
VENTX_MA0724.1	VENTX	MA0724.1	C_VENTX	23856	0.06724	4958	0.06839	4958	-0.01139	1.01973e-34
VSX1_MA0725.1	VSX1	MA0725.1	C_PAX4	39571	0.0612	7561	0.06185	7652	-0.01188	2.13273e-42
VSX2_MA0726.1	VSX2	MA0726.1	C_PAX4	39571	0.0612	7561	0.06185	7652	-0.01188	2.13273e-42
NR3C2_MA0727.1	NR3C2	MA0727.1	C_Ar	46422	0.08279	14613	0.0845	15089	-0.02989	1.27356e-80
Nr2F6_MA0728.1	Nr2F6	MA0728.1	C_Nr2F6	83970	0.06344	16506	0.06539	17511	-0.04272	3.92601e-115
RARA_MA0729.1	RARA	MA0729.1	C_RARA	77694	0.06184	14783	0.06303	15403	-0.02967	2.66593e-95
RARA_MA0730.1	RARA	MA0730.1	C_RARA	76882	0.07368	20146	0.07611	20991	-0.03123	8.31566e-96
BCL6B_MA0731.1	BCL6B	MA0731.1	C_BCL6B	88286	0.07115	21779	0.07056	21561	0.0103	8.10706e-50
EGR3_MA0732.1	EGR3	MA0732.1	C_EGR1	103427	0.15794	53708	0.17407	53255	-0.08033	1.098e-142
EGR4_MA0733.1	EGR4	MA0733.1	C_EGR1	119360	0.13752	54219	0.1489	53714	-0.0462	1.23571e-119
Gli2_MA0734.3	Gli2	MA0734.3	C_Gli2	126996	0.10143	47945	0.10359	47717	0.0033	1.15708e-24
GLIS1_MA0735.1	GLIS1	MA0735.1	C_GLIS1	42001	0.10924	16103	0.117	16200	-0.05111	5.67323e-104
GLIS2_MA0736.1	GLIS2	MA0736.1	C_GLIS2	76587	0.11562	31335	0.1268	31984	-0.09055	6.16871e-135
GLIS3_MA0737.1	GLIS3	MA0737.1	C_GLIS2	60585	0.09767	21358	0.10143	21326	-0.01243	1.09963e-55
HIC2_MA0738.1	HIC2	MA0738.1	C_HIC2	87757	0.09323	30975	0.09513	30948	-0.00325	3.01109e-22
Hic1_MA0739.1	Hic1	MA0739.1	C_Hic1	94577	0.09118	33703	0.09023	32833	0.03786	9.3114e-108
KLF14_MA0740.2	KLF14	MA0740.2	C_KLF4	250834	0.14031	108493	0.15143	107453	-0.03572	9.23218e-122
KLF16_MA0741.1	KLF16	MA0741.1	C_KLF9	228030	0.1368	96883	0.14794	96119	-0.03864	3.51768e-125
KLF12_MA0742.2	KLF12	MA0742.2	C_PATZ1	222290	0.15507	103431	0.17375	104945	-0.12042	3.13468e-174
SCRT1_MA0743.2	SCRT1	MA0743.2	C_SCRT2	72824	0.08066	22069	0.08054	22155	0.00952	5.6736e-42
SCRT2_MA0744.2	SCRT2	MA0744.2	C_SCRT2	77883	0.08264	24014	0.08295	24217	0.00832	2.87797e-43
SNAI2_MA0745.2	SNAI2	MA0745.2	C_ASCL1	117950	0.08381	38400	0.08473	38638	-0.00069	0.379992
SP3_MA0746.2	SP3	MA0746.2	C_KLF9	191248	0.15461	86272	0.16934	85766	-0.05677	8.22488e-138
SP8_MA0747.1	SP8	MA0747.1	C_KLF9	200750	0.12962	81779	0.13913	81007	-0.02695	6.98851e-112
YY2_MA0748.2	YY2	MA0748.2	C_YY2	35810	0.18193	20387	0.20997	20723	-0.20965	3.58985e-159
ZBED1_MA0749.1	ZBED1	MA0749.1	C_ZBED1	5960	0.11124	2115	0.11695	2088	-0.00673	1.03723e-06
ZBTB7A_MA0750.2	ZBTB7A	MA0750.2	C_ETS1	91367	0.14467	39638	0.15724	39700	-0.05753	7.41193e-121
ZIC4_MA0751.1	ZIC4	MA0751.1	C_ZIC5	99486	0.13233	47402	0.14449	47868	-0.08954	1.57438e-142
ZNF410_MA0752.1	ZNF410	MA0752.1	C_ZNF410	46835	0.07005	10993	0.06837	10767	0.02817	3.23525e-77
ZNF740_MA0753.2	ZNF740	MA0753.2	C_ZNF740	206416	0.11413	80449	0.12174	80408	-0.03191	1.42029e-124
CUX1_MA0754.2	CUX1	MA0754.2	C_ONECUT1	15625	0.05355	2211	0.05515	2325	-0.04691	3.48702e-79
CUX2_MA0755.1	CUX2	MA0755.1	C_ONECUT1	13738	0.05361	1991	0.05492	2120	-0.04045	7.14002e-69
ONECUT2_MA0756.2	ONECUT2	MA0756.2	C_ONECUT2	11221	0.06359	2160	0.06546	2187	-0.03378	3.73735e-58
ONECUT3_MA0757.1	ONECUT3	MA0757.1	C_ONECUT1	66027	0.04831	7573	0.04988	8004	-0.06982	5.25878e-131
E2F7_MA0758.1	E2F7	MA0758.1	C_E2F7	39854	0.07877	10561	0.07903	10293	0.02072	2.21257e-61
ELK3_MA0759.2	ELK3	MA0759.2	C_ETS1	26842	0.21584	13510	0.24061	13633	-0.11726	2.01806e-133
ERF_MA0760.1	ERF	MA0760.1	C_ETS1	41310	0.13233	14858	0.14141	14887	-0.0206	4.17391e-66
ETV1_MA0761.2	ETV1	MA0761.2	C_Erg	185755	0.08935	57887	0.08986	56842	0.0266	1.90677e-107
ETV2_MA0762.1	ETV2	MA0762.1	C_ETS1	51133	0.10792	15823	0.11317	15799	-0.00511	3.36369e-25
ETV3_MA0763.1	ETV3	MA0763.1	C_ETS1	30425	0.15931	12105	0.17305	12232	-0.05473	2.24486e-95
ETV4_MA0764.3	ETV4	MA0764.3	C_ETS1	30955	0.19263	14321	0.21237	14440	-0.08422	1.75177e-113
ETV5_MA0765.3	ETV5	MA0765.3	C_ETS1	27298	0.1927	12472	0.21208	12610	-0.07914	6.27735e-114
GATA5_MA0766.2	GATA5	MA0766.2	C_Gata3	41811	0.0699	10271	0.06923	10178	0.01487	4.19983e-50
GCM2_MA0767.1	GCM2	MA0767.1	C_GCM2	41396	0.10302	15976	0.10548	15655	0.00309	3.82041e-10
Lef1_MA0768.2	Lef1	MA0768.2	C_Lef1	109937	0.06713	24581	0.06694	24645	0.00834	1.60971e-47
TCF7_MA0769.2	TCF7	MA0769.2	C_Lef1	87573	0.06532	19084	0.06461	18742	0.01838	2.42185e-72
HSF2_MA0770.1	HSF2	MA0770.1	C_HSF4	67665	0.07587	18245	0.0731	17099	0.06966	3.48231e-132
HSF4_MA0771.1	HSF4	MA0771.1	C_HSF4	59665	0.08123	17649	0.07852	16535	0.07828	4.54277e-129
IRF7_MA0772.1	IRF7	MA0772.1	C_IRF7	88912	0.06266	17622	0.06244	17060	-0.00419	1.17648e-23
MEF2D_MA0773.1	MEF2D	MA0773.1	C_MEF2A	77558	0.07676	21140	0.07141	19067	0.09516	1.82426e-145
MEIS2_MA0774.1	MEIS2	MA0774.1	C_MEIS2	107995	0.08834	36304	0.08824	35752	0.02298	1.69951e-89
MEIS3_MA0775.1	MEIS3	MA0775.1	C_MEIS2	87611	0.08614	28521	0.08613	28125	0.02121	5.07962e-81
MYBL1_MA0776.1	MYBL1	MA0776.1	C_MYBL1	10943	0.08	3011	0.08227	3022	-0.01637	1.77255e-35
MYBL2_MA0777.1	MYBL2	MA0777.1	C_MYBL2	10820	0.08456	3104	0.08688	3102	-0.01004	1.19506e-17
NFKB2_MA0778.1	NFKB2	MA0778.1	C_NFKB2	37755	0.09598	13614	0.10043	13735	-0.02735	8.71638e-78
PAX1_MA0779.1	PAX1	MA0779.1	C_PAX9	30834	0.10137	10902	0.10682	10986	-0.03404	2.81306e-75
PAX3_MA0780.1	PAX3	MA0780.1	C_Pax7	20308	0.05023	2518	0.05129	2581	-0.04392	8.91437e-81
PAX9_MA0781.1	PAX9	MA0781.1	C_PAX9	35149	0.0994	12271	0.10389	12373	-0.02511	8.06478e-67
PKNOX1_MA0782.2	PKNOX1	MA0782.2	C_PBX3	112042	0.08956	37162	0.08958	36400	0.0332	8.94177e-114
PKNOX2_MA0783.1	PKNOX2	MA0783.1	C_TGIF2LX	83250	0.0794	25839	0.07822	25661	0.02638	5.45352e-88
POU1F1_MA0784.2	POU1F1	MA0784.2	C_POU1F1	78240	0.06457	16054	0.06447	15924	0.0017	0.000208818
POU2F1_MA0785.1	POU2F1	MA0785.1	C_POU1F1	80701	0.0676	17794	0.06695	17363	0.02238	5.87567e-87
POU3F1_MA0786.1	POU3F1	MA0786.1	C_POU1F1	91471	0.06296	18071	0.06264	17798	0.00456	2.80042e-24
POU3F2_MA0787.1	POU3F2	MA0787.1	C_POU1F1	85615	0.06444	17686	0.06407	17404	0.00902	1.93259e-43
POU3F3_MA0788.1	POU3F3	MA0788.1	C_POU1F1	86776	0.06093	15966	0.06087	15761	0.00091	0.0681696
POU3F4_MA0789.1	POU3F4	MA0789.1	C_POU1F1	76672	0.06997	18187	0.06935	17993	0.01919	5.21409e-75
POU4F1_MA0790.1	POU4F1	MA0790.1	C_POU4F2	75292	0.05462	11678	0.05488	11774	-0.01744	4.74025e-71
POU4F3_MA0791.1	POU4F3	MA0791.1	C_POU4F2	70925	0.05513	11121	0.05546	11312	-0.01518	3.16594e-68
POU5F1B_MA0792.1	POU5F1B	MA0792.1	C_POU1F1	77404	0.06967	18191	0.06902	17852	0.02021	4.60659e-77
POU6F2_MA0793.1	POU6F2	MA0793.1	C_POU6F2	55156	0.06415	11701	0.06429	11899	-0.0057	2.99833e-20
PROX1_MA0794.1	PROX1	MA0794.1	C_PROX1	28434	0.08797	8670	0.0881	8457	0.02761	1.31998e-70
SMAD3_MA0795.1	SMAD3	MA0795.1	C_SMAD3	28576	0.08088	8459	0.08182	8523	0.00196	0.927053
TGIF1_MA0796.1	TGIF1	MA0796.1	C_TGIF2LX	73366	0.0778	22202	0.07685	22054	0.02061	2.08966e-80
TGIF2_MA0797.1	TGIF2	MA0797.1	C_TGIF2LX	71498	0.08015	22403	0.07915	22234	0.02444	5.63277e-83
RFX3_MA0798.3	RFX3	MA0798.3	C_RFX3	43601	0.11747	18043	0.11583	17062	0.07694	3.77411e-118
RFX4_MA0799.2	RFX4	MA0799.2	C_RFX4	31636	0.1147	12987	0.11623	12733	0.03354	8.26257e-77
EOMES_MA0800.1	EOMES	MA0800.1	C_TBX18	67986	0.08103	21156	0.07726	20285	0.06939	2.63562e-128
MGA_MA0801.1	MGA	MA0801.1	C_TBX4	59332	0.08837	20505	0.08529	19769	0.06419	3.29158e-120
TBR1_MA0802.1	TBR1	MA0802.1	C_TBX18	70428	0.07966	21552	0.07608	20677	0.06623	3.35712e-126
TBX15_MA0803.1	TBX15	MA0803.1	C_TBX4	86385	0.08726	28818	0.08375	27466	0.07658	7.8097e-138
TBX19_MA0804.1	TBX19	MA0804.1	C_TBXT	34052	0.07663	9656	0.07515	9631	0.02678	3.28818e-74
TBX1_MA0805.1	TBX1	MA0805.1	C_TBX4	65925	0.08467	21782	0.08112	20955	0.0697	1.88934e-122
TBX4_MA0806.1	TBX4	MA0806.1	C_TBX4	65925	0.08467	21782	0.08112	20955	0.0697	1.88934e-122
TBX5_MA0807.1	TBX5	MA0807.1	C_TBX4	88088	0.08287	27743	0.08014	26977	0.05558	4.11457e-124
TEAD3_MA0808.1	TEAD3	MA0808.1	C_TEAD4	61385	0.07916	18301	0.07733	17670	0.05011	1.73213e-108
TEAD4_MA0809.2	TEAD4	MA0809.2	C_TEAD4	96624	0.07764	28316	0.0754	27260	0.05423	6.81074e-126
TFAP2A_MA0810.1	TFAP2A	MA0810.1	C_TFAP2A	99966	0.12784	45457	0.1426	46617	-0.1282	9.52863e-163
TFAP2B_MA0811.1	TFAP2B	MA0811.1	C_TFAP2A	83727	0.11676	35344	0.12742	36002	-0.088	4.98801e-138
TFAP2B_MA0812.1	TFAP2B	MA0812.1	C_TFAP2C	78534	0.1237	34901	0.13621	35260	-0.0951	1.85399e-143
TFAP2B_MA0813.1	TFAP2B	MA0813.1	C_TFAP2A	73718	0.12384	32296	0.13596	32998	-0.09588	6.50064e-143
TFAP2C_MA0814.2	TFAP2C	MA0814.2	C_TFAP2C	145845	0.12686	65517	0.14022	66896	-0.10541	1.23351e-161
TFAP2C_MA0815.1	TFAP2C	MA0815.1	C_TFAP2A	65909	0.12876	29962	0.14288	30670	-0.11515	1.43728e-145
Ascl2_MA0816.1	Ascl2	MA0816.1	C_Tcf12	140925	0.09701	55540	0.09743	55257	0.01128	2.30554e-68
BHLHE23_MA0817.1	BHLHE23	MA0817.1	C_ATOH7	34336	0.08439	11543	0.0815	11302	0.03792	1.93286e-90
BHLHE22_MA0818.2	BHLHE22	MA0818.2	C_ATOH7	27475	0.092	10388	0.08892	10153	0.0378	1.02172e-80
CLOCK_MA0819.2	CLOCK	MA0819.2	C_MYC	43019	0.09146	14806	0.09241	15059	-0.00122	0.010655
FIGLA_MA0820.1	FIGLA	MA0820.1	C_Rbpjl	104134	0.08215	33188	0.08236	33493	0.0024	6.73608e-10
HES5_MA0821.2	HES5	MA0821.2	C_MYC	27611	0.13126	12264	0.14387	12615	-0.09347	2.59483e-117
HES7_MA0822.1	HES7	MA0822.1	C_HES7	31562	0.10754	12206	0.11382	12430	-0.03369	4.25736e-79
HEY1_MA0823.1	HEY1	MA0823.1	C_MYC	31945	0.12804	13926	0.13775	14156	-0.05086	8.37915e-93
MNT_MA0825.1	MNT	MA0825.1	C_MYC	33056	0.11124	12980	0.11613	13007	-0.01185	6.38839e-38
OLIG1_MA0826.1	OLIG1	MA0826.1	C_ATOH7	31756	0.08905	11570	0.08632	11385	0.03749	4.11076e-86
OLIG3_MA0827.1	OLIG3	MA0827.1	C_ATOH7	39158	0.08672	13571	0.08425	13251	0.03113	4.05597e-83
SREBF2_MA0828.2	SREBF2	MA0828.2	C_SREBF2	17845	0.10273	5559	0.1077	5557	0.00477	1.45357e-07
SREBF1_MA0829.2	SREBF1	MA0829.2	C_SREBF2	42239	0.0862	12449	0.08781	12549	0.01221	2.16097e-43
TCF4_MA0830.2	TCF4	MA0830.2	C_ASCL1	145256	0.10366	56926	0.10812	56943	-0.02019	7.00534e-89
TFE3_MA0831.3	TFE3	MA0831.3	C_BHLHE41	28649	0.10972	10165	0.11505	10171	-0.00452	7.87915e-10
Tcf21_MA0832.1	Tcf21	MA0832.1	C_Tcf21	72413	0.08962	25961	0.08956	26029	0.00702	8.49518e-32
ATF4_MA0833.2	ATF4	MA0833.2	C_CEBPG	52724	0.0738	13554	0.07149	12853	0.05822	2.44964e-109
ATF7_MA0834.1	ATF7	MA0834.1	C_FOSL1::JUN	21735	0.12129	7623	0.1268	7538	0.01506	2.43935e-42
BATF3_MA0835.2	BATF3	MA0835.2	C_FOSL1::JUN	89725	0.09845	35839	0.09489	34209	0.07062	1.38902e-134
CEBPD_MA0836.2	CEBPD	MA0836.2	C_CEBPB	48975	0.07414	12916	0.07127	12167	0.05848	4.51562e-118
CEBPE_MA0837.2	CEBPE	MA0837.2	C_CEBPB	7697	0.09368	2301	0.09233	2227	0.05911	1.31147e-72
CEBPG_MA0838.1	CEBPG	MA0838.1	C_CEBPB	14604	0.08801	4271	0.08632	4053	0.05447	1.12303e-89
CREB3L1_MA0839.1	CREB3L1	MA0839.1	C_CREB3L4	36391	0.10776	13405	0.11225	13345	-0.00491	2.01184e-16
Creb5_MA0840.1	Creb5	MA0840.1	C_FOSL1::JUN	29704	0.10989	9897	0.11277	9684	0.03932	6.69154e-82
NFE2_MA0841.1	NFE2	MA0841.1	C_NFE2	55321	0.09468	21206	0.09156	20270	0.06926	3.47526e-122
NRL_MA0842.2	NRL	MA0842.2	C_MAFF	62171	0.07861	18387	0.07734	17886	0.03106	1.29234e-91
TEF_MA0843.1	TEF	MA0843.1	C_NFIL3	23743	0.09058	7785	0.08273	6831	0.1637	6.10733e-141
XBP1_MA0844.1	XBP1	MA0844.1	C_XBP1	22887	0.11576	8499	0.12213	8559	-0.02085	3.67445e-50
FOXB1_MA0845.1	FOXB1	MA0845.1	C_FOXC2	100909	0.05226	14231	0.05368	15424	-0.05808	5.8459e-127
FOXC2_MA0846.1	FOXC2	MA0846.1	C_FOXC2	139737	0.05024	17646	0.05257	19597	-0.09636	2.32358e-153
FOXD2_MA0847.3	FOXD2	MA0847.3	C_FOXE1	126936	0.05446	19339	0.05609	20649	-0.07098	5.60499e-141
FOXO4_MA0848.1	FOXO4	MA0848.1	C_FOXN3	48756	0.06558	10321	0.06936	11509	-0.09387	1.45646e-126
FOXO6_MA0849.1	FOXO6	MA0849.1	C_FOXN3	48756	0.06558	10321	0.06936	11509	-0.09387	1.45646e-126
FOXP3_MA0850.1	FOXP3	MA0850.1	C_FOXN3	48756	0.06558	10321	0.06936	11509	-0.09387	1.45646e-126
Foxj3_MA0851.1	Foxj3	MA0851.1	C_FOXN3	108256	0.05281	15108	0.05582	17096	-0.10494	1.72021e-152
FOXK1_MA0852.2	FOXK1	MA0852.2	C_FOXN3	73463	0.06636	15791	0.06928	17231	-0.0747	6.73145e-131
Alx4_MA0853.1	Alx4	MA0853.1	C_Alx1	29058	0.05854	5038	0.05976	5145	-0.03279	2.72062e-81
Alx1_MA0854.1	Alx1	MA0854.1	C_Alx1	30791	0.05863	5312	0.0598	5444	-0.03002	1.98501e-81
RXRB_MA0855.1	RXRB	MA0855.1	C_NR2C2	83038	0.06484	16982	0.06701	18077	-0.03933	3.46667e-109
RXRG_MA0856.1	RXRG	MA0856.1	C_NR2C2	80290	0.06422	16239	0.06644	17251	-0.04048	5.79845e-108
Rarb_MA0857.1	Rarb	MA0857.1	C_Nr2F6	83671	0.06024	15176	0.06162	15967	-0.03162	5.80656e-96
Rarb_MA0858.1	Rarb	MA0858.1	C_RARA	72299	0.06977	17498	0.07132	18126	-0.02091	7.28334e-84
Rarg_MA0859.1	Rarg	MA0859.1	C_Nr2F6	76262	0.06079	13863	0.06238	14721	-0.03354	2.57477e-100
Rarg_MA0860.1	Rarg	MA0860.1	C_Rarg	83063	0.07206	21145	0.07376	21956	-0.02234	1.11085e-83
TP73_MA0861.1	TP73	MA0861.1	C_TP73	45496	0.08207	13028	0.08311	13156	0.0071	2.44188e-31
GMEB2_MA0862.1	GMEB2	MA0862.1	C_GMEB2	5727	0.1134	2003	0.11572	1993	0.02673	7.00552e-39
MTF1_MA0863.1	MTF1	MA0863.1	C_MTF1	53992	0.10523	21566	0.10758	21563	-0.00075	0.0118748
E2F2_MA0864.2	E2F2	MA0864.2	C_ZNF417	8876	0.16169	4525	0.17399	4524	-0.06114	5.73207e-80
E2F8_MA0865.2	E2F8	MA0865.2	C_E2F8	22589	0.15476	10985	0.16907	11042	-0.09332	2.517e-113
SOX21_MA0866.1	SOX21	MA0866.1	C_SOX21	66946	0.06375	13838	0.06305	13812	0.00745	4.00985e-32
SOX4_MA0867.2	SOX4	MA0867.2	C_SOX4	120443	0.06494	25106	0.06564	25608	-0.01519	2.88664e-78
SOX8_MA0868.2	SOX8	MA0868.2	C_Sox17	66918	0.06144	12727	0.06209	12867	-0.01588	2.28118e-64
Sox11_MA0869.2	Sox11	MA0869.2	C_SOX4	162961	0.0688	38285	0.06885	38450	-0.00212	9.70577e-15
Sox1_MA0870.1	Sox1	MA0870.1	C_SOX21	54693	0.06515	11717	0.06458	11731	0.01062	1.9357e-43
TFEC_MA0871.2	TFEC	MA0871.2	C_MYC	46085	0.10943	17099	0.11432	17046	-0.00049	0.00492951
TFAP2A_MA0872.1	TFAP2A	MA0872.1	C_TFAP2A	69699	0.13003	32050	0.14407	32793	-0.11798	5.0736e-144
HOXD12_MA0873.1	HOXD12	MA0873.1	C_HOXC10	18969	0.06361	3825	0.06475	3874	-0.02956	7.79777e-63
Arx_MA0874.1	Arx	MA0874.1	C_Alx1	27634	0.05878	4514	0.06049	4648	-0.03259	4.96918e-73
BARX1_MA0875.1	BARX1	MA0875.1	C_TLX2	38168	0.06719	8199	0.06796	8185	-0.0005	0.300605
BSX_MA0876.1	BSX	MA0876.1	C_DLX6	37252	0.069	7964	0.07	8085	-0.01093	5.78564e-38
BARHL1_MA0877.3	BARHL1	MA0877.3	C_BARHL1	10224	0.07851	2892	0.07934	2868	-0.00333	0.0272616
CDX1_MA0878.3	CDX1	MA0878.3	C_HOXA10	55576	0.06074	10436	0.0607	10365	-0.00454	7.97304e-22
DLX1_MA0879.2	DLX1	MA0879.2	C_Dlx2	44156	0.06846	9755	0.0686	9593	0.01773	1.02701e-59
Dlx3_MA0880.1	Dlx3	MA0880.1	C_DLX6	29877	0.06539	6136	0.06512	6012	0.01558	5.68718e-47
Dlx4_MA0881.1	Dlx4	MA0881.1	C_DLX6	29877	0.06539	6136	0.06512	6012	0.01558	5.68718e-47
DLX6_MA0882.1	DLX6	MA0882.1	C_DLX6	30346	0.06651	6409	0.06697	6416	0.00138	0.000486047
Dmbx1_MA0883.1	Dmbx1	MA0883.1	C_Dmbx1	29853	0.07009	7063	0.06904	6896	0.02909	6.96693e-73
DUXA_MA0884.2	DUXA	MA0884.2	C_DUXA	25493	0.0602	4620	0.06049	4598	-0.00942	7.0859e-29
Dlx2_MA0885.2	Dlx2	MA0885.2	C_Dlx2	47770	0.06682	10533	0.06704	10423	0.01609	1.34437e-57
EMX2_MA0886.1	EMX2	MA0886.1	C_EMX2	25143	0.06605	5240	0.06786	5389	-0.01885	1.19746e-51
EVX1_MA0887.1	EVX1	MA0887.1	C_EVX2	26971	0.07096	6496	0.07229	6547	-0.00783	4.39937e-20
EVX2_MA0888.1	EVX2	MA0888.1	C_EVX2	27055	0.07046	6439	0.07181	6496	-0.00889	5.59791e-28
GBX1_MA0889.1	GBX1	MA0889.1	C_GBX2	27717	0.07074	6080	0.07238	6155	-0.00552	1.96061e-17
GBX2_MA0890.1	GBX2	MA0890.1	C_GBX2	34795	0.06888	7379	0.07043	7521	-0.01061	3.92147e-33
GSC2_MA0891.1	GSC2	MA0891.1	C_OTX2	44642	0.06591	9386	0.06632	9466	-0.01203	2.87702e-46
GSX1_MA0892.1	GSX1	MA0892.1	C_PAX4	41513	0.06278	8017	0.06399	8263	-0.02095	7.83496e-71
GSX2_MA0893.2	GSX2	MA0893.2	C_ESX1	39167	0.06856	9029	0.06954	9227	-0.01256	4.9986e-40
HESX1_MA0894.1	HESX1	MA0894.1	C_GBX2	32229	0.06588	6586	0.06677	6604	-0.00457	1.24604e-13
HMBOX1_MA0895.1	HMBOX1	MA0895.1	C_HMBOX1	30684	0.07168	7303	0.07152	7313	0.00628	3.58352e-20
Hmx1_MA0896.1	Hmx1	MA0896.1	C_Hmx3	42099	0.06286	8535	0.06283	8490	0.00591	9.82305e-22
Hmx2_MA0897.1	Hmx2	MA0897.1	C_Hmx3	50568	0.05884	8868	0.05889	8890	-0.0079	8.52664e-34
Hmx3_MA0898.1	Hmx3	MA0898.1	C_Hmx3	50845	0.05755	8686	0.05759	8688	-0.00544	1.85012e-21
HOXA10_MA0899.1	HOXA10	MA0899.1	C_HOXA10	69890	0.0557	11273	0.05603	11266	-0.02653	1.33493e-76
HOXA2_MA0900.2	HOXA2	MA0900.2	C_ESX1	16857	0.06802	3680	0.07002	3859	-0.02805	5.57269e-62
HOXB13_MA0901.2	HOXB13	MA0901.2	C_HOXB13	105184	0.05185	13835	0.05262	13811	-0.04119	4.62306e-112
HOXB2_MA0902.2	HOXB2	MA0902.2	C_ESX1	23668	0.06857	5340	0.07015	5522	-0.02035	1.37923e-52
HOXB3_MA0903.1	HOXB3	MA0903.1	C_EMX2	42195	0.06769	9287	0.06889	9517	-0.01294	7.97418e-50
HOXB5_MA0904.2	HOXB5	MA0904.2	C_ESX1	16857	0.06802	3680	0.07002	3859	-0.02806	5.3959e-62
HOXC10_MA0905.1	HOXC10	MA0905.1	C_HOXC10	33468	0.05947	6096	0.05997	6182	-0.02133	1.48074e-59
HOXC12_MA0906.1	HOXC12	MA0906.1	C_HOXC10	23837	0.06207	4642	0.06263	4627	-0.0217	6.05203e-57
HOXC13_MA0907.1	HOXC13	MA0907.1	C_HOXC13	37768	0.06472	8081	0.06508	8057	-0.01186	1.25395e-40
HOXD11_MA0908.1	HOXD11	MA0908.1	C_HOXC10	23667	0.06121	4535	0.06158	4485	-0.01862	6.5001e-48
Hoxd13_MA0909.3	Hoxd13	MA0909.3	C_CDX2	67742	0.05677	10477	0.05757	10716	-0.02285	1.37428e-76
HOXD8_MA0910.2	HOXD8	MA0910.2	C_HOXB8	40531	0.06586	8870	0.06592	8872	0.00861	1.93961e-30
Hoxa11_MA0911.1	Hoxa11	MA0911.1	C_HOXC10	21330	0.06312	4282	0.06392	4337	-0.02685	1.88257e-61
HOXD3_MA0912.2	HOXD3	MA0912.2	C_ESX1	40565	0.0636	8192	0.06481	8484	-0.02413	1.11882e-75
HOXD9_MA0913.2	HOXD9	MA0913.2	C_HOXA10	58953	0.05753	10336	0.05759	10295	-0.0118	1.63115e-47
ISL2_MA0914.1	ISL2	MA0914.1	C_ISL2	47914	0.07127	12140	0.07069	12054	0.01713	8.04078e-57
HES1_MA1099.2	HES1	MA1099.2	C_MYC	35770	0.18964	20210	0.21782	20664	-0.19366	4.75255e-153
ASCL1_MA1100.2	ASCL1	MA1100.2	C_Tcf12	109165	0.09844	43911	0.09939	43693	0.00949	2.36747e-49
BACH2_MA1101.2	BACH2	MA1101.2	C_NFE2	52782	0.10059	21864	0.09679	20803	0.07899	8.54036e-129
CTCFL_MA1102.2	CTCFL	MA1102.2	C_CTCFL	143165	0.14795	72071	0.16369	73071	-0.11592	2.95586e-167
FOXK2_MA1103.2	FOXK2	MA1103.2	C_FOXN3	73265	0.06216	14215	0.06537	15730	-0.09164	2.69479e-137
GATA6_MA1104.2	GATA6	MA1104.2	C_Gata3	59714	0.06332	12482	0.06174	12171	0.02798	2.38581e-84
GRHL2_MA1105.2	GRHL2	MA1105.2	C_GRHL2	76105	0.07395	20016	0.07312	19891	0.01852	7.20953e-70
HIF1A_MA1106.1	HIF1A	MA1106.1	C_ARNT::HIF1A	24332	0.11574	10049	0.12342	10246	-0.04611	3.51487e-86
KLF9_MA1107.2	KLF9	MA1107.2	C_KLF9	284622	0.11311	110228	0.11859	109022	-0.00761	5.29547e-63
MXI1_MA1108.2	MXI1	MA1108.2	C_MXI1	125352	0.07684	36113	0.07568	36709	0.00804	1.12305e-46
NEUROD1_MA1109.1	NEUROD1	MA1109.1	C_Neurod2	157141	0.09934	63630	0.09874	63638	0.00915	1.77407e-58
Nr1H4_MA1110.2	Nr1H4	MA1110.2	C_Nr1H2	105718	0.06775	24076	0.0708	26303	-0.05647	9.22522e-129
NR2F2_MA1111.1	NR2F2	MA1111.1	C_Nr1H2	82963	0.06146	15940	0.06363	17339	-0.0473	1.11808e-112
NR4A1_MA1112.2	NR4A1	MA1112.2	C_NR4A1	104692	0.06415	21516	0.06434	21642	0.00382	5.98049e-22
PBX2_MA1113.2	PBX2	MA1113.2	C_MEIS2	59641	0.05999	11158	0.06011	11092	-0.00605	2.14062e-26
PBX3_MA1114.1	PBX3	MA1114.1	C_PBX3	135325	0.09421	47250	0.09496	46743	0.02329	3.56694e-98
POU5F1_MA1115.1	POU5F1	MA1115.1	C_POU2F3	98310	0.06946	23443	0.0687	23055	0.01543	9.77195e-66
RBPJ_MA1116.1	RBPJ	MA1116.1	C_RBPJ	172193	0.08914	56554	0.08729	54284	0.05531	3.12522e-141
RELB_MA1117.1	RELB	MA1117.1	C_RELB	67850	0.08819	21645	0.09001	21293	0.00763	3.89519e-37
SIX1_MA1118.1	SIX1	MA1118.1	C_SIX1	62195	0.07273	15937	0.07207	15540	0.02536	3.15429e-86
SIX2_MA1119.1	SIX2	MA1119.1	C_SIX2	80740	0.07376	21452	0.07284	21160	0.02296	7.17235e-79
SOX13_MA1120.1	SOX13	MA1120.1	C_SOX13	72879	0.06538	15620	0.06581	15680	-0.00657	3.02232e-32
TEAD2_MA1121.1	TEAD2	MA1121.1	C_TEAD4	83114	0.08122	25604	0.07928	24618	0.056	3.56945e-122
TFDP1_MA1122.1	TFDP1	MA1122.1	C_E2F6	63921	0.18954	37684	0.21517	38183	-0.1915	2.10356e-169
TWIST1_MA1123.2	TWIST1	MA1123.2	C_TWIST1	127669	0.08302	42138	0.08275	42584	0.00102	0.00111688
ZNF24_MA1124.1	ZNF24	MA1124.1	C_ZNF24	82360	0.06656	18714	0.06596	18235	0.01442	5.75465e-63
ZNF384_MA1125.1	ZNF384	MA1125.1	C_ZNF384	219828	0.05399	32854	0.05464	32860	-0.05791	4.11518e-141
FOSJUN_MA1126.1	FOS::JUN	MA1126.1	C_FOSL1::JUN	36136	0.10119	11450	0.10326	11421	0.02531	1.12069e-64
FOSBJUN_MA1127.1	FOSB::JUN	MA1127.1	C_FOSL1::JUN	30570	0.11296	10459	0.11622	10226	0.03396	2.26622e-84
FOSL1JUN_MA1128.1	FOSL1::JUN	MA1128.1	C_FOSL1::JUN	77799	0.10734	34239	0.10377	32564	0.07854	7.89651e-129
FOSL1JUN_MA1129.1	FOSL1::JUN	MA1129.1	C_FOSL1::JUN	20385	0.11853	6971	0.12334	6802	0.02823	2.83702e-58
FOSL2JUN_MA1130.1	FOSL2::JUN	MA1130.1	C_FOSL1::JUN	70253	0.10832	31223	0.10469	29748	0.07772	7.3589e-134
FOSL2JUN_MA1131.1	FOSL2::JUN	MA1131.1	C_FOSL1::JUN	36698	0.10569	11908	0.10881	11722	0.02112	1.71282e-66
JUNJUNB_MA1132.1	JUN::JUNB	MA1132.1	C_FOSL1::JUN	60867	0.10785	26067	0.10515	25045	0.06865	1.36523e-128
JUNJUNB_MA1133.1	JUN::JUNB	MA1133.1	C_FOSL1::JUN	33837	0.11036	11422	0.11433	11376	0.01644	2.24681e-58
FOSJUNB_MA1134.1	FOS::JUNB	MA1134.1	C_FOSL1::JUN	65549	0.10781	29276	0.10392	27942	0.07977	1.29687e-134
FOSBJUNB_MA1135.1	FOSB::JUNB	MA1135.1	C_FOSL1::JUN	68463	0.10616	30143	0.10234	28749	0.07844	2.67644e-132
FOSBJUNB_MA1136.1	FOSB::JUNB	MA1136.1	C_FOSL1::JUN	22689	0.11742	7736	0.12214	7594	0.02358	7.97749e-63
FOSL1JUNB_MA1137.1	FOSL1::JUNB	MA1137.1	C_FOSL1::JUN	70272	0.10691	31018	0.10312	29525	0.07819	1.51673e-127
FOSL2JUNB_MA1138.1	FOSL2::JUNB	MA1138.1	C_FOSL1::JUN	66573	0.10535	29035	0.10144	27575	0.08215	6.34336e-138
FOSL2JUNB_MA1139.1	FOSL2::JUNB	MA1139.1	C_FOSL1::JUN	23260	0.11659	8030	0.12068	7920	0.0282	2.20831e-67
JUNB_MA1140.2	JUNB	MA1140.2	C_FOSL1::JUN	23022	0.12668	8428	0.13315	8378	0.00781	9.23209e-22
FOSJUND_MA1141.1	FOS::JUND	MA1141.1	C_FOSL1::JUN	77052	0.10815	34168	0.10458	32542	0.07802	2.64658e-137
FOSL1JUND_MA1142.1	FOSL1::JUND	MA1142.1	C_FOSL1::JUN	70965	0.10568	30626	0.10212	29208	0.07709	8.2503e-127
FOSL1JUND_MA1143.1	FOSL1::JUND	MA1143.1	C_FOSL1::JUND	26499	0.12012	9230	0.12476	9086	0.02732	2.8793e-71
FOSL2JUND_MA1144.1	FOSL2::JUND	MA1144.1	C_FOSL1::JUN	66554	0.10721	29534	0.10344	28091	0.08113	2.38987e-135
FOSL2JUND_MA1145.1	FOSL2::JUND	MA1145.1	C_FOSL1::JUN	33139	0.11387	11437	0.11747	11282	0.0297	2.05084e-79
NR1H4RXRA_MA1146.1	NR1H4::RXRA	MA1146.1	C_NR2F1	41851	0.07619	11016	0.07982	11416	-0.04722	3.91816e-104
NR4A2RXRA_MA1147.1	NR4A2::RXRA	MA1147.1	C_NR2F1	39773	0.07914	10867	0.08403	11249	-0.05886	1.65497e-107
PPARARXRA_MA1148.1	PPARA::RXRA	MA1148.1	C_PPARA::RXRA	87981	0.06928	20342	0.07067	20865	-0.01493	3.23912e-66
RARARXRG_MA1149.1	RARA::RXRG	MA1149.1	C_RARA::RXRG	85824	0.08444	25589	0.08957	26550	-0.05162	5.73191e-116
RORB_MA1150.1	RORB	MA1150.1	C_RORB	58594	0.0667	13582	0.06798	14095	-0.02726	2.04418e-84
RORC_MA1151.1	RORC	MA1151.1	C_RORB	56594	0.06991	14136	0.07053	14471	-0.01338	1.15525e-58
SOX15_MA1152.1	SOX15	MA1152.1	C_SOX15	128247	0.05517	19850	0.05651	20547	-0.05248	1.8932e-129
Smad4_MA1153.1	Smad4	MA1153.1	C_Smad4	59911	0.08433	19185	0.08354	18703	0.02963	7.49331e-89
ZNF282_MA1154.1	ZNF282	MA1154.1	C_ZNF282	77327	0.08115	22783	0.08113	22463	0.01719	5.01471e-64
ZSCAN4_MA1155.1	ZSCAN4	MA1155.1	C_ZSCAN4	160202	0.07488	44119	0.07438	44632	0.00375	1.6691e-28
IRF3_MA1418.1	IRF3	MA1418.1	C_IRF3	107879	0.07069	25357	0.07036	24808	0.01278	7.47481e-62
IRF4_MA1419.1	IRF4	MA1419.1	C_Irf1	44223	0.07356	10793	0.0741	10597	0.00861	5.51789e-36
IRF5_MA1420.1	IRF5	MA1420.1	C_IRF5	40455	0.08023	10851	0.08149	10698	0.00016	0.967269
TCF7L1_MA1421.1	TCF7L1	MA1421.1	C_TCF7L1	102856	0.06516	22205	0.06472	21909	0.01135	4.16155e-55
ARGFX_MA1463.1	ARGFX	MA1463.1	C_ARGFX	40670	0.05592	6566	0.05655	6587	-0.02909	3.81249e-76
ARNT2_MA1464.1	ARNT2	MA1464.1	C_MYC	28469	0.1206	11591	0.12855	11589	-0.02065	4.61217e-53
ATF6_MA1466.1	ATF6	MA1466.1	C_CREB3L4	34454	0.10843	12524	0.11337	12574	-0.00995	3.59416e-32
Atoh1_MA1467.2	Atoh1	MA1467.2	C_Neurod2	132849	0.09704	52835	0.09555	52560	0.01998	5.75856e-94
ATOH7_MA1468.1	ATOH7	MA1468.1	C_ATOH7	68916	0.08702	24010	0.08536	23731	0.01331	1.1141e-58
BACH2_MA1470.1	BACH2	MA1470.1	C_BACH2	26897	0.08414	7201	0.08529	7090	0.02339	1.01774e-59
BARX2_MA1471.1	BARX2	MA1471.1	C_BARX2	52559	0.05423	7567	0.0551	7700	-0.01903	5.30058e-65
Bhlha15_MA1472.2	Bhlha15	MA1472.2	C_Tcf12	107718	0.09565	41706	0.0965	41893	0.00222	1.20738e-10
CDX4_MA1473.1	CDX4	MA1473.1	C_HOXA10	58677	0.05862	10430	0.05863	10444	-0.00799	6.52872e-35
CREB3L4_MA1474.1	CREB3L4	MA1474.1	C_CREB3L4	32740	0.13615	13932	0.14755	13992	-0.04615	7.55699e-92
CREB3L4_MA1475.1	CREB3L4	MA1475.1	C_FOSL1::JUN	17585	0.16817	7934	0.18127	7876	-0.00779	6.85353e-20
Dlx5_MA1476.2	Dlx5	MA1476.2	C_Dlx2	46897	0.06587	10210	0.06602	10165	0.01597	6.74123e-52
DMRTA2_MA1478.1	DMRTA2	MA1478.1	C_DMRTA1	48039	0.06391	10123	0.06285	10004	0.02238	6.92909e-71
DMRTC2_MA1479.1	DMRTC2	MA1479.1	C_DMRTA1	54735	0.06273	11268	0.06189	11006	0.01784	1.39487e-65
DPRX_MA1480.1	DPRX	MA1480.1	C_DPRX	31917	0.07873	8995	0.07734	8714	0.04899	5.86463e-93
DRGX_MA1481.1	DRGX	MA1481.1	C_ESX1	25080	0.07294	5647	0.07448	5705	-0.00525	5.71924e-15
ELF2_MA1483.2	ELF2	MA1483.2	C_Erg	54434	0.12407	18635	0.13172	18654	-0.01581	8.17269e-62
ETS2_MA1484.1	ETS2	MA1484.1	C_ETS1	46869	0.14471	18687	0.1558	18752	-0.03723	1.91059e-91
FERD3L_MA1485.1	FERD3L	MA1485.1	C_FERD3L	81447	0.10598	34349	0.10864	34418	-0.01306	1.56264e-60
FOXE1_MA1487.2	FOXE1	MA1487.2	C_FOXE1	141090	0.05391	21192	0.05557	22583	-0.07408	1.71891e-144
FOXN3_MA1489.1	FOXN3	MA1489.1	C_FOXN3	12965	0.05992	2170	0.06451	2515	-0.11889	2.85527e-113
GLI3_MA1491.2	GLI3	MA1491.2	C_GLI3	77898	0.10185	29394	0.10364	28949	0.01389	1.26998e-60
HES6_MA1493.1	HES6	MA1493.1	C_HES6	39775	0.09788	14378	0.10136	14347	-0.00549	1.28882e-18
HNF4A_MA1494.1	HNF4A	MA1494.1	C_HNF4A	64811	0.06804	14228	0.06999	14910	-0.03169	1.59259e-88
HOXA1_MA1495.1	HOXA1	MA1495.1	C_ESX1	16857	0.06802	3680	0.07002	3859	-0.02806	5.3959e-62
HOXA4_MA1496.1	HOXA4	MA1496.1	C_HOXD4	39596	0.0633	8141	0.06376	8236	-0.0123	2.09141e-43
HOXA6_MA1497.1	HOXA6	MA1497.1	C_HOXB7	32532	0.06542	6865	0.06689	7154	-0.01525	9.28844e-54
HOXA7_MA1498.2	HOXA7	MA1498.2	C_HOXB8	38051	0.06376	7899	0.06393	7911	0.00666	4.81055e-26
HOXB4_MA1499.1	HOXB4	MA1499.1	C_HOXD4	39871	0.05756	6887	0.05824	7050	-0.02484	7.17054e-75
HOXB6_MA1500.1	HOXB6	MA1500.1	C_HOXB6	38165	0.06019	7254	0.06073	7347	-0.01091	8.87655e-42
HOXB7_MA1501.1	HOXB7	MA1501.1	C_HOXB7	33530	0.06586	7168	0.06688	7385	-0.01317	1.66473e-40
HOXB8_MA1502.1	HOXB8	MA1502.1	C_HOXB8	40531	0.06586	8870	0.06592	8872	0.00863	1.64581e-30
HOXB9_MA1503.1	HOXB9	MA1503.1	C_HOXC10	25309	0.06113	4814	0.06165	4881	-0.01893	2.03504e-54
HOXC4_MA1504.1	HOXC4	MA1504.1	C_HOXD4	38332	0.06325	7920	0.06376	8048	-0.01442	1.21538e-49
HOXC8_MA1505.1	HOXC8	MA1505.1	C_LHX5	23488	0.06136	4505	0.0621	4675	-0.02351	1.51815e-64
HOXD10_MA1506.1	HOXD10	MA1506.1	C_HOXC10	24924	0.06346	4923	0.06419	5000	-0.01862	6.81692e-52
HOXD4_MA1507.1	HOXD4	MA1507.1	C_HOXD4	34694	0.06152	6756	0.06231	6933	-0.01745	5.58909e-51
IKZF1_MA1508.1	IKZF1	MA1508.1	C_IKZF1	211021	0.07766	58471	0.07687	56866	0.03093	2.19841e-115
IRF6_MA1509.1	IRF6	MA1509.1	C_IRF6	13396	0.0904	4174	0.09312	4092	0.00175	0.00816921
KLF10_MA1511.2	KLF10	MA1511.2	C_KLF4	231095	0.1475	103941	0.16323	104695	-0.08874	4.65584e-162
KLF11_MA1512.1	KLF11	MA1512.1	C_KLF9	179340	0.14731	80849	0.15847	79219	-0.01959	1.0186e-94
KLF15_MA1513.1	KLF15	MA1513.1	C_PATZ1	164551	0.1974	94723	0.22974	97169	-0.2456	2.38629e-204
KLF17_MA1514.1	KLF17	MA1514.1	C_KLF17	183720	0.10608	70293	0.10993	69603	-0.00262	1.87174e-18
KLF2_MA1515.1	KLF2	MA1515.1	C_KLF9	173192	0.14882	77250	0.16381	77317	-0.0717	5.95612e-150
KLF3_MA1516.1	KLF3	MA1516.1	C_KLF3	97950	0.16592	47717	0.18619	48292	-0.12311	1.52236e-157
KLF6_MA1517.1	KLF6	MA1517.1	C_KLF9	135845	0.14539	59917	0.15835	59573	-0.04771	1.56906e-127
Lhx1_MA1518.2	Lhx1	MA1518.2	C_Lhx1	24830	0.07072	5895	0.07153	5918	-0.00542	8.12317e-17
LHX5_MA1519.1	LHX5	MA1519.1	C_LHX5	39682	0.05882	7107	0.05992	7391	-0.03118	5.57755e-85
MAF_MA1520.1	MAF	MA1520.1	C_MAFA	56189	0.09449	21071	0.09324	20431	0.04926	1.77931e-109
MAFA_MA1521.1	MAFA	MA1521.1	C_MAFA	58214	0.10348	23665	0.10438	23162	0.02821	2.07596e-83
MAZ_MA1522.1	MAZ	MA1522.1	C_PATZ1	231706	0.13492	100561	0.14909	102279	-0.09631	2.49577e-170
MSANTD3_MA1523.1	MSANTD3	MA1523.1	C_MSANTD3	87917	0.08868	29684	0.08938	29715	0.0049	3.73449e-27
Msgn1_MA1524.2	Msgn1	MA1524.2	C_Msgn1	107178	0.08247	33259	0.08182	33218	0.00745	4.25489e-44
NFATC4_MA1525.2	NFATC4	MA1525.2	C_Nfatc2	78089	0.07318	19600	0.07132	18740	0.04769	9.13068e-109
NFIC_MA1527.1	NFIC	MA1527.1	C_NFIB	84759	0.09506	31316	0.09556	30547	0.02242	3.83152e-83
NFIX_MA1528.1	NFIX	MA1528.1	C_NFIB	99730	0.10142	39305	0.1036	38564	0.00746	5.47558e-43
NHLH2_MA1529.1	NHLH2	MA1529.1	C_NHLH2	98966	0.11543	43758	0.12162	44094	-0.04087	2.25568e-109
NKX6-3_MA1530.1	NKX6-3	MA1530.1	C_NKX6-3	51036	0.05923	9414	0.0596	9643	-0.01543	6.79679e-59
NR1D1_MA1531.1	NR1D1	MA1531.1	C_NR1D1	72368	0.08036	20958	0.08255	21746	-0.02793	2.93207e-79
NR1D2_MA1532.2	NR1D2	MA1532.2	C_NR1D1	71645	0.0753	19007	0.0763	19610	-0.01075	6.7822e-49
NR1I2_MA1533.1	NR1I2	MA1533.1	C_NR1I2	51419	0.08771	16358	0.09301	17006	-0.06238	1.76322e-114
NR1I3_MA1534.1	NR1I3	MA1534.1	C_Vdr	60894	0.06264	12350	0.06258	12432	-0.00546	7.86398e-30
NR2C1_MA1535.1	NR2C1	MA1535.1	C_NR2C2	91279	0.06968	21217	0.07325	23112	-0.05846	8.9088e-124
NR2C2_MA1536.1	NR2C2	MA1536.1	C_NR2C2	62621	0.06758	13639	0.07086	14840	-0.05619	9.06109e-113
NR2F1_MA1537.1	NR2F1	MA1537.1	C_NR2C2	88748	0.06895	19704	0.07196	20964	-0.04804	3.35362e-116
NR2F1_MA1538.1	NR2F1	MA1538.1	C_NR2F1	43219	0.07868	11798	0.08295	12370	-0.0569	3.12519e-105
NR2F6_MA1539.1	NR2F6	MA1539.1	C_NR2F1	39067	0.078	10764	0.0821	11256	-0.05535	1.11574e-105
NR5A1_MA1540.2	NR5A1	MA1540.2	C_NR5A1	155207	0.06695	35372	0.06964	38461	-0.06654	2.00023e-138
NR6A1_MA1541.1	NR6A1	MA1541.1	C_NR6A1	84490	0.06773	19297	0.06916	20183	-0.0278	1.08801e-97
OSR1_MA1542.1	OSR1	MA1542.1	C_OSR1	57566	0.08964	19430	0.09026	19269	0.0101	9.11586e-44
OVOL1_MA1544.1	OVOL1	MA1544.1	C_OVOL1	8393	0.09089	2548	0.09533	2645	-0.03877	2.06417e-57
OVOL2_MA1545.1	OVOL2	MA1545.1	C_OVOL1	7862	0.09745	2590	0.10282	2668	-0.04864	9.28762e-67
PAX3_MA1546.1	PAX3	MA1546.1	C_PAX3	20771	0.08863	6104	0.09156	6302	-0.0169	5.9106e-49
PITX2_MA1547.2	PITX2	MA1547.2	C_OTX2	56079	0.06398	11391	0.06383	11411	0.00084	0.00264531
PLAGL2_MA1548.1	PLAGL2	MA1548.1	C_PLAGL2	57062	0.12013	24838	0.13382	25571	-0.12876	2.07823e-148
POU6F1_MA1549.1	POU6F1	MA1549.1	C_POU6F2	55547	0.06563	12262	0.0655	12401	0.00554	2.88845e-23
PPARD_MA1550.1	PPARD	MA1550.1	C_NR2C2	83013	0.06571	17353	0.06796	18316	-0.03741	5.84398e-105
RARB_MA1552.1	RARB	MA1552.1	C_RXRG	34720	0.08464	9415	0.08998	9863	-0.05238	1.57255e-98
RARG_MA1553.1	RARG	MA1553.1	C_RXRG	34030	0.07804	8566	0.08195	8950	-0.04013	2.66136e-83
RFX7_MA1554.1	RFX7	MA1554.1	C_RFX7	43092	0.10509	16147	0.10548	15732	0.03444	3.53573e-85
RXRB_MA1555.1	RXRB	MA1555.1	C_RXRG	36967	0.08477	10267	0.09008	10672	-0.05683	1.91164e-106
RXRG_MA1556.1	RXRG	MA1556.1	C_RXRG	45709	0.08988	13057	0.09603	13736	-0.06331	4.18027e-118
SMAD5_MA1557.1	SMAD5	MA1557.1	C_SMAD3	22757	0.08572	7132	0.08782	7177	-0.00759	7.38734e-16
SNAI1_MA1558.1	SNAI1	MA1558.1	C_ASCL1	116244	0.08292	37433	0.08338	37635	0.005	3.70321e-29
SNAI3_MA1559.1	SNAI3	MA1559.1	C_ASCL1	116371	0.08241	37328	0.08275	37463	0.00549	4.75149e-35
SOHLH2_MA1560.1	SOHLH2	MA1560.1	C_MYC	26374	0.13705	11425	0.14928	11668	-0.07065	6.85096e-115
SOX12_MA1561.1	SOX12	MA1561.1	C_SOX12	35271	0.06999	8199	0.07122	8335	-0.02621	2.06273e-72
SOX14_MA1562.1	SOX14	MA1562.1	C_SOX14	38048	0.06682	8197	0.06778	8368	-0.0196	3.76667e-62
SOX18_MA1563.2	SOX18	MA1563.2	C_SOX18	44777	0.06072	8422	0.06098	8508	-0.00907	7.47675e-39
SP9_MA1564.1	SP9	MA1564.1	C_KLF9	188822	0.159	86878	0.17521	86599	-0.06974	6.94857e-151
TBX18_MA1565.1	TBX18	MA1565.1	C_TBX18	107977	0.09155	37963	0.08802	36025	0.0804	4.08828e-143
TBX3_MA1566.2	TBX3	MA1566.2	C_TBX18	67018	0.08488	22100	0.08118	21205	0.06808	6.4943e-126
Tbx6_MA1567.2	Tbx6	MA1567.2	C_TBX18	105976	0.08742	35911	0.08382	34426	0.07199	7.38573e-137
TCF21_MA1568.1	TCF21	MA1568.1	C_ATOH7	47684	0.09492	17879	0.0935	17718	0.00931	3.52216e-41
TFAP2E_MA1569.1	TFAP2E	MA1569.1	C_TFAP2C	69192	0.13289	32916	0.14975	33642	-0.14493	7.31548e-155
TFAP4_MA1570.1	TFAP4	MA1570.1	C_TFAP4	46394	0.07514	12815	0.07457	12838	-0.00631	7.3996e-30
TGIF2LX_MA1571.1	TGIF2LX	MA1571.1	C_TGIF2LX	51114	0.08538	17062	0.08497	16912	0.02171	4.17125e-67
TGIF2LY_MA1572.1	TGIF2LY	MA1572.1	C_TGIF2LX	47935	0.0839	15660	0.08343	15535	0.02164	6.73067e-71
Thap11_MA1573.2	Thap11	MA1573.2	C_Thap11	89827	0.09785	27019	0.10039	26738	0.00648	1.18793e-33
THRB_MA1574.1	THRB	MA1574.1	C_NR2C2	85787	0.07346	20767	0.07691	21784	-0.0457	6.33515e-117
THRB_MA1575.1	THRB	MA1575.1	C_THRB	42936	0.09203	14452	0.09695	14898	-0.04344	8.53664e-97
THRB_MA1576.1	THRB	MA1576.1	C_THRB	93506	0.07699	25516	0.0798	26845	-0.04428	3.64299e-114
TLX2_MA1577.1	TLX2	MA1577.1	C_TLX2	25127	0.06907	5365	0.07026	5424	-0.00175	0.00101755
VEZF1_MA1578.1	VEZF1	MA1578.1	C_ZNF740	91745	0.09186	29655	0.09853	30442	-0.05644	2.29861e-126
ZBTB26_MA1579.1	ZBTB26	MA1579.1	C_ZBTB26	140403	0.08385	44029	0.08252	42748	0.04188	2.79153e-125
ZBTB32_MA1580.1	ZBTB32	MA1580.1	C_ZBTB32	62621	0.07184	16329	0.07234	17173	-0.02566	8.21297e-79
ZBTB6_MA1581.1	ZBTB6	MA1581.1	C_ZBTB6	120712	0.10099	45193	0.10475	45120	-0.01452	9.82209e-69
ZFP57_MA1583.1	ZFP57	MA1583.1	C_ZFP57	19795	0.17337	11435	0.19989	11772	-0.22455	9.47978e-150
ZIC5_MA1584.1	ZIC5	MA1584.1	C_ZIC5	101963	0.13886	49797	0.15387	50537	-0.11376	3.90648e-158
ZKSCAN1_MA1585.1	ZKSCAN1	MA1585.1	C_ZKSCAN1	50080	0.08656	15843	0.0848	15210	0.05257	1.61269e-108
ZNF135_MA1587.1	ZNF135	MA1587.1	C_ZNF135	138398	0.09417	44909	0.09959	46107	-0.05679	1.15889e-136
ZNF136_MA1588.1	ZNF136	MA1588.1	C_ZNF136	71739	0.07307	18613	0.07093	17800	0.04899	3.42835e-108
ZNF140_MA1589.1	ZNF140	MA1589.1	C_ZNF140	78908	0.09051	26301	0.08989	25428	0.0452	7.60687e-112
ZNF274_MA1592.1	ZNF274	MA1592.1	C_ZNF274	79310	0.08117	24263	0.08052	23714	0.0322	2.2657e-99
ZNF317_MA1593.1	ZNF317	MA1593.1	C_ZNF317	138140	0.08507	46203	0.08337	45134	0.03766	5.27151e-114
ZNF382_MA1594.1	ZNF382	MA1594.1	C_ZNF382	70250	0.07916	20052	0.07909	19972	0.01222	2.37813e-56
ZNF460_MA1596.1	ZNF460	MA1596.1	C_ZNF460	269070	0.12839	119019	0.14055	120775	-0.09211	1.14946e-166
ZNF528_MA1597.1	ZNF528	MA1597.1	C_ZNF528	129954	0.08675	41936	0.08673	41212	0.02792	3.34644e-103
ZNF682_MA1599.1	ZNF682	MA1599.1	C_ZNF682	124919	0.12439	51104	0.13518	51819	-0.06883	1.24611e-138
ZNF684_MA1600.1	ZNF684	MA1600.1	C_ZNF684	114402	0.09222	38474	0.09307	38199	0.01577	5.26416e-76
ZNF75D_MA1601.2	ZNF75D	MA1601.2	C_ZNF75D	111434	0.08761	36882	0.08543	35342	0.06219	8.82559e-134
ZSCAN29_MA1602.1	ZSCAN29	MA1602.1	C_ZSCAN29	45408	0.08622	14411	0.08886	14950	-0.04223	2.24142e-95
Dmrt1_MA1603.1	Dmrt1	MA1603.1	C_Dmrt1	70733	0.06272	14722	0.06268	15009	-0.01844	4.23056e-72
Ebf2_MA1604.1	Ebf2	MA1604.1	C_EBF1	124706	0.09013	42368	0.0925	42486	-0.00749	7.695e-49
Foxf1_MA1606.1	Foxf1	MA1606.1	C_FOXN3	83527	0.06042	15375	0.06318	16946	-0.08474	9.04789e-141
Foxl2_MA1607.1	Foxl2	MA1607.1	C_FOXN3	92410	0.0589	16548	0.06079	17887	-0.06502	1.62963e-128
Isl1_MA1608.1	Isl1	MA1608.1	C_Isl1	41087	0.06583	8839	0.06646	9038	-0.00501	1.85588e-16
Plagl1_MA1615.1	Plagl1	MA1615.1	C_Plagl1	160460	0.10646	62095	0.11528	64000	-0.08135	1.05476e-156
Prdm15_MA1616.1	Prdm15	MA1616.1	C_Prdm15	117157	0.08286	35307	0.08258	34595	0.02477	4.32547e-96
Ptf1a_MA1618.1	Ptf1a	MA1618.1	C_Neurod2	134246	0.08872	48451	0.08798	48905	0.00348	2.53124e-22
Ptf1A_MA1619.1	Ptf1A	MA1619.1	C_Tcf12	105761	0.09536	40803	0.09629	40985	0.00147	4.12744e-07
Ptf1A_MA1620.1	Ptf1A	MA1620.1	C_Rbpjl	115189	0.08176	37043	0.08241	37361	0.00366	4.19259e-24
Rbpjl_MA1621.1	Rbpjl	MA1621.1	C_Rbpjl	125659	0.08434	41660	0.08518	41876	0.0031	7.86772e-15
Stat2_MA1623.1	Stat2	MA1623.1	C_Stat2	252407	0.06241	50975	0.06157	49452	0.00199	4.65762e-16
Stat5a_MA1624.1	Stat5a	MA1624.1	C_Stat5a	105403	0.07917	29877	0.07685	28354	0.05825	7.55609e-130
Stat5b_MA1625.1	Stat5b	MA1625.1	C_Stat5b	135389	0.08209	39441	0.08051	37829	0.04679	9.28576e-127
Wt1_MA1627.1	Wt1	MA1627.1	C_Wt1	272137	0.12309	118785	0.12858	115583	0.0072	8.51075e-58
Zic1Zic2_MA1628.1	Zic1::Zic2	MA1628.1	C_Zic2	144595	0.11074	60504	0.11639	60681	-0.03463	1.02988e-109
Zic2_MA1629.1	Zic2	MA1629.1	C_Zic2	209290	0.09963	81009	0.10103	80180	0.00966	2.37286e-62
ZNF281_MA1630.2	ZNF281	MA1630.2	C_PATZ1	350432	0.11923	140563	0.1275	139965	-0.0327	9.70783e-127
ASCL1_MA1631.1	ASCL1	MA1631.1	C_ASCL1	168154	0.1015	66222	0.10479	66072	-0.01081	1.56025e-68
ATF2_MA1632.1	ATF2	MA1632.1	C_FOSL1::JUN	62780	0.08459	17208	0.08568	17324	0.01291	3.90272e-52
BACH1_MA1633.2	BACH1	MA1633.2	C_FOSL1::JUN	75712	0.1031	31775	0.09961	30293	0.07388	4.49427e-133
BATF_MA1634.1	BATF	MA1634.1	C_FOSL1::JUN	82697	0.10143	34216	0.09768	32720	0.07414	3.7364e-131
BHLHE22_MA1635.1	BHLHE22	MA1635.1	C_Tcf12	114178	0.09687	44810	0.09788	44923	0.00174	1.25552e-08
CEBPG_MA1636.1	CEBPG	MA1636.1	C_CEBPG	53266	0.07221	13440	0.06915	12561	0.06426	3.59666e-116
EBF3_MA1637.1	EBF3	MA1637.1	C_EBF1	121264	0.09186	41952	0.09482	42187	-0.0142	1.04946e-69
HAND2_MA1638.1	HAND2	MA1638.1	C_Neurod2	138271	0.09407	53019	0.09293	52872	0.01571	2.66898e-81
MEIS1_MA1639.1	MEIS1	MA1639.1	C_MEIS2	53993	0.06354	11259	0.06328	11092	0.01063	1.0968e-47
MEIS2_MA1640.1	MEIS2	MA1640.1	C_MEIS2	63308	0.05807	11070	0.05816	11007	-0.01391	3.23203e-56
MYF5_MA1641.1	MYF5	MA1641.1	C_Tcf12	105456	0.09555	40893	0.09632	40982	0.00307	2.62654e-17
NEUROG2_MA1642.1	NEUROG2	MA1642.1	C_Neurod2	135610	0.09678	53739	0.09547	53760	0.01441	4.93861e-77
NFIB_MA1643.1	NFIB	MA1643.1	C_NFIB	128520	0.09607	48391	0.09741	47539	0.01292	3.87166e-65
NFYC_MA1644.1	NFYC	MA1644.1	C_NFYA	56043	0.13469	17389	0.14161	17148	0.01653	1.03148e-62
NKX2-2_MA1645.1	NKX2-2	MA1645.1	C_NKX2-2	94608	0.08717	30942	0.08544	30311	0.04631	8.7471e-119
OSR2_MA1646.1	OSR2	MA1646.1	C_OSR2	159759	0.08908	54227	0.08836	53135	0.029	5.69069e-111
Prdm4_MA1647.2	Prdm4	MA1647.2	C_Prdm4	87400	0.08221	26020	0.08142	25402	0.03672	1.23977e-106
TCF12_MA1648.1	TCF12	MA1648.1	C_ASCL1	130848	0.11818	55559	0.12655	55972	-0.05383	1.29553e-127
ZBTB12_MA1649.1	ZBTB12	MA1649.1	C_ZBTB12	104225	0.07695	28831	0.07714	29315	-0.00857	4.23164e-50
ZBTB14_MA1650.1	ZBTB14	MA1650.1	C_ZBTB14	70301	0.21401	46026	0.2526	47585	-0.32133	2.7273e-193
ZFP42_MA1651.1	ZFP42	MA1651.1	C_ZFP42	99062	0.09757	33207	0.10001	32585	0.01321	1.49315e-63
ZKSCAN5_MA1652.1	ZKSCAN5	MA1652.1	C_ZKSCAN5	208354	0.09689	73936	0.09701	71760	0.04252	4.38364e-132
ZNF148_MA1653.1	ZNF148	MA1653.1	C_PATZ1	309773	0.13189	134596	0.14473	136026	-0.08054	2.61075e-173
ZNF16_MA1654.1	ZNF16	MA1654.1	C_ZNF16	148993	0.0938	52463	0.09445	51802	0.01825	6.74107e-86
ZNF341_MA1655.1	ZNF341	MA1655.1	C_ZNF341	116854	0.09755	43580	0.09808	42968	0.0171	3.17892e-81
ZNF449_MA1656.1	ZNF449	MA1656.1	C_ZNF449	126114	0.10355	45614	0.10883	46190	-0.03428	2.83785e-113
ZNF652_MA1657.1	ZNF652	MA1657.1	C_ZNF652	61502	0.06521	12930	0.06469	12770	0.01158	9.19943e-58
FOXA3_MA1683.1	FOXA3	MA1683.1	C_FOXN3	70370	0.06168	13586	0.06492	15126	-0.09003	4.26599e-143
Foxn1_MA1684.1	Foxn1	MA1684.1	C_Foxn1	35748	0.1681	19767	0.19344	20579	-0.22937	6.47275e-159
DMRTA1_MA1707.1	DMRTA1	MA1707.1	C_DMRTA1	52417	0.06225	10583	0.061	10409	0.02556	1.74196e-82
ETV7_MA1708.1	ETV7	MA1708.1	C_Spi1	81235	0.11649	28421	0.1217	27768	0.01677	4.79285e-70
ZIM3_MA1709.1	ZIM3	MA1709.1	C_ZIM3	180855	0.06648	40605	0.06556	39678	0.00868	9.98976e-63
ZNF257_MA1710.1	ZNF257	MA1710.1	C_ZNF257	252737	0.09804	88369	0.10065	87780	0.0023	1.54806e-18
ZNF343_MA1711.1	ZNF343	MA1711.1	C_ZNF343	79347	0.12721	35476	0.13701	35562	-0.05968	5.47521e-122
ZNF454_MA1712.1	ZNF454	MA1712.1	C_ZNF454	172988	0.13546	84354	0.15196	86800	-0.14872	2.46778e-180
ZNF610_MA1713.1	ZNF610	MA1713.1	C_ZNF610	132823	0.19478	83616	0.2299	86320	-0.30471	7.98437e-201
ZNF675_MA1714.1	ZNF675	MA1714.1	C_ZNF675	110826	0.07917	31514	0.07922	31411	0.01605	6.70718e-73
ZNF707_MA1715.1	ZNF707	MA1715.1	C_ZNF707	138703	0.09687	48829	0.09835	48433	0.01229	2.46652e-74
ZNF76_MA1716.1	ZNF76	MA1716.1	C_ZNF76	112422	0.1123	42356	0.11557	41633	0.01616	3.10274e-70
ZNF784_MA1717.1	ZNF784	MA1717.1	C_ZNF784	33932	0.08629	10655	0.08653	10563	0.01682	4.04616e-56
ZNF8_MA1718.1	ZNF8	MA1718.1	C_ZNF8	58712	0.06684	13505	0.06556	13496	0.01329	6.158e-57
ZNF816_MA1719.1	ZNF816	MA1719.1	C_ZNF816	145259	0.09818	53365	0.10324	54041	-0.03538	2.07048e-109
ZNF85_MA1720.1	ZNF85	MA1720.1	C_ZNF85	70495	0.08025	21179	0.07818	20356	0.05336	2.10094e-120
ZNF93_MA1721.1	ZNF93	MA1721.1	C_ZNF93	127594	0.1612	72811	0.18496	74353	-0.20054	7.67724e-186
ZSCAN31_MA1722.1	ZSCAN31	MA1722.1	C_ZSCAN31	64879	0.08947	21442	0.09086	21419	0.00945	5.70213e-41
PRDM9_MA1723.1	PRDM9	MA1723.1	C_PRDM9	379763	0.10354	142011	0.108	140566	-0.01004	2.37063e-80
Rfx6_MA1724.1	Rfx6	MA1724.1	C_Rfx6	104154	0.09427	34932	0.09376	34114	0.03177	2.69668e-102
ZNF189_MA1725.1	ZNF189	MA1725.1	C_ZNF189	153484	0.08996	52552	0.08961	51247	0.02706	3.75124e-102
ZNF331_MA1726.1	ZNF331	MA1726.1	C_ZNF331	181194	0.1025	71231	0.10386	70387	0.01423	2.01371e-76
ZNF417_MA1727.1	ZNF417	MA1727.1	C_ZNF417	49708	0.13457	23337	0.14474	23454	-0.05624	1.37644e-109
ZNF549_MA1728.1	ZNF549	MA1728.1	C_ZNF549	178641	0.10078	69036	0.10499	69949	-0.03055	1.1376e-110
ZNF680_MA1729.1	ZNF680	MA1729.1	C_ZNF680	123968	0.0691	29370	0.06777	28483	0.03129	1.09904e-102
ZNF708_MA1730.1	ZNF708	MA1730.1	C_ZNF708	141733	0.10408	56492	0.106	56211	0.00703	6.20743e-48
ZNF768_MA1731.1	ZNF768	MA1731.1	C_ZNF768	217658	0.09327	76110	0.09432	75527	0.01278	4.01012e-77
BNC2_MA1928.1	BNC2	MA1928.1	C_FOSL1::JUN	78774	0.10425	33818	0.10037	32324	0.07651	5.68022e-136
CTCF_MA1929.1	CTCF	MA1929.1	C_CTCF	194307	0.13103	91991	0.13887	92242	-0.04847	1.77723e-135
CTCF_MA1930.1	CTCF	MA1930.1	C_CTCF	168154	0.13009	80203	0.13684	80319	-0.03252	1.10223e-113
ELK1HOXA1_MA1931.1	ELK1::HOXA1	MA1931.1	C_ELK1::HOXA1	39093	0.12699	13665	0.13502	13568	-0.01875	9.72336e-57
ELK1HOXB13_MA1932.1	ELK1::HOXB13	MA1932.1	C_ELK1::HOXB13	30407	0.11279	9902	0.11874	9780	-0.01128	1.55953e-40
ELK1SREBF2_MA1933.1	ELK1::SREBF2	MA1933.1	C_ELK1::SREBF2	36733	0.1416	15057	0.15232	15039	-0.02883	7.52608e-80
ERFFIGLA_MA1934.1	ERF::FIGLA	MA1934.1	C_ETV5::FIGLA	94511	0.10232	36137	0.10541	36168	-0.00887	9.14878e-52
ERFFOXI1_MA1935.1	ERF::FOXI1	MA1935.1	C_ERF::FOXI1	108810	0.08986	32178	0.09125	31806	0.01616	2.37523e-75
ERFFOXO1_MA1936.1	ERF::FOXO1	MA1936.1	C_ERF::FOXO1	120190	0.08307	35045	0.08344	34919	0.01119	5.46906e-61
ERFHOXB13_MA1937.1	ERF::HOXB13	MA1937.1	C_ERF::HOXB13	40877	0.08163	11131	0.08206	10844	0.0197	2.08942e-65
ERFNHLH1_MA1938.1	ERF::NHLH1	MA1938.1	C_ERF::NHLH1	98655	0.11499	42255	0.11928	41683	-0.00734	1.33999e-47
ERFSREBF2_MA1939.1	ERF::SREBF2	MA1939.1	C_ERF::SREBF2	36071	0.09696	11669	0.10065	11706	-0.00581	2.02474e-20
ETV2DRGX_MA1940.1	ETV2::DRGX	MA1940.1	C_ETV5::DRGX	39006	0.08093	10413	0.08127	10035	0.02194	8.75731e-63
ETV2FIGLA_MA1941.1	ETV2::FIGLA	MA1941.1	C_ETV5::FIGLA	112706	0.10728	44546	0.11132	44408	-0.01596	2.03665e-70
ETV2FOXI1_MA1942.1	ETV2::FOXI1	MA1942.1	C_ERF::FOXI1	120276	0.08805	36589	0.08913	36296	0.01123	1.09712e-63
ETV2HOXB13_MA1943.1	ETV2::HOXB13	MA1943.1	C_ETV2::HOXB13	30381	0.07668	7633	0.07762	7499	0.00795	2.66444e-25
ETV5DRGX_MA1944.1	ETV5::DRGX	MA1944.1	C_ETV5::DRGX	58035	0.08858	17224	0.08909	16636	0.02756	8.44264e-83
ETV5FIGLA_MA1945.1	ETV5::FIGLA	MA1945.1	C_ETV5::FIGLA	142312	0.10302	54961	0.10562	54510	-0.00036	0.244154
ETV5FOXI1_MA1946.1	ETV5::FOXI1	MA1946.1	C_ERF::FOXI1	96353	0.0852	28618	0.08585	28397	0.01344	6.6948e-65
ETV5FOXO1_MA1947.1	ETV5::FOXO1	MA1947.1	C_ETV5::FOXO1	108264	0.07953	30641	0.07983	30702	0.00439	1.80362e-24
ETV5HOXA2_MA1948.1	ETV5::HOXA2	MA1948.1	C_ETV5::HOXA2	38752	0.08735	11296	0.08853	11101	0.01327	2.04329e-51
FLI1DRGX_MA1949.1	FLI1::DRGX	MA1949.1	C_ETV5::DRGX	40945	0.08968	11849	0.09123	11553	0.0152	8.85742e-52
FLI1FOXI1_MA1950.1	FLI1::FOXI1	MA1950.1	C_ERF::FOXI1	118559	0.08003	32875	0.08021	32717	0.01524	2.05712e-77
FOS_MA1951.1	FOS	MA1951.1	C_FOSL1::JUN	26519	0.11983	9580	0.12432	9452	0.0242	8.8989e-66
FOXJ2ELF1_MA1952.1	FOXJ2::ELF1	MA1952.1	C_FOXJ2::ELF1	117893	0.07927	30091	0.08	29608	0.01066	2.38359e-60
FOXO1ELF1_MA1953.1	FOXO1::ELF1	MA1953.1	C_ERF::FOXI1	126578	0.07726	34524	0.07693	34266	0.01301	1.28352e-62
FOXO1ELK1_MA1954.1	FOXO1::ELK1	MA1954.1	C_ERF::FOXI1	129270	0.0805	35813	0.08051	35478	0.01621	2.65501e-83
FOXO1ELK3_MA1955.1	FOXO1::ELK3	MA1955.1	C_ERF::FOXI1	97372	0.07918	26172	0.07993	26217	0.00102	0.000448159
FOXO1FLI1_MA1956.1	FOXO1::FLI1	MA1956.1	C_ERF::FOXI1	109736	0.07386	27199	0.07418	27305	0.00075	0.0250028
HOXB2ELK1_MA1957.1	HOXB2::ELK1	MA1957.1	C_HOXB2::ELK1	37747	0.11179	12403	0.11756	12290	-0.01087	1.39649e-43
HOXD12ELK1_MA1958.1	HOXD12::ELK1	MA1958.1	C_HOXD12::ELK1	42087	0.07826	10879	0.07827	10563	0.02678	1.47515e-79
KLF7_MA1959.1	KLF7	MA1959.1	C_KLF4	217391	0.14197	96557	0.15583	96954	-0.07314	1.04871e-146
MGAEVX1_MA1960.1	MGA::EVX1	MA1960.1	C_MGA::EVX1	56983	0.07147	14234	0.06974	13839	0.03168	1.31459e-88
PATZ1_MA1961.1	PATZ1	MA1961.1	C_PATZ1	295834	0.1496	142040	0.16828	144388	-0.13226	2.49955e-186
POU2F1SOX2_MA1962.1	POU2F1::SOX2	MA1962.1	C_POU2F1::SOX2	82473	0.05851	14720	0.05791	14421	0.0046	3.2001e-22
SATB1_MA1963.1	SATB1	MA1963.1	C_SATB1	42705	0.05282	5769	0.05376	5954	-0.02934	7.49378e-78
SMAD2_MA1964.1	SMAD2	MA1964.1	C_SMAD2	105985	0.09198	37017	0.09329	36888	0.00126	1.27126e-05
SP5_MA1965.1	SP5	MA1965.1	C_SP5	266246	0.11243	107457	0.11594	105269	0.01145	7.79342e-87
TFAP4ETV1_MA1966.1	TFAP4::ETV1	MA1966.1	C_ETV5::FIGLA	123111	0.11782	52592	0.1245	52429	-0.03639	3.08087e-112
TFAP4FLI1_MA1967.1	TFAP4::FLI1	MA1967.1	C_TFAP4::FLI1	115127	0.09706	43521	0.098	43150	0.00994	1.01182e-55
TFCP2_MA1968.1	TFCP2	MA1968.1	C_TFCP2	19955	0.08281	5699	0.08332	5600	0.01854	5.89959e-46
THRA_MA1969.1	THRA	MA1969.1	C_THRA	130302	0.08545	41556	0.08785	42518	-0.0193	6.88276e-87
TRPS1_MA1970.1	TRPS1	MA1970.1	C_Gata3	60988	0.06468	13238	0.06306	12985	0.02938	1.74529e-83
ZBED2_MA1971.1	ZBED2	MA1971.1	C_ZBED2	17552	0.12032	7056	0.13039	7028	-0.06238	7.46353e-95
ZFP14_MA1972.1	ZFP14	MA1972.1	C_ZFP14	237644	0.09993	85809	0.10311	84844	-0.00076	1.15002e-06
ZKSCAN3_MA1973.1	ZKSCAN3	MA1973.1	C_ZKSCAN3	138518	0.09462	47337	0.09954	48885	-0.0549	6.1207e-135
ZNF211_MA1974.1	ZNF211	MA1974.1	C_ZNF211	51041	0.06291	10462	0.06161	10234	0.02183	1.99638e-68
ZNF214_MA1975.1	ZNF214	MA1975.1	C_ZNF214	63425	0.07086	15672	0.07112	15843	-0.00129	0.00065299
ZNF320_MA1976.1	ZNF320	MA1976.1	C_ZNF320	261003	0.11505	107958	0.12533	109867	-0.08092	3.58195e-160
ZNF324_MA1977.1	ZNF324	MA1977.1	C_ZNF324	126790	0.08443	39831	0.08377	39021	0.02957	7.36892e-105
ZNF354A_MA1978.1	ZNF354A	MA1978.1	C_ZNF354A	128341	0.05188	18005	0.05188	17875	-0.02536	5.03184e-97
ZNF416_MA1979.1	ZNF416	MA1979.1	C_ZNF416	130589	0.08854	43830	0.08948	43830	0.00586	8.43867e-42
ZNF418_MA1980.1	ZNF418	MA1980.1	C_ZNF418	141285	0.0775	40280	0.07641	39548	0.02505	6.61576e-100
ZNF530_MA1981.1	ZNF530	MA1981.1	C_ZNF530	298049	0.10998	115498	0.11768	116177	-0.04659	2.55986e-133
ZNF574_MA1982.1	ZNF574	MA1982.1	C_ZNF574	108943	0.11508	43822	0.12253	44359	-0.04887	3.77621e-123
ZNF582_MA1983.1	ZNF582	MA1983.1	C_ZNF582	87278	0.08007	25711	0.07915	25051	0.02992	9.67174e-95
ZNF667_MA1984.1	ZNF667	MA1984.1	C_ZNF667	95772	0.07901	28054	0.07805	27690	0.02641	7.11655e-97
ZNF669_MA1985.1	ZNF669	MA1985.1	C_ZNF669	43276	0.12666	19466	0.14084	20035	-0.12932	4.73571e-150
ZNF692_MA1986.1	ZNF692	MA1986.1	C_ZNF692	106479	0.10341	40179	0.10898	40654	-0.03331	2.03059e-108
ZNF701_MA1987.1	ZNF701	MA1987.1	C_ZNF701	283399	0.10241	104632	0.10624	103225	0.00081	1.05288e-05
Atf3_MA1988.1	Atf3	MA1988.1	C_FOSL1::JUN	83971	0.10215	35133	0.0984	33612	0.07359	1.06481e-132
Bcl11B_MA1989.1	Bcl11B	MA1989.1	C_Bcl11B	126499	0.06906	29711	0.06874	29877	-0.00221	2.87666e-14
Gli1_MA1990.1	Gli1	MA1990.1	C_Gli2	127032	0.09593	45655	0.09747	45493	0.00546	4.05654e-41
Hnf1A_MA1991.1	Hnf1A	MA1991.1	C_Lef1	102625	0.06849	24189	0.06836	24137	0.00689	9.31889e-36
Ikzf3_MA1992.1	Ikzf3	MA1992.1	C_Erg	208038	0.09603	70485	0.09767	69379	0.02103	1.30464e-98
Neurod2_MA1993.1	Neurod2	MA1993.1	C_Tcf12	110845	0.09644	43366	0.09741	43461	0.0019	1.84537e-09
Nkx2-1_MA1994.1	Nkx2-1	MA1994.1	C_Nkx2-1	66288	0.07189	16911	0.07083	16798	0.02324	2.71642e-81
Npas4_MA1995.1	Npas4	MA1995.1	C_Npas4	25115	0.11867	10522	0.12293	10385	0.01673	6.84264e-47
Nr1H2_MA1996.1	Nr1H2	MA1996.1	C_Nr1H2	100311	0.06484	21059	0.06755	23059	-0.05277	4.14353e-123
Olig2_MA1997.1	Olig2	MA1997.1	C_Tcf12	114668	0.09625	44742	0.09717	44877	0.00242	9.53954e-12
Prdm14_MA1998.1	Prdm14	MA1998.1	C_Prdm14	66419	0.08026	19096	0.08148	19546	-0.00848	1.40819e-38
Prdm5_MA1999.1	Prdm5	MA1999.1	C_Prdm5	157238	0.09038	53771	0.09063	52892	0.01989	2.02028e-94
Six4_MA2001.1	Six4	MA2001.1	C_SIX1	69755	0.07439	18343	0.07391	17888	0.0194	2.89006e-73
Zfp335_MA2002.1	Zfp335	MA2002.1	C_Zfp335	151540	0.09119	53700	0.09133	53160	0.01823	3.69683e-89
NKX2-4_MA2003.1	NKX2-4	MA2003.1	C_NKX2-3	78684	0.081	23276	0.08021	23017	0.03138	3.15813e-103

## Sheet: 8wkstr neun pos
output_prefix	name	motif_id	cluster	total_tfbs	WT.STR.8W.Pos_footprints_mean_score	WT.STR.8W.Pos_footprints_bound	HD.STR.8W.Pos_footprints_mean_score	HD.STR.8W.Pos_footprints_bound	WT.STR.8W.Pos_footprints_HD.STR.8W.Pos_footprints_change	WT.STR.8W.Pos_footprints_HD.STR.8W.Pos_footprints_pvalue
Runx1_MA0002.2	Runx1	MA0002.2	C_Bcl11B	146497	0.06644	23043	0.06539	22369	0.02942	1.44384e-106
TFAP2A_MA0003.4	TFAP2A	MA0003.4	C_TFAP2C	140246	0.10039	35852	0.10386	35322	-0.01356	5.59183e-79
Arnt_MA0004.1	Arnt	MA0004.1	C_MYC	45263	0.10773	11192	0.10866	10607	0.05123	8.08528e-106
AhrArnt_MA0006.1	Ahr::Arnt	MA0006.1	C_Ahr::Arnt	61000	0.11034	16440	0.11452	16555	-0.02667	1.7406e-84
Ar_MA0007.3	Ar	MA0007.3	C_Ar	49035	0.07786	9564	0.08018	9917	-0.0528	1.09721e-108
TBXT_MA0009.2	TBXT	MA0009.2	C_TBXT	39454	0.06686	6062	0.06429	5601	0.06367	3.25691e-111
PAX5_MA0014.3	PAX5	MA0014.3	C_PAX5	39294	0.14215	11957	0.15282	11852	-0.05288	2.98125e-106
NR2F1_MA0017.2	NR2F1	MA0017.2	C_NR2F1	91608	0.06242	12874	0.05979	11509	0.09787	1.06842e-149
CREB1_MA0018.4	CREB1	MA0018.4	C_FOSL1::JUN	78091	0.07621	13266	0.07536	12569	0.04827	2.78804e-117
Ddit3Cebpa_MA0019.1	Ddit3::Cebpa	MA0019.1	C_Ddit3::Cebpa	42402	0.06952	7014	0.06858	6923	0.01619	8.24912e-58
E2F1_MA0024.3	E2F1	MA0024.3	C_ZNF417	9513	0.15718	3597	0.17218	3755	-0.18134	3.37077e-124
NFIL3_MA0025.2	NFIL3	MA0025.2	C_NFIL3	56018	0.07089	9651	0.0726	10260	-0.06521	1.12658e-118
EN1_MA0027.2	EN1	MA0027.2	C_ESX1	31891	0.06803	4655	0.07085	5274	-0.12626	1.7933e-137
[truncated: 828 more rows]

## Sheet: 12wkctx neun pos
output_prefix	name	motif_id	cluster	total_tfbs	WT.COR.12W.Pos_footprints_mean_score	WT.COR.12W.Pos_footprints_bound	HD.COR.12W.Pos_footprints_mean_score	HD.COR.12W.Pos_footprints_bound	WT.COR.12W.Pos_footprints_HD.COR.12W.Pos_footprints_change	WT.COR.12W.Pos_footprints_HD.COR.12W.Pos_footprints_pvalue
[truncated: 841 more rows]

[truncated: 1 more sheets: 12wkstr neun pos]
