# Supplementary material for: Huntington disease oligodendrocyte maturation deficits revealed by single-nucleus RNAseq are rescued by thiamine-biotin supplementation
Source: Nat Commun. 2022 Dec 21;13:7791. doi: 10.1038/s41467-022-35388-x (PMC9772349; doi:10.1038/s41467-022-35388-x)
Supplement: Supplementary file 8 — Supplementary Dataset 6 [file 41467_2022_35388_MOESM8_ESM.xlsx]

## Sheet: Donor_metadata
Sample	Donor	Gender	Age	Region	Grade
T-178_Cing	T-178	M	39	Cingulate	HDJ
T-180_Cing	T-180	F	52	Cingulate	Control
T-1905_Cing	T-1905	M	24	Cingulate	HDJ
T-4110_Cing	T-4110	F	49	Cingulate	HD4
T-4161_Accu	T-4161	M	56	Accumbens	HD3
T-4161_Caud	T-4161	M	56	Caudate	HD3
T-4161_Cing	T-4161	M	56	Cingulate	HD3
T-4273_Caud	T-4273	M	53	Caudate	HD4
T-4273_Cing	T-4273	M	53	Cingulate	HD4
T-4285_Accu	T-4285	F	61	Accumbens	HD1
T-4285_Caud	T-4285	F	61	Caudate	HD1
T-4285_Cing	T-4285	F	61	Cingulate	HD1
T-4638_Accu	T-4638	F	39	Accumbens	HDJ
T-4638_Caud	T-4638	F	39	Caudate	HDJ
T-4638_Cing	T-4638	F	39	Cingulate	HDJ
T-4812_Caud	T-4812	M	36	Caudate	Control
T-4915_Accu	T-4915	M	62	Accumbens	Control
T-4915_Caud	T-4915	M	62	Caudate	HDJ
T-4915_Cing	T-4915	M	62	Cingulate	Control
T-4931_Cing	T-4931	M	66	Cingulate	Control
T-5109_Accu	T-5109	M	64	Accumbens	HD3
T-5109_Caud	T-5109	M	64	Caudate	HD3
T-5109_Cing	T-5109	M	64	Cingulate	HD3
T-5227_Accu	T-5227	M	75	Accumbens	Control
T-5227_Caud	T-5227	M	75	Caudate	Control
T-5227_Cing	T-5227	M	75	Cingulate	Control
T-5263_Accu	T-5263	F	55	Accumbens	HD2
T-5263_Caud	T-5263	F	55	Caudate	HD2
T-5263_Cing	T-5263	F	55	Cingulate	HD2
T-5266_Accu	T-5266	F	89	Accumbens	HD1
T-5266_Caud	T-5266	F	89	Caudate	HD1
T-5266_Cing	T-5266	F	89	Cingulate	HD1
T-5286_Caud	T-5286	F	50	Caudate	HD2
T-5286_Cing	T-5286	F	50	Cingulate	HD2
T-5382_Cing	T-5382	M	62	Cingulate	Control
T-5404_Cing	T-5404	F	54	Cingulate	Control
T-5493_Accu	T-5493	F	48	Accumbens	HD3
T-5493_Caud	T-5493	F	48	Caudate	HD3
T-5493_Cing	T-5493	F	48	Cingulate	HD3
T-5534_Accu	T-5534	F	37	Accumbens	HDJ
T-5534_Caud	T-5534	F	37	Caudate	HDJ
T-5534_Cing	T-5534	F	37	Cingulate	HDJ
T-5575_Accu	T-5575	M	71	Accumbens	HD3
T-5575_Caud	T-5575	M	71	Caudate	HD3
T-5575_Cing	T-5575	M	71	Cingulate	HD3
T-5596_Accu	T-5596	M	75	Accumbens	Control
T-5596_Caud	T-5596	M	75	Caudate	Control
T-5596_Cing	T-5596	M	75	Cingulate	Control
T-5608_Accu	T-5608	M	58	Accumbens	HD2
T-5608_Caud	T-5608	M	58	Caudate	HD2
T-5608_Cing	T-5608	M	58	Cingulate	HD2
T-5693_Accu	T-5693	F	80	Accumbens	HD2
T-5693_Caud	T-5693	F	80	Caudate	HD2
T-5693_Cing	T-5693	F	80	Cingulate	HD2
T-5700_Accu	T-5700	M	75	Accumbens	Control
T-5700_Caud	T-5700	M	75	Caudate	Control
T-5700_CC	T-5700	M	75	CC	Control
T-5700_Cing	T-5700	M	75	Cingulate	Control
T-5714_Accu	T-5714	F	29	Accumbens	HD4
T-5714_Caud	T-5714	F	29	Caudate	HD4
T-5714_Cing	T-5714	F	29	Cingulate	HD4
T-5775_Caud	T-5775	M	30	Caudate	HDJ
T-5775_Cing	T-5775	M	30	Cingulate	HDJ
T-5798_Caud	T-5798	F	57	Caudate	HD1
T-5798_Cing	T-5798	F	57	Cingulate	HD1
T-98_Cing	T-98	M	55	Cingulate	Control

## Sheet: Cells_per_lineage_sample
Sample	Astrocyte	Ependymal	Microglial	Neuron	Oligodendroyte	OPC	Vascular
T-178_Cing	658	0	1	2811	555	280	19
T-180_Cing	533	0	0	1811	551	262	13
T-1905_Cing	1436	0	5	2501	435	768	49
T-4110_Cing	946	0	150	3606	722	364	61
T-4161_Accu	447	0	63	1657	355	216	10
T-4161_Caud	602	491	81	593	586	160	6
T-4161_Cing	221	0	6	3106	89	306	13
T-4273_Caud	682	1193	15	101	3864	40	5
T-4273_Cing	1276	0	1	2092	231	483	25
T-4285_Accu	785	0	0	1930	338	70	11
T-4285_Caud	764	306	2	666	609	105	28
T-4285_Cing	655	0	4	840	419	147	39
T-4638_Accu	1800	0	19	883	5470	106	57
T-4638_Caud	1573	1515	15	82	2099	192	33
T-4638_Cing	1668	0	3	3928	809	561	59
T-4812_Caud	402	919	452	1418	3055	334	27
T-4915_Accu	1209	0	7	2233	2413	556	40
T-4915_Caud	1168	1183	8	935	2603	399	39
T-4915_Cing	1367	0	4	2506	438	483	59
T-4931_Cing	588	0	3	4555	507	716	5
T-5109_Accu	561	0	157	281	596	104	7
T-5109_Caud	746	176	0	1	2	0	0
T-5109_Cing	167	0	42	972	392	94	4
T-5227_Accu	232	0	66	1464	857	187	6
T-5227_Caud	418	833	105	960	1271	130	5
T-5227_Cing	277	0	31	2469	238	222	7
T-5263_Accu	413	0	9	3315	180	312	8
T-5263_Caud	384	2592	90	2041	1186	300	14
T-5263_Cing	378	0	11	3588	226	304	10
T-5266_Accu	1740	0	21	2101	3814	575	76
T-5266_Caud	1048	1268	14	411	4084	250	13
T-5266_Cing	664	0	0	2564	946	297	46
T-5286_Caud	1090	889	2	251	3633	296	66
T-5286_Cing	1930	0	41	7305	812	994	53
T-5382_Cing	193	0	38	498	115	46	3
T-5404_Cing	261	0	12	558	203	60	2
T-5493_Accu	205	0	76	118	1443	60	7
T-5493_Caud	70	29	64	38	1181	57	3
T-5493_Cing	502	0	54	892	553	133	17
T-5534_Accu	667	0	10	442	5563	189	6
T-5534_Caud	612	983	2	324	2924	145	11
T-5534_Cing	1362	0	1	3496	1228	480	22
T-5575_Accu	69	0	57	23	366	20	0
T-5575_Caud	82	105	170	121	793	42	0
T-5575_Cing	78	0	17	127	407	12	5
T-5596_Accu	70	0	42	297	330	41	0
T-5596_Caud	205	318	102	106	421	50	9
T-5596_Cing	221	0	101	1969	216	175	6
T-5608_Accu	567	0	155	2019	445	225	10
T-5608_Caud	176	107	0	0	1	1	0
T-5608_Cing	464	0	91	2526	133	253	6
T-5693_Accu	3363	0	18	1447	2820	670	56
T-5693_Caud	2043	340	6	231	1851	327	56
T-5693_Cing	983	0	5	3003	757	346	42
T-5700_Accu	55	0	36	125	614	46	0
T-5700_Caud	108	253	32	236	758	50	0
T-5700_CC	192	38	6	33	8883	274	0
T-5700_Cing	282	0	45	1728	661	151	4
T-5714_Accu	2598	0	35	1073	1843	388	57
T-5714_Caud	1037	1055	34	351	4018	69	23
T-5714_Cing	2003	0	10	3816	1084	705	49
T-5775_Caud	687	1558	10	15	3660	27	7
T-5775_Cing	1540	0	0	3869	931	495	33
T-5798_Caud	1662	1481	7	177	1646	281	39
T-5798_Cing	1572	0	4	3085	1023	543	89
T-98_Cing	654	0	1	7358	373	634	23

## Sheet: CAG
Sample2	Donor	CAG	Region
T-4285_Cing	T-4285	CAG_40-19	Cingulate
T-4931_Cing	T-4931	Control	Cingulate
T-4273_Cing	T-4273	CAG_48-18	Cingulate
T-5266_Cing	T-5266	CAG_40-19	Cingulate
T-98_Cing	T-98	Control	Cingulate
T-5286_Cing	T-5286	CAG_44-18	Cingulate
T-4915_Accu	T-4915	Control	Accumbens
T-178_Cing	T-178	CAG_52-20	Cingulate
T-1905_Cing	T-1905	CAG_71-20	Cingulate
T-5534_Accu	T-5534	CAG_58-17	Accumbens
T-4638_Cing	T-4638	CAG_52-18	Cingulate
T-5775_Cing	T-5775	CAG_65-16	Cingulate
T-5714_Accu	T-5714	CAG_63-17	Accumbens
T-4638_Accu	T-4638	CAG_52-18	Accumbens
T-5714_Cing	T-5714	CAG_63-17	Cingulate
T-5534_Cing	T-5534	CAG_58-17	Cingulate
T-4110_Cing	T-4110	CAG_49-18	Cingulate
T-4285_Accu	T-4285	CAG_40-19	Accumbens
T-5693_Cing	T-5693	CAG_42-15	Cingulate
T-5266_Accu	T-5266	CAG_40-19	Accumbens
T-5693_Accu	T-5693	CAG_42-15	Accumbens
T-4915_Cing	T-4915	Control	Cingulate
T-5798_Cing	T-5798	CAG_47-19	Cingulate
T-180_Cing	T-180	Control	Cingulate
T-5382_Cing	T-5382	Control	Cingulate
T-5404_Cing	T-5404	Control	Cingulate
T-5493_Cing	T-5493	CAG_46-25	Cingulate
T-5575_Cing	T-5575	CAG_44-18	Cingulate
T-5700_Accu	T-5700	Control	Accumbens
T-5493_Accu	T-5493	CAG_46-25	Accumbens
T-5596_Accu	T-5596	Control	Accumbens
T-5575_Accu	T-5575	CAG_44-18	Accumbens
T-4161_Accu	T-4161	CAG_46-18	Accumbens
T-5109_Accu	T-5109	CAG_43-15	Accumbens
T-5227_Accu	T-5227	Control	Accumbens
T-5263_Accu	T-5263	CAG_45-30	Accumbens
T-5608_Accu	T-5608	CAG_44-20	Accumbens
T-4161_Cing	T-4161	CAG_46-18	Cingulate
T-5109_Cing	T-5109	CAG_43-15	Cingulate
T-5227_Cing	T-5227	Control	Cingulate
T-5263_Cing	T-5263	CAG_45-30	Cingulate
T-5608_Cing	T-5608	CAG_44-20	Cingulate
T-5596_Cing	T-5596	Control	Cingulate
T-5700_Cing	T-5700	Control	Cingulate
T-5700_CC	T-5700	Control	CC
T-5534_Caud	T-5534	CAG_58-17	Caudate
T-5714_Caud	T-5714	CAG_63-17	Caudate
T-4638_Caud	T-4638	CAG_52-18	Caudate
T-5775_Caud	T-5775	CAG_65-16	Caudate
T-5693_Caud	T-5693	CAG_42-15	Caudate
T-4273_Caud	T-4273	CAG_48-18	Caudate
T-4285_Caud	T-4285	CAG_40-19	Caudate
T-4915_Caud	T-4915	Control	Caudate
T-5286_Caud	T-5286	CAG_44-18	Caudate
T-5798_Caud	T-5798	CAG_47-19	Caudate
T-5266_Caud	T-5266	CAG_40-19	Caudate
T-5700_Caud	T-5700	Control	Caudate
T-5493_Caud	T-5493	CAG_46-25	Caudate
T-5596_Caud	T-5596	Control	Caudate
T-5575_Caud	T-5575	CAG_44-18	Caudate
T-4161_Caud	T-4161	CAG_46-18	Caudate
T-4812_Caud	T-4812	Control	Caudate
T-5227_Caud	T-5227	Control	Caudate
T-5263_Caud	T-5263	CAG_45-30	Caudate
T-5608_Caud	T-5608	CAG_44-20	Caudate
T-5109_Caud	T-5109	CAG_43-15	Caudate
