# Supplementary material for: Huntington disease oligodendrocyte maturation deficits revealed by single-nucleus RNAseq are rescued by thiamine-biotin supplementation
Source: Nat Commun. 2022 Dec 21;13:7791. doi: 10.1038/s41467-022-35388-x (PMC9772349; doi:10.1038/s41467-022-35388-x)
Supplement: Supplementary file 9 — Supplementary Dataset 7 [file 41467_2022_35388_MOESM9_ESM.xlsx]

## Sheet: cluster_markers
	gene_id	gene_short_name	cell_group	marker_score	mean_expression	fraction_expressing	specificity	pseudo_R2	marker_test_p_value	marker_test_q_value
1	ZNF638	ZNF638	1	0.221772	1.78788	0.977566	0.226862	0.0995633	0	0
2	RTN4	RTN4	1	0.215501	1.95332	0.987696	0.218186	0.201883	0	0
3	SIK3	SIK3	1	0.216594	2.34556	0.995854	0.217496	0.0608837	0	0
4	TMEM165	TMEM165	1	0.212152	1.83369	0.959727	0.221054	0.0855605	0	0
5	SH3GL3	SH3GL3	1	0.259219	1.7683	0.931174	0.278378	0.158126	0	0
6	SEPT7	SEPT7	1	0.211862	2.12738	0.991349	0.21371	0.106793	0	0
7	SRPK2	SRPK2	1	0.212963	1.46734	0.933012	0.228254	0.0776756	0	0
8	GNAO1	GNAO1	1	0.246818	1.46112	0.89879	0.274611	0.175288	0	0
9	MAPT	MAPT	1	0.23563	1.49373	0.912169	0.258318	0.159882	0	0
10	DNAJC6	DNAJC6	1	0.238625	1.65309	0.932833	0.255807	0.103305	0	0
11	SPOCK1	SPOCK1	1	0.225524	2.28557	0.973263	0.23172	0.10201	0	0
12	LIMCH1	LIMCH1	1	0.283961	2.00304	0.974675	0.291339	0.265311	0	0
13	SLC24A2	SLC24A2	1	0.232032	2.70188	0.993747	0.233492	0.159854	0	0
14	SORT1	SORT1	1	0.262347	2.18094	0.991349	0.264636	0.264087	0	0
15	PXK	PXK	1	0.239794	1.684	0.924787	0.259297	0.162705	0	0
16	FP236383.2	FP236383.2	1	0.233784	3.31189	1	0.233784	0.285516	0	0
17	GAB1	GAB1	1	0.228526	2.04729	0.977409	0.233808	0.0990604	0	0
18	SHTN1	SHTN1	1	0.258344	1.70546	0.952779	0.271147	0.203102	0	0
19	GRM3	GRM3	1	0.255389	1.56114	0.892896	0.286023	0.167645	0	0
20	ANK2	ANK2	1	0.217128	1.89968	0.975997	0.222467	0.0616297	0	0
21	NCOA7	NCOA7	1	0.22767	1.22	0.81403	0.279683	0.129885	0	0
22	MBNL2	MBNL2	1	0.238446	1.55186	0.949059	0.251244	0.133632	0	0
23	ELMO1	ELMO1	1	0.252118	2.49375	0.995114	0.253356	0.242554	0	0
24	SPTBN1	SPTBN1	1	0.213635	1.19417	0.87472	0.244233	0.0949966	0	0
25	FAM107B	FAM107B	1	0.216609	1.35033	0.849036	0.255123	0.0823523	0	0
26	DIP2C	DIP2C	1	0.250344	2.01773	0.988346	0.253295	0.196322	0	0
27	KIF1B	KIF1B	1	0.224906	1.60144	0.967571	0.232444	0.109553	0	0
28	PRUNE2	PRUNE2	1	0.235731	1.66711	0.929852	0.253515	0.132397	0	0
29	ARAP2	ARAP2	1	0.246782	2.1704	0.989063	0.249511	0.163883	0	0
30	ATP8A1	ATP8A1	1	0.243141	1.86443	0.963312	0.252401	0.135229	0	0
31	NUTM2A-AS1	NUTM2A-AS1	1	0.214128	1.33037	0.884626	0.242055	0.0698288	0	0
32	MAP4K4	MAP4K4	1	0.223628	2.00907	0.986889	0.226599	0.124711	0	0
33	PICALM	PICALM	1	0.221568	1.65769	0.954998	0.232009	0.124366	0	0
34	FUT8	FUT8	1	0.235159	1.73419	0.945944	0.248597	0.0854374	0	0
35	PEX5L	PEX5L	1	0.277299	2.31567	0.985657	0.281334	0.277354	0	0
36	FP671120.4	FP671120.4	1	0.264498	2.48225	0.993142	0.266324	0.288922	0	0
37	TRIM2	TRIM2	1	0.215231	1.76846	0.962371	0.223646	0.0628129	0	0
38	RAPGEF5	RAPGEF5	1	0.222234	1.33008	0.86784	0.256077	0.0957214	0	0
39	ST6GALNAC3	ST6GALNAC3	1	0.241873	1.65698	0.884222	0.273543	0.142383	0	0
40	CCDC88A	CCDC88A	1	0.218822	1.64118	0.947893	0.230851	0.0897332	0	0
41	MAP7	MAP7	1	0.242747	2.38334	0.991394	0.244854	0.22651	0	0
42	RNF220	RNF220	1	0.260234	2.39976	0.976625	0.266463	0.203217	0	0
43	TBC1D5	TBC1D5	1	0.212583	1.56927	0.928082	0.229057	0.0860499	0	0
44	PIP4K2A	PIP4K2A	1	0.212196	3.05432	0.999798	0.212239	0.139928	0	0
45	AKAP6	AKAP6	1	0.217624	1.67068	0.951546	0.228706	0.0571246	0	0
46	ANLN	ANLN	1	0.235955	1.51291	0.87602	0.269349	0.156602	0	0
47	SPOCK3	SPOCK3	1	0.235148	2.27011	0.982048	0.239446	0.145339	0	0
48	CNTNAP2	CNTNAP2	1	0.212613	1.7902	0.858068	0.247781	0.0784192	0	0
49	ADIPOR2	ADIPOR2	1	0.221152	1.39594	0.853182	0.259208	0.0957059	0	0
50	DLG1	DLG1	1	0.222243	2.28627	0.99052	0.22437	0.0975884	0	0
51	EXOC6B	EXOC6B	1	0.228739	1.80882	0.971717	0.235397	0.0789707	0	0
52	PHLPP1	PHLPP1	1	0.231909	2.55178	0.996638	0.232691	0.129344	0	0
53	ARHGAP21	ARHGAP21	1	0.212053	1.9554	0.987158	0.214811	0.0982517	0	0
54	CPQ	CPQ	1	0.217791	1.17732	0.780883	0.278903	0.106295	0	0
55	AUTS2	AUTS2	1	0.233608	2.08422	0.970775	0.24064	0.104721	0	0
56	PTPRK	PTPRK	1	0.231922	2.02184	0.977768	0.237196	0.10459	0	0
57	HIPK2	HIPK2	1	0.218173	1.46868	0.903115	0.241579	0.075823	0	0
58	FMNL2	FMNL2	1	0.229378	2.37346	0.997176	0.230027	0.181651	0	0
59	ENOX1	ENOX1	1	0.256253	1.73308	0.918602	0.27896	0.146506	0	0
60	CDK19	CDK19	1	0.231456	2.0152	0.968826	0.238904	0.0968348	0	0
61	PTPRD	PTPRD	1	0.212985	2.6674	0.998117	0.213387	0.106492	0	0
62	DIP2B	DIP2B	1	0.239721	2.2587	0.994016	0.241164	0.163887	0	0
63	TMTC2	TMTC2	1	0.273999	2.58324	0.992784	0.27599	0.225763	0	0
64	MAGI2	MAGI2	1	0.214429	3.04923	0.999283	0.214582	0.111591	0	0
65	AGTPBP1	AGTPBP1	1	0.212883	1.3265	0.843366	0.252421	0.0534204	0	0
66	KLHL32	KLHL32	1	0.214202	1.58066	0.880323	0.243322	0.0387865	0	0
67	FXR1	FXR1	1	0.216715	1.16888	0.827387	0.261927	0.137618	0	0
68	ZNF536	ZNF536	1	0.243738	1.82274	0.928911	0.262391	0.0992509	0	0
69	OTUD7A	OTUD7A	1	0.243703	1.66583	0.920619	0.264716	0.106042	0	0
70	DOCK10	DOCK10	1	0.222359	2.20592	0.979359	0.227045	0.0768827	0	0
71	MYO6	MYO6	1	0.216708	1.31888	0.887517	0.244173	0.0716211	0	0
72	NEO1	NEO1	1	0.23249	1.38584	0.893456	0.260214	0.121964	0	0
73	UNC5C	UNC5C	1	0.22232	1.83979	0.935657	0.237609	0.0516175	0	0
74	NFASC	NFASC	1	0.243225	1.86063	0.970081	0.250727	0.17406	0	0
75	FP236383.3	FP236383.3	1	0.220833	1.26999	0.825123	0.267636	0.11234	0	0
76	SGK3	SGK3	1	0.221855	1.2915	0.851546	0.260532	0.106172	0	0
77	C9orf3	C9orf3	1	0.217354	1.52027	0.931645	0.233302	0.0825116	0	0
78	FRMD4B	FRMD4B	1	0.226257	1.80575	0.930636	0.243121	0.0861642	0	0
79	MAP4K5	MAP4K5	1	0.228596	1.71744	0.959502	0.238244	0.121553	0	0
80	DOCK5	DOCK5	1	0.212107	2.14496	0.97017	0.218628	0.112358	0	0
81	NKAIN2	NKAIN2	1	0.245537	1.99896	0.931712	0.263533	0.109862	0	0
82	PDE1C	PDE1C	1	0.230007	1.96878	0.93597	0.245742	0.0681428	0	0
83	PLCL1	PLCL1	1	0.250332	2.2402	0.963402	0.259841	0.134421	0	0
84	KIRREL3	KIRREL3	1	0.266221	1.92417	0.934671	0.284829	0.158205	0	0
85	SLC39A11	SLC39A11	1	0.246058	1.28997	0.837001	0.293975	0.162489	0	0
86	FRYL	FRYL	1	0.238483	2.51414	0.996795	0.239249	0.197132	0	0
87	ERBIN	ERBIN	1	0.257356	2.64558	0.998678	0.257697	0.23901	0	0
88	TJP1	TJP1	1	0.21856	1.88078	0.979045	0.223238	0.0685746	0	0
89	PDE8A	PDE8A	1	0.224289	1.5269	0.901726	0.248733	0.0878852	0	0
90	FBXL7	FBXL7	1	0.216364	1.60548	0.879247	0.246079	0.0631858	0	0
91	NCKAP5	NCKAP5	1	0.220793	2.1243	0.953003	0.231681	0.0714571	0	0
92	CTNNA3	CTNNA3	1	0.24714	2.40339	0.954594	0.258895	0.0989405	0	0
93	ST18	ST18	1	0.255059	2.69373	0.981152	0.259959	0.196103	0	0
94	CLMN	CLMN	1	0.261258	1.73474	0.921246	0.283591	0.185654	0	0
95	MAN2A1	MAN2A1	1	0.261599	2.72055	0.991103	0.263947	0.214492	0	0
96	FP671120.1	FP671120.1	1	0.252944	3.40038	0.999866	0.252978	0.305245	0	0
97	FRMD5	FRMD5	1	0.247936	2.76502	0.997445	0.248571	0.17998	0	0
98	HFM1	HFM1	1	0.265138	1.82607	0.939332	0.282262	0.211494	0	0
99	KDM6A	KDM6A	1	0.213352	1.2798	0.862976	0.247228	0.0629694	0	0
100	DPYD	DPYD	1	0.24445	1.56257	0.888974	0.27498	0.119	0	0
101	NRXN3	NRXN3	2	0.209798	1.85443	0.905557	0.231679	0.0263652	0	0
102	SIK3	SIK3	2	0.226435	2.47785	0.998824	0.226702	0.0588859	0	0
103	TMEM165	TMEM165	2	0.241876	2.09177	0.990589	0.244173	0.109754	0	0
104	SH3GL3	SH3GL3	2	0.241058	1.62332	0.923818	0.260937	0.0361029	0	0
105	SEPT7	SEPT7	2	0.212754	2.13057	0.994398	0.213952	0.0489471	0	0
106	CDC42BPA	CDC42BPA	2	0.215108	1.70508	0.975185	0.220582	0.0358404	0	0
107	DNAJC6	DNAJC6	2	0.239504	1.61818	0.95149	0.251714	0.0447802	0	0
108	LIMCH1	LIMCH1	2	0.211501	1.45247	0.925667	0.228486	0.00648176	1.44351e-84	1.71323e-79
109	PDE1A	PDE1A	2	0.276051	1.23613	0.705635	0.39121	0.200856	0	0
110	SORT1	SORT1	2	0.223917	1.7971	0.979386	0.22863	0.0193628	1.18207e-249	1.40294e-244
111	KCNMB4	KCNMB4	2	0.263909	1.52708	0.922978	0.285932	0.102918	0	0
112	EPS15	EPS15	2	0.274737	1.4442	0.940063	0.292254	0.146273	0	0
113	SHTN1	SHTN1	2	0.216357	1.38806	0.932276	0.232074	0.0206847	1.16353e-266	1.38093e-261
114	ANK2	ANK2	2	0.22802	1.97587	0.994959	0.229175	0.0627267	0	0
115	PLEKHH1	PLEKHH1	2	0.283503	1.44195	0.950874	0.29815	0.144042	0	0
116	PTBP2	PTBP2	2	0.222905	1.61327	0.964318	0.231153	0.0539171	0	0
117	ELMO1	ELMO1	2	0.210288	1.98572	0.985884	0.213299	0.0110963	1.38184e-143	1.64003e-138
118	LPGAT1	LPGAT1	2	0.266582	1.52743	0.934125	0.285381	0.120624	0	0
119	FAM107B	FAM107B	2	0.238737	1.39641	0.912335	0.261677	0.0601953	0	0
120	PPM1H	PPM1H	2	0.23474	1.0842	0.818004	0.286967	0.0645759	0	0
121	PRUNE2	PRUNE2	2	0.215975	1.45901	0.942191	0.229226	0.0249465	1.39326512127232e-321	1.65359670918205e-316
122	ARAP2	ARAP2	2	0.226436	1.93858	0.988349	0.229105	0.0249475	1.3487992131466e-321	1.60082234612305e-316
123	POLR2F	POLR2F	2	0.236798	1.19496	0.862256	0.274626	0.0668549	0	0
124	ATP8A1	ATP8A1	2	0.228402	1.70553	0.967903	0.235976	0.0317561	0	0
125	FGFR2	FGFR2	2	0.225864	1.06258	0.827638	0.272902	0.0756881	0	0
126	ENPP2	ENPP2	2	0.218274	1.56182	0.9595	0.227487	0.0603168	0	0
127	ARHGAP23	ARHGAP23	2	0.213176	0.857187	0.78445	0.271753	0.0513988	0	0
128	FUT8	FUT8	2	0.233482	1.7142	0.947457	0.24643	0.0318731	0	0
129	HHIP	HHIP	2	0.221959	1.16218	0.818508	0.271176	0.0905614	0	0
130	PTK2	PTK2	2	0.231115	2.20377	0.995855	0.232077	0.107874	0	0
131	TRIM2	TRIM2	2	0.224076	1.82265	0.97933	0.228805	0.0458976	0	0
132	PPP2R2B	PPP2R2B	2	0.22318	2.73604	0.996359	0.223995	0.0813921	0	0
133	RAPGEF5	RAPGEF5	2	0.239705	1.36926	0.915752	0.261758	0.0618351	0	0
134	ST6GALNAC3	ST6GALNAC3	2	0.239722	1.61091	0.89525	0.267771	0.0515701	0	0
135	MAP7	MAP7	2	0.212312	2.00993	0.98622	0.215278	0.0287809	0	0
136	RNF220	RNF220	2	0.237298	2.10293	0.983979	0.241161	0.0448082	0	0
137	SLCO1A2	SLCO1A2	2	0.221866	1.12808	0.858111	0.258552	0.0417236	0	0
138	MICAL3	MICAL3	2	0.211568	0.993992	0.809881	0.261233	0.0352014	0	0
139	AKAP6	AKAP6	2	0.21969	1.64351	0.972552	0.225891	0.0318664	0	0
140	FNBP1	FNBP1	2	0.238525	1.37952	0.928635	0.256855	0.0880133	0	0
141	DLG1	DLG1	2	0.215233	2.17872	0.994847	0.216347	0.0257104	0	0
142	EXOC6B	EXOC6B	2	0.235287	1.85768	0.97961	0.240184	0.0487053	0	0
143	PHLPP1	PHLPP1	2	0.211344	2.26004	0.995519	0.212295	0.0080594	9.84668e-105	1.16865e-99
144	MTUS1	MTUS1	2	0.260663	1.49803	0.921241	0.282948	0.113506	0	0
145	AUTS2	AUTS2	2	0.222216	1.96067	0.967063	0.229785	0.0255943	0	0
146	PTPRK	PTPRK	2	0.224578	1.92119	0.984035	0.228221	0.0313112	0	0
147	CDK19	CDK19	2	0.230598	1.9956	0.972384	0.237147	0.0373191	0	0
148	SNX30	SNX30	2	0.219804	1.02348	0.802487	0.273903	0.0855408	0	0
149	DIP2B	DIP2B	2	0.227922	2.11747	0.992326	0.229685	0.0322499	0	0
150	TMTC2	TMTC2	2	0.244442	2.23709	0.987452	0.247548	0.03849	0	0
151	AGTPBP1	AGTPBP1	2	0.243012	1.43876	0.905389	0.268406	0.0586328	0	0
152	GRID1	GRID1	2	0.216082	1.62211	0.937822	0.230408	0.040574	0	0
153	KLHL32	KLHL32	2	0.244037	1.7094	0.945328	0.25815	0.0612122	0	0
154	ZNF536	ZNF536	2	0.268717	1.92037	0.984484	0.272952	0.0914121	0	0
155	OTUD7A	OTUD7A	2	0.239766	1.57628	0.944376	0.253889	0.0423115	0	0
156	RYBP	RYBP	2	0.2282	1.27613	0.877549	0.260042	0.042371	0	0
157	MYO6	MYO6	2	0.214433	1.26639	0.905557	0.236797	0.0260002	0	0
158	TECPR2	TECPR2	2	0.26601	0.990639	0.81806	0.325172	0.148704	0	0
159	OPALIN	OPALIN	2	0.231688	1.18517	0.772462	0.299935	0.179577	0	0
160	UNC5C	UNC5C	2	0.239226	1.95689	0.960957	0.248946	0.0492934	0	0
161	NFASC	NFASC	2	0.219555	1.63288	0.966446	0.227177	0.0270567	0	0
162	LSS	LSS	2	0.211805	0.718488	0.700314	0.302444	0.0896896	0	0
163	ABHD17B	ABHD17B	2	0.222868	0.862199	0.746471	0.298562	0.100482	0	0
164	FRMD4B	FRMD4B	2	0.222915	1.69943	0.959892	0.232229	0.0334035	0	0
165	ZNF644	ZNF644	2	0.212178	1.07324	0.833296	0.254625	0.0500328	0	0
166	PALM2	PALM2	2	0.255501	1.2833	0.830495	0.307649	0.0929244	0	0
167	ITCH	ITCH	2	0.209819	1.07029	0.855254	0.245329	0.0366251	0	0
168	NKAIN2	NKAIN2	2	0.26244	2.0934	0.961685	0.272896	0.0763927	0	0
169	PDE1C	PDE1C	2	0.239716	1.98296	0.970199	0.247079	0.0501354	0	0
170	MVB12B	MVB12B	2	0.212269	1.11953	0.832064	0.255111	0.0320157	0	0
171	PLCL1	PLCL1	2	0.220529	1.93102	0.949473	0.232264	0.0149105	1.81881e-192	2.15866e-187
172	KIRREL3	KIRREL3	2	0.288561	2.03576	0.970704	0.29727	0.107903	0	0
173	FRYL	FRYL	2	0.21847	2.24336	0.995239	0.219515	0.028226	0	0
174	KCNH8	KCNH8	2	0.216566	1.39626	0.921745	0.234952	0.0433321	0	0
175	ERBIN	ERBIN	2	0.225532	2.22862	0.996247	0.226382	0.0190066	4.5036e-245	5.34509e-240
176	CNTNAP4	CNTNAP4	2	0.292341	1.60631	0.913679	0.31996	0.159372	0	0
177	WDPCP	WDPCP	2	0.214159	1.09812	0.783778	0.273239	0.058909	0	0
178	TJP1	TJP1	2	0.214653	1.82163	0.985044	0.217912	0.0242432	1.64431475388609e-312	1.95155e-307
179	PDE8A	PDE8A	2	0.22408	1.50993	0.908526	0.246642	0.0300366	0	0
180	IGSF11	IGSF11	2	0.214562	1.01916	0.794309	0.270124	0.0325119	0	0
181	PHLDB1	PHLDB1	2	0.2494	1.02276	0.841474	0.296384	0.14807	0	0
182	MOG	MOG	2	0.225073	1.03441	0.857663	0.262426	0.108213	0	0
183	PSEN1	PSEN1	2	0.242852	1.22296	0.896314	0.270945	0.0978898	0	0
184	IQGAP1	IQGAP1	2	0.222715	1.01969	0.816771	0.272678	0.0548379	0	0
185	CTNNA3	CTNNA3	2	0.262063	2.47478	0.990085	0.264687	0.0796501	0	0
186	LAMA2	LAMA2	2	0.218292	1.02046	0.686478	0.317988	0.0798554	0	0
187	ENOSF1	ENOSF1	2	0.293901	0.99735	0.828983	0.354532	0.243557	0	0
188	ST18	ST18	2	0.235806	2.39897	0.990085	0.238168	0.0484225	0	0
189	CLMN	CLMN	2	0.220313	1.3876	0.919729	0.239541	0.0227316	5.05623e-293	6.00099e-288
190	MAN2A1	MAN2A1	2	0.231685	2.31664	0.991093	0.233767	0.0306237	0	0
191	COL4A5	COL4A5	2	0.292365	1.54874	0.943424	0.309898	0.179271	0	0
192	FRMD5	FRMD5	2	0.222256	2.40373	0.993894	0.223622	0.0146957	1.03676e-189	1.23048e-184
193	LINC01630	LINC01630	2	0.214768	0.768818	0.642001	0.33453	0.104135	0	0
194	LINC00320	LINC00320	2	0.220392	1.10653	0.829711	0.265625	0.0706209	0	0
195	ZNF708	ZNF708	2	0.227248	1.00711	0.79907	0.284391	0.0807335	0	0
196	LPAR1	LPAR1	2	0.273012	1.66472	0.948185	0.287932	0.115443	0	0
197	KDM6A	KDM6A	2	0.243824	1.41334	0.914968	0.266484	0.0658122	0	0
198	DPYD	DPYD	2	0.2369	1.44512	0.913959	0.259202	0.0406172	0	0
199	FOLH1	FOLH1	2	0.210206	0.893502	0.760531	0.276393	0.050649	0	0
200	LINC01608	LINC01608	2	0.227414	1.08599	0.802767	0.283287	0.0577419	0	0
201	QDPR	QDPR	3	0.190461	1.81463	0.889309	0.214167	0.0305909	0	0
202	NRXN3	NRXN3	3	0.187438	1.92957	0.785133	0.238734	0.000772902	5.92717e-11	7.03467e-06
203	DNM3	DNM3	3	0.188659	2.09635	0.945534	0.199526	0.00267523	3.91912e-34	4.65141e-29
204	QKI	QKI	3	0.207369	3.62475	0.998632	0.207654	0.0755551	0	0
205	SIK3	SIK3	3	0.218854	2.4791	0.965014	0.226788	0.009423	6.68676e-116	7.93618e-111
206	TMEM165	TMEM165	3	0.225374	2.04582	0.938628	0.240111	0.0358311	0	0
207	PCDH9	PCDH9	3	0.188746	4.3983	0.998502	0.189029	0.102257	0	0
208	SH3GL3	SH3GL3	3	0.212219	1.61243	0.817447	0.259612	0.00345841	1.24692e-43	1.47991e-38
209	SEPT7	SEPT7	3	0.205676	2.15747	0.952244	0.215991	0.013523	1.1732e-165	1.39242e-160
210	NCAM2	NCAM2	3	0.206389	3.17479	0.979543	0.210699	0.00902091	5.01315e-111	5.94986e-106
211	DNAJC6	DNAJC6	3	0.185912	1.44151	0.805981	0.230666	0.00078291	4.46354e-11	5.29755e-06
212	SPOCK1	SPOCK1	3	0.184731	2.00885	0.878885	0.210188	0.00327702	1.97079e-41	2.33903e-36
213	LIMCH1	LIMCH1	3	0.223622	1.69505	0.870936	0.256761	0.0063662	7.39622e-79	8.77821e-74
214	TTLL7	TTLL7	3	0.197268	2.37381	0.963059	0.204834	0.036774	0	0
215	SLC24A2	SLC24A2	3	0.246456	2.94407	0.98925	0.249134	0.0817364	0	0
216	SORT1	SORT1	3	0.203355	1.74915	0.907812	0.224006	0.00021332	0.00058502	1
217	PXK	PXK	3	0.195089	1.45075	0.842074	0.231677	0.00270064	1.92665e-34	2.28665e-29
218	GAB1	GAB1	3	0.214369	2.01385	0.928334	0.230917	0.00455168	7.05728e-57	8.37593e-52
219	KCNMB4	KCNMB4	3	0.182273	1.24943	0.741938	0.245672	0.00333111	4.35448e-42	5.16811e-37
220	SHTN1	SHTN1	3	0.223808	1.58026	0.874389	0.255959	0.0153632	5.08934e-188	6.04028e-183
221	GRM3	GRM3	3	0.209194	1.41345	0.78852	0.2653	0.00771623	3.25716e-95	3.86576e-90
222	MARCH1	MARCH1	3	0.198807	2.44438	0.959737	0.207147	0.00044646	6.53941e-07	0.077613
223	MBP	MBP	3	0.19033	2.12896	0.937195	0.203084	0.0218004	2.01747e-266	2.39443e-261
224	EDIL3	EDIL3	3	0.215326	2.73735	0.987491	0.218053	0.0464291	0	0
225	AMER2	AMER2	3	0.191744	1.59261	0.870741	0.220208	0.0162275	1.56824e-198	1.86126e-193
226	DST	DST	3	0.186026	2.25846	0.971399	0.191503	0.000883823	2.56654e-12	3.0461e-07
227	ELMO1	ELMO1	3	0.240013	2.4237	0.967946	0.247961	0.0317038	0	0
228	FAM107B	FAM107B	3	0.212228	1.3767	0.819793	0.25888	0.01734	4.55751e-212	5.40908e-207
229	ANK3	ANK3	3	0.198165	2.23903	0.926966	0.213778	0.000841476	8.50139e-12	1.00899e-06
230	CLASP2	CLASP2	3	0.183309	1.9778	0.946251	0.193721	0.00218286	3.72061e-28	4.4158e-23
231	PRUNE2	PRUNE2	3	0.200966	1.51998	0.850023	0.236425	0.00386412	1.50977e-48	1.79187e-43
232	ARAP2	ARAP2	3	0.225167	2.04806	0.942863	0.238812	0.0084564	3.4901e-104	4.14222e-99
233	CADM2	CADM2	3	0.191713	3.22591	0.972181	0.197199	0.00996086	2.00997e-122	2.38553e-117
234	ATP8A1	ATP8A1	3	0.205579	1.68	0.881165	0.233303	0.00106217	1.67198e-14	1.98439e-09
235	MAP4K4	MAP4K4	3	0.19748	1.86401	0.922275	0.214123	0.000423584	1.26339e-06	0.149945
236	ENPP2	ENPP2	3	0.225149	1.74575	0.909896	0.247445	0.0489026	0	0
237	FUT8	FUT8	3	0.212036	1.70204	0.865073	0.245108	0.00271175	1.41281e-34	1.6768e-29
238	PLP1	PLP1	3	0.213867	3.38608	0.973744	0.219633	0.117659	0	0
239	PEX5L	PEX5L	3	0.245303	2.16099	0.918757	0.266994	0.0200833	1.75647e-245	2.08467e-240
240	DLG2	DLG2	3	0.202178	2.8696	0.990944	0.204026	0.0123618	1.48397e-151	1.76125e-146
241	TRIM2	TRIM2	3	0.191287	1.69002	0.885139	0.21611	9.62819e-06	0.465097	1
242	PPP2R2B	PPP2R2B	3	0.210975	2.75438	0.937129	0.225129	0.00961036	3.57666e-118	4.24496e-113
243	MAP7	MAP7	3	0.240992	2.41117	0.975634	0.247011	0.0589802	0	0
244	RNF220	RNF220	3	0.26407	2.51928	0.955241	0.276443	0.0545077	0	0
245	SLCO1A2	SLCO1A2	3	0.216662	1.24262	0.778878	0.278172	0.0250037	1.53098e-305	1.81705e-300
246	PIP4K2A	PIP4K2A	3	0.225442	3.32314	0.996612	0.226209	0.0888022	0	0
247	ANLN	ANLN	3	0.211666	1.44242	0.814711	0.259805	0.0175038	4.62974e-214	5.4948e-209
248	SPOCK3	SPOCK3	3	0.222276	2.22134	0.943645	0.23555	0.0126655	3.04506e-155	3.61403e-150
249	ZEB2	ZEB2	3	0.19213	1.86489	0.893804	0.214957	0.00146417	2.06084e-19	2.4459e-14
250	ADIPOR2	ADIPOR2	3	0.192693	1.31369	0.778292	0.247584	0.00487398	8.79744e-61	1.04412e-55
251	DLG1	DLG1	3	0.217765	2.32256	0.959085	0.227055	0.0133794	6.52037e-164	7.7387e-159
252	PHLPP1	PHLPP1	3	0.23089	2.59962	0.978435	0.235979	0.0225438	1.70518e-275	2.02379e-270
253	TF	TF	3	0.197899	1.66146	0.884422	0.22376	0.0324974	0	0
254	ARHGAP21	ARHGAP21	3	0.184168	1.79221	0.91576	0.20111	0.000755369	9.7434e-11	1.1564e-05
255	AUTS2	AUTS2	3	0.208376	1.99339	0.895563	0.232676	0.00243105	3.60336e-31	4.27664e-26
256	PTPRK	PTPRK	3	0.215476	1.99781	0.916672	0.235063	0.00377143	2.00516e-47	2.37982e-42
257	FMNL2	FMNL2	3	0.207449	2.21143	0.951332	0.218061	0.00233223	5.70774e-30	6.77423e-25
258	ENOX1	ENOX1	3	0.186852	1.45768	0.763437	0.244751	0.000276734	8.98908e-05	1
259	PDE4B	PDE4B	3	0.20366	2.95926	0.969835	0.209994	0.008326	1.32814e-102	1.5763e-97
260	CDK19	CDK19	3	0.191808	1.78953	0.878233	0.218403	0.000629748	3.45756e-09	0.000410361
261	PTPRD	PTPRD	3	0.215113	2.74245	0.987165	0.21791	0.0223179	9.74609e-273	1.15671e-267
262	MOBP	MOBP	3	0.216618	1.91937	0.87022	0.248924	0.0475955	0	0
263	DIP2B	DIP2B	3	0.210578	2.04112	0.942602	0.2234	0.00113313	2.26558e-15	2.68891e-10
264	TMTC2	TMTC2	3	0.276172	2.70226	0.967099	0.285567	0.0606615	0	0
265	MAGI2	MAGI2	3	0.221025	3.20184	0.992703	0.22265	0.0369908	0	0
266	KLHL32	KLHL32	3	0.184056	1.47697	0.796208	0.231166	4.71572e-05	0.105957	1
267	ZNF536	ZNF536	3	0.252869	1.9383	0.91993	0.274879	0.0342625	0	0
268	DOCK10	DOCK10	3	0.217726	2.2223	0.953613	0.228317	0.00793821	6.65028e-98	7.89288e-93
269	UNC5C	UNC5C	3	0.204946	1.86626	0.85328	0.240186	0.000599198	8.25647e-09	0.000979919
270	TMEM144	TMEM144	3	0.231346	2.44906	0.970356	0.238414	0.0954921	0	0
271	FRMD4B	FRMD4B	3	0.221437	1.84283	0.896931	0.246883	0.0145266	7.51143e-178	8.91494e-173
272	UGT8	UGT8	3	0.184184	1.21508	0.772168	0.238529	0.00727002	8.30687e-90	9.85901e-85
273	DOCK5	DOCK5	3	0.217915	2.26363	0.957	0.227707	0.0358442	0	0
274	NKAIN2	NKAIN2	3	0.224602	1.99967	0.852042	0.263604	0.00901582	5.77846e-111	6.85817e-106
275	PDE1C	PDE1C	3	0.231339	2.0624	0.908919	0.25452	0.0168416	5.30365e-206	6.29463e-201
276	PLCL1	PLCL1	3	0.238297	2.27225	0.90729	0.262647	0.0148691	5.1611e-182	6.12545e-177
277	KIRREL3	KIRREL3	3	0.190122	1.54411	0.788325	0.241172	0.000153361	0.00355203	1
278	FRYL	FRYL	3	0.228371	2.47627	0.965535	0.236522	0.0226142	2.35933e-276	2.80017e-271
279	KCNH8	KCNH8	3	0.194363	1.45254	0.802919	0.242071	0.0071483	2.47807e-88	2.9411e-83
280	ERBIN	ERBIN	3	0.253535	2.66379	0.978761	0.259037	0.0481104	0	0
281	SLC44A1	SLC44A1	3	0.228312	3.36069	0.997199	0.228954	0.139721	0	0
282	CNTNAP4	CNTNAP4	3	0.181597	1.25127	0.685973	0.26473	0.00755626	2.82587e-93	3.35388e-88
283	PDE8A	PDE8A	3	0.190673	1.43624	0.802854	0.237495	0.00107306	1.23027e-14	1.46015e-09
284	NCKAP5	NCKAP5	3	0.202548	2.0666	0.892631	0.226912	0.00107747	1.08636e-14	1.28935e-09
285	ABCA8	ABCA8	3	0.191511	1.12497	0.738419	0.259353	0.0244167	2.28599e-298	2.71312e-293
286	CREB5	CREB5	3	0.192294	1.41946	0.793081	0.242465	0.0186733	2.66474e-228	3.16264e-223
287	CTNNA3	CTNNA3	3	0.283069	2.82069	0.968597	0.292246	0.0837622	0	0
288	C10orf90	C10orf90	3	0.200073	1.79862	0.897713	0.22287	0.00211314	2.61583e-27	3.1046e-22
289	ST18	ST18	3	0.277825	3.03667	0.97609	0.284631	0.0956074	0	0
290	CLMN	CLMN	3	0.227608	1.57881	0.86188	0.264084	0.0158088	1.94033e-193	2.30288e-188
291	MAN2A1	MAN2A1	3	0.260563	2.79924	0.966122	0.2697	0.0525386	0	0
292	FRMD5	FRMD5	3	0.245753	2.80039	0.979217	0.250969	0.0356577	0	0
293	IL1RAPL1	IL1RAPL1	3	0.232889	4.05073	0.998502	0.233238	0.125224	0	0
294	TCF12	TCF12	3	0.203285	2.39209	0.967946	0.210017	0.00366246	4.19404e-46	4.9777e-41
295	IGF2R	IGF2R	3	0.217096	1.57242	0.868851	0.249865	0.0610464	0	0
296	LPAR1	LPAR1	3	0.238167	1.62195	0.843638	0.282309	0.0389744	0	0
297	DPYD	DPYD	3	0.195366	1.41126	0.767346	0.2546	0.000861085	4.88185e-12	5.79402e-07
298	FOLH1	FOLH1	3	0.185613	0.947571	0.642322	0.288971	0.0200962	1.22447e-245	1.45327e-240
299	LINC01608	LINC01608	3	0.199055	1.15204	0.6719	0.296257	0.0186627	3.58575e-228	4.25574e-223
300	VRK2	VRK2	3	0.183988	1.11449	0.678611	0.271125	0.0162518	7.93826e-199	9.42152e-194
301	KCND2	KCND2	4	0.327331	1.98177	0.988707	0.33107	0.657432	0	0
302	CHL1	CHL1	4	0.336231	1.32148	0.955356	0.351944	0.61843	0	0
303	CA10	CA10	4	0.329844	1.60384	0.973443	0.338843	0.735093	0	0
304	RGS7	RGS7	4	0.302232	1.17618	0.916975	0.329596	0.375169	0	0
305	HS6ST3	HS6ST3	4	0.338933	1.41449	0.93471	0.362608	0.590463	0	0
306	UNC80	UNC80	4	0.307774	0.703603	0.769896	0.399761	0.485295	0	0
307	MAP2	MAP2	4	0.298742	1.52796	0.984472	0.303454	0.458725	0	0
308	FGF12	FGF12	4	0.306264	1.65537	0.973266	0.314676	0.569644	0	0
309	PTPRT	PTPRT	4	0.311112	1.00626	0.830422	0.374643	0.531242	0	0
310	CNTN1	CNTN1	4	0.309921	1.69141	0.988089	0.313657	0.498608	0	0
311	CDK14	CDK14	4	0.300108	1.01714	0.906829	0.330942	0.382498	0	0
312	SLC35F1	SLC35F1	4	0.308981	1.7811	0.981119	0.314927	0.674104	0	0
313	PLCB1	PLCB1	4	0.308578	1.38116	0.969031	0.31844	0.43962	0	0
314	NTRK3	NTRK3	4	0.33578	1.21566	0.950503	0.353266	0.533645	0	0
315	CACNA1A	CACNA1A	4	0.28731	1.07149	0.908417	0.316275	0.473886	0	0
316	PTPRZ1	PTPRZ1	4	0.302133	2.26362	0.997618	0.302854	0.706317	0	0
317	RAPGEF4	RAPGEF4	4	0.302144	0.935894	0.864479	0.34951	0.46287	0	0
318	PRRX1	PRRX1	4	0.286507	0.701305	0.742721	0.385753	0.511394	0	0
319	FLRT2	FLRT2	4	0.315678	0.998208	0.866508	0.364311	0.412167	0	0
320	ASTN1	ASTN1	4	0.324416	0.937141	0.889095	0.364883	0.460701	0	0
321	XKR4	XKR4	4	0.30206	0.956125	0.80457	0.37543	0.533874	0	0
322	SORCS3	SORCS3	4	0.349954	1.04665	0.896859	0.390199	0.648228	0	0
323	C1orf21	C1orf21	4	0.309995	0.944297	0.871008	0.355904	0.554171	0	0
324	SHISA9	SHISA9	4	0.29174	0.873756	0.775366	0.376261	0.494601	0	0
325	HECW1	HECW1	4	0.314922	0.804791	0.81807	0.384958	0.546182	0	0
326	NEBL	NEBL	4	0.321899	1.14803	0.93171	0.345492	0.380408	0	0
327	DLGAP1	DLGAP1	4	0.311538	1.67561	0.991971	0.31406	0.519446	0	0
328	FGF14	FGF14	4	0.316284	2.14427	0.996118	0.317517	0.628625	0	0
329	SEZ6L	SEZ6L	4	0.32099	1.15661	0.900476	0.356467	0.644691	0	0
330	TMEM132C	TMEM132C	4	0.29001	1.3593	0.947591	0.306049	0.409304	0	0
331	MTSS1L	MTSS1L	4	0.306581	1.27706	0.936298	0.32744	0.503175	0	0
332	NRCAM	NRCAM	4	0.314294	1.91805	0.994089	0.316163	0.626823	0	0
333	ARPP21	ARPP21	4	0.28738	1.17524	0.938239	0.306297	0.35457	0	0
334	RIMS2	RIMS2	4	0.304489	1.08563	0.881595	0.345384	0.367273	0	0
335	OPHN1	OPHN1	4	0.304957	1.65671	0.983325	0.310129	0.547238	0	0
336	STXBP5L	STXBP5L	4	0.32178	0.952447	0.879919	0.365693	0.373812	0	0
337	TMEM132B	TMEM132B	4	0.311568	0.950245	0.867655	0.359093	0.394691	0	0
338	LRRTM4	LRRTM4	4	0.286517	2.39522	0.9985	0.286948	0.527318	0	0
339	ATRNL1	ATRNL1	4	0.32776	1.92429	0.993118	0.330031	0.624833	0	0
340	NOL4	NOL4	4	0.308277	0.874149	0.853538	0.361175	0.466865	0	0
341	PCDH7	PCDH7	4	0.324096	1.45123	0.965149	0.335799	0.552915	0	0
342	FAM155A	FAM155A	4	0.319045	1.80604	0.985354	0.323787	0.575299	0	0
343	OPCML	OPCML	4	0.308981	2.59068	0.999912	0.309008	0.677496	0	0
344	ZEB1	ZEB1	4	0.311658	1.33105	0.95712	0.32562	0.618618	0	0
345	PID1	PID1	4	0.330353	1.20912	0.933739	0.353796	0.674482	0	0
346	TNR	TNR	4	0.311124	2.49916	0.999471	0.311288	0.737136	0	0
347	MPPED2	MPPED2	4	0.309686	0.84339	0.828922	0.373601	0.593855	0	0
348	RORA	RORA	4	0.302636	1.91006	0.993383	0.304652	0.528267	0	0
349	DPP10	DPP10	4	0.290719	1.50313	0.983413	0.295623	0.39232	0	0
350	SOX6	SOX6	4	0.328995	1.83863	0.990648	0.332101	0.716356	0	0
351	CHST11	CHST11	4	0.291544	1.68716	0.982795	0.296648	0.681414	0	0
352	MMP16	MMP16	4	0.32251	1.89512	0.990118	0.325729	0.739339	0	0
353	SNTG1	SNTG1	4	0.327845	2.00323	0.988883	0.331531	0.638356	0	0
354	NLGN4X	NLGN4X	4	0.332031	1.28121	0.950679	0.349257	0.603919	0	0
355	PCDH15	PCDH15	4	0.325432	2.15898	0.996471	0.326584	0.755266	0	0
356	DSCAM	DSCAM	4	0.296988	2.89051	0.999735	0.297067	0.714081	0	0
357	GRM7	GRM7	4	0.328316	1.73412	0.983766	0.333734	0.585442	0	0
358	NKAIN3	NKAIN3	4	0.288556	0.9352	0.805541	0.358213	0.489223	0	0
359	SOX5	SOX5	4	0.316243	1.87069	0.99603	0.317503	0.601693	0	0
360	TOX	TOX	4	0.319574	0.943752	0.849832	0.376043	0.583123	0	0
361	GRIK2	GRIK2	4	0.323586	1.66933	0.987207	0.327779	0.579904	0	0
362	DGKG	DGKG	4	0.347923	1.61083	0.983854	0.353633	0.739688	0	0
363	LUZP2	LUZP2	4	0.3108	1.76684	0.987383	0.314771	0.656151	0	0
364	AFAP1L2	AFAP1L2	4	0.290221	0.682065	0.757985	0.382885	0.556171	0	0
365	HIF3A	HIF3A	4	0.323634	0.975429	0.866596	0.373454	0.592474	0	0
366	KCNT2	KCNT2	4	0.292664	0.738467	0.760896	0.384631	0.522445	0	0
367	CNTNAP5	CNTNAP5	4	0.344831	1.4433	0.950415	0.362822	0.655668	0	0
368	TMEM132D	TMEM132D	4	0.33798	1.10959	0.903035	0.374271	0.59962	0	0
369	CNTN3	CNTN3	4	0.297309	0.907389	0.835627	0.355792	0.434688	0	0
370	XYLT1	XYLT1	4	0.294767	1.67797	0.981031	0.300467	0.487614	0	0
371	CCDC50	CCDC50	4	0.294491	1.12105	0.927298	0.317579	0.557853	0	0
372	PDZRN4	PDZRN4	4	0.299825	1.10272	0.861214	0.348142	0.510846	0	0
373	MYT1	MYT1	4	0.328618	0.813281	0.838186	0.392059	0.63491	0	0
374	CSMD1	CSMD1	4	0.293676	2.75421	0.999912	0.293702	0.638767	0	0
375	KIAA1217	KIAA1217	4	0.332213	1.07157	0.879037	0.377928	0.586948	0	0
376	MDGA2	MDGA2	4	0.304729	1.92737	0.996294	0.305862	0.5172	0	0
377	BRINP3	BRINP3	4	0.337147	1.42376	0.960385	0.351054	0.722003	0	0
378	SMOC1	SMOC1	4	0.29473	1.55371	0.975737	0.302059	0.581643	0	0
379	NXPH1	NXPH1	4	0.328408	1.57216	0.961796	0.341453	0.709564	0	0
380	SORCS1	SORCS1	4	0.31419	0.92089	0.841186	0.373508	0.532823	0	0
381	NRG3	NRG3	4	0.299737	1.61767	0.969561	0.309147	0.41625	0	0
382	LINC00511	LINC00511	4	0.342388	1.62336	0.98703	0.346887	0.692861	0	0
383	AC092691.1	AC092691.1	4	0.288471	1.52043	0.977413	0.295138	0.368162	0	0
384	DAB1	DAB1	4	0.318173	1.49491	0.969296	0.328252	0.52769	0	0
385	GSG1L	GSG1L	4	0.292167	0.665788	0.748721	0.390222	0.51708	0	0
386	NTNG1	NTNG1	4	0.331762	0.97006	0.852038	0.389374	0.630496	0	0
387	KLF12	KLF12	4	0.297058	0.922141	0.857244	0.346527	0.555515	0	0
388	STK32A	STK32A	4	0.308962	0.818753	0.832363	0.371187	0.606163	0	0
389	PTPRG	PTPRG	4	0.336785	1.52328	0.976531	0.344879	0.615142	0	0
390	GRM5	GRM5	4	0.341289	1.31341	0.938857	0.363515	0.562518	0	0
391	GRIK1	GRIK1	4	0.305908	1.06109	0.849568	0.360075	0.587095	0	0
392	COL11A1	COL11A1	4	0.319505	1.01244	0.888389	0.359645	0.632479	0	0
393	VCAN	VCAN	4	0.308548	1.63284	0.979972	0.314854	0.723762	0	0
394	PARD3	PARD3	4	0.325418	1.47392	0.970002	0.335482	0.51616	0	0
395	SLC24A3	SLC24A3	4	0.305854	0.92341	0.835363	0.366133	0.543123	0	0
396	ATP13A4	ATP13A4	4	0.307119	1.00391	0.87586	0.350648	0.496239	0	0
397	MEGF11	MEGF11	4	0.326227	1.56052	0.982266	0.332117	0.694908	0	0
398	LINC01322	LINC01322	4	0.315064	1.08152	0.864126	0.364604	0.539806	0	0
399	ADAMTS17	ADAMTS17	4	0.287423	0.875123	0.826363	0.347817	0.49237	0	0
400	ARHGAP42	ARHGAP42	4	0.291009	0.783345	0.812864	0.358005	0.475539	0	0
401	KCND2	KCND2	5	0.456606	3.22314	0.939914	0.485796	0.421347	0	0
402	GPM6A	GPM6A	5	0.296085	2.10478	0.863519	0.342882	0.205779	0	0
403	LSAMP	LSAMP	5	0.331276	4.58067	0.997854	0.331989	0.420129	0	0
404	CHL1	CHL1	5	0.329405	1.6733	0.778541	0.423106	0.243405	0	0
405	CA10	CA10	5	0.456883	2.66421	0.900858	0.507164	0.440292	0	0
406	HS6ST3	HS6ST3	5	0.347655	1.83693	0.780687	0.445319	0.247957	0	0
407	MAP2	MAP2	5	0.286261	1.89023	0.801717	0.35706	0.147168	0	0
408	FGF12	FGF12	5	0.384728	2.57707	0.866524	0.44399	0.312764	0	0
409	CNTN1	CNTN1	5	0.354053	2.34816	0.876395	0.403988	0.228876	0	0
410	SLC35F1	SLC35F1	5	0.452968	3.08356	0.934764	0.48458	0.45151	0	0
411	PLCB1	PLCB1	5	0.317488	1.8238	0.804721	0.394531	0.166026	0	0
412	NTRK3	NTRK3	5	0.293267	1.42691	0.733047	0.400065	0.174627	0	0
413	PTPRZ1	PTPRZ1	5	0.446903	3.90722	0.964378	0.463411	0.548352	0	0
414	DPP6	DPP6	5	0.375513	3.56267	0.962232	0.390252	0.375012	0	0
415	GALNT13	GALNT13	5	0.297807	2.37481	0.865665	0.344021	0.134131	0	0
416	NRXN1	NRXN1	5	0.438189	4.70213	0.991416	0.441983	0.580641	0	0
417	KHDRBS3	KHDRBS3	5	0.284059	1.96216	0.83133	0.341693	0.165845	0	0
418	SORCS3	SORCS3	5	0.307446	1.25863	0.680687	0.451671	0.225617	0	0
419	C1orf21	C1orf21	5	0.300666	1.25056	0.677682	0.443668	0.215129	0	0
420	DCC	DCC	5	0.31978	2.35835	0.875536	0.365238	0.15662	0	0
421	DLGAP1	DLGAP1	5	0.370926	2.37191	0.903004	0.410769	0.265734	0	0
422	SEMA5A	SEMA5A	5	0.332964	2.2288	0.862661	0.385973	0.231292	0	0
423	FGF14	FGF14	5	0.449594	3.51157	0.962661	0.467032	0.456662	0	0
424	CTNNA2	CTNNA2	5	0.286604	2.18589	0.838627	0.341754	0.106016	0	0
425	SEZ6L	SEZ6L	5	0.347912	1.61907	0.748498	0.464813	0.280704	0	0
426	KAZN	KAZN	5	0.347509	3.19955	0.945494	0.367542	0.248028	0	0
427	ADGRB3	ADGRB3	5	0.28496	3.47944	0.983691	0.289684	0.149861	0	0
428	TMEM132C	TMEM132C	5	0.327276	1.95631	0.807725	0.405182	0.194221	0	0
429	MTSS1L	MTSS1L	5	0.329338	1.74345	0.790129	0.416816	0.229842	0	0
430	NRCAM	NRCAM	5	0.421337	3.04617	0.929185	0.453449	0.38607	0	0
431	OPHN1	OPHN1	5	0.372687	2.42632	0.89485	0.41648	0.3009	0	0
432	LRRC4C	LRRC4C	5	0.4086	5.08538	0.990129	0.412674	0.590136	0	0
433	LRRTM4	LRRTM4	5	0.428336	4.13428	0.97897	0.437538	0.476455	0	0
434	ATRNL1	ATRNL1	5	0.426431	2.93702	0.927897	0.459567	0.383982	0	0
435	PCDH7	PCDH7	5	0.35849	2.03355	0.820601	0.436863	0.252924	0	0
436	FAM155A	FAM155A	5	0.41989	2.82282	0.914592	0.459101	0.35274	0	0
437	OPCML	OPCML	5	0.484844	4.65187	0.990987	0.489253	0.593316	0	0
438	ZEB1	ZEB1	5	0.390541	2.07804	0.846352	0.46144	0.33674	0	0
439	KCNIP4	KCNIP4	5	0.42827	4.48042	0.984979	0.434801	0.48901	0	0
440	PID1	PID1	5	0.370201	1.72135	0.791845	0.467517	0.312802	0	0
441	TNR	TNR	5	0.4822	4.46167	0.982403	0.490837	0.600493	0	0
442	ADGRL3	ADGRL3	5	0.348505	3.86937	0.987554	0.352898	0.362343	0	0
443	RORA	RORA	5	0.383136	2.83596	0.927039	0.41329	0.310133	0	0
444	DPP10	DPP10	5	0.331694	2.11771	0.862661	0.384501	0.174971	0	0
445	SOX6	SOX6	5	0.449741	2.97999	0.925322	0.486037	0.443502	0	0
446	CHST11	CHST11	5	0.365243	2.55365	0.89485	0.408162	0.376615	0	0
447	MMP16	MMP16	5	0.474746	3.28274	0.943777	0.503027	0.491411	0	0
448	SNTG1	SNTG1	5	0.420954	2.98796	0.928755	0.453246	0.3788	0	0
449	NLGN4X	NLGN4X	5	0.342837	1.7121	0.782403	0.438184	0.254349	0	0
450	PCDH15	PCDH15	5	0.501741	3.87005	0.966094	0.51935	0.576743	0	0
451	DSCAM	DSCAM	5	0.491557	5.52592	0.995708	0.493675	0.675828	0	0
452	GRM7	GRM7	5	0.385918	2.4441	0.884979	0.436076	0.29714	0	0
453	PDGFRA	PDGFRA	5	0.288611	1.06176	0.664378	0.434408	0.253273	0	0
454	NLGN1	NLGN1	5	0.312211	4.63344	0.991845	0.314778	0.328504	0	0
455	NKAIN3	NKAIN3	5	0.287535	1.26126	0.634335	0.453286	0.194409	0	0
456	SOX5	SOX5	5	0.43057	3.0054	0.936481	0.459775	0.407757	0	0
457	TOX	TOX	5	0.294006	1.18683	0.652361	0.450681	0.215742	0	0
458	GRIK2	GRIK2	5	0.410516	2.5352	0.903433	0.454395	0.333199	0	0
459	DGKG	DGKG	5	0.420581	2.36744	0.876824	0.479665	0.379849	0	0
460	LUZP2	LUZP2	5	0.433062	2.96098	0.918455	0.471512	0.43277	0	0
461	POU6F2	POU6F2	5	0.28179	1.00824	0.587124	0.47995	0.207983	0	0
462	CNTNAP5	CNTNAP5	5	0.381206	1.99364	0.813734	0.468466	0.296308	0	0
463	TMEM132D	TMEM132D	5	0.321764	1.40443	0.713734	0.450818	0.229932	0	0
464	XYLT1	XYLT1	5	0.391539	2.69027	0.904292	0.432979	0.312087	0	0
465	ERBB4	ERBB4	5	0.278285	3.6465	0.975536	0.285264	0.147148	0	0
466	CCDC50	CCDC50	5	0.278515	1.37595	0.749356	0.371672	0.21978	0	0
467	FAM19A1	FAM19A1	5	0.288185	1.37259	0.612446	0.470548	0.200218	0	0
468	PDZRN4	PDZRN4	5	0.315567	1.57206	0.685837	0.46012	0.212518	0	0
469	CSMD1	CSMD1	5	0.464272	4.97974	0.996996	0.465671	0.627927	0	0
470	LRP1B	LRP1B	5	0.356049	4.87972	0.996137	0.35743	0.485503	0	0
471	KIAA1217	KIAA1217	5	0.285342	1.30285	0.64721	0.440879	0.192464	0	0
472	GRID2	GRID2	5	0.365258	3.74845	0.97382	0.375078	0.384566	0	0
473	MDGA2	MDGA2	5	0.42103	3.09291	0.953648	0.441494	0.372319	0	0
474	BRINP3	BRINP3	5	0.430296	2.20248	0.866524	0.496577	0.38815	0	0
475	SMOC1	SMOC1	5	0.377082	2.43787	0.881116	0.427959	0.340764	0	0
476	NXPH1	NXPH1	5	0.444099	2.56359	0.881974	0.503528	0.409542	0	0
477	NRG3	NRG3	5	0.332814	2.24194	0.837339	0.397466	0.169559	0	0
478	LINC00511	LINC00511	5	0.433436	2.43575	0.906867	0.477948	0.392319	0	0
479	AC092691.1	AC092691.1	5	0.329991	2.20258	0.841202	0.392285	0.159926	0	0
480	DAB1	DAB1	5	0.372681	2.16023	0.852361	0.437234	0.267649	0	0
481	NTNG1	NTNG1	5	0.291925	1.19802	0.633906	0.460519	0.215615	0	0
482	KLF12	KLF12	5	0.283025	1.24591	0.645494	0.438463	0.207204	0	0
483	STK32A	STK32A	5	0.303845	1.10996	0.642918	0.472603	0.235956	0	0
484	PTPRG	PTPRG	5	0.379779	2.11539	0.851502	0.44601	0.2926	0	0
485	CSMD3	CSMD3	5	0.367106	3.06357	0.940773	0.390218	0.299741	0	0
486	GRM5	GRM5	5	0.337611	1.68761	0.762661	0.442675	0.220787	0	0
487	GRIK1	GRIK1	5	0.313982	1.45916	0.678112	0.463023	0.239456	0	0
488	COL11A1	COL11A1	5	0.331894	1.39149	0.718026	0.462232	0.264173	0	0
489	PDZD2	PDZD2	5	0.359299	3.25839	0.92618	0.387937	0.266051	0	0
490	VCAN	VCAN	5	0.425457	2.71562	0.907725	0.468707	0.440572	0	0
491	PARD3	PARD3	5	0.364507	2.043	0.842489	0.432654	0.240384	0	0
492	SLC24A3	SLC24A3	5	0.296672	1.23851	0.642489	0.461755	0.206636	0	0
493	ATP13A4	ATP13A4	5	0.289354	1.29406	0.676824	0.427518	0.184211	0	0
494	MEGF11	MEGF11	5	0.430283	2.47773	0.900429	0.477864	0.407783	0	0
495	UST	UST	5	0.286216	1.24669	0.680687	0.420481	0.19253	0	0
496	ZFPM2	ZFPM2	5	0.341629	2.32077	0.860086	0.397203	0.207627	0	0
497	GPC6	GPC6	5	0.276543	1.35378	0.609442	0.453764	0.179273	0	0
498	LINC01322	LINC01322	5	0.288564	1.35512	0.66309	0.435181	0.193608	0	0
499	ADAMTS17	ADAMTS17	5	0.2908	1.20901	0.648927	0.448124	0.200669	0	0
500	AC004852.2	AC004852.2	5	0.367001	1.82885	0.708584	0.517936	0.303182	0	0
501	TMSB4X	TMSB4X	6	0.368709	3.18746	0.775874	0.475218	0.239714	0	0
502	PTGDS	PTGDS	6	0.424266	4.28597	0.829335	0.511574	0.318914	0	0
503	CLU	CLU	6	0.355523	3.72072	0.809459	0.439211	0.197088	0	0
504	NDUFA4	NDUFA4	6	0.242177	1.65342	0.522961	0.463088	0.0980808	8.54383e-301	1.01402e-295
505	HSP90AB1	HSP90AB1	6	0.258991	2.6373	0.697053	0.371552	0.0470775	6.42524e-145	7.62579e-140
506	QDPR	QDPR	6	0.241322	3.3753	0.703907	0.342832	0.00903049	3.59809e-29	4.2704e-24
507	SOD1	SOD1	6	0.231044	1.62874	0.540096	0.427784	0.0527483	3.37805e-162	4.00924e-157
508	RPL32	RPL32	6	0.208523	1.68298	0.520219	0.400836	0.047074	6.58889e-145	7.82003e-140
509	DYNLL1	DYNLL1	6	0.273355	2.20992	0.627142	0.435874	0.0804336	9.71543e-247	1.15308e-241
510	COX6A1	COX6A1	6	0.25993	1.48603	0.488691	0.53189	0.1256	0	0
511	ACTB	ACTB	6	0.296032	3.30523	0.790267	0.374598	0.148058	0	0
512	CLDND1	CLDND1	6	0.210674	2.28568	0.610692	0.344976	0.00944649	1.94217e-30	2.30506e-25
513	HSP90AA1	HSP90AA1	6	0.290999	4.39641	0.853324	0.341018	0.089318	6.16759e-274	7.32e-269
514	YWHAH	YWHAH	6	0.232865	1.1328	0.401645	0.579777	0.133601	0	0
515	UBC	UBC	6	0.205014	1.8321	0.554489	0.369734	0.0310277	4.51873e-96	5.36305e-91
516	TPI1	TPI1	6	0.212508	1.03806	0.383825	0.553659	0.111024	0	0
517	EEF1A1	EEF1A1	6	0.25919	2.5219	0.684716	0.378537	0.0677178	7.17331e-208	8.51364e-203
518	SELENOW	SELENOW	6	0.311525	2.61654	0.716244	0.434943	0.118805	0	0
519	CFL1	CFL1	6	0.293632	1.79145	0.575737	0.510011	0.14745	0	0
520	RPL11	RPL11	6	0.203972	1.70494	0.539411	0.378138	0.0350078	3.53864e-108	4.19983e-103
521	RPL3	RPL3	6	0.237758	1.86864	0.574366	0.413948	0.0731134	2.35043e-224	2.78961e-219
522	RPS25	RPS25	6	0.213195	1.5742	0.503084	0.423775	0.05737	2.73476e-176	3.24575e-171
523	UCHL1	UCHL1	6	0.215571	1.31003	0.439342	0.490667	0.0834863	4.42824e-256	5.25566e-251
524	SRP14	SRP14	6	0.208911	1.63234	0.505826	0.413009	0.049244	1.61379e-151	1.91533e-146
525	PEBP1	PEBP1	6	0.294783	2.76479	0.714873	0.412357	0.0967824	8.19306e-297	9.72393e-292
526	RPS27	RPS27	6	0.283846	2.52259	0.681974	0.416213	0.0956048	3.34397e-293	3.96879e-288
527	PSAP	PSAP	6	0.212174	2.08429	0.618232	0.343194	0.0233671	8.84731e-73	1.05004e-67
528	CALM1	CALM1	6	0.248173	2.89689	0.721042	0.344187	0.0306579	6.01986e-95	7.14467e-90
529	RPS14	RPS14	6	0.216344	1.69599	0.525703	0.411533	0.0557585	2.2459e-171	2.66555e-166
530	RPS17	RPS17	6	0.324028	0.923707	0.363948	0.890314	0.272908	0	0
531	ALDOA	ALDOA	6	0.294892	1.89557	0.581905	0.506769	0.148191	0	0
532	EIF1	EIF1	6	0.293824	2.73226	0.712132	0.412599	0.0904362	2.31553e-277	2.74819e-272
533	OAZ1	OAZ1	6	0.233717	1.51193	0.514736	0.454053	0.086023	7.6002e-264	9.0203e-259
534	RPL13A	RPL13A	6	0.292003	2.29383	0.654558	0.446107	0.118826	0	0
535	STMN1	STMN1	6	0.299897	2.30501	0.655929	0.457209	0.109705	0	0
536	CALM2	CALM2	6	0.355485	3.73365	0.826594	0.43006	0.243075	0	0
537	BCYRN1	BCYRN1	6	0.658051	3.39431	0.745031	0.883254	0.591293	0	0
538	TMSB10	TMSB10	6	0.256986	1.59451	0.505826	0.508053	0.131409	0	0
539	FTH1P10	FTH1P10	6	0.257683	1.06371	0.398218	0.647089	0.166949	0	0
540	PTMA	PTMA	6	0.290328	3.61567	0.77793	0.373206	0.0714254	3.38674e-219	4.01955e-214
541	SP100	SP100	6	0.275509	1.35062	0.481151	0.572602	0.318354	0	0
542	RPL31	RPL31	6	0.245654	1.36356	0.456477	0.538152	0.123688	0	0
543	COX5B	COX5B	6	0.214404	1.32224	0.45305	0.473246	0.0714182	3.56112e-219	4.22651e-214
544	RPL13AP25	RPL13AP25	6	0.298732	0.988579	0.377656	0.791017	0.238701	0	0
545	RPL21	RPL21	6	0.220707	1.88127	0.562029	0.392696	0.0439227	2.60595e-135	3.09287e-130
546	NRGN	NRGN	6	0.210972	1.04957	0.363263	0.580771	0.114158	0	0
547	HSPA8	HSPA8	6	0.208565	1.43995	0.495545	0.42088	0.0523129	7.17144e-161	8.51142e-156
548	VAMP2	VAMP2	6	0.348544	2.51152	0.69294	0.502993	0.181766	0	0
549	CRYAB	CRYAB	6	0.385435	5.44152	0.841672	0.45794	0.200417	0	0
550	CCK	CCK	6	0.218561	1.01827	0.346127	0.631447	0.129921	0	0
551	CKB	CKB	6	0.31129	2.50653	0.684716	0.454626	0.13195	0	0
552	RPL28	RPL28	6	0.213736	1.74327	0.54695	0.390778	0.0474417	4.99406e-146	5.9272e-141
553	RPS2	RPS2	6	0.2291	1.81593	0.575737	0.397925	0.0627637	9.56701e-193	1.13546e-187
554	ITM2B	ITM2B	6	0.261031	2.47254	0.685401	0.380845	0.0848248	3.54185e-260	4.20365e-255
555	RPL10	RPL10	6	0.257092	2.23997	0.645648	0.398193	0.0758862	7.85383e-233	9.32132e-228
556	FTL	FTL	6	0.376977	5.01956	0.905415	0.416359	0.367117	0	0
557	C2orf68	C2orf68	6	0.275121	1.62423	0.501028	0.549114	0.142054	0	0
558	COX4I1	COX4I1	6	0.233505	1.42087	0.485264	0.481193	0.0953657	1.80765e-292	2.14541e-287
559	BEX3	BEX3	6	0.225383	1.38454	0.464016	0.485722	0.0943086	3.14702e-289	3.73504e-284
560	CST3	CST3	6	0.220869	2.04027	0.532557	0.414733	0.0964542	8.31261e-296	9.86583e-291
561	RPL41	RPL41	6	0.276601	2.50955	0.670322	0.412639	0.101488	3.02649444479863e-311	3.59199e-306
562	ATP1B1	ATP1B1	6	0.277438	3.34308	0.706648	0.39261	0.0460201	1.06838e-141	1.26801e-136
563	RPLP2	RPLP2	6	0.221386	1.6006	0.520905	0.425004	0.0606341	3.01583e-186	3.57933e-181
564	RPL34	RPL34	6	0.203597	1.58818	0.498286	0.408593	0.0526155	8.57933e-162	1.01824e-156
565	RPLP1	RPLP1	6	0.224116	2.15423	0.620288	0.361309	0.03921	5.78439e-121	6.8652e-116
566	PCDH9	PCDH9	6	0.218246	5.69761	0.94928	0.229907	0.0467522	6.29182e-144	7.46745e-139
567	NDRG2	NDRG2	6	0.214552	1.94045	0.562029	0.381745	0.0245861	1.74245e-76	2.06803e-71
568	SERF2	SERF2	6	0.219789	1.46831	0.481837	0.456149	0.0690635	5.56642e-212	6.60651e-207
569	YPEL3	YPEL3	6	0.205328	1.28173	0.45305	0.453213	0.0595864	4.74291e-183	5.62912e-178
570	HNRNPL	HNRNPL	6	0.478953	3.42655	0.827279	0.57895	0.423431	0	0
571	GPM6B	GPM6B	6	0.287881	5.24225	0.914325	0.314856	0.182027	0	0
572	RPL7	RPL7	6	0.230159	1.44086	0.488005	0.471632	0.0841034	5.72174e-258	6.79085e-253
573	TUBA1A	TUBA1A	6	0.235449	2.26387	0.627142	0.375432	0.0398707	5.64194e-123	6.69614e-118
574	RPL15	RPL15	6	0.229236	1.75991	0.561343	0.40837	0.0637761	7.77453e-196	9.2272e-191
575	RPL13	RPL13	6	0.254109	2.56895	0.690199	0.368168	0.0716875	5.35691e-220	6.35785e-215
576	RPS15	RPS15	6	0.320042	2.58488	0.702536	0.455552	0.142605	0	0
577	RPS19	RPS19	6	0.211078	1.76273	0.553119	0.381615	0.0509913	7.64799e-157	9.07702e-152
578	SNAP25	SNAP25	6	0.213977	1.25854	0.418095	0.511792	0.101247	1.65451906597521e-310	1.96367e-305
579	APLP1	APLP1	6	0.365088	3.75509	0.776559	0.470135	0.170678	0	0
580	MALAT1	MALAT1	6	0.345491	15.9941	1	0.345491	0.746674	0	0
581	RPS28	RPS28	6	0.254986	2.14662	0.617546	0.412902	0.0792985	2.88382e-243	3.42266e-238
582	RPL23A	RPL23A	6	0.218858	1.19084	0.415353	0.526921	0.110254	0	0
583	RGCC	RGCC	6	0.218835	2.09265	0.580535	0.376954	0.0319644	6.3987e-99	7.5943e-94
584	GLUL	GLUL	6	0.22025	1.92924	0.568197	0.38763	0.0362449	6.09823e-112	7.23768e-107
585	MARCKSL1	MARCKSL1	6	0.349369	2.86095	0.736806	0.474167	0.225114	0	0
586	TTLL7	TTLL7	6	0.258331	4.31732	0.801919	0.322141	0.0162964	2.77252e-51	3.29056e-46
587	PRRG3	PRRG3	6	0.223067	0.664871	0.272104	0.819785	0.180072	0	0
588	MT2A	MT2A	6	0.232232	2.0248	0.549692	0.422477	0.0676761	9.61488e-208	1.14114e-202
589	MBP	MBP	6	0.216422	3.54652	0.724469	0.298732	0.000658459	0.00247513	1
590	CLDN11	CLDN11	6	0.303781	3.51501	0.670322	0.453187	0.0896704	5.135e-275	6.09448e-270
591	TSC22D4	TSC22D4	6	0.235109	1.93806	0.589445	0.398865	0.0650888	7.64539e-200	9.07394e-195
592	CBR1	CBR1	6	0.205601	1.49465	0.473612	0.434112	0.0420633	1.19428e-129	1.41743e-124
593	HNRNPH1	HNRNPH1	6	0.227013	2.30952	0.553119	0.410424	0.0612557	3.82758e-188	4.54276e-183
594	APOD	APOD	6	0.405939	4.6248	0.86292	0.470425	0.380801	0	0
595	COL6A3	COL6A3	6	0.377581	1.44456	0.483208	0.781406	0.302959	0	0
596	SNHG25	SNHG25	6	0.23809	1.35347	0.455792	0.522366	0.103956	8.01616569720964e-319	9.51398625773326e-314
597	CNP	CNP	6	0.293536	4.15408	0.798492	0.367613	0.0875364	1.76499e-268	2.09478e-263
598	PLP1	PLP1	6	0.293543	6.46768	0.817683	0.358993	0.0583153	3.57802e-179	4.24657e-174
599	PON2	PON2	6	0.313484	3.1532	0.736806	0.425463	0.144937	0	0
600	SPP1	SPP1	6	0.278379	3.88143	0.702536	0.396249	0.0550178	4.0716e-169	4.83238e-164
601	MEF2C	MEF2C	7	0.397594	1.05625	0.940855	0.422588	0.318246	0	0
602	MGAT4A	MGAT4A	7	0.361766	0.914859	0.912648	0.396392	0.174656	0	0
603	SKAP2	SKAP2	7	0.558258	0.753724	0.856233	0.651993	0.373511	0	0
604	FGD4	FGD4	7	0.442288	1.04836	0.937216	0.471917	0.253067	0	0
605	SORL1	SORL1	7	0.389623	1.16304	0.939945	0.414516	0.244641	0	0
606	SMAP2	SMAP2	7	0.39674	0.934041	0.915378	0.433416	0.272356	0	0
607	SLCO2B1	SLCO2B1	7	0.692643	0.816354	0.876251	0.790461	0.616153	0	0
608	HCK	HCK	7	0.396637	0.309921	0.511374	0.775629	0.274815	0	0
609	CTSS	CTSS	7	0.383519	0.280682	0.502275	0.763565	0.249852	0	0
610	ARHGAP24	ARHGAP24	7	0.536623	1.51046	0.973612	0.551167	0.344901	0	0
611	RREB1	RREB1	7	0.477307	0.502857	0.694268	0.687498	0.317074	0	0
612	RNASET2	RNASET2	7	0.504231	0.577707	0.795268	0.634039	0.378995	0	0
613	SRGAP2B	SRGAP2B	7	0.366804	1.58759	0.988171	0.371195	0.307229	0	0
614	CTSB	CTSB	7	0.402236	0.855755	0.88353	0.45526	0.25953	0	0
615	ARHGAP26	ARHGAP26	7	0.484521	1.18744	0.966333	0.501402	0.292228	0	0
616	ST6GAL1	ST6GAL1	7	0.404068	1.13264	0.934486	0.432396	0.384728	0	0
617	ABR	ABR	7	0.423369	0.862659	0.902639	0.469035	0.28004	0	0
618	NCK2	NCK2	7	0.396163	0.549742	0.716106	0.553218	0.258182	0	0
619	CYFIP1	CYFIP1	7	0.452595	0.859637	0.856233	0.528589	0.301254	0	0
620	DLEU7	DLEU7	7	0.4277	0.677349	0.77434	0.552341	0.260701	0	0
621	CD74	CD74	7	0.461026	0.686321	0.790719	0.583047	0.33156	0	0
622	IPCEF1	IPCEF1	7	0.359115	0.469455	0.603276	0.595275	0.225394	0	0
623	CD86	CD86	7	0.559377	0.460623	0.66606	0.839829	0.478504	0	0
624	CX3CR1	CX3CR1	7	0.380866	0.312747	0.479527	0.794255	0.283802	0	0
625	NCKAP1L	NCKAP1L	7	0.491331	0.346749	0.598726	0.820627	0.383198	0	0
626	TRPM2	TRPM2	7	0.479285	0.421581	0.653321	0.733612	0.328331	0	0
627	RUBCNL	RUBCNL	7	0.386746	0.358106	0.580528	0.666198	0.275764	0	0
628	CSF1R	CSF1R	7	0.675366	0.689582	0.857143	0.787927	0.535246	0	0
629	CSF2RA	CSF2RA	7	0.522294	0.538423	0.716106	0.729353	0.393048	0	0
630	BLNK	BLNK	7	0.45738	0.363755	0.585077	0.781743	0.334263	0	0
631	TNFRSF1B	TNFRSF1B	7	0.438662	0.368454	0.538672	0.814341	0.321437	0	0
632	LRRK1	LRRK1	7	0.424316	0.582246	0.723385	0.58657	0.319835	0	0
633	APBB1IP	APBB1IP	7	0.768707	1.09344	0.928116	0.828244	0.68437	0	0
634	SLC2A5	SLC2A5	7	0.484912	0.439261	0.633303	0.765687	0.351781	0	0
635	C3	C3	7	0.534717	0.654716	0.77707	0.688119	0.362101	0	0
636	TMEM156	TMEM156	7	0.457071	0.401779	0.595996	0.766902	0.324803	0	0
637	FMN1	FMN1	7	0.449256	0.834499	0.831665	0.540189	0.228013	0	0
638	LYN	LYN	7	0.539612	0.622246	0.801638	0.673137	0.420652	0	0
639	AKAP13	AKAP13	7	0.396971	0.870498	0.919017	0.431951	0.302084	0	0
640	ITGB2	ITGB2	7	0.371436	0.258508	0.484986	0.765869	0.259108	0	0
641	LPCAT2	LPCAT2	7	0.435362	0.647097	0.796178	0.546815	0.244792	0	0
642	FAM149A	FAM149A	7	0.487938	0.589988	0.741583	0.657968	0.367156	0	0
643	DENND3	DENND3	7	0.610695	0.698523	0.812557	0.751572	0.489595	0	0
644	CSF3R	CSF3R	7	0.388928	0.2633	0.484986	0.801935	0.305061	0	0
645	SRGN	SRGN	7	0.363475	0.447903	0.521383	0.697137	0.245491	0	0
646	SFMBT2	SFMBT2	7	0.407938	1.31339	0.979072	0.416658	0.185987	0	0
647	LAPTM5	LAPTM5	7	0.381358	0.327384	0.55232	0.690466	0.247168	0	0
648	MYO1F	MYO1F	7	0.397997	0.423517	0.66515	0.598357	0.212719	0	0
649	MS4A6A	MS4A6A	7	0.428987	0.359379	0.535942	0.800437	0.345087	0	0
650	FOXP2	FOXP2	7	0.515151	0.754207	0.753412	0.683757	0.305146	0	0
651	INPP5D	INPP5D	7	0.708445	0.862326	0.917197	0.772402	0.58772	0	0
652	ITGAX	ITGAX	7	0.428756	0.351202	0.55414	0.773732	0.3418	0	0
653	IRF8	IRF8	7	0.366671	0.260568	0.44222	0.82916	0.288068	0	0
654	AL031733.2	AL031733.2	7	0.375198	0.231306	0.44677	0.839802	0.33755	0	0
655	BMP2K	BMP2K	7	0.397589	0.846719	0.88535	0.449076	0.204003	0	0
656	USP53	USP53	7	0.364795	0.564736	0.694268	0.525439	0.196313	0	0
657	IL13RA1	IL13RA1	7	0.515623	0.499943	0.707916	0.728368	0.354788	0	0
658	FGD2	FGD2	7	0.499815	0.363514	0.610555	0.818624	0.427805	0	0
659	FYB1	FYB1	7	0.712344	0.862285	0.897179	0.793982	0.58274	0	0
660	TLR2	TLR2	7	0.585485	0.527493	0.708826	0.825992	0.49413	0	0
661	PALD1	PALD1	7	0.544083	0.671633	0.789809	0.688879	0.462341	0	0
662	ADAM28	ADAM28	7	0.588303	0.444106	0.693358	0.848484	0.500641	0	0
663	MIS18BP1	MIS18BP1	7	0.372526	0.450678	0.66788	0.557775	0.213826	0	0
664	MSR1	MSR1	7	0.386549	0.380517	0.543221	0.711587	0.257296	0	0
665	AOAH	AOAH	7	0.392859	0.663557	0.799818	0.491186	0.20585	0	0
666	ALPK1	ALPK1	7	0.394402	0.321982	0.525933	0.74991	0.271282	0	0
667	TBXAS1	TBXAS1	7	0.655966	1.03924	0.946315	0.693179	0.512207	0	0
668	CLEC7A	CLEC7A	7	0.50895	0.416974	0.613285	0.829876	0.406998	0	0
669	PTPRC	PTPRC	7	0.657078	0.828179	0.897179	0.732382	0.466396	0	0
670	HS3ST4	HS3ST4	7	0.563294	1.16591	0.830755	0.67805	0.412075	0	0
671	RHBDF2	RHBDF2	7	0.645413	0.616245	0.828935	0.778604	0.515878	0	0
672	SCIN	SCIN	7	0.441375	0.36698	0.5596	0.788734	0.313009	0	0
673	SH3RF3	SH3RF3	7	0.376	0.699099	0.757962	0.496067	0.27664	0	0
674	VAV1	VAV1	7	0.428678	0.351228	0.593267	0.722572	0.278663	0	0
675	ST8SIA4	ST8SIA4	7	0.456586	0.408795	0.616015	0.741194	0.336523	0	0
676	HCLS1	HCLS1	7	0.598175	0.50974	0.749773	0.797809	0.491104	0	0
677	SH3TC1	SH3TC1	7	0.483109	0.340463	0.575068	0.840089	0.401356	0	0
678	RCSD1	RCSD1	7	0.491999	0.376416	0.613285	0.802236	0.3839	0	0
679	DOCK8	DOCK8	7	0.78842	1.2227	0.970883	0.812066	0.710373	0	0
680	RGS10	RGS10	7	0.485931	0.372138	0.606915	0.800657	0.346666	0	0
681	RUNX1	RUNX1	7	0.538276	0.959858	0.895359	0.601185	0.351939	0	0
682	CD53	CD53	7	0.501685	0.372169	0.630573	0.795601	0.358985	0	0
683	LRCH1	LRCH1	7	0.392377	0.673913	0.838035	0.46821	0.318962	0	0
684	MERTK	MERTK	7	0.38432	0.618898	0.694268	0.553561	0.261508	0	0
685	RIN3	RIN3	7	0.500857	0.659212	0.826206	0.606213	0.408631	0	0
686	ATP8B4	ATP8B4	7	0.687282	0.824946	0.873521	0.786794	0.561353	0	0
687	SLC11A1	SLC11A1	7	0.398863	0.390513	0.55778	0.71509	0.290827	0	0
688	SAMSN1	SAMSN1	7	0.555754	0.581023	0.708826	0.784048	0.416906	0	0
689	ARHGAP25	ARHGAP25	7	0.515674	0.43685	0.643312	0.801593	0.392262	0	0
690	IRAK3	IRAK3	7	0.364585	0.593532	0.7798	0.467537	0.224454	0	0
691	LINC02232	LINC02232	7	0.478086	0.470667	0.590537	0.809578	0.380935	0	0
692	RUNX2	RUNX2	7	0.464774	0.673523	0.804368	0.577813	0.244738	0	0
693	IKZF1	IKZF1	7	0.614979	0.50683	0.715196	0.859875	0.516774	0	0
694	TGFBR2	TGFBR2	7	0.528533	0.641075	0.78162	0.676203	0.349899	0	0
695	SYK	SYK	7	0.698029	0.655725	0.828935	0.842079	0.597186	0	0
696	ABCC4	ABCC4	7	0.511116	0.81613	0.827116	0.61795	0.415005	0	0
697	ALOX5	ALOX5	7	0.418369	0.390155	0.633303	0.660614	0.283781	0	0
698	RBM47	RBM47	7	0.573791	0.681356	0.824386	0.696023	0.41129	0	0
699	NFATC2	NFATC2	7	0.479534	0.472658	0.693358	0.691612	0.31673	0	0
700	ARHGAP15	ARHGAP15	7	0.537753	0.686129	0.830755	0.647306	0.446215	0	0

## Sheet: OPC_regression
	Gene	Coefficient	p.val
SYT1	SYT1	0.0327888	0.0711454
IGSF11	IGSF11	0.0293207	0.00415129
ROBO2	ROBO2	0.0285099	0.0378232
NSF	NSF	0.0274523	0.0026237
NSFP1	NSFP1	0.0272854	0.0105765
SORT1	SORT1	0.0264989	0.00121492
USP48	USP48	0.0258902	0.000208014
AGBL4	AGBL4	0.025511	0.0791396
CALM1	CALM1	0.0254617	0.0802738
IDS	IDS	0.0254225	0.0483939
CAMK2N1	CAMK2N1	0.0253885	0.0537476
PRKG1	PRKG1	0.0250269	0.00502239
ATP9A	ATP9A	0.025003	0.00623292
EPHA6	EPHA6	0.0250024	0.000407974
IQCJ-SCHIP1	IQCJ-SCHIP1	0.0247676	0.0670306
NEAT1	NEAT1	0.0247657	0.0211736
LUC7L3	LUC7L3	0.0247405	0.00785322
MATR3	MATR3	0.0247167	0.00584203
ZNF483	ZNF483	0.024682	0.00606992
PRRC2B	PRRC2B	0.0241102	0.00967166
GPC5	GPC5	0.0239139	0.125921
ZNF91	ZNF91	0.023804	0.00113761
TENM2	TENM2	0.0236995	0.00570669
CHIC1	CHIC1	0.0236422	0.000673958
RN7SL2	RN7SL2	0.0236277	0.0428802
PUM3	PUM3	0.0236161	0.00857813
ZNF708	ZNF708	0.0230709	0.0125486
KCNQ5	KCNQ5	0.0226934	0.00585489
CNOT1	CNOT1	0.0223216	0.00959066
LARP4B	LARP4B	0.0223108	0.000681854
RYR2	RYR2	0.022012	0.0180255
TMEM131	TMEM131	0.021858	0.00108961
NKAIN2	NKAIN2	0.0218146	0.112896
MAPK1	MAPK1	0.0217027	0.00180711
CDK17	CDK17	0.0215408	0.000316126
ZNF248	ZNF248	0.0214062	0.0125951
DOCK7	DOCK7	0.0213683	0.00760556
SMG6	SMG6	0.0213033	0.00957428
LARS	LARS	0.0210361	0.000471391
NUP98	NUP98	0.0209789	0.00424765
AHI1	AHI1	0.0209023	0.0592685
PRRC2C	PRRC2C	0.0208759	0.0013442
HERC1	HERC1	0.0208483	0.00618823
MAN2A1	MAN2A1	0.0208233	0.0394306
ARGLU1	ARGLU1	0.0207011	0.0473308
GOLGB1	GOLGB1	0.0206631	0.00432185
GIGYF2	GIGYF2	0.0206317	0.000786858
CENPC	CENPC	0.020593	0.000315984
LTN1	LTN1	0.0205625	0.00128409
ORC4	ORC4	0.020554	0.00732142
YWHAZ	YWHAZ	0.0205536	0.0112921
PLXDC2	PLXDC2	0.0205131	0.0381054
PJA2	PJA2	0.0203279	0.0014053
GLIS3	GLIS3	0.0203264	0.0595141
LPGAT1	LPGAT1	0.0202995	0.00493911
ZDHHC11B	ZDHHC11B	0.0202877	0.00102933
KLHL3	KLHL3	0.0202818	0.000443273
EP400	EP400	0.0202815	0.00264222
SETX	SETX	0.0202157	0.00584655
RBM25	RBM25	0.0202064	0.00621469
PEX5L	PEX5L	0.0201634	0.165122
GOLGA4	GOLGA4	0.0201558	0.0102005
TXNDC16	TXNDC16	0.0200807	0.0228765
KMT2A	KMT2A	0.0199497	0.00770648
RPS24	RPS24	0.0198756	0.115599
MIGA1	MIGA1	0.0198593	0.001108
PRKAG2	PRKAG2	0.0198072	0.0128461
DLGAP2	DLGAP2	0.0196351	0.0813301
SUDS3	SUDS3	0.0195708	0.0186399
MGEA5	MGEA5	0.0195641	0.00922557
EPS15	EPS15	0.0195564	0.000692666
HSPA12A	HSPA12A	0.0195431	0.00143961
USP9X	USP9X	0.0194484	0.00173616
PHF3	PHF3	0.0194194	0.000966457
TBCD	TBCD	0.0193895	0.00352945
MGAT4A	MGAT4A	0.0193859	0.000467429
MAP3K7	MAP3K7	0.0193851	0.00268493
UBR2	UBR2	0.0193587	0.00231697
PRPF4B	PRPF4B	0.0193224	0.00711463
MAP7	MAP7	0.0193138	0.0459082
TPP2	TPP2	0.0192835	3.35e-05
UVRAG	UVRAG	0.0192651	0.00780825
ADAMTS9-AS2	ADAMTS9-AS2	0.019242	0.0715139
IARS	IARS	0.0191854	0.0387979
ALG13	ALG13	0.019178	0.000908434
CDK19	CDK19	0.0191271	0.0212695
PREX1	PREX1	0.0191199	0.0229998
ADGRV1	ADGRV1	0.0190949	0.0028625
VPS13C	VPS13C	0.0190731	0.00133017
ATL2	ATL2	0.0190592	0.00395191
CDK12	CDK12	0.0190441	0.00342
TRPM7	TRPM7	0.0189554	0.00015475
USP12	USP12	0.0189511	0.00150074
MTUS1	MTUS1	0.0189422	0.00181672
INPP4B	INPP4B	0.0189355	0.0424273
ATP13A3	ATP13A3	0.0189352	0.00887503
RSBN1L	RSBN1L	0.0189072	0.00203918
ARIH1	ARIH1	0.0188677	0.00526214
KIAA1468	KIAA1468	0.018799	0.000759255
CEP70	CEP70	0.0187954	0.00407293
RBM33	RBM33	0.0187236	0.00228621
AHCTF1	AHCTF1	0.0187182	0.0135406
FNBP1	FNBP1	0.0186983	0.00969045
GLS	GLS	0.0185352	0.00271166
ARHGAP26	ARHGAP26	0.0185294	0.0281028
OTUD7A	OTUD7A	0.0184969	0.0324103
CREBRF	CREBRF	0.0184609	0.00552488
ZC3H13	ZC3H13	0.0183745	0.00726731
DNAJC6	DNAJC6	0.0183434	0.00900442
CHRM3	CHRM3	0.0182994	0.00136507
CCDC66	CCDC66	0.0182752	0.00204638
ZKSCAN8	ZKSCAN8	0.0182689	0.00339699
CHKA	CHKA	0.0182612	0.0200697
FBXW11	FBXW11	0.0182302	0.0116853
SLC4A4	SLC4A4	0.0181794	0.029176
SPIN1	SPIN1	0.0181705	0.00237401
MGAT4C	MGAT4C	0.0181539	0.000883533
DANT2	DANT2	0.0180716	0.132077
GRIA1	GRIA1	0.0180652	0.0302196
RPS12	RPS12	0.0179882	0.0744965
CUL5	CUL5	0.017975	0.00397393
FANCL	FANCL	0.0179676	0.00599673
RCOR3	RCOR3	0.0179436	0.00678802
CACNA1E	CACNA1E	0.0179335	0.142093
PCCA	PCCA	0.0179333	0.00351537
ZNF718	ZNF718	0.0179229	0.005372
MYSM1	MYSM1	0.0178814	0.00195166
SLC20A2	SLC20A2	0.0178544	0.0249201
KDM6A	KDM6A	0.0177976	0.000347295
SMARCA1	SMARCA1	0.0177765	0.0011958
AC004980.1	AC004980.1	0.0177443	0.00937082
CDC42BPB	CDC42BPB	0.0177399	0.00838936
CLIP4	CLIP4	0.0176755	0.00797722
CPQ	CPQ	0.0176579	0.0247341
LYST	LYST	0.017652	0.0318544
RIF1	RIF1	0.0176035	0.00264238
TPT1	TPT1	0.0176006	0.218983
OSBPL8	OSBPL8	0.0176	0.015227
ACBD6	ACBD6	0.0175996	0.000568698
PTPRA	PTPRA	0.0175714	0.00375428
CAMK2A	CAMK2A	0.0174022	0.0514426
LRRFIP2	LRRFIP2	0.0173811	0.00942598
BCLAF1	BCLAF1	0.0173778	0.00114396
NPTN	NPTN	0.0173532	0.00754163
LIMCH1	LIMCH1	0.0173396	0.0380547
ALMS1	ALMS1	0.0173351	0.0501344
PAFAH1B1	PAFAH1B1	0.0172973	0.00884888
SLC7A11	SLC7A11	0.0172836	0.0103012
SESTD1	SESTD1	0.0172799	0.00151068
NKTR	NKTR	0.0172566	0.0203241
ABLIM1	ABLIM1	0.0171927	0.0740264
SORBS1	SORBS1	0.0171734	0.144029
2022-09-11	2022-09-11	0.0171677	0.0105939
KIF16B	KIF16B	0.0171523	0.0486487
SPATA7	SPATA7	0.0171238	0.017272
HSD17B4	HSD17B4	0.0170662	0.0018312
SRP54	SRP54	0.0170626	0.00188962
ZRANB2	ZRANB2	0.0170485	0.0274499
CLIP1	CLIP1	0.0170256	0.00750176
RPL37A	RPL37A	0.0170228	0.136321
HIPK3	HIPK3	0.0170207	0.00198846
IL6ST	IL6ST	0.0170131	0.0060894
RPS6KC1	RPS6KC1	0.0169948	0.00401277
SLC38A6	SLC38A6	0.0169857	0.005998
ANKRD11	ANKRD11	0.0169804	0.0422986
RBM28	RBM28	0.0169466	0.0153986
PAK2	PAK2	0.0169169	0.00539248
ATP6V0A1	ATP6V0A1	0.0168744	0.00628017
NSL1	NSL1	0.0168529	0.000190937
CHM	CHM	0.0168034	0.00558087
BOD1L1	BOD1L1	0.016803	0.0775676
HSPH1	HSPH1	0.0167745	0.442918
ATR	ATR	0.0167392	0.0248664
PPP2R2C	PPP2R2C	0.0166924	0.0652244
BIRC6	BIRC6	0.016677	0.00324631
MAP3K2	MAP3K2	0.0166748	0.00367783
ELP2	ELP2	0.0166699	0.00560944
PSMD11	PSMD11	0.0166465	0.0190898
ULK4	ULK4	0.0166299	0.0489412
KIAA1109	KIAA1109	0.016629	5.39e-05
PPP1R12B	PPP1R12B	0.01661	0.0087508
PREPL	PREPL	0.016605	0.0340801
ZNF644	ZNF644	0.0166045	0.0117288
ABCA1	ABCA1	0.0165944	0.00660621
FRS2	FRS2	0.0165709	0.00277609
USP14	USP14	0.0165541	0.00513261
DDX24	DDX24	0.0165186	0.109499
KCNH7	KCNH7	0.0164982	0.00641933
MAPRE2	MAPRE2	0.0164756	0.00540661
NDUFA10	NDUFA10	0.0164712	0.00337017
CCDC6	CCDC6	0.0163987	0.00450781
RPS18	RPS18	0.016395	0.223678
RPL24	RPL24	0.0163903	0.109009
AHCYL2	AHCYL2	0.0163876	0.0109013
RNF19A	RNF19A	0.016367	0.00235729
PUM2	PUM2	0.0163632	0.00274743
CCNT2	CCNT2	0.0163428	9.82e-05
NEO1	NEO1	0.0163242	0.00950016
ADAM9	ADAM9	0.0163092	0.000841586
UBE2K	UBE2K	0.0162822	0.00128177
TSPYL2	TSPYL2	0.0162685	0.0405136
TCF25	TCF25	0.0162259	0.0401867
NUDCD3	NUDCD3	0.0162036	0.0116721
FOXO1	FOXO1	0.0161533	0.00540902
WDR60	WDR60	0.0161482	0.0276144
FMN2	FMN2	0.0161354	0.0391307
PPIG	PPIG	0.0161293	0.000521392
ARL8B	ARL8B	0.0161135	0.00235174
WAPL	WAPL	0.0161035	0.00563572
FOXJ3	FOXJ3	0.0160837	0.00868347
PIP5K1A	PIP5K1A	0.0160568	0.0515079
RGL1	RGL1	0.0160546	0.0225913
DPYD	DPYD	0.0159604	0.108847
DCLK1	DCLK1	0.0159581	0.0406743
TBC1D15	TBC1D15	0.0159543	0.00218702
ZNF528	ZNF528	0.0159492	0.00734526
FUT8	FUT8	0.01592	0.0335603
ARHGAP32	ARHGAP32	0.0159157	0.00351256
PIKFYVE	PIKFYVE	0.015905	0.00332561
BDP1	BDP1	0.0159047	0.00599018
TMEM161B	TMEM161B	0.0159036	0.00169644
ERBIN	ERBIN	0.0158994	0.0191892
CIT	CIT	0.0158967	0.0703371
MAP1B	MAP1B	0.0158953	0.175828
C5orf42	C5orf42	0.0158924	0.00912683
CCDC82	CCDC82	0.0158631	0.00264775
FANCI	FANCI	0.0158581	0.0221565
PAPD4	PAPD4	0.0158427	0.000410127
RBBP6	RBBP6	0.0158035	0.00357343
ZFC3H1	ZFC3H1	0.0157914	0.00389522
C2CD5	C2CD5	0.0157718	0.00117851
GRIN2A	GRIN2A	0.0157574	0.0252946
INO80	INO80	0.0157484	0.00169341
HPRT1	HPRT1	0.0157306	0.0405602
TATDN1	TATDN1	0.0157183	0.0324026
DHX36	DHX36	0.0157125	0.0140769
MAT2A	MAT2A	0.0157059	0.00101438
L3MBTL4	L3MBTL4	0.0156922	0.134437
SPAG9	SPAG9	0.0156795	0.0124282
SSBP1	SSBP1	0.0156731	0.00277401
MTR	MTR	0.0156696	0.0192271
RNGTT	RNGTT	0.0156661	0.0126688
HLTF	HLTF	0.0156623	0.0064321
PRUNE2	PRUNE2	0.0156579	0.00465418
OSBPL9	OSBPL9	0.0156196	0.00262903
RARS2	RARS2	0.0155968	0.00298737
RPL37	RPL37	0.0155845	0.147565
ATF6	ATF6	0.0155794	0.000581555
KALRN	KALRN	0.01557	0.12204
SLC35F5	SLC35F5	0.0155513	0.00169685
PHC3	PHC3	0.0155512	4.72e-05
PPIL4	PPIL4	0.0155356	0.000492546
ZNF346	ZNF346	0.0155185	0.0279665
KIFAP3	KIFAP3	0.0154878	0.00172233
DIP2B	DIP2B	0.01548	0.0262355
KDM5A	KDM5A	0.0154503	0.0175976
GON4L	GON4L	0.0154462	0.014745
MYO6	MYO6	0.0154397	0.00500688
TENM4	TENM4	0.0154319	0.0356484
PIK3C2A	PIK3C2A	0.015431	0.00159973
TRIP12	TRIP12	0.0154303	0.0059374
OIP5-AS1	OIP5-AS1	0.0154262	0.0238955
CLTC	CLTC	0.0153989	0.0202066
AGTPBP1	AGTPBP1	0.0153922	0.00718364
TRAPPC8	TRAPPC8	0.015392	0.00298433
COPS2	COPS2	0.0153846	0.00156512
FARSB	FARSB	0.0153759	0.0190961
GAREM1	GAREM1	0.0153387	0.00765025
YTHDC2	YTHDC2	0.0153336	0.00453561
PCMTD1	PCMTD1	0.0152937	0.00408103
NBAS	NBAS	0.0152921	0.0110466
MICAL3	MICAL3	0.0152847	0.0530455
CNKSR2	CNKSR2	0.015267	0.00871904
TRAPPC10	TRAPPC10	0.0152512	0.00669715
ATXN2	ATXN2	0.0152259	0.00772854
LRPPRC	LRPPRC	0.0152111	0.00253784
ATM	ATM	0.0152016	0.000331254
PCGF5	PCGF5	0.0151916	0.0586629
CEP192	CEP192	0.0151614	0.00242042
ESCO1	ESCO1	0.0151498	0.000362055
SNX9	SNX9	0.0151486	0.0018963
MTUS2	MTUS2	0.015119	0.0294589
SRSF5	SRSF5	0.015119	0.156613
BAZ1B	BAZ1B	0.0151109	0.0107296
ADGRA3	ADGRA3	0.0150853	0.0132385
CELF1	CELF1	0.0150654	0.0409507
RTTN	RTTN	0.0150645	0.0071282
ORC3	ORC3	0.0150533	0.00287383
KIF3A	KIF3A	0.0150248	0.0348801
CLVS1	CLVS1	0.0150074	0.0777746
INTU	INTU	0.0149993	0.0340013
CCNL2	CCNL2	0.0149908	0.0462772
CEP350	CEP350	0.0149772	0.00258678
BRWD1	BRWD1	0.0149631	0.00037384
BMP2K	BMP2K	0.0149503	0.0105165
LRIG1	LRIG1	0.0149433	0.0211635
DNHD1	DNHD1	0.0149348	0.0717337
OSBP2	OSBP2	0.0149267	0.0629533
RPLP1	RPLP1	0.0149257	0.34138
KIAA0232	KIAA0232	0.0149194	0.0289228
TARSL2	TARSL2	0.0149142	0.0037106
FRMPD4	FRMPD4	0.0149098	0.0236806
SUGP2	SUGP2	0.0148954	0.0171511
TRIM37	TRIM37	0.0148952	0.0365056
GABRB2	GABRB2	0.0148889	0.0749769
ANKRD13C	ANKRD13C	0.0148827	0.0111344
RPL11	RPL11	0.0148763	0.165735
UBE3A	UBE3A	0.0148749	0.0113637
ITCH	ITCH	0.0148748	0.0111398
ARHGAP17	ARHGAP17	0.0148678	0.00342874
DMXL1	DMXL1	0.0148677	5.85e-05
CDKL5	CDKL5	0.0148568	0.0272684
RPL32	RPL32	0.0148486	0.326435
CAMK4	CAMK4	0.0148452	0.0499307
RPE	RPE	0.0148451	0.0297547
PCLO	PCLO	0.0148334	0.11489
MYCBP2	MYCBP2	0.0148185	0.00564326
EPC2	EPC2	0.0148168	0.0539772
DYNC1I2	DYNC1I2	0.014815	0.00427449
ZNF138	ZNF138	0.0147738	0.00141008
PRKCB	PRKCB	0.0147642	0.0831576
RYR3	RYR3	0.0147567	0.0119333
CUL3	CUL3	0.0147433	0.00180396
NCOR1	NCOR1	0.0147351	0.00166432
XPO1	XPO1	0.0147098	0.204531
ZNF141	ZNF141	0.0147093	0.0170731
LRCH2	LRCH2	0.0146916	0.000321896
BRD4	BRD4	0.0146859	0.0190367
SCAMP1	SCAMP1	0.0146847	0.00562189
ZBTB41	ZBTB41	0.0146764	0.00216805
FXR1	FXR1	0.0146721	0.164498
PKN2	PKN2	0.0146716	0.00313487
CPNE8	CPNE8	0.0146635	0.0359257
PIAS2	PIAS2	0.0146118	0.0289697
FAM184A	FAM184A	0.014607	0.0461768
OGT	OGT	0.0145902	0.0617808
LARP4	LARP4	0.0145878	0.0187279
VPS13A	VPS13A	0.0145764	0.0137166
ATAD2B	ATAD2B	0.0145547	0.0407789
SEC14L1	SEC14L1	0.0145322	0.00109269
MBNL2	MBNL2	0.0145306	0.0403257
HNRNPA3	HNRNPA3	0.0145215	0.0499575
GPATCH2	GPATCH2	0.0145174	0.0514752
DNMT1	DNMT1	0.0145077	0.025229
NSRP1	NSRP1	0.0145012	0.0116941
SMCHD1	SMCHD1	0.0144946	0.00244695
ATP9B	ATP9B	0.0144818	0.0394977
SIPA1L1	SIPA1L1	0.0144713	0.0925508
TRIT1	TRIT1	0.014471	0.00745637
GABBR1	GABBR1	0.0144691	0.0473631
VPS41	VPS41	0.0144554	0.0118459
AKAP11	AKAP11	0.0144494	0.0127861
PDCD6IP	PDCD6IP	0.0144469	0.00404255
FSTL5	FSTL5	0.0144446	0.00298704
HERC2	HERC2	0.0144384	0.0406886
SLC4A10	SLC4A10	0.0144139	0.0533857
ADD1	ADD1	0.0144057	0.0292504
TUSC3	TUSC3	0.0144005	0.0819291
MED15	MED15	0.0143748	0.0213925
UBQLN1	UBQLN1	0.0143555	0.0541532
ROCK2	ROCK2	0.0143535	0.00304117
MLLT10	MLLT10	0.0143503	0.00286007
STXBP1	STXBP1	0.0143276	0.0442279
REV1	REV1	0.0143245	0.00237785
CAPZA1	CAPZA1	0.0143219	0.0250137
FAM213A	FAM213A	0.0143167	0.0540243
USP37	USP37	0.0143135	0.00395364
ADAM10	ADAM10	0.0143067	0.00118966
ZBTB44	ZBTB44	0.0143059	0.00354132
FAM13B	FAM13B	0.0143041	0.00337089
DZIP3	DZIP3	0.0143022	0.00481934
HFM1	HFM1	0.0143005	0.382354
LINC00630	LINC00630	0.0142986	0.00629431
KATNAL2	KATNAL2	0.0142845	0.0898318
XPO4	XPO4	0.0142453	0.00599773
NAA25	NAA25	0.0142437	0.025442
RANBP2	RANBP2	0.0142409	0.0041903
MBTPS1	MBTPS1	0.0142404	0.00320907
ZC3H15	ZC3H15	0.0142262	0.0437138
YME1L1	YME1L1	0.0142204	0.0220337
SFMBT2	SFMBT2	0.0142159	0.0147797
HNRNPU	HNRNPU	0.0142129	0.0765806
PUS7L	PUS7L	0.0141839	0.0152057
MEF2A	MEF2A	0.0141482	0.046978
ILF3	ILF3	0.0141422	0.00946828
URI1	URI1	0.0141214	0.0766563
AFF4	AFF4	0.0141165	0.000340261
HSPA1A	HSPA1A	0.0141117	0.572824
RIC8B	RIC8B	0.0141057	0.0231294
FBXL5	FBXL5	0.0141053	0.000269226
LRIG2	LRIG2	0.0141048	0.0601289
NEDD4L	NEDD4L	0.014089	0.0278878
ANKRD26	ANKRD26	0.0140517	0.0117663
ICE2	ICE2	0.0140505	0.0115053
PIK3CB	PIK3CB	0.0140497	0.00596307
UHRF1BP1L	UHRF1BP1L	0.0140471	0.0615637
DYRK1A	DYRK1A	0.0140413	0.00159219
PRKDC	PRKDC	0.0140331	0.0043778
FOXG1	FOXG1	0.0140331	0.00492318
XRN2	XRN2	0.0140308	0.00541777
CNOT6L	CNOT6L	0.0140176	0.000800396
SPTBN1	SPTBN1	0.0140073	0.0286609
COPG2	COPG2	0.0140037	0.16745
NADK2	NADK2	0.014003	6.45e-05
TBC1D32	TBC1D32	0.0140001	0.0717949
SH3GL3	SH3GL3	0.0139437	0.0586724
FAM208A	FAM208A	0.0139372	0.00627897
GOLGA8A	GOLGA8A	0.0139291	0.154979
RAPGEF5	RAPGEF5	0.0139185	0.145128
SRRM1	SRRM1	0.0139165	0.00112675
CNTNAP3B	CNTNAP3B	0.0139082	0.0328881
SSBP2	SSBP2	0.0139067	0.0259059
SF1	SF1	0.0139045	0.0317479
ATP6V1C1	ATP6V1C1	0.0138971	0.00622358
WDR33	WDR33	0.0138848	0.0267831
SETD2	SETD2	0.0138631	0.0212669
ATP6V1H	ATP6V1H	0.013863	0.0179873
ZNF680	ZNF680	0.0138628	0.0044182
RPL9	RPL9	0.0138392	0.16777
PI4KA	PI4KA	0.0138331	0.0128994
XPR1	XPR1	0.0138249	0.00250021
DDX5	DDX5	0.0138114	0.200799
CCDC7	CCDC7	0.0137987	0.0397281
RUFY3	RUFY3	0.0137965	0.0184358
PSEN1	PSEN1	0.0137816	0.0237691
DPYSL2	DPYSL2	0.0137752	0.0407105
FAM171A1	FAM171A1	0.0137672	0.0150723
HSP90AA1	HSP90AA1	0.0137608	0.498937
AC104806.2	AC104806.2	0.0137605	0.0217705
COG5	COG5	0.0137525	0.0165869
CCDC91	CCDC91	0.0137477	0.0170771
BIRC2	BIRC2	0.0137362	0.00600639
ST6GALNAC5	ST6GALNAC5	0.0137355	0.0140096
EVI5	EVI5	0.0137347	0.0208361
KIF1A	KIF1A	0.0137325	0.138312
TAF1	TAF1	0.0137265	0.0353019
SFPQ	SFPQ	0.0137224	0.0213043
UBE2B	UBE2B	0.0137211	0.167445
PARN	PARN	0.0137044	0.0600413
ADGRL2	ADGRL2	0.0136745	0.00951913
INTS8	INTS8	0.0136711	0.00111192
UCHL5	UCHL5	0.0136688	0.00507039
EP300	EP300	0.0136492	0.0189718
RPRD1B	RPRD1B	0.0136452	0.0589619
ATE1	ATE1	0.0136329	0.0106326
CEP126	CEP126	0.0136199	0.0930797
RPS6KA5	RPS6KA5	0.0136146	0.00963804
UBR3	UBR3	0.0135983	0.0314184
OTUD4	OTUD4	0.013591	0.0026439
ZFYVE16	ZFYVE16	0.0135847	0.0108054
GPR137B	GPR137B	0.0135657	0.00682996
NUBPL	NUBPL	0.0135645	0.0352824
AEBP2	AEBP2	0.0135503	0.00218879
VPS13D	VPS13D	0.0135412	0.0161067
PDCD7	PDCD7	0.0135365	0.0068152
ABI1	ABI1	0.0135362	0.00865263
SLC23A2	SLC23A2	0.0135353	0.00721939
RSRC2	RSRC2	0.0135268	0.0336487
TAX1BP1	TAX1BP1	0.0135198	0.000838561
VPS36	VPS36	0.0135173	0.0261432
BTBD8	BTBD8	0.0135073	0.0333544
LINC00632	LINC00632	0.013503	0.0799297
GPCPD1	GPCPD1	0.0134901	0.0992311
POM121	POM121	0.0134833	0.0358768
TMEM165	TMEM165	0.0134768	0.0135136
BTBD9	BTBD9	0.0134684	0.0876336
PHKB	PHKB	0.013456	0.0246008
ENOSF1	ENOSF1	0.0134531	0.21245
C1GALT1	C1GALT1	0.0134208	0.017192
THOC2	THOC2	0.0134032	0.00845248
HSP90B1	HSP90B1	0.0133942	0.165412
GATAD1	GATAD1	0.0133907	0.0754293
LINGO2	LINGO2	0.0133807	0.0105459
PDS5A	PDS5A	0.0133549	0.0351554
DICER1	DICER1	0.0133533	0.00243098
SNAP25	SNAP25	0.0133484	0.409907
TRIM44	TRIM44	0.0133346	0.120966
WDR26	WDR26	0.0133334	0.00691529
PSME4	PSME4	0.0133218	0.00843083
CNOT4	CNOT4	0.0133195	0.00217638
MON2	MON2	0.0133143	0.00663429
FTCDNL1	FTCDNL1	0.0132881	0.0145576
GPATCH8	GPATCH8	0.0132842	0.0281569
TUBGCP3	TUBGCP3	0.0132725	0.0206495
HTR2C	HTR2C	0.013269	0.123442
BTAF1	BTAF1	0.0132614	0.0691195
PER3	PER3	0.0132613	0.0686678
NAP1L1	NAP1L1	0.0132424	0.0275209
PNN	PNN	0.0132287	0.083181
ZNF334	ZNF334	0.0132197	0.00818434
MED12L	MED12L	0.0132169	0.0376975
NACA	NACA	0.013216	0.141809
NAPB	NAPB	0.0131994	0.07164
SORL1	SORL1	0.0131898	0.0484127
ZNF326	ZNF326	0.0131837	0.0427124
TARBP1	TARBP1	0.0131834	0.102134
SF3B1	SF3B1	0.0131793	0.0188943
FBXW7	FBXW7	0.0131765	0.0388402
KCNJ3	KCNJ3	0.0131468	0.0914663
AGO1	AGO1	0.0130692	0.0271141
HMGXB3	HMGXB3	0.0130614	0.0382693
ARAP2	ARAP2	0.0130231	0.0337275
UPF2	UPF2	0.0130175	0.0126037
AHCYL1	AHCYL1	0.013016	0.0527378
NFAT5	NFAT5	0.0129702	0.0828243
MEGF10	MEGF10	0.0129695	0.0444379
FBXO42	FBXO42	0.0129564	0.0178364
STRN	STRN	0.0129517	0.000536785
DNM1L	DNM1L	0.0129402	0.0550954
SNX30	SNX30	0.0129362	0.0565785
MTX2	MTX2	0.0129269	0.00119196
DDX6	DDX6	0.0129254	0.0376784
TOMM20	TOMM20	0.0129141	0.121851
ZNF292	ZNF292	0.0129055	0.000524721
UBAP2L	UBAP2L	0.0128952	0.000530705
USP33	USP33	0.0128918	0.00124251
ZNF569	ZNF569	0.0128846	0.00594479
ZMYM2	ZMYM2	0.0128834	0.00474631
LUC7L	LUC7L	0.012875	0.0800587
MED14	MED14	0.0128701	0.105526
WDR59	WDR59	0.0128619	0.0110122
STAG2	STAG2	0.0128608	0.000483078
RTCA	RTCA	0.0128548	0.0798611
RALGPS2	RALGPS2	0.0128385	0.00847578
NIN	NIN	0.0128325	0.0162603
SECISBP2L	SECISBP2L	0.0128208	0.00710879
VWA8	VWA8	0.0128189	0.0200374
RHOJ	RHOJ	0.0128133	0.0306381
ZFP90	ZFP90	0.0127938	0.0168003
ZNF148	ZNF148	0.0127875	0.00212112
UBE4B	UBE4B	0.0127855	0.0149776
CACNA1B	CACNA1B	0.0127808	0.0296849
SYT14	SYT14	0.0127702	0.0658188
VEZT	VEZT	0.0127688	0.0170424
VPS8	VPS8	0.0127647	0.0304183
SLC30A6	SLC30A6	0.0127628	0.00986061
SECISBP2	SECISBP2	0.0127528	0.0963631
EMC2	EMC2	0.0127522	0.000200364
FAR2	FAR2	0.012732	0.0752803
BRWD3	BRWD3	0.0127293	0.00167238
MYO9A	MYO9A	0.012717	0.0179651
RPL19	RPL19	0.0127143	0.280882
DROSHA	DROSHA	0.0127058	0.0091963
TULP4	TULP4	0.0127035	0.0209783
2022-03-08	2022-03-08	0.0126929	0.0192857
EPB41L1	EPB41L1	0.0126662	0.0252832
CEP83	CEP83	0.0126628	0.111528
RBM39	RBM39	0.0126615	0.00342952
MECP2	MECP2	0.0126529	0.0242045
PACS1	PACS1	0.0126524	0.0806619
PPM1A	PPM1A	0.0126449	0.021223
FBXW2	FBXW2	0.0126407	0.0613385
TTBK2	TTBK2	0.01263	0.00712104
FEZ1	FEZ1	0.0126296	0.062353
PPP6R2	PPP6R2	0.0126249	0.111009
CAST	CAST	0.012623	0.0130315
ARIH2	ARIH2	0.0126203	0.0646578
BCL2	BCL2	0.0126163	0.0665495
GNA13	GNA13	0.0125964	0.00741002
MANBA	MANBA	0.0125941	0.0396359
DIP2A	DIP2A	0.012592	0.0132382
NRG1	NRG1	0.0125885	0.0553613
GALK2	GALK2	0.0125882	0.00225185
ADAM32	ADAM32	0.0125868	0.0525549
PDS5B	PDS5B	0.0125835	0.0538908
ZNF609	ZNF609	0.012582	0.127369
HNRNPA2B1	HNRNPA2B1	0.0125812	0.115592
SPIRE1	SPIRE1	0.012581	0.0347995
COL19A1	COL19A1	0.0125805	0.24873
ADAM23	ADAM23	0.0125715	0.0763117
ZBTB37	ZBTB37	0.0125711	0.00751937
PTPN11	PTPN11	0.0125704	0.0233899
CDC73	CDC73	0.012569	0.000829364
RGS6	RGS6	0.0125616	0.0090468
CCSAP	CCSAP	0.0125471	0.00651694
ELF2	ELF2	0.0125372	0.000683592
EXOC6B	EXOC6B	0.012537	0.158443
ACTR3	ACTR3	0.0125335	0.00776233
ATP2C1	ATP2C1	0.0125318	0.204509
APTX	APTX	0.0125255	0.200628
ZNF568	ZNF568	0.0125182	0.0171101
PAPOLA	PAPOLA	0.0125109	0.282605
NUP153	NUP153	0.0125037	0.00457642
RAB28	RAB28	0.0124598	0.0246948
RBM26	RBM26	0.0124454	0.000505287
C10orf76	C10orf76	0.012442	0.0247684
PCF11	PCF11	0.0124412	0.0245993
FAM193A	FAM193A	0.012441	0.0388599
NELL2	NELL2	0.0124388	0.0905217
JMY	JMY	0.0124229	0.0475825
CEP170	CEP170	0.0123928	0.00127232
SPATA6L	SPATA6L	0.0123904	0.112302
TAMM41	TAMM41	0.0123831	0.0201988
SLK	SLK	0.0123713	0.0159338
GOLGA8B	GOLGA8B	0.0123607	0.276469
RSF1	RSF1	0.0123557	0.014661
TTC7B	TTC7B	0.0123445	0.0658675
ZNRF3	ZNRF3	0.012335	0.074259
EFNA5	EFNA5	0.0123339	0.0147603
SRSF10	SRSF10	0.0123336	0.0489358
SVIL-AS1	SVIL-AS1	0.0123336	0.0187772
TAF1D	TAF1D	0.0123277	0.0103418
GLUD1	GLUD1	0.0123223	0.00681216
PRMT3	PRMT3	0.0123222	0.137777
UHRF1BP1	UHRF1BP1	0.0122924	0.00814823
ZRANB2-AS2	ZRANB2-AS2	0.0122854	0.0115058
VPS13B	VPS13B	0.0122836	0.114303
S100PBP	S100PBP	0.0122815	0.0221201
ICE1	ICE1	0.0122737	0.00931439
TCAF1	TCAF1	0.0122657	0.107205
TM9SF3	TM9SF3	0.0122353	0.0136622
SPG11	SPG11	0.0122294	0.0237461
PICALM	PICALM	0.0122109	0.00230226
EIF5	EIF5	0.0121991	0.150523
TNPO3	TNPO3	0.0121924	0.0209106
RNF169	RNF169	0.0121913	0.0510242
RPL12	RPL12	0.0121906	0.230997
ASPH	ASPH	0.0121902	0.00129575
DNAJC13	DNAJC13	0.0121873	0.00159256
BMS1	BMS1	0.0121854	0.0105646
IDE	IDE	0.0121812	0.0209531
MTRNR2L8	MTRNR2L8	0.0121658	0.25657
KIAA1328	KIAA1328	0.012159	0.210095
TBC1D12	TBC1D12	0.0121573	0.00758677
SPEN	SPEN	0.012144	0.0270557
UQCC1	UQCC1	0.0121433	0.0284994
CDC40	CDC40	0.0121325	0.0148591
KANTR	KANTR	0.0121265	0.0197782
AL391807.1	AL391807.1	0.0121241	0.129292
TRAPPC11	TRAPPC11	0.0121168	0.00395018
RPTOR	RPTOR	0.012114	0.0389059
ACTN2	ACTN2	0.0121084	0.0670024
DMTF1	DMTF1	0.0120964	0.00158894
ACYP2	ACYP2	0.0120741	0.0944312
NEK1	NEK1	0.012074	0.00759901
WDPCP	WDPCP	0.0120702	0.106733
SEPT7P2	SEPT7P2	0.01207	0.00574738
CAMK1D	CAMK1D	0.0120681	0.162964
CCNY	CCNY	0.0120649	0.104014
AMD1	AMD1	0.0120505	0.0219648
MORC3	MORC3	0.0120461	0.00341655
TPR	TPR	0.0120413	0.00917698
LINC00882	LINC00882	0.0120395	0.0830501
GPBP1	GPBP1	0.0120368	0.0894331
RFLNA	RFLNA	0.0120361	0.0664878
ATG2B	ATG2B	0.0120347	0.00620103
AC009120.2	AC009120.2	0.0120236	0.0570239
MTMR3	MTMR3	0.0120224	0.107656
ASXL1	ASXL1	0.0120119	0.0252803
DDX39B	DDX39B	0.0120114	0.0136291
TTLL11	TTLL11	0.0120101	0.046412
USP36	USP36	0.0120036	0.0267382
RUFY2	RUFY2	0.0119932	0.000894306
MYH10	MYH10	0.0119917	0.0174787
ATRX	ATRX	0.0119769	0.0053881
BMT2	BMT2	0.0119762	0.156975
GLMN	GLMN	0.0119757	0.041669
UBAP1L	UBAP1L	0.0119729	0.00895181
HIPK1	HIPK1	0.0119632	0.00967071
RYK	RYK	0.0119473	0.00773973
AP2B1	AP2B1	0.0119411	0.00958941
DDX50	DDX50	0.0119372	0.00537842
ZNF706	ZNF706	0.0119268	0.0514406
JPX	JPX	0.0119188	0.00385452
USP10	USP10	0.0119138	0.0476714
MINK1	MINK1	0.0119104	0.00904973
KDM7A	KDM7A	0.0119065	0.0698614
HBP1	HBP1	0.0119025	0.0140066
SRFBP1	SRFBP1	0.0119021	0.00669862
YTHDF3	YTHDF3	0.0119012	0.00903152
USP40	USP40	0.011898	0.0121864
HBS1L	HBS1L	0.0118911	0.0386755
LRRC49	LRRC49	0.0118847	0.0484007
CDYL2	CDYL2	0.0118836	0.0230892
PDE1A	PDE1A	0.0118815	0.0241482
ZNF106	ZNF106	0.0118797	0.0329642
NASP	NASP	0.0118782	0.0540516
YARS	YARS	0.011869	0.163998
DTWD2	DTWD2	0.0118656	0.223845
DYNC1H1	DYNC1H1	0.0118649	0.0560867
USP31	USP31	0.0118415	0.0450168
ICA1L	ICA1L	0.0118382	0.0437923
SLC39A11	SLC39A11	0.0118332	0.18902
SMAP2	SMAP2	0.0118323	0.0137196
AK5	AK5	0.0118302	0.140029
FBXO3	FBXO3	0.01183	0.00811093
RPL10	RPL10	0.0118173	0.421062
MINDY3	MINDY3	0.0118164	0.0340258
ZNF25	ZNF25	0.011815	0.0603749
WDR70	WDR70	0.0117837	0.0735877
DTNB	DTNB	0.0117752	0.0888982
ERC1	ERC1	0.0117697	0.0412538
EIF3E	EIF3E	0.0117662	0.00346094
CNIH3	CNIH3	0.0117635	0.0458959
GATAD2B	GATAD2B	0.0117606	0.0409768
CDC5L	CDC5L	0.0117492	0.028021
MED23	MED23	0.0117444	0.028325
NLK	NLK	0.0117318	0.118817
MDN1	MDN1	0.011726	0.0192614
YTHDC1	YTHDC1	0.0117245	0.00243428
POT1	POT1	0.0117061	0.0387341
LRP2BP	LRP2BP	0.0117031	0.0894977
CELF2	CELF2	0.011697	0.161702
CEP295	CEP295	0.0116935	0.00579446
SUN1	SUN1	0.0116919	0.0441185
PTP4A2	PTP4A2	0.0116852	0.0262929
ARHGEF9	ARHGEF9	0.0116779	0.0108546
DENND1A	DENND1A	0.0116775	0.0630348
SS18	SS18	0.0116763	0.127766
ZNF254	ZNF254	0.0116733	0.0587425
FAM219A	FAM219A	0.0116651	0.0578241
HSPA4	HSPA4	0.0116633	0.308434
MFAP3L	MFAP3L	0.0116627	0.265604
LYPLAL1	LYPLAL1	0.011653	0.00399702
SLC30A9	SLC30A9	0.0116513	0.00366067
NUMB	NUMB	0.0116433	0.00370018
BSN	BSN	0.0116379	0.0872919
NAA15	NAA15	0.0116331	0.0274581
AP003108.2	AP003108.2	0.0116267	0.0638289
DDHD1	DDHD1	0.0116049	0.0822274
CALD1	CALD1	0.0116029	0.0274982
U2SURP	U2SURP	0.0116016	0.0259194
UBP1	UBP1	0.0115981	0.015268
SYNCRIP	SYNCRIP	0.0115951	0.0361254
TDRD3	TDRD3	0.0115913	0.0373181
SEC62	SEC62	0.0115807	0.21692
EPB41L2	EPB41L2	0.0115794	0.0992563
RAB2B	RAB2B	0.0115694	0.0160223
YPEL2	YPEL2	0.0115692	0.0036192
FRA10AC1	FRA10AC1	0.0115652	0.0631955
ARPC2	ARPC2	0.0115651	0.0337768
PPIP5K2	PPIP5K2	0.0115511	0.0153842
IREB2	IREB2	0.0115354	0.0107028
KANSL3	KANSL3	0.0115299	0.0442679
POM121C	POM121C	0.0115281	0.0161873
ATPAF1	ATPAF1	0.0115252	0.00144314
ZDBF2	ZDBF2	0.0115251	0.0062097
MNAT1	MNAT1	0.0115121	0.0218138
USPL1	USPL1	0.0115076	0.0484877
ATG5	ATG5	0.0115061	0.0269815
ADAR	ADAR	0.011503	0.00930164
UBAP2	UBAP2	0.0115025	0.081361
MAMLD1	MAMLD1	0.0115012	0.17771
UBAP1	UBAP1	0.0114918	0.0045953
RPS6KB1	RPS6KB1	0.0114864	0.00339822
STK24	STK24	0.0114828	0.0236448
TM9SF4	TM9SF4	0.0114809	0.00132597
HECTD2	HECTD2	0.0114721	0.012014
PTEN	PTEN	0.0114606	0.00628474
WDR47	WDR47	0.0114527	0.0280281
HMGN2	HMGN2	0.0114524	0.0235437
PCNX1	PCNX1	0.011451	0.026873
MAPK14	MAPK14	0.0114421	0.00815977
SRSF11	SRSF11	0.0114371	0.051283
ADCY2	ADCY2	0.0114174	0.0980652
EPS15L1	EPS15L1	0.0114138	0.0220707
OTULIN	OTULIN	0.0114102	0.0190564
SENP7	SENP7	0.0114012	0.00305605
MIA3	MIA3	0.0113762	0.00821188
LMBR1	LMBR1	0.0113711	0.0171676
KDM4C	KDM4C	0.0113696	0.0994655
ALG5	ALG5	0.0113654	0.0277303
SLF1	SLF1	0.0113592	0.0384839
PCNT	PCNT	0.0113503	0.017335
HEATR5B	HEATR5B	0.0113501	0.0325434
RPAP2	RPAP2	0.0113496	0.038324
CREBZF	CREBZF	0.0113423	0.00755572
CELF4	CELF4	0.0113389	0.086936
DPP8	DPP8	0.0113305	0.00392012
UBE2R2	UBE2R2	0.0113253	0.00705788
LINC00894	LINC00894	0.0113251	0.069749
REPS1	REPS1	0.0113144	0.0575469
STAT3	STAT3	0.0113068	0.148013
WDFY3	WDFY3	0.0113053	0.0201276
KIF21A	KIF21A	0.0112846	0.0242682
SART3	SART3	0.01128	0.00580744
TTC21B	TTC21B	0.0112783	0.00942207
CEP164	CEP164	0.0112664	0.070777
RPL34	RPL34	0.0112642	0.474069
NUP58	NUP58	0.0112463	0.0332817
PNPLA8	PNPLA8	0.0112424	0.116144
HP1BP3	HP1BP3	0.0112339	0.393017
SNX13	SNX13	0.0112289	0.00397548
CWF19L2	CWF19L2	0.0112278	0.12385
ZNF782	ZNF782	0.0112265	0.0449724
HSPBAP1	HSPBAP1	0.0112205	0.0128178
DMXL2	DMXL2	0.0112195	0.0912118
FCHO2	FCHO2	0.011216	0.00122371
VGLL4	VGLL4	0.0112033	0.0695627
PDE8A	PDE8A	0.0111889	0.252501
SACS	SACS	0.0111867	0.108303
MRPL42	MRPL42	0.0111832	0.0326834
CDK5RAP2	CDK5RAP2	0.0111743	0.0185132
LINC01535	LINC01535	0.0111683	0.0069085
ZNF84	ZNF84	0.0111663	0.0313809
XRCC5	XRCC5	0.0111657	0.00144279
KIRREL3	KIRREL3	0.0111619	0.220013
STK4	STK4	0.0111599	0.0268653
SREK1	SREK1	0.0111588	0.0105442
NDUFS4	NDUFS4	0.011149	0.044558
PHF20L1	PHF20L1	0.0111477	0.0380814
RPAP3	RPAP3	0.0111351	0.0111513
IL3RA	IL3RA	0.011106	0.208565
C6orf62	C6orf62	0.0111022	0.0354976
CDYL	CDYL	0.0111006	0.109149
LMAN1	LMAN1	0.0110844	0.0193642
VPS37A	VPS37A	0.0110802	0.00740263
TTC37	TTC37	0.0110796	0.00547277
MICU3	MICU3	0.0110757	0.0047469
HKR1	HKR1	0.0110594	0.0838383
AQP4	AQP4	0.0110585	0.136887
RPS27A	RPS27A	0.0110482	0.411962
DYNC2H1	DYNC2H1	0.011048	0.0329628
CFAP36	CFAP36	0.0110432	0.0175189
LATS1	LATS1	0.0110408	0.0638375
KPNA1	KPNA1	0.0110356	0.00475801
YEATS2	YEATS2	0.0110284	0.032705
PRH1	PRH1	0.0110274	0.0144196
TRIM33	TRIM33	0.0110269	0.0319828
HACE1	HACE1	0.0110202	0.00116354
BMPR1A	BMPR1A	0.0110199	0.0394396
USP15	USP15	0.0110198	0.000902077
AP3B1	AP3B1	0.0110159	0.0357806
TASP1	TASP1	0.0110106	0.0300052
PPP4R3B	PPP4R3B	0.0109913	0.0254362
ST7L	ST7L	0.0109867	0.00984398
KIDINS220	KIDINS220	0.0109857	0.00036233
PWAR5	PWAR5	0.0109828	0.00780126
NAPG	NAPG	0.0109826	0.0347391
HUWE1	HUWE1	0.0109821	0.00175977
SLAIN2	SLAIN2	0.0109818	0.0991031
TRMT11	TRMT11	0.0109791	0.0218379
ROCK1	ROCK1	0.0109762	0.00161034
TUBE1	TUBE1	0.0109652	0.0279723
SMURF2	SMURF2	0.0109623	0.024318
CEP95	CEP95	0.0109609	0.0547425
SCRN1	SCRN1	0.010956	0.0118088
ZNF519	ZNF519	0.0109524	0.00413469
CBX5	CBX5	0.0109506	0.0751293
HTT	HTT	0.0109506	0.0160204
AMBRA1	AMBRA1	0.0109444	0.121032
PPP1R21	PPP1R21	0.0109435	0.0468215
GABRA2	GABRA2	0.0109415	0.00292484
ARNTL	ARNTL	0.0109362	0.0152242
PQLC1	PQLC1	0.0109352	0.014314
ELL2	ELL2	0.0109169	0.104852
NBN	NBN	0.0109167	0.00275495
SRPK2	SRPK2	0.0109123	0.0129877
ZFR	ZFR	0.010906	0.0497139
XRN1	XRN1	0.0109007	0.0175492
PSMG4	PSMG4	0.0109001	0.0303781
UNC13C	UNC13C	0.0108929	0.0871276
ZNF507	ZNF507	0.010883	0.01316
ANKRD12	ANKRD12	0.0108778	0.061133
NCOA6	NCOA6	0.0108719	0.0094639
TMEM245	TMEM245	0.0108657	0.00270268
ZFAND5	ZFAND5	0.0108656	0.0926314
NPAS2	NPAS2	0.0108581	0.264338
CACYBP	CACYBP	0.0108444	0.369914
CU638689.5	CU638689.5	0.0108384	0.025299
DYNC1I1	DYNC1I1	0.0108374	0.111114
GNA12	GNA12	0.0108356	0.102829
RPS20	RPS20	0.0108346	0.162451
RB1CC1	RB1CC1	0.0108271	0.0230495
ZMAT1	ZMAT1	0.0108226	0.0162069
OSBPL11	OSBPL11	0.0108199	0.0281213
STON2	STON2	0.0108127	0.00669227
PCSK2	PCSK2	0.0108117	0.102941
ZNF621	ZNF621	0.0108114	0.0817009
SETD3	SETD3	0.0108082	0.0227803
CDC27	CDC27	0.0108079	0.0273543
SESN3	SESN3	0.0108037	0.167472
SUPT20H	SUPT20H	0.010799	0.024239
MTMR4	MTMR4	0.0107955	0.0142898
HMGB1	HMGB1	0.0107926	0.363876
WDR7	WDR7	0.0107911	0.11637
AC132008.2	AC132008.2	0.0107877	0.0341864
CTNND1	CTNND1	0.0107873	0.120854
TLK2	TLK2	0.0107849	0.0323017
ANKRD13D	ANKRD13D	0.0107826	0.0112479
PPP2R2A	PPP2R2A	0.0107742	0.0128531
TARS	TARS	0.0107709	0.0869849
HDLBP	HDLBP	0.0107689	0.0541143
CLK1	CLK1	0.0107685	0.35855
POLR3E	POLR3E	0.0107552	0.0634046
MOB1A	MOB1A	0.0107541	0.0209907
TNPO1	TNPO1	0.0107518	0.00306186
CIR1	CIR1	0.0107485	0.0436279
TBL1X	TBL1X	0.0107445	0.0934891
UBR4	UBR4	0.0107426	0.0101755
G2E3	G2E3	0.0107281	0.0203342
CALM2	CALM2	0.0107276	0.468831
ERGIC2	ERGIC2	0.0107142	0.000250249
UBN2	UBN2	0.0107132	0.0343515
RPL21	RPL21	0.0107067	0.417664
AKAP9	AKAP9	0.0106872	0.0338878
CBFA2T2	CBFA2T2	0.0106816	0.00898902
RPL39	RPL39	0.0106813	0.253886
RASA1	RASA1	0.0106757	0.00807289
TTC28-AS1	TTC28-AS1	0.0106736	0.031918
FBXW8	FBXW8	0.0106724	0.0550084
GCC2	GCC2	0.0106719	0.0640765
SAFB2	SAFB2	0.0106711	0.0813753
SPTLC1	SPTLC1	0.0106686	0.0471227
AGFG1	AGFG1	0.0106634	0.0423396
RFX3-AS1	RFX3-AS1	0.0106581	0.463052
ZNF451	ZNF451	0.010655	0.0371113
STAU1	STAU1	0.0106547	0.0289567
GOPC	GOPC	0.0106512	0.000965699
KIN	KIN	0.0106502	0.0142204
ACADM	ACADM	0.0106491	0.00165728
MGA	MGA	0.01064	0.0781244
CDV3	CDV3	0.0106347	0.0175478
TLK1	TLK1	0.0106347	0.00914125
MLH1	MLH1	0.0106303	0.0337669
CASC4	CASC4	0.0106227	0.0104147
NAA35	NAA35	0.0106168	0.00860912
HNRNPC	HNRNPC	0.0106164	0.0113882
CCDC30	CCDC30	0.0106164	0.0219087
DGKD	DGKD	0.0106126	0.0223077
TPST1	TPST1	0.0105974	0.383098
BTBD3	BTBD3	0.0105935	0.0533887
LMO3	LMO3	0.010593	0.15392
ENY2	ENY2	0.0105782	0.0540631
GRK3	GRK3	0.0105735	0.00507063
SAMD8	SAMD8	0.0105706	0.0830515
SGPP1	SGPP1	0.0105614	0.0256208
NCKAP1	NCKAP1	0.0105583	0.00107935
TXNDC15	TXNDC15	0.010558	0.113623
SPG7	SPG7	0.0105496	0.209295
STAM2	STAM2	0.0105431	0.0182711
CEP44	CEP44	0.0105427	0.0230083
ZNF83	ZNF83	0.0105373	0.13452
ATG14	ATG14	0.0105364	0.0530771
HSPD1	HSPD1	0.0105238	0.385639
UBAC2	UBAC2	0.0105237	0.10507
TRIM23	TRIM23	0.0105169	0.0361703
IFT74	IFT74	0.0105086	0.0221041
MTOR	MTOR	0.0105073	0.0347489
TOM1L2	TOM1L2	0.0105024	0.036605
TBC1D23	TBC1D23	0.0104901	0.000641734
YLPM1	YLPM1	0.0104817	0.0101429
RCOR1	RCOR1	0.0104693	0.0158213
TENM3	TENM3	0.0104626	0.0628548
GALNT11	GALNT11	0.0104608	0.0992003
SYN2	SYN2	0.0104588	0.201875
SIK2	SIK2	0.0104407	0.0431772
LINC01184	LINC01184	0.0104383	0.153494
USP8	USP8	0.0104364	0.00878274
CNTNAP3P2	CNTNAP3P2	0.0104254	0.048331
HMGN1	HMGN1	0.0104219	0.176649
RAB3GAP1	RAB3GAP1	0.01042	0.00857161
MKL2	MKL2	0.0104105	0.086048
CSNK1A1	CSNK1A1	0.0104053	0.000216273
MAP4K3	MAP4K3	0.0104045	0.00557815
SNX19	SNX19	0.0103997	0.112006
PRPF3	PRPF3	0.0103973	0.114261
RNF216	RNF216	0.0103869	0.0748612
AQR	AQR	0.0103856	0.0250545
2022-09-07	2022-09-07	0.0103836	0.022816
ZNF529	ZNF529	0.0103759	0.0225996
VAMP4	VAMP4	0.010375	0.00276193
CHD6	CHD6	0.0103748	0.0115304
ARID4B	ARID4B	0.0103726	0.0136303
METAP2	METAP2	0.0103593	0.0206145
SCAF8	SCAF8	0.0103448	0.0094461
PPP2R5C	PPP2R5C	0.0103441	0.06188
OLA1	OLA1	0.0103422	0.0679174
CSDE1	CSDE1	0.0103405	0.0104787
RNPC3	RNPC3	0.0103288	0.0316019
PRR14L	PRR14L	0.010325	0.105502
ST13	ST13	0.0103234	0.342355
NCOA7	NCOA7	0.0103208	0.0331202
WDR17	WDR17	0.0103207	0.0794364
TCERG1	TCERG1	0.010313	0.0325525
HIF1A	HIF1A	0.0103122	0.00676087
RASA2	RASA2	0.0103088	0.0375122
NECAB1	NECAB1	0.0103016	0.153025
AAK1	AAK1	0.0102987	0.0725116
ZNF236	ZNF236	0.0102924	0.0806452
EGLN1	EGLN1	0.0102923	0.00417811
ABCA5	ABCA5	0.0102889	0.236864
DAPK1	DAPK1	0.0102863	0.0535727
NRDC	NRDC	0.0102862	0.00865086
CD164	CD164	0.0102779	0.00569415
NEK10	NEK10	0.0102731	0.0538177
WNK1	WNK1	0.0102719	0.0269998
DDX46	DDX46	0.0102611	0.0479248
SCN8A	SCN8A	0.0102587	0.0722976
PRDM2	PRDM2	0.0102504	0.0531821
RPS2	RPS2	0.0102499	0.387363
MTURN	MTURN	0.0102436	0.0700614
AC097103.2	AC097103.2	0.0102361	0.0792716
ZZEF1	ZZEF1	0.0102126	0.121157
APLP2	APLP2	0.0102116	0.234687
FAM199X	FAM199X	0.0102094	0.0465463
ZFYVE26	ZFYVE26	0.010208	0.0487996
AADAT	AADAT	0.0101971	0.0204889
TNKS2	TNKS2	0.0101953	0.00188182
SYNJ1	SYNJ1	0.0101923	0.0223022
TMTC2	TMTC2	0.010183	0.30831
RABGAP1	RABGAP1	0.0101726	0.0538375
STIM2	STIM2	0.0101681	0.0121825
CEP120	CEP120	0.0101678	0.0241164
FOXK1	FOXK1	0.0101657	0.0313933
UHRF2	UHRF2	0.0101563	0.0969207
PPM1H	PPM1H	0.0101553	0.0788727
CUL1	CUL1	0.0101472	0.0301161
ARHGEF3	ARHGEF3	0.0101459	0.475833
FGD4	FGD4	0.0101399	0.000674833
PDHX	PDHX	0.0101381	0.0165753
RRAGB	RRAGB	0.0101366	0.0204976
FRYL	FRYL	0.0101333	0.120196
IPO5	IPO5	0.0101286	0.0205833
BRD1	BRD1	0.0101257	0.0621137
RAB21	RAB21	0.0101175	0.0129476
PAM	PAM	0.0101082	0.167507
ARFGEF1	ARFGEF1	0.0101078	0.0396099
ABI2	ABI2	0.0101071	0.0168214
MAP1A	MAP1A	0.0101041	0.367117
RAP1GAP	RAP1GAP	0.0101004	0.162555
TMOD2	TMOD2	0.0100975	0.0400725
RALGAPA1	RALGAPA1	0.0100915	0.00641862
EIF4H	EIF4H	0.0100903	0.0830645
KIAA0319L	KIAA0319L	0.0100883	0.0641122
ADK	ADK	0.0100832	0.178265
INSIG2	INSIG2	0.0100784	0.031683
CTNNA3	CTNNA3	0.0100781	0.263217
WASF2	WASF2	0.0100766	0.00496304
PPFIBP2	PPFIBP2	0.0100737	0.0728718
R3HDM1	R3HDM1	0.0100698	0.130023
SHMT1	SHMT1	0.0100608	0.0702544
VPS50	VPS50	0.0100599	0.0372611
RBFOX2	RBFOX2	0.0100598	0.0513244
DDX1	DDX1	0.0100494	0.0125663
NONO	NONO	0.0100418	0.0290481
DNM1	DNM1	0.0100382	0.287982
PUM1	PUM1	0.0100381	0.0137662
TRPC4AP	TRPC4AP	0.0100377	0.0281029
SACM1L	SACM1L	0.0100344	0.0228082
STX6	STX6	0.0100305	0.00826898
KIF5C	KIF5C	0.0100274	0.0943034
PLEKHH1	PLEKHH1	0.0100195	0.109602
PPHLN1	PPHLN1	0.0100181	0.0435779
AGO2	AGO2	0.0100166	0.0363517
MDM2	MDM2	0.0100076	0.0806296
PAK1	PAK1	0.0100059	0.0953864
TMEM232	TMEM232	0.0100032	0.120895
CTTN	CTTN	0.0100013	0.185193
ZFYVE9	ZFYVE9	0.0100003	0.11269
ELMOD2	ELMOD2	0.009998	0.00848014
TRAF6	TRAF6	0.00999354	0.0138594
MYEF2	MYEF2	0.00998554	0.0388332
SERINC1	SERINC1	0.00998553	0.272988
PAXBP1	PAXBP1	0.00997385	0.0179856
PCM1	PCM1	0.00997161	0.0211469
COPA	COPA	0.00996394	0.0316002
ZNF667	ZNF667	0.0099636	0.00519202
RPL23	RPL23	0.00996347	0.134524
NPRL3	NPRL3	0.00996346	0.0864584
FGFR1OP2	FGFR1OP2	0.00995192	0.129468
STX18	STX18	0.00994933	0.0919012
TSTD2	TSTD2	0.00994882	0.0680498
SCAI	SCAI	0.00994132	0.0168749
TCF20	TCF20	0.0099385	0.0750138
MRPL45P2	MRPL45P2	0.00993789	0.0270393
PRKCI	PRKCI	0.00993209	0.0116689
HERC4	HERC4	0.00992269	0.111533
ZRANB3	ZRANB3	0.00991553	0.0139761
XPOT	XPOT	0.00991117	0.00552144
PIAS1	PIAS1	0.00990679	0.0578953
CTTNBP2NL	CTTNBP2NL	0.00990083	0.0744414
ADAM17	ADAM17	0.00989304	0.018322
LPXN	LPXN	0.00988954	0.00131683
PLPP1	PLPP1	0.00988691	0.111442
VAPB	VAPB	0.00987888	0.0558614
USO1	USO1	0.00987565	0.170967
TOGARAM1	TOGARAM1	0.0098742	0.0447429
HMBOX1	HMBOX1	0.00987404	0.0651495
TAOK1	TAOK1	0.00987329	0.0515789
MED13	MED13	0.00987294	0.00453733
ACTR2	ACTR2	0.00986397	0.0726994
USP32	USP32	0.00986251	0.0579798
RNF185	RNF185	0.00985966	0.000191946
NDRG2	NDRG2	0.009856	0.328808
KIF1B	KIF1B	0.0098557	0.0759496
NUCKS1	NUCKS1	0.00985555	0.142555
TAB2	TAB2	0.00985349	0.170572
FUBP3	FUBP3	0.0098475	0.0541429
CDK7	CDK7	0.0098465	0.0237699
PFDN5	PFDN5	0.00984615	0.263946
STK3	STK3	0.00983913	0.332764
TDRP	TDRP	0.00983824	0.00630501
ASAP2	ASAP2	0.00983718	0.114675
ATAD1	ATAD1	0.00983559	0.0185087
SHPRH	SHPRH	0.00982984	0.0904906
EML4	EML4	0.00982321	0.099257
PPFIA1	PPFIA1	0.00981456	0.0465215
DENND4A	DENND4A	0.00981435	0.0346307
NCBP3	NCBP3	0.00980967	0.0296668
GRIPAP1	GRIPAP1	0.00980088	0.0370983
CDH8	CDH8	0.00979903	0.00490462
EEA1	EEA1	0.00979686	0.0330685
IFT43	IFT43	0.0097967	0.04646
IFT172	IFT172	0.00979664	0.0503534
TP53BP1	TP53BP1	0.0097946	0.0330207
RPS11	RPS11	0.00979454	0.257623
PCBP1-AS1	PCBP1-AS1	0.00977401	0.0204429
XPO6	XPO6	0.00977221	0.050192
C9orf3	C9orf3	0.00976867	0.0564308
LONP2	LONP2	0.00976669	0.00732776
MOB1B	MOB1B	0.00976436	0.0425845
GALR1	GALR1	0.0097564	0.240945
RPL7A	RPL7A	0.00975615	0.342511
CMSS1	CMSS1	0.00975302	0.104676
FMR1	FMR1	0.00974893	0.0179644
NPM1	NPM1	0.00974882	0.0599748
YWHAG	YWHAG	0.00973995	0.334251
DOPEY1	DOPEY1	0.00973689	0.0471982
GJA1	GJA1	0.0097356	0.0825929
NSD1	NSD1	0.00973487	0.0777319
KCMF1	KCMF1	0.00973373	0.0679407
PRKAR2B	PRKAR2B	0.00972615	0.0229145
GABRB3	GABRB3	0.00971856	0.107167
GALNT18	GALNT18	0.00971291	0.0159693
ATP8A1	ATP8A1	0.00970638	0.165069
PPP3CB	PPP3CB	0.00970556	0.0662683
AL353743.1	AL353743.1	0.00970112	0.107215
KAT7	KAT7	0.00969678	0.0274599
SMC1A	SMC1A	0.00969292	0.0067165
EPRS	EPRS	0.00969234	0.0495981
CCDC84	CCDC84	0.00969173	0.0813834
WASL	WASL	0.00967963	0.0122822
GNB1	GNB1	0.00967431	0.0438772
DEK	DEK	0.00967129	0.0028374
ARL14EP	ARL14EP	0.0096705	0.146481
FOCAD	FOCAD	0.00966821	0.139077
SMAP1	SMAP1	0.0096662	0.0759554
AUH	AUH	0.00966226	0.00517697
ANKRD46	ANKRD46	0.00966135	0.0194492
USP42	USP42	0.0096602	0.0556756
EIF2AK4	EIF2AK4	0.00965999	0.0133815
SELENOI	SELENOI	0.00965768	0.0493039
LIN54	LIN54	0.00965328	0.0404468
CAMSAP1	CAMSAP1	0.00964693	0.0196125
LMTK2	LMTK2	0.00964669	0.0165329
HERC3	HERC3	0.0096445	0.00255727
DNAJA1	DNAJA1	0.00964421	0.486809
HECTD4	HECTD4	0.00964142	0.10279
DCAF1	DCAF1	0.00964027	0.0877734
GALNT2	GALNT2	0.00963714	0.13475
GTF2H1	GTF2H1	0.00963079	0.0140355
CASC3	CASC3	0.00962651	0.0768822
ATP1B1	ATP1B1	0.0096246	0.446522
ARHGEF7	ARHGEF7	0.00962028	0.0135333
SUCO	SUCO	0.00961562	0.040529
EIF4E	EIF4E	0.0096156	0.0492701
NPEPPS	NPEPPS	0.00961501	0.0113139
C1D	C1D	0.00961414	0.0368977
FNBP1L	FNBP1L	0.00961249	0.051794
DAAM1	DAAM1	0.0096017	0.116526
COA1	COA1	0.00960108	0.105069
APC	APC	0.00960108	0.0141579
AP2A2	AP2A2	0.00959976	0.110217
FTO	FTO	0.00959899	0.134326
TAB1	TAB1	0.00959741	0.0750983
RPL14	RPL14	0.00959435	0.335823
SLMAP	SLMAP	0.00959062	0.0468284
BBS2	BBS2	0.00959007	0.00346016
TM2D1	TM2D1	0.00958701	0.0106045
ZNF420	ZNF420	0.00958503	0.0569473
NT5C2	NT5C2	0.0095824	0.00406727
ATP2A2	ATP2A2	0.00958178	0.0477087
BTRC	BTRC	0.00957802	0.102401
CD99L2	CD99L2	0.00957751	0.0338573
AC025171.1	AC025171.1	0.00957353	0.0413426
ARHGAP5	ARHGAP5	0.00956826	0.0585292
CHD2	CHD2	0.00956401	0.030581
STAU2	STAU2	0.00956191	0.044709
KIAA1551	KIAA1551	0.00955475	0.0201059
PANK2	PANK2	0.0095521	0.102637
WRN	WRN	0.00954283	0.107806
ITPKB	ITPKB	0.00954241	0.104485
SPTBN4	SPTBN4	0.00953271	0.203715
GPT2	GPT2	0.00952591	0.0456394
CTIF	CTIF	0.00952421	0.180178
ST6GALNAC3	ST6GALNAC3	0.00952034	0.175581
FREM2	FREM2	0.00951869	0.22003
RNF145	RNF145	0.00951796	0.00696788
WASHC2C	WASHC2C	0.00951584	0.004082
SPAG16	SPAG16	0.00951574	0.0190816
C1orf198	C1orf198	0.00951538	0.0698532
WAC	WAC	0.00951216	0.00803722
DNAJC10	DNAJC10	0.00951126	0.17486
STOX1	STOX1	0.0095096	0.0520226
ATXN2L	ATXN2L	0.00950764	0.022871
MKL1	MKL1	0.00949953	0.238688
BHLHE41	BHLHE41	0.00949798	0.026699
UBE2Q2P1	UBE2Q2P1	0.00949714	0.120989
RPL35A	RPL35A	0.00949704	0.425728
RPL6	RPL6	0.00949584	0.399205
SH3GL2	SH3GL2	0.00949309	0.096339
ALDH1L1	ALDH1L1	0.00949135	0.228985
PGP	PGP	0.00948754	0.0899887
EVA1C	EVA1C	0.00948373	0.108213
PPP4R2	PPP4R2	0.00948111	0.00810471
BOC	BOC	0.00947873	0.0231877
CYB5R4	CYB5R4	0.00947635	0.0638766
PHLDB1	PHLDB1	0.00947338	0.284227
JAM3	JAM3	0.00946861	0.198843
PRICKLE2	PRICKLE2	0.00946688	0.163832
SYTL2	SYTL2	0.00946637	0.0217454
DGCR8	DGCR8	0.00946394	0.0263627
MED12	MED12	0.00946346	0.00817896
PDXK	PDXK	0.00945727	0.174427
CCNL1	CCNL1	0.0094558	0.106394
SATB2	SATB2	0.00945101	0.0124408
WNK3	WNK3	0.00944951	0.214883
TNRC18	TNRC18	0.0094482	0.0710542
PTPN4	PTPN4	0.00944725	0.139322
ZNF737	ZNF737	0.00944681	0.049924
CALCOCO1	CALCOCO1	0.00944317	0.0141916
IFRD1	IFRD1	0.00943975	0.0280702
ARFIP1	ARFIP1	0.00943815	0.0805536
PPP2R2D	PPP2R2D	0.00943744	0.0175552
GNAL	GNAL	0.00943426	0.133222
NMD3	NMD3	0.00942222	0.154901
C20orf194	C20orf194	0.00941635	0.135085
CCP110	CCP110	0.00941322	0.0112728
ZNF577	ZNF577	0.00940857	0.0392161
SIN3A	SIN3A	0.00940852	0.011459
CRTC3	CRTC3	0.00940827	0.115714
PTPRN2	PTPRN2	0.00939671	0.156708
SLX4IP	SLX4IP	0.00939194	0.0260149
HECW2	HECW2	0.00939093	0.21175
RPRD2	RPRD2	0.00938969	0.0177866
ZC3H6	ZC3H6	0.00938918	0.170717
FAM168B	FAM168B	0.00938823	0.0557493
RAB27A	RAB27A	0.0093853	0.0824458
PPM1K	PPM1K	0.00938249	0.22262
CNTNAP2	CNTNAP2	0.00937721	0.526164
HCN1	HCN1	0.00937162	0.0408173
WDR75	WDR75	0.00937149	0.0238522
ALDH3A2	ALDH3A2	0.00936999	0.0143506
PEBP1	PEBP1	0.00936986	0.491918
SKI	SKI	0.00936955	0.0451209
DDX3X	DDX3X	0.00936929	0.0162887
NMNAT3	NMNAT3	0.00936624	0.147887
TRA2B	TRA2B	0.00936546	0.0883249
UIMC1	UIMC1	0.00936542	0.0380625
ABCD3	ABCD3	0.00936481	0.078626
PPM1L	PPM1L	0.00936433	0.132982
ABCB10	ABCB10	0.00936419	0.076657
PAK3	PAK3	0.00936149	0.0777178
PARG	PARG	0.00935687	0.0576582
SLC25A28	SLC25A28	0.00935478	0.0194147
SEL1L	SEL1L	0.00934696	0.0143352
LZTS3	LZTS3	0.00934569	0.19041
WWP1	WWP1	0.00934454	0.0324233
ANKH	ANKH	0.00933641	0.0467766
BX322639.1	BX322639.1	0.00933563	0.055928
ZNF160	ZNF160	0.00933339	0.0628193
ALDH7A1	ALDH7A1	0.0093296	0.066153
ADCY5	ADCY5	0.00932923	0.116739
HACL1	HACL1	0.00931813	0.0596029
NUMA1	NUMA1	0.00931785	0.00562869
C5orf15	C5orf15	0.00931766	0.0689422
VPS54	VPS54	0.00931586	0.0549893
RNF8	RNF8	0.00931425	0.0102557
SPTAN1	SPTAN1	0.00930873	0.0748228
ZRANB1	ZRANB1	0.00930491	0.0341657
NDUFA5	NDUFA5	0.00930041	0.0876571
HUS1	HUS1	0.00929963	0.00914945
ZCCHC17	ZCCHC17	0.00929629	0.193948
CRLS1	CRLS1	0.00929577	0.0248987
STXBP5	STXBP5	0.00928188	0.0652262
LRRC1	LRRC1	0.00928021	0.0178343
ALG8	ALG8	0.0092788	0.0293432
ETFDH	ETFDH	0.00926941	0.0281959
PSMD1	PSMD1	0.00926807	0.0377727
RRAGD	RRAGD	0.00926532	0.0527027
TBCE	TBCE	0.00926366	0.0115345
UBXN4	UBXN4	0.00926242	0.0208292
WDR36	WDR36	0.00926141	0.0159761
SMARCA2	SMARCA2	0.00925834	0.185323
BRD7	BRD7	0.00924719	0.0128701
FBXL20	FBXL20	0.00924345	0.0494148
SSFA2	SSFA2	0.00924189	0.0287759
TAF2	TAF2	0.00924179	0.0464745
RADIL	RADIL	0.00923951	0.0432296
CACNA1D	CACNA1D	0.00923827	0.202403
JAK1	JAK1	0.00923508	0.0569907
PTGES3	PTGES3	0.00922943	0.574086
POU2F1	POU2F1	0.0092286	0.102443
KDM1B	KDM1B	0.00922637	0.0815411
GALNTL6	GALNTL6	0.00922394	0.211631
RPS21	RPS21	0.00922391	0.357512
PTBP3	PTBP3	0.00922347	0.0845977
HNRNPDL	HNRNPDL	0.00922049	0.317455
ECHDC1	ECHDC1	0.00921864	0.021018
CRYBG3	CRYBG3	0.00920397	0.004569
SKP2	SKP2	0.00919536	0.00796306
RB1	RB1	0.00919027	0.0809319
UBE2D3	UBE2D3	0.00918422	0.215683
ZNF227	ZNF227	0.00918315	0.0437761
MLH3	MLH3	0.00917467	0.0361716
EFCAB14	EFCAB14	0.00917393	0.0555261
PSIP1	PSIP1	0.00917368	0.0920338
FASTKD2	FASTKD2	0.0091702	0.00918315
SPPL3	SPPL3	0.00916967	0.0940328
NAA16	NAA16	0.00916614	0.380768
SOCS5	SOCS5	0.00916569	0.0671295
ZDHHC20	ZDHHC20	0.00916266	0.0562802
ANKIB1	ANKIB1	0.00915469	0.0525831
REPS2	REPS2	0.00915266	0.12003
HOOK3	HOOK3	0.00914865	0.0355046
FTL	FTL	0.00914204	0.640872
CARS2	CARS2	0.00914044	0.0157527
CNOT6	CNOT6	0.00913519	0.11572
EXOC3	EXOC3	0.00913483	0.0293208
GDAP2	GDAP2	0.0091322	0.0283265
RBM4	RBM4	0.00912675	0.283232
VIPAS39	VIPAS39	0.0091267	0.010457
AVL9	AVL9	0.00912387	0.0236751
ZDHHC17	ZDHHC17	0.00912195	0.0124387
BRF1	BRF1	0.00912044	0.0077484
SLC25A13	SLC25A13	0.00911822	0.186394
LAMP2	LAMP2	0.00911801	0.0998691
COG7	COG7	0.00911768	0.097083
HCFC2	HCFC2	0.00911386	0.0206444
RCL1	RCL1	0.0091115	0.0264914
HNRNPR	HNRNPR	0.00910286	0.161823
RPL41	RPL41	0.00909653	0.515862
SUPT6H	SUPT6H	0.00909502	0.105847
FAM126B	FAM126B	0.00909375	0.00729994
PRIMPOL	PRIMPOL	0.00908623	0.0118062
AGPS	AGPS	0.0090862	0.0647022
JAK2	JAK2	0.00908139	0.0161411
INO80D	INO80D	0.00908033	0.0956219
GNAO1	GNAO1	0.00907786	0.19447
RN7SKP203	RN7SKP203	0.00907746	0.577326
IFNAR1	IFNAR1	0.00906808	0.0359538
TBC1D22A	TBC1D22A	0.00906754	0.24363
UBE2V2	UBE2V2	0.009062	0.0776616
AQP4-AS1	AQP4-AS1	0.00905965	0.0148264
PSPC1	PSPC1	0.00905452	0.121703
AKAP13	AKAP13	0.00903486	0.102198
SBNO1	SBNO1	0.00903384	0.0769924
ACAP2	ACAP2	0.00902607	0.0162112
THRAP3	THRAP3	0.00902562	0.089232
TPT1-AS1	TPT1-AS1	0.00902306	0.0202107
SHISA6	SHISA6	0.00902154	0.306008
TMTC1	TMTC1	0.00901452	0.0306022
HAP1	HAP1	0.00901279	0.351479
CYTH1	CYTH1	0.00900319	0.0156122
LIN52	LIN52	0.00900136	0.0515524
OTUD6B	OTUD6B	0.00899996	0.00203766
UNC5C	UNC5C	0.00899204	0.358262
DLG5	DLG5	0.00899062	0.1698
AGO4	AGO4	0.00899008	0.0619802
STT3B	STT3B	0.00898753	0.023333
UBE2Q2P2	UBE2Q2P2	0.00897853	0.217844
AATF	AATF	0.00897678	0.0267319
EXOC1	EXOC1	0.00897536	0.0104587
GRM1	GRM1	0.0089726	0.00423956
INPP5B	INPP5B	0.0089712	0.0253427
STAM	STAM	0.00896739	0.0308481
SREBF1	SREBF1	0.00894794	0.0140085
COX7A2L	COX7A2L	0.00894421	0.114598
OSBPL6	OSBPL6	0.00894337	0.0949013
ST7	ST7	0.00894161	0.0255726
DENR	DENR	0.00893706	0.0936089
STRN3	STRN3	0.00893414	0.0652799
PAN3	PAN3	0.00892917	0.0353038
EIF5B	EIF5B	0.00892779	0.155634
UBA6	UBA6	0.00892388	0.00437753
STRBP	STRBP	0.00892303	0.105541
IP6K1	IP6K1	0.00891897	0.0577129
LONRF2	LONRF2	0.00891876	0.110491
CDS2	CDS2	0.00891573	0.0436832
METAP1	METAP1	0.00891123	0.0485769
SNHG14	SNHG14	0.00890469	0.0386033
SBF2	SBF2	0.00890393	0.176131
ANKDD1A	ANKDD1A	0.00890295	0.186567
CLHC1	CLHC1	0.00890103	0.0901757
TPCN1	TPCN1	0.00890043	0.0986851
USP16	USP16	0.0089002	0.0533991
PPP1R10	PPP1R10	0.00889463	0.0325177
AFF1	AFF1	0.00889356	0.0630149
CFDP1	CFDP1	0.00889211	0.192333
GNPAT	GNPAT	0.00888526	0.0082824
PTPN12	PTPN12	0.00888251	0.0445671
DNAJC7	DNAJC7	0.0088786	0.0987677
IQGAP1	IQGAP1	0.00887375	0.0256975
AMPH	AMPH	0.008861	0.0912913
ZNF595	ZNF595	0.00884329	0.0278431
WDFY2	WDFY2	0.00884207	0.0535208
THUMPD2	THUMPD2	0.00884053	0.00982487
FAM169A	FAM169A	0.00883798	0.0918375
MVB12B	MVB12B	0.00883545	0.116116
CUL9	CUL9	0.0088342	0.00795642
KLHL2	KLHL2	0.00883243	0.0295721
GLCE	GLCE	0.00882846	0.0945707
DTWD1	DTWD1	0.00882727	0.0287649
TIAM1	TIAM1	0.00882622	0.265327
ARHGAP12	ARHGAP12	0.00882539	0.0851789
RPL15	RPL15	0.00882182	0.502816
ZNF876P	ZNF876P	0.00882042	0.0270661
RPL3	RPL3	0.00881763	0.540833
PIK3C3	PIK3C3	0.00880625	0.00191486
GOSR1	GOSR1	0.00880114	0.0720186
ANXA7	ANXA7	0.00880011	0.0809191
PCDHA4	PCDHA4	0.00879744	0.00387192
INIP	INIP	0.00879737	0.0153961
RAP1GDS1	RAP1GDS1	0.0087946	0.0464814
DENND5B	DENND5B	0.00879283	0.104432
GIT2	GIT2	0.00879157	0.00601229
ZNRF1	ZNRF1	0.00878274	0.105018
TAF11	TAF11	0.00878229	0.00792213
SAP130	SAP130	0.00877953	0.0682978
MGRN1	MGRN1	0.00877732	0.0500927
ARID1A	ARID1A	0.00877474	0.0669171
SUCLG1	SUCLG1	0.00877383	0.0242168
EPG5	EPG5	0.00877307	0.0642053
SNX2	SNX2	0.00876827	0.00377492
SCAPER	SCAPER	0.00876353	0.132516
GAS7	GAS7	0.00876237	0.168212
ME3	ME3	0.00875475	0.091652
GOLPH3	GOLPH3	0.00875341	0.0376721
RFC1	RFC1	0.00875299	0.0609115
TOPBP1	TOPBP1	0.00875172	0.0109366
ARFGEF2	ARFGEF2	0.00875018	0.137815
YWHAQ	YWHAQ	0.00873855	0.156555
HNRNPH3	HNRNPH3	0.00873523	0.0567722
UBE2G2	UBE2G2	0.00873105	0.10677
TMEM41B	TMEM41B	0.00872814	0.0645742
GALC	GALC	0.00872715	0.00872081
CFLAR	CFLAR	0.00872511	0.0701638
AZIN1	AZIN1	0.00872333	0.131973
COG2	COG2	0.00871681	0.00896009
PPP2R5E	PPP2R5E	0.00871679	0.0569062
GRB10	GRB10	0.00871649	0.0270485
TFCP2	TFCP2	0.0087024	0.162737
MRE11	MRE11	0.00870154	0.0241655
RNF111	RNF111	0.00870146	0.175227
NSUN2	NSUN2	0.00869848	0.00711334
RPRD1A	RPRD1A	0.00869265	0.0725356
ZNF891	ZNF891	0.00869221	0.0483404
FAM208B	FAM208B	0.00869177	0.101824
VPS45	VPS45	0.0086914	0.0845406
ARPP19	ARPP19	0.00869118	0.370428
CNRIP1	CNRIP1	0.00868928	0.058036
SCAF4	SCAF4	0.00868094	0.0238734
SIN3B	SIN3B	0.00868065	0.0915628
NELFA	NELFA	0.0086757	0.0687955
ZFAT	ZFAT	0.00866492	0.0178195
UBE3C	UBE3C	0.00866429	0.0339362
HABP4	HABP4	0.00866401	0.0192077
AC245060.4	AC245060.4	0.00865659	0.0367591
DYM	DYM	0.00865357	0.0647496
MBD2	MBD2	0.00864774	0.0500961
SMARCAD1	SMARCAD1	0.00863665	0.0266143
ZNF383	ZNF383	0.00863641	0.0527266
POLN	POLN	0.00863161	0.268513
INTS3	INTS3	0.00862858	0.0616983
METTL16	METTL16	0.00862785	0.0533399
AMER2	AMER2	0.00862758	0.304089
ELMO1	ELMO1	0.00862631	0.263197
FBXL16	FBXL16	0.00862298	0.131285
NETO2	NETO2	0.00862226	0.119076
NAF1	NAF1	0.00862161	0.00491771
MERTK	MERTK	0.00862095	0.20547
BBIP1	BBIP1	0.00862018	0.0340769
CBL	CBL	0.00861894	0.018551
ENTPD3-AS1	ENTPD3-AS1	0.00861298	0.151585
TRDMT1	TRDMT1	0.00861214	0.0236831
ITGB1	ITGB1	0.00860945	0.231723
STAG1	STAG1	0.00860857	0.179696
POLK	POLK	0.00860202	0.0388575
NDEL1	NDEL1	0.00860029	0.0277964
RIC1	RIC1	0.00859974	0.0893988
TSPYL4	TSPYL4	0.00859897	0.270606
ENC1	ENC1	0.00859884	0.378454
MED27	MED27	0.00859766	0.0952703
CCDC14	CCDC14	0.0085916	0.0337003
VPS53	VPS53	0.00858859	0.0935751
ABR	ABR	0.00856621	0.143432
MTHFD2	MTHFD2	0.0085653	0.0945104
UBR5	UBR5	0.00856462	0.0354619
CEP290	CEP290	0.00855968	0.137267
ACAD9	ACAD9	0.00855921	0.0135003
CCNH	CCNH	0.00855122	0.00581707
RPL8	RPL8	0.00854607	0.422618
FAM135B	FAM135B	0.00854578	0.235748
LCOR	LCOR	0.00854552	0.0436583
GFM2	GFM2	0.00854406	0.106916
IFFO1	IFFO1	0.00854388	0.0672047
MAPKAP1	MAPKAP1	0.00853926	0.092996
SYTL4	SYTL4	0.00853718	0.116672
SLC9A8	SLC9A8	0.00853656	0.0454883
CYFIP1	CYFIP1	0.00853553	0.0288736
FUBP1	FUBP1	0.00853541	0.060608
ZNF445	ZNF445	0.00853484	0.0823373
G3BP2	G3BP2	0.00853137	0.0833476
LRP12	LRP12	0.00852913	0.163682
CHD8	CHD8	0.00852678	0.0099019
ULK2	ULK2	0.00851674	0.172771
DNAH7	DNAH7	0.00849607	0.0240651
MTPAP	MTPAP	0.00849268	0.112598
ZNF26	ZNF26	0.00849066	0.17181
RC3H2	RC3H2	0.00849037	0.0350312
C2CD3	C2CD3	0.00849021	0.0203
HSPA4L	HSPA4L	0.008488	0.593355
IPO7	IPO7	0.00848158	0.0157889
MTPN	MTPN	0.00848001	0.0917354
SMARCC1	SMARCC1	0.00847792	0.223843
FBXO21	FBXO21	0.00846506	0.085637
PNMA2	PNMA2	0.00846034	0.212632
RAB3GAP2	RAB3GAP2	0.00845155	0.0164299
PEX7	PEX7	0.00844502	0.103326
XPA	XPA	0.008443	0.0724083
SEMA6D	SEMA6D	0.00844135	0.250425
SETD4	SETD4	0.00843781	0.0198824
PITPNM2	PITPNM2	0.00843675	0.078808
SENP5	SENP5	0.00843658	0.147793
EXOC5	EXOC5	0.00843182	0.034771
UHMK1	UHMK1	0.00843165	0.0388964
RYBP	RYBP	0.00843074	0.0826288
SENP6	SENP6	0.00843028	0.0466431
GRAMD2B	GRAMD2B	0.00843019	0.0720985
USP7	USP7	0.00842992	0.0222268
ESYT2	ESYT2	0.0084291	0.105102
ZNF510	ZNF510	0.00841521	0.0528632
TET2	TET2	0.0084134	0.0101699
MIR4300HG	MIR4300HG	0.00841226	0.349323
INVS	INVS	0.00841074	0.211421
CLTA	CLTA	0.00840811	0.110977
DTNA	DTNA	0.00840681	0.121082
SNX27	SNX27	0.00839758	0.196021
POLR1D	POLR1D	0.0083972	0.00454287
ATG4C	ATG4C	0.00839651	0.0771637
TLN1	TLN1	0.00839544	0.0168655
FLVCR1	FLVCR1	0.00839398	0.0515727
NDFIP2	NDFIP2	0.00839304	0.0620397
KCNB1	KCNB1	0.00838817	0.193344
EPB41L4B	EPB41L4B	0.00838671	0.0665603
TCEA1	TCEA1	0.00838447	0.0418215
RPS7	RPS7	0.00838362	0.388509
APPBP2	APPBP2	0.00838269	0.0239623
WASF3	WASF3	0.00838255	0.0763318
MAP7D2	MAP7D2	0.00837522	0.106007
DGKH	DGKH	0.00837274	0.197927
PIGN	PIGN	0.00837041	0.0179692
ABL2	ABL2	0.00836967	0.215036
NFKB1	NFKB1	0.00836915	0.0904324
LINS1	LINS1	0.00836489	0.0492505
USP25	USP25	0.00836326	0.0655243
DHX9	DHX9	0.00835806	0.0347399
PPP6R3	PPP6R3	0.00834985	0.0222198
EFCAB13	EFCAB13	0.00834908	0.424742
HECTD1	HECTD1	0.00834875	0.0945622
HSP90AB1	HSP90AB1	0.00834419	0.621884
FAM189A2	FAM189A2	0.00833935	0.0226209
ZNF41	ZNF41	0.00833781	0.0388828
RPLP2	RPLP2	0.00833665	0.495397
FNIP1	FNIP1	0.0083243	0.317644
ASCC3	ASCC3	0.00832171	0.155292
NEFL	NEFL	0.00832008	0.466936
LRRC8B	LRRC8B	0.0083174	0.197465
DYNC1LI2	DYNC1LI2	0.00831721	0.0470266
STXBP3	STXBP3	0.00830547	0.0890622
GRIN2B	GRIN2B	0.0083031	0.348744
KIAA1211L	KIAA1211L	0.00830081	0.209014
TMEM164	TMEM164	0.00830034	0.0879059
TYW1	TYW1	0.00829935	0.263398
ZNF471	ZNF471	0.00829186	0.0743407
CTDSPL	CTDSPL	0.00828555	0.324222
MFSD14C	MFSD14C	0.00828127	0.143622
ZNRD1ASP	ZNRD1ASP	0.0082763	0.0374979
SPART	SPART	0.00827451	0.351412
GFOD1	GFOD1	0.00827228	0.0892241
KCNN3	KCNN3	0.00826308	0.0174206
DPY19L4	DPY19L4	0.00825542	0.0264955
TXNL1	TXNL1	0.00825283	0.0873365
BTBD10	BTBD10	0.00823982	0.0718626
NUP214	NUP214	0.00823924	0.0325632
TMCC1	TMCC1	0.00823563	0.0831764
FAM120C	FAM120C	0.00823478	0.0413004
SLC25A16	SLC25A16	0.0082337	0.0974368
GSK3B	GSK3B	0.00822767	0.142675
CDK13	CDK13	0.00822619	0.0986012
PCDHGC3	PCDHGC3	0.00821961	0.105882
ZCCHC14	ZCCHC14	0.0082189	0.114963
PHTF1	PHTF1	0.00821467	0.121562
KRIT1	KRIT1	0.00821321	0.0210812
ANKMY2	ANKMY2	0.00820877	0.0963101
ZBTB25	ZBTB25	0.00820714	0.0247433
SPAST	SPAST	0.00819897	0.0842036
IGF1R	IGF1R	0.00819839	0.112618
RNF213	RNF213	0.00819323	0.11981
CD46	CD46	0.00819265	0.086694
CAB39	CAB39	0.00819144	0.19763
PCNX4	PCNX4	0.00819012	0.14761
CWC22	CWC22	0.00819004	0.0663571
PARP14	PARP14	0.00818533	0.283493
C14orf132	C14orf132	0.00818233	0.102739
CDH26	CDH26	0.00818093	0.00217278
EED	EED	0.00817894	0.0319332
SGTB	SGTB	0.00817681	0.00484671
CDC42SE2	CDC42SE2	0.00817407	0.0408258
WASHC5	WASHC5	0.00817244	0.0368744
AGPAT5	AGPAT5	0.00817149	0.115396
GSAP	GSAP	0.00816769	0.217323
EFCAB6	EFCAB6	0.00816631	0.102676
SCFD1	SCFD1	0.0081633	0.176354
USP22	USP22	0.00816191	0.0374536
SLC38A1	SLC38A1	0.00816141	0.226829
CNOT2	CNOT2	0.00815984	0.0661889
SFXN5	SFXN5	0.00815864	0.159098
SH3BGRL2	SH3BGRL2	0.00815806	0.0338265
LRRCC1	LRRCC1	0.00815545	0.0212815
ZNF736	ZNF736	0.00815155	0.20131
ARHGEF10L	ARHGEF10L	0.00813513	0.162815
SNX4	SNX4	0.00813408	0.0966512
TMEM116	TMEM116	0.0081286	0.0289669
CCDC57	CCDC57	0.008127	0.139493
SRSF7	SRSF7	0.00812514	0.462657
MPC1	MPC1	0.00812079	0.04465
ANAPC5	ANAPC5	0.00811817	0.0631827
SMC5	SMC5	0.00811789	0.0129558
KAT14	KAT14	0.00811311	0.0484774
ANKRD17	ANKRD17	0.00810946	0.0191192
JADE1	JADE1	0.00810904	0.0384561
KDM5B	KDM5B	0.00810767	0.00405871
TACC1	TACC1	0.00810521	0.0416472
DCUN1D5	DCUN1D5	0.00810401	0.071129
OSBPL2	OSBPL2	0.00809907	0.0179198
ZNF720	ZNF720	0.00809809	0.00711558
CSTF3	CSTF3	0.00809366	0.0666925
MAP3K4	MAP3K4	0.00808944	0.016835
UNC13A	UNC13A	0.00808933	0.158312
POLDIP3	POLDIP3	0.00807811	0.0388881
RLF	RLF	0.00807752	0.0741975
FAM107A	FAM107A	0.00807275	0.359267
DCP2	DCP2	0.00806432	0.0300291
UBR1	UBR1	0.00806349	0.102045
ASXL2	ASXL2	0.00806299	0.0506947
SLC25A46	SLC25A46	0.00806275	0.0468249
KDM3A	KDM3A	0.00805638	0.0708157
SLC11A2	SLC11A2	0.00805567	0.105628
ANKS1A	ANKS1A	0.00805565	0.17538
STAG3	STAG3	0.00804781	0.23787
PLEKHA8	PLEKHA8	0.00804726	0.00365842
NEBL	NEBL	0.00804646	0.302681
SMC6	SMC6	0.00804382	0.153771
PARP1	PARP1	0.00804139	0.0621502
SLC1A4	SLC1A4	0.00803909	0.0818461
MAIP1	MAIP1	0.00803877	0.32578
DHFR	DHFR	0.00803541	0.5944
ZHX3	ZHX3	0.00803394	0.198746
CCDC28A	CCDC28A	0.00803219	0.0423939
RPS4X	RPS4X	0.00802831	0.349153
PDIA6	PDIA6	0.00802807	0.147827
SYBU	SYBU	0.00802721	0.0372635
MAP2K4	MAP2K4	0.00802503	0.315636
SNRPA1	SNRPA1	0.00802457	0.0453285
KCNC2	KCNC2	0.00802158	0.0398036
MPRIP	MPRIP	0.00801946	0.0818353
FAU	FAU	0.00801381	0.481167
HUNK	HUNK	0.00801359	0.475423
RALGAPB	RALGAPB	0.00801287	0.0189519
NOL7	NOL7	0.0080088	0.0268224
MPP6	MPP6	0.00800438	0.130333
DHX15	DHX15	0.00800361	0.0394685
NEK5	NEK5	0.00800196	0.0473352
KIAA0586	KIAA0586	0.00800071	0.0763133
SND1	SND1	0.00800058	0.281768
LCMT1	LCMT1	0.00800056	0.0406035
OSBPL1A	OSBPL1A	0.00799828	0.219221
INPP5A	INPP5A	0.00799622	0.298513
SASH1	SASH1	0.00799508	0.230887
MAP2K5	MAP2K5	0.00799456	0.195231
ZNF283	ZNF283	0.00799215	0.0813155
PCDH10	PCDH10	0.00799212	0.169272
HGSNAT	HGSNAT	0.00797984	0.324481
CCDC47	CCDC47	0.00797936	0.13107
IDH3A	IDH3A	0.00797723	0.030272
AKAP12	AKAP12	0.00797664	0.371811
TJP1	TJP1	0.00797448	0.226273
WDR37	WDR37	0.00796875	0.0268851
CMC1	CMC1	0.00796849	0.113409
ATP11B	ATP11B	0.00796735	0.00789888
TTLL4	TTLL4	0.00796698	0.0317215
RPS25	RPS25	0.00796371	0.533033
SV2B	SV2B	0.00796325	0.185787
RGPD6	RGPD6	0.00795979	0.0613459
UTP23	UTP23	0.00795834	0.490758
SERBP1	SERBP1	0.00795424	0.0476719
USP47	USP47	0.00795087	0.111242
GTF3C1	GTF3C1	0.00794441	0.0877112
FAIM	FAIM	0.00792592	0.0550689
KRBOX4	KRBOX4	0.00792563	0.0125822
CFAP161	CFAP161	0.00792428	0.309241
SERGEF	SERGEF	0.0079203	0.229093
NARS	NARS	0.00791794	0.163717
PITPNB	PITPNB	0.00791672	0.00479144
SUGT1	SUGT1	0.00791245	0.405769
MEF2C-AS1	MEF2C-AS1	0.00791184	0.352809
PRPF40A	PRPF40A	0.00789878	0.0627669
ZNRF2	ZNRF2	0.00789644	0.202884
SENP2	SENP2	0.00789451	0.0841685
GABBR2	GABBR2	0.00789118	0.332645
ZCCHC11	ZCCHC11	0.00788659	0.00953501
CDH11	CDH11	0.00787895	0.114803
GAPVD1	GAPVD1	0.00787694	0.0190158
DNAJC3	DNAJC3	0.007872	0.162821
RHEB	RHEB	0.00786266	0.145193
PARGP1	PARGP1	0.00786098	0.226302
C11orf80	C11orf80	0.00785675	0.0554016
ZDHHC3	ZDHHC3	0.00785617	0.0321684
INTS4	INTS4	0.00785424	0.0200469
C12orf45	C12orf45	0.00785289	0.0728972
RTN4	RTN4	0.00785134	0.159798
LAS1L	LAS1L	0.00784811	0.0330222
RNMT	RNMT	0.00784757	0.169574
RPL35	RPL35	0.00784742	0.437393
SNHG6	SNHG6	0.00784073	0.116604
KLC1	KLC1	0.00783315	0.233271
NUTM2B-AS1	NUTM2B-AS1	0.00783252	0.183239
SNX14	SNX14	0.0078322	0.0811483
LINC01252	LINC01252	0.00783156	0.0430587
ALOX12P2	ALOX12P2	0.007825	0.0587072
GRB2	GRB2	0.00782213	0.117446
ACTR3C	ACTR3C	0.00782013	0.165999
NELL1	NELL1	0.00781785	0.57296
NOS1AP	NOS1AP	0.0078116	0.287469
RSRC1	RSRC1	0.00780895	0.0657563
NCL	NCL	0.00780726	0.231628
FERMT2	FERMT2	0.00780395	0.0450321
PIK3C2B	PIK3C2B	0.00780387	0.0421366
RAB40B	RAB40B	0.0078038	0.153311
GRM3	GRM3	0.00780077	0.156929
METTL5	METTL5	0.00779958	0.00229727
WHRN	WHRN	0.00779325	0.263358
XPO7	XPO7	0.00778456	0.0823068
FBXO38	FBXO38	0.00777688	0.0335652
NWD2	NWD2	0.00777672	0.0108083
NARF	NARF	0.00777521	0.0558189
SMARCA5	SMARCA5	0.00777336	0.0333218
DIP2C	DIP2C	0.00777193	0.172671
SUPV3L1	SUPV3L1	0.00777157	0.0160369
XIAP	XIAP	0.00777085	0.158551
LARP1B	LARP1B	0.00776803	0.0213938
JAKMIP3	JAKMIP3	0.00776519	0.154806
SCAF11	SCAF11	0.0077645	0.0396737
DBT	DBT	0.0077602	0.0185597
MCMBP	MCMBP	0.00775715	0.0579157
2022-03-06	2022-03-06	0.00775273	0.36095
AC105383.1	AC105383.1	0.00775062	0.0621048
SPIRE2	SPIRE2	0.00774825	0.0989916
MAPK6	MAPK6	0.00774805	0.0630319
CADPS2	CADPS2	0.00774718	0.161419
ODF2L	ODF2L	0.00774481	0.0547889
TXNRD1	TXNRD1	0.00774129	0.00169208
ATP6AP1L	ATP6AP1L	0.00774118	0.0847667
RBM17	RBM17	0.00773262	0.0153239
RAB6B	RAB6B	0.00772884	0.206018
AC005154.1	AC005154.1	0.00772771	0.034225
ELP3	ELP3	0.00772764	0.0550309
MTMR12	MTMR12	0.00772642	0.153345
RALGAPA2	RALGAPA2	0.00772441	0.225187
C1orf52	C1orf52	0.00772299	0.114518
KLHL24	KLHL24	0.00772031	0.0982718
AKAP7	AKAP7	0.00771906	0.0334104
NR1D2	NR1D2	0.00771831	0.122789
ZNF573	ZNF573	0.00771631	0.0714208
PHACTR1	PHACTR1	0.00771526	0.332108
RHOQ	RHOQ	0.00771419	0.0210133
STX7	STX7	0.0077137	0.0659847
G3BP1	G3BP1	0.007707	0.13988
ZDHHC21	ZDHHC21	0.00770574	0.108914
ABL1	ABL1	0.00770202	0.0875527
SGK3	SGK3	0.0077013	0.210451
MCCC1	MCCC1	0.00770085	0.0667615
COMMD2	COMMD2	0.00769937	0.222698
SIAH1	SIAH1	0.00769779	0.0997037
ME1	ME1	0.00769218	0.0866072
CCDC144A	CCDC144A	0.00769067	0.182533
TTC8	TTC8	0.00768856	0.0942643
RPIA	RPIA	0.0076874	0.0360727
RPL27A	RPL27A	0.00768701	0.489136
TOP2B	TOP2B	0.00768595	0.09662
SMAD2	SMAD2	0.00768524	0.0670595
ZFP37	ZFP37	0.00768221	0.0441152
GNAI1	GNAI1	0.00767992	0.17438
PTK2B	PTK2B	0.00767871	0.0692904
EIF3A	EIF3A	0.00767783	0.0247029
AP1G1	AP1G1	0.00767722	0.198397
SCN2A	SCN2A	0.00767627	0.0880638
RGPD1	RGPD1	0.00767592	0.0322009
TPM1	TPM1	0.00767429	0.0436773
CCDC92	CCDC92	0.00767266	0.0770696
VIM	VIM	0.0076685	0.147619
MTF2	MTF2	0.00766722	0.0696106
TTC19	TTC19	0.00766591	0.12488
NUP133	NUP133	0.00766242	0.0977865
TMSB4X	TMSB4X	0.00766117	0.651181
PCNP	PCNP	0.00765669	0.0893324
LRRC39	LRRC39	0.00765611	0.028415
NCOA5	NCOA5	0.00765516	0.116556
PPIEL	PPIEL	0.0076541	0.179539
TXLNG	TXLNG	0.007652	0.0218492
MINDY2	MINDY2	0.00765137	0.0625841
MAPKAPK5	MAPKAPK5	0.00765081	0.065153
LNPK	LNPK	0.00765047	0.130458
ZNF506	ZNF506	0.00764165	0.0140312
GGA2	GGA2	0.00763813	0.0669522
CFAP97	CFAP97	0.00763345	0.0261124
ITPR1	ITPR1	0.00761986	0.156224
MSH4	MSH4	0.00761448	0.25261
LRRC37A4P	LRRC37A4P	0.00761335	0.0805692
MTO1	MTO1	0.00760896	0.0345571
ETNK1	ETNK1	0.00760693	0.359705
IQCA1	IQCA1	0.00760069	0.00505527
PPP2R1B	PPP2R1B	0.00759971	0.0469069
SMG1P1	SMG1P1	0.00759797	0.330607
TRAPPC12	TRAPPC12	0.00759195	0.0712457
UBE2H	UBE2H	0.0075908	0.0540657
ZC3H8	ZC3H8	0.00759044	0.143318
ACTN1	ACTN1	0.00758687	0.0438069
TPM3	TPM3	0.00758644	0.0434248
SYN1	SYN1	0.00758541	0.26566
MAN1A1	MAN1A1	0.00758413	0.00212679
DCAF16	DCAF16	0.00757814	0.0890822
MPHOSPH8	MPHOSPH8	0.00757791	0.389712
CDK6	CDK6	0.00757781	0.154519
LINC01551	LINC01551	0.00757507	0.0151278
MRPS30	MRPS30	0.00756859	0.0198266
SERPINI1	SERPINI1	0.00756858	0.301708
WDR44	WDR44	0.00756684	0.00917188
BORCS5	BORCS5	0.0075603	0.244574
FAM221A	FAM221A	0.00755811	0.371277
RAB11FIP2	RAB11FIP2	0.00755596	0.0454506
TRPM3	TRPM3	0.00755456	0.541115
CYLD	CYLD	0.00755287	0.00602074
CREG2	CREG2	0.0075499	0.29859
HSPE1	HSPE1	0.00754964	0.556391
PFKFB3	PFKFB3	0.0075489	0.238824
DCBLD2	DCBLD2	0.00754605	0.0943404
EIF3H	EIF3H	0.00754364	0.0817186
SMAD4	SMAD4	0.00754299	0.0343514
PPA2	PPA2	0.00754272	0.0912952
TSNARE1	TSNARE1	0.00754167	0.0505725
ANKRD10	ANKRD10	0.00753997	0.484411
COPS4	COPS4	0.00753452	0.0616012
ZNF331	ZNF331	0.0075327	0.0152782
MIPOL1	MIPOL1	0.00753264	0.265449
MAPT-AS1	MAPT-AS1	0.00752508	0.474207
SRP68	SRP68	0.00752493	0.0939584
UQCRB	UQCRB	0.00752402	0.498722
ELK4	ELK4	0.00752057	0.00910272
RGPD2	RGPD2	0.00752035	0.0267798
AFG3L2	AFG3L2	0.00752011	0.0515813
ITSN2	ITSN2	0.00751649	0.192257
ERVK13-1	ERVK13-1	0.00750889	0.0307562
BAZ2B	BAZ2B	0.00750833	0.0751502
HIBCH	HIBCH	0.00749953	0.548545
AP4E1	AP4E1	0.0074982	0.0425737
ZNF546	ZNF546	0.00749762	0.177004
ANGEL2	ANGEL2	0.00749427	0.167364
UTP18	UTP18	0.00749371	0.00903796
LIMS1	LIMS1	0.00749281	0.139219
DNAJB14	DNAJB14	0.00749051	0.16592
CPSF6	CPSF6	0.0074869	0.0411996
USP53	USP53	0.00748635	0.13512
HIVEP1	HIVEP1	0.00748611	0.0394418
MSANTD4	MSANTD4	0.00748122	0.138316
ERP44	ERP44	0.00748075	0.0519802
YBX1	YBX1	0.00748051	0.353056
HIF1AN	HIF1AN	0.00747988	0.0191308
CKAP5	CKAP5	0.00747861	0.0228266
HS3ST4	HS3ST4	0.00747817	0.0372371
WASF1	WASF1	0.00747744	0.100456
SLF2	SLF2	0.0074744	0.213044
SEC23IP	SEC23IP	0.00747197	0.129246
COIL	COIL	0.00747031	0.00724409
WDR19	WDR19	0.00746974	0.0264972
NCK1	NCK1	0.0074648	0.207712
SHQ1	SHQ1	0.00746427	0.0542449
RPS14	RPS14	0.00746263	0.546687
PGAP1	PGAP1	0.00746188	0.357123
TLN2	TLN2	0.00746128	0.29565
MTERF1	MTERF1	0.00745894	0.227367
BBS9	BBS9	0.00745807	0.14782
DYNLL1	DYNLL1	0.00745755	0.566195
GLB1	GLB1	0.0074571	0.191018
RBSN	RBSN	0.0074565	0.0262514
RGPD5	RGPD5	0.00744299	0.353953
ZNF532	ZNF532	0.00744017	0.152937
RNF11	RNF11	0.00743952	0.031677
ZNF682	ZNF682	0.00743812	0.292933
LRP6	LRP6	0.00743585	0.136929
FTH1	FTH1	0.00743476	0.0103426
SLC39A14	SLC39A14	0.00742952	0.0968989
CTNNBL1	CTNNBL1	0.00742905	0.0955301
TANK	TANK	0.00742875	0.107529
SAP30	SAP30	0.00742813	0.00347147
CHFR	CHFR	0.00742451	0.0580168
RGS20	RGS20	0.00742248	0.00574224
BCLAF3	BCLAF3	0.00741708	0.0663228
IWS1	IWS1	0.00741606	0.215496
PIP4P2	PIP4P2	0.00741408	0.0285622
AP3D1	AP3D1	0.00740674	0.0880281
ICK	ICK	0.00740612	0.0223094
ANKLE2	ANKLE2	0.00740498	0.0274325
ZNF235	ZNF235	0.00740326	0.105458
RNU6-6P	RNU6-6P	0.00740116	0.485264
SAMD12	SAMD12	0.00739734	0.334584
DPY19L1P1	DPY19L1P1	0.00739669	0.233055
RIMKLB	RIMKLB	0.00739366	0.0475421
EZH1	EZH1	0.00739264	0.0910155
HOMER1	HOMER1	0.00739193	0.134096
FNDC3A	FNDC3A	0.00739192	0.0723251
RFX4	RFX4	0.00737876	0.101714
SLC18B1	SLC18B1	0.00737816	0.205036
IQCE	IQCE	0.00737653	0.0687334
SAFB	SAFB	0.00736534	0.0733648
MAML1	MAML1	0.00736443	0.106602
GMCL1	GMCL1	0.00736336	0.023692
DHRSX	DHRSX	0.00736035	0.212348
R3HDM2	R3HDM2	0.00735879	0.0567254
NUP54	NUP54	0.00735667	0.0313296
RANBP9	RANBP9	0.00735468	0.0534606
COG6	COG6	0.00735084	0.0183798
RSBN1	RSBN1	0.00734509	0.0108315
SEC31A	SEC31A	0.00734228	0.0571891
RNF4	RNF4	0.00733816	0.0568167
NOP58	NOP58	0.0073316	0.078458
PNPT1	PNPT1	0.00732831	0.038396
ZNF317	ZNF317	0.00732498	0.029413
AC109466.1	AC109466.1	0.00732469	0.0181857
PEX2	PEX2	0.00732215	0.082922
PRMT2	PRMT2	0.00732146	0.239896
RASAL2	RASAL2	0.00732127	0.279729
ABCB7	ABCB7	0.00731887	0.0487341
SEPSECS	SEPSECS	0.00731546	0.0514452
ZYG11B	ZYG11B	0.00731493	0.118244
RNF141	RNF141	0.00731296	0.03762
ILKAP	ILKAP	0.00731216	0.0925742
SRPK1	SRPK1	0.00731155	0.0410704
HDAC8	HDAC8	0.00730632	0.241724
ATL1	ATL1	0.00730513	0.082347
MIER1	MIER1	0.00730279	0.208721
MTA3	MTA3	0.00730263	0.0217799
XPNPEP1	XPNPEP1	0.00730167	0.011364
DLG1	DLG1	0.0072999	0.213678
PXK	PXK	0.00729853	0.213632
ZNF208	ZNF208	0.00729834	0.11546
MORC4	MORC4	0.00728957	0.170703
LINC00909	LINC00909	0.00728953	0.010419
MRPS35	MRPS35	0.00728386	0.0186495
ERCC6	ERCC6	0.00727846	0.03835
FAM76B	FAM76B	0.00726865	0.0150775
LARS2	LARS2	0.0072681	0.0170707
C5orf51	C5orf51	0.0072679	0.0153384
COG3	COG3	0.0072658	0.0748262
EEPD1	EEPD1	0.00726252	0.0354736
RBL2	RBL2	0.00725949	0.0987743
ATP10D	ATP10D	0.0072561	0.143277
CWF19L1	CWF19L1	0.0072559	0.0100102
MARF1	MARF1	0.00725281	0.116627
SHTN1	SHTN1	0.00725234	0.315883
FAM156A	FAM156A	0.0072503	0.0465843
ARHGEF12	ARHGEF12	0.00724918	0.057148
GTPBP10	GTPBP10	0.00724839	0.0268788
ZNF592	ZNF592	0.00724553	0.0964527
CMIP	CMIP	0.00724385	0.31413
MTMR2	MTMR2	0.0072438	0.121163
RNPEP	RNPEP	0.00723652	0.198467
COPB2	COPB2	0.00723288	0.0875349
MFSD6	MFSD6	0.00723278	0.124588
POLR1B	POLR1B	0.00722879	0.0620385
SLC10A7	SLC10A7	0.00722262	0.109228
CA5B	CA5B	0.00722038	0.151798
DLD	DLD	0.00721796	0.0861597
RBM41	RBM41	0.00721429	0.0536816
TOGARAM2	TOGARAM2	0.0072141	0.0553788
NME3	NME3	0.00721288	0.246188
ARID4A	ARID4A	0.00721056	0.123807
KBTBD3	KBTBD3	0.00720858	0.0088232
RHOBTB3	RHOBTB3	0.00719978	0.200971
IARS2	IARS2	0.00719928	0.012621
EPB41L3	EPB41L3	0.00719876	0.193967
SON	SON	0.0071976	0.334128
OXCT1	OXCT1	0.00719685	0.0953207
WWP2	WWP2	0.00719453	0.158689
OBSL1	OBSL1	0.00719422	0.0536242
GPSM2	GPSM2	0.00719327	0.0348457
RUNDC3A	RUNDC3A	0.00719224	0.172243
[truncated: 14,956 more rows]

## Sheet: OL_regression
	Gene	Coefficient	p.val
AC007325.4	AC007325.4	-0.00250701	0.202355
TCEAL3	TCEAL3	0.00349044	0.380984
BEX2	BEX2	0.00859895	0.180071
PGK1	PGK1	0.00611041	0.324914
TSPAN7	TSPAN7	0.00221547	0.743991
TMSB4X	TMSB4X	0.0128588	0.281711
MRPL41	MRPL41	-0.00481782	0.344956
GRIN1	GRIN1	0.00274666	0.748428
PTGDS	PTGDS	-0.0526673	0.00921246
MAPKAP1	MAPKAP1	0.00610025	0.134783
ATP6V1G1	ATP6V1G1	0.000325766	0.949557
HNRNPK	HNRNPK	0.00186865	0.655733
RPS6	RPS6	0.00869144	0.294801
EIF3E	EIF3E	0.00446877	0.240908
CLU	CLU	0.0140001	0.254747
NEFL	NEFL	0.00906989	0.412633
PTPRN2	PTPRN2	0.0148129	0.0317453
DYNC1I1	DYNC1I1	0.00171332	0.686903
PURB	PURB	0.00141215	0.775759
PPIA	PPIA	-0.00292498	0.683582
CDK13	CDK13	0.00870159	0.128956
NDUFA4	NDUFA4	0.010769	0.275062
RRS1	RRS1	-6.59394e-05	0.942955
PSMG3	PSMG3	-0.00254647	0.244268
SYNE1	SYNE1	0.0277039	0.00561525
AL356599.1	AL356599.1	-0.0012071	0.658811
FAM110B	FAM110B	0.00170734	0.167861
TSPYL1	TSPYL1	0.00121523	0.845741
PPIL6	PPIL6	-0.00198416	0.212971
HSP90AB1	HSP90AB1	0.0101888	0.508706
RPL10A	RPL10A	0.00404472	0.511425
ATP6V1G2	ATP6V1G2	-0.00147277	0.624652
ZKSCAN8	ZKSCAN8	0.0107823	0.0504426
NOL7	NOL7	0.00926012	0.00669882
TUBB2B	TUBB2B	-0.000460342	0.944101
FLOT1	FLOT1	-0.0048174	0.120403
CXXC5	CXXC5	-0.0102541	0.0795473
MATR3	MATR3	0.0174813	0.0277573
VDAC1	VDAC1	0.00641237	0.149925
MEF2C	MEF2C	0.0171459	0.0943004
SMN1	SMN1	-0.00998229	0.00404411
TCEAL2	TCEAL2	0.00358244	0.551418
SMN2	SMN2	-0.00704401	0.0460667
SUB1	SUB1	0.00631977	0.211969
BASP1	BASP1	0.00712796	0.456461
RETREG1	RETREG1	-0.00603838	0.471133
RPS20	RPS20	0.0146237	0.00948773
CPE	CPE	0.0253687	0.0362921
CISD2	CISD2	-0.00253753	0.480147
HNRNPDL	HNRNPDL	0.0072883	0.134407
TBC1D1	TBC1D1	0.00598019	0.0267775
QDPR	QDPR	-0.019783	0.0260415
ADD1	ADD1	0.00587425	0.259934
NSD2	NSD2	0.00292206	0.521945
SLBP	SLBP	-0.0202573	0.264707
IQCJ-SCHIP1	IQCJ-SCHIP1	0.0128218	0.264434
H1FX	H1FX	-0.0107952	0.104399
TCEAL6	TCEAL6	0.00331138	0.416277
RAB7A	RAB7A	0.00441572	0.162024
FAM162A	FAM162A	0.00138673	0.550919
SHISA5	SHISA5	-0.00239971	0.249743
SETMAR	SETMAR	-0.000265923	0.918758
PRKAG2-AS1	PRKAG2-AS1	-0.000532628	0.680968
DGCR6L	DGCR6L	-0.00375948	0.106891
DGCR6	DGCR6	-0.00449318	0.118531
SMIM11A	SMIM11A	-0.00578529	0.143981
SON	SON	0.00408995	0.294875
SOD1	SOD1	0.00528679	0.637298
SMIM11B	SMIM11B	-0.0082345	0.0569479
TAF1	TAF1	0.00301988	0.492605
CDH4	CDH4	0.00123288	0.751855
RPL32	RPL32	0.0173758	0.1273
BLCAP	BLCAP	0.00414535	0.247751
NORAD	NORAD	0.00668668	0.380532
MAP1B	MAP1B	0.0196216	0.0619348
PDRG1	PDRG1	0.000425722	0.749823
NSFL1C	NSFL1C	-0.0020685	0.257805
ITM2C	ITM2C	-0.00742014	0.155553
RPL37A	RPL37A	0.0170561	0.0329272
SPATS2L	SPATS2L	-8.2384e-05	0.99251
CHN1	CHN1	0.0121229	0.304558
RASGEF1B	RASGEF1B	-0.0212412	0.0866913
ORC4	ORC4	0.00950158	0.0332817
CMSS1	CMSS1	0.00703374	0.0937596
RPL6	RPL6	0.0091657	0.301098
ANAPC16	ANAPC16	-0.00944954	0.362822
DCTN2	DCTN2	0.0025908	0.401088
SRSF5	SRSF5	0.0104451	0.128906
GPX4	GPX4	-0.000175805	0.979136
CCDC59	CCDC59	0.00373888	0.678342
TPT1	TPT1	0.0180033	0.147192
MYL6	MYL6	-0.00789463	0.214152
GTF3C6	GTF3C6	0.00108531	0.69387
CWC15	CWC15	0.00300544	0.334259
BEX1	BEX1	0.0103176	0.283202
ATP6V1F	ATP6V1F	-0.00208531	0.683299
PSMC6	PSMC6	-0.000242229	0.903715
FHL1	FHL1	0.00117784	0.567071
PFDN5	PFDN5	0.00917232	0.123127
ARF5	ARF5	-0.00179959	0.43115
MLLT11	MLLT11	-0.00274809	0.37575
RNPS1	RNPS1	0.00302483	0.258984
ZCRB1	ZCRB1	-0.000234396	0.926822
SSB	SSB	0.00456966	0.409157
DYNLL1	DYNLL1	0.0104366	0.331089
PFKP	PFKP	0.00201549	0.529845
COPS7A	COPS7A	-0.00290896	0.110636
SERPINI1	SERPINI1	-0.00297138	0.618342
TMEM120B	TMEM120B	-0.00156034	0.396188
UBE4A	UBE4A	-0.00216589	0.760407
NUCKS1	NUCKS1	0.00509617	0.304793
DNAJB6	DNAJB6	0.00323407	0.798761
NDUFC2	NDUFC2	-0.0153816	0.0757339
CDC42	CDC42	0.00326134	0.654465
SUMO2	SUMO2	-0.00276089	0.656468
RPL35	RPL35	0.0083202	0.262418
NDUFS8	NDUFS8	-0.00803238	0.058307
NRXN3	NRXN3	-0.0105045	0.327823
LDHB	LDHB	-0.000733628	0.915383
ISCA1	ISCA1	0.00462248	0.191346
FAU	FAU	0.00959965	0.276369
RPL27	RPL27	0.00553111	0.346291
PLD3	PLD3	0.00151555	0.685187
CELF1	CELF1	0.011999	0.0382722
MPHOSPH10	MPHOSPH10	0.00591349	0.103122
NDUFB10	NDUFB10	-0.00114059	0.819587
THYN1	THYN1	-0.00306279	0.212051
LINC00294	LINC00294	-0.00280804	0.0905107
C11orf58	C11orf58	0.00519831	0.201311
HLTF	HLTF	0.00546824	0.220549
PSMA1	PSMA1	0.00112488	0.482029
HRAS	HRAS	-0.00146125	0.601662
LRRC27	LRRC27	0.00112479	0.215113
MRPL57	MRPL57	0.00296246	0.428218
COX6A1	COX6A1	-0.00926757	0.282157
THRA	THRA	0.000853771	0.839252
ZNF638	ZNF638	0.00237261	0.424531
ATP2B1	ATP2B1	0.0149178	0.0547869
PPT1	PPT1	-0.00235597	0.295542
RPS18	RPS18	0.0191933	0.0292013
SCG5	SCG5	0.000546267	0.929525
HSP90B1	HSP90B1	0.00196107	0.74781
RPL19	RPL19	0.0148775	0.118531
YWHAG	YWHAG	0.0100495	0.324763
PFDN4	PFDN4	0.000494398	0.788419
RNH1	RNH1	-0.00882377	0.0732476
RNF11	RNF11	0.0062888	0.0424117
YTHDF2	YTHDF2	-0.00166807	0.611601
KCNAB2	KCNAB2	0.00355649	0.291624
ACTB	ACTB	-0.00506726	0.447553
RPL4	RPL4	0.000576549	0.933957
ADD2	ADD2	0.00343681	0.32526
MRPL30	MRPL30	2.80071e-05	0.970795
TESC	TESC	-0.000527854	0.599908
SH3PXD2A	SH3PXD2A	0.00349884	0.658466
AP2M1	AP2M1	-0.00391813	0.482228
ACBD7	ACBD7	-0.000260959	0.675975
CLDND1	CLDND1	-0.0168554	0.0220147
PFDN2	PFDN2	-0.00188293	0.757577
BTF3	BTF3	-0.000974898	0.897963
AASDHPPT	AASDHPPT	-0.00227555	0.558498
SGIP1	SGIP1	0.0157174	0.021539
HSP90AA1	HSP90AA1	-0.0041302	0.755459
RPS5	RPS5	-0.00336773	0.692898
SNX3	SNX3	0.00222395	0.796072
YWHAH	YWHAH	0.000484552	0.960837
UBC	UBC	0.0141776	0.202042
TPI1	TPI1	-0.0080943	0.219563
EEF1A1	EEF1A1	0.00304213	0.733109
FAM13A	FAM13A	0.00242149	0.558148
PPP2R1A	PPP2R1A	-0.000341234	0.919513
H2AFZ	H2AFZ	-0.000379545	0.958626
C1orf216	C1orf216	-0.000456012	0.765104
GPR162	GPR162	0.00118118	0.582841
NFU1	NFU1	-0.00103994	0.793433
SNCB	SNCB	-0.00068467	0.908957
SELENOW	SELENOW	0.0021992	0.782274
ZNF252P	ZNF252P	-0.0054903	0.0420272
TKT	TKT	-0.000581587	0.914756
CFL1	CFL1	-0.0161373	0.0651893
CHD5	CHD5	0.00516592	0.209848
TCEAL1	TCEAL1	-0.00246906	0.543714
NPM1	NPM1	0.0118836	0.0498285
RPL11	RPL11	0.012256	0.180543
MECR	MECR	-0.00218008	0.0604775
CSDE1	CSDE1	0.00549384	0.1694
TAF13	TAF13	-0.00199179	0.537806
CACUL1	CACUL1	0.00789572	0.00946998
RPL22	RPL22	0.013063	0.0618117
TIMM8B	TIMM8B	0.000492447	0.797053
ZSWIM7	ZSWIM7	-0.00252314	0.24284
C9orf78	C9orf78	-0.00292564	0.491854
MRPL33	MRPL33	0.00223825	0.557137
TRA2B	TRA2B	0.00454676	0.381429
AJAP1	AJAP1	0.000736224	0.891054
PAPSS1	PAPSS1	8.11877e-05	0.984905
RPL3	RPL3	0.0117086	0.155991
NCDN	NCDN	0.003384	0.689414
DNM3	DNM3	-0.0028029	0.510051
BCKDK	BCKDK	-0.0036058	0.00384356
MRPL20	MRPL20	0.0026735	0.298552
PITHD1	PITHD1	-0.00181425	0.588358
ZNF429	ZNF429	0.000538772	0.743702
RPS25	RPS25	0.0117945	0.201293
UCHL1	UCHL1	0.00525149	0.675099
POLR2G	POLR2G	-0.00534261	0.125467
UROS	UROS	0.000383861	0.885703
SRP14	SRP14	0.0110952	0.187874
PEBP1	PEBP1	0.00513803	0.534619
WIPF2	WIPF2	0.00884069	0.0285566
ESD	ESD	-0.0019864	0.449069
PRDX5	PRDX5	-0.00249035	0.572649
ATAD3A	ATAD3A	-0.00205871	0.261218
ENO1	ENO1	-0.00194219	0.66487
CCDC91	CCDC91	0.0113617	0.0781786
RPS13	RPS13	0.00559857	0.549057
BZW1	BZW1	0.00118709	0.80477
ACTG1	ACTG1	0.00117275	0.885505
UQCRB	UQCRB	0.0129897	0.050021
MGST3	MGST3	-0.00127651	0.7671
TOLLIP	TOLLIP	0.0048516	0.0638226
RAB2A	RAB2A	0.0112748	0.0018775
SDHB	SDHB	-0.00273182	0.284264
PSMD4	PSMD4	-0.000852106	0.779071
CYC1	CYC1	-0.0087312	0.0611191
DPF1	DPF1	0.000745835	0.803541
PSMB4	PSMB4	0.0003537	0.922444
BBS4	BBS4	-0.00268167	0.450833
HINT1	HINT1	0.0016326	0.816306
RPS27	RPS27	0.0105491	0.282993
IRF3	IRF3	-0.00335023	0.0613826
PRDX6	PRDX6	0.00146547	0.689069
GRM2	GRM2	0.000252521	0.573454
MRPS14	MRPS14	-0.00175371	0.739624
ANKRD2	ANKRD2	0.00016254	0.859705
RTN1	RTN1	0.016811	0.0202461
CYFIP2	CYFIP2	0.0114804	0.00824846
HSBP1	HSBP1	-0.00257962	0.585506
PSAP	PSAP	0.00206143	0.684134
MAP1LC3B	MAP1LC3B	0.000319167	0.949031
ST6GALNAC4	ST6GALNAC4	-0.00103363	0.0966591
RTP1	RTP1	1.98683e-05	0.947767
DYNC1LI1	DYNC1LI1	0.00108109	0.72767
ARHGAP32	ARHGAP32	0.0131475	0.0944842
SNRPN	SNRPN	-0.00710292	0.159478
SNX10	SNX10	0.00281215	0.437128
HLA-B	HLA-B	-0.000627239	0.937997
TMCC2	TMCC2	-0.00787179	0.234365
NDUFS5	NDUFS5	0.00956331	0.188951
RTL8C	RTL8C	-0.00752939	0.140345
APOE	APOE	0.01754	0.0467391
BROX	BROX	0.000768727	0.880872
TRIR	TRIR	-0.00616034	0.350997
PPA1	PPA1	-0.00550344	0.680982
GPRASP2	GPRASP2	0.00123789	0.444698
SLC29A3	SLC29A3	0.000876631	0.695363
PREPL	PREPL	0.00910563	0.0628392
PDCD2	PDCD2	-0.00225479	0.173593
LIPA	LIPA	-0.0068058	0.21144
CMAS	CMAS	-0.000320448	0.897656
TSC22D1	TSC22D1	0.0167779	0.0113729
CALM1	CALM1	0.0196684	0.042026
SPINT2	SPINT2	-0.00562486	0.488591
NDUFB1	NDUFB1	-0.00145251	0.764865
SH3BGRL3	SH3BGRL3	-0.00561817	0.181315
RPS7	RPS7	0.0107607	0.228469
SPIN3	SPIN3	-0.000378147	0.945941
FSTL5	FSTL5	-0.00273892	0.416722
RAB1A	RAB1A	0.003462	0.312965
FAM204A	FAM204A	0.00135752	0.69301
MEG3	MEG3	0.0270993	0.0475786
CRIP2	CRIP2	-0.000289116	0.917525
SF3B3	SF3B3	0.00423888	0.0491605
PKM	PKM	0.000926299	0.881476
PSMC5	PSMC5	-0.00234258	0.580695
RCN2	RCN2	0.00625467	0.2608
RPS14	RPS14	0.00827329	0.346347
RABAC1	RABAC1	-0.0180102	0.0552756
RPS17	RPS17	-0.0113559	0.118037
SNCA	SNCA	0.00102908	0.903644
NME4	NME4	-0.00246574	0.256843
FBXL16	FBXL16	0.00701437	0.198105
BEX4	BEX4	0.00170129	0.79528
CALM3	CALM3	0.00406322	0.565981
ANXA2	ANXA2	-0.000470964	0.822846
BAIAP3	BAIAP3	-7.92662e-05	0.936783
PPP1R1B	PPP1R1B	-0.000176481	0.951929
ELOB	ELOB	-0.00549434	0.465751
CNTNAP1	CNTNAP1	0.00073044	0.664946
SNN	SNN	0.00142057	0.508977
RPL12	RPL12	0.0107469	0.14199
C16orf45	C16orf45	-0.00162188	0.688676
FOXP4	FOXP4	-5.58453e-06	0.998017
ALDOA	ALDOA	-0.00268408	0.751936
PSRC1	PSRC1	-0.00731937	0.215961
HPCAL1	HPCAL1	0.00331344	0.465169
TRIAP1	TRIAP1	-0.000300331	0.830488
FBXL19	FBXL19	-0.00125314	0.456446
AP2S1	AP2S1	-0.00452502	0.290177
MT1G	MT1G	-0.00399393	0.701255
PAFAH1B1	PAFAH1B1	0.0143374	0.0130794
DGKZ	DGKZ	0.00296207	0.204561
RABEP1	RABEP1	0.00889077	0.0309662
SOX15	SOX15	-0.00261633	0.0502026
SRRM3	SRRM3	0.000794354	0.718216
EIF1	EIF1	0.0038345	0.698765
G6PC3	G6PC3	-0.0043748	0.0188634
NSG2	NSG2	0.00238538	0.669602
NSF	NSF	0.0265152	0.00589221
GAP43	GAP43	0.00654463	0.471338
DDX5	DDX5	0.0255904	0.0107815
KCND2	KCND2	0.0205719	0.0281752
ARPC2	ARPC2	0.00651115	0.0830209
RPL38	RPL38	0.00852861	0.242469
WBP2	WBP2	-0.00649137	0.159699
QKI	QKI	-0.0163889	0.00755798
AC016588.2	AC016588.2	-0.00109908	0.142132
APP	APP	-0.00216442	0.394877
OAZ1	OAZ1	0.00227017	0.795771
RPS4X	RPS4X	0.0138938	0.0897385
RTN4	RTN4	-0.0088354	0.00177306
PPDPF	PPDPF	-0.0188985	0.024184
ARF3	ARF3	-0.000352127	0.937594
THOP1	THOP1	-0.0026491	0.0692152
LGALS3	LGALS3	0.00102879	0.592906
EEF2	EEF2	-0.00244153	0.698096
UBL5	UBL5	0.00146715	0.803031
CLIP2	CLIP2	-0.00573288	0.386556
PIN1	PIN1	-0.00173142	0.700174
RPL13A	RPL13A	0.00920997	0.297981
AL078621.3	AL078621.3	-0.00137844	0.0160282
RPS11	RPS11	0.0115737	0.0485235
EPDR1	EPDR1	-0.0018389	0.385785
ZNF814	ZNF814	-0.00441321	0.0941299
ITGB1BP1	ITGB1BP1	0.00540936	0.24439
GPM6A	GPM6A	0.0387406	0.0154747
VSNL1	VSNL1	0.00488508	0.669875
SLC25A4	SLC25A4	-0.00303151	0.636342
STMN1	STMN1	-0.00227683	0.818375
CALM2	CALM2	0.000613255	0.946921
PIK3R1	PIK3R1	0.0120112	0.00372763
PRKCB	PRKCB	0.0133843	0.084521
OIP5-AS1	OIP5-AS1	0.00679129	0.112008
BCYRN1	BCYRN1	-0.0246264	0.148641
RPS27A	RPS27A	0.0162741	0.0924326
DYSF	DYSF	-0.020318	0.179565
TMSB10	TMSB10	0.00423285	0.656264
MOB1A	MOB1A	0.00125136	0.584238
PNMA6A	PNMA6A	0.000994908	0.312328
IDS	IDS	0.0200015	0.0581295
HS6ST2	HS6ST2	-0.00124854	0.104018
NDUFA1	NDUFA1	-0.000366659	0.939926
FAM199X	FAM199X	0.00706463	0.0599961
TCEAL7	TCEAL7	-0.00318738	0.537956
ARMCX1	ARMCX1	-0.000568871	0.603145
PCSK1N	PCSK1N	0.00719555	0.483759
RPL9P7	RPL9P7	-0.00477774	0.332709
HDHD3	HDHD3	-0.00191578	0.189531
CTSL	CTSL	-0.00766723	0.265551
YWHAZ	YWHAZ	0.0178988	0.0161565
SNX16	SNX16	-0.00112678	0.751582
FABP5	FABP5	0.00824037	0.129981
ATP6V1H	ATP6V1H	0.0126549	0.0108124
AC120036.4	AC120036.4	0.000300639	0.76285
PPP2CB	PPP2CB	0.00211926	0.765487
DPYSL2	DPYSL2	0.000563886	0.80007
AC090114.1	AC090114.1	-0.000918112	0.485642
RUNDC3B	RUNDC3B	0.00102902	0.636525
PCLO	PCLO	0.0170312	0.0533774
CHCHD2	CHCHD2	0.0018406	0.755323
STMN2	STMN2	0.00906497	0.434862
YKT6	YKT6	-0.000255886	0.854309
SOD2	SOD2	0.00413234	0.518184
GTF2H5	GTF2H5	-0.0025148	0.409194
PCMT1	PCMT1	0.00235251	0.496114
LMBRD1	LMBRD1	0.00110876	0.81891
RPL7L1	RPL7L1	0.00187559	0.554367
TUBB2A	TUBB2A	0.00115869	0.88444
CPEB4	CPEB4	0.0118272	0.0723181
ATP6V0E1	ATP6V0E1	0.00116151	0.782813
PDP1	PDP1	0.00155152	0.629314
RPL10P9	RPL10P9	-0.0201408	0.0451481
SLC6A7	SLC6A7	-0.000739699	0.391909
CXCL14	CXCL14	-8.55897e-05	0.97963
UQCRQ	UQCRQ	-0.00676071	0.224791
REEP5	REEP5	-0.00357914	0.465383
AC093591.1	AC093591.1	-0.00483262	0.0660894
GAR1	GAR1	0.000671718	0.525824
FAM47E	FAM47E	0.00101611	0.49054
SEL1L3	SEL1L3	-7.89858e-05	0.942374
SSBP1	SSBP1	0.00973105	0.0292704
LETM1	LETM1	-0.00375228	0.0562097
HES1	HES1	0.000910945	0.427129
NDUFB5	NDUFB5	0.00342906	0.401122
EIF2A	EIF2A	-0.00232561	0.20587
PHACTR1	PHACTR1	0.019076	0.105153
LPP	LPP	0.00654279	0.26179
PODXL2	PODXL2	0.00169233	0.501722
TPRA1	TPRA1	-0.00281368	0.0785031
LSAMP	LSAMP	0.0063937	0.315214
RPL14	RPL14	0.0115588	0.105059
CHL1	CHL1	0.0141322	0.0889361
ZNF483	ZNF483	0.0199898	0.00499933
XRCC6	XRCC6	-0.00141859	0.628113
CSNK1E	CSNK1E	-0.013024	9.75539e-05
LGALS1	LGALS1	-0.00353793	0.291305
TIMP3	TIMP3	0.00282407	0.0653323
DRG1	DRG1	0.00120717	0.699353
NOL4L	NOL4L	-0.0116027	0.010091
FTH1P10	FTH1P10	-0.0371779	0.0135002
MTERF4	MTERF4	0.00263842	0.0390272
COPS9	COPS9	0.000851583	0.905715
PTMA	PTMA	-0.00136421	0.847453
SP100	SP100	-0.00943901	0.408814
SERPINE2	SERPINE2	0.00270823	0.46102
C2orf69	C2orf69	-0.00153371	0.659853
HIBCH	HIBCH	0.0112969	0.360862
KIF5C	KIF5C	0.0053961	0.480155
CCDC115	CCDC115	-0.00169643	0.305404
RPL31	RPL31	0.00683032	0.423509
MGAT4A	MGAT4A	0.00916841	0.0100073
COX5B	COX5B	-0.00237415	0.768027
BCAP31	BCAP31	-0.00412607	0.15955
RPL13AP25	RPL13AP25	-0.0195068	0.0298355
HCN1	HCN1	0.00159699	0.487262
NUDT4	NUDT4	0.00257007	0.489276
TIMM13	TIMM13	-0.00264761	0.484775
LGMN	LGMN	-0.00115996	0.526096
HIKESHI	HIKESHI	0.00168412	0.606856
GRIA3	GRIA3	0.0115092	0.0231073
SYT17	SYT17	0.00346775	0.0257685
STARD3	STARD3	-0.00377567	0.0312967
MTCH1	MTCH1	0.00486897	0.530905
PAPOLG	PAPOLG	-0.00101684	0.764794
AP003170.4	AP003170.4	-0.00150104	0.0716998
EMC9	EMC9	-0.00100332	0.372148
TUFM	TUFM	-0.00831073	0.218365
VBP1	VBP1	9.40994e-05	0.979179
PSMB5	PSMB5	-0.00710329	0.144142
SBNO1	SBNO1	0.00203642	0.731211
AC064799.1	AC064799.1	-0.0175391	0.0436661
HIP1R	HIP1R	-0.00257242	0.699478
CHPT1	CHPT1	-0.00285312	0.600985
POLR2D	POLR2D	0.000595005	0.831431
DNAJC4	DNAJC4	-0.00126326	0.268551
AL118558.4	AL118558.4	-0.000816442	0.178231
GLRX5	GLRX5	-0.00176876	0.544171
UBE2B	UBE2B	0.00766932	0.417143
AL035071.1	AL035071.1	-0.00331352	0.140582
B4GALNT1	B4GALNT1	-0.000244031	0.86528
RPS29	RPS29	0.00632932	0.405025
KIF5A	KIF5A	0.009985	0.224186
HCFC1	HCFC1	-0.00123123	0.559629
RPL21	RPL21	0.0138493	0.123413
KLRG1	KLRG1	4.99728e-05	0.987159
PIANP	PIANP	0.00115907	0.524861
NDUFS4	NDUFS4	0.00811259	0.181147
ZFP28	ZFP28	-0.000336379	0.81644
NRGN	NRGN	0.00554474	0.677437
CCDC82	CCDC82	0.0128267	0.0101254
GMFB	GMFB	0.00404003	0.196562
DYNLRB1	DYNLRB1	-0.000524181	0.906504
HNRNPC	HNRNPC	0.0111753	0.0411313
AC113935.1	AC113935.1	-0.00844237	0.352659
HSPA8	HSPA8	0.0018251	0.871571
SCAF1	SCAF1	-0.00274362	0.160626
RAD54L2	RAD54L2	0.00763762	0.150817
EPHX1	EPHX1	-0.0110993	0.00884564
ISCU	ISCU	-0.00025628	0.945949
C2CD2L	C2CD2L	-0.00181218	0.223567
BRSK1	BRSK1	-0.000863681	0.848289
NSG1	NSG1	-0.000437726	0.761001
VAMP2	VAMP2	-0.0173237	0.0415919
TPM3	TPM3	0.00890785	0.0115481
GSTM3	GSTM3	-0.000130639	0.955315
SLIT1	SLIT1	0.00254256	0.166688
EIF1B	EIF1B	0.00725915	0.214233
TTC3	TTC3	0.0188184	0.00527998
RPL18	RPL18	0.00255462	0.758243
CCT3	CCT3	-0.00123154	0.901456
CSNK2B	CSNK2B	-0.0106647	0.0321478
ASPHD1	ASPHD1	0.000457743	0.91228
PCSK2	PCSK2	0.00216681	0.424116
ZNF271P	ZNF271P	-0.00117618	0.837532
HIGD1A	HIGD1A	-0.00267347	0.317701
NDUFB8	NDUFB8	-0.0144979	0.0508807
TIPIN	TIPIN	-0.00265653	0.121161
AFG3L2	AFG3L2	0.00490219	0.189636
RPL9	RPL9	0.01612	0.0275196
CRYAB	CRYAB	-0.0104604	0.507867
NDUFS2	NDUFS2	-0.00563614	0.328521
SARAF	SARAF	-0.00253097	0.725107
MORF4L1	MORF4L1	0.00479258	0.280301
S100A6	S100A6	-0.0071211	0.585973
RPL13AP5	RPL13AP5	-0.0155597	0.0119016
AC024293.1	AC024293.1	-0.0154324	0.026043
CCK	CCK	0.00192292	0.832009
YAF2	YAF2	0.00492174	0.223349
USP14	USP14	0.00790784	0.018856
ERI3	ERI3	0.00533324	0.219291
RSU1	RSU1	4.97706e-05	0.991124
SARS	SARS	0.00161103	0.580294
RPS21	RPS21	0.00354284	0.718021
AKR1A1	AKR1A1	-0.00279243	0.219725
APH1A	APH1A	-0.00361523	0.148347
CDC5L	CDC5L	0.00840933	0.00741489
PMVK	PMVK	0.00103662	0.785778
ATP6V0B	ATP6V0B	-0.00704993	0.369652
SNX7	SNX7	-0.000874633	0.577443
ERCC1	ERCC1	0.000166943	0.942042
RSL1D1	RSL1D1	-0.000549734	0.85728
ARFIP2	ARFIP2	-0.00312835	0.0527406
OSCP1	OSCP1	-0.00248233	0.107143
PGAM1	PGAM1	-0.00051026	0.907803
HSPA9	HSPA9	0.00424488	0.621023
TOP2B	TOP2B	0.00576824	0.0537774
RTN4R	RTN4R	0.000375469	0.675766
PPP1R12A	PPP1R12A	0.0128871	0.0142401
OPTN	OPTN	-0.00131587	0.768559
ADCK1	ADCK1	-0.00412093	0.307761
CKB	CKB	0.0036243	0.727425
PHKG2	PHKG2	-0.00329419	0.0173451
TOMM20	TOMM20	0.00850277	0.0928538
PRAF2	PRAF2	-0.00726583	0.00477665
HK1	HK1	0.00146707	0.512731
TRUB1	TRUB1	0.00147514	0.381833
TALDO1	TALDO1	-0.00755541	0.262877
LAMA4	LAMA4	0.00041902	0.753779
CDC42SE2	CDC42SE2	0.000263634	0.955361
SUPT16H	SUPT16H	0.00256088	0.452028
MRPL32	MRPL32	-0.000123858	0.965492
SAP18	SAP18	0.00353282	0.514045
VDAC2	VDAC2	0.00313063	0.499876
SPCS1	SPCS1	-0.0033967	0.606614
RPS24	RPS24	0.0178413	0.026982
PACSIN2	PACSIN2	0.00128828	0.54845
AARS	AARS	-0.00124616	0.772927
CCDC186	CCDC186	0.00184872	0.245114
TIGD5	TIGD5	0.00016255	0.803294
GREM2	GREM2	-0.00333042	0.00175257
BORCS8	BORCS8	-0.000553441	0.684471
CHGA	CHGA	-0.000486058	0.901364
SLC7A8	SLC7A8	0.000218261	0.816722
GTF2A2	GTF2A2	-0.00311999	0.434467
AC245140.2	AC245140.2	-7.70639e-05	0.872629
SCRN1	SCRN1	0.00828765	0.0874813
PHF21A	PHF21A	0.00666492	0.263605
OTUB1	OTUB1	-0.00701467	0.0198428
BORCS7	BORCS7	-0.00657359	0.0577479
SYNGR1	SYNGR1	-0.00385149	0.155148
RPS15A	RPS15A	-0.00905952	0.264427
NUS1	NUS1	0.000320926	0.877918
LMAN2	LMAN2	-0.00374402	0.0820111
CA10	CA10	0.00425295	0.101739
GNAS	GNAS	0.0137715	0.147979
SCAMP5	SCAMP5	0.00199216	0.689538
KIF1A	KIF1A	0.00586844	0.340813
NR2F6	NR2F6	-0.0024292	0.123445
RPL28	RPL28	-0.00221479	0.769829
NME3	NME3	0.00407668	0.456598
RPS2	RPS2	0.00809025	0.3465
SYNGR3	SYNGR3	0.00244838	0.28279
ZNF385A	ZNF385A	-7.3505e-05	0.938132
METTL9	METTL9	0.00467839	0.115955
MCOLN1	MCOLN1	-0.000629639	0.684075
TSC1	TSC1	0.000624256	0.889938
TERF2IP	TERF2IP	0.00611674	0.167874
ACTR2	ACTR2	0.00418315	0.322982
NLRP1	NLRP1	0.00515118	0.199427
PFN1	PFN1	-0.0148833	0.0603459
FAM49A	FAM49A	0.00467799	0.223346
C1QBP	C1QBP	0.00148182	0.5935
LDLR	LDLR	-0.0163734	0.0626152
Z74021.1	Z74021.1	-0.00231815	0.174432
TXNDC17	TXNDC17	-0.000670258	0.747828
KRT10	KRT10	-0.00274075	0.675507
ZFP82	ZFP82	-0.00354701	0.0960104
TUBG1	TUBG1	-0.000783475	0.330944
SUV39H1	SUV39H1	-0.00179958	0.0282036
CACYBP	CACYBP	0.00453146	0.733536
PRMT1	PRMT1	-0.00545392	0.191036
HDAC5	HDAC5	-0.00451131	0.222629
TCEAL5	TCEAL5	0.00197567	0.535471
SEC62	SEC62	0.0036835	0.549494
MYDGF	MYDGF	-0.00422358	0.174793
NAA10	NAA10	-0.00442804	0.166545
FXYD6	FXYD6	-0.00402504	0.346281
ZNF470	ZNF470	-0.000867754	0.738924
GAS7	GAS7	0.00122808	0.9093
METTL23	METTL23	-0.00423695	0.069442
ITM2B	ITM2B	0.00364298	0.584298
CES4A	CES4A	-0.00653219	0.28296
IER3IP1	IER3IP1	-0.00212562	0.12502
RPL10	RPL10	0.00973234	0.353045
GCA	GCA	0.000158965	0.970224
ST8SIA3	ST8SIA3	0.00344633	0.45144
ABHD17A	ABHD17A	-0.00674829	0.102183
CHML	CHML	-0.000350893	0.733325
LSM7	LSM7	-0.00183482	0.636557
RPL36	RPL36	0.000790707	0.926041
DYRK1A	DYRK1A	0.0122323	0.0226111
ILF3-AS1	ILF3-AS1	-0.00400161	0.412309
ASNA1	ASNA1	-0.00458331	0.0741354
HSDL1	HSDL1	0.00134328	0.392207
IER2	IER2	0.000299778	0.880923
VSTM2B	VSTM2B	-0.0125024	0.0324946
COX7A2L	COX7A2L	0.00502481	0.0803644
C19orf53	C19orf53	-0.00268362	0.53759
TECR	TECR	-0.00811833	0.23037
DDA1	DDA1	-0.00139997	0.485152
RPL18A	RPL18A	0.00551556	0.575425
SYMPK	SYMPK	0.00270829	0.184061
TMEM59L	TMEM59L	-0.0034604	0.517354
TRIM37	TRIM37	0.00660617	0.0222036
PPP1R37	PPP1R37	-0.000538207	0.542459
ANKMY2	ANKMY2	0.00249145	0.297907
PNMA8A	PNMA8A	0.000678302	0.840361
PNMA8C	PNMA8C	-0.000103703	0.953506
TMEM160	TMEM160	-0.0006063	0.891997
FTL	FTL	0.00244522	0.826138
C2orf68	C2orf68	-0.0236313	0.0218305
SIK3	SIK3	-0.00747413	0.178969
SLC17A7	SLC17A7	0.00729412	0.333202
GTF2I	GTF2I	0.00434195	0.391766
KLK7	KLK7	0.000142545	0.852797
TAPBP	TAPBP	-0.00103034	0.647299
PEA15	PEA15	-0.00526658	0.535194
COX4I1	COX4I1	0.00250919	0.750468
SUPT7L	SUPT7L	0.000973281	0.541967
RPL9P9	RPL9P9	-0.0142913	0.0534745
URI1	URI1	0.00982885	0.0620502
C1D	C1D	0.00356845	0.149041
WASH6P	WASH6P	-0.0116699	0.00164123
RPL39	RPL39	0.0066922	0.37316
COX7B	COX7B	0.00418603	0.358312
SYN1	SYN1	0.00700833	0.32653
SLC25A6	SLC25A6	-0.000542977	0.888575
ASB6	ASB6	-0.0038159	0.0240952
FRRS1L	FRRS1L	0.00647426	0.262219
DIRAS2	DIRAS2	0.000508471	0.873302
RORB	RORB	-0.00856383	0.0657832
WASHC1	WASHC1	-0.0048288	0.174493
ENY2	ENY2	0.00184655	0.646844
PLGRKT	PLGRKT	0.0013808	0.817118
NEFM	NEFM	0.00643082	0.316451
RHEB	RHEB	0.00602312	0.127505
FAM3C	FAM3C	0.00481023	0.152657
RPS3AP26	RPS3AP26	-0.00333751	0.0490105
RPS3AP25	RPS3AP25	-0.00542981	0.0764064
BEX3	BEX3	0.00300048	0.697119
APTR	APTR	-0.00327798	0.139887
C7orf50	C7orf50	0.00554325	0.0973251
PRKAR1B	PRKAR1B	0.00147148	0.775818
C6orf203	C6orf203	0.000486588	0.718784
HMGN3	HMGN3	-0.00241296	0.689929
BEND6	BEND6	-0.00112461	0.712526
CUTA	CUTA	-0.0107355	0.107718
QRSL1	QRSL1	-0.00161986	0.520118
MCUR1	MCUR1	-0.00109976	0.666469
LYRM4	LYRM4	0.000698751	0.854428
ECI2	ECI2	0.00165132	0.363615
AC140125.2	AC140125.2	-0.000349686	0.638249
PDLIM7	PDLIM7	-0.00103206	0.16342
KIAA1191	KIAA1191	0.00108655	0.458311
AC139491.1	AC139491.1	-0.00117931	0.338805
LNPEP	LNPEP	0.00504213	0.0747913
KIF2A	KIF2A	0.00271461	0.37785
MAP9	MAP9	0.00227183	0.515215
RPS3A	RPS3A	0.00220126	0.811879
CCNI	CCNI	0.00196373	0.751696
PGRMC1	PGRMC1	-0.00494882	0.522206
TMEM165	TMEM165	-0.00999876	0.0904101
OPA1	OPA1	0.00641695	0.245181
PFN2	PFN2	0.00118927	0.719589
ATP1B3	ATP1B3	0.00240418	0.814283
ZCCHC10	ZCCHC10	-0.000290012	0.89867
COX17	COX17	-0.00248389	0.553435
ZNF786	ZNF786	-0.000490129	0.718914
PSMD6	PSMD6	-0.000616378	0.768144
SEC13	SEC13	-0.00431854	0.0605135
BRK1	BRK1	-0.00543126	0.189225
CRELD1	CRELD1	-0.00540539	0.185526
MLC1	MLC1	0.000852752	0.667301
CD99L2	CD99L2	0.00206431	0.728986
SNU13	SNU13	0.00100806	0.818585
UQCR10	UQCR10	0.00292954	0.624299
XBP1	XBP1	-0.00069637	0.761938
S100B	S100B	0.00552333	0.54107
PIGP	PIGP	-0.000946126	0.659764
SLC13A3	SLC13A3	-0.0100478	0.365471
RBM39	RBM39	0.0117016	0.00314716
MAP1LC3A	MAP1LC3A	0.00112878	0.801204
CST3	CST3	0.00383263	0.698809
MORF4L2	MORF4L2	0.00674102	0.403894
COPS7B	COPS7B	-0.00250003	0.483713
SRI	SRI	0.000574173	0.841131
PPP2R2C	PPP2R2C	0.00668831	0.451419
MZT2A	MZT2A	-0.00428441	0.319317
HSPE1	HSPE1	0.00500342	0.710963
MZT2B	MZT2B	-0.00122348	0.764777
RMND5A	RMND5A	-0.0122049	0.0987301
PPP3R1	PPP3R1	0.00107029	0.712748
MAPKAPK5-AS1	MAPKAPK5-AS1	-0.00297315	0.270935
ATP2B1-AS1	ATP2B1-AS1	-0.000399517	0.685806
SEZ6L2	SEZ6L2	-0.00210069	0.706647
RND1	RND1	-0.00115504	0.270738
RPL41	RPL41	0.0118154	0.274356
IGSF21	IGSF21	0.00400388	0.0831523
MAGEH1	MAGEH1	-0.00386725	0.382663
RPL5	RPL5	0.00831891	0.242463
SYT10	SYT10	-0.000704031	0.124624
ST13	ST13	0.0106093	0.383458
EVL	EVL	0.00569317	0.109879
SECISBP2L	SECISBP2L	-0.00440172	0.273016
ENO2	ENO2	-0.000836097	0.869915
AC215219.1	AC215219.1	-0.0154336	0.000155982
APLP2	APLP2	0.00410769	0.637417
MAOB	MAOB	0.00296706	0.454169
RPA3	RPA3	-0.000144364	0.926584
THY1	THY1	0.00044166	0.954175
ISY1	ISY1	-0.00242702	0.0498953
ATP1B1	ATP1B1	-0.00906038	0.322991
WIPF3	WIPF3	0.00105341	0.72508
CHORDC1	CHORDC1	0.00256182	0.899381
HACD3	HACD3	0.00262894	0.404273
COA5	COA5	0.00431563	0.0850857
PLEKHB1	PLEKHB1	-0.0209769	0.00517584
TMEM147	TMEM147	-0.00733383	0.064065
PEX16	PEX16	-0.003688	0.104184
GSTP1	GSTP1	-0.00921756	0.224115
AQP4	AQP4	0.0128596	0.124773
BDNF	BDNF	-0.000348656	0.439884
2022-09-04	2022-09-04	-0.0215764	0.0161864
AC116533.1	AC116533.1	-0.0129668	0.0320005
PSMB7	PSMB7	0.00436487	0.17511
PPCS	PPCS	-0.000655029	0.679469
ATP6V0D1	ATP6V0D1	-0.00150274	0.570563
SYT1	SYT1	0.0400872	0.0326888
DCAF10	DCAF10	-0.00237596	0.0650336
DKK3	DKK3	0.00586	0.439192
NUDC	NUDC	0.00119023	0.862291
EIF4A2	EIF4A2	0.00485647	0.556171
RPLP2	RPLP2	0.00216098	0.781208
CEND1	CEND1	-0.00217399	0.654141
INPP4A	INPP4A	0.0027536	0.385234
PRPSAP2	PRPSAP2	-0.0023325	0.522052
TRMT112	TRMT112	-0.00899965	0.152695
ADPRHL2	ADPRHL2	-0.00196692	0.406486
RPL34	RPL34	0.0129185	0.185681
PLGLB1	PLGLB1	-0.00324338	0.153183
SSU72	SSU72	0.00288851	0.377415
SLC2A11	SLC2A11	-0.00216747	0.143848
CHCHD5	CHCHD5	-0.00133	0.327894
PSMB2	PSMB2	0.00061346	0.867072
SLU7	SLU7	0.000233637	0.944923
NCSTN	NCSTN	-0.00903247	0.00431955
KIDINS220	KIDINS220	0.00500866	0.206672
CHD4	CHD4	0.00398509	0.249339
CCNY	CCNY	0.00893364	0.121061
TBR1	TBR1	1.47239e-05	0.991027
SVBP	SVBP	-0.00112851	0.540319
SMIM20	SMIM20	-0.0017231	0.396124
RPLP1	RPLP1	0.0114123	0.254477
GTF2IP12	GTF2IP12	-0.000744386	0.836945
DENND6B	DENND6B	-0.000733938	0.176631
NCL	NCL	0.0129568	0.0383689
WASH2P	WASH2P	-0.0108879	0.00556704
MTFR1L	MTFR1L	0.000524203	0.65651
NT5DC1	NT5DC1	-0.00357924	0.453391
COL9A3	COL9A3	-0.00613405	0.357503
PSMA4	PSMA4	-0.00207935	0.497059
NACA	NACA	0.0174179	0.0172891
C4orf48	C4orf48	-0.0146048	0.0797966
TYROBP	TYROBP	0.00143893	0.311285
SEC31A	SEC31A	0.00344007	0.189661
PLEKHB2	PLEKHB2	0.00118463	0.604656
RPL29	RPL29	0.00593854	0.455905
GALNT18	GALNT18	0.00201148	0.566504
ANAPC11	ANAPC11	-0.000906331	0.866054
PHACTR3	PHACTR3	0.000938983	0.8686
ATP9A	ATP9A	0.0139056	0.120206
RPS3	RPS3	0.00239005	0.77304
WASH7P	WASH7P	-0.0157238	0.00029255
GPN2	GPN2	-0.000672703	0.665732
GUK1	GUK1	0.0007863	0.910563
LDHA	LDHA	-0.000159037	0.957562
NEDD4L	NEDD4L	0.0196224	0.0540367
ACOT7	ACOT7	-0.0008641	0.81802
CLSTN1	CLSTN1	0.00504606	0.163858
ATP1A2	ATP1A2	0.010209	0.137362
PRKACB	PRKACB	0.0011496	0.776707
VPS26B	VPS26B	-0.000315203	0.902582
RGS7	RGS7	0.0190283	0.0229458
DDX20	DDX20	0.000439424	0.571394
POMP	POMP	0.00557848	0.123822
MRPL12	MRPL12	-0.00308254	0.126803
STK25	STK25	-0.00304576	0.225875
PPAN	PPAN	-0.00137621	0.133963
SYT11	SYT11	0.000471838	0.92285
MACROD2	MACROD2	0.0221775	0.0300968
TIMM10B	TIMM10B	0.00238111	0.226361
CA11	CA11	0.00216026	0.567651
COX6C	COX6C	0.00306839	0.670334
AL445433.1	AL445433.1	-0.000212136	0.530013
C1orf61	C1orf61	0.00209279	0.670462
LGALS8	LGALS8	-0.00229115	0.108924
RAN	RAN	0.000315955	0.960981
MFN2	MFN2	0.00129928	0.394525
PCDH9	PCDH9	-0.0238098	0.00127256
LINGO1	LINGO1	-0.0261894	0.146159
CREM	CREM	-0.000509049	0.724077
KCNJ6	KCNJ6	0.0020493	0.493665
EIF4G3	EIF4G3	0.00452591	0.350758
ARF1	ARF1	-0.0029557	0.395437
RPL24	RPL24	0.0192497	0.0171298
HPCA	HPCA	-0.000574915	0.892024
CIRBP	CIRBP	0.00918505	0.40653
MYO10	MYO10	0.00109027	0.79479
MDH1	MDH1	0.000613574	0.923836
HMGB1	HMGB1	0.011886	0.106491
C6orf106	C6orf106	0.00116311	0.496995
FO538757.1	FO538757.1	-0.00405565	0.291309
GDI1	GDI1	-0.00621346	0.273942
SLAIN1	SLAIN1	-0.00320563	0.541304
SLITRK5	SLITRK5	-0.00691975	0.10533
CDC16	CDC16	0.00105976	0.711205
CAMK2B	CAMK2B	0.00306043	0.641731
ASCC1	ASCC1	-0.00309691	0.290411
NDRG2	NDRG2	-0.0142694	0.0827932
EAPP	EAPP	-0.000124779	0.961384
RPL36AL	RPL36AL	0.0084902	0.237038
RAB15	RAB15	2.05779e-05	0.990927
GPI	GPI	0.00364517	0.606661
SMARCD3	SMARCD3	-0.00283406	0.195894
PCNX1	PCNX1	0.0113218	0.0153205
CABP1	CABP1	0.00328721	0.515981
FASN	FASN	-0.00558787	0.104937
SLC48A1	SLC48A1	-0.0134504	0.273604
APBA2	APBA2	-0.00323531	0.59939
RAB11A	RAB11A	-0.00264996	0.19672
GOLGA8A	GOLGA8A	0.00464377	0.390895
SRSF8	SRSF8	-0.00218197	0.432755
MAP1A	MAP1A	0.00862499	0.45926
PCBP2	PCBP2	-0.000204475	0.942844
SERF2	SERF2	-0.00961496	0.353972
NBR1	NBR1	-0.000866892	0.683044
SCG3	SCG3	0.00374946	0.604419
SLC8A1-AS1	SLC8A1-AS1	-0.00283541	0.0572659
RTL10	RTL10	9.29666e-05	0.937849
ARPP19	ARPP19	0.00734497	0.286808
RNF135	RNF135	-0.00225708	0.0113534
COX5A	COX5A	-0.00434756	0.366945
MBTPS1	MBTPS1	0.00964712	0.000503591
TSPAN3	TSPAN3	-0.00129492	0.723405
SH3GL3	SH3GL3	-0.00397632	0.417867
OCIAD1	OCIAD1	0.00562479	0.166493
MESP1	MESP1	0.00079592	0.520162
SEC14L1	SEC14L1	0.00897177	0.0129687
SFT2D1	SFT2D1	-0.00297581	0.55819
HCFC1R1	HCFC1R1	-0.00764144	0.0806092
EIF1AX	EIF1AX	-0.000415833	0.916868
HES6	HES6	-0.00543365	0.207513
TCF25	TCF25	0.0157053	0.0166331
YPEL3	YPEL3	-0.0112293	0.17206
NDUFAF2	NDUFAF2	0.00980082	0.00607269
ATP1B2	ATP1B2	0.0101537	0.0413003
HNRNPL	HNRNPL	-0.0299752	0.0141186
COPRS	COPRS	-0.000452603	0.909054
UROD	UROD	-0.00154686	0.382025
DHX36	DHX36	0.00999039	0.015579
KRT222	KRT222	-0.000348536	0.592388
PSMD8	PSMD8	-0.000715953	0.870794
USP39	USP39	-0.000835429	0.765988
IFIT1	IFIT1	-0.00260537	0.294599
ADAM11	ADAM11	-0.000219602	0.843829
RAB40B	RAB40B	0.00135686	0.785142
CHCHD10	CHCHD10	-0.00270263	0.541887
TBCB	TBCB	-0.0138175	0.0759556
CTXN1	CTXN1	0.00439691	0.452913
MRPL34	MRPL34	-0.0014648	0.663798
AC074033.1	AC074033.1	-0.000427766	0.488734
U2AF1L4	U2AF1L4	-0.00090451	0.725268
NUMBL	NUMBL	-0.000333969	0.826619
ATP1A3	ATP1A3	0.0024572	0.640613
SNRPD2	SNRPD2	-0.00392109	0.329884
MCRS1	MCRS1	-0.00416758	0.0407453
HS6ST3	HS6ST3	0.0170278	0.0211256
ATP6V1D	ATP6V1D	-0.000893549	0.806081
FAM213A	FAM213A	0.00324121	0.472938
TFPT	TFPT	-0.00328197	0.124199
GHITM	GHITM	-3.26403e-05	0.993099
SMARCB1	SMARCB1	0.000624124	0.82847
DTNB	DTNB	0.0065263	0.341734
FUNDC2	FUNDC2	-0.000488974	0.869504
LINC01278	LINC01278	0.00789094	0.15801
ATP6AP2	ATP6AP2	-0.00170858	0.631972
GPM6B	GPM6B	-0.0165412	0.00992769
TMEM141	TMEM141	-0.0016913	0.556988
OLFM1	OLFM1	0.010522	0.270199
RPL7A	RPL7A	0.00901541	0.243836
TUSC1	TUSC1	-0.00487137	0.0957297
ZNF7	ZNF7	-0.00407902	0.0954504
BAALC	BAALC	0.00084882	0.911347
C8orf37	C8orf37	-0.000416972	0.347051
C8orf59	C8orf59	-8.18346e-05	0.988931
RPL7	RPL7	0.00874597	0.359301
PSD3	PSD3	0.0180193	0.0217214
MICU3	MICU3	0.00843638	0.119754
NDUFB2	NDUFB2	0.000924688	0.874271
AKR1B1	AKR1B1	-0.00592907	0.0793417
ZC3HC1	ZC3HC1	0.000274148	0.884734
PSIP1	PSIP1	0.00419872	0.310718
VGF	VGF	-0.000838975	0.846131
PPP1R9A	PPP1R9A	0.0157852	0.0126789
LIMK1	LIMK1	-0.00233074	0.095923
2022-09-07	2022-09-07	-0.00631602	0.156273
RPL21P75	RPL21P75	-0.0053485	0.140322
PHF14	PHF14	0.00910544	0.0414219
SASH1	SASH1	0.000354219	0.943758
CDC40	CDC40	0.00870949	0.0312012
MAP3K7	MAP3K7	0.00422976	0.0747647
FIS1	FIS1	-0.00113319	0.86728
TBCC	TBCC	-0.00311217	0.157018
RUFY1	RUFY1	-0.000966117	0.782098
PJA2	PJA2	0.0148942	0.0155055
COX7C	COX7C	0.00727652	0.339439
SKAP2	SKAP2	-0.000965884	0.74375
RPL37	RPL37	0.0153761	0.0323139
SPARCL1	SPARCL1	0.0234314	0.157862
HOPX	HOPX	0.00363907	0.567725
PAICS	PAICS	-0.00293668	0.170217
SST	SST	0.00475484	0.397344
ZBTB38	ZBTB38	0.00757661	0.122284
C3orf18	C3orf18	-0.000259344	0.696399
HMGB1P5	HMGB1P5	-0.0150917	0.00429821
RBMX	RBMX	0.00664738	0.0611378
INPP5J	INPP5J	-0.00017912	0.681862
UFD1	UFD1	-0.00160738	0.643747
SH3BGR	SH3BGR	0.000790545	0.90801
CSE1L	CSE1L	0.00142706	0.732879
YWHAB	YWHAB	0.00151037	0.831671
COMMD7	COMMD7	-0.00212411	0.383538
ABHD12	ABHD12	0.000608537	0.816494
PAK5	PAK5	0.00283421	0.549571
ILKAP	ILKAP	0.00550868	0.0907848
C2orf80	C2orf80	0.000353744	0.838176
FAM171B	FAM171B	0.00499531	0.528595
DHFR2	DHFR2	-0.00627076	0.0303873
HSP90AA2P	HSP90AA2P	-0.00959625	0.0909258
PPP2R5E	PPP2R5E	0.00570097	0.021377
CCM2	CCM2	0.00731838	0.357066
RAB27B	RAB27B	0.00157087	0.320347
TRAPPC6B	TRAPPC6B	0.00478791	0.0242362
ERH	ERH	0.00163376	0.733521
AC016739.1	AC016739.1	-0.0117852	0.0181223
RSRC2	RSRC2	0.00849954	0.0997944
ST6GALNAC5	ST6GALNAC5	0.00722025	0.0174298
UNC80	UNC80	0.00705587	0.0637573
KCNG1	KCNG1	0.000572479	0.456499
KCTD10	KCTD10	-0.00112582	0.333844
COX6B1	COX6B1	-0.00314628	0.569681
STMN3	STMN3	-0.000571603	0.876173
DAAM1	DAAM1	0.00146162	0.806614
LINC01821	LINC01821	-0.00024539	0.532249
TUBA1A	TUBA1A	-0.00430509	0.658067
RPL13AP20	RPL13AP20	-0.00117052	0.057804
ZFYVE21	ZFYVE21	-0.00287004	0.316012
CPNE9	CPNE9	-0.000830094	0.606845
MFSD6	MFSD6	-0.00257781	0.657745
PRKCA	PRKCA	0.0169539	0.0777064
CCNQ	CCNQ	-0.00296661	0.702928
SMAP1	SMAP1	0.00722855	0.124949
GABARAPL1	GABARAPL1	0.00130743	0.65045
SPRYD7	SPRYD7	-0.00171081	0.574213
CIR1	CIR1	0.00603513	0.228798
PGM2L1	PGM2L1	0.00416164	0.441354
MRPS21	MRPS21	0.000900504	0.777979
CPNE4	CPNE4	-0.00223491	0.53907
PRR13	PRR13	-0.00317364	0.24379
OXCT1	OXCT1	0.00258234	0.427885
CHP1	CHP1	-0.00618769	0.15194
NAP1L1	NAP1L1	0.0154858	0.00383743
FKBP2	FKBP2	-0.00314845	0.637768
CDC123	CDC123	0.00160512	0.433144
SELENOH	SELENOH	-0.00289103	0.111336
TMCO1	TMCO1	-0.000589263	0.857283
TMED2	TMED2	-0.00235507	0.5368
PAK1	PAK1	0.00339328	0.653622
SLC7A10	SLC7A10	-0.000346059	0.529421
WAC-AS1	WAC-AS1	-0.000151272	0.963756
MRPS36	MRPS36	-0.000821811	0.836662
SLC1A2	SLC1A2	0.0264248	0.0330778
POGZ	POGZ	0.00602723	0.115403
RPL15	RPL15	0.00983726	0.232843
CAPN1	CAPN1	-0.00290466	0.0659885
RGS4	RGS4	0.00283621	0.573263
NUDCD3	NUDCD3	0.0131279	0.00410445
JAZF1	JAZF1	0.00673346	0.331489
PHPT1	PHPT1	-0.00308198	0.435908
THAP6	THAP6	0.00226228	0.389885
LAMTOR5	LAMTOR5	-0.00365951	0.406663
CNPY3	CNPY3	-0.000900351	0.47089
PVALB	PVALB	-0.00119725	0.189521
FAS	FAS	0.00112916	0.0322984
INPPL1	INPPL1	0.00054993	0.68057
AK5	AK5	-0.00449754	0.609616
CCND2	CCND2	0.00413595	0.122568
ATP1A1	ATP1A1	0.000768191	0.887509
HAX1	HAX1	-0.00265731	0.38401
CAMSAP2	CAMSAP2	0.014927	0.0433421
DNAJC5	DNAJC5	0.00203174	0.607471
PTGES2	PTGES2	-0.00104554	0.518221
NDUFAF5	NDUFAF5	0.00215355	0.310271
NAXE	NAXE	-0.00630183	0.100601
SNRPD1	SNRPD1	0.00387098	0.284663
SH3D19	SH3D19	-0.00325936	0.528184
KDM1A	KDM1A	0.00057794	0.683099
MED9	MED9	-0.00159344	0.220564
BAP1	BAP1	0.00146715	0.604392
KIF5B	KIF5B	0.00981558	0.0847276
CAMTA1	CAMTA1	0.013656	0.0234923
FBXO33	FBXO33	-0.000253285	0.92349
ARHGEF2	ARHGEF2	-0.0100343	0.0525335
SERBP1	SERBP1	0.00460262	0.35519
LAPTM4A	LAPTM4A	0.000967711	0.7822
B4GAT1	B4GAT1	-0.00491475	0.251954
PREX1	PREX1	0.00239706	0.739897
MBOAT2	MBOAT2	0.00592737	0.4608
EIF2B3	EIF2B3	0.000562206	0.839979
MARK1	MARK1	0.0100329	0.0971375
TMEM242	TMEM242	-0.000542955	0.824138
GDF10	GDF10	0.000137802	0.720381
GRIN2B	GRIN2B	0.0145241	0.0807317
MAPK1	MAPK1	0.0167216	0.00851459
SRCIN1	SRCIN1	-0.0171789	0.0354826
CUEDC2	CUEDC2	-0.00542786	0.130094
CTSD	CTSD	-0.0145713	0.0121822
MEAF6	MEAF6	0.00228345	0.405866
CDC42BPA	CDC42BPA	0.00160648	0.733432
RPL13	RPL13	0.0107967	0.238712
UBE2D4	UBE2D4	-0.00121063	0.570505
EIF5A	EIF5A	-0.00812731	0.131586
HNRNPU	HNRNPU	0.0109875	0.125172
KLC1	KLC1	0.00355536	0.447566
PLIN3	PLIN3	-0.00937318	0.045402
COQ10B	COQ10B	0.000729671	0.768851
NUDT14	NUDT14	-0.000881567	0.515795
ST8SIA1	ST8SIA1	-0.00071477	0.828228
COPS2	COPS2	0.0103801	0.0223618
RPL30	RPL30	-0.00234736	0.768557
TLK1	TLK1	0.00822999	0.173093
GNA15	GNA15	-0.000182253	0.690373
FIBP	FIBP	-1.35098e-05	0.996465
RNASEH1	RNASEH1	0.00102972	0.392222
NOP53	NOP53	-0.00442494	0.233328
B2M	B2M	0.00605035	0.673044
HERC1	HERC1	0.0170253	0.000923317
MAP2	MAP2	0.0363897	0.0214698
DERL2	DERL2	0.00117778	0.654951
KCTD13	KCTD13	-0.000427037	0.808781
UBL7	UBL7	-0.00293018	0.0200371
IRF2BP1	IRF2BP1	-0.00600668	0.0238716
C9orf16	C9orf16	0.000561115	0.882769
NARFL	NARFL	-0.00264828	0.182983
KEAP1	KEAP1	-0.00610262	0.128719
MYL12B	MYL12B	0.000214495	0.957045
UBALD1	UBALD1	-0.0064754	0.0088274
TBRG1	TBRG1	-0.00135968	0.725985
UQCRC2	UQCRC2	0.00330534	0.0781752
PHKB	PHKB	0.0111255	0.0260226
SPIRE2	SPIRE2	-0.000191284	0.920983
C17orf100	C17orf100	-0.000288294	0.563563
HLF	HLF	0.003401	0.308963
TEX2	TEX2	0.00389964	0.314722
SCRG1	SCRG1	-0.0038692	0.5225
NRBP1	NRBP1	0.000292186	0.917037
OAZ2	OAZ2	-0.00725076	0.100672
SNAI2	SNAI2	-0.000102477	0.746215
CYCS	CYCS	0.00201003	0.63652
TNRC6C	TNRC6C	0.00330516	0.405802
RPL6P27	RPL6P27	-0.0147484	0.0114569
PCYT2	PCYT2	-0.00762129	0.0231002
TFG	TFG	0.00104449	0.594217
ZNF446	ZNF446	4.59191e-06	0.99675
STX1B	STX1B	0.000979551	0.745284
RPS15	RPS15	0.00388185	0.693574
NDUFA3	NDUFA3	-0.00493073	0.421354
ELP6	ELP6	-0.000212217	0.947597
GRHPR	GRHPR	-0.00859606	0.146276
PHYHIP	PHYHIP	0.00462115	0.600721
DHPS	DHPS	-0.00343315	0.205594
MED29	MED29	-0.0025137	0.427734
RPS19	RPS19	0.00655762	0.461841
DBP	DBP	-0.00113378	0.411881
RPS9	RPS9	0.00745618	0.317665
PIH1D1	PIH1D1	-0.00454069	0.0691467
TMEM18	TMEM18	-0.00143992	0.641218
AKAP12	AKAP12	0.00792508	0.0908035
SYNJ2BP	SYNJ2BP	-0.00281679	0.208714
CFDP1	CFDP1	0.00734022	0.0553901
LARP1	LARP1	0.00299112	0.530959
PPP1R21	PPP1R21	-0.00384328	0.441819
CFAP36	CFAP36	0.00831869	0.00577867
CHCHD6	CHCHD6	0.00240094	0.444198
MRPL4	MRPL4	-0.00418131	0.0578093
PDHA1	PDHA1	0.00122433	0.683597
PRPF4	PRPF4	0.00220213	0.136791
TMEM246	TMEM246	-0.00130281	0.60761
CBWD5	CBWD5	-0.00481307	0.131563
TTC39B	TTC39B	-0.00257775	0.279218
TUBB4B	TUBB4B	-0.00132856	0.62787
SMIM19	SMIM19	-0.00128332	0.602157
IGBP1	IGBP1	-0.00258321	0.311309
FBXO25	FBXO25	0.00414798	0.207497
ACHE	ACHE	-0.000546018	0.600563
COL26A1	COL26A1	-0.00514925	0.00731304
GTPBP10	GTPBP10	0.00164732	0.483028
CROT	CROT	-0.00345018	0.059378
CACNA2D1	CACNA2D1	0.000529577	0.922566
DNAJC30	DNAJC30	-0.000633107	0.688605
HDDC2	HDDC2	0.000579231	0.791717
FUT9	FUT9	0.0114023	0.164728
COX7A2	COX7A2	-0.00332822	0.591669
ENPP4	ENPP4	-0.00617182	0.145084
KLHDC3	KLHDC3	-0.00657408	0.0715094
OARD1	OARD1	0.00014864	0.936429
PHF20L1	PHF20L1	0.0125004	0.00308266
TTC1	TTC1	-0.00558049	0.488345
AC008608.2	AC008608.2	0.000936433	0.0209836
SKP1	SKP1	0.00533546	0.383955
MCTP1	MCTP1	0.00757928	0.0457971
IFT22	IFT22	-0.000888821	0.457038
NDUFA5	NDUFA5	0.00453931	0.357318
MSL3	MSL3	0.00137399	0.252483
NDUFS6	NDUFS6	0.00199864	0.633715
FRG1	FRG1	-0.00292233	0.509255
HSPA4L	HSPA4L	0.00424766	0.829376
SOBP	SOBP	0.00111536	0.864969
AC004057.1	AC004057.1	-0.00642424	0.0410931
PPA2	PPA2	0.00532953	0.293081
PLPP6	PLPP6	-0.000762116	0.248753
PPP3CA	PPP3CA	0.0110082	0.0804497
TSC22D3	TSC22D3	-0.0115299	0.0423785
UBE2K	UBE2K	0.0148192	0.00236276
LDB2	LDB2	-0.00222316	0.575316
AC093323.1	AC093323.1	-0.000218033	0.818105
VLDLR	VLDLR	-0.00631703	0.0127787
TAGLN3	TAGLN3	0.00303627	0.646276
CBWD3	CBWD3	-0.0054035	0.294395
FAM107A	FAM107A	0.010223	0.154361
CAMKV	CAMKV	-0.000409984	0.917967
INIP	INIP	0.00124148	0.669833
GPX1	GPX1	-0.000496544	0.889347
RUFY3	RUFY3	0.010843	0.0936945
FBXL2	FBXL2	0.00329536	0.102274
USF3	USF3	-0.00142325	0.68916
RANBP1	RANBP1	-0.0038487	0.36473
SUMO3	SUMO3	0.000578241	0.844072
C21orf33	C21orf33	-0.00262267	0.570302
CHMP4B	CHMP4B	-0.000521529	0.86603
CRNKL1	CRNKL1	0.00313141	0.348113
SNAP25	SNAP25	0.0127011	0.44505
MRPS26	MRPS26	-0.00143601	0.747315
TRIP12	TRIP12	0.013379	0.000598012
RPL10P6	RPL10P6	-0.000522037	0.320461
SRPK2	SRPK2	-0.000948881	0.754214
C4orf3	C4orf3	-0.00126131	0.695094
ACOT13	ACOT13	-0.00101905	0.701909
EBPL	EBPL	-0.000140351	0.940965
APLP1	APLP1	-0.0347434	0.00152753
BRD3	BRD3	0.000546334	0.839621
KATNAL1	KATNAL1	-0.000555925	0.896474
RPS2P5	RPS2P5	-0.00283594	0.119221
CRYM	CRYM	-0.000565368	0.81267
AKT1S1	AKT1S1	-0.00593462	0.0668846
ROGDI	ROGDI	-0.00944893	0.0494246
NAB2	NAB2	-0.00157577	0.199124
JPT1	JPT1	-0.00131426	0.516696
SPRYD3	SPRYD3	0.000602944	0.765288
OBSL1	OBSL1	0.00185068	0.45623
PSMC4	PSMC4	-0.00216288	0.47581
PTMS	PTMS	0.00278113	0.657334
KCTD6	KCTD6	0.00170766	0.730311
HPCAL4	HPCAL4	0.00520409	0.249257
LONRF2	LONRF2	0.0116477	0.0521367
PAK3	PAK3	0.00919622	0.071688
NTM	NTM	0.00522129	0.6084
GGNBP2	GGNBP2	0.00060631	0.836337
ARRDC2	ARRDC2	-0.0145378	0.0688624
LPCAT4	LPCAT4	-0.00175541	0.348555
PAFAH1B2	PAFAH1B2	-0.00456087	0.143827
PEX11B	PEX11B	-0.000588809	0.821957
AAMDC	AAMDC	-0.00570304	0.0399475
PARK7	PARK7	0.00113321	0.858911
IDH3B	IDH3B	-0.00363262	0.143427
TMEM9	TMEM9	-0.00465003	0.0504876
PTPN11	PTPN11	0.0141135	0.00202903
PTPN20	PTPN20	-0.000796871	0.351423
S100A13	S100A13	-0.00246149	0.632252
NAPRT	NAPRT	-0.00172293	0.0681206
DICER1	DICER1	-0.00109474	0.844095
PCDH17	PCDH17	-0.000965007	0.795622
MAGI2-AS3	MAGI2-AS3	-0.00365677	0.517054
DANCR	DANCR	-0.00525528	0.443441
RPL26	RPL26	-0.0171812	0.163587
RAB18	RAB18	0.00103946	0.647142
RPS26	RPS26	-0.0149708	0.134854
M6PR	M6PR	0.00124704	0.503104
RAB3A	RAB3A	-0.00428734	0.32474
ODF2L	ODF2L	0.00565471	0.173103
FNDC10	FNDC10	-0.000192363	0.709933
MALSU1	MALSU1	0.0018952	0.605195
RPL3P4	RPL3P4	-0.0203983	0.015652
TM7SF2	TM7SF2	-0.0031833	0.326718
SH2D3C	SH2D3C	-0.000695284	0.163629
B3GNT4	B3GNT4	-0.000120371	0.716079
2022-03-02	2022-03-02	-0.000441351	0.535219
SLC22A17	SLC22A17	-0.00501706	0.39453
FJX1	FJX1	0.000164153	0.762613
CCP110	CCP110	-0.00704616	0.423907
TMEM74B	TMEM74B	-0.00021517	0.831185
CBWD1	CBWD1	-0.00122771	0.780495
CADM3	CADM3	0.00205371	0.444929
TUBB	TUBB	-0.000742281	0.852616
POLR2L	POLR2L	-0.00645461	0.140876
NDUFB9	NDUFB9	-0.00470732	0.352864
TMEM258	TMEM258	-0.0104195	0.222545
OTUD6B-AS1	OTUD6B-AS1	0.00395771	0.428788
TMEM54	TMEM54	-0.00228231	0.27393
SPIN1	SPIN1	0.0134305	0.0433499
ANO6	ANO6	-0.00464663	0.0569054
LYRM1	LYRM1	0.00123994	0.413875
SCCPDH	SCCPDH	-0.0012844	0.771315
VPS35	VPS35	-0.000906051	0.783068
TTC19	TTC19	0.0126261	0.00177362
ECE1	ECE1	-0.0029147	0.691124
CCDC85B	CCDC85B	0.00411362	0.521762
PDCD5	PDCD5	0.00176643	0.622261
C1QTNF4	C1QTNF4	-0.000498414	0.896121
SNCG	SNCG	-0.00269256	0.541025
MAST3	MAST3	0.000859854	0.886208
MED4	MED4	-0.00121895	0.535084
ACSL1	ACSL1	-0.0113381	0.100147
HIVEP1	HIVEP1	-0.00144818	0.68214
CEP170B	CEP170B	0.00126985	0.602071
SUMO1	SUMO1	8.60325e-05	0.982085
SCN1B	SCN1B	-0.00105453	0.814592
CCDC88B	CCDC88B	-0.000100614	0.921295
ACTR6	ACTR6	-0.000279748	0.915615
LY6H	LY6H	0.00446475	0.45608
ATN1	ATN1	0.000652907	0.825367
SLC6A17	SLC6A17	0.000263319	0.91774
MALAT1	MALAT1	-0.0141021	0.0303411
HP1BP3	HP1BP3	0.00162258	0.844945
B3GAT3	B3GAT3	-0.00154417	0.685489
COPE	COPE	-0.00783199	0.198658
DAD1	DAD1	-0.00610694	0.456102
EIF5	EIF5	0.0117475	0.227655
NARS	NARS	0.00450645	0.326645
RPS28	RPS28	-0.000108282	0.992157
BABAM2	BABAM2	0.0125535	0.25632
FEZ1	FEZ1	-0.00445208	0.41679
UBA52	UBA52	0.0056721	0.424399
GNAO1	GNAO1	-0.00337054	0.649418
OSBPL8	OSBPL8	0.0166397	0.0103434
COPS3	COPS3	-0.000714794	0.833164
RPL23A	RPL23A	-0.0225614	0.0510983
MAP2K6	MAP2K6	-0.000114307	0.980281
KPTN	KPTN	-0.00298637	0.123174
SRM	SRM	-0.00370486	0.0757105
DYNLL2	DYNLL2	-0.00102389	0.824347
SV2B	SV2B	0.000869633	0.920451
CLASP1	CLASP1	0.0127402	0.039368
CAMK2A	CAMK2A	0.0161405	0.0930502
MRPL13	MRPL13	-0.000428027	0.838634
ANKRD12	ANKRD12	0.00684867	0.347449
MLLT1	MLLT1	0.00351541	0.208818
ARL8B	ARL8B	0.00880453	0.0136237
MAGED4B	MAGED4B	-0.0040331	0.0851606
MAPRE3	MAPRE3	0.00230606	0.442365
MAGED4	MAGED4	-0.00287527	0.237132
LINC00599	LINC00599	-0.00130556	0.618394
CBWD2	CBWD2	9.93933e-05	0.982457
SBDS	SBDS	0.00256771	0.624186
WBP4	WBP4	-0.000367182	0.852292
ILF3	ILF3	0.00687977	0.02619
BABAM1	BABAM1	-0.001199	0.635202
AC021016.2	AC021016.2	-0.000323233	0.384508
PTCHD4	PTCHD4	0.000177439	0.743164
JUND	JUND	-0.0120129	0.142436
GCC2	GCC2	0.0112888	0.00874936
UQCRFS1	UQCRFS1	-0.00172059	0.694693
FAM105A	FAM105A	0.0017894	0.0449907
PPP5C	PPP5C	0.00024443	0.909916
FGD4	FGD4	0.0112552	0.0623024
ZNF76	ZNF76	-0.00148861	0.485454
FAM216A	FAM216A	-0.00347588	0.152395
BCL11A	BCL11A	-0.00263983	0.462567
TEX261	TEX261	-0.00342876	0.124688
NUAK1	NUAK1	-0.00543994	0.41049
ANKRD39	ANKRD39	-0.0027213	0.109641
MRPS9	MRPS9	0.000413306	0.84676
CCDC74A	CCDC74A	-0.000540643	0.275997
RNF181	RNF181	-0.0012989	0.706224
CCDC74B	CCDC74B	-0.000235351	0.52508
ZNF275	ZNF275	0.00111974	0.379793
ENOX2	ENOX2	0.00436505	0.689064
NKAP	NKAP	-0.00122493	0.508083
FRMPD4	FRMPD4	0.0126336	0.033245
NPDC1	NPDC1	-0.0018922	0.674107
NCS1	NCS1	0.00747511	0.103084
ST6GALNAC6	ST6GALNAC6	-0.00125871	0.142515
CDK9	CDK9	-0.00131373	0.314145
SH3GL2	SH3GL2	0.00635806	0.124801
ARFGEF1	ARFGEF1	0.00728573	0.0164063
UBE2V2	UBE2V2	0.00812717	0.0517202
STMN4	STMN4	-0.0235687	0.168822
POLR2J3	POLR2J3	-0.0103873	0.0527304
TMEM130	TMEM130	0.00340622	0.508726
EIF4H	EIF4H	0.00790101	0.0852711
LINC00957	LINC00957	-0.00229503	0.0183711
EEPD1	EEPD1	-0.0144228	0.139816
TMEM106B	TMEM106B	0.00129884	0.728709
FSCN1	FSCN1	-0.0150859	0.0421817
SH3BGRL2	SH3BGRL2	0.00317684	0.330783
AARS2	AARS2	-0.00100359	0.0286589
MEA1	MEA1	-0.00227969	0.250452
DNPH1	DNPH1	-0.000765974	0.649466
GLO1	GLO1	-0.00124797	0.648304
HLA-A	HLA-A	0.00634401	0.47292
TIGD6	TIGD6	-0.00042402	0.699784
ETF1	ETF1	0.00385229	0.248343
TXNDC15	TXNDC15	0.00874357	0.197092
PAM	PAM	0.0059613	0.10604
CCNH	CCNH	0.000960041	0.768059
SCOC	SCOC	0.00107909	0.834487
SEC24D	SEC24D	-0.000747868	0.731125
PCDH10	PCDH10	0.00554044	0.238811
GRINA	GRINA	-0.00605855	0.0333896
FGF12	FGF12	0.024533	0.0123608
GRSF1	GRSF1	0.00148223	0.593242
SEC61A1	SEC61A1	-0.00311827	0.398357
MTRNR2L12	MTRNR2L12	0.0126535	0.320065
PRPS1	PRPS1	-0.00685762	0.000196787
RNF7	RNF7	0.00233226	0.377055
RHOA	RHOA	-0.0063262	0.186621
NDUFA6	NDUFA6	0.00066802	0.810792
BPHL	BPHL	0.000371684	0.862918
NCAM2	NCAM2	-0.0157429	0.0412843
TPD52L2	TPD52L2	0.00106552	0.663511
PTPRT	PTPRT	0.00271901	0.426464
HSPA5	HSPA5	0.000404304	0.948719
MMP24OS	MMP24OS	-0.0037222	0.099812
PRNP	PRNP	-0.00164172	0.829127
METTL5	METTL5	0.00306261	0.118714
VDAC3	VDAC3	-0.00146658	0.736642
CHAMP1	CHAMP1	0.0008668	0.812779
RGCC	RGCC	-0.00989593	0.401472
MVK	MVK	-0.00371194	0.475096
CKAP4	CKAP4	-0.00173528	0.31921
NDUFA12	NDUFA12	0.000345183	0.939962
CNTN5	CNTN5	0.00942283	0.0540508
KDM1B	KDM1B	0.00294688	0.321931
KPNA4	KPNA4	0.0029576	0.453962
EIF2S1	EIF2S1	0.000646802	0.835427
CNTN1	CNTN1	0.022319	0.0964606
PCF11	PCF11	0.00536868	0.141432
METAP2	METAP2	0.00408117	0.25559
MCRIP1	MCRIP1	-0.00413857	0.226136
MLF2	MLF2	-0.00505295	0.370485
AP2B1	AP2B1	0.0112852	0.0187441
SPCS2	SPCS2	0.00772891	0.153554
PAN2	PAN2	-0.00201931	0.585676
STX5	STX5	-0.00597045	0.0444079
IMPDH2	IMPDH2	-0.0049822	0.0918403
PARL	PARL	-0.0018713	0.255579
UBA1	UBA1	-0.000380692	0.945919
MTCO1P12	MTCO1P12	0.00195948	0.533024
NECAB1	NECAB1	-0.00279727	0.681989
SCG2	SCG2	0.0039977	0.528684
TMEM59	TMEM59	-0.00439103	0.363087
ATP6V1E1	ATP6V1E1	0.000230036	0.953951
PSPC1	PSPC1	0.00786141	0.131
GNRHR2	GNRHR2	-0.00315053	0.0160874
TM9SF2	TM9SF2	0.00242296	0.384034
CETN2	CETN2	0.000810793	0.596236
RNF187	RNF187	-0.00387152	0.368738
LYST	LYST	0.00753495	0.117038
ARPC3	ARPC3	-0.00166464	0.77376
TMBIM6	TMBIM6	-0.0128448	0.04499
GANAB	GANAB	-0.00330077	0.106304
ENC1	ENC1	0.00692997	0.41986
GRAMD1B	GRAMD1B	0.00460031	0.0286458
TTC9B	TTC9B	0.000398006	0.897471
CASC4	CASC4	0.00373975	0.613101
LRRC8B	LRRC8B	0.00371092	0.617761
PRPF19	PRPF19	-0.00103054	0.68121
MAPT	MAPT	-0.00655699	0.476324
LMO7	LMO7	0.00144031	0.531646
RRP15	RRP15	-0.00107697	0.722083
CDK5	CDK5	0.000190253	0.915057
NTPCR	NTPCR	-0.00328604	0.0411054
ADAR	ADAR	0.0100338	0.0156632
UNC119B	UNC119B	-0.00134131	0.0817275
CDK14	CDK14	0.00608057	0.158034
GABRD	GABRD	0.000188627	0.897139
ARHGDIG	ARHGDIG	0.00272596	0.54074
LRP8	LRP8	0.000472707	0.65225
CBX7	CBX7	9.52304e-05	0.979795
BTBD2	BTBD2	-0.00124904	0.675941
RABIF	RABIF	-0.00200621	0.265955
CTNNB1	CTNNB1	-0.010172	0.0460692
WAC	WAC	0.00874886	0.0468365
DSTN	DSTN	0.00694191	0.225839
MIEN1	MIEN1	-0.00721606	0.221795
TMEM132A	TMEM132A	-0.00044385	0.783483
CHI3L1	CHI3L1	-0.000516195	0.95841
MAP2K4	MAP2K4	0.00583195	0.593601
FKBP8	FKBP8	-0.0131236	0.0299468
RFPL1S	RFPL1S	0.00113775	0.595614
NOLC1	NOLC1	-0.00137171	0.651142
PIK3R3	PIK3R3	0.000735577	0.132728
MRPL16	MRPL16	-0.000519214	0.813707
PTOV1	PTOV1	-0.0188032	0.00813778
RAP1GAP2	RAP1GAP2	0.000244123	0.904494
RPL21P28	RPL21P28	-0.00484031	0.097642
HNRNPA1	HNRNPA1	0.000441582	0.892057
AMPH	AMPH	0.00554371	0.170051
TNIP1	TNIP1	-0.000353813	0.805978
MXI1	MXI1	-0.00446155	0.238682
MTND2P28	MTND2P28	0.000934344	0.817801
KCTD21	KCTD21	0.000394691	0.632422
WASHC2A	WASHC2A	-0.00055776	0.80703
REPS2	REPS2	0.0111985	0.190726
FBXO34	FBXO34	0.00684695	0.185888
GSTO1	GSTO1	-0.0012714	0.712909
CBX6	CBX6	-0.0100776	0.0648901
DNAJC6	DNAJC6	-0.00304069	0.540513
EIF4G2	EIF4G2	0.0058913	0.477955
TCAF1	TCAF1	0.00304852	0.370946
ITPK1	ITPK1	-0.00954369	0.0880452
SLC35F1	SLC35F1	0.00117665	0.697248
DDX24	DDX24	0.0158376	0.0136763
NAV3	NAV3	0.0355712	0.00314169
WARS	WARS	0.000561775	0.772571
EID1	EID1	0.00309895	0.683426
MYO5A	MYO5A	0.0141901	0.0180656
ALDOC	ALDOC	-0.00501639	0.332497
KCNMA1	KCNMA1	0.0305695	0.0102109
NDUFAB1	NDUFAB1	0.00272156	0.574111
RPS27AP16	RPS27AP16	-0.0113967	0.0366988
FAM96B	FAM96B	-0.00355068	0.550931
PHLPP2	PHLPP2	0.00145891	0.479456
KARS	KARS	-0.00254439	0.157578
CMC2	CMC2	-0.000852904	0.857719
AC135782.1	AC135782.1	-0.000343053	0.541069
RPL23	RPL23	0.0102324	0.0395489
ELP5	ELP5	-0.00346905	0.057121
ARHGAP27	ARHGAP27	0.000201927	0.881979
RAD51C	RAD51C	-0.000438586	0.868959
ADAMTS10	ADAMTS10	0.000577544	0.535512
ETS2	ETS2	0.00323011	0.0675384
CYB561	CYB561	0.000507692	0.431735
NFRKB	NFRKB	-0.00210624	0.288899
EIF2AK2	EIF2AK2	0.00322054	0.494163
SRP68	SRP68	-0.00127386	0.670503
TCF4	TCF4	-0.00176026	0.582043
GPR150	GPR150	0.000253805	0.49039
FAM81A	FAM81A	-0.00209603	0.437195
SYT4	SYT4	0.00343443	0.447362
DOK6	DOK6	0.00501434	0.09821
SMU1	SMU1	0.00591014	0.272089
BSG	BSG	-0.0102183	0.0586337
PIK3CB	PIK3CB	0.00878922	0.105315
MAP2K2	MAP2K2	-0.0050016	0.0403412
STARD3NL	STARD3NL	-0.00094288	0.606092
SLC2A3	SLC2A3	0.00207654	0.465225
GTF2F1	GTF2F1	0.00295774	0.101061
CPLX1	CPLX1	9.46573e-05	0.974291
ERC2	ERC2	0.00102788	0.895884
MRPS7	MRPS7	-0.00169345	0.583974
AC010615.2	AC010615.2	-0.00172401	0.541072
SRSF10	SRSF10	0.00826954	0.200463
ZNF540	ZNF540	0.00400512	0.0163205
SIRT2	SIRT2	-0.0180117	0.0103569
RPS16	RPS16	0.00498727	0.553366
PRPF31	PRPF31	-0.0026452	0.413585
EPHB6	EPHB6	-0.000167988	0.96531
ADD3	ADD3	0.00960034	0.140184
GLT1D1	GLT1D1	-0.000795547	0.505912
EPN1	EPN1	-0.00329521	0.229915
YWHAQ	YWHAQ	-0.00416164	0.30908
DYRK4	DYRK4	-0.00215967	0.135054
ATRAID	ATRAID	-0.0055987	0.130719
TOMM7	TOMM7	0.00977439	0.134909
ACTR1B	ACTR1B	-0.00360392	0.237905
CXorf40B	CXorf40B	-0.000583175	0.548954
BEX5	BEX5	0.000277425	0.931081
SYP	SYP	0.000533227	0.922819
PORCN	PORCN	-0.000971778	0.323919
UXT	UXT	-0.00130966	0.690827
NDUFB11	NDUFB11	-0.00791329	0.149801
RGN	RGN	-0.00223264	0.487928
CXorf40A	CXorf40A	-0.00201041	0.260904
SET	SET	-0.00557864	0.415057
DNM1	DNM1	0.00803863	0.395746
STXBP1	STXBP1	0.00588046	0.308894
GNAQ	GNAQ	0.00901416	0.0899541
ELAVL2	ELAVL2	0.00168328	0.47456
RAD21	RAD21	4.05741e-05	0.995804
ZNF706	ZNF706	0.000671963	0.89762
PEX2	PEX2	-4.10588e-05	0.987329
ASPH	ASPH	0.0122932	0.0138923
XIAP	XIAP	0.00236003	0.390481
BAG4	BAG4	0.0024152	0.328028
TRIM35	TRIM35	-0.00325106	0.209533
TUSC3	TUSC3	0.00261007	0.130589
AP1S1	AP1S1	-0.00180907	0.530081
PEG10	PEG10	0.00638005	0.290589
HSPB1	HSPB1	0.00934051	0.702575
MLXIPL	MLXIPL	-0.00397087	0.0295204
TSPAN13	TSPAN13	0.000416977	0.785995
SRSF3	SRSF3	0.00125883	0.866448
GNL1	GNL1	0.00103604	0.629506
ATXN1	ATXN1	0.000599036	0.907166
RPL15P3	RPL15P3	-0.00980032	0.0162541
SPOCK1	SPOCK1	-0.00541548	0.379222
PLK2	PLK2	0.00188127	0.409619
ARHGAP10	ARHGAP10	0.000250148	0.7507
CCDC126	CCDC126	-0.00266327	0.585993
LIMCH1	LIMCH1	-0.00767133	0.108785
RGS12	RGS12	0.000809504	0.791272
RNF168	RNF168	0.00393481	0.153668
GYG1	GYG1	-0.00211561	0.377304
NEK11	NEK11	0.00328886	0.239838
TUSC2	TUSC2	-0.0014083	0.538983
UQCRC1	UQCRC1	-0.00707458	0.019028
SELENOM	SELENOM	-0.00619253	0.372289
PES1	PES1	-0.00152536	0.400986
MAPK8IP2	MAPK8IP2	0.00423929	0.371409
HSPA13	HSPA13	0.00218253	0.370868
NBDY	NBDY	0.00235699	0.73501
ZNF449	ZNF449	0.00130119	0.45557
RPL24P8	RPL24P8	-0.00303407	0.0649107
SLC12A5	SLC12A5	0.000302875	0.925602
SLC23A2	SLC23A2	0.00777899	0.173971
CHPF	CHPF	-0.00296098	0.0420705
PNKD	PNKD	-0.00233413	0.507038
SLC39A10	SLC39A10	0.00465142	0.264841
HCG18	HCG18	0.00318158	0.528715
DBI	DBI	-0.00158453	0.849046
EIF5B	EIF5B	0.0102184	0.0179376
DCTN1	DCTN1	0.00137837	0.706551
RPH3A	RPH3A	-0.00143759	0.533376
TTTY15	TTTY15	-0.00276397	0.487724
HECTD4	HECTD4	0.0125314	0.0413226
THAP2	THAP2	-0.00148256	0.704583
HSF1	HSF1	-0.00257447	0.256311
DZIP1	DZIP1	0.00244253	0.204581
VMO1	VMO1	-0.000665142	0.194469
USP5	USP5	-0.00346636	0.060079
JTB	JTB	-0.00766535	0.28186
TM9SF3	TM9SF3	0.00712873	0.0438961
PDCD5P1	PDCD5P1	-0.000219113	0.4958
B3GAT1	B3GAT1	0.0006258	0.921886
PSMB1	PSMB1	0.00178526	0.69475
PTGES3	PTGES3	0.00528418	0.76763
SCAF11	SCAF11	0.00427152	0.429428
SF3B5	SF3B5	-0.00184762	0.585938
MRPL51	MRPL51	0.0040859	0.366673
EXOC1	EXOC1	-0.00162905	0.679526
WASF3	WASF3	0.00741346	0.0492555
GLUL	GLUL	-0.000445214	0.947467
ALDH9A1	ALDH9A1	-0.00158126	0.529962
B3GALNT1	B3GALNT1	0.00116623	0.151381
TGOLN2	TGOLN2	0.00318442	0.445419
PUS3	PUS3	-0.00104101	0.60305
BANF1	BANF1	-0.00745786	0.289124
CROCCP2	CROCCP2	-0.00638045	0.079109
RAE1	RAE1	-0.00129638	0.45222
RPL27A	RPL27A	0.0142984	0.0265856
ABCB8	ABCB8	0.00075464	0.524262
PLPP3	PLPP3	-0.000510149	0.929461
FABP3	FABP3	-0.00364034	0.056871
MARCKSL1	MARCKSL1	-0.022509	0.134226
NAA60	NAA60	-0.0029246	0.13352
FBXW7	FBXW7	0.00836468	0.0599388
ACTR8	ACTR8	0.00192948	0.375363
WRAP73	WRAP73	-0.00153315	0.369702
CMPK1	CMPK1	0.00124169	0.784327
CCNL2	CCNL2	0.00764233	0.14712
IDI1	IDI1	-0.00695315	0.127002
RITA1	RITA1	-0.00166434	0.0353588
FBXL15	FBXL15	-0.00134608	0.538534
C9orf116	C9orf116	-0.000109801	0.880731
PRDX3	PRDX3	-0.00287843	0.240736
MKL2	MKL2	0.00975274	0.115325
SSRP1	SSRP1	-0.00121947	0.571748
HES4	HES4	-0.000848252	0.68235
MAPK3	MAPK3	-0.00289561	0.310864
NECTIN2	NECTIN2	-0.00225866	0.0045899
KSR2	KSR2	0.00274834	0.279429
ANAPC5	ANAPC5	-0.00441758	0.27727
GREM1	GREM1	-0.0203641	0.00916725
FAT3	FAT3	0.00455414	0.292017
POMGNT2	POMGNT2	-0.00132514	0.350916
S100A1	S100A1	-0.0132633	0.054788
PLPPR4	PLPPR4	0.00643032	0.100067
PTP4A2	PTP4A2	-0.00425022	0.504007
ANAPC10	ANAPC10	0.00519311	0.168667
NR1H2	NR1H2	-0.00302763	0.218757
TMEM121	TMEM121	-0.00178771	0.221573
AC008026.1	AC008026.1	-0.0022625	0.206189
PSMC3	PSMC3	-0.00287816	0.338459
GSK3B	GSK3B	0.0128792	0.0123994
TTLL7	TTLL7	-0.0179519	0.0209867
PEMT	PEMT	-0.00137618	0.33386
PLCB1	PLCB1	0.0305881	0.00825501
C1orf174	C1orf174	-0.00555285	0.0334415
SIK2	SIK2	0.00264058	0.564346
FAUP1	FAUP1	-0.0041676	0.154207
TMEM126B	TMEM126B	0.00228451	0.520133
NASP	NASP	0.0012133	0.826459
GPBP1L1	GPBP1L1	0.00224	0.480306
ARL5B	ARL5B	0.00120994	0.539302
RASGEF1A	RASGEF1A	0.00251033	0.0755402
NSMCE4A	NSMCE4A	0.00189522	0.433284
YWHAE	YWHAE	0.00241106	0.602007
NCOR1	NCOR1	0.0150378	0.000328843
TSEN15	TSEN15	-0.00504877	0.354964
CHID1	CHID1	-0.00454507	0.0150835
SLC25A3	SLC25A3	0.000831962	0.864489
MT1E	MT1E	0.0047175	0.541563
LAMTOR1	LAMTOR1	-0.00769564	0.133651
NRAS	NRAS	-0.000842714	0.495444
MLST8	MLST8	-0.000926298	0.411534
PSME2	PSME2	-0.000112821	0.935837
PALM	PALM	0.00294055	0.403159
COX8A	COX8A	-0.00570463	0.162088
SUCLA2	SUCLA2	0.00808842	0.102406
FAM192A	FAM192A	0.00434103	0.0993724
RNF41	RNF41	-0.00156595	0.56142
PEG3	PEG3	0.00434474	0.525567
DNAJC3	DNAJC3	0.0011259	0.793089
RING1	RING1	-0.00511142	0.151144
KPNA2	KPNA2	-0.000962594	0.615422
AHSA1	AHSA1	-0.000623207	0.963237
PSME2P2	PSME2P2	-0.000521027	0.19631
BBS2	BBS2	0.00542889	0.30566
TMEM50A	TMEM50A	-0.00206903	0.556025
ETFA	ETFA	-0.00332464	0.490761
EMC10	EMC10	-0.000341299	0.973627
FAM173A	FAM173A	0.000635719	0.852117
FLYWCH1	FLYWCH1	0.00323206	0.489021
MBIP	MBIP	0.000252359	0.913861
HIRIP3	HIRIP3	-0.00202148	0.309019
ATG16L2	ATG16L2	-0.00709826	0.0825862
NDRG4	NDRG4	0.00195458	0.721858
SGTA	SGTA	-0.00125945	0.78104
LAMTOR4	LAMTOR4	-0.00539193	0.276433
PELI3	PELI3	-0.000424605	0.609248
BAD	BAD	-0.00583063	0.08282
ZFP90	ZFP90	0.00662229	0.0283556
BLOC1S1	BLOC1S1	-0.0104665	0.0558979
CDK5R1	CDK5R1	0.0028952	0.420124
SAT2	SAT2	-0.000994483	0.88055
SLC1A4	SLC1A4	0.00202037	0.285192
GPALPP1	GPALPP1	-0.00102654	0.589071
TVP23C	TVP23C	-0.00275137	0.310206
NFIB	NFIB	-0.00337896	0.512536
ODC1	ODC1	-7.43055e-05	0.950752
TVP23B	TVP23B	-3.62859e-05	0.98715
EPN2	EPN2	0.00140953	0.795732
XPC	XPC	-0.00127263	0.651115
PTGES3L	PTGES3L	-0.000489788	0.304926
MED1	MED1	-0.00191721	0.338285
RPS13P2	RPS13P2	-0.00061136	0.306224
ID2	ID2	0.00182742	0.55965
DUSP1	DUSP1	-0.00173508	0.523297
PIAS4	PIAS4	-0.0105175	0.000282128
ZNF426	ZNF426	-0.002141	0.251041
PRDX2	PRDX2	-0.00406394	0.501587
PRKACA	PRKACA	0.000424016	0.843634
2022-03-06	2022-03-06	0.0059294	0.260975
SMDT1	SMDT1	0.0039598	0.290358
RAB11FIP5	RAB11FIP5	-0.00243671	0.0275927
FBXO27	FBXO27	0.000751899	0.779952
SLITRK4	SLITRK4	0.00161408	0.548258
MAGEE2	MAGEE2	-6.56541e-05	0.831705
USP11	USP11	0.00437793	0.402107
CLCN4	CLCN4	-0.00677567	0.370196
SLC27A4	SLC27A4	-0.00961493	0.00434056
RAD23B	RAD23B	0.00510639	0.00737349
SHC3	SHC3	0.00537001	0.0925864
VCP	VCP	-0.000503445	0.896152
CHMP5	CHMP5	-0.00028853	0.924175
RRAGA	RRAGA	-0.00628102	0.194416
FDFT1	FDFT1	-0.0136635	0.156291
LUC7L2	LUC7L2	0.000135924	0.980319
EXOC4	EXOC4	0.0101503	0.0517849
CBLL1	CBLL1	-0.00038547	0.898274
CHN2	CHN2	-0.00558552	0.0179782
ARL4A	ARL4A	0.00125456	0.817105
ADAP1	ADAP1	-0.00937817	0.0203425
HCG11	HCG11	1.32758e-05	0.989387
CAP2	CAP2	-0.000389168	0.919984
GMDS	GMDS	0.0013928	0.679846
GABRG2	GABRG2	0.00150081	0.748642
TMEM161B	TMEM161B	0.00613758	0.0436423
TRIM23	TRIM23	0.00422556	0.154024
RPL26P19	RPL26P19	-0.00425746	0.655542
RPS27AP11	RPS27AP11	-0.00417218	0.102824
NCBP2	NCBP2	0.000579738	0.831444
PSMD2	PSMD2	-0.0032612	0.162027
TMSB4XP4	TMSB4XP4	-0.00675986	0.00282179
MCCC1	MCCC1	0.00195858	0.592034
TBL1XR1	TBL1XR1	0.0105281	0.0188771
TAF9	TAF9	-0.000797947	0.767337
COPG1	COPG1	-0.00180513	0.18022
C3orf14	C3orf14	-0.000425738	0.866574
MAP4	MAP4	0.00495009	0.343305
EMC3	EMC3	-0.00230323	0.368922
POLR3H	POLR3H	-0.00159328	0.27688
TXN2	TXN2	-0.00184799	0.441777
CLEC2L	CLEC2L	-0.000344836	0.576515
CDS1	CDS1	0.000305743	0.818529
DGCR2	DGCR2	0.0087005	0.0136071
PRMT2	PRMT2	0.00490571	0.410943
INTS1	INTS1	-0.00674883	0.00508588
DPM1	DPM1	-0.000133174	0.965906
FITM2	FITM2	-0.0019641	0.103559
SLC24A2	SLC24A2	-0.0161029	0.0158884
PKIG	PKIG	0.000967396	0.825996
EDEM2	EDEM2	0.00117572	0.584653
RIPPLY2	RIPPLY2	-0.00115464	0.519117
ZNF133	ZNF133	0.00328693	0.139011
SIRPA	SIRPA	0.00543038	0.215572
PSMD1	PSMD1	0.00488168	0.068443
RETREG2	RETREG2	-0.00478715	0.268656
KCTD18	KCTD18	0.000213842	0.900079
UBE2G2	UBE2G2	0.00384463	0.404454
PDE1A	PDE1A	-0.00796838	0.750104
NPC2	NPC2	-0.0114269	0.029613
ZFAND2B	ZFAND2B	-0.0045114	0.0497518
ACTR10	ACTR10	-0.00170121	0.565943
EFR3B	EFR3B	0.00273232	0.601475
OST4	OST4	-0.00277491	0.508027
SNX17	SNX17	-0.00405394	0.138989
CBLN2	CBLN2	0.00488636	0.0386769
RAP2A	RAP2A	0.00520702	0.238639
TXN	TXN	0.00479685	0.391603
PGRMC2	PGRMC2	-0.00106346	0.83575
BRI3BP	BRI3BP	-0.00134561	0.577156
TYRO3	TYRO3	-0.00314674	0.567648
EDF1	EDF1	-0.00176562	0.741822
ZNF865	ZNF865	-0.0030963	0.00374525
GFRA2	GFRA2	-0.000166291	0.849604
DNAJB9	DNAJB9	0.000365733	0.8397
NECTIN1	NECTIN1	-0.0090008	0.0264326
AURKAIP1	AURKAIP1	-0.00281919	0.561558
TRIM8	TRIM8	0.000425477	0.912026
FH	FH	0.000762621	0.718179
CTSF	CTSF	-0.00782498	0.190508
ABHD13	ABHD13	0.00160094	0.5447
LMO4	LMO4	0.0094222	0.135143
SDF2	SDF2	-0.00433657	0.178352
TRAPPC3	TRAPPC3	-0.0024145	0.279664
FAM120B	FAM120B	0.00878351	0.117776
CHGB	CHGB	0.000853534	0.840011
CDS2	CDS2	0.00758768	0.175228
PTPN4	PTPN4	0.0104805	0.0387353
AP3S1	AP3S1	0.00470404	0.235549
SNX9	SNX9	0.00535847	0.175151
UBE2J1	UBE2J1	-0.00117461	0.474934
MOAP1	MOAP1	0.00175211	0.463404
ALKBH5	ALKBH5	-0.00219592	0.609688
LINC01535	LINC01535	0.000469118	0.910052
DOHH	DOHH	-0.0102179	0.0225026
ZBTB8OS	ZBTB8OS	0.00308654	0.281037
SORT1	SORT1	4.7265e-05	0.990218
ARV1	ARV1	-0.00130541	0.55861
SMUG1	SMUG1	-0.00215939	0.246561
ZC4H2	ZC4H2	-0.00238557	0.546281
PNMA8B	PNMA8B	0.00093784	0.704275
MTCO3P12	MTCO3P12	-0.000434758	0.530454
B9D1	B9D1	0.00241977	0.314535
RNF175	RNF175	0.00132573	0.0492633
EVI5	EVI5	0.00832178	0.0547877
TPP1	TPP1	-0.00620715	0.362179
ENSA	ENSA	-0.000879792	0.898281
STPG1	STPG1	-0.00419012	0.0597966
FBXO44	FBXO44	-0.00610472	0.05511
SLC25A33	SLC25A33	-0.000977992	0.727104
TMCC1	TMCC1	0.013053	0.00951363
PSMD13	PSMD13	0.000897443	0.712154
GABRA1	GABRA1	0.00314472	0.565043
LUZP1	LUZP1	0.00279328	0.198326
MRPL21	MRPL21	-0.00110028	0.513164
KCTD2	KCTD2	-0.00108379	0.400047
ATP6V1B2	ATP6V1B2	0.00221915	0.583651
CAMK1D	CAMK1D	0.0186803	0.0216557
EPHA4	EPHA4	0.00398678	0.285472
MED10	MED10	0.00121479	0.658324
TMEM177	TMEM177	0.00150592	0.288443
SRPRA	SRPRA	-0.000352671	0.869984
LUC7L3	LUC7L3	0.0208819	0.00087228
AP4S1	AP4S1	0.00328761	0.184205
TXNL1	TXNL1	0.00519098	0.13372
UBE2T	UBE2T	-0.00156902	0.0167116
ARHGEF25	ARHGEF25	-0.000388578	0.812038
PSMC2	PSMC2	-0.00216046	0.345685
INA	INA	0.00192229	0.608113
BMPER	BMPER	0.000344932	0.883634
GLUD1	GLUD1	0.00360529	0.356485
CAMK2G	CAMK2G	-0.00153647	0.525106
ATPAF2	ATPAF2	0.00132272	0.418177
SNAPC3	SNAPC3	0.00159603	0.572592
CCDC25	CCDC25	0.00474729	0.002901
RAB39B	RAB39B	-0.00145547	0.420209
MFAP1	MFAP1	0.00133968	0.731088
HAGHL	HAGHL	-0.00332702	0.0758877
WNT10B	WNT10B	-0.000306383	0.684606
HMOX2	HMOX2	-0.00595521	0.116694
GRIN2A	GRIN2A	-0.00536637	0.609358
LCMT1	LCMT1	0.00371328	0.200892
C1orf123	C1orf123	-0.000875913	0.75924
UBB	UBB	-0.00290408	0.144153
CMIP	CMIP	0.00516761	0.409844
CLTC	CLTC	0.00591035	0.074768
AC120114.2	AC120114.2	0.001054	0.27227
TMEM127	TMEM127	-0.00100782	0.468471
CDC37	CDC37	-0.000644373	0.812283
DUSP14	DUSP14	-0.00385033	0.0101305
H2AFY	H2AFY	0.00597749	0.0122018
NT5C3B	NT5C3B	-0.00171258	0.539172
TACO1	TACO1	-0.00117346	0.397406
LSM5	LSM5	0.00423419	0.119946
AMZ2	AMZ2	-0.000475656	0.872519
VGLL4	VGLL4	0.0106754	0.155985
GMPR2	GMPR2	-0.000369932	0.745293
GPS1	GPS1	-0.00583664	0.0258934
RNMT	RNMT	0.00306996	0.356425
TRAPPC4	TRAPPC4	-0.00274326	0.418952
CYSTM1	CYSTM1	-0.000664633	0.876403
USP1	USP1	0.00104584	0.638309
RPL10P16	RPL10P16	-0.0133742	0.0112545
SAT1	SAT1	0.00599242	0.458347
NDUFB7	NDUFB7	-0.00648598	0.295234
POLR2I	POLR2I	-0.0125605	0.111122
ORAI2	ORAI2	0.00191225	0.376009
NEDD8	NEDD8	-0.00122658	0.794257
FLOT2	FLOT2	0.00112964	0.683383
LINC00665	LINC00665	-0.0020937	0.336528
ZNF428	ZNF428	-0.000810106	0.837472
EGR3	EGR3	0.00146274	0.239828
RUVBL2	RUVBL2	-0.0039954	0.269753
MYADM	MYADM	-0.00986036	0.0653037
AAK1	AAK1	0.0143402	0.0146899
PRRG3	PRRG3	-0.00887043	0.254965
HPRT1	HPRT1	0.00559853	0.328072
MAP7D2	MAP7D2	0.00273804	0.616876
TTF1	TTF1	-0.00109174	0.571907
NTMT1	NTMT1	-0.000752013	0.20266
FAM120A	FAM120A	0.00235042	0.405759
OSTF1	OSTF1	-0.000621542	0.923103
DMAC1	DMAC1	-0.0029085	0.395037
POLR2K	POLR2K	-0.00164382	0.520184
DECR1	DECR1	0.00142787	0.717867
SDCBP	SDCBP	0.000370796	0.871894
TNKS	TNKS	0.0127439	0.0625365
MTERF1	MTERF1	0.00534072	0.453907
GNAI1	GNAI1	-0.0101603	0.0323554
NEUROD6	NEUROD6	-0.000227543	0.891496
KDELR2	KDELR2	-0.00343865	0.130315
CLVS2	CLVS2	0.00478894	0.111316
C6orf136	C6orf136	-0.00319807	0.0448526
AL136968.2	AL136968.2	-0.000747591	0.326271
SMIM3	SMIM3	-0.000160211	0.740715
SCAMP1	SCAMP1	0.00997629	0.00451267
PTK2B	PTK2B	0.00649852	0.209358
HSPB3	HSPB3	-0.000240358	0.637418
SMIM14	SMIM14	-0.00129146	0.732626
RSRC1	RSRC1	0.00568574	0.492857
MBNL1	MBNL1	0.00420975	0.503873
PXK	PXK	-0.00968707	0.0603448
RPSA	RPSA	-0.00503859	0.53336
CBS	CBS	-0.00478007	0.11594
FP236383.2	FP236383.2	-0.003748	0.626955
ADRM1	ADRM1	-0.0112851	0.0154416
PSMA7	PSMA7	0.00193877	0.703707
ACOT8	ACOT8	-0.000519988	0.649848
GAB1	GAB1	-0.0115334	0.0149512
NNAT	NNAT	0.00167928	0.428645
FRG1BP	FRG1BP	-0.0123882	0.00705211
TMEM230	TMEM230	-0.000440798	0.803759
SPCS3	SPCS3	0.00291592	0.370171
PLEKHA3	PLEKHA3	0.00651998	0.119267
HIST1H4C	HIST1H4C	-0.00221315	0.757584
PAIP2B	PAIP2B	-0.0036613	0.395475
TCEA2	TCEA2	-0.00377275	0.245367
MTIF3	MTIF3	0.000167158	0.930211
BNIP3	BNIP3	-0.00484444	0.231586
UBE2QL1	UBE2QL1	0.000726702	0.706936
DDX50	DDX50	0.00699206	0.0173582
KCTD4	KCTD4	-0.00961425	0.080857
TCTN1	TCTN1	0.00162633	0.457809
STX1A	STX1A	0.000305634	0.903232
PSME1	PSME1	-0.00513463	0.0741705
SEC16A	SEC16A	0.00524726	0.0106221
CD63	CD63	0.0058054	0.490831
RALYL	RALYL	0.0268637	0.00407019
NR1D2	NR1D2	-0.00060455	0.880854
PRPF38B	PRPF38B	0.000671241	0.874286
KCNMB4	KCNMB4	-0.00639704	0.47855
SNUPN	SNUPN	-0.00258029	0.15074
TRIM69	TRIM69	0.00137219	0.542041
HNRNPA2B1	HNRNPA2B1	0.010258	0.186793
RALBP1	RALBP1	0.00691587	0.00937948
TESPA1	TESPA1	0.000640351	0.813895
NABP2	NABP2	-0.00214336	0.156788
RPL14P1	RPL14P1	-0.00876274	0.0118092
RBM27	RBM27	-0.000991386	0.432631
CCDC124	CCDC124	-0.00453114	0.310748
HADH	HADH	0.00358109	0.0713481
MKRN1	MKRN1	-0.00193246	0.391087
SNX27	SNX27	0.00405226	0.38182
NIM1K	NIM1K	-0.000826957	0.850528
HTRA1	HTRA1	0.00220626	0.675597
PDZD11	PDZD11	-0.00134324	0.163493
ABRAXAS2	ABRAXAS2	-0.00257022	0.151539
LINC00507	LINC00507	9.71829e-05	0.848012
ARPC5	ARPC5	0.0032652	0.446143
DTD1	DTD1	-0.00149995	0.531072
RPS8	RPS8	0.0103732	0.219814
RALGPS2	RALGPS2	0.00497146	0.0058549
SLX1A	SLX1A	-0.0020646	0.0686618
KCNIP2	KCNIP2	-0.00202298	0.31008
PHYHIPL	PHYHIPL	-0.00423875	0.58533
SLIT3	SLIT3	-0.00153935	0.402487
RWDD1	RWDD1	0.000785997	0.842646
TRAPPC1	TRAPPC1	-0.0106577	0.0118991
ATAD3B	ATAD3B	-0.000291641	0.880537
NETO1	NETO1	0.00286957	0.23395
SSR4	SSR4	-0.00295387	0.559133
TROVE2	TROVE2	-0.00017482	0.964021
EPS15	EPS15	0.00628785	0.424384
VPS29	VPS29	0.00170056	0.424226
CALR	CALR	0.00018463	0.967382
FERMT2	FERMT2	-0.00239986	0.530775
NFX1	NFX1	0.00367181	0.270082
ROMO1	ROMO1	-0.00308317	0.152066
RABGGTB	RABGGTB	-0.000752523	0.741719
RPS7P1	RPS7P1	-0.00117636	0.4031
SPOCK2	SPOCK2	0.0018575	0.589979
RTCA	RTCA	0.014329	0.143902
KCNK1	KCNK1	-0.00301722	0.654028
HBS1L	HBS1L	-0.000129338	0.975781
SHTN1	SHTN1	-0.00564025	0.307384
PDCL3	PDCL3	-0.000416303	0.80773
CNIH4	CNIH4	0.000658865	0.857055
FBXO28	FBXO28	-0.00137944	0.737014
CDK2AP2	CDK2AP2	-0.00912764	0.173834
RTN3	RTN3	0.00259323	0.677706
MAP3K2	MAP3K2	0.0131382	0.0561911
COMMD8	COMMD8	9.18718e-05	0.937693
CACNG3	CACNG3	0.00220763	0.33073
TIMM10	TIMM10	-0.00143645	0.459942
SLC25A27	SLC25A27	0.00167877	0.729008
ETNK1	ETNK1	0.00900253	0.111795
GABARAPL2	GABARAPL2	0.000662667	0.930603
IRF2BPL	IRF2BPL	-0.00803689	0.00194328
AC091138.1	AC091138.1	-0.000243794	0.773024
SLIRP	SLIRP	-0.000174835	0.96835
IFI27L2	IFI27L2	-0.00651694	0.0963146
MAP2K1	MAP2K1	0.00267924	0.252006
AL163051.2	AL163051.2	-0.00119418	0.213753
CTNNBL1	CTNNBL1	0.00561496	0.0122656
CINP	CINP	-0.00242731	0.288094
PRKAR1A	PRKAR1A	-0.00270152	0.579922
RABL6	RABL6	-0.00218413	0.407181
ALDH2	ALDH2	0.00171002	0.709196
GRHL1	GRHL1	-0.000949541	0.06813
FAM57B	FAM57B	-0.000850831	0.126362
FTH1P20	FTH1P20	-0.00196524	0.316242
GLG1	GLG1	0.00861766	0.015048
CAMTA2	CAMTA2	0.000501983	0.777694
NDEL1	NDEL1	0.00531559	0.134696
RPS19BP1	RPS19BP1	-0.000565335	0.922411
MAPRE2	MAPRE2	0.00301889	0.565508
RPL41P2	RPL41P2	-0.00388413	0.263649
U2AF2	U2AF2	0.00215058	0.48471
CNDP1	CNDP1	-0.0134141	0.236361
RABEPK	RABEPK	-0.00456679	0.218829
MATK	MATK	0.000274863	0.847774
SMIM7	SMIM7	-0.00241811	0.27598
YJEFN3	YJEFN3	-0.00267818	0.538901
MRPL54	MRPL54	0.000211557	0.913785
UBAC2	UBAC2	0.00704446	0.19198
RAB3C	RAB3C	0.00441202	0.38957
[truncated: 14,956 more rows]

## Sheet: GO_CAG_regression
query	significant	p_value	term_size	query_size	intersection_size	precision	recall	term_id	source	term_name	effective_domain_size	source_order	parents	negative_log10_of_adjusted_p_value	term_overlap	Significance
query_1	TRUE	3.48077e-08	1767	482	96	0.19917	0.0543294	GO:0003723	GO:MF	GO:MF_RNA binding	17371	438	GO:0003676	17.1734	0.0543294	Both
query_1	TRUE	1.10691e-07	2022	482	104	0.215768	0.0514342	GO:0140096	GO:MF	GO:MF_catalytic activity, acting on a protein	17371	11779	GO:0003824	16.0165	0.0514342	Both
query_1	TRUE	1.27818e-05	420	482	34	0.0705394	0.0809524	GO:0019787	GO:MF	GO:MF_ubiquitin-like protein transferase activity	17371	4570	GO:0016740|GO:0140096	11.2675	0.0809524	Both
query_1	TRUE	3.89434e-05	398	482	32	0.06639	0.080402	GO:0004842	GO:MF	GO:MF_ubiquitin-protein transferase activity	17371	1399	GO:0019787	10.1534	0.080402	Both
query_1	TRUE	0.000130872	2019	482	94	0.195021	0.0465577	GO:0016740	GO:MF	GO:MF_transferase activity	17371	3716	GO:0003824	8.94129	0.0465577	Both
query_1	TRUE	0.000194467	515	482	36	0.0746888	0.0699029	GO:0004672	GO:MF	GO:MF_protein kinase activity	17371	1251	GO:0016301|GO:0016773|GO:0140096	8.54525	0.0699029	Both
query_1	TRUE	0.000600948	610	482	39	0.0809129	0.0639344	GO:0016773	GO:MF	GO:MF_phosphotransferase activity, alcohol group as acceptor	17371	3746	GO:0016772	7.417	0.0639344	Both
query_1	TRUE	0.00133972	625	313	40	0.127796	0.064	REAC:R-HSA-199991	REAC	REAC_Membrane Trafficking	10622	1290	REAC:R-HSA-5653656	6.6153	0.064	Both
query_1	TRUE	0.00185913	139	214	14	0.0654206	0.100719	KEGG:04120	KEGG	KEGG_Ubiquitin mediated proteolysis	8000	251	KEGG:00000	6.28764	0.100719	Both
query_1	TRUE	0.00552425	278	482	22	0.0456432	0.0791367	GO:0061659	GO:MF	GO:MF_ubiquitin-like protein ligase activity	17371	9660	GO:0019787	5.19861	0.0791367	Both
query_1	TRUE	0.00621924	20	482	6	0.0124481	0.3	GO:0051010	GO:MF	GO:MF_microtubule plus-end binding	17371	9091	GO:0008017	5.08011	0.3	Both
query_1	TRUE	0.00957527	267	482	21	0.0435685	0.0786517	GO:0061630	GO:MF	GO:MF_ubiquitin protein ligase activity	17371	9646	GO:0004842|GO:0061659	4.64857	0.0786517	Both
query_1	TRUE	0.00990212	662	482	38	0.0788382	0.0574018	GO:0016301	GO:MF	GO:MF_kinase activity	17371	3491	GO:0016772	4.61501	0.0574018	Both
query_1	TRUE	0.0115102	13906	482	420	0.871369	0.0302028	GO:0005515	GO:MF	GO:MF_protein binding	17371	1879	GO:0005488	4.46452	0.0302028	Both
query_1	TRUE	0.0167939	365	482	25	0.0518672	0.0684932	GO:0004674	GO:MF	GO:MF_protein serine/threonine kinase activity	17371	1253	GO:0004672	4.08674	0.0684932	Both
query_1	TRUE	0.0185637	390	482	26	0.0539419	0.0666667	GO:0016887	GO:MF	GO:MF_ATPase	17371	3852	GO:0003674	3.98655	0.0666667	Both
query_1	TRUE	0.0216112	114	214	11	0.0514019	0.0964912	KEGG:04724	KEGG	KEGG_Glutamatergic synapse	8000	334	KEGG:00000	3.83455	0.0964912	Both
query_1	TRUE	0.0265717	127	482	13	0.026971	0.102362	GO:0008094	GO:MF	GO:MF_ATPase, acting on DNA	17371	1961	GO:0016887|GO:0140097	3.62791	0.102362	Both
query_1	TRUE	0.0326252	3628	482	136	0.282158	0.0374862	GO:0003676	GO:MF	GO:MF_nucleic acid binding	17371	399	GO:0097159|GO:1901363	3.42267	0.0374862	Both
query_1	TRUE	0.0353651	719	313	40	0.127796	0.0556328	REAC:R-HSA-5653656	REAC	REAC_Vesicle-mediated transport	10622	2418	REAC:0000000	3.34203	0.0556328	Both
query_1	TRUE	2.43982e-11	2022	1508	270	0.179045	0.133531	GO:0140096	GO:MF	GO:MF_catalytic activity, acting on a protein	17371	11779	GO:0003824	24.4365	0.133531	OPC
query_1	TRUE	1.07726e-07	13906	1508	1297	0.86008	0.0932691	GO:0005515	GO:MF	GO:MF_protein binding	17371	1879	GO:0005488	16.0437	0.0932691	OPC
query_1	TRUE	1.10402e-06	2019	1508	249	0.165119	0.123328	GO:0016740	GO:MF	GO:MF_transferase activity	17371	3716	GO:0003824	13.7166	0.123328	OPC
query_1	TRUE	8.11485e-06	139	662	32	0.0483384	0.230216	KEGG:04120	KEGG	KEGG_Ubiquitin mediated proteolysis	8000	251	KEGG:00000	11.7218	0.230216	OPC
query_1	TRUE	1.37372e-05	610	1508	94	0.0623342	0.154098	GO:0016773	GO:MF	GO:MF_phosphotransferase activity, alcohol group as acceptor	17371	3746	GO:0016772	11.1954	0.154098	OPC
query_1	TRUE	2.05376e-05	1737	1508	214	0.14191	0.123201	GO:0019899	GO:MF	GO:MF_enzyme binding	17371	4618	GO:0005515	10.7933	0.123201	OPC
query_1	TRUE	3.28852e-05	1767	1508	216	0.143236	0.122241	GO:0003723	GO:MF	GO:MF_RNA binding	17371	438	GO:0003676	10.3225	0.122241	OPC
query_1	TRUE	7.40284e-05	468	1508	75	0.0497347	0.160256	GO:0003712	GO:MF	GO:MF_transcription coregulator activity	17371	428	GO:0140110	9.51106	0.160256	OPC
query_1	TRUE	0.000108805	515	1508	80	0.0530504	0.15534	GO:0004672	GO:MF	GO:MF_protein kinase activity	17371	1251	GO:0016301|GO:0016773|GO:0140096	9.12595	0.15534	OPC
query_1	TRUE	0.000118575	625	963	95	0.0986501	0.152	REAC:R-HSA-199991	REAC	REAC_Membrane Trafficking	10622	1290	REAC:R-HSA-5653656	9.03997	0.152	OPC
query_1	TRUE	0.000157598	252	662	44	0.0664653	0.174603	KEGG:04144	KEGG	KEGG_Endocytosis	8000	261	KEGG:00000	8.75546	0.174603	OPC
query_1	TRUE	0.000191194	121	1508	29	0.0192308	0.239669	GO:0019783	GO:MF	GO:MF_ubiquitin-like protein-specific protease activity	17371	4566	GO:0008234	8.56222	0.239669	OPC
query_1	TRUE	0.000255694	365	1508	61	0.0404509	0.167123	GO:0004674	GO:MF	GO:MF_protein serine/threonine kinase activity	17371	1253	GO:0004672	8.27153	0.167123	OPC
query_1	TRUE	0.000406161	420	1508	67	0.0444297	0.159524	GO:0019787	GO:MF	GO:MF_ubiquitin-like protein transferase activity	17371	4570	GO:0016740|GO:0140096	7.80876	0.159524	OPC
query_1	TRUE	0.000518891	1476	963	185	0.192108	0.125339	REAC:R-HSA-74160	REAC	REAC_Gene expression (Transcription)	10622	951	REAC:0000000	7.56382	0.125339	OPC
query_1	TRUE	0.000540257	398	1508	64	0.0424403	0.160804	GO:0004842	GO:MF	GO:MF_ubiquitin-protein transferase activity	17371	1399	GO:0019787	7.52347	0.160804	OPC
query_1	TRUE	0.000632388	662	1508	94	0.0623342	0.141994	GO:0016301	GO:MF	GO:MF_kinase activity	17371	3491	GO:0016772	7.36601	0.141994	OPC
query_1	TRUE	0.00111099	331	1508	55	0.0364721	0.166163	GO:0045296	GO:MF	GO:MF_cadherin binding	17371	7174	GO:0050839	6.80251	0.166163	OPC
query_1	TRUE	0.00135933	73	1508	20	0.0132626	0.273973	GO:0003725	GO:MF	GO:MF_double-stranded RNA binding	17371	440	GO:0003723	6.60076	0.273973	OPC
query_1	TRUE	0.00160113	796	1508	107	0.0709549	0.134422	GO:0016772	GO:MF	GO:MF_transferase activity, transferring phosphorus-containing groups	17371	3745	GO:0016740	6.43705	0.134422	OPC
query_1	TRUE	0.00212376	144	963	31	0.0321911	0.215278	REAC:R-HSA-8856828	REAC	REAC_Clathrin-mediated endocytosis	10622	347	REAC:R-HSA-199991	6.15457	0.215278	OPC
query_1	TRUE	0.00235835	108	1508	25	0.0165782	0.231481	GO:0004843	GO:MF	GO:MF_thiol-dependent deubiquitinase	17371	1400	GO:0008242|GO:0101005	6.04979	0.231481	OPC
query_1	TRUE	0.00279977	246	662	40	0.060423	0.162602	KEGG:05131	KEGG	KEGG_Shigellosis	8000	406	KEGG:00000	5.87822	0.162602	OPC
query_1	TRUE	0.00309232	524	1508	76	0.0503979	0.145038	GO:0050839	GO:MF	GO:MF_cell adhesion molecule binding	17371	9081	GO:0005515	5.77883	0.145038	OPC
query_1	TRUE	0.00544775	4812	1508	490	0.324934	0.101829	GO:0003824	GO:MF	GO:MF_catalytic activity	17371	512	GO:0003674	5.21255	0.101829	OPC
query_1	TRUE	0.00650596	114	1508	25	0.0165782	0.219298	GO:0008242	GO:MF	GO:MF_omega peptidase activity	17371	2055	GO:0008233	5.03504	0.219298	OPC
query_1	TRUE	0.00650596	114	1508	25	0.0165782	0.219298	GO:0101005	GO:MF	GO:MF_deubiquitinase activity	17371	10494	GO:0019783	5.03504	0.219298	OPC
query_1	TRUE	0.00663951	44	1508	14	0.00928382	0.318182	GO:0005048	GO:MF	GO:MF_signal sequence binding	17371	1573	GO:0042277	5.01472	0.318182	OPC
query_1	TRUE	0.00783003	261	1508	44	0.0291777	0.168582	GO:0003713	GO:MF	GO:MF_transcription coactivator activity	17371	429	GO:0003712	4.84979	0.168582	OPC
query_1	TRUE	0.00897004	69	1508	18	0.0119363	0.26087	GO:0070063	GO:MF	GO:MF_RNA polymerase binding	17371	9831	GO:0019899	4.71387	0.26087	OPC
query_1	TRUE	2.2164e-06	1737	1646	235	0.14277	0.135291	GO:0019899	GO:MF	GO:MF_enzyme binding	17371	4618	GO:0005515	13.0196	0.135291	OL
query_1	TRUE	4.75028e-06	588	1646	99	0.0601458	0.168367	GO:0008047	GO:MF	GO:MF_enzyme activator activity	17371	1944	GO:0003674	12.2573	0.168367	OL
query_1	TRUE	8.7585e-06	350	1646	67	0.0407047	0.191429	GO:0005096	GO:MF	GO:MF_GTPase activator activity	17371	1605	GO:0008047|GO:0030695	11.6455	0.191429	OL
query_1	TRUE	2.11387e-05	380	1646	70	0.0425273	0.184211	GO:0030695	GO:MF	GO:MF_GTPase regulator activity	17371	4935	GO:0060589	10.7644	0.184211	OL
query_1	TRUE	0.000114913	2022	1646	257	0.156136	0.127102	GO:0140096	GO:MF	GO:MF_catalytic activity, acting on a protein	17371	11779	GO:0003824	9.07134	0.127102	OL
query_1	TRUE	0.000161211	13906	1646	1393	0.846294	0.100173	GO:0005515	GO:MF	GO:MF_protein binding	17371	1879	GO:0005488	8.7328	0.100173	OL
query_1	TRUE	0.000181855	136	738	31	0.0420054	0.227941	KEGG:05135	KEGG	KEGG_Yersinia infection	8000	410	KEGG:00000	8.6123	0.227941	OL
query_1	TRUE	0.000210504	418	1646	72	0.0437424	0.172249	GO:0060589	GO:MF	GO:MF_nucleoside-triphosphatase regulator activity	17371	9603	GO:0030234	8.46601	0.172249	OL
query_1	TRUE	0.000522175	722	1646	108	0.0656136	0.149584	GO:0030234	GO:MF	GO:MF_enzyme regulator activity	17371	4773	GO:0098772	7.55751	0.149584	OL
query_1	TRUE	0.00201701	2019	1646	249	0.151276	0.123328	GO:0016740	GO:MF	GO:MF_transferase activity	17371	3716	GO:0003824	6.20614	0.123328	OL
query_1	TRUE	0.00205016	625	1069	98	0.0916745	0.1568	REAC:R-HSA-199991	REAC	REAC_Membrane Trafficking	10622	1290	REAC:R-HSA-5653656	6.18984	0.1568	OL
query_1	TRUE	0.0040176	420	1646	68	0.0413123	0.161905	GO:0019787	GO:MF	GO:MF_ubiquitin-like protein transferase activity	17371	4570	GO:0016740|GO:0140096	5.51707	0.161905	OL
query_1	TRUE	0.00597446	124	738	26	0.0352304	0.209677	KEGG:04611	KEGG	KEGG_Platelet activation	8000	301	KEGG:00000	5.12026	0.209677	OL
query_1	TRUE	0.00774453	278	1646	49	0.0297691	0.176259	GO:0061659	GO:MF	GO:MF_ubiquitin-like protein ligase activity	17371	9660	GO:0019787	4.86077	0.176259	OL
query_1	TRUE	0.0081833	889	1646	122	0.0741191	0.137233	GO:0098772	GO:MF	GO:MF_molecular function regulator	17371	10428	GO:0003674	4.80566	0.137233	OL
query_1	TRUE	0.0108303	177	1646	35	0.0212637	0.19774	GO:0031267	GO:MF	GO:MF_small GTPase binding	17371	5056	GO:0051020	4.5254	0.19774	OL
query_1	TRUE	0.0121273	8	1069	6	0.00561272	0.75	REAC:R-HSA-112411	REAC	REAC_MAPK1 (ERK2) activation	10622	1236	REAC:R-HSA-112409	4.4123	0.75	OL
query_1	TRUE	0.0137594	802	1646	111	0.0674362	0.138404	GO:0008092	GO:MF	GO:MF_cytoskeletal protein binding	17371	1959	GO:0005515	4.28603	0.138404	OL
query_1	TRUE	0.0164053	144	1069	31	0.0289991	0.215278	REAC:R-HSA-9679506	REAC	REAC_SARS-CoV Infections	10622	1928	REAC:R-HSA-5663205	4.11015	0.215278	OL
query_1	TRUE	0.017398	398	1646	63	0.0382746	0.158291	GO:0004842	GO:MF	GO:MF_ubiquitin-protein transferase activity	17371	1399	GO:0019787	4.0514	0.158291	OL
query_1	TRUE	0.021806	119	738	24	0.0325203	0.201681	KEGG:04071	KEGG	KEGG_Sphingolipid signaling pathway	8000	241	KEGG:00000	3.82557	0.201681	OL
query_1	TRUE	0.0293789	114	738	23	0.0311653	0.201754	KEGG:04724	KEGG	KEGG_Glutamatergic synapse	8000	334	KEGG:00000	3.52748	0.201754	OL
query_1	TRUE	0.0352284	331	738	50	0.0677507	0.151057	KEGG:05165	KEGG	KEGG_Human papillomavirus infection	8000	424	KEGG:00000	3.3459	0.151057	OL
query_1	TRUE	0.0381812	216	738	36	0.0487805	0.166667	KEGG:04810	KEGG	KEGG_Regulation of actin cytoskeleton	8000	345	KEGG:00000	3.26541	0.166667	OL
query_1	TRUE	0.0415603	144	1069	30	0.0280636	0.208333	REAC:R-HSA-8856828	REAC	REAC_Clathrin-mediated endocytosis	10622	347	REAC:R-HSA-199991	3.18061	0.208333	OL
query_1	TRUE	0.044477	147	738	27	0.0365854	0.183673	KEGG:05224	KEGG	KEGG_Breast cancer	8000	451	KEGG:00000	3.11278	0.183673	OL
query_1	TRUE	0.0474884	35	1069	12	0.0112254	0.342857	REAC:R-HSA-5663213	REAC	REAC_RHO GTPases Activate WASPs and WAVEs	10622	1701	REAC:R-HSA-195258	3.04727	0.342857	OL
query_1	TRUE	0.0497628	148	738	27	0.0365854	0.182432	KEGG:05226	KEGG	KEGG_Gastric cancer	8000	453	KEGG:00000	3.00049	0.182432	OL
