# Supplementary material for: Huntington disease oligodendrocyte maturation deficits revealed by single-nucleus RNAseq are rescued by thiamine-biotin supplementation
Source: Nat Commun. 2022 Dec 21;13:7791. doi: 10.1038/s41467-022-35388-x (PMC9772349; doi:10.1038/s41467-022-35388-x)
Supplement: Supplementary file 10 — Supplementary Dataset 8 [file 41467_2022_35388_MOESM10_ESM.xlsx]

## Sheet: oligo_de_accumbens
	logFC	logCPM	F	PValue
AC007325.4	-0.0111483	9.76097	1.10571	0.679752
TCEAL3	0.0253876	9.82693	0.981928	0.504416
BEX2	0.135947	9.85862	23.0891	0.000370381
PGK1	0.278831	9.84216	100.322	7.29614e-13
TSPAN7	-0.34324	9.78931	293.189	3.28506e-22
TMSB4X	-0.128502	10.0889	23.3977	1.03954e-05
MRPL41	0.00328491	9.80292	0.0205396	0.929482
GRIN1	-0.142466	9.7744	74.3982	1.5436e-05
PTGDS	-0.546697	10.0704	455.219	3.10959e-85
MAPKAP1	-0.00579231	10.02	0.0414104	0.85606
ATP6V1G1	0.176331	9.83202	44.3672	4.7004e-06
HNRNPK	0.153718	10.006	30.4465	3.60081e-06
RPS6	0.0202992	9.99068	0.4997	0.539589
EIF3E	0.0474167	9.99822	2.76319	0.150072
CLU	0.402909	10.234	277.77	3.83354e-48
NEFL	-0.210873	9.76179	335.57	1.59302e-13
PTPRN2	-0.0410285	9.82751	2.42521	0.27813
DYNC1I1	0.119913	10.0636	16.2411	0.000113179
PURB	0.0121132	9.86752	0.185762	0.746523
PPIA	0.0260071	9.89453	0.82112	0.478346
CDK13	0.0865488	10.2997	18.0576	0.000490509
NDUFA4	-0.0571507	9.91557	3.89806	0.107807
RRS1	0.00955154	9.7518	3.41058	0.607468
PSMG3	0.0432382	9.76826	10.0311	0.15365
SYNE1	0.229493	10.0911	75.3708	7.9315e-14
AL356599.1	-0.176696	9.83924	43.8239	2.19542e-06
FAM110B	-0.0635274	9.76267	29.0527	0.0249651
TSPYL1	-0.057443	9.81518	5.44996	0.126385
PPIL6	0.0896902	9.77582	29.8116	0.00617224
HSP90AB1	0.223018	10.2857	80.7417	3.81267e-18
RPL10A	0.0551634	9.90677	3.59265	0.129451
ATP6V1G2	-0.0276687	9.75254	22.1001	0.170267
ZKSCAN8	0.172084	9.84961	39.035	7.67919e-06
NOL7	0.264944	9.858	88.7418	7.45095e-12
TUBB2B	-0.00716862	9.78926	0.123539	0.840956
FLOT1	-0.0899605	9.81568	13.7207	0.0164708
CXXC5	-0.113821	9.9072	15.8482	0.00138424
MATR3	0.16843	10.3087	72.9256	1.53675e-11
VDAC1	0.0471858	9.83099	3.21089	0.21587
MEF2C	-0.00223797	9.80638	0.00827683	0.952139
SMN1	0.35739	9.82849	182.107	4.03496e-20
TCEAL2	-0.0869331	9.79169	17.8701	0.0157391
SMN2	0.506196	9.83948	332.96	1.08314e-37
SUB1	-0.0168438	9.87383	0.352333	0.650433
BASP1	-0.129014	9.77583	58.0193	0.000106978
RETREG1	-0.257514	10.2346	133.67	3.81608e-25
RPS20	0.0797681	9.93742	7.26915	0.0240694
CPE	0.206327	9.96869	46.0364	3.02683e-09
CISD2	0.114589	9.81806	21.2198	0.00262024
HNRNPDL	-0.0208048	10.209	0.888355	0.430521
TBC1D1	-0.048363	9.79917	4.53541	0.188329
QDPR	-0.126958	10.6368	88.9086	1.25691e-11
ADD1	0.0630375	10.2371	7.62646	0.0156776
NSD2	-0.179358	9.87848	38.8212	7.89908e-07
SLBP	0.166475	9.86227	31.6742	1.33166e-05
IQCJ-SCHIP1	0.0349565	10.1447	1.80833	0.216382
H1FX	0.116365	9.80419	25.2091	0.00183777
TCEAL6	-0.0343268	9.75993	11.5766	0.19608
RAB7A	0.140573	10.0673	25.0369	5.93523e-06
FAM162A	0.00664724	9.80587	0.0800761	0.858627
SHISA5	-0.152404	9.78016	74.0262	8.62827e-06
SETMAR	0.203424	9.77418	177.642	1.15554e-10
PRKAG2-AS1	-0.00920269	9.74743	22.214	0.41297
DGCR6L	-0.0301803	9.76945	4.58384	0.332467
DGCR6	-0.033152	9.76383	7.66345	0.24879
SMIM11A	0.0804896	9.82082	10.2605	0.034537
SON	0.267468	10.1809	119.566	3.92635e-21
SOD1	0.464852	10.0355	227.069	2.45761e-43
SMIM11B	0.0680378	9.81381	7.77375	0.0720685
TAF1	0.00753296	9.98286	0.0679127	0.821054
CDH4	-0.0135055	9.77716	0.611363	0.686227
RPL32	0.0448292	10.0541	2.53206	0.148434
BLCAP	-0.142081	9.80971	36.3347	0.000133088
NORAD	0.0420116	9.9114	2.06613	0.245218
MAP1B	0.0166568	10.2171	0.550912	0.527622
PDRG1	0.0386119	9.76353	11.1107	0.168895
NSFL1C	-0.0403678	9.82661	2.52571	0.285921
ITM2C	-0.162918	9.82338	40.7325	1.33908e-05
RPL37A	0.0309278	10.1341	1.41999	0.278719
SPATS2L	0.0352782	10.0916	1.52778	0.236478
CHN1	-0.120481	9.87904	16.9533	0.000982431
RASGEF1B	0.174108	10.1333	42.5628	2.53113e-09
ORC4	0.239454	9.99009	59.6628	2.40956e-12
CMSS1	0.197018	9.8447	50.8416	3.31394e-07
RPL6	-0.0862463	9.97058	8.77329	0.00964903
ANAPC16	0.20727	10.0099	48.6005	4.81761e-10
DCTN2	0.0469114	9.86108	2.86846	0.214316
SRSF5	0.131759	10.0528	23.9714	2.82539e-05
GPX4	-0.0279601	9.85764	1.00325	0.456577
CCDC59	0.122461	9.92592	15.2663	0.000667444
TPT1	0.0925758	10.1165	11.1572	0.00159436
MYL6	0.12898	9.86489	20.5589	0.000692604
GTF3C6	0.0455366	9.79538	4.56795	0.212064
CWC15	0.127053	9.83252	23.4146	0.000931266
BEX1	-0.0508613	9.8497	3.40514	0.176517
ATP6V1F	0.0011445	9.79766	0.00273615	0.975113
PSMC6	0.116336	9.86675	16.9168	0.00215702
FHL1	-0.00738707	9.76811	0.285391	0.808762
PFDN5	0.0977618	9.87689	11.3943	0.00926352
ARF5	-0.0352808	9.75078	56.8562	0.0510496
MLLT11	-0.0440262	9.76249	14.8343	0.117408
RNPS1	-0.029896	9.85512	1.19707	0.426623
ZCRB1	0.0155105	9.78494	0.666268	0.657934
SSB	0.247812	9.85485	76.708	1.46957e-10
DYNLL1	0.12261	10.0835	17.962	5.66033e-05
PFKP	-0.0250097	9.763	4.47515	0.376224
COPS7A	-0.00226996	9.78293	0.0154987	0.947819
SERPINI1	0.17643	10.0132	35.5511	9.22852e-08
TMEM120B	-0.00544126	9.77554	0.108902	0.868984
UBE4A	0.0338954	9.99644	1.43264	0.30355
NUCKS1	0.0451789	10.2205	4.08086	0.0870181
DNAJB6	0.448855	10.0612	224.667	8.64271e-43
NDUFC2	-0.150233	9.79305	51.5199	3.13023e-05
CDC42	-0.00259445	10.0326	0.00898214	0.934431
SUMO2	0.0541808	9.8771	3.61778	0.147168
RPL35	0.0527944	9.97631	3.31435	0.117969
NDUFS8	0.0396618	9.79779	3.30504	0.280293
NRXN3	-0.561243	10.6507	1367.51	5.96693e-230
LDHB	0.0594297	9.89919	4.09822	0.105109
ISCA1	0.131888	9.84292	23.507	0.000590822
FAU	-0.0287862	10.0479	1.09363	0.351244
RPL27	0.0739428	9.88704	6.45389	0.0465479
PLD3	0.0600396	9.92251	4.16967	0.0937457
CELF1	0.176398	10.014	36.8146	9.05335e-08
MPHOSPH10	0.199432	9.83848	54.9337	2.41849e-07
NDUFB10	-0.060574	9.82824	5.6669	0.108816
THYN1	0.0367081	9.77291	5.73077	0.25225
LINC00294	0.00667803	9.76859	0.23442	0.827476
C11orf58	0.116996	9.94043	16.0885	0.000956232
HLTF	0.110692	9.93601	13.9325	0.00185112
PSMA1	-0.0553543	9.78936	7.5864	0.121299
HRAS	-0.0437706	9.77763	6.52404	0.192775
LRRC27	0.0121485	9.76221	1.20483	0.659152
MRPL57	0.00988409	9.79887	0.204598	0.788289
COX6A1	0.14542	9.86083	25.7607	0.000139397
THRA	0.0932817	9.97993	10.4764	0.00582638
ZNF638	-0.110398	10.635	109.952	4.43847e-09
ATP2B1	-0.166146	10.02	35.0808	9.96011e-08
PPT1	-0.0157987	9.81015	0.448792	0.673501
RPS18	-0.00173127	10.0593	0.00399568	0.954861
SCG5	0.065235	9.8559	5.55056	0.0857206
HSP90B1	-0.123152	9.94108	18.0335	0.000325595
RPL19	0.0740953	10.0689	7.15198	0.0157343
YWHAG	0.113755	9.91306	14.621	0.00178949
PFDN4	0.0848397	9.78357	20.6808	0.0144175
RNH1	-0.062661	9.90918	4.92357	0.0796646
RNF11	0.0260517	9.85426	0.865915	0.491184
YTHDF2	0.0593826	9.83278	5.07682	0.119784
KCNAB2	0.00806909	9.76613	0.389337	0.785063
ACTB	0.0165837	10.2775	0.639084	0.507265
RPL4	-0.100109	9.85789	13.3594	0.00721646
ADD2	-0.00604941	9.75797	0.442347	0.808208
MRPL30	0.0231473	9.75331	14.451	0.251294
TESC	-0.0780911	9.75289	152.237	0.000236425
SH3PXD2A	-0.0529367	9.98986	3.36931	0.10625
AP2M1	-0.0327167	9.83359	1.55872	0.387644
ACBD7	0.0096334	9.74851	12.7494	0.462285
CLDND1	-0.24843	10.4276	232.654	1.59499e-31
PFDN2	0.0423227	9.86274	2.29858	0.261858
BTF3	0.119906	9.88367	17.3528	0.00136939
AASDHPPT	0.0660489	9.85159	5.70773	0.0825476
SGIP1	0.17115	10.2113	50.976	2.94465e-10
HSP90AA1	0.167572	10.6858	116.992	1.58592e-18
RPS5	0.00452026	9.92611	0.0236012	0.898487
SNX3	0.294706	9.94521	89.8968	3.23062e-16
YWHAH	-0.107898	9.78698	30.3558	0.00229431
UBC	0.548361	10.1673	416.218	1.62784e-74
TPI1	-0.0500305	9.80753	4.49108	0.179829
EEF1A1	-0.172345	10.2232	56.8484	1.26492e-11
FAM13A	0.0452285	9.86148	2.36977	0.231044
PPP2R1A	-0.0392678	9.84019	2.19609	0.299016
H2AFZ	0.220805	9.83009	68.6858	1.07983e-08
C1orf216	-0.0333646	9.75754	14.1691	0.179968
GPR162	-0.0202938	9.74928	32.7303	0.189021
NFU1	0.0469912	9.83293	3.23705	0.217822
SNCB	-0.00914282	9.74847	10.3006	0.502733
SELENOW	0.0887417	10.1392	12.3168	0.00196155
ZNF252P	0.0342743	9.79469	2.60556	0.346518
TKT	0.0240621	9.85806	0.756947	0.523931
CFL1	0.0695467	9.9036	5.69312	0.0571409
CHD5	0.0452133	9.75287	61.765	0.0183529
TCEAL1	0.0932091	9.77562	32.423	0.00433853
NPM1	0.167647	9.92974	32.6794	3.33697e-06
RPL11	-0.00857845	10.1084	0.108481	0.76812
MECR	0.0946691	9.78071	28.6323	0.00540333
CSDE1	0.141146	9.99164	24.5257	2.70658e-05
TAF13	0.127914	9.79158	39.1423	0.000380346
CACUL1	0.184556	9.92766	37.635	3.47731e-07
RPL22	0.102981	9.94993	12.1154	0.00325393
TIMM8B	0.00660525	9.76984	0.212076	0.831921
ZSWIM7	0.0374247	9.82028	2.19787	0.324143
C9orf78	0.151585	9.81312	38.7555	6.498e-05
MRPL33	0.0686006	9.82147	7.25107	0.0715102
TRA2B	0.177268	9.93439	36.0365	8.09535e-07
AJAP1	-0.11308	9.81985	19.9359	0.00258745
PAPSS1	0.0512637	9.92478	2.95757	0.150982
RPL3	-0.176467	10.0446	43.9462	5.86728e-09
NCDN	-0.392371	9.80892	284.592	5.60209e-27
DNM3	-0.129476	10.8138	245.311	1.24123e-14
BCKDK	-0.0182489	9.75714	4.5135	0.454922
MRPL20	0.123725	9.80883	27.7033	0.00102403
PITHD1	0.17661	9.83532	44.3085	4.60002e-06
ZNF429	-0.0599278	9.83825	5.05712	0.112439
RPS25	0.0439194	10.0003	2.34549	0.181275
UCHL1	-0.105224	9.85341	14.0877	0.00483734
POLR2G	0.0369295	9.78958	3.45901	0.301721
UROS	0.0512795	9.82797	3.9879	0.178531
SRP14	0.102803	10.0241	13.3411	0.00145688
PEBP1	0.052587	10.2307	5.38627	0.0446665
WIPF2	0.206845	9.91953	46.1177	1.62373e-08
ESD	0.126267	9.83356	22.511	0.00100274
PRDX5	0.0746892	9.81919	8.80715	0.0494925
ATAD3A	0.0420539	9.76833	9.45022	0.165764
ENO1	0.189252	9.88358	41.7015	5.40018e-07
CCDC91	0.126974	10.1026	19.5053	2.15487e-05
RPS13	0.174918	9.93196	33.3534	1.19197e-06
BZW1	0.162096	9.85362	34.3435	2.39625e-05
ACTG1	-0.0403924	9.9335	1.96229	0.247649
UQCRB	0.0609084	9.89203	4.30036	0.0990496
MGST3	-0.0361288	9.89661	1.58099	0.319982
TOLLIP	0.00274637	9.80221	0.0149813	0.940939
RAB2A	0.00459975	10.1296	0.0331353	0.87209
SDHB	0.134756	9.82878	26.2901	0.000444243
PSMD4	0.134945	9.84463	24.4006	0.000438625
CYC1	0.0152721	9.79411	0.524076	0.67426
DPF1	0.0238078	9.76864	2.87504	0.436165
PSMB4	0.178112	9.82676	48.1983	3.62058e-06
BBS4	-0.0179162	9.8226	0.492117	0.635986
HINT1	-0.0320611	9.90388	1.21183	0.37429
RPS27	-0.0688359	10.156	7.66878	0.0123767
IRF3	0.0537043	9.77402	11.7644	0.0968717
PRDX6	0.197096	9.82107	58.9126	2.76841e-07
GRM2	0.00240547	9.74593	27.6204	0.630348
MRPS14	0.236459	9.80681	101.776	3.38317e-10
ANKRD2	0.00822124	9.74838	9.54777	0.522979
RTN1	0.10191	10.1466	14.7376	0.00035272
CYFIP2	-0.168763	9.84825	38.1326	5.72515e-06
HSBP1	0.123074	9.84259	20.094	0.0013342
PSAP	0.0893847	10.2191	16.4046	0.000785639
MAP1LC3B	0.13362	9.85783	22.8408	0.000467346
ST6GALNAC4	-0.0109151	9.7497	8.42202	0.493581
RTP1	0.00161508	9.74559	308.014	0.352747
DYNC1LI1	0.0518481	9.86621	3.33662	0.168727
ARHGAP32	-0.0365578	10.1032	1.80834	0.20943
SNRPN	-0.166648	9.80565	50.7562	6.5029e-06
SNX10	-0.0438739	9.75626	28.0428	0.0674212
HLA-B	0.407432	9.80869	287.508	4.57015e-27
TMCC2	0.0610466	9.90548	4.37008	0.094019
NDUFS5	-0.0821757	9.85439	8.97543	0.0280644
RTL8C	-0.161244	9.79541	57.5925	8.84993e-06
APOE	-0.390759	9.93954	180.039	3.83049e-32
BROX	0.00897247	9.91281	0.0961564	0.802905
TRIR	0.0621756	9.83239	5.55883	0.103417
PPA1	0.36814	10.0832	169.093	2.57118e-31
GPRASP2	-0.0422348	9.75273	48.5847	0.040457
SLC29A3	0.100267	9.78297	29.6165	0.00367842
PREPL	0.161186	10.0093	31.2947	1.11274e-06
PDCD2	-0.0363387	9.77624	4.86597	0.274416
LIPA	-0.170145	10.0548	43.0042	1.44235e-08
CMAS	0.0236061	9.8092	0.997692	0.52935
TSC22D1	0.0206104	10.1465	0.607452	0.464339
CALM1	0.0219745	10.4312	1.70349	0.321521
SPINT2	-0.457477	9.87436	290.811	1.83805e-38
NDUFB1	0.00641167	9.82024	0.0650347	0.865576
SH3BGRL3	0.0649348	9.76641	25.4776	0.0268166
RPS7	0.121178	9.9955	17.1395	0.00028503
SPIN3	0.0129311	9.80539	0.2891	0.728831
FSTL5	0.0951353	9.8021	15.5621	0.0104752
RAB1A	0.0968433	9.97722	10.9688	0.00433307
FAM204A	0.0140551	9.87383	0.241635	0.706327
MEG3	-0.0826405	9.91553	7.97962	0.0196436
CRIP2	0.0216366	9.75895	5.18648	0.393219
SF3B3	0.0377008	9.85227	1.88029	0.32017
PKM	-0.112379	9.8292	18.6215	0.00280727
PSMC5	0.00455916	9.81005	0.037649	0.90332
RCN2	-0.16983	9.94916	37.064	4.82371e-07
RPS14	0.00850964	10.0331	0.0925439	0.787413
RABAC1	-0.0960457	9.84664	12.7726	0.0104573
RPS17	0.00480162	9.74867	2.73992	0.724129
SNCA	0.186661	9.98567	34.1967	4.28343e-08
NME4	0.0130506	9.76193	1.40991	0.633513
FBXL16	-0.165325	9.76126	216.998	4.13844e-09
BEX4	0.113078	9.88913	15.662	0.00240246
CALM3	-0.0965655	9.80856	17.0733	0.00952872
ANXA2	0.0459692	9.75682	30.5264	0.0486602
BAIAP3	-0.0313432	9.74797	154.021	0.017502
PPP1R1B	-0.465876	9.78163	656.929	4.57886e-42
ELOB	0.111911	9.86639	15.3109	0.00316001
CNTNAP1	-0.00922532	9.75483	1.61873	0.679217
SNN	0.0083587	9.76113	0.621749	0.756268
RPL12	-0.092703	9.88186	10.4259	0.0112845
C16orf45	-0.0231742	9.88415	0.620781	0.529041
FOXP4	-0.0285549	9.77442	3.2112	0.383085
ALDOA	0.0535428	9.89911	3.32722	0.144009
PSRC1	-0.0556643	9.82888	4.79326	0.140797
HPCAL1	0.0474925	9.78571	5.94227	0.17647
TRIAP1	-0.00994761	9.75653	1.46048	0.676374
FBXL19	-0.0147991	9.77778	0.75849	0.659506
AP2S1	0.140688	9.80154	39.2148	0.000152558
MT1G	0.181822	9.79344	71.7625	5.15747e-07
PAFAH1B1	0.0960349	10.2443	20.6842	0.000228941
DGKZ	-0.00286552	9.78825	0.0208317	0.93579
RABEP1	0.00372422	10.0234	0.0173624	0.90697
SOX15	0.0230841	9.7519	19.4634	0.210381
SRRM3	-0.0479453	9.76269	16.585	0.0896931
EIF1	0.0534377	10.2236	4.85123	0.042655
G6PC3	-0.0612264	9.76543	23.5848	0.0389512
NSG2	-0.385386	9.77892	471.987	7.20385e-30
NSF	-0.537909	9.97476	386.606	8.28566e-67
GAP43	-0.284712	9.77569	282.637	1.41269e-17
DDX5	0.133341	10.2504	41.9103	3.17843e-07
KCND2	-0.0953426	9.85425	11.6776	0.010718
ARPC2	0.0644215	9.84831	5.40743	0.0907702
RPL38	0.150816	9.96918	26.0131	1.23756e-05
WBP2	0.181154	9.91327	39.0641	8.1315e-07
QKI	-0.119101	11.1326	404.316	2.99238e-17
AC016588.2	-0.037833	9.75188	47.5458	0.052941
APP	-0.190997	10.6128	311.4	3.81853e-24
OAZ1	0.212003	9.92043	48.6729	7.03486e-09
RPS4X	0.134428	9.96586	20.895	9.98689e-05
RTN4	-0.131494	10.6602	158.349	1.01811e-12
PPDPF	-0.326605	9.82989	163.375	8.11867e-19
ARF3	-0.07334	9.7825	16.0775	0.0343416
THOP1	-0.0313724	9.78212	2.96401	0.363932
LGALS3	0.00245458	9.75482	0.11507	0.911667
EEF2	-0.0270071	9.94445	0.905337	0.434862
UBL5	0.145836	9.86835	25.6404	0.000124338
CLIP2	-0.14125	10.0839	28.9864	1.36209e-06
PIN1	-0.00516225	9.80253	0.0529242	0.889284
RPL13A	-0.052068	10.0628	3.78917	0.0856373
AL078621.3	0.0159861	9.74753	75.2102	0.124063
RPS11	-0.019406	9.96383	0.451807	0.566846
EPDR1	-0.0754587	9.76247	42.046	0.0076779
ZNF814	0.0418717	9.82905	2.57649	0.271753
ITGB1BP1	0.127099	9.85324	20.4855	0.00089017
GPM6A	-0.00413233	9.95203	0.0209117	0.904242
VSNL1	-0.0673863	9.75733	55.9344	0.00713539
SLC25A4	0.037483	9.83146	2.08715	0.325185
STMN1	0.478931	10.0957	294.967	2.5436e-51
CALM2	0.0352322	10.3122	3.20803	0.148247
PIK3R1	0.0592244	10.2958	8.09648	0.0169337
PRKCB	-0.257605	9.92066	76.4858	7.3301e-14
OIP5-AS1	0.0413316	9.95122	2.00286	0.232987
BCYRN1	0.0126813	9.75608	2.5757	0.583851
RPS27A	0.116681	10.0926	18.3375	0.000108509
DYSF	-0.173375	10.0856	39.9607	2.39692e-09
TMSB10	0.00391566	9.85405	0.0183524	0.917446
MOB1A	0.0920839	9.83785	11.6895	0.0161403
PNMA6A	-0.0282958	9.74699	289.378	0.0080344
IDS	-0.0517911	9.94869	3.14094	0.131143
HS6ST2	-0.0587308	9.75732	43.5416	0.0186136
NDUFA1	0.0344814	9.82725	1.77427	0.364963
FAM199X	0.0565868	9.83923	4.37299	0.138024
TCEAL7	0.0808848	9.8316	9.37483	0.0343844
ARMCX1	0.0193664	9.76415	2.61037	0.497497
PCSK1N	-0.369967	9.83135	206.633	6.74393e-24
RPL9P7	0.00731704	9.75294	1.46556	0.715219
HDHD3	0.0858857	9.76411	54.0885	0.00212189
CTSL	0.119046	9.85919	18.3766	0.00178354
YWHAZ	0.0976045	10.0921	13.1562	0.00117112
SNX16	0.0486644	9.80136	4.63958	0.189133
FABP5	0.1378	9.79038	45.4206	0.000118986
ATP6V1H	0.118664	9.90693	15.357	0.00121129
AC120036.4	0.0522947	9.75141	132.523	0.00198829
PPP2CB	0.236779	9.90264	61.6637	2.32852e-10
DPYSL2	-0.0911962	10.614	70.0016	1.88478e-06
AC090114.1	0.00958562	9.75024	5.59633	0.556829
RUNDC3B	0.0345441	9.76307	8.74536	0.214722
PCLO	-0.17484	9.85009	39.6963	2.50825e-06
CHCHD2	0.13405	9.88668	21.3612	0.000341301
STMN2	-0.12362	9.76322	103.806	1.92606e-05
YKT6	0.000995927	9.76891	0.00519041	0.974201
SOD2	0.0336157	9.88194	1.34154	0.365362
GTF2H5	-0.00419177	9.80089	0.0352054	0.909705
PCMT1	0.0301281	9.91711	1.07027	0.401149
LMBRD1	-0.0134317	9.99833	0.21969	0.680831
RPL7L1	0.0703236	9.82699	7.55373	0.0653694
TUBB2A	-0.126227	9.76981	73.2214	6.41245e-05
CPEB4	0.0860305	10.1699	12.6404	0.00199317
ATP6V0E1	0.112665	9.89472	14.8854	0.00236894
PDP1	-0.0223886	9.76711	2.77926	0.458275
RPL10P9	0.0660717	9.77662	14.3958	0.0457235
SLC6A7	0.00542828	9.74595	152.233	0.246198
CXCL14	-0.053287	9.75444	53.373	0.017823
UQCRQ	0.0610806	9.79846	7.60079	0.0970854
REEP5	-0.084958	9.90726	8.82455	0.0173904
AC093591.1	-0.0117495	9.75106	5.85201	0.514517
GAR1	0.022107	9.7598	5.09721	0.393999
FAM47E	-0.0339607	9.7601	11.2433	0.202662
SEL1L3	0.00632292	9.75232	1.27819	0.743493
SSBP1	0.0675371	9.94549	5.48505	0.0536126
LETM1	-0.0604448	9.79491	8.18765	0.0964977
HES1	0.000435807	9.74958	0.014164	0.977504
NDUFB5	0.067625	9.82901	6.80551	0.0764912
EIF2A	0.0633639	9.78782	10.4153	0.0740812
PHACTR1	-0.203662	10.065	57.4963	5.479e-12
LPP	-0.0644731	10.1203	5.86971	0.0237596
PODXL2	0.00782431	9.7743	0.24108	0.810314
TPRA1	0.0732328	9.77236	23.3401	0.0209141
LSAMP	-0.192189	10.5921	168.698	8.089e-24
RPL14	-0.0455635	9.9516	2.49464	0.183112
CHL1	-0.0403543	9.79575	3.37191	0.268463
ZNF483	0.332848	10.1	145.111	5.37204e-27
XRCC6	0.0790368	9.87605	7.7918	0.0351255
CSNK1E	-0.144985	9.83413	31.3737	0.000109768
LGALS1	0.100577	9.78032	31.557	0.00302602
TIMP3	0.0111816	9.7574	1.64841	0.645156
DRG1	0.102452	9.82289	16.2518	0.00729065
NOL4L	-0.0935976	9.93425	10.535	0.00692785
FTH1P10	-0.373057	9.77175	559.741	1.23747e-30
MTERF4	0.040158	9.79515	3.66957	0.270754
COPS9	0.124599	9.84288	20.1775	0.00116229
PTMA	-0.0408052	10.5452	7.82228	0.0434908
SP100	-0.0213029	9.76294	3.31934	0.450119
SERPINE2	-0.118524	9.7829	39.4015	0.000646652
C2orf69	0.0332386	9.82021	1.72917	0.381043
HIBCH	0.337294	10.2799	192.386	1.13259e-37
KIF5C	0.0733725	10.0739	7.09152	0.0162146
CCDC115	0.0463484	9.77275	9.37823	0.147107
RPL31	0.0585179	9.8461	4.5038	0.124537
MGAT4A	-0.102793	9.94809	12.069	0.00256878
COX5B	0.236646	9.91234	63.2135	1.63404e-10
BCAP31	-0.0753347	9.78928	14.0646	0.034896
RPL13AP25	-0.0320532	9.75262	28.0606	0.114882
HCN1	0.0368187	9.76564	8.30408	0.20677
NUDT4	0.0951281	9.77595	33.5836	0.00369253
TIMM13	0.0292461	9.79162	2.0201	0.417075
LGMN	0.0495712	9.80683	4.39373	0.18555
HIKESHI	0.135391	9.85947	22.848	0.000388778
GRIA3	0.253661	9.85966	73.4044	5.06969e-11
SYT17	-0.0570958	9.7566	45.3059	0.0192451
STARD3	0.00401782	9.78879	0.0404426	0.910274
MTCH1	0.272919	9.95971	84.7021	1.3766e-14
PAPOLG	0.158042	9.85085	31.6511	3.85563e-05
AP003170.4	-0.0147462	9.7465	163.226	0.0873666
EMC9	-0.0141078	9.75291	5.38495	0.488948
TUFM	-0.0530017	9.83126	4.23064	0.160944
VBP1	0.138672	9.8184	30.9632	0.000277548
PSMB5	0.122057	9.82749	22.3881	0.00144428
SBNO1	0.238184	9.95481	61.5981	1.86613e-11
AC064799.1	-0.109066	9.77517	43.1793	0.00098683
HIP1R	0.0473405	10.0152	2.96897	0.143284
CHPT1	0.182117	9.82619	44.9663	2.17713e-06
POLR2D	0.0845295	9.79862	15.0283	0.0217808
DNAJC4	-0.0234081	9.75961	5.55586	0.372522
AL118558.4	-0.0010522	9.74728	0.356381	0.920319
GLRX5	0.0550972	9.78586	8.30027	0.117032
UBE2B	0.503469	10.0816	293.86	1.24179e-54
AL035071.1	0.00879172	9.76136	0.669419	0.745314
B4GALNT1	-0.0191531	9.74842	44.7605	0.165661
RPS29	0.142285	9.99499	23.8932	2.18267e-05
KIF5A	-0.138263	9.79218	43.0451	0.000122951
HCFC1	0.0801479	9.77571	24.4993	0.0144132
RPL21	0.0415503	10.1188	2.54664	0.152339
KLRG1	0.0665826	9.80778	7.66956	0.0760304
PIANP	-0.0716958	9.75246	141.598	0.00053113
NDUFS4	0.133426	9.95436	19.6797	0.000136207
ZFP28	-0.020216	9.77474	1.58194	0.537763
NRGN	-0.351142	9.77633	420.499	9.88944e-26
CCDC82	0.0904249	9.96473	9.95305	0.00853235
GMFB	0.101251	9.80192	20.2336	0.00643051
DYNLRB1	0.128044	9.99251	19.1219	0.000134562
HNRNPC	0.144808	10.3199	56.1309	4.24766e-09
AC113935.1	-0.012823	9.82925	0.239915	0.735328
HSPA8	0.152019	9.97041	25.1913	1.02965e-05
SCAF1	0.0554546	9.79114	7.4902	0.123175
RAD54L2	0.100977	9.91766	11.392	0.00527367
EPHX1	0.023515	9.85205	0.715668	0.534673
ISCU	0.0129351	9.8044	0.319178	0.728297
C2CD2L	-0.0588402	9.76192	27.8784	0.0349964
BRSK1	0.0283051	9.82596	1.24604	0.45668
NSG1	-0.0531324	9.75369	62.3627	0.0146338
VAMP2	0.180146	9.99599	38.0799	8.72708e-08
TPM3	0.0846277	9.83349	10.2839	0.0269435
GSTM3	-0.0119779	9.75732	1.88986	0.62475
SLIT1	-0.0224634	9.75525	8.59555	0.326101
EIF1B	0.173977	9.85343	37.9616	5.94341e-06
TTC3	0.0293417	10.2965	2.19648	0.234263
RPL18	0.178167	10.0991	43.2927	3.78936e-09
CCT3	0.281501	9.92205	85.7559	2.30977e-14
CSNK2B	0.0118484	9.77675	0.491458	0.721716
ASPHD1	0.033283	9.78194	3.42373	0.333735
PCSK2	-0.200919	9.76838	198.191	1.31557e-10
ZNF271P	-0.0257219	9.88743	0.78223	0.48333
HIGD1A	-0.00520256	9.76432	0.18355	0.856688
NDUFB8	0.00583984	9.79424	0.0765401	0.872335
TIPIN	-0.0450092	9.78834	5.07533	0.206017
AFG3L2	0.126822	9.8235	25.3637	0.000916345
RPL9	0.124758	10.026	19.4148	0.000114378
CRYAB	0.264611	10.5433	140.172	2.95383e-32
NDUFS2	0.183426	9.88509	39.6442	1.13602e-06
SARAF	0.0984831	10.0301	11.9683	0.00213656
MORF4L1	0.276657	10.0244	95.4166	6.77964e-17
S100A6	0.611982	9.86295	409.701	2.68623e-53
RPL13AP5	-0.122936	9.7562	204.107	6.09873e-07
AC024293.1	-0.0833899	9.76844	34.6177	0.00709056
CCK	0.0210595	9.75019	27.1857	0.185585
YAF2	0.110701	9.93585	12.5124	0.0018529
USP14	0.104997	9.98917	13.3144	0.00174892
ERI3	0.0662562	9.97888	5.17756	0.0495522
RSU1	0.0517397	9.89024	2.92449	0.16137
SARS	0.130032	9.8959	19.9498	0.000457464
RPS21	0.138927	9.95411	20.9052	7.24629e-05
AKR1A1	-0.0396401	9.7913	3.77802	0.270595
APH1A	-0.0639031	9.77405	16.4632	0.0508405
CDC5L	0.248945	9.89024	71.9048	4.62542e-11
PMVK	0.183567	9.80412	64.3268	9.20194e-07
ATP6V0B	0.0533989	9.8929	3.36395	0.147447
SNX7	-0.112859	9.77542	45.9681	0.000669825
ERCC1	0.132407	9.80243	33.7867	0.000375159
RSL1D1	0.120464	9.79411	32.8062	0.000918331
ARFIP2	0.0714749	9.76838	27.7483	0.0178481
OSCP1	0.0132844	9.75848	2.07584	0.596496
PGAM1	0.0671692	9.82373	6.93714	0.0779506
HSPA9	0.420075	9.945	183.705	2.58627e-30
TOP2B	0.0414838	10.0482	2.26457	0.183631
RTN4R	0.00315295	9.74667	7.17041	0.706036
PPP1R12A	0.0556831	10.0549	4.09876	0.0728621
OPTN	0.0628839	9.84244	5.24303	0.0992973
ADCK1	-0.0526777	9.82687	4.2932	0.163368
CKB	0.181317	10.0696	43.4993	5.92978e-09
PHKG2	0.0923478	9.76882	45.9984	0.00224492
TOMM20	-0.0601743	9.93107	4.45179	0.0850201
PRAF2	-0.0711524	9.76619	29.7758	0.0178182
HK1	0.0183652	9.76546	2.11202	0.52947
TRUB1	0.0152398	9.79563	0.504626	0.676301
TALDO1	-0.11499	9.91764	16.9869	0.00108654
LAMA4	-0.0738786	9.76386	37.1634	0.0108212
CDC42SE2	-0.0496225	10.1549	3.97761	0.0725427
SUPT16H	0.168022	9.86142	35.1567	1.12055e-05
MRPL32	0.0718061	9.78483	14.5772	0.0398895
SAP18	0.171076	9.83897	40.288	8.99942e-06
VDAC2	0.16233	9.8407	35.8447	2.48226e-05
SPCS1	-0.0540894	9.81917	4.93269	0.151237
RPS24	0.126369	10.0325	19.5067	8.36341e-05
PACSIN2	0.10339	9.83096	15.0279	0.00694145
AARS	0.188996	9.8932	41.2734	4.52476e-07
CCDC186	0.115858	9.84178	17.8989	0.00251162
TIGD5	0.00206855	9.75577	0.0720218	0.928414
GREM2	-0.0536284	9.74983	169.536	0.00162895
BORCS8	0.108521	9.76838	66.146	0.000284732
CHGA	0.00318672	9.75194	0.352272	0.866112
SLC7A8	-0.0247446	9.75272	16.8238	0.223831
GTF2A2	0.104101	9.81515	17.931	0.00609132
AC245140.2	-0.00801807	9.75007	3.95198	0.626748
SCRN1	-0.071681	9.84975	6.94271	0.0562694
PHF21A	-0.0385791	10.2008	2.62984	0.145686
OTUB1	0.0125561	9.78304	0.464783	0.717326
BORCS7	-0.0903206	9.80427	15.7614	0.0147637
SYNGR1	-0.0712194	9.78817	12.8425	0.0452166
RPS15A	0.00126872	9.84945	0.00212365	0.973238
NUS1	0.000276649	9.82501	0.000116495	0.99417
LMAN2	0.00353602	9.80313	0.0245864	0.924128
CA10	-0.200343	9.7541	704.9	1.27033e-17
GNAS	0.0242158	10.0316	0.767089	0.444543
SCAMP5	0.123822	9.82612	22.5287	0.00122471
KIF1A	0.175525	9.92807	34.7275	1.21031e-06
NR2F6	-0.0498947	9.76251	19.0738	0.0765265
RPL28	-0.124362	10.0585	20.867	3.61196e-05
NME3	0.0975472	9.85278	12.7195	0.0105464
RPS2	0.0431778	10.0624	2.49643	0.160211
SYNGR3	-0.0252899	9.7498	40.458	0.123777
ZNF385A	0.0290205	9.74989	63.9386	0.0551807
METTL9	-0.0908802	9.80385	15.7684	0.0140923
MCOLN1	0.0154978	9.78021	0.779296	0.649424
TSC1	0.137144	9.97474	22.1054	6.16798e-05
TERF2IP	0.0655821	9.98182	5.23821	0.0511408
ACTR2	-0.0349554	9.89699	1.47397	0.335863
NLRP1	-0.0491677	9.77103	10.9057	0.1216
PFN1	0.116933	9.81125	23.1273	0.00197892
FAM49A	0.0461654	9.79893	4.17499	0.210251
C1QBP	0.136585	9.79529	41.5453	0.000181722
LDLR	0.0441798	9.79414	4.18476	0.224214
Z74021.1	0.00153118	9.74721	0.810751	0.880684
TXNDC17	0.0333415	9.76881	5.79032	0.275734
KRT10	0.15748	9.82455	37.0081	4.03101e-05
ZFP82	-0.0683507	9.82398	7.11478	0.0699785
TUBG1	-0.0157968	9.75516	4.53288	0.486572
SUV39H1	0.0250183	9.75051	35.8467	0.125573
CACYBP	0.490827	9.93938	225.986	1.26463e-39
PRMT1	0.0623269	9.81004	6.88643	0.0977849
HDAC5	0.0246982	9.89368	0.732142	0.501043
TCEAL5	-0.0646174	9.76154	34.1167	0.0198149
SEC62	0.00116203	10.0502	0.00183189	0.970037
MYDGF	-0.0417323	9.79698	3.79298	0.253978
NAA10	0.0462523	9.78172	6.38477	0.178326
FXYD6	-0.0516115	9.75315	65.4835	0.0148531
ZNF470	-0.063513	9.77901	12.9714	0.0613903
GAS7	-0.204079	10.1205	62.7732	2.62911e-13
METTL23	-0.0361246	9.78622	3.52126	0.305797
ITM2B	-0.136182	10.1596	33.7276	5.25086e-07
CES4A	0.00447643	9.90955	0.0249748	0.901113
IER3IP1	-0.055519	9.76237	23.9943	0.0484158
RPL10	-0.0253958	10.1478	1.03307	0.363164
GCA	0.0613512	9.93557	4.59259	0.0825514
ST8SIA3	-0.0770407	9.76024	52.6031	0.00441548
ABHD17A	-0.223389	9.8397	75.1399	1.80406e-09
CHML	-0.0114186	9.75414	2.78264	0.598075
LSM7	0.0994526	9.79049	23.7116	0.0055472
RPL36	0.203212	9.97036	45.9733	4.80732e-09
DYRK1A	0.0907659	10.2314	15.4981	0.000568618
ILF3-AS1	0.0696595	9.83012	7.19554	0.0681506
ASNA1	0.0227385	9.76941	2.58458	0.461549
HSDL1	-0.043589	9.77947	6.21141	0.200171
IER2	0.0619491	9.76033	38.1886	0.0165345
VSTM2B	-0.531367	9.83345	431	4.33467e-49
COX7A2L	0.0222536	9.83084	0.731052	0.558637
C19orf53	0.0625488	9.81477	6.42835	0.0984446
TECR	0.155486	9.97645	28.1017	5.65959e-06
DDA1	0.0492834	9.77473	9.54076	0.130386
RPL18A	0.0325417	9.99196	1.22751	0.325569
SYMPK	0.0640328	9.90122	4.91843	0.0803656
TMEM59L	-0.0734095	9.78806	13.2875	0.0389116
TRIM37	0.101683	9.86584	12.1864	0.00727531
PPP1R37	0.0326388	9.75734	14.8389	0.173139
ANKMY2	0.123808	9.80418	27.8584	0.000919789
PNMA8A	0.0655921	9.76625	27.5426	0.0249032
PNMA8C	-0.00945439	9.75828	1.07599	0.707416
TMEM160	0.0338166	9.79489	2.56776	0.353295
FTL	0.0599438	10.5055	12.7838	0.00455223
C2orf68	-0.0363334	9.86064	1.73136	0.331994
SIK3	-0.277744	10.9026	1379.73	3.16274e-71
SLC17A7	0.0212857	9.74697	284.057	0.00831726
GTF2I	0.103561	10.2589	26.2167	5.84053e-05
KLK7	0.0030824	9.74567	370.164	0.199023
TAPBP	-0.0792922	9.82392	9.88761	0.0353771
PEA15	0.203995	9.87517	48.4507	8.37482e-08
COX4I1	-0.124733	9.8933	19.2563	0.000540367
SUPT7L	-0.00917644	9.78928	0.212188	0.797286
RPL9P9	0.0702661	9.77569	18.2694	0.032113
URI1	-0.0548645	10.1455	4.51703	0.0489383
C1D	0.0772385	9.82692	8.83304	0.0430818
WASH6P	-0.107022	9.76321	80.1886	0.000207017
RPL39	0.190587	9.90348	38.7554	2.82963e-07
COX7B	0.170911	9.83676	40.3944	9.17095e-06
SYN1	-0.0729557	9.76037	47.0775	0.00713066
SLC25A6	-0.0658279	9.81931	7.15147	0.0804531
ASB6	-0.0235517	9.76718	3.10737	0.435799
FRRS1L	-0.190858	9.7879	91.0567	7.32833e-08
DIRAS2	-0.0352732	9.7578	14.8071	0.159887
RORB	0.0848712	9.80831	11.0603	0.0239504
WASHC1	-0.0423408	9.80678	3.41142	0.256042
ENY2	0.16271	9.84822	34.1352	2.31496e-05
PLGRKT	-0.0890719	9.83589	11.0302	0.0180501
NEFM	-0.0717863	9.76372	34.8563	0.0130327
RHEB	0.25668	9.87541	75.1848	2.01012e-11
FAM3C	0.0879185	9.82709	11.2213	0.0214102
RPS3AP26	-0.00852159	9.74738	19.2372	0.44203
RPS3AP25	0.0434383	9.75273	58.578	0.0224364
BEX3	0.0587946	9.87352	4.19177	0.116929
APTR	0.105734	9.81658	17.4762	0.00540794
C7orf50	0.141748	9.8175	31.8876	0.000200431
PRKAR1B	-0.118275	9.77301	55.9566	0.000278657
C6orf203	0.0453539	9.78244	6.16593	0.188865
HMGN3	0.129544	9.9576	19.7349	0.000200157
BEND6	-0.196182	9.80249	71.6045	9.20655e-08
CUTA	-0.0132305	9.81947	0.275252	0.726359
QRSL1	0.0619246	9.82973	5.63116	0.104677
MCUR1	-0.00579752	9.79045	0.0802658	0.871643
LYRM4	-0.0373052	9.873	1.60265	0.31473
ECI2	0.0683633	9.77797	16.4188	0.0408409
AC140125.2	-0.00546102	9.74673	17.207	0.546007
PDLIM7	-0.0299556	9.74867	93.7744	0.0398055
KIAA1191	-0.0185834	9.77714	1.23595	0.578385
AC139491.1	-0.00203665	9.74677	2.3746	0.821151
LNPEP	0.0320091	9.99902	1.24028	0.329764
KIF2A	0.00758713	10.1157	0.0880181	0.793399
MAP9	-0.042584	9.78389	5.1576	0.222256
RPS3A	-0.0541249	9.96652	3.51788	0.107479
CCNI	0.0475717	10.0112	2.75866	0.143085
PGRMC1	-0.101002	9.91099	12.8398	0.00445015
TMEM165	-0.0126475	10.7452	1.75425	0.478621
OPA1	0.16087	9.96325	28.5529	3.72586e-06
PFN2	0.00127926	9.81969	0.00259153	0.973038
ATP1B3	0.125429	9.85601	18.5549	0.00102327
ZCCHC10	0.178392	9.79512	70.4023	9.86469e-07
COX17	0.0911658	9.81416	13.7469	0.0161197
ZNF786	-0.0132007	9.76709	0.982921	0.661319
PSMD6	0.0510648	9.79813	5.53667	0.164971
SEC13	-0.147735	9.80864	40.4421	6.93149e-05
BRK1	0.0424773	9.81035	3.12473	0.258879
CRELD1	0.0161123	9.79794	0.533817	0.660901
MLC1	0.094906	9.75973	100.151	0.000143403
CD99L2	-0.16922	9.91152	34.5531	1.50792e-06
SNU13	0.036063	9.81514	2.15914	0.340142
UQCR10	0.0975396	9.83213	13.2983	0.0108479
XBP1	-0.0221361	9.7701	2.30832	0.480003
S100B	-0.164481	10.0297	37.372	9.87324e-08
PIGP	-0.0329173	9.80079	2.15082	0.372504
SLC13A3	-0.262048	9.90972	84.3378	5.32053e-14
RBM39	0.172226	10.2694	72.5362	2.56002e-11
MAP1LC3A	0.252684	9.83778	86.134	7.22392e-11
CST3	-0.229771	9.90075	60.0097	7.65508e-11
MORF4L2	0.358089	9.96667	135.205	8.68092e-24
COPS7B	0.030592	9.81277	1.63803	0.417161
SRI	0.044721	9.82925	2.95486	0.240592
PPP2R2C	-0.262892	9.85161	90.5634	8.56408e-13
MZT2A	-0.0637968	9.79246	9.44409	0.0772197
HSPE1	0.619655	9.95416	339.493	8.87378e-62
MZT2B	0.0154452	9.82605	0.363547	0.684358
RMND5A	0.107362	10.0088	13.9225	0.0010832
PPP3R1	-0.0454667	9.76746	11.3743	0.135249
MAPKAPK5-AS1	0.117248	9.77931	45.8629	0.00048682
ATP2B1-AS1	-0.0592389	9.75365	78.0446	0.00657105
SEZ6L2	0.0743524	9.80396	10.306	0.0461575
RND1	0.00985105	9.74743	29.4679	0.345238
RPL41	0.0336954	10.1061	1.59444	0.251096
IGSF21	-0.102056	9.75709	129.237	4.97769e-05
MAGEH1	-0.154969	9.79724	52.3427	2.12324e-05
RPL5	0.159546	9.9845	29.6771	2.66425e-06
SYT10	-0.0307372	9.74845	109.884	0.0300554
ST13	0.567295	10.0809	360.835	1.7684e-67
EVL	-0.0693716	9.85759	5.94889	0.0635654
SECISBP2L	0.0398318	10.2777	3.62544	0.11248
ENO2	-0.056294	9.82262	4.9473	0.135787
AC215219.1	-0.00690082	9.81349	0.0830338	0.854602
APLP2	0.222586	9.926	52.4631	1.02957e-09
MAOB	0.0375457	9.76095	12.7624	0.157073
RPA3	-0.021296	9.76074	4.13051	0.429396
THY1	-0.296332	9.77594	308.85	7.4395e-19
ISY1	-0.000937921	9.75848	0.0102104	0.970368
ATP1B1	-0.0228999	10.4324	1.84116	0.297354
WIPF3	-0.131045	9.76144	135.043	3.00365e-06
CHORDC1	0.647637	10.147	408.232	4.37287e-90
HACD3	-0.0122282	9.8988	0.177804	0.736622
COA5	0.0376754	9.80469	2.72262	0.312341
PLEKHB1	-0.0911354	9.98277	10.9837	0.00553514
TMEM147	-0.0794149	9.78478	17.5602	0.0234772
PEX16	-0.0118956	9.78772	0.377377	0.737561
GSTP1	0.142286	9.87886	24.288	0.000160615
AQP4	0.416852	9.85871	188.671	2.19534e-26
BDNF	-0.0112538	9.74794	22.0088	0.370123
2022-09-04	-0.386899	10.0422	239.994	2.41145e-39
AC116533.1	-0.0182574	9.75745	4.14332	0.459097
PSMB7	0.155568	9.89164	28.4478	3.12715e-05
PPCS	-0.0397991	9.76906	8.09479	0.199685
ATP6V0D1	0.173459	9.8237	46.6323	6.18387e-06
SYT1	-0.0570943	9.93404	3.91162	0.101238
DCAF10	-0.0533778	9.78966	7.10446	0.135618
DKK3	-0.465617	9.80339	428.553	4.42527e-38
NUDC	0.365412	9.90395	143.963	5.34688e-22
EIF4A2	0.107689	9.95037	13.3554	0.00209322
RPLP2	0.0746566	10.0097	6.6565	0.0222882
CEND1	-0.0854093	9.76474	46.7747	0.00374193
INPP4A	0.0711628	9.81644	7.85617	0.0606381
PRPSAP2	0.0120545	9.90466	0.173924	0.73951
TRMT112	0.235525	9.81744	86.5758	7.7177e-10
ADPRHL2	0.041725	9.78391	4.97885	0.230695
RPL34	0.0891715	10.0083	9.39188	0.00653318
PLGLB1	-0.0664777	9.7795	14.0268	0.0509729
SSU72	0.0981105	9.85177	12.6144	0.0101439
SLC2A11	-0.0500403	9.77354	10.1562	0.12411
CHCHD5	0.0445853	9.76482	13.4243	0.120288
PSMB2	0.0884032	9.84563	10.4427	0.0206873
SLU7	0.145699	9.82538	32.0112	0.00014478
NCSTN	0.0456718	9.80892	3.76848	0.223946
KIDINS220	0.0461805	10.2454	4.74712	0.0738153
CHD4	0.0499913	9.9485	3.05958	0.150809
CCNY	-0.107748	10.3185	29.7258	5.41526e-06
TBR1	0.000399077	9.74567	3.87363	0.902572
SVBP	0.0152829	9.75966	2.42169	0.555327
SMIM20	0.0398712	9.77333	6.61787	0.21539
RPLP1	0.0387239	10.2132	2.53287	0.144697
GTF2IP12	0.0987888	9.81149	17.2867	0.00893035
DENND6B	-0.0103397	9.75232	3.3315	0.598503
NCL	0.326367	9.954	124.319	1.03845e-19
WASH2P	0.0161498	9.77429	1.03799	0.619957
MTFR1L	-0.0616464	9.77814	12.9867	0.0678029
NT5DC1	-0.0579649	10.1471	5.23439	0.0370994
COL9A3	-0.197837	9.79975	83.4467	6.23537e-08
PSMA4	0.0846248	9.81295	12.2767	0.025263
NACA	0.109187	10.0003	14.049	0.000994257
C4orf48	0.052821	9.91659	3.21696	0.142427
TYROBP	0.00495755	9.75372	0.578296	0.813101
SEC31A	0.147387	9.98975	25.1393	1.24474e-05
PLEKHB2	0.167059	9.853	35.9964	1.35816e-05
RPL29	0.0385731	9.96055	1.71765	0.26063
GALNT18	0.096768	9.78492	24.1187	0.00558802
ANAPC11	0.122468	9.81381	24.8858	0.00124445
PHACTR3	-0.134125	10.4279	62.1732	5.87432e-10
ATP9A	-0.0876874	10.1395	12.9811	0.00166118
RPS3	-0.0134544	10.0235	0.229303	0.671867
WASH7P	0.00650572	9.82866	0.0642517	0.863998
GPN2	0.047081	9.77729	7.9448	0.157555
GUK1	-0.0662229	9.87553	5.49597	0.0727546
LDHA	-0.0336496	9.77894	3.64705	0.32082
NEDD4L	-0.105332	9.99172	12.3293	0.00117425
ACOT7	0.0917319	9.80297	15.7566	0.013752
CLSTN1	0.0621647	9.91471	4.44341	0.0852718
ATP1A2	0.143048	9.81674	30.514	0.000173303
PRKACB	-0.00991396	10.4174	0.336144	0.656114
VPS26B	0.0286097	9.81067	1.43737	0.446841
RGS7	0.150035	9.91469	24.6545	4.01239e-05
DDX20	-0.0128862	9.75775	2.07746	0.603864
POMP	0.0949899	9.83815	12.4808	0.0130986
MRPL12	0.00993596	9.75537	1.77962	0.659359
STK25	-0.070807	9.80046	10.362	0.0545464
PPAN	-0.00400339	9.75093	0.740518	0.820919
SYT11	-0.122931	10.1599	27.421	6.15365e-06
MACROD2	-0.301354	10.0537	124.679	1.55943e-24
TIMM10B	0.0253586	9.79575	1.45596	0.487455
CA11	-0.0651846	9.7604	38.3636	0.0160683
COX6C	0.0357583	9.87744	1.5537	0.337553
AL445433.1	-0.00190446	9.74585	20.7853	0.697058
C1orf61	-0.104045	9.85783	13.7964	0.0052151
LGALS8	0.0791189	9.77461	25.1909	0.0146888
RAN	0.186178	9.81704	54.6024	1.08755e-06
MFN2	0.041327	9.81147	2.99845	0.272627
PCDH9	-0.212639	11.271	1126.75	1.11918e-60
LINGO1	0.0556322	9.95149	3.18639	0.108952
CREM	0.046178	9.83287	2.88902	0.225866
KCNJ6	0.0294362	9.7504	52.5601	0.0659468
EIF4G3	-0.081673	10.4677	30.2388	0.000117455
ARF1	0.010763	9.88221	0.14495	0.771288
RPL24	0.108642	9.99816	13.9885	0.00108153
HPCA	-0.345444	9.76782	596.28	2.30384e-28
CIRBP	0.0334247	10.0247	1.49282	0.295423
MYO10	0.346196	9.93597	130.349	3.8449e-21
MDH1	-0.0327239	9.81456	1.82636	0.384434
HMGB1	0.126529	10.3716	45.8502	8.13697e-08
C6orf106	1.21969e-05	9.84274	2.03808e-07	0.999736
FO538757.1	0.0233868	9.7614	4.84081	0.385686
GDI1	0.0578408	9.87674	4.1111	0.121993
SLAIN1	-0.0550518	10.6633	22.3347	0.00315418
SLITRK5	-0.226875	9.82089	78.6581	1.06629e-09
CDC16	0.193128	9.9061	42.9512	1.84653e-07
CAMK2B	-0.132194	9.7802	51.91	0.000113761
ASCC1	0.0757875	9.95194	6.4483	0.0293724
NDRG2	-0.0549326	10.2027	5.39396	0.0374826
EAPP	0.260335	9.86603	81.7795	1.39114e-11
RPL36AL	0.269084	9.86752	84.536	2.83867e-12
RAB15	0.0137205	9.74926	17.3552	0.343457
GPI	-0.122337	9.9317	17.6333	0.000410817
SMARCD3	-0.0513376	9.77062	12.079	0.104554
PCNX1	0.0520515	10.1569	4.46255	0.0632476
CABP1	-0.042294	9.75	99.7144	0.0132754
FASN	0.0144208	9.7815	0.648783	0.674828
SLC48A1	-0.294647	10.1495	154.766	3.27738e-28
APBA2	-0.281727	9.90931	97.6535	5.23931e-16
RAB11A	0.0283727	9.81885	1.29595	0.45407
GOLGA8A	0.144169	9.8191	32.805	0.000159327
SRSF8	0.0119534	9.79543	0.316853	0.743154
MAP1A	0.0686614	9.92274	5.42088	0.0555053
PCBP2	0.0615376	9.95216	4.59687	0.0762723
SERF2	0.190474	9.94392	38.9154	9.08442e-08
NBR1	0.0212307	9.90624	0.540422	0.558019
SCG3	-0.158837	9.76825	124.455	3.35334e-07
SLC8A1-AS1	0.0165663	9.76274	2.03477	0.551378
RTL10	-0.0171275	9.76505	1.90123	0.558038
ARPP19	-0.0289591	9.95559	1.00882	0.396474
RNF135	-0.0407339	9.75749	21.0223	0.102114
COX5A	0.05635	9.8029	6.12531	0.129705
MBTPS1	0.105158	9.92093	12.9194	0.00357459
TSPAN3	-0.120153	9.85639	19.2482	0.00124437
SH3GL3	-0.22639	10.6534	320.889	2.35913e-35
OCIAD1	-0.0459376	9.99164	2.69127	0.160584
MESP1	0.0282689	9.75131	35.9237	0.105713
SEC14L1	-0.095533	9.91068	10.8205	0.00719683
SFT2D1	0.0878619	9.892	9.26485	0.0177067
HCFC1R1	0.12284	9.78631	39.6571	0.000472368
EIF1AX	0.573232	9.96221	350.849	1.37104e-54
HES6	-0.0401879	9.78035	5.17211	0.240098
TCF25	0.294347	10.0222	102.06	9.40685e-19
YPEL3	0.147383	9.91911	24.6282	5.04564e-05
NDUFAF2	0.0863032	9.98355	7.80665	0.0103539
ATP1B2	-0.0507413	9.8055	4.49139	0.172465
HNRNPL	-0.143064	9.93421	25.481	3.2605e-05
COPRS	0.120929	9.78707	38.2373	0.000608548
UROD	-0.0638311	9.76526	25.6611	0.0310012
DHX36	0.12913	9.95474	18.8834	0.000219189
KRT222	-0.0169062	9.74655	195.266	0.0577741
PSMD8	0.0874058	9.83601	11.1637	0.0223549
USP39	0.0816734	9.8089	12.0035	0.0299147
IFIT1	0.145685	9.77438	88.8171	5.36196e-06
ADAM11	0.000634896	9.74906	0.0386441	0.96511
RAB40B	0.0127015	10.1414	0.265631	0.653039
CHCHD10	-0.077516	9.77705	20.4853	0.0207571
TBCB	0.1258	9.90517	18.9311	0.000621628
CTXN1	-0.250282	9.76793	310.936	1.04987e-15
MRPL34	0.0458041	9.77399	8.38242	0.157046
AC074033.1	0	9.7455	0	1
U2AF1L4	0.0576038	9.76479	22.6664	0.0438289
NUMBL	0.00831866	9.76325	0.509436	0.767661
ATP1A3	-0.0606352	9.75592	55.0295	0.0111156
SNRPD2	0.0433132	9.79271	4.27346	0.231229
MCRS1	-0.03857	9.77463	5.79575	0.23997
HS6ST3	-0.0550532	9.79844	6.03861	0.13352
ATP6V1D	0.1181	9.82336	21.703	0.00200797
FAM213A	-0.0059673	9.79544	0.0771088	0.870005
TFPT	0.024637	9.76927	3.02565	0.424035
GHITM	0.0321818	9.80823	1.8756	0.390723
SMARCB1	0.0907599	9.82137	13.0583	0.017264
DTNB	-0.160392	10.1171	39.2172	1.26993e-08
FUNDC2	-0.000269353	9.79762	0.000153929	0.994142
LINC01278	0.0342655	9.87659	1.2954	0.35835
ATP6AP2	-0.0685278	9.85671	6.34424	0.0670284
GPM6B	-0.152719	10.8727	335.324	3.37226e-21
TMEM141	0.0852348	9.77289	32.4742	0.00741348
OLFM1	-0.0241306	9.75478	10.8368	0.282543
RPL7A	-0.0350978	10.0081	1.54377	0.275774
TUSC1	0.0297481	9.76852	4.66472	0.329209
ZNF7	0.0249128	9.79246	1.45557	0.490662
BAALC	-0.0828874	9.82962	9.86894	0.0279375
C8orf37	0.0504946	9.7527	84.9259	0.00730017
C8orf59	0.161269	9.804	49.8473	1.59883e-05
RPL7	0.0599158	9.93752	4.11798	0.0892735
PSD3	-0.0558912	10.354	8.30959	0.0160671
MICU3	-0.0952811	9.9729	10.89	0.00410114
NDUFB2	0.0926382	9.87502	10.3141	0.0137523
AKR1B1	0.0756152	9.7865	15.2622	0.0319015
ZC3HC1	0.0290319	9.78017	2.65473	0.393977
PSIP1	0.0214162	10.1116	0.681594	0.462477
VGF	-0.0137535	9.75658	2.68394	0.565194
PPP1R9A	0.00560353	10.2298	0.0568596	0.829625
LIMK1	0.00737443	9.75858	0.634907	0.770078
2022-09-07	-0.159797	10.8321	440.043	4.07303e-22
RPL21P75	-0.00205328	9.74644	4.03541	0.792895
PHF14	-0.0167848	10.1748	0.463833	0.537915
SASH1	0.0484554	10.3281	5.83104	0.0444417
CDC40	0.196535	9.9335	43.4231	5.02768e-08
MAP3K7	0.175958	9.96976	35.7134	3.67939e-07
FIS1	0.096602	9.93999	11.2765	0.00626541
TBCC	0.0248082	9.76249	5.00234	0.368682
RUFY1	0.0573938	9.87414	4.00987	0.125661
PJA2	0.0665913	10.0923	6.35591	0.0260467
COX7C	0.134181	9.89928	20.1731	0.000288128
SKAP2	-0.0138899	9.79116	0.430048	0.699409
RPL37	0.118942	10.0175	16.9662	0.000264128
SPARCL1	0.0865783	9.99026	8.28115	0.00958351
HOPX	-0.0372515	9.75392	29.9374	0.0874342
PAICS	0.0153652	9.85515	0.3045	0.684234
SST	-0.0761035	9.75743	70.2125	0.00252498
ZBTB38	0.00516749	10.0079	0.0329287	0.873297
C3orf18	0.00636889	9.75301	1.14726	0.751976
HMGB1P5	0.0605796	9.79477	8.11581	0.0963042
RBMX	-0.0254562	10.0442	0.868128	0.411806
INPP5J	0.00063706	9.74677	0.243117	0.942666
UFD1	0.0902518	9.81935	13.0775	0.0177389
SH3BGR	-0.0969875	9.80431	17.5361	0.0088233
CSE1L	0.0449517	9.91955	2.38851	0.210057
YWHAB	-0.0468327	9.95948	2.67427	0.167435
COMMD7	-0.0572897	9.77294	13.6365	0.0768777
ABHD12	0.11191	9.95219	14.538	0.00136598
PAK5	-0.0594437	9.84105	4.6423	0.115111
ILKAP	0.186163	9.98885	41.9406	4.1744e-08
C2orf80	-0.042291	9.74814	241.329	0.00216927
FAM171B	-0.00506399	10.0265	0.032124	0.873001
DHFR2	0.0122998	9.76992	0.747711	0.692716
HSP90AA2P	0.0649995	9.75874	48.5039	0.00832514
PPP2R5E	0.0697646	10.0112	5.53388	0.0323048
CCM2	-0.0585509	9.90947	3.9438	0.101574
RAB27B	-0.0241027	9.74983	36.0391	0.143013
TRAPPC6B	0.132048	9.84083	23.8264	0.000584206
ERH	0.0870937	9.83892	10.7275	0.0228118
AC016739.1	-0.0177395	9.75291	8.0935	0.385531
RSRC2	0.293419	9.95172	96.2723	2.72301e-16
ST6GALNAC5	-0.313934	9.76832	457.143	1.61506e-23
UNC80	-0.261435	9.77038	292.213	3.04796e-16
KCNG1	-0.00930955	9.74703	33.1569	0.359185
KCTD10	0.128133	9.77701	61.0794	0.000100193
COX6B1	0.122294	9.84997	19.0165	0.00139916
STMN3	-0.0671835	9.77367	17.7892	0.0394594
DAAM1	0.0595624	9.89153	3.92424	0.10685
LINC01821	-0.00609812	9.74607	82.6968	0.343247
TUBA1A	-0.349983	10.2362	276.903	2.14719e-46
RPL13AP20	0.000518304	9.74643	0.273961	0.945819
ZFYVE21	0.00361258	9.79301	0.0304646	0.920513
CPNE9	0.0436099	9.75378	46.4446	0.0317416
MFSD6	-0.150262	10.0251	30.6743	1.34123e-06
PRKCA	0.00215692	10.1801	0.00709615	0.936822
CCNQ	0.299067	9.82089	144.593	8.52511e-15
SMAP1	-0.0367023	9.91332	1.50348	0.304148
GABARAPL1	0.0628263	9.8244	6.1196	0.0991967
SPRYD7	-0.0500841	9.82929	3.73873	0.185332
CIR1	-0.021955	9.93546	0.564406	0.529901
PGM2L1	0.0261765	9.77243	2.80372	0.412592
MRPS21	0.0710232	9.79825	10.5449	0.0536146
CPNE4	0.103062	9.77007	51.5469	0.000778483
PRR13	-0.05005	9.7723	10.7893	0.119754
OXCT1	-0.0555699	9.83828	4.10529	0.141205
CHP1	0.0283658	9.83194	1.17159	0.456208
NAP1L1	0.0308195	10.0679	1.28537	0.312485
FKBP2	0.0149482	9.86967	0.273058	0.689618
CDC123	0.139394	9.8226	30.0432	0.000269872
SELENOH	-0.0277446	9.75935	8.00641	0.288076
TMCO1	0.0672717	9.85162	5.95122	0.0770468
TMED2	-0.00803852	9.83256	0.0964089	0.832283
PAK1	-0.113189	9.90826	14.05	0.00145564
SLC7A10	0.000269394	9.7466	0.0573222	0.974015
WAC-AS1	-0.017187	9.80442	0.567387	0.643966
MRPS36	0.161753	9.80467	48.8803	1.55077e-05
SLC1A2	-0.0112298	9.92659	0.137082	0.750546
POGZ	-0.0301961	10.2738	2.20515	0.225293
RPL15	0.0762224	10.0538	7.66651	0.0144885
CAPN1	-0.0343175	9.76274	8.92939	0.223399
RGS4	-0.018127	9.748	52.1105	0.160214
NUDCD3	0.0344767	10.0083	1.44413	0.289141
JAZF1	-0.419287	10.0407	231.306	3.53687e-46
PHPT1	-0.0253427	9.81068	1.1203	0.499141
THAP6	-0.0561015	9.86117	4.0725	0.133179
LAMTOR5	0.0343608	9.79715	2.50773	0.348722
CNPY3	-0.035431	9.77537	4.80019	0.28324
PVALB	0.00429047	9.74619	36.1681	0.491585
FAS	-0.00288764	9.74784	1.63372	0.810589
INPPL1	-0.0370969	9.76158	11.574	0.178403
AK5	-0.102904	10.4562	35.9189	1.38025e-06
CCND2	-0.0061639	9.75525	0.674178	0.785617
ATP1A1	-0.0138441	9.89734	0.224291	0.703703
HAX1	0.0693391	9.79687	10.5105	0.0585717
CAMSAP2	0.120862	10.1139	20.3224	4.26086e-05
DNAJC5	0.038752	9.84568	2.00248	0.308217
PTGES2	0.0263439	9.76533	4.56806	0.36517
NDUFAF5	0.114932	9.79994	26.8115	0.00188879
NAXE	-0.0423501	9.77224	7.63811	0.187447
SNRPD1	0.219753	9.81051	83.9364	6.71538e-09
SH3D19	-0.148566	10.3287	52.7079	1.96222e-10
KDM1A	0.0615552	9.77835	13.1283	0.0665024
MED9	0.0531614	9.76813	15.2838	0.0782291
BAP1	0.062694	9.80441	7.58183	0.0928551
KIF5B	0.172569	9.96352	33.3379	7.19812e-07
CAMTA1	-0.129215	10.3067	41.2404	5.97136e-08
FBXO33	0.0673824	9.82937	6.3947	0.077572
ARHGEF2	-0.270673	9.96612	100.529	1.11433e-16
SERBP1	0.191752	9.94233	42.803	7.86526e-08
LAPTM4A	0.0414627	9.80476	3.26445	0.266321
B4GAT1	-0.140085	9.78893	48.912	8.42841e-05
PREX1	-0.134483	10.2946	44.2747	2.28643e-08
MBOAT2	0.252926	10.198	98.4266	1.06229e-19
EIF2B3	0.069176	9.88954	5.51023	0.0618527
MARK1	-0.118784	9.81813	21.321	0.00153048
TMEM242	0.0773071	9.80619	11.2395	0.0389747
GDF10	-0.00466976	9.74639	23.1057	0.546619
GRIN2B	-0.0165098	9.7997	0.529383	0.654079
MAPK1	0.0620015	10.0299	4.8053	0.0519832
SRCIN1	-0.27614	10.1448	132.427	1.22916e-24
CUEDC2	-0.0503049	9.80723	4.70132	0.177279
CTSD	0.018509	9.89738	0.415971	0.612562
MEAF6	0.00243815	9.84273	0.00826564	0.948748
CDC42BPA	-0.0361406	10.6192	9.76549	0.0604245
RPL13	-0.0203551	10.2139	0.738144	0.438501
UBE2D4	0.00839878	9.78323	0.207133	0.80887
EIF5A	0.110847	9.8314	17.787	0.00382232
HNRNPU	0.20091	10.2575	86.2616	1.76816e-14
KLC1	-0.0460647	9.92219	2.63221	0.192425
PLIN3	0.000931809	9.79395	0.00198482	0.979513
COQ10B	0.105486	9.79442	25.13	0.00374464
NUDT14	0.0212869	9.75119	20.6288	0.223096
ST8SIA1	-0.00874334	9.7786	0.23689	0.795712
COPS2	0.178616	9.93442	36.2341	6.6991e-07
RPL30	0.0918332	9.82527	12.594	0.0162124
TLK1	0.222483	9.88699	52.9661	3.97603e-09
GNA15	-0.010626	9.74681	58.1819	0.264525
FIBP	0.0355284	9.78747	3.34824	0.3161
RNASEH1	0.0584139	9.77907	11.6292	0.0833429
NOP53	-0.0275754	9.80924	1.37683	0.461294
B2M	0.579159	10.1276	413.104	2.12359e-76
HERC1	0.130538	10.1866	31.6591	2.23886e-06
MAP2	0.0374104	9.97757	1.58995	0.266332
DERL2	0.0842226	9.81074	12.445	0.025555
KCTD13	0.0583898	9.78766	8.96444	0.0995741
UBL7	0.0453059	9.76653	12.3526	0.124917
IRF2BP1	0.0507273	9.7633	19.6144	0.0683203
C9orf16	-0.00931773	9.7745	0.337069	0.775726
NARFL	0.0686637	9.77205	21.2184	0.0299109
KEAP1	0.0955003	9.81048	16.059	0.0113583
MYL12B	0.0795933	9.81323	10.6788	0.0353595
UBALD1	-0.0126828	9.77569	0.591948	0.701161
TBRG1	0.0965127	9.82539	14.0816	0.0115497
UQCRC2	0.0254939	9.88112	0.793585	0.492296
PHKB	0.0163845	10.0451	0.334907	0.599241
SPIRE2	0.0176151	9.76799	1.63379	0.561501
C17orf100	-0.00540069	9.74878	3.20035	0.702776
HLF	-0.0231063	9.76185	4.22301	0.402759
TEX2	0.043227	9.88263	2.21367	0.244672
SCRG1	0.240386	9.89336	64.0489	1.77968e-10
NRBP1	0.0117964	9.82682	0.21069	0.75617
OAZ2	0.018804	9.88032	0.445211	0.612481
SNAI2	-0.00271837	9.74565	175.039	0.433663
CYCS	0.134161	9.80528	33.7809	0.000340807
TNRC6C	0.0324872	10.3352	3.03368	0.17418
RPL6P27	-0.0722922	9.75852	54.4601	0.00530475
PCYT2	0.0162595	9.77444	1.05651	0.618058
TFG	0.0773816	9.86635	7.42858	0.0405029
ZNF446	0.0327008	9.75791	14.1423	0.180478
STX1B	-0.0741431	9.76154	45.2289	0.00763751
RPS15	0.0686002	10.0899	6.32983	0.0222275
NDUFA3	0.0307291	9.83253	1.34109	0.419683
ELP6	0.0962009	9.7898	23.564	0.00713815
GRHPR	0.0137891	9.86809	0.249895	0.712813
PHYHIP	-0.265849	9.77188	288.943	2.41566e-16
DHPS	0.0259649	9.79428	1.52777	0.475158
MED29	0.0126513	9.79414	0.36993	0.727709
RPS19	0.075407	10.0692	7.51742	0.0139737
DBP	-0.0416251	9.75576	27.5646	0.0771158
RPS9	0.149057	10.0371	28.5917	3.36811e-06
PIH1D1	0.128605	9.79628	36.0156	0.00044303
TMEM18	-0.0402503	9.76885	8.41713	0.193532
AKAP12	-0.0490941	9.77611	8.43539	0.139711
SYNJ2BP	0.0181524	9.77531	1.24604	0.580617
CFDP1	0.044514	9.98738	2.16983	0.181586
LARP1	0.139759	9.99941	23.1812	2.77286e-05
PPP1R21	-0.191898	10.2092	74.1964	8.11302e-14
CFAP36	0.174893	9.84676	39.4637	5.56689e-06
CHCHD6	-0.0588528	9.83123	4.92504	0.119358
MRPL4	0.0222518	9.76139	4.33639	0.409257
PDHA1	0.0350023	9.79161	2.98105	0.331415
PRPF4	0.136661	9.77405	78.1201	1.89605e-05
TMEM246	-0.0527658	9.80604	5.23678	0.156273
CBWD5	0.0596081	9.90915	4.07701	0.100715
TTC39B	0.0648374	9.76697	23.7869	0.0284535
TUBB4B	-0.0901368	9.7686	41.4196	0.00369977
SMIM19	-0.119368	9.77836	48.2601	0.000424575
IGBP1	0.00495438	9.80744	0.0439494	0.894605
FBXO25	0.0726189	9.87815	6.44921	0.0523193
ACHE	0.015741	9.75074	12.5737	0.352962
COL26A1	-0.0165127	9.75755	3.42457	0.504069
GTPBP10	0.0112405	9.87702	0.155027	0.762495
CROT	0.139909	9.79966	39.0577	0.000154278
CACNA2D1	-0.114632	10.3867	38.8945	3.15322e-07
DNAJC30	-0.00455644	9.76349	0.15336	0.872455
HDDC2	-0.0566868	9.78333	9.17544	0.10331
FUT9	0.0115469	10.2005	0.211748	0.666008
COX7A2	0.127954	9.85649	20.7416	0.000807728
ENPP4	-0.222416	9.86798	68.2724	1.07631e-09
KLHDC3	0.0231065	9.78671	1.39789	0.513053
OARD1	-0.0838886	9.80567	13.5784	0.0238853
PHF20L1	0.133476	10.0277	22.1866	3.63095e-05
TTC1	0.0580564	10.0983	4.51583	0.050634
AC008608.2	-0.00999535	9.74945	7.90221	0.519049
SKP1	0.153099	9.98433	28.2398	6.51972e-06
MCTP1	-0.173925	9.78129	85.8235	4.50923e-07
IFT22	0.00270089	9.75319	0.193568	0.894759
NDUFA5	0.0686673	9.84639	6.33604	0.0717205
MSL3	0.0543974	9.77335	12.3341	0.0904419
NDUFS6	0.104892	9.83164	16.2393	0.00617736
FRG1	-0.00537146	9.84538	0.039847	0.887241
HSPA4L	0.790992	9.90884	498.474	1.25317e-88
SOBP	-0.0293829	10.0595	1.05119	0.33537
AC004057.1	-0.0402041	9.74967	102.246	0.014929
PPA2	0.0427827	10.1119	2.54482	0.143337
PLPP6	0.011058	9.75093	6.01518	0.523703
PPP3CA	-0.156179	10.2153	44.9792	1.21213e-09
TSC22D3	-0.0870565	9.92589	8.92783	0.0128994
UBE2K	0.0942631	10.1477	13.684	0.000924266
LDB2	-0.119352	9.81536	20.9898	0.00142593
AC093323.1	0.0278511	9.76244	6.32358	0.311951
VLDLR	-0.226054	9.78249	153.702	6.92262e-11
TAGLN3	-0.108158	9.76393	77.5962	0.000211368
CBWD3	0.0733531	9.91026	6.14757	0.0435284
FAM107A	0.277029	9.80803	127.974	2.222e-13
CAMKV	-0.20187	9.7615	313.772	1.1645e-12
INIP	0.0326043	9.88918	1.25414	0.376846
GPX1	0.0273612	9.77011	3.56764	0.379357
RUFY3	0.128096	10.2721	38.5771	5.50659e-07
FBXL2	-0.0457479	9.77398	8.06825	0.161277
USF3	0.109518	9.84057	16.224	0.0042678
RANBP1	0.0273381	9.78902	1.90242	0.443557
SUMO3	-0.0257747	9.76737	3.68317	0.395151
C21orf33	0.0823426	9.8193	11.2269	0.0304304
CHMP4B	0.0924529	9.82395	13.2814	0.0154486
CRNKL1	0.167454	9.81666	46.1072	1.13032e-05
SNAP25	-0.273653	9.7929	163.998	2.41953e-14
MRPS26	0.146451	9.8084	38.9926	0.000101681
TRIP12	0.00786941	10.2027	0.119327	0.767951
RPL10P6	0.00114773	9.74586	8.01733	0.80677
SRPK2	-0.0488178	10.5379	14.2176	0.0161179
C4orf3	0.00189602	9.78988	0.00884793	0.957766
ACOT13	0.0826416	9.81286	11.5375	0.028861
EBPL	-0.0478003	9.76922	11.3135	0.124591
APLP1	-0.19992	10.2971	98.2598	4.04822e-17
BRD3	0.0969317	9.8069	17.5603	0.00978076
KATNAL1	0.0273203	9.92483	0.814736	0.442591
RPS2P5	-0.00444503	9.7492	1.69673	0.765675
CRYM	-0.266396	9.75674	874.299	6.05456e-25
AKT1S1	0.116187	9.77779	47.8307	0.000468098
ROGDI	-0.239806	9.81382	104.159	9.61531e-11
NAB2	-0.0210996	9.75289	11.8742	0.302649
JPT1	-0.0552258	9.76363	21.1099	0.0549734
SPRYD3	-0.0403435	9.78197	4.92743	0.242731
OBSL1	0.0440696	9.7547	40.0641	0.0385972
PSMC4	0.0690957	9.79042	11.7389	0.0540494
PTMS	-0.1256	9.78599	40.3336	0.000364554
KCTD6	0.0884335	9.81256	13.0015	0.0193522
HPCAL4	-0.0437242	9.75768	23.2454	0.0814132
LONRF2	-0.0968956	9.80148	17.2453	0.0085682
PAK3	-0.101011	9.76726	52.981	0.000958341
NTM	-0.732718	10.4004	1733.26	3.27926e-289
GGNBP2	0.0484806	9.88578	2.8421	0.191028
ARRDC2	0.330185	9.8314	155.612	2.14193e-17
LPCAT4	0.0362045	9.76193	10.8925	0.182588
PAFAH1B2	0.0940737	9.94248	10.6174	0.00758495
PEX11B	0.0144385	9.77705	0.750862	0.664936
AAMDC	0.0192618	9.80516	0.696518	0.605505
PARK7	0.0553647	9.88031	3.76901	0.137547
IDH3B	0.0611302	9.77721	13.3651	0.0659546
TMEM9	-0.00801843	9.77786	0.222175	0.811346
PTPN11	0.246805	10.0676	78.2806	5.02934e-15
PTPN20	-0.0226646	9.75016	28.5401	0.180898
S100A13	0.267572	9.78363	219.218	4.28482e-15
NAPRT	-0.0110551	9.7484	15.9098	0.414641
DICER1	-0.0760506	10.3273	16.4145	0.00129697
PCDH17	-0.138907	10.0029	23.3674	1.34015e-05
MAGI2-AS3	-0.0648833	10.0735	6.15493	0.0300066
DANCR	0.152111	9.81332	37.5229	6.15645e-05
RPL26	-0.0591672	9.82164	5.41756	0.11672
RAB18	0.141475	9.88105	23.699	0.000170322
RPS26	-0.20653	9.89356	52.4056	7.09075e-09
M6PR	0.105579	9.78763	29.3833	0.00285866
RAB3A	-0.0432364	9.75332	44.6874	0.0419937
ODF2L	-0.0565883	9.9004	3.7499	0.117004
FNDC10	-0.0182221	9.74687	148.108	0.0678984
MALSU1	0.10736	9.82288	17.7694	0.00494062
RPL3P4	-0.155805	9.7622	175.946	4.91083e-08
TM7SF2	-0.0858445	9.77786	25.7068	0.0109103
SH2D3C	-0.0153981	9.74925	20.0689	0.314102
B3GNT4	-0.000500525	9.74592	1.09428	0.923956
2022-03-02	-0.0268813	9.74947	52.228	0.0915727
SLC22A17	0.00141206	9.97727	0.00243681	0.966395
FJX1	0.0100832	9.74727	36.6968	0.310364
CCP110	0.127908	10.2821	36.5345	4.58406e-07
TMEM74B	-0.0814384	9.74912	490.07	6.07427e-07
CBWD1	0.0763405	9.88701	6.88835	0.0399452
CADM3	-0.0704299	9.75251	134.68	0.000682425
TUBB	-0.0446867	9.79324	4.53475	0.21709
POLR2L	-0.065008	9.78651	11.0715	0.0657122
NDUFB9	0.0339789	9.80068	2.2973	0.358285
TMEM258	-0.138119	9.8722	24.4361	0.000167777
OTUD6B-AS1	0.0639883	9.85514	5.2518	0.0919643
TMEM54	0.031695	9.76129	8.89149	0.23712
SPIN1	-0.0149766	10.1151	0.337569	0.604012
ANO6	-0.248723	9.7873	151.351	1.90308e-12
LYRM1	-0.00987419	9.78663	0.259873	0.779877
SCCPDH	0.240498	9.83624	80.978	5.34218e-10
VPS35	-0.0164604	9.8482	0.367645	0.663138
TTC19	0.154676	9.95182	27.2381	1.09439e-05
ECE1	0.218097	9.87797	54.3842	9.93067e-09
CCDC85B	-0.0689732	9.80598	8.84675	0.0635903
PDCD5	0.140197	9.81907	31.5109	0.000239754
C1QTNF4	-0.303479	9.76756	473.178	1.98318e-22
SNCG	-0.0692113	9.75033	230.666	0.000120449
MAST3	-0.163633	9.91538	33.6946	3.0502e-06
MED4	0.0341321	9.85605	1.51115	0.367022
ACSL1	0.0372216	9.93696	1.67598	0.289925
HIVEP1	-0.123025	9.85968	17.8507	0.000919768
CEP170B	-0.0466741	9.75227	65.7101	0.0205154
SUMO1	0.116657	9.84253	18.1825	0.00234283
SCN1B	0.0353309	9.78002	4.02052	0.298895
CCDC88B	0.0531162	9.75388	71.7282	0.00860552
ACTR6	0.105803	9.79346	25.8862	0.00353022
LY6H	-0.0764429	9.76087	49.31	0.00532168
ATN1	0.119913	9.82401	21.8785	0.00171869
SLC6A17	-0.0312292	9.74872	98.4804	0.033607
MALAT1	-0.109555	11.5892	377.387	3.55115e-22
HP1BP3	0.000638745	10.3964	0.00137718	0.977867
B3GAT3	0.140625	9.82424	30.3885	0.000241628
COPE	0.0647063	9.83877	5.9812	0.0901293
DAD1	0.0733906	9.88115	6.40047	0.0493277
EIF5	0.605855	10.0223	394.419	1.07047e-67
NARS	0.262907	9.87438	84.007	6.95215e-12
RPS28	0.128102	10.0753	20.7584	3.06606e-05
BABAM2	0.0380283	9.96372	1.55466	0.265679
FEZ1	-0.197994	10.2088	79.9407	1.25191e-14
UBA52	-0.0473906	9.92509	2.64889	0.178499
GNAO1	-0.265437	10.4333	239.394	3.14876e-36
OSBPL8	0.216713	10.0594	55.4854	7.63848e-12
COPS3	0.0683802	9.81965	7.56302	0.07209
RPL23A	-0.0137787	9.82192	0.292212	0.715859
MAP2K6	0.103853	9.84704	13.5962	0.00662381
KPTN	0.0612987	9.7629	29.483	0.0258071
SRM	-0.0158553	9.7754	0.943878	0.630676
DYNLL2	0.017223	9.82831	0.448636	0.65054
SV2B	-0.0251917	9.84099	0.774736	0.505734
CLASP1	0.0372678	10.3874	4.55304	0.104632
CAMK2A	0.0106669	9.76814	0.592716	0.726041
MRPL13	0.0621073	9.79594	8.31378	0.0893449
ANKRD12	0.11037	10.1029	16.5426	0.000213019
MLLT1	0.108999	9.82141	18.6335	0.00428948
ARL8B	0.0605824	9.94844	4.29549	0.0821387
MAGED4B	-0.0101907	9.75213	3.34122	0.599382
MAPRE3	0.0669073	9.79651	9.84838	0.0677006
MAGED4	-0.0649045	9.76274	30.9446	0.0221973
LINC00599	-0.0219173	9.75069	22.1557	0.21572
CBWD2	0.267513	9.92686	78.5101	2.86487e-13
SBDS	0.260716	9.90558	80.4715	3.01322e-12
WBP4	0.163504	9.87854	31.3462	1.52281e-05
ILF3	-0.0132853	9.87468	0.22254	0.720693
BABAM1	-0.0251731	9.77029	3.02529	0.423055
AC021016.2	0.0129115	9.74697	89.4611	0.141656
PTCHD4	-0.00870411	9.75007	4.44168	0.59782
JUND	0.183547	10.0415	44.0515	1.06986e-08
GCC2	0.101443	9.9624	11.4902	0.00329614
UQCRFS1	-0.0170043	9.79025	0.69908	0.635321
FAM105A	-0.0287571	9.75094	36.8468	0.113898
PPP5C	0.128979	9.80846	30.191	0.000615555
FGD4	0.110665	9.90746	12.5896	0.00250471
ZNF76	-0.0453776	9.80302	4.07866	0.220662
FAM216A	-0.0396379	9.79712	3.3596	0.278783
BCL11A	-0.0698007	9.77153	19.5398	0.0290917
TEX261	-0.0208969	9.77158	1.94288	0.511683
NUAK1	-0.229546	9.86383	68.8342	3.45281e-10
ANKRD39	-0.0248829	9.77782	2.14419	0.459188
MRPS9	0.0533902	9.88977	3.25662	0.148665
CCDC74A	-0.00018277	9.74685	0.0176856	0.984096
RNF181	0.0294318	9.77015	4.12396	0.344408
CCDC74B	0.00507525	9.74623	47.5701	0.426337
ZNF275	0.0472638	9.76469	15.2132	0.0985324
ENOX2	-0.0268173	10.1171	0.932059	0.351305
NKAP	0.113873	9.80998	22.94	0.0025425
FRMPD4	0.104334	9.79402	23.5562	0.0040899
NPDC1	-0.314669	9.77998	311.508	3.457e-20
NCS1	0.0501608	9.76871	12.7755	0.0994901
ST6GALNAC6	0.00437618	9.74619	37.8962	0.484078
CDK9	0.102435	9.77708	38.4696	0.00194826
SH3GL2	0.00676136	9.76245	0.351435	0.807353
ARFGEF1	-0.0280883	10.071	1.06042	0.35145
UBE2V2	-0.0144855	9.87551	0.257766	0.69643
STMN4	-1.06391	9.89951	1826.49	4.58223e-244
POLR2J3	0.115975	9.95081	16.0271	0.000928689
TMEM130	-0.106784	9.76108	94.1678	0.000117967
EIF4H	0.14755	9.91922	26.2294	4.93806e-05
LINC00957	-0.0204259	9.75577	6.78402	0.380929
EEPD1	0.143853	9.96403	21.5998	3.32245e-05
TMEM106B	-0.0482047	9.92651	2.82158	0.170472
FSCN1	-0.212135	9.87514	59.5279	5.06009e-09
SH3BGRL2	-0.0699047	9.79059	11.4933	0.0513786
AARS2	0.0310378	9.75284	29.3022	0.110744
MEA1	0.0242825	9.75662	8.80794	0.300661
DNPH1	-0.0828937	9.76025	63.4105	0.00222765
GLO1	0.05447	9.82833	4.33759	0.153145
HLA-A	0.625018	9.8703	418.056	1.36698e-55
TIGD6	0.0314458	9.75874	11.5972	0.209708
ETF1	0.205788	9.82294	64.493	8.56439e-08
TXNDC15	0.291725	9.86621	104.984	4.33736e-14
PAM	-0.153439	9.78315	63.5679	1.03025e-05
CCNH	0.060272	9.8871	4.41499	0.10413
SCOC	0.0614233	9.84258	5.20669	0.107337
SEC24D	0.00222844	9.77088	0.0222337	0.943647
PCDH10	-0.101548	10.0366	13.6371	0.00102251
GRINA	-0.117213	9.77981	43.7455	0.000602971
FGF12	-0.0820557	9.84982	8.34928	0.0286873
GRSF1	-0.0148831	9.8296	0.332467	0.694747
SEC61A1	0.0317296	9.80231	1.99611	0.39259
MTRNR2L12	0.20694	9.79024	102.121	6.65297e-09
PRPS1	0.0307164	9.77448	3.70203	0.345705
RNF7	-0.0335617	9.80678	2.10615	0.368168
RHOA	0.0693691	9.93352	5.70065	0.050398
NDUFA6	0.117366	9.79228	32.2198	0.001151
BPHL	0.0703538	9.76154	45.1104	0.00807803
NCAM2	-0.0604972	11.0765	59.2273	3.69639e-05
TPD52L2	0.170109	9.81828	47.0285	8.49083e-06
PTPRT	-0.115766	9.76885	64.5615	0.000209224
HSPA5	-0.343693	9.86607	154.152	1.42752e-21
MMP24OS	-0.0547523	9.77348	12.0615	0.0924215
PRNP	0.00788687	10.0586	0.0836978	0.797311
METTL5	0.0481454	9.79548	5.08251	0.187178
VDAC3	0.0700737	9.81918	7.96597	0.0652549
CHAMP1	0.118895	9.80031	29.013	0.00132229
RGCC	-0.101394	10.2184	20.5579	8.72195e-05
MVK	0.118526	9.80076	29.2346	0.00138582
CKAP4	-0.0184541	9.75761	4.24699	0.456566
NDUFA12	0.118335	9.83035	20.1149	0.00202372
CNTN5	-0.0588117	9.78949	8.30821	0.0998928
KDM1B	-0.0042397	9.8855	0.0209741	0.908438
KPNA4	0.0305186	9.91106	1.08928	0.398046
EIF2S1	0.0984766	9.84647	12.6985	0.01001
CNTN1	-0.260174	9.9742	74.0309	9.55963e-16
PCF11	0.0912093	9.9835	10.0999	0.00678003
METAP2	0.199371	9.93112	44.3962	3.51949e-08
MCRIP1	0.0652921	9.81367	7.32305	0.0842337
MLF2	0.0900813	9.82287	12.2574	0.0182143
AP2B1	0.17555	9.99448	35.7982	1.88904e-07
SPCS2	0.0766205	9.95734	7.04564	0.0267537
PAN2	0.0121202	9.81013	0.262247	0.746877
STX5	0.0065358	9.83172	0.0621897	0.863438
IMPDH2	-0.059473	9.77545	13.269	0.0723041
PARL	0.0308872	9.76188	8.2109	0.255822
UBA1	0.304754	9.93521	105.219	7.05405e-17
MTCO1P12	0.0998312	9.75801	138.313	2.08274e-05
NECAB1	-0.0124252	10.2184	0.273969	0.635574
SCG2	-0.638625	9.79529	944.424	1.77858e-73
TMEM59	0.0105604	10.025	0.149304	0.740039
ATP6V1E1	0.240526	9.87696	70.1475	2.95386e-10
PSPC1	-0.0051379	10.1488	0.0433803	0.854306
GNRHR2	-0.000428564	9.74967	0.0133721	0.978137
TM9SF2	0.0698964	9.91515	5.70151	0.0531298
CETN2	0.0718893	9.76059	50.9692	0.00552649
RNF187	0.00736927	9.80317	0.106033	0.842727
LYST	0.0927094	9.99601	9.47098	0.00528663
ARPC3	0.105484	9.83533	16.0141	0.00591301
TMBIM6	-0.038347	10.0631	2.08578	0.20635
GANAB	0.0413015	9.81973	2.77549	0.276501
ENC1	-0.0751397	9.75329	128.717	0.000510762
GRAMD1B	0.0025962	9.77012	0.031367	0.933794
TTC9B	0.00361259	9.75103	0.580567	0.83794
CASC4	0.0140097	10.113	0.283044	0.629934
LRRC8B	0.251608	10.0112	75.0139	5.54994e-14
PRPF19	0.0606819	9.79614	8.07989	0.0971384
MAPT	0.180629	10.4161	96.7095	4.07247e-15
LMO7	-0.12386	9.78626	39.3327	0.000446302
RRP15	0.102779	9.81194	17.7832	0.00656341
CDK5	-0.0543676	9.75256	82.5879	0.00826646
NTPCR	-0.0435556	9.80176	3.7356	0.238711
ADAR	0.245888	9.92928	67.8826	1.52224e-11
UNC119B	0.00135938	9.76239	0.0148881	0.960904
CDK14	0.142691	9.88882	21.1837	0.000135807
GABRD	-0.0637099	9.7494	278.648	0.000113084
ARHGDIG	-0.0651311	9.75118	162.699	0.000641598
LRP8	-0.00760962	9.75093	2.67857	0.66845
CBX7	0.0460578	9.8832	2.67045	0.215064
BTBD2	0.00382601	9.80832	0.0262774	0.918619
RABIF	0.0425572	9.76384	13.0537	0.131278
CTNNB1	-0.0524553	9.94207	3.17765	0.129032
WAC	0.161452	10.2526	52.4926	6.64621e-10
DSTN	0.114655	9.91776	14.8974	0.00156462
MIEN1	0.0821986	9.79266	15.3412	0.02305
TMEM132A	0.0706138	9.75739	71.6453	0.00257112
CHI3L1	0.154897	9.76434	178.129	1.37737e-08
MAP2K4	0.206782	10.104	54.1517	7.75896e-12
FKBP8	-0.0638367	9.85468	5.46418	0.0885329
RFPL1S	-0.0693407	9.75273	125.22	0.000941148
NOLC1	0.159827	9.79432	57.4962	1.10143e-05
PIK3R3	-0.025834	9.74812	98.2526	0.0531134
MRPL16	0.0382851	9.77458	5.80182	0.239916
PTOV1	0.0553926	9.8004	6.03494	0.134218
RAP1GAP2	-0.044828	9.77158	8.71014	0.160279
RPL21P28	0.000570623	9.74719	0.111564	0.955378
HNRNPA1	0.0473604	9.88282	2.80997	0.202586
AMPH	-0.0468728	9.75573	34.234	0.0467967
TNIP1	-0.0137843	9.7974	0.40388	0.706852
MXI1	-0.0563902	10.2409	6.47897	0.0270876
MTND2P28	0.0138033	9.76883	0.970608	0.652987
KCTD21	-9.25743e-05	9.75673	0.000124129	0.996907
WASHC2A	0.133016	9.86034	22.4023	0.000486909
REPS2	-0.323264	10.089	148.691	3.32229e-30
FBXO34	0.115357	9.87621	14.5487	0.00219253
GSTO1	0.091498	9.86843	10.4695	0.0154342
CBX6	-0.0915265	9.86224	10.9453	0.0138415
DNAJC6	-0.138856	10.612	121.888	2.81904e-13
EIF4G2	0.213924	9.91877	51.3373	5.49153e-09
TCAF1	-0.179873	9.87956	40.6523	7.14948e-07
ITPK1	0.0378506	9.97854	1.69347	0.260182
SLC35F1	-0.0783822	9.79587	12.7728	0.0314732
DDX24	0.24321	9.96321	68.6859	4.70632e-12
NAV3	0.0487233	10.1527	4.34529	0.0831891
WARS	0.00855471	9.77738	0.256992	0.79807
EID1	0.0811787	9.98629	8.15161	0.0155013
MYO5A	-0.215417	10.2631	110.106	1.07311e-18
ALDOC	0.00553526	9.7564	0.47336	0.813972
KCNMA1	0.0295865	9.91177	1.0246	0.412305
NDUFAB1	0.0432693	9.82644	2.85033	0.255815
RPS27AP16	-0.0607998	9.75512	60.6042	0.00877549
FAM96B	0.180413	9.8556	41.2284	2.6375e-06
PHLPP2	-0.0893065	9.80909	13.9742	0.0166181
KARS	0.100466	9.79159	23.893	0.00528182
CMC2	-0.0635109	9.889	4.80709	0.0816395
AC135782.1	-0.054293	9.74773	504.667	3.68069e-05
RPL23	-0.0481659	9.88814	2.81367	0.187818
ELP5	0.032029	9.7617	8.83067	0.236589
ARHGAP27	-0.0841374	9.76067	62.7928	0.00210609
RAD51C	0.0989499	9.84092	13.2089	0.00975326
ADAMTS10	-0.0123754	9.75135	6.19787	0.501929
ETS2	-0.0300718	9.7544	18.1824	0.175075
CYB561	-0.00610435	9.74913	3.3868	0.680694
NFRKB	0.0678607	9.7784	15.6599	0.0430418
EIF2AK2	0.280235	9.86462	91.1241	4.00616e-13
SRP68	0.0845699	9.82335	11.1999	0.0266177
TCF4	-0.16768	10.572	175.663	6.32186e-18
GPR150	-0.00506974	9.74585	132.098	0.326085
FAM81A	-9.97715e-05	9.77789	3.34651e-05	0.997634
SYT4	-0.1224	9.75465	258.816	1.61662e-07
DOK6	-0.155248	9.7648	143.561	1.84618e-07
SMU1	0.171781	9.92851	34.1573	1.9848e-06
BSG	-0.0401651	9.82943	2.37093	0.288542
PIK3CB	0.0960928	10.0283	11.0173	0.00277599
MAP2K2	-0.00941656	9.86629	0.11497	0.801311
STARD3NL	-0.0423937	9.80356	3.45403	0.253046
SLC2A3	-0.0260011	9.75996	6.23886	0.326489
GTF2F1	0.0941664	9.77965	29.7485	0.005301
CPLX1	-0.058786	9.75454	64.317	0.00946611
ERC2	-0.0164028	9.90322	0.272454	0.650239
MRPS7	0.0504627	9.7748	10.1296	0.121624
AC010615.2	-0.0575246	9.76258	24.8466	0.0417393
SRSF10	0.317727	9.97197	115.474	1.84365e-19
ZNF540	0.0898471	9.80332	15.6677	0.0158883
SIRT2	0.012649	10.0285	0.216547	0.690074
RPS16	0.0427415	10.0081	2.22874	0.189444
PRPF31	0.0848823	9.79436	16.2595	0.0196439
EPHB6	-0.105147	9.75761	129.848	3.86655e-05
ADD3	-0.0314364	10.2634	2.12785	0.210707
GLT1D1	-0.0148088	9.75479	4.09582	0.507421
EPN1	0.0284615	9.792	1.94238	0.430292
YWHAQ	-0.0640332	10.1553	7.00124	0.0201675
DYRK4	-0.0273558	9.76151	6.3856	0.319085
ATRAID	-0.0132512	9.78486	0.489576	0.705303
TOMM7	0.0336839	9.90715	1.33638	0.353042
ACTR1B	-0.0923903	9.81402	15.008	0.0136427
CXorf40B	0.0321846	9.75446	22.6765	0.130324
BEX5	-0.0418378	9.75255	48.5504	0.0402717
SYP	0.0260702	9.80038	1.32492	0.480525
PORCN	-0.0358924	9.75437	26.1195	0.106195
UXT	0.0697513	9.78987	11.7305	0.0512894
NDUFB11	-0.0296079	9.79671	1.85525	0.418175
RGN	0.101056	9.78622	27.4369	0.00404689
CXorf40A	0.0319003	9.75899	11.463	0.206502
SET	0.0722992	9.92279	6.15419	0.0438466
DNM1	-0.0996942	9.78551	25.6756	0.00458626
STXBP1	-0.0250292	9.82996	0.882377	0.50893
GNAQ	-0.102186	10.4311	37.7077	2.52631e-06
ELAVL2	0.0045673	9.7512	0.89207	0.798389
RAD21	0.193958	10.0374	47.4447	1.87222e-09
ZNF706	-0.0148416	10.1541	0.353576	0.593386
PEX2	-0.0308207	9.85679	1.24461	0.411957
ASPH	0.02186	9.96062	0.531391	0.522834
XIAP	0.058431	9.90035	3.97993	0.110629
BAG4	0.0397286	9.81964	2.50251	0.29513
TRIM35	-0.0874953	9.77554	28.7137	0.00834174
TUSC3	-0.136161	9.76448	115.94	4.10782e-06
AP1S1	-0.0362757	9.77465	5.12226	0.269066
PEG10	-0.00141268	9.81992	0.00317819	0.970212
HSPB1	1.14635	9.90704	958.871	4.88013e-172
MLXIPL	0.00182864	9.7558	0.05436	0.936763
TSPAN13	0.00122742	9.75219	0.0486192	0.949181
SRSF3	0.244277	9.93336	68.0266	1.6878e-11
GNL1	-0.0228862	9.77825	1.77334	0.497283
ATXN1	-0.10366	10.5727	54.5503	1.29214e-07
RPL15P3	-0.0638756	9.75295	99.2875	0.00250452
SPOCK1	-0.088695	10.84	80.1638	9.90509e-08
PLK2	-0.236911	9.75679	696.773	3.43784e-20
ARHGAP10	-0.0801009	9.76112	51.9898	0.00369802
CCDC126	0.0860317	9.81986	11.2261	0.0238256
LIMCH1	-0.172756	10.6784	207.184	1.45674e-21
RGS12	0.0760586	9.82105	8.8116	0.0457529
RNF168	0.230397	9.8446	68.8856	2.64473e-09
GYG1	0.0426092	9.78533	4.96509	0.22442
NEK11	0.0321378	9.81926	1.55405	0.396696
TUSC2	-0.0151203	9.76817	1.2162	0.621024
UQCRC1	0.0341414	9.79349	2.6641	0.346557
SELENOM	0.0198447	9.84761	0.538421	0.600861
PES1	0.102666	9.77595	40.5717	0.00171162
MAPK8IP2	-0.0371389	9.76116	11.7533	0.174039
HSPA13	-0.0130887	9.79604	0.375017	0.720057
NBDY	0.0666924	9.96887	4.65536	0.0505735
ZNF449	0.100171	9.76748	58.7697	0.000701592
RPL24P8	-0.0113934	9.74797	21.4074	0.366887
SLC12A5	-0.0795097	9.75619	89.3154	0.00105719
SLC23A2	0.0842965	9.95303	8.00394	0.0153895
CHPF	0.0516494	9.7572	38.665	0.0283998
PNKD	0.000628183	9.83146	0.000575116	0.986808
SLC39A10	-0.146135	9.90786	24.7333	3.69688e-05
HCG18	0.0595562	9.81987	5.5847	0.117086
DBI	0.245287	9.92644	67.7263	1.93892e-11
EIF5B	0.254594	9.96565	70.9108	4.32153e-13
DCTN1	0.0728892	9.83328	7.89251	0.0564752
RPH3A	-0.000982835	9.75718	0.0127182	0.967672
TTTY15	-0.707964	9.75502	10075.3	2.339e-181
HECTD4	0.125431	10.0465	20.2925	7.39681e-05
THAP2	0.00434537	9.79569	0.0408287	0.905243
HSF1	0.102125	9.79628	22.4957	0.00527395
DZIP1	-0.155254	9.76056	202.981	2.08423e-08
VMO1	0.00852993	9.74736	23.7018	0.407256
USP5	0.0595612	9.78569	9.84543	0.089869
JTB	-0.0586017	9.81582	5.65795	0.11906
TM9SF3	-0.0656355	9.98008	5.48063	0.0471706
PDCD5P1	-0.00377459	9.74559	309.982	0.20324
B3GAT1	0.120341	10.0345	19.0965	0.000171509
PSMB1	0.213345	9.9137	52.7636	7.14719e-09
PTGES3	0.676752	10.2168	549.221	9.12805e-118
SCAF11	0.192632	10.0991	50.5025	2.04937e-10
SF3B5	0.0878031	9.79594	17.0626	0.0163398
MRPL51	0.00799965	9.80962	0.113535	0.831171
EXOC1	-0.0125144	9.96296	0.192045	0.712493
WASF3	-0.0387334	9.85412	1.90164	0.302824
GLUL	0.305975	10.1309	131.59	1.37354e-24
ALDH9A1	-0.0319083	9.79207	2.38349	0.376465
B3GALNT1	-0.0479129	9.75107	93.4073	0.0103541
TGOLN2	-0.102755	9.93104	13.2925	0.00310017
PUS3	0.122643	9.76435	109.6	9.5173e-06
BANF1	0.148552	9.81266	35.5425	8.96808e-05
CROCCP2	-0.221763	9.83967	71.3385	2.37569e-09
RAE1	0.0507708	9.78288	7.64232	0.14224
RPL27A	0.0964589	9.98866	11.4534	0.00401226
ABCB8	-0.0218564	9.78233	1.45432	0.527443
PLPP3	-0.18306	9.90078	40.313	2.55102e-07
FABP3	-0.0350494	9.75899	13.3166	0.176568
MARCKSL1	-0.297727	10.0326	128.103	5.85265e-23
NAA60	0.0417078	9.76357	12.9605	0.137172
FBXW7	0.0667855	9.98432	4.44903	0.046465
ACTR8	0.0545376	9.77694	10.8941	0.100406
WRAP73	0.0536999	9.77823	9.99505	0.109308
CMPK1	0.189581	9.85457	44.8573	8.24944e-07
CCNL2	0.0653659	9.93381	5.12788	0.0649977
IDI1	-0.000184049	9.83552	4.96255e-05	0.99613
RITA1	-0.0282042	9.74981	50.9041	0.0874732
FBXL15	-0.026069	9.76451	4.52003	0.3693
C9orf116	-0.00713882	9.74754	12.2719	0.533422
PRDX3	0.132857	9.79704	37.9902	0.000293925
MKL2	-0.00472016	9.82371	0.0323219	0.900873
SSRP1	0.0651598	9.77791	14.9063	0.0512122
HES4	-0.275221	9.75236	1912.77	2.13114e-35
MAPK3	-0.0818909	9.78921	17.0481	0.0217924
NECTIN2	-0.00208814	9.75317	0.115611	0.918778
KSR2	-0.0553186	9.7689	14.6975	0.074675
ANAPC5	-0.271663	10.1095	129.167	2.34372e-22
GREM1	-0.289073	9.88601	101.996	4.55149e-16
FAT3	-0.205489	9.78277	115.702	3.22191e-09
POMGNT2	-0.0286695	9.76525	5.23684	0.329492
S100A1	0.115577	9.76803	75.5729	9.91344e-05
PLPPR4	-0.0611898	9.75903	38.4268	0.0194388
PTP4A2	0.0974189	10.18	16.5297	0.00041972
ANAPC10	0.0741894	9.9618	5.83843	0.0310872
NR1H2	0.0494705	9.80093	4.94819	0.181497
TMEM121	-0.148267	9.75901	223.95	2.99135e-08
AC008026.1	-0.00376428	9.7483	2.01122	0.77401
PSMC3	0.0426756	9.79117	4.41294	0.235562
GSK3B	-0.022912	10.1636	0.858164	0.405014
TTLL7	-0.158929	10.8722	379.865	7.42916e-23
PEMT	0.0178878	9.76768	1.7535	0.55375
PLCB1	-0.077075	9.93468	7.08839	0.0264243
C1orf174	-0.0762748	9.76712	32.484	0.0122023
SIK2	0.0814722	10.2433	12.3376	0.00174542
FAUP1	-0.0181863	9.74851	37.7397	0.193094
TMEM126B	0.0993811	9.81592	16.529	0.00886753
NASP	-0.105575	10.0866	17.0957	0.000316898
GPBP1L1	0.0621623	9.97733	4.63144	0.0657018
ARL5B	0.0463097	9.79002	5.23769	0.196048
RASGEF1A	-0.0289708	9.75174	29.0661	0.132026
NSMCE4A	-0.0804845	9.82093	10.6878	0.0325141
YWHAE	0.059808	10.0951	5.20586	0.0447834
NCOR1	0.110315	10.2771	29.6758	1.40186e-05
TSEN15	-0.0517875	9.94671	3.20242	0.132017
CHID1	-0.0846369	9.79332	16.577	0.0193185
SLC25A3	0.0508098	9.84804	3.5124	0.181674
MT1E	0.195709	9.82119	57.089	3.35574e-07
LAMTOR1	0.0306084	9.82339	1.47324	0.420523
NRAS	0.0623788	9.77076	18.7491	0.0454898
MLST8	0.0359074	9.75638	20.8773	0.119828
PSME2	-0.0116068	9.76067	1.23055	0.665243
PALM	-0.0458354	9.76534	12.7415	0.120709
COX8A	0.0565216	9.79934	6.46932	0.12552
SUCLA2	0.0961205	9.91632	10.5128	0.00796216
FAM192A	0.0322514	9.88662	1.29005	0.383114
RNF41	-8.82418e-05	9.78715	2.0294e-05	0.998017
PEG3	-0.0272954	9.87166	0.911769	0.462953
DNAJC3	-0.0557757	9.95844	3.63231	0.100124
RING1	0.000141544	9.80183	3.92892e-05	0.996955
KPNA2	0.0004474	9.76329	0.00149342	0.987358
AHSA1	0.504333	9.8964	251.122	1.01181e-38
PSME2P2	-0.00351543	9.74576	109.549	0.427344
BBS2	0.0915721	10.1272	13.3347	0.00159717
TMEM50A	0.0528652	9.85185	3.69229	0.164047
ETFA	0.00535484	9.79536	0.0624376	0.883238
EMC10	-0.201893	10.0078	53.9063	1.3654e-10
FAM173A	0.0310032	9.78966	2.47349	0.386109
FLYWCH1	0.0304127	9.82253	1.48906	0.423312
MBIP	0.117464	9.82817	20.5152	0.00216895
HIRIP3	0.0754629	9.77058	28.1423	0.0150709
ATG16L2	-0.209291	9.80052	89.4237	1.05794e-08
NDRG4	-0.112843	9.77532	46.0969	0.000664333
SGTA	-0.146269	9.85316	30.0639	8.38064e-05
LAMTOR4	0.0457872	9.83719	2.97261	0.229757
PELI3	-0.0293647	9.75826	10.1175	0.247189
BAD	0.0498955	9.7661	15.3099	0.0885092
ZFP90	0.0600328	9.87042	4.48805	0.110291
BLOC1S1	-0.0747262	9.79394	12.5829	0.039286
CDK5R1	-0.0126916	9.76309	1.20183	0.652979
SAT2	0.104465	9.83513	15.2143	0.00640697
SLC1A4	0.000754764	9.77932	0.00181602	0.982258
GPALPP1	0.0204233	9.81028	0.740515	0.586766
TVP23C	0.0255223	9.77274	2.86639	0.425818
NFIB	-0.228702	10.2499	95.8285	1.63383e-20
ODC1	-0.0079209	9.7566	0.904644	0.739992
TVP23B	0.066255	9.81594	7.32967	0.0804527
EPN2	-0.1058	10.2782	27.0258	1.58502e-05
XPC	0.062188	9.80515	7.50359	0.0959655
PTGES3L	-0.0214952	9.74779	85.3087	0.0860378
MED1	0.0259743	9.81336	1.16123	0.491043
RPS13P2	-0.0129102	9.74624	218.401	0.0865323
ID2	0.075174	9.75526	113.781	0.000408521
DUSP1	0.0594454	9.7591	39.6098	0.0173441
PIAS4	0.0492825	9.84103	3.40192	0.196008
ZNF426	0.0378972	9.78224	4.31161	0.271821
PRDX2	0.0449897	9.78654	5.44694	0.202228
PRKACA	0.0662108	9.81424	7.44915	0.0801554
2022-03-06	0.0750808	10.271	13.8318	0.00310129
SMDT1	0.117039	9.81073	24.2085	0.00194569
RAB11FIP5	0.00903364	9.75482	1.58772	0.681794
FBXO27	-0.108183	9.78547	31.3915	0.00209308
SLITRK4	-0.0334935	9.7501	62.2424	0.049618
MAGEE2	-0.000402779	9.74578	1.56263	0.924846
USP11	0.0550583	9.87918	3.63069	0.140095
CLCN4	-0.109691	9.96098	14.9759	0.00108619
SLC27A4	-0.0120907	9.79159	0.340244	0.737171
RAD23B	0.0406919	9.90713	1.91143	0.262319
SHC3	-0.0461932	9.77611	7.42025	0.164552
VCP	0.0443692	9.86587	2.53619	0.238611
CHMP5	0.0861497	9.83146	10.9045	0.0243
RRAGA	0.00593078	9.79896	0.0735499	0.871999
FDFT1	0.324621	10.0185	123.571	4.04029e-22
LUC7L2	0.063218	9.82603	6.37727	0.0973214
EXOC4	-0.045231	10.332	5.40046	0.0559966
CBLL1	0.0829326	9.79734	14.589	0.0238962
CHN2	0.0607371	9.77048	17.958	0.0507536
ARL4A	0.205187	9.7806	136.121	1.02108e-09
ADAP1	0.0081326	9.80166	0.13311	0.826178
HCG11	0.106471	9.75901	144.306	1.08185e-05
CAP2	0.00896575	9.76369	0.555573	0.752096
GMDS	0.0792018	9.89521	6.23691	0.0318335
GABRG2	-0.0430952	9.75871	19.483	0.0950917
TMEM161B	0.0769269	9.89929	6.81381	0.0363094
TRIM23	0.185029	9.89855	40.075	6.84962e-07
RPL26P19	0.0158237	9.814	0.414736	0.674842
RPS27AP11	-0.0223326	9.74757	103.355	0.0632122
NCBP2	0.0618109	9.77876	13.0811	0.0661937
PSMD2	0.0647059	9.80361	8.12836	0.082385
TMSB4XP4	-0.0323984	9.7532	25.5115	0.122543
MCCC1	0.131072	9.94712	19.9894	0.000199293
TBL1XR1	-0.0502689	10.3789	8.02188	0.0273678
TAF9	0.0074204	9.76366	0.399593	0.793716
COPG1	0.0172852	9.78759	0.790213	0.62601
C3orf14	0.00357524	9.76742	0.0712327	0.905693
MAP4	-0.0933649	10.1253	13.5886	0.000949839
EMC3	-0.0226066	9.85052	0.6859	0.549024
POLR3H	0.0316734	9.78118	3.14499	0.355453
TXN2	-0.000471273	9.79904	0.000465813	0.989794
CLEC2L	0.00520967	9.74748	7.54965	0.629118
CDS1	-0.0381126	9.75256	40.4595	0.061165
DGCR2	-0.0904442	9.92722	9.60657	0.00964865
PRMT2	-0.0814484	10.0269	8.60156	0.00934894
INTS1	-0.0037269	9.79578	0.0303443	0.918684
DPM1	0.146673	9.82939	31.5584	0.000134088
FITM2	0.00901348	9.76135	0.712129	0.73909
SLC24A2	-0.218222	10.9434	757.979	8.0643e-46
PKIG	0.176076	9.86126	35.7455	4.24822e-06
EDEM2	0.0435666	9.78828	4.86675	0.220521
RIPPLY2	0.0473324	9.76265	17.6801	0.0850927
ZNF133	-0.015873	9.82641	0.382019	0.675373
SIRPA	-0.148279	9.85894	28.9086	6.24597e-05
PSMD1	0.0598825	9.96587	4.19605	0.0798702
RETREG2	-0.133878	9.8108	31.8873	0.000325337
KCTD18	0.0143529	9.79113	0.492399	0.689899
UBE2G2	0.111157	9.93067	14.3468	0.00188059
PDE1A	-0.660798	10.2219	620.201	2.60194e-135
NPC2	0.0173347	9.79027	0.724796	0.628802
ZFAND2B	0.0445695	9.77569	7.42552	0.175245
ACTR10	-0.0224281	9.78497	1.41284	0.522419
EFR3B	0.11848	9.87708	15.383	0.00165112
OST4	-0.0058256	9.77868	0.11128	0.8631
SNX17	-0.0544108	9.77978	9.63113	0.110642
CBLN2	-0.0103402	9.74898	9.99994	0.48081
RAP2A	-0.0919309	9.8277	12.5748	0.014676
TXN	0.0569597	9.81347	5.47264	0.131731
PGRMC2	0.0608373	9.8631	4.59737	0.107393
BRI3BP	-0.139862	9.78878	49.2097	8.57572e-05
TYRO3	0.109866	9.92688	14.3821	0.00220742
EDF1	0.0493748	9.87137	3.09357	0.188212
ZNF865	-0.00505785	9.76336	0.189821	0.858227
GFRA2	-0.0120253	9.75072	7.00781	0.493197
DNAJB9	-0.00574328	9.77167	0.145183	0.85676
NECTIN1	-0.146818	9.86055	29.4428	7.25695e-05
AURKAIP1	0.103411	9.81387	18.3392	0.00636195
TRIM8	0.0198389	9.815	0.66245	0.599347
FH	0.00382102	9.78199	0.0448567	0.911774
CTSF	-0.0182494	9.86841	0.425608	0.624849
ABHD13	0.00223102	9.79081	0.0119523	0.9505
LMO4	-0.0249939	9.86071	0.771522	0.505026
SDF2	-0.0585037	9.79412	7.69447	0.106917
TRAPPC3	0.0233872	9.79738	1.17035	0.523767
FAM120B	0.102454	10.0632	13.644	0.00094794
CHGB	-0.0590211	9.75441	66.9917	0.00880389
CDS2	-0.125832	10.0066	20.516	7.72841e-05
PTPN4	-0.0347425	9.99158	1.39874	0.289413
AP3S1	0.0332529	9.84756	1.38657	0.381342
SNX9	0.113593	10.1176	18.4854	0.000110841
UBE2J1	-0.060476	9.81963	5.91874	0.108485
MOAP1	-0.0352045	9.76833	6.48926	0.25207
ALKBH5	0.109893	9.85102	15.7623	0.00403486
LINC01535	-0.165574	9.8185	45.8837	9.31967e-06
DOHH	0.0441777	9.8139	3.35494	0.242261
ZBTB8OS	0.207986	9.9065	47.8055	2.05807e-08
SORT1	0.0516034	10.7302	28.4567	0.00457918
ARV1	0.0352427	9.79846	2.55994	0.338155
SMUG1	0.0288378	9.77022	4.03147	0.354702
ZC4H2	-0.0560548	9.88982	3.45203	0.124389
PNMA8B	-0.0167301	9.75404	6.2299	0.439273
MTCO3P12	0.0119308	9.74691	81.3869	0.168408
B9D1	0.0262302	9.78632	1.8467	0.456915
RNF175	-0.0616102	9.75145	136.95	0.00147429
EVI5	-0.0163179	10.1932	0.453623	0.542576
TPP1	0.16054	9.83828	34.9288	3.04526e-05
ENSA	-0.00518756	9.85556	0.0331123	0.890496
STPG1	0.0548609	9.80213	5.86696	0.139502
FBXO44	0.0227047	9.77572	1.91887	0.490873
SLC25A33	0.0709194	9.79459	10.9862	0.0514265
TMCC1	-0.119004	10.1917	24.4046	6.59191e-06
PSMD13	0.100531	9.81613	16.8147	0.00812776
GABRA1	-0.0254294	9.7517	22.6073	0.183613
LUZP1	0.0561967	9.77097	14.2952	0.0725637
MRPL21	-0.0216005	9.77648	1.69458	0.51628
KCTD2	-0.0160899	9.78264	0.777509	0.642306
ATP6V1B2	0.144807	9.82119	32.3342	0.000152856
CAMK1D	0.00326033	9.84607	0.0141212	0.931521
EPHA4	0.0208464	9.75821	5.03256	0.40056
MED10	0.0795553	9.81372	10.8048	0.0355479
TMEM177	0.0298119	9.76106	8.29877	0.263962
SRPRA	0.010946	9.78499	0.338595	0.754771
LUC7L3	0.0849783	10.3771	25.6382	0.000269558
AP4S1	-0.00507571	9.81975	0.0406595	0.893288
TXNL1	0.0844418	9.93	8.28024	0.0178793
UBE2T	-0.0145336	9.74818	30.2383	0.270429
ARHGEF25	-0.00376768	9.74851	1.75256	0.78111
PSMC2	0.0981192	9.79748	20.818	0.00756421
INA	-0.105199	9.75407	212.393	3.54078e-06
BMPER	-0.210778	9.7707	179.151	4.67281e-11
GLUD1	0.12329	10.0178	18.0208	0.000156679
CAMK2G	0.0294586	9.78992	2.02798	0.410725
ATPAF2	0.040998	9.78528	4.6369	0.242326
SNAPC3	0.206025	9.90028	48.2253	3.32099e-08
CCDC25	0.205026	9.79798	88.8216	2.50383e-08
RAB39B	0.0162126	9.76957	1.29062	0.600705
MFAP1	0.208415	9.81761	68.3911	5.08524e-08
HAGHL	0.0459237	9.76144	18.7343	0.086167
WNT10B	-0.012747	9.74717	51.8198	0.232199
HMOX2	-0.0229289	9.8107	0.950084	0.540963
GRIN2A	-0.880208	9.90555	1067.83	7.37089e-163
LCMT1	-0.024732	9.8665	0.771322	0.507845
C1orf123	-0.026905	9.80375	1.4341	0.468673
UBB	0.0668053	9.75841	56.6119	0.00607051
CMIP	0.154749	9.87767	26.9008	4.22068e-05
CLTC	0.0664722	10.0251	5.68271	0.038318
AC120114.2	-0.0192251	9.7607	3.44615	0.474899
TMEM127	-0.00655882	9.7796	0.139818	0.847021
CDC37	0.0591631	9.81104	6.28811	0.116447
DUSP14	-0.02678	9.75785	8.58802	0.285128
H2AFY	0.047534	9.8328	3.33418	0.212585
NT5C3B	0.0430095	9.77479	7.24307	0.18739
TACO1	0.071003	9.75879	61.4989	0.00387987
LSM5	0.0926261	9.7923	20.1118	0.0103333
AMZ2	0.0674683	9.78085	14.2516	0.0480631
VGLL4	-0.134114	9.99171	21.1126	3.34575e-05
GMPR2	-0.0146858	9.76904	1.10934	0.634798
GPS1	0.0229787	9.7854	1.47316	0.512728
RNMT	0.0548819	9.9269	3.40774	0.123538
TRAPPC4	0.0973795	9.79123	23.1904	0.00678082
CYSTM1	0.168118	9.78754	70.7019	1.88676e-06
USP1	0.0553774	9.80629	5.73152	0.138903
RPL10P16	-0.0774418	9.75578	88.379	0.00121076
SAT1	-0.32392	9.83922	140.354	1.26089e-18
NDUFB7	0.00584736	9.84534	0.0472498	0.877423
POLR2I	-0.0119323	9.80973	0.248812	0.750248
ORAI2	0.014054	9.761	1.77953	0.599983
NEDD8	0.0303075	9.82488	1.41154	0.425381
FLOT2	-0.0299583	9.77848	2.95008	0.375181
LINC00665	-0.0432823	9.81637	3.13969	0.250325
ZNF428	0.0105187	9.80376	0.214084	0.777288
EGR3	-0.0234457	9.74767	107.304	0.0565557
RUVBL2	0.160239	9.7843	73.1587	3.76559e-06
MYADM	0.0538786	9.81079	5.14089	0.152585
AAK1	0.136398	10.0863	26.3576	7.37267e-06
PRRG3	-0.0380328	9.74868	144.222	0.0100701
HPRT1	0.003698	9.85907	0.0164899	0.921764
MAP7D2	0.0911807	9.77776	27.0971	0.00617273
TTF1	0.0538405	9.81789	4.63045	0.155818
NTMT1	0.0229239	9.75216	18.4305	0.222129
FAM120A	-0.0528844	9.96351	3.3643	0.117064
OSTF1	-0.171487	9.92489	36.3158	7.51622e-07
DMAC1	0.0814095	9.80194	13.0968	0.0283809
POLR2K	0.0334391	9.78137	3.43166	0.329798
DECR1	0.111981	9.8462	16.292	0.00344735
SDCBP	0.0209815	9.80587	0.80366	0.57419
TNKS	0.0506402	10.3575	6.98479	0.0315856
MTERF1	-0.133402	9.98429	19.4169	4.27751e-05
GNAI1	-0.205443	10.3986	125.882	6.31547e-21
NEUROD6	0.000352413	9.74552	8.22316	0.664705
KDELR2	-0.0251612	9.79102	1.5359	0.484019
CLVS2	0.0796888	9.76027	63.4635	0.00183597
C6orf136	-0.0871327	9.76472	48.9927	0.00309868
AL136968.2	-0.00379246	9.7462	23.1005	0.581953
SMIM3	0.00170223	9.74758	0.724378	0.879476
SCAMP1	0.0129017	9.91017	0.187912	0.720533
PTK2B	0.0926502	9.79284	19.3502	0.0104653
HSPB3	-0.00201467	9.74569	70.9022	0.590582
SMIM14	-0.0983665	9.91029	11.6999	0.00565499
RSRC1	0.049557	10.0833	2.98765	0.0998699
MBNL1	0.0229624	10.4167	1.59433	0.305521
PXK	-0.174203	10.552	166.632	8.7412e-19
RPSA	0.0202203	9.99147	0.497423	0.54078
CBS	-0.0601352	9.78033	11.4215	0.0789281
FP236383.2	0.174111	11.0009	326.625	6.25373e-28
ADRM1	0.0560767	9.77276	13.3544	0.0790246
PSMA7	0.128693	9.88856	19.5296	0.000568162
ACOT8	0.0491611	9.76918	12.3064	0.108677
GAB1	-0.119321	10.7454	158.855	9.83706e-12
NNAT	-0.117238	9.75843	146.612	7.58395e-06
FRG1BP	-0.132832	9.79635	38.8109	0.000264135
TMEM230	-0.0621242	9.91068	4.72375	0.0818247
SPCS3	-0.246115	9.88672	79.5315	5.79911e-12
PLEKHA3	0.120852	9.90788	16.4592	0.000973501
HIST1H4C	0.260617	9.8697	79.8156	1.19909e-11
PAIP2B	-0.111191	9.88518	15.2965	0.00224992
TCEA2	-0.0355012	9.78817	3.21059	0.31822
MTIF3	0.0959968	9.8464	12.3975	0.0120339
BNIP3	0.0925865	9.85168	11.1221	0.0152095
UBE2QL1	0.00156924	9.74779	0.513056	0.893796
DDX50	0.0940435	9.88208	10.4495	0.0119086
KCTD4	-0.188453	9.81131	61.8577	3.8471e-07
TCTN1	0.139988	9.77445	80.8114	1.27285e-05
STX1A	0.0162694	9.74982	19.1134	0.291732
PSME1	0.0632693	9.78487	11.2318	0.0703685
SEC16A	0.104445	9.82409	17.011	0.00626973
CD63	0.119979	9.95063	15.6481	0.000619312
RALYL	-0.031742	9.9628	1.00133	0.348565
NR1D2	0.0100126	9.92911	0.115517	0.776981
PRPF38B	0.0135902	9.87465	0.229326	0.715426
KCNMB4	0.0115548	10.556	0.568107	0.567894
SNUPN	0.0587163	9.77305	14.6364	0.0666206
TRIM69	-0.0162811	9.77093	1.1866	0.606498
HNRNPA2B1	0.176671	10.363	94.4088	1.60064e-13
RALBP1	0.131641	9.89774	19.7343	0.00038057
TESPA1	0.0074442	9.74606	198.008	0.1456
NABP2	0.02018	9.76958	2.0242	0.514529
RPL14P1	-0.05461	9.75181	94.5553	0.00559955
RBM27	0.0501702	9.76807	13.8339	0.0964455
CCDC124	0.105744	9.78263	32.8647	0.00213465
HADH	0.1253	9.80317	29.8963	0.000776665
MKRN1	0.0566528	9.82019	5.18178	0.136033
SNX27	0.0701784	10.0715	6.56358	0.0217341
NIM1K	0.0401032	9.85623	1.93464	0.289455
HTRA1	-0.279144	10.1786	150.372	9.79565e-27
PDZD11	-0.0130035	9.75256	5.02052	0.514679
ABRAXAS2	0.0207384	9.79583	0.922145	0.570183
LINC00507	0.00285932	9.74581	81.0918	0.479026
ARPC5	0.0509091	9.94512	3.15547	0.144971
DTD1	-0.00832329	9.77413	0.279848	0.798487
RPS8	-0.0065129	9.9932	0.0513564	0.842859
RALGPS2	-0.139085	9.76941	89.2114	9.9403e-06
SLX1A	-0.0108423	9.74695	48.5556	0.276355
KCNIP2	-0.145558	9.76313	146.269	5.0943e-07
PHYHIPL	0.126918	10.2607	26.9143	8.89996e-07
SLIT3	-0.0247395	9.75741	7.65463	0.316575
RWDD1	0.0642113	9.83744	5.71737	0.0926548
TRAPPC1	-0.0273656	9.75988	7.21943	0.300999
ATAD3B	0.0106485	9.77592	0.421288	0.747287
NETO1	-0.0687142	9.75592	70.2396	0.00412894
SSR4	-0.0465753	9.81736	3.57305	0.216277
TROVE2	0.146618	9.96814	25.4063	2.16646e-05
EPS15	0.01459	10.432	0.776666	0.509397
VPS29	-0.00117616	9.84872	0.00188698	0.975195
CALR	-0.138325	9.78622	52.7437	8.7709e-05
FERMT2	0.20694	10.0688	54.4658	3.85175e-11
NFX1	0.22647	9.93691	56.8685	3.43819e-10
ROMO1	0.0561043	9.77248	13.5002	0.0779948
RABGGTB	0.0371008	9.78852	3.56057	0.29735
RPS7P1	-0.0233018	9.74724	151.702	0.0378191
SPOCK2	-0.0741142	9.76654	30.66	0.0140859
RTCA	0.419439	9.89189	196.477	1.28036e-27
KCNK1	-0.131029	9.87923	20.9482	0.000331882
HBS1L	0.0327012	10.2692	2.29475	0.195295
SHTN1	-0.202039	10.6281	330.882	1.99413e-27
PDCL3	-0.01483	9.76999	1.06495	0.635325
CNIH4	0.00756237	9.81764	0.0934866	0.841493
FBXO28	0.0854416	9.88063	8.33684	0.0223507
CDK2AP2	0.235216	9.80021	109.644	2.12803e-10
RTN3	0.0508365	10.2906	6.443	0.0409813
MAP3K2	0.170706	10.1111	39.1468	1.05983e-08
COMMD8	0.042458	9.76555	11.7234	0.144263
CACNG3	-0.0195662	9.75331	9.22627	0.349548
TIMM10	0.0793621	9.76663	37.5669	0.00680041
SLC25A27	-0.0730981	9.97163	6.69339	0.028372
ETNK1	0.118169	10.1525	21.563	3.23568e-05
GABARAPL2	0.121614	9.93305	17.4242	0.00066236
IRF2BPL	0.0448075	9.76647	11.7466	0.128812
AC091138.1	-0.0385884	9.74745	328.943	0.00149106
SLIRP	0.0398731	9.82089	2.53456	0.293744
IFI27L2	0.113119	9.81297	21.8777	0.0028231
MAP2K1	-0.0706663	9.84343	6.67043	0.0605747
AL163051.2	0.0328121	9.75253	34.8592	0.0845217
CTNNBL1	0.0766371	9.89638	6.79565	0.0375355
CINP	0.110554	9.83848	17.2695	0.00392871
PRKAR1A	0.0158867	9.88513	0.309905	0.66729
RABL6	-0.0448189	9.81013	3.62079	0.231171
ALDH2	0.218083	9.82464	69.9964	1.47844e-08
GRHL1	-0.00876574	9.74874	8.22447	0.536231
FAM57B	0.00199982	9.74682	2.243	0.823254
FTH1P20	-0.0143147	9.74646	170.29	0.0909642
GLG1	0.0796653	10.2235	13.0446	0.00262116
CAMTA2	-0.00122821	9.7768	0.0054165	0.970585
NDEL1	0.133395	9.83806	24.7383	0.00051504
RPS19BP1	0.0641022	9.81924	6.57183	0.0916101
MAPRE2	0.0184664	10.273	0.716735	0.462218
RPL41P2	-0.0106632	9.7496	8.1749	0.498979
U2AF2	0.0739079	9.79309	12.7042	0.0413321
CNDP1	-0.0483462	10.2104	3.38984	0.0656107
RABEPK	0.123075	9.8082	27.1547	0.00107555
MATK	-0.0414963	9.74988	102.609	0.0139077
SMIM7	-0.0433114	9.78496	5.28487	0.216874
YJEFN3	-0.162899	9.77407	100.656	7.37749e-07
MRPL54	0.0546222	9.77373	12.3554	0.0903429
UBAC2	0.0840945	9.93447	7.64029	0.0178047
RAB3C	-0.0404974	9.76403	10.7569	0.160961
[truncated: 14,956 more rows]

## Sheet: oligo_de_cingulate
	logFC	logCPM	F	PValue
AC007325.4	-0.0785219	9.86286	46.7122	0.00805063
TCEAL3	-0.196079	9.93916	44.9047	2.40234e-06
BEX2	-0.418472	9.99041	178.626	1.95729e-26
PGK1	-0.23014	9.9473	58.6095	2.61513e-08
TSPAN7	-0.39781	9.94175	180.005	2.42356e-22
TMSB4X	-0.453956	10.256	246.078	1.00741e-53
MRPL41	-0.225148	9.92453	63.3845	5.73222e-08
GRIN1	0.0299879	9.95476	0.904423	0.475837
PTGDS	-0.791523	10.1821	546.419	1.35936e-118
MAPKAP1	-0.0300707	10.0866	0.873602	0.413781
ATP6V1G1	-0.0792939	9.92935	7.60473	0.0585851
HNRNPK	-0.00686291	10.0798	0.0465184	0.853493
RPS6	0.077529	10.0454	5.06454	0.0464975
EIF3E	0.0942795	10.0452	8.19738	0.0156859
CLU	0.0785504	10.4051	9.39927	0.00414505
NEFL	-0.264607	10.0068	65.8334	1.51467e-11
PTPRN2	0.176741	9.96756	29.482	2.88714e-05
DYNC1I1	0.0553285	10.1809	3.07279	0.0995185
PURB	0.184002	9.96407	34.6033	1.40779e-05
PPIA	-0.320321	10.0582	99.6409	3.49956e-18
CDK13	0.298636	10.3623	156.45	1.60831e-24
NDUFA4	-0.603023	10.0837	366.316	3.177e-67
RRS1	0.0213865	9.85498	13.3468	0.302443
PSMG3	-0.102188	9.87599	33.7647	0.00455037
SYNE1	0.248986	10.1846	71.4315	3.63833e-13
AL356599.1	-0.00291652	9.93418	0.0098627	0.944852
FAM110B	-0.115257	9.87525	44.0153	0.00128215
TSPYL1	-0.399849	9.97548	159.828	1.45597e-23
PPIL6	-0.102449	9.87272	40.1087	0.00329049
HSP90AB1	0.209545	10.44	72.2787	1.02035e-14
RPL10A	-0.234301	9.99047	52.9624	4.66053e-09
ATP6V1G2	-0.325605	9.87785	320.543	6.89541e-19
ZKSCAN8	-0.185495	9.95007	38.8564	7.60661e-06
NOL7	0.025049	9.92581	0.793154	0.552268
TUBB2B	-0.299293	9.91518	114.984	3.29429e-13
FLOT1	-0.0819009	9.93001	8.03086	0.0507492
CXXC5	-0.102329	10.0049	10.0706	0.0103509
MATR3	0.228125	10.3899	102.082	7.30805e-16
VDAC1	-0.266358	9.95462	78.0654	8.87336e-11
MEF2C	-0.307512	10.0312	88.3988	6.18818e-16
SMN1	0.104492	9.9275	13.0207	0.0136394
TCEAL2	-0.399524	9.93129	197.364	2.03342e-22
SMN2	0.0854603	9.93934	8.08088	0.0438751
SUB1	-0.230158	9.98865	53.5501	9.29897e-09
BASP1	-0.340455	10.0059	110.049	2.45522e-18
RETREG1	-0.195543	10.2647	50.7269	7.32705e-11
RPS20	0.00637662	10.0197	0.0374247	0.872522
CPE	-0.0805558	10.1173	6.40174	0.0227649
CISD2	-0.0317044	9.91684	1.36808	0.447818
HNRNPDL	-0.152629	10.3117	36.5684	1.25436e-07
TBC1D1	0.0240033	9.88641	1.27604	0.533823
QDPR	0.112116	10.6917	39.0059	4.72276e-07
ADD1	0.262797	10.3238	95.8943	2.36436e-18
NSD2	0.130105	10.0069	15.155	0.00140617
SLBP	0.569168	10.0352	245.308	7.09441e-43
IQCJ-SCHIP1	0.244867	10.3186	82.1374	4.56174e-16
H1FX	-0.0294528	9.90335	1.34225	0.472091
TCEAL6	-0.276368	9.89201	154.177	2.43457e-12
RAB7A	0.139725	10.1401	19.2638	7.91388e-05
FAM162A	-0.12172	9.90582	22.9825	0.00300407
SHISA5	-0.151269	9.88753	50.9479	9.90077e-05
SETMAR	0.0651613	9.86657	25.5639	0.0358713
PRKAG2-AS1	-0.14418	9.85974	222.524	1.74512e-07
DGCR6L	-0.127042	9.87267	59.6428	0.000271554
DGCR6	-0.128421	9.86767	80.1503	8.58067e-05
SMIM11A	-0.061847	9.91509	5.28447	0.137447
SON	0.00927801	10.2536	0.112297	0.765276
SOD1	-0.0296775	10.1124	0.816746	0.406721
SMIM11B	0.00773818	9.90596	0.0915028	0.851095
TAF1	0.0564938	10.0641	3.02137	0.137877
CDH4	-0.0771421	9.90383	9.05332	0.0595183
RPL32	0.0508902	10.1238	2.32652	0.153454
BLCAP	-0.16858	9.9191	38.2623	4.92521e-05
NORAD	-0.0553169	10.0473	2.89624	0.148887
MAP1B	-0.0444024	10.5182	4.75559	0.0718487
PDRG1	-0.0189354	9.86531	2.27739	0.539802
NSFL1C	-0.0978109	9.92651	12.0047	0.0194245
ITM2C	-0.284159	9.93931	89.6023	5.9969e-12
RPL37A	0.0330091	10.2115	1.17852	0.309454
SPATS2L	0.195654	10.1349	34.6874	4.75187e-08
CHN1	-0.131886	10.139	16.5332	0.000123525
RASGEF1B	0.44947	10.241	200.047	1.2144e-41
ORC4	0.109456	10.0681	10.5949	0.00409381
CMSS1	-0.105388	9.94195	12.566	0.0117422
RPL6	0.0102051	10.0793	0.0937338	0.784138
ANAPC16	0.532289	10.0988	240.466	5.81343e-43
DCTN2	-0.160937	9.95387	28.3897	0.00010297
SRSF5	0.0194367	10.1449	0.395865	0.575645
GPX4	-0.414673	9.98714	171.967	8.22242e-26
CCDC59	0.304111	10.0266	76.7215	7.57798e-14
TPT1	0.240508	10.1239	51.1383	4.14447e-11
MYL6	-0.20999	9.9607	45.109	3.23806e-07
GTF3C6	-0.0112891	9.89465	0.239631	0.777816
CWC15	-0.00100456	9.92129	0.00130752	0.980906
BEX1	-0.639875	10.0104	414.058	1.96676e-64
ATP6V1F	-0.406514	9.91772	224.268	2.75723e-23
PSMC6	-0.053701	9.95556	3.10806	0.198473
FHL1	-0.209869	9.88362	108.814	3.58126e-08
PFDN5	-0.255455	9.98196	65.233	2.17228e-10
ARF5	-0.107862	9.85724	174.792	1.63494e-05
MLLT11	-0.358693	9.89003	270.942	4.17179e-20
RNPS1	0.000318772	9.96248	0.000105256	0.993904
ZCRB1	-0.0963326	9.88913	19.422	0.013864
SSB	0.168556	9.94947	29.6309	7.54424e-05
DYNLL1	-0.229792	10.223	58.9071	1.60027e-13
PFKP	-0.129925	9.89883	28.6274	0.00130558
COPS7A	-0.242542	9.89058	122.46	6.64886e-10
SERPINI1	-0.0706887	10.1965	5.56594	0.0299865
TMEM120B	0.130674	9.87987	49.173	0.000359235
UBE4A	-0.0835673	10.0911	6.79145	0.0216792
NUCKS1	-0.0112883	10.2836	0.175178	0.707975
DNAJB6	0.537628	10.1776	272.452	4.68355e-51
NDUFC2	-0.49633	9.90856	364.099	9.62574e-35
CDC42	-0.267098	10.103	73.5258	3.34441e-14
SUMO2	-0.124954	9.9674	15.6304	0.0024225
RPL35	-0.0920772	10.0519	7.7002	0.0153447
NDUFS8	-0.237434	9.90038	92.4512	4.19196e-09
NRXN3	-0.245567	10.7626	191.463	1.18019e-33
LDHB	-0.127828	10.006	14.8651	0.00130826
ISCA1	0.0360502	9.93762	1.48876	0.393735
FAU	-0.0948822	10.109	8.44977	0.00776672
RPL27	-0.190785	9.97665	35.5814	2.70515e-06
PLD3	-0.170935	10.0826	29.2555	2.65558e-06
CELF1	0.132301	10.0988	16.6936	0.000345835
MPHOSPH10	0.162611	9.93779	30.0425	0.000135848
NDUFB10	-0.386866	9.93093	183.729	4.39963e-21
THYN1	-0.0810019	9.87922	18.6709	0.0284058
LINC00294	-0.0797696	9.87209	25.9018	0.0209508
C11orf58	0.117485	10.0117	12.8157	0.00372211
HLTF	-0.0974156	9.98671	9.38562	0.0165274
PSMA1	-0.139138	9.89306	36.8993	0.000460919
HRAS	-0.244042	9.88598	138.99	2.39844e-10
LRRC27	-0.055058	9.86262	24.1724	0.0604
MRPL57	-0.183597	9.89945	58.5189	5.52099e-06
COX6A1	-0.431898	9.99852	173.716	1.46432e-28
THRA	0.143639	10.0625	19.4482	0.000191371
ZNF638	0.0571721	10.6725	18.0191	0.0106394
ATP2B1	-0.0381383	10.152	1.54395	0.265337
PPT1	-0.0733538	9.90837	8.07825	0.0755034
RPS18	-0.0263463	10.1369	0.656241	0.449574
SCG5	-0.460781	9.99252	217.764	4.70133e-32
HSP90B1	-0.171988	10.0293	28.0695	8.48977e-06
RPL19	0.0312016	10.1068	0.887341	0.389141
YWHAG	-0.206303	10.1188	44.3261	3.1583e-09
PFDN4	-0.0438065	9.88301	4.82832	0.247651
RNH1	-0.111043	10.012	11.675	0.00503366
RNF11	-0.184146	9.98046	34.697	5.59302e-06
YTHDF2	0.0915915	9.93417	9.79978	0.0308109
KCNAB2	-0.112158	9.89623	22.6153	0.005213
ACTB	-0.241973	10.4235	106.573	1.11025e-20
RPL4	0.0570236	9.96029	3.15903	0.174819
ADD2	-0.100342	9.90174	16.4374	0.0137536
MRPL30	0.00207384	9.85647	0.0867946	0.928294
TESC	-0.0679078	9.85933	53.5257	0.0111685
SH3PXD2A	-0.109848	10.1074	12.0861	0.00205837
AP2M1	-0.272213	9.97664	74.8534	1.5544e-11
ACBD7	-0.00352403	9.8512	1.52878	0.805406
CLDND1	-0.00240326	10.4304	0.0104554	0.92825
PFDN2	-0.110477	9.96297	12.7254	0.00758965
BTF3	-0.0650592	9.9567	4.2597	0.118698
AASDHPPT	-0.043432	9.93571	2.26934	0.301614
SGIP1	0.220141	10.3563	78.2815	3.66535e-14
HSP90AA1	0.322523	10.8019	419.579	1.1419e-51
RPS5	-0.0288718	9.99826	0.750721	0.475484
SNX3	0.131054	10.0375	14.9258	0.000906894
YWHAH	-0.810189	10.0098	676.53	5.88022e-105
UBC	0.183161	10.1797	32.7271	8.1837e-08
TPI1	-0.379525	9.94916	150.963	1.47563e-20
EEF1A1	0.0666537	10.2573	4.88591	0.0325757
FAM13A	0.156691	9.95113	24.3932	0.000228943
PPP2R1A	-0.0976312	9.95751	10.083	0.0188361
H2AFZ	-0.117979	9.9352	15.794	0.00479818
C1orf216	-0.179547	9.87215	128.689	2.44837e-07
GPR162	-0.0921798	9.86877	40.3053	0.0053845
NFU1	-0.309839	9.92868	122.592	6.11588e-14
SNCB	-0.351391	9.90987	177.301	6.86517e-18
SELENOW	-0.230297	10.2707	67.7485	9.43228e-15
ZNF252P	-0.0699689	9.89294	9.50609	0.0783741
TKT	0.206868	9.99187	38.5943	6.64961e-07
CFL1	-0.229861	10.0356	46.5219	1.67099e-09
CHD5	-0.00385201	9.90894	0.0214134	0.925867
TCEAL1	-0.00993823	9.88949	0.206263	0.799865
NPM1	0.0476959	10.0145	2.12301	0.234389
RPL11	-0.0239649	10.1524	0.554917	0.484541
MECR	-0.0181877	9.88011	0.943948	0.624037
CSDE1	0.0632747	10.0661	3.89441	0.0960461
TAF13	-0.0565912	9.89016	6.79999	0.150113
CACUL1	0.00261191	10.0017	0.00640245	0.948524
RPL22	-0.00522523	10.0109	0.025038	0.896182
TIMM8B	-0.194621	9.87473	128.742	5.10273e-08
ZSWIM7	-0.0319045	9.91273	1.46113	0.44299
C9orf78	0.0708974	9.90811	7.47569	0.0872613
MRPL33	-0.100013	9.91699	13.4149	0.0162813
TRA2B	0.273773	10.0134	69.0441	2.63455e-11
AJAP1	0.020638	9.9216	0.537133	0.623468
PAPSS1	-0.0109714	10.0419	0.110053	0.776951
RPL3	-0.101132	10.121	9.62819	0.00401563
NCDN	-0.116878	9.94341	15.0973	0.00514098
DNM3	-0.0682728	10.8504	41.2575	0.00051244
BCKDK	-0.0841976	9.86106	65.4827	0.00296478
MRPL20	-0.0344276	9.90701	1.79864	0.403838
PITHD1	-0.104029	9.93377	12.9315	0.0129796
ZNF429	-0.0109382	9.94265	0.133867	0.795033
RPS25	-0.0520854	10.0721	2.40052	0.162593
UCHL1	-0.293181	10.1014	83.5666	7.91736e-17
POLR2G	-0.133109	9.8826	44.4133	0.00043835
UROS	-0.0622932	9.93631	4.48518	0.137944
SRP14	-0.160078	10.1012	23.8162	7.3126e-06
PEBP1	-0.178099	10.3505	47.1854	1.51717e-10
WIPF2	0.0689197	10.0296	4.34975	0.0815694
ESD	-0.0518721	9.9222	3.48445	0.215568
PRDX5	-0.410823	9.9344	200.567	1.1467e-23
ATAD3A	0.0144112	9.87065	0.912675	0.66771
ENO1	-0.11946	9.98846	13.0987	0.00317543
CCDC91	0.0250744	10.1759	0.636047	0.456081
RPS13	0.039573	10.0056	1.34254	0.327734
BZW1	-0.105185	9.93282	13.4122	0.0119996
ACTG1	-0.399304	10.0614	157.047	5.77714e-28
UQCRB	-0.226815	9.99141	49.6706	1.40312e-08
MGST3	-0.272577	10.0245	70.8879	1.34635e-12
TOLLIP	-0.102358	9.925	13.3743	0.0143698
RAB2A	-0.0951813	10.2148	11.1405	0.00283383
SDHB	0.0968496	9.92265	11.7052	0.0218212
PSMD4	-0.0452217	9.94431	2.2548	0.28142
CYC1	-0.164715	9.89286	50.8517	3.30381e-05
DPF1	0.0201919	9.88206	1.0613	0.590888
PSMB4	-0.122835	9.92013	20.0805	0.00319883
BBS4	-0.105201	9.91364	15.4867	0.0112219
HINT1	-0.429051	10.031	179.793	3.72358e-30
RPS27	0.0110124	10.2003	0.116604	0.736725
IRF3	0.0117259	9.87513	0.479921	0.740707
PRDX6	0.122711	9.90691	22.4275	0.00304806
GRM2	-0.00857049	9.85158	7.11686	0.575658
MRPS14	0.107778	9.90051	19.7432	0.00821459
ANKRD2	0.0391647	9.85281	95.9914	0.0178834
RTN1	-0.0714268	10.3224	7.47179	0.0133788
CYFIP2	-0.0294862	9.96778	0.863423	0.477628
HSBP1	-0.129503	9.93947	19.1495	0.00193486
PSAP	0.0362637	10.2743	1.72395	0.235687
MAP1LC3B	-0.131019	9.95365	18.3505	0.00161243
ST6GALNAC4	-0.0154263	9.8522	16.4177	0.358056
RTP1	-0.0528147	9.84959	1452.02	4.07852e-07
DYNC1LI1	0.0730424	9.95803	5.52782	0.0829716
ARHGAP32	0.131407	10.2022	19.7574	7.45869e-05
SNRPN	-0.0597498	9.9356	3.75762	0.154844
SNX10	-0.231641	9.90093	89.168	1.03407e-08
HLA-B	-0.0445511	9.87311	7.16994	0.20113
TMCC2	0.121509	10.0006	13.7228	0.00300814
NDUFS5	-0.420659	9.99051	180.401	1.04007e-26
RTL8C	-0.358464	9.91987	172.099	2.5503e-18
APOE	0.143701	9.97967	17.8232	0.000584013
BROX	-0.035489	9.97453	1.21667	0.390105
TRIR	-0.00132125	9.93048	0.00202335	0.975
PPA1	0.357715	10.1633	118.681	6.62733e-24
GPRASP2	-0.100361	9.86408	69.6556	0.00102294
SLC29A3	0.00451914	9.87793	0.0632029	0.901228
PREPL	-0.0825437	10.1392	7.25129	0.0168521
PDCD2	-0.0238867	9.87807	1.77	0.51309
LIPA	-0.330398	10.1261	122.089	3.34936e-22
CMAS	-0.235734	9.91523	79.5428	1.10481e-08
TSC22D1	-0.0156837	10.2276	0.286313	0.621596
CALM1	-0.188074	10.5954	110.984	2.16332e-16
SPINT2	-0.243088	9.99893	60.5488	8.50975e-10
NDUFB1	-0.313656	9.93407	115.996	2.91845e-14
SH3BGRL3	-0.0761834	9.87227	21.7829	0.0277381
RPS7	-0.0584168	10.0578	3.089	0.122944
SPIN3	0.2695	9.9283	82.5673	2.84645e-10
FSTL5	-0.160458	9.90685	37.4202	9.16794e-05
RAB1A	0.0610108	10.0585	3.50853	0.111412
FAM204A	-0.13103	9.94971	18.7727	0.0016454
MEG3	0.555193	10.1367	265.364	5.92508e-50
CRIP2	-0.134009	9.87683	55.8625	0.000225247
SF3B3	0.0515488	9.94756	2.89455	0.22236
PKM	-0.181951	9.99828	30.4661	5.04293e-06
PSMC5	-0.0808068	9.91836	8.63947	0.0527339
RCN2	-0.236086	10.017	56.3683	1.28828e-09
RPS14	-0.112467	10.1048	11.5908	0.00165028
RABAC1	-0.342472	9.94126	128.977	7.87674e-17
RPS17	-0.0876908	9.87254	22.699	0.0116202
SNCA	0.0793068	10.1638	6.01089	0.0207207
NME4	-3.37934e-05	9.86431	7.99839e-06	0.9991
FBXL16	-0.14779	9.88912	46.3252	0.000158726
BEX4	-0.271701	10.002	72.1505	5.29864e-12
CALM3	-0.96644	9.98477	1064.2	3.60171e-144
ANXA2	-0.00217987	9.85168	0.435465	0.887255
BAIAP3	-0.0523831	9.85642	52.2814	0.0267634
PPP1R1B	-0.0548975	9.86698	16.2911	0.0867616
ELOB	-0.361748	9.98162	127.199	1.163e-19
CNTNAP1	-0.0960301	9.86906	43.8583	0.00390234
SNN	-0.252766	9.87737	199.581	4.73893e-12
RPL12	-0.14155	9.9702	19.9375	0.000564979
C16orf45	0.0686054	10.0119	4.24095	0.0886854
FOXP4	-0.00515594	9.87373	0.0999403	0.882757
ALDOA	-0.553958	10.0807	295.453	3.88857e-56
PSRC1	-0.20535	9.92847	52.4005	7.84466e-07
HPCAL1	-0.17832	9.92618	39.1836	1.84094e-05
TRIAP1	-0.0467163	9.85981	24.0064	0.0838239
FBXL19	0.0253512	9.8842	1.60593	0.505623
AP2S1	-0.198655	9.91125	56.0077	1.41025e-06
MT1G	0.285868	9.89761	134.221	1.26363e-12
PAFAH1B1	0.0244296	10.3468	1.12248	0.392906
DGKZ	-0.186857	9.92615	43.9363	7.09055e-06
RABEP1	0.241888	10.1344	57.9579	1.94515e-11
SOX15	-0.0164577	9.85603	5.58697	0.469646
SRRM3	0.160087	9.88005	73.5453	1.19027e-05
EIF1	0.127494	10.2789	17.5102	3.46454e-05
G6PC3	-0.134581	9.86694	97.7063	3.16462e-05
NSG2	-0.417316	9.91515	244.738	1.48695e-24
NSF	-0.056282	10.1091	3.17049	0.115789
GAP43	-0.488976	9.97563	239.979	6.24047e-35
DDX5	0.222524	10.3729	86.3063	8.41348e-15
KCND2	0.214811	9.97637	43.7121	3.46652e-07
ARPC2	-0.128902	9.96109	17.3846	0.00183361
RPL38	-0.166049	10.0582	25.4752	9.15988e-06
WBP2	-0.187967	10.0031	34.4751	2.14295e-06
QKI	-0.0257045	11.1677	10.4383	0.119391
AC016588.2	-0.0144351	9.85418	7.15487	0.474746
APP	-0.0861252	10.7215	49.5205	5.15137e-05
OAZ1	-0.160857	10.0642	23.3853	1.5315e-05
RPS4X	-0.0660763	10.0381	3.9027	0.0874899
RTN4	-0.0344192	10.745	8.54535	0.102662
PPDPF	-0.508263	9.93633	286.868	7.25327e-36
ARF3	-0.477665	9.91634	327.267	7.55606e-32
THOP1	-0.0408512	9.8838	4.15861	0.283272
LGALS3	0.0968396	9.86048	108.029	0.000187214
EEF2	0.054245	10.0447	2.69513	0.162942
UBL5	-0.342769	9.97514	117.137	1.44565e-17
CLIP2	0.144763	10.2292	24.6597	7.66204e-06
PIN1	-0.342442	9.92376	150.557	8.80258e-17
RPL13A	0.0416535	10.1321	1.53771	0.237999
AL078621.3	-0.000136391	9.85084	0.0029709	0.991803
RPS11	-0.0474253	10.0171	2.0712	0.231364
EPDR1	-0.215949	9.87781	143.141	3.91074e-09
ZNF814	0.00604894	9.92599	0.0450751	0.885762
ITGB1BP1	0.10154	9.94867	10.9144	0.0165895
GPM6A	-0.131192	10.1934	21.202	5.27405e-05
VSNL1	-0.429014	10.0092	175.95	8.35207e-29
SLC25A4	-0.250451	9.9333	73.6647	1.52099e-09
STMN1	-0.37459	10.182	152.004	1.01254e-31
CALM2	-0.234101	10.4091	93.9889	5.2604e-19
PIK3R1	0.0821776	10.3512	11.5098	0.00417903
PRKCB	-0.210831	10.1197	44.8642	1.34474e-09
OIP5-AS1	0.00954628	10.06	0.0866471	0.801966
BCYRN1	-0.0880079	9.95573	4.94962	0.0345705
RPS27A	-0.178842	10.1457	31.7441	1.3575e-07
DYSF	-0.10251	10.1361	9.9557	0.00302829
TMSB10	-0.714774	10.0599	512.534	1.50632e-90
MOB1A	0.104995	9.92595	13.6613	0.0131274
PNMA6A	-0.0755052	9.85791	83.1753	0.00303682
IDS	-0.111762	10.1353	12.5031	0.00122406
HS6ST2	-0.0645425	9.86017	44.0505	0.0188056
NDUFA1	-0.431094	9.94592	208.885	3.5938e-26
FAM199X	-0.047583	9.93215	2.75042	0.257561
TCEAL7	-0.280802	9.91738	108.953	9.4951e-12
ARMCX1	-0.029195	9.86824	4.37449	0.370504
PCSK1N	-0.410001	10.0204	157.743	5.56007e-27
RPL9P7	-0.0480548	9.86015	21.3546	0.0787374
HDHD3	0.0615088	9.86357	29.4962	0.0342066
CTSL	-0.0539063	9.93113	3.46393	0.19939
YWHAZ	-0.289372	10.2137	106.972	1.90972e-20
SNX16	0.188786	9.89377	69.4678	2.07716e-06
FABP5	-0.207293	9.88075	116.406	3.08703e-08
ATP6V1H	0.0311224	10.0139	0.87286	0.437336
AC120036.4	-0.0316786	9.85424	33.1523	0.123071
PPP2CB	0.242538	10.0018	53.2136	4.63416e-09
DPYSL2	-0.154975	10.6725	133.972	1.1492e-12
AC090114.1	-0.0196149	9.85371	14.1108	0.315441
RUNDC3B	0.170606	9.87983	84.2459	2.83462e-06
PCLO	0.234088	10.0111	47.9054	1.13211e-08
CHCHD2	-0.318619	9.99279	102.102	8.4635e-16
STMN2	-0.504979	10.0242	246.043	4.46256e-41
YKT6	-0.134632	9.8748	64.2864	0.000160705
SOD2	0.0122259	9.98912	0.143987	0.765382
GTF2H5	-0.210289	9.90288	71.9812	2.30946e-07
PCMT1	-0.150075	10.0376	21.5678	9.13742e-05
LMBRD1	-0.102526	10.0553	9.96494	0.00668304
RPL7L1	-0.0801134	9.93486	7.63041	0.0561205
TUBB2A	-0.847199	9.9578	792.628	5.68874e-104
CPEB4	0.150879	10.2687	32.0275	1.3013e-06
ATP6V0E1	0.137741	9.97681	17.7504	0.000998709
PDP1	-0.263872	9.89178	141.66	2.19023e-11
RPL10P9	-0.492979	9.89195	459.118	1.73351e-36
SLC6A7	-0.0171727	9.85966	3.42107	0.518871
CXCL14	-0.172862	9.88729	64.6747	8.40768e-06
UQCRQ	-0.286643	9.91233	112.403	2.834e-12
REEP5	-0.0625386	10.0163	3.73342	0.114244
AC093591.1	-0.0158292	9.85318	10.6704	0.394783
GAR1	0.0221531	9.86215	4.3337	0.434598
FAM47E	-0.133034	9.86143	159.746	4.11274e-06
SEL1L3	-0.0450662	9.85824	28.0815	0.0775834
SSBP1	-0.0472484	10.0111	2.17219	0.236027
LETM1	-0.0502498	9.89951	4.24594	0.215517
HES1	-0.00199752	9.85181	0.341722	0.898558
NDUFB5	-0.245646	9.93102	74.431	3.14752e-09
EIF2A	-0.00648255	9.88164	0.114199	0.862763
PHACTR1	-0.0876393	10.1835	9.07614	0.00780684
LPP	-0.0936196	10.217	10.3516	0.00326142
PODXL2	-0.0530632	9.89796	4.95892	0.189044
TPRA1	-0.0241674	9.87514	2.01231	0.496647
LSAMP	-0.0235801	10.6532	1.93805	0.293413
RPL14	-0.111476	10.0429	11.7045	0.00359469
CHL1	-0.102119	9.958	10.595	0.0139556
ZNF483	0.0782841	10.1796	6.80746	0.0202879
XRCC6	-0.0420453	9.96428	1.82598	0.311937
CSNK1E	-0.0453914	9.92912	2.51531	0.279966
LGALS1	-0.307605	9.89421	174.875	8.9151e-15
TIMP3	-0.00270278	9.85802	0.108643	0.913414
DRG1	-0.0520229	9.91268	3.90632	0.210534
NOL4L	-0.0430911	10.0481	1.70859	0.261031
FTH1P10	-0.44719	9.8946	305.734	9.33146e-30
MTERF4	0.00406195	9.88821	0.036748	0.916954
COPS9	-0.264358	9.95012	74.1515	1.37264e-10
PTMA	0.0729411	10.5005	9.86228	0.00404832
SP100	-0.0612493	9.88765	6.15479	0.115185
SERPINE2	-0.118877	9.89697	24.9456	0.00312605
C2orf69	0.0241754	9.92431	0.748654	0.565922
HIBCH	0.313785	10.3288	140.488	2.22599e-25
KIF5C	0.0193966	10.2346	0.469358	0.540589
CCDC115	-0.0574108	9.87185	13.3111	0.0949994
RPL31	-0.0934183	9.97274	7.90775	0.0231757
MGAT4A	0.0464239	10.007	1.97286	0.250586
COX5B	-0.260111	10.009	62.4046	3.03769e-11
BCAP31	-0.123843	9.90103	25.1261	0.00230589
RPL13AP25	-0.0125637	9.87712	0.379379	0.7285
HCN1	0.187718	9.91861	45.0113	8.83358e-06
NUDT4	-0.081442	9.89684	11.9298	0.0430225
TIMM13	-0.233505	9.89485	101.833	4.64475e-09
LGMN	-0.00759081	9.90422	0.0920183	0.853325
HIKESHI	0.00506401	9.9453	0.028214	0.90431
GRIA3	-0.0375144	9.96474	1.37991	0.366975
SYT17	-0.0521478	9.87203	10.8138	0.130005
STARD3	0.0482658	9.89292	4.50089	0.22472
MTCH1	-0.106065	10.0862	11.0071	0.00367002
PAPOLG	0.0150833	9.93313	0.268811	0.720805
AP003170.4	0.000622524	9.84987	0.150925	0.951549
EMC9	-0.057484	9.85848	43.7093	0.0263534
TUFM	-0.0226138	9.92741	0.599824	0.590764
VBP1	-0.077926	9.91093	8.9548	0.0598644
PSMB5	-0.132064	9.92874	20.8433	0.00157224
SBNO1	0.207229	10.0578	37.8156	1.0505e-07
AC064799.1	-0.2062	9.87989	102.787	3.04663e-08
HIP1R	0.0105958	10.1429	0.122641	0.760504
CHPT1	0.251762	9.90947	88.9739	1.58404e-09
POLR2D	-0.0138725	9.89592	0.363213	0.729886
DNAJC4	-0.104357	9.86486	70.5587	0.000778224
AL118558.4	-0.0147461	9.8503	52.0631	0.226614
GLRX5	-0.156443	9.8835	61.1898	3.95741e-05
UBE2B	0.354516	10.1258	116.589	6.91222e-22
AL035071.1	-0.131722	9.86915	82.0642	8.10908e-05
B4GALNT1	-0.0765474	9.8597	65.1145	0.00482352
RPS29	-0.16403	10.0616	24.6856	1.09032e-05
KIF5A	-0.329823	9.99034	104.147	8.90698e-17
HCFC1	-0.0319141	9.87669	3.33693	0.376689
RPL21	-0.0852346	10.154	7.01825	0.012142
KLRG1	0.0699929	9.90224	7.92681	0.0873858
PIANP	-0.195724	9.86987	172.567	7.64545e-09
NDUFS4	-0.222239	10.0214	47.685	9.90139e-09
ZFP28	-0.0350023	9.8713	5.17621	0.304299
NRGN	-0.634711	10.0218	389.931	5.68833e-65
CCDC82	-0.0407859	10.0425	1.62988	0.290508
GMFB	-0.100987	9.90502	16.5433	0.0137651
DYNLRB1	-0.00344364	10.0906	0.0115483	0.92533
HNRNPC	0.200529	10.3671	73.1206	2.96722e-12
AC113935.1	-0.154911	9.91791	29.2565	0.000191526
HSPA8	-0.281784	10.0782	74.9446	6.56144e-15
SCAF1	-0.011092	9.89381	0.238862	0.780983
RAD54L2	-0.0872213	10.0005	7.20733	0.0298071
EPHX1	0.0698885	9.94005	5.25921	0.0989687
ISCU	-0.336319	9.92269	148.896	3.07745e-16
C2CD2L	-0.0661202	9.86752	23.2333	0.0412256
BRSK1	-0.0078215	9.93004	0.0747485	0.852695
NSG1	-0.229708	9.86519	323.304	3.83608e-13
VAMP2	-0.194599	10.1716	37.9326	3.51449e-09
TPM3	-0.211545	9.94675	50.4689	3.27116e-07
GSTM3	-0.0248568	9.8689	2.97928	0.450099
SLIT1	-0.073721	9.88386	13.2402	0.0530792
EIF1B	-0.062216	9.95519	4.0711	0.136077
TTC3	0.102646	10.4372	25.5111	0.000126074
RPL18	0.0174336	10.139	0.289663	0.617791
CCT3	0.334504	10.0068	98.2988	8.52375e-16
CSNK2B	-0.117969	9.87953	37.9422	0.00146744
ASPHD1	-0.193749	9.90066	64.998	1.71819e-06
PCSK2	-0.119437	9.906	21.4477	0.00360819
ZNF271P	0.117709	9.97652	13.3014	0.00485261
HIGD1A	-0.156456	9.87938	68.6139	2.44263e-05
NDUFB8	-0.330178	9.91661	140.354	8.95707e-16
TIPIN	-0.043101	9.88787	4.05849	0.268081
AFG3L2	-0.110379	9.91459	17.2876	0.00784505
RPL9	-0.122688	10.0888	14.4786	0.000734388
CRYAB	0.00218341	10.4819	0.00518638	0.94259
NDUFS2	-0.0590693	9.98532	3.4248	0.148017
SARAF	-0.00920049	10.1249	0.0826342	0.79474
MORF4L1	0.0309478	10.1175	0.971574	0.387495
S100A6	0.0446911	9.94954	1.89919	0.289553
RPL13AP5	-0.035081	9.86463	7.0884	0.250938
AC024293.1	-0.0372445	9.86834	6.38992	0.254534
CCK	-0.926414	10.0182	883.414	7.19471e-142
YAF2	0.273073	10.0385	62.6011	9.24826e-12
USP14	0.0817081	10.0769	6.51471	0.0299868
ERI3	0.253391	10.0595	57.2915	9.10503e-11
RSU1	-0.00718181	9.96704	0.049364	0.863
SARS	-0.0469299	9.99909	2.12847	0.244861
RPS21	-0.0901542	10.0368	7.24831	0.0195993
AKR1A1	-0.0416727	9.89194	3.52688	0.292772
APH1A	-0.161653	9.8725	102.127	3.6025e-06
CDC5L	-0.0879677	9.98458	7.786	0.0308847
PMVK	0.0499268	9.89648	4.53273	0.215046
ATP6V0B	-0.204236	9.99331	39.1862	3.27126e-07
SNX7	-0.0215335	9.87209	1.84813	0.530866
ERCC1	0.0520919	9.90016	4.5717	0.200763
RSL1D1	0.0848286	9.89764	12.924	0.0358645
ARFIP2	-0.001866	9.86968	0.0161786	0.955163
OSCP1	-0.0374891	9.86068	14.0833	0.175812
PGAM1	-0.309622	9.95476	103.112	3.86628e-14
HSPA9	0.350126	10.0218	108.215	1.49664e-17
TOP2B	0.0304704	10.1035	0.928382	0.402074
RTN4R	-0.16257	9.85845	346.079	8.99701e-10
PPP1R12A	0.0931467	10.1433	9.13136	0.00794261
OPTN	-0.0246562	9.96854	0.603065	0.552598
ADCK1	-0.145003	9.92197	28.112	0.000499373
CKB	-0.126845	10.2177	17.0615	6.21642e-05
PHKG2	0.0584226	9.87031	15.5817	0.0781477
TOMM20	-0.204157	10.0328	41.5364	1.02315e-07
PRAF2	-0.153516	9.86983	100.471	5.5097e-06
HK1	-0.0562232	9.89044	6.45452	0.153272
TRUB1	0.0242171	9.89689	1.07909	0.548069
TALDO1	-0.234157	10.0022	53.9539	3.13319e-09
LAMA4	-0.114569	9.86051	129.697	4.49787e-05
CDC42SE2	0.0905507	10.2492	10.3013	0.00407128
SUPT16H	0.0614562	9.94907	4.10394	0.145825
MRPL32	-0.0515202	9.8821	6.88989	0.171535
SAP18	-0.176622	9.93489	36.4441	2.24152e-05
VDAC2	-0.0098945	9.9372	0.110406	0.814363
SPCS1	-0.421578	9.91588	252.447	5.13932e-25
RPS24	-0.00561165	10.1094	0.030278	0.876093
PACSIN2	-0.0449695	9.92538	2.48343	0.283915
AARS	0.145142	10.0029	19.5043	0.000394808
CCDC186	0.0575442	9.9501	3.53295	0.172963
TIGD5	-0.0116088	9.85723	2.31396	0.630207
GREM2	-0.0537825	9.85687	51.1148	0.026138
BORCS8	-0.106686	9.87483	39.9774	0.0027561
CHGA	-0.044773	9.89375	3.74547	0.261494
SLC7A8	-0.13405	9.86518	111.585	1.92294e-05
GTF2A2	-0.042217	9.90412	2.83103	0.30327
AC245140.2	0.00173744	9.85282	0.166689	0.921345
SCRN1	-0.0335058	9.96482	1.15605	0.420509
PHF21A	0.238809	10.2794	74.6396	1.99013e-14
OTUB1	-0.296404	9.89737	157.305	1.31119e-13
BORCS7	-0.0283445	9.904	1.27111	0.489531
SYNGR1	-0.141919	9.92286	25.9396	0.000661539
RPS15A	-0.214706	9.93824	50.2609	2.33817e-07
NUS1	-0.144628	9.91867	28.3426	0.000504119
LMAN2	-0.074253	9.89287	10.9118	0.061686
CA10	-0.0883045	9.89025	15.3134	0.0247672
GNAS	-0.0355773	10.2623	1.6756	0.245848
SCAMP5	-0.109656	9.96478	12.2915	0.00797541
KIF1A	0.0260956	10.0775	0.648175	0.485299
NR2F6	-0.0428766	9.86921	8.74191	0.195836
RPL28	-0.225236	10.1481	51.2366	2.24985e-11
NME3	0.0889477	9.96719	7.92055	0.0340238
RPS2	0.169141	10.1199	25.0019	3.16221e-06
SYNGR3	-0.0962332	9.87306	34.684	0.0059287
ZNF385A	0.0151568	9.85439	7.67298	0.447812
METTL9	-0.0426406	9.90633	2.79114	0.300457
MCOLN1	-0.0136234	9.88044	0.517096	0.714132
TSC1	0.0589697	10.0403	3.23936	0.131339
TERF2IP	0.0382153	10.081	1.41307	0.30556
ACTR2	0.0132096	9.99927	0.166129	0.744813
NLRP1	-0.386989	9.90556	240.743	1.1694e-21
PFN1	-0.10569	9.91141	14.826	0.0106498
FAM49A	-0.120098	9.91383	19.7917	0.00377465
C1QBP	-0.0157881	9.89305	0.482094	0.69147
LDLR	-0.130938	9.93984	18.8686	0.0017183
Z74021.1	-0.0169801	9.85146	26.3194	0.265066
TXNDC17	-0.036791	9.86859	6.64208	0.262166
KRT10	-0.0351926	9.92384	1.53763	0.401642
ZFP82	0.036225	9.92426	1.64724	0.389972
TUBG1	-0.0507275	9.85811	36.2675	0.0463075
SUV39H1	-0.0196417	9.85213	27.2099	0.239992
CACYBP	0.346848	10.002	105.156	1.06129e-16
PRMT1	-0.15403	9.9067	36.5434	0.000173545
HDAC5	0.07447	9.98126	5.41599	0.0725747
TCEAL5	-0.259062	9.88174	179.482	6.05495e-12
SEC62	-0.334207	10.1408	117.491	2.1824e-23
MYDGF	-0.269578	9.89151	146.404	7.65462e-12
NAA10	-0.0793638	9.88381	15.4923	0.0372693
FXYD6	-0.281301	9.90335	124.148	4.03905e-12
ZNF470	0.0408986	9.87988	4.81706	0.267856
GAS7	-0.222325	10.2254	61.1098	8.68079e-13
METTL23	0.0487104	9.88264	6.20757	0.19582
ITM2B	-0.153261	10.2407	27.9157	6.88825e-07
CES4A	0.0237202	9.99193	0.542042	0.561922
IER3IP1	-0.0581623	9.86287	26.2034	0.0488025
RPL10	-0.0425353	10.1789	1.78068	0.201188
GCA	-0.0969245	10.0056	9.36782	0.0151406
ST8SIA3	-0.0564537	9.8872	7.09217	0.145611
ABHD17A	-0.154399	9.94513	27.5613	0.000208236
CHML	-0.040363	9.85906	20.5504	0.124699
LSM7	-0.0554321	9.89355	5.90156	0.164144
RPL36	-0.0492652	10.0608	2.15517	0.192255
DYRK1A	0.242433	10.263	77.6899	2.07674e-14
ILF3-AS1	0.0255683	9.92083	0.838416	0.542916
ASNA1	-0.166352	9.87628	87.0589	4.3062e-06
HSDL1	-0.0630134	9.88307	10.256	0.0965991
IER2	0.0254955	9.86372	4.90208	0.387442
VSTM2B	-0.427576	9.95769	202.093	4.15626e-26
COX7A2L	-0.113549	9.93949	14.6918	0.00662669
C19orf53	-0.153615	9.90797	34.6399	0.000185988
TECR	0.147252	10.0864	19.4149	8.74298e-05
DDA1	-0.117581	9.88291	35.4088	0.00193219
RPL18A	0.063362	10.0561	3.36155	0.09925
SYMPK	0.0486983	10.0055	2.27061	0.228928
TMEM59L	-0.433005	9.95275	207.077	1.37088e-26
TRIM37	0.0354187	9.99556	1.17505	0.385481
PPP1R37	-0.0427311	9.8668	10.2792	0.180283
ANKMY2	0.0294946	9.90082	1.45566	0.469455
PNMA8A	-0.191388	9.88618	85.4018	7.10181e-07
PNMA8C	-0.3201	9.86974	469.775	4.1635e-21
TMEM160	-0.549809	9.92075	423.81	6.9995e-42
FTL	-0.0348895	10.4918	1.97341	0.166295
C2orf68	-0.196465	9.97518	34.0129	1.37908e-06
SIK3	-0.0987671	10.9268	86.0074	1.27764e-07
SLC17A7	-0.305557	9.937	110.179	1.30942e-13
GTF2I	0.225687	10.3329	84.8314	2.94655e-14
KLK7	-0.0414692	9.85396	60.2105	0.0407024
TAPBP	-0.132765	9.93613	20.5048	0.00148655
PEA15	-0.000315032	10.0045	9.22803e-05	0.993715
COX4I1	-0.423183	10.032	169.99	2.05146e-29
SUPT7L	0.021067	9.89031	0.939348	0.592218
RPL9P9	-0.122369	9.8832	32.6813	0.00127739
URI1	-0.012961	10.1968	0.19057	0.692591
C1D	-0.0694133	9.91542	6.69188	0.0954838
WASH6P	-0.137951	9.86942	84.1125	3.94904e-05
RPL39	-0.114246	9.97551	12.4935	0.00530275
COX7B	-0.34377	9.94044	137.144	6.10799e-17
SYN1	0.0251059	9.93279	0.724617	0.552187
SLC25A6	-0.240063	9.92607	71.1533	7.0447e-09
ASB6	-0.0343957	9.87316	4.46359	0.323547
FRRS1L	-0.174475	9.92495	38.437	2.77215e-05
DIRAS2	-0.300139	9.89324	177.373	3.30785e-14
RORB	-0.0395377	9.8977	2.62035	0.327517
WASHC1	-0.0935348	9.91157	12.5144	0.0239137
ENY2	-0.0279281	9.94444	0.857197	0.506436
PLGRKT	-0.247237	9.91692	83.6354	2.10926e-09
NEFM	-0.0284886	9.94711	0.85346	0.497546
RHEB	0.0184798	9.97807	0.326009	0.655139
FAM3C	-0.287602	9.93264	103.25	3.49094e-12
RPS3AP26	-0.000631262	9.85048	0.0780346	0.959002
RPS3AP25	0.00802032	9.85273	3.66262	0.642793
BEX3	-0.578144	10.0291	325.344	1.46261e-54
APTR	0.0413852	9.91695	2.28073	0.323493
C7orf50	-0.103951	9.92154	14.0049	0.0127714
PRKAR1B	-0.206628	9.93871	48.7157	6.58059e-07
C6orf203	-0.00396843	9.88246	0.0412523	0.916176
HMGN3	0.0237719	10.0602	0.528075	0.5327
BEND6	-0.145854	9.90647	32.0844	0.000377374
CUTA	-0.249992	9.92179	78.0443	1.53118e-09
QRSL1	-0.0826976	9.91473	9.62087	0.0467146
MCUR1	-0.0640555	9.89263	8.08737	0.106696
LYRM4	0.114145	9.96174	12.532	0.00681511
ECI2	0.0449393	9.87149	8.62562	0.183693
AC140125.2	-0.0627924	9.8515	356.268	9.76389e-05
PDLIM7	0.0166184	9.8547	8.45782	0.415731
KIAA1191	-0.147277	9.88168	58.756	9.1631e-05
AC139491.1	-0.0138912	9.85183	15.2627	0.385124
LNPEP	0.0465592	10.0518	2.03134	0.227115
KIF2A	-0.0173484	10.167	0.340337	0.607608
MAP9	-0.153665	9.89385	45.7119	0.000113742
RPS3A	-0.120617	10.0253	13.2344	0.00198115
CCNI	-0.11458	10.0769	12.6504	0.00187725
PGRMC1	-0.233051	10.0052	52.4514	3.32995e-09
TMEM165	-0.142489	10.7886	125.106	1.87844e-12
OPA1	0.112026	10.0399	11.5667	0.00438191
PFN2	-0.434623	9.94782	217.116	1.22706e-26
ATP1B3	0.349983	9.99043	107.376	1.1301e-16
ZCCHC10	0.0396504	9.89242	3.10069	0.317649
COX17	-0.105529	9.91488	15.2606	0.0110685
ZNF786	0.0323962	9.87033	4.76487	0.330991
PSMD6	-0.0212477	9.89373	0.877453	0.594163
SEC13	0.0331172	9.90355	1.74691	0.419741
BRK1	-0.259551	9.91818	89.7075	3.23431e-10
CRELD1	0.0437511	9.90612	2.89572	0.289156
MLC1	-0.0496451	9.85811	34.3788	0.0511309
CD99L2	-0.233521	9.99799	53.942	4.03407e-09
SNU13	-0.244836	9.93281	71.122	3.54519e-09
UQCR10	-0.412712	9.94959	186.81	3.80447e-24
XBP1	-0.0172065	9.87282	1.13263	0.619451
S100B	-0.638879	10.0796	419.476	4.93698e-75
PIGP	0.00868674	9.89845	0.132583	0.830156
SLC13A3	-0.458205	9.9993	211.157	3.95255e-32
RBM39	0.140896	10.3045	31.3428	2.91445e-06
MAP1LC3A	-0.279209	9.96821	79.1984	6.37107e-12
CST3	0.0303251	10.0295	0.726906	0.441701
MORF4L2	0.434613	10.06	165.174	1.14542e-27
COPS7B	-0.00417923	9.90529	0.0276149	0.919099
SRI	-0.137994	9.92432	23.9429	0.000939284
PPP2R2C	-0.221629	9.99962	47.4038	2.31957e-08
MZT2A	-0.378539	9.90979	209.243	1.42663e-20
HSPE1	0.288353	10.0215	66.7278	1.59547e-12
MZT2B	-0.36332	9.94248	151.136	8.1089e-19
RMND5A	0.116565	10.0776	11.9078	0.00202452
PPP3R1	-0.292137	9.88628	206.129	3.48609e-14
MAPKAPK5-AS1	-0.0216062	9.87929	1.37012	0.557979
ATP2B1-AS1	-0.0983739	9.86006	102.271	0.000366253
SEZ6L2	-0.201128	9.97959	39.2824	6.91814e-07
RND1	-0.0591632	9.85623	68.478	0.0118307
RPL41	-0.305256	10.1901	96.3236	1.18004e-21
IGSF21	-0.13634	9.87628	59.5084	0.000162815
MAGEH1	-0.25456	9.90627	99.2229	4.41305e-10
RPL5	0.03584	10.0512	1.16511	0.352262
SYT10	-0.0410963	9.85345	70.184	0.0346769
ST13	0.494344	10.1293	217.37	5.82656e-40
EVL	-0.0499613	9.97761	2.3633	0.224572
SECISBP2L	-0.0834662	10.3423	12.0349	0.00321936
ENO2	-0.498051	9.9861	258.751	6.20165e-37
AC215219.1	-0.181745	9.911	47.3131	1.03203e-05
APLP2	0.0984669	10.0425	8.57271	0.0119044
MAOB	-0.0880072	9.86747	40.0315	0.00669645
RPA3	-0.109964	9.85982	129.937	6.28732e-05
THY1	-0.363868	9.94512	145.356	6.54752e-19
ISY1	0.0271024	9.86225	6.38289	0.339611
ATP1B1	-0.0729194	10.5439	12.6238	0.00249483
WIPF3	-0.104493	9.88355	26.1963	0.00604362
CHORDC1	0.916229	10.1874	673.626	7.4069e-134
HACD3	0.0116185	9.99368	0.126116	0.775785
COA5	-0.0189896	9.90063	0.617959	0.640937
PLEKHB1	-0.0228332	10.0453	0.47087	0.553554
TMEM147	-0.10695	9.8851	26.0931	0.00534195
PEX16	-0.16149	9.88406	64.2256	2.34534e-05
GSTP1	-0.213957	9.95436	47.7954	2.14476e-07
AQP4	0.0760552	9.91983	7.21798	0.0708058
BDNF	-0.0949266	9.85289	425.281	7.18329e-07
2022-09-04	-0.412727	10.0924	172.147	6.62685e-32
AC116533.1	-0.053961	9.86803	12.6818	0.0979352
PSMB7	-0.113752	9.98375	12.7297	0.00517897
PPCS	-0.10736	9.87339	43.4496	0.00223621
ATP6V0D1	-0.118523	9.93849	16.1299	0.00459029
SYT1	-0.0871235	10.3609	11.7691	0.00176506
DCAF10	0.0162181	9.88943	0.567865	0.678911
DKK3	-0.287815	9.95233	87.9144	2.38198e-12
NUDC	0.239987	9.99648	52.4049	7.82204e-09
EIF4A2	0.0245822	10.0662	0.550643	0.516111
RPLP2	0.0241411	10.0827	0.504478	0.516077
CEND1	-0.287439	9.90718	124.812	1.82547e-12
INPP4A	0.0606978	9.92839	4.342	0.151067
PRPSAP2	-0.129054	9.98328	16.7104	0.00149913
TRMT112	-0.0566642	9.91369	4.31997	0.173034
ADPRHL2	0.026949	9.88586	1.70838	0.483466
RPL34	-0.140736	10.0834	17.8477	0.000114686
PLGLB1	0.0174069	9.87309	1.18432	0.615156
SSU72	-0.053657	9.95815	3.01978	0.198189
SLC2A11	-0.0202881	9.87712	1.30948	0.575306
CHCHD5	-0.114718	9.86597	77.4985	0.000301796
PSMB2	-0.15196	9.94157	26.4099	0.000266962
SLU7	-0.0306503	9.91686	1.29704	0.463094
NCSTN	0.0101246	9.91115	0.149893	0.807597
KIDINS220	-0.0194411	10.2907	0.582914	0.515724
CHD4	0.174587	10.0422	28.3948	9.78634e-06
CCNY	0.036671	10.4343	2.90748	0.168176
TBR1	-0.0887918	9.86287	60.6972	0.00279018
SVBP	-0.118515	9.86164	119.952	4.30228e-05
SMIM20	-0.0580197	9.87196	13.5857	0.0919985
RPLP1	-0.0088318	10.2412	0.0834475	0.778454
GTF2IP12	-0.0432857	9.90168	3.22875	0.288647
DENND6B	-0.0559045	9.85966	35.2698	0.0381403
NCL	-0.0129856	10.0041	0.164535	0.747216
WASH2P	-0.134237	9.87664	55.0632	0.00021452
MTFR1L	-0.0763798	9.88091	16.1509	0.0411687
NT5DC1	-0.300858	10.1531	101.47	1.33963e-19
COL9A3	-0.323778	9.89617	195.564	4.55046e-16
PSMA4	-0.113475	9.90851	19.3546	0.00589304
NACA	0.0323833	10.0923	0.991722	0.37906
C4orf48	-0.398834	10.0393	150.584	1.30844e-26
TYROBP	0.00211856	9.85477	0.131104	0.918831
SEC31A	0.123558	10.0632	14.313	0.00128941
PLEKHB2	-0.131766	9.95085	19.1119	0.00153855
RPL29	-0.0306236	10.0334	0.847189	0.432457
GALNT18	0.183485	9.90588	48.7428	9.16179e-06
ANAPC11	-0.157129	9.91661	33.1404	0.000152148
PHACTR3	0.0196764	10.5215	1.01643	0.427718
ATP9A	-0.160315	10.2208	33.9277	3.46591e-07
RPS3	-0.00457396	10.0631	0.0185945	0.903892
WASH7P	-0.188349	9.92105	47.3257	5.74554e-06
GPN2	0.101249	9.87848	31.9786	0.00525753
GUK1	-0.271164	10.0137	70.5539	3.19479e-12
LDHA	-0.397859	9.89918	276.968	2.63973e-23
NEDD4L	0.150906	10.0432	19.7702	0.000125283
ACOT7	-0.109467	9.93126	14.3099	0.00891173
CLSTN1	-0.146757	10.0589	20.8188	8.99584e-05
ATP1A2	-0.173237	9.91141	41.4727	2.66747e-05
PRKACB	-0.0391426	10.4673	3.80419	0.127329
VPS26B	0.0127581	9.90634	0.253097	0.757151
RGS7	0.0999916	10.0617	9.29861	0.0091365
DDX20	0.0182693	9.85951	4.10898	0.484029
POMP	-0.195177	9.94236	43.1629	2.62273e-06
MRPL12	-0.0767389	9.85999	59.7947	0.00511824
STK25	-0.164835	9.90523	43.6661	5.58688e-05
PPAN	0.0173646	9.85387	11.9383	0.36295
SYT11	-0.271205	10.2307	99.397	1.1804e-18
MACROD2	-0.00692562	10.1883	0.0518649	0.834134
TIMM10B	-0.0628701	9.88832	8.91939	0.106992
CA11	-0.237779	9.88779	123.908	9.35008e-10
COX6C	-0.5043	10.0147	252.96	3.92466e-40
AL445433.1	0.00803941	9.84889	353.778	0.0553048
C1orf61	-0.159834	9.96229	25.7595	0.000105861
LGALS8	-0.0226681	9.87499	1.80243	0.52305
RAN	-0.222486	9.92801	60.5254	8.42016e-08
MFN2	-0.0615949	9.91296	5.52309	0.138164
PCDH9	-0.105997	11.3176	188.605	2.2863e-12
LINGO1	0.343184	10.1735	102.951	1.22806e-22
CREM	-0.0160988	9.92281	0.321029	0.701386
KCNJ6	-0.114454	9.89489	23.5852	0.00420257
EIF4G3	0.00966186	10.5343	0.307049	0.693846
ARF1	-0.206168	9.98859	41.9041	2.85373e-07
RPL24	0.0208038	10.0785	0.401288	0.577323
HPCA	-0.228465	9.87695	162.115	3.6e-10
CIRBP	-0.351051	10.0826	129.978	8.63799e-23
MYO10	0.123613	10.0045	13.7599	0.0024548
MDH1	-0.539592	9.96673	310.682	7.24332e-42
HMGB1	0.156752	10.4195	49.9962	9.93167e-09
C6orf106	-0.0295366	9.94365	0.964067	0.482292
FO538757.1	-0.0767772	9.86496	35.3993	0.0132298
GDI1	-0.0992911	10.0196	9.27767	0.0115584
SLAIN1	0.0382934	10.7481	7.51423	0.0714019
SLITRK5	0.0278436	9.89114	1.55971	0.480574
CDC16	-0.0585201	9.98522	3.40266	0.151879
CAMK2B	-0.16782	9.93569	31.1301	5.67385e-05
ASCC1	0.130785	10.0461	15.2593	0.000832011
NDRG2	0.0910528	10.2106	8.55501	0.00541407
EAPP	0.00175767	9.94363	0.00341086	0.966717
RPL36AL	0.0178867	9.95149	0.328578	0.670765
RAB15	-0.0676281	9.86343	33.7779	0.0239977
GPI	-0.0425116	10.0954	1.74483	0.242683
SMARCD3	-0.0415939	9.88476	4.12923	0.277311
PCNX1	0.0971375	10.2263	11.8417	0.00259989
CABP1	0.0513581	9.90592	3.90307	0.213317
FASN	-0.144278	9.89315	41.2292	0.000282117
SLC48A1	-0.627308	10.1602	465.922	3.40139e-86
APBA2	-0.109042	10.029	11.1598	0.00504366
RAB11A	-0.078125	9.91937	8.13372	0.061319
GOLGA8A	0.161467	9.95946	25.5503	0.000139797
SRSF8	-0.0431566	9.89656	3.38681	0.283549
MAP1A	0.0835431	10.1145	6.51292	0.0208227
PCBP2	0.0558155	10.0228	2.99188	0.160815
SERF2	-0.138897	10.0224	16.633	0.00037477
NBR1	0.0927719	9.98816	8.33455	0.0247018
SCG3	-0.348026	9.93411	145.579	2.76765e-17
SLC8A1-AS1	-0.0794152	9.86287	46.7485	0.00737786
RTL10	-0.0639477	9.87264	15.8937	0.0655541
ARPP19	-0.28274	10.0769	79.6247	5.77555e-15
RNF135	-0.0696547	9.8567	88.515	0.00391259
COX5A	-0.283381	9.9127	112.805	5.10927e-12
MBTPS1	0.106584	10.0022	10.7645	0.0090488
TSPAN3	-0.060378	9.9516	3.88945	0.148806
SH3GL3	-0.0987247	10.744	46.9487	2.39575e-06
OCIAD1	0.0550141	10.1018	3.03771	0.132056
MESP1	-0.155272	9.86017	243.654	2.94314e-08
SEC14L1	0.0131536	10.0209	0.160585	0.740467
SFT2D1	0.00420067	9.97778	0.0171187	0.919028
HCFC1R1	-0.119668	9.89504	25.9476	0.0027732
EIF1AX	0.0493436	10.016	2.26146	0.217969
HES6	-0.0396048	9.88308	3.86309	0.296069
TCF25	0.176714	10.1362	31.1185	7.43838e-07
YPEL3	-0.0021577	10.0326	0.00414214	0.956027
NDUFAF2	0.0443647	10.0735	1.72211	0.238475
ATP1B2	-0.244503	9.92431	73.5001	3.60706e-09
HNRNPL	-0.208659	10.0802	34.0175	9.47992e-09
COPRS	-0.240937	9.90137	97.2392	2.6521e-09
UROD	-0.110539	9.86967	54.3783	0.00100221
DHX36	0.0026689	10.0398	0.00662629	0.945262
KRT222	-0.0496521	9.85305	114.597	0.00866222
PSMD8	-0.244903	9.93004	73.9261	3.51359e-09
USP39	-0.076073	9.90186	9.79282	0.0620673
IFIT1	-0.0778499	9.87938	17.3715	0.0353697
ADAM11	-0.111173	9.86494	79.5926	0.000356276
RAB40B	0.0875307	10.2303	9.69111	0.00638088
CHCHD10	-0.259159	9.90196	107.538	1.5581e-10
TBCB	-0.0443926	10.0038	1.74762	0.269224
CTXN1	-0.255709	9.88794	141.107	4.70958e-11
MRPL34	0.00197954	9.8823	0.00992891	0.958074
AC074033.1	-0.00334649	9.84917	14.6477	0.653003
U2AF1L4	-0.0437685	9.86656	10.5682	0.168221
NUMBL	-0.0968969	9.87239	36.7534	0.00525058
ATP1A3	-0.369365	9.92101	181.179	2.30523e-19
SNRPD2	-0.183508	9.90759	49.6979	7.70223e-06
MCRS1	-0.00605117	9.87396	0.133182	0.862968
HS6ST3	0.29731	9.98299	78.2382	1.97864e-12
ATP6V1D	-0.240167	9.93324	69.6564	7.04747e-09
FAM213A	-0.0202667	9.94042	0.450422	0.630181
TFPT	-0.0185071	9.8801	0.954881	0.617944
GHITM	-0.230451	9.92058	70.3175	2.62044e-08
SMARCB1	0.00628167	9.9241	0.0506214	0.881284
DTNB	-0.143866	10.2554	27.8438	2.33326e-06
FUNDC2	-0.0531318	9.89102	5.76248	0.178191
LINC01278	-0.181052	10.0154	29.4764	3.80823e-06
ATP6AP2	-0.253452	9.95581	69.7778	6.88039e-10
GPM6B	-0.0139262	10.9233	1.36557	0.46242
TMEM141	-0.309471	9.871	402.471	2.67176e-19
OLFM1	-0.49197	9.97792	250.686	1.67904e-35
RPL7A	-0.146846	10.0832	20.5595	5.65768e-05
TUSC1	-0.0166167	9.86634	1.58814	0.597681
ZNF7	-0.00379509	9.8903	0.0296558	0.923146
BAALC	-0.127476	9.90144	26.578	0.00172031
C8orf37	0.00830293	9.85326	3.33465	0.649017
C8orf59	0.151131	9.89196	45.9943	0.00013074
RPL7	-0.0340158	10.015	0.994203	0.392305
PSD3	-0.141854	10.4419	42.5431	4.1741e-08
MICU3	-0.189099	10.0668	35.1607	3.16188e-07
NDUFB2	-0.333842	9.97769	112.652	8.65788e-17
AKR1B1	0.0245766	9.88499	1.4296	0.520726
ZC3HC1	-0.0150978	9.87786	0.706734	0.678628
PSIP1	0.155028	10.173	25.9896	6.0803e-06
VGF	-0.211997	9.87708	139.856	6.12535e-09
PPP1R9A	-0.0274939	10.2735	1.01883	0.365154
LIMK1	-0.107237	9.86694	63.2858	0.000883872
2022-09-07	-0.149814	10.8614	223.858	8.87289e-15
RPL21P75	-0.0104548	9.85605	1.94957	0.645066
PHF14	0.0233123	10.2573	0.735166	0.452408
SASH1	0.200132	10.4205	76.76	3.26362e-13
CDC40	-0.08748	10.0282	7.43079	0.0248932
MAP3K7	0.0512327	10.0526	2.4285	0.183638
FIS1	-0.344909	10.0206	116.845	2.36379e-19
TBCC	-0.0730325	9.86498	33.5611	0.0184294
RUFY1	0.126631	9.96595	15.9753	0.00264717
PJA2	-0.10417	10.1688	12.3141	0.00180885
COX7C	-0.406616	10.0189	156.155	1.82954e-26
SKAP2	-0.0762027	9.89587	10.3084	0.0576122
RPL37	-0.00261239	10.0697	0.00632931	0.944622
SPARCL1	-0.167133	10.2959	38.4235	1.10174e-08
HOPX	-0.35857	9.90927	193.31	1.33656e-18
PAICS	-0.0243309	9.94661	0.652084	0.562555
SST	-0.396818	9.8945	298.976	1.09831e-23
ZBTB38	0.0837037	10.1095	6.92277	0.0212686
C3orf18	-0.0590983	9.85697	60.2179	0.0151838
HMGB1P5	-0.141257	9.88402	47.2247	0.000215448
RBMX	-0.0409516	10.1181	1.69501	0.248729
INPP5J	-0.0160949	9.85083	39.1027	0.240334
UFD1	0.114727	9.91825	17.382	0.00643521
SH3BGR	-0.0561422	9.89617	5.73957	0.162409
CSE1L	0.0568543	9.99822	3.09531	0.163384
YWHAB	-0.287795	10.1234	86.7742	5.44529e-17
COMMD7	-0.103677	9.87352	39.1912	0.00319262
ABHD12	0.0406693	10.0383	1.52873	0.29817
PAK5	-0.0130691	9.96588	0.164121	0.753579
ILKAP	0.211408	10.0505	41.3694	7.44248e-08
C2orf80	-0.170276	9.86174	247.703	5.94543e-09
FAM171B	-0.00461329	10.1276	0.0199629	0.89589
DHFR2	-0.0898257	9.86619	46.1317	0.00469013
HSP90AA2P	0.0876499	9.86144	74.2451	0.00115705
PPP2R5E	0.0226015	10.102	0.482413	0.534558
CCM2	-0.135451	10.0044	17.4868	0.000666888
RAB27B	0.00505517	9.87544	0.0860153	0.887009
TRAPPC6B	0.0136018	9.93865	0.214751	0.747229
ERH	-0.160018	9.92882	31.5178	0.000124503
AC016739.1	-0.0075595	9.85541	1.26644	0.729095
RSRC2	0.168874	10.0337	26.3652	2.21764e-05
ST6GALNAC5	0.294059	9.90871	122.198	1.67064e-12
UNC80	0.212175	9.91043	63.3471	3.78111e-07
KCNG1	-0.0366944	9.85442	41.5616	0.0787464
KCTD10	-0.0439285	9.87508	6.7127	0.217027
COX6B1	-0.333337	9.9715	110.758	1.41219e-16
STMN3	-0.319287	9.90487	163.416	3.61732e-15
DAAM1	-0.015745	10.0026	0.225743	0.696257
LINC01821	-0.0239785	9.8508	87.4753	0.0821155
TUBA1A	-0.513206	10.2683	360.172	1.32186e-70
RPL13AP20	0.0241591	9.84969	406.131	0.000862993
ZFYVE21	-0.0589758	9.89446	6.50902	0.140039
CPNE9	0.0637445	9.86148	39.3688	0.0197005
MFSD6	-0.172798	10.0927	30.7609	1.5704e-06
PRKCA	0.101344	10.2813	13.8947	0.000934797
CCNQ	-0.0531504	9.89578	5.17216	0.185465
SMAP1	-0.0982542	10.0104	9.00363	0.0133325
GABARAPL1	-0.165007	9.93744	32.2651	7.539e-05
SPRYD7	-0.0224585	9.92472	0.642963	0.592927
CIR1	-0.0421779	10.0064	1.69625	0.292673
PGM2L1	-0.269427	9.92851	89.5037	7.58269e-11
MRPS21	-0.277205	9.91738	105.616	1.75354e-11
CPNE4	0.0406549	9.89648	2.97925	0.312694
PRR13	-0.126363	9.87552	53.4662	0.000431903
OXCT1	-0.311732	9.95371	105.983	2.6707e-14
CHP1	-0.273113	9.93753	86.0192	4.00411e-11
NAP1L1	-0.00395401	10.1527	0.0166615	0.908339
FKBP2	-0.134132	9.97122	17.6562	0.00108409
CDC123	-0.00105479	9.91923	0.00146674	0.979934
SELENOH	-0.0422416	9.86582	10.254	0.177566
TMCO1	-0.138776	9.94079	21.9004	0.000883398
TMED2	-0.10214	9.92455	13.3635	0.0145652
PAK1	-0.316942	10.0198	94.9176	1.78459e-16
SLC7A10	-0.0141479	9.84974	88.9837	0.169627
WAC-AS1	-0.118487	9.90412	22.6904	0.00376812
MRPS36	-0.082418	9.90274	11.0338	0.0435901
SLC1A2	-0.199006	10.0573	37.3046	9.82944e-08
POGZ	0.0217905	10.3571	0.855577	0.441731
RPL15	-0.114078	10.1277	12.3004	0.00106186
CAPN1	-0.0500781	9.86408	17.5871	0.0982339
RGS4	-0.516868	9.90009	473.626	1.57521e-38
NUDCD3	-0.0974481	10.1011	9.61367	0.00670068
JAZF1	-0.188368	10.1455	36.4692	2.75234e-08
PHPT1	-0.238449	9.91268	81.6723	6.8928e-09
THAP6	-0.157704	9.9628	26.7071	0.000130367
LAMTOR5	-0.219385	9.90584	73.6621	7.82799e-08
CNPY3	-0.042969	9.87153	7.61822	0.209006
PVALB	-0.0100252	9.85273	5.3082	0.570741
FAS	0.00786693	9.85067	12.0541	0.52973
INPPL1	-0.00671728	9.8679	0.239871	0.835269
AK5	-0.0580062	10.5189	8.32185	0.0184566
CCND2	-0.42972	9.88539	451.331	2.53022e-29
ATP1A1	-0.170599	10.0459	27.6004	6.86546e-06
HAX1	-0.118598	9.89501	25.9819	0.00302463
CAMSAP2	0.219833	10.2036	55.3682	5.22007e-11
DNAJC5	0.134785	9.97272	17.5374	0.00132011
PTGES2	-0.120778	9.87346	53.6826	0.000595943
NDUFAF5	-0.0321489	9.90167	1.72806	0.430769
NAXE	-0.125768	9.87231	59.8743	0.000295472
SNRPD1	-0.118393	9.90156	23.5727	0.00361851
SH3D19	0.131069	10.4193	30.8492	1.52571e-06
KDM1A	-0.000561121	9.87747	0.0010015	0.987658
MED9	0.00385042	9.86924	0.0710294	0.906947
BAP1	0.0139142	9.90184	0.318832	0.733488
KIF5B	0.24812	10.0436	55.6226	4.25473e-10
CAMTA1	-0.0286589	10.394	1.64867	0.293432
FBXO33	0.174766	9.92593	36.271	3.88833e-05
ARHGEF2	-0.155348	10.0667	24.4094	2.84523e-05
SERBP1	0.173787	10.0094	28.206	2.06862e-05
LAPTM4A	-0.0544106	9.89709	5.21904	0.176963
B4GAT1	-0.273598	9.91959	98.7307	3.40391e-11
PREX1	-0.00397968	10.3972	0.0299539	0.884091
MBOAT2	0.168043	10.2717	35.3892	6.91406e-08
EIF2B3	0.128383	9.97949	15.383	0.00209701
MARK1	0.0429465	9.9542	1.83386	0.307787
TMEM242	0.018895	9.90113	0.597614	0.643283
GDF10	-0.0143314	9.85033	48.543	0.241891
GRIN2B	-0.102431	9.98306	9.84092	0.0119556
MAPK1	0.00288011	10.1351	0.00859925	0.934549
SRCIN1	-0.378527	10.272	208.953	2.00918e-38
CUEDC2	-0.113759	9.90022	21.8371	0.00504954
CTSD	-0.183572	9.97315	33.5832	6.8429e-06
MEAF6	-0.129266	9.94068	19.4361	0.00196726
CDC42BPA	0.114757	10.6814	68.0467	3.06902e-07
RPL13	0.136602	10.2897	22.5757	7.61549e-06
UBE2D4	-0.0535006	9.8836	7.1009	0.159566
EIF5A	-0.113026	9.94374	13.8859	0.00682398
HNRNPU	0.25644	10.2839	89.9212	1.84949e-16
KLC1	-0.248304	10.0466	62.2342	4.02613e-11
PLIN3	-0.0455458	9.88986	4.35785	0.246159
COQ10B	-0.0446891	9.89406	3.85636	0.262922
NUDT14	-0.180683	9.86259	251.429	1.51293e-09
ST8SIA1	0.244706	9.90686	85.8901	3.62675e-09
COPS2	0.203424	10.0128	38.3229	6.19257e-07
RPL30	0.0314261	9.91043	1.35736	0.449599
TLK1	0.0329582	10.0142	0.968504	0.4107
GNA15	-0.0331008	9.85067	177.908	0.0153589
FIBP	-0.174683	9.89417	58.876	1.16088e-05
RNASEH1	0.00283554	9.87606	0.0270038	0.93686
NOP53	0.0136797	9.89993	0.312449	0.736585
B2M	0.0491029	10.0687	2.02596	0.194527
HERC1	0.159773	10.2744	36.6637	2.65665e-07
MAP2	0.0865649	10.1792	8.09636	0.01038
DERL2	-0.116826	9.90046	23.6584	0.0040002
KCTD13	-0.067713	9.89544	8.65328	0.0911961
UBL7	-0.0190157	9.86904	1.72444	0.563923
IRF2BP1	-0.010183	9.86352	0.773662	0.731184
C9orf16	-0.343136	9.90821	179.01	3.55115e-17
NARFL	0.0598513	9.87176	15.1382	0.0770344
KEAP1	0.146727	9.91259	30.8036	0.000455858
MYL12B	-0.237906	9.91853	77.0308	8.71474e-09
UBALD1	0.0198246	9.88051	1.07383	0.593527
TBRG1	0.0529916	9.91879	3.81054	0.207187
UQCRC2	-0.0423146	9.97422	1.81646	0.305334
PHKB	-0.0102513	10.1235	0.104784	0.772243
SPIRE2	0.041058	9.87631	5.5255	0.250905
C17orf100	-0.0416029	9.85255	96.8698	0.0201787
HLF	-0.204008	9.89739	74.6902	3.80451e-07
TEX2	-0.152783	9.95678	24.8391	0.000223826
SCRG1	0.0915425	9.96729	8.05395	0.0291644
NRBP1	0.0622314	9.93328	4.62249	0.141526
OAZ2	-0.0808902	9.97518	6.55803	0.0490994
SNAI2	0.000559437	9.84913	0.534255	0.936061
CYCS	-0.276088	9.92628	97.4076	2.48137e-11
TNRC6C	0.203881	10.3938	82.4021	4.02142e-13
RPL6P27	-0.108948	9.86482	67.6981	0.000450507
PCYT2	-0.180917	9.87716	101.5	7.02979e-07
TFG	0.0301616	9.94434	1.00553	0.474918
ZNF446	0.0408109	9.85774	28.0927	0.08831
STX1B	-0.406538	9.89908	297.998	2.72426e-24
RPS15	-0.0336078	10.1853	1.08427	0.309815
NDUFA3	-0.362947	9.95047	140.61	6.47663e-19
ELP6	-0.00319479	9.8868	0.0237166	0.934195
GRHPR	-0.13559	9.94886	19.7721	0.00112526
PHYHIP	-0.185171	9.92955	41.492	8.69354e-06
DHPS	-0.0514826	9.89199	5.27429	0.193757
MED29	-0.148841	9.8934	43.6777	0.000181641
RPS19	0.0726675	10.1216	4.74013	0.0425281
DBP	-0.0146809	9.86133	2.02144	0.600458
RPS9	0.0421348	10.0906	1.61793	0.253835
PIH1D1	0.0107006	9.89516	0.215211	0.789499
TMEM18	-0.272005	9.86972	339.073	1.05279e-15
AKAP12	-0.024577	9.91474	0.81315	0.555555
SYNJ2BP	-0.0930446	9.8792	24.7765	0.0118381
CFDP1	0.0177076	10.0833	0.287266	0.633369
LARP1	0.130297	10.1227	16.8533	0.000298299
PPP1R21	0.148243	10.2712	29.635	1.86265e-06
CFAP36	-0.0810725	9.94815	7.18576	0.0525207
CHCHD6	-0.145599	9.93621	24.2279	0.000487428
MRPL4	0.0294025	9.86416	6.05435	0.32335
PDHA1	-0.118107	9.89108	28.8536	0.00275698
PRPF4	-0.00641063	9.87275	0.163351	0.852925
TMEM246	-0.226183	9.91459	73.6632	4.20145e-08
CBWD5	0.107138	10.0022	10.342	0.00869902
TTC39B	-0.0601293	9.87583	11.7131	0.0937784
TUBB4B	-0.217613	9.88198	123.031	8.02669e-09
SMIM19	-0.173175	9.87948	86.0257	3.06757e-06
IGBP1	0.0326555	9.90888	1.57061	0.43097
FBXO25	-0.0969537	9.96417	9.81539	0.0191671
ACHE	0.00881893	9.85526	2.02938	0.679847
COL26A1	-0.0119551	9.87104	0.610898	0.724099
GTPBP10	-0.0196503	9.95309	0.421235	0.639284
CROT	-0.0268549	9.88747	1.61029	0.489234
CACNA2D1	-0.061298	10.4811	9.22705	0.0155123
DNAJC30	-0.145982	9.86588	126.275	4.43029e-06
HDDC2	-0.221617	9.88649	112.693	9.70802e-09
FUT9	0.187274	10.2004	36.9186	2.18373e-08
COX7A2	-0.41785	9.96856	178.767	2.28325e-25
ENPP4	-0.124464	9.96106	16.8669	0.00263417
KLHDC3	-0.0842455	9.89869	12.2931	0.0372857
OARD1	-0.0617638	9.89435	7.38515	0.122097
PHF20L1	0.104399	10.0834	10.5117	0.00534389
TTC1	0.218845	10.178	49.9189	1.9036e-10
AC008608.2	-0.00165674	9.8522	0.196174	0.91986
SKP1	-0.171648	10.0832	28.7495	2.36903e-06
MCTP1	0.296864	9.92891	100.043	4.02513e-12
IFT22	-0.128114	9.85879	202.128	1.57042e-06
NDUFA5	-0.346287	9.94311	140.588	3.32985e-17
MSL3	-0.0417022	9.87483	6.16815	0.239952
NDUFS6	-0.254712	9.92668	82.3923	7.82397e-10
FRG1	-0.162304	9.92818	32.7197	9.9056e-05
HSPA4L	0.713873	9.97453	425.497	1.97442e-59
SOBP	0.0418597	10.1871	1.85952	0.20911
AC004057.1	-0.0539671	9.85362	97.6861	0.00668123
PPA2	-0.00442095	10.1607	0.0204438	0.896726
PLPP6	-0.0503419	9.85337	106.738	0.00966155
PPP3CA	0.118346	10.2893	19.2538	0.000102305
TSC22D3	0.258364	10.0247	59.2747	1.88153e-10
UBE2K	0.106926	10.2524	15.096	0.000685287
LDB2	0.179994	9.95322	31.0023	2.35373e-05
AC093323.1	-0.107824	9.86775	61.3426	0.000965519
VLDLR	-0.302531	9.88652	216.53	4.439e-15
TAGLN3	-0.380289	9.9353	170.521	1.97508e-20
CBWD3	0.0288543	10.0065	0.742692	0.474611
FAM107A	0.140518	9.91558	24.7464	0.00082593
CAMKV	-0.293273	9.88319	219.736	1.10623e-14
INIP	-0.0431067	9.97454	1.8698	0.296216
GPX1	-0.0987378	9.87898	27.2676	0.00747635
RUFY3	0.181828	10.3772	62.8598	1.57202e-10
FBXL2	-0.150322	9.89384	42.4185	0.000159942
USF3	0.0270758	9.94259	0.811348	0.52134
RANBP1	-0.0980287	9.89008	19.6372	0.0126275
SUMO3	-0.214564	9.8885	100.871	3.72618e-08
C21orf33	-0.18441	9.90398	55.3412	6.13084e-06
CHMP4B	-0.101284	9.92458	13.1094	0.0154197
CRNKL1	0.0465955	9.90524	3.49317	0.258139
SNAP25	-0.394697	10.1409	157.294	2.32665e-32
MRPS26	-0.0615044	9.90629	5.83992	0.135002
TRIP12	0.0871939	10.2818	10.8559	0.00432179
RPL10P6	0.000966041	9.84898	2.60393	0.873469
SRPK2	0.0485832	10.5834	9.08025	0.0411418
C4orf3	-0.102223	9.89803	18.3282	0.0113209
ACOT13	0.102121	9.90584	16.07	0.0134294
EBPL	-0.155469	9.86811	120.755	2.44659e-06
APLP1	-0.116821	10.3531	17.4343	2.99205e-05
BRD3	0.0411302	9.90453	2.66821	0.317421
KATNAL1	-0.140941	9.99022	19.0247	0.000476956
RPS2P5	0.00336529	9.85125	1.31661	0.812725
CRYM	-0.524826	9.87828	847.904	1.09596e-46
AKT1S1	0.113506	9.87852	39.4528	0.0017381
ROGDI	-0.526923	9.9238	373.152	1.9257e-38
NAB2	0.0215787	9.85699	8.70857	0.355858
JPT1	-0.229611	9.87987	148.783	6.90409e-10
SPRYD3	-0.176173	9.8934	61.0536	9.2745e-06
OBSL1	-0.0328217	9.86802	5.50344	0.312579
PSMC4	-0.119557	9.89169	28.6237	0.00249988
PTMS	-0.240053	9.93416	67.6911	7.14501e-09
KCTD6	0.129665	9.91072	24.6075	0.00188067
HPCAL4	-0.231342	9.89341	104.312	5.52559e-09
LONRF2	-0.0972807	9.93469	10.9442	0.0202241
PAK3	0.0016768	9.92969	0.00326586	0.968293
NTM	-0.316043	10.5732	283.865	2.97269e-43
GGNBP2	0.0837353	9.98305	6.69734	0.0433639
ARRDC2	0.117447	9.91611	18.6434	0.00518172
LPCAT4	0.0506864	9.87585	8.61733	0.15402
PAFAH1B2	-0.146633	10.0499	21.0034	0.000107249
PEX11B	-0.0539116	9.87567	9.88977	0.132225
AAMDC	-0.0455207	9.89979	3.59513	0.26226
PARK7	-0.118743	9.97857	13.8115	0.0036555
IDH3B	-0.118891	9.88389	34.2687	0.00182643
TMEM9	-0.169281	9.88463	68.8831	9.88316e-06
PTPN11	0.183258	10.1674	35.7903	1.16588e-07
PTPN20	-0.00421268	9.85504	0.481229	0.84303
S100A13	0.101371	9.88111	27.3646	0.00629045
NAPRT	-0.00401586	9.85252	0.95123	0.815016
DICER1	0.0199326	10.3785	0.746705	0.473436
PCDH17	0.07958	10.0686	5.81022	0.0361597
MAGI2-AS3	-0.044023	10.0983	1.95645	0.224806
DANCR	0.203192	9.91212	54.9605	1.22829e-06
RPL26	-0.259903	9.92376	76.6331	3.38246e-10
RAB18	0.0105677	9.97906	0.109608	0.798119
RPS26	-0.452941	9.96922	208.121	1.02612e-29
M6PR	0.0499401	9.88152	6.93392	0.181276
RAB3A	-0.40862	9.88392	398.631	5.45537e-27
ODF2L	0.00333033	9.96843	0.0108189	0.936232
FNDC10	-0.0371172	9.85356	55.4122	0.0579495
MALSU1	0.0378361	9.91219	2.06009	0.363982
RPL3P4	-0.108317	9.87154	40.907	0.001641
TM7SF2	-0.313356	9.89128	200.781	1.53273e-15
SH2D3C	-0.0063179	9.8537	1.60483	0.74337
B3GNT4	-0.0120069	9.84994	50.3847	0.273081
2022-03-02	0.0142539	9.85471	6.24012	0.486228
SLC22A17	-0.157943	10.0494	23.5711	2.97959e-05
FJX1	-0.0674455	9.85275	230.18	0.000293016
CCP110	0.473015	10.3664	345.112	1.02003e-56
TMEM74B	0.00617154	9.85442	1.24085	0.759938
CBWD1	0.133965	9.97595	16.9934	0.00137552
CADM3	-0.185507	9.87749	104.467	3.92866e-07
TUBB	-0.411085	9.92526	221.761	1.10719e-23
POLR2L	-0.229758	9.89307	97.3185	6.77056e-09
NDUFB9	-0.153373	9.90504	35.5142	0.000177668
TMEM258	-0.349953	9.9577	126.58	8.29092e-18
OTUD6B-AS1	0.0270282	9.95093	0.782494	0.521035
TMEM54	-0.0747914	9.86085	52.4581	0.00779566
SPIN1	-0.119024	10.2373	18.7245	0.000129424
ANO6	-0.0662155	9.89008	8.6302	0.0920902
LYRM1	-0.0706974	9.88551	11.9289	0.0660603
SCCPDH	0.040859	9.93456	1.90467	0.333836
VPS35	-0.20994	9.95538	47.5182	3.57251e-07
TTC19	0.129237	10.0491	15.4215	0.000921716
ECE1	0.307179	9.97916	86.2963	4.37486e-13
CCDC85B	-0.315626	9.95725	106.357	1.08941e-14
PDCD5	-0.11966	9.91963	19.019	0.00407686
C1QTNF4	-0.327114	9.88264	272.985	5.16669e-18
SNCG	-0.440261	9.89314	379.735	4.22509e-29
MAST3	-0.31649	10.0206	101.195	1.84863e-16
MED4	0.0657991	9.94521	4.71209	0.11994
ACSL1	-0.0413203	10.0161	1.64079	0.297833
HIVEP1	0.0253422	9.9475	0.653992	0.547809
CEP170B	-0.121954	9.86631	86.0875	0.000135712
SUMO1	-0.0294836	9.94743	0.932232	0.48259
SCN1B	-0.0945738	9.89724	16.1655	0.0188855
CCDC88B	0.0800854	9.85689	133.82	0.000293743
ACTR6	-0.171205	9.88487	71.2204	8.0348e-06
LY6H	-0.425519	9.93169	223.053	2.64827e-25
ATN1	0.0999538	9.93761	11.2943	0.0185365
SLC6A17	-0.147703	9.87217	85.7639	2.11977e-05
MALAT1	-0.0464724	11.7206	23.9454	0.000216032
HP1BP3	0.362011	10.4545	281.306	4.55029e-40
B3GAT3	-0.0371978	9.92313	1.74211	0.375143
COPE	-0.202051	9.92687	49.2914	1.17352e-06
DAD1	-0.114105	9.95057	13.4706	0.00617031
EIF5	0.463575	10.1105	192.851	2.6431e-34
NARS	0.0572175	9.97049	3.29424	0.170588
RPS28	-0.1148	10.1499	12.1591	0.000740343
BABAM2	-0.101856	10.0625	9.4631	0.00660284
FEZ1	-0.261043	10.308	102.531	7.28284e-20
UBA52	-0.0585812	10.0189	3.11261	0.138097
GNAO1	0.00842579	10.555	0.195654	0.727373
OSBPL8	0.223414	10.1283	48.0576	6.76739e-10
COPS3	-0.0961692	9.91048	13.9694	0.020038
RPL23A	-0.0622251	9.92719	4.10171	0.137988
MAP2K6	-0.183791	9.92903	41.4724	1.01482e-05
KPTN	0.0372812	9.86563	8.87771	0.224436
SRM	-0.129104	9.88134	44.0754	0.000587499
DYNLL2	-0.115808	9.94902	15.0718	0.00547021
SV2B	-0.237185	9.96923	55.2565	5.85779e-09
CLASP1	0.0956102	10.4501	23.5564	0.000303988
CAMK2A	-0.277905	9.97804	73.7634	5.35508e-12
MRPL13	0.00511962	9.89257	0.052085	0.897407
ANKRD12	0.37181	10.2503	156.399	4.36503e-30
MLLT1	-0.0232719	9.9166	0.748718	0.577481
ARL8B	-0.0967708	10.0277	9.08201	0.0130622
MAGED4B	-0.103376	9.8587	129.721	9.25788e-05
MAPRE3	-0.20341	9.91307	59.4146	8.18774e-07
MAGED4	-0.015909	9.87304	0.947423	0.646894
LINC00599	0.0198333	9.87195	1.54411	0.561178
CBWD2	0.164977	10.0126	24.3034	4.95235e-05
SBDS	-0.023379	9.9671	0.552707	0.57384
WBP4	0.00617831	9.96746	0.0381855	0.882101
ILF3	-0.0160474	9.97036	0.263104	0.698945
BABAM1	-0.117128	9.87533	46.036	0.00107717
AC021016.2	0.0152096	9.85027	69.7569	0.163031
PTCHD4	-0.0037678	9.85731	0.23867	0.875751
JUND	-0.102579	10.1092	10.9245	0.00396178
GCC2	0.0261101	10.0713	0.632842	0.488001
UQCRFS1	-0.117483	9.89928	23.3491	0.00370162
FAM105A	-0.0361954	9.85292	66.1222	0.050324
PPP5C	0.160989	9.91238	36.9454	0.000120134
FGD4	-0.289093	10.0023	76.9276	1.94255e-13
ZNF76	-0.0124134	9.89582	0.289756	0.757275
FAM216A	0.208109	9.90435	69.0448	4.43207e-07
BCL11A	-0.224944	9.89055	101.323	1.03809e-08
TEX261	-0.00517202	9.87054	0.120381	0.877708
NUAK1	-0.200384	9.98492	40.2568	6.72724e-07
ANKRD39	-0.0684124	9.87853	14.0126	0.0626195
MRPS9	-0.0184652	9.97196	0.336441	0.655891
CCDC74A	-0.0222155	9.85036	107.259	0.0768213
RNF181	-0.267654	9.87068	296.09	6.10525e-15
CCDC74B	-0.00308367	9.84921	12.3339	0.686525
ZNF275	-0.0130924	9.86345	1.3164	0.658418
ENOX2	0.0235532	10.1903	0.556383	0.477294
NKAP	-0.0395012	9.90608	2.41858	0.337291
FRMPD4	0.464531	9.94755	214.673	1.02886e-26
NPDC1	-0.168648	9.91665	37.8633	4.74898e-05
NCS1	-0.239568	9.90946	85.4781	5.16901e-09
ST6GALNAC6	-0.00582119	9.85082	4.85005	0.663936
CDK9	-0.0562851	9.87751	9.95504	0.12219
SH3GL2	-0.0618748	9.91885	4.93675	0.138535
ARFGEF1	0.108604	10.1507	12.1625	0.00184734
UBE2V2	-0.0460788	9.99022	2.06722	0.257574
STMN4	-0.457078	10.0569	203.96	3.72816e-36
POLR2J3	0.128062	10.0209	14.6921	0.00143375
TMEM130	-0.271219	9.90623	114.756	2.8732e-11
EIF4H	-0.0846149	9.99343	7.15923	0.0363757
LINC00957	-0.0806445	9.8601	68.1541	0.00339893
EEPD1	-0.300641	10.0445	85.2527	1.07638e-15
TMEM106B	-0.127615	10.0033	16.0382	0.00137324
FSCN1	-0.1873	9.9887	34.1163	3.2312e-06
SH3BGRL2	-0.233523	9.91116	79.6607	1.33729e-08
AARS2	0.000265109	9.85404	0.00251232	0.989274
MEA1	-0.0931909	9.86256	66.7003	0.0015849
DNPH1	-0.257842	9.86572	394.433	7.44044e-16
GLO1	-0.0224461	9.92402	0.641948	0.593003
HLA-A	0.0305578	9.8963	1.66755	0.447637
TIGD6	-0.0270187	9.85935	8.58953	0.306765
ETF1	0.119979	9.9206	19.0046	0.0044746
TXNDC15	-0.227343	9.93494	63.4527	4.33747e-08
PAM	0.0532117	9.8975	4.84535	0.18783
CCNH	0.0945551	9.9563	9.35825	0.0251787
SCOC	-0.216159	9.95201	51.6755	1.66069e-07
SEC24D	0.183963	9.87443	128.352	7.87899e-08
PCDH10	0.0857012	10.0605	6.6989	0.025418
GRINA	-0.30574	9.89679	169.828	1.97305e-14
FGF12	0.103517	10.0641	9.3059	0.00683128
GRSF1	-0.0562645	9.9315	3.86043	0.18038
SEC61A1	0.0600224	9.90311	5.81385	0.143462
MTRNR2L12	0.201224	9.90736	56.9479	1.24695e-06
PRPS1	-0.0312733	9.87218	3.91245	0.363741
RNF7	-0.0908344	9.90362	13.385	0.0263691
RHOA	0.0433332	10.0092	1.75164	0.282303
NDUFA6	-0.0638967	9.89538	7.54528	0.110918
BPHL	-0.10651	9.86124	104.413	0.000196677
NCAM2	0.104752	11.0492	88.7947	4.83658e-09
TPD52L2	-0.0800191	9.9161	8.90291	0.0546418
PTPRT	0.157434	9.92723	28.6493	0.000210208
HSPA5	-0.116476	9.9694	13.1647	0.00466545
MMP24OS	-0.184795	9.87954	95.88	6.4738e-07
PRNP	0.0733692	10.1692	5.48294	0.0312861
METTL5	-0.0319561	9.89186	2.07705	0.419663
VDAC3	-0.172658	9.92315	38.8136	3.32667e-05
CHAMP1	0.0082272	9.89019	0.143932	0.834254
RGCC	0.0332947	10.2252	1.19892	0.298771
MVK	-0.167433	9.89465	53.2965	2.71912e-05
CKAP4	-0.0481059	9.86715	12.5955	0.134088
NDUFA12	-0.2762	9.92797	93.4459	2.46179e-11
CNTN5	0.331564	9.96794	101.085	9.26136e-15
KDM1B	0.0544856	9.976	2.8935	0.190016
KPNA4	0.00322096	10.002	0.00999584	0.936522
EIF2S1	-0.0802809	9.93429	7.68143	0.0556067
CNTN1	0.255658	10.1336	61.8216	1.50069e-12
PCF11	0.230697	10.0541	49.1543	4.0649e-09
METAP2	-0.0634015	10.0072	3.78385	0.11267
MCRIP1	-0.101529	9.91767	13.847	0.0147739
MLF2	-0.095134	9.94524	9.70385	0.0228993
AP2B1	-0.08737	10.1102	7.8876	0.0141782
SPCS2	-0.143379	10.0273	19.8228	0.000221322
PAN2	0.0763883	9.91519	8.11369	0.0682867
STX5	0.00325635	9.92196	0.0135865	0.938214
IMPDH2	-0.025806	9.87579	2.23579	0.4708
PARL	-0.0768389	9.85988	64.5269	0.00491402
UBA1	0.0891588	10.0249	7.38135	0.0252595
MTCO1P12	-0.499132	9.8776	821.342	1.08421e-42
NECAB1	-0.0148449	10.2551	0.269088	0.631511
SCG2	-0.266645	9.91219	101.703	8.47641e-11
TMEM59	-0.119681	10.0894	13.9871	0.000985804
ATP6V1E1	-0.408872	9.99605	174.136	1.52213e-25
PSPC1	0.0966035	10.216	11.2387	0.00302839
GNRHR2	-0.0214978	9.85282	23.5481	0.234153
TM9SF2	0.0186724	9.9879	0.34249	0.649066
CETN2	-0.140852	9.86805	98.1984	1.88741e-05
RNF187	-0.135193	9.91676	24.7081	0.00113615
LYST	0.10168	10.0575	9.19028	0.0083288
ARPC3	-0.153542	9.9356	27.0803	0.000233548
TMBIM6	0.00283389	10.1097	0.00777308	0.937246
GANAB	-0.109904	9.91687	16.7633	0.00824621
ENC1	-0.444792	9.97082	201.211	9.39503e-29
GRAMD1B	-0.0146774	9.88519	0.504853	0.701974
TTC9B	-0.362496	9.88583	303.738	3.65853e-21
CASC4	0.220034	10.2339	55.0576	1.29889e-11
LRRC8B	-0.198836	10.0883	40.3128	3.51536e-08
PRPF19	-0.0282673	9.9004	1.35502	0.487173
MAPT	0.391174	10.4817	315.795	4.71813e-48
LMO7	-0.0638687	9.89616	7.36667	0.111931
RRP15	-0.0222667	9.9043	0.770917	0.587512
CDK5	-0.171508	9.86726	153.987	1.44732e-07
NTPCR	-0.168346	9.89663	52.2895	2.73471e-05
ADAR	-0.0116891	10.0266	0.131635	0.76651
UNC119B	-0.0659892	9.85995	47.2785	0.0156454
CDK14	0.0285923	9.97746	0.762119	0.490167
GABRD	-0.191312	9.86652	203.561	3.08282e-09
ARHGDIG	-0.365453	9.89548	248.651	3.52473e-20
LRP8	-0.0221771	9.85805	7.18793	0.377131
CBX7	-0.0105964	9.96327	0.117551	0.799481
BTBD2	0.0635313	9.91496	5.57563	0.129153
RABIF	0.00161463	9.86889	0.0127245	0.960714
CTNNB1	0.00698646	10.0245	0.0426211	0.8597
WAC	0.252901	10.3118	95.3211	8.08018e-17
DSTN	-0.412746	10.016	171.449	4.41504e-27
MIEN1	0.076986	9.89379	10.8164	0.0535523
TMEM132A	-0.158531	9.87131	104.116	4.10655e-06
CHI3L1	0.124661	9.85898	232.581	1.45715e-07
MAP2K4	0.357772	10.2042	133.408	8.07192e-26
FKBP8	-0.0454433	9.97813	1.94855	0.269314
RFPL1S	-0.062094	9.87377	14.1384	0.0773556
NOLC1	0.0918526	9.89117	17.6532	0.0198498
PIK3R3	0.0180202	9.85349	14.8126	0.328278
MRPL16	-0.0807334	9.87297	24.7748	0.0207121
PTOV1	0.00472103	9.90909	0.031689	0.909292
RAP1GAP2	-0.063046	9.89812	6.87701	0.118719
RPL21P28	0.00118175	9.85352	0.0506475	0.950015
HNRNPA1	-0.0754338	9.96744	5.77005	0.0682687
AMPH	0.020311	9.90433	0.636412	0.621199
TNIP1	0.0187425	9.89292	0.694449	0.637369
MXI1	0.0694817	10.272	6.43758	0.0239243
MTND2P28	-0.117084	9.8744	47.3322	0.000974576
KCTD21	0.0385738	9.85998	17.4131	0.142464
WASHC2A	-0.0131338	9.94697	0.190382	0.754768
REPS2	-0.324681	10.221	132.649	7.33833e-26
FBXO34	0.261081	9.98122	60.6624	5.99925e-10
GSTO1	-0.244474	9.94764	66.5622	3.22879e-09
CBX6	-0.234534	9.98939	51.1509	4.66322e-09
DNAJC6	-0.107773	10.6616	50.536	1.06103e-06
EIF4G2	0.199841	10.0176	36.6047	8.56813e-07
TCAF1	-0.0135741	9.97734	0.181694	0.742265
ITPK1	0.291672	10.0763	74.0763	3.96917e-14
SLC35F1	0.0711585	9.92089	6.23077	0.0911536
DDX24	-0.166176	10.1013	28.0112	3.17953e-06
NAV3	0.153653	10.268	34.7306	8.51683e-07
WARS	-0.158212	9.87434	89.203	8.58088e-06
EID1	-0.097805	10.0843	9.21776	0.00756341
MYO5A	-0.0392242	10.4182	3.38799	0.141906
ALDOC	0.000843969	9.86678	0.00360104	0.978726
KCNMA1	0.318207	10.0633	96.4402	4.94931e-16
NDUFAB1	-0.296125	9.92548	111.782	7.52307e-13
RPS27AP16	-0.0313107	9.85841	11.992	0.220738
FAM96B	-0.0393947	9.94292	1.68938	0.348453
PHLPP2	-0.0569901	9.91515	4.49974	0.171214
KARS	0.024276	9.88873	1.26835	0.534084
CMC2	-0.106435	9.97984	11.074	0.0091832
AC135782.1	-0.0784225	9.85336	242.805	7.2904e-05
RPL23	-0.0943591	9.97304	8.9701	0.0217836
ELP5	0.0145048	9.8634	1.57717	0.621332
ARHGAP27	-0.0371957	9.86054	14.282	0.177406
RAD51C	0.0678479	9.9312	5.4994	0.108949
ADAMTS10	0.0360437	9.85794	20.6232	0.137092
ETS2	-0.11435	9.86688	72.0103	0.000389928
CYB561	-0.0831034	9.85761	103.612	0.000989951
NFRKB	0.0123127	9.87495	0.533552	0.727725
EIF2AK2	0.179848	9.95788	32.329	2.30759e-05
SRP68	-0.0204456	9.91843	0.56968	0.625148
TCF4	0.1054	10.6402	50.7411	4.71997e-06
GPR150	-0.00822922	9.84943	51.9173	0.354523
FAM81A	-0.16931	9.89562	53.2626	2.32892e-05
SYT4	-0.282044	9.89094	164.739	7.03554e-13
DOK6	0.00654587	9.89706	0.0749716	0.871088
SMU1	-0.144254	10.0051	20.8218	0.000283876
BSG	-0.0686913	9.95862	4.6778	0.0989965
PIK3CB	-0.0845017	10.1062	7.18916	0.0182267
MAP2K2	-0.00830012	9.9686	0.0695284	0.841769
STARD3NL	-0.0224169	9.90171	0.835743	0.582882
SLC2A3	-0.0992347	9.86907	46.4446	0.00287426
GTF2F1	0.050596	9.88319	6.60794	0.180654
CPLX1	-0.177016	9.87795	94.0493	1.40901e-06
ERC2	0.207834	10.0469	35.8165	1.35641e-07
MRPS7	-0.0626786	9.87374	14.0429	0.0745089
AC010615.2	0.0498892	9.87054	11.0878	0.134446
SRSF10	0.385382	10.0442	133.99	1.14911e-21
ZNF540	0.0535559	9.90361	4.70165	0.192212
SIRT2	0.132506	10.1138	16.7306	0.000269919
RPS16	0.219819	10.0582	40.4573	1.74673e-08
PRPF31	0.12288	9.89252	30.0281	0.00193672
EPHB6	-0.217282	9.8889	101.049	2.6343e-08
ADD3	0.167483	10.3561	45.8837	6.6652e-09
GLT1D1	-0.0383115	9.86266	11.8892	0.190087
EPN1	-0.110659	9.90175	20.3143	0.00657236
YWHAQ	0.0446144	10.2363	2.44485	0.159828
DYRK4	-0.0307231	9.86435	6.4154	0.31132
ATRAID	-0.073516	9.879	15.5059	0.0462607
TOMM7	-0.279077	9.9893	75.7927	2.57651e-12
ACTR1B	-0.0815443	9.91681	9.2839	0.0503144
CXorf40B	-0.0337728	9.85578	25.3636	0.136216
BEX5	-0.52267	9.87992	784.907	2.32929e-45
SYP	-0.271478	9.96051	76.624	3.18022e-11
PORCN	0.00574743	9.8589	0.437795	0.822724
UXT	-0.0224787	9.88669	1.13957	0.561114
NDUFB11	-0.337659	9.91081	163.711	1.39037e-16
RGN	-0.00377386	9.89628	0.0256107	0.925265
CXorf40A	-0.0710649	9.86194	43.0554	0.0140131
SET	-0.105686	10.0137	10.2649	0.00751282
DNM1	0.00363808	10.0155	0.0118111	0.927391
STXBP1	-0.151361	10.014	21.6059	0.000119744
GNAQ	0.0272788	10.5079	2.23888	0.276916
ELAVL2	-0.0828353	9.88533	16.0235	0.0311389
RAD21	0.228972	10.0781	48.756	2.09407e-09
ZNF706	0.140003	10.224	23.0311	1.64738e-05
PEX2	-0.0558601	9.93752	3.68911	0.183572
ASPH	-0.0710291	10.0281	4.62733	0.0690584
XIAP	-0.00885507	10.0015	0.0752363	0.826519
BAG4	-0.121598	9.93601	17.4805	0.00364065
TRIM35	-0.0088148	9.87716	0.247466	0.807605
TUSC3	-0.0818096	9.88288	16.8528	0.0308583
AP1S1	-0.270731	9.89459	138.803	9.92387e-12
PEG10	0.0565177	9.92328	4.0974	0.18008
HSPB1	0.955813	9.97964	669.729	3.14128e-102
MLXIPL	0.0633748	9.86258	34.4039	0.0249308
TSPAN13	-0.173297	9.87503	101.597	1.29396e-06
SRSF3	0.0825912	10.0078	6.16188	0.0415165
GNL1	-0.0677218	9.88805	10.1807	0.0821502
ATXN1	0.0527861	10.6803	12.0013	0.0176859
RPL15P3	-0.0855043	9.85682	116.137	0.000459183
SPOCK1	0.0498449	10.8493	13.4988	0.0125106
PLK2	-0.23929	9.87515	196.79	2.61055e-11
ARHGAP10	0.0306408	9.86419	6.77628	0.303627
CCDC126	0.148906	9.91888	28.7422	0.000416662
LIMCH1	-0.0276179	10.7295	3.93138	0.195226
RGS12	0.0464244	9.92525	2.61432	0.271103
RNF168	0.179321	9.94621	34.2598	2.61062e-05
GYG1	-0.0862872	9.87444	26.2155	0.014957
NEK11	0.00579759	9.92603	0.0401586	0.890481
TUSC2	-0.160143	9.87517	86.3669	7.85728e-06
UQCRC1	-0.0105439	9.90355	0.175845	0.79705
SELENOM	-0.316802	9.92916	120.604	1.6185e-14
PES1	-0.0015784	9.87138	0.010627	0.962944
MAPK8IP2	-0.0197901	9.89461	0.733784	0.620785
HSPA13	-0.0454533	9.89189	4.23087	0.25106
NBDY	0.323685	10.1097	89.8694	4.59009e-18
ZNF449	-0.00288354	9.86686	0.047855	0.927548
RPL24P8	-0.000280667	9.85077	0.0124314	0.982875
SLC12A5	-0.186805	9.88827	75.6457	1.63733e-06
SLC23A2	0.0678127	10.0545	4.23353	0.0783556
CHPF	-0.0755926	9.8628	44.6889	0.0105788
PNKD	-0.160531	9.93291	30.4861	0.000118847
SLC39A10	-0.294882	10.0128	85.4128	3.24341e-14
HCG18	0.133823	9.91932	23.6908	0.00151193
DBI	0.0848818	9.99738	6.42542	0.0381126
EIF5B	0.116971	10.0529	12.1314	0.00256805
DCTN1	-0.241014	9.94879	67.0239	5.3023e-09
RPH3A	-0.149567	9.88786	49.0621	0.000121312
TTTY15	-0.419984	9.86948	831.318	2.05556e-35
HECTD4	0.20416	10.1578	43.7258	5.55265e-09
THAP2	0.12542	9.89193	32.1543	0.00151224
HSF1	0.0817785	9.89407	12.6718	0.0405141
DZIP1	-0.00427959	9.87315	0.0697893	0.901922
VMO1	0.0190625	9.85029	113.017	0.0764657
USP5	-0.103258	9.89058	22.3665	0.00874349
JTB	-0.086037	9.91951	9.44626	0.0392674
TM9SF3	-0.0994549	10.0409	9.69201	0.00963393
PDCD5P1	0.00348977	9.84883	68.6733	0.464729
B3GAT1	0.168518	10.1016	27.5371	5.29446e-06
PSMB1	-0.0190598	9.99686	0.349018	0.638347
PTGES3	0.867613	10.2684	719.23	2.65292e-141
SCAF11	0.258214	10.1504	66.9383	3.61388e-13
SF3B5	-0.143594	9.88492	49.169	0.000181736
MRPL51	-0.167671	9.91041	40.7856	4.7257e-05
EXOC1	-0.102559	10.0193	10.2974	0.00909102
WASF3	-0.224998	9.96139	53.4487	4.16564e-08
GLUL	0.0148853	10.2269	0.240932	0.640872
ALDH9A1	-0.0473094	9.88645	5.10888	0.220879
B3GALNT1	-0.125816	9.86005	169.938	5.8284e-06
TGOLN2	-0.116877	10.0273	13.516	0.0026775
PUS3	0.0893378	9.86387	62.2783	0.00204146
BANF1	0.0219736	9.90681	0.705919	0.594711
CROCCP2	-0.0175214	9.9498	0.335506	0.676488
RAE1	-0.00106821	9.88197	0.00305296	0.977326
RPL27A	-0.0658274	10.0386	3.90672	0.0885409
ABCB8	-0.0301255	9.88085	2.541	0.419657
PLPP3	-0.189803	9.97675	35.6797	3.04359e-06
FABP3	-0.141799	9.87279	73.6208	5.00915e-05
MARCKSL1	-0.451309	10.1103	179.824	1.37171e-39
NAA60	-0.0052056	9.86704	0.150556	0.870045
FBXW7	-0.0837288	10.1024	6.38258	0.0198357
ACTR8	0.0487886	9.87626	8.11968	0.171905
WRAP73	0.0433565	9.8756	6.47846	0.221921
CMPK1	0.0780095	9.95017	6.45098	0.0650941
CCNL2	0.184215	10.0292	31.4193	4.25889e-06
IDI1	-0.116339	9.95574	14.5018	0.00510649
RITA1	-0.0179147	9.85519	8.19404	0.408942
FBXL15	-0.0674667	9.87778	13.7071	0.0646671
C9orf116	-0.0391653	9.85129	162.804	0.010417
PRDX3	-0.0285957	9.89894	1.43348	0.480455
MKL2	0.0474912	9.96286	2.20275	0.257394
SSRP1	-0.0203146	9.87697	1.31883	0.574295
HES4	-0.244461	9.86369	414.902	1.95949e-15
MAPK3	-0.205027	9.89875	75.2348	3.64288e-07
NECTIN2	0.00941108	9.85685	1.64558	0.687493
KSR2	0.0498125	9.91211	3.37725	0.232211
ANAPC5	-0.291098	10.1605	102.323	1.10394e-18
GREM1	-0.159183	9.92416	30.2717	0.000132744
FAT3	0.0815166	9.89689	11.557	0.043238
POMGNT2	-0.151289	9.86808	115.179	4.45057e-06
S100A1	0.0165704	9.87708	0.764512	0.646245
PLPPR4	-0.0572625	9.89002	6.81566	0.145098
PTP4A2	0.173743	10.2354	36.3773	7.30562e-08
ANAPC10	0.204885	10.0567	36.2314	1.50072e-07
NR1H2	0.0412819	9.90053	2.88128	0.311044
TMEM121	-0.269505	9.86442	475.388	6.55186e-18
AC008026.1	-0.00909179	9.85396	2.70544	0.645474
PSMC3	-0.121937	9.90025	25.0871	0.0026473
GSK3B	-0.0585737	10.2619	4.8362	0.0554629
TTLL7	-0.0277073	10.9099	5.78319	0.146032
PEMT	-0.0372126	9.8676	7.28457	0.249283
PLCB1	0.257577	10.1025	64.6381	5.39841e-12
C1orf174	-0.0470327	9.86986	9.8691	0.159955
SIK2	0.261773	10.2923	90.0226	2.6288e-17
FAUP1	-0.0113313	9.85194	8.93123	0.483164
TMEM126B	-0.113798	9.9078	19.8835	0.00570231
NASP	-0.164572	10.1872	32.1753	4.22709e-07
GPBP1L1	0.108045	10.0635	10.992	0.00480251
ARL5B	0.0319645	9.88443	2.54786	0.401839
RASGEF1A	-0.014827	9.86139	2.05536	0.597529
NSMCE4A	0.0556516	9.9077	4.82462	0.178989
YWHAE	-0.20747	10.196	50.9963	1.00202e-10
NCOR1	0.14744	10.3509	39.0092	3.47849e-07
TSEN15	0.094543	10.0125	8.27472	0.0192136
CHID1	-0.168436	9.89465	53.2513	2.4314e-05
SLC25A3	-0.28047	9.95286	85.7465	8.54011e-12
MT1E	0.185117	9.91545	42.7837	1.08466e-05
LAMTOR1	-0.196385	9.91275	54.4719	1.93352e-06
NRAS	0.00701318	9.86908	0.243667	0.830916
MLST8	-0.0500629	9.85934	29.3044	0.0601053
PSME2	-0.0163355	9.86542	1.66686	0.59747
PALM	-0.00171277	9.88208	0.00765443	0.96366
COX8A	-0.396099	9.91342	223.358	2.80923e-22
SUCLA2	-0.0969352	10.0033	8.97138	0.0153637
FAM192A	-0.0234802	9.9713	0.567708	0.570972
RNF41	0.0117312	9.89099	0.282155	0.766207
PEG3	-0.0858478	10.0021	7.0794	0.0322313
DNAJC3	-0.0862409	10.0306	6.81444	0.0266547
RING1	-0.0175114	9.90026	0.520113	0.666849
KPNA2	-0.0275627	9.8665	4.32199	0.383718
AHSA1	0.571057	9.99309	274.225	2.77433e-40
PSME2P2	-0.00312301	9.84901	20.8978	0.634375
BBS2	0.125914	10.1579	17.2427	0.00028355
TMEM50A	-0.0758705	9.93773	6.5769	0.070488
ETFA	-0.090716	9.90265	13.2209	0.0262692
EMC10	-0.474769	10.0938	234.538	2.7569e-42
FAM173A	-0.260952	9.89477	131.128	5.53297e-11
FLYWCH1	-0.129343	9.90242	27.995	0.00150238
MBIP	0.0309896	9.9066	1.49132	0.453016
HIRIP3	-0.0412396	9.86791	8.8745	0.204277
ATG16L2	-0.0472498	9.89933	3.8789	0.243985
NDRG4	-0.314443	9.9218	128.476	2.34583e-14
SGTA	-0.0352927	9.95793	1.33155	0.39814
LAMTOR4	-0.206445	9.93474	50.0722	6.84845e-07
PELI3	-0.039976	9.86405	11.3765	0.185732
BAD	-0.104264	9.87235	40.7614	0.00267019
ZFP90	0.0394079	9.9697	1.5837	0.344804
BLOC1S1	-0.272984	9.89598	132.875	8.02596e-12
CDK5R1	-0.128568	9.89126	33.9897	0.00112622
SAT2	0.0400949	9.93218	1.8334	0.342789
SLC1A4	0.0930314	9.88833	18.9306	0.0167524
GPALPP1	0.0125473	9.90849	0.238389	0.761899
TVP23C	-0.133194	9.86933	83.7287	7.03594e-05
NFIB	0.125116	10.2989	20.1148	3.47214e-05
ODC1	-0.125944	9.85785	225.811	1.0258e-06
TVP23B	0.0151567	9.90673	0.355904	0.713548
EPN2	-0.136174	10.3687	35.208	7.44311e-07
XPC	0.0286927	9.89533	1.54779	0.474399
PTGES3L	0.00587353	9.85057	6.98559	0.633082
MED1	0.0127134	9.90537	0.257167	0.75753
RPS13P2	-0.000146918	9.84899	0.0544117	0.981221
ID2	-0.0966347	9.87671	29.0805	0.00766049
DUSP1	0.171234	9.86845	158.348	3.99696e-08
PIAS4	0.0869293	9.93693	8.68812	0.0403971
ZNF426	0.0282049	9.8801	2.28988	0.44596
PRDX2	-0.294465	9.8889	175.756	4.19174e-14
PRKACA	-0.309677	9.9203	132.622	5.62074e-14
2022-03-06	0.0596659	10.3337	5.72146	0.0400065
SMDT1	-0.176439	9.91099	45.7949	1.86447e-05
RAB11FIP5	-0.0519026	9.8609	26.201	0.0636646
FBXO27	-0.025753	9.89945	1.14358	0.525745
SLITRK4	-0.108795	9.87456	41.7343	0.00220774
MAGEE2	-0.00981443	9.84928	99.0859	0.236311
USP11	-0.10849	9.99267	11.5252	0.00720453
CLCN4	0.124704	10.062	14.4079	0.00118102
SLC27A4	0.0364977	9.89795	2.34327	0.366935
RAD23B	0.0125628	9.98706	0.153335	0.759523
SHC3	-0.0933452	9.90264	13.7859	0.0222003
VCP	0.118821	9.96052	14.5041	0.00489817
CHMP5	-0.0604821	9.92087	4.82904	0.148238
RRAGA	-0.170776	9.89893	49.8846	2.33663e-05
FDFT1	0.0521705	10.116	2.59122	0.146872
LUC7L2	-0.199572	9.92133	54.6133	1.52091e-06
EXOC4	0.012758	10.3822	0.311153	0.645068
CBLL1	0.121355	9.88606	35.705	0.00155149
CHN2	0.000461798	9.87481	0.000716703	0.989575
ARL4A	0.13637	9.90275	30.1776	0.000889027
ADAP1	-0.257815	9.91046	102.301	3.2725e-10
HCG11	-0.0357349	9.85603	27.1793	0.120304
CAP2	-0.193942	9.90942	54.8126	2.37832e-06
GMDS	0.215897	9.98711	39.0978	2.42348e-07
GABRG2	-0.157395	9.91026	35.9042	0.00013439
TMEM161B	-0.0391008	9.97881	1.52015	0.341876
TRIM23	0.0752224	9.9775	5.68301	0.0705928
RPL26P19	-0.082089	9.91084	8.74773	0.0473782
RPS27AP11	0.0193228	9.85098	52.4366	0.134961
NCBP2	0.0410671	9.87881	5.0821	0.261661
PSMD2	-0.156346	9.90509	38.6451	0.000132571
TMSB4XP4	-0.0689919	9.85717	74.9428	0.00512786
MCCC1	0.142759	10.0167	18.9239	0.000410162
TBL1XR1	-0.0561879	10.4138	6.77983	0.0356567
TAF9	-0.0406655	9.87343	6.21586	0.244803
COPG1	-0.0256659	9.88636	1.53439	0.506247
C3orf14	-0.129884	9.87733	51.7736	0.00036953
MAP4	-0.162863	10.247	35.7978	1.0728e-07
EMC3	-0.112025	9.94279	14.0171	0.00735389
POLR3H	-0.121893	9.8802	42.199	0.00107231
TXN2	-0.0896132	9.89504	15.0594	0.0251512
CLEC2L	-0.0395005	9.85615	31.8977	0.0884843
CDS1	-0.020578	9.86242	3.47393	0.476855
DGCR2	0.153704	10.0211	21.41	0.000135168
PRMT2	0.011071	10.1421	0.131193	0.750374
INTS1	-0.0338272	9.89593	2.10694	0.399727
DPM1	0.187344	9.92078	45.1915	9.62948e-06
FITM2	0.050388	9.86564	16.3229	0.0995213
SLC24A2	-0.100001	10.9749	93.2274	3.77737e-08
PKIG	0.147087	9.94883	21.7693	0.000542191
EDEM2	-0.0573314	9.88022	9.37678	0.123276
RIPPLY2	-0.0498513	9.86513	15.7924	0.107277
ZNF133	-0.04536	9.92016	2.72603	0.278403
SIRPA	-0.128081	9.97976	16.4777	0.00168415
PSMD1	-0.0280472	10.0499	0.752799	0.464245
RETREG2	-0.101066	9.92493	12.8979	0.0156559
KCTD18	0.0662608	9.88189	12.0051	0.0765821
UBE2G2	0.292343	10.0091	77.6037	1.47966e-12
PDE1A	-0.571098	10.3467	382.794	4.00931e-84
NPC2	-0.0798615	9.88484	14.4857	0.0371977
ZFAND2B	-0.0499434	9.88101	6.73098	0.181743
ACTR10	-0.119796	9.88939	30.464	0.00223374
EFR3B	-0.131974	9.9997	16.0844	0.000970855
OST4	-0.112163	9.8795	34.443	0.00248103
SNX17	-0.137623	9.88143	50.218	0.00025054
CBLN2	0.14729	9.89117	43.7175	0.000183155
RAP2A	-0.048425	9.94513	2.63454	0.248488
TXN	-0.271282	9.93279	88.4672	5.59946e-11
PGRMC2	-0.00310205	9.94346	0.0106474	0.941293
BRI3BP	-0.108044	9.90382	19.0228	0.008239
TYRO3	-0.0760219	10.0222	5.58095	0.053069
EDF1	-0.227399	9.95959	54.3277	3.08722e-08
ZNF865	-0.0687411	9.86468	31.5445	0.0255213
GFRA2	-0.0788898	9.86197	53.1	0.00651699
DNAJB9	-0.138266	9.87212	76.2868	6.76711e-05
NECTIN1	-0.102288	9.96336	11.1732	0.013478
AURKAIP1	-0.22375	9.9136	70.2144	5.72499e-08
TRIM8	0.181579	9.92129	42.5779	1.80187e-05
FH	-0.146713	9.87688	68.1174	5.4555e-05
CTSF	-0.0458432	9.94852	2.2398	0.274166
ABHD13	0.0557134	9.88823	6.97327	0.152271
LMO4	-0.255334	10.0404	62.6867	1.49538e-11
SDF2	-0.0297246	9.89064	1.79793	0.450623
TRAPPC3	-0.0177091	9.89436	0.594411	0.657722
FAM120B	0.152625	10.1396	23.5888	1.69088e-05
CHGB	-0.348551	9.89021	257.412	4.88856e-19
CDS2	-0.195562	10.114	40.2769	2.42555e-08
PTPN4	-0.0103584	10.0923	0.101251	0.777412
AP3S1	0.0648799	9.96203	4.19379	0.122502
SNX9	0.0450201	10.1944	2.33176	0.173648
UBE2J1	0.0274592	9.9046	1.19841	0.504387
MOAP1	-0.43765	9.89497	376.342	1.71434e-28
ALKBH5	0.0637999	9.95101	4.25863	0.130874
LINC01535	-0.146438	9.9179	29.8108	0.000424608
DOHH	0.0111814	9.91647	0.167504	0.789276
ZBTB8OS	0.174534	10.0175	27.3151	1.63761e-05
SORT1	0.120387	10.7573	84.9074	1.69846e-08
ARV1	-0.0871559	9.89843	13.3647	0.031069
SMUG1	-0.0654081	9.87145	17.844	0.0561173
ZC4H2	-0.0710069	9.98591	4.63477	0.0815542
PNMA8B	-0.20242	9.87603	135.362	2.14433e-08
MTCO3P12	-0.0394451	9.85145	151.178	0.0117846
B9D1	-0.0305591	9.88909	2.00163	0.4349
RNF175	5.15146e-05	9.86447	1.77783e-05	0.998648
EVI5	-0.00541952	10.27	0.0394633	0.859194
TPP1	0.118275	9.91581	18.918	0.00486027
ENSA	0.120319	9.987	13.3084	0.00370056
STPG1	-0.0147796	9.89979	0.373587	0.716055
FBXO44	0.0525895	9.89621	4.95533	0.19119
SLC25A33	0.0342633	9.89126	2.37357	0.385584
TMCC1	-0.0921365	10.2879	12.1655	0.00193855
PSMD13	-0.0995218	9.91272	14.426	0.016371
GABRA1	-0.246221	9.91483	83.9569	2.32185e-09
LUZP1	-0.0243781	9.89765	1.02762	0.546081
MRPL21	-0.228048	9.88036	144.985	1.01968e-09
KCTD2	-0.152982	9.88902	51.4594	9.17406e-05
ATP6V1B2	-0.253092	9.951	71.191	8.11151e-10
CAMK1D	0.21695	9.99293	43.3869	1.85411e-07
EPHA4	0.0123263	9.90924	0.219819	0.76627
MED10	-0.1899	9.90446	57.9939	3.26219e-06
TMEM177	-0.0621136	9.86418	27.0194	0.0411735
SRPRA	-0.0609504	9.88014	10.4805	0.101186
LUC7L3	-0.0490516	10.495	7.04902	0.0506334
AP4S1	0.0014275	9.91275	0.00287696	0.97266
TXNL1	-0.0896925	10.0237	7.83931	0.0220705
UBE2T	-0.0341208	9.85345	46.6772	0.0779916
ARHGEF25	-0.0302401	9.86398	6.46621	0.31503
PSMC2	-0.0902632	9.89742	14.7198	0.0251315
INA	-0.034445	9.88524	2.78436	0.369535
BMPER	0.0420957	9.88919	3.44525	0.281854
GLUD1	0.117514	10.0557	12.3802	0.00237988
CAMK2G	-0.0372414	9.91725	1.80412	0.372628
ATPAF2	0.0504784	9.88089	7.14315	0.174572
SNAPC3	0.154355	9.98029	22.7074	0.000222376
CCDC25	-0.116562	9.89877	24.2778	0.00393334
RAB39B	0.0528668	9.8753	9.87664	0.134731
MFAP1	0.127689	9.9144	22.7129	0.00232939
HAGHL	-0.0591887	9.87306	13.1108	0.0896653
WNT10B	-0.0593554	9.85229	224.034	0.000781819
HMOX2	-0.280169	9.91044	116.429	7.99237e-12
GRIN2A	-0.613751	10.0362	375.512	1.23563e-62
LCMT1	-0.100938	9.96703	10.5857	0.0145136
C1orf123	-0.162461	9.89588	49.3077	4.99625e-05
UBB	-0.0204958	9.86366	2.88792	0.491813
CMIP	-0.0614881	10.004	3.44992	0.125241
CLTC	-0.0955205	10.1325	9.89833	0.00596505
AC120114.2	-0.0269851	9.86667	4.21101	0.395158
TMEM127	-0.0290753	9.88259	2.21666	0.441448
CDC37	-0.216345	9.92601	59.5864	1.89092e-07
DUSP14	0.0711829	9.86455	35.8062	0.0163895
H2AFY	-0.126954	9.93273	19.485	0.00239304
NT5C3B	-0.0556698	9.88023	8.58414	0.134541
TACO1	-0.0732535	9.85946	60.7042	0.00651903
LSM5	-0.0199839	9.88823	0.872581	0.608158
AMZ2	-0.0209791	9.88675	0.980496	0.587647
VGLL4	0.306754	10.074	80.9598	2.36879e-15
GMPR2	-0.100535	9.87326	38.4265	0.00413732
GPS1	-0.115814	9.88017	37.0198	0.00187835
RNMT	-0.0290499	10.0312	0.800503	0.457579
TRAPPC4	-0.0889061	9.88272	20.0637	0.018866
CYSTM1	-0.00422596	9.8911	0.0355343	0.914736
USP1	0.0118953	9.89532	0.267923	0.766774
RPL10P16	-0.0527915	9.85973	28.4157	0.0505749
SAT1	0.0709033	9.95437	4.70205	0.0929043
NDUFB7	-0.312714	9.94021	111.978	3.21823e-14
POLR2I	-0.324861	9.9062	156.298	1.33501e-15
ORAI2	0.00943989	9.87132	0.377427	0.78068
NEDD8	-0.391636	9.94107	179.058	1.129e-21
FLOT2	-0.0663109	9.88817	9.62266	0.0889099
LINC00665	-0.0521029	9.91004	4.02439	0.208281
ZNF428	-0.198762	9.91529	54.6789	1.5299e-06
EGR3	-0.103361	9.85732	172.732	3.76758e-05
RUVBL2	0.0395267	9.88274	3.96019	0.294446
MYADM	-0.473665	9.90301	384.355	3.66738e-32
AAK1	0.0728341	10.1992	6.30622	0.0275059
PRRG3	-0.199874	9.87473	114.932	2.2132e-08
HPRT1	-0.0942278	9.99259	8.40748	0.0197683
MAP7D2	0.172005	9.90997	41.904	3.7139e-05
TTF1	0.0555536	9.91015	4.42398	0.181547
NTMT1	0.00936036	9.85505	2.46967	0.656799
FAM120A	0.162886	10.041	24.4071	3.70115e-05
OSTF1	-0.120219	9.99931	14.0396	0.00269646
DMAC1	-0.213078	9.89778	80.1164	1.1539e-07
POLR2K	-0.204783	9.88435	101.259	8.52639e-08
DECR1	-0.034706	9.92201	1.53166	0.407746
SDCBP	0.0127092	9.90534	0.250925	0.757606
TNKS	0.311349	10.4284	199.894	2.68983e-29
MTERF1	-0.26612	10.0916	66.5977	8.66963e-14
GNAI1	-0.110867	10.4626	26.6534	1.42246e-05
NEUROD6	-0.210733	9.86048	440.383	1.30532e-13
KDELR2	-0.00495763	9.8821	0.0654912	0.895144
CLVS2	0.0503522	9.88426	6.16455	0.185822
C6orf136	-0.0871415	9.8726	29.5617	0.0122103
AL136968.2	-0.000517738	9.84934	0.247566	0.949137
SMIM3	0.00734608	9.8498	27.4118	0.446179
SCAMP1	-0.0133057	10.0029	0.167718	0.741474
PTK2B	-0.0456799	9.92457	2.60177	0.276186
HSPB3	-0.0612101	9.85168	304.822	0.000202481
SMIM14	-0.0840233	10.0044	6.92181	0.0356759
RSRC1	-0.26047	10.1299	68.5769	2.6668e-14
MBNL1	0.248371	10.4729	137.252	7.7236e-21
PXK	-0.0327979	10.6296	4.05572	0.150184
RPSA	-0.0461235	10.0471	1.88997	0.229352
CBS	0.112813	9.89207	25.1796	0.00436133
FP236383.2	0.454115	11.0654	1334.97	2.36924e-131
ADRM1	-0.0567576	9.87203	12.2609	0.0995023
PSMA7	-0.199385	9.98017	39.4365	8.54821e-07
ACOT8	0.0530352	9.87241	11.3504	0.120684
GAB1	-0.0104561	10.7517	0.633447	0.619669
NNAT	-0.230806	9.86524	321.801	3.11518e-13
FRG1BP	-0.176688	9.8968	55.7458	1.07553e-05
TMEM230	-0.0478213	10.0148	2.20948	0.228586
SPCS3	-0.336793	9.9647	125.964	9.91851e-17
PLEKHA3	-0.0429876	9.97701	1.81355	0.296594
HIST1H4C	-0.323863	9.94834	116.264	2.93934e-15
PAIP2B	0.0506089	9.96692	2.56926	0.226361
TCEA2	-0.16801	9.90563	43.1388	4.04178e-05
MTIF3	-0.0145303	9.93571	0.246366	0.73018
BNIP3	-0.0511929	9.95776	2.67997	0.219774
UBE2QL1	-0.135217	9.86668	101.579	2.69032e-05
DDX50	0.0392301	9.96734	1.54247	0.347764
KCTD4	0.0265252	9.87949	1.98717	0.471425
TCTN1	0.0522811	9.86586	17.3372	0.0886799
STX1A	-0.0832073	9.87642	22.1335	0.0212527
PSME1	-0.0493675	9.87722	7.54975	0.173952
SEC16A	0.0837828	9.92286	9.04181	0.0471454
CD63	0.00961896	10.0134	0.0822986	0.809928
RALYL	0.613062	10.11	326.984	1.30688e-56
NR1D2	0.112411	10.0258	11.7732	0.00484988
PRPF38B	0.176668	9.97757	29.5124	2.56578e-05
KCNMB4	0.0275372	10.4066	1.23675	0.311067
SNUPN	-0.0156565	9.87392	0.900373	0.655305
TRIM69	0.0381275	9.87622	4.86021	0.286007
HNRNPA2B1	0.203187	10.4165	87.1634	1.73883e-13
RALBP1	-0.07534	9.98006	5.57648	0.0658716
TESPA1	-0.0272919	9.87756	2.23481	0.452996
NABP2	0.0337221	9.87228	4.57902	0.324272
RPL14P1	-0.0921837	9.85592	160.258	8.35268e-05
RBM27	-0.069492	9.8665	28.5977	0.0291292
CCDC124	-0.00861609	9.88522	0.172343	0.822271
HADH	-0.00482301	9.89577	0.0430314	0.904417
MKRN1	-0.00519065	9.91463	0.0378252	0.901
SNX27	0.0310215	10.1476	0.982468	0.371035
NIM1K	0.11493	9.94911	13.3289	0.00674258
HTRA1	0.0941449	10.3065	13.0088	0.00163846
PDZD11	-0.0599231	9.85706	59.462	0.0142448
ABRAXAS2	0.00415737	9.89243	0.0343715	0.916574
LINC00507	-0.0707257	9.85275	250.017	0.000149615
ARPC5	0.0585363	10.0164	3.22434	0.144099
DTD1	-0.273516	9.87508	256.461	2.48724e-14
RPS8	-0.0454372	10.0786	1.8855	0.220159
RALGPS2	0.0646653	9.87736	12.944	0.0727673
SLX1A	-0.0557589	9.8503	629.908	1.74356e-05
KCNIP2	0.0364646	9.86417	9.55147	0.219842
PHYHIPL	0.190997	10.3852	54.4853	1.39366e-11
SLIT3	0.0771041	9.87719	18.608	0.0319062
RWDD1	-0.0103706	9.92858	0.129173	0.805423
TRAPPC1	-0.177027	9.86989	126.621	1.7065e-07
ATAD3B	0.106348	9.87536	39.8741	0.00246773
NETO1	0.150437	9.88437	55.4977	7.06076e-05
SSR4	-0.26711	9.91133	103.966	7.56576e-11
TROVE2	0.0945655	10.0248	8.2747	0.0177116
EPS15	-0.117729	10.4283	30.5106	7.19941e-06
VPS29	-0.0483901	9.93949	2.66739	0.249458
CALR	-0.171021	9.88864	61.8119	1.1829e-05
FERMT2	0.143402	10.1282	20.3401	6.38535e-05
NFX1	0.172114	10.0223	26.9975	1.94132e-05
ROMO1	-0.177256	9.87674	97.0727	1.07569e-06
RABGGTB	-0.0670625	9.88554	10.7046	0.0812886
RPS7P1	-0.014541	9.85025	48.1531	0.226059
SPOCK2	-0.0569456	9.89568	5.85625	0.155835
RTCA	0.0829853	9.96463	6.89159	0.0482146
KCNK1	-0.149909	9.98337	22.0086	0.000219702
HBS1L	0.0447442	10.3041	2.98295	0.132932
SHTN1	-0.00736531	10.6582	0.249362	0.742786
PDCL3	-0.0499502	9.8737	9.15575	0.154672
CNIH4	0.0239445	9.91733	0.778771	0.567679
FBXO28	0.153736	9.97749	22.2287	0.000242777
CDK2AP2	0.124678	9.89367	28.4778	0.00174773
RTN3	0.00399439	10.4595	0.0364041	0.877937
MAP3K2	0.102082	10.1546	10.8192	0.00327034
COMMD8	-0.0857198	9.86431	49.7862	0.00513085
CACNG3	-0.106985	9.88784	24.6196	0.00598181
TIMM10	-0.134244	9.86899	83.4	5.71017e-05
SLC25A27	-0.0638107	10.0294	4.00604	0.102193
ETNK1	-0.0244264	10.207	0.704662	0.450939
GABARAPL2	-0.221787	10.004	46.3811	1.95969e-08
IRF2BPL	0.0360987	9.87231	5.13317	0.291406
AC091138.1	-0.0498907	9.8553	59.5234	0.0249371
SLIRP	-0.301707	9.92811	114.194	2.77745e-13
IFI27L2	-0.275162	9.9029	120.817	1.13867e-11
MAP2K1	-0.205904	9.954	45.2708	6.13466e-07
AL163051.2	0.0125706	9.85445	5.1688	0.53201
CTNNBL1	0.0683487	9.97878	4.50759	0.0998581
CINP	0.0476491	9.93162	2.72869	0.25974
PRKAR1A	-0.180356	9.98904	33.2609	7.4077e-06
RABL6	-0.0312766	9.91071	1.44867	0.450845
ALDH2	0.320673	9.93086	114.756	7.65754e-14
GRHL1	-0.00617329	9.85332	1.72839	0.740687
FAM57B	-0.00657502	9.85069	7.44425	0.614463
FTH1P20	-0.000560961	9.85145	0.0294798	0.96979
GLG1	0.0726694	10.2864	7.69129	0.0167206
CAMTA2	-0.013912	9.87999	0.553624	0.707419
NDEL1	-0.0994363	9.92821	12.4759	0.0175335
RPS19BP1	-0.0200272	9.92285	0.50796	0.633279
MAPRE2	-0.0890887	10.3651	13.8462	0.00132738
RPL41P2	0.0100893	9.85698	1.66341	0.668079
U2AF2	0.0804216	9.8983	11.6084	0.0471096
CNDP1	0.0173667	10.3911	0.434391	0.527611
RABEPK	-0.0483987	9.90342	3.79843	0.23717
MATK	-0.0491571	9.86238	20.0694	0.0912519
SMIM7	-0.116041	9.88206	35.2226	0.00209815
YJEFN3	-0.0523432	9.89048	5.54836	0.183751
MRPL54	-0.124131	9.8711	64.0075	0.000291048
UBAC2	-0.0127361	10.0153	0.146508	0.749166
RAB3C	-0.238923	9.90923	84.7688	5.63141e-09
[truncated: 14,956 more rows]

## Sheet: oligo_de_caudate
	logFC	logCPM	F	PValue
AC007325.4	-0.110213	9.7899	231.678	3.1948e-08
TCEAL3	-0.0730978	9.84683	15.5958	0.0109269
BEX2	-0.0965689	9.89252	21.3226	0.000692293
PGK1	0.266759	9.88786	152.211	1.91434e-19
TSPAN7	-0.39448	9.81387	804.375	1.38681e-50
TMSB4X	-0.32504	10.1031	283.303	5.57347e-49
MRPL41	-0.254072	9.83772	210.693	1.7466e-19
GRIN1	-0.332929	9.80147	857.757	1.84152e-42
PTGDS	-1.10278	10.1949	4297.62	0
MAPKAP1	0.00195223	10.0254	0.00766238	0.938186
ATP6V1G1	-0.000325381	9.86626	0.000266437	0.991097
HNRNPK	0.02249	10.0344	1.17904	0.367882
RPS6	-0.309042	10.0139	227.797	1.11423e-36
EIF3E	-0.021718	10.0092	1.01372	0.394846
CLU	0.819351	10.3334	2174.11	4.94065645841247e-324
NEFL	-0.378034	9.78849	3038.89	8.23761e-80
PTPRN2	0.146054	9.8435	60.8424	4.61036e-07
DYNC1I1	0.210095	10.069	80.0901	1.88418e-17
PURB	0.131356	9.90522	37.0828	5.46895e-06
PPIA	-0.313627	9.92873	226.338	1.81179e-31
CDK13	0.3476	10.3285	454.826	7.01353e-69
NDUFA4	-0.451454	9.94284	460.111	2.14554e-67
RRS1	-0.0161803	9.78463	11.8977	0.304714
PSMG3	-0.0552125	9.80152	24.942	0.0215751
SYNE1	0.477997	10.0733	457.148	5.97758e-78
AL356599.1	-0.117229	9.85411	36.251	4.51466e-05
FAM110B	-0.0184289	9.79556	3.85304	0.401845
TSPYL1	-0.122043	9.84764	42.6722	2.03463e-05
PPIL6	0.0971019	9.81466	45.8385	0.000239882
HSP90AB1	0.457954	10.3369	673.061	1.0319e-115
RPL10A	-0.315598	9.93267	227.276	4.11384e-32
ATP6V1G2	-0.13291	9.78395	812.753	2.56653e-16
ZKSCAN8	0.0244188	9.87619	1.40087	0.400635
NOL7	-0.054799	9.87025	7.54257	0.0578864
TUBB2B	0.168836	9.83184	94.914	2.5251e-09
FLOT1	-0.0619948	9.85096	10.781	0.0314565
CXXC5	0.0186853	9.9741	0.724964	0.483551
MATR3	0.362147	10.3318	555.324	1.14873e-74
VDAC1	-0.0218568	9.87235	1.15642	0.450483
MEF2C	0.0908863	9.83102	26.7843	0.0012922
SMN1	0.418086	9.86637	409.564	2.36333e-44
TCEAL2	-0.205209	9.80814	252.21	1.22613e-15
SMN2	0.44007	9.87189	443.171	1.21782e-48
SUB1	-0.191535	9.90151	82.7341	7.61991e-12
BASP1	-0.0680328	9.80147	36.3379	0.00466708
RETREG1	-0.160209	10.228	79.542	1.15704e-15
RPS20	-0.0561664	9.96351	6.71714	0.0355527
CPE	0.464492	10.0197	381.748	1.79365e-66
CISD2	-0.0925087	9.84906	24.7556	0.00128021
HNRNPDL	-0.0753084	10.2317	21.0668	0.000191177
TBC1D1	0.0119921	9.83397	0.452071	0.672581
QDPR	-0.303413	10.6621	893.645	7.85036e-104
ADD1	0.115752	10.2357	41.1771	2.26488e-08
NSD2	0.00491698	9.91119	0.0479691	0.862407
SLBP	0.794152	10.0237	991.975	9.2642e-176
IQCJ-SCHIP1	0.0494612	10.1263	5.46307	0.0297874
H1FX	-0.010652	9.83844	0.358841	0.70923
TCEAL6	-0.00938599	9.78742	2.4456	0.597865
RAB7A	0.133175	10.094	38.8557	2.23792e-08
FAM162A	-0.185779	9.83126	120.955	3.17253e-11
SHISA5	-0.140404	9.81077	110.962	7.0548e-08
SETMAR	0.148854	9.80597	157.031	1.24992e-09
PRKAG2-AS1	-0.022152	9.77912	182.814	0.0160554
DGCR6L	-0.216517	9.79979	413.111	1.22321e-19
DGCR6	-0.134283	9.79301	251.163	3.8671e-10
SMIM11A	-0.0426309	9.86026	4.78831	0.140764
SON	0.0883197	10.2237	26.6681	2.26816e-05
SOD1	0.295871	10.0805	186.348	5.35929e-33
SMIM11B	0.00939442	9.8538	0.239328	0.745983
TAF1	0.0931681	10.0152	17.5959	0.000297258
CDH4	-0.0209725	9.8056	2.81764	0.400482
RPL32	-0.245043	10.0574	143.153	1.61436e-25
BLCAP	-0.144258	9.83233	72.7379	2.83666e-07
NORAD	0.211534	9.95722	89.2897	2.90249e-14
MAP1B	0.221831	10.2155	145.009	4.25044e-25
PDRG1	0.00705288	9.79561	0.603028	0.747121
NSFL1C	-0.117594	9.85445	38.232	4.27923e-05
ITM2C	-0.0123031	9.86182	0.375557	0.67158
RPL37A	-0.134754	10.1868	56.1084	1.07287e-10
SPATS2L	0.217698	10.1446	101.3	2.08844e-21
CHN1	-0.0435267	9.89949	3.82256	0.126398
RASGEF1B	0.580824	10.3084	1077.35	8.46631e-170
ORC4	0.177253	10.0229	58.004	6.86012e-12
CMSS1	-0.0966559	9.86973	22.6532	0.000786353
RPL6	-0.266066	9.98874	159.551	6.7079e-26
ANAPC16	0.466353	10.0719	431.924	2.55619e-74
DCTN2	-0.117114	9.88656	32.4242	4.00645e-05
SRSF5	0.101067	10.0794	25.5094	2.67421e-05
GPX4	-0.27451	9.91031	171.563	1.84153e-23
CCDC59	0.34913	9.98406	208.276	8.45041e-37
TPT1	-0.0689628	10.1424	12.6872	0.00173027
MYL6	-0.261978	9.90265	160.464	3.5282e-21
GTF3C6	-0.233281	9.82706	211.403	3.5328e-17
CWC15	-0.145768	9.8607	56.8804	3.78283e-07
BEX1	-0.247433	9.87643	147.264	2.29582e-18
ATP6V1F	-0.316578	9.83183	365.46	5.00995e-30
PSMC6	0.00411278	9.90005	0.0373549	0.885671
FHL1	0.0562535	9.79969	29.1208	0.0148544
PFDN5	-0.250006	9.90105	145.197	2.47918e-19
ARF5	-0.0353426	9.7838	66.7889	0.0205259
MLLT11	-0.122461	9.79294	210.789	1.0202e-08
RNPS1	-0.0735565	9.88323	12.768	0.0103666
ZCRB1	-0.141061	9.81645	94.606	1.4482e-07
SSB	0.00512798	9.8788	0.0627703	0.859502
DYNLL1	-0.0124094	10.1136	0.366262	0.587239
PFKP	0.0910766	9.81025	46.6332	0.00038782
COPS7A	-0.159765	9.81347	133.532	1.5277e-09
SERPINI1	0.0951086	10.0203	17.6379	0.000205098
TMEM120B	0.0903874	9.81139	45.024	0.000479913
UBE4A	-0.202561	10.0412	98.0176	3.51328e-17
NUCKS1	0.0929926	10.2206	27.5563	8.77645e-06
DNAJB6	0.637003	10.1534	874.489	1.33154e-152
NDUFC2	-0.774844	9.84164	2093.11	4.33252e-180
CDC42	-0.318384	10.0473	251.239	7.92481e-42
SUMO2	-0.115861	9.91703	29.6642	3.13938e-05
RPL35	-0.203679	9.99815	93.3132	6.67622e-16
NDUFS8	-0.299307	9.83194	323.211	5.92678e-27
NRXN3	-0.607864	10.6614	2410.2	0
LDHB	-0.12487	9.93389	33.3982	4.94693e-06
ISCA1	-0.0105423	9.87059	0.273804	0.71627
FAU	-0.424027	10.0716	471.897	6.89556e-79
RPL27	-0.307711	9.91834	216.144	1.04708e-29
PLD3	0.0604438	9.95053	7.34434	0.0279061
CELF1	0.215246	10.0328	91.9723	5.51325e-17
MPHOSPH10	0.0433838	9.86213	4.81158	0.136613
NDUFB10	-0.410425	9.85583	493.163	1.63697e-48
THYN1	-0.0891044	9.80659	52.2101	0.000421313
LINC00294	0.00317008	9.80105	0.0862999	0.893693
C11orf58	0.0809926	9.96229	13.6007	0.00293077
HLTF	-0.0658328	9.94805	8.83762	0.0152598
PSMA1	-0.171445	9.82078	126.088	3.19906e-10
HRAS	-0.271164	9.80721	465.596	2.05395e-26
LRRC27	-0.0508841	9.79237	39.1179	0.0144957
MRPL57	-0.286784	9.82401	338.079	1.27793e-25
COX6A1	-0.44685	9.89656	487.632	3.95289e-60
THRA	0.255935	10.0168	136.379	2.13275e-22
ZNF638	0.0598323	10.645	48.2652	6.69285e-05
ATP2B1	-0.212171	10.03	97.544	2.54071e-18
PPT1	-0.154241	9.84724	70.8555	6.70462e-08
RPS18	-0.314171	10.0693	249.436	1.15428e-42
SCG5	-0.453767	9.87639	540.262	3.23416e-60
HSP90B1	-0.115742	9.97008	28.1061	1.10079e-05
RPL19	-0.257878	10.0713	165.605	5.36353e-29
YWHAG	0.302613	9.96079	173.159	3.77804e-27
PFDN4	-0.108915	9.81261	62.6719	3.49197e-05
RNH1	-0.596713	9.95716	905.195	2.10051e-124
RNF11	0.0790434	9.88633	13.6994	0.00656929
YTHDF2	0.0452831	9.86524	5.06333	0.120402
KCNAB2	-0.00593947	9.79526	0.424734	0.785321
ACTB	-0.161276	10.3151	112.588	3.0885e-18
RPL4	-0.153086	9.87837	57.5471	8.16086e-08
ADD2	-0.0952435	9.78767	222.765	3.07612e-07
MRPL30	-0.0155573	9.78481	10.5244	0.328278
TESC	-0.166589	9.78516	987.821	8.03625e-22
SH3PXD2A	0.00807744	10.0216	0.128676	0.749291
AP2M1	-0.10295	9.86628	27.2375	0.000349187
ACBD7	0.038582	9.78107	236.121	0.000366577
CLDND1	-0.371998	10.3805	751.832	4.73286e-106
PFDN2	-0.375753	9.88452	356.324	1.23148e-41
BTF3	-0.342647	9.9116	277.701	3.02922e-36
AASDHPPT	0.0305342	9.87312	2.26513	0.29396
SGIP1	0.596443	10.2369	909.276	8.94898e-158
HSP90AA1	0.425991	10.7425	1471.43	4.07938e-178
RPS5	-0.310142	9.95559	216.784	1.5007e-32
SNX3	0.311394	10.0046	186.524	3.87689e-31
YWHAH	-0.224363	9.81878	231.273	1.04618e-16
UBC	0.348768	10.1805	301.394	7.83177e-54
TPI1	-0.202011	9.84129	128.853	1.02592e-12
EEF1A1	-0.151523	10.2491	79.9166	1.24076e-14
FAM13A	0.295539	9.90044	162.54	1.18847e-23
PPP2R1A	-0.0756147	9.87099	14.2328	0.00872979
H2AFZ	-0.130837	9.87059	42.4878	5.1102e-06
C1orf216	-0.00704326	9.78929	1.07979	0.710084
GPR162	0.0014698	9.78138	0.253566	0.903696
NFU1	-0.313591	9.85878	268.245	1.42804e-28
SNCB	-0.0345567	9.78023	207.193	0.00209905
SELENOW	-0.114693	10.1961	42.1239	3.24751e-08
ZNF252P	0.00786423	9.82449	0.239756	0.776363
TKT	-0.212629	9.89641	106.547	3.31617e-14
CFL1	-0.22064	9.94469	108.65	1.47618e-16
CHD5	0.0201951	9.78341	25.5407	0.15295
TCEAL1	-0.000576328	9.80864	0.00204796	0.981997
NPM1	-0.0367009	9.9481	2.86008	0.177759
RPL11	-0.237035	10.1247	156.622	2.30966e-27
MECR	-0.0536629	9.80728	18.139	0.0343087
CSDE1	0.109173	10.002	25.0685	3.05216e-05
TAF13	-0.0621866	9.82036	16.8615	0.0225878
CACUL1	0.174478	9.95079	57.2067	3.87082e-10
RPL22	-0.163263	9.97299	58.3408	3.85885e-10
TIMM8B	-0.253012	9.80136	517.323	2.28647e-25
ZSWIM7	-0.00778927	9.85347	0.164804	0.787992
C9orf78	0.064341	9.84138	12.6712	0.0253899
MRPL33	-0.262667	9.85944	187.955	2.32713e-20
TRA2B	0.300839	9.97683	179.275	1.07218e-27
AJAP1	0.0489442	9.85706	5.93604	0.0928422
PAPSS1	-0.0276594	9.93705	1.50359	0.315829
RPL3	-0.243696	10.0625	147.458	1.63699e-25
NCDN	-0.371604	9.82786	524.33	1.53222e-41
DNM3	-0.0203899	10.8272	8.98455	0.123062
BCKDK	-0.0247936	9.78885	14.0622	0.187861
MRPL20	-0.0356642	9.84435	3.84607	0.214468
PITHD1	0.0394692	9.87099	3.85184	0.175421
ZNF429	-0.107349	9.86955	28.1924	0.000189632
RPS25	-0.262298	10.0219	163.27	4.90042e-27
UCHL1	-0.259307	9.87909	159.381	4.10442e-20
POLR2G	-0.249327	9.82307	263.177	8.63606e-20
UROS	-0.120857	9.85996	38.8118	2.63685e-05
SRP14	-0.204548	10.0462	99.5549	1.1261e-17
PEBP1	-0.154782	10.2345	83.7058	7.41011e-15
WIPF2	0.173048	9.95779	55.8264	4.02276e-10
ESD	-0.0201451	9.86565	1.01134	0.48729
PRDX5	-0.0956774	9.86375	23.6393	0.000899763
ATAD3A	0.0171888	9.79884	2.87397	0.454637
ENO1	0.2734	9.94033	145.742	8.57194e-22
CCDC91	-0.00952	10.0888	0.178902	0.68481
RPS13	-0.301252	9.9648	201.395	2.36782e-31
BZW1	-0.0928687	9.8808	20.6062	0.00120186
ACTG1	-0.118719	9.98103	29.8212	4.96316e-06
UQCRB	-0.235698	9.91724	122.366	8.77385e-18
MGST3	-0.194882	9.92621	82.5183	9.9369e-13
TOLLIP	0.0413379	9.83676	5.5716	0.147645
RAB2A	-0.0399312	10.144	4.20918	0.0703943
SDHB	0.0176947	9.86533	0.771454	0.543001
PSMD4	-0.0752021	9.87081	13.944	0.00910923
CYC1	-0.313279	9.83112	361.23	1.71575e-29
DPF1	0.0465432	9.79931	20.2022	0.0431392
PSMB4	-0.184013	9.86471	89.7168	1.22655e-10
BBS4	-0.17148	9.8521	79.9394	2.01809e-09
HINT1	-0.359444	9.94137	295.608	2.49908e-42
RPS27	-0.276934	10.1946	239.7	2.09287e-42
IRF3	0.0362229	9.80707	8.52975	0.149602
PRDX6	0.2649	9.87591	157.971	4.24824e-19
GRM2	0.00421538	9.77761	88.433	0.329219
MRPS14	0.166055	9.84325	82.6135	1.00545e-08
ANKRD2	0.0289655	9.78099	126.436	0.00840535
RTN1	0.2805	10.1502	171.528	3.3608e-34
CYFIP2	-0.0949399	9.86938	21.5538	0.000976455
HSBP1	-0.17737	9.8824	75.8752	4.29764e-10
PSAP	0.220467	10.2752	182.774	1.99451e-27
MAP1LC3B	-0.0780601	9.88427	14.3848	0.006469
ST6GALNAC4	-0.0224496	9.78157	51.7383	0.0791285
RTP1	0.00378325	9.77746	128.347	0.302986
DYNC1LI1	0.0824885	9.89791	14.5219	0.00430647
ARHGAP32	0.086285	10.1205	15.9867	0.000178171
SNRPN	-0.212804	9.8374	146.889	4.53411e-14
SNX10	-0.0143996	9.78646	6.59577	0.40183
HLA-B	0.427603	9.85982	445.591	1.1995e-46
TMCC2	0.280466	9.96152	154.16	1.05059e-23
NDUFS5	-0.395135	9.87813	402.592	1.16685e-45
RTL8C	-0.290918	9.82797	327.45	7.04369e-26
APOE	-0.295324	9.99961	180.51	1.64756e-32
BROX	-0.0807193	9.93223	13.8631	0.00337114
TRIR	-0.142354	9.86712	52.1105	6.95818e-07
PPA1	0.189291	10.156	85.0501	4.89272e-17
GPRASP2	-0.060106	9.78363	191.569	9.12108e-05
SLC29A3	0.115101	9.81999	58.1229	2.27943e-05
PREPL	0.187395	10.0377	74.5142	1.85527e-13
PDCD2	-0.149885	9.80789	141.358	4.59911e-09
LIPA	-0.305897	10.0489	234.893	9.51927e-39
CMAS	-0.071907	9.83856	16.5489	0.0115763
TSC22D1	0.319046	10.1958	234.339	5.23233e-47
CALM1	-0.101497	10.4041	61.9005	5.26267e-09
SPINT2	-0.469964	9.89552	542.964	1.58558e-66
NDUFB1	-0.233035	9.85524	149.758	2.75491e-16
SH3BGRL3	-0.0349386	9.80007	10.9205	0.138174
RPS7	-0.2896	10.0093	194.989	6.11812e-32
SPIN3	0.0355987	9.83821	3.72424	0.213448
FSTL5	0.170585	9.82382	104.197	6.23819e-10
RAB1A	0.236006	10.0232	111.565	1.25682e-19
FAM204A	-0.122737	9.89792	33.0121	1.41667e-05
MEG3	0.0455628	9.89119	4.43301	0.115052
CRIP2	-0.0462483	9.79434	27.4394	0.0325493
SF3B3	0.0415659	9.88234	3.97164	0.152221
PKM	-0.0466525	9.87262	5.16455	0.10642
PSMC5	-0.229638	9.83774	177.49	3.73861e-16
RCN2	-0.303832	9.95722	210.345	2.27022e-31
RPS14	-0.242529	10.0476	142.212	1.62665e-24
RABAC1	-0.584648	9.88371	906.948	2.04067e-102
RPS17	-0.00869719	9.78033	13.6957	0.425267
SNCA	0.349483	10.0122	202.466	5.52388e-39
NME4	-0.0978685	9.79343	130.273	5.25865e-06
FBXL16	-0.241672	9.78756	1402.26	2.4213e-36
BEX4	-0.346319	9.90801	288.839	8.93263e-37
CALM3	-0.233713	9.8291	204.778	4.22967e-17
ANXA2	0.200192	9.79878	417.293	3.9045e-20
BAIAP3	0.0270664	9.78052	142.39	0.00867314
PPP1R1B	-0.84232	9.81672	3779.04	3.07789e-231
ELOB	-0.480291	9.90389	561.496	1.31673e-70
CNTNAP1	0.013616	9.78882	4.33495	0.461366
SNN	-0.053382	9.79775	28.7971	0.0197761
RPL12	-0.279873	9.91233	174.865	1.93989e-24
C16orf45	0.118563	9.92923	26.8016	2.7499e-05
FOXP4	0.0713176	9.81484	25.6527	0.0071272
ALDOA	-0.12761	9.94636	34.5785	2.24152e-06
PSRC1	-0.205542	9.87279	108.915	5.19154e-13
HPCAL1	0.152699	9.82769	84.0623	4.8517e-08
TRIAP1	-0.118866	9.78829	325.422	4.90944e-10
FBXL19	-0.139287	9.81251	103.062	1.1963e-07
AP2S1	-0.149102	9.83008	81.0928	9.78191e-08
MT1G	0.589061	9.84906	892.357	2.86184e-89
PAFAH1B1	0.238771	10.2746	215.387	1.11577e-31
DGKZ	0.0943402	9.82475	34.9687	0.000664619
RABEP1	0.242634	10.0539	120.238	6.71352e-22
SOX15	-0.0289471	9.78459	37.0574	0.0682027
SRRM3	-0.108212	9.79671	120.461	1.94614e-06
EIF1	-0.196938	10.2745	139.993	5.61816e-25
G6PC3	-0.135116	9.79821	176.758	6.5277e-09
NSG2	-0.548299	9.79829	2896.91	1.73882e-119
NSF	-0.296475	9.9869	185.81	7.16679e-32
GAP43	-0.211501	9.79324	569.663	2.69474e-22
DDX5	0.21935	10.306	198.333	1.47697e-28
KCND2	-0.0939154	9.8579	22.4698	0.00111567
ARPC2	-0.160782	9.87558	62.1	1.80027e-08
RPL38	-0.23589	10.0012	126.732	4.27732e-21
WBP2	0.134301	9.95699	37.8853	1.10074e-06
QKI	-0.0715462	11.1606	246.779	5.18906e-11
AC016588.2	-0.00172407	9.78327	0.189784	0.904248
APP	-0.215833	10.6182	605.056	2.97579e-49
OAZ1	-0.0411084	9.97441	3.59175	0.12022
RPS4X	-0.160628	9.96639	55.7716	9.87569e-10
RTN4	0.0527901	10.691	45.0315	0.000285375
PPDPF	-0.703082	9.87717	1363.32	2.03141e-149
ARF3	-0.202813	9.81171	225.86	9.89618e-15
THOP1	-0.0254247	9.81088	3.63888	0.327783
LGALS3	0.0433803	9.78701	58.6807	0.0104112
EEF2	0.000759351	9.98848	0.00127254	0.976857
UBL5	-0.369985	9.91013	321.267	4.14507e-42
CLIP2	0.166576	10.1426	67.7079	2.6531e-13
PIN1	-0.252367	9.83025	235.95	1.2348e-19
RPL13A	-0.0496881	10.0905	6.21553	0.0328128
AL078621.3	-0.00646894	9.77924	15.2288	0.475137
RPS11	-0.181309	9.98255	73.4686	1.88096e-12
EPDR1	-0.25283	9.7937	802.156	1.87518e-30
ZNF814	-0.0281763	9.8624	1.9991	0.330932
ITGB1BP1	0.110057	9.88546	26.8386	0.00016224
GPM6A	0.622706	9.95451	692.295	4.78163e-100
VSNL1	0.0225778	9.78457	23.9039	0.137836
SLC25A4	-0.362543	9.85806	373.378	6.21972e-38
STMN1	0.246749	10.1127	142.885	2.84139e-25
CALM2	-0.117165	10.3129	60.6037	3.54948e-10
PIK3R1	0.129725	10.2955	59.3076	4.42016e-11
PRKCB	-0.379369	9.93642	296.942	1.11556e-46
OIP5-AS1	0.0895948	9.98156	16.4665	0.000792099
BCYRN1	-0.0600888	9.78491	142.677	0.00025709
RPS27A	-0.12927	10.1052	41.993	1.1756e-08
DYSF	0.00234342	10.0773	0.011202	0.92159
TMSB10	-0.239766	9.88947	128.179	1.42531e-17
MOB1A	0.025674	9.87351	1.56149	0.377292
PNMA6A	-0.032537	9.77859	608.619	9.89843e-05
IDS	-0.128505	9.95627	35.467	1.46834e-06
HS6ST2	-0.0427819	9.78639	57.7599	0.013874
NDUFA1	-0.387506	9.86952	395.921	1.55035e-43
FAM199X	-0.0400414	9.86971	3.8788	0.166403
TCEAL7	-0.435826	9.86154	537.483	8.35822e-55
ARMCX1	-0.0819035	9.79851	65.1735	0.00042389
PCSK1N	-0.433054	9.85824	519.909	4.84029e-54
RPL9P7	0.0305423	9.78508	41.4289	0.0494891
HDHD3	0.0850334	9.7974	79.6134	0.000121175
CTSL	-0.0646556	9.87962	10.2007	0.0246306
YWHAZ	0.0653706	10.1208	10.5967	0.00437862
SNX16	0.104336	9.83533	35.3095	0.000255385
FABP5	0.295252	9.84778	241.157	6.83017e-24
ATP6V1H	0.203551	9.93245	76.5848	8.75118e-13
AC120036.4	0.000445957	9.78415	0.0103442	0.976502
PPP2CB	0.35881	9.94796	241.96	3.94326e-36
DPYSL2	-0.128716	10.6164	216.392	4.33709e-18
AC090114.1	0.00919211	9.78217	7.72238	0.478644
RUNDC3B	-0.0179406	9.79239	4.77772	0.384702
PCLO	0.0257409	9.84409	1.8794	0.371876
CHCHD2	-0.253955	9.9375	144.749	2.79177e-21
STMN2	-0.314798	9.79182	1433.63	6.94362e-49
YKT6	-0.0426596	9.80138	15.2124	0.0749568
SOD2	0.371332	9.94876	252.07	1.61638e-38
GTF2H5	-0.197639	9.8274	147.104	1.05884e-12
PCMT1	0.00121156	9.94849	0.00301452	0.964638
LMBRD1	-0.118476	10.0213	30.3935	1.87062e-06
RPL7L1	-0.0779985	9.85459	16.859	0.00681605
TUBB2A	0.00474457	9.80918	0.131804	0.853127
CPEB4	0.308642	10.2079	267.586	3.32511e-45
ATP6V0E1	-0.0723707	9.93582	11.2341	0.00840379
PDP1	-0.0901569	9.79905	74.3497	0.000118647
RPL10P9	-0.506562	9.83655	857.074	3.16824e-75
SLC6A7	0.0044344	9.77779	55.4146	0.378721
CXCL14	-0.152893	9.78384	1076.15	5.20532e-21
UQCRQ	-0.223525	9.83636	168.172	2.01673e-15
REEP5	-0.119151	9.93662	30.7591	1.25823e-05
AC093591.1	-0.0644735	9.7842	190.733	4.99528e-05
GAR1	-0.0586022	9.79043	62.7588	0.00326803
FAM47E	0.0287269	9.79053	16.0992	0.13772
SEL1L3	0.0394689	9.78536	65.2361	0.0117516
SSBP1	0.029337	9.97462	1.82474	0.2717
LETM1	-0.122341	9.82546	58.3465	9.96502e-06
HES1	0.0466312	9.78439	114.781	0.00145637
NDUFB5	-0.290367	9.85666	237.188	1.23638e-24
EIF2A	-0.0806435	9.81802	30.2287	0.00283229
PHACTR1	0.195934	10.1111	78.4405	1.07395e-16
LPP	0.0904072	10.1343	17.7672	6.88776e-05
PODXL2	-0.014851	9.8039	1.63168	0.544971
TPRA1	-0.0838517	9.80717	44.6025	0.000951393
LSAMP	-0.0382464	10.604	9.3595	0.0117643
RPL14	-0.322677	9.97218	238.698	1.73771e-36
CHL1	0.195158	9.82038	160.648	6.3176e-13
ZNF483	0.264495	10.1189	162.2	5.45442e-29
XRCC6	-0.0343643	9.9033	2.60886	0.226673
CSNK1E	-0.060392	9.86687	9.22681	0.0366214
LGALS1	0.337991	9.82859	419.813	1.02435e-33
TIMP3	0.1033	9.79405	150.689	4.87654e-07
DRG1	-0.143539	9.84829	59.1325	5.24043e-07
NOL4L	0.0957264	9.98966	18.5309	0.000301719
FTH1P10	-0.955758	9.82133	4354.47	2.52073e-295
MTERF4	-0.0682714	9.82305	19.5555	0.0131399
COPS9	-0.311673	9.87745	243.673	1.42886e-28
PTMA	-0.222361	10.5189	368.615	9.23215e-46
SP100	-0.0508405	9.79367	34.4651	0.017423
SERPINE2	-0.138067	9.8129	95.8243	1.6359e-07
C2orf69	-0.00344926	9.86119	0.0306312	0.905449
HIBCH	0.628816	10.2995	1154.93	8.43358e-193
KIF5C	0.259039	10.1006	147.992	5.76897e-27
CCDC115	-0.1551	9.80396	176.212	3.99889e-10
RPL31	-0.100667	9.87635	24.5487	0.00045504
MGAT4A	-0.0626564	9.96504	7.67339	0.0187286
COX5B	-0.357038	9.947	293.238	2.87225e-42
BCAP31	-0.228251	9.81835	240.006	2.73115e-17
RPL13AP25	-0.268284	9.78887	1426.53	4.27465e-41
HCN1	-0.0618088	9.79656	40.6258	0.00608741
NUDT4	0.122879	9.81281	79.7457	2.45141e-06
TIMM13	-0.270897	9.82413	302.021	5.44298e-23
LGMN	-0.0177204	9.84055	0.96229	0.536036
HIKESHI	0.00645486	9.89351	0.0917941	0.822329
GRIA3	0.296509	9.88175	178.028	1.88013e-23
SYT17	0.0557791	9.79016	64.175	0.00315167
STARD3	0.0324063	9.81779	4.83365	0.229302
MTCH1	0.43195	10.0268	376.235	4.55868e-59
PAPOLG	0.0793287	9.88309	13.8749	0.00645774
AP003170.4	-0.02688	9.77817	705.173	0.000207995
EMC9	-0.0749053	9.78446	244.967	3.8135e-06
TUFM	-0.376552	9.86448	392.275	5.57258e-41
VBP1	-0.0999088	9.84741	29.5094	0.000495129
PSMB5	-0.216171	9.86682	123.2	3.29121e-14
SBNO1	0.202339	9.98932	79.3687	5.11942e-14
AC064799.1	-0.302911	9.8177	422.927	1.71814e-29
HIP1R	0.0523763	10.0564	6.38846	0.0324635
CHPT1	0.219312	9.85558	117.921	9.04546e-14
POLR2D	-0.0760955	9.83011	20.9958	0.006682
DNAJC4	-0.0916811	9.79109	143.032	7.17766e-06
AL118558.4	-0.00253149	9.77932	2.24282	0.780921
GLRX5	-0.148265	9.817	103.578	3.49036e-08
UBE2B	0.644592	10.1449	886.392	2.12117e-153
AL035071.1	-0.0680256	9.7961	52.2951	0.00238123
B4GALNT1	-0.0767558	9.77984	1168.41	8.03517e-12
RPS29	-0.0479983	10.0388	5.27074	0.0511832
KIF5A	-0.0799585	9.81945	27.2592	0.00325316
HCFC1	0.111962	9.80931	77.0139	1.06205e-05
RPL21	-0.142511	10.1296	54.0653	1.04589e-10
KLRG1	0.0260658	9.84007	2.03024	0.363425
PIANP	-0.12994	9.78207	1266.98	2.65464e-19
NDUFS4	-0.0964071	9.97514	18.3881	0.000239384
ZFP28	-0.0432634	9.80105	15.8752	0.0699018
NRGN	-0.951013	9.80553	7115.68	0
CCDC82	0.107766	9.98083	24.0838	5.73504e-05
GMFB	0.023334	9.83597	1.80211	0.412782
DYNLRB1	0.0847064	10.0421	15.7161	0.000698107
HNRNPC	0.235574	10.3369	237.622	3.78514e-34
AC113935.1	-0.249383	9.87913	152.54	1.0947e-18
HSPA8	0.190017	10.0276	72.8455	1.59655e-13
SCAF1	0.00249816	9.82036	0.0274753	0.927007
RAD54L2	-0.00455259	9.93825	0.0404533	0.869066
EPHX1	0.0836954	9.89808	15.1729	0.00377271
ISCU	-0.14452	9.83609	70.9175	3.18756e-07
C2CD2L	-0.0625031	9.79411	51.4375	0.00383091
BRSK1	-0.148039	9.85265	61.7884	2.38777e-07
NSG1	-0.147351	9.78453	874.594	1.59027e-18
VAMP2	0.063175	10.0284	8.74525	0.0124583
TPM3	-0.0875523	9.85702	20.2958	0.00238582
GSTM3	0.024221	9.79173	9.93116	0.226647
SLIT1	-0.00989587	9.78753	2.59445	0.5798
EIF1B	-0.106966	9.89593	26.4593	0.000162424
TTC3	0.305558	10.3217	372.968	9.33744e-54
RPL18	-0.241182	10.1168	159.751	7.16264e-28
CCT3	0.368811	9.97907	263.904	2.85977e-40
CSNK2B	-0.218486	9.81252	252.364	1.00757e-16
ASPHD1	-0.216406	9.81064	267.478	9.64272e-17
PCSK2	-0.297646	9.79901	781.921	5.31553e-36
ZNF271P	-0.0594576	9.91227	7.36668	0.0345546
HIGD1A	-0.0989644	9.79687	104.493	1.37887e-05
NDUFB8	-0.623507	9.83594	1421.87	3.40044e-115
TIPIN	-0.0722497	9.81716	23.8065	0.00725979
AFG3L2	-0.102081	9.84795	30.3275	0.000373093
RPL9	-0.216416	10.0387	111.255	2.31747e-19
CRYAB	-0.10116	10.58	47.1261	3.657e-11
NDUFS2	-0.0512783	9.91859	5.83176	0.0670203
SARAF	0.0925856	10.0751	19.9727	0.000125811
MORF4L1	0.108618	10.0531	26.9937	1.16363e-05
S100A6	0.142016	9.95323	36.5896	2.93017e-07
RPL13AP5	-0.280433	9.79461	917.651	6.45536e-36
AC024293.1	-0.238332	9.80681	358.568	6.92163e-21
CCK	0.121217	9.78668	563.148	2.36663e-15
YAF2	0.128019	9.96373	28.7933	2.85346e-06
USP14	0.104093	10.0092	22.4002	6.08464e-05
ERI3	0.245897	10.0024	117.085	2.87453e-20
RSU1	-0.101077	9.91225	19.8594	0.000306289
SARS	0.0830647	9.93609	14.2636	0.00298183
RPS21	-0.254149	9.99633	143.206	4.3241e-24
AKR1A1	-0.21981	9.82856	181.202	2.58253e-15
APH1A	-0.15472	9.80747	153.488	1.30281e-09
CDC5L	-0.088478	9.91117	17.034	0.0016195
PMVK	0.0559712	9.83553	10.4663	0.0495492
ATP6V0B	-0.346778	9.93927	279.607	3.15145e-39
SNX7	-0.101463	9.80512	68.7516	4.86735e-05
ERCC1	0.0392915	9.84395	4.53522	0.173046
RSL1D1	0.0197854	9.82362	1.59128	0.473587
ARFIP2	0.0296317	9.80017	7.97542	0.204679
OSCP1	-0.0493266	9.79021	45.6407	0.0125267
PGAM1	-0.083563	9.85823	18.6932	0.00376128
HSPA9	0.553479	10.0026	568.039	2.40773e-88
TOP2B	0.0173749	10.074	0.690404	0.467616
RTN4R	-0.0188981	9.77853	235.41	0.017032
PPP1R12A	0.22274	10.0587	102.878	5.63536e-19
OPTN	0.149422	9.89176	47.3054	3.10321e-07
ADCK1	-0.262637	9.84808	203.174	1.966e-20
CKB	-0.039784	10.1027	3.92979	0.0839174
PHKG2	-0.0235722	9.7984	5.51538	0.305592
TOMM20	-0.185945	9.9506	77.4477	3.06476e-12
PRAF2	-0.176076	9.79767	308.343	3.32172e-14
HK1	0.0756798	9.80118	49.1491	0.00126643
TRUB1	0.0534738	9.82764	10.5113	0.0559061
TALDO1	-0.520407	9.94257	659.909	2.4105e-90
LAMA4	-0.0216302	9.79302	6.75491	0.301823
CDC42SE2	-0.0406078	10.165	4.45929	0.060262
SUPT16H	0.063815	9.88488	9.21912	0.0280921
MRPL32	-0.242683	9.8132	312.011	3.77874e-20
SAP18	-0.197244	9.86416	102.783	4.97306e-12
VDAC2	-0.165343	9.87069	69.3436	7.39946e-09
SPCS1	-0.643063	9.85525	1286.11	2.16136e-121
RPS24	-0.143155	10.039	46.8515	3.77871e-09
PACSIN2	0.0232738	9.86387	1.30259	0.423907
AARS	0.0678135	9.93332	9.46376	0.0154258
CCDC186	0.0449225	9.87548	4.63053	0.122832
TIGD5	-0.0034915	9.78779	0.323619	0.846075
GREM2	-0.0355544	9.78231	96.6216	0.0100206
BORCS8	-0.128547	9.79582	187.748	1.10115e-08
CHGA	-0.0313925	9.78308	61.2146	0.0308636
SLC7A8	-0.114139	9.78488	508.434	1.2019e-11
GTF2A2	-0.187462	9.84607	105.754	4.63314e-11
AC245140.2	-0.0112735	9.78165	13.1031	0.375032
SCRN1	0.142044	9.87273	47.3176	1.33077e-06
PHF21A	0.231341	10.2218	147.436	2.24507e-27
OTUB1	-0.175068	9.81427	156.514	4.28185e-11
BORCS7	-0.109761	9.84192	37.6993	0.000119547
SYNGR1	-0.150538	9.8194	99.4687	2.91475e-08
RPS15A	-0.385538	9.89779	357.998	9.93078e-45
NUS1	-0.0172161	9.85162	0.807406	0.551612
LMAN2	-0.192206	9.83467	128.135	8.42305e-12
CA10	-0.108245	9.78604	344.914	8.36587e-10
GNAS	0.182851	10.0466	71.0248	4.06087e-13
SCAMP5	0.128445	9.85316	42.629	1.10286e-05
KIF1A	0.293962	9.9787	167.431	1.16714e-26
NR2F6	-0.0503142	9.79287	36.9434	0.0167713
RPL28	-0.407278	10.0915	454.441	9.96061e-76
NME3	-0.359827	9.8731	343.941	1.05891e-37
RPS2	-0.140017	10.0968	50.5144	8.63511e-10
SYNGR3	-0.0993375	9.78077	1203.42	6.41748e-15
ZNF385A	0.0403293	9.78575	64.2163	0.0116273
METTL9	-0.180419	9.83426	111.028	1.43588e-10
MCOLN1	-0.0714862	9.81287	27.2478	0.00664405
TSC1	0.240488	10.0261	118.472	2.06952e-20
TERF2IP	-0.0944914	9.98767	19.4729	0.000262242
ACTR2	0.0330569	9.91694	2.26257	0.242966
NLRP1	0.00642673	9.80953	0.245277	0.802506
PFN1	-0.313376	9.84558	303.791	1.10519e-28
FAM49A	-0.0172694	9.82413	1.13498	0.532205
C1QBP	-0.0934536	9.82917	32.5169	0.000837289
LDLR	0.201322	9.85607	98.2941	7.51236e-12
Z74021.1	-0.0102759	9.77924	37.1359	0.261581
TXNDC17	-0.138301	9.80037	164.307	7.23189e-09
KRT10	-0.34685	9.85803	341.386	9.0174e-35
ZFP82	-0.142486	9.85132	55.9938	6.5973e-07
TUBG1	-0.0354111	9.78677	37.846	0.0441244
SUV39H1	0.0356379	9.78255	109.309	0.00571444
CACYBP	0.549781	9.98018	537.074	1.42173e-83
PRMT1	-0.221372	9.84553	151.984	6.44947e-15
HDAC5	0.17425	9.94281	61.1594	5.57954e-10
TCEAL5	-0.0973798	9.7891	196.795	5.49098e-07
SEC62	-0.198168	10.0713	97.0658	1.64551e-17
MYDGF	-0.336035	9.82978	429.124	6.48752e-34
NAA10	-0.00562781	9.81836	0.144578	0.835159
FXYD6	0.03957	9.7887	38.0742	0.029296
ZNF470	0.00726768	9.81163	0.283949	0.780403
GAS7	-0.0352646	10.1267	2.96783	0.116582
METTL23	-0.0939038	9.82083	38.1092	0.000584608
ITM2B	-0.220895	10.1852	163.038	1.00726e-26
CES4A	-0.146917	9.90428	49.5681	1.62934e-07
IER3IP1	-0.126857	9.79461	198.749	8.81098e-09
RPL10	-0.313056	10.1497	288.129	8.10682e-50
GCA	-0.0558073	9.96446	6.78166	0.0365546
ST8SIA3	-0.251975	9.78624	1823.8	1.55756e-42
ABHD17A	-0.480565	9.87136	632.701	2.67681e-67
CHML	0.0138805	9.78457	9.22381	0.365263
LSM7	-0.115215	9.82787	50.3893	3.56753e-05
RPL36	-0.182977	10.0053	74.5736	3.00736e-13
DYRK1A	0.335879	10.2723	348.192	5.59506e-59
ILF3-AS1	-0.101643	9.86222	27.3138	0.000417527
ASNA1	-0.0857036	9.80589	49.4758	0.000645549
HSDL1	-0.0590428	9.81001	20.0892	0.0224632
IER2	0.0251041	9.79574	7.59432	0.250112
VSTM2B	-0.251	9.86815	154.964	9.51569e-19
COX7A2L	-0.118557	9.85932	37.1701	3.75397e-05
C19orf53	-0.33118	9.84695	336.04	6.96131e-32
TECR	-0.0624138	10.0161	8.64616	0.0132165
DDA1	-0.0830466	9.80432	49.7891	0.000802331
RPL18A	-0.179076	10.0285	73.5267	2.42165e-13
SYMPK	0.00593325	9.93315	0.0735493	0.830976
TMEM59L	-0.223539	9.81828	225.039	1.19109e-16
TRIM37	0.0584942	9.89398	7.03655	0.0429512
PPP1R37	-0.00347052	9.79074	0.223793	0.860322
ANKMY2	0.015187	9.8315	0.780967	0.590565
PNMA8A	0.000614536	9.79256	0.00588373	0.976195
PNMA8C	-0.0491967	9.78854	55.8897	0.00896701
TMEM160	-0.259283	9.82591	267.016	5.29208e-21
FTL	-0.293977	10.5137	600.024	9.9276e-80
C2orf68	-0.221557	9.89773	114.11	2.37807e-15
SIK3	-0.267449	10.88	1868.62	2.25847e-104
SLC17A7	0.0211352	9.77857	428.025	0.00103696
GTF2I	0.443622	10.2913	760.452	2.37332e-101
KLK7	0.00343252	9.7773	239.632	0.217022
TAPBP	-0.177455	9.85562	85.4892	5.54616e-10
PEA15	0.402274	9.91813	315.29	1.91902e-42
COX4I1	-0.502349	9.9207	602.241	4.44261e-80
SUPT7L	-0.0268553	9.81777	3.36893	0.319535
RPL9P9	-0.304683	9.81668	441.34	4.89387e-30
URI1	-0.146777	10.1381	52.7219	1.8815e-11
C1D	-0.123356	9.85056	43.03	1.70488e-05
WASH6P	-0.121177	9.79578	164.466	6.83893e-08
RPL39	-0.212424	9.94261	96.8357	2.28193e-15
COX7B	-0.24057	9.87419	144.536	2.16775e-17
SYN1	-0.131555	9.78715	451.606	1.13946e-12
SLC25A6	-0.216031	9.85737	131.305	3.61995e-14
ASB6	0.0101155	9.80112	0.868506	0.669769
FRRS1L	-0.169992	9.80861	169.338	3.8004e-11
DIRAS2	0.0115989	9.79105	2.39971	0.557518
RORB	0.205525	9.85453	95.3058	2.63333e-12
WASHC1	-0.062871	9.84732	11.8155	0.0287636
ENY2	-0.123082	9.87753	36.9451	1.7237e-05
PLGRKT	-0.37626	9.84656	413.379	5.90168e-41
NEFM	-0.314075	9.79196	1468.03	1.99981e-48
RHEB	0.167987	9.91075	56.3169	6.06106e-09
FAM3C	-0.0516357	9.85673	6.93464	0.0740161
RPS3AP26	-0.0311776	9.77913	339.592	0.000898791
RPS3AP25	-0.0252339	9.78428	29.9848	0.10502
BEX3	-0.323858	9.90404	245.285	5.41201e-32
APTR	0.123547	9.84901	40.6203	2.2033e-05
C7orf50	0.0248638	9.85012	1.69402	0.390773
PRKAR1B	-0.0783968	9.80091	50.9089	0.00104776
C6orf203	-0.0954858	9.81173	49.2102	0.000264799
HMGN3	-0.0945014	9.99876	19.6087	0.000219067
BEND6	-0.326644	9.82345	414.143	5.94652e-33
CUTA	-0.54718	9.86035	867.238	4.75288e-87
QRSL1	-0.0330788	9.8536	2.94888	0.252596
MCUR1	-0.136682	9.82277	76.4379	6.46342e-07
LYRM4	-0.0981848	9.9011	19.1919	0.000515903
ECI2	-0.0769868	9.81261	32.0467	0.00342095
AC140125.2	-0.0216763	9.77794	706.32	0.000845335
PDLIM7	-0.0700038	9.7806	677.947	9.9545e-09
KIAA1191	-0.0336669	9.80805	7.08187	0.186351
AC139491.1	-0.0264653	9.77828	603.169	0.000422595
LNPEP	0.166784	10.0321	57.1606	6.63088e-11
KIF2A	0.0418829	10.1395	4.51924	0.0619246
MAP9	-0.217298	9.8081	287.603	2.36471e-17
RPS3A	-0.264401	9.98766	156.241	1.58134e-25
CCNI	0.0901248	10.0347	17.105	0.000348853
PGRMC1	-0.45839	9.94491	510.997	7.39025e-70
TMEM165	-0.126793	10.7313	263.269	3.65589e-20
OPA1	0.278577	9.99303	143.688	6.94231e-25
PFN2	0.0544227	9.85673	7.6238	0.0617305
ATP1B3	0.120843	9.92344	27.9645	2.13637e-05
ZCCHC10	-0.0140135	9.82925	0.701742	0.617446
COX17	-0.209841	9.85022	127.462	1.77459e-13
ZNF786	-0.0176006	9.79948	2.79848	0.450562
PSMD6	-0.0412319	9.82726	6.54606	0.139329
SEC13	-0.113433	9.84129	39.9524	6.9125e-05
BRK1	-0.173618	9.84338	93.8818	1.04592e-09
CRELD1	0.0120645	9.82925	0.523526	0.667368
MLC1	0.163339	9.79856	282.612	1.18008e-13
CD99L2	-0.327342	9.93605	230.65	9.44212e-35
SNU13	-0.135121	9.84992	52.8453	2.40385e-06
UQCR10	-0.246331	9.86957	153.461	4.08625e-18
XBP1	-0.0649729	9.80483	29.9643	0.0089563
S100B	-0.585397	10.0438	894.257	8.60983e-146
PIGP	-0.122264	9.83496	49.7829	1.51145e-05
SLC13A3	-0.166022	9.92609	56.8147	1.4138e-09
RBM39	0.217844	10.2882	196.167	2.08272e-27
MAP1LC3A	-0.0128523	9.86868	0.400647	0.657791
CST3	-0.192028	9.99283	75.0555	4.12231e-14
MORF4L2	0.361068	10.0162	254.754	1.05338e-41
COPS7B	-0.136786	9.83999	60.2038	1.49276e-06
SRI	-0.135982	9.86422	47.9117	2.18533e-06
PPP2R2C	0.0389796	9.8778	3.31017	0.180078
MZT2A	-0.12073	9.82167	61.2575	1.03283e-05
HSPE1	0.463853	10.0321	394.535	5.70789e-68
MZT2B	-0.259675	9.86015	183.479	6.31183e-20
RMND5A	0.0507181	10.0379	5.59781	0.0423117
PPP3R1	-0.135262	9.80126	151.238	2.08139e-08
MAPKAPK5-AS1	-0.0850797	9.80872	43.734	0.000917924
ATP2B1-AS1	-0.106831	9.78465	466.556	1.24851e-10
SEZ6L2	-0.0909803	9.84074	25.2873	0.0014264
RND1	0.0191917	9.77956	125.964	0.0304698
RPL41	-0.138786	10.1656	54.6017	7.14254e-11
IGSF21	-0.102626	9.78879	224.696	1.05228e-07
MAGEH1	-0.538014	9.82825	1173.19	8.36648e-87
RPL5	-0.100025	10.0031	22.1156	8.36745e-05
SYT10	-0.0234988	9.77961	142.721	0.0198059
ST13	0.753229	10.1548	1148.22	9.38617e-206
EVL	0.025987	9.88023	1.44169	0.370455
SECISBP2L	0.00701551	10.2639	0.179031	0.723862
ENO2	-0.0986396	9.86459	24.7542	0.000616872
AC215219.1	-0.144266	9.84948	60.8992	4.6603e-07
APLP2	0.216526	9.96988	88.7093	3.30548e-15
MAOB	0.304912	9.81212	530.512	1.80089e-33
RPA3	-0.112136	9.79437	157.521	3.09781e-07
THY1	-0.54029	9.8	2550.95	3.69724e-112
ISY1	-0.0269805	9.79086	12.9366	0.176164
ATP1B1	-0.165724	10.4179	152.631	2.2153e-22
WIPF3	-0.171336	9.78877	608.848	2.44615e-18
CHORDC1	0.925457	10.2412	1729.08	0
HACD3	-0.0622228	9.92696	8.14139	0.0248871
COA5	-0.0292265	9.83301	2.97535	0.301339
PLEKHB1	-0.0510832	10.0173	6.04343	0.0426139
TMEM147	-0.362389	9.81876	611.931	2.288e-41
PEX16	-0.213795	9.81785	214.245	2.12359e-15
GSTP1	-0.373113	9.91648	328.226	2.40081e-43
AQP4	0.624006	9.95248	635.219	4.35625e-100
BDNF	-0.00944866	9.77896	40.4543	0.271029
2022-09-04	-0.605742	10.0562	1035.92	3.35109e-161
AC116533.1	-0.118338	9.7918	213.777	1.4412e-08
PSMB7	-0.0823633	9.91496	14.3742	0.00325623
PPCS	-0.0961403	9.80084	78.7062	5.94704e-05
ATP6V0D1	-0.0471642	9.85819	5.89479	0.102956
SYT1	0.190472	9.91956	70.0361	3.50182e-11
DCAF10	-0.0694508	9.82081	20.8233	0.0110028
DKK3	-0.543188	9.83247	1057.33	1.89271e-87
NUDC	0.416015	9.95988	328.419	2.26445e-48
EIF4A2	0.0291622	9.98275	1.823	0.270282
RPLP2	-0.218248	10.0258	111.097	3.69419e-19
CEND1	-0.136948	9.79392	241.913	3.50752e-10
INPP4A	0.188755	9.84464	97.8143	8.30498e-11
PRPSAP2	-0.0431336	9.92529	3.89697	0.121396
TRMT112	-0.134554	9.85321	51.3015	2.73347e-06
ADPRHL2	-0.111104	9.81679	58.8276	3.54561e-05
RPL34	-0.305598	10.0181	215.085	3.34064e-36
PLGLB1	-0.0103823	9.81205	0.585881	0.691461
SSU72	-0.0827218	9.88441	16.0912	0.00388621
SLC2A11	-0.0328791	9.80345	8.12678	0.178994
CHCHD5	-0.13008	9.79899	155.555	3.13184e-08
PSMB2	-0.16521	9.879	65.8653	6.74867e-09
SLU7	0.0515193	9.84922	7.52297	0.0756611
NCSTN	-0.13873	9.84945	57.1825	1.26913e-06
KIDINS220	0.23124	10.2618	191.695	2.92768e-29
CHD4	0.131229	9.98261	35.6674	9.89783e-07
CCNY	0.0455857	10.3379	8.10657	0.0150801
TBR1	0.00439502	9.77735	295.244	0.140922
SVBP	-0.169014	9.7932	389.023	5.76526e-15
SMIM20	-0.0810483	9.80845	39.8146	0.00155519
RPLP1	-0.249768	10.2156	201.766	6.84514e-36
GTF2IP12	0.0563508	9.84319	9.60462	0.0506966
DENND6B	-0.0326379	9.78427	49.775	0.0369375
NCL	0.0245459	9.94199	1.2679	0.373987
WASH2P	-0.0497692	9.80793	15.484	0.0507725
MTFR1L	-0.0631341	9.8057	27.3221	0.0117044
NT5DC1	-0.12214	10.158	38.9106	1.34975e-08
COL9A3	-0.542447	9.83496	1077.81	1.01244e-86
PSMA4	-0.0665486	9.846	13.2002	0.0204758
NACA	-0.0566002	10.0158	7.08892	0.0248009
C4orf48	-0.654643	9.96686	1064.11	7.14264e-155
TYROBP	-0.00368512	9.78768	0.37302	0.836999
SEC31A	0.170426	10.0174	57.7059	5.25606e-11
PLEKHB2	0.0755344	9.88514	12.79	0.00941256
RPL29	-0.278957	9.98402	176.26	4.13792e-28
GALNT18	0.201145	9.81696	179.944	4.07075e-14
ANAPC11	-0.181589	9.84675	99.1347	1.88265e-10
PHACTR3	0.157383	10.4458	120.89	2.77408e-19
ATP9A	0.1003	10.1482	26.2215	7.81243e-06
RPS3	-0.212175	10.0416	107.269	9.23194e-19
WASH7P	-0.238808	9.85983	155.285	4.90983e-17
GPN2	-0.0117066	9.80898	0.829009	0.647743
GUK1	-0.25286	9.90888	148.838	5.22851e-20
LDHA	-0.138505	9.81654	91.5779	2.44794e-07
NEDD4L	0.437574	10.0829	334.818	1.2105e-67
ACOT7	0.0781269	9.84488	17.2355	0.00691612
CLSTN1	0.116046	9.95009	26.6713	2.78797e-05
ATP1A2	0.312005	9.87149	206.638	1.05722e-25
PRKACB	0.0584183	10.3727	14.7312	0.00138449
VPS26B	-0.0115311	9.83961	0.418387	0.686912
RGS7	0.340544	9.90316	216.038	1.07096e-30
DDX20	-0.059866	9.78848	82.6569	0.00150566
POMP	-0.195133	9.8709	97.4513	7.75858e-12
MRPL12	-0.0821547	9.7874	177.063	7.60955e-06
STK25	-0.0644115	9.83174	14.6403	0.0222042
PPAN	-0.0541615	9.78307	181.86	0.000248236
SYT11	-0.208225	10.1694	138.069	3.56722e-23
MACROD2	-0.0252411	9.99141	1.29162	0.331796
TIMM10B	-0.124347	9.82479	63.8369	6.82597e-06
CA11	-0.116007	9.79144	219.965	2.09704e-08
COX6C	-0.366986	9.9105	309.581	1.85029e-41
AL445433.1	-0.00631439	9.77721	1031.77	0.0381686
C1orf61	-0.22671	9.90624	112.434	3.13215e-16
LGALS8	-0.0234629	9.80621	3.68673	0.34956
RAN	-0.120176	9.85086	41.2717	2.8149e-05
MFN2	0.0291113	9.8425	2.55692	0.311686
PCDH9	-0.156471	11.2455	833.468	3.37692e-52
LINGO1	0.578671	10.1749	707.549	9.64498e-134
CREM	0.00651936	9.86984	0.0955996	0.822451
KCNJ6	0.0121964	9.78196	14.2699	0.335488
EIF4G3	0.0412948	10.4844	11.4184	0.0135599
ARF1	-0.109244	9.91407	26.4612	9.16695e-05
RPL24	-0.257492	9.99976	151.536	6.92071e-25
HPCA	-0.964596	9.80137	9166.49	0
CIRBP	-0.288065	10.0186	197.99	3.02762e-32
MYO10	0.203583	9.93827	80.3576	6.52507e-13
MDH1	-0.440343	9.84418	625.245	4.02851e-56
HMGB1	0.359886	10.3809	588.281	9.80061e-80
C6orf106	0.0243857	9.87448	1.36305	0.401521
FO538757.1	-0.0189126	9.79298	5.33776	0.36585
GDI1	0.0807912	9.91433	14.0294	0.00462643
SLAIN1	-0.01353	10.6715	2.06331	0.353599
SLITRK5	-0.114246	9.864	31.7308	7.15759e-05
CDC16	0.135041	9.93022	37.468	1.83132e-06
CAMK2B	-0.369252	9.80163	1050.6	1.20288e-51
ASCC1	0.120966	9.98961	28.2047	5.33297e-06
NDRG2	0.0456289	10.201	6.2759	0.0309857
EAPP	0.0956281	9.89567	19.6479	0.000966001
RPL36AL	-0.0801704	9.88678	14.8225	0.00509015
RAB15	-0.0327168	9.78144	111.681	0.0105009
GPI	0.143705	9.95192	39.0498	2.21062e-07
SMARCD3	-0.06782	9.80064	38.8129	0.00441369
PCNX1	0.299466	10.1806	233.728	9.78991e-41
CABP1	-0.0171812	9.78157	30.1421	0.176362
FASN	-0.0202495	9.81899	1.87238	0.455305
SLC48A1	-0.734403	10.1403	1769.24	4.165e-292
APBA2	-0.0951975	9.93292	18.2936	0.000528002
RAB11A	-0.0270532	9.84961	2.06527	0.348642
GOLGA8A	0.020579	9.83083	1.46656	0.465337
SRSF8	-0.188362	9.82758	137.33	1.17853e-11
MAP1A	-0.0364352	9.95168	2.72373	0.179256
PCBP2	0.0818929	9.98465	14.3781	0.00206655
SERF2	-0.251592	9.98534	142.875	4.41436e-23
NBR1	0.0437819	9.93277	4.00132	0.116995
SCG3	-0.33409	9.79639	1154.68	1.33608e-47
SLC8A1-AS1	-0.00338159	9.7912	0.200219	0.865489
RTL10	-0.0291093	9.79607	9.66173	0.190286
ARPP19	-0.273275	9.98483	169.241	4.71886e-27
RNF135	-0.0693787	9.79028	88.8133	0.000491658
COX5A	-0.232772	9.83532	185.207	1.18073e-16
MBTPS1	0.132477	9.94005	35.5809	2.28712e-06
TSPAN3	-0.0625666	9.8944	8.82581	0.0282944
SH3GL3	-0.146109	10.6302	172.044	2.28937e-23
OCIAD1	-0.0690809	10.0136	10.7129	0.00619175
MESP1	-0.00604429	9.78366	2.08433	0.682496
SEC14L1	-0.00597391	9.9374	0.0714353	0.82882
SFT2D1	-0.310156	9.92947	224.554	7.80846e-31
HCFC1R1	-0.139717	9.81801	89.2415	2.28253e-07
EIF1AX	0.337684	9.96457	219.079	2.34207e-33
HES6	-0.0878733	9.8123	41.5672	0.000819465
TCF25	0.403161	10.0663	343.994	2.19179e-56
YPEL3	0.062718	9.96197	8.27196	0.0209874
NDUFAF2	-0.0140567	10.0048	0.356739	0.584019
ATP1B2	0.0262821	9.86286	1.62095	0.366607
HNRNPL	-0.14304	9.98234	45.4779	3.2485e-08
COPRS	-0.109304	9.82236	49.6061	6.81565e-05
UROD	-0.111458	9.79675	132.775	9.73523e-07
DHX36	-0.0241924	9.96746	1.17425	0.365152
KRT222	-0.0415746	9.77811	1771.06	1.64994e-08
PSMD8	-0.345553	9.86702	325.28	1.21835e-34
USP39	-0.123796	9.83747	50.197	1.26842e-05
IFIT1	-0.0811551	9.80205	53.1865	0.000808941
ADAM11	-0.00624387	9.78091	5.40078	0.593001
RAB40B	0.101207	10.174	28.8137	3.74565e-06
CHCHD10	-0.196219	9.81321	198.16	1.08282e-13
TBCB	-0.255833	9.92786	150.907	3.53035e-21
CTXN1	-0.411076	9.79251	2412.57	2.42535e-79
MRPL34	-0.128575	9.80707	106.209	4.17355e-07
AC074033.1	0	9.77703	0	1
U2AF1L4	-0.0594657	9.79754	36.0654	0.00927537
NUMBL	0.0239986	9.79646	6.49252	0.277827
ATP1A3	-0.216645	9.78835	1008.13	1.58402e-28
SNRPD2	-0.209122	9.82927	162.272	5.91083e-14
MCRS1	-0.155844	9.8056	163.513	5.72517e-10
HS6ST3	0.0448377	9.82222	8.01677	0.102621
ATP6V1D	-0.151718	9.84949	66.8636	1.13925e-07
FAM213A	0.175632	9.83011	107.979	4.67105e-10
TFPT	0.0175656	9.80327	2.32519	0.4695
GHITM	-0.083138	9.83666	22.9522	0.00340338
SMARCB1	0.00770265	9.85432	0.161363	0.790578
DTNB	0.0545989	10.1336	7.02916	0.0157608
FUNDC2	-0.110804	9.82727	46.8444	6.86741e-05
LINC01278	-0.152725	9.89719	47.1932	6.08014e-08
ATP6AP2	-0.172958	9.89059	71.7043	9.52974e-10
GPM6B	-0.172864	10.8657	681.499	9.64531e-43
TMEM141	-0.168126	9.79983	250.98	1.67295e-12
OLFM1	-0.0579121	9.78484	134.368	0.000402435
RPL7A	-0.248839	10.0274	146.749	1.07025e-24
TUSC1	-0.166243	9.80011	241.406	3.41395e-12
ZNF7	-0.084697	9.81921	32.0498	0.00180727
BAALC	0.0310637	9.87404	2.17153	0.285548
C8orf37	0.0406411	9.78402	95.6947	0.00476691
C8orf59	0.0408492	9.84075	5.34798	0.155024
RPL7	-0.147566	9.95003	47.3273	3.68426e-08
PSD3	-0.126008	10.3275	60.6676	7.98411e-12
MICU3	-0.16036	9.98389	53.0119	4.91445e-10
NDUFB2	-0.384221	9.91757	342.727	4.51441e-46
AKR1B1	0.0276654	9.82055	3.33517	0.310694
ZC3HC1	-0.107541	9.80881	67.7658	2.86805e-05
PSIP1	0.158849	10.1403	64.4245	3.30586e-12
VGF	-0.0140879	9.78562	6.85724	0.394472
PPP1R9A	0.169355	10.2555	83.0784	1.4938e-16
LIMK1	-0.0299015	9.79075	16.14	0.133151
2022-09-07	-0.224548	10.7878	1163.03	9.24023e-66
RPL21P75	-0.020932	9.77858	267.218	0.00950705
PHF14	0.0603215	10.1633	9.07723	0.00605573
SASH1	0.26236	10.3479	263.084	2.48368e-42
CDC40	-0.0930551	9.95051	17.9958	0.000560521
MAP3K7	0.202367	9.98144	80.8242	8.20068e-14
FIS1	-0.50118	9.96869	621.59	1.24616e-88
TBCC	-0.12813	9.79296	232.836	2.17762e-09
RUFY1	0.133822	9.91193	36.8611	3.25512e-06
PJA2	0.0754114	10.1045	13.7818	0.00124605
COX7C	-0.319153	9.93835	227.304	3.26319e-33
SKAP2	-0.0143086	9.81739	0.894222	0.595143
RPL37	-0.220422	10.0346	113.952	7.07359e-20
SPARCL1	0.331259	10.033	197.914	7.19101e-37
HOPX	-0.0648142	9.78276	269.827	8.95517e-06
PAICS	0.00859004	9.88033	0.16748	0.766787
SST	-0.220346	9.80086	389.397	7.41865e-20
ZBTB38	0.0175495	10.0392	0.650516	0.479683
C3orf18	-0.0337106	9.78314	70.4452	0.021181
HMGB1P5	-0.179406	9.83282	113.172	1.65231e-10
RBMX	-0.0543112	10.0806	7.03874	0.0208802
INPP5J	-0.00570379	9.77863	20.9547	0.463731
UFD1	-0.0712631	9.85043	14.5791	0.0133162
SH3BGR	0.120241	9.85839	35.4236	4.02154e-05
CSE1L	0.0632846	9.95642	8.18653	0.0205961
YWHAB	-0.16481	9.96525	58.2863	3.70547e-10
COMMD7	-0.192074	9.80283	279.605	5.67296e-15
ABHD12	0.190257	9.97492	70.4639	2.88712e-12
PAK5	0.22345	9.87206	109.699	4.1606e-14
ILKAP	0.156186	10.0093	50.753	2.31219e-09
C2orf80	-0.0472683	9.77987	462.182	1.43646e-05
FAM171B	-0.0678161	10.0332	9.78798	0.00603832
DHFR2	-0.1644	9.7954	311.262	2.42422e-13
HSP90AA2P	0.130864	9.7951	235.128	3.06042e-10
PPP2R5E	0.0942826	10.0385	17.1388	0.000174148
CCM2	-0.198908	9.91787	81.7483	5.1212e-13
RAB27B	-0.00760221	9.77947	17.4855	0.423463
TRAPPC6B	0.0222633	9.86555	1.2399	0.444265
ERH	-0.141302	9.87596	49.56	7.83437e-07
AC016739.1	-0.0815389	9.78589	213.416	2.59693e-06
RSRC2	0.262867	9.98641	140.127	3.91729e-22
ST6GALNAC5	-0.291754	9.78898	1606.39	9.01731e-48
UNC80	-0.268896	9.79337	923.951	1.67446e-34
KCNG1	0.0015192	9.77894	1.14314	0.853452
KCTD10	-0.00312804	9.80511	0.0693911	0.899605
COX6B1	-0.310661	9.89253	230.409	5.99038e-29
STMN3	-0.0547777	9.80565	20.2942	0.0285648
DAAM1	0.269261	9.93415	130.467	5.52958e-21
LINC01821	-0.010476	9.77782	229.18	0.0713026
TUBA1A	-0.630152	10.2646	1672.13	7.07607e-266
RPL13AP20	-0.00246616	9.77811	7.86574	0.69947
ZFYVE21	-0.108184	9.82624	45.2958	9.74919e-05
CPNE9	0.0114627	9.78538	5.21294	0.475296
MFSD6	-0.189293	10.0272	79.8933	9.92318e-15
PRKCA	0.399914	10.2439	395.732	2.19645e-77
CCNQ	0.296155	9.84695	252.128	4.44888e-24
SMAP1	-0.131798	9.93272	34.1066	1.44465e-06
GABARAPL1	-0.0885651	9.86136	21.0614	0.0021308
SPRYD7	-0.0154124	9.86191	0.615523	0.595239
CIR1	-0.151328	9.94782	47.1418	1.75106e-08
PGM2L1	0.154586	9.80658	153.752	3.5405e-10
MRPS21	-0.148621	9.83099	78.8224	1.13503e-07
CPNE4	0.128253	9.80577	115.902	1.73607e-07
PRR13	-0.0643125	9.80641	27.4947	0.0106962
OXCT1	-0.185733	9.85877	86.1687	8.32727e-11
CHP1	-0.0497284	9.86437	6.18381	0.0856244
NAP1L1	0.0623533	10.0881	8.97651	0.00855942
FKBP2	-0.406378	9.89581	399.908	1.48781e-49
CDC123	-0.063324	9.8489	11.4361	0.0277947
SELENOH	-0.0441732	9.79404	26.2888	0.039949
TMCO1	-0.228348	9.86824	132.309	1.00785e-15
TMED2	-0.19987	9.86688	105.377	2.49083e-12
PAK1	-0.407553	9.92503	338.822	1.12889e-52
SLC7A10	-0.0105041	9.77863	69.27	0.184667
WAC-AS1	-0.146716	9.82418	85.9203	1.03103e-07
MRPS36	-0.103745	9.83645	35.3233	0.000252506
SLC1A2	0.378595	9.94582	246.629	1.07209e-39
POGZ	0.074403	10.2761	20.995	0.000178069
RPL15	-0.242403	10.0657	145.963	2.03879e-25
CAPN1	-0.0228292	9.79173	8.50712	0.262005
RGS4	-0.177935	9.78167	2654.81	2.3772e-35
NUDCD3	-0.0278396	10.0306	1.61995	0.263679
JAZF1	-0.17682	10.0584	63.4403	7.93717e-14
PHPT1	-0.256472	9.83992	212.413	9.56395e-20
THAP6	-0.156322	9.88398	57.0564	3.89716e-08
LAMTOR5	-0.267119	9.8348	248.401	1.50754e-21
CNPY3	-0.12008	9.80486	102.318	1.48951e-06
PVALB	-0.0118516	9.77761	490.463	0.0211051
FAS	0.0291606	9.78007	220.682	0.00207452
INPPL1	0.0428153	9.79401	25.9678	0.0413779
AK5	-0.0433952	10.4033	8.1151	0.0134225
CCND2	0.0480317	9.79087	43.4249	0.0131879
ATP1A1	-0.00740873	9.95278	0.110486	0.78529
HAX1	-0.292034	9.82581	344.364	2.66801e-26
CAMSAP2	0.381608	10.1541	339.228	1.93257e-60
DNAJC5	0.144784	9.88503	45.8617	7.64208e-07
PTGES2	-0.118556	9.79803	139.114	3.18163e-07
NDUFAF5	-0.0244744	9.82709	2.25803	0.380198
NAXE	-0.237805	9.80679	365.446	8.34999e-21
SNRPD1	-0.176748	9.83693	103.623	3.94371e-10
SH3D19	-0.199669	10.3257	149.422	7.3364e-28
KDM1A	-0.0361665	9.80929	7.88772	0.159597
MED9	0.0426773	9.7997	16.8524	0.0653456
BAP1	-0.0632769	9.8384	13.0354	0.0263333
KIF5B	0.153823	9.99734	47.7961	6.23169e-09
CAMTA1	0.119342	10.3308	52.5557	3.99559e-10
FBXO33	0.187874	9.85994	84.2631	1.73666e-10
ARHGEF2	-0.231959	9.98509	124.03	9.3336e-20
SERBP1	0.186107	9.97307	70.5579	9.02818e-12
LAPTM4A	-0.106142	9.84704	33.6635	0.000212885
B4GAT1	-0.218043	9.82276	198.502	1.72188e-15
PREX1	0.0703842	10.3638	22.1922	0.000134254
MBOAT2	0.60567	10.2505	926.123	5.09193e-166
EIF2B3	0.0321955	9.91385	2.05963	0.256696
MARK1	-0.356206	9.84336	366.969	6.85863e-37
TMEM242	-0.112599	9.8342	43.4796	6.66285e-05
GDF10	0.0290924	9.7794	369.895	0.000332908
GRIN2B	0.0402448	9.81608	7.52822	0.132054
MAPK1	0.0971427	10.0552	20.1571	8.27651e-05
SRCIN1	-0.303286	10.1693	272.031	1.55682e-48
CUEDC2	-0.296494	9.83928	290.48	5.15678e-26
CTSD	-0.0673702	9.96095	9.58652	0.0118038
MEAF6	-0.120614	9.87268	36.3684	2.63728e-05
CDC42BPA	0.0666137	10.5998	44.4153	1.6895e-05
RPL13	-0.10919	10.214	38.52	8.90706e-08
UBE2D4	-0.114451	9.8061	85.9809	5.58425e-06
EIF5A	-0.033143	9.86953	2.71833	0.252339
HNRNPU	0.354156	10.2984	464.883	6.80827e-68
KLC1	-0.0206066	9.95952	0.908822	0.444583
PLIN3	0.117727	9.83152	48.8434	3.16639e-05
COQ10B	-0.0259881	9.82658	2.57779	0.350736
NUDT14	-0.0390977	9.78261	109.606	0.00574903
ST8SIA1	-0.0518903	9.81178	13.8946	0.0472618
COPS2	0.0193819	9.9622	0.777301	0.473097
RPL30	0.0202232	9.86927	1.02154	0.486914
TLK1	0.494519	9.93412	419.241	1.69744e-63
GNA15	-0.0135352	9.7796	51.5137	0.169461
FIBP	-0.303882	9.81996	414.774	3.04434e-29
RNASEH1	-0.0346042	9.80878	7.36104	0.176765
NOP53	-0.145999	9.84083	68.0916	2.82923e-07
B2M	0.0208054	10.1889	1.17052	0.328863
HERC1	0.221614	10.1727	132.764	2.99808e-23
MAP2	0.401906	9.9395	283.681	8.47918e-44
DERL2	-0.101422	9.84046	32.6431	0.000372856
KCTD13	-0.0331648	9.81679	5.2858	0.216923
UBL7	-0.021522	9.79858	4.53419	0.350667
IRF2BP1	0.00105	9.79663	0.0123905	0.96243
C9orf16	-0.1517	9.80588	152.708	1.73426e-09
NARFL	-0.00690499	9.80331	0.364731	0.776886
KEAP1	-0.0484793	9.84133	7.37036	0.0902397
MYL12B	-0.25155	9.85306	181.377	8.69773e-19
UBALD1	0.0142508	9.81577	0.985026	0.593477
TBRG1	-0.0946413	9.85694	24.3304	0.00101873
UQCRC2	0.00310877	9.90756	0.0209747	0.912946
PHKB	-0.00524686	10.0512	0.0572233	0.829945
SPIRE2	0.0636162	9.80475	28.6409	0.00946921
C17orf100	-0.056146	9.78026	522.798	1.26107e-06
HLF	-0.0511451	9.79397	33.5782	0.017396
TEX2	0.028095	9.91345	1.6247	0.322208
SCRG1	0.477951	9.94125	419.922	2.42865e-60
NRBP1	0.0720594	9.86056	13.3736	0.0135998
OAZ2	-0.0913389	9.90975	18.4215	0.00114896
SNAI2	-0.00516495	9.77719	888.845	0.066617
CYCS	-0.205884	9.83741	141.424	2.96428e-13
TNRC6C	0.314662	10.3379	407.331	3.19696e-58
RPL6P27	-0.245754	9.79434	727.213	2.43969e-28
PCYT2	-0.174204	9.80487	211.54	3.29824e-12
TFG	0.012978	9.89181	0.37478	0.652274
ZNF446	-0.00816655	9.78855	1.59055	0.659133
STX1B	-0.126347	9.78936	315.674	1.51176e-10
RPS15	-0.239341	10.1127	155.089	3.07099e-27
NDUFA3	-0.383642	9.86871	386.857	1.1969e-42
ELP6	-0.140974	9.81292	104.844	8.97755e-08
GRHPR	-0.255168	9.89361	159.303	7.2074e-20
PHYHIP	-0.492651	9.79783	2354.61	1.32981e-97
DHPS	-0.113182	9.83036	47.0964	5.39423e-05
MED29	-0.0889512	9.82246	33.2048	0.00120116
RPS19	-0.119274	10.0893	35.4043	2.36415e-07
DBP	-0.0529788	9.79181	45.5974	0.0100066
RPS9	-0.243221	10.0522	146.701	6.95377e-25
PIH1D1	-0.110985	9.83089	44.6881	7.66028e-05
TMEM18	-0.248974	9.79857	583.814	4.89151e-26
AKAP12	-0.0984114	9.80065	79.8335	3.82402e-05
SYNJ2BP	-0.0795865	9.80503	43.7179	0.0014093
CFDP1	0.00622851	10.0139	0.0732655	0.806923
LARP1	0.258198	10.0502	138.791	2.62853e-24
PPP1R21	-0.196141	10.1961	119.028	1.09603e-21
CFAP36	0.177712	9.87709	70.1546	1.5847e-09
CHCHD6	-0.192377	9.8545	96.6533	1.65021e-11
MRPL4	-0.00780347	9.79407	0.822736	0.714473
PDHA1	0.0117097	9.82344	0.566646	0.671261
PRPF4	0.0515349	9.80638	17.861	0.0388341
TMEM246	-0.124639	9.82743	58.736	7.52615e-06
CBWD5	0.191714	9.94814	71.7543	7.65964e-12
TTC39B	-0.0450655	9.7988	18.4977	0.0522035
TUBB4B	0.000539748	9.81005	0.00170797	0.983294
SMIM19	-0.263204	9.80899	406.703	1.8764e-24
IGBP1	-0.109461	9.83816	38.18	0.000116535
FBXO25	0.0947861	9.90383	19.0219	0.00100239
ACHE	-0.0431798	9.78263	128.822	0.00240833
COL26A1	-0.055138	9.79211	46.524	0.00778663
GTPBP10	0.0253527	9.90344	1.37959	0.375477
CROT	0.0647586	9.82754	15.0446	0.0205812
CACNA2D1	-0.0297788	10.3943	3.95655	0.0926613
DNAJC30	-0.127912	9.79205	250.891	1.17404e-09
HDDC2	-0.248785	9.81474	309.209	8.05099e-21
FUT9	0.201566	10.2065	97.644	8.41966e-21
COX7A2	-0.421768	9.89199	441.014	4.43177e-53
ENPP4	-0.380371	9.89008	365.187	5.25854e-43
KLHDC3	-0.0508628	9.82257	10.7929	0.0643023
OARD1	-0.128	9.83606	55.5752	6.07353e-06
PHF20L1	0.161122	10.0409	54.3425	1.86859e-10
TTC1	0.25474	10.1263	145.322	1.83077e-27
AC008608.2	-0.0326244	9.78012	200.314	0.00312178
SKP1	-0.0792546	10.0214	14.2412	0.00151465
MCTP1	-0.322956	9.81017	580.754	1.49672e-35
IFT22	-0.0733649	9.7855	189.147	1.58356e-05
NDUFA5	-0.101437	9.87097	25.0429	0.000421392
MSL3	0.0469439	9.80509	15.8711	0.0569073
NDUFS6	-0.2895	9.86526	223.543	1.53263e-24
FRG1	-0.179656	9.87376	81.0151	3.02175e-10
HSPA4L	1.22288	9.9847	1926.06	0
SOBP	0.213964	10.1015	91.5097	3.60847e-19
AC004057.1	-0.0761833	9.78124	595.118	5.72218e-09
PPA2	0.138492	10.1496	45.474	7.94521e-10
PLPP6	-0.0298237	9.78132	98.8741	0.0179867
PPP3CA	-0.0930473	10.1996	23.8871	7.27633e-06
TSC22D3	0.0549413	9.95733	5.94783	0.0440043
UBE2K	0.218464	10.1836	122.169	4.24317e-23
LDB2	-0.0042387	9.84276	0.047198	0.882668
AC093323.1	-0.0381216	9.79339	20.7075	0.0721223
VLDLR	-0.306674	9.81392	490.709	4.41405e-31
TAGLN3	-0.247023	9.78952	1139.61	3.22695e-34
CBWD3	0.142999	9.95336	40.572	2.42586e-07
FAM107A	0.666657	9.86711	955.055	8.59279e-108
CAMKV	-0.292504	9.78768	2008.45	2.41823e-51
INIP	-0.0854415	9.91175	15.4328	0.00232918
GPX1	-0.0865575	9.80686	47.9999	0.00062889
RUFY3	0.356905	10.2575	419.147	2.64235e-64
FBXL2	-0.130225	9.80108	135.122	6.35375e-08
USF3	0.0869958	9.87074	17.7857	0.002937
RANBP1	-0.220944	9.82517	198.953	1.11304e-15
SUMO3	-0.112258	9.802	100.327	3.76442e-06
C21orf33	-0.0625546	9.85551	10.8804	0.030253
CHMP4B	-0.0338686	9.85183	3.1968	0.241044
CRNKL1	0.0535749	9.84409	8.65404	0.0634418
SNAP25	-0.645123	9.81864	1927.6	3.31126e-131
MRPS26	-0.0788603	9.84289	19.4191	0.00585014
TRIP12	0.109563	10.1882	33.2353	4.01063e-07
RPL10P6	-0.00557364	9.77769	94.2927	0.282106
SRPK2	0.0286117	10.5202	6.49627	0.0786013
C4orf3	-0.0868559	9.82051	33.1376	0.00145314
ACOT13	0.0910293	9.84365	24.2746	0.00163601
EBPL	-0.114922	9.79704	136.015	5.01059e-07
APLP1	-0.328734	10.3096	454.709	2.5633e-73
BRD3	0.022201	9.83625	1.61587	0.436053
KATNAL1	0.0223913	9.96046	0.934842	0.408237
RPS2P5	0.00539579	9.78071	4.64863	0.629032
CRYM	-0.211767	9.78319	2371.91	5.18035e-40
AKT1S1	-0.00338877	9.81128	0.0642457	0.896402
ROGDI	-0.620099	9.84021	1356.72	3.43081e-113
NAB2	0.0503808	9.78746	75.5763	0.00336249
JPT1	-0.0562489	9.79669	33.6238	0.012651
SPRYD3	-0.0504735	9.81167	14.0651	0.0534697
OBSL1	0.041313	9.78931	39.1591	0.0257109
PSMC4	-0.189213	9.82494	144.512	6.9749e-12
PTMS	0.00301555	9.82746	0.0329354	0.914038
KCTD6	0.0353761	9.84923	3.51929	0.222082
HPCAL4	-0.0499429	9.78355	135.321	0.00100849
LONRF2	-0.0525249	9.8323	8.95111	0.0626208
PAK3	-0.166784	9.79233	390.328	4.62706e-15
NTM	-0.307063	10.4265	414.915	9.27523e-77
GGNBP2	-0.00412249	9.90748	0.0366182	0.884676
ARRDC2	0.283618	9.87611	184.426	1.33146e-21
LPCAT4	-0.0555928	9.79603	35.3193	0.0127436
PAFAH1B2	-0.0266022	9.96883	1.51035	0.318484
PEX11B	-0.124256	9.80632	101.133	8.65479e-07
AAMDC	0.0145303	9.83987	0.653957	0.61211
PARK7	-0.247937	9.90841	141.081	2.91313e-19
IDH3B	-0.0470178	9.81139	12.3578	0.0715201
TMEM9	-0.126098	9.81144	88.0075	1.41726e-06
PTPN11	0.280128	10.0987	167.364	5.88431e-31
PTPN20	-0.016234	9.78294	17.4846	0.253114
S100A13	-0.245784	9.8235	244.895	3.14762e-19
NAPRT	-0.0249331	9.78012	119.333	0.0222182
DICER1	0.167971	10.3523	130.65	6.01362e-19
PCDH17	0.0400134	10.023	3.18454	0.114497
MAGI2-AS3	0.107049	10.0851	27.1779	7.80034e-06
DANCR	-0.0812188	9.85087	18.6236	0.00476778
RPL26	-0.661724	9.868	1207.71	5.16471e-130
RAB18	0.117342	9.91247	28.4162	4.31174e-05
RPS26	-0.568394	9.91175	791.808	1.28578e-101
M6PR	-0.0575466	9.82045	14.6426	0.0349106
RAB3A	-0.0528362	9.7851	109.337	0.00138441
ODF2L	-0.014082	9.93861	0.39196	0.609579
FNDC10	-0.0202463	9.77799	563.626	0.00221998
MALSU1	0.125492	9.86413	39.9225	1.88986e-05
RPL3P4	-0.471394	9.80142	1760.54	1.97295e-83
TM7SF2	-0.432765	9.80522	1301.93	1.57714e-66
SH2D3C	0.00372586	9.78188	1.38093	0.769718
B3GNT4	-0.00893747	9.77747	458.823	0.0463845
2022-03-02	0.00998876	9.78178	10.2722	0.423963
SLC22A17	0.00461962	10.0379	0.0495192	0.852347
FJX1	-0.0193865	9.77957	101.348	0.0508429
CCP110	0.312581	10.3056	351.106	1.31397e-54
TMEM74B	-0.113295	9.77978	2533.41	6.17006e-23
CBWD1	0.126731	9.92662	32.655	7.92805e-06
CADM3	-0.133177	9.78391	817.601	1.91348e-16
TUBB	-0.134666	9.83251	64.5793	1.67765e-06
POLR2L	-0.300512	9.8242	364.334	5.59617e-28
NDUFB9	-0.311653	9.83296	346.649	4.8587e-29
TMEM258	-0.759499	9.91842	1498.41	1.96749e-190
OTUD6B-AS1	-0.147015	9.87591	53.2305	2.71898e-07
TMEM54	0.0507046	9.79601	30.8222	0.0199677
SPIN1	0.0198155	10.1138	0.935741	0.387999
ANO6	-0.216175	9.81635	210.442	6.97128e-16
LYRM1	-0.0863679	9.81417	37.5923	0.00113219
SCCPDH	0.502028	9.87125	571.767	2.36096e-62
VPS35	-0.0815265	9.87839	15.9293	0.00456055
TTC19	0.215331	9.98078	90.6512	2.25384e-15
ECE1	0.228591	9.90189	104.192	5.58071e-15
CCDC85B	-0.306717	9.8352	325.372	5.33254e-28
PDCD5	-0.176002	9.84721	92.657	6.8118e-10
C1QTNF4	-0.388999	9.79458	1810.85	7.27338e-67
SNCG	-0.151603	9.78315	1247.43	3.49649e-22
MAST3	-0.529504	9.94332	678.065	7.99817e-94
MED4	0.0233805	9.88302	1.23294	0.419665
ACSL1	0.0369528	9.96649	2.83813	0.170377
HIVEP1	0.0461261	9.90738	4.0431	0.106573
CEP170B	-0.0339321	9.78315	70.9472	0.0204383
SUMO1	-0.13109	9.87729	41.8416	4.63508e-06
SCN1B	0.0670469	9.82993	16.2926	0.0172441
CCDC88B	0.0581102	9.78721	106.564	0.000581364
ACTR6	-0.105736	9.82205	47.5596	0.000115157
LY6H	-0.124066	9.78617	465.281	3.32854e-12
ATN1	0.154728	9.86479	58.7785	1.42495e-07
SLC6A17	-0.0303516	9.77993	189.777	0.00463681
MALAT1	-0.162268	11.5711	1690.3	3.76875e-76
HP1BP3	0.164338	10.4051	145.213	1.11608e-19
B3GAT3	0.0663426	9.8607	11.4471	0.0230364
COPE	-0.25107	9.86926	165.383	9.04822e-19
DAD1	-0.436546	9.92655	451.545	9.27664e-61
EIF5	0.450344	10.0604	418.789	3.55951e-68
NARS	0.0949679	9.90367	19.7081	0.000981769
RPS28	-0.243081	10.1218	156.402	1.41327e-28
BABAM2	0.173425	9.96582	52.2005	2.63794e-10
FEZ1	-0.478822	10.218	846.622	4.02568e-136
UBA52	-0.227558	9.95392	114.192	7.21967e-18
GNAO1	-0.124678	10.4627	85.5919	5.14805e-14
OSBPL8	0.325205	10.0754	204.668	8.4844e-39
COPS3	-0.16922	9.84676	85.9202	3.00449e-09
RPL23A	-0.569947	9.87601	858.398	4.33074e-96
MAP2K6	0.0274498	9.87147	1.69154	0.345464
KPTN	0.0122757	9.79565	1.81845	0.574467
SRM	-0.203858	9.80724	262.042	1.25826e-15
DYNLL2	0.0381697	9.86749	3.62733	0.190224
SV2B	-0.139596	9.88221	39.4916	9.87499e-07
CLASP1	0.29446	10.4083	438.302	2.04338e-57
CAMK2A	-0.0702522	9.78874	106.425	0.000231866
MRPL13	-0.0895968	9.82221	32.8061	0.00109513
ANKRD12	0.366076	10.1339	307.089	6.21329e-54
MLLT1	0.118002	9.8565	36.5675	5.49294e-05
ARL8B	0.0803599	9.9816	13.0911	0.00258251
MAGED4B	-0.059043	9.78334	198.227	9.1207e-05
MAPRE3	-0.0615373	9.82683	14.7854	0.0271043
MAGED4	-0.102253	9.79251	152.593	1.29123e-06
LINC00599	-0.0802082	9.78245	442.905	2.80355e-08
CBWD2	0.179549	9.96491	63.4781	6.55263e-11
SBDS	-0.0884778	9.93044	17.3593	0.00132484
WBP4	0.0598002	9.90684	7.49298	0.0367765
ILF3	0.0853572	9.91469	15.3355	0.00277722
BABAM1	-0.122285	9.80216	118.712	5.03507e-07
AC021016.2	0.00435223	9.77822	22.7262	0.496695
PTCHD4	-0.0335858	9.78099	137.825	0.00611558
JUND	-0.294823	10.0395	213.701	2.65753e-35
GCC2	0.0322011	9.97785	2.01832	0.226196
UQCRFS1	-0.225907	9.82321	211.565	1.74043e-16
FAM105A	-0.0568716	9.78378	169.903	0.000236185
PPP5C	0.075979	9.8341	19.3834	0.00754455
FGD4	0.36721	9.92894	229.225	1.69761e-36
ZNF76	-0.178222	9.82561	125.047	1.14917e-10
FAM216A	0.0390714	9.82969	5.46599	0.164725
BCL11A	0.0821166	9.81512	30.4837	0.00196756
TEX261	-0.094755	9.80336	67.0742	0.000115317
NUAK1	-0.0113201	9.89939	0.273175	0.692012
ANKRD39	-0.0350963	9.81177	6.77676	0.179398
MRPS9	-0.103617	9.90787	22.3585	0.000226591
CCDC74A	0.00241093	9.77968	1.59803	0.801989
RNF181	-0.267685	9.80206	562.675	7.87195e-28
CCDC74B	0.0126952	9.77846	155.052	0.0565492
ZNF275	0.0623199	9.79689	44.0354	0.00473754
ENOX2	-0.109099	10.0904	24.0446	2.28995e-06
NKAP	-0.0123585	9.8427	0.464833	0.666974
FRMPD4	0.148585	9.8187	97.4161	3.58664e-08
NPDC1	-0.252246	9.81433	321.507	1.95506e-21
NCS1	0.16958	9.80423	213.903	1.36765e-12
ST6GALNAC6	0.00358205	9.77766	52.4045	0.43486
CDK9	0.0477916	9.81205	12.5631	0.0669113
SH3GL2	-0.0931378	9.79149	138.584	6.3001e-06
ARFGEF1	0.121629	10.0908	32.064	3.41324e-07
UBE2V2	-0.11906	9.9027	30.9636	2.38225e-05
STMN4	-1.08334	9.93299	3334.68	0
POLR2J3	0.130227	9.96196	34.0861	2.01725e-06
TMEM130	-0.146299	9.78587	677.792	1.66507e-16
EIF4H	-0.00385805	9.93333	0.0323388	0.889493
LINC00957	-0.0365806	9.78836	31.9737	0.0495352
EEPD1	0.291217	10.0275	147.606	7.17474e-29
TMEM106B	-0.202798	9.93659	89.1972	5.97485e-14
FSCN1	-0.689997	9.89599	1250.07	3.56976e-148
SH3BGRL2	-0.112444	9.81306	63.4946	2.02563e-05
AARS2	0.0132613	9.78434	8.93035	0.380988
MEA1	-0.0745758	9.78853	126.724	8.55442e-05
DNPH1	-0.163094	9.79355	352.46	6.68756e-14
GLO1	0.00674078	9.86221	0.113876	0.816576
HLA-A	0.388416	9.93203	280.106	1.21137e-40
TIGD6	-0.0709158	9.78848	116.764	0.000179777
ETF1	0.0234244	9.85295	1.49662	0.419543
TXNDC15	-0.123063	9.87367	37.3681	1.78275e-05
PAM	-0.0786963	9.81442	29.0698	0.00304794
CCNH	-0.237949	9.9063	131.623	9.13221e-18
SCOC	-0.119851	9.87224	35.8413	2.97745e-05
SEC24D	0.0860287	9.8074	46.7458	0.000603087
PCDH10	-0.238614	10.0169	124.978	2.74642e-22
GRINA	-0.171523	9.8182	135.105	2.1377e-10
FGF12	0.136699	9.85611	44.2669	3.04449e-06
GRSF1	-0.0823487	9.86427	17.4498	0.00431083
SEC61A1	-0.00736223	9.84199	0.168902	0.797553
MTRNR2L12	0.241748	9.82972	205.669	8.59787e-18
PRPS1	0.0282415	9.80696	5.13599	0.261186
RNF7	-0.192916	9.83802	123.624	8.74087e-12
RHOA	-0.0712151	9.96767	10.8683	0.0073076
NDUFA6	-0.0710493	9.82488	19.9261	0.0102787
BPHL	-0.0018799	9.78964	0.0729553	0.921634
NCAM2	0.0853795	11.0537	135.231	5.26773e-13
TPD52L2	0.0536581	9.85255	8.0256	0.0649258
PTPRT	-0.115295	9.80167	103.887	1.89457e-06
HSPA5	-0.274559	9.90159	169.14	3.99366e-23
MMP24OS	-0.124023	9.80522	106.593	7.23821e-07
PRNP	0.0611953	10.1072	9.23648	0.00848652
METTL5	-0.00358511	9.82808	0.0480479	0.898055
VDAC3	0.00338874	9.8588	0.0304644	0.907066
CHAMP1	-0.113156	9.82328	52.4902	3.93418e-05
RGCC	-0.294223	10.196	279.41	5.37123e-48
MVK	-0.0162898	9.82318	1.09413	0.554477
CKAP4	0.010869	9.79239	1.83796	0.595157
NDUFA12	-0.202653	9.85339	113.938	1.23551e-12
CNTN5	0.0569012	9.83119	11.2512	0.043905
KDM1B	0.124298	9.92349	30.4972	1.24114e-05
KPNA4	0.0366959	9.93474	2.6994	0.187686
EIF2S1	-0.0304747	9.87436	2.18191	0.292082
CNTN1	0.323756	9.93398	179.797	2.98504e-29
PCF11	0.110455	10.0177	26.1675	1.78247e-05
METAP2	-0.0458923	9.95567	4.27781	0.0889867
MCRIP1	-0.160769	9.8489	76.3867	1.85696e-08
MLF2	-0.172075	9.86253	77.8531	1.84986e-09
AP2B1	0.111452	10.0194	25.6063	1.44866e-05
SPCS2	-0.213276	9.97949	103.164	1.12684e-16
PAN2	0.0684328	9.84703	13.7138	0.0181898
STX5	-0.0364031	9.86367	3.33769	0.208778
IMPDH2	-0.0911622	9.80942	49.0928	0.000409796
PARL	-0.140446	9.79157	311.799	1.67297e-11
UBA1	0.336721	9.9724	225.205	1.10454e-33
MTCO1P12	-0.0132448	9.79027	3.36475	0.497958
NECAB1	-0.132723	10.2274	53.3896	3.99879e-11
SCG2	-0.499951	9.80147	2001.76	1.22442e-93
TMEM59	-0.0565639	10.0677	7.89541	0.0176097
ATP6V1E1	-0.0322258	9.89855	2.34335	0.258767
PSPC1	0.109937	10.1675	32.1256	6.17229e-07
GNRHR2	-0.00857755	9.78278	5.29833	0.538141
TM9SF2	-0.0415392	9.94151	3.61546	0.129546
CETN2	0.00113795	9.79971	0.0117443	0.961088
RNF187	-0.109596	9.83619	40.193	0.000109371
LYST	0.324522	10.046	194.096	1.84168e-36
ARPC3	-0.367173	9.86775	363.817	4.59669e-39
TMBIM6	-0.172403	10.1101	82.2024	1.43832e-14
GANAB	-0.0913975	9.85199	23.7553	0.00148922
ENC1	-0.128653	9.7826	1049.33	9.15059e-18
GRAMD1B	0.0541198	9.80214	23.2987	0.0232644
TTC9B	-0.0335294	9.78178	102.308	0.0110695
CASC4	0.143436	10.1414	49.7302	2.79922e-10
LRRC8B	0.359095	10.017	243.725	2.34901e-41
PRPF19	-0.0161359	9.82651	1.0175	0.562321
MAPT	0.4214	10.4939	942.387	6.74993e-126
LMO7	-0.238594	9.81263	294.4	1.25229e-19
RRP15	0.0754107	9.84366	16.2362	0.00902803
CDK5	-0.132714	9.78501	652.656	7.14739e-15
NTPCR	-0.168795	9.8257	110.734	1.05215e-09
ADAR	0.196257	9.95625	77.097	1.66365e-12
UNC119B	-0.0199686	9.79361	5.56884	0.346237
CDK14	0.396482	9.91673	267.394	3.00558e-41
GABRD	-0.149429	9.78028	3296.45	4.37745e-33
ARHGDIG	-0.128032	9.7829	982.962	5.07384e-17
LRP8	0.00355954	9.78197	1.19863	0.781605
CBX7	0.131041	9.9182	36.2873	4.59516e-06
BTBD2	0.0701367	9.8437	14.3432	0.0151447
RABIF	-0.0427145	9.79472	22.8271	0.0497502
CTNNB1	0.04066	9.98485	3.27279	0.124008
WAC	0.376166	10.2999	489.111	5.02871e-76
DSTN	0.0169213	9.95491	0.575722	0.53408
MIEN1	-0.198057	9.82457	158.042	6.55494e-13
TMEM132A	0.0334573	9.79304	16.6869	0.104442
CHI3L1	0.492647	9.82839	914.075	1.04605e-71
MAP2K4	0.527135	10.1664	597.742	2.58212e-111
FKBP8	-0.173097	9.88134	72.5446	1.15631e-09
RFPL1S	-0.0687801	9.78197	388.9	6.52263e-07
NOLC1	0.122797	9.82477	60.0425	9.36738e-06
PIK3R3	-0.00526719	9.7796	7.86708	0.586212
MRPL16	-0.0923981	9.80631	56.5374	0.000247865
PTOV1	0.0333143	9.84593	3.23274	0.248806
RAP1GAP2	-0.0350527	9.80577	8.20879	0.161038
RPL21P28	-0.00731399	9.77958	14.9605	0.449931
HNRNPA1	-0.0750204	9.91817	12.6933	0.00723547
AMPH	-0.0232703	9.78575	19.1118	0.164545
TNIP1	-0.0386424	9.82941	5.45882	0.168254
MXI1	-0.048685	10.21	7.25334	0.0185649
MTND2P28	-0.138116	9.79759	188.327	2.25307e-09
KCTD21	0.0143532	9.78769	5.68905	0.418659
WASHC2A	0.114078	9.89258	28.5261	8.77354e-05
REPS2	-0.193838	10.0826	81.9198	3.5264e-17
FBXO34	0.250712	9.91391	113.786	6.58367e-18
GSTO1	-0.2635	9.89679	164.329	3.23184e-21
CBX6	-0.0663248	9.89823	9.74172	0.0196837
DNAJC6	-0.0687016	10.6102	43.8128	4.99018e-06
EIF4G2	0.249161	9.95758	124.531	4.82308e-19
TCAF1	-0.0390662	9.89885	3.33776	0.170543
ITPK1	0.215167	10.0538	95.7856	1.11886e-17
SLC35F1	0.113855	9.83051	44.3673	5.45848e-05
DDX24	0.00769906	9.96367	0.123452	0.774941
NAV3	0.330924	10.1124	251.579	4.82563e-43
WARS	-0.0328009	9.80631	7.05217	0.191676
EID1	-0.254995	9.98586	150.035	1.03293e-23
MYO5A	-0.254994	10.2397	224.75	5.15882e-39
ALDOC	0.0730222	9.78968	121.927	7.33486e-05
KCNMA1	0.589328	9.90898	646.718	6.83222e-85
NDUFAB1	-0.223965	9.86064	135.253	3.9182e-15
RPS27AP16	-0.126283	9.78913	318.9	1.18867e-10
FAM96B	-0.237354	9.89169	135.86	2.70149e-17
PHLPP2	-0.0503714	9.83911	7.7838	0.0775093
KARS	-0.00927703	9.82098	0.368289	0.734391
CMC2	-0.289478	9.91609	184.152	2.89335e-26
AC135782.1	-0.0695282	9.77831	3578.76	3.80768e-17
RPL23	-0.210187	9.91136	100.024	3.09758e-14
ELP5	-0.0993014	9.79418	127.894	5.21583e-06
ARHGAP27	-0.112961	9.79488	155.348	3.23927e-07
RAD51C	-0.0497001	9.87352	5.86003	0.0852802
ADAMTS10	-0.0274709	9.78287	51.5075	0.0543498
ETS2	-0.0201958	9.78573	14.8172	0.226278
CYB561	-0.0399766	9.78044	250.206	0.00057715
NFRKB	-0.00587859	9.80892	0.207795	0.81839
EIF2AK2	0.300731	9.89604	183.194	2.66206e-24
SRP68	-0.00309194	9.85404	0.0261983	0.915049
TCF4	0.0313108	10.5872	9.26343	0.0437971
GPR150	0.00436252	9.77744	194.746	0.21344
FAM81A	-0.0241482	9.80673	3.65411	0.337811
SYT4	-0.146809	9.78327	1133.67	1.02341e-20
DOK6	-0.099257	9.79376	125.328	4.44239e-06
SMU1	-0.0863167	9.95618	15.9811	0.00129504
BSG	-0.13544	9.87401	44.6469	2.26509e-06
PIK3CB	0.0822754	10.046	13.5945	0.000939287
MAP2K2	-0.12755	9.90656	36.7601	5.46721e-06
STARD3NL	-0.16668	9.83275	95.6365	2.95412e-09
SLC2A3	-0.0107309	9.79857	1.085	0.641016
GTF2F1	0.0533595	9.80864	17.7208	0.0358846
CPLX1	-0.176521	9.78517	1093.69	3.67423e-24
ERC2	0.219134	9.9521	76.8518	4.95771e-15
MRPS7	-0.139283	9.80664	127.63	3.84061e-08
AC010615.2	0.0238661	9.79564	6.85173	0.273521
SRSF10	0.166604	9.99992	57.9298	2.97845e-10
ZNF540	0.0302498	9.82966	3.33333	0.281945
SIRT2	0.00501627	10.0785	0.0616345	0.832737
RPS16	-0.164718	10.0249	62.6877	2.1466e-11
PRPF31	-0.0149026	9.82301	0.916491	0.588491
EPHB6	-0.271826	9.78801	1669.43	5.21171e-44
ADD3	0.0594239	10.2303	10.6039	0.00397248
GLT1D1	-0.084182	9.78583	232.415	1.1729e-06
EPN1	-0.0813413	9.82004	29.143	0.00281854
YWHAQ	-0.164331	10.219	91.363	3.59057e-16
DYRK4	-0.123812	9.79278	220.85	6.36468e-09
ATRAID	-0.266958	9.82072	314.746	8.88313e-23
TOMM7	-0.3936	9.94504	360.155	3.26776e-51
ACTR1B	-0.182267	9.84731	100.18	1.63017e-10
CXorf40B	-0.0291897	9.78561	31.451	0.080305
BEX5	-0.104403	9.78458	440.076	2.70424e-10
SYP	0.0237396	9.83206	1.89596	0.401047
PORCN	-0.0767462	9.7856	207.458	7.14867e-06
UXT	-0.0936179	9.82513	34.7806	0.000722453
NDUFB11	-0.400062	9.82965	603.438	9.883e-48
RGN	-0.0110208	9.81722	0.559588	0.682119
CXorf40A	-0.0388647	9.79263	22.7072	0.062582
SET	-0.0392946	9.9476	3.25709	0.149118
DNM1	-0.119569	9.81405	69.7759	6.53191e-06
STXBP1	0.11206	9.8693	28.6739	0.000131963
GNAQ	0.0148386	10.4298	1.1729	0.392597
ELAVL2	0.00234387	9.78256	0.419578	0.862448
RAD21	0.239661	10.053	124.341	2.20838e-21
ZNF706	0.133153	10.2104	53.0954	3.68027e-10
PEX2	-0.26717	9.88382	173.42	2.12619e-21
ASPH	0.186418	9.99069	64.6744	3.37658e-12
XIAP	-0.0216474	9.93309	0.961519	0.43456
BAG4	-0.108357	9.84387	34.8335	0.000150351
TRIM35	-0.132737	9.8085	106.065	2.33076e-07
TUSC3	-0.200238	9.79327	530.904	3.521e-20
AP1S1	-0.260508	9.80373	498.079	9.78082e-26
PEG10	0.107856	9.83458	38.8625	0.000153265
HSPB1	1.35097	10.0088	2268.65	0
MLXIPL	0.0108113	9.78886	2.68538	0.559719
TSPAN13	-0.0453197	9.78322	120.112	0.00225419
SRSF3	-0.0579974	9.96611	7.21444	0.0294683
GNL1	-0.0916179	9.81009	48.084	0.0004066
ATXN1	0.12659	10.5415	95.782	7.32734e-15
RPL15P3	-0.292854	9.78962	1557.53	1.08419e-46
SPOCK1	0.0897602	10.8016	93.4504	5.05947e-11
PLK2	-0.209015	9.78431	1812.2	4.4468e-35
ARHGAP10	-0.0359295	9.79398	16.6798	0.0937281
CCDC126	0.0820699	9.85639	16.9861	0.00491957
LIMCH1	-0.0831466	10.6851	73.9312	5.96937e-09
RGS12	0.127587	9.84847	43.7953	1.16943e-05
RNF168	0.22142	9.87995	106.256	6.5477e-14
GYG1	-0.0698986	9.81136	26.5233	0.00740981
NEK11	0.0459173	9.84626	5.76517	0.112324
TUSC2	-0.144663	9.8004	180.021	1.48366e-09
UQCRC1	-0.167922	9.8257	110.885	1.28333e-09
SELENOM	-0.347511	9.87987	309.461	1.8824e-35
PES1	0.0382777	9.80742	9.5058	0.128931
MAPK8IP2	0.00368269	9.79319	0.194534	0.859983
HSPA13	-0.102498	9.8281	39.7658	0.000238895
NBDY	0.119482	10.0132	26.0987	3.97952e-06
ZNF449	-0.00445995	9.79591	0.23202	0.839732
RPL24P8	-0.0274384	9.77933	228.681	0.00460782
SLC12A5	-0.182891	9.78548	1099.83	3.87477e-25
SLC23A2	0.147257	9.99088	41.1165	3.22709e-08
CHPF	-0.0349136	9.79251	18.5854	0.0931104
PNKD	-0.290661	9.86572	224.47	9.78157e-25
SLC39A10	-0.105916	9.91702	23.1413	0.000143832
HCG18	0.174546	9.84663	86.6082	2.04114e-09
DBI	-0.241944	9.95819	131.653	3.08378e-20
EIF5B	0.139559	9.97941	37.1065	2.20891e-07
DCTN1	-0.0886945	9.86158	21.1177	0.00209896
RPH3A	-0.0418393	9.78867	38.6601	0.0264164
TTTY15	-0.526478	9.8003	2445.11	6.37245e-106
HECTD4	0.4522	10.0738	414.912	1.55598e-70
THAP2	0.0466132	9.82735	8.25508	0.0953077
HSF1	0.102665	9.83062	37.2899	0.000274799
DZIP1	-0.169482	9.79037	489.829	1.03428e-16
VMO1	0.0110725	9.77937	45.7043	0.207998
USP5	-0.104159	9.81575	53.2767	9.81642e-05
JTB	-0.279796	9.85251	226.539	5.68451e-23
TM9SF3	-0.0756344	9.98965	12.3594	0.00349087
PDCD5P1	-0.00161261	9.77712	215.453	0.419737
B3GAT1	0.405514	10.0853	360.634	3.6038e-59
PSMB1	-0.0394188	9.95132	3.34398	0.146257
PTGES3	1.02605	10.3449	2626.23	0
SCAF11	0.366384	10.1409	316.709	9.92627e-55
SF3B5	-0.230224	9.82647	209.626	8.28045e-17
MRPL51	-0.266107	9.84061	230.19	3.88678e-21
EXOC1	0.0281657	9.98346	1.64048	0.286557
WASF3	-0.0573596	9.88436	7.32228	0.0458316
GLUL	0.0296515	10.2148	2.63482	0.154561
ALDH9A1	-0.11085	9.82511	48.2704	6.19017e-05
B3GALNT1	-0.0380254	9.78195	125.84	0.0046982
TGOLN2	-0.0804438	9.95901	14.2026	0.00265362
PUS3	0.0504045	9.79844	25.6141	0.0263917
BANF1	-0.138702	9.85004	55.0798	1.28493e-06
CROCCP2	-0.161262	9.88472	61.7156	1.39074e-08
RAE1	0.0266303	9.81227	3.88683	0.308514
RPL27A	-0.0759012	10.006	12.9438	0.00283497
ABCB8	0.017948	9.81519	1.61642	0.500053
PLPP3	-0.146129	9.92955	43.4019	9.57796e-08
FABP3	0.0113202	9.79218	2.03764	0.578006
MARCKSL1	-0.848188	10.0283	1948.79	3.33534926854303e-313
NAA60	-0.0785237	9.79396	81.4959	0.000282197
FBXW7	0.110806	10.0153	20.7192	1.76582e-05
ACTR8	0.0480709	9.80724	15.1845	0.0559209
WRAP73	-0.00880592	9.81083	0.443202	0.734394
CMPK1	-0.0523595	9.8876	6.17488	0.0679555
CCNL2	0.10683	9.9749	23.6807	7.38058e-05
IDI1	-0.199086	9.87439	100.163	2.67596e-12
RITA1	-0.000809952	9.78154	0.0719182	0.947931
FBXL15	-0.124966	9.79707	163.345	4.86324e-08
C9orf116	0.0115792	9.78224	11.6303	0.37349
PRDX3	-0.0677573	9.83562	15.4833	0.0168961
MKL2	-0.0388025	9.83483	4.71203	0.171259
SSRP1	0.00907865	9.81047	0.474389	0.725575
HES4	-0.399112	9.78391	7662.67	3.68493e-122
MAPK3	-0.149088	9.81837	102.164	3.49683e-08
NECTIN2	0.0302892	9.78536	38.3748	0.0551165
KSR2	-0.0712558	9.79987	43.8912	0.00254745
ANAPC5	-0.314163	10.1153	289.163	6.89564e-47
GREM1	-0.658668	9.89071	1080.98	5.09406e-133
FAT3	-0.131564	9.80961	96.3463	3.61793e-07
POMGNT2	-0.0457562	9.79466	26.3759	0.0354864
S100A1	-0.446404	9.81507	986.101	6.36864e-64
PLPPR4	-0.168104	9.78551	933.61	1.32557e-21
PTP4A2	0.122148	10.2102	45.6528	8.52129e-09
ANAPC10	0.0735406	9.98294	9.84455	0.00570598
NR1H2	0.0196823	9.83634	1.28931	0.489887
TMEM121	-0.276297	9.79017	1366.47	7.00926e-41
AC008026.1	-0.0075642	9.78043	9.97145	0.492837
PSMC3	-0.240062	9.82058	252.666	1.05014e-18
GSK3B	0.0783611	10.1777	16.0811	0.00031116
TTLL7	-0.112135	10.8163	213.497	1.22302e-17
PEMT	-0.0862175	9.7985	69.6985	0.000208444
PLCB1	0.135016	9.93388	35.3032	1.69713e-06
C1orf174	-0.150488	9.80201	178.372	6.34164e-10
SIK2	0.193757	10.2607	112.826	3.23543e-21
FAUP1	-0.0389662	9.78036	243.412	0.000695427
TMEM126B	-0.243292	9.84827	177.281	1.0526e-17
NASP	-0.0930658	10.0967	22.1519	5.14841e-05
GPBP1L1	0.174969	10.0027	61.1273	3.39045e-11
ARL5B	0.0592442	9.82175	14.8394	0.0306854
RASGEF1A	0.0269861	9.78322	49.5764	0.0507805
NSMCE4A	-0.0909454	9.8494	24.0954	0.00155086
YWHAE	-0.0121035	10.117	0.377413	0.59512
NCOR1	0.270293	10.2969	280.886	3.20575e-41
TSEN15	-0.00836797	9.97759	0.143069	0.751882
CHID1	-0.224252	9.82522	200.609	4.15873e-16
SLC25A3	-0.17429	9.88873	71.9192	7.40925e-10
MT1E	0.411273	9.88761	337.308	6.84015e-43
LAMTOR1	-0.268764	9.85704	203.833	2.91836e-21
NRAS	-0.020889	9.80044	3.85269	0.376666
MLST8	-0.0153006	9.78847	5.68915	0.408738
PSME2	-0.061648	9.79501	46.0305	0.00500472
PALM	0.0534184	9.79852	28.2944	0.0186687
COX8A	-0.335682	9.8445	350.418	8.25757e-33
SUCLA2	-0.0752521	9.93083	11.5081	0.006382
FAM192A	-0.00563552	9.90836	0.0692702	0.842695
RNF41	-0.0660709	9.81721	20.1555	0.0141077
PEG3	-0.225326	9.89483	115.861	9.03504e-16
DNAJC3	-0.180898	9.97979	67.0914	2.47094e-12
RING1	-0.0460826	9.83843	6.82885	0.106055
KPNA2	-0.0526931	9.79641	31.1054	0.0188965
AHSA1	0.679351	9.97771	800.551	5.07834e-122
PSME2P2	-0.00293934	9.77731	125.261	0.390262
BBS2	0.179324	10.1454	84.1536	3.33718e-15
TMEM50A	-0.15531	9.88087	58.4044	5.04709e-08
ETFA	-0.238412	9.81485	275.654	3.16637e-19
EMC10	0.100789	10.0354	21.7463	6.43673e-05
FAM173A	-0.275529	9.81668	369.367	8.00233e-25
FLYWCH1	-0.202544	9.83754	135.348	7.22928e-13
MBIP	0.00906329	9.8518	0.227811	0.75439
HIRIP3	0.00907558	9.79803	0.846931	0.689977
ATG16L2	-0.0652152	9.83661	13.7209	0.0217027
NDRG4	-0.1287	9.80265	125.356	1.43423e-07
SGTA	-0.0883795	9.89403	18.0818	0.00189911
LAMTOR4	-0.304327	9.87468	238.357	3.32456e-27
PELI3	-0.0732238	9.78906	113.875	0.000145853
BAD	-0.154645	9.80086	198.654	1.30753e-10
ZFP90	-0.0279414	9.89555	1.73321	0.328748
BLOC1S1	-0.426189	9.83997	603.223	7.67285e-53
CDK5R1	-0.0559302	9.79346	42.9683	0.00869857
SAT2	-0.109632	9.87233	30.1143	0.000135817
SLC1A4	0.0600787	9.81309	18.6517	0.0220443
GPALPP1	0.0209532	9.84041	1.37681	0.465125
TVP23C	-0.128846	9.80279	129.221	1.44312e-07
NFIB	-0.0382552	10.307	4.77679	0.0440277
ODC1	-0.0526597	9.7914	46.4056	0.00974146
TVP23B	-0.138278	9.84467	57.5628	1.27587e-06
EPN2	-0.0171913	10.3047	1.1922	0.367865
XPC	-0.058261	9.82977	12.4863	0.037813
PTGES3L	-0.00868112	9.77904	32.1528	0.319375
MED1	-0.0716985	9.84225	15.7336	0.012199
RPS13P2	0.000645516	9.77767	1.49551	0.893757
ID2	0.0720854	9.7958	62.9254	0.000829581
DUSP1	-0.00988394	9.80295	0.74446	0.683975
PIAS4	0.064777	9.87463	9.95324	0.0263864
ZNF426	-0.0902985	9.81258	43.3557	0.000597274
PRDX2	0.029211	9.82124	3.72614	0.28576
PRKACA	-0.0809419	9.84145	20.2085	0.00460501
2022-03-06	0.251942	10.2962	248.488	3.35785e-36
SMDT1	-0.1636	9.84324	83.332	9.08633e-09
RAB11FIP5	0.0192916	9.78795	9.81797	0.280358
FBXO27	-0.177256	9.81233	165.71	1.55781e-11
SLITRK4	-0.0771403	9.77969	1296.18	2.28159e-12
MAGEE2	-0.000964418	9.77724	24.6489	0.737479
USP11	-0.0120893	9.91184	0.309732	0.669194
CLCN4	-0.0684985	10.0151	10.2623	0.00655309
SLC27A4	-0.0545129	9.82949	10.6412	0.0518576
RAD23B	0.0433571	9.93311	3.78003	0.120454
SHC3	-0.0583712	9.79951	29.7191	0.012879
VCP	-0.00788502	9.89075	0.141542	0.783959
CHMP5	-0.112169	9.86337	33.1148	9.70599e-05
RRAGA	-0.283556	9.82973	304.564	1.71816e-24
FDFT1	0.473062	10.0669	432.298	1.60769e-75
LUC7L2	-0.0664151	9.84965	12.9337	0.021055
EXOC4	0.0839041	10.3219	25.5031	1.14102e-05
CBLL1	-0.0342773	9.82822	4.41292	0.220344
CHN2	0.104927	9.80627	77.2541	2.2482e-05
ARL4A	-0.0375663	9.80283	11.0273	0.122482
ADAP1	-0.028184	9.84474	2.38998	0.326974
HCG11	0.0465075	9.78817	58.1168	0.0086969
CAP2	-0.0919478	9.79529	97.3422	3.41219e-05
GMDS	0.197502	9.91893	65.49	6.91546e-12
GABRG2	-0.165498	9.78489	1013	4.80956e-22
TMEM161B	-0.176682	9.91141	67.1163	2.02227e-10
TRIM23	0.0500621	9.92206	5.29299	0.0762319
RPL26P19	-0.0718062	9.85105	14.5866	0.0126559
RPS27AP11	-0.0135456	9.77912	68.9461	0.131922
NCBP2	-0.012497	9.81022	0.909766	0.628785
PSMD2	-0.0927738	9.83581	29.0077	0.00106026
TMSB4XP4	-0.143196	9.78632	601.991	1.98776e-15
MCCC1	0.240536	9.97008	111.78	2.60698e-18
TBL1XR1	-0.118651	10.3629	64.087	3.53444e-11
TAF9	-0.0901653	9.79558	94.8344	5.22186e-05
COPG1	0.0275639	9.82215	3.20613	0.315515
C3orf14	-0.114164	9.79792	127.672	8.11176e-07
MAP4	-0.110934	10.1186	30.6207	7.42803e-07
EMC3	-0.156741	9.87438	59.5482	4.16391e-08
POLR3H	-0.0168918	9.81224	1.54715	0.519062
TXN2	-0.210552	9.8284	168.847	3.57208e-14
CLEC2L	-0.0115086	9.77871	74.643	0.156588
CDS1	-0.0269274	9.7853	27.5081	0.101238
DGCR2	0.021271	9.95096	0.893925	0.436672
PRMT2	0.0354351	10.0507	2.83342	0.149432
INTS1	0.0666154	9.82966	16.0756	0.0178943
DPM1	0.103847	9.86035	27.7111	0.00038792
FITM2	-0.0535297	9.79279	42.4232	0.0108684
SLC24A2	-0.145017	10.9728	498.901	4.52498e-34
PKIG	0.197794	9.90598	75.5712	1.03983e-11
EDEM2	-0.112078	9.81796	57.5935	3.31312e-05
RIPPLY2	-0.115174	9.79545	156.35	2.48304e-07
ZNF133	-0.0409831	9.84968	4.66233	0.155286
SIRPA	-0.0627174	9.90244	8.63653	0.0269771
PSMD1	0.0631167	9.98655	8.00688	0.0170793
RETREG2	-0.0970323	9.84946	27.5383	0.000729658
KCTD18	-0.0401454	9.81714	7.55075	0.135666
UBE2G2	0.0864802	9.94495	15.3194	0.00182272
PDE1A	-0.475638	10.1505	459.123	2.75997e-101
NPC2	-0.181307	9.83816	108.387	1.46054e-10
ZFAND2B	-0.0623057	9.80785	24.2988	0.0144714
ACTR10	-0.160127	9.81632	124.801	2.31136e-09
EFR3B	0.536338	9.95795	478.111	1.1145e-76
OST4	-0.201428	9.81663	196.558	5.92341e-14
SNX17	-0.211602	9.81129	251.787	5.73101e-16
CBLN2	0.02544	9.77953	235.109	0.00296725
RAP2A	-0.176735	9.85415	85.0861	6.44501e-10
TXN	-0.281826	9.846	241.308	2.14858e-23
PGRMC2	0.0543123	9.90126	6.31656	0.0588004
BRI3BP	-0.0883019	9.82034	33.5776	0.00119944
TYRO3	0.134544	9.97425	37.1183	6.67384e-07
EDF1	-0.358259	9.896	311.981	1.58331e-38
ZNF865	-0.0580364	9.79564	39.4813	0.008898
GFRA2	0.0273301	9.78308	53.9019	0.0453844
DNAJB9	-0.181121	9.80306	248.702	1.93068e-13
NECTIN1	-0.284811	9.8857	197.044	3.07598e-24
AURKAIP1	-0.2904	9.84399	266.63	7.96376e-25
TRIM8	0.0371736	9.85211	3.83275	0.200401
FH	-0.118794	9.80936	84.3014	4.16925e-06
CTSF	-0.130756	9.91106	38.4728	2.86119e-06
ABHD13	-0.035917	9.82005	5.63326	0.18733
LMO4	0.0598408	9.90008	7.47016	0.037616
SDF2	-0.122272	9.82583	59.0821	1.02905e-05
TRAPPC3	-0.135382	9.82916	67.7993	1.25481e-06
FAM120B	0.20139	10.0854	88.6436	1.04671e-16
CHGB	-0.077082	9.78439	258.141	1.87397e-06
CDS2	-0.103138	10.0345	23.4193	2.64205e-05
PTPN4	0.0399265	9.99244	2.987	0.127752
AP3S1	0.0272641	9.87421	1.66081	0.348441
SNX9	0.229018	10.1482	127.488	1.32972e-23
UBE2J1	-0.108859	9.8472	34.6002	0.00014569
MOAP1	-0.148255	9.79851	209.733	2.38257e-10
ALKBH5	0.208099	9.88944	94.0604	1.46203e-12
LINC01535	-0.40141	9.83247	584.015	1.20005e-47
DOHH	-0.181313	9.84991	98.3296	2.14785e-10
ZBTB8OS	0.143759	9.93395	40.0265	3.54717e-07
SORT1	0.219498	10.8026	928.183	8.2609e-56
ARV1	-0.0876466	9.82565	29.2601	0.00157664
SMUG1	-0.145064	9.80103	174.469	1.72724e-09
ZC4H2	-0.153698	9.90376	46.8588	4.23376e-08
PNMA8B	-0.0348212	9.78415	59.754	0.0252116
MTCO3P12	0.00160983	9.77859	1.83647	0.829227
B9D1	-0.0170079	9.81703	1.34269	0.526954
RNF175	-0.0513759	9.78131	282.893	6.69182e-05
EVI5	-0.0280251	10.1919	2.09367	0.184097
TPP1	0.142179	9.8924	44.9949	1.09226e-06
ENSA	0.247274	9.89588	123.356	4.24471e-17
STPG1	-0.0619337	9.83327	13.119	0.028373
FBXO44	-0.0660517	9.81096	24.0927	0.0111815
SLC25A33	0.0458656	9.83297	7.08314	0.105634
TMCC1	-0.0638792	10.1793	10.4892	0.00263591
PSMD13	-0.0549225	9.84888	8.80324	0.0564984
GABRA1	-0.064497	9.78187	351.271	2.41103e-06
LUZP1	-0.0175876	9.80335	2.25197	0.471105
MRPL21	-0.188798	9.80585	239.745	7.11757e-14
KCTD2	-0.0997889	9.81295	52.618	0.000153508
ATP6V1B2	0.0711286	9.85429	13.6487	0.0146238
CAMK1D	0.255963	9.86439	156.141	5.4412e-18
EPHA4	-0.0107395	9.79418	1.43933	0.6156
MED10	-0.227605	9.84636	159.301	1.11087e-15
TMEM177	-0.077565	9.79027	113.06	0.000100916
SRPRA	-0.117968	9.81432	72.0516	8.91203e-06
LUC7L3	0.14979	10.3898	129.293	2.52674e-16
AP4S1	-0.134106	9.84418	52.5121	2.6287e-06
TXNL1	-0.176369	9.94785	66.4047	4.45608e-11
UBE2T	-0.0044018	9.78039	3.40903	0.686766
ARHGEF25	0.00405218	9.78043	2.97262	0.707059
PSMC2	-0.109412	9.82755	46.1664	8.56876e-05
INA	-0.222431	9.78396	2200.14	1.68569e-40
BMPER	-0.0346854	9.80355	8.05898	0.156776
GLUD1	0.201099	10.0363	80.3477	3.55487e-15
CAMK2G	0.149081	9.82638	81.2494	8.76294e-08
ATPAF2	0.0439092	9.81864	8.71727	0.104626
SNAPC3	0.137226	9.93383	37.695	1.15241e-06
CCDC25	-0.0259354	9.82696	2.56122	0.352231
RAB39B	-0.0187903	9.80119	2.99194	0.43049
MFAP1	0.133891	9.84931	49.3425	4.33471e-06
HAGHL	-0.192839	9.79641	398.697	3.23777e-17
WNT10B	-0.0425473	9.77814	1768.88	1.20247e-08
HMOX2	-0.332364	9.83704	380.076	1.47169e-32
GRIN2A	-0.6835	9.90781	1060.06	1.20207e-148
LCMT1	-0.0536693	9.89707	6.30083	0.0596902
C1orf123	-0.181682	9.8294	124.535	7.30236e-11
UBB	0.0570375	9.79251	53.1421	0.0046815
CMIP	0.319005	9.904	190.505	2.82368e-27
CLTC	0.133074	10.055	38.9831	8.15799e-08
AC120114.2	-0.0958109	9.79138	153.365	3.24567e-06
TMEM127	-0.0648816	9.81078	23.5912	0.0125966
CDC37	-0.110617	9.84179	38.4006	0.000105414
DUSP14	-0.00153144	9.78979	0.0475964	0.936393
H2AFY	-0.00177909	9.86196	0.00826128	0.951165
NT5C3B	-0.1472	9.80477	151.245	3.71119e-09
TACO1	-0.064998	9.78928	88.3255	0.00078137
LSM5	-0.131626	9.82653	67.7233	2.12471e-06
AMZ2	-0.00303489	9.81253	0.0497041	0.907895
VGLL4	0.159367	10.0311	49.5035	4.42706e-10
GMPR2	-0.0798542	9.80183	51.7176	0.000953033
GPS1	-0.129093	9.81357	86.6215	1.06524e-06
RNMT	-0.0874109	9.95331	15.7932	0.0011611
TRAPPC4	-0.144821	9.82386	86.1165	1.46349e-07
CYSTM1	0.218169	9.84061	140.61	4.42876e-14
USP1	-0.00449847	9.831	0.07237	0.873189
RPL10P16	-0.289156	9.79304	1102.91	6.06969e-40
SAT1	-0.429605	9.88268	430.579	2.46036e-54
NDUFB7	-0.484837	9.87902	612.846	3.8882e-69
POLR2I	-0.414008	9.85291	500.931	2.27318e-49
ORAI2	0.0244441	9.79247	9.28562	0.230836
NEDD8	-0.272	9.85736	206.931	9.49933e-22
FLOT2	0.029884	9.80999	5.13022	0.245694
LINC00665	-0.137063	9.84304	57.2235	1.53069e-06
ZNF428	-0.317525	9.8373	343.883	8.66168e-30
EGR3	-0.0383691	9.78033	238.72	0.000786735
RUVBL2	0.138651	9.82311	78.845	4.72916e-07
MYADM	-0.240219	9.83653	193.134	1.33683e-17
AAK1	0.357729	10.1121	288.211	1.36106e-49
PRRG3	-0.0246116	9.77972	143.711	0.0167218
HPRT1	0.183907	9.89718	66.4972	3.05488e-10
MAP7D2	0.0116491	9.80204	1.02633	0.627054
TTF1	-0.0920716	9.83868	26.491	0.00121286
NTMT1	-0.0154478	9.78451	11.0011	0.323688
FAM120A	0.156938	9.99421	48.7366	3.51388e-09
OSTF1	-0.718299	9.9228	1278.7	1.2809e-170
DMAC1	-0.4091	9.83155	616.858	1.34386e-49
POLR2K	-0.189651	9.8146	181.499	9.82548e-13
DECR1	-0.0262837	9.87054	1.61281	0.364196
SDCBP	0.00947435	9.84218	0.269307	0.741619
TNKS	0.151134	10.3807	103.467	2.28017e-16
MTERF1	-0.308177	9.99264	182.451	7.87193e-35
GNAI1	-0.201558	10.3914	183.661	2.15955e-31
NEUROD6	4.64199e-05	9.77712	0.229113	0.979619
KDELR2	-0.122361	9.82298	62.8926	8.55282e-06
CLVS2	0.0238721	9.79006	11.0601	0.212191
C6orf136	-0.137806	9.79896	175.949	4.60995e-09
AL136968.2	0.0027888	9.77753	48.1122	0.495805
SMIM3	0.00390473	9.7796	4.62487	0.6791
SCAMP1	-0.109629	9.92907	24.6067	6.80925e-05
PTK2B	-0.0718875	9.81129	27.4914	0.00586936
HSPB3	0.00144037	9.7772	95.9877	0.527939
SMIM14	-0.156774	9.92624	52.4286	1.12143e-08
RSRC1	-0.042739	10.0976	3.78538	0.0646534
MBNL1	0.19286	10.4118	162.651	1.57744e-26
PXK	-0.021785	10.5875	4.24531	0.156974
RPSA	-0.273576	10.0192	177.761	3.49194e-29
CBS	-0.0969118	9.81285	49.5527	0.000234849
FP236383.2	0.202855	11.0587	792.365	7.65407e-64
ADRM1	-0.121847	9.8071	94.3459	1.61537e-06
PSMA7	-0.14274	9.91899	44.9676	2.54259e-07
ACOT8	0.0167781	9.79903	2.69669	0.466717
GAB1	0.0512711	10.7678	38.3335	0.000216664
NNAT	-0.0488271	9.79705	24.8492	0.0311265
FRG1BP	-0.308152	9.83263	340.927	1.9223e-28
TMEM230	-0.194656	9.94898	82.7498	2.95278e-13
SPCS3	-0.434263	9.90861	456.431	5.4297e-58
PLEKHA3	-0.0743776	9.93621	11.4356	0.0067236
HIST1H4C	-0.114401	9.91439	28.2137	4.13388e-05
PAIP2B	-0.109182	9.90058	26.3479	0.000111461
TCEA2	-0.226049	9.81954	228.105	7.44525e-17
MTIF3	0.00234225	9.87519	0.0131395	0.93561
BNIP3	0.0323928	9.88468	2.40046	0.263568
UBE2QL1	-0.0337575	9.77921	377.557	0.000425762
DDX50	-0.0595541	9.90466	7.55368	0.0354413
KCTD4	-0.2578	9.84526	203.06	8.73644e-20
TCTN1	0.0786017	9.80755	40.2348	0.00176439
STX1A	-0.00413183	9.78096	2.33832	0.72405
PSME1	-0.142101	9.81557	99.1638	1.04488e-07
SEC16A	0.101753	9.85476	27.8209	0.000492357
CD63	-0.104335	10.0162	23.0359	3.10177e-05
RALYL	0.0695315	9.95106	7.99036	0.011487
NR1D2	0.0840919	9.97703	14.1161	0.00171069
PRPF38B	0.0684033	9.89894	10.1984	0.01767
KCNMB4	0.204538	10.5283	231.513	9.30778e-35
SNUPN	-0.0164256	9.80388	1.99525	0.503161
TRIM69	0.0901109	9.80558	56.7417	0.000254676
HNRNPA2B1	0.29077	10.398	472.371	3.08427e-55
RALBP1	0.0841471	9.92104	14.2144	0.00301967
TESPA1	-0.0780576	9.77928	1716.16	4.47841e-14
NABP2	-0.0728012	9.80109	44.4491	0.00237495
RPL14P1	-0.24256	9.78755	1382.71	1.321e-36
RBM27	0.0297939	9.79896	8.68629	0.194709
CCDC124	-0.0680366	9.81343	24.0269	0.0100127
HADH	0.040175	9.83479	5.30596	0.157853
MKRN1	-0.0472726	9.85047	6.36857	0.101188
SNX27	0.0291156	10.0919	1.9509	0.215533
NIM1K	0.123246	9.89565	29.7296	2.22248e-05
HTRA1	-0.324883	10.155	314.393	3.00373e-54
PDZD11	-0.0771351	9.78462	246.793	2.39078e-06
ABRAXAS2	-0.00226462	9.82943	0.0183329	0.935716
LINC00507	0.00528647	9.7774	337.129	0.0943536
ARPC5	-0.17046	9.96527	65.3456	8.83832e-11
DTD1	-0.223409	9.80478	347.636	4.46753e-19
RPS8	-0.261593	9.99618	155.905	1.83012e-25
RALGPS2	-0.0785286	9.79754	60.6788	0.000612528
SLX1A	-0.0252733	9.7792	216.961	0.00715164
KCNIP2	-0.213351	9.79295	622.51	7.1074e-23
PHYHIPL	0.151024	10.3593	74.5517	7.53673e-16
SLIT3	-0.0423129	9.78753	46.1656	0.0197249
RWDD1	-0.191625	9.86561	93.7971	1.97336e-11
TRAPPC1	-0.352633	9.79693	1276.95	4.51878e-52
ATAD3B	0.0526332	9.80812	17.3751	0.0376815
NETO1	-0.150552	9.78509	818.477	2.22294e-18
SSR4	-0.438818	9.85447	569.749	1.7992e-55
TROVE2	0.0951638	9.98902	18.6173	0.000330095
EPS15	0.0304653	10.4306	5.11002	0.0796433
VPS29	-0.189434	9.87281	90.0071	3.04864e-11
CALR	-0.102169	9.82048	46.478	0.000179367
FERMT2	0.19741	10.088	84.6823	3.29062e-16
NFX1	0.244558	9.97053	113.339	7.13161e-19
ROMO1	-0.175766	9.80853	186.272	7.95623e-12
RABGGTB	-0.126447	9.82029	71.2581	3.45638e-06
RPS7P1	-0.0167341	9.77881	138.205	0.0478118
SPOCK2	-0.0884258	9.79818	74.4252	0.000134077
RTCA	0.0639437	9.90218	8.60913	0.0261444
KCNK1	-0.22819	9.92538	108.751	5.46695e-17
HBS1L	0.117137	10.2821	47.8365	3.79607e-09
SHTN1	-0.032897	10.5908	11.0826	0.0319232
PDCL3	-0.249041	9.79829	592.894	3.29022e-26
CNIH4	-0.0538738	9.85413	7.93313	0.0620791
FBXO28	0.118751	9.91128	27.3496	3.55545e-05
CDK2AP2	-0.00176702	9.83648	0.0103501	0.950567
RTN3	0.0992518	10.2992	38.8329	3.75156e-07
MAP3K2	0.248525	10.1429	143.758	4.33208e-27
COMMD8	-0.11269	9.79582	144.731	5.15364e-07
CACNG3	-0.0851392	9.78237	505.45	3.45911e-09
TIMM10	-0.20561	9.80015	364.061	9.30332e-18
SLC25A27	-0.0546148	10.0151	6.67146	0.0304941
ETNK1	0.0285218	10.1891	2.34597	0.181312
GABARAPL2	-0.33221	9.96318	257.517	6.56826e-38
IRF2BPL	-0.0163859	9.80281	2.08309	0.499505
AC091138.1	-0.0328429	9.77854	651.543	6.88103e-05
SLIRP	-0.415272	9.85619	502.798	1.15038e-49
IFI27L2	-0.286327	9.85038	241.657	4.98242e-24
MAP2K1	-0.147248	9.87204	51.4212	2.71092e-07
AL163051.2	0.0717078	9.78706	171.715	1.5203e-05
CTNNBL1	0.0776883	9.92497	11.9352	0.00596105
CINP	-0.0437169	9.86024	5.04379	0.130885
PRKAR1A	-0.0499536	9.92504	5.46966	0.0726666
RABL6	-0.0661169	9.83712	14.2935	0.0200435
ALDH2	0.158435	9.85951	63.4666	6.88292e-08
GRHL1	0.00445455	9.78094	2.79862	0.698582
FAM57B	0.00155358	9.77838	2.23093	0.823024
FTH1P20	-0.00750333	9.77827	55.2181	0.283165
GLG1	0.332754	10.2298	330.926	6.46808e-54
CAMTA2	0.0227281	9.80559	3.58421	0.360223
NDEL1	-0.0658053	9.86373	11.0044	0.0227427
RPS19BP1	-0.152117	9.85054	67.5594	1.06926e-07
MAPRE2	0.146145	10.2757	69.5254	3.36922e-13
RPL41P2	0.00792075	9.78221	5.60869	0.543549
U2AF2	0.0540266	9.82724	11.3498	0.0531448
CNDP1	-0.66015	10.3159	1557.21	1.73911107336119e-321
RABEPK	-0.0810276	9.83545	21.4584	0.00424352
MATK	-0.0546398	9.78106	344.532	1.49971e-05
SMIM7	-0.267427	9.81666	347.158	1.7903e-23
YJEFN3	-0.243901	9.80694	372.424	9.26081e-22
MRPL54	-0.221287	9.80542	333.555	1.41315e-18
UBAC2	-0.0680568	9.94924	8.7704	0.0120033
RAB3C	-0.0790699	9.79029	111.146	7.48722e-05
[truncated: 14,956 more rows]

## Sheet: opc_de_accumbens
	logFC	logCPM	F	PValue
AC007325.4	0.0355856	9.6192	1.01024	0.641685
TCEAL3	-0.0143116	9.65997	0.066377	0.874636
BEX2	0.155653	9.71578	5.78661	0.0885096
PGK1	0.302203	9.7177	20.1336	0.00106793
TSPAN7	-0.194345	9.79949	9.3702	0.0170402
TMSB4X	-0.217037	9.74979	10.6176	0.0114405
MRPL41	0.06251	9.62892	2.16697	0.449952
GRIN1	-0.0719146	9.61537	4.8532	0.330405
PTGDS	0.0495665	9.68782	0.579035	0.589448
MAPKAP1	-0.145056	9.89663	6.0029	0.0485872
ATP6V1G1	0.0986706	9.69412	2.43724	0.283544
HNRNPK	0.0988339	9.86755	2.63486	0.204613
RPS6	0.0138053	9.73822	0.0427449	0.876217
EIF3E	-0.0648562	9.80944	1.02175	0.426735
CLU	0.220109	10.0075	14.3294	0.00133732
NEFL	-0.119886	9.60624	27.3097	0.0571773
PTPRN2	-0.240021	9.99772	19.6443	0.000258845
DYNC1I1	-0.121157	9.71796	3.17142	0.174229
PURB	0.0578495	9.6733	0.98642	0.528733
PPIA	-0.0128056	9.70156	0.0414675	0.88805
CDK13	0.142559	10.1343	10.502	0.0189066
NDUFA4	-0.0239999	9.78385	0.135716	0.775818
RRS1	0.0234416	9.59887	4.17007	0.585815
PSMG3	0.0142392	9.61168	0.253669	0.836673
SYNE1	0.182788	10.1568	17.3069	0.00228054
AL356599.1	-0.124325	9.72587	3.6434	0.160329
FAM110B	0.010214	10.2039	0.0586722	0.856445
TSPYL1	0.0175713	9.65247	0.104559	0.845055
PPIL6	-0.0498497	9.62297	1.66433	0.531776
HSP90AB1	0.297155	9.97288	23.1929	3.31353e-05
RPL10A	-0.121245	9.73404	3.52123	0.167891
ATP6V1G2	-0.045498	9.60841	3.35047	0.487205
ZKSCAN8	0.148324	9.73597	5.19774	0.0989371
NOL7	0.0895036	9.67394	2.32655	0.330694
TUBB2B	-0.406485	9.7537	40.28	1.32229e-06
FLOT1	0.046688	9.69341	0.551894	0.610636
CXXC5	-0.0103915	9.68962	0.0276745	0.909505
MATR3	0.287421	10.1152	40.0434	4.79353e-06
VDAC1	0.0797687	9.73451	1.46134	0.372561
MEF2C	-0.267937	9.78266	15.1265	0.00115132
SMN1	0.50942	9.68186	68.2948	6.27927e-08
TCEAL2	-0.143983	9.65594	7.04078	0.108764
SMN2	0.869212	9.6898	195.127	8.12607e-20
SUB1	0.0140049	9.80562	0.046454	0.865366
BASP1	-0.133712	9.88067	4.83582	0.0742659
RETREG1	-0.0644555	9.70137	0.971487	0.476877
RPS20	-0.0151108	9.73483	0.0521926	0.864704
CPE	-0.0330082	10.0719	0.446024	0.598928
CISD2	0.135612	9.65231	6.40207	0.13254
HNRNPDL	0.177737	9.94683	10.1422	0.0141028
TBC1D1	-0.17874	9.75501	7.00453	0.0369063
QDPR	0.0194175	9.74189	0.0788137	0.826101
ADD1	0.0312448	9.87985	0.269451	0.682266
NSD2	-0.0625512	9.80387	0.938191	0.446262
SLBP	0.486165	9.7104	46.0815	2.32667e-07
IQCJ-SCHIP1	0.163346	9.78528	4.69761	0.0567802
H1FX	0.0194987	9.64412	0.148957	0.825226
TCEAL6	-0.110328	9.62141	8.74686	0.161985
RAB7A	0.199322	9.87586	9.73289	0.010707
FAM162A	-0.0971851	9.67916	2.43002	0.28579
SHISA5	-0.0451895	9.64478	0.81461	0.608964
SETMAR	0.0768874	9.6041	16.9757	0.164009
PRKAG2-AS1	-0.0024855	9.59754	0.0699	0.949633
DGCR6L	0.0170971	9.61651	0.268569	0.817903
DGCR6	0.0237379	9.63067	0.289599	0.776762
SMIM11A	0.127002	9.66244	4.95126	0.165031
SON	0.377164	9.94231	43.1224	4.12746e-07
SOD1	0.406153	9.75575	34.7508	7.10926e-06
SMIM11B	0.076955	9.65803	1.91683	0.396908
TAF1	0.215618	9.80792	10.4777	0.0104015
CDH4	-0.37057	9.87004	34.1106	5.46247e-07
RPL32	-0.0876402	9.80814	1.68696	0.282424
BLCAP	-0.112692	9.68937	3.43378	0.214464
NORAD	0.0879622	9.69235	1.94103	0.338973
MAP1B	-0.0146602	9.92315	0.0562688	0.839869
PDRG1	-0.0252878	9.61062	0.851201	0.710973
NSFL1C	-0.132403	9.67618	5.15833	0.144955
ITM2C	-0.337052	9.84202	29.3637	1.07389e-05
RPL37A	0.175318	9.93559	8.3965	0.0166336
SPATS2L	-0.0501318	9.92447	0.67323	0.487282
CHN1	-0.168868	9.86037	7.03809	0.026889
RASGEF1B	0.162997	9.91376	5.89034	0.0292253
ORC4	0.321388	9.91452	26.259	2.40497e-05
CMSS1	-0.189728	9.67967	9.92707	0.0360224
RPL6	-0.0577828	9.75859	0.762762	0.503125
ANAPC16	0.308136	9.78164	20.2823	0.000419356
DCTN2	-0.0689252	9.7077	1.2163	0.444943
SRSF5	0.318645	9.85238	26.0844	8.63329e-05
GPX4	0.193538	9.68858	9.45	0.0368484
CCDC59	0.458652	9.74512	42.2381	5.74053e-07
TPT1	0.280298	9.86029	17.4665	0.00046897
MYL6	0.0803282	9.6773	1.8128	0.382818
GTF3C6	-0.128363	9.65535	5.68719	0.152784
CWC15	0.129206	9.65408	5.81107	0.153104
BEX1	-0.243915	9.7009	15.442	0.0063596
ATP6V1F	-0.0950962	9.63209	4.55223	0.260216
PSMC6	0.15143	9.69804	5.74578	0.100619
FHL1	0.211583	9.73039	10.4297	0.0198241
PFDN5	-0.0700617	9.703	1.21842	0.438783
ARF5	0.0166501	9.59852	2.27042	0.69257
MLLT11	0.0604374	9.63645	1.7019	0.482342
RNPS1	-0.0581256	9.68867	0.920519	0.523682
ZCRB1	0.0686035	9.62742	2.7874	0.402233
SSB	0.248879	9.71572	14.6298	0.00687335
DYNLL1	0.151057	9.81761	4.9631	0.0678044
PFKP	-0.213784	9.70918	10.8841	0.016421
COPS7A	-0.10081	9.63099	5.39322	0.230165
SERPINI1	-0.0901566	9.68692	2.10775	0.321759
TMEM120B	0.0351103	9.62737	0.70741	0.668577
UBE4A	0.0805965	9.79857	1.55389	0.336268
NUCKS1	0.054157	9.89942	0.816744	0.469893
DNAJB6	0.446857	9.85746	45.593	4.90722e-08
NDUFC2	-0.0869742	9.62767	4.23689	0.29166
CDC42	-0.263061	9.79289	17.1585	0.00125187
SUMO2	0.0152311	9.70369	0.0569167	0.867144
RPL35	0.0141148	9.74831	0.0450121	0.872248
NDUFS8	-0.0507657	9.64143	1.07429	0.561908
NRXN3	-0.342724	10.1182	32.3393	1.42525e-08
LDHB	0.151861	9.8323	5.423	0.0621269
ISCA1	0.120488	9.68758	3.85772	0.191702
FAU	0.0435928	9.78271	0.419737	0.607837
RPL27	-0.110983	9.6931	3.22192	0.220906
PLD3	0.0391386	9.75725	0.354623	0.653586
CELF1	-0.152251	9.88529	6.71543	0.0406955
MPHOSPH10	0.105377	9.64972	4.01379	0.239719
NDUFB10	-0.0718038	9.65093	1.8746	0.421893
THYN1	0.184769	9.64198	14.3675	0.0351633
LINC00294	0.14775	9.61309	26.5998	0.0312872
C11orf58	0.00616716	9.76927	0.00915345	0.942741
HLTF	0.0813063	9.83861	1.65416	0.310916
PSMA1	-0.105306	9.70581	2.55929	0.242396
HRAS	0.0213366	9.61767	0.402959	0.776861
LRRC27	-0.0741162	9.63765	2.43552	0.391146
MRPL57	-0.0918189	9.63213	4.31821	0.277099
COX6A1	0.140823	9.67754	5.40737	0.127366
THRA	0.126793	9.74334	3.70642	0.154837
ZNF638	0.246188	10.3435	68.9477	2.62086e-06
ATP2B1	-0.0765292	10.0628	2.2212	0.22419
PPT1	-0.204839	9.67398	12.5126	0.0234593
RPS18	0.0190744	9.81437	0.0843452	0.815721
SCG5	-0.0469811	9.70441	0.547395	0.603968
HSP90B1	-0.0964191	9.78577	2.16092	0.248238
RPL19	0.00764435	9.77441	0.01302	0.92868
YWHAG	0.0871372	9.6945	1.90737	0.343174
PFDN4	0.196972	9.64486	15.1904	0.0261067
RNH1	-0.00346905	9.65089	0.00438969	0.969123
RNF11	-0.0576411	9.71103	0.802469	0.52236
YTHDF2	0.15728	9.68912	6.38952	0.0890414
KCNAB2	-0.0572283	9.61717	2.80779	0.447978
ACTB	-0.197722	10.0554	14.1678	0.00156619
RPL4	-0.145709	9.66759	6.49434	0.107706
ADD2	-0.239946	9.67085	16.8802	0.00778125
MRPL30	0.0353823	9.59869	10.3398	0.397608
TESC	-0.0631196	9.5998	21.1566	0.193938
SH3PXD2A	-0.234469	9.63525	25.3652	0.00605948
AP2M1	0.181037	9.68161	8.69597	0.0506926
ACBD7	-0.0865544	9.59712	90.8854	0.0315025
CLDND1	0.0482001	9.71074	0.543753	0.595919
PFDN2	-0.0676779	9.65185	1.62287	0.449822
BTF3	0.0466362	9.68598	0.564078	0.611673
AASDHPPT	0.156542	9.69957	6.14008	0.0895684
SGIP1	0.0929668	10.2961	6.88514	0.0804318
HSP90AA1	0.736972	10.2606	190.669	2.80832e-35
RPS5	0.0647718	9.70802	0.988576	0.47742
SNX3	0.336231	9.78091	24.1054	0.000125379
YWHAH	-0.04142	9.62056	1.27774	0.595549
UBC	0.101382	9.80661	2.28207	0.223402
TPI1	-0.0324488	9.66199	0.326374	0.720829
EEF1A1	-0.104105	9.95025	3.09998	0.13628
FAM13A	0.126594	10.0988	6.58016	0.0427277
PPP2R1A	-0.120619	9.70202	3.71703	0.181072
H2AFZ	-0.00589125	9.65351	0.0119401	0.947801
C1orf216	0.0621399	9.6041	11.0291	0.264837
GPR162	0.162012	9.67325	7.37081	0.0793397
NFU1	-0.183913	9.67148	10.1838	0.0421024
SNCB	0.0130076	9.59722	2.15788	0.727401
SELENOW	0.276995	9.8089	16.9495	0.00106239
ZNF252P	0.012509	9.6503	0.0550112	0.888897
TKT	-0.293683	9.67006	26.383	0.00107886
CFL1	0.180387	9.70582	7.71991	0.0501788
CHD5	0.101333	9.60053	61.2476	0.0219007
TCEAL1	0.314945	9.64295	40.8621	0.000329141
NPM1	0.0370718	9.72481	0.322385	0.679946
RPL11	-0.0182789	9.81685	0.080164	0.822169
MECR	-0.128442	9.64346	6.55035	0.143758
CSDE1	0.0790904	9.77245	1.49109	0.358767
TAF13	0.153295	9.62428	15.7502	0.0533573
CACUL1	0.0605355	9.7884	0.851786	0.474137
RPL22	-0.0398321	9.71132	0.388008	0.658846
TIMM8B	0.087526	9.61536	7.70791	0.2261
ZSWIM7	0.123098	9.65972	4.81066	0.17701
C9orf78	0.052529	9.63048	1.47671	0.529537
MRPL33	-0.0276289	9.68582	0.202071	0.762452
TRA2B	0.23619	9.83131	14.3532	0.00408329
AJAP1	0.463714	9.77707	43.2702	1.97816e-07
PAPSS1	0.00518694	9.86682	0.00682667	0.946454
RPL3	-0.0258696	9.80691	0.156376	0.752852
NCDN	-0.381378	9.65607	49.2825	1.70208e-05
DNM3	0.0837995	10.5632	13.4906	0.0589642
BCKDK	0.038986	9.6076	2.6435	0.535282
MRPL20	0.105814	9.6365	5.22426	0.218419
PITHD1	0.0331839	9.62931	0.616127	0.68943
ZNF429	0.133626	9.72044	4.06733	0.14162
RPS25	0.229017	9.75622	11.1738	0.00998391
UCHL1	0.145819	9.7127	4.89337	0.110996
POLR2G	-0.0408099	9.61923	1.31284	0.596192
UROS	-0.0532307	9.64712	1.09471	0.548877
SRP14	-0.157988	9.80727	5.96172	0.0512321
PEBP1	-0.0629063	9.84077	0.998284	0.424892
WIPF2	0.0057146	9.76596	0.00723797	0.947107
ESD	0.100845	9.67287	2.86838	0.273191
PRDX5	0.12884	9.65639	5.51944	0.155826
ATAD3A	0.017798	9.61655	0.300066	0.81066
ENO1	-0.0652156	9.79127	0.980963	0.433446
CCDC91	0.144106	10.0361	6.65506	0.0295094
RPS13	0.0319665	9.70982	0.239212	0.724881
BZW1	0.00329177	9.6998	0.00282283	0.971186
ACTG1	-0.16523	9.84044	6.64196	0.0342233
UQCRB	-0.0682062	9.73597	1.09241	0.439193
MGST3	-0.132141	9.7415	4.11433	0.129703
TOLLIP	0.138265	9.63998	8.34884	0.112606
RAB2A	-0.00384672	10.0539	0.00623395	0.952064
SDHB	0.0493626	9.67546	0.670507	0.590957
PSMD4	0.0137498	9.66932	0.0556922	0.880508
CYC1	0.0357339	9.63317	0.626379	0.673439
DPF1	0.145867	9.67754	5.73893	0.114397
PSMB4	0.207536	9.65388	14.906	0.0218993
BBS4	-0.10541	9.70353	2.74018	0.242609
HINT1	0.0232934	9.69243	0.140891	0.7992
RPS27	0.0112866	9.83712	0.0303045	0.887472
IRF3	-0.0226625	9.61261	0.610883	0.748258
PRDX6	0.252261	9.66853	18.624	0.00635201
GRM2	0.0036178	9.59316	68.6741	0.552755
MRPS14	0.182974	9.63431	16.311	0.0310347
ANKRD2	0.023658	9.59414	97.4805	0.127616
RTN1	0.0868654	10.0382	2.4076	0.185622
CYFIP2	0.0763047	9.95958	1.93599	0.280161
HSBP1	0.307011	9.69956	23.0793	0.00098731
PSAP	-0.0129754	9.95874	0.057383	0.852937
MAP1LC3B	0.300515	9.7124	20.9124	0.00117848
ST6GALNAC4	-0.0107948	9.60222	0.410476	0.840191
RTP1	0	9.59298	0	1
DYNC1LI1	0.0549501	9.7075	0.740327	0.546527
ARHGAP32	0.115992	10.1083	5.84001	0.0608838
SNRPN	0.0112573	9.83814	0.0291354	0.887676
SNX10	0.0141452	9.62952	0.103118	0.864996
HLA-B	0.0799272	9.72431	1.37714	0.375712
TMCC2	-0.0491541	9.61828	1.99516	0.519453
NDUFS5	-0.182354	9.70229	8.24207	0.0421513
RTL8C	-0.0684658	9.63169	2.41411	0.416654
APOE	-0.480623	9.80381	52.7172	1.12205e-09
BROX	-0.0525474	9.72692	0.663622	0.554988
TRIR	0.075482	9.6542	1.9789	0.403356
PPA1	0.08726	9.71298	1.78612	0.337858
GPRASP2	-0.0482015	9.61039	3.1185	0.479765
SLC29A3	-0.0905535	9.62804	4.61708	0.273345
PREPL	0.223565	9.79417	11.4406	0.00890271
PDCD2	0.0623446	9.63331	1.95988	0.462209
LIPA	-0.0861945	9.66998	2.12125	0.343434
CMAS	0.215565	9.65291	15.9207	0.0170716
TSC22D1	0.120545	10.2293	8.55538	0.0316894
CALM1	-0.164555	10.0297	10.1501	0.0104459
SPINT2	-0.290757	9.63303	43.1419	0.000585808
NDUFB1	0.0320592	9.66487	0.311899	0.725477
SH3BGRL3	-0.100141	9.60866	15.7064	0.131731
RPS7	-0.00326733	9.74864	0.00240629	0.970265
SPIN3	0.327885	9.74485	22.5756	0.000298605
FSTL5	0.213157	9.66508	12.1408	0.0205288
RAB1A	-0.0346113	9.81351	0.295105	0.671015
FAM204A	-0.0519794	9.75152	0.643742	0.550067
MEG3	0.220398	10.2051	26.5228	0.000141086
CRIP2	0.118213	9.61347	16.5207	0.0897191
SF3B3	-0.0467781	9.70637	0.552143	0.605107
PKM	-0.197865	9.75351	9.25884	0.0208633
PSMC5	0.118378	9.6524	4.90939	0.189098
RCN2	-0.112203	9.9976	4.7607	0.0922015
RPS14	-0.108915	9.78949	2.75882	0.189765
RABAC1	-0.0264396	9.6634	0.21607	0.771249
RPS17	0.0309676	9.59529	42.862	0.227736
SNCA	-0.061879	9.78905	0.791604	0.45858
NME4	0.0194994	9.62744	0.22148	0.812284
FBXL16	-0.0624826	9.62649	2.33135	0.445128
BEX4	-0.205084	9.70589	11.0071	0.0217441
CALM3	-0.146909	9.65761	7.24802	0.102348
ANXA2	0.0814989	9.60111	31.8931	0.0850471
BAIAP3	0.00577616	9.59561	1.01375	0.847565
PPP1R1B	-0.489758	9.63294	128.408	5.31391e-09
ELOB	0.0832036	9.68965	1.76323	0.365918
CNTNAP1	0.0691277	9.60864	7.89868	0.27954
SNN	0.0519554	9.62147	2.01388	0.506064
RPL12	-0.144869	9.70911	5.00687	0.105905
C16orf45	0.123119	9.93641	4.2113	0.0903838
FOXP4	-0.1199	9.65894	4.74583	0.183614
ALDOA	0.07369	9.72112	1.25076	0.415049
PSRC1	0.0441373	9.62065	1.52916	0.56934
HPCAL1	-0.253701	9.67695	17.7535	0.00487511
TRIAP1	-0.0132288	9.60009	0.923273	0.783502
FBXL19	-0.136063	9.63723	8.36704	0.114563
AP2S1	0.0196698	9.62068	0.294993	0.800308
MT1G	0.199329	9.64504	14.4925	0.0244479
PAFAH1B1	0.109905	10.0007	4.62325	0.106835
DGKZ	0.123007	9.62456	9.98478	0.123211
RABEP1	0.0222282	9.80308	0.118539	0.788621
SOX15	0.0968405	9.60602	20.6104	0.0984277
SRRM3	0.128252	9.65802	5.08656	0.158702
EIF1	0.144889	9.82102	4.84204	0.0785027
G6PC3	-0.0311951	9.62164	0.693907	0.692003
NSG2	-0.0979023	9.88232	2.55294	0.192111
NSF	-0.364275	9.96927	48.0177	4.69623e-08
GAP43	-0.341673	9.71869	26.4549	9.4406e-05
DDX5	0.243217	10.08	27.4554	0.000159813
KCND2	-0.0168027	10.7285	0.452054	0.671962
ARPC2	0.0721273	9.71773	1.23689	0.426125
RPL38	0.105542	9.73369	2.49936	0.2395
WBP2	0.10921	9.69882	2.97757	0.234788
QKI	0.0610933	10.8267	12.0596	0.10747
AC016588.2	0.0478975	9.59694	39.3366	0.154106
APP	0.0817477	10.3096	5.82467	0.119998
OAZ1	0.0949322	9.73345	2.06228	0.289709
RPS4X	-0.0160173	9.72412	0.0578484	0.857995
RTN4	0.0982985	10.0938	4.40147	0.115963
PPDPF	-0.10208	9.64168	4.21471	0.243374
ARF3	0.0725065	9.62675	3.21969	0.373643
THOP1	0.00117703	9.63266	0.000699229	0.988904
LGALS3	0.113792	9.60745	24.9176	0.061232
EEF2	-0.054981	9.73461	0.722297	0.533923
UBL5	0.193444	9.67131	10.8612	0.0362747
CLIP2	-0.211996	9.91752	13.0585	0.00300106
PIN1	0.141361	9.6381	8.94967	0.102189
RPL13A	0.00298885	9.81067	0.00213963	0.970943
AL078621.3	0.00743276	9.59491	2.75053	0.772008
RPS11	-0.0737018	9.74951	1.26967	0.39676
EPDR1	0.0139053	9.61289	0.225916	0.843688
ZNF814	0.104188	9.70273	2.6307	0.25598
ITGB1BP1	0.144686	9.68459	5.49738	0.117595
GPM6A	-0.0735123	10.5347	8.78468	0.0970531
VSNL1	-0.374739	9.62089	99.5491	1.91415e-06
SLC25A4	-0.0462682	9.65521	0.727966	0.607507
STMN1	0.242606	9.71228	13.8211	0.00852342
CALM2	-0.09918	9.91189	2.90443	0.172681
PIK3R1	-0.0647518	10.3034	3.38164	0.212063
PRKCB	-0.442967	9.80806	44.1893	1.8874e-08
OIP5-AS1	0.064612	9.80289	0.979734	0.437895
BCYRN1	0.0405185	9.59737	22.6818	0.263323
RPS27A	0.191692	9.81196	7.96577	0.0218143
DYSF	0.0164038	9.61531	0.257109	0.822433
TMSB10	-0.156193	9.67987	6.4384	0.0850242
MOB1A	0.241923	9.70719	14.2153	0.00889413
PNMA6A	-0.150534	9.60089	95.7392	0.00434361
IDS	-0.0388133	9.72788	0.347265	0.662925
HS6ST2	-0.284395	9.75392	16.2101	0.000813028
NDUFA1	0.0785342	9.6747	1.73538	0.393199
FAM199X	0.126715	9.73589	3.77707	0.157873
TCEAL7	0.0515521	9.62741	1.5992	0.5294
ARMCX1	0.0467504	9.62192	1.58092	0.551504
PCSK1N	0.00622408	9.80412	0.00890938	0.939982
RPL9P7	0.0439471	9.59754	25.0241	0.231731
HDHD3	-0.0094117	9.60647	0.180811	0.879188
CTSL	0.0237504	9.6376	0.261301	0.783524
YWHAZ	-0.0444932	9.78547	0.466614	0.596158
SNX16	0.123257	9.6574	4.94141	0.175118
FABP5	0.295175	9.68989	20.0587	0.00155674
ATP6V1H	0.127354	9.8005	3.606	0.129709
AC120036.4	0.0842195	9.60903	11.2458	0.189637
PPP2CB	0.377065	9.75356	30.2121	3.0183e-05
DPYSL2	0.177513	10.0743	13.4781	0.00571081
AC090114.1	0.0390931	9.59729	21.5448	0.277539
RUNDC3B	0.403898	9.67505	40.961	1.5331e-05
PCLO	-0.160663	9.75843	5.30868	0.0601911
CHCHD2	0.0743751	9.68526	1.46167	0.419033
STMN2	-0.0661102	9.61143	5.2916	0.342673
YKT6	0.0136427	9.6223	0.131535	0.862856
SOD2	0.133877	9.72515	4.02594	0.139457
GTF2H5	-0.0624895	9.63558	1.8043	0.466237
PCMT1	-0.0382331	9.71665	0.358073	0.670559
LMBRD1	-0.143823	9.88931	5.67373	0.0523826
RPL7L1	-0.0621688	9.68037	1.0934	0.495703
TUBB2A	-0.129997	9.64769	6.32542	0.142704
CPEB4	0.155563	10.3287	21.6942	0.00295911
ATP6V0E1	0.0078749	9.70989	0.015168	0.930777
PDP1	-0.177169	9.61977	24.3277	0.0229975
RPL10P9	0.397491	9.62321	120.487	8.57905e-08
SLC6A7	0.0108263	9.59351	83.2851	0.303797
CXCL14	-0.0742765	9.60502	12.1635	0.219003
UQCRQ	0.127193	9.63856	7.10133	0.142289
REEP5	-0.0530382	9.71086	0.702911	0.556309
AC093591.1	0.0144399	9.59729	2.56991	0.70051
GAR1	0.00441186	9.61169	0.0240403	0.949178
FAM47E	-0.000515289	9.60541	0.000594076	0.993132
SEL1L3	0.0152145	9.8626	0.0585222	0.844576
SSBP1	0.0595196	9.77422	0.836317	0.488154
LETM1	-0.16381	9.64424	10.6819	0.0624577
HES1	0.0140979	9.62502	0.116221	0.861395
NDUFB5	-0.0481226	9.67031	0.69024	0.597692
EIF2A	0.0125845	9.64487	0.0626157	0.886876
PHACTR1	-0.297683	9.9483	24.8356	1.42085e-05
LPP	-0.119659	10.351	12.6614	0.0163041
PODXL2	-0.0500602	9.71007	0.611048	0.57899
TPRA1	0.0221658	9.62593	0.301958	0.785006
LSAMP	-0.00525472	10.9585	0.0822895	0.880876
RPL14	-0.101347	9.73516	2.40858	0.249355
CHL1	0.152105	10.4492	27.4214	0.00158462
ZNF483	0.555542	9.84506	70.9247	3.81497e-11
XRCC6	0.0111868	9.70176	0.0315477	0.902277
CSNK1E	0.206092	9.73689	9.35334	0.0224526
LGALS1	0.271266	9.62345	51.5965	0.000446598
TIMP3	-0.153458	9.73321	5.21005	0.080306
DRG1	-0.098345	9.66037	3.14386	0.276584
NOL4L	-0.140544	9.69189	5.07498	0.120476
FTH1P10	-0.00465103	9.60131	0.0819723	0.927594
MTERF4	-0.00974718	9.63676	0.044839	0.909947
COPS9	0.0386015	9.66681	0.437213	0.672959
PTMA	-0.197418	9.91363	11.0523	0.00599521
SP100	-0.108143	9.61805	9.30368	0.156987
SERPINE2	-0.143536	10.0242	7.93152	0.0266237
C2orf69	0.169293	9.66584	8.5395	0.0655311
HIBCH	0.778284	10.1824	212.88	1.54034e-34
KIF5C	-0.0143743	9.91559	0.0601608	0.844172
CCDC115	0.0361361	9.61059	1.80378	0.591663
RPL31	-0.0539038	9.68283	0.779654	0.554867
MGAT4A	-0.253084	9.78893	15.162	0.00201664
COX5B	0.0893268	9.70051	1.96194	0.330079
BCAP31	0.0718507	9.63476	2.44855	0.399997
RPL13AP25	0.0405188	9.59737	21.4704	0.263323
HCN1	0.0240649	9.6183	0.464086	0.750896
NUDT4	0.157947	9.67241	7.15744	0.0869846
TIMM13	0.069421	9.63045	2.61843	0.405654
LGMN	-0.124728	9.63688	6.97091	0.147593
HIKESHI	0.194958	9.71725	8.9576	0.033278
GRIA3	-0.0943812	10.0881	4.11911	0.124482
SYT17	-0.0502182	9.92704	0.732521	0.485395
STARD3	-0.100751	9.63861	4.58095	0.245121
MTCH1	0.382277	9.71462	34.4331	4.03282e-05
PAPOLG	0.126922	9.68749	4.18695	0.169233
AP003170.4	0.00196117	9.59386	0.77616	0.911634
EMC9	0.0177766	9.60687	0.602075	0.774698
TUFM	0.0127439	9.66219	0.0512891	0.888643
VBP1	0.228063	9.66296	16.2758	0.013029
PSMB5	0.137669	9.64807	7.05286	0.123275
SBNO1	0.285816	9.77421	18.337	0.00113445
AC064799.1	-0.000841851	9.61293	0.000773392	0.990513
HIP1R	0.0361802	10.1614	0.767376	0.537107
CHPT1	0.318879	9.83736	22.5737	0.000110339
POLR2D	-0.0745672	9.62437	3.60757	0.35528
DNAJC4	-0.0998978	9.60897	15.159	0.135191
AL118558.4	0.0108263	9.59351	86.4145	0.303796
GLRX5	-0.162446	9.6363	12.3232	0.0585957
UBE2B	0.610216	9.88659	88.0277	5.13224e-14
AL035071.1	0.0553976	9.6058	6.79126	0.350678
B4GALNT1	0.0175873	9.60249	1.04338	0.742019
RPS29	0.0484846	9.77839	0.542687	0.57013
KIF5A	-0.115742	9.69029	3.4471	0.202081
HCFC1	0.10292	9.61792	9.34119	0.168131
RPL21	-0.0296201	9.82833	0.212532	0.711907
KLRG1	0.0503075	9.68501	0.667652	0.584075
PIANP	0.0514923	9.64606	1.01182	0.561954
NDUFS4	-0.0930437	9.81742	2.11382	0.248636
ZFP28	0.145271	9.62438	13.8362	0.0676083
NRGN	-0.369394	9.62179	95.2726	3.1448e-06
CCDC82	0.0905484	9.7515	1.92474	0.304247
GMFB	0.127515	9.6423	6.65063	0.146725
DYNLRB1	-0.114075	9.7249	3.08304	0.198444
HNRNPC	0.0344999	10.1208	0.599666	0.56931
AC113935.1	0.102587	9.65063	3.66988	0.253269
HSPA8	0.150541	9.78943	4.89531	0.0774309
SCAF1	0.121112	9.62953	8.14296	0.143559
RAD54L2	-0.139075	9.76181	4.5139	0.103228
EPHX1	0.0032782	9.65824	0.00348917	0.971145
ISCU	0.0779832	9.64434	2.4271	0.377731
C2CD2L	0.0577333	9.60706	6.51926	0.348459
BRSK1	0.0398855	9.65261	0.567105	0.657616
NSG1	-0.00176657	9.6067	0.00596632	0.97733
VAMP2	0.254591	9.75328	14.0145	0.00438419
TPM3	-0.212828	9.65149	16.901	0.0167459
GSTM3	0.000916066	9.62972	0.000456616	0.991226
SLIT1	0.224456	9.75087	10.3057	0.0119592
EIF1B	0.215084	9.69212	11.6684	0.0204591
TTC3	0.0807872	10.2393	4.99145	0.144828
RPL18	0.182299	9.86159	7.96261	0.0212578
CCT3	0.375968	9.79962	30.8838	1.33792e-05
CSNK2B	0.166321	9.62178	20.3067	0.0314476
ASPHD1	-0.0680545	9.60448	11.3758	0.251546
PCSK2	0.100817	9.69468	2.25048	0.273189
ZNF271P	0.0336717	9.69981	0.278016	0.712475
HIGD1A	-0.0125954	9.60706	0.297481	0.841417
NDUFB8	0.00123409	9.63868	0.00066051	0.988654
TIPIN	-0.217114	9.6453	18.5961	0.0135814
AFG3L2	-0.0919824	9.67548	2.47327	0.31246
RPL9	-0.0321326	9.78302	0.237682	0.703048
CRYAB	0.74169	9.7716	92.5406	8.22763e-16
NDUFS2	0.129674	9.67988	4.52485	0.160264
SARAF	0.0922897	9.83152	2.0426	0.254303
MORF4L1	0.0533934	9.8284	0.737679	0.509246
S100A6	0.257154	9.66282	19.8268	0.00514593
RPL13AP5	0.0662198	9.59949	29.6942	0.122937
AC024293.1	0.0168126	9.6048	0.681613	0.773333
CCK	0.0431981	9.5983	17.7039	0.279273
YAF2	0.258476	10.0081	21.2142	0.000175707
USP14	0.060095	9.76095	0.830145	0.48999
ERI3	-0.145742	9.84681	5.5367	0.060493
RSU1	-0.275786	9.72076	17.6698	0.00168791
SARS	-0.0134386	9.69772	0.0461347	0.882783
RPS21	0.186685	9.72545	7.48238	0.0401764
AKR1A1	-0.0661732	9.63783	1.96518	0.444231
APH1A	-0.0289654	9.62134	0.61455	0.712234
CDC5L	-0.016094	9.71561	0.0634818	0.858254
PMVK	0.122529	9.6414	6.27652	0.161918
ATP6V0B	0.0578244	9.69075	0.840908	0.528943
SNX7	-0.145377	9.80448	5.17178	0.0740883
ERCC1	0.0280079	9.64679	0.296096	0.752745
RSL1D1	0.187125	9.63706	16.3544	0.0295349
ARFIP2	0.120906	9.61479	15.8574	0.089423
OSCP1	0.0122762	9.60657	0.300439	0.842272
PGAM1	0.152921	9.66954	6.69804	0.096897
HSPA9	0.556467	9.7725	66.5467	7.421e-10
TOP2B	0.0782982	9.90158	1.76982	0.296352
RTN4R	-0.0204706	9.59554	11.3173	0.510934
PPP1R12A	0.110592	10.2321	8.0969	0.0479896
OPTN	-0.100198	9.63613	4.58335	0.243554
ADCK1	-0.138269	9.66459	5.93398	0.126471
CKB	0.00153241	9.81926	0.000548096	0.984958
PHKG2	-0.0210076	9.61576	0.430629	0.776132
TOMM20	-0.0716945	9.70742	1.31053	0.42684
PRAF2	-0.00400311	9.60522	0.036777	0.946459
HK1	-0.0981772	9.6648	2.87319	0.279009
TRUB1	0.075313	9.68826	1.46669	0.413014
TALDO1	-0.0108032	9.68065	0.0323606	0.906071
LAMA4	-0.197273	9.85771	10.4725	0.00972852
CDC42SE2	-0.119528	9.81763	3.3702	0.137175
SUPT16H	0.210039	9.6932	11.0392	0.0235304
MRPL32	-0.117199	9.63348	6.87938	0.167911
SAP18	0.165504	9.65906	8.63139	0.0696495
VDAC2	0.263432	9.71698	16.2267	0.00423812
SPCS1	-0.128496	9.6361	7.8069	0.134604
RPS24	-0.0773479	9.8136	1.35264	0.340358
PACSIN2	-0.395441	9.74864	37.8674	2.93886e-06
AARS	0.14345	9.70195	4.94357	0.119036
CCDC186	0.0369192	9.71992	0.315584	0.682364
TIGD5	0.00782614	9.60632	0.122955	0.898504
GREM2	0.0458607	9.6005	10.6797	0.331335
BORCS8	-0.00719648	9.60505	0.123651	0.903492
CHGA	0.00464536	9.5968	0.319541	0.897167
SLC7A8	-0.130631	9.61299	18.2251	0.0691912
GTF2A2	0.0858724	9.64604	2.88295	0.33366
AC245140.2	-0.0455593	9.59659	31.3489	0.219437
SCRN1	-0.0343156	9.77817	0.281061	0.685405
PHF21A	0.0939754	10.1262	4.1992	0.122118
OTUB1	0.0929805	9.62603	5.39292	0.250755
BORCS7	-0.0352045	9.62483	0.808075	0.663137
SYNGR1	-0.0418571	9.71063	0.426146	0.642781
RPS15A	0.0536706	9.68381	0.730399	0.559304
NUS1	-0.185131	9.68302	9.56086	0.0407305
LMAN2	0.018497	9.63583	0.162572	0.829388
CA10	-0.155543	10.5938	31.9785	0.000235524
GNAS	0.18154	10.0546	12.6673	0.00550275
SCAMP5	0.0514553	9.71224	0.61148	0.57104
KIF1A	0.132724	9.7213	4.16246	0.144044
NR2F6	0.092728	9.61796	7.47158	0.215301
RPL28	0.110172	9.79688	2.71609	0.190864
NME3	0.266125	9.71529	17.1598	0.00390869
RPS2	0.133131	9.82042	4.13665	0.105742
SYNGR3	-0.099198	9.59649	153.386	0.00875893
ZNF385A	0.0655538	9.60027	25.4065	0.15012
METTL9	-0.0913978	9.68056	2.33068	0.315618
MCOLN1	0.0629968	9.61979	3.21966	0.411616
TSC1	0.236622	9.80244	13.1579	0.0052847
TERF2IP	0.0417544	9.79113	0.410474	0.619827
ACTR2	-0.00979986	9.72506	0.0228454	0.912803
NLRP1	-0.137366	9.65622	6.51986	0.126241
PFN1	0.214332	9.63143	24.3736	0.0100503
FAM49A	-0.0842031	9.78796	1.65769	0.312685
C1QBP	0.161126	9.63394	13.1273	0.0573392
LDLR	0.0441979	9.63018	1.02579	0.59628
Z74021.1	0.00722663	9.59333	70.226	0.401139
TXNDC17	0.0663422	9.61315	5.14231	0.344146
KRT10	0.195015	9.65259	13.2823	0.0307921
ZFP82	-0.0164041	9.68553	0.0711298	0.857696
TUBG1	0.0443502	9.60473	4.97969	0.440931
SUV39H1	-0.002543	9.59799	0.0629992	0.950608
CACYBP	0.748033	9.7495	110.886	1.55157e-15
PRMT1	0.0557671	9.64981	1.11962	0.533468
HDAC5	0.049383	9.69556	0.609792	0.589972
TCEAL5	-0.10688	9.61412	11.8467	0.142573
SEC62	0.0357211	9.80324	0.298103	0.666952
MYDGF	0.0406773	9.64544	0.639289	0.646275
NAA10	0.115673	9.62476	8.69155	0.148146
FXYD6	0.0888883	9.74004	1.69769	0.31839
ZNF470	0.00752716	9.62557	0.0348307	0.926046
GAS7	-0.215821	9.64775	16.9994	0.0146329
METTL23	0.215438	9.62327	32.7751	0.00569221
ITM2B	0.084765	9.98416	2.29216	0.219545
CES4A	-0.13344	9.63009	9.64516	0.110604
IER3IP1	0.0423168	9.61253	2.13349	0.543953
RPL10	0.138402	9.88012	4.78458	0.0730614
GCA	-0.142151	9.6112	26.1137	0.0422338
ST8SIA3	-0.0127028	9.659	0.0506198	0.888536
ABHD17A	-0.00565207	9.64202	0.0133484	0.948632
CHML	0.0186601	9.60176	1.35753	0.717802
LSM7	0.196607	9.6618	12.0321	0.0319093
RPL36	0.146772	9.74998	4.63839	0.0980998
DYRK1A	0.134865	10.073	7.37977	0.0349955
ILF3-AS1	-0.00471287	9.63029	0.011959	0.955047
ASNA1	0.154494	9.61399	27.4426	0.0264636
HSDL1	0.0491329	9.6502	0.889467	0.583504
IER2	0.0936148	9.61072	12.3896	0.159314
VSTM2B	0.117661	9.78705	2.99997	0.167221
COX7A2L	-0.0453352	9.65619	0.702666	0.615234
C19orf53	-0.0364354	9.63398	0.640757	0.668858
TECR	0.0849714	9.695	1.78814	0.355145
DDA1	-0.0177829	9.61944	0.252677	0.817469
RPL18A	0.0537638	9.75413	0.636448	0.539391
SYMPK	-0.146594	9.74091	5.14841	0.0925331
TMEM59L	0.208094	9.67924	11.4967	0.024858
TRIM37	-0.036708	9.77419	0.310536	0.666055
PPP1R37	0.104512	9.60563	26.59	0.069432
ANKMY2	0.225051	9.7312	11.4336	0.0132619
PNMA8A	-0.0805429	9.62942	3.64537	0.333666
PNMA8C	-0.100376	9.60864	15.3945	0.130734
TMEM160	0.0205719	9.62383	0.279754	0.796988
FTL	-0.0359344	10.0099	0.406373	0.588494
C2orf68	-0.126597	9.67444	4.67269	0.163506
SIK3	0.0748605	10.394	6.41478	0.130384
SLC17A7	0.021572	9.59404	96.4036	0.145858
GTF2I	0.253476	10.1256	36.2617	4.37897e-05
KLK7	0.00722656	9.59333	81.0432	0.401132
TAPBP	-0.220649	9.73267	12.2751	0.0114663
PEA15	0.325117	9.70617	24.8326	0.000478723
COX4I1	-0.139966	9.70967	4.77366	0.118245
SUPT7L	0.138134	9.64113	8.02656	0.114449
RPL9P9	0.0905521	9.60858	13.5494	0.152891
URI1	-0.057465	9.96232	1.04373	0.407645
C1D	-0.0615419	9.67066	1.14011	0.499475
WASH6P	0.132989	9.6064	38.6782	0.022129
RPL39	0.116361	9.71699	3.01102	0.201061
COX7B	0.106872	9.6888	2.98098	0.246345
SYN1	-0.098448	9.64821	3.43461	0.267987
SLC25A6	-0.0436741	9.66125	0.618101	0.630145
ASB6	-0.0107342	9.6179	0.0994026	0.887292
FRRS1L	-0.343842	9.69706	30.4516	0.000110165
DIRAS2	0.045995	9.63232	1.03395	0.585818
RORB	0.0387061	9.61855	1.21977	0.610068
WASHC1	-0.0919394	9.65797	2.82718	0.30808
ENY2	0.175155	9.68234	8.43344	0.05861
PLGRKT	-0.128013	9.68281	4.18353	0.158733
NEFM	-0.0377809	9.60035	6.85228	0.445556
RHEB	0.106313	9.73814	2.64541	0.234266
FAM3C	-0.162831	9.72729	6.41467	0.0647149
RPS3AP26	-0.0670161	9.59509	159.326	0.0259571
RPS3AP25	-0.0434241	9.59702	23.4164	0.262938
BEX3	-0.0564856	9.74334	0.769418	0.519264
APTR	0.0957806	9.66846	2.66757	0.296801
C7orf50	-0.238237	9.68772	15.6342	0.00813047
PRKAR1B	-0.120097	9.76262	3.35117	0.15979
C6orf203	0.0599198	9.62698	2.15931	0.463261
HMGN3	0.0915574	9.74691	1.88641	0.301086
BEND6	-0.256534	9.71738	15.36	0.00363806
CUTA	0.0900657	9.64979	2.91117	0.314899
QRSL1	-0.0885399	9.68397	2.11824	0.330879
MCUR1	-0.124619	9.63512	7.31629	0.145265
LYRM4	-0.210206	9.8147	10.3164	0.00856071
ECI2	0.153815	9.62098	18.7576	0.0451728
AC140125.2	-0.00680645	9.59421	4.8791	0.75371
PDLIM7	0.00022689	9.60047	0.000252085	0.996294
KIAA1191	-0.0827821	9.6303	3.7085	0.322714
AC139491.1	0.0200763	9.59554	13.0953	0.481183
LNPEP	-0.174583	9.77576	7.31096	0.0372068
KIF2A	-0.0318211	9.96987	0.343616	0.645038
MAP9	-0.0760211	9.63908	2.55805	0.381415
RPS3A	-0.0778328	9.75016	1.35142	0.370346
CCNI	0.133197	9.8454	4.37857	0.0963349
PGRMC1	-0.317335	9.78938	25.0564	9.73552e-05
TMEM165	-0.0540098	9.86472	0.693456	0.482269
OPA1	0.270256	9.84143	17.0045	0.000935584
PFN2	-0.0150597	9.67518	0.0641114	0.869257
ATP1B3	0.0395135	9.73996	0.357878	0.65596
ZCCHC10	0.0773833	9.65311	2.04432	0.390769
COX17	0.136611	9.65702	6.16517	0.132818
ZNF786	-0.131436	9.62084	12.7212	0.0943273
PSMD6	0.0709734	9.65255	1.78741	0.430673
SEC13	-0.141615	9.66541	6.36031	0.117653
BRK1	0.117251	9.66155	4.31032	0.199329
CRELD1	0.264489	9.69097	17.2381	0.00450277
MLC1	0.0766921	9.61423	6.41444	0.281624
CD99L2	-0.0940455	9.74114	2.02191	0.282664
SNU13	-0.034798	9.64746	0.461536	0.695519
UQCR10	0.00542866	9.67529	0.00821207	0.952737
XBP1	-0.169174	9.62725	16.708	0.0399128
S100B	-0.426352	9.87021	52.3244	6.80638e-09
PIGP	0.059705	9.65166	1.26028	0.50657
SLC13A3	-0.0748258	9.66412	1.68662	0.409713
RBM39	-0.00788747	10.023	0.0257913	0.904648
MAP1LC3A	0.0412403	9.63374	0.836193	0.62761
CST3	0.0417713	9.98601	0.475743	0.542329
MORF4L2	0.361204	9.80299	29.8894	2.6211e-05
COPS7B	-0.0580147	9.65937	1.11783	0.521384
SRI	0.145661	9.75836	4.81406	0.0978724
PPP2R2C	-0.366527	9.69136	35.0291	3.8471e-05
MZT2A	-0.0782555	9.64924	2.21762	0.379855
HSPE1	0.865886	9.7651	138.905	2.48055e-20
MZT2B	0.210657	9.67535	12.1401	0.0229823
RMND5A	0.0955119	9.71659	2.13663	0.29329
PPP3R1	-0.0958315	9.61433	9.51772	0.189487
MAPKAPK5-AS1	-0.0210472	9.62076	0.33079	0.787476
ATP2B1-AS1	-0.0871417	9.6234	5.03533	0.276699
SEZ6L2	0.127249	9.64141	6.63124	0.146355
RND1	-0.0283073	9.60664	1.5659	0.650721
RPL41	-0.0265297	9.86655	0.170649	0.730297
IGSF21	-0.357694	10.0296	53.4173	1.33071e-08
MAGEH1	0.120989	9.64679	5.46881	0.174144
RPL5	-0.031261	9.76509	0.221387	0.716025
SYT10	0.0269787	9.59872	5.76067	0.524122
ST13	0.726476	9.89527	117.88	4.91344e-19
EVL	-0.253961	9.83016	15.9778	0.00116988
SECISBP2L	0.253439	9.8446	15.2171	0.00181077
ENO2	-0.0245025	9.65163	0.204316	0.784625
AC215219.1	0.1943	9.66382	11.8274	0.0343677
APLP2	0.0708973	9.80986	1.21568	0.391346
MAOB	-0.0724089	9.67718	1.361	0.427172
RPA3	0.0482355	9.60381	6.71664	0.384992
THY1	-0.2342	9.70027	13.604	0.00887007
ISY1	0.0184151	9.60567	0.758514	0.758832
ATP1B1	-0.189063	9.76199	7.97736	0.0260255
WIPF3	-0.0513117	9.61366	2.81079	0.476191
CHORDC1	1.05226	9.99101	232.691	6.44825e-42
HACD3	-0.0323305	9.77521	0.25138	0.703677
COA5	0.0282895	9.64369	0.3171	0.748414
PLEKHB1	-0.0732192	9.69699	1.38681	0.419809
TMEM147	-0.0943368	9.62942	4.94364	0.257563
PEX16	-0.0313398	9.61059	1.33282	0.64623
GSTP1	0.146275	9.6691	6.21586	0.112086
AQP4	0.0913095	9.70415	1.82835	0.318653
BDNF	-0.0459553	9.59537	63.0368	0.14047
2022-09-04	-0.062065	9.62886	2.14045	0.454758
AC116533.1	-0.0657385	9.60117	16.6163	0.20818
PSMB7	0.00181089	9.73318	0.000772792	0.983753
PPCS	0.122732	9.61819	13.5287	0.100327
ATP6V0D1	0.0221018	9.64824	0.179996	0.804281
SYT1	-0.192912	9.69671	8.5614	0.0319927
DCAF10	-0.00425444	9.65856	0.00609843	0.962551
DKK3	-0.396537	9.71561	40.0706	5.63417e-06
NUDC	0.342754	9.69956	28.6264	0.000243811
EIF4A2	0.356301	9.77803	28.7811	5.24898e-05
RPLP2	0.0707044	9.75277	1.10091	0.420981
CEND1	-0.0910436	9.63725	3.64692	0.291376
INPP4A	-0.000250667	9.77887	1.44502e-05	0.997621
PRPSAP2	-0.0865801	9.731	1.77883	0.327576
TRMT112	0.187654	9.62993	19.577	0.0231494
ADPRHL2	0.334518	9.63703	53.3289	8.64305e-05
RPL34	-0.0325113	9.79915	0.227105	0.694618
PLGLB1	0.0949049	9.62744	5.29839	0.245844
SSU72	-0.0110282	9.67861	0.0342231	0.904126
SLC2A11	0.0535929	9.61557	2.8075	0.462608
CHCHD5	0.0904517	9.60973	12.3493	0.164926
PSMB2	0.0409322	9.688	0.44109	0.655645
SLU7	0.129671	9.63563	7.97924	0.129748
NCSTN	0.10259	9.64951	3.83525	0.252134
KIDINS220	0.190919	10.0308	14.5159	0.0043251
CHD4	-0.0259081	9.71649	0.166797	0.773409
CCNY	-0.0339273	10.0873	0.504555	0.583708
TBR1	0.0108263	9.59351	86.4408	0.303796
SVBP	0.00946121	9.6005	0.445428	0.845576
SMIM20	0.0537942	9.64455	1.14714	0.543021
RPLP1	0.0667468	9.93585	1.19599	0.355771
GTF2IP12	3.36364e-05	9.63669	5.29007e-07	0.99969
DENND6B	-0.0564041	9.6078	5.21775	0.383585
NCL	-0.0437	9.68623	0.525214	0.632197
WASH2P	0.137881	9.61914	15.9308	0.067356
MTFR1L	0.0817893	9.63129	3.56731	0.329312
NT5DC1	-0.0838124	9.6813	1.83872	0.357672
COL9A3	-0.14285	9.70983	5.19833	0.110732
PSMA4	-0.0305319	9.64747	0.354046	0.731338
NACA	0.0801385	9.80411	1.44117	0.33609
C4orf48	-0.0265431	9.6572	0.230309	0.769004
TYROBP	-0.00722207	9.60195	0.185552	0.891239
SEC31A	0.0457619	9.84753	0.537556	0.563199
PLEKHB2	0.0135637	9.66769	0.054605	0.881998
RPL29	-0.0232065	9.74574	0.1215	0.791329
GALNT18	0.23534	9.63562	23.8781	0.00573072
ANAPC11	0.129982	9.64715	6.36096	0.144679
PHACTR3	-0.0131975	10.3934	0.167917	0.787466
ATP9A	-0.0830207	9.87615	1.88469	0.272661
RPS3	-0.0236893	9.76332	0.127765	0.783325
WASH7P	0.132242	9.68354	4.6773	0.152304
GPN2	0.188313	9.6152	39.224	0.00747103
GUK1	-0.0497437	9.67034	0.732708	0.585381
LDHA	-0.127529	9.63386	7.83146	0.134087
NEDD4L	-0.0190416	9.67411	0.0935025	0.835037
ACOT7	0.197645	9.68966	9.96775	0.0330512
CLSTN1	-0.0354296	9.88595	0.353806	0.637864
ATP1A2	-0.228954	9.97709	18.1563	0.000646435
PRKACB	0.143106	10.2121	12.893	0.0120973
VPS26B	0.0647985	9.67303	1.20311	0.480551
RGS7	-0.0866163	10.3134	5.09102	0.091812
DDX20	0.0608571	9.63399	1.79032	0.474447
POMP	-0.0173336	9.67744	0.0855481	0.849765
MRPL12	0.085604	9.60296	25.9471	0.101065
STK25	-0.134347	9.64064	7.77546	0.123278
PPAN	0.00515381	9.59715	0.338878	0.890444
SYT11	-0.271074	9.90137	23.1565	0.000174445
MACROD2	-0.0862597	10.3564	4.2723	0.0833786
TIMM10B	0.0314434	9.62919	0.57353	0.704758
CA11	-0.112271	9.60871	19.0414	0.0919859
COX6C	0.0768454	9.73776	1.36095	0.388823
AL445433.1	0.0285907	9.59834	7.15745	0.484601
C1orf61	-0.639567	10.0858	202.321	3.90139e-28
LGALS8	0.00663149	9.62908	0.0247004	0.936319
RAN	0.0596037	9.66996	1.0328	0.515765
MFN2	0.164371	9.64851	9.99737	0.0661045
PCDH9	0.0344423	11.0312	3.45821	0.310386
LINGO1	-0.0214228	9.906	0.110756	0.771621
CREM	-0.224326	9.92863	13.6197	0.00146818
KCNJ6	-0.103633	9.6561	3.31212	0.249332
EIF4G3	-0.0120787	10.3973	0.199555	0.804744
ARF1	-0.121814	9.70896	3.69134	0.174805
RPL24	-0.0489118	9.79515	0.55955	0.555829
HPCA	-0.188118	9.62772	20.3984	0.0226939
CIRBP	-0.428141	9.76725	48.0822	2.21384e-07
MYO10	-0.049179	9.97967	0.815952	0.471418
MDH1	0.00348802	9.65355	0.00431203	0.969098
HMGB1	0.376689	10.1927	63.051	2.71998e-10
C6orf106	-0.183776	9.67886	9.3327	0.0423606
FO538757.1	0.00338869	9.60873	0.0181175	0.95859
GDI1	0.218934	9.70785	11.5989	0.0176702
SLAIN1	0.0957798	10.2657	5.50038	0.0783654
SLITRK5	0.162415	9.80802	6.09107	0.0522534
CDC16	0.317264	9.73699	22.9713	0.000502414
CAMK2B	-0.235601	9.67111	16.0224	0.00899118
ASCC1	0.0758991	9.77254	1.31058	0.378291
NDRG2	0.201491	9.81071	9.6381	0.0161704
EAPP	0.189954	9.67961	9.8091	0.040373
RPL36AL	0.123885	9.67065	4.4134	0.178337
RAB15	-0.0607293	9.61205	4.36766	0.387948
GPI	-0.126237	9.78238	3.64733	0.130905
SMARCD3	-0.157615	9.67331	7.23042	0.0821335
PCNX1	0.0981623	10.0634	4.19512	0.126425
CABP1	-0.20614	9.6912	10.8481	0.022149
FASN	0.0494615	9.62551	1.5028	0.540812
SLC48A1	-0.404529	9.71136	42.9461	3.88014e-06
APBA2	-0.0557364	9.97569	0.991315	0.415812
RAB11A	-0.060534	9.67791	1.02363	0.507148
GOLGA8A	0.241115	10.0095	20.5342	0.000445349
SRSF8	-0.00103863	9.63327	0.000537743	0.990237
MAP1A	0.145938	9.69561	5.18412	0.113751
PCBP2	0.137474	9.76381	4.47051	0.115945
SERF2	0.1609	9.72191	5.73877	0.0771228
NBR1	-0.0685925	9.73067	1.13471	0.438836
SCG3	-0.08502	9.86364	1.84172	0.267685
SLC8A1-AS1	0.0494558	9.69158	0.559914	0.58994
RTL10	-0.0720871	9.61184	6.24753	0.304439
ARPP19	-0.321707	9.73084	25.6411	0.000205934
RNF135	0.0336468	9.6347	0.536469	0.69362
COX5A	-0.106553	9.6403	4.82991	0.221409
MBTPS1	0.160924	9.83593	6.56619	0.047416
TSPAN3	-0.0247573	9.83917	0.161112	0.754868
SH3GL3	0.0563819	9.74469	0.599282	0.52379
OCIAD1	0.120649	9.849	3.87498	0.129975
MESP1	-0.0553285	9.60667	5.84525	0.379565
SEC14L1	-0.164575	9.74534	6.32962	0.057441
SFT2D1	0.0492308	9.69004	0.646251	0.591769
HCFC1R1	0.0815185	9.62095	4.97525	0.292871
EIF1AX	0.0882548	9.72282	1.86915	0.328949
HES6	0.187771	9.6484	12.9482	0.035756
TCF25	0.450629	9.85837	48.9951	3.72279e-08
YPEL3	0.261793	9.71349	15.8777	0.00456276
NDUFAF2	-0.0763679	9.86924	1.36741	0.316929
ATP1B2	-0.12516	9.88376	3.86318	0.0939861
HNRNPL	-0.0567509	9.74265	0.754415	0.517587
COPRS	0.123092	9.62599	9.41948	0.127344
UROD	0.101942	9.61087	14.5196	0.125597
DHX36	0.0726674	9.88386	1.47267	0.34118
KRT222	0.0165607	9.59537	10.2416	0.550703
PSMD8	-0.0393585	9.64256	0.640668	0.654066
USP39	-0.053429	9.65246	1.00822	0.551383
IFIT1	0.0204185	9.64011	0.176726	0.814934
ADAM11	-0.0678118	9.59624	80.5184	0.0606823
RAB40B	0.108323	9.68616	2.9607	0.240212
CHCHD10	0.0407663	9.66026	0.526903	0.653996
TBCB	0.0579769	9.65166	1.19083	0.518924
CTXN1	-0.144399	9.62431	13.1231	0.0737841
MRPL34	0.00109318	9.62336	0.000817662	0.989064
AC074033.1	0	9.59298	0	1
U2AF1L4	0.0936361	9.61201	11.343	0.17017
NUMBL	0.107306	9.63291	5.64433	0.204144
ATP1A3	0.0813005	9.61243	8.00941	0.23879
SNRPD2	0.0542683	9.62352	1.97106	0.495234
MCRS1	0.00736549	9.61328	0.0604159	0.917428
HS6ST3	-0.210426	10.4234	31.5539	7.18738e-06
ATP6V1D	0.112135	9.65185	4.44342	0.212955
FAM213A	-0.0219027	9.75112	0.112145	0.801785
TFPT	-0.0101748	9.61149	0.128789	0.883023
GHITM	0.0264256	9.64023	0.296351	0.762036
SMARCB1	0.00140826	9.67364	0.000577626	0.987725
DTNB	-0.157068	9.97243	7.9472	0.0208026
FUNDC2	-0.108647	9.6481	4.4203	0.221274
LINC01278	0.160054	9.95596	7.39799	0.0254002
ATP6AP2	-0.163297	9.69555	7.10226	0.0702692
GPM6B	-0.023842	10.4113	0.58817	0.621746
TMEM141	-0.0511069	9.60162	9.90471	0.33521
OLFM1	-0.136083	9.67651	5.05623	0.134025
RPL7A	0.0338762	9.80837	0.267585	0.681439
TUSC1	0.0791527	9.60261	23.8288	0.124973
ZNF7	0.138522	9.6312	10.2712	0.097432
BAALC	0.00207832	9.77788	0.000948288	0.980447
C8orf37	0.104446	9.6089	18.3388	0.100152
C8orf59	0.445273	9.66595	60.5121	1.53754e-06
RPL7	0.0255927	9.72178	0.151652	0.776126
PSD3	0.0269068	10.2686	0.555447	0.617208
MICU3	-0.115994	9.85471	3.51157	0.132975
NDUFB2	0.100691	9.70028	2.50214	0.272728
AKR1B1	0.117531	9.62291	9.68398	0.135229
ZC3HC1	-0.0014367	9.64691	0.000768726	0.987102
PSIP1	0.172546	9.94651	9.36721	0.0171422
VGF	0.214466	9.61696	39.6781	0.00285957
PPP1R9A	-0.105917	10.1982	6.82864	0.0583784
LIMK1	0.0120895	9.62618	0.0882762	0.881982
2022-09-07	0.163938	10.1099	11.7135	0.00836077
RPL21P75	-0.017579	9.59369	79.6532	0.316625
PHF14	0.188502	10.2432	26.1181	0.000760976
SASH1	0.0196217	10.13	0.182927	0.743919
CDC40	-0.0617613	9.76618	0.903583	0.470481
MAP3K7	0.101186	9.81538	2.50222	0.219871
FIS1	0.00977393	9.66762	0.0287192	0.914809
TBCC	0.0141602	9.60466	0.501059	0.807618
RUFY1	-0.0347055	9.69919	0.307306	0.702681
PJA2	0.0631633	9.89824	1.13154	0.400385
COX7C	-0.00796597	9.71517	0.0150862	0.92962
SKAP2	-0.147664	9.61632	18.4765	0.0493893
RPL37	0.00974113	9.79465	0.0208183	0.907199
SPARCL1	-0.049638	10.1359	1.15869	0.402335
HOPX	0.0323063	9.61286	1.20915	0.645663
PAICS	-0.168851	9.68136	7.94161	0.0623626
SST	0.0258229	9.60339	1.92487	0.640176
ZBTB38	-0.166444	9.78478	6.44204	0.0449999
C3orf18	-0.00474083	9.60208	0.0816515	0.928818
HMGB1P5	0.123327	9.61871	12.8647	0.100837
RBMX	-0.085525	9.97355	2.56432	0.211274
INPP5J	0.0215329	9.59561	15.1314	0.454699
UFD1	-0.00762145	9.64633	0.0220469	0.931571
SH3BGR	0.121594	9.65905	4.61408	0.181971
CSE1L	0.145773	9.7123	4.97789	0.111193
YWHAB	-0.0975778	9.73351	2.23625	0.268298
COMMD7	-0.00671408	9.62775	0.0262631	0.935023
ABHD12	-0.157779	9.79199	5.98112	0.0556242
PAK5	-0.348376	9.79307	28.7147	1.64244e-05
ILKAP	0.0523553	9.76443	0.634184	0.545836
C2orf80	-0.0718822	9.69051	1.29869	0.429623
FAM171B	-0.0945339	9.97929	3.04502	0.164228
DHFR2	0.0282233	9.60667	1.56685	0.646558
HSP90AA2P	0.0230057	9.59852	4.37392	0.582228
PPP2R5E	0.0532625	9.93503	0.798976	0.46083
CCM2	-0.0116214	9.7168	0.0312386	0.897328
RAB27B	-0.0695156	9.76903	0.946951	0.414855
TRAPPC6B	0.137979	9.70704	4.78323	0.132612
ERH	0.00282222	9.67253	0.00232679	0.975395
AC016739.1	-0.0302608	9.59845	6.86455	0.487721
RSRC2	0.286036	9.7686	18.9285	0.00119935
ST6GALNAC5	-0.0608948	9.60867	5.5983	0.356542
UNC80	0.0526408	10.0667	1.02735	0.408558
KCNG1	0.0200902	9.59396	89.6795	0.160583
KCTD10	-0.00298211	9.62112	0.00669577	0.969594
COX6B1	0.188249	9.6846	9.05475	0.0422887
STMN3	0.0214528	9.65023	0.163261	0.810686
DAAM1	-0.0899841	9.80894	1.83569	0.269199
LINC01821	0.00933345	9.59344	71.0158	0.339817
TUBA1A	-0.350378	9.79349	29.0822	1.44961e-05
RPL13AP20	0.00933341	9.59344	77.1273	0.339812
ZFYVE21	-0.105578	9.64821	4.25752	0.234746
CPNE9	-0.0434237	9.59702	24.4225	0.262937
MFSD6	-0.126703	9.7739	3.75446	0.133059
PRKCA	0.0473318	10.6008	4.36958	0.272752
CCNQ	0.0434962	9.61733	1.67616	0.560749
SMAP1	-0.0743484	9.93058	1.69728	0.298612
GABARAPL1	0.0241758	9.64631	0.222197	0.78543
SPRYD7	0.225796	9.65063	18.235	0.0120463
CIR1	0.10619	9.76889	2.61061	0.220816
PGM2L1	-0.114037	9.64321	4.97135	0.194184
MRPS21	0.0626231	9.65828	1.28767	0.490495
CPNE4	0.162017	9.64159	10.3117	0.0644564
PRR13	-0.00181505	9.60689	0.00636123	0.976827
OXCT1	-0.173839	9.78	6.97161	0.0371481
CHP1	0.0213794	9.65637	0.148471	0.813161
NAP1L1	0.018065	9.9369	0.101078	0.801342
FKBP2	-0.149428	9.6768	6.29682	0.0996094
CDC123	0.0583048	9.68197	0.906766	0.526058
SELENOH	0.0743344	9.61122	7.40345	0.271216
TMCO1	-0.031945	9.74122	0.243113	0.716663
TMED2	0.17611	9.65638	10.4647	0.0526703
PAK1	-0.300343	9.71592	21.5308	0.00064347
SLC7A10	-0.0175735	9.60647	0.614026	0.777041
WAC-AS1	-0.131855	9.63739	7.7635	0.126447
MRPS36	0.0991355	9.6448	3.78217	0.262835
SLC1A2	-0.00754812	10.4023	0.0560415	0.876934
POGZ	0.110305	10.0167	4.65938	0.100372
RPL15	-0.0316561	9.7958	0.234065	0.703331
CAPN1	-0.0765276	9.63115	3.06079	0.362682
RGS4	-0.0148827	9.59537	7.18105	0.618731
NUDCD3	0.00473785	9.84087	0.00566487	0.952402
JAZF1	-0.3338	10.0923	46.5889	2.15169e-08
PHPT1	0.0211088	9.64132	0.185129	0.809539
THAP6	0.118157	9.69134	3.56038	0.20005
LAMTOR5	0.123652	9.64283	6.27569	0.160065
CNPY3	0.00843844	9.62075	0.0533028	0.913731
PVALB	-0.00636545	9.59579	1.00517	0.841006
FAS	0.0200915	9.6087	0.643785	0.757061
INPPL1	0.0164412	9.63312	0.137708	0.846274
AK5	-0.286243	9.77699	17.6642	0.000546778
CCND2	-0.064217	9.71908	0.992525	0.473136
ATP1A1	-0.0535412	9.82552	0.691159	0.504659
HAX1	0.012837	9.63224	0.0862459	0.879164
CAMSAP2	0.0503221	10.2078	1.65932	0.37375
DNAJC5	-0.127818	9.68785	4.31889	0.15888
PTGES2	0.0455362	9.62073	1.55722	0.557449
NDUFAF5	0.0213307	9.68143	0.123581	0.816144
NAXE	-0.0350124	9.63426	0.599229	0.681432
SNRPD1	0.0449576	9.64993	0.748055	0.615664
SH3D19	-0.0574512	10.2814	2.51603	0.276436
KDM1A	0.265409	9.6478	26.8338	0.00294411
MED9	-0.0799981	9.62641	3.91733	0.328202
BAP1	0.0281885	9.63284	0.397553	0.739185
KIF5B	0.196965	9.81801	8.99681	0.0177522
CAMTA1	-0.0413875	10.3494	1.62399	0.411014
FBXO33	-0.0842859	9.68037	1.90231	0.35498
ARHGEF2	0.0374312	9.69064	0.36866	0.683183
SERBP1	-0.114652	9.73225	3.22337	0.193219
LAPTM4A	-0.11128	9.66681	3.87409	0.220001
B4GAT1	-0.0287966	9.64215	0.334601	0.74277
PREX1	-0.0829707	9.90671	1.89774	0.257399
MBOAT2	0.249885	9.98594	18.5163	0.000377975
EIF2B3	-0.102835	9.74208	2.43398	0.239292
MARK1	0.133337	10.0349	6.72605	0.0439767
TMEM242	0.0930341	9.63944	3.75989	0.285003
GDF10	-0.110552	9.60034	58.1048	0.029813
GRIN2B	-0.461895	9.89911	56.196	7.90582e-11
MAPK1	-0.019502	9.945	0.118946	0.783335
SRCIN1	-0.121145	9.63102	7.36011	0.149387
CUEDC2	0.119036	9.65079	4.94521	0.185251
CTSD	0.0324924	9.69321	0.265731	0.722828
MEAF6	0.00182395	9.68554	0.000894971	0.984109
CDC42BPA	0.167865	10.3635	30.8586	0.00103044
RPL13	-0.214383	9.99479	16.1651	0.00117502
UBE2D4	0.0155601	9.63409	0.118056	0.855074
EIF5A	0.0577877	9.66801	0.989625	0.528151
HNRNPU	0.353764	9.99027	42.4503	6.04259e-07
KLC1	-0.0487415	9.73435	0.577543	0.581623
PLIN3	0.023128	9.61453	0.554651	0.748806
COQ10B	0.0459488	9.6314	1.11156	0.584372
NUDT14	-0.00430965	9.59589	0.433022	0.893338
ST8SIA1	0.116878	10.0342	4.37533	0.0770534
COPS2	0.215497	9.74965	10.2773	0.0158514
RPL30	0.0755341	9.66057	1.79131	0.407084
TLK1	-0.115662	9.86824	3.39783	0.1284
GNA15	-0.0226329	9.59421	47.9622	0.318455
FIBP	0.00753327	9.64538	0.0225143	0.932215
RNASEH1	0.0304698	9.61354	1.04947	0.668068
NOP53	0.180217	9.6316	17.2505	0.0310289
B2M	0.265958	9.91103	16.7983	0.0004555
HERC1	-0.0276646	9.97643	0.25951	0.687017
MAP2	0.223387	10.5299	66.2677	1.28231e-06
DERL2	0.0556287	9.6572	1.03983	0.539532
KCTD13	0.0784322	9.62728	3.7782	0.337483
UBL7	0.105082	9.60976	16.9571	0.105164
IRF2BP1	-0.0583437	9.60876	5.26565	0.377692
C9orf16	0.0268353	9.62423	0.463798	0.737902
NARFL	0.051165	9.61872	2.1918	0.500452
KEAP1	0.101689	9.63191	5.42778	0.226438
MYL12B	-0.0515306	9.64517	1.03607	0.559993
UBALD1	0.113132	9.61726	11.5219	0.125857
TBRG1	0.177067	9.66679	9.50637	0.0543512
UQCRC2	0.0276077	9.79512	0.184236	0.74146
PHKB	-0.174232	9.92981	9.12868	0.0138757
SPIRE2	-0.0638092	9.64906	1.47013	0.474029
C17orf100	-0.0398126	9.59872	11.4224	0.374081
HLF	-0.0822217	9.67944	1.8297	0.366967
TEX2	-0.266398	9.7246	17.3149	0.00235484
SCRG1	0.0510281	9.93602	0.736697	0.479328
NRBP1	0.0257121	9.66351	0.202349	0.777924
OAZ2	-0.0644764	9.67375	1.21219	0.47955
SNAI2	0.0762166	9.60002	36.7704	0.0841567
CYCS	-0.0307606	9.63703	0.429892	0.721397
TNRC6C	0.0906719	10.1689	4.72618	0.122107
RPL6P27	-0.011823	9.6003	0.671409	0.808092
PCYT2	-0.0409942	9.60595	3.47563	0.505422
TFG	0.0506524	9.74725	0.600418	0.565656
ZNF446	-0.0141209	9.60358	0.5722	0.803018
STX1B	0.10335	9.63524	5.07844	0.226741
RPS15	0.139937	9.79536	4.22874	0.0982057
NDUFA3	0.148419	9.67076	6.34797	0.107308
ELP6	0.0804527	9.63583	3.04536	0.348233
GRHPR	0.0821651	9.663	2.14252	0.36847
PHYHIP	-0.198104	9.62978	20.7123	0.0176362
DHPS	0.0611393	9.62679	2.25639	0.453581
MED29	-0.0391799	9.62819	0.878948	0.635522
RPS19	0.10379	9.84514	2.5142	0.193744
DBP	0.112865	9.60692	26.8593	0.0592482
RPS9	-0.0734059	9.76011	1.27211	0.393539
PIH1D1	0.039576	9.63161	0.82835	0.637989
TMEM18	-0.0408173	9.61075	2.18985	0.55177
AKAP12	-0.221141	9.8761	11.7971	0.00303272
SYNJ2BP	0.0296321	9.64257	0.356865	0.736092
CFDP1	-0.0449144	9.8219	0.461977	0.577589
LARP1	0.0727755	9.79552	1.23523	0.386445
PPP1R21	0.0036929	9.78351	0.00312459	0.965163
CFAP36	0.198963	9.70968	9.53532	0.0306551
CHCHD6	-0.235041	9.70468	13.4944	0.00843736
MRPL4	0.106215	9.609	18.6241	0.0951496
PDHA1	-0.0581358	9.65876	1.13041	0.520241
PRPF4	0.191714	9.62088	29.7196	0.0118931
TMEM246	-0.00329463	9.63539	0.00511913	0.969332
CBWD5	0.211205	9.93394	12.6644	0.00413076
TTC39B	-0.208579	9.73329	10.0265	0.0169034
TUBB4B	-0.179088	9.61505	31.7416	0.0156947
SMIM19	0.0095548	9.62851	0.0523517	0.908021
IGBP1	-0.127039	9.65305	5.5829	0.155813
FBXO25	0.0230242	9.698	0.134838	0.801051
ACHE	0.0254624	9.62679	0.38872	0.75539
COL26A1	-0.00173734	9.60857	0.0046128	0.978715
GTPBP10	0.0411836	9.70317	0.420399	0.651783
CROT	0.108672	9.6588	3.72127	0.232557
CACNA2D1	-0.186697	10.1594	18.2824	0.00110144
DNAJC30	-0.0264534	9.60445	1.79229	0.651672
HDDC2	0.0242861	9.68463	0.159788	0.791219
FUT9	-0.0807602	9.97962	1.89022	0.235263
COX7A2	0.0756198	9.69001	1.4884	0.410952
ENPP4	-0.0338169	9.65594	0.388995	0.707768
KLHDC3	0.123828	9.63426	7.3542	0.145364
OARD1	-0.0561017	9.63399	1.5575	0.510218
PHF20L1	0.144538	9.87117	5.35317	0.0639004
TTC1	0.245322	9.81949	13.4017	0.00325973
AC008608.2	-0.051861	9.59887	18.9559	0.255051
SKP1	0.141372	9.79591	4.76664	0.0946563
MCTP1	-0.190727	9.9375	9.88457	0.00653406
IFT22	-0.0232855	9.60386	1.49223	0.684802
NDUFA5	-0.182038	9.69842	8.75141	0.0429893
MSL3	0.228972	9.62069	42.4321	0.00241886
NDUFS6	0.0113345	9.66145	0.041152	0.90081
FRG1	0.0309907	9.68176	0.261431	0.735666
HSPA4L	1.2671	9.85696	268.37	8.8573e-45
SOBP	-0.144484	10.0106	7.28135	0.0275708
AC004057.1	-0.00127385	9.59526	0.0580678	0.964374
PPA2	0.0386891	10.079	0.643145	0.538499
PLPP6	0.0219904	9.60037	2.50508	0.645313
PPP3CA	-0.0430193	10.2105	1.11219	0.440946
TSC22D3	-0.041198	9.73171	0.38806	0.642413
UBE2K	-0.00486425	10.0244	0.00938875	0.941062
LDB2	-0.484829	9.72395	51.6396	1.77735e-08
AC093323.1	-0.135802	9.61	25.9259	0.0474133
VLDLR	-0.116801	9.61957	10.8099	0.13237
TAGLN3	-0.153802	9.67768	6.7123	0.0899926
CBWD3	0.177736	9.90802	8.78489	0.0182964
FAM107A	0.282404	9.67238	21.1111	0.00234375
CAMKV	-0.128275	9.61114	20.9027	0.0661948
INIP	-0.00477642	9.70918	0.0054351	0.957958
GPX1	0.0595424	9.62715	2.05452	0.466613
RUFY3	0.223605	10.0261	18.9053	0.000918523
FBXL2	-0.147699	9.73324	4.76574	0.0924631
USF3	0.116082	9.67325	3.74138	0.20763
RANBP1	0.106178	9.6298	6.34514	0.200892
SUMO3	-0.0151819	9.61197	0.276388	0.827768
C21orf33	0.0860823	9.63411	3.63651	0.311625
CHMP4B	-0.0620764	9.64816	1.46494	0.485364
CRNKL1	0.249864	9.64623	24.554	0.0049256
SNAP25	-0.114733	9.68212	3.56922	0.206995
MRPS26	0.0543529	9.64381	1.18463	0.538007
TRIP12	0.215776	10.0183	16.8651	0.00148148
RPL10P6	-0.0052294	9.59351	12.3664	0.719897
SRPK2	-0.00708972	10.0719	0.02129	0.910328
C4orf3	-0.0300874	9.63204	0.475624	0.721511
ACOT13	0.0500173	9.6307	1.33629	0.549961
EBPL	-0.175	9.64315	12.5118	0.0459048
APLP1	-0.0221989	9.67334	0.135833	0.808126
BRD3	0.0280574	9.63573	0.372544	0.743649
KATNAL1	-0.152888	9.69754	5.76202	0.0900399
RPS2P5	0.0251831	9.59817	6.01168	0.533377
CRYM	-0.208792	9.60354	117.324	0.000402541
AKT1S1	0.0797132	9.61361	7.21967	0.257995
ROGDI	0.0248867	9.6151	0.634932	0.732436
NAB2	0.0781578	9.60012	37.0766	0.078074
JPT1	-0.0500551	9.62835	1.41344	0.545308
SPRYD3	-0.025183	9.61716	0.564475	0.737685
OBSL1	0.105734	9.65439	3.84068	0.242324
PSMC4	0.0949361	9.62791	5.35931	0.247233
PTMS	0.235587	9.69819	13.1579	0.0111096
KCTD6	0.123145	9.66005	4.86346	0.177019
HPCAL4	-0.108614	9.60947	16.5953	0.108137
LONRF2	-0.0197628	9.73604	0.0924204	0.823374
PAK3	-0.0622076	9.86059	0.868696	0.419998
NTM	-0.0608004	10.6979	8.75016	0.130362
GGNBP2	0.084324	9.70284	1.7623	0.357144
ARRDC2	0.0864142	9.59974	54.0083	0.0418483
LPCAT4	0.0964135	9.61576	9.61475	0.184241
PAFAH1B2	0.0906002	9.69791	2.06443	0.323831
PEX11B	0.0102146	9.62426	0.0701299	0.898769
AAMDC	-0.0532076	9.63971	1.21357	0.541091
PARK7	0.129248	9.70458	4.07302	0.159183
IDH3B	0.0729927	9.61994	4.23638	0.3417
TMEM9	-0.016007	9.64189	0.107359	0.855165
PTPN11	0.0224608	9.74558	0.115149	0.798727
PTPN20	-0.274618	9.62109	53.7897	0.000500844
S100A13	0.0954119	9.62519	5.81181	0.235416
NAPRT	-0.0351729	9.59667	18.5176	0.342751
DICER1	0.23863	9.9361	16.9237	0.00120815
PCDH17	-0.0295467	9.98361	0.280375	0.664708
MAGI2-AS3	0.0064975	9.76572	0.010173	0.939908
DANCR	0.107658	9.68467	3.06676	0.24314
RPL26	-0.0781236	9.64713	2.14547	0.378662
RAB18	0.0339427	9.77232	0.274832	0.692445
RPS26	-0.153446	9.6895	6.04641	0.0900121
M6PR	0.012283	9.62586	0.0955031	0.879836
RAB3A	-0.0179364	9.60229	1.10113	0.739165
ODF2L	-0.269376	9.67474	21.1528	0.00276998
FNDC10	-0.0226328	9.59421	50.8398	0.318456
MALSU1	0.247123	9.6856	16.1056	0.00790021
RPL3P4	0.00683273	9.60348	0.127302	0.902744
TM7SF2	-0.245509	9.63251	31.0007	0.00366059
SH2D3C	0.0291247	9.59599	21.6783	0.336487
B3GNT4	0.00361781	9.59316	67.7695	0.552755
2022-03-02	-0.043222	9.61426	1.93131	0.551493
SLC22A17	0.00898468	9.93153	0.0233973	0.900852
FJX1	-0.0397363	9.60677	2.96947	0.527622
CCP110	0.175996	9.69086	7.72258	0.0572958
TMEM74B	-0.0452537	9.59845	15.7051	0.304123
CBWD1	0.0774515	9.79314	1.40881	0.358139
CADM3	-0.0800561	9.6616	2.01528	0.376722
TUBB	-0.223713	9.65196	17.9018	0.0119311
POLR2L	0.0439656	9.62879	1.06856	0.595164
NDUFB9	0.0307011	9.64003	0.402103	0.724814
TMEM258	-0.0846914	9.63974	3.14514	0.330464
OTUD6B-AS1	0.196901	9.66238	11.9073	0.031773
TMEM54	-0.0174046	9.61426	0.318184	0.809909
SPIN1	0.0113168	10.0141	0.0462908	0.864884
ANO6	-0.140803	9.94579	5.64859	0.0440131
LYRM1	-0.0367533	9.63203	0.691927	0.663274
SCCPDH	-0.0464901	9.69113	0.567796	0.61005
VPS35	-0.0560767	9.68839	0.840017	0.538517
TTC19	0.117934	9.8171	3.42442	0.152691
ECE1	0.0221219	9.63634	0.218093	0.797045
CCDC85B	-0.00833629	9.66033	0.0220035	0.926828
PDCD5	-0.0132581	9.66953	0.0524585	0.884591
C1QTNF4	-0.206142	9.61805	35.5894	0.00720524
SNCG	-0.0219974	9.59887	3.40287	0.622893
MAST3	-0.258586	9.61976	52.0081	0.000918125
MED4	-0.000735395	9.68878	0.000143592	0.993597
ACSL1	-0.0964315	9.6302	4.87467	0.249121
HIVEP1	-0.109654	9.78431	2.72563	0.189267
CEP170B	-0.0117187	9.60493	0.319504	0.843159
SUMO1	0.019088	9.68617	0.0957208	0.835083
SCN1B	0.0239404	9.60047	2.95955	0.617925
CCDC88B	0.059564	9.59834	36.5654	0.126711
ACTR6	0.196567	9.63746	18.065	0.0224442
LY6H	-0.328406	9.7065	26.5942	0.000205432
ATN1	0.170767	9.68609	7.53742	0.0651622
SLC6A17	0.00431599	9.59554	0.575658	0.884622
MALAT1	0.177489	11.2577	142.962	9.45787e-09
HP1BP3	0.256537	10.1402	30.529	2.8543e-05
B3GAT3	-0.094657	9.6593	2.95517	0.294599
COPE	0.0319586	9.64938	0.383678	0.72082
DAD1	-0.0509107	9.67152	0.753419	0.576747
EIF5	0.419054	9.75689	39.7132	3.61881e-06
NARS	0.0805387	9.68346	1.80229	0.381779
RPS28	0.204473	9.82248	9.25481	0.0134725
BABAM2	-0.107529	10.0588	4.42589	0.0877011
FEZ1	-0.0632112	9.75018	0.9366	0.467476
UBA52	-0.0907869	9.7004	2.00307	0.315657
GNAO1	-0.101786	9.90039	2.80848	0.166642
OSBPL8	0.0340699	9.91839	0.317101	0.642149
COPS3	0.0312187	9.64703	0.375319	0.725656
RPL23A	-0.0150727	9.65928	0.07157	0.867946
MAP2K6	-0.383054	9.70126	37.4269	1.47432e-05
KPTN	0.0370088	9.60828	2.30317	0.563106
SRM	0.120084	9.64772	5.2349	0.178397
DYNLL2	-0.0399624	9.63912	0.702119	0.64562
SV2B	-0.0130109	9.60319	0.51112	0.815496
CLASP1	0.10105	10.3393	10.2351	0.0501627
CAMK2A	-0.222921	9.62332	32.4383	0.00547644
MRPL13	-0.0852863	9.65141	2.5496	0.340268
ANKRD12	0.342591	9.83686	27.1524	3.45838e-05
MLLT1	0.0734952	9.65294	1.8704	0.414828
ARL8B	0.0401508	9.76609	0.38197	0.642238
MAGED4B	0.0164202	9.68931	0.0663552	0.85774
MAPRE3	-0.100598	9.64679	4.00976	0.256263
MAGED4	0.119054	9.81022	3.25803	0.151925
LINC00599	-0.317317	9.67681	28.5811	0.000405999
CBWD2	0.130036	9.81879	3.97597	0.114631
SBDS	0.0329062	9.64607	0.423598	0.710846
WBP4	0.191684	9.69677	9.13905	0.0383184
ILF3	0.0379922	9.7502	0.338179	0.665272
BABAM1	0.0760368	9.61613	5.57837	0.299324
AC021016.2	0.00763413	9.59414	7.82156	0.697142
PTCHD4	0.00708387	9.60005	0.265753	0.881148
JUND	0.0782536	9.70179	1.51005	0.392854
GCC2	0.189555	9.79968	8.20853	0.0251705
UQCRFS1	0.0713487	9.63742	2.33357	0.408697
FAM105A	-0.186627	9.6085	52.2713	0.0052576
PPP5C	0.0560523	9.68573	0.850339	0.541998
FGD4	-0.19249	9.71321	8.28387	0.0305203
ZNF76	-0.0919528	9.64851	3.14649	0.301235
FAM216A	0.0680608	9.66072	1.48002	0.455003
BCL11A	-0.156565	9.62449	14.8418	0.0529021
TEX261	-0.0876065	9.61641	7.00101	0.242324
NUAK1	0.0585265	9.62155	2.49414	0.453904
ANKRD39	0.0866696	9.61275	9.1047	0.211197
MRPS9	-0.0758035	9.73843	1.29439	0.38853
CCDC74A	-0.00628265	9.59502	1.75105	0.818262
RNF181	0.0969697	9.6101	14.0135	0.139078
CCDC74B	0.0144171	9.59369	92.481	0.235059
ZNF275	0.136531	9.6423	7.71463	0.120204
ENOX2	-0.320501	9.7068	23.2466	0.000292973
NKAP	0.315896	9.64751	37.6103	0.000392192
FRMPD4	-0.139815	9.63074	9.4389	0.0956595
NPDC1	0.18794	9.72098	8.30606	0.0395324
NCS1	0.0126647	9.64956	0.058317	0.887368
ST6GALNAC6	0.0785681	9.59852	64.3104	0.0395486
CDK9	0.170811	9.61786	26.8175	0.0204237
SH3GL2	0.030313	9.67613	0.232615	0.741123
ARFGEF1	0.108552	10.0238	4.43319	0.103533
UBE2V2	-0.107783	9.71497	2.83369	0.22837
STMN4	-0.393207	9.66305	51.2151	1.00965e-05
POLR2J3	-0.116677	9.78637	3.35001	0.161228
TMEM130	-0.290367	9.64988	31.1624	0.00102425
EIF4H	0.0184159	9.70298	0.0864945	0.839808
LINC00957	0.0218094	9.59642	9.50787	0.510291
EEPD1	0.065947	9.63021	2.21162	0.428986
TMEM106B	0.119222	9.83548	3.5023	0.140284
FSCN1	-0.157305	9.63513	11.4598	0.0658835
SH3BGRL2	-0.18481	9.69775	8.36423	0.0399442
AARS2	0.0383213	9.59964	9.34233	0.393323
MEA1	-0.029155	9.60214	2.90487	0.587828
DNPH1	-0.0667773	9.6153	4.38498	0.365429
GLO1	0.0557518	9.67223	0.880229	0.543589
HLA-A	0.272401	9.80655	15.8782	0.00131475
TIGD6	0.109048	9.60176	56.1613	0.0223692
ETF1	0.00518939	9.66629	0.008163	0.954646
TXNDC15	-0.0201799	9.68343	0.1111	0.825433
PAM	0.0289993	9.90127	0.201254	0.697439
CCNH	0.303116	9.70531	22.4645	0.00111374
SCOC	0.0536709	9.66715	0.867647	0.557674
SEC24D	-0.110663	9.68415	3.08844	0.22353
PCDH10	-0.08341	9.79063	1.64382	0.315873
GRINA	-0.109027	9.64588	4.65215	0.217514
FGF12	-0.131958	10.5667	18.1713	0.00221256
GRSF1	0.0379966	9.70191	0.370211	0.677275
SEC61A1	0.0116486	9.6761	0.037809	0.898866
MTRNR2L12	0.346866	9.63043	66.1853	2.03608e-05
PRPS1	0.000586855	9.62357	0.000224907	0.994141
RNF7	-0.0438909	9.66197	0.613506	0.628666
RHOA	0.017198	9.71323	0.0716418	0.84931
NDUFA6	0.0784685	9.63997	2.66703	0.368147
BPHL	-0.0386192	9.63532	0.714035	0.652169
NCAM2	0.0433054	10.7976	4.68358	0.26048
TPD52L2	-0.0254147	9.65834	0.219143	0.778864
PTPRT	-0.47794	10.1921	99.9547	8.6469e-19
HSPA5	-0.402638	9.75374	38.9411	1.67452e-06
MMP24OS	0.0464218	9.61685	2.00376	0.532093
PRNP	-0.0699522	9.78424	1.14929	0.404201
METTL5	0.100017	9.64898	3.69246	0.263639
VDAC3	-0.0740633	9.69403	1.40701	0.415063
CHAMP1	0.0453043	9.63991	0.872031	0.603302
RGCC	0.137018	9.86808	4.57308	0.0797547
MVK	0.00235143	9.6196	0.00433184	0.975653
CKAP4	-0.158151	9.62948	13.5592	0.0578201
NDUFA12	-0.0251406	9.686	0.167613	0.78333
CNTN5	-0.610972	9.8652	73.8438	4.39438e-17
KDM1B	0.055705	9.71098	0.719431	0.540145
KPNA4	-0.170484	9.73107	7.11234	0.052137
EIF2S1	-0.0457054	9.68169	0.561602	0.616831
CNTN1	0.0660469	10.587	6.66132	0.130076
PCF11	0.214644	9.80406	11.0031	0.0110746
METAP2	0.0132109	9.76397	0.0402979	0.878449
MCRIP1	0.110849	9.64875	4.564	0.215221
MLF2	0.193691	9.67318	10.6086	0.0362267
AP2B1	-0.0560492	9.87815	0.864434	0.459288
SPCS2	-0.0653778	9.79919	1.03579	0.428275
PAN2	0.112976	9.64331	5.24314	0.199983
STX5	-0.00628806	9.66459	0.0121328	0.944981
IMPDH2	-0.00472424	9.61488	0.0219846	0.948308
PARL	-0.041398	9.60744	3.00714	0.517627
UBA1	0.117574	9.80928	3.31944	0.157446
MTCO1P12	0.0303334	9.60364	2.68825	0.585701
NECAB1	0.16271	9.68046	6.68901	0.0786832
SCG2	-0.0664483	9.71942	1.04448	0.457695
TMEM59	-0.0304417	9.78454	0.218343	0.71758
ATP6V1E1	0.0695216	9.66633	1.45741	0.44767
PSPC1	-0.106377	9.98242	3.9157	0.115926
GNRHR2	0.0582307	9.59667	71.2638	0.0596167
TM9SF2	-0.0628392	9.76296	0.937255	0.464245
CETN2	-0.00433296	9.60611	0.0385517	0.94356
RNF187	-0.147519	9.6428	8.96907	0.0924032
LYST	0.102168	9.89519	2.56728	0.177043
ARPC3	0.0866536	9.65333	2.63489	0.336838
TMBIM6	-0.0190143	9.87097	0.0962981	0.804042
GANAB	-0.112462	9.66991	3.81288	0.215701
ENC1	-0.133908	9.61615	16.493	0.073923
GRAMD1B	-0.284853	9.88643	21.2437	0.000101588
TTC9B	0.182974	9.65528	11.2863	0.0437465
CASC4	0.03153	9.94558	0.309087	0.65825
LRRC8B	-0.0440856	9.7061	0.4668	0.626165
PRPF19	0.0234118	9.63463	0.267159	0.783959
MAPT	0.456999	10.1034	80.2824	1.86753e-12
LMO7	-0.265828	9.62998	38.2106	0.0014504
RRP15	-0.0614119	9.67414	1.07386	0.500794
CDK5	0.000953991	9.60284	0.00286113	0.986082
NTPCR	0.109715	9.65802	3.91368	0.227647
ADAR	0.107791	9.76416	2.75958	0.216234
UNC119B	-0.0570819	9.61451	3.38649	0.433862
CDK14	0.0417479	10.2806	1.3747	0.434801
GABRD	-0.0645227	9.59596	86.2797	0.0634871
ARHGDIG	-0.00326561	9.60371	0.0291939	0.954025
LRP8	-0.170727	9.63977	12.5299	0.0493763
CBX7	-0.111455	9.64765	4.79689	0.209113
BTBD2	0.0266591	9.66335	0.21746	0.769962
RABIF	-0.0216271	9.60854	0.734511	0.740724
CTNNB1	-0.0512717	9.81686	0.638513	0.526969
WAC	0.0663839	10.0982	2.14817	0.284707
DSTN	-0.163667	9.74189	6.53258	0.059733
MIEN1	0.123241	9.61658	14.5305	0.0917623
TMEM132A	0.0238274	9.63665	0.261554	0.782051
CHI3L1	0.241691	9.62028	44.5105	0.0012458
MAP2K4	0.315424	9.97167	29.0155	1.12894e-05
FKBP8	0.178585	9.662	9.89322	0.0512293
RFPL1S	0.0128319	9.60458	0.421108	0.825025
NOLC1	-0.0290995	9.62416	0.571985	0.717377
PIK3R3	0.00892032	9.60281	0.264033	0.869738
MRPL16	-0.00826579	9.62429	0.0446242	0.918107
PTOV1	0.324764	9.64408	42.3223	0.000225387
RAP1GAP2	-0.233042	9.63926	22.2855	0.00710983
RPL21P28	0.0200902	9.59396	90.6296	0.160583
HNRNPA1	0.188482	9.72315	8.20757	0.0386628
AMPH	-0.312271	9.83546	24.063	5.38216e-05
TNIP1	-0.0335126	9.63711	0.503807	0.69772
MXI1	0.254352	10.1043	25.8084	5.66496e-05
MTND2P28	0.0651531	9.61068	5.70908	0.33083
KCTD21	0.0173551	9.60483	0.73599	0.766405
WASHC2A	0.205538	9.70245	10.4044	0.0261651
REPS2	-0.31495	9.92239	28.3172	7.4987e-06
FBXO34	0.010629	9.70219	0.0264219	0.907109
GSTO1	0.0424614	9.65965	0.585709	0.640401
CBX6	-0.244322	9.69166	15.6378	0.00653409
DNAJC6	0.0155025	9.98104	0.0715048	0.821434
EIF4G2	0.136539	9.76413	4.30213	0.118293
TCAF1	-0.0818705	9.75253	1.55113	0.344686
ITPK1	-0.02631	9.7729	0.159681	0.757617
SLC35F1	-0.0753306	10.6646	9.21249	0.0656661
DDX24	0.0984484	9.76832	2.24044	0.256259
NAV3	-0.0434032	10.4871	2.23662	0.343686
WARS	-0.0910184	9.63593	3.81479	0.289139
EID1	-0.135347	9.75821	4.50668	0.114297
MYO5A	-0.0145101	10.3096	0.193436	0.78009
ALDOC	0.00847407	9.63194	0.037013	0.919947
KCNMA1	-0.0272831	10.4481	0.911503	0.562723
NDUFAB1	-0.0694683	9.67034	1.41499	0.445638
RPS27AP16	0.042428	9.59667	33.2274	0.194395
FAM96B	0.128305	9.6493	6.04072	0.152043
PHLPP2	-0.228391	9.67957	14.682	0.0113892
KARS	0.11471	9.63343	6.48502	0.175678
CMC2	-0.242414	9.72495	14.3217	0.00572974
AC135782.1	-0.086214	9.59757	73.3077	0.0398835
RPL23	0.0789116	9.70501	1.47625	0.388099
ELP5	0.0894994	9.60724	16.0445	0.142916
ARHGAP27	-0.0424438	9.60239	5.96021	0.437241
RAD51C	0.0103815	9.69125	0.0275394	0.909687
ADAMTS10	-0.0246058	9.63585	0.276568	0.774448
ETS2	-0.128376	9.60571	33.8276	0.0392138
CYB561	-0.00213009	9.59911	0.0315339	0.962126
NFRKB	0.0189312	9.63419	0.173995	0.824219
EIF2AK2	0.308506	9.8233	22.2166	0.000224663
SRP68	0.0247558	9.66934	0.183016	0.786773
TCF4	0.0115889	10.5988	0.28006	0.787703
GPR150	0.021572	9.59404	94.6215	0.145858
FAM81A	-0.0765544	9.60297	17.192	0.175467
SYT4	-0.103669	9.60437	26.1061	0.0820918
DOK6	-0.404862	9.80594	38.5465	3.25658e-07
SMU1	0.125396	9.75687	3.68572	0.153976
BSG	0.0700118	9.68966	1.23265	0.446383
PIK3CB	-0.0934761	9.85828	2.25861	0.225256
MAP2K2	0.000942347	9.68446	0.000239043	0.991787
STARD3NL	-0.0566151	9.68438	0.871141	0.534962
SLC2A3	0.277351	9.64254	27.7953	0.00156146
GTF2F1	-0.0689156	9.6227	3.34272	0.386696
CPLX1	-0.0724082	9.61583	4.92142	0.32992
ERC2	-0.301234	10.1626	37.9215	8.99314e-08
MRPS7	-0.0967536	9.62055	7.12125	0.216306
AC010615.2	0.0277206	9.6124	0.88032	0.691164
SRSF10	0.316044	9.80189	24.1581	0.000222512
ZNF540	0.164477	9.65768	8.88928	0.0708409
SIRT2	-0.117538	9.82113	3.31455	0.142347
RPS16	0.15652	9.75452	5.31544	0.0767088
PRPF31	-0.00693805	9.62818	0.0275418	0.933046
EPHB6	-0.160368	9.60847	39.9098	0.0161528
ADD3	0.00588909	10.1282	0.0172419	0.921926
GLT1D1	-0.00696442	9.74017	0.0103044	0.937154
EPN1	0.158832	9.63075	13.8314	0.0563848
YWHAQ	-0.0440002	9.78967	0.457665	0.598567
DYRK4	-0.00931799	9.60955	0.125366	0.888763
ATRAID	0.0259991	9.62198	0.491001	0.741071
TOMM7	-0.0939234	9.70453	2.18351	0.297939
ACTR1B	-0.18948	9.63573	17.0342	0.0269844
CXorf40B	0.05035	9.60187	10.1899	0.321798
BEX5	-0.127052	9.61422	16.3079	0.082232
SYP	0.123242	9.66073	4.73595	0.177026
PORCN	0.0371112	9.61537	1.35586	0.610902
UXT	0.122226	9.62581	9.39023	0.129525
NDUFB11	0.233811	9.65027	19.5404	0.00926593
RGN	-0.259326	9.70751	17.4825	0.00352765
CXorf40A	0.104875	9.60647	23.6129	0.0765988
SET	0.0109741	9.70678	0.0291908	0.903843
DNM1	-0.264431	9.78269	16.7806	0.00134074
STXBP1	0.0112361	9.78212	0.0296064	0.894503
GNAQ	-0.0425653	10.2434	1.38154	0.434073
ELAVL2	0.0303484	9.60015	4.97081	0.516836
RAD21	0.327954	9.78218	23.7956	0.000177574
ZNF706	0.0722125	9.7971	1.17705	0.389308
PEX2	0.0849069	9.73206	1.7129	0.343808
ASPH	0.0367883	10.063	0.532749	0.564113
XIAP	-0.0635709	9.75284	0.959122	0.463749
BAG4	0.0294202	9.66496	0.265935	0.747244
TRIM35	-0.101829	9.62121	7.46302	0.195888
TUSC3	-0.28814	9.75834	18.7503	0.000650456
AP1S1	-0.148747	9.6225	15.346	0.0619609
PEG10	-0.291942	9.64692	33.4706	0.000904643
HSPB1	1.08642	9.78934	196.826	5.6522e-31
MLXIPL	0.109481	9.60344	39.899	0.0365583
TSPAN13	0.0283957	9.64402	0.320422	0.747722
SRSF3	-0.0273549	9.75079	0.176683	0.753864
GNL1	0.069261	9.62303	3.34242	0.381475
ATXN1	-0.0356513	10.2703	0.85744	0.504081
RPL15P3	0.0507803	9.59789	27.3808	0.178684
SPOCK1	0.141187	10.2817	10.1989	0.00901514
PLK2	-0.283665	9.60187	291.004	3.54325e-07
ARHGAP10	-0.20382	10.0333	15.4944	0.00139194
CCDC126	0.0418253	9.68335	0.449305	0.648869
LIMCH1	-0.0811289	9.76643	1.2801	0.342091
RGS12	-0.0968413	9.81687	2.2721	0.229945
RNF168	-0.0474692	9.69176	0.578118	0.602446
GYG1	-0.00187806	9.63017	0.00188172	0.982072
NEK11	0.129314	9.72134	3.55299	0.154501
TUSC2	-0.0280178	9.61319	0.88394	0.694405
UQCRC1	-0.0821837	9.64276	2.73268	0.349265
SELENOM	-0.0808954	9.66836	1.95248	0.373761
PES1	0.0436364	9.61655	1.83428	0.555597
MAPK8IP2	0.0176007	9.62145	0.222539	0.822265
HSPA13	0.00205706	9.68077	0.00116807	0.982087
NBDY	0.248967	9.89856	15.2989	0.00117012
ZNF449	0.145411	9.62376	14.6488	0.0658359
RPL24P8	0.00388605	9.59474	0.927026	0.875282
SLC12A5	0.0283463	9.60195	2.97756	0.584212
SLC23A2	0.0172502	9.86878	0.0778658	0.822999
CHPF	-0.0641492	9.61589	3.84952	0.388036
PNKD	0.0553118	9.67435	0.872034	0.54704
SLC39A10	-0.0582268	9.77128	0.769397	0.494054
HCG18	-0.114822	9.67442	3.86263	0.206639
DBI	-0.159811	9.80709	6.13882	0.0486194
EIF5B	0.23283	9.76476	12.0066	0.00828313
DCTN1	0.0676814	9.62815	2.68416	0.410911
RPH3A	-0.260036	9.63077	32.9007	0.00191535
TTTY15	-1.06659	9.62128	1292.81	7.33757e-47
HECTD4	0.203337	9.9831	13.6315	0.0037175
THAP2	0.230239	9.65439	17.8859	0.0110988
HSF1	0.00476407	9.63271	0.0113432	0.955114
DZIP1	-0.0107448	9.96944	0.0399782	0.876754
VMO1	-0.0068063	9.59421	4.83334	0.753707
USP5	0.107108	9.62663	7.07187	0.187343
JTB	0.00688543	9.66114	0.015063	0.939618
TM9SF3	-0.0681277	9.82358	1.19358	0.396233
PDCD5P1	0	9.59298	0	1
B3GAT1	0.0668182	9.78483	1.0295	0.431558
PSMB1	0.0989205	9.70245	2.47102	0.280681
PTGES3	0.882412	9.95494	176.016	2.30514e-29
SCAF11	0.191382	9.92035	10.6319	0.0101969
SF3B5	0.0053376	9.62638	0.0172654	0.947828
MRPL51	0.0107397	9.6365	0.0526073	0.900705
EXOC1	0.0704981	9.80252	1.21447	0.397786
WASF3	0.125696	9.79783	3.62422	0.135836
GLUL	0.0441483	9.74401	0.421534	0.617471
ALDH9A1	0.0304891	9.66317	0.284973	0.738052
B3GALNT1	0.0808319	9.65346	2.24161	0.370338
TGOLN2	0.130052	9.69022	4.49183	0.158861
PUS3	0.199773	9.6159	42.3634	0.00489402
BANF1	0.210299	9.64862	16.3731	0.0187663
CROCCP2	-0.265894	9.69165	19.1203	0.00303122
RAE1	0.0503419	9.62922	1.43799	0.543859
RPL27A	-0.0667304	9.73359	1.06603	0.450214
ABCB8	0.13478	9.62142	14.0384	0.0814902
PLPP3	-0.154003	9.93968	7.02922	0.0283688
FABP3	0.0525406	9.60438	7.38334	0.353327
MARCKSL1	-0.0834481	9.89942	1.74203	0.258292
NAA60	-0.0414284	9.61455	1.77262	0.569604
FBXW7	-0.282434	9.85904	18.1965	0.000184791
ACTR8	0.107593	9.64603	4.46678	0.225861
WRAP73	0.13713	9.62006	15.3226	0.0719279
CMPK1	-0.0180343	9.69053	0.0849121	0.843529
CCNL2	-0.0186828	9.74245	0.0840779	0.831925
IDI1	-0.0288394	9.67198	0.239557	0.752222
RITA1	-0.0205825	9.59894	2.93202	0.646811
FBXL15	-0.0802532	9.61124	8.12974	0.2487
C9orf116	-0.0198353	9.59667	6.14236	0.58683
PRDX3	0.0686175	9.64507	1.8658	0.438549
MKL2	-0.0961835	9.84581	2.17153	0.218255
SSRP1	-0.00513573	9.62188	0.0191574	0.948029
HES4	-0.141335	9.60712	35.4033	0.0286781
MAPK3	0.00593297	9.62168	0.02548	0.939822
NECTIN2	-0.0776174	9.62436	3.88265	0.335941
KSR2	-0.388731	9.88495	39.3409	8.75295e-08
ANAPC5	-0.12478	9.77282	3.7923	0.139579
GREM1	0.0304525	9.60285	3.03253	0.572064
FAT3	-0.235653	9.78363	11.4136	0.0043258
POMGNT2	-0.0252503	9.63749	0.286962	0.770124
S100A1	-0.148941	9.61569	20.0379	0.0458306
PLPPR4	0.0671009	9.77846	0.994548	0.432766
PTP4A2	0.174217	9.71772	6.99444	0.05664
ANAPC10	0.0723322	9.82997	1.18921	0.371416
NR1H2	-0.0170332	9.62462	0.184099	0.832678
TMEM121	-0.245798	9.62763	35.0639	0.00288326
AC008026.1	0.0162356	9.59456	22.3542	0.462966
PSMC3	0.0588131	9.62914	1.91716	0.477853
GSK3B	-0.00222714	10.1609	0.0027929	0.969571
TTLL7	-0.00445176	9.97344	0.00560075	0.948551
PEMT	-0.106253	9.63476	5.36639	0.213744
PLCB1	0.0286417	10.4296	0.841762	0.551011
C1orf174	-0.0190374	9.60945	0.526615	0.77504
SIK2	0.0604397	9.8858	0.902775	0.426983
FAUP1	-0.0298235	9.59386	153.242	0.133424
TMEM126B	0.137394	9.65453	6.63334	0.129087
NASP	0.0485784	9.88472	0.664426	0.523064
GPBP1L1	0.0298188	9.7944	0.208069	0.72186
ARL5B	0.165631	9.66315	8.5431	0.0708126
RASGEF1A	-0.00999835	9.60843	0.158334	0.877793
NSMCE4A	-0.0404415	9.65016	0.604479	0.65092
YWHAE	-0.135001	9.88481	5.1106	0.0702243
NCOR1	0.0991078	10.0725	4.39899	0.11984
TSEN15	0.00358399	9.74732	0.00297681	0.967441
CHID1	-0.0952779	9.64001	3.88662	0.273911
SLC25A3	-0.126328	9.68896	4.34519	0.163699
MT1E	0.0998916	9.74818	2.17273	0.25898
LAMTOR1	0.0557197	9.63631	1.44336	0.516963
NRAS	0.0527867	9.61849	2.35068	0.485753
MLST8	0.0216491	9.60271	1.57402	0.687485
PSME2	0.00812919	9.61996	0.051432	0.916232
PALM	-0.0998057	9.6642	3.05232	0.270885
COX8A	0.045776	9.64621	0.796978	0.606263
SUCLA2	0.0153889	9.75753	0.0538026	0.859568
FAM192A	-0.121063	9.68969	4.06833	0.182028
RNF41	0.0463965	9.63345	1.06633	0.584681
PEG3	-0.0376963	9.70428	0.33878	0.677507
DNAJC3	-0.257661	9.80782	16.0412	0.00131558
RING1	0.106743	9.65348	3.81934	0.237142
KPNA2	0.0407377	9.61067	2.29286	0.545496
AHSA1	0.669111	9.72499	94.2113	1.55838e-12
PSME2P2	0.0179991	9.59386	84.4264	0.184313
BBS2	-0.0499526	9.90712	0.753468	0.496673
TMEM50A	-0.064034	9.66656	1.23158	0.481413
ETFA	-0.0868426	9.67851	2.10582	0.34052
EMC10	0.0430719	9.76689	0.417478	0.61804
FAM173A	0.117066	9.65144	4.95434	0.193201
FLYWCH1	-0.307537	9.65996	32.6834	0.000577273
MBIP	0.120006	9.7081	3.43057	0.189988
HIRIP3	0.0225568	9.6004	2.56556	0.637276
ATG16L2	-0.0327493	9.65671	0.354449	0.716857
NDRG4	-0.0313852	9.65461	0.337519	0.727457
SGTA	-0.140618	9.65979	6.34171	0.118796
LAMTOR4	0.0218293	9.64785	0.177788	0.806496
PELI3	-0.102777	9.60245	33.6121	0.0653798
BAD	0.115123	9.61492	13.8608	0.107016
ZFP90	0.074324	9.73662	1.27029	0.404955
BLOC1S1	0.00365569	9.62595	0.00803348	0.964143
CDK5R1	-0.0119863	9.61827	0.12037	0.874774
SAT2	0.104392	9.65995	3.55437	0.252076
SLC1A4	-0.155699	9.64564	9.5004	0.0776125
GPALPP1	0.186225	9.67674	9.68074	0.044267
TVP23C	-0.0745162	9.62309	3.78536	0.350886
NFIB	0.124536	10.422	17.961	0.010817
ODC1	-0.120402	9.61605	13.2075	0.107384
TVP23B	-0.0026406	9.66656	0.00210945	0.976923
EPN2	-0.200701	10.5352	49.8552	4.2321e-06
XPC	0.0465475	9.6302	1.19757	0.576932
PTGES3L	-0.013392	9.59466	10.7035	0.599546
MED1	0.00348622	9.65949	0.00396323	0.969345
RPS13P2	0.00722659	9.59333	76.1019	0.401135
ID2	0.208571	9.64842	15.1405	0.0196986
DUSP1	0.327621	9.64287	41.8332	0.000184662
PIAS4	0.130442	9.65135	6.08716	0.147137
ZNF426	-0.0259809	9.63588	0.313345	0.762249
PRDX2	0.0754736	9.63501	2.76117	0.37718
PRKACA	0.0246118	9.6582	0.197582	0.786079
2022-03-06	0.0573481	10.0387	1.3793	0.380283
SMDT1	-0.0207426	9.65292	0.150997	0.817445
RAB11FIP5	0.0107875	9.60928	0.17424	0.870046
FBXO27	-0.114184	9.6567	4.29087	0.204457
SLITRK4	0.177306	9.67552	8.56447	0.0552528
MAGEE2	-0.0134152	9.59544	5.42139	0.657249
USP11	0.130059	9.75797	3.88802	0.138982
CLCN4	-0.124762	9.67731	4.36722	0.169834
SLC27A4	-0.0479544	9.62091	1.68214	0.540298
RAD23B	0.0327659	9.81894	0.258916	0.687908
SHC3	-0.0893974	10.1225	3.8222	0.134089
VCP	0.0894095	9.68879	2.108	0.331548
CHMP5	0.0129287	9.65529	0.0575197	0.88614
RRAGA	0.0829387	9.63699	3.12406	0.335935
FDFT1	-0.0758252	9.6899	1.45707	0.404719
LUC7L2	-0.0803078	9.65699	2.20111	0.373033
EXOC4	-0.1305	10.2684	13.339	0.0135277
CBLL1	0.0875597	9.63753	3.45587	0.310741
CHN2	-0.0538114	9.59467	158.767	0.0469492
ARL4A	0.208645	9.71625	9.96965	0.0229611
ADAP1	0.0399433	9.60131	7.12011	0.421982
HCG11	0.0315347	9.60179	3.91174	0.538723
CAP2	0.47211	9.72564	43.3747	4.03822e-07
GMDS	-0.275996	9.77095	15.4122	0.000941261
GABRG2	-0.0635224	9.61171	4.87023	0.36396
TMEM161B	0.125829	9.78432	3.72916	0.141129
TRIM23	0.042811	9.73437	0.445103	0.631175
RPL26P19	0.0654704	9.63569	1.94491	0.445113
RPS27AP11	0.0108263	9.59351	87.7117	0.303796
NCBP2	0.0556899	9.62532	2.0256	0.490282
PSMD2	0.0581648	9.6463	1.29808	0.512703
TMSB4XP4	0.0352261	9.59789	13.7392	0.36388
MCCC1	0.216888	9.77499	10.5728	0.0128097
TBL1XR1	-0.00326506	10.2339	0.0069873	0.952709
TAF9	-0.0602895	9.60834	5.83997	0.357816
COPG1	-0.134946	9.63005	10.0127	0.106555
C3orf14	0.0191719	9.61767	0.318632	0.799036
MAP4	-0.00834742	9.88948	0.0187785	0.911664
EMC3	-0.110473	9.69911	3.08698	0.221716
POLR3H	-0.0203651	9.62925	0.233864	0.806502
TXN2	0.0047716	9.65134	0.00804586	0.957575
CLEC2L	-0.0134155	9.59544	5.49721	0.657251
CDS1	0.0276036	9.60303	2.40541	0.611718
DGCR2	-0.2159	9.84426	12.271	0.00522452
PRMT2	0.19934	9.86194	10.4261	0.0119086
INTS1	0.135564	9.6372	8.43158	0.115708
DPM1	0.0607975	9.67166	1.07737	0.507753
FITM2	-0.010359	9.60949	0.158087	0.876309
SLC24A2	0.135203	10.129	4.85668	0.0276185
PKIG	-0.0650443	9.68152	1.13299	0.475868
EDEM2	0.0190134	9.62927	0.197732	0.818931
RIPPLY2	0.126385	9.61396	18.1275	0.0714544
ZNF133	0.013426	9.69699	0.0454385	0.883152
SIRPA	0.00291891	9.70099	0.00211159	0.974452
PSMD1	-0.000492027	9.78293	5.77995e-05	0.995378
RETREG2	-0.0735004	9.65015	1.95945	0.410344
KCTD18	0.0525666	9.63153	1.43407	0.531654
UBE2G2	0.0515655	9.85313	0.697201	0.512466
PDE1A	-0.244959	9.63178	27.8312	0.00362805
NPC2	-0.0225821	9.61275	0.569513	0.749633
ZFAND2B	0.136055	9.61703	17.5711	0.0636503
ACTR10	0.0366236	9.64237	0.55321	0.67685
EFR3B	-0.110457	9.67735	3.29972	0.224665
OST4	0.0950073	9.62066	6.93119	0.218155
SNX17	0.0101199	9.61944	0.0825298	0.895252
CBLN2	0.0973249	9.6127	11.2318	0.158909
RAP2A	-0.0526739	9.74599	0.643597	0.546944
TXN	0.0998811	9.64725	3.73821	0.262334
PGRMC2	0.0844071	9.70198	1.72748	0.356893
BRI3BP	-0.195099	9.63752	17.0955	0.0236131
TYRO3	-0.035211	9.7549	0.285289	0.685012
EDF1	-0.069694	9.67786	1.35949	0.444805
ZNF865	0.0281515	9.61059	1.08852	0.676583
GFRA2	-0.0558508	9.59815	24.9043	0.197404
DNAJB9	-0.0808248	9.62648	3.93718	0.323461
NECTIN1	-0.270303	9.64521	28.7112	0.00206949
AURKAIP1	0.0790043	9.64145	2.65186	0.367311
TRIM8	0.0901224	9.66491	2.4703	0.324897
FH	0.0527521	9.62729	1.66595	0.519514
CTSF	0.143514	9.68428	5.43568	0.120577
ABHD13	0.331173	9.67726	29.791	0.00038352
LMO4	0.0791259	9.79014	1.44877	0.349495
SDF2	0.065418	9.63149	2.26154	0.436025
TRAPPC3	0.0454244	9.65318	0.706258	0.614132
FAM120B	0.14553	9.93283	6.32117	0.0466851
CHGB	-0.176758	9.61056	42.2031	0.0109065
CDS2	-0.0223643	9.81469	0.118395	0.78373
PTPN4	-0.103792	10.0839	4.64858	0.0919811
AP3S1	0.0378501	9.7704	0.320217	0.659932
SNX9	-0.063671	9.89086	1.10865	0.393701
UBE2J1	-0.123057	9.68263	4.19531	0.175645
MOAP1	0.0726203	9.61639	5.00438	0.323555
ALKBH5	0.0347178	9.66339	0.370912	0.703457
LINC01535	-0.142743	9.6933	5.36072	0.11451
DOHH	-0.00892739	9.60309	0.244595	0.872085
ZBTB8OS	0.146857	9.7312	4.91406	0.103683
SORT1	0.166285	9.95752	7.97658	0.0201164
ARV1	-0.1356	9.66312	5.77777	0.133654
SMUG1	-0.10461	9.60987	15.0686	0.124451
ZC4H2	-0.0129645	9.82395	0.0373392	0.872407
PNMA8B	-0.132691	9.605	39.5408	0.0298616
MTCO3P12	-0.0261659	9.59449	45.3187	0.294454
B9D1	-0.0632416	9.67243	1.14548	0.487903
RNF175	0.0138832	9.71348	0.0442292	0.87804
EVI5	-0.165526	9.93969	7.72833	0.0183147
TPP1	0.224788	9.64976	18.5905	0.0122517
ENSA	0.0539522	9.77212	0.657454	0.530438
STPG1	-0.0772784	9.62329	3.9786	0.334131
FBXO44	0.0747121	9.62657	3.34906	0.358581
SLC25A33	-0.121182	9.64528	5.81585	0.169747
TMCC1	-0.0522134	10.0587	1.11239	0.410006
PSMD13	0.111836	9.66815	3.69625	0.223413
GABRA1	-0.0637662	9.59795	35.293	0.136519
LUZP1	-0.267255	9.73091	16.674	0.00214542
MRPL21	-0.0890789	9.62771	4.64688	0.280274
KCTD2	-0.0189047	9.62739	0.207643	0.818114
ATP6V1B2	0.0302556	9.68866	0.244811	0.741484
CAMK1D	-0.345174	9.88278	28.5851	2.36128e-06
EPHA4	-0.0254071	9.61011	0.870887	0.706968
MED10	0.0850704	9.66727	2.22235	0.353491
TMEM177	-0.100751	9.61751	8.84335	0.184632
SRPRA	0.125752	9.6205	12.6232	0.101147
LUC7L3	0.440175	10.1814	116.993	4.12036e-13
AP4S1	-0.0248405	9.69748	0.155562	0.785027
TXNL1	-0.0473915	9.76505	0.524594	0.58071
UBE2T	0.0235833	9.59572	16.1145	0.419593
ARHGEF25	0.0166932	9.60009	1.47076	0.723391
PSMC2	0.0170103	9.64926	0.108385	0.84905
INA	0.0104604	9.60224	0.387244	0.843668
BMPER	-0.221344	9.85137	10.311	0.00388215
GLUD1	-0.100812	9.83737	2.5322	0.200881
CAMK2G	0.107288	9.74712	2.58982	0.226178
ATPAF2	0.0359359	9.63163	0.68136	0.669269
SNAPC3	0.0813509	9.7703	1.55952	0.34639
CCDC25	0.00707844	9.64199	0.0207306	0.935706
RAB39B	0.0410055	9.61888	1.38992	0.590308
MFAP1	-0.018474	9.64284	0.137179	0.8336
HAGHL	0.0528187	9.62119	2.08434	0.49786
WNT10B	-0.0119138	9.59474	7.80248	0.645607
HMOX2	-0.146493	9.62754	12.6008	0.0756746
GRIN2A	-0.0685985	9.61853	3.57441	0.370602
LCMT1	-0.0847613	9.7215	1.75345	0.341907
C1orf123	0.100496	9.63344	5.07847	0.235741
UBB	-0.0199467	9.60019	2.00849	0.681653
CMIP	-0.255746	9.87096	17.3405	0.00062332
CLTC	-0.0274243	9.80676	0.180862	0.738537
AC120114.2	-0.042038	9.60916	2.72057	0.527318
TMEM127	0.00461652	9.63079	0.0111961	0.956082
CDC37	0.00627544	9.65734	0.0131666	0.94473
DUSP14	-0.0284595	9.60524	1.79133	0.635827
H2AFY	-0.017509	9.69942	0.0799557	0.84748
NT5C3B	-0.0376022	9.62992	0.784502	0.652431
TACO1	0.0123946	9.60612	0.320184	0.838759
LSM5	0.104068	9.64038	4.67916	0.23326
AMZ2	0.163356	9.62876	15.5587	0.0467113
VGLL4	-0.228334	9.97686	17.8511	0.000671053
GMPR2	0.100743	9.61291	12.0238	0.145904
GPS1	-0.0788375	9.62868	3.4759	0.341976
RNMT	0.297482	9.76621	18.8437	0.000788189
TRAPPC4	0.0242669	9.62575	0.362195	0.764877
CYSTM1	0.106483	9.62774	6.74634	0.193485
USP1	0.0764883	9.63159	3.10832	0.362515
RPL10P16	0.0319637	9.60089	4.53891	0.51322
SAT1	-0.485394	9.92474	68.9297	1.94911e-12
NDUFB7	-0.0645895	9.65378	1.43848	0.472145
POLR2I	0.138704	9.61982	15.5607	0.0678846
ORAI2	0.0715182	9.62251	3.65159	0.363832
NEDD8	0.0446707	9.65677	0.674148	0.621915
FLOT2	0.0898315	9.6583	2.60528	0.323099
LINC00665	0.0438861	9.69139	0.500953	0.632359
ZNF428	0.130293	9.65537	5.71201	0.150575
EGR3	-0.0432327	9.59474	98.6628	0.113331
RUVBL2	0.00334891	9.62625	0.00692251	0.967227
MYADM	-0.0986551	9.62261	6.59466	0.215482
AAK1	-0.0150569	9.99101	0.0791987	0.824256
PRRG3	-0.113617	9.59914	78.1871	0.016991
HPRT1	0.443999	9.77894	39.7314	5.75201e-07
MAP7D2	-0.0372959	9.65456	0.451999	0.678688
TTF1	-0.00482618	9.64742	0.008651	0.956743
NTMT1	-0.013252	9.60086	0.79886	0.79199
FAM120A	0.0155622	9.84957	0.0614185	0.843304
OSTF1	-0.359962	9.66834	39.0861	5.68628e-05
DMAC1	-0.0415994	9.62891	0.98452	0.616312
POLR2K	0.150666	9.62126	17.5091	0.050579
DECR1	-0.0962996	9.84691	2.41908	0.217154
SDCBP	-0.0406543	9.70481	0.404073	0.653618
TNKS	0.075659	10.4215	8.29848	0.119392
MTERF1	0.151777	9.87442	4.90928	0.0510742
GNAI1	-0.0888667	9.87715	1.85085	0.239503
NEUROD6	0	9.59298	0	1
KDELR2	-0.00738915	9.64821	0.0203629	0.933924
CLVS2	0.178175	9.64455	11.6099	0.0440136
C6orf136	0.0563335	9.61858	2.6507	0.45717
AL136968.2	-0.00883834	9.59333	66.2481	0.478886
SMIM3	-0.135476	9.62925	9.79574	0.103728
SCAMP1	-0.00147964	9.83582	0.000549077	0.985213
PTK2B	-0.153122	9.62035	17.3883	0.0504576
HSPB3	0	9.59298	0	1
SMIM14	-0.161271	9.73318	6.27093	0.0658809
RSRC1	-0.110405	9.82158	2.72107	0.168282
MBNL1	0.156878	10.1511	11.3555	0.00893019
PXK	0.1187	9.90253	3.70816	0.114695
RPSA	0.0233392	9.75969	0.126076	0.788147
CBS	0.223087	9.65535	16.6073	0.0140307
FP236383.2	0.176714	10.6642	46.9436	2.88008e-05
ADRM1	0.119747	9.61143	19.7474	0.0737666
PSMA7	0.0049514	9.68944	0.00643377	0.956847
ACOT8	-0.0492736	9.62108	1.76807	0.529891
GAB1	0.101678	10.2506	6.63116	0.0648704
NNAT	-0.001643	9.61596	0.00249744	0.982258
FRG1BP	-0.322141	9.66273	31.4207	0.00031558
TMEM230	0.0925628	9.70238	2.0998	0.31254
SPCS3	-0.152747	9.76588	5.60343	0.0719109
PLEKHA3	0.170001	9.74826	6.50408	0.0563092
HIST1H4C	-0.193571	9.66748	11.2912	0.0321048
PAIP2B	0.0274755	9.63691	0.338046	0.749967
TCEA2	0.17592	9.63479	15.5232	0.0386755
MTIF3	-0.00957302	9.67732	0.0257836	0.916721
BNIP3	0.0773841	9.70278	1.37462	0.397875
UBE2QL1	0.0256114	9.63543	0.300241	0.765026
DDX50	0.0917735	9.73828	1.95781	0.303829
KCTD4	0.116988	9.63702	6.24147	0.174478
TCTN1	0.215772	9.64637	18.4913	0.0152529
STX1A	-0.0475465	9.59998	11.6055	0.329204
PSME1	0.0150682	9.61419	0.238047	0.834107
SEC16A	0.0458135	9.66018	0.687574	0.61451
CD63	-0.0116113	9.74896	0.0301635	0.894482
RALYL	0.165864	10.5519	14.4236	0.000239939
NR1D2	0.144788	9.77849	4.80797	0.0930128
PRPF38B	0.120019	9.68004	3.94888	0.193482
KCNMB4	0.117709	9.70159	2.87452	0.200069
SNUPN	-0.0280207	9.61515	0.766735	0.702457
TRIM69	0.394844	9.68876	37.5666	2.5792e-05
HNRNPA2B1	0.49718	10.1268	121.701	7.53724e-15
RALBP1	0.00328611	9.70103	0.00263505	0.971221
TESPA1	0.00361781	9.59316	67.3975	0.552755
NABP2	0.052853	9.61156	3.67043	0.43952
RPL14P1	0.051338	9.59712	38.7274	0.132925
RBM27	0.00967734	9.61064	0.130942	0.886522
CCDC124	0.186952	9.62361	24.0607	0.0172691
HADH	0.0944037	9.66332	2.70214	0.301856
MKRN1	-0.0940024	9.65857	2.91491	0.297609
SNX27	0.0924014	9.86386	2.15498	0.237169
NIM1K	-0.171418	9.77811	6.60642	0.0403276
HTRA1	-0.188981	10.2199	25.1944	0.000523487
PDZD11	0.0152469	9.6055	0.526879	0.798517
ABRAXAS2	0.160744	9.64329	10.5349	0.068167
LINC00507	0.00722659	9.59333	77.7933	0.401134
ARPC5	0.00734646	9.67497	0.0156042	0.936074
DTD1	0.0283935	9.63357	0.393833	0.738247
RPS8	-0.0272296	9.76533	0.163453	0.751364
RALGPS2	0.172281	9.97457	8.82626	0.01441
SLX1A	0.00933339	9.59344	78.6787	0.339812
KCNIP2	-0.116593	9.61253	15.8951	0.102027
PHYHIPL	0.242503	10.3553	44.1512	3.02261e-06
SLIT3	-0.00939987	9.60197	0.321742	0.859004
RWDD1	0.104842	9.67603	3.06615	0.255223
TRAPPC1	0.110348	9.60431	34.8024	0.0426985
ATAD3B	0.0846268	9.62068	5.5198	0.273342
NETO1	-0.157275	9.83202	5.70449	0.0460358
SSR4	0.128806	9.64187	6.79686	0.142088
TROVE2	0.0517571	9.78291	0.627703	0.542575
EPS15	0.25897	9.77988	14.3012	0.00293689
VPS29	0.142271	9.70105	5.07913	0.122224
CALR	-0.248692	9.64288	25.5773	0.00442498
FERMT2	0.0951016	9.82974	2.11068	0.241163
NFX1	0.0935079	9.74622	1.97714	0.291302
ROMO1	0.128608	9.61443	17.9518	0.0686675
RABGGTB	0.102926	9.62716	6.5137	0.207054
RPS7P1	-0.0052294	9.59351	12.4512	0.719897
SPOCK2	-0.107689	9.69673	2.99446	0.234253
RTCA	0.384834	9.70754	34.2399	3.81558e-05
KCNK1	-0.342955	9.67058	34.4956	0.000128493
HBS1L	0.300187	9.82814	20.3461	0.000303962
SHTN1	-0.12991	9.72395	3.65247	0.14284
PDCL3	0.0334435	9.60413	3.11856	0.554745
CNIH4	0.0315028	9.66161	0.31705	0.729318
FBXO28	0.0891506	9.73499	1.79245	0.319185
CDK2AP2	0.179343	9.63035	17.3165	0.0305371
RTN3	0.0523891	10.0531	1.14377	0.416486
MAP3K2	0.161358	9.86877	6.47994	0.0394632
COMMD8	0.0939263	9.61399	9.89195	0.18395
CACNG3	-0.0862155	9.60543	15.2005	0.159607
TIMM10	0.095826	9.61166	11.9095	0.15735
SLC25A27	0.00938916	9.9176	0.0270646	0.897867
ETNK1	0.147248	10.0404	8.78062	0.0256128
GABARAPL2	0.0294144	9.69285	0.225207	0.748108
IRF2BPL	0.133863	9.63722	7.87415	0.120392
AC091138.1	-0.0243283	9.63018	0.305635	0.771015
SLIRP	0.00769916	9.65144	0.0211177	0.931606
IFI27L2	0.160652	9.64349	10.5507	0.068499
MAP2K1	-0.21693	9.69586	11.6435	0.0157434
AL163051.2	0.0723723	9.60386	15.619	0.187004
CTNNBL1	0.0180573	9.74079	0.0733395	0.838245
CINP	0.0215108	9.63174	0.239058	0.79838
PRKAR1A	0.0989483	9.71509	2.34008	0.276901
RABL6	0.0614697	9.63998	1.64124	0.480854
ALDH2	0.228335	9.69766	12.8794	0.0138208
GRHL1	-0.0151955	9.60903	0.346933	0.817843
FAM57B	0.0252827	9.59659	11.4829	0.453583
FTH1P20	0	9.59298	0	1
GLG1	-0.00478249	9.98245	0.00800886	0.94429
CAMTA2	0.0639559	9.6219	2.96884	0.414416
NDEL1	-0.0177631	9.67056	0.0916481	0.845837
RPS19BP1	0.0776054	9.6426	2.43842	0.377605
MAPRE2	-0.00633213	9.91646	0.010816	0.930968
RPL41P2	-0.0113499	9.59554	3.72917	0.711481
U2AF2	0.119891	9.63851	6.42504	0.166602
CNDP1	0.153138	9.63193	11.2366	0.0678607
RABEPK	0.0713892	9.64509	2.03608	0.420312
MATK	-0.00701215	9.59964	0.282353	0.880487
SMIM7	-0.0173104	9.61979	0.240761	0.822841
YJEFN3	-0.0365551	9.61704	1.1675	0.626759
MRPL54	0.0295156	9.60799	1.49478	0.643077
UBAC2	-0.202451	9.83152	10.0531	0.00992541
RAB3C	-0.402231	9.78134	37.5304	8.0858e-07
[truncated: 14,956 more rows]

## Sheet: opc_de_cingulate
	logFC	logCPM	F	PValue
AC007325.4	0.124978	9.56939	26.3909	0.0071368
TCEAL3	-0.0861474	9.61371	6.54735	0.0920632
BEX2	-0.517725	9.69227	203.837	5.07948e-28
PGK1	-0.161183	9.64	20.429	0.0014453
TSPAN7	-0.217325	9.78416	35.996	5.97091e-07
TMSB4X	-0.872649	9.80842	589.117	3.34468e-103
MRPL41	-0.171631	9.58799	33.3813	0.000561388
GRIN1	-0.0019925	9.63331	0.00300904	0.96899
PTGDS	-0.17522	9.62132	22.3736	0.00057731
MAPKAP1	0.00377652	9.85315	0.0123392	0.926995
ATP6V1G1	-0.105777	9.63448	8.83817	0.0377647
HNRNPK	0.0594169	9.79565	2.74761	0.177272
RPS6	0.0106161	9.65803	0.0787789	0.83369
EIF3E	0.0191765	9.71709	0.259314	0.688358
CLU	0.146102	10.0551	23.338	2.35022e-05
NEFL	-0.236071	9.68341	38.3707	1.16305e-06
PTPRN2	-0.0848782	10.0369	9.50827	0.0133202
DYNC1I1	-0.0666209	9.73151	2.81094	0.154028
PURB	0.0147899	9.61295	0.199798	0.77349
PPIA	-0.42894	9.69947	135.614	8.38112e-20
CDK13	0.114931	10.0715	20.7281	0.000714559
NDUFA4	-0.504592	9.78832	190.839	1.08418e-32
RRS1	-0.00883607	9.53971	1.39397	0.737733
PSMG3	-0.0255642	9.56063	1.53077	0.559158
SYNE1	0.154094	10.149	43.9362	1.49436e-06
AL356599.1	0.0755465	9.67264	3.96105	0.132337
FAM110B	-0.0367803	10.1413	2.36124	0.244326
TSPYL1	-0.49069	9.66417	175.434	5.95348e-24
PPIL6	0.0420915	9.56761	3.15861	0.361222
HSP90AB1	0.140136	9.97036	18.9591	0.000166845
RPL10A	-0.217146	9.66907	33.6344	1.05969e-05
ATP6V1G2	-0.201188	9.5677	71.3121	1.38347e-05
ZKSCAN8	-0.135461	9.69422	13.4829	0.00511369
NOL7	0.112922	9.61313	11.4017	0.0287075
TUBB2B	-0.163667	9.67414	18.3271	0.000891118
FLOT1	0.048545	9.64839	1.76402	0.341545
CXXC5	0.0200981	9.6355	0.312466	0.695175
MATR3	0.0803931	10.054	10.034	0.0192591
VDAC1	-0.167829	9.68904	20.5302	0.000542666
MEF2C	-0.514359	9.822	210.05	1.90037e-36
SMN1	0.055	9.6264	2.44631	0.285827
TCEAL2	-0.357013	9.63395	102.302	1.08753e-12
SMN2	0.116953	9.63154	10.7928	0.0235751
SUB1	-0.210151	9.77228	34.0789	1.9251e-06
BASP1	-0.177325	9.89747	30.7431	4.70067e-06
RETREG1	0.0734688	9.64545	3.83446	0.151424
RPS20	-0.0758399	9.69383	4.03111	0.11883
CPE	0.00944319	10.0667	0.123838	0.779511
CISD2	-0.0349055	9.59226	1.32828	0.488152
HNRNPDL	-0.0543167	9.8749	2.70228	0.175336
TBC1D1	-0.0142169	9.70391	0.132837	0.768742
QDPR	-0.0023826	9.64068	0.0040512	0.962805
ADD1	0.144445	9.82874	17.2717	0.000748657
NSD2	-0.00263249	9.7681	0.00513001	0.953468
SLBP	0.800753	9.71167	372.909	1.3329e-54
IQCJ-SCHIP1	0.465664	9.8399	134.496	1.89014e-26
H1FX	0.0334308	9.59143	1.19814	0.506877
TCEAL6	-0.142003	9.58459	24.488	0.00407396
RAB7A	-0.0806495	9.8454	5.48689	0.0504185
FAM162A	-0.117075	9.61309	12.2039	0.0218296
SHISA5	-0.00136573	9.60202	0.00182028	0.978646
SETMAR	0.0108913	9.54324	1.13133	0.726255
PRKAG2-AS1	-0.159924	9.54743	137.41	1.11469e-05
DGCR6L	-0.0362412	9.56194	2.8812	0.413465
DGCR6	0.111981	9.57745	17.2991	0.0207957
SMIM11A	-0.0462043	9.59723	2.2111	0.361993
SON	0.114706	9.90025	12.4226	0.00386649
SOD1	-0.172231	9.71244	20.4763	0.000273058
SMIM11B	0.0524118	9.59258	2.96162	0.299296
TAF1	0.0142055	9.75104	0.143787	0.757752
CDH4	-0.112856	9.87299	10.4881	0.0047189
RPL32	0.0797413	9.75146	3.97679	0.0850274
BLCAP	-0.185305	9.64532	26.5024	0.000233385
NORAD	-0.320309	9.68735	73.6137	2.67539e-11
MAP1B	-0.243575	10.0982	76.5125	3.135e-14
PDRG1	0.0260192	9.5515	2.69163	0.500303
NSFL1C	0.0291458	9.61835	0.737384	0.571253
ITM2C	-0.4142	9.79623	133.051	1.18152e-22
RPL37A	0.113385	9.85807	10.3493	0.0062053
SPATS2L	0.218734	9.84504	37.2869	2.53682e-07
CHN1	-0.15562	9.93413	23.0345	3.2242e-05
RASGEF1B	0.518201	9.88333	190.12	8.82696e-35
ORC4	-0.00273869	9.84645	0.0060975	0.947374
CMSS1	-0.160942	9.64476	19.7949	0.00142378
RPL6	-0.119946	9.70959	9.62292	0.0118494
ANAPC16	0.428271	9.70696	119.4	1.11953e-17
DCTN2	-0.194678	9.65089	29.8908	0.000102998
SRSF5	0.110436	9.77515	9.24857	0.0146482
GPX4	-0.439422	9.66065	142.748	2.71885e-19
CCDC59	0.364234	9.64286	92.6157	3.09789e-12
TPT1	0.275814	9.74891	49.0356	5.35248e-09
MYL6	-0.241246	9.61839	49.0516	1.97936e-06
GTF3C6	0.0581104	9.59552	3.50733	0.25211
CWC15	-0.0273396	9.59514	0.78564	0.588857
BEX1	-0.631404	9.702	293.427	2.76039e-42
ATP6V1F	-0.265732	9.59096	76.7875	9.69193e-08
PSMC6	-0.00443032	9.64422	0.0149256	0.930767
FHL1	0.0542507	9.67132	2.13882	0.279604
PFDN5	-0.229107	9.65031	39.3606	4.67903e-06
ARF5	-0.0826734	9.54085	85.1991	0.00423536
MLLT11	-0.107919	9.59769	11.5628	0.0329215
RNPS1	0.0658902	9.65235	3.24826	0.196094
ZCRB1	-0.049976	9.56542	4.77267	0.272686
SSB	0.112736	9.65081	9.47881	0.0276218
DYNLL1	-0.290039	9.81917	64.4364	3.27184e-12
PFKP	-0.0658462	9.66123	3.11581	0.189353
COPS7A	-0.182414	9.58011	44.6122	0.000185341
SERPINI1	-0.386658	9.71641	105.48	7.42208e-17
TMEM120B	0.0752108	9.57399	8.44245	0.11514
UBE4A	-0.123842	9.7454	11.2066	0.00686129
NUCKS1	-0.139876	9.86633	17.8065	0.000489245
DNAJB6	0.385944	9.79045	108.877	3.01291e-17
NDUFC2	-0.237012	9.57698	74.602	8.97147e-07
CDC42	-0.33541	9.75025	86.4729	7.03867e-14
SUMO2	-0.0978209	9.64695	7.11647	0.0531764
RPL35	-0.159071	9.69311	17.5574	0.00100246
NDUFS8	-0.000552606	9.59481	0.00030967	0.991288
NRXN3	-0.104951	10.1605	12.8777	0.000685419
LDHB	0.0193211	9.77138	0.267883	0.668035
ISCA1	-0.00225942	9.63649	0.00404818	0.9648
FAU	-0.107716	9.71211	7.80931	0.0235758
RPL27	-0.139287	9.63913	14.7605	0.00600431
PLD3	-0.200719	9.755	30.7667	8.31123e-06
CELF1	-0.0917631	9.86043	7.6386	0.0236012
MPHOSPH10	0.0238223	9.59843	0.570707	0.639656
NDUFB10	-0.302803	9.60254	88.281	1.82347e-09
THYN1	-0.0170768	9.57511	0.423616	0.722209
LINC00294	-0.100879	9.55563	30.5482	0.0153971
C11orf58	0.00795307	9.70737	0.0449699	0.869102
HLTF	-0.148786	9.77093	17.5023	0.000811874
PSMA1	0.0204364	9.67051	0.280352	0.683247
HRAS	-0.0684935	9.56769	8.28758	0.138748
LRRC27	-0.00740847	9.57365	0.0834922	0.876634
MRPL57	-0.177639	9.58521	37.9763	0.000328383
COX6A1	-0.364638	9.65476	95.6682	1.60723e-13
THRA	0.207087	9.6971	29.7406	2.94879e-05
ZNF638	0.178048	10.2496	97.0707	2.18507e-09
ATP2B1	0.105585	10.0801	16.1043	0.00172266
PPT1	-0.0818004	9.622	5.6887	0.109897
RPS18	-0.184621	9.76444	23.6727	3.51033e-05
SCG5	-0.482262	9.67324	174.789	1.52297e-23
HSP90B1	0.170832	9.72221	19.9092	0.000390344
RPL19	-0.0722779	9.71055	3.4405	0.130458
YWHAG	-0.585654	9.74308	257.175	8.49366e-40
PFDN4	0.0221198	9.58109	0.629384	0.652374
RNH1	0.0257428	9.5902	0.730656	0.608408
RNF11	-0.133568	9.67918	12.9903	0.00654917
YTHDF2	0.165429	9.63375	21.5154	0.00139718
KCNAB2	-0.0662041	9.58642	5.14815	0.183215
ACTB	-0.304196	10.0403	114.02	1.1257e-19
RPL4	0.0286347	9.61851	0.673467	0.578003
ADD2	-0.10517	9.66646	8.01265	0.0347268
MRPL30	0.0240978	9.54157	7.375	0.401769
TESC	-0.0676256	9.54469	33.6598	0.0431929
SH3PXD2A	0.0219074	9.58597	0.560524	0.659879
AP2M1	-0.169381	9.66587	20.8899	0.000639218
ACBD7	0.0563166	9.53974	62.7676	0.0252287
CLDND1	-0.00098162	9.61297	0.000830387	0.984748
PFDN2	-0.116058	9.60777	12.5407	0.0227694
BTF3	-0.0855452	9.60922	6.47446	0.0939303
AASDHPPT	-0.0166669	9.6353	0.223724	0.744684
SGIP1	0.0785143	10.2565	16.8523	0.00736219
HSP90AA1	0.413627	10.1914	258.012	1.93878e-38
RPS5	-0.0636893	9.63387	3.06253	0.2123
SNX3	0.141849	9.72236	13.5777	0.00315068
YWHAH	-0.769404	9.67614	451.99	1.20683e-59
UBC	-0.0391432	9.74541	1.02016	0.396201
TPI1	-0.341668	9.62632	92.4173	1.16228e-11
EEF1A1	0.122262	9.85215	10.9116	0.00338401
FAM13A	0.176008	10.0195	38.1055	8.47083e-07
PPP2R1A	-0.0761675	9.66817	4.23787	0.126426
H2AFZ	-0.218174	9.60465	44.1667	1.64028e-05
C1orf216	-0.20376	9.5593	103.771	2.7737e-06
GPR162	0.120912	9.62434	12.0579	0.0194189
NFU1	-0.206995	9.61547	38.2455	4.64673e-05
SNCB	-0.279785	9.58863	86.928	1.70815e-08
SELENOW	-0.232688	9.78061	38.9406	9.78228e-08
ZNF252P	0.000214666	9.60672	4.23232e-05	0.996642
TKT	-0.0106405	9.61935	0.0947666	0.835905
CFL1	-0.235208	9.67243	38.382	1.65085e-06
CHD5	-0.00155855	9.59525	0.00242464	0.97543
TCEAL1	0.0901581	9.57954	10.8652	0.0649232
NPM1	-0.193019	9.66615	27.6164	9.68661e-05
RPL11	-0.0411135	9.73404	1.14451	0.378756
MECR	0.066433	9.59311	4.76829	0.188857
CSDE1	-0.0252971	9.72287	0.464768	0.593096
TAF13	-0.0580159	9.56293	7.23296	0.194572
CACUL1	0.0114333	9.72411	0.0913086	0.809484
RPL22	-0.0793545	9.65227	4.50108	0.115881
TIMM8B	-0.0499452	9.55693	6.76938	0.23618
ZSWIM7	0.00274246	9.60202	0.00728532	0.957141
C9orf78	-0.0208808	9.5708	0.71815	0.657257
MRPL33	-0.0787964	9.632	4.97956	0.122726
TRA2B	0.183949	9.74511	25.1938	9.27066e-05
AJAP1	0.542357	9.66296	191.224	3.5525e-25
PAPSS1	0.0528939	9.81779	2.21452	0.21838
RPL3	-0.290376	9.76821	59.7296	4.3611e-11
NCDN	-0.094115	9.61682	7.50569	0.0657067
DNM3	0.0382639	10.5139	10.0861	0.119423
BCKDK	-0.0935663	9.54831	43.565	0.011189
MRPL20	-0.0931689	9.58071	11.1678	0.057148
PITHD1	-0.328082	9.58757	128.747	3.16698e-11
ZNF429	0.032186	9.67955	0.747421	0.517424
RPS25	-0.104524	9.6927	7.18127	0.0314104
UCHL1	-0.298378	9.7802	65.9775	6.46966e-12
POLR2G	-0.01012	9.55923	0.249953	0.814466
UROS	-0.193697	9.60621	35.8261	0.000134625
SRP14	-0.0231507	9.7505	0.360697	0.614297
PEBP1	-0.312054	9.85463	79.6337	6.28346e-15
WIPF2	-0.086706	9.74172	5.39262	0.0602016
ESD	0.11059	9.60553	11.2802	0.0314086
PRDX5	-0.288939	9.61419	72.063	1.12391e-08
ATAD3A	0.0554492	9.56253	6.70092	0.210734
ENO1	0.0129056	9.74502	0.113298	0.780667
CCDC91	-0.0725731	9.97631	5.45117	0.0452934
RPS13	0.0344757	9.646	0.835931	0.499595
BZW1	-0.0278782	9.62887	0.629289	0.586541
ACTG1	-0.347965	9.79705	94.3555	2.52287e-16
UQCRB	-0.159191	9.68647	17.6033	0.0010751
MGST3	-0.230366	9.72365	37.9808	7.39129e-07
TOLLIP	-0.137706	9.60922	17.5126	0.006866
RAB2A	-0.111145	10.0229	17.3109	0.00133032
SDHB	0.0199356	9.61455	0.343899	0.698224
PSMD4	0.0144576	9.62043	0.174311	0.778674
CYC1	-0.174341	9.57948	38.6471	0.000345109
DPF1	0.145015	9.62082	17.6037	0.00511052
PSMB4	0.0474809	9.59914	2.24057	0.351524
BBS4	-0.0417207	9.64776	1.30991	0.411074
HINT1	-0.505853	9.66328	190.732	2.32823e-25
RPS27	-0.0730918	9.73721	3.40012	0.115363
IRF3	0.0597462	9.55731	9.81241	0.154099
PRDX6	0.127674	9.59249	17.3654	0.0115746
GRM2	0.010383	9.53634	6.42208	0.584555
MRPS14	0.0291332	9.57262	1.33854	0.539351
ANKRD2	0.0215597	9.5351	67.3355	0.141113
RTN1	0.0184175	10.0426	0.405922	0.593116
CYFIP2	-0.00366614	9.89744	0.0137295	0.925771
HSBP1	-0.0014109	9.63058	0.00159511	0.978073
PSAP	-0.12527	9.92679	15.9213	0.000921865
MAP1LC3B	0.182759	9.65713	23.7966	0.000359107
ST6GALNAC4	-0.0112698	9.54481	0.94511	0.733769
RTP1	-0.0226097	9.53374	343.909	0.0294489
DYNC1LI1	-0.0692109	9.66224	3.53779	0.167265
ARHGAP32	-0.00944754	10.1018	0.146903	0.772668
SNRPN	-0.0798452	9.63301	4.58869	0.117657
SNX10	-0.149541	9.6556	16.4797	0.00283918
HLA-B	-0.00792022	9.59815	0.05887	0.876153
TMCC2	0.0141744	9.5565	0.580134	0.73398
NDUFS5	-0.231593	9.67576	37.5787	2.22093e-06
RTL8C	-0.193664	9.60171	36.1659	0.000129301
APOE	-0.119584	9.69123	9.12877	0.0138544
BROX	-0.0577088	9.66395	2.39642	0.249228
TRIR	-0.0178373	9.59744	0.321222	0.725232
PPA1	-0.0837844	9.65184	5.15637	0.0968985
GPRASP2	-0.0735655	9.55968	13.2185	0.0906453
SLC29A3	0.0670503	9.57027	7.5892	0.15214
PREPL	-0.207996	9.78054	33.6399	1.98352e-06
PDCD2	0.0613397	9.56954	6.53757	0.188346
LIPA	0.0462513	9.61484	1.764	0.369046
CMAS	-0.134077	9.60086	17.8835	0.00817434
TSC22D1	0.0265534	10.1856	1.28889	0.387273
CALM1	-0.467466	10.141	336.954	2.29727e-53
SPINT2	-0.256304	9.59782	67.7293	3.44302e-07
NDUFB1	-0.296907	9.62101	75.726	4.2826e-09
SH3BGRL3	-0.0183852	9.54819	1.67763	0.613215
RPS7	-0.272743	9.68726	52.8264	1.56685e-08
SPIN3	0.133445	9.68123	12.1602	0.0076492
FSTL5	0.0468284	9.58218	2.58639	0.341984
RAB1A	-0.0869538	9.74892	5.65453	0.0574539
FAM204A	-0.107592	9.67917	8.51705	0.0288215
MEG3	0.179614	10.2156	63.501	3.96184e-09
CRIP2	-0.143601	9.57082	32.8829	0.00229172
SF3B3	-0.105767	9.65126	8.62451	0.0359153
PKM	-0.123516	9.73026	10.816	0.00801504
PSMC5	-0.0944387	9.60107	8.66079	0.0629704
RCN2	-0.101203	9.92868	11.3692	0.00745652
RPS14	-0.18132	9.73471	22.2604	8.50394e-05
RABAC1	-0.218285	9.60202	44.4572	1.5718e-05
RPS17	-0.0757743	9.54134	54.8102	0.0102944
SNCA	-0.134178	9.81378	13.31	0.00156826
NME4	0.0760914	9.57078	9.55322	0.105026
FBXL16	-0.0532004	9.59623	2.91349	0.29318
BEX4	-0.348736	9.66518	91.7239	1.13683e-12
CALM3	-0.990488	9.67846	788.433	1.96245e-100
ANXA2	-0.00890335	9.53704	3.17715	0.674566
BAIAP3	-0.0450191	9.54013	31.8808	0.101732
PPP1R1B	-0.0468496	9.55339	7.37362	0.24403
ELOB	-0.217083	9.63699	35.6863	1.72189e-05
CNTNAP1	-0.0793796	9.56281	13.4849	0.0758325
SNN	-0.278707	9.57533	116.199	5.94648e-09
RPL12	0.0163116	9.64834	0.189278	0.74875
C16orf45	0.351377	9.89561	107.378	8.18675e-18
FOXP4	-0.026263	9.59285	0.750604	0.602385
ALDOA	-0.690434	9.74166	349.63	3.55302e-55
PSRC1	0.0695772	9.56604	9.33639	0.126525
HPCAL1	-0.128643	9.64548	12.3717	0.0109135
TRIAP1	-0.0546385	9.54242	30.4545	0.0757319
FBXL19	-0.078564	9.59892	6.28206	0.121381
AP2S1	-0.262952	9.58069	89.6397	6.96447e-08
MT1G	0.391552	9.58549	167.974	2.67359e-15
PAFAH1B1	-0.0809247	9.96134	7.85658	0.0275838
DGKZ	-0.170132	9.60403	27.7818	0.000797504
RABEP1	0.113625	9.7782	9.55131	0.0117688
SOX15	0.0347887	9.54735	6.68251	0.322984
SRRM3	0.236654	9.6218	43.7867	5.40524e-06
EIF1	-0.189397	9.76135	24.7089	2.32047e-05
G6PC3	-0.0467154	9.56277	4.52984	0.29541
NSG2	-0.145871	9.835	17.8379	0.000431184
NSF	-0.0827319	9.90239	6.47483	0.0333317
GAP43	-0.338405	9.71563	78.1338	3.66772e-13
DDX5	0.266703	10.0549	100.028	2.5501e-14
KCND2	0.0377772	10.708	9.869	0.0847636
ARPC2	-0.170203	9.68087	20.8921	0.000501995
RPL38	-0.0870486	9.68529	5.11837	0.0756672
WBP2	-0.103065	9.64556	8.18077	0.0417493
QKI	0.0723159	10.7209	53.3254	0.000928684
AC016588.2	0.00212558	9.53827	0.122656	0.928197
APP	-0.0966771	10.2905	30.4666	0.000577487
OAZ1	-0.293876	9.7174	60.4849	2.92878e-10
RPS4X	-0.303567	9.67387	65.727	4.87617e-10
RTN4	-0.105276	10.0707	17.5373	0.00154351
PPDPF	-0.21025	9.578	58.9099	1.42352e-05
ARF3	-0.407534	9.60522	160.853	4.49781e-16
THOP1	0.0624851	9.57901	5.34451	0.200023
LGALS3	0.104917	9.54563	81.7699	0.00127473
EEF2	-0.0807812	9.69627	4.58078	0.095687
UBL5	-0.262111	9.62829	53.9577	2.17189e-07
CLIP2	0.0160255	9.90914	0.237685	0.681024
PIN1	-0.270339	9.60703	66.9663	8.94427e-08
RPL13A	-0.102104	9.7418	6.95078	0.0266881
AL078621.3	-0.00848315	9.53555	6.30529	0.623012
RPS11	0.0229544	9.67357	0.366458	0.645898
EPDR1	-0.166781	9.56529	53.9991	0.000254748
ZNF814	0.151088	9.66036	16.6833	0.00304166
ITGB1BP1	0.020909	9.62165	0.362501	0.684503
GPM6A	-0.0564167	10.5218	20.4172	0.0198167
VSNL1	-0.484414	9.70282	162.022	3.63997e-25
SLC25A4	-0.316102	9.61819	85.8747	3.91868e-10
STMN1	-0.644563	9.71018	302.165	7.65368e-45
CALM2	-0.436574	9.9234	183.792	3.11698e-32
PIK3R1	0.000294626	10.2697	0.000239078	0.991846
PRKCB	-0.25484	9.88226	54.1105	6.92585e-11
OIP5-AS1	-0.0110909	9.77237	0.0939152	0.804845
BCYRN1	0.089064	9.58476	6.86751	0.0728891
RPS27A	-0.315131	9.75677	70.5515	1.49118e-12
DYSF	-0.0184671	9.54522	2.28096	0.582827
TMSB10	-0.872437	9.72792	562.244	3.70426e-86
MOB1A	0.186371	9.63762	26.945	0.000318496
PNMA6A	-0.121319	9.54987	63.3629	0.00148146
IDS	-0.223612	9.78485	35.8373	2.69971e-07
HS6ST2	-0.123026	9.75384	9.74054	0.00671027
NDUFA1	-0.275952	9.6308	61.0402	4.56324e-08
FAM199X	-0.0344803	9.6622	0.894418	0.492519
TCEAL7	-0.362143	9.5821	168.283	1.12422e-13
ARMCX1	0.0508013	9.5691	4.45591	0.274856
PCSK1N	-0.297566	9.7696	62.4118	1.29875e-11
RPL9P7	-0.0324427	9.53884	19.6403	0.198106
HDHD3	-0.0293199	9.54775	4.58183	0.416305
CTSL	-0.111106	9.58071	16.0133	0.0232571
YWHAZ	-0.544193	9.81108	252.924	7.78304e-40
SNX16	0.00412164	9.59473	0.0179219	0.935088
FABP5	-0.0221954	9.59317	0.51444	0.65995
ATP6V1H	-0.0385914	9.7644	1.0885	0.392968
AC120036.4	-0.0520044	9.55255	9.71778	0.190413
PPP2CB	0.320985	9.68735	70.1485	2.06583e-10
DPYSL2	-0.161771	10.0644	38.5238	1.14128e-06
AC090114.1	-0.031159	9.53698	38.0071	0.146432
RUNDC3B	0.226196	9.62049	39.6999	1.35875e-05
PCLO	0.0392155	9.77904	0.991423	0.380997
CHCHD2	-0.415858	9.65366	131.32	3.31979e-17
STMN2	-0.543354	9.69962	207.587	2.91833e-31
YKT6	-0.0754549	9.56264	12.1671	0.0910016
SOD2	-0.076471	9.68037	4.20287	0.120694
GTF2H5	-0.11369	9.58167	16.6052	0.0205809
PCMT1	-0.189287	9.68342	25.7891	0.000102299
LMBRD1	-0.00272311	9.83296	0.00616242	0.948402
RPL7L1	-0.0302744	9.63081	0.739029	0.554499
TUBB2A	-0.712229	9.66173	381.26	1.13707e-49
CPEB4	0.139994	10.231	48.9676	3.16093e-06
ATP6V0E1	0.00666414	9.64432	0.0331884	0.896078
PDP1	-0.191427	9.58321	46.1026	9.99432e-05
RPL10P9	-0.475781	9.57172	355.106	3.26147e-24
SLC6A7	-0.0715715	9.54308	46.7947	0.0239625
CXCL14	-0.159925	9.56937	42.1936	0.000621457
UQCRQ	-0.226422	9.59127	53.9642	5.78302e-06
REEP5	-0.0188667	9.67159	0.252918	0.705334
AC093591.1	0.0176687	9.53538	31.9296	0.265222
GAR1	0.0561065	9.55381	10.6456	0.160112
FAM47E	-0.097564	9.54782	50.3934	0.00753158
SEL1L3	-0.198149	9.7796	30.1218	6.13876e-06
SSBP1	0.0163003	9.72249	0.190017	0.731605
LETM1	-0.0529367	9.59999	2.76934	0.297626
HES1	-0.38033	9.56094	324.772	5.62738e-18
NDUFB5	-0.236618	9.62581	47.2071	3.02593e-06
EIF2A	0.124263	9.57709	22.2192	0.0101787
PHACTR1	-0.092726	9.96461	8.45088	0.011241
LPP	0.0189772	10.3388	1.18931	0.489745
PODXL2	-0.0441246	9.65813	1.43232	0.381023
TPRA1	0.0167773	9.57103	0.458762	0.721609
LSAMP	-0.000400699	10.9106	0.0018166	0.983619
RPL14	-0.145674	9.69233	14.4797	0.00263582
CHL1	0.0315122	10.4074	4.3364	0.230379
ZNF483	-0.0835468	9.80262	5.45664	0.0528249
XRCC6	-0.00463784	9.64803	0.0160625	0.92737
CSNK1E	0.229927	9.68835	36.584	4.41408e-06
LGALS1	-0.211296	9.56754	77.3173	4.88791e-06
TIMP3	0.0266135	9.64962	0.523342	0.601239
DRG1	-0.0646747	9.60933	3.79777	0.205847
NOL4L	-0.0428486	9.64481	1.35209	0.39937
FTH1P10	-0.0511872	9.54135	27.9513	0.0811075
MTERF4	0.14114	9.585	24.6258	0.00451374
COPS9	-0.188914	9.61715	30.1536	0.000204754
PTMA	0.0621811	9.7835	2.65035	0.163591
SP100	-0.193764	9.55594	88.0619	3.85164e-06
SERPINE2	-0.0984618	9.91767	9.91282	0.0100317
C2orf69	0.0802661	9.60237	6.28944	0.116918
HIBCH	0.361333	10.0125	146.636	7.04062e-23
KIF5C	-0.0477111	9.89883	2.23112	0.222897
CCDC115	-0.0793742	9.55472	19.5439	0.0534167
RPL31	-0.0450533	9.65798	1.3749	0.371119
MGAT4A	-0.0969274	9.73431	6.72054	0.037025
COX5B	-0.288815	9.64851	60.882	7.17075e-09
BCAP31	-0.0658487	9.58677	4.99829	0.185927
RPL13AP25	-0.0699836	9.54231	40.2553	0.0228654
HCN1	0.0628659	9.61065	3.33725	0.221792
NUDT4	-0.158773	9.62001	21.8417	0.00183471
TIMM13	-0.173617	9.58091	38.7505	0.000386998
LGMN	0.0302401	9.58639	1.07451	0.543992
HIKESHI	0.0337326	9.64764	0.856447	0.508451
GRIA3	-0.025473	10.0798	1.04614	0.443615
SYT17	0.154769	9.88584	21.5752	0.00012976
STARD3	0.0765553	9.57341	9.05271	0.107787
MTCH1	-0.193567	9.68225	26.9492	7.20028e-05
PAPOLG	0.00253666	9.62363	0.00529661	0.960641
AP003170.4	0.000375481	9.53318	0.880342	0.944069
EMC9	-0.00834921	9.54908	0.332378	0.82162
TUFM	-0.00214091	9.60776	0.00412509	0.966677
VBP1	-0.062675	9.60993	3.55842	0.220372
PSMB5	-0.0856551	9.59421	7.63175	0.0893318
SBNO1	0.00147407	9.73567	0.00155275	0.974864
AC064799.1	-0.0702511	9.5532	14.6827	0.0804693
HIP1R	0.157259	10.0986	41.7452	2.42274e-06
CHPT1	0.398821	9.74856	109.741	7.49802e-17
POLR2D	-0.196053	9.57648	56.0575	4.75886e-05
DNAJC4	0.0153815	9.55161	0.934613	0.691418
AL118558.4	-0.0147392	9.53378	134.794	0.158177
GLRX5	-0.0444155	9.57966	2.62456	0.363255
UBE2B	0.317472	9.77142	72.4313	7.17691e-12
AL035071.1	-0.133182	9.55004	75.7826	0.000511444
B4GALNT1	-0.0759668	9.54844	27.9752	0.0395567
RPS29	-0.0324702	9.70867	0.718031	0.499136
KIF5A	-0.398898	9.71968	113.413	5.46469e-18
HCFC1	-0.00481829	9.56606	0.0446451	0.916032
RPL21	-0.230048	9.76321	37.4685	2.37057e-07
KLRG1	0.111024	9.61844	10.312	0.0317195
PIANP	-0.200234	9.60569	38.4889	7.84882e-05
NDUFS4	-0.172262	9.76334	22.5004	0.000117179
ZFP28	0.0377706	9.56279	3.14184	0.395556
NRGN	-0.743138	9.69671	401.97	5.23676e-58
CCDC82	0.00405666	9.6805	0.011843	0.934778
GMFB	-0.180508	9.58887	37.8637	0.000291051
DYNLRB1	0.0495531	9.67886	1.69542	0.319899
HNRNPC	0.00640841	10.0929	0.0676046	0.845968
AC113935.1	-0.0210826	9.58251	0.512785	0.668902
HSPA8	-0.217182	9.73255	32.7799	2.4892e-06
SCAF1	0.0633763	9.57682	5.73009	0.189932
RAD54L2	-0.287248	9.73022	59.4094	4.21234e-10
EPHX1	0.126093	9.59383	16.4978	0.0128579
ISCU	-0.19737	9.60451	36.33	9.84157e-05
C2CD2L	-0.0215399	9.55188	1.74887	0.582142
BRSK1	0.0294911	9.6025	0.848937	0.563911
NSG1	-0.315874	9.55178	378.641	1.67715e-15
VAMP2	-0.378043	9.79368	105.55	6.11008e-19
TPM3	-0.26692	9.61668	63.1289	1.37286e-07
GSTM3	0.136029	9.58531	22.4474	0.00624648
SLIT1	-0.0421629	9.71429	1.22826	0.376902
EIF1B	-0.0926744	9.62688	7.02409	0.0696986
TTC3	0.00166634	10.2424	0.00837753	0.954734
RPL18	-0.0581304	9.76698	2.32664	0.19616
CCT3	0.433335	9.7088	124.714	4.18234e-18
CSNK2B	0.0445781	9.55922	4.78059	0.299048
ASPHD1	-0.208873	9.55612	125.466	6.78321e-07
PCSK2	0.0442469	9.69436	1.2587	0.367104
ZNF271P	0.135683	9.63643	14.0323	0.00859774
HIGD1A	-0.124377	9.5615	34.0814	0.00497524
NDUFB8	-0.187854	9.58783	39.1637	0.000157545
TIPIN	0.00435448	9.59035	0.021207	0.930927
AFG3L2	-0.127962	9.61974	14.1606	0.0121823
RPL9	-0.334952	9.7313	82.0117	2.51009e-13
CRYAB	0.463341	9.60451	177.791	3.5265e-19
NDUFS2	-0.06666	9.62893	3.64524	0.192425
SARAF	-0.0603744	9.79299	2.75195	0.167049
MORF4L1	0.000202978	9.77243	3.11538e-05	0.996382
S100A6	-0.251524	9.59222	67.6026	4.78077e-07
RPL13AP5	-0.0049038	9.53964	0.39484	0.851542
AC024293.1	-0.0586844	9.54278	30.7874	0.0603241
CCK	-0.976949	9.70654	679.972	1.16829e-103
YAF2	0.274828	9.92747	70.3446	2.71096e-12
USP14	0.00917821	9.71107	0.0599354	0.848624
ERI3	0.109854	9.79531	9.38266	0.0130671
RSU1	-0.226292	9.66416	35.2672	4.81066e-06
SARS	-0.117656	9.64956	10.3755	0.0196614
RPS21	-0.0601709	9.67574	2.47874	0.224653
AKR1A1	-0.131096	9.57633	24.3968	0.00656931
APH1A	-0.14644	9.56352	44.5729	0.00114386
CDC5L	-0.124587	9.66507	11.5435	0.0123573
PMVK	-0.0180295	9.57876	0.439808	0.711306
ATP6V0B	-0.181593	9.6506	24.0971	0.000296333
SNX7	-0.0641639	9.74118	3.01207	0.165361
ERCC1	-0.00286372	9.59984	0.00827907	0.955152
RSL1D1	0.041869	9.58025	2.30922	0.392593
ARFIP2	-0.0163735	9.55715	0.730698	0.697763
OSCP1	-0.0652731	9.54957	19.3546	0.0836529
PGAM1	-0.384701	9.64856	114.109	8.75047e-15
HSPA9	0.36279	9.69032	90.3637	7.01637e-13
TOP2B	-0.018532	9.81616	0.28137	0.664782
RTN4R	-0.0965067	9.54324	83.2112	0.00260019
PPP1R12A	0.0120148	10.1595	0.291775	0.701032
OPTN	-0.154673	9.60997	21.4981	0.00238063
ADCK1	-0.18845	9.60954	33.2978	0.000208559
CKB	-0.199949	9.84064	30.2185	1.07704e-06
PHKG2	-0.0461996	9.56019	5.03659	0.289691
TOMM20	-0.369939	9.68425	101.764	1.38071e-14
PRAF2	-0.0466065	9.55271	7.59293	0.241566
HK1	-0.00449408	9.6261	0.0162039	0.930263
TRUB1	0.0533699	9.62658	2.33285	0.300297
TALDO1	0.0385221	9.61936	1.22214	0.454487
LAMA4	-0.334689	9.80526	96.0819	1.94072e-15
CDC42SE2	0.0582484	9.80695	2.60646	0.180554
SUPT16H	0.0304108	9.62862	0.745169	0.554378
MRPL32	-0.0523184	9.58088	3.54063	0.286012
SAP18	-0.0549427	9.61177	2.66099	0.283164
VDAC2	-0.0436982	9.6528	1.42738	0.387573
SPCS1	-0.308719	9.58887	108.492	4.7462e-10
RPS24	0.0115189	9.75461	0.0900994	0.801684
PACSIN2	-0.00874277	9.7012	0.0535919	0.856967
AARS	0.0711227	9.65364	3.70766	0.162669
CCDC186	0.0558529	9.66251	2.23302	0.269229
TIGD5	0.00357007	9.54752	0.0707263	0.920177
GREM2	-0.0518046	9.54379	22.3032	0.109505
BORCS8	-0.172578	9.55392	97.8154	2.40537e-05
CHGA	-0.108528	9.5729	17.7145	0.0225145
SLC7A8	-0.111771	9.56027	28.7461	0.0106937
GTF2A2	0.0269668	9.58383	0.89692	0.585957
AC245140.2	-0.00220035	9.53515	0.584348	0.889292
SCRN1	0.100466	9.74096	7.28368	0.0322602
PHF21A	0.173162	10.0457	39.898	7.13495e-07
OTUB1	-0.193088	9.57774	52.5998	6.6699e-05
BORCS7	-0.0496687	9.56982	4.13909	0.288868
SYNGR1	-0.151617	9.70348	17.2012	0.00153369
RPS15A	-0.0664801	9.61062	3.78286	0.193662
NUS1	0.0179037	9.64117	0.248722	0.726315
LMAN2	-0.0147256	9.58135	0.279041	0.764386
CA10	-0.037176	10.5354	6.60276	0.12234
GNAS	0.0569158	10.0513	4.54701	0.0974868
SCAMP5	-0.12433	9.70185	11.0709	0.00965127
KIF1A	0.0971388	9.70595	6.44646	0.0460416
NR2F6	0.123003	9.56391	31.8772	0.00581689
RPL28	-0.0258949	9.73592	0.461794	0.579027
NME3	-0.00337015	9.67286	0.00812918	0.946168
RPS2	-0.0390751	9.72766	1.01113	0.406206
SYNGR3	-0.155615	9.55799	62.803	0.000283923
ZNF385A	-0.0347282	9.5406	17.4671	0.21652
METTL9	-0.135965	9.63032	14.9044	0.00756738
MCOLN1	0.132886	9.55623	53.915	0.00115052
TSC1	0.00432618	9.75976	0.013963	0.92437
TERF2IP	-0.0648359	9.74498	2.989	0.159189
ACTR2	0.0217843	9.6834	0.340474	0.659883
NLRP1	-0.342849	9.62074	101.731	1.05203e-11
PFN1	-0.0673907	9.56997	7.34141	0.150535
FAM49A	-0.26001	9.74205	50.8322	1.08316e-08
C1QBP	-0.0067654	9.58354	0.0551184	0.891184
LDLR	0.112119	9.56863	22.2106	0.0153601
Z74021.1	-0.0154622	9.53384	119.778	0.152392
TXNDC17	0.0129008	9.55272	0.592959	0.744033
KRT10	-0.0262415	9.5874	0.79222	0.598957
ZFP82	0.11406	9.62365	10.6562	0.0274078
TUBG1	0.00871114	9.54738	0.422333	0.805974
SUV39H1	-0.0696623	9.53676	211.062	0.00113966
CACYBP	0.390685	9.64489	111.267	7.81875e-14
PRMT1	0.084576	9.60226	6.93023	0.0985438
HDAC5	0.122553	9.65457	11.1415	0.016453
TCEAL5	-0.168408	9.57979	37.5669	0.000553754
SEC62	-0.199132	9.7595	29.0535	8.85213e-06
MYDGF	-0.0848228	9.58441	8.67629	0.0865179
NAA10	0.0438686	9.57204	3.03529	0.353788
FXYD6	-0.0484948	9.68134	1.51574	0.325645
ZNF470	0.0869546	9.56837	13.3928	0.0600202
GAS7	-0.266502	9.62798	56.2035	1.35196e-07
METTL23	0.0455477	9.56719	3.78473	0.321706
ITM2B	-0.0594138	9.93031	3.33259	0.117085
CES4A	0.020172	9.56334	0.84673	0.651892
IER3IP1	-0.0235177	9.55729	1.50277	0.577825
RPL10	0.00864504	9.78243	0.0515399	0.845821
GCA	-0.125652	9.55609	45.4327	0.00272741
ST8SIA3	0.174844	9.62478	24.462	0.000750639
ABHD17A	0.0336349	9.59846	1.15708	0.508746
CHML	-0.145434	9.54724	116.647	5.88399e-05
LSM7	0.085059	9.60266	6.92239	0.0967656
RPL36	-0.0874323	9.69898	4.99968	0.0704035
DYRK1A	0.0280188	9.98824	0.932679	0.43904
ILF3-AS1	0.0429	9.57609	2.64418	0.373589
ASNA1	-0.00198804	9.56111	0.00877466	0.963889
HSDL1	-0.0670197	9.59538	4.7792	0.184734
IER2	-0.0977953	9.54822	47.8316	0.00792146
VSTM2B	0.290482	9.74029	57.6524	1.18797e-09
COX7A2L	-0.171605	9.62026	25.0273	0.0007515
C19orf53	-0.125778	9.58388	19.193	0.0108502
TECR	0.113951	9.64439	9.34204	0.0265691
DDA1	-0.0988907	9.5707	16.3026	0.0356301
RPL18A	-0.00601803	9.67403	0.0243787	0.903891
SYMPK	-0.0123913	9.71432	0.111403	0.795583
TMEM59L	-0.348088	9.67846	89.597	6.47555e-13
TRIM37	-0.116458	9.74642	9.87423	0.0109696
PPP1R37	-0.0529367	9.5506	11.6611	0.168256
ANKMY2	0.122306	9.66013	10.8356	0.0162386
PNMA8A	-0.0991941	9.59284	10.8877	0.0485708
PNMA8C	-0.247508	9.56091	140.005	2.01663e-08
TMEM160	-0.440759	9.60845	181.49	1.46588e-18
FTL	-0.107784	9.89742	8.75984	0.00569372
C2orf68	-0.0371705	9.64233	0.990839	0.465575
SIK3	0.109677	10.3501	44.8332	6.76585e-05
SLC17A7	-0.245006	9.6171	51.568	1.36217e-06
GTF2I	0.199063	10.0591	61.589	8.99653e-09
KLK7	-0.0401816	9.53933	31.0734	0.124581
TAPBP	-0.224405	9.71022	37.5328	2.0361e-06
PEA15	0.0348326	9.66098	0.859528	0.490669
COX4I1	-0.352844	9.69161	87.0553	1.46864e-13
SUPT7L	0.0458673	9.58072	2.79452	0.349744
RPL9P9	-0.102172	9.55327	31.8102	0.0113053
URI1	-0.131681	9.90788	16.5674	0.000624292
C1D	-0.0216007	9.61832	0.399325	0.673944
WASH6P	0.0218572	9.55345	1.61413	0.584039
RPL39	-0.0433173	9.6445	1.35093	0.394324
COX7B	-0.337903	9.64201	89.168	1.36628e-11
SYN1	0.101025	9.66109	7.2837	0.0466196
SLC25A6	-0.266015	9.6161	61.1801	1.51514e-07
ASB6	0.00241155	9.56215	0.0128081	0.956594
FRRS1L	-0.149699	9.68809	15.9367	0.00208386
DIRAS2	-0.290863	9.59434	90.5407	6.03074e-09
RORB	-0.155884	9.56394	48.0263	0.000557822
WASHC1	0.0475298	9.61524	1.99933	0.35603
ENY2	-0.0281576	9.61642	0.687405	0.583187
PLGRKT	-0.153923	9.6212	19.8174	0.00252686
NEFM	-0.191374	9.62258	29.5133	0.000167444
RHEB	-0.0412779	9.68437	1.19714	0.401651
FAM3C	-0.192369	9.67895	27.3806	8.42853e-05
RPS3AP26	-0.01505	9.53409	75.8179	0.211442
RPS3AP25	-0.0167152	9.53608	17.5759	0.378155
BEX3	-0.534893	9.72625	208.9	4.49387e-32
APTR	0.200981	9.61455	34.7777	0.000106069
C7orf50	-0.157896	9.64615	19.5359	0.00173831
PRKAR1B	0.0552682	9.78656	2.36181	0.213836
C6orf203	-0.0542603	9.57249	4.63352	0.253097
HMGN3	-0.0852897	9.67696	5.07577	0.0842907
BEND6	-0.206264	9.68595	29.4411	2.14098e-05
CUTA	-0.0624123	9.59036	4.12761	0.213276
QRSL1	-0.00919951	9.62703	0.0692088	0.857788
MCUR1	-0.169843	9.57739	40.3006	0.000447763
LYRM4	-0.0269113	9.78156	0.525413	0.544206
ECI2	0.041864	9.55624	5.0465	0.31243
AC140125.2	-0.0519952	9.53538	248.51	0.00298092
PDLIM7	-0.00422071	9.54573	0.117699	0.901248
KIAA1191	0.0351107	9.58025	1.64639	0.473416
AC139491.1	0.000638867	9.53574	0.0321526	0.971037
LNPEP	-0.0424621	9.72044	1.29186	0.370351
KIF2A	0.013879	9.90411	0.194595	0.723067
MAP9	-0.0354418	9.60233	1.21915	0.486825
RPS3A	-0.179278	9.6841	22.4841	0.000233755
CCNI	-0.230526	9.79383	42.5673	8.39933e-08
PGRMC1	-0.276789	9.72527	56.2392	2.22454e-09
TMEM165	-0.13926	9.77508	14.1022	0.00165363
OPA1	0.200595	9.75613	28.9106	1.65374e-05
PFN2	-0.517573	9.6294	229.749	2.54071e-25
ATP1B3	0.0204068	9.6813	0.289993	0.680741
ZCCHC10	0.00437247	9.59488	0.0200724	0.931161
COX17	-0.105815	9.59464	11.7407	0.0358112
ZNF786	0.0297469	9.56669	1.65338	0.51636
PSMD6	-0.0276012	9.58444	0.935271	0.577489
SEC13	-0.0275003	9.60396	0.723324	0.590108
BRK1	-0.155023	9.61499	20.7475	0.00235186
CRELD1	0.361114	9.64636	96.2435	4.37509e-12
MLC1	-0.134917	9.54707	101.884	0.000179723
CD99L2	-0.231703	9.69366	38.6712	1.42963e-06
SNU13	-0.232763	9.60598	51.4499	4.28225e-06
UQCR10	-0.248833	9.63495	47.9491	8.16172e-07
XBP1	0.13479	9.56158	42.4503	0.00198266
S100B	-0.265954	9.76114	52.57	2.26606e-09
PIGP	0.147112	9.58297	27.1217	0.0029009
SLC13A3	-0.0480641	9.60073	2.19539	0.344738
RBM39	-0.000390867	9.98102	0.000191437	0.991447
MAP1LC3A	-0.360154	9.60262	125.224	7.39384e-13
CST3	-0.116479	9.9011	9.81699	0.00268997
MORF4L2	0.119482	9.72415	10.0797	0.0125367
COPS7B	-0.0288158	9.59406	0.889809	0.568275
SRI	0.154831	9.66736	16.6138	0.00226815
PPP2R2C	0.0434071	9.68467	1.27147	0.380784
MZT2A	-0.16448	9.6063	24.9585	0.00120708
HSPE1	0.34387	9.6394	85.762	4.58843e-11
MZT2B	-0.245186	9.62854	49.02	1.2674e-06
RMND5A	0.0266805	9.6588	0.491706	0.59796
PPP3R1	-0.339163	9.57755	165.955	1.92971e-12
MAPKAPK5-AS1	-0.024434	9.56221	1.29847	0.58205
ATP2B1-AS1	0.0515667	9.57161	4.32057	0.274549
SEZ6L2	-0.231497	9.64328	40.1568	4.12946e-06
RND1	-0.0987833	9.54931	43.7894	0.00875657
RPL41	-0.319461	9.8224	77.7752	1.18706e-14
IGSF21	-0.0923651	9.98594	10.5921	0.0100142
MAGEH1	-0.0880067	9.58613	9.09432	0.0765103
RPL5	0.0417691	9.6985	1.18076	0.392439
SYT10	-0.0646332	9.54043	61.1512	0.0216851
ST13	0.405893	9.76781	113.438	4.92667e-18
EVL	-0.00138346	9.81558	0.00150084	0.974241
SECISBP2L	0.111691	9.77981	9.33841	0.0131047
ENO2	-0.496091	9.65511	191.029	4.24772e-24
AC215219.1	0.114687	9.60518	12.4124	0.0256233
APLP2	-0.116968	9.77912	10.4693	0.00806189
MAOB	-0.0904943	9.59984	8.01105	0.0745136
RPA3	-0.071681	9.54521	34.7721	0.0349968
THY1	-0.302262	9.7053	63.1029	1.54535e-10
ISY1	-0.00245442	9.54546	0.0419995	0.941983
ATP1B1	-0.716243	9.83043	405.179	3.5196e-72
WIPF3	-0.0401736	9.56841	2.72415	0.387036
CHORDC1	0.690159	9.80674	317.046	4.02496e-50
HACD3	0.0842873	9.71003	4.92653	0.0818086
COA5	-0.00272389	9.58504	0.00910661	0.956246
PLEKHB1	0.0692435	9.61679	4.06912	0.179355
TMEM147	-0.0788696	9.57241	9.28918	0.096564
PEX16	-0.0860459	9.5515	28.1698	0.0280643
GSTP1	-0.0960813	9.60114	8.67979	0.0585259
AQP4	0.158956	9.61086	20.6702	0.00209536
BDNF	-0.0661978	9.5392	84.3896	0.0115636
2022-09-04	-0.0502903	9.56203	5.41579	0.257086
AC116533.1	0.0108413	9.54244	1.12344	0.71879
PSMB7	-0.0831872	9.67787	4.97935	0.091998
PPCS	-0.0946927	9.55742	24.203	0.0259122
ATP6V0D1	-0.241071	9.61073	52.9885	1.98255e-06
SYT1	-0.26472	9.98562	65.7716	6.60573e-14
DCAF10	0.170964	9.59263	32.3566	0.000730604
DKK3	-0.187919	9.6962	24.3938	9.3253e-05
NUDC	0.0943117	9.64572	6.65564	0.065875
EIF4A2	0.144623	9.73952	14.5318	0.00217299
RPLP2	-0.0193313	9.68853	0.245334	0.693808
CEND1	-0.233415	9.62143	45.311	4.21239e-06
INPP4A	0.0822698	9.74318	4.79622	0.0783399
PRPSAP2	-0.123105	9.67993	10.9415	0.0122167
TRMT112	-0.0307825	9.57066	1.51652	0.512791
ADPRHL2	0.167742	9.57589	40.8159	0.000480503
RPL34	-0.0469425	9.74648	1.42578	0.30802
PLGLB1	0.125233	9.56225	36.1818	0.00435217
SSU72	-0.115683	9.64856	10.0965	0.0219219
SLC2A11	-0.0139576	9.56223	0.42405	0.75313
CHCHD5	-0.0316434	9.54866	4.92429	0.390435
PSMB2	-0.115387	9.63205	10.5615	0.0235004
SLU7	-0.0774305	9.58741	6.96524	0.120263
NCSTN	0.142658	9.58886	23.5635	0.0044826
KIDINS220	0.124225	9.96223	17.7416	0.00090871
CHD4	-0.026139	9.67478	0.498544	0.599099
CCNY	0.0324438	10.0478	1.4356	0.345123
TBR1	-0.112663	9.54681	72.3612	0.00160623
SVBP	-0.0802116	9.54304	58.3984	0.0114269
SMIM20	0.0527759	9.58783	3.23246	0.2914
RPLP1	0.00371355	9.82897	0.00974964	0.929954
GTF2IP12	0.0018099	9.58172	0.00422219	0.970647
DENND6B	-0.0849245	9.55792	18.6545	0.0468261
NCL	-0.0721289	9.64442	4.04035	0.155321
WASH2P	0.0458207	9.56331	4.33191	0.304614
MTFR1L	0.0157445	9.57864	0.338504	0.746462
NT5DC1	-0.14405	9.60647	18.6759	0.00462434
COL9A3	-0.200914	9.59565	42.4217	6.45843e-05
PSMA4	-0.0490799	9.59093	2.66106	0.32838
NACA	-0.152872	9.75021	16.8667	0.000770431
C4orf48	-0.212174	9.60889	40.1512	2.89979e-05
TYROBP	-0.00852126	9.53789	2.15452	0.71137
SEC31A	0.0912834	9.78906	6.36266	0.0401702
PLEKHB2	-0.181799	9.61978	28.3219	0.000354057
RPL29	-0.0384313	9.69318	0.992281	0.430976
GALNT18	0.086233	9.57339	10.7594	0.0699662
ANAPC11	-0.100765	9.59216	10.8148	0.0448785
PHACTR3	0.162487	10.3683	93.3764	2.81778e-09
ATP9A	-0.189791	9.86854	32.8206	1.91199e-06
RPS3	-0.0238748	9.69517	0.392435	0.624359
WASH7P	-0.00212413	9.61847	0.0038942	0.96704
GPN2	0.0443794	9.55946	4.95456	0.302455
GUK1	-0.304837	9.66172	67.853	6.41018e-10
LDHA	-0.348306	9.58597	144.062	1.48855e-12
NEDD4L	0.00969886	9.61418	0.076325	0.850313
ACOT7	-0.0391586	9.66352	1.10541	0.435079
CLSTN1	-0.0734261	9.89802	5.37826	0.0602737
ATP1A2	0.067047	9.98408	5.30691	0.0661333
PRKACB	0.0637904	10.1511	8.05287	0.0439883
VPS26B	0.0648127	9.61899	3.63803	0.208855
RGS7	-0.0284297	10.3394	2.32149	0.29821
DDX20	0.12078	9.57707	20.9099	0.0125024
POMP	-0.108177	9.62568	9.56717	0.0341257
MRPL12	-0.0190992	9.54789	1.89198	0.596968
STK25	-0.110589	9.595	13.0874	0.0282986
PPAN	-0.00373135	9.53808	0.390222	0.87293
SYT11	-0.510469	9.86142	251.18	6.4202e-39
MACROD2	-0.051443	10.3297	5.22688	0.0609158
TIMM10B	-0.0343285	9.56535	2.34121	0.45073
CA11	-0.279581	9.57535	114.081	5.34336e-09
COX6C	-0.451196	9.70687	145.834	3.90012e-22
AL445433.1	0.014983	9.53805	6.55618	0.512827
C1orf61	-0.494579	10.127	451.685	1.78842e-58
LGALS8	0.0376168	9.57254	2.22058	0.427785
RAN	-0.135264	9.61382	15.8231	0.0080083
MFN2	-0.116282	9.60497	12.9345	0.0223073
PCDH9	0.0566937	10.9716	37.9957	0.00295168
LINGO1	0.389154	9.94213	130.129	3.51619e-23
CREM	0.059464	9.93072	3.23973	0.120834
KCNJ6	-0.574117	9.64148	257.561	2.23471e-31
EIF4G3	-0.0307951	10.3873	4.46649	0.244411
ARF1	-0.185945	9.66903	25.4915	0.000167661
RPL24	-0.0772001	9.73969	4.10982	0.0952834
HPCA	-0.153483	9.56734	41.7335	0.000892778
CIRBP	-0.589697	9.73393	275.453	1.51649e-39
MYO10	0.0134672	9.96711	0.206382	0.714866
MDH1	-0.352837	9.65805	91.6956	8.47284e-13
HMGB1	0.292065	10.0788	108.759	2.08233e-17
C6orf106	-0.165191	9.63865	21.4665	0.00110221
FO538757.1	-0.0200966	9.55018	1.67287	0.596404
GDI1	0.0274023	9.69468	0.533275	0.575822
SLAIN1	0.275628	10.2469	150.525	5.96245e-20
SLITRK5	0.252201	9.74498	45.1304	1.00735e-07
CDC16	0.0569947	9.66631	2.36331	0.25813
CAMK2B	0.0376129	9.68936	0.946151	0.445292
ASCC1	0.0823662	9.70531	4.54141	0.0905358
NDRG2	0.211486	9.76563	32.1203	4.5776e-06
EAPP	0.118934	9.61334	12.3013	0.0212713
RPL36AL	-0.136263	9.61019	16.389	0.00749919
RAB15	-0.102676	9.56222	23.3309	0.0211164
GPI	-0.0130864	9.81842	0.130117	0.759119
SMARCD3	0.0753342	9.63485	4.42188	0.143347
PCNX1	-0.0195015	10.0158	0.510672	0.579078
CABP1	-0.0774841	9.67917	4.29404	0.116248
FASN	-0.032842	9.57832	1.47594	0.49949
SLC48A1	-0.506987	9.6493	207.99	6.58869e-25
APBA2	0.0688353	9.91844	4.79225	0.0762484
RAB11A	-0.077491	9.62371	5.01778	0.129924
GOLGA8A	0.0235982	10.036	0.758162	0.496267
SRSF8	-0.00221123	9.57818	0.00674573	0.963727
MAP1A	0.146099	9.72829	13.343	0.00221895
PCBP2	-0.0599127	9.69536	2.64972	0.21774
SERF2	-0.000335028	9.64575	8.05672e-05	0.994752
NBR1	0.112984	9.68556	9.10806	0.0231484
SCG3	-0.0882512	9.83319	6.31165	0.034458
SLC8A1-AS1	0.0441806	9.61647	1.54291	0.390981
RTL10	-0.135853	9.56362	38.3156	0.00256378
ARPP19	-0.461158	9.71286	155.658	2.27462e-23
RNF135	0.069121	9.57263	7.48161	0.144987
COX5A	-0.188465	9.59354	37.4805	0.000172665
MBTPS1	0.0197902	9.79878	0.321555	0.650871
TSPAN3	-0.0468466	9.77383	1.69995	0.294378
SH3GL3	0.0536029	9.703	1.70133	0.270705
OCIAD1	0.0750028	9.77326	4.28275	0.0969722
MESP1	-0.139352	9.55112	76.7516	0.000363716
SEC14L1	-0.0530625	9.70309	1.95249	0.271403
SFT2D1	-0.108297	9.62262	9.86344	0.0340243
HCFC1R1	-0.0547368	9.57182	4.68175	0.247409
EIF1AX	-0.0130994	9.66381	0.123537	0.794334
HES6	0.0636886	9.58833	4.55747	0.203523
TCF25	0.304114	9.81898	72.7573	4.67078e-12
YPEL3	0.0910863	9.67103	5.69755	0.0703126
NDUFAF2	0.00868638	9.83136	0.0560475	0.836854
ATP1B2	-0.238903	9.84733	47.869	3.90433e-09
HNRNPL	-0.0858245	9.70282	4.49259	0.0746012
COPRS	-0.275435	9.5839	93.9791	2.09008e-08
UROD	-0.114613	9.55483	40.1712	0.00545947
DHX36	-0.0357466	9.8253	1.0789	0.397896
KRT222	-0.0431316	9.53874	41.6276	0.0865103
PSMD8	-0.162433	9.59994	25.9208	0.00132433
USP39	-0.0135909	9.59868	0.186058	0.789177
IFIT1	0.0314631	9.57623	1.4093	0.514316
ADAM11	-0.0850424	9.5509	29.235	0.0282525
RAB40B	0.0297641	9.62561	0.703661	0.563037
CHCHD10	-0.233258	9.61334	47.9423	4.28808e-06
TBCB	-0.0298097	9.59853	0.857623	0.557277
CTXN1	-0.176564	9.57331	46.4756	0.000209189
MRPL34	0.0552389	9.56509	5.95605	0.222202
AC074033.1	0.00136291	9.53299	149.195	0.510534
U2AF1L4	-0.0174951	9.55169	1.15808	0.653679
NUMBL	0.127562	9.57999	21.7711	0.00910433
ATP1A3	-0.500706	9.60601	242.777	1.14302e-23
SNRPD2	-0.0825029	9.57669	9.28886	0.0877875
MCRS1	-0.0204669	9.55487	1.30574	0.617374
HS6ST3	-0.0824668	10.4694	24.7731	0.000950769
ATP6V1D	-0.14328	9.61803	17.8373	0.00496752
FAM213A	0.0831295	9.73737	4.87765	0.0771535
TFPT	-0.0383712	9.55507	4.48312	0.351079
GHITM	-0.105201	9.6041	10.4745	0.0386913
SMARCB1	0.098866	9.62827	7.95626	0.0555665
DTNB	-0.0485175	9.97507	2.65307	0.182268
FUNDC2	-0.135727	9.58517	22.0125	0.0061208
LINC01278	-0.0633158	9.92161	3.71888	0.0975878
ATP6AP2	-0.225168	9.65873	37.6487	5.93596e-06
GPM6B	0.146383	10.3579	67.0703	1.00849e-07
TMEM141	-0.16037	9.54855	124.67	1.71613e-05
OLFM1	-0.364056	9.7249	97.0738	2.48228e-15
RPL7A	-0.27256	9.7432	53.9813	1.89357e-09
TUSC1	-0.0412081	9.54416	13.1212	0.207456
ZNF7	0.0602532	9.57411	5.49103	0.207286
BAALC	0.174843	9.73066	21.2552	0.000251012
C8orf37	0.0347668	9.546	8.07295	0.3051
C8orf59	0.154605	9.57876	32.4557	0.00148679
RPL7	-0.187958	9.66771	24.202	0.000144669
PSD3	-0.0838334	10.224	17.854	0.00450105
MICU3	-0.129335	9.82398	14.1619	0.00206945
NDUFB2	-0.283499	9.64554	60.8922	1.45746e-08
AKR1B1	-0.0612363	9.56499	7.27317	0.177718
ZC3HC1	-0.0422519	9.59158	1.9462	0.400747
PSIP1	0.142742	9.87376	18.6469	0.000481216
VGF	-0.147045	9.56416	42.5847	0.00115149
PPP1R9A	-0.154927	10.2006	55.4545	2.06031e-07
LIMK1	0.0524418	9.57755	3.86964	0.279539
2022-09-07	0.0280636	10.0647	1.20169	0.407156
RPL21P75	-0.0202559	9.53572	24.9596	0.261701
PHF14	0.0528329	10.1654	5.78468	0.0912173
SASH1	0.0737975	10.1043	8.70203	0.0249482
CDC40	-0.130364	9.72904	12.4313	0.00517048
MAP3K7	0.004582	9.75285	0.0156748	0.92053
FIS1	-0.215863	9.61287	41.6597	2.13339e-05
TBCC	-0.0582899	9.54825	16.8917	0.111894
RUFY1	0.0174491	9.64371	0.231478	0.73264
PJA2	-0.10461	9.87606	10.1032	0.00865482
COX7C	-0.371607	9.68868	97.4664	7.89475e-15
SKAP2	-0.097601	9.56156	20.5234	0.0274858
RPL37	0.0850657	9.71982	4.81942	0.0759822
SPARCL1	0.00987548	10.182	0.181962	0.748062
HOPX	-0.302105	9.59988	90.7664	1.85229e-09
PAICS	0.0065925	9.6271	0.0353898	0.897915
SST	-0.278505	9.5746	107.856	5.53782e-09
ZBTB38	0.195275	9.74471	26.2707	3.4193e-05
C3orf18	-0.0590002	9.54541	23.6642	0.0837353
HMGB1P5	-0.0446028	9.55703	5.43164	0.290474
RBMX	-0.0427476	9.9295	1.94617	0.260633
INPP5J	-0.0292224	9.53836	21.1535	0.229069
UFD1	0.147667	9.58305	27.428	0.00280322
SH3BGR	0.113287	9.57585	18.7475	0.0185331
CSE1L	0.0356533	9.65537	0.931359	0.482398
YWHAB	-0.392763	9.76228	113.965	4.40688e-19
COMMD7	0.0275534	9.5711	1.2341	0.558493
ABHD12	-0.151678	9.75441	17.0595	0.000801394
PAK5	-0.172215	9.78939	22.5308	7.36915e-05
ILKAP	0.0924835	9.69383	6.0906	0.0605242
C2orf80	-0.0809234	9.64165	5.11527	0.111258
FAM171B	-0.218285	9.94271	48.5765	3.37369e-09
DHFR2	-0.0408981	9.54818	8.42506	0.26255
HSP90AA2P	0.0386424	9.53779	49.4146	0.0750086
PPP2R5E	-0.0747808	9.89467	5.32945	0.0564895
CCM2	-0.270898	9.68474	52.107	2.13583e-08
RAB27B	-0.10106	9.75497	6.72434	0.0260417
TRAPPC6B	0.0866763	9.64635	5.78242	0.09068
ERH	-0.0748661	9.61376	4.87785	0.143429
AC016739.1	-0.0153272	9.53563	18.0527	0.385684
RSRC2	0.132637	9.70685	12.4487	0.00655517
ST6GALNAC5	0.359047	9.59642	124.063	2.01936e-12
UNC80	0.0453142	10.0567	2.93744	0.18451
KCNG1	-0.027366	9.53859	17.794	0.267624
KCTD10	-0.00152971	9.55986	0.00569245	0.97187
COX6B1	-0.27565	9.64281	57.4013	3.86618e-08
STMN3	-0.27868	9.61786	67.9828	3.69597e-08
DAAM1	-0.121599	9.77525	10.7718	0.00607516
LINC01821	-0.0361203	9.53517	144.063	0.0300538
TUBA1A	-0.41135	9.74116	121.906	6.24819e-20
RPL13AP20	0.0106519	9.53365	121.616	0.193521
ZFYVE21	-0.0615389	9.59228	4.106	0.221263
CPNE9	0.0144425	9.54053	3.17637	0.597294
MFSD6	-0.150031	9.73686	16.4506	0.00114888
PRKCA	0.0304086	10.5496	5.97826	0.205509
CCNQ	0.0390288	9.56151	3.41531	0.37448
SMAP1	-0.113953	9.88644	12.5327	0.00381934
GABARAPL1	-0.265488	9.60624	68.2535	1.50835e-07
SPRYD7	0.0836375	9.59479	7.33603	0.0991387
CIR1	0.126993	9.70943	11.0625	0.00902445
PGM2L1	-0.325066	9.63383	83.3982	9.86993e-11
MRPS21	-0.221093	9.61469	43.8344	1.33888e-05
CPNE4	-0.127677	9.60916	13.969	0.0122374
PRR13	-0.140803	9.55281	68.2167	0.000454167
OXCT1	-0.210397	9.74329	32.4516	3.93921e-06
CHP1	-0.29972	9.61172	81.6582	3.04297e-09
NAP1L1	-0.122832	9.87971	13.8854	0.00193959
FKBP2	-0.0855691	9.62814	5.7362	0.0939999
CDC123	-0.0425659	9.61796	1.525	0.40652
SELENOH	-0.0985959	9.55363	31.4558	0.0149969
TMCO1	0.0154525	9.67341	0.168201	0.756987
TMED2	-0.0592178	9.59689	3.63841	0.242265
PAK1	-0.438784	9.71703	139.519	1.97498e-21
SLC7A10	-0.0819756	9.55106	26.6589	0.0349264
WAC-AS1	-0.133926	9.58937	20.4244	0.00732914
MRPS36	-0.0257092	9.58497	0.80515	0.604349
SLC1A2	-0.0120487	10.366	0.490302	0.654073
POGZ	0.0777709	9.95921	6.67021	0.037459
RPL15	-0.291503	9.7431	59.2404	1.25188e-10
CAPN1	-0.118011	9.58004	18.111	0.0157171
RGS4	-0.538485	9.58846	347.315	4.40077e-28
NUDCD3	-0.0718485	9.79797	3.96088	0.0979082
JAZF1	-0.0844334	10.0723	10.1464	0.0111547
PHPT1	-0.0896424	9.58455	9.5289	0.0701357
THAP6	-0.131862	9.64253	13.4401	0.00918946
LAMTOR5	-0.187891	9.58725	40.5781	0.000154381
CNPY3	-0.0128786	9.56037	0.395029	0.767847
PVALB	-0.0286155	9.53719	30.516	0.191153
FAS	0.0654265	9.54119	61.9582	0.0169555
INPPL1	0.0124056	9.57782	0.216477	0.798332
AK5	-0.0855609	9.77304	4.98303	0.0548669
CCND2	-0.491672	9.70078	186.171	8.60715e-26
ATP1A1	-0.0926029	9.80046	6.78474	0.0321223
HAX1	-0.101138	9.57544	14.8578	0.0354433
CAMSAP2	0.0660002	10.1655	9.12908	0.0351134
DNAJC5	0.025393	9.65946	0.471213	0.615534
PTGES2	-0.138979	9.57063	31.8597	0.00313544
NDUFAF5	0.0604379	9.61172	3.30118	0.240319
NAXE	-0.035894	9.57143	2.01457	0.447205
SNRPD1	-0.0792519	9.59571	6.56567	0.116786
SH3D19	0.0415189	10.2114	3.93731	0.168767
KDM1A	0.0912124	9.59039	9.41845	0.0699389
MED9	0.0305921	9.57197	1.48902	0.517841
BAP1	-0.0607325	9.58555	4.4369	0.221255
KIF5B	0.220017	9.74761	34.621	2.9737e-06
CAMTA1	-0.0427052	10.336	6.29623	0.118511
FBXO33	0.0616241	9.63523	2.8888	0.230813
ARHGEF2	0.213814	9.63609	34.813	3.77419e-05
SERBP1	0.080355	9.67415	4.65737	0.109086
LAPTM4A	-0.0360133	9.61046	1.14407	0.481963
B4GAT1	-0.0817222	9.61837	5.56098	0.110292
PREX1	-0.0408586	9.83565	1.39568	0.32835
MBOAT2	0.18472	9.89952	30.1108	3.90804e-06
EIF2B3	0.0574124	9.70029	2.31231	0.239546
MARK1	0.14825	9.97657	24.8314	6.2815e-05
TMEM242	0.0106949	9.59171	0.125274	0.831843
GDF10	-0.0498598	9.53783	73.0188	0.0340367
GRIN2B	-0.233216	9.96556	59.129	1.02143e-10
MAPK1	-0.0950971	9.92543	9.3213	0.0122445
SRCIN1	-0.0755466	9.5848	6.70288	0.127299
CUEDC2	-0.0586028	9.59406	3.6063	0.245425
CTSD	-0.0811604	9.64769	4.81882	0.108892
MEAF6	-0.031867	9.6398	0.80475	0.532269
CDC42BPA	0.082213	10.2802	21.0127	0.00432383
RPL13	-0.513692	10.0114	305.397	3.66915e-52
UBE2D4	-0.116681	9.57999	18.0061	0.0169152
EIF5A	-0.0691342	9.62178	3.96082	0.176973
HNRNPU	0.00047999	9.89496	0.000231739	0.990274
KLC1	-0.112786	9.71456	9.32415	0.0174171
PLIN3	-0.000863645	9.55275	0.00270738	0.982603
COQ10B	0.0185671	9.57107	0.563502	0.693384
NUDT14	-0.203599	9.54376	337.854	6.81855e-10
ST8SIA1	0.00711434	9.97809	0.0544014	0.845335
COPS2	0.0836109	9.67863	4.96801	0.0942151
RPL30	0.140647	9.59908	19.5636	0.0059196
TLK1	-0.102607	9.82799	8.40733	0.0143531
GNA15	-0.0113091	9.53518	14.4109	0.48474
FIBP	-0.293268	9.59377	94.8534	4.39152e-09
RNASEH1	-0.0475869	9.5561	6.6418	0.254167
NOP53	0.0126858	9.5652	0.314564	0.779849
B2M	-0.0439157	9.73795	1.24964	0.344965
HERC1	0.00831727	9.97426	0.0836691	0.820269
MAP2	0.205966	10.4733	221.248	1.01042e-15
DERL2	-0.125882	9.59481	17.2661	0.0124732
KCTD13	-0.0529486	9.57442	4.26111	0.268943
UBL7	0.0142716	9.55149	0.789582	0.712122
IRF2BP1	0.0443198	9.54693	11.6648	0.201688
C9orf16	-0.184711	9.59596	35.1483	0.000243092
NARFL	0.0757459	9.56524	11.2952	0.0941272
KEAP1	0.0430081	9.57525	2.72466	0.370662
MYL12B	-0.240524	9.59307	62.2058	1.53362e-06
UBALD1	0.0227097	9.55741	1.39187	0.589954
TBRG1	0.120282	9.59446	15.2621	0.0177506
UQCRC2	0.109129	9.72757	8.64054	0.0219813
PHKB	-0.0613581	9.90571	3.58245	0.114051
SPIRE2	0.0594363	9.61721	3.00111	0.248892
C17orf100	0.0280411	9.53943	15.897	0.266865
HLF	-0.142451	9.65436	14.9837	0.00452479
TEX2	-0.0333465	9.67489	0.800687	0.502164
SCRG1	0.0782373	9.81954	4.47525	0.0688005
NRBP1	0.0477944	9.61451	2.04531	0.353279
OAZ2	-0.0164993	9.62684	0.219761	0.747826
SNAI2	-0.0108462	9.53814	3.25536	0.64553
CYCS	-0.247533	9.60901	55.0169	1.02559e-06
TNRC6C	0.21512	10.1242	82.7657	6.01201e-11
RPL6P27	0.034104	9.54043	17.1448	0.203816
PCYT2	-0.0312714	9.55423	3.13025	0.441696
TFG	0.0295871	9.67397	0.638168	0.553751
ZNF446	-0.0255044	9.54356	5.68265	0.423624
STX1B	-0.410051	9.6212	148.4	3.23855e-16
RPS15	-0.165761	9.74927	18.3018	0.000265536
NDUFA3	-0.201229	9.62186	32.7082	7.51938e-05
ELP6	-0.0654016	9.57604	6.13857	0.174935
GRHPR	0.0577837	9.60972	3.00312	0.261107
PHYHIP	-0.0837725	9.63078	5.52756	0.100861
DHPS	0.0129612	9.56636	0.316775	0.777007
MED29	-0.0018443	9.57278	0.00531241	0.969043
RPS19	-0.0317994	9.7587	0.675593	0.484548
DBP	-0.00822941	9.5468	0.38928	0.814509
RPS9	-0.0774118	9.70144	4.03005	0.108541
PIH1D1	0.0259848	9.57589	0.962903	0.589662
TMEM18	-0.148054	9.55407	70.8567	0.000294637
AKAP12	-0.0783016	9.85442	5.09136	0.0552243
SYNJ2BP	-0.0208207	9.58027	0.562007	0.670649
CFDP1	-0.115719	9.78411	9.79538	0.00840345
LARP1	-0.101614	9.77011	7.81643	0.0228536
PPP1R21	0.0616468	9.72529	2.63163	0.194945
CFAP36	-0.166379	9.66863	20.569	0.000775224
CHCHD6	-0.173526	9.66931	21.6986	0.000448408
MRPL4	0.0274115	9.54873	3.69909	0.452294
PDHA1	-0.0316582	9.60379	0.974885	0.535054
PRPF4	-0.0196545	9.56338	0.814824	0.660989
TMEM246	-0.110683	9.59115	13.4806	0.0272768
CBWD5	0.0616826	9.82442	3.10203	0.148638
TTC39B	-0.125929	9.67355	11.2761	0.0108242
TUBB4B	-0.182911	9.56619	61.7351	6.67442e-05
SMIM19	-0.0391877	9.56937	2.62807	0.40145
IGBP1	0.039983	9.60106	1.55684	0.433562
FBXO25	-0.0494948	9.66044	1.81453	0.324717
ACHE	-0.0422568	9.56857	3.06435	0.36339
COL26A1	-0.0786915	9.55928	14.9643	0.0692696
GTPBP10	-0.0318128	9.63882	0.802922	0.533168
CROT	0.0254821	9.59734	0.655017	0.616064
CACNA2D1	-0.0781874	10.0882	9.29783	0.0173058
DNAJC30	-0.0389111	9.54792	7.93877	0.283489
HDDC2	-0.0909035	9.6346	6.58509	0.0744598
FUT9	0.0406769	9.90378	1.41917	0.300439
COX7A2	-0.385954	9.63954	118.206	1.04188e-14
ENPP4	0.0779153	9.59927	6.20661	0.126741
KLHDC3	0.00981659	9.58664	0.11088	0.843882
OARD1	-0.0289431	9.57039	1.41327	0.537683
PHF20L1	0.198239	9.81868	31.7765	5.26884e-06
TTC1	0.122992	9.78109	11.0609	0.00627795
AC008608.2	-0.0283233	9.53786	23.8818	0.223948
SKP1	-0.187325	9.7492	25.6545	3.65774e-05
MCTP1	0.00212762	9.94176	0.0043281	0.955026
IFT22	-0.0267182	9.54717	3.97937	0.452246
NDUFA5	-0.204178	9.66364	31.0608	3.82489e-05
MSL3	0.0203574	9.56207	0.926974	0.645319
NDUFS6	-0.164599	9.60473	25.3975	0.00118543
FRG1	0.0362014	9.6184	1.10917	0.482039
HSPA4L	0.703954	9.71656	309.275	1.12921e-43
SOBP	0.0341262	9.96827	1.24311	0.355105
AC004057.1	-0.0532704	9.536	153.699	0.00581894
PPA2	0.029528	10.0319	1.15118	0.39656
PLPP6	0.0151392	9.53983	4.15571	0.563225
PPP3CA	0.0309804	10.1769	1.95276	0.316627
TSC22D3	0.173445	9.6916	20.319	0.000483701
UBE2K	-0.0378599	9.99174	1.76791	0.291085
LDB2	-0.00122796	9.76547	0.00096346	0.978308
AC093323.1	-0.107438	9.55228	42.6183	0.0068715
VLDLR	-0.0575904	9.57115	5.44957	0.222062
TAGLN3	-0.2607	9.67321	50.3623	1.00984e-07
CBWD3	0.00833416	9.80099	0.0534111	0.84831
FAM107A	0.264563	9.62423	52.2741	3.83947e-07
CAMKV	-0.256949	9.56634	123.721	2.14154e-08
INIP	0.0818323	9.64554	4.94969	0.11026
GPX1	-0.0193936	9.5708	0.587285	0.680267
RUFY3	0.0587227	9.98763	4.28573	0.106118
FBXL2	-0.205567	9.68814	28.9839	2.1906e-05
USF3	0.068014	9.62059	3.88082	0.18736
RANBP1	-0.0648794	9.57153	6.59151	0.169784
SUMO3	-0.134937	9.57398	27.3011	0.00474292
C21orf33	-0.159553	9.58184	33.0486	0.00114723
CHMP4B	-0.234154	9.60316	53.8327	3.6171e-06
CRNKL1	0.0814239	9.58508	8.10616	0.10136
SNAP25	-0.541372	9.846	243.089	2.14177e-42
MRPS26	-0.0518979	9.58914	3.01858	0.299743
TRIP12	0.032415	9.95543	1.16971	0.38536
RPL10P6	0.000375459	9.53318	0.903211	0.944061
SRPK2	-0.0149093	10.0645	0.315688	0.658343
C4orf3	-0.137503	9.57835	25.9949	0.00464472
ACOT13	0.0735154	9.57997	7.28345	0.132945
EBPL	-0.0639028	9.58611	4.81182	0.198625
APLP1	-0.0159854	9.62519	0.197689	0.755512
BRD3	0.00605601	9.58549	0.0438025	0.903033
KATNAL1	-0.27117	9.64127	55.4383	6.63731e-08
RPS2P5	0.00311512	9.5354	0.998863	0.849847
CRYM	-0.459404	9.55912	531.828	1.93328e-26
AKT1S1	0.105181	9.55807	29.884	0.0124151
ROGDI	-0.098664	9.56303	20.1022	0.0276936
NAB2	0.0901135	9.54264	91.9634	0.00191899
JPT1	-0.127681	9.57318	25.2187	0.00733689
SPRYD3	-0.173761	9.57703	42.477	0.000323214
OBSL1	-0.00111379	9.6076	0.00117509	0.982653
PSMC4	-0.0277844	9.57083	1.24571	0.555024
PTMS	-0.139888	9.66056	14.4047	0.00509008
KCTD6	0.132687	9.60418	16.8217	0.00980198
HPCAL4	-0.228786	9.58767	61.0209	4.01814e-06
LONRF2	-0.0228209	9.69345	0.367682	0.64033
PAK3	-0.210275	9.82968	33.0415	3.89994e-07
NTM	-0.103862	10.7031	102.831	1.62445e-06
GGNBP2	-0.0318769	9.65375	0.75488	0.528535
ARRDC2	0.0272192	9.53818	21.4848	0.233818
LPCAT4	0.055451	9.56423	6.22096	0.217297
PAFAH1B2	-0.293393	9.66449	64.7996	2.55388e-09
PEX11B	-0.0747477	9.56565	10.6997	0.101623
AAMDC	0.0127241	9.58088	0.211993	0.795404
PARK7	-0.112314	9.65779	9.1105	0.025106
IDH3B	-0.113277	9.56445	25.4504	0.0124171
TMEM9	-0.0891417	9.59269	8.48369	0.0763533
PTPN11	-0.166432	9.70856	19.7091	0.000463878
PTPN20	-0.109829	9.55429	38.0672	0.00729964
S100A13	0.0230491	9.56166	1.16217	0.600853
NAPRT	0.0188522	9.53875	8.29104	0.435732
DICER1	0.0475382	9.83167	1.88544	0.261333
PCDH17	0.072962	9.91329	5.1565	0.061627
MAGI2-AS3	0.147991	9.68994	15.2091	0.00289323
DANCR	0.0976974	9.61561	8.05959	0.0584354
RPL26	-0.197363	9.5782	49.3212	4.69638e-05
RAB18	-0.0945031	9.70455	6.53344	0.0490427
RPS26	-0.239813	9.63186	44.5803	2.10337e-06
M6PR	0.0363934	9.56747	2.46293	0.429513
RAB3A	-0.417493	9.56828	301.292	1.605e-19
ODF2L	-0.149699	9.63651	17.2566	0.00316881
FNDC10	-0.0623473	9.54203	42.4262	0.0399117
MALSU1	0.0575963	9.61322	2.96233	0.263341
RPL3P4	-0.0685396	9.54353	35.6672	0.0332788
TM7SF2	-0.179073	9.58421	39.0977	0.000284062
SH2D3C	-0.0289411	9.54134	10.4429	0.319939
B3GNT4	-0.0344435	9.53447	243.818	0.0144742
2022-03-02	-0.0530796	9.55896	6.99641	0.218345
SLC22A17	0.0244223	9.86908	0.517906	0.547607
FJX1	-0.0655271	9.54952	19.4014	0.0821571
CCP110	0.159743	9.61578	21.7173	0.00203428
TMEM74B	0.0226911	9.54071	7.70359	0.408861
CBWD1	0.13292	9.69194	12.1263	0.0072768
CADM3	-0.0675974	9.62419	3.78917	0.186697
TUBB	-0.208368	9.61839	37.1573	4.13305e-05
POLR2L	-0.157448	9.57077	39.2981	0.000823496
NDUFB9	-0.0619581	9.58418	4.48646	0.210538
TMEM258	-0.148	9.58013	27.9305	0.00244307
OTUD6B-AS1	-0.0456286	9.61053	1.88261	0.372777
TMEM54	-0.00809328	9.55292	0.228277	0.838672
SPIN1	-0.0894096	9.98716	9.43212	0.0125939
ANO6	0.0136249	9.86209	0.152757	0.738829
LYRM1	0.0901086	9.57289	12.633	0.057612
SCCPDH	0.0585042	9.63393	2.7406	0.255416
VPS35	-0.235092	9.65276	41.538	2.49109e-06
TTC19	-0.0543344	9.75905	2.23594	0.23121
ECE1	0.0541575	9.57921	3.84277	0.267066
CCDC85B	-0.4004	9.64977	121.843	6.05395e-16
PDCD5	-0.0114406	9.60929	0.119905	0.823357
C1QTNF4	-0.299247	9.57254	139.688	2.59618e-10
SNCG	-0.410871	9.57616	241.54	8.60012e-18
MAST3	-0.425358	9.58149	236.971	1.97718e-18
MED4	-0.0090053	9.63428	0.0643645	0.860449
ACSL1	-0.0589473	9.56731	6.22561	0.201463
HIVEP1	-0.0294689	9.73057	0.599828	0.530053
CEP170B	-0.0787642	9.55786	16.3464	0.0649935
SUMO1	-0.238057	9.63721	44.7097	2.35544e-06
SCN1B	-0.109645	9.55514	36.6292	0.00808754
[truncated: 15,708 more rows]

## Sheet: opc_de_caudate
	logFC	logCPM	F	PValue
[truncated: 16,955 more rows]

## Sheet: cell_region_go_log10_pvalue
	oli_accumbens_up	oli_caudate_up	oli_cingulate_up	opc_accumbens_up	opc_caudate_up	opc_cingulate_up	oli_accumbens_down	oli_caudate_down	oli_cingulate_down	opc_accumbens_down	opc_caudate_down	opc_cingulate_down
[truncated: 1,254 more rows]

[truncated: 3 more sheets: Venn_OL, Venn_OPC, VENN_GO_log10_pvalue]
