# Supplementary material for: Huntington disease oligodendrocyte maturation deficits revealed by single-nucleus RNAseq are rescued by thiamine-biotin supplementation
Source: Nat Commun. 2022 Dec 21;13:7791. doi: 10.1038/s41467-022-35388-x (PMC9772349; doi:10.1038/s41467-022-35388-x)
Supplement: Supplementary file 11 — Supplementary Dataset 9 [file 41467_2022_35388_MOESM11_ESM.xlsx]

## Sheet: Gene_modules
id	module	supermodule	dim_1	dim_2
RETREG1	1	1	9.86736	2.95313
DYSF	1	1	10.1694	3.26668
GAS7	1	1	9.80091	3.18298
TMEM165	1	1	9.88623	2.72626
NT5DC1	1	1	10.5022	2.84955
SH3GL3	1	1	10.1684	2.61853
RAB40B	1	1	9.70284	2.84462
AK5	1	1	10.1792	2.84419
ENOX2	1	1	9.84981	3.65205
NECAB1	1	1	10.0561	3.23222
TTLL7	1	1	10.1729	2.89821
PDE1A	1	1	9.98606	3.78628
KCNMB4	1	1	9.79794	2.99564
EPS15	1	1	9.6243	3.11947
RTCA	1	1	9.67481	4.01705
HBS1L	1	1	9.64214	2.88761
MBP	1	1	10.2795	2.87036
LANCL1	1	1	10.064	3.72138
PLEKHH1	1	1	9.83191	3.41984
SYNDIG1	1	1	9.83009	2.52613
LPGAT1	1	1	9.71273	3.46954
TACC1	1	1	9.91556	2.65518
FAM107B	1	1	10.2762	2.66974
PPM1H	1	1	10.0527	3.23757
PPP1R16B	1	1	9.86263	3.40296
POLR2F	1	1	9.95018	3.19286
FGFR2	1	1	10.1713	3.29269
ENPP2	1	1	10.2491	2.83691
HHIP	1	1	9.51024	3.60611
RAPGEF5	1	1	10.2136	2.73913
ABCA2	1	1	10.2293	2.81407
SLCO1A2	1	1	10.4064	3.08494
MTUS1	1	1	9.60953	2.98302
TMTC4	1	1	10.1743	3.42077
ZDHHC9	1	1	9.79622	3.75432
SEC14L5	1	1	10.2477	3.26928
MOBP	1	1	10.3814	2.9302
AGTPBP1	1	1	9.57762	2.76298
ZNF536	1	1	10.0139	2.90458
CERCAM	1	1	9.93292	3.03304
CARNS1	1	1	10.0797	3.74861
TECPR2	1	1	9.75418	3.65356
OPALIN	1	1	9.71289	3.74846
LSS	1	1	9.79837	2.95798
ABHD17B	1	1	9.83948	3.6726
TXNIP	1	1	10.0532	3.34836
GLDN	1	1	10.1717	3.63682
TMEM144	1	1	10.2288	2.86705
PALM2	1	1	9.43899	3.5547
JAM3	1	1	9.59338	2.90358
RFX3-AS1	1	1	9.72179	3.95921
NKAIN2	1	1	10.0602	2.91356
PDE1C	1	1	10.1346	2.62347
FAHD2CP	1	1	9.85491	3.80857
CD55	1	1	9.82506	3.14711
CNTNAP4	1	1	10.0788	3.14844
PHLDB1	1	1	9.74428	3.69782
KIF6	1	1	10.3201	3.23968
MOB3B	1	1	10.2784	2.77844
MOG	1	1	10.1085	3.61897
TMEM235	1	1	10.0469	3.69765
PSEN1	1	1	9.7537	3.44091
DEPTOR	1	1	10.2456	3.31684
HPN-AS1	1	1	9.75117	3.04915
LDB3	1	1	10.3089	3.54182
IQGAP1	1	1	9.76723	2.89323
CTNNA3	1	1	10.2661	3.03787
LAMA2	1	1	9.58565	3.49101
ENOSF1	1	1	9.80578	3.86061
COL4A5	1	1	9.96702	3.38874
DAAM2	1	1	10.3743	3.05543
LINC01630	1	1	9.62923	3.66008
LINC00320	1	1	10.0894	3.36805
ZNF708	1	1	9.62377	2.9114
LPAR1	1	1	9.81672	2.83912
LINC01359	1	1	9.69397	3.98523
FOLH1	1	1	10.4848	3.1422
LINC01608	1	1	9.88438	3.28153
VRK2	1	1	10.4623	3.09709
ADAMTS18	1	1	10.3048	3.25035
KIF19	1	1	10.0747	3.44821
AC098679.2	1	1	10.44	3.036
SVEP1	1	1	9.67992	3.67881
LURAP1L-AS1	1	1	9.77152	2.85652
SP100	2	2	1.50774	-6.09515
FAM105A	2	2	1.90151	-6.54651
SORL1	2	2	1.49136	-6.12363
LCP2	2	2	1.15669	-5.9176
SLCO2B1	2	2	1.51136	-5.97452
HCK	2	2	1.22198	-5.89893
ARHGAP24	2	2	1.17274	-6.38551
RREB1	2	2	0.916803	-6.55445
RNASET2	2	2	1.09912	-6.34045
LILRB1	2	2	0.982693	-5.9873
CD86	2	2	0.93711	-6.43796
CX3CR1	2	2	1.84648	-6.60452
TNFRSF13C	2	2	1.77922	-6.66249
NCKAP1L	2	2	1.53946	-6.26007
TRPM2	2	2	1.46193	-5.93394
RUBCNL	2	2	0.958274	-6.08943
CSF1R	2	2	1.51617	-5.98366
CSF2RA	2	2	1.48448	-6.78893
BLNK	2	2	1.46276	-5.88737
TNFRSF1B	2	2	0.876607	-6.60098
CD84	2	2	1.396	-5.87781
AL034397.3	2	2	1.3502	-5.80936
APBB1IP	2	2	1.6584	-6.27993
CYTH4	2	2	1.00258	-6.05078
SLC2A5	2	2	1.3665	-6.78535
TMEM156	2	2	1.85398	-6.55252
FMN1	2	2	0.893923	-6.27636
LYN	2	2	1.15673	-6.23731
ITGB2	2	2	1.26066	-6.17823
FAM149A	2	2	1.68593	-6.64654
DENND3	2	2	1.10229	-6.32888
CSF3R	2	2	1.60621	-6.74352
TRIM38	2	2	1.45099	-6.63231
MS4A6A	2	2	0.924959	-6.12403
VSIG4	2	2	1.27538	-5.8794
INPP5D	2	2	1.36296	-6.31398
ITGAX	2	2	1.36424	-6.73222
IRF8	2	2	1.77844	-6.43178
AL031733.2	2	2	1.58734	-6.17227
IL13RA1	2	2	1.62045	-6.40192
FGD2	2	2	1.4134	-5.89724
FYB1	2	2	1.4663	-5.96013
TLR2	2	2	1.13732	-6.35383
PALD1	2	2	1.82284	-6.54798
ADAM28	2	2	1.41449	-6.71854
ALPK1	2	2	1.53719	-6.28981
TBXAS1	2	2	1.51713	-6.04103
CLEC7A	2	2	1.31629	-6.69243
PTPRC	2	2	0.991901	-6.40902
RNF144B	2	2	0.86174	-6.59516
OLR1	2	2	1.42744	-6.77084
RHBDF2	2	2	1.38963	-6.24613
SCIN	2	2	1.55159	-6.19916
ST8SIA4	2	2	0.962027	-6.16308
HCLS1	2	2	1.01307	-6.34904
LILRB4	2	2	1.82491	-6.64264
SH3TC1	2	2	1.29337	-6.70249
RCSD1	2	2	1.42057	-6.15636
DOCK8	2	2	1.41903	-6.20037
PARVG	2	2	0.882864	-6.34874
RGS10	2	2	1.738	-6.41589
KLHL6	2	2	0.883862	-6.60253
CD53	2	2	1.32276	-6.1481
RIN3	2	2	0.999575	-6.22837
RGS1	2	2	1.09806	-6.7318
ATP8B4	2	2	1.48208	-6.35308
SLC11A1	2	2	0.945259	-6.57487
DEF6	2	2	1.74189	-6.51229
SAMSN1	2	2	0.89415	-6.51791
ARHGAP25	2	2	1.78775	-6.5026
LINC02232	2	2	1.77188	-6.4349
IKZF1	2	2	1.40331	-5.87827
SYK	2	2	1.45503	-6.18857
ABCC4	2	2	1.75768	-6.54711
RBM47	2	2	0.912126	-6.3364
ARHGAP15	2	2	1.10717	-6.29646
IQCJ-SCHIP1	3	1	8.5137	2.20845
NRXN3	3	1	8.89039	3.21798
SIK3	3	1	8.67217	2.53071
SLAIN1	3	1	8.58773	2.07057
SRPK2	3	1	8.75395	2.11432
GNAO1	3	1	9.30891	1.85042
SPOCK1	3	1	8.62338	2.38423
GRIN2A	3	1	8.98046	3.20052
ANK2	3	1	8.63994	2.80995
EDIL3	3	1	8.85757	2.23262
MBNL2	3	1	8.85963	2.27361
SGK1	3	1	8.54144	2.14097
PTBP2	3	1	8.92027	2.67638
ANK3	3	1	8.76727	3.09148
PTPRM	3	1	8.92357	1.54595
NUTM2A-AS1	3	1	9.03097	1.84233
OSBPL1A	3	1	8.34641	2.29954
PTK2	3	1	8.74114	2.74541
TRIM2	3	1	8.86354	2.51318
PPP2R2B	3	1	8.84662	3.15017
FCHSD2	3	1	8.46373	2.769
PLXDC2	3	1	8.89826	3.00838
AKAP6	3	1	8.45316	2.6954
FNBP1	3	1	9.45531	3.24475
ZFYVE16	3	1	9.13489	3.2037
ZEB2	3	1	8.99789	2.54153
DLG1	3	1	9.20282	1.9366
EXOC6B	3	1	8.70703	2.54774
PHLPP1	3	1	8.79208	2.16767
RYR2	3	1	8.73413	2.49577
ARHGAP21	3	1	8.7487	1.89495
AUTS2	3	1	8.83523	2.87749
HIPK2	3	1	8.75699	2.29186
TMEFF2	3	1	9.04667	2.77967
FMNL2	3	1	9.02427	1.99181
SSH2	3	1	9.13363	2.6403
PDE4B	3	1	8.52464	2.1484
CDK19	3	1	9.17147	1.92282
PTPRD	3	1	8.65614	2.29467
DIP2B	3	1	9.09874	1.99489
MAGI2	3	1	8.60592	2.23951
DOCK4	3	1	8.46737	2.22648
ANKIB1	3	1	8.40784	2.53416
KLHL32	3	1	8.87054	3.01597
LINC00882	3	1	8.79508	2.91147
DOCK10	3	1	8.58113	2.39008
DLC1	3	1	8.79938	2.88203
MYO6	3	1	9.15615	1.62296
UNC5C	3	1	9.03392	2.93928
NFASC	3	1	9.28559	1.78358
SGK3	3	1	8.93461	1.78182
C9orf3	3	1	8.90781	2.17576
HECW2	3	1	9.07428	3.23559
KCNH8	3	1	9.02962	3.30875
PTPN13	3	1	9.19848	1.47869
TJP1	3	1	8.39039	2.36256
FBXL7	3	1	8.68294	2.1883
ANO4	3	1	8.85416	3.17327
IGSF11	3	1	8.90349	2.26413
NCKAP5	3	1	8.91893	2.0506
CREB5	3	1	9.28711	3.49512
C10orf90	3	1	8.86403	2.06916
IL1RAPL1	3	1	8.56926	2.71234
TCF12	3	1	8.5681	2.20533
MIR181A1HG	3	1	8.79701	2.52294
SRCIN1	4	1	10.6581	2.56573
CCP110	4	1	10.0799	1.82096
LIMCH1	4	1	10.0999	2.05375
SLC24A2	4	1	9.89813	2.1961
GNAI1	4	1	10.3683	2.0817
PXK	4	1	10.1322	1.83219
SHTN1	4	1	9.96247	2.1103
GRM3	4	1	10.0728	2.35998
NCOA7	4	1	10.06	2.18168
ADAMTSL3	4	1	10.648	1.9706
BIN1	4	1	10.4719	1.84146
ANKRD18A	4	1	10.9854	2.58896
RASGRF1	4	1	11.0279	2.64372
PIEZO2	4	1	10.7425	2.23496
ATP8A1	4	1	9.94678	2.43555
SEMA4D	4	1	10.5539	2.5586
ARHGAP23	4	1	10.1257	2.43767
ZDHHC11B	4	1	9.97084	2.20629
RASGRF2	4	1	10.9736	2.66522
MAP7	4	1	10.1035	2.31133
RNF220	4	1	10.1274	2.17745
COL18A1	4	1	10.9557	2.64379
YPEL2	4	1	10.2259	2.07766
TF	4	1	10.4379	2.74686
CNTN2	4	1	10.5806	1.9464
ZNF652	4	1	10.4666	1.90708
ELL2	4	1	9.73592	2.6071
SH3TC2	4	1	10.8215	2.62934
SLC5A11	4	1	11.0408	2.63316
CDK18	4	1	10.5525	2.18142
TMEM63A	4	1	10.5934	2.62676
ZDHHC20	4	1	10.412	2.1726
TMEM98	4	1	10.5294	2.2631
SORCS2	4	1	10.1996	2.49317
CD22	4	1	10.6188	2.09982
FRMD4B	4	1	10.1014	2.37524
SLC25A13	4	1	10.6442	2.71259
DPYSL5	4	1	10.8287	2.75452
MVB12B	4	1	9.85308	2.45569
SYNJ2	4	1	10.5483	2.43152
PLCL1	4	1	9.99911	2.29324
SLC39A11	4	1	10.215	2.26314
CPOX	4	1	10.3572	2.04129
MYO1D	4	1	10.5404	2.47652
ATG4C	4	1	10.0834	1.84986
LRP2	4	1	10.8398	2.35505
PCSK6	4	1	10.3919	2.36504
MYO1E	4	1	10.6076	2.73163
NMUR2	4	1	10.5242	2.03423
ABCA8	4	1	10.2758	2.16333
ST18	4	1	10.132	2.46014
CLMN	4	1	10.0316	2.21928
LINC01105	4	1	10.1619	1.76447
MAN2A1	4	1	9.95191	2.21216
LRRC1	4	1	10.6743	2.1354
FAM124A	4	1	10.7722	2.66851
AC106869.1	4	1	10.8234	2.21037
ABCA6	4	1	10.8194	2.32464
DPYD	4	1	9.90841	2.4421
TTYH2	4	1	10.6948	2.19699
ITGA2	4	1	10.7265	2.71914
LRRC63	4	1	10.9615	2.60867
CDH4	5	3	-6.69658	-0.34647
HS6ST2	5	3	-6.98278	-0.39653
C1orf61	5	3	-7.32594	-0.98698
AKAP12	5	3	-7.23759	-0.49721
PAM	5	3	-7.21379	-0.38067
GLT1D1	5	3	-7.00906	-0.41389
SHC3	5	3	-6.76971	-0.76979
PTGFRN	5	3	-6.96031	-0.51045
GOLM1	5	3	-6.87696	-0.30252
LRFN2	5	3	-6.70931	-0.15667
TACC2	5	3	-6.62218	-0.95891
XKR4	5	3	-6.52685	-0.23342
COL20A1	5	3	-7.04309	-0.59198
LRRN2	5	3	-6.80365	-0.37599
SORCS3	5	3	-6.66694	-0.95289
SHISA9	5	3	-7.03171	-0.72111
HECW1	5	3	-6.73226	-0.76044
GLRB	5	3	-7.42923	-0.4607
SLC9A7	5	3	-6.98985	-0.41365
SEZ6L	5	3	-6.74928	-0.95121
KCNIP1	5	3	-6.62094	-0.7267
CIT	5	3	-7.42803	-0.34832
NETO2	5	3	-6.9226	-0.52701
PLXNA2	5	3	-6.8221	-0.18833
PPP1R14C	5	3	-7.20845	-0.78941
GAD1	5	3	-6.97372	-0.36497
SUSD4	5	3	-6.59858	-0.21032
PRKAA2	5	3	-6.86413	-0.45192
MYO16	5	3	-6.89333	-0.90824
ICA1	5	3	-6.86144	-0.15363
NEXMIF	5	3	-6.92158	-0.14017
ABHD2	5	3	-6.59305	-0.60892
ANO5	5	3	-6.99655	-0.28106
OLFM2	5	3	-6.92678	-1.05705
C3orf70	5	3	-6.9951	-1.01844
KCNIP4-IT1	5	3	-6.65145	-0.43076
GPR176	5	3	-7.03405	-0.56922
TSPOAP1	5	3	-6.79749	-0.57838
CNTNAP5	5	3	-6.58649	-0.92511
TMEM132D	5	3	-6.62742	-0.93501
SCN3A	5	3	-7.62741	-0.61323
IL1RAP	5	3	-7.14459	-0.71554
MMD2	5	3	-6.546	-0.25537
B4GALT6	5	3	-7.04452	-0.30341
DCX	5	3	-6.83494	-0.67242
SUSD1	5	3	-7.04459	-0.6355
USP43	5	3	-7.07967	-0.69714
TVP23A	5	3	-7.03633	-0.48215
ASIC2	5	3	-6.73335	-0.12265
TRPC3	5	3	-7.15439	-0.73938
CHST8	5	3	-6.60721	-0.90453
SHISA6	5	3	-6.68098	-0.13517
KIF26B	5	3	-6.54772	-0.74952
ALK	5	3	-6.61926	-0.81746
MAP3K1	5	3	-7.0472	-0.75796
SLC24A3	5	3	-6.60791	-0.79328
FHOD3	5	3	-6.5389	-0.23539
SPRY4-AS1	5	3	-6.6915	-0.9302
SPRY4	5	3	-7.31542	-0.95427
GPC6	5	3	-6.67553	-0.09093
DIRC3	5	3	-6.58971	-0.42967
SEL1L3	6	3	-6.56913	-2.80772
ATP1A2	6	3	-6.45886	-2.29846
ATP1B2	6	3	-6.71045	-2.2193
ZMAT3	6	3	-6.27653	-2.1341
PRRX1	6	3	-6.79051	-2.73365
ATP2B4	6	3	-5.95363	-2.10345
SLC1A1	6	3	-5.92064	-2.36746
RIN2	6	3	-5.37339	-2.08151
SAMHD1	6	3	-5.55918	-2.36353
MED12L	6	3	-6.29472	-1.81783
RBMS3	6	3	-5.67959	-2.55485
C2orf27A	6	3	-5.93307	-2.10194
HRASLS	6	3	-6.12075	-2.80292
RHBDL3	6	3	-5.82182	-2.29381
KIAA1549	6	3	-6.70772	-2.89312
DOK5	6	3	-6.35009	-2.48543
ARHGEF26-AS1	6	3	-6.29342	-2.37542
CA8	6	3	-6.44753	-2.54864
BMP7	6	3	-6.51056	-1.98147
DPYSL3	6	3	-6.66787	-1.98069
NT5E	6	3	-6.94382	-2.81915
APCDD1	6	3	-5.93499	-2.53546
PKNOX2	6	3	-6.76389	-1.96801
NPAS2	6	3	-6.69659	-1.85959
PSD2	6	3	-6.53026	-2.66792
ALDH1L1	6	3	-6.55667	-1.95733
TPCN2	6	3	-5.78614	-2.09573
PLSCR4	6	3	-6.55113	-2.08871
TOX	6	3	-6.09422	-2.0353
ZNF423	6	3	-6.43151	-1.88489
AFAP1L2	6	3	-6.60086	-2.88931
ARHGEF26	6	3	-6.22536	-2.56336
FERMT1	6	3	-6.20204	-2.03809
PALLD	6	3	-6.68571	-2.76186
ECHDC2	6	3	-6.27781	-2.49474
GNG12	6	3	-6.73614	-1.95178
RAVER2	6	3	-6.48745	-2.57008
ZNF804A	6	3	-6.81882	-2.7939
CACHD1	6	3	-6.47169	-2.10413
AC099792.1	6	3	-6.65773	-2.39014
STK33	6	3	-6.32375	-1.87849
STK32A	6	3	-6.15352	-2.38495
ADCY8	6	3	-6.61938	-1.92359
CMYA5	6	3	-6.45623	-1.91691
CABLES1	6	3	-6.37556	-2.20987
CRISPLD1	6	3	-6.79773	-2.81725
COL11A1	6	3	-5.85902	-1.94922
AC090568.2	6	3	-6.2399	-1.9596
ZNF516	6	3	-5.59364	-2.48491
LINC01748	6	3	-6.67423	-2.44416
EYA2	6	3	-6.73047	-2.27446
LINC01410	6	3	-6.85708	-2.5486
VCAN	6	3	-6.01314	-2.17261
EGFEM1P	6	3	-6.34158	-2.01796
ARHGAP31	6	3	-5.62338	-2.09449
UST	6	3	-5.84543	-2.02428
ADRA1A	6	3	-6.52283	-2.12584
COL9A1	6	3	-6.40632	-2.6971
ADAMTS9-AS2	6	3	-6.63085	-1.90273
TLL1	6	3	-6.76361	-2.62893
GRIA3	7	3	-5.20726	-0.40704
GOLGA8A	7	3	-5.80637	-0.30785
MARK1	7	3	-5.54336	-0.46887
EPN2	7	3	-4.63866	-0.04015
KCNAB1	7	3	-4.40399	0.044933
FARP1	7	3	-5.49616	0.135971
PTN	7	3	-4.48302	-0.05104
ME1	7	3	-5.49979	-0.53441
GALNT13	7	3	-5.27588	-0.48992
KHDRBS3	7	3	-5.36295	-1.03872
VPS13A	7	3	-5.48528	-0.20593
SLC6A1	7	3	-4.57072	-0.0739
SLC38A1	7	3	-4.83013	-0.63042
CDH13	7	3	-5.82702	-0.38449
ZMIZ1	7	3	-4.93541	-0.75822
ZNF462	7	3	-5.16073	-0.4328
OSBPL6	7	3	-5.45263	0.219177
ETV5	7	3	-4.80822	-0.75075
ARPP21	7	3	-4.37377	0.414214
SPRED2	7	3	-4.9401	-0.70336
ABI1	7	3	-4.97839	0.123627
SPRED1	7	3	-4.93439	-0.67649
ZDHHC14	7	3	-5.23332	0.175935
ST3GAL6	7	3	-4.71497	-0.61992
SNAP91	7	3	-5.47884	-0.47364
KLHL7	7	3	-5.24113	-0.48642
PLPPR1	7	3	-4.41779	0.02293
ACTN2	7	3	-4.51521	0.134439
GNPTAB	7	3	-5.51431	-0.75074
KAT2B	7	3	-4.47238	0.02565
DPY19L3	7	3	-5.42031	-0.7936
SGCD	7	3	-5.26108	0.201629
RIC3	7	3	-4.86934	-0.18758
LDLRAD3	7	3	-4.84214	-0.70314
BRINP2	7	3	-5.82579	-0.62163
CASK	7	3	-5.45573	-0.91914
PPM1E	7	3	-5.64545	-0.47981
TRAK1	7	3	-5.20492	0.352808
MTSS1	7	3	-4.67213	-0.10963
SLC35F3	7	3	-5.50329	-0.27421
ICA1L	7	3	-5.06056	-0.18006
GRIK4	7	3	-5.13088	-0.8637
SYT14	7	3	-5.30833	-0.23288
MAGI3	7	3	-5.75763	-0.80951
CTDSPL	7	3	-5.65175	-0.41446
MCF2L2	7	3	-5.65307	-0.4787
RNF180	7	3	-5.65395	-0.58006
RANBP17	7	3	-4.88667	-0.01903
USP24	7	3	-5.04099	-0.28965
PRTG	7	3	-5.7769	-0.76538
SPATA6	7	3	-4.46902	-0.01499
MAMLD1	7	3	-5.709	-0.61863
LMCD1-AS1	7	3	-4.31042	0.071521
PLEKHH2	7	3	-5.15559	-0.69681
AC012593.1	7	3	-4.36355	0.045165
WDR11-AS1	7	3	-5.83712	-0.60016
NAALADL2	7	3	-4.12668	0.147351
HYDIN2	7	3	-4.78177	-0.07169
PTGDS	8	1	10.9655	0.033867
SOD1	8	1	9.0987	-0.76215
TPT1	8	1	9.67299	-0.56865
CLDND1	8	1	10.728	0.677224
UBC	8	1	9.85462	-0.38364
PEBP1	8	1	10.3429	0.103588
RPS27	8	1	9.73771	-0.54852
PPA1	8	1	10.6566	0.671177
CALM1	8	1	9.90016	0.05999
RPS17	8	1	10.9397	-0.50168
EIF1	8	1	9.73476	-0.48728
STMN1	8	1	10.4093	0.135322
CALM2	8	1	10.233	0.039955
BCYRN1	8	1	10.9419	-0.50101
DPYSL2	8	1	10.2672	0.589278
FTH1P10	8	1	10.9316	-0.22371
PTMA	8	1	10.3265	0.174654
RPL13AP25	8	1	10.9398	-0.46676
CRYAB	8	1	9.17961	-0.73003
RPL10	8	1	9.86075	-0.43797
FTL	8	1	9.82321	-0.43239
ATP1B1	8	1	10.481	0.436519
2022-09-04	8	1	10.97	0.327467
RPLP1	8	1	9.7745	-0.49906
SLC48A1	8	1	10.8788	0.251312
TUBA1A	8	1	10.5609	0.147378
B2M	8	1	9.92037	-0.37977
APLP1	8	1	10.7193	0.855943
RPS28	8	1	9.78717	-0.49189
FEZ1	8	1	10.5869	0.476808
STMN4	8	1	10.9448	0.308554
RGCC	8	1	10.7829	0.371997
MARCKSL1	8	1	10.9396	0.193302
CLDN11	8	1	10.9501	0.326845
MAL	8	1	11.1094	0.711899
CBR1	8	1	10.7517	0.270295
MID1IP1	8	1	10.6107	0.691369
H3F3B	8	1	10.0712	-0.24558
APOD	8	1	9.83719	-0.48239
SCD	8	1	10.9692	0.45465
COL6A3	8	1	10.9362	-0.49748
CSRP1	8	1	10.7899	0.476088
RNASE1	8	1	10.936	0.146991
PPP1R14A	8	1	10.9509	0.220173
CNP	8	1	10.9005	0.32667
PLP1	8	1	10.7311	0.712265
NKX6-2	8	1	10.8455	0.362988
MAG	8	1	10.9776	0.393076
LINC00844	8	1	10.8335	0.299525
SPP1	8	1	10.5693	0.79632
CD9	8	1	10.6555	0.115223
HSPA2	8	1	10.8278	0.388089
CA2	8	1	10.5235	0.82724
ITM2A	8	1	10.9045	0.11456
GPR37	8	1	10.6128	0.721455
ERMN	8	1	10.6431	0.648891
EVI2A	8	1	10.8034	0.356306
MEG3	9	3	-4.73444	2.06307
KCND2	9	3	-4.88345	1.41503
GPM6A	9	3	-4.43489	1.89075
RGS7	9	3	-4.62887	1.91141
SLC1A2	9	3	-4.47152	1.96951
MAP2	9	3	-4.60604	1.72075
CNTN1	9	3	-4.61731	1.33136
KCNMA1	9	3	-4.35694	1.91682
PLCB1	9	3	-4.53837	1.80214
RALYL	9	3	-4.59136	1.63669
NTRK3	9	3	-4.84932	1.69132
RBFOX1	9	3	-4.39748	1.81429
SLC8A1	9	3	-4.20887	1.91996
DPP6	9	3	-4.31062	1.19943
NTRK2	9	3	-4.43751	2.01839
FLRT2	9	3	-4.79451	1.75221
NRXN1	9	3	-4.5426	1.39113
CACNA1C	9	3	-5.04139	2.00861
NEBL	9	3	-4.37597	2.10147
DLGAP1	9	3	-4.58218	1.79976
FGF14	9	3	-4.66638	1.52892
TMEM178B	9	3	-4.98848	1.89196
CTNNA2	9	3	-4.47043	1.9262
KAZN	9	3	-4.59189	1.60681
NRCAM	9	3	-4.74187	1.5981
RIMS2	9	3	-4.90011	1.87374
LRRC4C	9	3	-4.40553	1.20185
TRIO	9	3	-4.45685	1.77192
STXBP5L	9	3	-4.8373	2.01472
LRRTM4	9	3	-4.47018	1.24289
ATRNL1	9	3	-4.77504	1.45973
CACNA2D3	9	3	-4.81367	2.09623
FAM155A	9	3	-4.5902	1.59734
OPCML	9	3	-4.77402	1.35635
KCNIP4	9	3	-4.55552	1.39545
DGKB	9	3	-5.08632	2.01012
RORA	9	3	-4.63385	1.65705
DPP10	9	3	-4.43056	1.86449
SNTG1	9	3	-4.85614	1.4764
PITPNC1	9	3	-4.52914	1.91612
SOX5	9	3	-4.73751	1.59851
GRIK2	9	3	-4.77154	1.28687
CCSER1	9	3	-4.81277	2.0517
FRY	9	3	-4.45023	1.08489
MAP3K5	9	3	-4.08876	1.85652
CSMD1	9	3	-4.59829	1.4038
MDGA2	9	3	-4.58839	1.23342
NRG3	9	3	-4.48429	1.93155
AC092691.1	9	3	-4.51404	1.69867
PDZD2	9	3	-4.79339	1.24125
PARD3	9	3	-4.79512	1.65501
CLU	10	1	8.32696	-0.08104
HSP90AB1	10	1	8.50594	-0.8413
MATR3	10	1	8.00893	-0.34071
DNAJB6	10	1	8.24368	-0.76755
HSP90AA1	10	1	8.24276	-0.65911
DDX5	10	1	7.98602	-0.16416
RPL10P9	10	1	8.52326	-1.00741
HIBCH	10	1	8.12385	-0.70708
CACYBP	10	1	8.49057	-0.94575
HSPE1	10	1	8.69526	-0.89749
ST13	10	1	8.38201	-0.87719
CHORDC1	10	1	8.29022	-0.83677
HNRNPU	10	1	8.0452	-0.4799
HSPA4L	10	1	8.28511	-1.05594
HP1BP3	10	1	8.04739	-0.3361
MAPT	10	1	8.02892	0.292715
CHI3L1	10	1	8.37385	-0.77686
HSPB1	10	1	8.26525	-1.03674
PTGES3	10	1	8.19397	-0.7784
AHSA1	10	1	8.42899	-0.94673
FP236383.2	10	1	7.9929	0.243505
HNRNPA2B1	10	1	8.04962	-0.41299
DNAJB1	10	1	8.30212	-0.98187
MTATP6P1	10	1	8.16403	-0.01276
STIP1	10	1	8.21454	-0.84235
DNAJB4	10	1	8.36808	-0.90232
PAPOLA	10	1	8.07696	-0.49498
HSPH1	10	1	8.27809	-0.88254
DNAJA1	10	1	8.51033	-0.88292
HSPD1	10	1	8.3759	-0.95123
HSPA1A	10	1	8.40047	-0.90499
GFAP	10	1	8.4012	-0.24806
TLE4	10	1	8.13265	-0.58119
PNISR	10	1	7.95614	0.081024
FP671120.4	10	1	7.99838	0.221014
FP671120.3	10	1	8.01969	0.190206
RN7SKP203	10	1	8.07342	-0.19298
XPO1	10	1	8.08946	-0.56234
RN7SKP71	10	1	8.16069	-0.41326
FKBP4	10	1	8.46328	-0.94659
CDKL1	10	1	8.05426	0.063208
FXR1	10	1	8.0954	-0.60328
HSPA1B	10	1	8.3438	-0.93543
FP236383.3	10	1	8.01911	0.168438
BAG3	10	1	8.31178	-0.98754
FP671120.1	10	1	7.96967	0.270226
HSPA6	10	1	8.31385	-0.99695
IGF2R	10	1	8.02459	0.189488
GIPC2	10	1	8.21032	-0.79905
HFM1	10	1	7.95528	0.212797
CA10	11	3	-6.02859	-1.49982
ST8SIA1	11	3	-6.33556	-1.68376
SLC35F1	11	3	-6.2278	-0.50012
ARHGAP10	11	3	-6.24009	-1.21392
DZIP1	11	3	-6.0048	-1.12653
SLC8A3	11	3	-6.12698	-0.48153
NR2F1-AS1	11	3	-6.11259	-1.36201
NRXN2	11	3	-6.1999	-0.43388
DCC	11	3	-6.03118	-1.09138
LHFPL6	11	3	-6.07353	-1.28577
TMEM132C	11	3	-6.37713	-1.41735
MTSS1L	11	3	-6.32968	-1.1227
ABCC8	11	3	-6.29194	-1.29353
NOL4	11	3	-5.95673	-0.95013
MPPED2	11	3	-6.26942	-0.55743
GOLGA8B	11	3	-6.00897	-0.26416
GUCY1A2	11	3	-6.00462	-1.17309
PLCE1	11	3	-5.87632	-1.03507
CACNA1D	11	3	-5.91953	-0.674
TENM1	11	3	-6.01236	-0.87268
NKAIN3	11	3	-6.28382	-1.58121
DGKG	11	3	-6.0753	-1.50414
HIF3A	11	3	-6.28624	-1.29705
DLGAP4	11	3	-6.18315	-0.88744
CNTN3	11	3	-6.43258	-1.48291
RUNX1T1	11	3	-5.98185	-1.25426
XYLT1	11	3	-6.11621	-0.74323
BCR	11	3	-6.15386	-0.83015
ARHGAP20	11	3	-6.26885	-0.62362
FGFR1	11	3	-6.34216	-1.57104
PDZRN4	11	3	-6.3944	-1.18629
KIAA1217	11	3	-6.38526	-1.31829
BRINP3	11	3	-6.21281	-1.64751
NXPH1	11	3	-6.43932	-0.98239
PRICKLE2	11	3	-6.04899	-1.23357
SOX9-AS1	11	3	-5.90166	-0.79702
DENND1B	11	3	-6.27592	-0.54012
GRAMD1C	11	3	-6.3699	-1.46993
PLCB4	11	3	-6.38397	-1.52882
SOX13	11	3	-6.44008	-1.44339
CRISPLD2	11	3	-6.23733	-1.32694
ITGA8	11	3	-6.47103	-1.27898
ATP13A4	11	3	-6.27952	-1.1026
SLC44A5	11	3	-6.35546	-0.80802
ZFPM2	11	3	-5.94141	-1.05542
PAPPA	11	3	-6.19891	-0.50546
ADAMTS17	11	3	-6.09519	-0.89535
ARHGAP42	11	3	-6.22779	-1.13233
RTN4	12	1	9.6952	1.64385
NEDD4L	12	1	9.41965	2.06224
2022-09-07	12	1	9.56947	2.53962
PREX1	12	1	9.6987	2.02986
DNAJC6	12	1	9.43861	1.66719
SORT1	12	1	9.55258	1.82904
GAB1	12	1	9.11589	2.15217
GSN	12	1	9.6578	1.48255
TSPAN5	12	1	9.81985	2.1476
ELMO1	12	1	9.79377	1.91725
NEAT1	12	1	9.67335	1.9065
PRUNE2	12	1	9.58083	1.83531
ARAP2	12	1	9.58221	2.0488
MAP4K4	12	1	9.4438	2.20565
PICALM	12	1	9.64226	1.35611
FUT8	12	1	9.20826	2.41266
PEX5L	12	1	9.85667	1.56291
ST6GALNAC3	12	1	9.79618	2.34371
MICAL3	12	1	9.46163	2.39092
PIP4K2A	12	1	9.56677	2.28693
SPOCK3	12	1	9.80253	2.11985
CNTNAP2	12	1	9.66796	1.95848
EPB41L2	12	1	9.43857	2.28054
CPQ	12	1	9.82464	1.89725
PTPRK	12	1	9.44375	2.22904
RGL1	12	1	9.23597	2.2056
ENOX1	12	1	9.64203	1.85321
TMTC2	12	1	9.72495	1.60336
SFMBT2	12	1	9.33329	2.13952
OTUD7A	12	1	9.57152	2.32259
SLCO3A1	12	1	9.76944	1.57646
RYBP	12	1	9.67271	1.55198
NEO1	12	1	9.6547	1.99813
CDK17	12	1	9.38539	2.42061
UGT8	12	1	10.039	1.51834
DOCK5	12	1	9.80863	1.66962
PLD1	12	1	9.82357	1.36993
MYRF	12	1	9.91992	1.34421
KIRREL3	12	1	9.82344	2.18943
FRYL	12	1	9.86551	1.76807
ERBIN	12	1	9.60174	1.45654
SLC44A1	12	1	9.8331	1.69313
PDE8A	12	1	9.7701	1.71939
ITPKB	12	1	9.65619	1.26052
FRMD5	12	1	9.40221	1.66227
KDM6A	12	1	9.28314	2.57
KIF13B	12	1	9.81724	1.38235
CDH19	12	1	9.55489	1.32111
SGIP1	13	3	-2.53394	1.11396
TTC3	13	3	-2.34201	1.45794
EIF4G3	13	3	-2.38884	0.901051
PSD3	13	3	-2.67308	0.724904
CAMTA1	13	3	-2.37995	1.3668
CLASP1	13	3	-2.2424	1.47111
MYO5A	13	3	-2.74549	1.05516
BTBD9	13	3	-2.69014	1.30659
PPFIA2	13	3	-2.77525	0.671069
CHD9	13	3	-2.59976	1.2792
ANKS1B	13	3	-2.29447	1.06654
NEGR1	13	3	-3.09646	1.15044
MACF1	13	3	-2.23136	1.2643
NBEA	13	3	-2.65204	1.33584
CTNND2	13	3	-2.90838	0.74878
CADM2	13	3	-2.07066	1.07779
FTX	13	3	-2.49805	0.850888
ADGRB3	13	3	-2.47901	1.10887
IGF1R	13	3	-2.16239	1.25972
PBX1	13	3	-2.64562	0.707832
SIPA1L1	13	3	-2.6761	0.725251
FHIT	13	3	-2.58146	0.912067
ZSWIM6	13	3	-2.25142	1.10711
MIR99AHG	13	3	-2.49659	1.06476
AGAP1	13	3	-2.06206	1.0413
NCOA1	13	3	-2.40407	1.39236
APBB2	13	3	-2.2687	0.961408
TNIK	13	3	-2.27732	1.21348
TNRC6A	13	3	-2.45778	1.24134
PEAK1	13	3	-2.33837	1.15809
CDH20	13	3	-2.0981	1.12776
SNHG14	13	3	-2.60243	1.33635
NLGN1	13	3	-3.18282	0.712808
DOCK3	13	3	-2.6419	0.888747
MKLN1	13	3	-2.24916	1.3769
MAGI1	13	3	-2.55667	0.764324
LRRC7	13	3	-2.49547	1.01876
ERBB4	13	3	-2.9237	0.851348
AKT3	13	3	-2.36997	1.19844
SGMS1	13	3	-2.1885	1.12987
MBD5	13	3	-2.66339	1.12203
NPAS3	13	3	-2.13177	1.11042
PRKN	13	3	-2.57157	0.757648
ADARB2	13	3	-2.9609	0.902943
DSCAML1	13	3	-2.19972	1.05674
SERPINE2	14	3	-7.42883	-2.65743
MGLL	14	3	-7.16271	-2.96092
NT5DC3	14	3	-7.52438	-2.41526
ILDR2	14	3	-7.1287	-2.4783
TMEM196	14	3	-7.15096	-2.28643
CDH10	14	3	-7.18225	-2.60417
ETV1	14	3	-7.49485	-2.57874
PLPPR5	14	3	-7.20167	-2.81735
RAMP1	14	3	-7.25287	-2.60664
RXRA	14	3	-7.08076	-2.87415
EGFR	14	3	-7.14976	-2.96514
WFDC1	14	3	-7.24678	-2.94642
KCNQ2	14	3	-7.22984	-2.93541
ADGRA1	14	3	-7.37823	-2.28078
BCHE	14	3	-7.07187	-2.54073
SCN9A	14	3	-7.51764	-2.38577
SATB1-AS1	14	3	-6.99158	-2.24869
HS3ST1	14	3	-7.2149	-3.03098
TSHZ1	14	3	-7.03173	-2.6988
POU6F2	14	3	-7.0233	-2.54641
KCNT2	14	3	-7.02783	-2.52775
ST6GAL2	14	3	-6.88027	-2.29598
LINC01550	14	3	-7.00964	-2.23662
TSHZ3	14	3	-7.015	-2.27701
UPP2	14	3	-7.01798	-2.40978
ATP2C2	14	3	-7.11564	-2.37729
B3GAT2	14	3	-7.27214	-3.0045
MEG8	14	3	-7.21831	-2.72719
ZEB1-AS1	14	3	-7.10308	-2.69522
CHST9	14	3	-7.46978	-2.81892
PLPP4	14	3	-7.16307	-2.6147
ASIC4	14	3	-7.40748	-2.21226
WSCD1	14	3	-7.24753	-2.62901
BEND7	14	3	-6.94436	-2.13147
SALL3	14	3	-7.05712	-2.66581
PYGO1	14	3	-7.24622	-2.59209
CTXND1	14	3	-7.23106	-2.9575
GPNMB	14	3	-7.20937	-2.45651
VIPR2	14	3	-7.04965	-2.16703
AL110292.1	14	3	-7.22956	-2.96531
LINC01322	14	3	-7.07172	-2.24525
AC005906.2	14	3	-7.13266	-2.20096
PRKG2	14	3	-7.14714	-2.38031
AC114316.2	14	3	-7.0618	-2.70839
TTC6	14	3	-6.9603	-2.34839
LPP	15	3	-3.75653	1.40725
LSAMP	15	3	-3.55157	0.760391
PPP1R12A	15	3	-3.65145	1.40078
MACROD2	15	3	-4.07969	1.50658
PRKCA	15	3	-3.85355	1.43194
NTM	15	3	-3.65223	0.850832
BABAM2	15	3	-4.00484	0.636004
NAV3	15	3	-3.75653	1.02956
ASPH	15	3	-3.69816	1.38324
PTPN4	15	3	-4.09184	0.830947
TLN2	15	3	-3.87011	1.16065
NOVA1	15	3	-3.9705	0.708147
ASAP1	15	3	-3.73705	1.51987
UNC79	15	3	-4.35544	0.93022
MSRA	15	3	-4.00595	1.44979
CSRNP3	15	3	-4.04504	0.644361
MAST4	15	3	-4.15337	1.02855
TANC2	15	3	-3.90105	1.18372
SRGAP3	15	3	-4.10307	0.987628
ARNT2	15	3	-4.22535	1.11515
GRIA4	15	3	-3.50602	0.84352
ZDHHC21	15	3	-4.15418	0.497129
GRIA2	15	3	-3.72979	0.936142
ESRRG	15	3	-3.51961	0.866655
ASTN2	15	3	-4.25794	0.819941
TRIM9	15	3	-3.70272	1.56173
RBFOX2	15	3	-3.53862	1.63456
ADGRL3	15	3	-3.51406	0.771422
AL589740.1	15	3	-3.95584	0.566369
NR3C2	15	3	-3.96982	0.844558
PDE4D	15	3	-3.72354	1.12995
DGKI	15	3	-4.13961	0.840577
NAV2	15	3	-3.46172	1.57357
DMD	15	3	-3.45973	0.661848
BMPR2	15	3	-3.79845	1.60312
REV3L	15	3	-4.02537	1.25722
LRP1B	15	3	-3.38023	0.89152
GRID2	15	3	-3.87443	0.954491
MAML2	15	3	-3.93868	0.99586
CSMD3	15	3	-4.05568	0.971204
DANT2	15	3	-4.18319	1.00671
PTPRN2	16	3	-5.2518	1.887
CHL1	16	3	-5.2315	1.08136
HS6ST3	16	3	-5.28829	1.20246
GRIN2B	16	3	-5.5219	1.76989
FGF12	16	3	-4.91803	1.23357
CNTN5	16	3	-6.05148	1.15407
CDK14	16	3	-5.2321	1.01179
ERC2	16	3	-5.25231	1.37079
MKL2	16	3	-5.6179	1.64977
FAT3	16	3	-5.49402	1.58217
CACNA1A	16	3	-5.24069	1.03074
KCTD16	16	3	-5.88868	1.18603
ASTN1	16	3	-5.18221	1.24428
MYT1L	16	3	-5.11333	1.90657
CERS6	16	3	-5.20161	1.08115
ATP8A2	16	3	-5.6591	1.64956
GABRB3	16	3	-5.83245	1.44511
DCLK2	16	3	-5.28973	1.37147
SLC4A10	16	3	-6.12405	1.15423
OPHN1	16	3	-4.99617	0.766132
TMEM132B	16	3	-5.08638	1.49494
CADPS	16	3	-5.27703	1.65334
PCDH7	16	3	-4.88807	1.19257
THRB	16	3	-5.23809	1.08176
ZEB1	16	3	-5.30509	0.929395
RIMS1	16	3	-5.8349	1.23052
GRIA1	16	3	-5.68392	1.65914
CNKSR2	16	3	-5.61893	1.65152
AFF3	16	3	-5.38999	0.371223
SAMD4A	16	3	-5.40962	0.629962
DSCAM	16	3	-4.9261	1.05161
GRM7	16	3	-5.15374	1.1576
LRFN5	16	3	-5.48849	1.31176
XKR6	16	3	-5.27567	0.849068
KHDRBS2	16	3	-5.76567	1.45686
DAB1	16	3	-5.2081	1.22531
PTPRG	16	3	-5.04269	1.37089
GRM5	16	3	-5.1611	1.24904
SETBP1	16	3	-5.33362	0.406851
SYNE1	17	3	-2.9212	1.66485
ATP2B1	17	3	-3.432	2.00882
ARHGAP32	17	3	-2.57858	1.63014
TSC22D1	17	3	-3.18242	1.71122
CPEB4	17	3	-2.94393	1.7308
PHACTR1	17	3	-2.58484	1.76191
LINGO1	17	3	-2.39637	1.88292
CAMSAP2	17	3	-2.9714	1.69734
PPP3CA	17	3	-2.64205	1.60922
MYCBP2	17	3	-2.61573	1.52906
LARGE1	17	3	-2.62147	1.65397
PRKCE	17	3	-2.64303	1.50628
DTNA	17	3	-3.21525	1.54995
SLC5A3	17	3	-2.48399	1.93522
RFX3	17	3	-2.40051	1.45572
MAPK10	17	3	-2.88385	1.69108
SMYD3	17	3	-2.86183	1.57392
MSI2	17	3	-2.59771	1.75938
CPEB3	17	3	-2.62596	1.50667
SORBS1	17	3	-2.67138	1.85071
PDE4DIP	17	3	-2.29227	1.69712
SPIDR	17	3	-3.01847	1.38224
SMARCA2	17	3	-2.45457	1.81204
STXBP5	17	3	-2.62568	1.70073
FER	17	3	-2.75204	1.3957
FBXL17	17	3	-2.76155	1.53284
AHCYL2	17	3	-2.61578	1.83811
NAALAD2	17	3	-2.83822	1.73204
R3HDM1	17	3	-2.76097	1.5234
PLEKHA5	17	3	-2.67621	1.87916
TTC28	17	3	-2.94042	1.44091
SOS1	17	3	-2.43789	1.82607
RPS6KA2	17	3	-3.3582	1.41758
P4HA1	17	3	-2.52582	1.93646
ERC1	17	3	-2.38035	1.51307
NFAT5	17	3	-2.33649	1.69424
PRKD1	17	3	-3.01721	1.71632
GPC5	17	3	-2.9943	2.14517
AC241952.1	17	3	-2.35196	1.77133
LAMA4	18	3	-6.87015	-1.28909
ADGRB1	18	3	-7.14428	-1.55814
RAPGEF4	18	3	-6.54937	-1.24152
EMID1	18	3	-6.77301	-1.73914
KCND3	18	3	-6.56767	-1.53193
SDC3	18	3	-7.46181	-1.8093
MIR4697HG	18	3	-7.22196	-1.88183
TEK	18	3	-6.70115	-1.24601
CPNE5	18	3	-6.64281	-1.54014
RIT2	18	3	-7.08908	-1.75645
NTN4	18	3	-7.11813	-1.97978
EEF2K	18	3	-6.62376	-1.71212
SULF2	18	3	-6.96957	-1.60062
SORBS2	18	3	-6.58748	-1.26104
ANTXR1	18	3	-6.65115	-1.67713
MIAT	18	3	-6.98669	-1.41408
VWC2	18	3	-7.0761	-1.83814
FAM19A1	18	3	-6.72081	-1.71914
MYT1	18	3	-6.71398	-1.15495
CSMD2	18	3	-6.89594	-1.67244
THSD7A	18	3	-7.06814	-1.67195
SORCS1	18	3	-6.62108	-1.48209
GRIK3	18	3	-6.95551	-1.60688
GSG1L	18	3	-6.40371	-1.66059
NTNG1	18	3	-6.78909	-1.03654
PDE7B	18	3	-6.51716	-1.68399
NOS1	18	3	-7.04002	-1.85621
GFRA1	18	3	-6.86221	-1.31245
GRIK1	18	3	-6.6755	-1.25819
AMZ1	18	3	-7.18888	-1.80725
CACNG4	18	3	-6.85636	-1.44263
GHR	18	3	-7.13024	-1.7869
ADAMTS6	18	3	-7.08603	-1.80985
PXDN	18	3	-6.88981	-1.24132
LINC01965	18	3	-7.11231	-1.90577
KIAA1211	18	3	-6.75986	-1.51915
AC004852.2	18	3	-6.94774	-1.40142
LINC02223	18	3	-7.04948	-1.70375
MAP1B	19	1	8.32157	1.25713
ZNF638	19	1	8.19985	1.9654
DNM3	19	1	8.14119	1.98652
QKI	19	1	8.49642	1.92452
PCDH9	19	1	8.0119	2.11364
CDC42BPA	19	1	8.0323	2.34686
MALAT1	19	1	8.07315	1.56355
NCAM2	19	1	8.05316	2.1473
ATXN1	19	1	8.04662	2.18725
LUC7L3	19	1	8.02089	1.65778
MBNL1	19	1	8.1993	1.79253
2022-03-01	19	1	7.99159	2.29415
DST	19	1	8.28181	1.81106
SPTBN1	19	1	8.29049	1.90355
DDX17	19	1	8.05707	1.62399
DIP2C	19	1	8.42102	1.8478
CLASP2	19	1	8.00054	2.28359
NCAM1	19	1	8.01759	1.91793
KIF1B	19	1	8.31435	1.98283
ZBTB20	19	1	7.93403	2.06741
DLG2	19	1	8.13331	2.10286
CCDC88A	19	1	8.34758	2.092
GPHN	19	1	7.90914	1.98204
SSBP2	19	1	8.317	1.827
TBC1D5	19	1	8.09142	1.92804
BAZ2B	19	1	8.02007	1.93612
DOCK9	19	1	8.05774	2.12664
WWOX	19	1	7.95108	2.05993
KMT2C	19	1	8.03243	1.71428
RERE	19	1	7.88794	2.01044
USP34	19	1	8.09078	1.65965
GRID1	19	1	7.91503	2.1392
PKP4	19	1	8.01681	2.20372
WDFY3	19	1	8.07954	1.78114
MAP4K5	19	1	8.61535	1.79554
FKBP5	19	1	8.23391	1.86505
FAM13A	20	3	-4.44658	-2.2437
SYT17	20	3	-4.74892	-2.09232
IGSF21	20	3	-4.52487	-2.07325
ANO6	20	3	-4.92206	-2.20876
GRAMD1B	20	3	-4.39751	-2.05405
RNF175	20	3	-4.82611	-2.21637
NBPF14	20	3	-4.94326	-2.29037
ADGRG1	20	3	-4.86894	-2.10883
PIP5K1B	20	3	-4.17725	-2.1752
FMNL3	20	3	-4.29534	-1.74536
LRP1	20	3	-5.21231	-2.15396
PLEKHA2	20	3	-4.38218	-2.26175
NBPF19	20	3	-4.92938	-2.27963
GOLIM4	20	3	-5.22921	-2.35472
SLC18B1	20	3	-4.80281	-2.19348
LRRFIP1	20	3	-4.34731	-2.08713
RAB31	20	3	-4.83103	-2.07612
LRRK2	20	3	-4.95305	-1.939
TRERF1	20	3	-4.93574	-1.78029
ARHGEF6	20	3	-4.72241	-2.15895
PARP8	20	3	-4.57367	-2.1604
SMAD3	20	3	-4.8004	-2.10503
CHST11	20	3	-4.38522	-1.83292
CSGALNACT1	20	3	-4.2982	-1.86205
PTPRE	20	3	-4.49359	-2.14267
MEF2C-AS1	20	3	-4.56299	-2.16942
ITPR2	20	3	-4.20604	-2.0317
PDGFC	20	3	-4.87698	-2.11201
PCNX2	20	3	-4.18635	-1.80509
NOTCH2	20	3	-4.99027	-2.32304
ITGA9	20	3	-4.6025	-2.10863
RBMS1	20	3	-4.63079	-2.21728
LIMD1	20	3	-5.25788	-2.05667
GSAP	20	3	-4.30948	-1.96852
DIAPH2	20	3	-4.18797	-2.12455
DISC1	20	3	-4.47831	-2.00225
TSPAN7	21	3	-8.17313	-2.01662
FXYD6	21	3	-8.07574	-2.27451
SCG3	21	3	-8.13269	-2.06412
MAGED4	21	3	-8.02751	-2.3653
GLDC	21	3	-7.66379	-1.25285
FABP7	21	3	-8.09553	-2.11557
MARCKS	21	3	-8.01497	-2.37194
GPR37L1	21	3	-7.92533	-1.91502
BCAN	21	3	-7.98115	-2.33701
ASCL1	21	3	-8.03878	-2.30096
OLIG1	21	3	-7.97861	-2.26616
PHLDA1	21	3	-7.9802	-2.2976
NKAIN4	21	3	-7.97652	-2.01217
CSPG5	21	3	-7.47376	-1.15414
TRIB2	21	3	-7.36558	-1.12368
NEU4	21	3	-7.96559	-2.00346
TMEM100	21	3	-7.84509	-2.56938
ANKRD20A3	21	3	-7.94179	-1.41275
PDGFRA	21	3	-7.78101	-2.22546
BLM	21	3	-7.58078	-2.45498
C1QL2	21	3	-8.05193	-2.28246
SLITRK3	21	3	-7.91326	-2.27381
C1QL1	21	3	-7.79648	-2.12853
HAP1	21	3	-7.80003	-1.39161
U91319.1	21	3	-7.57838	-1.3086
CU633967.1	21	3	-7.83711	-1.58183
B3GNT7	21	3	-8.01117	-2.01347
ANKRD20A4	21	3	-7.96118	-1.40658
ANKRD20A1	21	3	-7.94103	-1.42946
GALR1	21	3	-7.49236	-1.39654
ANKRD20A2	21	3	-7.94768	-1.37886
CSPG4	21	3	-7.62171	-2.09303
ADAMTS9	21	3	-7.80869	-1.41932
CALCRL	21	3	-7.94955	-2.3604
BEST3	21	3	-7.76505	-1.38343
ANKRD20A7P	21	3	-7.90173	-1.43894
FAM110B	22	3	-5.27909	-1.76408
SNX7	22	3	-5.65786	-1.05179
UNC80	22	3	-5.70367	-1.02225
RALGPS2	22	3	-5.28084	-1.81062
PTPRZ1	22	3	-5.92119	-1.5798
C1orf21	22	3	-5.75538	-1.24747
ARHGEF4	22	3	-5.8814	-1.22203
SEMA5A	22	3	-5.76019	-1.89534
TNK2	22	3	-5.70522	-1.63227
PID1	22	3	-5.68648	-1.35222
TNR	22	3	-5.66908	-1.63943
CDH18	22	3	-5.73244	-1.23537
NRG2	22	3	-5.8611	-1.14367
SOX6	22	3	-5.66579	-1.76913
NUPL2	22	3	-5.72306	-1.35187
MMP16	22	3	-5.78569	-1.61238
NLGN4X	22	3	-5.65214	-1.32307
PCDH15	22	3	-5.93005	-1.4567
GLCCI1	22	3	-5.52385	-1.54712
LUZP2	22	3	-5.70853	-1.64325
RNF150	22	3	-5.41887	-0.99686
DPY19L2	22	3	-5.7665	-1.7182
AFAP1	22	3	-6.04392	-1.73276
CCDC50	22	3	-5.58339	-1.9465
SMOC1	22	3	-5.59925	-1.55294
NTN1	22	3	-5.82543	-1.74312
LINC00511	22	3	-5.60527	-1.58553
KLF12	22	3	-5.62208	-1.3866
SEMA3E	22	3	-5.99328	-1.77553
PCSK5	22	3	-5.70098	-1.41983
MEGF11	22	3	-5.76886	-1.69287
AL445250.1	22	3	-5.67474	-1.33568
NEFL	23	3	-2.6859	3.98875
VSNL1	23	3	-2.6879	3.98687
PCLO	23	3	-3.68233	3.04079
STMN2	23	3	-2.69727	3.97817
NRGN	23	3	-2.65401	4.01886
CCK	23	3	-2.69332	3.9811
SYT1	23	3	-2.90504	3.78287
OLFM1	23	3	-2.69476	3.97779
SNAP25	23	3	-2.69317	3.9806
FRMPD4	23	3	-3.63688	3.34385
DCLK1	23	3	-3.69575	3.24657
KCNQ5	23	3	-3.63362	3.32033
MGAT4C	23	3	-3.54747	3.30468
EFNA5	23	3	-3.54699	3.42273
TRPM3	23	3	-3.56607	3.32908
TENM2	23	3	-3.64328	3.31896
GRIP1	23	3	-3.83407	2.87566
RGS6	23	3	-3.54596	3.48911
DLGAP2	23	3	-3.59449	3.36449
DOCK7	23	3	-3.51311	3.11757
ABLIM1	23	3	-3.63121	3.18383
CACNA1B	23	3	-3.62608	3.40135
DAPK1	23	3	-3.56264	3.40449
ROBO2	23	3	-3.52553	3.24234
AGBL4	23	3	-3.80094	2.8738
ADGRV1	23	3	-3.55689	3.31588
RYR3	23	3	-3.54054	3.39041
PRKG1	23	3	-3.69688	3.09869
EPHA6	23	3	-3.61972	3.28717
MEF2C	24	3	-3.72415	2.28403
CPE	24	3	-4.10302	2.28936
CHN1	24	3	-3.6	2.5103
NSF	24	3	-3.31291	2.09374
PRKCB	24	3	-3.53198	2.51873
GNAS	24	3	-3.81577	2.34207
SPARCL1	24	3	-4.06898	2.27034
JAZF1	24	3	-3.67395	1.87708
CAMK1D	24	3	-3.84492	2.42715
CMIP	24	3	-3.75382	2.14762
KALRN	24	3	-3.91313	2.70657
CELF2	24	3	-3.80289	2.22284
OXR1	24	3	-3.75008	2.20235
COPG2	24	3	-3.50143	2.4467
ARHGAP26	24	3	-3.70463	2.42028
FRMD4A	24	3	-3.46317	2.05918
ADCY2	24	3	-3.93021	2.78846
CACNB2	24	3	-3.80031	2.83833
RASAL2	24	3	-3.75366	2.25565
ABR	24	3	-3.78832	2.28826
PACS1	24	3	-3.83528	2.08145
GABRB1	24	3	-4.30673	2.32564
FMN2	24	3	-4.06178	2.50447
LDLRAD4	24	3	-3.5903	2.10225
KCNQ3	24	3	-3.86784	2.17092
TENM4	24	3	-3.79721	2.76479
BASP1	25	3	-7.73229	0.394957
NSG2	25	3	-7.71005	0.109918
SLIT1	25	3	-7.61804	-0.0784
PRKAR1B	25	3	-7.71666	0.342653
CCND2	25	3	-7.6043	0.327635
PAK3	25	3	-7.61691	0.37836
DNM1	25	3	-7.6602	0.548555
PLPPR4	25	3	-7.67592	0.017336
RAB3C	25	3	-7.6251	0.415935
RGS7BP	25	3	-7.60636	0.188688
ELAVL4	25	3	-7.67199	0.14169
ELMOD1	25	3	-7.49294	-0.30719
SYN2	25	3	-7.58828	0.468913
ADCY1	25	3	-7.56931	0.422333
NELL2	25	3	-7.43778	0.658105
CRMP1	25	3	-7.56589	-0.03501
ATP2B2	25	3	-7.60054	0.394768
CACNG2	25	3	-7.21773	0.147338
SCN1A	25	3	-7.53122	-0.37741
LMO3	25	3	-7.80591	0.048712
JPH4	25	3	-7.71908	0.210943
NMNAT2	25	3	-7.45304	0.133064
TUB	25	3	-7.31932	-0.08797
SCN2A	25	3	-7.59706	0.074042
ATCAY	25	3	-7.57104	0.158674
QDPR	26	1	10.0879	1.07295
GPM6B	26	1	10.3086	0.89995
GLUL	26	1	9.95563	0.924547
PTP4A2	26	1	10.253	1.10858
CNDP1	26	1	10.0485	1.08426
AMER2	26	1	10.4385	1.16283
AMD1	26	1	10.0067	1.10283
TPPP	26	1	10.5433	1.70369
GPRC5B	26	1	10.3722	1.11124
SLC38A2	26	1	10.1057	1.02707
SLC6A15	26	1	9.90031	1.20965
ANLN	26	1	10.4954	1.34829
ADIPOR2	26	1	10.3063	1.46899
KCNJ2	26	1	10.5849	1.24679
NDRG1	26	1	10.4339	1.23748
PLA2G16	26	1	10.4607	1.28488
EFHD1	26	1	10.418	1.63867
SLC12A2	26	1	10.3534	1.28072
LAMP2	26	1	10.3774	1.12787
HAPLN2	26	1	10.3848	0.879105
ADAM10	26	1	9.92798	1.14215
USP31	26	1	10.2898	1.24307
TMPRSS5	26	1	10.681	1.51089
SELENOP	26	1	10.493	1.33248
RAB27B	27	3	-7.05472	0.087458
MCTP1	27	3	-6.60631	0.443551
PTPRT	27	3	-6.73503	0.248685
AMPH	27	3	-7.0924	0.232121
DOK6	27	3	-7.10818	0.203976
TUSC3	27	3	-7.01245	0.001458
KSR2	27	3	-6.57971	0.54884
NETO1	27	3	-7.07284	0.124981
NCALD	27	3	-6.74846	0.17589
PLXNA4	27	3	-7.12043	0.321314
KCNH5	27	3	-6.75307	0.339512
UNC5D	27	3	-6.59989	0.579351
CADPS2	27	3	-6.94225	-0.033
AC004540.1	27	3	-6.75945	0.320976
EPHA5	27	3	-6.9014	0.004236
FAM19A2	27	3	-6.57434	0.020471
ZNF385D	27	3	-6.91368	0.202773
CNTN4	27	3	-6.57208	0.554013
NELL1	27	3	-6.76272	0.177609
SYT16	27	3	-7.08495	0.014635
SYN3	27	3	-6.83305	0.344128
SGCZ	27	3	-6.75521	0.270978
SAT1	28	3	-3.78513	-2.429
UTRN	28	3	-3.78067	-2.41696
ETV6	28	3	-3.83345	-2.36072
ST6GAL1	28	3	-3.91657	-2.33055
CHST15	28	3	-3.83218	-2.39526
MTHFD1L	28	3	-3.77821	-2.42099
PDE3B	28	3	-3.764	-2.43522
LRMDA	28	3	-4.09172	-2.11898
NHSL1	28	3	-3.92014	-2.34413
LHFPL2	28	3	-3.96265	-2.15376
AKAP13	28	3	-3.81768	-2.37553
PARP14	28	3	-3.87876	-2.32681
PRKAG2	28	3	-3.83859	-2.36292
OSBPL3	28	3	-3.91183	-2.40147
STAMBPL1	28	3	-4.03527	-2.2691
ZFHX3	28	3	-3.80258	-2.38734
SH3RF3	28	3	-3.77259	-2.42974
LRCH1	28	3	-3.77286	-2.42979
MERTK	28	3	-3.57101	-2.6316
SDK1	28	3	-3.89184	-2.31548
ZC3HAV1	28	3	-3.85987	-2.37842
ARHGAP6	28	3	-3.80031	-2.39918
BMPER	29	3	-5.59694	-3.30632
SOX4	29	3	-5.78688	-3.24004
EPHB1	29	3	-5.51254	-3.13007
TMEM108	29	3	-5.55592	-2.93408
SLC2A13	29	3	-5.48974	-2.81945
PLEKHA6	29	3	-5.57793	-3.04786
TMEM163	29	3	-5.52627	-3.00599
GNG2	29	3	-5.49803	-2.97717
MIR9-3HG	29	3	-5.65053	-3.03636
BRINP1	29	3	-5.60582	-2.96536
TNFRSF21	29	3	-5.52933	-3.0188
MPZL1	29	3	-5.45142	-2.74106
PCDH11X	29	3	-5.60957	-2.93318
LIMS2	29	3	-5.58777	-3.19581
PRICKLE1	29	3	-5.55676	-3.20428
PCDH11Y	29	3	-5.66849	-2.92878
TNS3	29	3	-5.46583	-2.8646
PTPRO	29	3	-5.58294	-2.98001
SLC16A10	29	3	-5.539	-3.11773
SEMA5B	29	3	-5.57325	-3.21945
GPR17	29	3	-5.58023	-3.20738

## Sheet: module_GO
query	significant	p_value	term_size	query_size	intersection_size	precision	recall	term_id	source	term_name	effective_domain_size	source_order	parents	module	negative_log10_of_adjusted_p_value	term_overlap
query_1	TRUE	0.0175524	2428	71	22	0.309859	0.00906096	GO:0007399	GO:BP	nervous system development	21029	3278	GO:0048731	1	1.75566	0.00906096
query_1	TRUE	0.0356627	97	71	5	0.0704225	0.0515464	GO:0048709	GO:BP	oligodendrocyte differentiation	21029	15023	GO:0007417|GO:0010001	1	1.44779	0.0515464
query_1	TRUE	0.0071385	2076	71	19	0.267606	0.00915222	GO:0030054	GO:CC	cell junction	21672	1025	GO:0110165	1	2.14639	0.00915222
query_1	TRUE	0.0172928	6181	71	36	0.507042	0.0058243	GO:0071944	GO:CC	cell periphery	21672	3128	GO:0110165	1	1.76213	0.0058243
query_1	TRUE	0.019371	1305	71	14	0.197183	0.010728	GO:0045202	GO:CC	synapse	21672	2443	GO:0030054	1	1.71285	0.010728
query_1	TRUE	0.0177764	3	70	2	0.0285714	0.666667	GO:0004117	GO:MF	calmodulin-dependent cyclic-nucleotide phosphodiesterase activity	20166	765	GO:0004114	1	1.75016	0.666667
query_1	TRUE	0.0177764	3	70	2	0.0285714	0.666667	GO:0048101	GO:MF	calcium- and calmodulin-regulated 3',5'-cyclic-GMP phosphodiesterase activity	20166	8371	GO:0047555	1	1.75016	0.666667
query_1	TRUE	0.0257255	4	38	2	0.0526316	0.5	REAC:R-HSA-111957	REAC	Cam-PDE 1 activation	10760	286	REAC:R-HSA-111933	1	1.58964	0.5
query_1	TRUE	0.0496609	4	15	2	0.133333	0.5	CORUM:2536	CORUM	PLC-gamma-2-SLP-76-Lyn-Grb2 complex	3627	1076	CORUM:0000000	2	1.30399	0.5
query_1	TRUE	1.3361e-15	2748	68	40	0.588235	0.014556	GO:0002376	GO:BP	immune system process	21029	1029	GO:0008150	2	14.8742	0.014556
query_1	TRUE	1.46772e-14	1423	68	30	0.441176	0.0210822	GO:0002682	GO:BP	regulation of immune system process	21029	1323	GO:0002376|GO:0050789	2	13.8334	0.0210822
query_1	TRUE	3.76231e-12	1888	68	31	0.455882	0.0164195	GO:0006955	GO:BP	immune response	21029	2890	GO:0002376|GO:0050896	2	11.4245	0.0164195
query_1	TRUE	1.6012e-11	947	68	23	0.338235	0.0242872	GO:0045321	GO:BP	leukocyte activation	21029	13229	GO:0001775|GO:0002376	2	10.7956	0.0242872
query_1	TRUE	2.67732e-11	3841	68	41	0.602941	0.0106743	GO:0048583	GO:BP	regulation of response to stimulus	21029	14909	GO:0050789|GO:0050896	2	10.5723	0.0106743
query_1	TRUE	4.74113e-11	888	68	22	0.323529	0.0247748	GO:0050776	GO:BP	regulation of immune response	21029	15328	GO:0002682|GO:0006955|GO:0048583	2	10.3241	0.0247748
query_1	TRUE	9.72488e-11	920	68	22	0.323529	0.023913	GO:0002684	GO:BP	positive regulation of immune system process	21029	1325	GO:0002376|GO:0002682|GO:0048518	2	10.0121	0.023913
query_1	TRUE	2.6585e-10	1082	68	23	0.338235	0.0212569	GO:0001775	GO:BP	cell activation	21029	552	GO:0009987	2	9.57536	0.0212569
query_1	TRUE	6.36633e-09	788	68	19	0.279412	0.0241117	GO:0046649	GO:BP	lymphocyte activation	21029	14279	GO:0045321	2	8.19611	0.0241117
query_1	TRUE	1.38262e-08	718	68	18	0.264706	0.0250696	GO:0001817	GO:BP	regulation of cytokine production	21029	586	GO:0001816|GO:0010468|GO:0051239	2	7.8593	0.0250696
query_1	TRUE	1.58669e-08	724	68	18	0.264706	0.0248619	GO:0001816	GO:BP	cytokine production	21029	585	GO:0010467|GO:0032501	2	7.79951	0.0248619
query_1	TRUE	2.36174e-08	181	68	11	0.161765	0.0607735	GO:0050777	GO:BP	negative regulation of immune response	21029	15329	GO:0002683|GO:0006955|GO:0048585|GO:0050776	2	7.62677	0.0607735
query_1	TRUE	3.1607e-08	652	68	17	0.25	0.0260736	GO:0002252	GO:BP	immune effector process	21029	907	GO:0002376	2	7.50022	0.0260736
query_1	TRUE	5.50682e-08	325	68	13	0.191176	0.04	GO:0070661	GO:BP	leukocyte proliferation	21029	19010	GO:0008283	2	7.2591	0.04
query_1	TRUE	7.45776e-08	589	68	16	0.235294	0.0271647	GO:0050778	GO:BP	positive regulation of immune response	21029	15330	GO:0002684|GO:0006955|GO:0048584|GO:0050776	2	7.12739	0.0271647
query_1	TRUE	8.25202e-08	414	68	14	0.205882	0.0338164	GO:0002683	GO:BP	negative regulation of immune system process	21029	1324	GO:0002376|GO:0002682|GO:0048519	2	7.08344	0.0338164
query_1	TRUE	1.33079e-07	5925	68	45	0.661765	0.00759494	GO:0007165	GO:BP	signal transduction	21029	3067	GO:0007154|GO:0009987|GO:0023052|GO:0050794|GO:0051716	2	6.87589	0.00759494
query_1	TRUE	1.88234e-07	285	68	12	0.176471	0.0421053	GO:0002366	GO:BP	leukocyte activation involved in immune response	21029	1021	GO:0002263|GO:0045321	2	6.7253	0.0421053
query_1	TRUE	2.21031e-07	289	68	12	0.176471	0.0415225	GO:0002263	GO:BP	cell activation involved in immune response	21029	918	GO:0001775|GO:0002252|GO:0006955	2	6.65555	0.0415225
query_1	TRUE	2.58407e-07	226	68	11	0.161765	0.0486726	GO:0002274	GO:BP	myeloid leukocyte activation	21029	929	GO:0045321	2	6.5877	0.0486726
query_1	TRUE	2.79993e-07	295	68	12	0.176471	0.040678	GO:0046651	GO:BP	lymphocyte proliferation	21029	14280	GO:0032943|GO:0046649	2	6.55285	0.040678
query_1	TRUE	3.26857e-07	299	68	12	0.176471	0.0401338	GO:0032943	GO:BP	mononuclear cell proliferation	21029	9144	GO:0070661	2	6.48564	0.0401338
query_1	TRUE	3.38242e-07	1687	68	24	0.352941	0.0142264	GO:0006952	GO:BP	defense response	21029	2887	GO:0006950	2	6.47077	0.0142264
query_1	TRUE	4.76419e-07	8815	68	54	0.794118	0.00612592	GO:0050896	GO:BP	response to stimulus	21029	15425	GO:0008150	2	6.32201	0.00612592
query_1	TRUE	4.86118e-07	6411	68	46	0.676471	0.00717517	GO:0023052	GO:BP	signaling	21029	7654	GO:0008150	2	6.31326	0.00717517
query_1	TRUE	4.94618e-07	310	68	12	0.176471	0.0387097	GO:0002429	GO:BP	immune response-activating cell surface receptor signaling pathway	21029	1075	GO:0002757|GO:0002768	2	6.30573	0.0387097
query_1	TRUE	4.94618e-07	310	68	12	0.176471	0.0387097	GO:0002757	GO:BP	immune response-activating signal transduction	21029	1392	GO:0002253|GO:0002764	2	6.30573	0.0387097
query_1	TRUE	5.9273e-07	394	68	13	0.191176	0.0329949	GO:0002253	GO:BP	activation of immune response	21029	908	GO:0002376|GO:0050778	2	6.22714	0.0329949
query_1	TRUE	6.61944e-07	6465	68	46	0.676471	0.00711524	GO:0007154	GO:BP	cell communication	21029	3056	GO:0009987	2	6.17918	0.00711524
query_1	TRUE	6.94741e-07	248	68	11	0.161765	0.0443548	GO:0070663	GO:BP	regulation of leukocyte proliferation	21029	19012	GO:0042127|GO:0070661	2	6.15818	0.0443548
query_1	TRUE	7.7179e-07	491	68	14	0.205882	0.0285132	GO:0002764	GO:BP	immune response-regulating signaling pathway	21029	1399	GO:0007165|GO:0050776	2	6.1125	0.0285132
query_1	TRUE	9.76962e-07	500	68	14	0.205882	0.028	GO:0042110	GO:BP	T cell activation	21029	11550	GO:0046649	2	6.01012	0.028
query_1	TRUE	9.97761e-07	2639	68	29	0.426471	0.010989	GO:0035556	GO:BP	intracellular signal transduction	21029	10475	GO:0007165	2	6.00097	0.010989
query_1	TRUE	1.2499e-06	1491	68	22	0.323529	0.0147552	GO:0044093	GO:BP	positive regulation of molecular function	21029	12646	GO:0065009	2	5.90312	0.0147552
query_1	TRUE	1.32606e-06	338	68	12	0.176471	0.035503	GO:0002768	GO:BP	immune response-regulating cell surface receptor signaling pathway	21029	1403	GO:0002764|GO:0007166	2	5.87744	0.035503
query_1	TRUE	1.42592e-06	614	68	15	0.220588	0.02443	GO:0002694	GO:BP	regulation of leukocyte activation	21029	1335	GO:0002682|GO:0045321|GO:0050865	2	5.8459	0.02443
query_1	TRUE	1.5666e-06	343	68	12	0.176471	0.0349854	GO:0002697	GO:BP	regulation of immune effector process	21029	1338	GO:0002252|GO:0002682	2	5.80504	0.0349854
query_1	TRUE	1.75802e-06	204	68	10	0.147059	0.0490196	GO:0042098	GO:BP	T cell proliferation	21029	11545	GO:0042110|GO:0046651	2	5.75498	0.0490196
query_1	TRUE	2.07522e-06	101	68	8	0.117647	0.0792079	GO:0042116	GO:BP	macrophage activation	21029	11552	GO:0002274	2	5.68294	0.0792079
query_1	TRUE	3.36579e-06	367	68	12	0.176471	0.0326975	GO:0007159	GO:BP	leukocyte cell-cell adhesion	21029	3061	GO:0098609	2	5.47291	0.0326975
query_1	TRUE	3.73874e-06	659	68	15	0.220588	0.0227618	GO:0050865	GO:BP	regulation of cell activation	21029	15399	GO:0001775|GO:0050794	2	5.42727	0.0227618
query_1	TRUE	3.78229e-06	890	68	17	0.25	0.0191011	GO:0030097	GO:BP	hemopoiesis	21029	7706	GO:0048534	2	5.42224	0.0191011
query_1	TRUE	4.01802e-06	558	68	14	0.205882	0.0250896	GO:0002521	GO:BP	leukocyte differentiation	21029	1166	GO:0030097|GO:0030154	2	5.39599	0.0250896
query_1	TRUE	5.15424e-06	228	68	10	0.147059	0.0438596	GO:0002703	GO:BP	regulation of leukocyte mediated immunity	21029	1344	GO:0002443|GO:0002697	2	5.28784	0.0438596
query_1	TRUE	5.15424e-06	228	68	10	0.147059	0.0438596	GO:0050670	GO:BP	regulation of lymphocyte proliferation	21029	15270	GO:0032944|GO:0046651|GO:0051249	2	5.28784	0.0438596
query_1	TRUE	5.7742e-06	2111	68	25	0.367647	0.0118427	GO:0048584	GO:BP	positive regulation of response to stimulus	21029	14910	GO:0048518|GO:0048583|GO:0050896	2	5.23851	0.0118427
query_1	TRUE	5.84512e-06	231	68	10	0.147059	0.04329	GO:0032944	GO:BP	regulation of mononuclear cell proliferation	21029	9145	GO:0032943|GO:0070663	2	5.23321	0.04329
query_1	TRUE	6.32998e-06	306	68	11	0.161765	0.0359477	GO:0006909	GO:BP	phagocytosis	21029	2851	GO:0016192	2	5.1986	0.0359477
query_1	TRUE	6.4255e-06	922	68	17	0.25	0.0184382	GO:0034097	GO:BP	response to cytokine	21029	9678	GO:0010033	2	5.19209	0.0184382
query_1	TRUE	7.1948e-06	929	68	17	0.25	0.0182992	GO:0048534	GO:BP	hematopoietic or lymphoid organ development	21029	14868	GO:0002520|GO:0048513	2	5.14298	0.0182992
query_1	TRUE	7.57524e-06	1488	68	21	0.308824	0.0141129	GO:0051707	GO:BP	response to other organism	21029	16071	GO:0043207|GO:0044419	2	5.1206	0.0141129
query_1	TRUE	7.85109e-06	1491	68	21	0.308824	0.0140845	GO:0043207	GO:BP	response to external biotic stimulus	21029	12207	GO:0009605|GO:0009607	2	5.10507	0.0140845
query_1	TRUE	8.91251e-06	493	68	13	0.191176	0.0263692	GO:0019221	GO:BP	cytokine-mediated signaling pathway	21029	6479	GO:0007166|GO:0071345	2	5.05	0.0263692
query_1	TRUE	1.03988e-05	828	68	16	0.235294	0.0193237	GO:0071345	GO:BP	cellular response to cytokine stimulus	21029	19392	GO:0034097|GO:0071310	2	4.98301	0.0193237
query_1	TRUE	1.06193e-05	712	68	15	0.220588	0.0210674	GO:0002250	GO:BP	adaptive immune response	21029	905	GO:0006955	2	4.9739	0.0210674
query_1	TRUE	1.22594e-05	1529	68	21	0.308824	0.0137345	GO:0009607	GO:BP	response to biotic stimulus	21029	3981	GO:0050896	2	4.91153	0.0137345
query_1	TRUE	1.25564e-05	1688	68	22	0.323529	0.0130332	GO:1902531	GO:BP	regulation of intracellular signal transduction	21029	25714	GO:0009966|GO:0035556	2	4.90114	0.0130332
query_1	TRUE	1.32581e-05	2752	68	28	0.411765	0.0101744	GO:0009605	GO:BP	response to external stimulus	21029	3979	GO:0050896	2	4.87752	0.0101744
query_1	TRUE	1.57017e-05	188	68	9	0.132353	0.0478723	GO:0002695	GO:BP	negative regulation of leukocyte activation	21029	1336	GO:0002683|GO:0002694|GO:0045321|GO:0050866	2	4.80405	0.0478723
query_1	TRUE	1.57498e-05	7346	68	47	0.691176	0.00639804	GO:0051716	GO:BP	cellular response to stimulus	21029	16079	GO:0009987|GO:0050896	2	4.80272	0.00639804
query_1	TRUE	1.70322e-05	2783	68	28	0.411765	0.0100611	GO:0007166	GO:BP	cell surface receptor signaling pathway	21029	3068	GO:0007165	2	4.76873	0.0100611
query_1	TRUE	1.74729e-05	259	68	10	0.147059	0.03861	GO:0050851	GO:BP	antigen receptor-mediated signaling pathway	21029	15385	GO:0002429	2	4.75764	0.03861
query_1	TRUE	1.77027e-05	987	68	17	0.25	0.0172239	GO:0002520	GO:BP	immune system development	21029	1165	GO:0002376|GO:0048731	2	4.75196	0.0172239
query_1	TRUE	1.80024e-05	523	68	13	0.191176	0.0248566	GO:0051249	GO:BP	regulation of lymphocyte activation	21029	15719	GO:0002694|GO:0046649	2	4.74467	0.0248566
query_1	TRUE	2.05889e-05	1421	68	20	0.294118	0.0140746	GO:0051240	GO:BP	positive regulation of multicellular organismal process	21029	15713	GO:0032501|GO:0048518|GO:0051239	2	4.68637	0.0140746
query_1	TRUE	2.27854e-05	3017	68	29	0.426471	0.0096122	GO:0065009	GO:BP	regulation of molecular function	21029	18630	GO:0065007	2	4.64234	0.0096122
query_1	TRUE	2.36658e-05	756	68	15	0.220588	0.0198413	GO:0006954	GO:BP	inflammatory response	21029	2889	GO:0006952	2	4.62588	0.0198413
query_1	TRUE	2.48809e-05	439	68	12	0.176471	0.0273349	GO:0045785	GO:BP	positive regulation of cell adhesion	21029	13523	GO:0007155|GO:0030155|GO:0048522	2	4.60413	0.0273349
query_1	TRUE	2.48809e-05	439	68	12	0.176471	0.0273349	GO:1903131	GO:BP	mononuclear cell differentiation	21029	26239	GO:0002521	2	4.60413	0.0273349
query_1	TRUE	3.06314e-05	1940	68	23	0.338235	0.0118557	GO:0008283	GO:BP	cell population proliferation	21029	3569	GO:0009987	2	4.51383	0.0118557
query_1	TRUE	3.41245e-05	93	68	7	0.102941	0.0752688	GO:0050764	GO:BP	regulation of phagocytosis	21029	15316	GO:0006909|GO:0060627	2	4.46693	0.0752688
query_1	TRUE	3.92726e-05	1634	68	21	0.308824	0.0128519	GO:0044419	GO:BP	biological process involved in interspecies interaction between organisms	21029	12795	GO:0008150	2	4.40591	0.0128519
query_1	TRUE	4.07547e-05	1480	68	20	0.294118	0.0135135	GO:0007155	GO:BP	cell adhesion	21029	3057	GO:0009987|GO:0022610	2	4.38982	0.0135135
query_1	TRUE	4.10417e-05	210	68	9	0.132353	0.0428571	GO:0050866	GO:BP	negative regulation of cell activation	21029	15400	GO:0001775|GO:0048523|GO:0050865	2	4.38677	0.0428571
query_1	TRUE	4.40962e-05	1487	68	20	0.294118	0.0134499	GO:0022610	GO:BP	biological adhesion	21029	7608	GO:0008150	2	4.3556	0.0134499
query_1	TRUE	6.06142e-05	381	68	11	0.161765	0.0288714	GO:0050900	GO:BP	leukocyte migration	21029	15428	GO:0002376|GO:0016477	2	4.21743	0.0288714
query_1	TRUE	7.88978e-05	391	68	11	0.161765	0.028133	GO:0030099	GO:BP	myeloid cell differentiation	21029	7708	GO:0030097|GO:0030154	2	4.10294	0.028133
query_1	TRUE	9.1274e-05	1104	68	17	0.25	0.0153986	GO:0043085	GO:BP	positive regulation of catalytic activity	21029	12141	GO:0044093|GO:0050790	2	4.03965	0.0153986
query_1	TRUE	0.000100074	165	68	8	0.117647	0.0484848	GO:0071706	GO:BP	tumor necrosis factor superfamily cytokine production	21029	19703	GO:0001816	2	3.99968	0.0484848
query_1	TRUE	0.000100074	165	68	8	0.117647	0.0484848	GO:1903555	GO:BP	regulation of tumor necrosis factor superfamily cytokine production	21029	26612	GO:0001817|GO:0071706	2	3.99968	0.0484848
query_1	TRUE	0.000108002	235	68	9	0.132353	0.0382979	GO:0030595	GO:BP	leukocyte chemotaxis	21029	7925	GO:0050900|GO:0060326	2	3.96657	0.0382979
query_1	TRUE	0.00011833	1124	68	17	0.25	0.0151246	GO:0098542	GO:BP	defense response to other organism	21029	22010	GO:0006952|GO:0051707	2	3.92691	0.0151246
query_1	TRUE	0.000124777	239	68	9	0.132353	0.0376569	GO:1903039	GO:BP	positive regulation of leukocyte cell-cell adhesion	21029	26155	GO:0007159|GO:0022409|GO:1903037	2	3.90387	0.0376569
query_1	TRUE	0.00012761	410	68	11	0.161765	0.0268293	GO:0002696	GO:BP	positive regulation of leukocyte activation	21029	1337	GO:0002684|GO:0002694|GO:0045321|GO:0050867	2	3.89412	0.0268293
query_1	TRUE	0.000143701	1597	68	20	0.294118	0.0125235	GO:0016192	GO:BP	vesicle-mediated transport	21029	5747	GO:0006810	2	3.84254	0.0125235
query_1	TRUE	0.000144375	173	68	8	0.117647	0.0462428	GO:0042129	GO:BP	regulation of T cell proliferation	21029	11563	GO:0042098|GO:0050670|GO:0050863	2	3.84051	0.0462428
query_1	TRUE	0.000148909	244	68	9	0.132353	0.0368852	GO:0071216	GO:BP	cellular response to biotic stimulus	21029	19269	GO:0009607|GO:0051716	2	3.82708	0.0368852
query_1	TRUE	0.000154389	1604	68	20	0.294118	0.0124688	GO:0048585	GO:BP	negative regulation of response to stimulus	21029	14911	GO:0048519|GO:0048583|GO:0050896	2	3.81138	0.0124688
query_1	TRUE	0.000166311	329	68	10	0.147059	0.0303951	GO:1903037	GO:BP	regulation of leukocyte cell-cell adhesion	21029	26153	GO:0007159|GO:0022407	2	3.77908	0.0303951
query_1	TRUE	0.000166687	421	68	11	0.161765	0.0261283	GO:0050867	GO:BP	positive regulation of cell activation	21029	15401	GO:0001775|GO:0048522|GO:0050865	2	3.7781	0.0261283
query_1	TRUE	0.000183539	527	68	12	0.176471	0.0227704	GO:0060627	GO:BP	regulation of vesicle-mediated transport	21029	17401	GO:0016192|GO:0050794|GO:0051049	2	3.73627	0.0227704
query_1	TRUE	0.00020145	429	68	11	0.161765	0.025641	GO:0002443	GO:BP	leukocyte mediated immunity	21029	1089	GO:0002252	2	3.69583	0.025641
query_1	TRUE	0.00020763	892	68	15	0.220588	0.0168161	GO:0045087	GO:BP	innate immune response	21029	13129	GO:0006955|GO:0098542	2	3.68271	0.0168161
query_1	TRUE	0.000207927	337	68	10	0.147059	0.0296736	GO:0042113	GO:BP	B cell activation	21029	11551	GO:0046649	2	3.68209	0.0296736
query_1	TRUE	0.000207927	337	68	10	0.147059	0.0296736	GO:0050863	GO:BP	regulation of T cell activation	21029	15397	GO:0042110|GO:0051249	2	3.68209	0.0296736
query_1	TRUE	0.000216757	255	68	9	0.132353	0.0352941	GO:0050730	GO:BP	regulation of peptidyl-tyrosine phosphorylation	21029	15296	GO:0001932|GO:0018108	2	3.66403	0.0352941
query_1	TRUE	0.000228522	2929	68	27	0.397059	0.00921816	GO:0009966	GO:BP	regulation of signal transduction	21029	4268	GO:0007165|GO:0010646|GO:0023051|GO:0048583	2	3.64107	0.00921816
query_1	TRUE	0.000240236	1648	68	20	0.294118	0.0121359	GO:0042127	GO:BP	regulation of cell population proliferation	21029	11561	GO:0008283|GO:0050794	2	3.61936	0.0121359
query_1	TRUE	0.000301104	77	68	6	0.0882353	0.0779221	GO:0043299	GO:BP	leukocyte degranulation	21029	12240	GO:0002252|GO:0045055|GO:0051649	2	3.52128	0.0779221
query_1	TRUE	0.000391202	1076	68	16	0.235294	0.0148699	GO:0001932	GO:BP	regulation of protein phosphorylation	21029	662	GO:0006468|GO:0031399|GO:0042325	2	3.4076	0.0148699
query_1	TRUE	0.000396721	3008	68	27	0.397059	0.00897606	GO:0070887	GO:BP	cellular response to chemical stimulus	21029	19132	GO:0042221|GO:0051716	2	3.40152	0.00897606
query_1	TRUE	0.000412231	2421	68	24	0.352941	0.00991326	GO:0050793	GO:BP	regulation of developmental process	21029	15339	GO:0032502|GO:0050789	2	3.38486	0.00991326
query_1	TRUE	0.000423978	364	68	10	0.147059	0.0274725	GO:0051251	GO:BP	positive regulation of lymphocyte activation	21029	15721	GO:0002696|GO:0046649|GO:0051249	2	3.37266	0.0274725
query_1	TRUE	0.000435279	1544	68	19	0.279412	0.0123057	GO:0006468	GO:BP	protein phosphorylation	21029	2448	GO:0006464|GO:0016310	2	3.36123	0.0123057
query_1	TRUE	0.000442071	2623	68	25	0.367647	0.00953107	GO:0051239	GO:BP	regulation of multicellular organismal process	21029	15712	GO:0032501|GO:0050789	2	3.35451	0.00953107
query_1	TRUE	0.000457781	6094	68	40	0.588235	0.00656383	GO:0048518	GO:BP	positive regulation of biological process	21029	14854	GO:0008150|GO:0050789	2	3.33934	0.00656383
query_1	TRUE	0.000492764	370	68	10	0.147059	0.027027	GO:1903706	GO:BP	regulation of hemopoiesis	21029	26759	GO:0002682|GO:0030097|GO:2000026	2	3.30736	0.027027
query_1	TRUE	0.000517776	372	68	10	0.147059	0.0268817	GO:0018108	GO:BP	peptidyl-tyrosine phosphorylation	21029	6007	GO:0006468|GO:0018212	2	3.28586	0.0268817
query_1	TRUE	0.000538746	284	68	9	0.132353	0.0316901	GO:0022409	GO:BP	positive regulation of cell-cell adhesion	21029	7590	GO:0022407|GO:0045785|GO:0098609	2	3.26862	0.0316901
query_1	TRUE	0.000557385	375	68	10	0.147059	0.0266667	GO:0018212	GO:BP	peptidyl-tyrosine modification	21029	6098	GO:0018193	2	3.25384	0.0266667
query_1	TRUE	0.000624722	837	68	14	0.205882	0.0167264	GO:0045597	GO:BP	positive regulation of cell differentiation	21029	13341	GO:0030154|GO:0045595|GO:0048522|GO:0051094	2	3.20431	0.0167264
query_1	TRUE	0.000681669	1271	68	17	0.25	0.0133753	GO:0051094	GO:BP	positive regulation of developmental process	21029	15586	GO:0032502|GO:0048518|GO:0050793	2	3.16643	0.0133753
query_1	TRUE	0.000747809	3313	68	28	0.411765	0.00845155	GO:0010646	GO:BP	regulation of cell communication	21029	4793	GO:0007154|GO:0050794	2	3.12621	0.00845155
query_1	TRUE	0.000776394	2701	68	25	0.367647	0.00925583	GO:0032879	GO:BP	regulation of localization	21029	9091	GO:0050789|GO:0051179	2	3.10992	0.00925583
query_1	TRUE	0.000778048	2314	68	23	0.338235	0.0099395	GO:0050790	GO:BP	regulation of catalytic activity	21029	15337	GO:0065009	2	3.10899	0.0099395
query_1	TRUE	0.000799355	147	68	7	0.102941	0.047619	GO:0032675	GO:BP	regulation of interleukin-6 production	21029	8930	GO:0001817|GO:0032635	2	3.09726	0.047619
query_1	TRUE	0.000799355	147	68	7	0.102941	0.047619	GO:0032635	GO:BP	interleukin-6 production	21029	8890	GO:0001816	2	3.09726	0.047619
query_1	TRUE	0.000817055	3327	68	28	0.411765	0.00841599	GO:0023051	GO:BP	regulation of signaling	21029	7653	GO:0023052|GO:0050789	2	3.08775	0.00841599
query_1	TRUE	0.000847104	218	68	8	0.117647	0.0366972	GO:0050870	GO:BP	positive regulation of T cell activation	21029	15404	GO:0042110|GO:0050863|GO:0051251|GO:1903039	2	3.07206	0.0366972
query_1	TRUE	0.000895893	1454	68	18	0.264706	0.0123796	GO:0016477	GO:BP	cell migration	21029	5822	GO:0048870	2	3.04774	0.0123796
query_1	TRUE	0.000899209	733	68	13	0.191176	0.0177353	GO:0030155	GO:BP	regulation of cell adhesion	21029	7723	GO:0007155|GO:0050794	2	3.04614	0.0177353
query_1	TRUE	0.000958591	151	68	7	0.102941	0.0463576	GO:0070665	GO:BP	positive regulation of leukocyte proliferation	21029	19014	GO:0008284|GO:0070661|GO:0070663	2	3.01837	0.0463576
query_1	TRUE	0.000960363	50	68	5	0.0735294	0.1	GO:0043300	GO:BP	regulation of leukocyte degranulation	21029	12241	GO:0002697|GO:0043299|GO:1903305	2	3.01756	0.1
query_1	TRUE	0.000990532	94	68	6	0.0882353	0.0638298	GO:0032642	GO:BP	regulation of chemokine production	21029	8897	GO:0001817|GO:0032602	2	3.00413	0.0638298
query_1	TRUE	0.000990532	94	68	6	0.0882353	0.0638298	GO:0032602	GO:BP	chemokine production	21029	8857	GO:0001816	2	3.00413	0.0638298
query_1	TRUE	0.00112148	310	68	9	0.132353	0.0290323	GO:0060326	GO:BP	cell chemotaxis	21029	17116	GO:0006935|GO:0016477|GO:0070887	2	2.95021	0.0290323
query_1	TRUE	0.00115028	227	68	8	0.117647	0.0352423	GO:0097529	GO:BP	myeloid leukocyte migration	21029	21890	GO:0050900	2	2.93919	0.0352423
query_1	TRUE	0.00126877	888	68	14	0.205882	0.0157658	GO:0098609	GO:BP	cell-cell adhesion	21029	22021	GO:0007155	2	2.89662	0.0157658
query_1	TRUE	0.00130143	158	68	7	0.102941	0.0443038	GO:1902107	GO:BP	positive regulation of leukocyte differentiation	21029	25360	GO:0002521|GO:0045597|GO:1902105|GO:1903708	2	2.88558	0.0443038
query_1	TRUE	0.00130143	158	68	7	0.102941	0.0443038	GO:1903708	GO:BP	positive regulation of hemopoiesis	21029	26761	GO:0002684|GO:0030097|GO:0051094|GO:0051240|GO:1903706	2	2.88558	0.0443038
query_1	TRUE	0.00130143	158	68	7	0.102941	0.0443038	GO:0051250	GO:BP	negative regulation of lymphocyte activation	21029	15720	GO:0002695|GO:0046649|GO:0051249	2	2.88558	0.0443038
query_1	TRUE	0.00131226	231	68	8	0.117647	0.034632	GO:0031348	GO:BP	negative regulation of defense response	21029	8288	GO:0006952|GO:0031347|GO:0048585	2	2.88198	0.034632
query_1	TRUE	0.00141642	160	68	7	0.102941	0.04375	GO:0032640	GO:BP	tumor necrosis factor production	21029	8895	GO:0071706	2	2.84881	0.04375
query_1	TRUE	0.00141642	160	68	7	0.102941	0.04375	GO:0032680	GO:BP	regulation of tumor necrosis factor production	21029	8935	GO:0032640|GO:1903555	2	2.84881	0.04375
query_1	TRUE	0.0015779	3009	68	26	0.382353	0.00864074	GO:0010033	GO:BP	response to organic substance	21029	4309	GO:0042221	2	2.80192	0.00864074
query_1	TRUE	0.00170034	103	68	6	0.0882353	0.0582524	GO:1903557	GO:BP	positive regulation of tumor necrosis factor superfamily cytokine production	21029	26614	GO:0001819|GO:0071706|GO:1903555	2	2.76947	0.0582524
query_1	TRUE	0.00174937	240	68	8	0.117647	0.0333333	GO:0045055	GO:BP	regulated exocytosis	21029	13112	GO:0006887	2	2.75712	0.0333333
query_1	TRUE	0.00186904	7	68	3	0.0441176	0.428571	GO:0045588	GO:BP	positive regulation of gamma-delta T cell differentiation	21029	13332	GO:0042492|GO:0045582|GO:0045586|GO:0046645	2	2.72838	0.428571
query_1	TRUE	0.00205906	925	68	14	0.205882	0.0151351	GO:0008284	GO:BP	positive regulation of cell population proliferation	21029	3570	GO:0008283|GO:0042127|GO:0048522	2	2.68633	0.0151351
query_1	TRUE	0.00211226	927	68	14	0.205882	0.0151025	GO:0032101	GO:BP	regulation of response to external stimulus	21029	8548	GO:0009605|GO:0048583	2	2.67525	0.0151025
query_1	TRUE	0.00215314	1223	68	16	0.235294	0.0130826	GO:0042325	GO:BP	regulation of phosphorylation	21029	11680	GO:0016310|GO:0019220	2	2.66693	0.0130826
query_1	TRUE	0.00221881	59	68	5	0.0735294	0.0847458	GO:0002886	GO:BP	regulation of myeloid leukocyte mediated immunity	21029	1520	GO:0002444|GO:0002703	2	2.65388	0.0847458
query_1	TRUE	0.00224698	108	68	6	0.0882353	0.0555556	GO:0045621	GO:BP	positive regulation of lymphocyte differentiation	21029	13365	GO:0030098|GO:0045619|GO:0051251|GO:1902107	2	2.6484	0.0555556
query_1	TRUE	0.00233249	439	68	10	0.147059	0.022779	GO:0022407	GO:BP	regulation of cell-cell adhesion	21029	7588	GO:0030155|GO:0098609	2	2.63218	0.022779
query_1	TRUE	0.0027649	27	68	4	0.0588235	0.148148	GO:0002433	GO:BP	immune response-regulating cell surface receptor signaling pathway involved in phagocytosis	21029	1079	GO:0002252|GO:0002768|GO:0006909	2	2.55832	0.148148
query_1	TRUE	0.0027649	27	68	4	0.0588235	0.148148	GO:0038096	GO:BP	Fc-gamma receptor signaling pathway involved in phagocytosis	21029	11192	GO:0002431|GO:0002433|GO:0038094	2	2.55832	0.148148
query_1	TRUE	0.00285155	1575	68	18	0.264706	0.0114286	GO:0010941	GO:BP	regulation of cell death	21029	5064	GO:0008219|GO:0050794	2	2.54492	0.0114286
query_1	TRUE	0.00292954	113	68	6	0.0882353	0.0530973	GO:0002698	GO:BP	negative regulation of immune effector process	21029	1339	GO:0002252|GO:0002683|GO:0002697	2	2.5332	0.0530973
query_1	TRUE	0.00298354	8	68	3	0.0441176	0.375	GO:0046645	GO:BP	positive regulation of gamma-delta T cell activation	21029	14275	GO:0046629|GO:0046643|GO:0050870	2	2.52527	0.375
query_1	TRUE	0.00308422	63	68	5	0.0735294	0.0793651	GO:0032663	GO:BP	regulation of interleukin-2 production	21029	8918	GO:0001817|GO:0032623	2	2.51086	0.0793651
query_1	TRUE	0.00308422	63	68	5	0.0735294	0.0793651	GO:0032623	GO:BP	interleukin-2 production	21029	8878	GO:0001816	2	2.51086	0.0793651
query_1	TRUE	0.00347911	183	68	7	0.102941	0.0382514	GO:0002819	GO:BP	regulation of adaptive immune response	21029	1453	GO:0002250|GO:0050776	2	2.45853	0.0382514
query_1	TRUE	0.00360634	65	68	5	0.0735294	0.0769231	GO:0030888	GO:BP	regulation of B cell proliferation	21029	8049	GO:0042100|GO:0050670|GO:0050864	2	2.44293	0.0769231
query_1	TRUE	0.00360634	65	68	5	0.0735294	0.0769231	GO:0046635	GO:BP	positive regulation of alpha-beta T cell activation	21029	14265	GO:0046631|GO:0046634|GO:0050870	2	2.44293	0.0769231
query_1	TRUE	0.00360634	65	68	5	0.0735294	0.0769231	GO:0002704	GO:BP	negative regulation of leukocyte mediated immunity	21029	1345	GO:0002443|GO:0002698|GO:0002703	2	2.44293	0.0769231
query_1	TRUE	0.00386742	976	68	14	0.205882	0.0143443	GO:0051336	GO:BP	regulation of hydrolase activity	21029	15791	GO:0050790	2	2.41258	0.0143443
query_1	TRUE	0.0039049	465	68	10	0.147059	0.0215054	GO:0001819	GO:BP	positive regulation of cytokine production	21029	588	GO:0001816|GO:0001817|GO:0010628|GO:0051240	2	2.40839	0.0215054
query_1	TRUE	0.00446493	9	68	3	0.0441176	0.333333	GO:0002576	GO:BP	platelet degranulation	21029	1220	GO:0045055|GO:0051649	2	2.35019	0.333333
query_1	TRUE	0.00446493	9	68	3	0.0441176	0.333333	GO:0045586	GO:BP	regulation of gamma-delta T cell differentiation	21029	13330	GO:0042492|GO:0045580|GO:0046643	2	2.35019	0.333333
query_1	TRUE	0.00474417	717	68	12	0.176471	0.0167364	GO:0001934	GO:BP	positive regulation of protein phosphorylation	21029	664	GO:0001932|GO:0006468|GO:0031401|GO:0042327	2	2.32384	0.0167364
query_1	TRUE	0.0048276	275	68	8	0.117647	0.0290909	GO:0001818	GO:BP	negative regulation of cytokine production	21029	587	GO:0001816|GO:0001817|GO:0010629|GO:0051241	2	2.31627	0.0290909
query_1	TRUE	0.00490908	31	68	4	0.0588235	0.129032	GO:0038094	GO:BP	Fc-gamma receptor signaling pathway	21029	11190	GO:0038093	2	2.309	0.129032
query_1	TRUE	0.00521877	70	68	5	0.0735294	0.0714286	GO:0032722	GO:BP	positive regulation of chemokine production	21029	8977	GO:0001819|GO:0032602|GO:0032642	2	2.28243	0.0714286
query_1	TRUE	0.00529546	1645	68	18	0.264706	0.0109422	GO:0048870	GO:BP	cell motility	21029	15173	GO:0006928|GO:0040011|GO:0051674	2	2.2761	0.0109422
query_1	TRUE	0.00529546	1645	68	18	0.264706	0.0109422	GO:0051674	GO:BP	localization of cell	21029	16045	GO:0009987|GO:0051179	2	2.2761	0.0109422
query_1	TRUE	0.00534576	2385	68	22	0.323529	0.00922432	GO:0071310	GO:BP	cellular response to organic substance	21029	19359	GO:0010033|GO:0070887	2	2.27199	0.00922432
query_1	TRUE	0.00552896	1315	68	16	0.235294	0.0121673	GO:2000026	GO:BP	regulation of multicellular organismal development	21029	29257	GO:0007275|GO:0050793|GO:0051239	2	2.25736	0.0121673
query_1	TRUE	0.00559674	32	68	4	0.0588235	0.125	GO:0002862	GO:BP	negative regulation of inflammatory response to antigenic stimulus	21029	1496	GO:0002437|GO:0002861|GO:0050728|GO:0050777	2	2.25206	0.125
query_1	TRUE	0.00586504	198	68	7	0.102941	0.0353535	GO:0050864	GO:BP	regulation of B cell activation	21029	15398	GO:0042113|GO:0051249	2	2.23173	0.0353535
query_1	TRUE	0.00605472	128	68	6	0.0882353	0.046875	GO:0050853	GO:BP	B cell receptor signaling pathway	21029	15387	GO:0050851	2	2.21791	0.046875
query_1	TRUE	0.00612479	284	68	8	0.117647	0.028169	GO:1902105	GO:BP	regulation of leukocyte differentiation	21029	25358	GO:0002521|GO:0045595|GO:1903706	2	2.21291	0.028169
query_1	TRUE	0.00620457	1841	68	19	0.279412	0.0103205	GO:0016310	GO:BP	phosphorylation	21029	5782	GO:0006796	2	2.20729	0.0103205
query_1	TRUE	0.0063637	10	68	3	0.0441176	0.3	GO:0046643	GO:BP	regulation of gamma-delta T cell activation	21029	14273	GO:0046629|GO:0050863	2	2.19629	0.3
query_1	TRUE	0.00666583	385	68	9	0.132353	0.0233766	GO:0032102	GO:BP	negative regulation of response to external stimulus	21029	8549	GO:0009605|GO:0032101|GO:0048585	2	2.17615	0.0233766
query_1	TRUE	0.00692908	11067	68	54	0.794118	0.00487937	GO:0050794	GO:BP	regulation of cellular process	21029	15340	GO:0009987|GO:0050789	2	2.15932	0.00487937
query_1	TRUE	0.00718282	34	68	4	0.0588235	0.117647	GO:0002431	GO:BP	Fc receptor mediated stimulatory signaling pathway	21029	1077	GO:0002429	2	2.14371	0.117647
query_1	TRUE	0.00737516	205	68	7	0.102941	0.0341463	GO:0045637	GO:BP	regulation of myeloid cell differentiation	21029	13381	GO:0030099|GO:0045595|GO:1903706	2	2.13223	0.0341463
query_1	TRUE	0.00740106	390	68	9	0.132353	0.0230769	GO:0030098	GO:BP	lymphocyte differentiation	21029	7707	GO:0046649|GO:1903131	2	2.13071	0.0230769
query_1	TRUE	0.00786173	207	68	7	0.102941	0.0338164	GO:0071222	GO:BP	cellular response to lipopolysaccharide	21029	19275	GO:0032496|GO:0071219|GO:0071396|GO:1901701	2	2.10448	0.0338164
query_1	TRUE	0.00793527	2057	68	20	0.294118	0.0097229	GO:0008219	GO:BP	cell death	21029	3562	GO:0009987	2	2.10044	0.0097229
query_1	TRUE	0.00908757	1367	68	16	0.235294	0.0117045	GO:0019220	GO:BP	regulation of phosphate metabolic process	21029	6478	GO:0006796|GO:0051174	2	2.04155	0.0117045
query_1	TRUE	0.00920299	634	68	11	0.161765	0.0173502	GO:0045859	GO:BP	regulation of protein kinase activity	21029	13587	GO:0001932|GO:0043549	2	2.03607	0.0173502
query_1	TRUE	0.00925844	1369	68	16	0.235294	0.0116874	GO:0051174	GO:BP	regulation of phosphorus metabolic process	21029	15658	GO:0006793|GO:0031323	2	2.03346	0.0116874
query_1	TRUE	0.00982519	1719	68	18	0.264706	0.0104712	GO:0051049	GO:BP	regulation of transport	21029	15555	GO:0006810|GO:0032879	2	2.00766	0.0104712
query_1	TRUE	0.0103954	216	68	7	0.102941	0.0324074	GO:0071219	GO:BP	cellular response to molecule of bacterial origin	21029	19272	GO:0002237|GO:0071216	2	1.98316	0.0324074
query_1	TRUE	0.0110712	3780	68	28	0.411765	0.00740741	GO:0006950	GO:BP	response to stress	21029	2886	GO:0050896	2	1.95581	0.00740741
query_1	TRUE	0.0113786	309	68	8	0.117647	0.02589	GO:0051056	GO:BP	regulation of small GTPase mediated signal transduction	21029	15562	GO:0007264|GO:1902531	2	1.94391	0.02589
query_1	TRUE	0.0118049	784	68	12	0.176471	0.0153061	GO:0032940	GO:BP	secretion by cell	21029	9142	GO:0046903|GO:0140352	2	1.92794	0.0153061
query_1	TRUE	0.0134478	147	68	6	0.0882353	0.0408163	GO:0030183	GO:BP	B cell differentiation	21029	7737	GO:0030098|GO:0042113	2	1.87135	0.0408163
query_1	TRUE	0.0139495	40	68	4	0.0588235	0.1	GO:2000249	GO:BP	regulation of actin cytoskeleton reorganization	21029	29477	GO:0031532|GO:0032956	2	1.85544	0.1
query_1	TRUE	0.0142935	799	68	12	0.176471	0.0150188	GO:0042327	GO:BP	positive regulation of phosphorylation	21029	11682	GO:0016310|GO:0042325|GO:0045937	2	1.84486	0.0150188
query_1	TRUE	0.0144294	86	68	5	0.0735294	0.0581395	GO:0050672	GO:BP	negative regulation of lymphocyte proliferation	21029	15272	GO:0032945|GO:0046651|GO:0050670|GO:0051250	2	1.84075	0.0581395
query_1	TRUE	0.0150617	13	68	3	0.0441176	0.230769	GO:0042492	GO:BP	gamma-delta T cell differentiation	21029	11812	GO:0030217|GO:0046629	2	1.82213	0.230769
query_1	TRUE	0.0152711	87	68	5	0.0735294	0.0574713	GO:0032945	GO:BP	negative regulation of mononuclear cell proliferation	21029	9146	GO:0032943|GO:0032944|GO:0070664	2	1.81613	0.0574713
query_1	TRUE	0.0156828	151	68	6	0.0882353	0.0397351	GO:0050728	GO:BP	negative regulation of inflammatory response	21029	15294	GO:0006954|GO:0031348|GO:0032102|GO:0050727	2	1.80458	0.0397351
query_1	TRUE	0.0169209	4818	68	32	0.470588	0.00664176	GO:0048523	GO:BP	negative regulation of cellular process	21029	14859	GO:0009987|GO:0048519|GO:0050794	2	1.77158	0.00664176
query_1	TRUE	0.0170018	42	68	4	0.0588235	0.0952381	GO:0032735	GO:BP	positive regulation of interleukin-12 production	21029	8990	GO:0001819|GO:0032615|GO:0032655	2	1.7695	0.0952381
query_1	TRUE	0.0175675	328	68	8	0.117647	0.0243902	GO:0032496	GO:BP	response to lipopolysaccharide	21029	8809	GO:0002237|GO:0033993|GO:1901700	2	1.75529	0.0243902
query_1	TRUE	0.0179533	553	68	10	0.147059	0.0180832	GO:0051347	GO:BP	positive regulation of transferase activity	21029	15802	GO:0043085|GO:0051338	2	1.74586	0.0180832
query_1	TRUE	0.0180155	235	68	7	0.102941	0.0297872	GO:0002699	GO:BP	positive regulation of immune effector process	21029	1340	GO:0002252|GO:0002684|GO:0002697	2	1.74435	0.0297872
query_1	TRUE	0.0191113	557	68	10	0.147059	0.0179533	GO:0051345	GO:BP	positive regulation of hydrolase activity	21029	15800	GO:0043085|GO:0051336	2	1.71871	0.0179533
query_1	TRUE	0.019125	14	68	3	0.0441176	0.214286	GO:0071639	GO:BP	positive regulation of monocyte chemotactic protein-1 production	21029	19645	GO:0032722|GO:0071605|GO:0071637	2	1.7184	0.214286
query_1	TRUE	0.0197199	971	68	13	0.191176	0.0133883	GO:1902533	GO:BP	positive regulation of intracellular signal transduction	21029	25716	GO:0009967|GO:0035556|GO:1902531	2	1.70509	0.0133883
query_1	TRUE	0.0205201	44	68	4	0.0588235	0.0909091	GO:0002758	GO:BP	innate immune response-activating signal transduction	21029	1393	GO:0002218|GO:0002757	2	1.68782	0.0909091
query_1	TRUE	0.0211605	93	68	5	0.0735294	0.0537634	GO:0070664	GO:BP	negative regulation of leukocyte proliferation	21029	19013	GO:0008285|GO:0070661|GO:0070663	2	1.67447	0.0537634
query_1	TRUE	0.0217897	1821	68	18	0.264706	0.00988468	GO:0040011	GO:BP	locomotion	21029	11470	GO:0008150	2	1.66175	0.00988468
query_1	TRUE	0.0222936	94	68	5	0.0735294	0.0531915	GO:0031341	GO:BP	regulation of cell killing	21029	8281	GO:0001906|GO:0050794	2	1.65182	0.0531915
query_1	TRUE	0.0222936	94	68	5	0.0735294	0.0531915	GO:0045582	GO:BP	positive regulation of T cell differentiation	21029	13326	GO:0030217|GO:0045580|GO:0045621|GO:0050870	2	1.65182	0.0531915
query_1	TRUE	0.0224673	45	68	4	0.0588235	0.0888889	GO:0001774	GO:BP	microglial cell activation	21029	551	GO:0042116	2	1.64845	0.0888889
query_1	TRUE	0.0234736	95	68	5	0.0735294	0.0526316	GO:0002275	GO:BP	myeloid cell activation involved in immune response	21029	930	GO:0002274|GO:0002366	2	1.62942	0.0526316
query_1	TRUE	0.0235982	840	68	12	0.176471	0.0142857	GO:0140352	GO:BP	export from cell	21029	23090	GO:0006810|GO:0009987	2	1.62712	0.0142857
query_1	TRUE	0.0238509	15	68	3	0.0441176	0.2	GO:0045579	GO:BP	positive regulation of B cell differentiation	21029	13323	GO:0030183|GO:0045577|GO:0045621|GO:0050871	2	1.6225	0.2
query_1	TRUE	0.0240999	1477	68	16	0.235294	0.0108328	GO:0031399	GO:BP	regulation of protein modification process	21029	8306	GO:0006464|GO:0032268	2	1.61798	0.0108328
query_1	TRUE	0.0245473	46	68	4	0.0588235	0.0869565	GO:0031295	GO:BP	T cell costimulation	21029	8257	GO:0031294|GO:0050870	2	1.61	0.0869565
query_1	TRUE	0.0245473	46	68	4	0.0588235	0.0869565	GO:0002861	GO:BP	regulation of inflammatory response to antigenic stimulus	21029	1495	GO:0002437|GO:0050727|GO:0050776	2	1.61	0.0869565
query_1	TRUE	0.0247878	344	68	8	0.117647	0.0232558	GO:0002460	GO:BP	adaptive immune response based on somatic recombination of immune receptors built from immunoglobulin superfamily domains	21029	1106	GO:0002250	2	1.60576	0.0232558
query_1	TRUE	0.0258299	996	68	13	0.191176	0.0130522	GO:0051241	GO:BP	negative regulation of multicellular organismal process	21029	15714	GO:0032501|GO:0048519|GO:0051239	2	1.58788	0.0130522
query_1	TRUE	0.0263875	347	68	8	0.117647	0.0230548	GO:0002237	GO:BP	response to molecule of bacterial origin	21029	893	GO:0009617|GO:0010033|GO:0043207	2	1.5786	0.0230548
query_1	TRUE	0.0267656	47	68	4	0.0588235	0.0851064	GO:0032715	GO:BP	negative regulation of interleukin-6 production	21029	8970	GO:0001818|GO:0032635|GO:0032675	2	1.57242	0.0851064
query_1	TRUE	0.0286888	99	68	5	0.0735294	0.0505051	GO:0032760	GO:BP	positive regulation of tumor necrosis factor production	21029	9015	GO:0032640|GO:0032680|GO:1903557	2	1.54229	0.0505051
query_1	TRUE	0.0287898	168	68	6	0.0882353	0.0357143	GO:0002822	GO:BP	regulation of adaptive immune response based on somatic recombination of immune receptors built from immunoglobulin superfamily domains	21029	1456	GO:0002460|GO:0002819	2	1.54076	0.0357143
query_1	TRUE	0.0291279	48	68	4	0.0588235	0.0833333	GO:0031294	GO:BP	lymphocyte costimulation	21029	8256	GO:0002376|GO:0051251	2	1.53569	0.0833333
query_1	TRUE	0.0301236	100	68	5	0.0735294	0.05	GO:0042102	GO:BP	positive regulation of T cell proliferation	21029	11547	GO:0042098|GO:0042129|GO:0050671|GO:0050870	2	1.52109	0.05
query_1	TRUE	0.0316136	101	68	5	0.0735294	0.049505	GO:0042100	GO:BP	B cell proliferation	21029	11546	GO:0042113|GO:0046651	2	1.50013	0.049505
query_1	TRUE	0.0316136	101	68	5	0.0735294	0.049505	GO:0046634	GO:BP	regulation of alpha-beta T cell activation	21029	14264	GO:0046631|GO:0050863	2	1.50013	0.049505
query_1	TRUE	0.0316401	49	68	4	0.0588235	0.0816327	GO:0046638	GO:BP	positive regulation of alpha-beta T cell differentiation	21029	14268	GO:0045582|GO:0046632|GO:0046635|GO:0046637	2	1.49976	0.0816327
query_1	TRUE	0.0334467	471	68	9	0.132353	0.0191083	GO:0033674	GO:BP	positive regulation of kinase activity	21029	9612	GO:0042327|GO:0043549|GO:0051347	2	1.47565	0.0191083
query_1	TRUE	0.0343625	360	68	8	0.117647	0.0222222	GO:0006887	GO:BP	exocytosis	21029	2832	GO:0016192|GO:0032940	2	1.46392	0.0222222
query_1	TRUE	0.036182	877	68	12	0.176471	0.013683	GO:0045937	GO:BP	positive regulation of phosphate metabolic process	21029	13659	GO:0006796|GO:0010562|GO:0019220	2	1.44151	0.013683
query_1	TRUE	0.036182	877	68	12	0.176471	0.013683	GO:0010562	GO:BP	positive regulation of phosphorus metabolic process	21029	4715	GO:0006793|GO:0031325|GO:0051174	2	1.44151	0.013683
query_1	TRUE	0.0364305	104	68	5	0.0735294	0.0480769	GO:0002444	GO:BP	myeloid leukocyte mediated immunity	21029	1090	GO:0002443	2	1.43853	0.0480769
query_1	TRUE	0.0389185	605	68	10	0.147059	0.0165289	GO:0051046	GO:BP	regulation of secretion	21029	15552	GO:0046903|GO:0051049	2	1.40984	0.0165289
query_1	TRUE	0.0394711	606	68	10	0.147059	0.0165017	GO:0031347	GO:BP	regulation of defense response	21029	8287	GO:0006952|GO:0080134	2	1.40372	0.0165017
query_1	TRUE	0.0407312	1541	68	16	0.235294	0.0103829	GO:0045595	GO:BP	regulation of cell differentiation	21029	13339	GO:0030154|GO:0050793|GO:0050794	2	1.39007	0.0103829
query_1	TRUE	0.0410237	744	68	11	0.161765	0.0147849	GO:0009617	GO:BP	response to bacterium	21029	3990	GO:0051707	2	1.38696	0.0147849
query_1	TRUE	0.0424779	18	68	3	0.0441176	0.166667	GO:0032930	GO:BP	positive regulation of superoxide anion generation	21029	9137	GO:0032928|GO:0042554|GO:2000379	2	1.37184	0.166667
query_1	TRUE	0.0424779	18	68	3	0.0441176	0.166667	GO:0046629	GO:BP	gamma-delta T cell activation	21029	14259	GO:0042110	2	1.37184	0.166667
query_1	TRUE	0.0437082	894	68	12	0.176471	0.0134228	GO:0030334	GO:BP	regulation of cell migration	21029	7819	GO:0016477|GO:2000145	2	1.35944	0.0134228
query_1	TRUE	0.04372	108	68	5	0.0735294	0.0462963	GO:0031532	GO:BP	actin cytoskeleton reorganization	21029	8354	GO:0030036	2	1.35932	0.0462963
query_1	TRUE	0.0452559	752	68	11	0.161765	0.0146277	GO:0043549	GO:BP	regulation of kinase activity	21029	12408	GO:0042325|GO:0051338	2	1.34433	0.0146277
query_1	TRUE	0.0464623	5561	68	34	0.5	0.00611401	GO:0048522	GO:BP	positive regulation of cellular process	21029	14858	GO:0009987|GO:0048518|GO:0050794	2	1.3329	0.00611401
query_1	TRUE	0.0481048	184	68	6	0.0882353	0.0326087	GO:0045619	GO:BP	regulation of lymphocyte differentiation	21029	13363	GO:0030098|GO:0051249|GO:1902105	2	1.31781	0.0326087
query_1	TRUE	0.0481855	4316	68	29	0.426471	0.00671918	GO:0042221	GO:BP	response to chemical	21029	11633	GO:0050896	2	1.31708	0.00671918
query_1	TRUE	1.32434e-09	5694	70	46	0.657143	0.00807868	GO:0005886	GO:CC	plasma membrane	21672	514	GO:0016020|GO:0071944	2	8.878	0.00807868
query_1	TRUE	4.59817e-09	309	70	13	0.185714	0.0420712	GO:0030667	GO:CC	secretory granule membrane	21672	1124	GO:0030141|GO:0030659|GO:0098588	2	8.33741	0.0420712
query_1	TRUE	2.83984e-08	625	70	16	0.228571	0.0256	GO:0098552	GO:CC	side of membrane	21672	3547	GO:0016020|GO:0110165	2	7.54671	0.0256
query_1	TRUE	2.85881e-08	6181	70	46	0.657143	0.00744216	GO:0071944	GO:CC	cell periphery	21672	3128	GO:0110165	2	7.54382	0.00744216
query_1	TRUE	8.12279e-07	908	70	17	0.242857	0.0187225	GO:0009986	GO:CC	cell surface	21672	790	GO:0110165	2	6.09029	0.0187225
query_1	TRUE	8.62081e-07	72	70	7	0.1	0.0972222	GO:0070821	GO:CC	tertiary granule membrane	21672	2892	GO:0030667|GO:0070820	2	6.06445	0.0972222
query_1	TRUE	3.22058e-06	9818	70	55	0.785714	0.00560196	GO:0016020	GO:CC	membrane	21672	849	GO:0110165	2	5.49207	0.00560196
query_1	TRUE	4.17636e-06	90	70	7	0.1	0.0777778	GO:0035579	GO:CC	specific granule membrane	21672	1860	GO:0030667|GO:0042581	2	5.3792	0.0777778
query_1	TRUE	1.40424e-05	163	70	8	0.114286	0.0490798	GO:0070820	GO:CC	tertiary granule	21672	2891	GO:0030141	2	4.85256	0.0490798
query_1	TRUE	2.18018e-05	514	70	12	0.171429	0.0233463	GO:0043235	GO:CC	receptor complex	21672	2131	GO:0032991	2	4.66151	0.0233463
query_1	TRUE	2.18533e-05	414	70	11	0.157143	0.02657	GO:0009897	GO:CC	external side of plasma membrane	21672	783	GO:0005886|GO:0009986|GO:0098552	2	4.66048	0.02657
query_1	TRUE	3.22114e-05	1630	70	20	0.285714	0.0122699	GO:0005887	GO:CC	integral component of plasma membrane	21672	515	GO:0016021|GO:0031226	2	4.49199	0.0122699
query_1	TRUE	3.37493e-05	1171	70	17	0.242857	0.0145175	GO:0030659	GO:CC	cytoplasmic vesicle membrane	21672	1117	GO:0012506|GO:0031410	2	4.47173	0.0145175
query_1	TRUE	4.24621e-05	1190	70	17	0.242857	0.0142857	GO:0012506	GO:CC	vesicle membrane	21672	817	GO:0031090|GO:0031982	2	4.372	0.0142857
query_1	TRUE	7.1985e-05	1713	70	20	0.285714	0.0116754	GO:0031226	GO:CC	intrinsic component of plasma membrane	21672	1237	GO:0005886|GO:0031224	2	4.14276	0.0116754
query_1	TRUE	0.000135329	860	70	14	0.2	0.0162791	GO:0030141	GO:CC	secretory granule	21672	1079	GO:0012505|GO:0099503	2	3.86861	0.0162791
query_1	TRUE	0.000200358	158	70	7	0.1	0.0443038	GO:0042581	GO:CC	specific granule	21672	2037	GO:0030141	2	3.69819	0.0443038
query_1	TRUE	0.000291035	330	70	9	0.128571	0.0272727	GO:0045121	GO:CC	membrane raft	21672	2433	GO:0098857	2	3.53605	0.0272727
query_1	TRUE	0.000298408	331	70	9	0.128571	0.0271903	GO:0098857	GO:CC	membrane microdomain	21672	3654	GO:0016020	2	3.52519	0.0271903
query_1	TRUE	0.000338343	2447	70	23	0.328571	0.00939926	GO:0031410	GO:CC	cytoplasmic vesicle	21672	1320	GO:0005737|GO:0097708	2	3.47064	0.00939926
query_1	TRUE	0.000343206	2449	70	23	0.328571	0.00939159	GO:0097708	GO:CC	intracellular vesicle	21672	3493	GO:0031982|GO:0043231	2	3.46444	0.00939159
query_1	TRUE	0.00037093	60	70	5	0.0714286	0.0833333	GO:0101003	GO:CC	ficolin-1-rich granule membrane	21672	3797	GO:0030667|GO:0070820|GO:0101002	2	3.43071	0.0833333
query_1	TRUE	0.00106622	1025	70	14	0.2	0.0136585	GO:0099503	GO:CC	secretory vesicle	21672	3776	GO:0031410	2	2.97215	0.0136585
query_1	TRUE	0.00204886	2124	70	20	0.285714	0.0094162	GO:0098588	GO:CC	bounding membrane of organelle	21672	3578	GO:0031090	2	2.68849	0.0094162
query_1	TRUE	0.00263697	2	70	2	0.0285714	1	GO:0034689	GO:CC	integrin alphaX-beta2 complex	21672	1763	GO:0008305	2	2.5789	1
query_1	TRUE	0.00473258	170	70	6	0.0857143	0.0352941	GO:0009898	GO:CC	cytoplasmic side of plasma membrane	21672	784	GO:0005886|GO:0098562	2	2.3249	0.0352941
query_1	TRUE	0.00570647	5741	70	35	0.5	0.0060965	GO:0016021	GO:CC	integral component of membrane	21672	850	GO:0031224	2	2.24363	0.0060965
query_1	TRUE	0.00994721	194	70	6	0.0857143	0.0309278	GO:0098562	GO:CC	cytoplasmic side of membrane	21672	3557	GO:0098552	2	2.0023	0.0309278
query_1	TRUE	0.0105555	5897	70	35	0.5	0.00593522	GO:0031224	GO:CC	intrinsic component of membrane	21672	1235	GO:0016020|GO:0110165	2	1.97652	0.00593522
query_1	TRUE	0.0114065	293	70	7	0.1	0.0238908	GO:0098802	GO:CC	plasma membrane signaling receptor complex	21672	3628	GO:0043235|GO:0098797	2	1.94285	0.0238908
query_1	TRUE	0.0125074	3942	70	27	0.385714	0.00684932	GO:0031982	GO:CC	vesicle	21672	1451	GO:0043227	2	1.90283	0.00684932
query_1	TRUE	0.0202556	12193	70	55	0.785714	0.00451078	GO:0005737	GO:CC	cytoplasm	21672	384	GO:0005622|GO:0110165	2	1.69345	0.00451078
query_1	TRUE	0.0348576	31	70	3	0.0428571	0.0967742	GO:0008305	GO:CC	integrin complex	21672	619	GO:0005887|GO:0098636|GO:0098802	2	1.4577	0.0967742
query_1	TRUE	5.11052e-05	497	69	12	0.173913	0.0241449	GO:0030695	GO:MF	GTPase regulator activity	20166	4926	GO:0060589	2	4.29153	0.0241449
query_1	TRUE	5.11052e-05	497	69	12	0.173913	0.0241449	GO:0060589	GO:MF	nucleoside-triphosphatase regulator activity	20166	9579	GO:0030234	2	4.29153	0.0241449
query_1	TRUE	0.0041343	141	69	6	0.0869565	0.0425532	GO:0019955	GO:MF	cytokine binding	20166	4621	GO:0005515	2	2.3836	0.0425532
query_1	TRUE	0.00626828	1550	69	17	0.246377	0.0109677	GO:0038023	GO:MF	signaling receptor activity	20166	6493	GO:0060089	2	2.20285	0.0109677
query_1	TRUE	0.00626828	1550	69	17	0.246377	0.0109677	GO:0060089	GO:MF	molecular transducer activity	20166	9569	GO:0003674	2	2.20285	0.0109677
query_1	TRUE	0.0210378	277	69	7	0.101449	0.0252708	GO:0005096	GO:MF	GTPase activator activity	20166	1601	GO:0008047|GO:0030695	2	1.677	0.0252708
query_1	TRUE	0.000817337	271	25	10	0.4	0.0369004	HP:0033796	HP	Abnormal leukocyte physiology	4667	13747	HP:0001871|HP:0010978	2	3.0876	0.0369004
query_1	TRUE	0.000817337	271	25	10	0.4	0.0369004	HP:0031409	HP	Abnormal lymphocyte physiology	4667	11428	HP:0011017|HP:0033796	2	3.0876	0.0369004
query_1	TRUE	0.00157602	221	25	9	0.36	0.040724	HP:0002721	HP	Immunodeficiency	4667	1984	HP:0010978	2	2.80244	0.040724
query_1	TRUE	0.00243882	386	25	11	0.44	0.0284974	HP:0011893	HP	Abnormal leukocyte count	4667	8323	HP:0001881	2	2.61282	0.0284974
query_1	TRUE	0.00306931	175	25	8	0.32	0.0457143	HP:0004332	HP	Abnormal lymphocyte morphology	4667	3040	HP:0001881	2	2.51296	0.0457143
query_1	TRUE	0.00765104	50	25	5	0.2	0.1	HP:0010975	HP	Abnormal B cell count	4667	7428	HP:0002846|HP:0040088	2	2.11628	0.1
query_1	TRUE	0.00845224	51	25	5	0.2	0.0980392	HP:0002846	HP	Abnormal B cell morphology	4667	2068	HP:0004332	2	2.07303	0.0980392
query_1	TRUE	0.0107975	547	25	12	0.48	0.0219378	HP:0010987	HP	Abnormal cellular immune system morphology	4667	7439	HP:0032251	2	1.96667	0.0219378
query_1	TRUE	0.0107975	547	25	12	0.48	0.0219378	HP:0001881	HP	Abnormal leukocyte morphology	4667	1370	HP:0001871|HP:0010987	2	1.96667	0.0219378
query_1	TRUE	0.0169623	571	25	12	0.48	0.0210158	HP:0032251	HP	Abnormal immune system morphology	4667	12228	HP:0002715	2	1.77051	0.0210158
query_1	TRUE	0.0173519	156	25	7	0.28	0.0448718	HP:0040088	HP	Abnormal lymphocyte count	4667	14061	HP:0004332|HP:0011893	2	1.76065	0.0448718
query_1	TRUE	0.0364457	244	25	8	0.32	0.0327869	HP:0010701	HP	Abnormal immunoglobulin level	4667	7168	HP:0005368|HP:0005372	2	1.43835	0.0327869
query_1	TRUE	0.0375493	245	25	8	0.32	0.0326531	HP:0005372	HP	Abnormality of B cell physiology	4667	3667	HP:0031409	2	1.4254	0.0326531
query_1	TRUE	0.0488903	1820	25	20	0.8	0.010989	HP:0002715	HP	Abnormality of the immune system	4667	1978	HP:0000118	2	1.31078	0.010989
query_1	TRUE	0.049933	73	25	5	0.2	0.0684932	HP:0002843	HP	Abnormal T cell morphology	4667	2067	HP:0004332	2	1.30161	0.0684932
query_1	TRUE	0.049933	73	25	5	0.2	0.0684932	HP:0011839	HP	Abnormal T cell count	4667	8271	HP:0002843|HP:0040088	2	1.30161	0.0684932
query_1	TRUE	0.000182761	5296	50	41	0.82	0.00774169	HPA:0530711	HPA	spleen; cells in red pulp[â‰¥Low]	10976	751	HPA:0530000	2	3.73812	0.00774169
query_1	TRUE	0.000238274	4174	50	36	0.72	0.00862482	HPA:0600442	HPA	tonsil; non-germinal center cells[â‰¥Medium]	10976	822	HPA:0600441	2	3.62292	0.00862482
query_1	TRUE	0.00040049	130	50	7	0.14	0.0538462	HPA:0090973	HPA	cerebellum; granular cells - cytoplasm/membrane[High]	10976	142	HPA:0090972	2	3.39741	0.0538462
query_1	TRUE	0.000456215	1313	50	19	0.38	0.0144707	HPA:0600443	HPA	tonsil; non-germinal center cells[High]	10976	823	HPA:0600442	2	3.34083	0.0144707
query_1	TRUE	0.00111633	5857	50	42	0.84	0.00717091	HPA:0530000	HPA	spleen	10976	750	HPA:0000000	2	2.95221	0.00717091
query_1	TRUE	0.0026458	1201	50	17	0.34	0.0141549	HPA:0310443	HPA	lymph node; non-germinal center cells[High]	10976	440	HPA:0310442	2	2.57744	0.0141549
query_1	TRUE	0.00357048	181	50	7	0.14	0.038674	HPA:0091003	HPA	cerebellum; molecular layer cells - cytoplasm/membrane[High]	10976	151	HPA:0091002	2	2.44727	0.038674
query_1	TRUE	0.0069343	4076	50	33	0.66	0.00809617	HPA:0600432	HPA	tonsil; germinal center cells[â‰¥Medium]	10976	819	HPA:0600431	2	2.159	0.00809617
query_1	TRUE	0.011431	940	50	14	0.28	0.0148936	HPA:0310433	HPA	lymph node; germinal center cells[High]	10976	437	HPA:0310432	2	1.94192	0.0148936
query_1	TRUE	0.0116122	6027	50	41	0.82	0.00680272	HPA:0310441	HPA	lymph node; non-germinal center cells[â‰¥Low]	10976	438	HPA:0310000	2	1.93509	0.00680272
query_1	TRUE	0.0121608	3966	50	32	0.64	0.00806858	HPA:0310442	HPA	lymph node; non-germinal center cells[â‰¥Medium]	10976	439	HPA:0310441	2	1.91504	0.00806858
query_1	TRUE	0.0138809	305	50	8	0.16	0.0262295	HPA:0091002	HPA	cerebellum; molecular layer cells - cytoplasm/membrane[â‰¥Medium]	10976	150	HPA:0091001	2	1.85758	0.0262295
query_1	TRUE	0.0153568	6082	50	41	0.82	0.0067412	HPA:0600441	HPA	tonsil; non-germinal center cells[â‰¥Low]	10976	821	HPA:0600000	2	1.8137	0.0067412
query_1	TRUE	0.0159212	843	50	13	0.26	0.0154211	HPA:0530723	HPA	spleen; cells in white pulp[High]	10976	756	HPA:0530722	2	1.79802	0.0154211
query_1	TRUE	0.0170009	231	50	7	0.14	0.030303	HPA:0090972	HPA	cerebellum; granular cells - cytoplasm/membrane[â‰¥Medium]	10976	141	HPA:0090971	2	1.76953	0.030303
query_1	TRUE	0.0241353	105	50	5	0.1	0.047619	HPA:0030443	HPA	appendix; non-germinal center cells[High]	10976	49	HPA:0030442	2	1.61735	0.047619
query_1	TRUE	0.0263677	4317	50	33	0.66	0.0076442	HPA:0530721	HPA	spleen; cells in white pulp[â‰¥Low]	10976	754	HPA:0530000	2	1.57893	0.0076442
query_1	TRUE	0.0290263	339	50	8	0.16	0.0235988	HPA:0091001	HPA	cerebellum; molecular layer cells - cytoplasm/membrane[â‰¥Low]	10976	149	HPA:0090000	2	1.53721	0.0235988
query_1	TRUE	0.0317851	6493	50	42	0.84	0.0064685	HPA:0310000	HPA	lymph node	10976	434	HPA:0000000	2	1.49778	0.0064685
query_1	TRUE	0.0381749	263	50	7	0.14	0.026616	HPA:0030442	HPA	appendix; non-germinal center cells[â‰¥Medium]	10976	48	HPA:0030441	2	1.41822	0.026616
query_1	TRUE	0.0432864	803	50	12	0.24	0.014944	HPA:0471471	HPA	skin 2; lymphocytes[â‰¥Low]	10976	688	HPA:0470000	2	1.36365	0.014944
query_1	TRUE	0.0480486	812	50	12	0.24	0.0147783	HPA:0530713	HPA	spleen; cells in red pulp[High]	10976	753	HPA:0530712	2	1.31832	0.0147783
query_1	TRUE	0.000105834	79	37	6	0.162162	0.0759494	KEGG:04662	KEGG	B cell receptor signaling pathway	8014	319	KEGG:00000	2	3.97538	0.0759494
query_1	TRUE	0.000333524	96	37	6	0.162162	0.0625	KEGG:04666	KEGG	Fc gamma R-mediated phagocytosis	8014	321	KEGG:00000	2	3.47687	0.0625
query_1	TRUE	0.00153192	125	37	6	0.162162	0.048	KEGG:04380	KEGG	Osteoclast differentiation	8014	289	KEGG:00000	2	2.81476	0.048
query_1	TRUE	0.0183645	67	37	4	0.108108	0.0597015	KEGG:04664	KEGG	Fc epsilon RI signaling pathway	8014	320	KEGG:00000	2	1.73602	0.0597015
query_1	TRUE	0.0183913	124	37	5	0.135135	0.0403226	KEGG:04611	KEGG	Platelet activation	8014	301	KEGG:00000	2	1.73539	0.0403226
query_1	TRUE	0.0249578	293	37	7	0.189189	0.0238908	KEGG:04060	KEGG	Cytokine-cytokine receptor interaction	8014	234	KEGG:00000	2	1.60279	0.0238908
query_1	TRUE	0.0484555	37	37	3	0.0810811	0.0810811	KEGG:05340	KEGG	Primary immunodeficiency	8014	467	KEGG:00000	2	1.31466	0.0810811
query_1	TRUE	1.57308e-09	2041	53	33	0.622642	0.0161685	REAC:R-HSA-168256	REAC	Immune System	10760	1082	REAC:0000000	2	8.80325	0.0161685
query_1	TRUE	7.62524e-06	705	53	17	0.320755	0.0241135	REAC:R-HSA-1280215	REAC	Cytokine Signaling in Immune system	10760	396	REAC:R-HSA-168256	2	5.11775	0.0241135
query_1	TRUE	3.45736e-05	47	53	6	0.113208	0.12766	REAC:R-HSA-512988	REAC	Interleukin-3, Interleukin-5 and GM-CSF signaling	10760	1153	REAC:R-HSA-449147	2	4.46126	0.12766
query_1	TRUE	8.32503e-05	460	53	13	0.245283	0.0282609	REAC:R-HSA-449147	REAC	Signaling by Interleukins	10760	2079	REAC:R-HSA-1280215	2	4.07961	0.0282609
query_1	TRUE	0.00012335	476	53	13	0.245283	0.0273109	REAC:R-HSA-6798695	REAC	Neutrophil degranulation	10760	1472	REAC:R-HSA-168249	2	3.90886	0.0273109
query_1	TRUE	0.000166605	1093	53	19	0.358491	0.0173833	REAC:R-HSA-168249	REAC	Innate Immune System	10760	1111	REAC:R-HSA-168256	2	3.77831	0.0173833
query_1	TRUE	0.00103901	21	53	4	0.0754717	0.190476	REAC:R-HSA-912631	REAC	Regulation of signaling by CBL	10760	1885	REAC:R-HSA-512988	2	2.98338	0.190476
query_1	TRUE	0.00216427	25	53	4	0.0754717	0.16	REAC:R-HSA-9705462	REAC	Inactivation of CSF3 (G-CSF) signaling	10760	1086	REAC:R-HSA-9674555	2	2.66469	0.16
query_1	TRUE	0.00460401	30	53	4	0.0754717	0.133333	REAC:R-HSA-9674555	REAC	Signaling by CSF3 (G-CSF)	10760	2044	REAC:R-HSA-1280215	2	2.33686	0.133333
query_1	TRUE	0.000216985	6867	72	47	0.652778	0.00684433	TF:M03579	TF	Factor: PEA3; motif: AGGAAGT	19959	6514	TF:M00000	2	3.66357	0.00684433
query_1	TRUE	0.000216985	6867	72	47	0.652778	0.00684433	TF:M07382	TF	Factor: Fli-1; motif: MGGAAGT	19959	2460	TF:M00000	2	3.66357	0.00684433
query_1	TRUE	0.000216985	6867	72	47	0.652778	0.00684433	TF:M02278	TF	Factor: SPI1; motif: AGGAAGT	19959	7936	TF:M00000	2	3.66357	0.00684433
query_1	TRUE	0.000216985	6867	72	47	0.652778	0.00684433	TF:M01870	TF	Factor: C-ets-1; motif: AGGAAGN	19959	818	TF:M00000	2	3.66357	0.00684433
query_1	TRUE	0.000374497	1471	72	20	0.277778	0.0135962	TF:M07382_1	TF	Factor: Fli-1; motif: MGGAAGT; match class: 1	19959	2461	TF:M07382	2	3.42655	0.0135962
query_1	TRUE	0.000374497	1471	72	20	0.277778	0.0135962	TF:M03579_1	TF	Factor: PEA3; motif: AGGAAGT; match class: 1	19959	6515	TF:M03579	2	3.42655	0.0135962
query_1	TRUE	0.000374497	1471	72	20	0.277778	0.0135962	TF:M01870_1	TF	Factor: C-ets-1; motif: AGGAAGN; match class: 1	19959	819	TF:M01870	2	3.42655	0.0135962
query_1	TRUE	0.000374497	1471	72	20	0.277778	0.0135962	TF:M02278_1	TF	Factor: SPI1; motif: AGGAAGT; match class: 1	19959	7937	TF:M02278	2	3.42655	0.0135962
query_1	TRUE	0.000546031	3815	72	33	0.458333	0.00865007	TF:M12544	TF	Factor: ELF3; motif: NNCCACTTCCTGNN	19959	1766	TF:M00000	2	3.26278	0.00865007
query_1	TRUE	0.00161091	1459	72	19	0.263889	0.0130226	TF:M00339_1	TF	Factor: c-Ets-1; motif: RCAGGAAGTGNNTNS; match class: 1	19959	2173	TF:M00339	2	2.79293	0.0130226
query_1	TRUE	0.00267134	2331	72	24	0.333333	0.010296	TF:M00971	TF	Factor: Ets; motif: ACTTCCTS	19959	2190	TF:M00000	2	2.57327	0.010296
query_1	TRUE	0.00299916	2894	72	27	0.375	0.00932965	TF:M00655_1	TF	Factor: PEA3; motif: ACWTCCK; match class: 1	19959	6513	TF:M00655	2	2.523	0.00932965
query_1	TRUE	0.00474696	3155	72	28	0.388889	0.0088748	TF:M08881	TF	Factor: ETSLIKE; motif: NACTTCCTNN	19959	2184	TF:M00000	2	2.32358	0.0088748
query_1	TRUE	0.00762152	6853	72	44	0.611111	0.00642055	TF:M00339	TF	Factor: c-Ets-1; motif: RCAGGAAGTGNNTNS	19959	2172	TF:M00000	2	2.11796	0.00642055
query_1	TRUE	0.00891397	2313	72	23	0.319444	0.0099438	TF:M12497	TF	Factor: SPI1; motif: NNNAAAGAGGAAGTGANNNN	19959	7946	TF:M00000	2	2.04993	0.0099438
query_1	TRUE	0.017101	9523	72	53	0.736111	0.00556547	TF:M00655	TF	Factor: PEA3; motif: ACWTCCK	19959	6512	TF:M00000	2	1.76698	0.00556547
query_1	TRUE	0.0183734	2414	72	23	0.319444	0.00952775	TF:M10073	TF	Factor: PU.1; motif: NRAAAGAGGAAGTGRNN	19959	7944	TF:M00000	2	1.73581	0.00952775
query_1	TRUE	0.0335785	5235	72	36	0.5	0.00687679	TF:M00340	TF	Factor: c-Ets; motif: KRCAGGAARTRNKT	19959	2186	TF:M00000	2	1.47394	0.00687679
query_1	TRUE	0.0370436	3500	72	28	0.388889	0.008	TF:M02078	TF	Factor: SPI1; motif: NGRGGAAGTN	19959	7934	TF:M00000	2	1.43129	0.008
query_1	TRUE	0.0451453	2181	72	21	0.291667	0.00962861	TF:M12498	TF	Factor: SPIB; motif: NNTCACTTCCTCTTTN	19959	7966	TF:M00000	2	1.34539	0.00962861
query_1	TRUE	0.046749	2186	72	21	0.291667	0.00960659	TF:M03994	TF	Factor: SPI1; motif: AAAAAGCGGAAGTW	19959	7938	TF:M00000	2	1.33023	0.00960659
query_1	TRUE	2.77032e-14	63	42	12	0.285714	0.190476	WP:WP3945	WP	TYROBP causal network in microglia	7806	51	WP:000000	2	13.5575	0.190476
query_1	TRUE	0.000241073	40	42	5	0.119048	0.125	WP:WP3937	WP	Microglia pathogen phagocytosis pathway	7806	436	WP:000000	2	3.61785	0.125
query_1	TRUE	0.000674166	49	42	5	0.119048	0.102041	WP:WP286	WP	IL-3 signaling pathway	7806	550	WP:000000	2	3.17123	0.102041
query_1	TRUE	0.00145835	98	42	6	0.142857	0.0612245	WP:WP23	WP	B cell receptor signaling pathway	7806	689	WP:000000	2	2.83614	0.0612245
query_1	TRUE	2.24522e-06	1010	58	17	0.293103	0.0168317	GO:0000902	GO:BP	cell morphogenesis	21029	306	GO:0009653	3	5.64874	0.0168317
query_1	TRUE	4.0386e-06	2074	58	23	0.396552	0.0110897	GO:0006928	GO:BP	movement of cell or subcellular component	21029	2868	GO:0009987	3	5.39377	0.0110897
query_1	TRUE	1.5369e-05	2428	58	24	0.413793	0.00988468	GO:0007399	GO:BP	nervous system development	21029	3278	GO:0048731	3	4.81335	0.00988468
query_1	TRUE	2.23351e-05	619	58	13	0.224138	0.0210016	GO:0048812	GO:BP	neuron projection morphogenesis	21029	15117	GO:0031175|GO:0120039	3	4.65101	0.0210016
query_1	TRUE	2.41484e-05	749	58	14	0.241379	0.0186916	GO:0032989	GO:BP	cellular component morphogenesis	21029	9185	GO:0009653|GO:0016043|GO:0048869	3	4.61711	0.0186916
query_1	TRUE	2.96652e-05	634	58	13	0.224138	0.0205047	GO:0120039	GO:BP	plasma membrane bounded cell projection morphogenesis	21029	22798	GO:0048858	3	4.52775	0.0205047
query_1	TRUE	2.99371e-05	1364	58	18	0.310345	0.0131965	GO:0030182	GO:BP	neuron differentiation	21029	7736	GO:0030154|GO:0048699	3	4.52379	0.0131965
query_1	TRUE	3.19569e-05	638	58	13	0.224138	0.0203762	GO:0048858	GO:BP	cell projection morphogenesis	21029	15162	GO:0000902|GO:0030030|GO:0032990	3	4.49543	0.0203762
query_1	TRUE	4.51884e-05	657	58	13	0.224138	0.0197869	GO:0032990	GO:BP	cell part morphogenesis	21029	9186	GO:0032989	3	4.34497	0.0197869
query_1	TRUE	6.50166e-05	953	58	15	0.258621	0.0157398	GO:0031175	GO:BP	neuron projection development	21029	8222	GO:0048666|GO:0120036	3	4.18698	0.0157398
query_1	TRUE	7.04304e-05	559	58	12	0.206897	0.0214669	GO:0048667	GO:BP	cell morphogenesis involved in neuron differentiation	21029	14982	GO:0000904|GO:0048666	3	4.15224	0.0214669
query_1	TRUE	8.53341e-05	1639	58	19	0.327586	0.0115924	GO:0022008	GO:BP	neurogenesis	21029	7550	GO:0007399|GO:0030154	3	4.06888	0.0115924
query_1	TRUE	0.000111068	2685	58	24	0.413793	0.00893855	GO:0009653	GO:BP	anatomical structure morphogenesis	21029	4023	GO:0032502|GO:0048856	3	3.95441	0.00893855
query_1	TRUE	0.000127881	718	58	13	0.224138	0.0181058	GO:0000904	GO:BP	cell morphogenesis involved in differentiation	21029	308	GO:0000902|GO:0048468	3	3.8932	0.0181058
query_1	TRUE	0.000141155	11067	58	50	0.862069	0.00451794	GO:0050794	GO:BP	regulation of cellular process	21029	15340	GO:0009987|GO:0050789	3	3.8503	0.00451794
query_1	TRUE	0.000156284	1519	58	18	0.310345	0.0118499	GO:0048699	GO:BP	generation of neurons	21029	15013	GO:0022008	3	3.80609	0.0118499
query_1	TRUE	0.000178131	1029	58	15	0.258621	0.0145773	GO:0051270	GO:BP	regulation of cellular component movement	21029	15734	GO:0006928|GO:0032879|GO:0050794	3	3.74926	0.0145773
query_1	TRUE	0.000236131	295	58	9	0.155172	0.0305085	GO:0006470	GO:BP	protein dephosphorylation	21029	2450	GO:0006464|GO:0016311	3	3.62685	0.0305085
query_1	TRUE	0.000402534	1435	58	17	0.293103	0.0118467	GO:0007010	GO:BP	cytoskeleton organization	21029	2935	GO:0006996	3	3.3952	0.0118467
query_1	TRUE	0.000443693	1104	58	15	0.258621	0.013587	GO:0048666	GO:BP	neuron development	21029	14981	GO:0030182|GO:0048468	3	3.35292	0.013587
query_1	TRUE	0.000451718	1821	58	19	0.327586	0.0104338	GO:0040011	GO:BP	locomotion	21029	11470	GO:0008150	3	3.34513	0.0104338
query_1	TRUE	0.000474919	12859	58	53	0.913793	0.00412163	GO:0065007	GO:BP	biological regulation	21029	18628	GO:0008150	3	3.32338	0.00412163
query_1	TRUE	0.000524461	2246	58	21	0.362069	0.00934996	GO:0051128	GO:BP	regulation of cellular component organization	21029	15613	GO:0016043|GO:0050794	3	3.28029	0.00934996
query_1	TRUE	0.000594048	2701	58	23	0.396552	0.00851536	GO:0032879	GO:BP	regulation of localization	21029	9091	GO:0050789|GO:0051179	3	3.22618	0.00851536
query_1	TRUE	0.00127104	12142	58	51	0.87931	0.0042003	GO:0050789	GO:BP	regulation of biological process	21029	15336	GO:0008150|GO:0065007	3	2.89584	0.0042003
query_1	TRUE	0.00150529	6425	58	36	0.62069	0.00560311	GO:0051179	GO:BP	localization	21029	15663	GO:0008150	3	2.82238	0.00560311
query_1	TRUE	0.00198323	278	58	8	0.137931	0.028777	GO:0032409	GO:BP	regulation of transporter activity	21029	8748	GO:0065009	3	2.70263	0.028777
query_1	TRUE	0.00250852	391	58	9	0.155172	0.0230179	GO:0032970	GO:BP	regulation of actin filament-based process	21029	9169	GO:0030029|GO:0050794	3	2.60058	0.0230179
query_1	TRUE	0.00271527	1454	58	16	0.275862	0.0110041	GO:0016477	GO:BP	cell migration	21029	5822	GO:0048870	3	2.56619	0.0110041
query_1	TRUE	0.00305947	4784	58	30	0.517241	0.0062709	GO:0048731	GO:BP	system development	21029	15045	GO:0007275|GO:0048856	3	2.51435	0.0062709
query_1	TRUE	0.00327674	800	58	12	0.206897	0.015	GO:0030029	GO:BP	actin filament-based process	21029	7681	GO:0009987	3	2.48456	0.015
query_1	TRUE	0.00346063	2079	58	19	0.327586	0.00913901	GO:0048468	GO:BP	cell development	21029	14819	GO:0030154|GO:0048856|GO:0048869	3	2.46085	0.00913901
query_1	TRUE	0.00436509	33	58	4	0.0689655	0.121212	GO:0086004	GO:BP	regulation of cardiac muscle cell contraction	21029	20981	GO:0055117|GO:0086003|GO:1903115	3	2.36001	0.121212
query_1	TRUE	0.00510574	687	58	11	0.189655	0.0160116	GO:0034330	GO:BP	cell junction organization	21029	9855	GO:0016043	3	2.29194	0.0160116
query_1	TRUE	0.00517075	6094	58	34	0.586207	0.00557926	GO:0048518	GO:BP	positive regulation of biological process	21029	14854	GO:0008150|GO:0050789	3	2.28645	0.00557926
query_1	TRUE	0.00558604	431	58	9	0.155172	0.0208817	GO:0016311	GO:BP	dephosphorylation	21029	5783	GO:0006796	3	2.2529	0.0208817
query_1	TRUE	0.00866657	39	58	4	0.0689655	0.102564	GO:1903115	GO:BP	regulation of actin filament-based movement	21029	26226	GO:0030048|GO:0032970|GO:0051270	3	2.06215	0.102564
query_1	TRUE	0.0123516	251	58	7	0.12069	0.0278884	GO:0032412	GO:BP	regulation of ion transmembrane transporter activity	21029	8751	GO:0022898|GO:0034765	3	1.90828	0.0278884
query_1	TRUE	0.013219	5114	58	30	0.517241	0.00586625	GO:0007275	GO:BP	multicellular organism development	21029	3168	GO:0032501|GO:0048856	3	1.8788	0.00586625
query_1	TRUE	0.0134932	1645	58	16	0.275862	0.00972644	GO:0048870	GO:BP	cell motility	21029	15173	GO:0006928|GO:0040011|GO:0051674	3	1.86988	0.00972644
query_1	TRUE	0.0134932	1645	58	16	0.275862	0.00972644	GO:0051674	GO:BP	localization of cell	21029	16045	GO:0009987|GO:0051179	3	1.86988	0.00972644
query_1	TRUE	0.0140211	3741	58	25	0.431034	0.00668271	GO:0065008	GO:BP	regulation of biological quality	21029	18629	GO:0065007	3	1.85322	0.00668271
query_1	TRUE	0.0147582	926	58	12	0.206897	0.012959	GO:0022603	GO:BP	regulation of anatomical structure morphogenesis	21029	7601	GO:0009653|GO:0050793	3	1.83097	0.012959
query_1	TRUE	0.0159465	261	58	7	0.12069	0.0268199	GO:0022898	GO:BP	regulation of transmembrane transporter activity	21029	7620	GO:0032409|GO:0034762	3	1.79734	0.0268199
query_1	TRUE	0.0169802	1109	58	13	0.224138	0.0117223	GO:0033043	GO:BP	regulation of organelle organization	21029	9215	GO:0006996|GO:0051128	3	1.77006	0.0117223
query_1	TRUE	0.0171795	1479	58	15	0.258621	0.010142	GO:0120036	GO:BP	plasma membrane bounded cell projection organization	21029	22797	GO:0030030	3	1.76499	0.010142
query_1	TRUE	0.0171813	940	58	12	0.206897	0.012766	GO:0044087	GO:BP	regulation of cellular component biogenesis	21029	12640	GO:0044085|GO:0050794	3	1.76494	0.012766
query_1	TRUE	0.0178844	6411	58	34	0.586207	0.00530338	GO:0023052	GO:BP	signaling	21029	7654	GO:0008150	3	1.74753	0.00530338
query_1	TRUE	0.0218266	7793	58	38	0.655172	0.00487617	GO:0016043	GO:BP	cellular component organization	21029	5650	GO:0071840	3	1.66101	0.00487617
query_1	TRUE	0.0218852	6465	58	34	0.586207	0.00525909	GO:0007154	GO:BP	cell communication	21029	3056	GO:0009987	3	1.65985	0.00525909
query_1	TRUE	0.0240615	1521	58	15	0.258621	0.00986193	GO:0030030	GO:BP	cell projection organization	21029	7682	GO:0016043	3	1.61868	0.00986193
query_1	TRUE	0.0243592	5561	58	31	0.534483	0.00557454	GO:0048522	GO:BP	positive regulation of cellular process	21029	14858	GO:0009987|GO:0048518|GO:0050794	3	1.61334	0.00557454
query_1	TRUE	0.0266126	523	58	9	0.155172	0.0172084	GO:0051493	GO:BP	regulation of cytoskeleton organization	21029	15901	GO:0007010|GO:0033043	3	1.57491	0.0172084
query_1	TRUE	0.029902	2639	58	20	0.344828	0.00757863	GO:0035556	GO:BP	intracellular signal transduction	21029	10475	GO:0007165	3	1.5243	0.00757863
query_1	TRUE	0.0305212	5925	58	32	0.551724	0.00540084	GO:0007165	GO:BP	signal transduction	21029	3067	GO:0007154|GO:0009987|GO:0023052|GO:0050794|GO:0051716	3	1.5154	0.00540084
query_1	TRUE	0.0401297	118	58	5	0.0862069	0.0423729	GO:0032411	GO:BP	positive regulation of transporter activity	21029	8750	GO:0032409|GO:0044093|GO:0051050	3	1.39653	0.0423729
query_1	TRUE	0.0404984	419	58	8	0.137931	0.0190931	GO:0042391	GO:BP	regulation of membrane potential	21029	11729	GO:0065008	3	1.39256	0.0190931
query_1	TRUE	0.041197	420	58	8	0.137931	0.0190476	GO:0034329	GO:BP	cell junction assembly	21029	9854	GO:0022607|GO:0034330	3	1.38513	0.0190476
query_1	TRUE	0.0430995	7994	58	38	0.655172	0.00475357	GO:0071840	GO:BP	cellular component organization or biogenesis	21029	19777	GO:0009987	3	1.36553	0.00475357
query_1	TRUE	0.044629	5718	58	31	0.534483	0.00542148	GO:0048856	GO:BP	anatomical structure development	21029	15160	GO:0032502	3	1.35038	0.00542148
query_1	TRUE	0.0486719	3	58	2	0.0344828	0.666667	GO:0098907	GO:BP	regulation of SA node cell action potential	21029	22173	GO:0010646|GO:0086015|GO:0098901	3	1.31272	0.666667
query_1	TRUE	0.0495757	431	58	8	0.137931	0.0185615	GO:0007409	GO:BP	axonogenesis	21029	3286	GO:0048667|GO:0048812|GO:0061564	3	1.30473	0.0185615
query_1	TRUE	3.33105e-07	1347	59	19	0.322034	0.0141054	GO:0043005	GO:CC	neuron projection	21672	2090	GO:0120025	3	6.47742	0.0141054
query_1	TRUE	2.33103e-06	2076	59	22	0.372881	0.0105973	GO:0030054	GO:CC	cell junction	21672	1025	GO:0110165	3	5.63245	0.0105973
query_1	TRUE	3.09772e-06	2312	59	23	0.389831	0.0099481	GO:0042995	GO:CC	cell projection	21672	2089	GO:0110165	3	5.50896	0.0099481
query_1	TRUE	7.0172e-06	2205	59	22	0.372881	0.00997732	GO:0120025	GO:CC	plasma membrane bounded cell projection	21672	3858	GO:0042995	3	5.15384	0.00997732
query_1	TRUE	1.63648e-05	15	59	4	0.0677966	0.266667	GO:0033268	GO:CC	node of Ranvier	21672	1639	GO:0044304|GO:0110165	3	4.78609	0.266667
query_1	TRUE	6.64368e-05	51	59	5	0.0847458	0.0980392	GO:0014704	GO:CC	intercalated disc	21672	826	GO:0044291	3	4.17759	0.0980392
query_1	TRUE	0.000139259	59	59	5	0.0847458	0.0847458	GO:0044304	GO:CC	main axon	21672	2309	GO:0030424|GO:0110165	3	3.85618	0.0847458
query_1	TRUE	0.000171255	613	59	11	0.186441	0.0179445	GO:0098794	GO:CC	postsynapse	21672	3622	GO:0045202|GO:0110165	3	3.76636	0.0179445
query_1	TRUE	0.000366722	1305	59	15	0.254237	0.0114943	GO:0045202	GO:CC	synapse	21672	2443	GO:0030054	3	3.43566	0.0114943
query_1	TRUE	0.000405838	73	59	5	0.0847458	0.0684932	GO:0044291	GO:CC	cell-cell contact zone	21672	2296	GO:0005911	3	3.39165	0.0684932
query_1	TRUE	0.000679244	6181	59	34	0.576271	0.00550073	GO:0071944	GO:CC	cell periphery	21672	3128	GO:0110165	3	3.16797	0.00550073
query_1	TRUE	0.00114927	5694	59	32	0.542373	0.00561995	GO:0005886	GO:CC	plasma membrane	21672	514	GO:0016020|GO:0071944	3	2.93958	0.00561995
query_1	TRUE	0.0013398	612	59	10	0.169492	0.0163399	GO:0030425	GO:CC	dendrite	21672	1099	GO:0043005|GO:0097447	3	2.87296	0.0163399
query_1	TRUE	0.0013788	614	59	10	0.169492	0.0162866	GO:0097447	GO:CC	dendritic tree	21672	3353	GO:0036477|GO:0043005	3	2.8605	0.0162866
query_1	TRUE	0.00177472	495	59	9	0.152542	0.0181818	GO:0005911	GO:CC	cell-cell junction	21672	536	GO:0070161	3	2.75087	0.0181818
query_1	TRUE	0.00180132	633	59	10	0.169492	0.0157978	GO:0030424	GO:CC	axon	21672	1098	GO:0043005	3	2.74441	0.0157978
query_1	TRUE	0.00187238	2334	59	19	0.322034	0.00814053	GO:0005856	GO:CC	cytoskeleton	21672	491	GO:0043232	3	2.72761	0.00814053
query_1	TRUE	0.00210883	15	59	3	0.0508475	0.2	GO:0043194	GO:CC	axon initial segment	21672	2109	GO:0044304|GO:0110165	3	2.67596	0.2
query_1	TRUE	0.00331741	835	59	11	0.186441	0.0131737	GO:0036477	GO:CC	somatodendritic compartment	21672	1960	GO:0110165	3	2.4792	0.0131737
query_1	TRUE	0.00346863	839	59	11	0.186441	0.0131108	GO:0070161	GO:CC	anchoring junction	21672	2761	GO:0030054	3	2.45984	0.0131108
query_1	TRUE	0.00823695	135	59	5	0.0847458	0.037037	GO:0042383	GO:CC	sarcolemma	21672	2021	GO:0005886	3	2.08423	0.037037
query_1	TRUE	0.00983175	70	59	4	0.0677966	0.0571429	GO:0031594	GO:CC	neuromuscular junction	21672	1383	GO:0045202	3	2.00737	0.0571429
query_1	TRUE	0.0114845	352	59	7	0.118644	0.0198864	GO:0098984	GO:CC	neuron to neuron synapse	21672	3700	GO:0045202	3	1.93989	0.0198864
query_1	TRUE	0.0150495	78	59	4	0.0677966	0.0512821	GO:0016528	GO:CC	sarcoplasm	21672	883	GO:0005737	3	1.82248	0.0512821
query_1	TRUE	0.0258391	1237	59	12	0.20339	0.00970089	GO:0098590	GO:CC	plasma membrane region	21672	3579	GO:0005886|GO:0016020	3	1.58772	0.00970089
query_1	TRUE	0.00123683	131	59	6	0.101695	0.0458015	GO:0044325	GO:MF	transmembrane transporter binding	20166	7054	GO:0005515	3	2.90769	0.0458015
query_1	TRUE	0.00154716	14799	59	57	0.966102	0.00385161	GO:0005515	GO:MF	protein binding	20166	1875	GO:0005488	3	2.81046	0.00385161
query_1	TRUE	0.00984644	188	59	6	0.101695	0.0319149	GO:0004721	GO:MF	phosphoprotein phosphatase activity	20166	1286	GO:0016791|GO:0140096	3	2.00672	0.0319149
query_1	TRUE	0.0158564	550	59	9	0.152542	0.0163636	GO:0050839	GO:MF	cell adhesion molecule binding	20166	9067	GO:0005515	3	1.79979	0.0163636
query_1	TRUE	0.0108469	178	42	6	0.142857	0.0337079	HPA:0091042	HPA	cerebellum; processes in white matter[â‰¥Medium]	10976	165	HPA:0091041	3	1.9647	0.0337079
query_1	TRUE	0.0243613	206	42	6	0.142857	0.0291262	HPA:0091041	HPA	cerebellum; processes in white matter[â‰¥Low]	10976	164	HPA:0090000	3	1.6133	0.0291262
query_1	TRUE	0.000128764	607	55	13	0.236364	0.0214168	MIRNA:hsa-miR-21-5p	MIRNA	hsa-miR-21-5p	14830	399	MIRNA:000000	3	3.8902	0.0214168
query_1	TRUE	0.00281179	86	36	5	0.138889	0.0581395	REAC:R-HSA-6794362	REAC	Protein-protein interactions at synapses	10760	1682	REAC:R-HSA-112316	3	2.55102	0.0581395
query_1	TRUE	0.0137164	21	36	3	0.0833333	0.142857	REAC:R-HSA-8849932	REAC	Synaptic adhesion-like molecules	10760	2174	REAC:R-HSA-6794362	3	1.86276	0.142857
query_1	TRUE	0.0269146	444	36	8	0.222222	0.018018	REAC:R-HSA-9012999	REAC	RHO GTPase cycle	10760	1711	REAC:R-HSA-194315	3	1.57001	0.018018
query_1	TRUE	0.0453036	31	36	3	0.0833333	0.0967742	REAC:R-HSA-445095	REAC	Interaction between L1 and Ankyrins	10760	1126	REAC:R-HSA-373760	3	1.34387	0.0967742
query_1	TRUE	1.06333e-05	34	27	5	0.185185	0.147059	WP:WP4875	WP	Disruption of postsynaptic signaling by CNV	7806	281	WP:000000	3	4.97333	0.147059
query_1	TRUE	9.56384e-06	6425	55	38	0.690909	0.0059144	GO:0051179	GO:BP	localization	21029	15663	GO:0008150	4	5.01937	0.0059144
query_1	TRUE	2.97219e-05	4760	55	32	0.581818	0.00672269	GO:0006810	GO:BP	transport	21029	2768	GO:0051234	4	4.52692	0.00672269
query_1	TRUE	6.91699e-05	4920	55	32	0.581818	0.00650407	GO:0051234	GO:BP	establishment of localization	21029	15707	GO:0051179	4	4.16008	0.00650407
query_1	TRUE	0.0141969	1544	55	15	0.272727	0.00971503	GO:0006811	GO:BP	ion transport	21029	2769	GO:0006810	4	1.84781	0.00971503
query_1	TRUE	0.0361013	436	55	8	0.145455	0.0183486	GO:0050804	GO:BP	modulation of chemical synaptic transmission	21029	15348	GO:0007268|GO:0099177	4	1.44248	0.0183486
query_1	TRUE	0.0367009	437	55	8	0.145455	0.0183066	GO:0099177	GO:BP	regulation of trans-synaptic signaling	21029	22321	GO:0010646|GO:0023051|GO:0099537	4	1.43532	0.0183066
query_1	TRUE	0.0437293	3	55	2	0.0363636	0.666667	GO:0060327	GO:BP	cytoplasmic actin-based contraction involved in cell motility	21029	17117	GO:0048870|GO:0070252	4	1.35923	0.666667
query_1	TRUE	2.69711e-05	6181	58	36	0.62069	0.0058243	GO:0071944	GO:CC	cell periphery	21672	3128	GO:0110165	4	4.5691	0.0058243
query_1	TRUE	5.04161e-05	5694	58	34	0.586207	0.0059712	GO:0005886	GO:CC	plasma membrane	21672	514	GO:0016020|GO:0071944	4	4.29743	0.0059712
query_1	TRUE	0.00158279	633	58	10	0.172414	0.0157978	GO:0030424	GO:CC	axon	21672	1098	GO:0043005	4	2.80058	0.0157978
query_1	TRUE	0.0169789	835	58	10	0.172414	0.011976	GO:0036477	GO:CC	somatodendritic compartment	21672	1960	GO:0110165	4	1.77009	0.011976
query_1	TRUE	0.0499067	1347	58	12	0.206897	0.00890869	GO:0043005	GO:CC	neuron projection	21672	2090	GO:0120025	4	1.30184	0.00890869
query_1	TRUE	0.00608695	2610	33	19	0.575758	0.00727969	HPA:0100212	HPA	cerebral cortex; neuropil[â‰¥Medium]	10976	196	HPA:0100211	4	2.2156	0.00727969
query_1	TRUE	0.00730683	86	53	5	0.0943396	0.0581395	MIRNA:hsa-miR-4301	MIRNA	hsa-miR-4301	14830	980	MIRNA:000000	4	2.13627	0.0581395
query_1	TRUE	0.020386	3	53	2	0.0377358	0.666667	MIRNA:hsa-miR-1274b	MIRNA	hsa-miR-1274b	14830	154	MIRNA:000000	4	1.69067	0.666667
query_1	TRUE	0.0195583	12953	60	54	0.9	0.00416892	TF:M07486	TF	Factor: ZNF300; motif: SWGGGGGSN	19959	9890	TF:M00000	4	1.70867	0.00416892
query_1	TRUE	0.00168003	3741	53	25	0.471698	0.00668271	GO:0065008	GO:BP	regulation of biological quality	21029	18629	GO:0065007	5	2.77468	0.00668271
query_1	TRUE	0.00694608	2428	53	19	0.358491	0.00782537	GO:0007399	GO:BP	nervous system development	21029	3278	GO:0048731	5	2.15826	0.00782537
query_1	TRUE	0.00947212	173	53	6	0.113208	0.0346821	GO:0035725	GO:BP	sodium ion transmembrane transport	21029	10596	GO:0006814|GO:0098662	5	2.02355	0.0346821
query_1	TRUE	0.0194137	712	53	10	0.188679	0.0140449	GO:0099537	GO:BP	trans-synaptic signaling	21029	22352	GO:0099536	5	1.71189	0.0140449
query_1	TRUE	0.0258953	736	53	10	0.188679	0.013587	GO:0099536	GO:BP	synaptic signaling	21029	22351	GO:0007267	5	1.58678	0.013587
query_1	TRUE	0.0331978	1116	53	12	0.226415	0.0107527	GO:0034220	GO:BP	ion transmembrane transport	21029	9784	GO:0006811|GO:0055085	5	1.47889	0.0107527
query_1	TRUE	3.81938e-07	5897	56	37	0.660714	0.00627438	GO:0031224	GO:CC	intrinsic component of membrane	21672	1235	GO:0016020|GO:0110165	5	6.41801	0.00627438
query_1	TRUE	8.86768e-07	5741	56	36	0.642857	0.00627068	GO:0016021	GO:CC	integral component of membrane	21672	850	GO:0031224	5	6.05219	0.00627068
query_1	TRUE	2.08303e-05	9818	56	45	0.803571	0.00458342	GO:0016020	GO:CC	membrane	21672	849	GO:0110165	5	4.6813	0.00458342
query_1	TRUE	4.08074e-05	1713	56	18	0.321429	0.0105079	GO:0031226	GO:CC	intrinsic component of plasma membrane	21672	1237	GO:0005886|GO:0031224	5	4.38926	0.0105079
query_1	TRUE	0.000111944	1630	56	17	0.303571	0.0104294	GO:0005887	GO:CC	integral component of plasma membrane	21672	515	GO:0016021|GO:0031226	5	3.951	0.0104294
query_1	TRUE	0.000190411	1305	56	15	0.267857	0.0114943	GO:0045202	GO:CC	synapse	21672	2443	GO:0030054	5	3.72031	0.0114943
query_1	TRUE	0.00182435	6181	56	32	0.571429	0.00517716	GO:0071944	GO:CC	cell periphery	21672	3128	GO:0110165	5	2.73889	0.00517716
query_1	TRUE	0.00242737	51	56	4	0.0714286	0.0784314	GO:0099061	GO:CC	integral component of postsynaptic density membrane	21672	3734	GO:0099060|GO:0099146	5	2.61486	0.0784314
query_1	TRUE	0.00263033	292	56	7	0.125	0.0239726	GO:0034702	GO:CC	ion channel complex	21672	1768	GO:1902495	5	2.57999	0.0239726
query_1	TRUE	0.00328747	55	56	4	0.0714286	0.0727273	GO:0099146	GO:CC	intrinsic component of postsynaptic density membrane	21672	3758	GO:0098839|GO:0098948	5	2.48314	0.0727273
query_1	TRUE	0.0033779	5694	56	30	0.535714	0.0052687	GO:0005886	GO:CC	plasma membrane	21672	514	GO:0016020|GO:0071944	5	2.47135	0.0052687
query_1	TRUE	0.0059289	221	56	6	0.107143	0.0271493	GO:0034703	GO:CC	cation channel complex	21672	1769	GO:0034702	5	2.22703	0.0271493
query_1	TRUE	0.0108335	26	56	3	0.0535714	0.115385	GO:0032281	GO:CC	AMPA glutamate receptor complex	21672	1509	GO:0008328|GO:0034703	5	1.96523	0.115385
query_1	TRUE	0.0127381	2076	56	16	0.285714	0.00770713	GO:0030054	GO:CC	cell junction	21672	1025	GO:0110165	5	1.8949	0.00770713
query_1	TRUE	0.0131566	78	56	4	0.0714286	0.0512821	GO:0099060	GO:CC	integral component of postsynaptic specialization membrane	21672	3733	GO:0098948|GO:0099055	5	1.88086	0.0512821
query_1	TRUE	0.0146765	382	56	7	0.125	0.0183246	GO:1902495	GO:CC	transmembrane transporter complex	21672	4013	GO:0016021|GO:0098796|GO:1990351	5	1.83338	0.0183246
query_1	TRUE	0.0160092	82	56	4	0.0714286	0.0487805	GO:0098948	GO:CC	intrinsic component of postsynaptic specialization membrane	21672	3683	GO:0098936|GO:0099634	5	1.79563	0.0487805
query_1	TRUE	0.0186934	397	56	7	0.125	0.0176322	GO:1990351	GO:CC	transporter complex	21672	4267	GO:0032991	5	1.72831	0.0176322
query_1	TRUE	0.0230322	90	56	4	0.0714286	0.0444444	GO:0098839	GO:CC	postsynaptic density membrane	21672	3643	GO:0014069|GO:0099634	5	1.63766	0.0444444
query_1	TRUE	0.0401253	40	56	3	0.0535714	0.075	GO:0008328	GO:CC	ionotropic glutamate receptor complex	21672	620	GO:0005887|GO:0034702|GO:0098878	5	1.39658	0.075
query_1	TRUE	0.046453	42	56	3	0.0535714	0.0714286	GO:0098878	GO:CC	neurotransmitter receptor complex	21672	3662	GO:0098802	5	1.33299	0.0714286
query_1	TRUE	0.0478225	1606	56	13	0.232143	0.00809465	GO:0005794	GO:CC	Golgi apparatus	21672	437	GO:0005737|GO:0012505|GO:0043231	5	1.32037	0.00809465
query_1	TRUE	0.00823952	435	53	8	0.150943	0.0183908	GO:0005216	GO:MF	ion channel activity	20166	1707	GO:0015075|GO:0015267|GO:0015318	5	2.0841	0.0183908
query_1	TRUE	0.0176609	484	53	8	0.150943	0.0165289	GO:0015267	GO:MF	channel activity	20166	3065	GO:0022803	5	1.75299	0.0165289
query_1	TRUE	0.0179212	485	53	8	0.150943	0.0164948	GO:0022803	GO:MF	passive transmembrane transporter activity	20166	4647	GO:0022857	5	1.74663	0.0164948
query_1	TRUE	0.00424916	4989	27	23	0.851852	0.00461014	HPA:0100211	HPA	cerebral cortex; neuropil[â‰¥Low]	10976	195	HPA:0100000	5	2.3717	0.00461014
query_1	TRUE	0.000389042	7194	57	40	0.701754	0.00556019	TF:M00695_1	TF	Factor: ETF; motif: GVGGMGG; match class: 1	19959	2161	TF:M00695	5	3.41	0.00556019
query_1	TRUE	0.00101254	10870	57	49	0.859649	0.00450782	TF:M12694	TF	Factor: ZFP14; motif: SCNNYCCNGNNSCTSCNC	19959	9234	TF:M00000	5	2.99459	0.00450782
query_1	TRUE	0.00118595	6797	57	38	0.666667	0.0055907	TF:M12722_1	TF	Factor: ZXDL; motif: GSGSCNNGGGMRGCNCCGGGS; match class: 1	19959	11641	TF:M12722	5	2.92593	0.0055907
query_1	TRUE	0.00697237	5964	57	34	0.596491	0.00570087	TF:M10107	TF	Factor: DB1; motif: GGRRRRGRRGGAGGGGGNGRRR	19959	1194	TF:M00000	5	2.15662	0.00570087
query_1	TRUE	0.00830914	10609	57	47	0.824561	0.0044302	TF:M00986_1	TF	Factor: Churchill; motif: CGGGNN; match class: 1	19959	833	TF:M00986	5	2.08044	0.0044302
query_1	TRUE	0.00985572	10659	57	47	0.824561	0.00440942	TF:M00695	TF	Factor: ETF; motif: GVGGMGG	19959	2160	TF:M00000	5	2.00631	0.00440942
query_1	TRUE	0.0120988	5204	57	31	0.54386	0.00595696	TF:M12694_1	TF	Factor: ZFP14; motif: SCNNYCCNGNNSCTSCNC; match class: 1	19959	9235	TF:M12694	5	1.91726	0.00595696
query_1	TRUE	0.0139424	3355	57	24	0.421053	0.0071535	TF:M12604	TF	Factor: EZF2; motif: NNCCNSNSCNMCTCCMYCTT	19959	2366	TF:M00000	5	1.85566	0.0071535
query_1	TRUE	0.0153202	10790	57	47	0.824561	0.00435589	TF:M12722	TF	Factor: ZXDL; motif: GSGSCNNGGGMRGCNCCGGGS	19959	11640	TF:M00000	5	1.81474	0.00435589
query_1	TRUE	0.0168742	4712	57	29	0.508772	0.0061545	TF:M01857_1	TF	Factor: AP-2alpha; motif: NGCCYSNNGSN; match class: 1	19959	135	TF:M01857	5	1.77278	0.0061545
query_1	TRUE	0.0169443	3392	57	24	0.421053	0.00707547	TF:M11183	TF	Factor: MyoD; motif: CGNCAGSTGTTN	19959	5410	TF:M00000	5	1.77098	0.00707547
query_1	TRUE	0.0192089	10448	57	46	0.807018	0.00440276	TF:M00803_1	TF	Factor: E2F; motif: GGCGSG; match class: 1	19959	1547	TF:M00803	5	1.7165	0.00440276
query_1	TRUE	0.0333315	3525	57	24	0.421053	0.00680851	TF:M11181	TF	Factor: MyoD; motif: CGNCAGSTGTYN	19959	5406	TF:M00000	5	1.47714	0.00680851
query_1	TRUE	0.0480516	7430	57	37	0.649123	0.00497981	TF:M01175	TF	Factor: CKROX; motif: SCCCTCCCC	19959	850	TF:M00000	5	1.31829	0.00497981
query_1	TRUE	0.0353659	5718	48	27	0.5625	0.00472193	GO:0048856	GO:BP	anatomical structure development	21029	15160	GO:0032502	6	1.45141	0.00472193
query_1	TRUE	0.0361303	147	48	5	0.104167	0.0340136	GO:0010976	GO:BP	positive regulation of neuron projection development	21029	5095	GO:0010975|GO:0031175|GO:0031346	6	1.44213	0.0340136
query_1	TRUE	0.0482186	26	48	3	0.0625	0.115385	GO:0002026	GO:BP	regulation of the force of heart contraction	21029	745	GO:0008016|GO:0065008	6	1.31679	0.115385
query_1	TRUE	0.0102842	82	51	4	0.0784314	0.0487805	GO:0005901	GO:CC	caveola	21672	529	GO:0044853	6	1.98783	0.0487805
query_1	TRUE	0.0358808	113	51	4	0.0784314	0.0353982	GO:0044853	GO:CC	plasma membrane raft	21672	2419	GO:0045121|GO:0098590	6	1.44514	0.0353982
query_1	TRUE	0.0163396	2	18	2	0.111111	1	HP:0006407	HP	Irregular distal femoral epiphysis	4667	4210	HP:0006361|HP:0010590	6	1.78676	1
query_1	TRUE	0.0378329	175	18	6	0.333333	0.0342857	HP:0100840	HP	Aplasia/Hypoplasia of the eyebrow	4667	15308	HP:0000534	6	1.42213	0.0342857
query_1	TRUE	0.0489066	3	18	2	0.111111	0.666667	HP:0010590	HP	Abnormality of the distal femoral epiphysis	4667	7065	HP:0006499	6	1.31063	0.666667
query_1	TRUE	0.000299083	91	23	5	0.217391	0.0549451	KEGG:04970	KEGG	Salivary secretion	8014	380	KEGG:00000	6	3.52421	0.0549451
query_1	TRUE	0.000524687	102	23	5	0.217391	0.0490196	KEGG:04972	KEGG	Pancreatic secretion	8014	382	KEGG:00000	6	3.2801	0.0490196
query_1	TRUE	0.000550418	103	23	5	0.217391	0.0485437	KEGG:04974	KEGG	Protein digestion and absorption	8014	384	KEGG:00000	6	3.25931	0.0485437
query_1	TRUE	0.00340411	150	23	5	0.217391	0.0333333	KEGG:04261	KEGG	Adrenergic signaling in cardiomyocytes	8014	277	KEGG:00000	6	2.468	0.0333333
query_1	TRUE	0.00551829	166	23	5	0.217391	0.0301205	KEGG:04022	KEGG	cGMP-PKG signaling pathway	8014	232	KEGG:00000	6	2.2582	0.0301205
query_1	TRUE	0.00962732	98	23	4	0.173913	0.0408163	KEGG:04925	KEGG	Aldosterone synthesis and secretion	8014	361	KEGG:00000	6	2.01649	0.0408163
query_1	TRUE	0.0272291	53	23	3	0.130435	0.0566038	KEGG:04961	KEGG	Endocrine and other factor-regulated calcium reabsorption	8014	376	KEGG:00000	6	1.56497	0.0566038
query_1	TRUE	0.0392578	60	23	3	0.130435	0.05	KEGG:04978	KEGG	Mineral absorption	8014	388	KEGG:00000	6	1.40607	0.05
query_1	TRUE	0.000597361	2205	53	18	0.339623	0.00816327	GO:0120025	GO:CC	plasma membrane bounded cell projection	21672	3858	GO:0042995	7	3.22376	0.00816327
query_1	TRUE	0.00117538	2312	53	18	0.339623	0.00778547	GO:0042995	GO:CC	cell projection	21672	2089	GO:0110165	7	2.92982	0.00778547
query_1	TRUE	0.00378732	1347	53	13	0.245283	0.00965108	GO:0043005	GO:CC	neuron projection	21672	2090	GO:0120025	7	2.42167	0.00965108
query_1	TRUE	0.0414185	835	53	9	0.169811	0.0107784	GO:0036477	GO:CC	somatodendritic compartment	21672	1960	GO:0110165	7	1.38281	0.0107784
query_1	TRUE	0.0158047	4	50	2	0.04	0.5	GO:0005173	GO:MF	stem cell factor receptor binding	20166	1668	GO:0005126	7	1.80121	0.5
query_1	TRUE	0.0325672	33	50	3	0.06	0.0909091	GO:0030291	GO:MF	protein serine/threonine kinase inhibitor activity	20166	4788	GO:0004860	7	1.48722	0.0909091
query_1	TRUE	0.000459049	259	25	7	0.28	0.027027	REAC:R-HSA-112315	REAC	Transmission across Chemical Synapses	10760	2381	REAC:R-HSA-112316	7	3.33814	0.027027
query_1	TRUE	0.0006759	400	25	8	0.32	0.02	REAC:R-HSA-112316	REAC	Neuronal System	10760	1465	REAC:0000000	7	3.17012	0.02
query_1	TRUE	0.015527	89	25	4	0.16	0.0449438	REAC:R-HSA-442755	REAC	Activation of NMDA receptors and postsynaptic events	10760	85	REAC:R-HSA-112314	7	1.80891	0.0449438
query_1	TRUE	0.0241222	196	25	5	0.2	0.0255102	REAC:R-HSA-112314	REAC	Neurotransmitter receptors and postsynaptic signal transmission	10760	1469	REAC:R-HSA-112315	7	1.61758	0.0255102
query_1	TRUE	0.0247757	6	25	2	0.08	0.333333	REAC:R-HSA-6802953	REAC	RAS signaling downstream of NF1 loss-of-function variants	10760	1708	REAC:R-HSA-6802957	7	1.60597	0.333333
query_1	TRUE	0.00662739	4244	54	27	0.5	0.00636192	TF:M10086_1	TF	Factor: TAFII250; motif: RARRWGGCGGMGGNGR; match class: 1	19959	8167	TF:M10086	7	2.17866	0.00636192
query_1	TRUE	0.0367156	10659	54	44	0.814815	0.00412797	TF:M00695	TF	Factor: ETF; motif: GVGGMGG	19959	2160	TF:M00000	7	1.43515	0.00412797
query_1	TRUE	0.0378636	7194	54	35	0.648148	0.00486517	TF:M00695_1	TF	Factor: ETF; motif: GVGGMGG; match class: 1	19959	2161	TF:M00695	7	1.42178	0.00486517
query_1	TRUE	0.00762716	80	16	5	0.3125	0.0625	CORUM:306	CORUM	Ribosome, cytoplasmic	3627	183	CORUM:0000000	8	2.11764	0.0625
query_1	TRUE	0.0499679	4	16	2	0.125	0.5	CORUM:6984	CORUM	ProTalpha C2 complex	3627	2499	CORUM:0000000	8	1.30131	0.5
query_1	TRUE	4.08569e-05	142	46	7	0.152174	0.0492958	GO:0007272	GO:BP	ensheathment of neurons	21029	3165	GO:0007399|GO:0009987	8	4.38874	0.0492958
query_1	TRUE	4.08569e-05	142	46	7	0.152174	0.0492958	GO:0008366	GO:BP	axon ensheathment	21029	3607	GO:0007272	8	4.38874	0.0492958
query_1	TRUE	0.00101425	140	46	6	0.130435	0.0428571	GO:0042552	GO:BP	myelination	21029	11835	GO:0008366	8	2.99385	0.0428571
query_1	TRUE	0.00294494	5718	46	28	0.608696	0.00489682	GO:0048856	GO:BP	anatomical structure development	21029	15160	GO:0032502	8	2.53092	0.00489682
query_1	TRUE	0.00835848	953	46	11	0.23913	0.0115425	GO:0031175	GO:BP	neuron projection development	21029	8222	GO:0048666|GO:0120036	8	2.07787	0.0115425
query_1	TRUE	0.0120969	2428	46	17	0.369565	0.00700165	GO:0007399	GO:BP	nervous system development	21029	3278	GO:0048731	8	1.91733	0.00700165
query_1	TRUE	0.0139455	477	46	8	0.173913	0.0167715	GO:0061564	GO:BP	axon development	21029	18272	GO:0031175	8	1.85557	0.0167715
query_1	TRUE	0.0191432	1040	46	11	0.23913	0.0105769	GO:0007417	GO:BP	central nervous system development	21029	3293	GO:0007399|GO:0048731	8	1.71798	0.0105769
query_1	TRUE	0.0238464	680	46	9	0.195652	0.0132353	GO:0051129	GO:BP	negative regulation of cellular component organization	21029	15614	GO:0016043|GO:0048523|GO:0051128	8	1.62258	0.0132353
query_1	TRUE	0.0252617	22	46	3	0.0652174	0.136364	GO:0032291	GO:BP	axon ensheathment in central nervous system	21029	8666	GO:0008366	8	1.59754	0.136364
query_1	TRUE	0.0252617	22	46	3	0.0652174	0.136364	GO:0022010	GO:BP	central nervous system myelination	21029	7552	GO:0014003|GO:0032291|GO:0042552	8	1.59754	0.136364
query_1	TRUE	0.025276	6326	46	28	0.608696	0.00442618	GO:0032502	GO:BP	developmental process	21029	8814	GO:0008150	8	1.59729	0.00442618
query_1	TRUE	0.0302237	148	46	5	0.108696	0.0337838	GO:0002181	GO:BP	cytoplasmic translation	21029	850	GO:0006412	8	1.51965	0.0337838
query_1	TRUE	0.0334755	1104	46	11	0.23913	0.00996377	GO:0048666	GO:BP	neuron development	21029	14981	GO:0030182|GO:0048468	8	1.47527	0.00996377
query_1	TRUE	0.0483804	80	46	4	0.0869565	0.05	GO:0048678	GO:BP	response to axon injury	21029	14992	GO:0009611	8	1.31533	0.05
query_1	TRUE	3.495e-11	2110	48	25	0.520833	0.0118483	GO:0070062	GO:CC	extracellular exosome	21672	2739	GO:0005615|GO:1903561	8	10.4566	0.0118483
query_1	TRUE	4.4257e-11	2132	48	25	0.520833	0.0117261	GO:1903561	GO:CC	extracellular vesicle	21672	4067	GO:0031982|GO:0065010	8	10.354	0.0117261
query_1	TRUE	4.47316e-11	2133	48	25	0.520833	0.0117206	GO:0043230	GO:CC	extracellular organelle	21672	2127	GO:0005576|GO:0043226	8	10.3494	0.0117206
query_1	TRUE	4.47316e-11	2133	48	25	0.520833	0.0117206	GO:0065010	GO:CC	extracellular membrane-bounded organelle	21672	2715	GO:0043227|GO:0043230	8	10.3494	0.0117206
query_1	TRUE	9.3627e-07	3353	48	25	0.520833	0.00745601	GO:0005615	GO:CC	extracellular space	21672	277	GO:0005576|GO:0110165	8	6.0286	0.00745601
query_1	TRUE	5.11594e-06	3942	48	26	0.541667	0.00659564	GO:0031982	GO:CC	vesicle	21672	1451	GO:0043227	8	5.29107	0.00659564
query_1	TRUE	1.14884e-05	45	48	5	0.104167	0.111111	GO:0043209	GO:CC	myelin sheath	21672	2117	GO:0110165	8	4.93974	0.111111
query_1	TRUE	2.57035e-05	104	48	6	0.125	0.0576923	GO:0022626	GO:CC	cytosolic ribosome	21672	1014	GO:0005829|GO:0005840	8	4.59001	0.0576923
query_1	TRUE	0.000153328	4303	48	25	0.520833	0.0058099	GO:0005576	GO:CC	extracellular region	21672	240	GO:0110165	8	3.81438	0.0058099
query_1	TRUE	0.000767218	12193	48	42	0.875	0.0034446	GO:0005737	GO:CC	cytoplasm	21672	384	GO:0005622|GO:0110165	8	3.11508	0.0034446
query_1	TRUE	0.00187005	988	48	11	0.229167	0.0111336	GO:0099512	GO:CC	supramolecular fiber	21672	3777	GO:0099081	8	2.72815	0.0111336
query_1	TRUE	0.00201821	996	48	11	0.229167	0.0110442	GO:0099081	GO:CC	supramolecular polymer	21672	3747	GO:0099080	8	2.69503	0.0110442
query_1	TRUE	0.0101194	432	48	7	0.145833	0.0162037	GO:0005874	GO:CC	microtubule	21672	504	GO:0015630|GO:0099513	8	1.99485	0.0162037
query_1	TRUE	0.0111756	5	48	2	0.0416667	0.4	GO:0035749	GO:CC	myelin sheath adaxonal region	21672	1873	GO:0043209|GO:0110165	8	1.95173	0.4
query_1	TRUE	0.0141199	189	48	5	0.104167	0.026455	GO:0044391	GO:CC	ribosomal subunit	21672	2330	GO:0005840|GO:1990904	8	1.85017	0.026455
query_1	TRUE	0.0159239	633	48	8	0.166667	0.0126382	GO:0030424	GO:CC	axon	21672	1098	GO:0043005	8	1.79795	0.0126382
query_1	TRUE	0.0286581	1330	48	11	0.229167	0.00827068	GO:0099080	GO:CC	supramolecular complex	21672	3746	GO:0110165	8	1.54275	0.00827068
query_1	TRUE	0.0332739	5373	48	24	0.5	0.00446678	GO:0005829	GO:CC	cytosol	21672	469	GO:0005737|GO:0110165	8	1.4779	0.00446678
query_1	TRUE	0.0360737	47	48	3	0.0625	0.0638298	GO:0022627	GO:CC	cytosolic small ribosomal subunit	21672	1015	GO:0015935|GO:0022626	8	1.44281	0.0638298
query_1	TRUE	0.000961721	980	48	12	0.25	0.0122449	GO:0005198	GO:MF	structural molecule activity	20166	1690	GO:0003674	8	3.01695	0.0122449
query_1	TRUE	0.0329598	50	17	4	0.235294	0.08	HP:0030890	HP	Hyperintensity of cerebral white matter on MRI	4667	10940	HP:0002500	8	1.48202	0.08
query_1	TRUE	5.51331e-08	176	38	10	0.263158	0.0568182	HPA:0091022	HPA	cerebellum; processes in granular layer[â‰¥Medium]	10976	159	HPA:0091021	8	7.25859	0.0568182
query_1	TRUE	2.34301e-07	204	38	10	0.263158	0.0490196	HPA:0091021	HPA	cerebellum; processes in granular layer[â‰¥Low]	10976	158	HPA:0090000	8	6.63023	0.0490196
query_1	TRUE	5.56557e-07	223	38	10	0.263158	0.044843	HPA:0091072	HPA	cerebellum; white matter cells - cytoplasm/membrane[â‰¥Medium]	10976	177	HPA:0091071	8	6.25449	0.044843
query_1	TRUE	1.1856e-06	120	38	8	0.210526	0.0666667	HPA:0091073	HPA	cerebellum; white matter cells - cytoplasm/membrane[High]	10976	178	HPA:0091072	8	5.92606	0.0666667
query_1	TRUE	6.67288e-06	289	38	10	0.263158	0.0346021	HPA:0091071	HPA	cerebellum; white matter cells - cytoplasm/membrane[â‰¥Low]	10976	176	HPA:0090000	8	5.17569	0.0346021
query_1	TRUE	2.07063e-05	114	38	7	0.184211	0.0614035	HPA:0091023	HPA	cerebellum; processes in granular layer[High]	10976	160	HPA:0091022	8	4.6839	0.0614035
query_1	TRUE	2.60803e-05	178	38	8	0.210526	0.0449438	HPA:0091042	HPA	cerebellum; processes in white matter[â‰¥Medium]	10976	165	HPA:0091041	8	4.58369	0.0449438
query_1	TRUE	3.81076e-05	75	38	6	0.157895	0.08	HPA:0091083	HPA	cerebellum; white matter cells - nucleus[High]	10976	181	HPA:0091082	8	4.41899	0.08
query_1	TRUE	8.00849e-05	206	38	8	0.210526	0.038835	HPA:0091041	HPA	cerebellum; processes in white matter[â‰¥Low]	10976	164	HPA:0090000	8	4.09645	0.038835
query_1	TRUE	0.000327547	676	38	12	0.315789	0.0177515	HPA:0271141	HPA	kidney; proximal tubules (cell body)[â‰¥Low]	10976	398	HPA:0270000	8	3.48473	0.0177515
query_1	TRUE	0.000341664	26	38	4	0.105263	0.153846	HPA:0091053	HPA	cerebellum; synaptic glomeruli - capsule[High]	10976	172	HPA:0091052	8	3.4664	0.153846
query_1	TRUE	0.000434671	113	38	6	0.157895	0.0530973	HPA:0091082	HPA	cerebellum; white matter cells - nucleus[â‰¥Medium]	10976	180	HPA:0091081	8	3.36184	0.0530973
query_1	TRUE	0.000458913	834	38	13	0.342105	0.0155875	HPA:0471442	HPA	skin 2; fibrohistiocytic cells[â‰¥Medium]	10976	680	HPA:0471441	8	3.33827	0.0155875
query_1	TRUE	0.000617473	120	38	6	0.157895	0.05	HPA:0091081	HPA	cerebellum; white matter cells - nucleus[â‰¥Low]	10976	179	HPA:0090000	8	3.20938	0.05
query_1	TRUE	0.0007603	1022	38	14	0.368421	0.0136986	HPA:0471441	HPA	skin 2; fibrohistiocytic cells[â‰¥Low]	10976	679	HPA:0470000	8	3.11901	0.0136986
query_1	TRUE	0.00218545	544	38	10	0.263158	0.0183824	HPA:0401331	HPA	rectum; mucosal lymphoid cells[â‰¥Low]	10976	543	HPA:0400000	8	2.66046	0.0183824
query_1	TRUE	0.00310058	698	38	11	0.289474	0.0157593	HPA:0461442	HPA	skin 1; fibrohistiocytic cells[â‰¥Medium]	10976	628	HPA:0461441	8	2.50856	0.0157593
query_1	TRUE	0.004225	99	38	5	0.131579	0.0505051	HPA:0091043	HPA	cerebellum; processes in white matter[High]	10976	166	HPA:0091042	8	2.37417	0.0505051
query_1	TRUE	0.00518039	884	38	12	0.315789	0.0135747	HPA:0461441	HPA	skin 1; fibrohistiocytic cells[â‰¥Low]	10976	627	HPA:0460000	8	2.28564	0.0135747
query_1	TRUE	0.00563799	2610	38	21	0.552632	0.00804598	HPA:0100212	HPA	cerebral cortex; neuropil[â‰¥Medium]	10976	196	HPA:0100211	8	2.24888	0.00804598
query_1	TRUE	0.0069322	1993	38	18	0.473684	0.00903161	HPA:0250122	HPA	hippocampus; glial cells[â‰¥Medium]	10976	358	HPA:0250121	8	2.15913	0.00903161
query_1	TRUE	0.00878105	508	38	9	0.236842	0.0177165	HPA:0131331	HPA	colon; mucosal lymphoid cells[â‰¥Low]	10976	237	HPA:0130000	8	2.05645	0.0177165
query_1	TRUE	0.0103457	398	38	8	0.210526	0.0201005	HPA:0401332	HPA	rectum; mucosal lymphoid cells[â‰¥Medium]	10976	544	HPA:0401331	8	1.98524	0.0201005
query_1	TRUE	0.0105377	520	38	9	0.236842	0.0173077	HPA:0271142	HPA	kidney; proximal tubules (cell body)[â‰¥Medium]	10976	399	HPA:0271141	8	1.97725	0.0173077
query_1	TRUE	0.0133076	2303	38	19	0.5	0.00825011	HPA:0080122	HPA	caudate; glial cells[â‰¥Medium]	10976	92	HPA:0080121	8	1.8759	0.00825011
query_1	TRUE	0.0156428	130	38	5	0.131579	0.0384615	HPA:0090973	HPA	cerebellum; granular cells - cytoplasm/membrane[High]	10976	142	HPA:0090972	8	1.80569	0.0384615
query_1	TRUE	0.0198617	71	38	4	0.105263	0.056338	HPA:0091052	HPA	cerebellum; synaptic glomeruli - capsule[â‰¥Medium]	10976	171	HPA:0091051	8	1.70198	0.056338
query_1	TRUE	0.0207349	4989	38	29	0.763158	0.00581279	HPA:0100211	HPA	cerebral cortex; neuropil[â‰¥Low]	10976	195	HPA:0100000	8	1.6833	0.00581279
query_1	TRUE	0.0246007	75	38	4	0.105263	0.0533333	HPA:0471381	HPA	skin 2; arrector pili muscle cells[â‰¥Low]	10976	652	HPA:0470000	8	1.60905	0.0533333
query_1	TRUE	0.0252772	231	38	6	0.157895	0.025974	HPA:0090972	HPA	cerebellum; granular cells - cytoplasm/membrane[â‰¥Medium]	10976	141	HPA:0090971	8	1.59727	0.025974
query_1	TRUE	0.0270807	146	38	5	0.131579	0.0342466	HPA:0090981	HPA	cerebellum; granular cells - nucleus[â‰¥Low]	10976	143	HPA:0090000	8	1.56734	0.0342466
query_1	TRUE	0.0418257	86	38	4	0.105263	0.0465116	HPA:0090983	HPA	cerebellum; granular cells - nucleus[High]	10976	145	HPA:0090982	8	1.37856	0.0465116
query_1	TRUE	0.0434432	365	38	7	0.184211	0.0191781	HPA:0131332	HPA	colon; mucosal lymphoid cells[â‰¥Medium]	10976	238	HPA:0131331	8	1.36208	0.0191781
query_1	TRUE	0.00883454	153	27	5	0.185185	0.0326797	KEGG:03010	KEGG	Ribosome	8014	204	KEGG:00000	8	2.05382	0.0326797
query_1	TRUE	0.00130232	574	32	10	0.3125	0.0174216	REAC:R-HSA-9675108	REAC	Nervous system development	10760	1459	REAC:R-HSA-1266738	8	2.88528	0.0174216
query_1	TRUE	0.00209781	90	32	5	0.15625	0.0555556	REAC:R-HSA-192823	REAC	Viral mRNA Translation	10760	2447	REAC:R-HSA-168273	8	2.67823	0.0555556
query_1	TRUE	0.00209781	90	32	5	0.15625	0.0555556	REAC:R-HSA-156902	REAC	Peptide chain elongation	10760	1590	REAC:R-HSA-156842	8	2.67823	0.0555556
query_1	TRUE	0.00239909	765	32	11	0.34375	0.0143791	REAC:R-HSA-8953897	REAC	Cellular responses to stimuli	10760	319	REAC:0000000	8	2.61995	0.0143791
query_1	TRUE	0.00259819	94	32	5	0.15625	0.0531915	REAC:R-HSA-2408557	REAC	Selenocysteine synthesis	10760	2006	REAC:R-HSA-2408522	8	2.58533	0.0531915
query_1	TRUE	0.00259819	94	32	5	0.15625	0.0531915	REAC:R-HSA-156842	REAC	Eukaryotic Translation Elongation	10760	807	REAC:R-HSA-72766	8	2.58533	0.0531915
query_1	TRUE	0.00259819	94	32	5	0.15625	0.0531915	REAC:R-HSA-72764	REAC	Eukaryotic Translation Termination	10760	809	REAC:R-HSA-72766	8	2.58533	0.0531915
query_1	TRUE	0.00288111	96	32	5	0.15625	0.0520833	REAC:R-HSA-975956	REAC	Nonsense Mediated Decay (NMD) independent of the Exon Junction Complex (EJC)	10760	1482	REAC:R-HSA-927802	8	2.54044	0.0520833
query_1	TRUE	0.00322825	171	32	6	0.1875	0.0350877	REAC:R-HSA-9010553	REAC	Regulation of expression of SLITs and ROBOs	10760	1868	REAC:R-HSA-376176	8	2.49103	0.0350877
query_1	TRUE	0.00387689	102	32	5	0.15625	0.0490196	REAC:R-HSA-9633012	REAC	Response of EIF2AK4 (GCN2) to amino acid deficiency	10760	1918	REAC:R-HSA-9711097	8	2.41152	0.0490196
query_1	TRUE	0.00387689	102	32	5	0.15625	0.0490196	REAC:R-HSA-72689	REAC	Formation of a pool of free 40S subunits	10760	885	REAC:R-HSA-72737	8	2.41152	0.0490196
query_1	TRUE	0.00611467	112	32	5	0.15625	0.0446429	REAC:R-HSA-156827	REAC	L13a-mediated translational silencing of Ceruloplasmin expression	10760	1197	REAC:R-HSA-72613	8	2.21363	0.0446429
query_1	TRUE	0.00638435	113	32	5	0.15625	0.0442478	REAC:R-HSA-72706	REAC	GTP hydrolysis and joining of the 60S ribosomal subunit	10760	947	REAC:R-HSA-72737	8	2.19488	0.0442478
query_1	TRUE	0.00638435	113	32	5	0.15625	0.0442478	REAC:R-HSA-1799339	REAC	SRP-dependent cotranslational protein targeting to membrane	10760	1976	REAC:R-HSA-72766	8	2.19488	0.0442478
query_1	TRUE	0.00724939	116	32	5	0.15625	0.0431034	REAC:R-HSA-975957	REAC	Nonsense Mediated Decay (NMD) enhanced by the Exon Junction Complex (EJC)	10760	1481	REAC:R-HSA-927802	8	2.1397	0.0431034
query_1	TRUE	0.00724939	116	32	5	0.15625	0.0431034	REAC:R-HSA-927802	REAC	Nonsense-Mediated Decay (NMD)	10760	1483	REAC:R-HSA-8953854	8	2.1397	0.0431034
query_1	TRUE	0.00728369	549	32	9	0.28125	0.0163934	REAC:R-HSA-422475	REAC	Axon guidance	10760	185	REAC:R-HSA-9675108	8	2.13765	0.0163934
query_1	TRUE	0.00755714	117	32	5	0.15625	0.042735	REAC:R-HSA-2408522	REAC	Selenoamino acid metabolism	10760	2005	REAC:R-HSA-71291	8	2.12164	0.042735
query_1	TRUE	0.00854187	120	32	5	0.15625	0.0416667	REAC:R-HSA-72737	REAC	Cap-dependent Translation Initiation	10760	287	REAC:R-HSA-72613	8	2.06845	0.0416667
query_1	TRUE	0.00854187	120	32	5	0.15625	0.0416667	REAC:R-HSA-72613	REAC	Eukaryotic Translation Initiation	10760	808	REAC:R-HSA-72766	8	2.06845	0.0416667
query_1	TRUE	0.0124813	217	32	6	0.1875	0.0276498	REAC:R-HSA-376176	REAC	Signaling by ROBO receptors	10760	2115	REAC:R-HSA-422475	8	1.90374	0.0276498
query_1	TRUE	0.0138157	751	32	10	0.3125	0.0133156	REAC:R-HSA-2262752	REAC	Cellular responses to stress	10760	320	REAC:R-HSA-8953897	8	1.85963	0.0133156
query_1	TRUE	0.0140178	133	32	5	0.15625	0.037594	REAC:R-HSA-168273	REAC	Influenza Viral RNA Transcription and Replication	10760	1093	REAC:R-HSA-168255	8	1.85332	0.037594
query_1	TRUE	0.0265148	152	32	5	0.15625	0.0328947	REAC:R-HSA-168255	REAC	Influenza Infection	10760	1092	REAC:R-HSA-5663205	8	1.57651	0.0328947
query_1	TRUE	0.0309128	157	32	5	0.15625	0.0318471	REAC:R-HSA-9711097	REAC	Cellular response to starvation	10760	318	REAC:R-HSA-2262752	8	1.50986	0.0318471
query_1	TRUE	0.0286062	216	48	6	0.125	0.0277778	TF:M11656_1	TF	Factor: HSF1; motif: RGAANRTTCYRGAAN; match class: 1	19959	4137	TF:M11656	8	1.54354	0.0277778
query_1	TRUE	0.000446052	8	33	3	0.0909091	0.375	WP:WP2276	WP	Glial cell differentiation	7806	469	WP:000000	8	3.35061	0.375
query_1	TRUE	0.00393358	90	33	5	0.151515	0.0555556	WP:WP477	WP	Cytoplasmic ribosomal proteins	7806	673	WP:000000	8	2.40521	0.0555556
query_1	TRUE	0.0335063	31	33	3	0.0909091	0.0967742	WP:WP4304	WP	Oligodendrocyte specification and differentiation, leading to myelin components for CNS	7806	64	WP:000000	8	1.47487	0.0967742
query_1	TRUE	0.00238973	2	11	2	0.181818	1	CORUM:595	CORUM	Kv4.2-DPP10 channel complex	3627	330	CORUM:0000000	9	2.62165	1
query_1	TRUE	0.00715733	3	11	2	0.181818	0.666667	CORUM:5534	CORUM	PLCB1-PARD3-PARD6A complex	3627	1715	CORUM:0000000	9	2.14525	0.666667
query_1	TRUE	3.38885e-09	2428	46	25	0.543478	0.0102965	GO:0007399	GO:BP	nervous system development	21029	3278	GO:0048731	9	8.46995	0.0102965
query_1	TRUE	2.01197e-07	1519	46	19	0.413043	0.0125082	GO:0048699	GO:BP	generation of neurons	21029	15013	GO:0022008	9	6.69638	0.0125082
query_1	TRUE	7.35413e-07	1639	46	19	0.413043	0.0115924	GO:0022008	GO:BP	neurogenesis	21029	7550	GO:0007399|GO:0030154	9	6.13347	0.0115924
query_1	TRUE	1.57413e-06	4784	46	30	0.652174	0.0062709	GO:0048731	GO:BP	system development	21029	15045	GO:0007275|GO:0048856	9	5.80296	0.0062709
query_1	TRUE	2.87139e-06	1364	46	17	0.369565	0.0124633	GO:0030182	GO:BP	neuron differentiation	21029	7736	GO:0030154|GO:0048699	9	5.54191	0.0124633
query_1	TRUE	3.39261e-06	561	46	12	0.26087	0.0213904	GO:0034762	GO:BP	regulation of transmembrane transport	21029	10048	GO:0050794|GO:0051049|GO:0055085	9	5.46947	0.0213904
query_1	TRUE	4.87833e-06	1040	46	15	0.326087	0.0144231	GO:0007417	GO:BP	central nervous system development	21029	3293	GO:0007399|GO:0048731	9	5.31173	0.0144231
query_1	TRUE	6.904e-06	897	46	14	0.304348	0.0156076	GO:0098655	GO:BP	cation transmembrane transport	21029	22028	GO:0006812|GO:0034220	9	5.1609	0.0156076
query_1	TRUE	8.01932e-06	476	46	11	0.23913	0.0231092	GO:0034765	GO:BP	regulation of ion transmembrane transport	21029	10051	GO:0034220|GO:0034762|GO:0043269	9	5.09586	0.0231092
query_1	TRUE	8.5681e-06	5114	46	30	0.652174	0.00586625	GO:0007275	GO:BP	multicellular organism development	21029	3168	GO:0032501|GO:0048856	9	5.06712	0.00586625
query_1	TRUE	1.09589e-05	1104	46	15	0.326087	0.013587	GO:0048666	GO:BP	neuron development	21029	14981	GO:0030182|GO:0048468	9	4.96023	0.013587
query_1	TRUE	1.26798e-05	1116	46	15	0.326087	0.0134409	GO:0034220	GO:BP	ion transmembrane transport	21029	9784	GO:0006811|GO:0055085	9	4.89689	0.0134409
query_1	TRUE	1.49317e-05	953	46	14	0.304348	0.0146905	GO:0031175	GO:BP	neuron projection development	21029	8222	GO:0048666|GO:0120036	9	4.82589	0.0146905
query_1	TRUE	1.8625e-05	1544	46	17	0.369565	0.0110104	GO:0006811	GO:BP	ion transport	21029	2769	GO:0006810	9	4.7299	0.0110104
query_1	TRUE	2.50471e-05	1174	46	15	0.326087	0.0127768	GO:0006812	GO:BP	cation transport	21029	2770	GO:0006811	9	4.60124	0.0127768
query_1	TRUE	2.57063e-05	5718	46	31	0.673913	0.00542148	GO:0048856	GO:BP	anatomical structure development	21029	15160	GO:0032502	9	4.58996	0.00542148
query_1	TRUE	2.70841e-05	209	46	8	0.173913	0.0382775	GO:0050807	GO:BP	regulation of synapse organization	21029	15351	GO:0050803|GO:0050808|GO:0051128	9	4.56728	0.0382775
query_1	TRUE	3.00161e-05	682	46	12	0.26087	0.0175953	GO:0043269	GO:BP	regulation of ion transport	21029	12224	GO:0006811|GO:0051049	9	4.52265	0.0175953
query_1	TRUE	3.37681e-05	215	46	8	0.173913	0.0372093	GO:0050803	GO:BP	regulation of synapse structure or activity	21029	15347	GO:0065008	9	4.47149	0.0372093
query_1	TRUE	3.85132e-05	2079	46	19	0.413043	0.00913901	GO:0048468	GO:BP	cell development	21029	14819	GO:0030154|GO:0048856|GO:0048869	9	4.41439	0.00913901
query_1	TRUE	4.00324e-05	7474	46	35	0.76087	0.0046829	GO:0032501	GO:BP	multicellular organismal process	21029	8813	GO:0008150	9	4.39759	0.0046829
query_1	TRUE	4.26109e-05	704	46	12	0.26087	0.0170455	GO:0098916	GO:BP	anterograde trans-synaptic signaling	21029	22182	GO:0099537	9	4.37048	0.0170455
query_1	TRUE	4.26109e-05	704	46	12	0.26087	0.0170455	GO:0007268	GO:BP	chemical synaptic transmission	21029	3161	GO:0098916	9	4.37048	0.0170455
query_1	TRUE	4.77696e-05	436	46	10	0.217391	0.0229358	GO:0050804	GO:BP	modulation of chemical synaptic transmission	21029	15348	GO:0007268|GO:0099177	9	4.32085	0.0229358
query_1	TRUE	4.82561e-05	712	46	12	0.26087	0.0168539	GO:0099537	GO:BP	trans-synaptic signaling	21029	22352	GO:0099536	9	4.31645	0.0168539
query_1	TRUE	4.88113e-05	437	46	10	0.217391	0.0228833	GO:0099177	GO:BP	regulation of trans-synaptic signaling	21029	22321	GO:0010646|GO:0023051|GO:0099537	9	4.31148	0.0228833
query_1	TRUE	5.37644e-05	880	46	13	0.282609	0.0147727	GO:0030001	GO:BP	metal ion transport	21029	7671	GO:0006812	9	4.2695	0.0147727
query_1	TRUE	5.88815e-05	4128	46	26	0.565217	0.00629845	GO:0030154	GO:BP	cell differentiation	21029	7722	GO:0048869	9	4.23002	0.00629845
query_1	TRUE	6.94522e-05	736	46	12	0.26087	0.0163043	GO:0099536	GO:BP	synaptic signaling	21029	22351	GO:0007267	9	4.15831	0.0163043
query_1	TRUE	8.41324e-05	749	46	12	0.26087	0.0160214	GO:0032989	GO:BP	cellular component morphogenesis	21029	9185	GO:0009653|GO:0016043|GO:0048869	9	4.07504	0.0160214
query_1	TRUE	8.44307e-05	2701	46	21	0.456522	0.0077749	GO:0032879	GO:BP	regulation of localization	21029	9091	GO:0050789|GO:0051179	9	4.0735	0.0077749
query_1	TRUE	8.9695e-05	4210	46	26	0.565217	0.00617577	GO:0048869	GO:BP	cellular developmental process	21029	15172	GO:0009987|GO:0032502	9	4.04723	0.00617577
query_1	TRUE	0.000110272	164	46	7	0.152174	0.0426829	GO:0001764	GO:BP	neuron migration	21029	542	GO:0016477|GO:0048699	9	3.95754	0.0426829
query_1	TRUE	0.000118647	619	46	11	0.23913	0.0177706	GO:0048812	GO:BP	neuron projection morphogenesis	21029	15117	GO:0031175|GO:0120039	9	3.92574	0.0177706
query_1	TRUE	0.000140412	785	46	12	0.26087	0.0152866	GO:0098662	GO:BP	inorganic cation transmembrane transport	21029	22035	GO:0098655|GO:0098660	9	3.8526	0.0152866
query_1	TRUE	0.000151151	634	46	11	0.23913	0.0173502	GO:0120039	GO:BP	plasma membrane bounded cell projection morphogenesis	21029	22798	GO:0048858	9	3.82059	0.0173502
query_1	TRUE	0.00016106	638	46	11	0.23913	0.0172414	GO:0048858	GO:BP	cell projection morphogenesis	21029	15162	GO:0000902|GO:0030030|GO:0032990	9	3.79301	0.0172414
query_1	TRUE	0.000216474	657	46	11	0.23913	0.0167428	GO:0032990	GO:BP	cell part morphogenesis	21029	9186	GO:0032989	9	3.66459	0.0167428
query_1	TRUE	0.000268017	1010	46	13	0.282609	0.0128713	GO:0000902	GO:BP	cell morphogenesis	21029	306	GO:0009653	9	3.57184	0.0128713
query_1	TRUE	0.000332226	850	46	12	0.26087	0.0141176	GO:0098660	GO:BP	inorganic ion transmembrane transport	21029	22033	GO:0034220	9	3.47857	0.0141176
query_1	TRUE	0.000333677	6326	46	31	0.673913	0.00490041	GO:0032502	GO:BP	developmental process	21029	8814	GO:0008150	9	3.47667	0.00490041
query_1	TRUE	0.00044929	419	46	9	0.195652	0.0214797	GO:0042391	GO:BP	regulation of membrane potential	21029	11729	GO:0065008	9	3.34747	0.0214797
query_1	TRUE	0.000477082	422	46	9	0.195652	0.021327	GO:0050808	GO:BP	synapse organization	21029	15352	GO:0034330	9	3.32141	0.021327
query_1	TRUE	0.000569634	431	46	9	0.195652	0.0208817	GO:0007409	GO:BP	axonogenesis	21029	3286	GO:0048667|GO:0048812|GO:0061564	9	3.2444	0.0208817
query_1	TRUE	0.00059517	1719	46	16	0.347826	0.00930774	GO:0051049	GO:BP	regulation of transport	21029	15555	GO:0006810|GO:0032879	9	3.22536	0.00930774
query_1	TRUE	0.000815254	1531	46	15	0.326087	0.00979752	GO:0055085	GO:BP	transmembrane transport	21029	16803	GO:0006810|GO:0009987	9	3.08871	0.00979752
query_1	TRUE	0.000892861	137	46	6	0.130435	0.0437956	GO:0001508	GO:BP	action potential	21029	429	GO:0042391	9	3.04922	0.0437956
query_1	TRUE	0.00118412	342	46	8	0.173913	0.0233918	GO:1904062	GO:BP	regulation of cation transmembrane transport	21029	27063	GO:0034765|GO:0098655	9	2.9266	0.0233918
query_1	TRUE	0.00132882	477	46	9	0.195652	0.0188679	GO:0061564	GO:BP	axon development	21029	18272	GO:0031175	9	2.87654	0.0188679
query_1	TRUE	0.00222621	6425	46	30	0.652174	0.00466926	GO:0051179	GO:BP	localization	21029	15663	GO:0008150	9	2.65243	0.00466926
query_1	TRUE	0.00222856	2685	46	19	0.413043	0.00707635	GO:0009653	GO:BP	anatomical structure morphogenesis	21029	4023	GO:0032502|GO:0048856	9	2.65198	0.00707635
query_1	TRUE	0.00229962	161	46	6	0.130435	0.0372671	GO:0035637	GO:BP	multicellular organismal signaling	21029	10531	GO:0023052|GO:0032501	9	2.63834	0.0372671
query_1	TRUE	0.00314606	687	46	10	0.217391	0.014556	GO:0034330	GO:BP	cell junction organization	21029	9855	GO:0016043	9	2.50223	0.014556
query_1	TRUE	0.00322577	391	46	8	0.173913	0.0204604	GO:0010959	GO:BP	regulation of metal ion transport	21029	5079	GO:0030001|GO:0043269	9	2.49137	0.0204604
query_1	TRUE	0.0033199	1479	46	14	0.304348	0.00946586	GO:0120036	GO:BP	plasma membrane bounded cell projection organization	21029	22797	GO:0030030	9	2.47887	0.00946586
query_1	TRUE	0.00462035	1521	46	14	0.304348	0.00920447	GO:0030030	GO:BP	cell projection organization	21029	7682	GO:0016043	9	2.33533	0.00920447
query_1	TRUE	0.00466954	718	46	10	0.217391	0.0139276	GO:0000904	GO:BP	cell morphogenesis involved in differentiation	21029	308	GO:0000902|GO:0048468	9	2.33073	0.0139276
query_1	TRUE	0.00468812	182	46	6	0.130435	0.032967	GO:0007416	GO:BP	synapse assembly	21029	3292	GO:0007399|GO:0034329|GO:0050808	9	2.329	0.032967
query_1	TRUE	0.00491084	559	46	9	0.195652	0.0161002	GO:0048667	GO:BP	cell morphogenesis involved in neuron differentiation	21029	14982	GO:0000904|GO:0048666	9	2.30884	0.0161002
query_1	TRUE	0.00678964	3494	46	21	0.456522	0.0060103	GO:0048513	GO:BP	animal organ development	21029	14849	GO:0048731|GO:0048856	9	2.16815	0.0060103
query_1	TRUE	0.00820039	765	46	10	0.217391	0.0130719	GO:0007420	GO:BP	brain development	21029	3296	GO:0007417|GO:0048513|GO:0060322	9	2.08617	0.0130719
query_1	TRUE	0.0110868	618	46	9	0.195652	0.0145631	GO:0120035	GO:BP	regulation of plasma membrane bounded cell projection organization	21029	22796	GO:0031344|GO:0120036	9	1.95519	0.0145631
query_1	TRUE	0.011592	213	46	6	0.130435	0.028169	GO:0071805	GO:BP	potassium ion transmembrane transport	21029	19753	GO:0006813|GO:0098662	9	1.93584	0.028169
query_1	TRUE	0.0116125	1646	46	14	0.304348	0.00850547	GO:0007267	GO:BP	cell-cell signaling	21029	3160	GO:0007154|GO:0023052	9	1.93508	0.00850547
query_1	TRUE	0.0136196	634	46	9	0.195652	0.0141956	GO:0031344	GO:BP	regulation of cell projection organization	21029	8284	GO:0030030|GO:0051128	9	1.86583	0.0141956
query_1	TRUE	0.013859	812	46	10	0.217391	0.0123153	GO:0060322	GO:BP	head development	21029	17112	GO:0048856	9	1.85827	0.0123153
query_1	TRUE	0.0199153	2243	46	16	0.347826	0.0071333	GO:0003008	GO:BP	system process	21029	1584	GO:0032501	9	1.70081	0.0071333
query_1	TRUE	0.0218204	238	46	6	0.130435	0.0252101	GO:0006813	GO:BP	potassium ion transport	21029	2771	GO:0030001	9	1.66114	0.0252101
query_1	TRUE	0.0318751	72	46	4	0.0869565	0.0555556	GO:0019226	GO:BP	transmission of nerve impulse	21029	6481	GO:0007154|GO:0035637|GO:0050877	9	1.49655	0.0555556
query_1	TRUE	0.0365547	11067	46	38	0.826087	0.00343363	GO:0050794	GO:BP	regulation of cellular process	21029	15340	GO:0009987|GO:0050789	9	1.43706	0.00343363
query_1	TRUE	0.042389	26	46	3	0.0652174	0.115385	GO:0001964	GO:BP	startle response	21029	688	GO:0009605|GO:0050905	9	1.37275	0.115385
query_1	TRUE	3.97091e-13	373	48	15	0.3125	0.0402145	GO:0097060	GO:CC	synaptic membrane	21672	3243	GO:0045202|GO:0098590	9	12.4011	0.0402145
query_1	TRUE	2.20037e-11	1305	48	21	0.4375	0.016092	GO:0045202	GO:CC	synapse	21672	2443	GO:0030054	9	10.6575	0.016092
query_1	TRUE	2.41327e-11	2076	48	25	0.520833	0.0120424	GO:0030054	GO:CC	cell junction	21672	1025	GO:0110165	9	10.6174	0.0120424
query_1	TRUE	5.39919e-10	613	48	15	0.3125	0.0244698	GO:0098794	GO:CC	postsynapse	21672	3622	GO:0045202|GO:0110165	9	9.26767	0.0244698
query_1	TRUE	1.36116e-09	332	48	12	0.25	0.0361446	GO:0098978	GO:CC	glutamatergic synapse	21672	3694	GO:0045202	9	8.86609	0.0361446
query_1	TRUE	3.62158e-09	273	48	11	0.229167	0.040293	GO:0045211	GO:CC	postsynaptic membrane	21672	2445	GO:0097060|GO:0098794	9	8.4411	0.040293
query_1	TRUE	7.63493e-09	6181	48	36	0.75	0.0058243	GO:0071944	GO:CC	cell periphery	21672	3128	GO:0110165	9	8.11719	0.0058243
query_1	TRUE	2.097e-08	165	48	9	0.1875	0.0545455	GO:0099240	GO:CC	intrinsic component of synaptic membrane	21672	3771	GO:0031226|GO:0097060	9	7.6784	0.0545455
query_1	TRUE	3.19767e-08	5694	48	34	0.708333	0.0059712	GO:0005886	GO:CC	plasma membrane	21672	514	GO:0016020|GO:0071944	9	7.49517	0.0059712
query_1	TRUE	1.19295e-07	1237	48	17	0.354167	0.0137429	GO:0098590	GO:CC	plasma membrane region	21672	3579	GO:0005886|GO:0016020	9	6.92338	0.0137429
query_1	TRUE	3.56286e-07	153	48	8	0.166667	0.0522876	GO:0099699	GO:CC	integral component of synaptic membrane	21672	3794	GO:0005887|GO:0099240	9	6.4482	0.0522876
query_1	TRUE	2.27582e-06	1713	48	18	0.375	0.0105079	GO:0031226	GO:CC	intrinsic component of plasma membrane	21672	1237	GO:0005886|GO:0031224	9	5.64286	0.0105079
query_1	TRUE	6.39548e-06	221	48	8	0.166667	0.0361991	GO:0034703	GO:CC	cation channel complex	21672	1769	GO:0034702	9	5.19413	0.0361991
query_1	TRUE	7.59915e-06	1630	48	17	0.354167	0.0104294	GO:0005887	GO:CC	integral component of plasma membrane	21672	515	GO:0016021|GO:0031226	9	5.11923	0.0104294
query_1	TRUE	1.80096e-05	98	48	6	0.125	0.0612245	GO:0034705	GO:CC	potassium channel complex	21672	1771	GO:0034703	9	4.7445	0.0612245
query_1	TRUE	2.39253e-05	633	48	11	0.229167	0.0173776	GO:0030424	GO:CC	axon	21672	1098	GO:0043005	9	4.62114	0.0173776
query_1	TRUE	2.68712e-05	1347	48	15	0.3125	0.0111359	GO:0043005	GO:CC	neuron projection	21672	2090	GO:0120025	9	4.57071	0.0111359
query_1	TRUE	5.45189e-05	292	48	8	0.166667	0.0273973	GO:0034702	GO:CC	ion channel complex	21672	1768	GO:1902495	9	4.26345	0.0273973
query_1	TRUE	8.42785e-05	127	48	6	0.125	0.0472441	GO:0098936	GO:CC	intrinsic component of postsynaptic membrane	21672	3677	GO:0045211|GO:0099240	9	4.07428	0.0472441
query_1	TRUE	0.000114485	322	48	8	0.166667	0.0248447	GO:0014069	GO:CC	postsynaptic density	21672	823	GO:0032279|GO:0099572	9	3.94125	0.0248447
query_1	TRUE	0.000131609	328	48	8	0.166667	0.0243902	GO:0032279	GO:CC	asymmetric synapse	21672	1507	GO:0098984	9	3.88071	0.0243902
query_1	TRUE	0.000176608	144	48	6	0.125	0.0416667	GO:0042734	GO:CC	presynaptic membrane	21672	2078	GO:0097060|GO:0098793	9	3.75299	0.0416667
query_1	TRUE	0.00019676	346	48	8	0.166667	0.0231214	GO:0099572	GO:CC	postsynaptic specialization	21672	3787	GO:0043226|GO:0098794	9	3.70606	0.0231214
query_1	TRUE	0.000219093	2312	48	18	0.375	0.00778547	GO:0042995	GO:CC	cell projection	21672	2089	GO:0110165	9	3.65937	0.00778547
query_1	TRUE	0.000223856	352	48	8	0.166667	0.0227273	GO:0098984	GO:CC	neuron to neuron synapse	21672	3700	GO:0045202	9	3.65003	0.0227273
query_1	TRUE	0.000343082	88	48	5	0.104167	0.0568182	GO:0008076	GO:CC	voltage-gated potassium channel complex	21672	602	GO:0005887|GO:0034705|GO:0098797	9	3.4646	0.0568182
query_1	TRUE	0.000385647	9818	48	38	0.791667	0.00387044	GO:0016020	GO:CC	membrane	21672	849	GO:0110165	9	3.41381	0.00387044
query_1	TRUE	0.000412413	382	48	8	0.166667	0.0209424	GO:1902495	GO:CC	transmembrane transporter complex	21672	4013	GO:0016021|GO:0098796|GO:1990351	9	3.38467	0.0209424
query_1	TRUE	0.000526614	692	48	10	0.208333	0.0144509	GO:0098797	GO:CC	plasma membrane protein complex	21672	3624	GO:0005886|GO:0098796	9	3.27851	0.0144509
query_1	TRUE	0.000549019	397	48	8	0.166667	0.0201511	GO:1990351	GO:CC	transporter complex	21672	4267	GO:0032991	9	3.26041	0.0201511
query_1	TRUE	0.000703997	554	48	9	0.1875	0.0162455	GO:0044297	GO:CC	cell body	21672	2302	GO:0110165	9	3.15243	0.0162455
query_1	TRUE	0.000931631	1323	48	13	0.270833	0.00982615	GO:0098796	GO:CC	membrane protein complex	21672	3623	GO:0016020|GO:0032991	9	3.03076	0.00982615
query_1	TRUE	0.00164847	121	48	5	0.104167	0.0413223	GO:0099055	GO:CC	integral component of postsynaptic membrane	21672	3728	GO:0098936|GO:0099699	9	2.78292	0.0413223
query_1	TRUE	0.00205929	59	48	4	0.0833333	0.0677966	GO:0044304	GO:CC	main axon	21672	2309	GO:0030424|GO:0110165	9	2.68628	0.0677966
query_1	TRUE	0.00249423	488	48	8	0.166667	0.0163934	GO:0043025	GO:CC	neuronal cell body	21672	2092	GO:0036477|GO:0044297	9	2.60306	0.0163934
query_1	TRUE	0.0026854	493	48	8	0.166667	0.0162272	GO:0098793	GO:CC	presynapse	21672	3621	GO:0045202|GO:0110165	9	2.57099	0.0162272
query_1	TRUE	0.00275092	2205	48	16	0.333333	0.00725624	GO:0120025	GO:CC	plasma membrane bounded cell projection	21672	3858	GO:0042995	9	2.56052	0.00725624
query_1	TRUE	0.00625815	78	48	4	0.0833333	0.0512821	GO:0098889	GO:CC	intrinsic component of presynaptic membrane	21672	3664	GO:0042734|GO:0099240	9	2.20355	0.0512821
query_1	TRUE	0.00695615	273	48	6	0.125	0.021978	GO:0150034	GO:CC	distal axon	21672	3996	GO:0030424|GO:0110165	9	2.15763	0.021978
query_1	TRUE	0.0125695	612	48	8	0.166667	0.0130719	GO:0030425	GO:CC	dendrite	21672	1099	GO:0043005|GO:0097447	9	1.90068	0.0130719
query_1	TRUE	0.0128611	614	48	8	0.166667	0.0130293	GO:0097447	GO:CC	dendritic tree	21672	3353	GO:0036477|GO:0043005	9	1.89072	0.0130293
query_1	TRUE	0.0165298	5897	48	26	0.541667	0.00440902	GO:0031224	GO:CC	intrinsic component of membrane	21672	1235	GO:0016020|GO:0110165	9	1.78173	0.00440902
query_1	TRUE	0.0181808	835	48	9	0.1875	0.0107784	GO:0036477	GO:CC	somatodendritic compartment	21672	1960	GO:0110165	9	1.74039	0.0107784
query_1	TRUE	0.0315535	118	48	4	0.0833333	0.0338983	GO:0099634	GO:CC	postsynaptic specialization membrane	21672	3793	GO:0045211|GO:0097060|GO:0099572	9	1.50095	0.0338983
query_1	TRUE	0.0444692	129	48	4	0.0833333	0.0310078	GO:0044306	GO:CC	neuron projection terminus	21672	2311	GO:0043005|GO:0110165	9	1.35194	0.0310078
query_1	TRUE	2.60927e-05	434	48	10	0.208333	0.0230415	GO:0046873	GO:MF	metal ion transmembrane transporter activity	20166	7317	GO:0022890	9	4.58348	0.0230415
query_1	TRUE	0.000528726	602	48	10	0.208333	0.0166113	GO:0022890	GO:MF	inorganic cation transmembrane transporter activity	20166	4703	GO:0008324|GO:0015318	9	3.27677	0.0166113
query_1	TRUE	0.000531707	339	48	8	0.166667	0.0235988	GO:0005261	GO:MF	cation channel activity	20166	1738	GO:0005216|GO:0022890	9	3.27433	0.0235988
query_1	TRUE	0.00112749	655	48	10	0.208333	0.0152672	GO:0008324	GO:MF	cation transmembrane transporter activity	20166	2094	GO:0015075	9	2.94789	0.0152672
query_1	TRUE	0.0031263	735	48	10	0.208333	0.0136054	GO:0015318	GO:MF	inorganic molecular entity transmembrane transporter activity	20166	3106	GO:0022857	9	2.50497	0.0136054
query_1	TRUE	0.003356	435	48	8	0.166667	0.0183908	GO:0005216	GO:MF	ion channel activity	20166	1707	GO:0015075|GO:0015267|GO:0015318	9	2.47418	0.0183908
query_1	TRUE	0.00700981	345	48	7	0.145833	0.0202899	GO:0022836	GO:MF	gated channel activity	20166	4663	GO:0015267	9	2.15429	0.0202899
query_1	TRUE	0.00727132	484	48	8	0.166667	0.0165289	GO:0015267	GO:MF	channel activity	20166	3065	GO:0022803	9	2.13839	0.0165289
query_1	TRUE	0.00731089	135	48	5	0.104167	0.037037	GO:0015085	GO:MF	calcium ion transmembrane transporter activity	20166	2908	GO:0046873	9	2.13603	0.037037
query_1	TRUE	0.0073801	485	48	8	0.166667	0.0164948	GO:0022803	GO:MF	passive transmembrane transporter activity	20166	4647	GO:0022857	9	2.13194	0.0164948
query_1	TRUE	0.00871483	140	48	5	0.104167	0.0357143	GO:0099106	GO:MF	ion channel regulator activity	20166	10428	GO:0016247	9	2.05974	0.0357143
query_1	TRUE	0.0103203	145	48	5	0.104167	0.0344828	GO:0016247	GO:MF	channel regulator activity	20166	3459	GO:0098772	9	1.98631	0.0344828
query_1	TRUE	0.0117068	856	48	10	0.208333	0.0116822	GO:0015075	GO:MF	ion transmembrane transporter activity	20166	2901	GO:0022857	9	1.93156	0.0116822
query_1	TRUE	0.023804	5	48	2	0.0416667	0.4	GO:0005030	GO:MF	neurotrophin receptor activity	20166	1555	GO:0038023	9	1.62335	0.4
query_1	TRUE	0.00569825	146	28	5	0.178571	0.0342466	HPA:0090992	HPA	cerebellum; molecular layer - neuropil[â‰¥Medium]	10976	147	HPA:0090991	9	2.24426	0.0342466
query_1	TRUE	0.00807399	262	28	6	0.214286	0.0229008	HPA:0090991	HPA	cerebellum; molecular layer - neuropil[â‰¥Low]	10976	146	HPA:0090000	9	2.09291	0.0229008
query_1	TRUE	0.0144956	291	28	6	0.214286	0.0206186	HPA:0091061	HPA	cerebellum; synaptic glomeruli - core[â‰¥Low]	10976	173	HPA:0090000	9	1.83876	0.0206186
query_1	TRUE	0.0226148	195	28	5	0.178571	0.025641	HPA:0090921	HPA	cerebellum; GLUC cells - cytoplasm/membrane[â‰¥Low]	10976	110	HPA:0090000	9	1.64561	0.025641
query_1	TRUE	0.0290222	2610	28	16	0.571429	0.00613027	HPA:0100212	HPA	cerebral cortex; neuropil[â‰¥Medium]	10976	196	HPA:0100211	9	1.53727	0.00613027
query_1	TRUE	0.0469865	228	28	5	0.178571	0.0219298	HPA:0091062	HPA	cerebellum; synaptic glomeruli - core[â‰¥Medium]	10976	174	HPA:0091061	9	1.32803	0.0219298
query_1	TRUE	0.000904091	114	23	5	0.217391	0.0438596	KEGG:04724	KEGG	Glutamatergic synapse	8014	334	KEGG:00000	9	3.04379	0.0438596
query_1	TRUE	0.00375375	77	23	4	0.173913	0.0519481	KEGG:05412	KEGG	Arrhythmogenic right ventricular cardiomyopathy	8014	469	KEGG:00000	9	2.42553	0.0519481
query_1	TRUE	0.00579036	86	23	4	0.173913	0.0465116	KEGG:04911	KEGG	Insulin secretion	8014	347	KEGG:00000	9	2.23729	0.0465116
query_1	TRUE	0.0302932	239	23	5	0.217391	0.0209205	KEGG:04020	KEGG	Calcium signaling pathway	8014	231	KEGG:00000	9	1.51866	0.0209205
query_1	TRUE	0.0397902	142	23	4	0.173913	0.028169	KEGG:05017	KEGG	Spinocerebellar ataxia	8014	394	KEGG:00000	9	1.40022	0.028169
query_1	TRUE	0.044181	146	23	4	0.173913	0.0273973	KEGG:04514	KEGG	Cell adhesion molecules	8014	295	KEGG:00000	9	1.35476	0.0273973
query_1	TRUE	0.0489062	150	23	4	0.173913	0.0266667	KEGG:04261	KEGG	Adrenergic signaling in cardiomyocytes	8014	277	KEGG:00000	9	1.31064	0.0266667
query_1	TRUE	0.0122721	240	37	6	0.162162	0.025	MIRNA:hsa-miR-3924	MIRNA	hsa-miR-3924	14830	880	MIRNA:000000	9	1.91108	0.025
query_1	TRUE	2.21398e-05	400	30	10	0.333333	0.025	REAC:R-HSA-112316	REAC	Neuronal System	10760	1465	REAC:0000000	9	4.65483	0.025
query_1	TRUE	0.00758194	127	30	5	0.166667	0.0393701	REAC:R-HSA-5576891	REAC	Cardiac conduction	10760	289	REAC:R-HSA-397014	9	2.12022	0.0393701
query_1	TRUE	0.0283301	86	30	4	0.133333	0.0465116	REAC:R-HSA-6794362	REAC	Protein-protein interactions at synapses	10760	1682	REAC:R-HSA-112316	9	1.54775	0.0465116
query_1	TRUE	0.0498259	7	30	2	0.0666667	0.285714	REAC:R-HSA-5576894	REAC	Phase 1 - inactivation of fast Na+ channels	10760	1600	REAC:R-HSA-5576891	9	1.30255	0.285714
query_1	TRUE	0.0498259	7	30	2	0.0666667	0.285714	REAC:R-HSA-447043	REAC	Neurofascin interactions	10760	1464	REAC:R-HSA-373760	9	1.30255	0.285714
query_1	TRUE	0.0125991	5964	49	30	0.612245	0.00503018	TF:M10107	TF	Factor: DB1; motif: GGRRRRGRRGGAGGGGGNGRRR	19959	1194	TF:M00000	9	1.89966	0.00503018
query_1	TRUE	0.0168913	2914	49	20	0.408163	0.00686342	TF:M10108_1	TF	Factor: WT1; motif: RGGNGGGGGAGGRGGNGGRG; match class: 1	19959	8973	TF:M10108	9	1.77234	0.00686342
query_1	TRUE	0.0269758	2734	49	19	0.387755	0.00694952	TF:M10107_1	TF	Factor: DB1; motif: GGRRRRGRRGGAGGGGGNGRRR; match class: 1	19959	1195	TF:M10107	9	1.56903	0.00694952
query_1	TRUE	0.0365162	4242	49	24	0.489796	0.00565771	TF:M00649_1	TF	Factor: MAZ; motif: GGGGAGGG; match class: 1	19959	4995	TF:M00649	9	1.43751	0.00565771
query_1	TRUE	0.0452589	2833	49	19	0.387755	0.00670667	TF:M12535	TF	Factor: ZNF263; motif: NNGGGGAGGANN	19959	9778	TF:M00000	9	1.3443	0.00670667
query_1	TRUE	0.0102846	76	25	4	0.16	0.0526316	WP:WP2118	WP	Arrhythmogenic right ventricular cardiomyopathy	7806	627	WP:000000	9	1.98781	0.0526316
query_1	TRUE	0.0140686	31	25	3	0.12	0.0967742	WP:WP4561	WP	Cell migration and invasion through p75NTR	7806	697	WP:000000	9	1.85175	0.0967742
query_1	TRUE	0.0166696	2	19	2	0.105263	1	CORUM:6591	CORUM	Hsp90-p23 complex	3627	2241	CORUM:0000000	10	1.77807	1
query_1	TRUE	0.0498526	3	19	2	0.105263	0.666667	CORUM:999	CORUM	p23 protein complex	3627	537	CORUM:0000000	10	1.30231	0.666667
query_1	TRUE	2.82828e-27	214	38	20	0.526316	0.0934579	GO:0006457	GO:BP	protein folding	21029	2439	GO:0009987	10	26.5485	0.0934579
query_1	TRUE	5.75219e-21	65	38	13	0.342105	0.2	GO:0061077	GO:BP	chaperone-mediated protein folding	21029	17835	GO:0006457	10	20.2402	0.2
query_1	TRUE	1.76448e-19	159	38	15	0.394737	0.0943396	GO:0035966	GO:BP	response to topologically incorrect protein	21029	10795	GO:0006950|GO:0010033	10	18.7534	0.0943396
query_1	TRUE	2.03669e-18	138	38	14	0.368421	0.101449	GO:0006986	GO:BP	response to unfolded protein	21029	2915	GO:0035966	10	17.6911	0.101449
query_1	TRUE	1.43259e-16	40	38	10	0.263158	0.25	GO:0006458	GO:BP	'de novo' protein folding	21029	2440	GO:0006457	10	15.8439	0.25
query_1	TRUE	5.26242e-16	105	38	12	0.315789	0.114286	GO:0009408	GO:BP	response to heat	21029	3915	GO:0006950|GO:0009266	10	15.2788	0.114286
query_1	TRUE	2.49199e-15	31	38	9	0.236842	0.290323	GO:0051085	GO:BP	chaperone cofactor-dependent protein refolding	21029	15578	GO:0051084|GO:0061077	10	14.6035	0.290323
query_1	TRUE	5.70452e-15	178	38	13	0.342105	0.0730337	GO:0009266	GO:BP	response to temperature stimulus	21029	3865	GO:0009628	10	14.2438	0.0730337
query_1	TRUE	1.1565e-14	36	38	9	0.236842	0.25	GO:0051084	GO:BP	'de novo' posttranslational protein folding	21029	15577	GO:0006458	10	13.9369	0.25
query_1	TRUE	2.93502e-14	65	38	10	0.263158	0.153846	GO:0034605	GO:BP	cellular response to heat	21029	9985	GO:0009408|GO:0033554	10	13.5324	0.153846
query_1	TRUE	2.04384e-11	24	38	7	0.184211	0.291667	GO:0070841	GO:BP	inclusion body assembly	21029	19107	GO:0022607	10	10.6896	0.291667
query_1	TRUE	3.91537e-09	23	38	6	0.157895	0.26087	GO:0051131	GO:BP	chaperone-mediated protein complex assembly	21029	15616	GO:0065003	10	8.40723	0.26087
query_1	TRUE	1.07597e-08	3009	38	24	0.631579	0.00797607	GO:0010033	GO:BP	response to organic substance	21029	4309	GO:0042221	10	7.9682	0.00797607
query_1	TRUE	1.53904e-07	17	38	5	0.131579	0.294118	GO:0090083	GO:BP	regulation of inclusion body assembly	21029	21126	GO:0044087|GO:0051128|GO:0070841	10	6.81275	0.294118
query_1	TRUE	5.03464e-07	21	38	5	0.131579	0.238095	GO:0042026	GO:BP	protein refolding	21029	11505	GO:0006457	10	6.29803	0.238095
query_1	TRUE	6.09156e-07	1121	38	15	0.394737	0.0133809	GO:0009628	GO:BP	response to abiotic stimulus	21029	3998	GO:0050896	10	6.21527	0.0133809
query_1	TRUE	9.73896e-07	1852	38	18	0.473684	0.00971922	GO:0033554	GO:BP	cellular response to stress	21029	9528	GO:0006950|GO:0051716	10	6.01149	0.00971922
query_1	TRUE	2.56173e-06	190	38	8	0.210526	0.0421053	GO:0050821	GO:BP	protein stabilization	21029	15361	GO:0031647	10	5.59147	0.0421053
query_1	TRUE	3.31718e-06	4316	38	25	0.657895	0.0057924	GO:0042221	GO:BP	response to chemical	21029	11633	GO:0050896	10	5.47923	0.0057924
query_1	TRUE	5.10924e-06	11	38	4	0.105263	0.363636	GO:0090084	GO:BP	negative regulation of inclusion body assembly	21029	21127	GO:0051129|GO:0070841|GO:0090083	10	5.29164	0.363636
query_1	TRUE	1.09157e-05	3780	38	23	0.605263	0.00608466	GO:0006950	GO:BP	response to stress	21029	2886	GO:0050896	10	4.96195	0.00608466
query_1	TRUE	2.79964e-05	16	38	4	0.105263	0.25	GO:0061684	GO:BP	chaperone-mediated autophagy	21029	18333	GO:0006914|GO:0030163	10	4.5529	0.25
query_1	TRUE	3.11482e-05	850	38	12	0.315789	0.0141176	GO:0031329	GO:BP	regulation of cellular catabolic process	21029	8270	GO:0009894|GO:0031323|GO:0044248	10	4.50657	0.0141176
query_1	TRUE	5.93921e-05	19	38	4	0.105263	0.210526	GO:1900034	GO:BP	regulation of cellular response to heat	21029	23388	GO:0034605|GO:0080135	10	4.22627	0.210526
query_1	TRUE	8.85633e-05	299	38	8	0.210526	0.0267559	GO:0031647	GO:BP	regulation of protein stability	21029	8420	GO:0065008	10	4.05275	0.0267559
query_1	TRUE	0.000164511	989	38	12	0.315789	0.0121335	GO:0009894	GO:BP	regulation of catabolic process	21029	4216	GO:0009056|GO:0019222	10	3.7838	0.0121335
query_1	TRUE	0.000187012	6	38	3	0.0789474	0.5	GO:1905323	GO:BP	telomerase holoenzyme complex assembly	21029	28229	GO:0022618	10	3.72813	0.5
query_1	TRUE	0.000187012	6	38	3	0.0789474	0.5	GO:1902949	GO:BP	positive regulation of tau-protein kinase activity	21029	26068	GO:0045860|GO:1902947	10	3.72813	0.5
query_1	TRUE	0.000252195	1491	38	14	0.368421	0.00938967	GO:0044093	GO:BP	positive regulation of molecular function	21029	12646	GO:0065009	10	3.59826	0.00938967
query_1	TRUE	0.000269182	648	38	10	0.263158	0.0154321	GO:0080135	GO:BP	regulation of cellular response to stress	21029	20895	GO:0033554|GO:0050794|GO:0080134	10	3.56995	0.0154321
query_1	TRUE	0.000414873	868	38	11	0.289474	0.0126728	GO:0051338	GO:BP	regulation of transferase activity	21029	15793	GO:0050790	10	3.38208	0.0126728
query_1	TRUE	0.000522326	8	38	3	0.0789474	0.375	GO:1903748	GO:BP	negative regulation of establishment of protein localization to mitochondrion	21029	26790	GO:0048523|GO:0072655|GO:1903747|GO:1904950	10	3.28206	0.375
query_1	TRUE	0.00065333	5529	38	25	0.657895	0.00452161	GO:0051171	GO:BP	regulation of nitrogen compound metabolic process	21029	15655	GO:0006807|GO:0019222	10	3.18487	0.00452161
query_1	TRUE	0.000703353	84	38	5	0.131579	0.0595238	GO:0010833	GO:BP	telomere maintenance via telomere lengthening	21029	4969	GO:0000723	10	3.15283	0.0595238
query_1	TRUE	0.000917714	940	38	11	0.289474	0.0117021	GO:0044087	GO:BP	regulation of cellular component biogenesis	21029	12640	GO:0044085|GO:0050794	10	3.03729	0.0117021
query_1	TRUE	0.00119758	5694	38	25	0.657895	0.00439059	GO:0080090	GO:BP	regulation of primary metabolic process	21029	20875	GO:0019222|GO:0044238	10	2.9217	0.00439059
query_1	TRUE	0.00153324	11	38	3	0.0789474	0.272727	GO:1902947	GO:BP	regulation of tau-protein kinase activity	21029	26066	GO:0045859	10	2.81439	0.272727
query_1	TRUE	0.00159781	99	38	5	0.131579	0.0505051	GO:0034620	GO:BP	cellular response to unfolded protein	21029	9994	GO:0006986|GO:0035967	10	2.79647	0.0505051
query_1	TRUE	0.00171971	2330	38	16	0.421053	0.00686695	GO:0051172	GO:BP	negative regulation of nitrogen compound metabolic process	21029	15656	GO:0006807|GO:0009892|GO:0051171	10	2.76454	0.00686695
query_1	TRUE	0.00194797	3008	38	18	0.473684	0.00598404	GO:0070887	GO:BP	cellular response to chemical stimulus	21029	19132	GO:0042221|GO:0051716	10	2.71042	0.00598404
query_1	TRUE	0.00203691	3017	38	18	0.473684	0.00596619	GO:0065009	GO:BP	regulation of molecular function	21029	18630	GO:0065007	10	2.69103	0.00596619
query_1	TRUE	0.00204177	12	38	3	0.0789474	0.25	GO:0097201	GO:BP	negative regulation of transcription from RNA polymerase II promoter in response to stress	21029	21721	GO:0000122|GO:0043618	10	2.68999	0.25
query_1	TRUE	0.00205274	2057	38	15	0.394737	0.00729217	GO:0008219	GO:BP	cell death	21029	3562	GO:0009987	10	2.68767	0.00729217
query_1	TRUE	0.00235542	2385	38	16	0.421053	0.0067086	GO:0071310	GO:BP	cellular response to organic substance	21029	19359	GO:0010033|GO:0070887	10	2.62793	0.0067086
query_1	TRUE	0.0024625	1273	38	12	0.315789	0.00942655	GO:0080134	GO:BP	regulation of response to stress	21029	20894	GO:0006950|GO:0048583	10	2.60862	0.00942655
query_1	TRUE	0.00265827	5921	38	25	0.657895	0.00422226	GO:0031323	GO:BP	regulation of cellular metabolic process	21029	8264	GO:0019222|GO:0044237|GO:0050794	10	2.5754	0.00422226
query_1	TRUE	0.00307877	113	38	5	0.131579	0.0442478	GO:2000278	GO:BP	regulation of DNA biosynthetic process	21029	29506	GO:0051052|GO:0071897|GO:2000112	10	2.51162	0.0442478
query_1	TRUE	0.00339014	50	38	4	0.105263	0.08	GO:0051972	GO:BP	regulation of telomerase activity	21029	16248	GO:0051338|GO:2000278	10	2.46978	0.08
query_1	TRUE	0.00363443	1857	38	14	0.368421	0.00753904	GO:0006915	GO:BP	apoptotic process	21029	2857	GO:0012501	10	2.43956	0.00753904
query_1	TRUE	0.00380633	2472	38	16	0.421053	0.00647249	GO:0051246	GO:BP	regulation of protein metabolic process	21029	15716	GO:0019538|GO:0051171|GO:0060255|GO:0080090	10	2.41949	0.00647249
query_1	TRUE	0.00381262	118	38	5	0.131579	0.0423729	GO:0035967	GO:BP	cellular response to topologically incorrect protein	21029	10796	GO:0033554|GO:0035966|GO:0071310	10	2.41878	0.0423729
query_1	TRUE	0.00424937	1341	38	12	0.315789	0.00894855	GO:0009057	GO:BP	macromolecule catabolic process	21029	3662	GO:0043170|GO:1901575	10	2.37168	0.00894855
query_1	TRUE	0.00426063	2493	38	16	0.421053	0.00641797	GO:0031324	GO:BP	negative regulation of cellular metabolic process	21029	8265	GO:0009892|GO:0031323|GO:0044237|GO:0048523	10	2.37053	0.00641797
query_1	TRUE	0.00444429	1104	38	11	0.289474	0.00996377	GO:0043085	GO:BP	positive regulation of catalytic activity	21029	12141	GO:0044093|GO:0050790	10	2.3522	0.00996377
query_1	TRUE	0.00486784	124	38	5	0.131579	0.0403226	GO:0072655	GO:BP	establishment of protein localization to mitochondrion	21029	20387	GO:0070585|GO:0072594	10	2.31266	0.0403226
query_1	TRUE	0.00501501	1908	38	14	0.368421	0.00733753	GO:0012501	GO:BP	programmed cell death	21029	5118	GO:0008219	10	2.29973	0.00733753
query_1	TRUE	0.00591186	129	38	5	0.131579	0.0387597	GO:0070585	GO:BP	protein localization to mitochondrion	21029	18957	GO:0033365	10	2.22828	0.0387597
query_1	TRUE	0.0061446	8815	38	30	0.789474	0.00340329	GO:0050896	GO:BP	response to stimulus	21029	15425	GO:0008150	10	2.21151	0.00340329
query_1	TRUE	0.00719649	6710	38	26	0.684211	0.00387481	GO:0060255	GO:BP	regulation of macromolecule metabolic process	21029	17047	GO:0019222|GO:0043170	10	2.14288	0.00387481
query_1	TRUE	0.00775552	728	38	9	0.236842	0.0123626	GO:0030162	GO:BP	regulation of proteolysis	21029	7725	GO:0006508|GO:0051246	10	2.11039	0.0123626
query_1	TRUE	0.00794038	137	38	5	0.131579	0.0364964	GO:0000723	GO:BP	telomere maintenance	21029	257	GO:0006259|GO:0032200	10	2.10016	0.0364964
query_1	TRUE	0.00822811	138	38	5	0.131579	0.0362319	GO:0032434	GO:BP	regulation of proteasomal ubiquitin-dependent protein catabolic process	21029	8764	GO:0043161|GO:0061136|GO:2000058	10	2.0847	0.0362319
query_1	TRUE	0.00880343	2309	38	15	0.394737	0.00649632	GO:0032268	GO:BP	regulation of cellular protein metabolic process	21029	8649	GO:0031323|GO:0044267|GO:0051246	10	2.05535	0.00649632
query_1	TRUE	0.00891481	19	38	3	0.0789474	0.157895	GO:1901673	GO:BP	regulation of mitotic spindle assembly	21029	24951	GO:0060236|GO:0090169|GO:0090307	10	2.04989	0.157895
query_1	TRUE	0.00904343	2314	38	15	0.394737	0.00648228	GO:0050790	GO:BP	regulation of catalytic activity	21029	15337	GO:0065009	10	2.04367	0.00648228
query_1	TRUE	0.00914068	141	38	5	0.131579	0.035461	GO:0050684	GO:BP	regulation of mRNA processing	21029	15281	GO:0006397|GO:1903311	10	2.03902	0.035461
query_1	TRUE	0.0100764	254	38	6	0.157895	0.023622	GO:0032886	GO:BP	regulation of microtubule-based process	21029	9098	GO:0007017|GO:0050794	10	1.9967	0.023622
query_1	TRUE	0.0100889	752	38	9	0.236842	0.0119681	GO:0043549	GO:BP	regulation of kinase activity	21029	12408	GO:0042325|GO:0051338	10	1.99615	0.0119681
query_1	TRUE	0.0113669	401	38	7	0.184211	0.0174564	GO:0042176	GO:BP	regulation of protein catabolic process	21029	11588	GO:0009894|GO:0030163|GO:0051246	10	1.94436	0.0174564
query_1	TRUE	0.0115167	260	38	6	0.157895	0.0230769	GO:1903362	GO:BP	regulation of cellular protein catabolic process	21029	26432	GO:0031329|GO:0032268|GO:0042176|GO:0044257	10	1.93867	0.0230769
query_1	TRUE	0.0118999	1223	38	11	0.289474	0.00899428	GO:0042325	GO:BP	regulation of phosphorylation	21029	11680	GO:0016310|GO:0019220	10	1.92446	0.00899428
query_1	TRUE	0.0127692	151	38	5	0.131579	0.0331126	GO:0043484	GO:BP	regulation of RNA splicing	21029	12371	GO:0008380|GO:0010468|GO:0051252	10	1.89384	0.0331126
query_1	TRUE	0.0139197	71	38	4	0.105263	0.056338	GO:0007004	GO:BP	telomere maintenance via telomerase	21029	2929	GO:0006278|GO:0010833	10	1.85637	0.056338
query_1	TRUE	0.0147195	72	38	4	0.105263	0.0555556	GO:0006278	GO:BP	RNA-dependent DNA biosynthetic process	21029	2294	GO:0071897	10	1.83211	0.0555556
query_1	TRUE	0.0164273	3	38	2	0.0526316	0.666667	GO:1902988	GO:BP	neurofibrillary tangle assembly	21029	26106	GO:0070841	10	1.78443	0.666667
query_1	TRUE	0.0165088	1022	38	10	0.263158	0.00978474	GO:0051248	GO:BP	negative regulation of protein metabolic process	21029	15718	GO:0010605|GO:0019538|GO:0051172|GO:0051246	10	1.78228	0.00978474
query_1	TRUE	0.0179677	1826	38	13	0.342105	0.00711939	GO:0046907	GO:BP	intracellular transport	21029	14456	GO:0006810|GO:0051641|GO:0051649	10	1.74551	0.00711939
query_1	TRUE	0.0190735	164	38	5	0.131579	0.0304878	GO:0032200	GO:BP	telomere organization	21029	8586	GO:0051276	10	1.71957	0.0304878
query_1	TRUE	0.0214351	168	38	5	0.131579	0.0297619	GO:2000058	GO:BP	regulation of ubiquitin-dependent protein catabolic process	21029	29289	GO:0006511|GO:1903050	10	1.66887	0.0297619
query_1	TRUE	0.0222448	1575	38	12	0.315789	0.00761905	GO:0010941	GO:BP	regulation of cell death	21029	5064	GO:0008219|GO:0050794	10	1.65277	0.00761905
query_1	TRUE	0.0237119	26	38	3	0.0789474	0.115385	GO:0090169	GO:BP	regulation of spindle assembly	21029	21206	GO:0051225|GO:0090224|GO:1902115	10	1.62503	0.115385
query_1	TRUE	0.0248164	2188	38	14	0.368421	0.00639854	GO:0044248	GO:BP	cellular catabolic process	21029	12703	GO:0009056|GO:0044237	10	1.60526	0.00639854
query_1	TRUE	0.0293933	2547	38	15	0.394737	0.00588928	GO:0009056	GO:BP	catabolic process	21029	3661	GO:0008152	10	1.53175	0.00588928
query_1	TRUE	0.0297007	465	38	7	0.184211	0.0150538	GO:0001819	GO:BP	positive regulation of cytokine production	21029	588	GO:0001816|GO:0001817|GO:0010628|GO:0051240	10	1.52723	0.0150538
query_1	TRUE	0.0312838	866	38	9	0.236842	0.0103926	GO:0043066	GO:BP	negative regulation of apoptotic process	21029	12135	GO:0006915|GO:0042981|GO:0043069	10	1.50468	0.0103926
query_1	TRUE	0.0322063	7219	38	26	0.684211	0.00360161	GO:0019222	GO:BP	regulation of metabolic process	21029	6480	GO:0008152|GO:0050789	10	1.49206	0.00360161
query_1	TRUE	0.0325891	1105	38	10	0.263158	0.00904977	GO:0033365	GO:BP	protein localization to organelle	21029	9410	GO:0034613	10	1.48693	0.00904977
query_1	TRUE	0.0334907	2246	38	14	0.368421	0.0062333	GO:0051128	GO:BP	regulation of cellular component organization	21029	15613	GO:0016043|GO:0050794	10	1.47508	0.0062333
query_1	TRUE	0.0340645	1367	38	11	0.289474	0.00804682	GO:0019220	GO:BP	regulation of phosphate metabolic process	21029	6478	GO:0006796|GO:0051174	10	1.4677	0.00804682
query_1	TRUE	0.034134	185	38	5	0.131579	0.027027	GO:0071897	GO:BP	DNA biosynthetic process	21029	19815	GO:0006259|GO:0034645|GO:0034654	10	1.46681	0.027027
query_1	TRUE	0.0345334	1369	38	11	0.289474	0.00803506	GO:0051174	GO:BP	regulation of phosphorus metabolic process	21029	15658	GO:0006793|GO:0031323	10	1.46176	0.00803506
query_1	TRUE	0.035779	1117	38	10	0.263158	0.00895255	GO:0010628	GO:BP	positive regulation of gene expression	21029	4775	GO:0010467|GO:0010468|GO:0010604	10	1.44637	0.00895255
query_1	TRUE	0.036496	883	38	9	0.236842	0.0101925	GO:0043069	GO:BP	negative regulation of programmed cell death	21029	12138	GO:0012501|GO:0043067|GO:0060548	10	1.43775	0.0101925
query_1	TRUE	0.040806	192	38	5	0.131579	0.0260417	GO:0061136	GO:BP	regulation of proteasomal protein catabolic process	21029	17891	GO:0010498|GO:1903050	10	1.38928	0.0260417
query_1	TRUE	0.0409593	680	38	8	0.210526	0.0117647	GO:0051129	GO:BP	negative regulation of cellular component organization	21029	15614	GO:0016043|GO:0048523|GO:0051128	10	1.38765	0.0117647
query_1	TRUE	0.0439581	195	38	5	0.131579	0.025641	GO:0031334	GO:BP	positive regulation of protein-containing complex assembly	21029	8274	GO:0043254|GO:0044089|GO:0051130|GO:0065003	10	1.35696	0.025641
query_1	TRUE	0.0442142	95	38	4	0.105263	0.0421053	GO:0032273	GO:BP	positive regulation of protein polymerization	21029	8654	GO:0031334|GO:0032271|GO:0051258	10	1.35444	0.0421053
query_1	TRUE	0.0457686	1411	38	11	0.289474	0.00779589	GO:0042981	GO:BP	regulation of apoptotic process	21029	12076	GO:0006915|GO:0043067	10	1.33943	0.00779589
query_1	TRUE	1.3373e-09	2110	39	21	0.538462	0.00995261	GO:0070062	GO:CC	extracellular exosome	21672	2739	GO:0005615|GO:1903561	10	8.87377	0.00995261
query_1	TRUE	1.63287e-09	2132	39	21	0.538462	0.00984991	GO:1903561	GO:CC	extracellular vesicle	21672	4067	GO:0031982|GO:0065010	10	8.78705	0.00984991
query_1	TRUE	1.64767e-09	2133	39	21	0.538462	0.00984529	GO:0043230	GO:CC	extracellular organelle	21672	2127	GO:0005576|GO:0043226	10	8.78313	0.00984529
query_1	TRUE	1.64767e-09	2133	39	21	0.538462	0.00984529	GO:0065010	GO:CC	extracellular membrane-bounded organelle	21672	2715	GO:0043227|GO:0043230	10	8.78313	0.00984529
query_1	TRUE	9.75371e-07	75	39	6	0.153846	0.08	GO:0016234	GO:CC	inclusion body	21672	856	GO:0005622	10	6.01083	0.08
query_1	TRUE	7.63007e-06	3353	39	21	0.538462	0.00626305	GO:0005615	GO:CC	extracellular space	21672	277	GO:0005576|GO:0110165	10	5.11747	0.00626305
query_1	TRUE	9.58326e-06	5373	39	26	0.666667	0.00483901	GO:0005829	GO:CC	cytosol	21672	469	GO:0005737|GO:0110165	10	5.01849	0.00483901
query_1	TRUE	2.61091e-05	6569	39	28	0.717949	0.00426244	GO:0070013	GO:CC	intracellular organelle lumen	21672	2716	GO:0043229|GO:0043233	10	4.58321	0.00426244
query_1	TRUE	2.62028e-05	6570	39	28	0.717949	0.0042618	GO:0043233	GO:CC	organelle lumen	21672	2130	GO:0031974|GO:0043226	10	4.58165	0.0042618
query_1	TRUE	2.62028e-05	6570	39	28	0.717949	0.0042618	GO:0031974	GO:CC	membrane-enclosed lumen	21672	1444	GO:0110165	10	4.58165	0.0042618
query_1	TRUE	4.15128e-05	28	39	4	0.102564	0.142857	GO:0101031	GO:CC	chaperone complex	21672	3800	GO:0032991	10	4.38182	0.142857
query_1	TRUE	9.43007e-05	719	39	10	0.25641	0.0139082	GO:0048471	GO:CC	perinuclear region of cytoplasm	21672	2538	GO:0005737|GO:0110165	10	4.02548	0.0139082
query_1	TRUE	0.000117201	4303	39	22	0.564103	0.00511271	GO:0005576	GO:CC	extracellular region	21672	240	GO:0110165	10	3.93107	0.00511271
query_1	TRUE	0.000132735	3942	39	21	0.538462	0.00532725	GO:0031982	GO:CC	vesicle	21672	1451	GO:0043227	10	3.87702	0.00532725
query_1	TRUE	0.000650911	124	39	5	0.128205	0.0403226	GO:1904813	GO:CC	ficolin-1-rich granule lumen	21672	4086	GO:0070013|GO:0101002	10	3.18648	0.0403226
query_1	TRUE	0.00145142	12193	39	35	0.897436	0.0028705	GO:0005737	GO:CC	cytoplasm	21672	384	GO:0005622|GO:0110165	10	2.83821	0.0028705
query_1	TRUE	0.00160806	4161	39	20	0.512821	0.00480654	GO:0005654	GO:CC	nucleoplasm	21672	311	GO:0031981|GO:0110165	10	2.7937	0.00480654
query_1	TRUE	0.00396307	860	39	9	0.230769	0.0104651	GO:0030141	GO:CC	secretory granule	21672	1079	GO:0012505|GO:0099503	10	2.40197	0.0104651
query_1	TRUE	0.0044469	184	39	5	0.128205	0.0271739	GO:0101002	GO:CC	ficolin-1-rich granule	21672	3796	GO:0030141	10	2.35194	0.0271739
query_1	TRUE	0.00724748	34	39	3	0.0769231	0.0882353	GO:0008180	GO:CC	COP9 signalosome	21672	605	GO:0140513	10	2.13981	0.0882353
query_1	TRUE	0.00734755	5	39	2	0.0512821	0.4	GO:0097418	GO:CC	neurofibrillary tangle	21672	3336	GO:0016234	10	2.13386	0.4
query_1	TRUE	0.00791707	35	39	3	0.0769231	0.0857143	GO:0016235	GO:CC	aggresome	21672	857	GO:0016234	10	2.10144	0.0857143
query_1	TRUE	0.00915663	15557	39	38	0.974359	0.00244263	GO:0043227	GO:CC	membrane-bounded organelle	21672	2124	GO:0043226	10	2.03826	0.00244263
query_1	TRUE	0.0156775	1025	39	9	0.230769	0.00878049	GO:0099503	GO:CC	secretory vesicle	21672	3776	GO:0031410	10	1.80472	0.00878049
query_1	TRUE	0.020503	8	39	2	0.0512821	0.25	GO:0044294	GO:CC	dendritic growth cone	21672	2299	GO:0030426|GO:0044292	10	1.68818	0.25
query_1	TRUE	0.0209501	414	39	6	0.153846	0.0144928	GO:0016607	GO:CC	nuclear speck	21672	901	GO:0016604	10	1.67881	0.0144928
query_1	TRUE	0.0226569	612	39	7	0.179487	0.0114379	GO:0030425	GO:CC	dendrite	21672	1099	GO:0043005|GO:0097447	10	1.6448	0.0114379
query_1	TRUE	0.0231223	614	39	7	0.179487	0.0114007	GO:0097447	GO:CC	dendritic tree	21672	3353	GO:0036477|GO:0043005	10	1.63597	0.0114007
query_1	TRUE	0.0231262	10053	39	30	0.769231	0.00298418	GO:0005634	GO:CC	nucleus	21672	294	GO:0043231	10	1.6359	0.00298418
query_1	TRUE	0.024735	137	39	4	0.102564	0.0291971	GO:0072562	GO:CC	blood microparticle	21672	3149	GO:0005615|GO:0110165	10	1.60669	0.0291971
query_1	TRUE	0.0267635	5442	39	21	0.538462	0.00385888	GO:0031981	GO:CC	nuclear lumen	21672	1450	GO:0005634|GO:0070013	10	1.57246	0.00385888
query_1	TRUE	0.030772	869	39	8	0.205128	0.00920598	GO:0016604	GO:CC	nuclear body	21672	898	GO:0005654|GO:0110165	10	1.51184	0.00920598
query_1	TRUE	0.0328763	10	39	2	0.0512821	0.2	GO:0005641	GO:CC	nuclear envelope lumen	21672	300	GO:0005635|GO:0031970	10	1.48312	0.2
query_1	TRUE	0.0482723	163	39	4	0.102564	0.0245399	GO:0030426	GO:CC	growth cone	21672	1100	GO:0030427|GO:0150034	10	1.3163	0.0245399
query_1	TRUE	0.0486054	14514	39	36	0.923077	0.00248036	GO:0043231	GO:CC	intracellular membrane-bounded organelle	21672	2128	GO:0043227|GO:0043229	10	1.31332	0.00248036
query_1	TRUE	4.17579e-19	128	39	14	0.358974	0.109375	GO:0031072	GO:MF	heat shock protein binding	20166	5028	GO:0005515	10	18.3793	0.109375
query_1	TRUE	6.40948e-18	112	39	13	0.333333	0.116071	GO:0051082	GO:MF	unfolded protein binding	20166	9099	GO:0005515	10	17.1932	0.116071
query_1	TRUE	2.81113e-14	106	39	11	0.282051	0.103774	GO:0051087	GO:MF	chaperone binding	20166	9100	GO:0005515	10	13.5511	0.103774
query_1	TRUE	3.16604e-12	41	39	8	0.205128	0.195122	GO:0044183	GO:MF	protein folding chaperone	20166	7049	GO:0003674	10	11.4995	0.195122
query_1	TRUE	5.09019e-09	316	39	11	0.282051	0.0348101	GO:0016887	GO:MF	ATP hydrolysis activity	20166	3845	GO:0017111|GO:0140657	10	8.29327	0.0348101
query_1	TRUE	4.08658e-07	25	39	5	0.128205	0.2	GO:0001671	GO:MF	ATPase activator activity	20166	306	GO:0140677	10	6.38864	0.2
query_1	TRUE	5.14438e-07	1576	39	17	0.435897	0.0107868	GO:0030554	GO:MF	adenyl nucleotide binding	20166	4874	GO:0017076	10	6.28867	0.0107868
query_1	TRUE	1.54004e-06	296	39	9	0.230769	0.0304054	GO:0031625	GO:MF	ubiquitin protein ligase binding	20166	5088	GO:0044389	10	5.81247	0.0304054
query_1	TRUE	1.80045e-06	550	39	11	0.282051	0.02	GO:0140657	GO:MF	ATP-dependent activity	20166	11910	GO:0003674	10	5.74462	0.02
query_1	TRUE	1.80508e-06	33	39	5	0.128205	0.151515	GO:0140677	GO:MF	molecular function activator activity	20166	11923	GO:0098772	10	5.7435	0.151515
query_1	TRUE	2.30173e-06	1502	39	16	0.410256	0.0106525	GO:0005524	GO:MF	ATP binding	20166	1884	GO:0032559|GO:0035639	10	5.63795	0.0106525
query_1	TRUE	2.57505e-06	314	39	9	0.230769	0.0286624	GO:0044389	GO:MF	ubiquitin-like protein ligase binding	20166	7060	GO:0019899	10	5.58922	0.0286624
query_1	TRUE	4.14508e-06	1565	39	16	0.410256	0.0102236	GO:0032559	GO:MF	adenyl ribonucleotide binding	20166	5402	GO:0030554|GO:0032555	10	5.38247	0.0102236
query_1	TRUE	7.21889e-06	43	39	5	0.128205	0.116279	GO:0051879	GO:MF	Hsp90 protein binding	20166	9227	GO:0031072	10	5.14153	0.116279
query_1	TRUE	1.1035e-05	1930	39	17	0.435897	0.00880829	GO:0017076	GO:MF	purine nucleotide binding	20166	3952	GO:0000166	10	4.95723	0.00880829
query_1	TRUE	1.10787e-05	656	39	11	0.282051	0.0167683	GO:0017111	GO:MF	nucleoside-triphosphatase activity	20166	3975	GO:0016462	10	4.95551	0.0167683
query_1	TRUE	2.33504e-05	2030	39	17	0.435897	0.00837438	GO:0019899	GO:MF	enzyme binding	20166	4609	GO:0005515	10	4.63171	0.00837438
query_1	TRUE	2.55247e-05	712	39	11	0.282051	0.0154494	GO:0016462	GO:MF	pyrophosphatase activity	20166	3540	GO:0016818	10	4.59304	0.0154494
query_1	TRUE	2.6637e-05	715	39	11	0.282051	0.0153846	GO:0016817	GO:MF	hydrolase activity, acting on acid anhydrides	20166	3777	GO:0016787	10	4.57451	0.0153846
query_1	TRUE	2.6637e-05	715	39	11	0.282051	0.0153846	GO:0016818	GO:MF	hydrolase activity, acting on acid anhydrides, in phosphorus-containing anhydrides	20166	3778	GO:0016817	10	4.57451	0.0153846
query_1	TRUE	4.31864e-05	1848	39	16	0.410256	0.00865801	GO:0035639	GO:MF	purine ribonucleoside triphosphate binding	20166	6332	GO:0043168|GO:1901265	10	4.36465	0.00865801
query_1	TRUE	5.08438e-05	6	39	3	0.0769231	0.5	GO:0055131	GO:MF	C3HC4-type RING finger domain binding	20166	9565	GO:0019904	10	4.29376	0.5
query_1	TRUE	6.3873e-05	2174	39	17	0.435897	0.00781969	GO:0000166	GO:MF	nucleotide binding	20166	35	GO:0036094|GO:1901265	10	4.19468	0.00781969
query_1	TRUE	6.43029e-05	2175	39	17	0.435897	0.00781609	GO:1901265	GO:MF	nucleoside phosphate binding	20166	11971	GO:0097159|GO:1901363	10	4.19177	0.00781609
query_1	TRUE	7.17985e-05	1917	39	16	0.410256	0.00834637	GO:0032555	GO:MF	purine ribonucleotide binding	20166	5398	GO:0017076|GO:0032553	10	4.14388	0.00834637
query_1	TRUE	8.11095e-05	1934	39	16	0.410256	0.00827301	GO:0032553	GO:MF	ribonucleotide binding	20166	5396	GO:0000166|GO:0097367	10	4.09093	0.00827301
query_1	TRUE	8.86749e-05	2516	39	18	0.461538	0.00715421	GO:0036094	GO:MF	small molecule binding	20166	6379	GO:0005488	10	4.0522	0.00715421
query_1	TRUE	9.02491e-05	28	39	4	0.102564	0.142857	GO:0051787	GO:MF	misfolded protein binding	20166	9221	GO:0005515	10	4.04456	0.142857
query_1	TRUE	0.000134139	2288	39	17	0.435897	0.00743007	GO:0097367	GO:MF	carbohydrate derivative binding	20166	10312	GO:0005488	10	3.87244	0.00743007
query_1	TRUE	0.000282911	2410	39	17	0.435897	0.00705394	GO:0043168	GO:MF	anion binding	20166	6762	GO:0043167	10	3.54835	0.00705394
query_1	TRUE	0.00331387	21	39	3	0.0769231	0.142857	GO:0070182	GO:MF	DNA polymerase binding	20166	9822	GO:0019899	10	2.47967	0.142857
query_1	TRUE	0.00762693	1275	39	11	0.282051	0.00862745	GO:0044877	GO:MF	protein-containing complex binding	20166	7116	GO:0005488	10	2.11765	0.00862745
query_1	TRUE	0.0133777	33	39	3	0.0769231	0.0909091	GO:0097718	GO:MF	disordered domain specific binding	20166	10350	GO:0019904	10	1.87362	0.0909091
query_1	TRUE	0.0138591	5	39	2	0.0512821	0.4	GO:0140545	GO:MF	protein disaggregase activity	20166	11871	GO:0140657	10	1.85827	0.4
query_1	TRUE	0.0138771	97	39	4	0.102564	0.0412371	GO:0003730	GO:MF	mRNA 3'-UTR binding	20166	441	GO:0003729	10	1.8577	0.0412371
query_1	TRUE	0.0165451	690	39	8	0.205128	0.0115942	GO:0019904	GO:MF	protein domain specific binding	20166	4614	GO:0005515	10	1.78133	0.0115942
query_1	TRUE	0.0207632	6	39	2	0.0512821	0.333333	GO:0030911	GO:MF	TPR domain binding	20166	5005	GO:0019904	10	1.68271	0.333333
query_1	TRUE	0.0290329	7	39	2	0.0512821	0.285714	GO:0030235	GO:MF	nitric-oxide synthase regulator activity	20166	4765	GO:0030234	10	1.53711	0.285714
query_1	TRUE	0.0298572	43	39	3	0.0769231	0.0697674	GO:0048156	GO:MF	tau protein binding	20166	8372	GO:0008092	10	1.52495	0.0697674
query_1	TRUE	0.0350731	123	39	4	0.102564	0.0325203	GO:0003697	GO:MF	single-stranded DNA binding	20166	416	GO:0003677	10	1.45503	0.0325203
query_1	TRUE	0.0350731	123	39	4	0.102564	0.0325203	GO:0042826	GO:MF	histone deacetylase binding	20166	6684	GO:0019899	10	1.45503	0.0325203
query_1	TRUE	0.0457806	3142	39	16	0.410256	0.0050923	GO:0003723	GO:MF	RNA binding	20166	435	GO:0003676	10	1.33932	0.0050923
query_1	TRUE	0.018549	19	13	3	0.230769	0.157895	HP:0012548	HP	Fatty replacement of skeletal muscle	4667	8969	HP:0011805	10	1.73168	0.157895
query_1	TRUE	1.93133e-07	725	34	15	0.441176	0.0206897	HPA:0470671	HPA	skin 2; melanocytes[â‰¥Low]	10976	691	HPA:0470000	10	6.71414	0.0206897
query_1	TRUE	6.33396e-07	790	34	15	0.441176	0.0189873	HPA:0471461	HPA	skin 2; langerhans cells[â‰¥Low]	10976	685	HPA:0470000	10	6.19832	0.0189873
query_1	TRUE	1.05553e-06	964	34	16	0.470588	0.0165975	HPA:0471391	HPA	skin 2; cells in basal layer[â‰¥Low]	10976	655	HPA:0470000	10	5.97653	0.0165975
query_1	TRUE	2.44693e-06	872	34	15	0.441176	0.0172018	HPA:0471411	HPA	skin 2; cells in spinous layer[â‰¥Low]	10976	664	HPA:0470000	10	5.61138	0.0172018
query_1	TRUE	2.81343e-06	881	34	15	0.441176	0.0170261	HPA:0461391	HPA	skin 1; cells in basal layer[â‰¥Low]	10976	603	HPA:0460000	10	5.55076	0.0170261
query_1	TRUE	3.60008e-06	756	34	14	0.411765	0.0185185	HPA:0471392	HPA	skin 2; cells in basal layer[â‰¥Medium]	10976	656	HPA:0471391	10	5.44369	0.0185185
query_1	TRUE	7.74747e-06	803	34	14	0.411765	0.0174346	HPA:0471471	HPA	skin 2; lymphocytes[â‰¥Low]	10976	688	HPA:0470000	10	5.11084	0.0174346
query_1	TRUE	1.02933e-05	684	34	13	0.382353	0.0190058	HPA:0471412	HPA	skin 2; cells in spinous layer[â‰¥Medium]	10976	665	HPA:0471411	10	4.98744	0.0190058
query_1	TRUE	1.12861e-05	563	34	12	0.352941	0.0213144	HPA:0470182	HPA	skin 2; cells in granular layer[â‰¥Medium]	10976	662	HPA:0470181	10	4.94746	0.0213144
query_1	TRUE	1.76545e-05	716	34	13	0.382353	0.0181564	HPA:0461461	HPA	skin 1; langerhans cells[â‰¥Low]	10976	636	HPA:0460000	10	4.75314	0.0181564
query_1	TRUE	1.885e-05	720	34	13	0.382353	0.0180556	HPA:0470181	HPA	skin 2; cells in granular layer[â‰¥Low]	10976	661	HPA:0470000	10	4.72469	0.0180556
query_1	TRUE	1.96104e-05	592	34	12	0.352941	0.0202703	HPA:0461412	HPA	skin 1; cells in spinous layer[â‰¥Medium]	10976	613	HPA:0461411	10	4.70751	0.0202703
query_1	TRUE	2.78347e-05	889	34	14	0.411765	0.015748	HPA:0470201	HPA	skin 2; endothelial cells[â‰¥Low]	10976	670	HPA:0470000	10	4.55541	0.015748
query_1	TRUE	3.55114e-05	760	34	13	0.382353	0.0171053	HPA:0461411	HPA	skin 1; cells in spinous layer[â‰¥Low]	10976	612	HPA:0460000	10	4.44963	0.0171053
query_1	TRUE	4.36398e-05	637	34	12	0.352941	0.0188383	HPA:0461392	HPA	skin 1; cells in basal layer[â‰¥Medium]	10976	604	HPA:0461391	10	4.36012	0.0188383
query_1	TRUE	4.67107e-05	641	34	12	0.352941	0.0187207	HPA:0470672	HPA	skin 2; melanocytes[â‰¥Medium]	10976	692	HPA:0470671	10	4.33058	0.0187207
query_1	TRUE	6.73307e-05	663	34	12	0.352941	0.0180995	HPA:0471462	HPA	skin 2; langerhans cells[â‰¥Medium]	10976	686	HPA:0471461	10	4.17179	0.0180995
query_1	TRUE	0.000102731	558	34	11	0.323529	0.0197133	HPA:0460182	HPA	skin 1; cells in granular layer[â‰¥Medium]	10976	610	HPA:0460181	10	3.9883	0.0197133
query_1	TRUE	0.000113241	840	34	13	0.382353	0.0154762	HPA:0460201	HPA	skin 1; endothelial cells[â‰¥Low]	10976	618	HPA:0460000	10	3.946	0.0154762
query_1	TRUE	0.000145896	578	34	11	0.323529	0.0190311	HPA:0461462	HPA	skin 1; langerhans cells[â‰¥Medium]	10976	637	HPA:0461461	10	3.83596	0.0190311
query_1	TRUE	0.00020322	884	34	13	0.382353	0.0147059	HPA:0461441	HPA	skin 1; fibrohistiocytic cells[â‰¥Low]	10976	627	HPA:0460000	10	3.69203	0.0147059
query_1	TRUE	0.000282607	2056	34	19	0.558824	0.00924125	HPA:0340462	HPA	ovary; ovarian stroma cells[â‰¥Medium]	10976	472	HPA:0340461	10	3.54882	0.00924125
query_1	TRUE	0.00104105	1022	34	13	0.382353	0.0127202	HPA:0471441	HPA	skin 2; fibrohistiocytic cells[â‰¥Low]	10976	679	HPA:0470000	10	2.98253	0.0127202
query_1	TRUE	0.00110914	711	34	11	0.323529	0.0154712	HPA:0460181	HPA	skin 1; cells in granular layer[â‰¥Low]	10976	609	HPA:0460000	10	2.95501	0.0154712
query_1	TRUE	0.00112427	712	34	11	0.323529	0.0154494	HPA:0461471	HPA	skin 1; lymphocytes[â‰¥Low]	10976	639	HPA:0460000	10	2.94913	0.0154494
query_1	TRUE	0.00189898	7171	34	33	0.970588	0.00460187	HPA:0090000	HPA	cerebellum	10976	103	HPA:0000000	10	2.72148	0.00460187
query_1	TRUE	0.00192614	3965	34	25	0.735294	0.00630517	HPA:0340461	HPA	ovary; ovarian stroma cells[â‰¥Low]	10976	471	HPA:0340000	10	2.71531	0.00630517
query_1	TRUE	0.0029646	638	34	10	0.294118	0.015674	HPA:0470202	HPA	skin 2; endothelial cells[â‰¥Medium]	10976	671	HPA:0470201	10	2.52803	0.015674
query_1	TRUE	0.00594512	5596	34	29	0.852941	0.00518227	HPA:0351181	HPA	pancreas; pancreatic endocrine cells[â‰¥Low]	10976	478	HPA:0350000	10	2.22584	0.00518227
query_1	TRUE	0.0065603	1028	34	12	0.352941	0.0116732	HPA:0630223	HPA	cervix; squamous epithelial cells[High]	10976	207	HPA:0630222	10	2.18308	0.0116732
query_1	TRUE	0.00692769	4552	34	26	0.764706	0.00571178	HPA:0080121	HPA	caudate; glial cells[â‰¥Low]	10976	91	HPA:0080000	10	2.15941	0.00571178
query_1	TRUE	0.00708108	3918	34	24	0.705882	0.00612557	HPA:0010000	HPA	adipose tissue	10976	2	HPA:0000000	10	2.1499	0.00612557
query_1	TRUE	0.00708108	3918	34	24	0.705882	0.00612557	HPA:0010011	HPA	adipose tissue; adipocytes[â‰¥Low]	10976	3	HPA:0010000	10	2.1499	0.00612557
query_1	TRUE	0.00810019	5668	34	29	0.852941	0.00511644	HPA:0180052	HPA	epididymis; glandular cells[â‰¥Medium]	10976	297	HPA:0180051	10	2.0915	0.00511644
query_1	TRUE	0.00814397	4930	34	27	0.794118	0.00547667	HPA:0600222	HPA	tonsil; squamous epithelial cells[â‰¥Medium]	10976	825	HPA:0600221	10	2.08916	0.00547667
query_1	TRUE	0.011127	592	34	9	0.264706	0.0152027	HPA:0460202	HPA	skin 1; endothelial cells[â‰¥Medium]	10976	619	HPA:0460201	10	1.95362	0.0152027
query_1	TRUE	0.0194953	248	34	6	0.176471	0.0241935	HPA:0470183	HPA	skin 2; cells in granular layer[High]	10976	663	HPA:0470182	10	1.71007	0.0241935
query_1	TRUE	0.0196936	4789	34	26	0.764706	0.00542911	HPA:0390052	HPA	prostate; glandular cells[â‰¥Medium]	10976	516	HPA:0390051	10	1.70568	0.00542911
query_1	TRUE	0.0207051	1993	34	16	0.470588	0.0080281	HPA:0250122	HPA	hippocampus; glial cells[â‰¥Medium]	10976	358	HPA:0250121	10	1.68392	0.0080281
query_1	TRUE	0.0207169	155	34	5	0.147059	0.0322581	HPA:0131333	HPA	colon; mucosal lymphoid cells[High]	10976	239	HPA:0131332	10	1.68367	0.0322581
query_1	TRUE	0.0223952	648	34	9	0.264706	0.0138889	HPA:0471472	HPA	skin 2; lymphocytes[â‰¥Medium]	10976	689	HPA:0471471	10	1.64985	0.0138889
query_1	TRUE	0.0261026	4856	34	26	0.764706	0.0053542	HPA:0170052	HPA	endometrium 2; glandular cells[â‰¥Medium]	10976	293	HPA:0170051	10	1.58332	0.0053542
query_1	TRUE	0.0278114	165	34	5	0.147059	0.030303	HPA:0461482	HPA	skin 1; sebaceous glands[â‰¥Medium]	10976	646	HPA:0461481	10	1.55578	0.030303
query_1	TRUE	0.0291677	834	34	10	0.294118	0.0119904	HPA:0471442	HPA	skin 2; fibrohistiocytic cells[â‰¥Medium]	10976	680	HPA:0471441	10	1.5351	0.0119904
query_1	TRUE	0.0310532	4898	34	26	0.764706	0.00530829	HPA:0100121	HPA	cerebral cortex; glial cells[â‰¥Low]	10976	186	HPA:0100000	10	1.50789	0.00530829
query_1	TRUE	0.0348118	92	34	4	0.117647	0.0434783	HPA:0030433	HPA	appendix; germinal center cells[High]	10976	37	HPA:0030432	10	1.45827	0.0434783
query_1	TRUE	0.0394482	698	34	9	0.264706	0.012894	HPA:0461442	HPA	skin 1; fibrohistiocytic cells[â‰¥Medium]	10976	628	HPA:0461441	10	1.40397	0.012894
query_1	TRUE	0.0423926	3704	34	22	0.647059	0.00593952	HPA:0630222	HPA	cervix; squamous epithelial cells[â‰¥Medium]	10976	206	HPA:0630221	10	1.37271	0.00593952
query_1	TRUE	6.3401e-08	169	25	9	0.36	0.0532544	KEGG:04141	KEGG	Protein processing in endoplasmic reticulum	8014	259	KEGG:00000	10	7.1979	0.0532544
query_1	TRUE	0.000118101	69	25	5	0.2	0.0724638	KEGG:04612	KEGG	Antigen processing and presentation	8014	302	KEGG:00000	10	3.92775	0.0724638
query_1	TRUE	0.00161884	57	25	4	0.16	0.0701754	KEGG:05134	KEGG	Legionellosis	8014	410	KEGG:00000	10	2.79079	0.0701754
query_1	TRUE	0.00243378	214	25	6	0.24	0.0280374	KEGG:05417	KEGG	Lipid and atherosclerosis	8014	473	KEGG:00000	10	2.61372	0.0280374
query_1	TRUE	0.00340501	137	25	5	0.2	0.0364964	KEGG:04915	KEGG	Estrogen signaling pathway	8014	351	KEGG:00000	10	2.46788	0.0364964
query_1	TRUE	0.00461408	146	25	5	0.2	0.0342466	KEGG:03040	KEGG	Spliceosome	8014	211	KEGG:00000	10	2.33592	0.0342466
query_1	TRUE	7.14796e-06	1556	35	17	0.485714	0.0109254	MIRNA:hsa-miR-16-5p	MIRNA	hsa-miR-16-5p	14830	289	MIRNA:000000	10	5.14582	0.0109254
query_1	TRUE	0.00377725	118	35	5	0.142857	0.0423729	MIRNA:hsa-miR-4309	MIRNA	hsa-miR-4309	14830	988	MIRNA:000000	10	2.42282	0.0423729
query_1	TRUE	0.00410048	120	35	5	0.142857	0.0416667	MIRNA:hsa-miR-3198	MIRNA	hsa-miR-3198	14830	644	MIRNA:000000	10	2.38717	0.0416667
query_1	TRUE	0.00993813	144	35	5	0.142857	0.0347222	MIRNA:hsa-miR-551b-5p	MIRNA	hsa-miR-551b-5p	14830	1745	MIRNA:000000	10	2.0027	0.0347222
query_1	TRUE	0.0164979	160	35	5	0.142857	0.03125	MIRNA:hsa-miR-361-5p	MIRNA	hsa-miR-361-5p	14830	710	MIRNA:000000	10	1.78257	0.03125
query_1	TRUE	0.0202504	167	35	5	0.142857	0.0299401	MIRNA:hsa-miR-7-2-3p	MIRNA	hsa-miR-7-2-3p	14830	2398	MIRNA:000000	10	1.69357	0.0299401
query_1	TRUE	0.0236718	760	35	9	0.257143	0.0118421	MIRNA:hsa-miR-15b-5p	MIRNA	hsa-miR-15b-5p	14830	286	MIRNA:000000	10	1.62577	0.0118421
query_1	TRUE	0.025318	88	35	4	0.114286	0.0454545	MIRNA:hsa-miR-2115-3p	MIRNA	hsa-miR-2115-3p	14830	408	MIRNA:000000	10	1.59657	0.0454545
query_1	TRUE	0.0289457	180	35	5	0.142857	0.0277778	MIRNA:hsa-miR-7-1-3p	MIRNA	hsa-miR-7-1-3p	14830	2397	MIRNA:000000	10	1.53842	0.0277778
query_1	TRUE	0.0385694	98	35	4	0.114286	0.0408163	MIRNA:hsa-miR-4724-5p	MIRNA	hsa-miR-4724-5p	14830	1328	MIRNA:000000	10	1.41376	0.0408163
query_1	TRUE	8.70246e-16	87	30	12	0.4	0.137931	REAC:R-HSA-3371556	REAC	Cellular response to heat stress	10760	316	REAC:R-HSA-2262752	10	15.0604	0.137931
query_1	TRUE	3.31237e-11	67	30	9	0.3	0.134328	REAC:R-HSA-3371453	REAC	Regulation of HSF1-mediated heat shock response	10760	1835	REAC:R-HSA-3371556	10	10.4799	0.134328
query_1	TRUE	2.59812e-10	14	30	6	0.2	0.428571	REAC:R-HSA-3371568	REAC	Attenuation phase	10760	180	REAC:R-HSA-3371571	10	9.58534	0.428571
query_1	TRUE	6.3375e-10	57	30	8	0.266667	0.140351	REAC:R-HSA-3371497	REAC	HSP90 chaperone cycle for steroid hormone receptors (SHR) in the presence of ligand	10760	1025	REAC:R-HSA-2262752	10	9.19808	0.140351
query_1	TRUE	1.14239e-08	24	30	6	0.2	0.25	REAC:R-HSA-3371571	REAC	HSF1-dependent transactivation	10760	1024	REAC:R-HSA-3371556	10	7.94218	0.25
query_1	TRUE	7.28624e-08	751	30	15	0.5	0.0199734	REAC:R-HSA-2262752	REAC	Cellular responses to stress	10760	320	REAC:R-HSA-8953897	10	7.1375	0.0199734
query_1	TRUE	9.45091e-08	765	30	15	0.5	0.0196078	REAC:R-HSA-8953897	REAC	Cellular responses to stimuli	10760	319	REAC:0000000	10	7.02453	0.0196078
query_1	TRUE	0.00134738	12	30	3	0.1	0.25	REAC:R-HSA-3371511	REAC	HSF1 activation	10760	1023	REAC:R-HSA-3371556	10	2.87051	0.25
query_1	TRUE	0.00791966	217	30	6	0.2	0.0276498	REAC:R-HSA-8939211	REAC	ESR-mediated signaling	10760	774	REAC:R-HSA-9006931	10	2.10129	0.0276498
query_1	TRUE	0.00925575	22	30	3	0.1	0.136364	REAC:R-HSA-9613829	REAC	Chaperone Mediated Autophagy	10760	324	REAC:R-HSA-9612973	10	2.03359	0.136364
query_1	TRUE	0.0356517	6	30	2	0.0666667	0.333333	REAC:R-HSA-8937144	REAC	Aryl hydrocarbon receptor signalling	10760	162	REAC:R-HSA-211945	10	1.44792	0.333333
query_1	TRUE	0.0356517	6	30	2	0.0666667	0.333333	REAC:R-HSA-3000484	REAC	Scavenging by Class F Receptors	10760	2000	REAC:R-HSA-2173782	10	1.44792	0.333333
query_1	TRUE	0.0356517	6	30	2	0.0666667	0.333333	REAC:R-HSA-5336415	REAC	Uptake and function of diphtheria toxin	10760	2427	REAC:R-HSA-5339562	10	1.44792	0.333333
query_1	TRUE	0.0406373	291	30	6	0.2	0.0206186	REAC:R-HSA-9006931	REAC	Signaling by Nuclear Receptors	10760	2105	REAC:R-HSA-162582	10	1.39107	0.0206186
query_1	TRUE	2.40551e-14	89	39	11	0.282051	0.123596	TF:M11655_1	TF	Factor: HSF1; motif: NGAANGTTCKRGAAN; match class: 1	19959	4135	TF:M11655	10	13.6188	0.123596
query_1	TRUE	4.03084e-14	250	39	14	0.358974	0.056	TF:M09950_1	TF	Factor: HSF1; motif: NRGAANNTTCYRGAA; match class: 1	19959	4131	TF:M09950	10	13.3946	0.056
query_1	TRUE	4.11234e-14	1192	39	22	0.564103	0.0184564	TF:M11655	TF	Factor: HSF1; motif: NGAANGTTCKRGAAN	19959	4134	TF:M00000	10	13.3859	0.0184564
query_1	TRUE	4.2639e-14	251	39	14	0.358974	0.0557769	TF:M01023_1	TF	Factor: HSF1; motif: NTTCTRGAAVNTTCTYM; match class: 1	19959	4145	TF:M01023	10	13.3702	0.0557769
query_1	TRUE	2.67646e-13	216	39	13	0.333333	0.0601852	TF:M11656_1	TF	Factor: HSF1; motif: RGAANRTTCYRGAAN; match class: 1	19959	4137	TF:M11656	10	12.5724	0.0601852
query_1	TRUE	3.77065e-13	1324	39	22	0.564103	0.0166163	TF:M11654	TF	Factor: HSF1; motif: RGAANRTTCYRGAAN	19959	4132	TF:M00000	10	12.4236	0.0166163
query_1	TRUE	6.88261e-13	491	39	16	0.410256	0.0325866	TF:M07100_1	TF	Factor: HSF1; motif: NTTCTRGAANNTTCY; match class: 1	19959	4129	TF:M07100	10	12.1622	0.0325866
query_1	TRUE	1.87363e-11	109	39	10	0.25641	0.0917431	TF:M11654_1	TF	Factor: HSF1; motif: RGAANRTTCYRGAAN; match class: 1	19959	4133	TF:M11654	10	10.7273	0.0917431
query_1	TRUE	2.09304e-10	2028	39	23	0.589744	0.0113412	TF:M11656	TF	Factor: HSF1; motif: RGAANRTTCYRGAAN	19959	4136	TF:M00000	10	9.67922	0.0113412
query_1	TRUE	2.16838e-09	333	39	12	0.307692	0.036036	TF:M11657	TF	Factor: HSF1; motif: NGAANRTTCKAGAAN	19959	4138	TF:M00000	10	8.66387	0.036036
query_1	TRUE	5.44476e-09	268	39	11	0.282051	0.0410448	TF:M11662	TF	Factor: HSF2; motif: RGAANGTTCYRGAAN	19959	4158	TF:M00000	10	8.26402	0.0410448
query_1	TRUE	2.17333e-08	11	39	5	0.128205	0.454545	TF:M11662_1	TF	Factor: HSF2; motif: RGAANGTTCYRGAAN; match class: 1	19959	4159	TF:M11662	10	7.66287	0.454545
query_1	TRUE	1.19365e-07	3361	39	25	0.641026	0.00743826	TF:M07100	TF	Factor: HSF1; motif: NTTCTRGAANNTTCY	19959	4128	TF:M00000	10	6.92312	0.00743826
query_1	TRUE	1.301e-07	182	39	9	0.230769	0.0494505	TF:M04010	TF	Factor: HSF4; motif: TTCTAGAANNTTC	19959	4166	TF:M00000	10	6.88572	0.0494505
query_1	TRUE	1.43273e-07	2479	39	22	0.564103	0.00887455	TF:M09950	TF	Factor: HSF1; motif: NRGAANNTTCYRGAA	19959	4130	TF:M00000	10	6.84384	0.00887455
query_1	TRUE	3.07392e-07	390	39	11	0.282051	0.0282051	TF:M11658	TF	Factor: HSF4; motif: RGAANNTTCYRGAAN	19959	4168	TF:M00000	10	6.51231	0.0282051
query_1	TRUE	7.20068e-07	20	39	5	0.128205	0.25	TF:M11658_1	TF	Factor: HSF4; motif: RGAANNTTCYRGAAN; match class: 1	19959	4169	TF:M11658	10	6.14263	0.25
query_1	TRUE	1.31449e-06	333	39	10	0.25641	0.03003	TF:M11659	TF	Factor: HSF4; motif: NGAANRTTCTAGAAN	19959	4170	TF:M00000	10	5.88124	0.03003
query_1	TRUE	1.8006e-06	746	39	13	0.333333	0.0174263	TF:M07259_1	TF	Factor: HSF1; motif: TCYAGAANNTTC; match class: 1	19959	4141	TF:M07259	10	5.74458	0.0174263
query_1	TRUE	2.2487e-06	352	39	10	0.25641	0.0284091	TF:M04008	TF	Factor: HSF1; motif: TTCTAGAAYNTTC	19959	4126	TF:M00000	10	5.64807	0.0284091
query_1	TRUE	6.26824e-06	2703	39	21	0.538462	0.00776915	TF:M01023	TF	Factor: HSF1; motif: NTTCTRGAAVNTTCTYM	19959	4144	TF:M00000	10	5.20285	0.00776915
query_1	TRUE	8.89498e-06	537	39	11	0.282051	0.0204842	TF:M02017_1	TF	Factor: HSF1; motif: GAANNTTCTRGNAN; match class: 1	19959	4147	TF:M02017	10	5.05086	0.0204842
query_1	TRUE	1.59233e-05	568	39	11	0.282051	0.0193662	TF:M01244	TF	Factor: HSF2; motif: GAANRTTCTAGAA	19959	4150	TF:M00000	10	4.79797	0.0193662
query_1	TRUE	3.63576e-05	15	39	4	0.102564	0.266667	TF:M11657_1	TF	Factor: HSF1; motif: NGAANRTTCKAGAAN; match class: 1	19959	4139	TF:M11657	10	4.4394	0.266667
query_1	TRUE	5.57766e-05	4076	39	24	0.615385	0.00588813	TF:M02017	TF	Factor: HSF1; motif: GAANNTTCTRGNAN	19959	4146	TF:M00000	10	4.25355	0.00588813
query_1	TRUE	0.000248548	432	39	9	0.230769	0.0208333	TF:M07459_1	TF	Factor: HSF1; motif: GAANNTTCTNGN; match class: 1	19959	4143	TF:M07459	10	3.60459	0.0208333
query_1	TRUE	0.000757477	5897	39	27	0.692308	0.0045786	TF:M00147	TF	Factor: HSF2; motif: NGAANNWTCK	19959	4148	TF:M00000	10	3.12063	0.0045786
query_1	TRUE	0.00171659	4443	39	23	0.589744	0.00517668	TF:M00147_1	TF	Factor: HSF2; motif: NGAANNWTCK; match class: 1	19959	4149	TF:M00147	10	2.76533	0.00517668
query_1	TRUE	0.00537745	14	39	3	0.0769231	0.214286	TF:M04008_1	TF	Factor: HSF1; motif: TTCTAGAAYNTTC; match class: 1	19959	4127	TF:M04008	10	2.26942	0.214286
query_1	TRUE	0.00537745	14	39	3	0.0769231	0.214286	TF:M11659_1	TF	Factor: HSF4; motif: NGAANRTTCTAGAAN; match class: 1	19959	4171	TF:M11659	10	2.26942	0.214286
query_1	TRUE	0.00622786	115	39	5	0.128205	0.0434783	TF:M08392_1	TF	Factor: A-Myb:TBR2; motif: NNGTGNNNAACGG; match class: 1	19959	5321	TF:M08392	10	2.20566	0.0434783
query_1	TRUE	0.00666498	4780	39	23	0.589744	0.00481172	TF:M07259	TF	Factor: HSF1; motif: TCYAGAANNTTC	19959	4140	TF:M00000	10	2.1762	0.00481172
query_1	TRUE	0.0151954	5419	39	24	0.615385	0.00442886	TF:M02056	TF	Factor: ELF4; motif: NCCGGAARTN	19959	1768	TF:M00000	10	1.81829	0.00442886
query_1	TRUE	0.015799	64	39	4	0.102564	0.0625	TF:M11660	TF	Factor: HSF2; motif: RGAAYRTTCYRGAAN	19959	4154	TF:M00000	10	1.80137	0.0625
query_1	TRUE	0.0258221	7930	39	29	0.74359	0.003657	TF:M03976_1	TF	Factor: ERG; motif: ACCGGAWATCCGGT; match class: 1	19959	2019	TF:M03976	10	1.58801	0.003657
query_1	TRUE	0.0267892	3610	39	19	0.487179	0.00526316	TF:M00641	TF	Factor: HSF; motif: TTCCMGARGYTTC	19959	4200	TF:M00000	10	1.57204	0.00526316
query_1	TRUE	0.0278234	576	39	8	0.205128	0.0138889	TF:M07358	TF	Factor: HSF2; motif: NGGAATNTTCTNGNRN	19959	4164	TF:M00000	10	1.55559	0.0138889
query_1	TRUE	0.0334765	25	39	3	0.0769231	0.12	TF:M01244_1	TF	Factor: HSF2; motif: GAANRTTCTAGAA; match class: 1	19959	4151	TF:M01244	10	1.47526	0.12
query_1	TRUE	0.0139846	346	43	6	0.139535	0.017341	GO:0099572	GO:CC	postsynaptic specialization	21672	3787	GO:0043226|GO:0098794	11	1.85435	0.017341
query_1	TRUE	0.0117008	239	19	5	0.263158	0.0209205	KEGG:04020	KEGG	Calcium signaling pathway	8014	231	KEGG:00000	11	1.93178	0.0209205
query_1	TRUE	0.0336025	69	19	3	0.157895	0.0434783	KEGG:04924	KEGG	Renin secretion	8014	360	KEGG:00000	11	1.47363	0.0434783
query_1	TRUE	0.033813	166	19	4	0.210526	0.0240964	KEGG:04022	KEGG	cGMP-PKG signaling pathway	8014	232	KEGG:00000	11	1.47092	0.0240964
query_1	TRUE	0.0463551	77	19	3	0.157895	0.038961	KEGG:05412	KEGG	Arrhythmogenic right ventricular cardiomyopathy	8014	469	KEGG:00000	11	1.3339	0.038961
query_1	TRUE	5.72038e-05	1010	48	14	0.291667	0.0138614	GO:0000902	GO:BP	cell morphogenesis	21029	306	GO:0009653	12	4.24258	0.0138614
query_1	TRUE	0.00348184	512	48	9	0.1875	0.0175781	GO:0007264	GO:BP	small GTPase mediated signal transduction	21029	3157	GO:0035556	12	2.45819	0.0175781
query_1	TRUE	0.0136282	2074	48	16	0.333333	0.00771456	GO:0006928	GO:BP	movement of cell or subcellular component	21029	2868	GO:0009987	12	1.86556	0.00771456
query_1	TRUE	0.0162252	619	48	9	0.1875	0.0145396	GO:0048812	GO:BP	neuron projection morphogenesis	21029	15117	GO:0031175|GO:0120039	12	1.78981	0.0145396
query_1	TRUE	0.0196484	634	48	9	0.1875	0.0141956	GO:0120039	GO:BP	plasma membrane bounded cell projection morphogenesis	21029	22798	GO:0048858	12	1.70667	0.0141956
query_1	TRUE	0.0206594	638	48	9	0.1875	0.0141066	GO:0048858	GO:BP	cell projection morphogenesis	21029	15162	GO:0000902|GO:0030030|GO:0032990	12	1.68488	0.0141066
query_1	TRUE	0.0208485	62	48	4	0.0833333	0.0645161	GO:0046579	GO:BP	positive regulation of Ras protein signal transduction	21029	14226	GO:0007265|GO:0046578|GO:0051057	12	1.68093	0.0645161
query_1	TRUE	0.0260932	657	48	9	0.1875	0.0136986	GO:0032990	GO:BP	cell part morphogenesis	21029	9186	GO:0032989	12	1.58347	0.0136986
query_1	TRUE	0.030482	6425	48	29	0.604167	0.00451362	GO:0051179	GO:BP	localization	21029	15663	GO:0008150	12	1.51596	0.00451362
query_1	TRUE	0.031756	1479	48	13	0.270833	0.00878972	GO:0120036	GO:BP	plasma membrane bounded cell projection organization	21029	22797	GO:0030030	12	1.49817	0.00878972
query_1	TRUE	0.0357707	71	48	4	0.0833333	0.056338	GO:0051057	GO:BP	positive regulation of small GTPase mediated signal transduction	21029	15563	GO:0007264|GO:0051056|GO:1902533	12	1.44647	0.056338
query_1	TRUE	0.0427362	1521	48	13	0.270833	0.00854701	GO:0030030	GO:BP	cell projection organization	21029	7682	GO:0016043	12	1.3692	0.00854701
query_1	TRUE	0.00287744	839	48	10	0.208333	0.011919	GO:0070161	GO:CC	anchoring junction	21672	2761	GO:0030054	12	2.54099	0.011919
query_1	TRUE	0.0156002	12193	48	40	0.833333	0.00328057	GO:0005737	GO:CC	cytoplasm	21672	384	GO:0005622|GO:0110165	12	1.80687	0.00328057
query_1	TRUE	0.0256907	2076	48	14	0.291667	0.00674374	GO:0030054	GO:CC	cell junction	21672	1025	GO:0110165	12	1.59022	0.00674374
query_1	TRUE	0.0387842	6181	48	26	0.541667	0.00420644	GO:0071944	GO:CC	cell periphery	21672	3128	GO:0110165	12	1.41135	0.00420644
query_1	TRUE	0.00196819	262	33	7	0.212121	0.0267176	HPA:0090991	HPA	cerebellum; molecular layer - neuropil[â‰¥Low]	10976	146	HPA:0090000	12	2.70593	0.0267176
query_1	TRUE	0.00372306	289	33	7	0.212121	0.0242215	HPA:0091071	HPA	cerebellum; white matter cells - cytoplasm/membrane[â‰¥Low]	10976	176	HPA:0090000	12	2.4291	0.0242215
query_1	TRUE	0.00513286	120	33	5	0.151515	0.0416667	HPA:0091073	HPA	cerebellum; white matter cells - cytoplasm/membrane[High]	10976	178	HPA:0091072	12	2.28964	0.0416667
query_1	TRUE	0.00884935	223	33	6	0.181818	0.0269058	HPA:0091072	HPA	cerebellum; white matter cells - cytoplasm/membrane[â‰¥Medium]	10976	177	HPA:0091071	12	2.05309	0.0269058
query_1	TRUE	0.0245003	74	33	4	0.121212	0.0540541	REAC:R-HSA-9013408	REAC	RHOG GTPase cycle	10760	1732	REAC:R-HSA-9012999	12	1.61083	0.0540541
query_1	TRUE	0.000210388	6797	47	34	0.723404	0.00500221	TF:M12722_1	TF	Factor: ZXDL; motif: GSGSCNNGGGMRGCNCCGGGS; match class: 1	19959	11641	TF:M12722	12	3.67698	0.00500221
query_1	TRUE	0.0179071	7194	47	32	0.680851	0.00444815	TF:M00695_1	TF	Factor: ETF; motif: GVGGMGG; match class: 1	19959	2161	TF:M00695	12	1.74697	0.00444815
query_1	TRUE	0.0289724	12692	47	43	0.914894	0.00338796	TF:M00333_1	TF	Factor: ZF5; motif: NRNGNGCGCGCWN; match class: 1	19959	9225	TF:M00333	12	1.53802	0.00338796
query_1	TRUE	0.028997	10489	47	39	0.829787	0.00371818	TF:M04869_1	TF	Factor: Egr-1; motif: GCGCATGCG; match class: 1	19959	1607	TF:M04869	12	1.53765	0.00371818
query_1	TRUE	1.69357e-06	687	44	13	0.295455	0.0189229	GO:0034330	GO:BP	cell junction organization	21029	9855	GO:0016043	13	5.7712	0.0189229
query_1	TRUE	0.000103486	1364	44	15	0.340909	0.0109971	GO:0030182	GO:BP	neuron differentiation	21029	7736	GO:0030154|GO:0048699	13	3.98512	0.0109971
query_1	TRUE	0.000166779	1010	44	13	0.295455	0.0128713	GO:0000902	GO:BP	cell morphogenesis	21029	306	GO:0009653	13	3.77786	0.0128713
query_1	TRUE	0.000340829	420	44	9	0.204545	0.0214286	GO:0034329	GO:BP	cell junction assembly	21029	9854	GO:0022607|GO:0034330	13	3.46746	0.0214286
query_1	TRUE	0.000354786	422	44	9	0.204545	0.021327	GO:0050808	GO:BP	synapse organization	21029	15352	GO:0034330	13	3.45003	0.021327
query_1	TRUE	0.000423853	1519	44	15	0.340909	0.00987492	GO:0048699	GO:BP	generation of neurons	21029	15013	GO:0022008	13	3.37278	0.00987492
query_1	TRUE	0.000548016	749	44	11	0.25	0.0146862	GO:0032989	GO:BP	cellular component morphogenesis	21029	9185	GO:0009653|GO:0016043|GO:0048869	13	3.26121	0.0146862
query_1	TRUE	0.000878414	619	44	10	0.227273	0.0161551	GO:0048812	GO:BP	neuron projection morphogenesis	21029	15117	GO:0031175|GO:0120039	13	3.0563	0.0161551
query_1	TRUE	0.000937038	142	44	6	0.136364	0.0422535	GO:0048813	GO:BP	dendrite morphogenesis	21029	15118	GO:0016358|GO:0048667|GO:0048812	13	3.02824	0.0422535
query_1	TRUE	0.00109313	634	44	10	0.227273	0.0157729	GO:0120039	GO:BP	plasma membrane bounded cell projection morphogenesis	21029	22798	GO:0048858	13	2.96133	0.0157729
query_1	TRUE	0.00112961	1639	44	15	0.340909	0.00915192	GO:0022008	GO:BP	neurogenesis	21029	7550	GO:0007399|GO:0030154	13	2.94707	0.00915192
query_1	TRUE	0.00115765	638	44	10	0.227273	0.015674	GO:0048858	GO:BP	cell projection morphogenesis	21029	15162	GO:0000902|GO:0030030|GO:0032990	13	2.93642	0.015674
query_1	TRUE	0.0013052	80	44	5	0.113636	0.0625	GO:0097061	GO:BP	dendritic spine organization	21029	21648	GO:0099173|GO:0106027	13	2.88432	0.0625
query_1	TRUE	0.00151195	657	44	10	0.227273	0.0152207	GO:0032990	GO:BP	cell part morphogenesis	21029	9186	GO:0032989	13	2.82046	0.0152207
query_1	TRUE	0.00222241	89	44	5	0.113636	0.0561798	GO:0106027	GO:BP	neuron projection organization	21029	22522	GO:0120036	13	2.65318	0.0561798
query_1	TRUE	0.00337197	718	44	10	0.227273	0.0139276	GO:0000904	GO:BP	cell morphogenesis involved in differentiation	21029	308	GO:0000902|GO:0048468	13	2.47212	0.0139276
query_1	TRUE	0.00350871	1104	44	12	0.272727	0.0108696	GO:0048666	GO:BP	neuron development	21029	14981	GO:0030182|GO:0048468	13	2.45485	0.0108696
query_1	TRUE	0.00369532	559	44	9	0.204545	0.0161002	GO:0048667	GO:BP	cell morphogenesis involved in neuron differentiation	21029	14982	GO:0000904|GO:0048666	13	2.43235	0.0161002
query_1	TRUE	0.00529951	432	44	8	0.181818	0.0185185	GO:0010975	GO:BP	regulation of neuron projection development	21029	5094	GO:0031175|GO:0120035	13	2.27576	0.0185185
query_1	TRUE	0.0055696	2685	44	18	0.409091	0.00670391	GO:0009653	GO:BP	anatomical structure morphogenesis	21029	4023	GO:0032502|GO:0048856	13	2.25418	0.00670391
query_1	TRUE	0.00582386	953	44	11	0.25	0.0115425	GO:0031175	GO:BP	neuron projection development	21029	8222	GO:0048666|GO:0120036	13	2.23479	0.0115425
query_1	TRUE	0.00663987	2428	44	17	0.386364	0.00700165	GO:0007399	GO:BP	nervous system development	21029	3278	GO:0048731	13	2.17784	0.00700165
query_1	TRUE	0.00689768	200	44	6	0.136364	0.03	GO:1901888	GO:BP	regulation of cell junction assembly	21029	25155	GO:0034329|GO:0044087|GO:0051128	13	2.1613	0.03
query_1	TRUE	0.0134145	59	44	4	0.0909091	0.0677966	GO:0060997	GO:BP	dendritic spine morphogenesis	21029	17763	GO:0031175|GO:0048812|GO:0048813|GO:0060996|GO:0097061	13	1.87243	0.0677966
query_1	TRUE	0.0173883	235	44	6	0.136364	0.0255319	GO:0016358	GO:BP	dendrite development	21029	5811	GO:0031175|GO:0048856	13	1.75974	0.0255319
query_1	TRUE	0.0318194	926	44	10	0.227273	0.0107991	GO:0022603	GO:BP	regulation of anatomical structure morphogenesis	21029	7601	GO:0009653|GO:0050793	13	1.49731	0.0107991
query_1	TRUE	0.0430398	163	44	5	0.113636	0.0306748	GO:0099173	GO:BP	postsynapse organization	21029	22317	GO:0016043|GO:0050808	13	1.36613	0.0306748
query_1	TRUE	8.1221e-07	2076	43	19	0.44186	0.00915222	GO:0030054	GO:CC	cell junction	21672	1025	GO:0110165	13	6.09033	0.00915222
query_1	TRUE	5.10328e-06	613	43	11	0.255814	0.0179445	GO:0098794	GO:CC	postsynapse	21672	3622	GO:0045202|GO:0110165	13	5.29215	0.0179445
query_1	TRUE	2.75337e-05	1305	43	14	0.325581	0.010728	GO:0045202	GO:CC	synapse	21672	2443	GO:0030054	13	4.56013	0.010728
query_1	TRUE	4.78207e-05	322	43	8	0.186047	0.0248447	GO:0014069	GO:CC	postsynaptic density	21672	823	GO:0032279|GO:0099572	13	4.32038	0.0248447
query_1	TRUE	5.50414e-05	328	43	8	0.186047	0.0243902	GO:0032279	GO:CC	asymmetric synapse	21672	1507	GO:0098984	13	4.25931	0.0243902
query_1	TRUE	8.25937e-05	346	43	8	0.186047	0.0231214	GO:0099572	GO:CC	postsynaptic specialization	21672	3787	GO:0043226|GO:0098794	13	4.08305	0.0231214
query_1	TRUE	9.40835e-05	352	43	8	0.186047	0.0227273	GO:0098984	GO:CC	neuron to neuron synapse	21672	3700	GO:0045202	13	4.02649	0.0227273
query_1	TRUE	0.00100764	2312	43	16	0.372093	0.00692042	GO:0042995	GO:CC	cell projection	21672	2089	GO:0110165	13	2.99669	0.00692042
query_1	TRUE	0.00190426	1347	43	12	0.27907	0.00890869	GO:0043005	GO:CC	neuron projection	21672	2090	GO:0120025	13	2.72027	0.00890869
query_1	TRUE	0.00279999	2205	43	15	0.348837	0.00680272	GO:0120025	GO:CC	plasma membrane bounded cell projection	21672	3858	GO:0042995	13	2.55284	0.00680272
query_1	TRUE	0.0176632	6132	29	26	0.896552	0.00424005	HPA:0080131	HPA	caudate; neuronal cells[â‰¥Low]	10976	94	HPA:0080000	13	1.75293	0.00424005
query_1	TRUE	0.00299705	172	40	6	0.15	0.0348837	MIRNA:hsa-miR-548as-3p	MIRNA	hsa-miR-548as-3p	14830	1685	MIRNA:000000	13	2.52331	0.0348837
query_1	TRUE	0.0162039	2575	42	17	0.404762	0.00660194	TF:M07329_1	TF	Factor: Osx; motif: CCNCCCCCNNN; match class: 1	19959	6211	TF:M07329	13	1.79038	0.00660194
query_1	TRUE	0.0400967	7289	42	29	0.690476	0.0039786	TF:M02023	TF	Factor: MAZ; motif: NKGGGAGGGGRGGR	19959	4996	TF:M00000	13	1.39689	0.0039786
query_1	TRUE	0.0475743	56	35	3	0.0857143	0.0535714	GO:0008146	GO:MF	sulfotransferase activity	20166	1999	GO:0016782	14	1.32263	0.0535714
query_1	TRUE	0.0167173	6	21	2	0.0952381	0.333333	REAC:R-HSA-8857538	REAC	PTK6 promotes HIF1A stabilization	10760	1580	REAC:R-HSA-8848021	14	1.77683	0.333333
query_1	TRUE	0.0163861	2428	38	15	0.394737	0.00617792	GO:0007399	GO:BP	nervous system development	21029	3278	GO:0048731	15	1.78552	0.00617792
query_1	TRUE	0.0210021	25	38	3	0.0789474	0.12	GO:0035235	GO:BP	ionotropic glutamate receptor signaling pathway	21029	10262	GO:0007215|GO:1990806	15	1.67774	0.12
query_1	TRUE	0.0210021	25	38	3	0.0789474	0.12	GO:1990806	GO:BP	ligand-gated ion channel signaling pathway	21029	29138	GO:0007165	15	1.67774	0.12
query_1	TRUE	0.0266427	27	38	3	0.0789474	0.111111	GO:0060314	GO:BP	regulation of ryanodine-sensitive calcium-release channel activity	21029	17104	GO:0051279|GO:1901019|GO:2001257	15	1.57442	0.111111
query_1	TRUE	0.0331999	29	38	3	0.0789474	0.103448	GO:0010880	GO:BP	regulation of release of sequestered calcium ion into cytosol by sarcoplasmic reticulum	21029	5003	GO:0014808|GO:0051279	15	1.47886	0.103448
query_1	TRUE	0.0332532	1639	38	12	0.315789	0.00732154	GO:0022008	GO:BP	neurogenesis	21029	7550	GO:0007399|GO:0030154	15	1.47817	0.00732154
query_1	TRUE	0.0493259	33	38	3	0.0789474	0.0909091	GO:0014808	GO:BP	release of sequestered calcium ion into cytosol by sarcoplasmic reticulum	21029	5240	GO:0070296|GO:1903514	15	1.30693	0.0909091
query_1	TRUE	0.000145344	173	39	6	0.153846	0.0346821	GO:0043197	GO:CC	dendritic spine	21672	2112	GO:0030425|GO:0044309|GO:0098794	15	3.8376	0.0346821
query_1	TRUE	0.000160748	176	39	6	0.153846	0.0340909	GO:0044309	GO:CC	neuron spine	21672	2314	GO:0043005	15	3.79385	0.0340909
query_1	TRUE	0.00259301	613	39	8	0.205128	0.0130506	GO:0098794	GO:CC	postsynapse	21672	3622	GO:0045202|GO:0110165	15	2.5862	0.0130506
query_1	TRUE	0.00296016	1305	39	11	0.282051	0.00842912	GO:0045202	GO:CC	synapse	21672	2443	GO:0030054	15	2.52868	0.00842912
query_1	TRUE	0.00313357	835	39	9	0.230769	0.0107784	GO:0036477	GO:CC	somatodendritic compartment	21672	1960	GO:0110165	15	2.50396	0.0107784
query_1	TRUE	0.0040967	6181	39	24	0.615385	0.00388287	GO:0071944	GO:CC	cell periphery	21672	3128	GO:0110165	15	2.38757	0.00388287
query_1	TRUE	0.00517833	322	39	6	0.153846	0.0186335	GO:0014069	GO:CC	postsynaptic density	21672	823	GO:0032279|GO:0099572	15	2.28581	0.0186335
query_1	TRUE	0.00574454	328	39	6	0.153846	0.0182927	GO:0032279	GO:CC	asymmetric synapse	21672	1507	GO:0098984	15	2.24074	0.0182927
query_1	TRUE	0.00754106	514	39	7	0.179487	0.0136187	GO:0043235	GO:CC	receptor complex	21672	2131	GO:0032991	15	2.12257	0.0136187
query_1	TRUE	0.00774929	346	39	6	0.153846	0.017341	GO:0099572	GO:CC	postsynaptic specialization	21672	3787	GO:0043226|GO:0098794	15	2.11074	0.017341
query_1	TRUE	0.00853037	352	39	6	0.153846	0.0170455	GO:0098984	GO:CC	neuron to neuron synapse	21672	3700	GO:0045202	15	2.06903	0.0170455
query_1	TRUE	0.00959333	2076	39	13	0.333333	0.00626204	GO:0030054	GO:CC	cell junction	21672	1025	GO:0110165	15	2.01803	0.00626204
query_1	TRUE	0.011877	40	39	3	0.0769231	0.075	GO:0008328	GO:CC	ionotropic glutamate receptor complex	21672	620	GO:0005887|GO:0034702|GO:0098878	15	1.92529	0.075
query_1	TRUE	0.0137661	42	39	3	0.0769231	0.0714286	GO:0098878	GO:CC	neurotransmitter receptor complex	21672	3662	GO:0098802	15	1.86119	0.0714286
query_1	TRUE	0.0150075	5694	39	22	0.564103	0.00386372	GO:0005886	GO:CC	plasma membrane	21672	514	GO:0016020|GO:0071944	15	1.82369	0.00386372
query_1	TRUE	0.0226569	612	39	7	0.179487	0.0114379	GO:0030425	GO:CC	dendrite	21672	1099	GO:0043005|GO:0097447	15	1.6448	0.0114379
query_1	TRUE	0.0231223	614	39	7	0.179487	0.0114007	GO:0097447	GO:CC	dendritic tree	21672	3353	GO:0036477|GO:0043005	15	1.63597	0.0114007
query_1	TRUE	0.0396597	292	39	5	0.128205	0.0171233	GO:0034702	GO:CC	ion channel complex	21672	1768	GO:1902495	15	1.40165	0.0171233
query_1	TRUE	0.0023622	19	38	3	0.0789474	0.157895	GO:0004970	GO:MF	ionotropic glutamate receptor activity	20166	1501	GO:0008066|GO:0022824	15	2.62668	0.157895
query_1	TRUE	0.00705661	27	38	3	0.0789474	0.111111	GO:0008066	GO:MF	glutamate receptor activity	20166	1943	GO:0004888	15	2.1514	0.111111
query_1	TRUE	0.00834512	4	38	2	0.0526316	0.5	GO:0004971	GO:MF	AMPA glutamate receptor activity	20166	1502	GO:0004970|GO:0099094	15	2.07857	0.5
query_1	TRUE	0.00283355	262	24	6	0.25	0.0229008	HPA:0090991	HPA	cerebellum; molecular layer - neuropil[â‰¥Low]	10976	146	HPA:0090000	15	2.54767	0.0229008
query_1	TRUE	0.019713	228	24	5	0.208333	0.0219298	HPA:0091062	HPA	cerebellum; synaptic glomeruli - core[â‰¥Medium]	10976	174	HPA:0091061	15	1.70525	0.0219298
query_1	TRUE	0.0164903	59	18	3	0.166667	0.0508475	KEGG:04730	KEGG	Long-term depression	8014	339	KEGG:00000	15	1.78277	0.0508475
query_1	TRUE	0.026206	69	18	3	0.166667	0.0434783	KEGG:05031	KEGG	Amphetamine addiction	8014	398	KEGG:00000	15	1.5816	0.0434783
query_1	TRUE	0.00100025	13	25	3	0.12	0.230769	REAC:R-HSA-416993	REAC	Trafficking of GluR2-containing AMPA receptors	10760	2340	REAC:R-HSA-399719	15	2.99989	0.230769
query_1	TRUE	0.00993859	4	25	2	0.08	0.5	REAC:R-HSA-399710	REAC	Activation of AMPA receptors	10760	68	REAC:R-HSA-399721	15	2.00268	0.5
query_1	TRUE	0.0100124	27	25	3	0.12	0.111111	REAC:R-HSA-399719	REAC	Trafficking of AMPA receptors	10760	2339	REAC:R-HSA-399721	15	1.99946	0.111111
query_1	TRUE	0.0100124	27	25	3	0.12	0.111111	REAC:R-HSA-399721	REAC	Glutamate binding, activation of AMPA receptors and synaptic plasticity	10760	975	REAC:R-HSA-112314	15	1.99946	0.111111
query_1	TRUE	0.0161741	42	20	3	0.15	0.0714286	WP:WP2636	WP	Common pathways underlying drug addiction	7806	532	WP:000000	15	1.79118	0.0714286
query_1	TRUE	0.0498271	1	6	1	0.166667	1	CORUM:6358	CORUM	Glutamate receptor 7 complex, metabotropic	3627	2075	CORUM:0000000	16	1.30253	1
query_1	TRUE	6.18979e-08	2428	37	21	0.567568	0.00864909	GO:0007399	GO:BP	nervous system development	21029	3278	GO:0048731	16	7.20832	0.00864909
query_1	TRUE	1.62795e-07	704	37	13	0.351351	0.0184659	GO:0098916	GO:BP	anterograde trans-synaptic signaling	21029	22182	GO:0099537	16	6.78836	0.0184659
query_1	TRUE	1.62795e-07	704	37	13	0.351351	0.0184659	GO:0007268	GO:BP	chemical synaptic transmission	21029	3161	GO:0098916	16	6.78836	0.0184659
query_1	TRUE	1.87152e-07	712	37	13	0.351351	0.0182584	GO:0099537	GO:BP	trans-synaptic signaling	21029	22352	GO:0099536	16	6.7278	0.0182584
query_1	TRUE	2.81557e-07	736	37	13	0.351351	0.017663	GO:0099536	GO:BP	synaptic signaling	21029	22351	GO:0007267	16	6.55043	0.017663
query_1	TRUE	2.46085e-06	1519	37	16	0.432432	0.0105332	GO:0048699	GO:BP	generation of neurons	21029	15013	GO:0022008	16	5.60891	0.0105332
query_1	TRUE	6.77696e-06	602	37	11	0.297297	0.0182724	GO:0007610	GO:BP	behavior	21029	3472	GO:0008150	16	5.16896	0.0182724
query_1	TRUE	7.40519e-06	1639	37	16	0.432432	0.00976205	GO:0022008	GO:BP	neurogenesis	21029	7550	GO:0007399|GO:0030154	16	5.13046	0.00976205
query_1	TRUE	3.78923e-05	1104	37	13	0.351351	0.0117754	GO:0048666	GO:BP	neuron development	21029	14981	GO:0030182|GO:0048468	16	4.42145	0.0117754
query_1	TRUE	5.2285e-05	1364	37	14	0.378378	0.0102639	GO:0030182	GO:BP	neuron differentiation	21029	7736	GO:0030154|GO:0048699	16	4.28162	0.0102639
query_1	TRUE	5.91286e-05	422	37	9	0.243243	0.021327	GO:0050808	GO:BP	synapse organization	21029	15352	GO:0034330	16	4.2282	0.021327
query_1	TRUE	7.81954e-05	436	37	9	0.243243	0.0206422	GO:0050804	GO:BP	modulation of chemical synaptic transmission	21029	15348	GO:0007268|GO:0099177	16	4.10682	0.0206422
query_1	TRUE	7.97427e-05	437	37	9	0.243243	0.020595	GO:0099177	GO:BP	regulation of trans-synaptic signaling	21029	22321	GO:0010646|GO:0023051|GO:0099537	16	4.09831	0.020595
query_1	TRUE	8.26253e-05	200	37	7	0.189189	0.035	GO:0007626	GO:BP	locomotory behavior	21029	3488	GO:0007610	16	4.08289	0.035
query_1	TRUE	0.000540791	1646	37	14	0.378378	0.00850547	GO:0007267	GO:BP	cell-cell signaling	21029	3160	GO:0007154|GO:0023052	16	3.26697	0.00850547
query_1	TRUE	0.00195573	199	37	6	0.162162	0.0301508	GO:0048167	GO:BP	regulation of synaptic plasticity	21029	14606	GO:0050804|GO:0065008	16	2.70869	0.0301508
query_1	TRUE	0.00355367	687	37	9	0.243243	0.0131004	GO:0034330	GO:BP	cell junction organization	21029	9855	GO:0016043	16	2.44932	0.0131004
query_1	TRUE	0.00360071	53	37	4	0.108108	0.0754717	GO:0007215	GO:BP	glutamate receptor signaling pathway	21029	3115	GO:0007166	16	2.44361	0.0754717
query_1	TRUE	0.00429894	126	37	5	0.135135	0.0396825	GO:0048593	GO:BP	camera-type eye morphogenesis	21029	14917	GO:0043010|GO:0048592	16	2.36664	0.0396825
query_1	TRUE	0.00635283	61	37	4	0.108108	0.0655738	GO:0060042	GO:BP	retina morphogenesis in camera-type eye	21029	16874	GO:0009653|GO:0048593|GO:0060041	16	2.19703	0.0655738
query_1	TRUE	0.008408	1486	37	12	0.324324	0.00807537	GO:0050877	GO:BP	nervous system process	21029	15408	GO:0003008	16	2.07531	0.00807537
query_1	TRUE	0.00880386	5114	37	22	0.594595	0.00430192	GO:0007275	GO:BP	multicellular organism development	21029	3168	GO:0032501|GO:0048856	16	2.05533	0.00430192
query_1	TRUE	0.00892981	2079	37	14	0.378378	0.00673401	GO:0048468	GO:BP	cell development	21029	14819	GO:0030154|GO:0048856|GO:0048869	16	2.04916	0.00673401
query_1	TRUE	0.0129691	4784	37	21	0.567568	0.00438963	GO:0048731	GO:BP	system development	21029	15045	GO:0007275|GO:0048856	16	1.88709	0.00438963
query_1	TRUE	0.0137805	74	37	4	0.108108	0.0540541	GO:0003407	GO:BP	neural retina development	21029	1976	GO:0048856|GO:0060041	16	1.86074	0.0540541
query_1	TRUE	0.0141501	5718	37	23	0.621622	0.00402239	GO:0048856	GO:BP	anatomical structure development	21029	15160	GO:0032502	16	1.84924	0.00402239
query_1	TRUE	0.015593	164	37	5	0.135135	0.0304878	GO:0048592	GO:BP	eye morphogenesis	21029	14916	GO:0001654|GO:0090596	16	1.80707	0.0304878
query_1	TRUE	0.0204477	26	37	3	0.0810811	0.115385	GO:0010842	GO:BP	retina layer formation	21029	4978	GO:0003407|GO:0048646|GO:0060042	16	1.68936	0.115385
query_1	TRUE	0.0272685	3741	37	18	0.486486	0.00481155	GO:0065008	GO:BP	regulation of biological quality	21029	18629	GO:0065007	16	1.56434	0.00481155
query_1	TRUE	0.0494658	953	37	9	0.243243	0.00944386	GO:0031175	GO:BP	neuron projection development	21029	8222	GO:0048666|GO:0120036	16	1.3057	0.00944386
query_1	TRUE	1.50369e-11	1305	38	19	0.5	0.0145594	GO:0045202	GO:CC	synapse	21672	2443	GO:0030054	16	10.8228	0.0145594
query_1	TRUE	5.97957e-09	373	38	11	0.289474	0.0294906	GO:0097060	GO:CC	synaptic membrane	21672	3243	GO:0045202|GO:0098590	16	8.22333	0.0294906
query_1	TRUE	5.3585e-08	2076	38	19	0.5	0.00915222	GO:0030054	GO:CC	cell junction	21672	1025	GO:0110165	16	7.27096	0.00915222
query_1	TRUE	2.01059e-06	493	38	10	0.263158	0.020284	GO:0098793	GO:CC	presynapse	21672	3621	GO:0045202|GO:0110165	16	5.69668	0.020284
query_1	TRUE	2.36277e-06	835	38	12	0.315789	0.0143713	GO:0036477	GO:CC	somatodendritic compartment	21672	1960	GO:0110165	16	5.62658	0.0143713
query_1	TRUE	4.48338e-06	273	38	8	0.210526	0.029304	GO:0045211	GO:CC	postsynaptic membrane	21672	2445	GO:0097060|GO:0098794	16	5.34839	0.029304
query_1	TRUE	6.28468e-06	1347	38	14	0.368421	0.0103935	GO:0043005	GO:CC	neuron projection	21672	2090	GO:0120025	16	5.20172	0.0103935
query_1	TRUE	1.5666e-05	613	38	10	0.263158	0.0163132	GO:0098794	GO:CC	postsynapse	21672	3622	GO:0045202|GO:0110165	16	4.80504	0.0163132
query_1	TRUE	2.00439e-05	2312	38	17	0.447368	0.00735294	GO:0042995	GO:CC	cell projection	21672	2089	GO:0110165	16	4.69802	0.00735294
query_1	TRUE	0.000110507	90	38	5	0.131579	0.0555556	GO:0098839	GO:CC	postsynaptic density membrane	21672	3643	GO:0014069|GO:0099634	16	3.95661	0.0555556
query_1	TRUE	0.000170614	1237	38	12	0.315789	0.00970089	GO:0098590	GO:CC	plasma membrane region	21672	3579	GO:0005886|GO:0016020	16	3.76799	0.00970089
query_1	TRUE	0.000187597	612	38	9	0.236842	0.0147059	GO:0030425	GO:CC	dendrite	21672	1099	GO:0043005|GO:0097447	16	3.72677	0.0147059
query_1	TRUE	0.000192751	614	38	9	0.236842	0.014658	GO:0097447	GO:CC	dendritic tree	21672	3353	GO:0036477|GO:0043005	16	3.715	0.014658
query_1	TRUE	0.000346643	332	38	7	0.184211	0.0210843	GO:0098978	GO:CC	glutamatergic synapse	21672	3694	GO:0045202	16	3.46012	0.0210843
query_1	TRUE	0.00042456	118	38	5	0.131579	0.0423729	GO:0099634	GO:CC	postsynaptic specialization membrane	21672	3793	GO:0045211|GO:0097060|GO:0099572	16	3.37206	0.0423729
query_1	TRUE	0.00198232	5694	38	23	0.605263	0.00403934	GO:0005886	GO:CC	plasma membrane	21672	514	GO:0016020|GO:0071944	16	2.70283	0.00403934
query_1	TRUE	0.00247317	2205	38	14	0.368421	0.00634921	GO:0120025	GO:CC	plasma membrane bounded cell projection	21672	3858	GO:0042995	16	2.60675	0.00634921
query_1	TRUE	0.00468232	328	38	6	0.157895	0.0182927	GO:0032279	GO:CC	asymmetric synapse	21672	1507	GO:0098984	16	2.32954	0.0182927
query_1	TRUE	0.0069596	352	38	6	0.157895	0.0170455	GO:0098984	GO:CC	neuron to neuron synapse	21672	3700	GO:0045202	16	2.15742	0.0170455
query_1	TRUE	0.0085263	6181	38	23	0.605263	0.00372108	GO:0071944	GO:CC	cell periphery	21672	3128	GO:0110165	16	2.06924	0.00372108
query_1	TRUE	0.0138934	7	38	2	0.0526316	0.285714	GO:0048788	GO:CC	cytoskeleton of presynaptic active zone	21672	2551	GO:0030863|GO:0098831|GO:0099569	16	1.85719	0.285714
query_1	TRUE	0.0257258	144	38	4	0.105263	0.0277778	GO:0042734	GO:CC	presynaptic membrane	21672	2078	GO:0097060|GO:0098793	16	1.58963	0.0277778
query_1	TRUE	0.0263458	1713	38	11	0.289474	0.00642148	GO:0031226	GO:CC	intrinsic component of plasma membrane	21672	1237	GO:0005886|GO:0031224	16	1.57929	0.00642148
query_1	TRUE	0.0296728	10	38	2	0.0526316	0.2	GO:0099569	GO:CC	presynaptic cytoskeleton	21672	3785	GO:0005856|GO:0098793	16	1.52764	0.2
query_1	TRUE	0.0420589	488	38	6	0.157895	0.0122951	GO:0043025	GO:CC	neuronal cell body	21672	2092	GO:0036477|GO:0044297	16	1.37614	0.0122951
query_1	TRUE	0.0434275	165	38	4	0.105263	0.0242424	GO:0099240	GO:CC	intrinsic component of synaptic membrane	21672	3771	GO:0031226|GO:0097060	16	1.36224	0.0242424
query_1	TRUE	6.47876e-05	27	37	4	0.108108	0.148148	GO:0008066	GO:MF	glutamate receptor activity	20166	1943	GO:0004888	16	4.18851	0.148148
query_1	TRUE	0.00389497	3	37	2	0.0540541	0.666667	GO:0099583	GO:MF	neurotransmitter receptor activity involved in regulation of postsynaptic cytosolic calcium ion concentration	20166	10453	GO:0098960	16	2.4095	0.666667
query_1	TRUE	0.0171567	107	37	4	0.108108	0.0373832	GO:0030594	GO:MF	neurotransmitter receptor activity	20166	4896	GO:0038023	16	1.76557	0.0373832
query_1	TRUE	0.0464162	9	37	2	0.0540541	0.222222	GO:0098988	GO:MF	G protein-coupled glutamate receptor activity	20166	10416	GO:0004930|GO:0008066	16	1.33333	0.222222
query_1	TRUE	0.0464162	9	37	2	0.0540541	0.222222	GO:0001640	GO:MF	adenylate cyclase inhibiting G protein-coupled glutamate receptor activity	20166	297	GO:0098988	16	1.33333	0.222222
query_1	TRUE	0.00257557	218	15	7	0.466667	0.0321101	HP:0011146	HP	Dialeptic seizure	4667	7594	HP:0001250	16	2.58913	0.0321101
query_1	TRUE	0.00349393	469	15	9	0.6	0.0191898	HP:0000736	HP	Short attention span	4667	575	HP:0000708	16	2.45669	0.0191898
query_1	TRUE	0.00408918	344	15	8	0.533333	0.0232558	HP:0001336	HP	Myoclonus	4667	1013	HP:0004305	16	2.38836	0.0232558
query_1	TRUE	0.00436781	347	15	8	0.533333	0.0230548	HP:0002197	HP	Generalized-onset seizure	4667	1623	HP:0001250	16	2.35974	0.0230548
query_1	TRUE	0.00596894	247	15	7	0.466667	0.0283401	HP:0100660	HP	Dyskinesia	4667	15150	HP:0100022	16	2.2241	0.0283401
query_1	TRUE	0.00627472	364	15	8	0.533333	0.021978	HP:0007018	HP	Attention deficit hyperactivity disorder	4667	4568	HP:0000736|HP:0000752	16	2.20241	0.021978
query_1	TRUE	0.00770246	515	15	9	0.6	0.0174757	HP:0000752	HP	Hyperactivity	4667	590	HP:0000708	16	2.11337	0.0174757
query_1	TRUE	0.00798866	258	15	7	0.466667	0.0271318	HP:0011198	HP	EEG with generalized epileptiform discharges	4667	7641	HP:0011182	16	2.09753	0.0271318
query_1	TRUE	0.0128676	177	15	6	0.4	0.0338983	HP:0002121	HP	Generalized non-motor (absence) seizure	4667	1566	HP:0002197|HP:0011146|HP:0033259	16	1.8905	0.0338983
query_1	TRUE	0.0164429	105	15	5	0.333333	0.047619	HP:0200134	HP	Epileptic encephalopathy	4667	15511	HP:0001298	16	1.78402	0.047619
query_1	TRUE	0.0182253	188	15	6	0.4	0.0319149	HP:0002521	HP	Hypsarrhythmia	4667	1834	HP:0011198	16	1.73933	0.0319149
query_1	TRUE	0.0198987	296	15	7	0.466667	0.0236486	HP:0011182	HP	Interictal epileptiform activity	4667	7625	HP:0025373	16	1.70118	0.0236486
query_1	TRUE	0.0199647	191	15	6	0.4	0.0314136	HP:0033259	HP	Non-motor seizure	4667	13212	HP:0001250	16	1.69974	0.0314136
query_1	TRUE	0.0208034	298	15	7	0.466667	0.0234899	HP:0025373	HP	Interictal EEG abnormality	4667	9841	HP:0002353	16	1.68187	0.0234899
query_1	TRUE	0.0227163	302	15	7	0.466667	0.0231788	HP:0007359	HP	Focal-onset seizure	4667	4723	HP:0001250	16	1.64366	0.0231788
query_1	TRUE	0.0231624	196	15	6	0.4	0.0306122	HP:0002133	HP	Status epilepticus	4667	1572	HP:0001250	16	1.63522	0.0306122
query_1	TRUE	0.0254543	775	15	10	0.666667	0.0129032	HP:0012444	HP	Brain atrophy	4667	8867	HP:0007367|HP:0012443	16	1.59424	0.0129032
query_1	TRUE	0.0407194	629	15	9	0.6	0.0143084	HP:0000729	HP	Autistic behavior	4667	570	HP:0000708	16	1.3902	0.0143084
query_1	TRUE	3.09173e-05	40	14	4	0.285714	0.1	KEGG:05033	KEGG	Nicotine addiction	8014	400	KEGG:00000	16	4.5098	0.1
query_1	TRUE	5.80099e-05	114	14	5	0.357143	0.0438596	KEGG:04724	KEGG	Glutamatergic synapse	8014	334	KEGG:00000	16	4.2365	0.0438596
query_1	TRUE	0.000211482	148	14	5	0.357143	0.0337838	KEGG:04723	KEGG	Retrograde endocannabinoid signaling	8014	333	KEGG:00000	16	3.67473	0.0337838
query_1	TRUE	0.000921529	352	14	6	0.428571	0.0170455	KEGG:04080	KEGG	Neuroactive ligand-receptor interaction	8014	244	KEGG:00000	16	3.03549	0.0170455
query_1	TRUE	0.00495723	142	14	4	0.285714	0.028169	KEGG:05017	KEGG	Spinocerebellar ataxia	8014	394	KEGG:00000	16	2.30476	0.028169
query_1	TRUE	0.0114538	67	14	3	0.214286	0.0447761	KEGG:04720	KEGG	Long-term potentiation	8014	330	KEGG:00000	16	1.94105	0.0447761
query_1	TRUE	0.0480041	400	23	6	0.26087	0.015	REAC:R-HSA-112316	REAC	Neuronal System	10760	1465	REAC:0000000	16	1.31872	0.015
query_1	TRUE	0.0352182	3072	38	17	0.447368	0.00553385	TF:M09760_1	TF	Factor: DPF2; motif: NYCACYTCCYCNYYCY; match class: 1	19959	1355	TF:M09760	16	1.45323	0.00553385
query_1	TRUE	0.0100075	42	17	3	0.176471	0.0714286	WP:WP4148	WP	Splicing factor NOVA regulated synaptic proteins	7806	609	WP:000000	16	1.99968	0.0714286
query_1	TRUE	0.0234786	144	17	4	0.235294	0.0277778	WP:WP5083	WP	Neuroinflammation and glutamatergic signaling	7806	538	WP:000000	16	1.62933	0.0277778
query_1	TRUE	0.00148096	829	36	10	0.277778	0.0120627	GO:0032880	GO:BP	regulation of protein localization	21029	9092	GO:0008104|GO:0032879	17	2.82946	0.0120627
query_1	TRUE	0.00409782	1164	36	11	0.305556	0.00945017	GO:1901701	GO:BP	cellular response to oxygen-containing compound	21029	24970	GO:0070887|GO:1901700	17	2.38745	0.00945017
query_1	TRUE	0.0138986	75	36	4	0.111111	0.0533333	GO:0038093	GO:BP	Fc receptor signaling pathway	21029	11189	GO:0002768	17	1.85703	0.0533333
query_1	TRUE	0.0372075	2079	36	13	0.361111	0.00625301	GO:0048468	GO:BP	cell development	21029	14819	GO:0030154|GO:0048856|GO:0048869	17	1.42937	0.00625301
query_1	TRUE	1.96908e-05	2076	37	16	0.432432	0.00770713	GO:0030054	GO:CC	cell junction	21672	1025	GO:0110165	17	4.70574	0.00770713
query_1	TRUE	2.69168e-05	1305	37	13	0.351351	0.00996169	GO:0045202	GO:CC	synapse	21672	2443	GO:0030054	17	4.56998	0.00996169
query_1	TRUE	0.00167128	613	37	8	0.216216	0.0130506	GO:0098794	GO:CC	postsynapse	21672	3622	GO:0045202|GO:0110165	17	2.77695	0.0130506
query_1	TRUE	0.00610416	352	37	6	0.162162	0.0170455	GO:0098984	GO:CC	neuron to neuron synapse	21672	3700	GO:0045202	17	2.21437	0.0170455
query_1	TRUE	0.0170281	2334	37	13	0.351351	0.00556984	GO:0005856	GO:CC	cytoskeleton	21672	491	GO:0043232	17	1.76883	0.00556984
query_1	TRUE	0.0196408	12193	37	32	0.864865	0.00262446	GO:0005737	GO:CC	cytoplasm	21672	384	GO:0005622|GO:0110165	17	1.70684	0.00262446
query_1	TRUE	0.0292713	5373	37	20	0.540541	0.00372232	GO:0005829	GO:CC	cytosol	21672	469	GO:0005737|GO:0110165	17	1.53356	0.00372232
query_1	TRUE	0.0422785	12	37	2	0.0540541	0.166667	GO:1990124	GO:CC	messenger ribonucleoprotein complex	21672	4172	GO:1990904	17	1.37388	0.166667
query_1	TRUE	0.0452765	319	37	5	0.135135	0.015674	GO:0005938	GO:CC	cell cortex	21672	560	GO:0005737|GO:0071944	17	1.34413	0.015674
query_1	TRUE	0.0472848	322	37	5	0.135135	0.015528	GO:0014069	GO:CC	postsynaptic density	21672	823	GO:0032279|GO:0099572	17	1.32528	0.015528
query_1	TRUE	0.0481429	173	37	4	0.108108	0.0231214	GO:0043197	GO:CC	dendritic spine	21672	2112	GO:0030425|GO:0044309|GO:0098794	17	1.31747	0.0231214
query_1	TRUE	0.00311407	14799	38	38	1	0.00256774	GO:0005515	GO:MF	protein binding	20166	1875	GO:0005488	17	2.50667	0.00256774
query_1	TRUE	0.0101893	2610	24	15	0.625	0.00574713	HPA:0100212	HPA	cerebral cortex; neuropil[â‰¥Medium]	10976	196	HPA:0100211	17	1.99185	0.00574713
query_1	TRUE	0.0130976	1993	24	13	0.541667	0.00652283	HPA:0250122	HPA	hippocampus; glial cells[â‰¥Medium]	10976	358	HPA:0250121	17	1.88281	0.00652283
query_1	TRUE	0.0270624	6795	24	23	0.958333	0.00338484	HPA:0250000	HPA	hippocampus	10976	356	HPA:0000000	17	1.56763	0.00338484
query_1	TRUE	0.0413441	6930	24	23	0.958333	0.0033189	HPA:0080000	HPA	caudate	10976	90	HPA:0000000	17	1.38359	0.0033189
query_1	TRUE	0.00380605	102	18	4	0.222222	0.0392157	KEGG:04914	KEGG	Progesterone-mediated oocyte maturation	8014	350	KEGG:00000	17	2.41953	0.0392157
query_1	TRUE	0.0100745	131	18	4	0.222222	0.0305344	KEGG:04114	KEGG	Oocyte meiosis	8014	249	KEGG:00000	17	1.99678	0.0305344
query_1	TRUE	0.000802209	45	30	4	0.133333	0.0888889	GO:0085029	GO:BP	extracellular matrix assembly	21029	20972	GO:0022607|GO:0030198	18	3.09571	0.0888889
query_1	TRUE	0.00196391	15	30	3	0.1	0.2	GO:0070831	GO:BP	basement membrane assembly	21029	19100	GO:0071711|GO:0085029	18	2.70688	0.2
query_1	TRUE	0.00226174	4128	30	18	0.6	0.00436047	GO:0030154	GO:BP	cell differentiation	21029	7722	GO:0048869	18	2.64556	0.00436047
query_1	TRUE	0.00305518	4210	30	18	0.6	0.00427553	GO:0048869	GO:BP	cellular developmental process	21029	15172	GO:0009987|GO:0032502	18	2.51496	0.00427553
query_1	TRUE	0.00836168	712	30	8	0.266667	0.011236	GO:0099537	GO:BP	trans-synaptic signaling	21029	22352	GO:0099536	18	2.07771	0.011236
query_1	TRUE	0.00909032	323	30	6	0.2	0.0185759	GO:0030198	GO:BP	extracellular matrix organization	21029	7744	GO:0043062|GO:0045229	18	2.04142	0.0185759
query_1	TRUE	0.00925271	324	30	6	0.2	0.0185185	GO:0043062	GO:BP	extracellular structure organization	21029	12131	GO:0016043	18	2.03373	0.0185185
query_1	TRUE	0.00958459	326	30	6	0.2	0.0184049	GO:0045229	GO:BP	external encapsulating structure organization	21029	13211	GO:0016043	18	2.01843	0.0184049
query_1	TRUE	0.010669	736	30	8	0.266667	0.0108696	GO:0099536	GO:BP	synaptic signaling	21029	22351	GO:0007267	18	1.97188	0.0108696
query_1	TRUE	0.0147277	1646	30	11	0.366667	0.00668287	GO:0007267	GO:BP	cell-cell signaling	21029	3160	GO:0007154|GO:0023052	18	1.83186	0.00668287
query_1	TRUE	0.0208381	4784	30	18	0.6	0.00376254	GO:0048731	GO:BP	system development	21029	15045	GO:0007275|GO:0048856	18	1.68114	0.00376254
query_1	TRUE	0.0210612	32	30	3	0.1	0.09375	GO:0071711	GO:BP	basement membrane organization	21029	19708	GO:0030198	18	1.67652	0.09375
query_1	TRUE	0.0291471	110	30	4	0.133333	0.0363636	GO:0034446	GO:BP	substrate adhesion-dependent cell spreading	21029	9937	GO:0000904|GO:0031589	18	1.53541	0.0363636
query_1	TRUE	1.96414e-07	6181	32	26	0.8125	0.00420644	GO:0071944	GO:CC	cell periphery	21672	3128	GO:0110165	18	6.70683	0.00420644
query_1	TRUE	2.91678e-07	1305	32	14	0.4375	0.010728	GO:0045202	GO:CC	synapse	21672	2443	GO:0030054	18	6.5351	0.010728
query_1	TRUE	1.43868e-06	2076	32	16	0.5	0.00770713	GO:0030054	GO:CC	cell junction	21672	1025	GO:0110165	18	5.84203	0.00770713
query_1	TRUE	4.56968e-05	835	32	10	0.3125	0.011976	GO:0036477	GO:CC	somatodendritic compartment	21672	1960	GO:0110165	18	4.34011	0.011976
query_1	TRUE	0.000134281	5694	32	22	0.6875	0.00386372	GO:0005886	GO:CC	plasma membrane	21672	514	GO:0016020|GO:0071944	18	3.87198	0.00386372
query_1	TRUE	0.000149491	352	32	7	0.21875	0.0198864	GO:0098984	GO:CC	neuron to neuron synapse	21672	3700	GO:0045202	18	3.82539	0.0198864
query_1	TRUE	0.000257988	560	32	8	0.25	0.0142857	GO:0031012	GO:CC	extracellular matrix	21672	1197	GO:0030312	18	3.5884	0.0142857
query_1	TRUE	0.000261458	561	32	8	0.25	0.0142602	GO:0030312	GO:CC	external encapsulating structure	21672	1093	GO:0071944|GO:0110165	18	3.5826	0.0142602
query_1	TRUE	0.000506544	613	32	8	0.25	0.0130506	GO:0098794	GO:CC	postsynapse	21672	3622	GO:0045202|GO:0110165	18	3.29538	0.0130506
query_1	TRUE	0.00150639	322	32	6	0.1875	0.0186335	GO:0014069	GO:CC	postsynaptic density	21672	823	GO:0032279|GO:0099572	18	2.82206	0.0186335
query_1	TRUE	0.00167387	328	32	6	0.1875	0.0182927	GO:0032279	GO:CC	asymmetric synapse	21672	1507	GO:0098984	18	2.77628	0.0182927
query_1	TRUE	0.00226927	346	32	6	0.1875	0.017341	GO:0099572	GO:CC	postsynaptic specialization	21672	3787	GO:0043226|GO:0098794	18	2.64411	0.017341
query_1	TRUE	0.00246505	2312	32	13	0.40625	0.00562284	GO:0042995	GO:CC	cell projection	21672	2089	GO:0110165	18	2.60817	0.00562284
query_1	TRUE	0.00276145	97	32	4	0.125	0.0412371	GO:0005604	GO:CC	basement membrane	21672	267	GO:0062023	18	2.55886	0.0412371
query_1	TRUE	0.00297405	554	32	7	0.21875	0.0126354	GO:0044297	GO:CC	cell body	21672	2302	GO:0110165	18	2.52665	0.0126354
query_1	TRUE	0.00347469	373	32	6	0.1875	0.0160858	GO:0097060	GO:CC	synaptic membrane	21672	3243	GO:0045202|GO:0098590	18	2.45908	0.0160858
query_1	TRUE	0.00624151	40	32	3	0.09375	0.075	GO:0008328	GO:CC	ionotropic glutamate receptor complex	21672	620	GO:0005887|GO:0034702|GO:0098878	18	2.20471	0.075
query_1	TRUE	0.00686694	421	32	6	0.1875	0.0142518	GO:0062023	GO:CC	collagen-containing extracellular matrix	21672	2675	GO:0031012	18	2.16324	0.0142518
query_1	TRUE	0.00723775	42	32	3	0.09375	0.0714286	GO:0098878	GO:CC	neurotransmitter receptor complex	21672	3662	GO:0098802	18	2.1404	0.0714286
query_1	TRUE	0.0086264	2205	32	12	0.375	0.00544218	GO:0120025	GO:CC	plasma membrane bounded cell projection	21672	3858	GO:0042995	18	2.06417	0.00544218
query_1	TRUE	0.0104501	273	32	5	0.15625	0.018315	GO:0045211	GO:CC	postsynaptic membrane	21672	2445	GO:0097060|GO:0098794	18	1.98088	0.018315
query_1	TRUE	0.0118838	1237	32	9	0.28125	0.00727567	GO:0098590	GO:CC	plasma membrane region	21672	3579	GO:0005886|GO:0016020	18	1.92504	0.00727567
query_1	TRUE	0.0207859	514	32	6	0.1875	0.0116732	GO:0043235	GO:CC	receptor complex	21672	2131	GO:0032991	18	1.68223	0.0116732
query_1	TRUE	0.0221182	165	32	4	0.125	0.0242424	GO:0099240	GO:CC	intrinsic component of synaptic membrane	21672	3771	GO:0031226|GO:0097060	18	1.65525	0.0242424
query_1	TRUE	0.0265552	173	32	4	0.125	0.0231214	GO:0043197	GO:CC	dendritic spine	21672	2112	GO:0030425|GO:0044309|GO:0098794	18	1.57585	0.0231214
query_1	TRUE	0.0265999	1713	32	10	0.3125	0.00583771	GO:0031226	GO:CC	intrinsic component of plasma membrane	21672	1237	GO:0005886|GO:0031224	18	1.57512	0.00583771
query_1	TRUE	0.0283746	176	32	4	0.125	0.0227273	GO:0044309	GO:CC	neuron spine	21672	2314	GO:0043005	18	1.54707	0.0227273
query_1	TRUE	0.0309695	12	32	2	0.0625	0.166667	GO:0043256	GO:CC	laminin complex	21672	2136	GO:0005604|GO:0032991	18	1.50907	0.166667
query_1	TRUE	0.0462632	78	32	3	0.09375	0.0384615	GO:0099060	GO:CC	integral component of postsynaptic specialization membrane	21672	3733	GO:0098948|GO:0099055	18	1.33476	0.0384615
query_1	TRUE	0.00761968	5	30	2	0.0666667	0.4	GO:0015277	GO:MF	kainate selective glutamate receptor activity	20166	3072	GO:0004970|GO:0005267|GO:0005272|GO:0099094	18	2.11806	0.4
query_1	TRUE	0.040939	10	19	2	0.105263	0.2	REAC:R-HSA-451306	REAC	Ionotropic activity of kainate receptors	10760	1183	REAC:R-HSA-451326	18	1.38786	0.2
query_1	TRUE	0.040939	10	19	2	0.105263	0.2	REAC:R-HSA-451308	REAC	Activation of Ca-permeable Kainate Receptor	10760	77	REAC:R-HSA-451306	18	1.38786	0.2
query_1	TRUE	0.042071	58	19	3	0.157895	0.0517241	REAC:R-HSA-3000171	REAC	Non-integrin membrane-ECM interactions	10760	1478	REAC:R-HSA-1474244	18	1.37602	0.0517241
query_1	TRUE	0.0498271	1	6	1	0.166667	1	CORUM:1530	CORUM	Girdin homo-oligomer complex	3627	775	CORUM:0000000	19	1.30253	1
query_1	TRUE	0.0273233	194	34	5	0.147059	0.0257732	GO:0030705	GO:BP	cytoskeleton-dependent intracellular transport	21029	7956	GO:0046907	19	1.56347	0.0257732
query_1	TRUE	4.53962e-06	633	33	10	0.30303	0.0157978	GO:0030424	GO:CC	axon	21672	1098	GO:0043005	19	5.34298	0.0157978
query_1	TRUE	4.61043e-05	2205	33	15	0.454545	0.00680272	GO:0120025	GO:CC	plasma membrane bounded cell projection	21672	3858	GO:0042995	19	4.33626	0.00680272
query_1	TRUE	7.06289e-05	1347	33	12	0.363636	0.00890869	GO:0043005	GO:CC	neuron projection	21672	2090	GO:0120025	19	4.15102	0.00890869
query_1	TRUE	8.58263e-05	2312	33	15	0.454545	0.00648789	GO:0042995	GO:CC	cell projection	21672	2089	GO:0110165	19	4.06638	0.00648789
query_1	TRUE	9.81121e-05	322	33	7	0.212121	0.0217391	GO:0014069	GO:CC	postsynaptic density	21672	823	GO:0032279|GO:0099572	19	4.00828	0.0217391
query_1	TRUE	0.000111075	328	33	7	0.212121	0.0213415	GO:0032279	GO:CC	asymmetric synapse	21672	1507	GO:0098984	19	3.95438	0.0213415
query_1	TRUE	0.000158935	346	33	7	0.212121	0.0202312	GO:0099572	GO:CC	postsynaptic specialization	21672	3787	GO:0043226|GO:0098794	19	3.79878	0.0202312
query_1	TRUE	0.000178312	352	33	7	0.212121	0.0198864	GO:0098984	GO:CC	neuron to neuron synapse	21672	3700	GO:0045202	19	3.74882	0.0198864
query_1	TRUE	0.00107176	2076	33	13	0.393939	0.00626204	GO:0030054	GO:CC	cell junction	21672	1025	GO:0110165	19	2.9699	0.00626204
query_1	TRUE	0.00673484	613	33	7	0.212121	0.0114192	GO:0098794	GO:CC	postsynapse	21672	3622	GO:0045202|GO:0110165	19	2.17167	0.0114192
query_1	TRUE	0.0210816	59	33	3	0.0909091	0.0508475	GO:0044304	GO:CC	main axon	21672	2309	GO:0030424|GO:0110165	19	1.6761	0.0508475
query_1	TRUE	0.022341	1305	33	9	0.272727	0.00689655	GO:0045202	GO:CC	synapse	21672	2443	GO:0030054	19	1.6509	0.00689655
query_1	TRUE	0.0244495	62	33	3	0.0909091	0.0483871	GO:1904115	GO:CC	axon cytoplasm	21672	4077	GO:0030424|GO:0120111	19	1.61173	0.0483871
query_1	TRUE	0.00164999	270	33	6	0.181818	0.0222222	GO:0008017	GO:MF	microtubule binding	20166	1924	GO:0015631	19	2.78252	0.0222222
query_1	TRUE	0.0111439	378	33	6	0.181818	0.015873	GO:0015631	GO:MF	tubulin binding	20166	3350	GO:0008092	19	1.95296	0.015873
query_1	TRUE	0.0401854	629	12	8	0.666667	0.0127186	HP:0000729	HP	Autistic behavior	4667	570	HP:0000708	19	1.39593	0.0127186
query_1	TRUE	0.0178854	592	22	7	0.318182	0.0118243	HPA:0460202	HPA	skin 1; endothelial cells[â‰¥Medium]	10976	619	HPA:0460201	19	1.7475	0.0118243
query_1	TRUE	0.0328935	884	22	8	0.363636	0.00904977	HPA:0461441	HPA	skin 1; fibrohistiocytic cells[â‰¥Low]	10976	627	HPA:0460000	19	1.48289	0.00904977
query_1	TRUE	0.0413548	206	33	5	0.151515	0.0242718	MIRNA:hsa-miR-6867-3p	MIRNA	hsa-miR-6867-3p	14830	2339	MIRNA:000000	19	1.38347	0.0242718
query_1	TRUE	0.0118726	2514	19	13	0.684211	0.00517104	REAC:R-HSA-162582	REAC	Signal Transduction	10760	2030	REAC:0000000	19	1.92545	0.00517104
query_1	TRUE	0.0159346	42	19	3	0.157895	0.0714286	REAC:R-HSA-9696264	REAC	RND3 GTPase cycle	10760	1771	REAC:R-HSA-9012999	19	1.79766	0.0714286
query_1	TRUE	0.0159346	42	19	3	0.157895	0.0714286	REAC:R-HSA-9696273	REAC	RND1 GTPase cycle	10760	1769	REAC:R-HSA-9012999	19	1.79766	0.0714286
query_1	TRUE	0.0254185	444	19	6	0.315789	0.0135135	REAC:R-HSA-9012999	REAC	RHO GTPase cycle	10760	1711	REAC:R-HSA-194315	19	1.59485	0.0135135
query_1	TRUE	0.0365188	697	19	7	0.368421	0.010043	REAC:R-HSA-194315	REAC	Signaling by Rho GTPases	10760	2118	REAC:R-HSA-9716542	19	1.43748	0.010043
query_1	TRUE	0.0417692	712	19	7	0.368421	0.00983146	REAC:R-HSA-9716542	REAC	Signaling by Rho GTPases, Miro GTPases and RHOBTB3	10760	2119	REAC:R-HSA-162582	19	1.37914	0.00983146
query_1	TRUE	0.0153158	8684	33	27	0.818182	0.00310917	TF:M01199	TF	Factor: RNF96; motif: BCCCGCRGCC	19959	7282	TF:M00000	19	1.81486	0.00310917
query_1	TRUE	0.0444498	2914	33	15	0.454545	0.00514756	TF:M10108_1	TF	Factor: WT1; motif: RGGNGGGGGAGGRGGNGGRG; match class: 1	19959	8973	TF:M10108	19	1.35213	0.00514756
query_1	TRUE	0.0181913	1310	31	10	0.322581	0.00763359	GO:0071495	GO:BP	cellular response to endogenous stimulus	21029	19534	GO:0009719	20	1.74014	0.00763359
query_1	TRUE	0.0212711	99	31	4	0.129032	0.040404	GO:0045807	GO:BP	positive regulation of endocytosis	21029	13541	GO:0006897|GO:0030100|GO:0051050|GO:0051130	20	1.67221	0.040404
query_1	TRUE	0.0451441	1454	31	10	0.322581	0.00687758	GO:0016477	GO:BP	cell migration	21029	5822	GO:0048870	20	1.3454	0.00687758
query_1	TRUE	0.000286508	388	32	7	0.21875	0.0180412	GO:0098791	GO:CC	Golgi apparatus subcompartment	21672	3620	GO:0005794|GO:0031984	20	3.54286	0.0180412
query_1	TRUE	0.000329177	1606	32	12	0.375	0.00747198	GO:0005794	GO:CC	Golgi apparatus	21672	437	GO:0005737|GO:0012505|GO:0043231	20	3.48257	0.00747198
query_1	TRUE	0.000864772	4674	32	19	0.59375	0.00406504	GO:0012505	GO:CC	endomembrane system	21672	816	GO:0110165	20	3.0631	0.00406504
query_1	TRUE	0.00107216	1476	32	11	0.34375	0.00745257	GO:0031984	GO:CC	organelle subcompartment	21672	1453	GO:0043227|GO:0043229|GO:0110165	20	2.96974	0.00745257
query_1	TRUE	0.0074417	639	32	7	0.21875	0.0109546	GO:0000139	GO:CC	Golgi membrane	21672	19	GO:0005794|GO:0098588	20	2.12833	0.0109546
query_1	TRUE	0.0321349	2124	32	11	0.34375	0.00517891	GO:0098588	GO:CC	bounding membrane of organelle	21672	3578	GO:0031090	20	1.49302	0.00517891
query_1	TRUE	0.049343	5649	20	18	0.9	0.0031864	HPA:0130201	HPA	colon; endothelial cells[â‰¥Low]	10976	216	HPA:0130000	20	1.30677	0.0031864
query_1	TRUE	0.00134144	216	14	5	0.357143	0.0231481	KEGG:04810	KEGG	Regulation of actin cytoskeleton	8014	345	KEGG:00000	20	2.87243	0.0231481
query_1	TRUE	0.0318231	20	14	2	0.142857	0.1	KEGG:00532	KEGG	Glycosaminoglycan biosynthesis - chondroitin sulfate / dermatan sulfate	8014	77	KEGG:00000	20	1.49726	0.1
query_1	TRUE	0.00369532	9979	35	31	0.885714	0.00310652	TF:M02036	TF	Factor: WT1; motif: CGCCCCCNCN	19959	8978	TF:M00000	20	2.43235	0.00310652
query_1	TRUE	0.00739094	7658	35	27	0.771429	0.00352572	TF:M08878	TF	Factor: EGR; motif: CGCCCCCGCNN	19959	1668	TF:M00000	20	2.1313	0.00352572
query_1	TRUE	0.0106644	6679	35	25	0.714286	0.00374308	TF:M10108	TF	Factor: WT1; motif: RGGNGGGGGAGGRGGNGGRG	19959	8972	TF:M00000	20	1.97206	0.00374308
query_1	TRUE	0.0208931	4490	35	20	0.571429	0.00445434	TF:M10426_1	TF	Factor: ctcf; motif: CCRSCAGGGGGCGCN; match class: 1	19959	1149	TF:M10426	20	1.68	0.00445434
query_1	TRUE	0.0316007	1662	35	12	0.342857	0.00722022	TF:M12569	TF	Factor: CTCFL; motif: NSCAGGGGGCGS	19959	1122	TF:M00000	20	1.5003	0.00722022
query_1	TRUE	0.0385084	4666	35	20	0.571429	0.00428633	TF:M00444_1	TF	Factor: VDR; motif: GGGKNARNRRGGWSA; match class: 1	19959	8927	TF:M00444	20	1.41444	0.00428633
query_1	TRUE	0.0178837	2428	26	12	0.461538	0.00494234	GO:0007399	GO:BP	nervous system development	21029	3278	GO:0048731	21	1.74754	0.00494234
query_1	TRUE	0.0396076	4784	26	16	0.615385	0.00334448	GO:0048731	GO:BP	system development	21029	15045	GO:0007275|GO:0048856	21	1.40222	0.00334448
query_1	TRUE	0.0423501	293	26	5	0.192308	0.0170648	GO:0042063	GO:BP	gliogenesis	21029	11525	GO:0022008	21	1.37315	0.0170648
query_1	TRUE	0.00182139	98	29	4	0.137931	0.0408163	GO:0043202	GO:CC	lysosomal lumen	21672	2114	GO:0005764|GO:0005775	21	2.7396	0.0408163
query_1	TRUE	0.0177295	175	29	4	0.137931	0.0228571	GO:0005775	GO:CC	vacuolar lumen	21672	418	GO:0005773|GO:0070013	21	1.7513	0.0228571
query_1	TRUE	0.0363662	6181	29	18	0.62069	0.00291215	GO:0071944	GO:CC	cell periphery	21672	3128	GO:0110165	21	1.4393	0.00291215
query_1	TRUE	0.00181578	146	23	5	0.217391	0.0342466	HPA:0090992	HPA	cerebellum; molecular layer - neuropil[â‰¥Medium]	10976	147	HPA:0090991	21	2.74094	0.0342466
query_1	TRUE	0.00383129	291	23	6	0.26087	0.0206186	HPA:0091061	HPA	cerebellum; synaptic glomeruli - core[â‰¥Low]	10976	173	HPA:0090000	21	2.41666	0.0206186
query_1	TRUE	0.0053523	89	23	4	0.173913	0.0449438	HPA:0090902	HPA	cerebellum; Bergmann glia - cytoplasm/membrane[â‰¥Medium]	10976	105	HPA:0090901	21	2.27146	0.0449438
query_1	TRUE	0.0106357	106	23	4	0.173913	0.0377358	HPA:0090901	HPA	cerebellum; Bergmann glia - cytoplasm/membrane[â‰¥Low]	10976	104	HPA:0090000	21	1.97324	0.0377358
query_1	TRUE	0.0296996	262	23	5	0.217391	0.019084	HPA:0090991	HPA	cerebellum; molecular layer - neuropil[â‰¥Low]	10976	146	HPA:0090000	21	1.52725	0.019084
query_1	TRUE	0.000110053	8	21	3	0.142857	0.375	REAC:R-HSA-3595177	REAC	Defective CHSY1 causes TPBS	10760	478	REAC:R-HSA-3560782	21	3.9584	0.375
query_1	TRUE	0.000110053	8	21	3	0.142857	0.375	REAC:R-HSA-3595172	REAC	Defective CHST3 causes SEDCJD	10760	476	REAC:R-HSA-3560782	21	3.9584	0.375
query_1	TRUE	0.000110053	8	21	3	0.142857	0.375	REAC:R-HSA-3595174	REAC	Defective CHST14 causes EDS, musculocontractural type	10760	475	REAC:R-HSA-3560782	21	3.9584	0.375
query_1	TRUE	0.000323045	11	21	3	0.142857	0.272727	REAC:R-HSA-2022923	REAC	Dermatan sulfate biosynthesis	10760	687	REAC:R-HSA-1793185	21	3.49074	0.272727
query_1	TRUE	0.000709978	14	21	3	0.142857	0.214286	REAC:R-HSA-2024101	REAC	CS/DS degradation	10760	274	REAC:R-HSA-1793185	21	3.14876	0.214286
query_1	TRUE	0.00187819	19	21	3	0.142857	0.157895	REAC:R-HSA-2022870	REAC	Chondroitin sulfate biosynthesis	10760	332	REAC:R-HSA-1793185	21	2.72626	0.157895
query_1	TRUE	0.00220687	20	21	3	0.142857	0.15	REAC:R-HSA-3560783	REAC	Defective B4GALT7 causes EDS, progeroid type	10760	464	REAC:R-HSA-3560782	21	2.65622	0.15
query_1	TRUE	0.00220687	20	21	3	0.142857	0.15	REAC:R-HSA-3560801	REAC	Defective B3GAT3 causes JDSSDHD	10760	461	REAC:R-HSA-3560782	21	2.65622	0.15
query_1	TRUE	0.00220687	20	21	3	0.142857	0.15	REAC:R-HSA-4420332	REAC	Defective B3GALT6 causes EDSP2 and SEMDJL1	10760	459	REAC:R-HSA-3560782	21	2.65622	0.15
query_1	TRUE	0.00499543	26	21	3	0.142857	0.115385	REAC:R-HSA-1971475	REAC	A tetrasaccharide linker sequence is required for GAG synthesis	10760	3	REAC:R-HSA-1638091|REAC:R-HSA-1793185	21	2.30143	0.115385
query_1	TRUE	0.0200992	41	21	3	0.142857	0.0731707	REAC:R-HSA-3560782	REAC	Diseases associated with glycosaminoglycan metabolism	10760	700	REAC:R-HSA-3781865	21	1.69682	0.0731707
query_1	TRUE	0.0258383	123	21	4	0.190476	0.0325203	REAC:R-HSA-1630316	REAC	Glycosaminoglycan metabolism	10760	994	REAC:R-HSA-71387	21	1.58774	0.0325203
query_1	TRUE	0.034391	49	21	3	0.142857	0.0612245	REAC:R-HSA-1793185	REAC	Chondroitin sulfate/dermatan sulfate metabolism	10760	333	REAC:R-HSA-1630316	21	1.46356	0.0612245
query_1	TRUE	0.0426979	140	21	4	0.190476	0.0285714	REAC:R-HSA-3781865	REAC	Diseases of glycosylation	10760	714	REAC:R-HSA-5668914	21	1.36959	0.0285714
query_1	TRUE	0.0486039	55	21	3	0.142857	0.0545455	REAC:R-HSA-1638091	REAC	Heparan sulfate/heparin (HS-GAG) metabolism	10760	1033	REAC:R-HSA-1630316	21	1.31333	0.0545455
query_1	TRUE	0.000386064	45	25	4	0.16	0.0888889	GO:0030517	GO:BP	negative regulation of axon extension	21029	7894	GO:0030308|GO:0030516|GO:0048640|GO:0048675|GO:0050771	22	3.41334	0.0888889
query_1	TRUE	0.00172646	65	25	4	0.16	0.0615385	GO:0050771	GO:BP	negative regulation of axonogenesis	21029	15323	GO:0007409|GO:0010977|GO:0050768|GO:0050770	22	2.76284	0.0615385
query_1	TRUE	0.00826361	96	25	4	0.16	0.0416667	GO:0030516	GO:BP	regulation of axon extension	21029	7893	GO:0048638|GO:0048675|GO:0061387	22	2.08283	0.0416667
query_1	TRUE	0.0118059	105	25	4	0.16	0.0380952	GO:0048640	GO:BP	negative regulation of developmental growth	21029	14955	GO:0045926|GO:0048589|GO:0048638|GO:0051093	22	1.9279	0.0380952
query_1	TRUE	0.0147204	111	25	4	0.16	0.036036	GO:0061387	GO:BP	regulation of extent of cell growth	21029	18131	GO:0001558|GO:0008361	22	1.83208	0.036036
query_1	TRUE	0.0235552	125	25	4	0.16	0.032	GO:0048675	GO:BP	axon extension	21029	14990	GO:0007409|GO:1990138	22	1.62791	0.032
query_1	TRUE	0.0327574	2685	25	12	0.48	0.00446927	GO:0009653	GO:BP	anatomical structure morphogenesis	21029	4023	GO:0032502|GO:0048856	22	1.48469	0.00446927
query_1	TRUE	0.0328472	136	25	4	0.16	0.0294118	GO:0010977	GO:BP	negative regulation of neuron projection development	21029	5096	GO:0010975|GO:0031175|GO:0031345	22	1.4835	0.0294118
query_1	TRUE	0.0347894	138	25	4	0.16	0.0289855	GO:0050768	GO:BP	negative regulation of neurogenesis	21029	15320	GO:0010721|GO:0022008|GO:0050767|GO:0051961	22	1.45855	0.0289855
query_1	TRUE	0.0375554	46	25	3	0.12	0.0652174	GO:0050919	GO:BP	negative chemotaxis	21029	15447	GO:0006935	22	1.42533	0.0652174
query_1	TRUE	0.0400137	143	25	4	0.16	0.027972	GO:0051961	GO:BP	negative regulation of nervous system development	21029	16237	GO:0007399|GO:0051093|GO:0051241|GO:0051960	22	1.39779	0.027972
query_1	TRUE	0.000335353	2	28	2	0.0714286	1	GO:0072534	GO:CC	perineuronal net	21672	3143	GO:0098966	22	3.4745	1
query_1	TRUE	0.0020089	4	28	2	0.0714286	0.5	GO:0098966	GO:CC	perisynaptic extracellular matrix	21672	3692	GO:0062023|GO:0099535	22	2.69704	0.5
query_1	TRUE	0.0020089	4	28	2	0.0714286	0.5	GO:0099535	GO:CC	synapse-associated extracellular matrix	21672	3782	GO:0062023	22	2.69704	0.5
query_1	TRUE	0.0454614	181	9	3	0.333333	0.0165746	KEGG:04360	KEGG	Axon guidance	8014	285	KEGG:00000	22	1.34236	0.0165746
query_1	TRUE	1.90145e-10	1104	29	16	0.551724	0.0144928	GO:0048666	GO:BP	neuron development	21029	14981	GO:0030182|GO:0048468	23	9.72092	0.0144928
query_1	TRUE	4.87871e-09	1364	29	16	0.551724	0.0117302	GO:0030182	GO:BP	neuron differentiation	21029	7736	GO:0030154|GO:0048699	23	8.3117	0.0117302
query_1	TRUE	1.02873e-08	953	29	14	0.482759	0.0146905	GO:0031175	GO:BP	neuron projection development	21029	8222	GO:0048666|GO:0120036	23	7.9877	0.0146905
query_1	TRUE	1.67036e-08	1479	29	16	0.551724	0.0108181	GO:0120036	GO:BP	plasma membrane bounded cell projection organization	21029	22797	GO:0030030	23	7.77719	0.0108181
query_1	TRUE	2.50252e-08	1519	29	16	0.551724	0.0105332	GO:0048699	GO:BP	generation of neurons	21029	15013	GO:0022008	23	7.60162	0.0105332
query_1	TRUE	2.55285e-08	1521	29	16	0.551724	0.0105194	GO:0030030	GO:BP	cell projection organization	21029	7682	GO:0016043	23	7.59298	0.0105194
query_1	TRUE	7.88351e-08	1639	29	16	0.551724	0.00976205	GO:0022008	GO:BP	neurogenesis	21029	7550	GO:0007399|GO:0030154	23	7.10328	0.00976205
query_1	TRUE	2.19616e-07	2428	29	18	0.62069	0.00741351	GO:0007399	GO:BP	nervous system development	21029	3278	GO:0048731	23	6.65834	0.00741351
query_1	TRUE	2.72333e-06	2079	29	16	0.551724	0.00769601	GO:0048468	GO:BP	cell development	21029	14819	GO:0030154|GO:0048856|GO:0048869	23	5.5649	0.00769601
query_1	TRUE	9.80674e-06	619	29	10	0.344828	0.0161551	GO:0048812	GO:BP	neuron projection morphogenesis	21029	15117	GO:0031175|GO:0120039	23	5.00848	0.0161551
query_1	TRUE	1.2325e-05	634	29	10	0.344828	0.0157729	GO:0120039	GO:BP	plasma membrane bounded cell projection morphogenesis	21029	22798	GO:0048858	23	4.90921	0.0157729
query_1	TRUE	1.30869e-05	638	29	10	0.344828	0.015674	GO:0048858	GO:BP	cell projection morphogenesis	21029	15162	GO:0000902|GO:0030030|GO:0032990	23	4.88316	0.015674
query_1	TRUE	1.73074e-05	657	29	10	0.344828	0.0152207	GO:0032990	GO:BP	cell part morphogenesis	21029	9186	GO:0032989	23	4.76177	0.0152207
query_1	TRUE	5.98949e-05	749	29	10	0.344828	0.0133511	GO:0032989	GO:BP	cellular component morphogenesis	21029	9185	GO:0009653|GO:0016043|GO:0048869	23	4.22261	0.0133511
query_1	TRUE	0.000153342	431	29	8	0.275862	0.0185615	GO:0007409	GO:BP	axonogenesis	21029	3286	GO:0048667|GO:0048812|GO:0061564	23	3.81434	0.0185615
query_1	TRUE	0.00033323	477	29	8	0.275862	0.0167715	GO:0061564	GO:BP	axon development	21029	18272	GO:0031175	23	3.47726	0.0167715
query_1	TRUE	0.000969101	1010	29	10	0.344828	0.00990099	GO:0000902	GO:BP	cell morphogenesis	21029	306	GO:0009653	23	3.01363	0.00990099
query_1	TRUE	0.00111051	559	29	8	0.275862	0.0143113	GO:0048667	GO:BP	cell morphogenesis involved in neuron differentiation	21029	14982	GO:0000904|GO:0048666	23	2.95448	0.0143113
query_1	TRUE	0.00187856	4784	29	19	0.655172	0.00397157	GO:0048731	GO:BP	system development	21029	15045	GO:0007275|GO:0048856	23	2.72617	0.00397157
query_1	TRUE	0.00552843	5114	29	19	0.655172	0.00371529	GO:0007275	GO:BP	multicellular organism development	21029	3168	GO:0032501|GO:0048856	23	2.2574	0.00371529
query_1	TRUE	0.00713659	6411	29	21	0.724138	0.00327562	GO:0023052	GO:BP	signaling	21029	7654	GO:0008150	23	2.14651	0.00327562
query_1	TRUE	0.00720303	718	29	8	0.275862	0.0111421	GO:0000904	GO:BP	cell morphogenesis involved in differentiation	21029	308	GO:0000902|GO:0048468	23	2.14248	0.0111421
query_1	TRUE	0.00989753	336	29	6	0.206897	0.0178571	GO:0031346	GO:BP	positive regulation of cell projection organization	21029	8286	GO:0030030|GO:0031344|GO:0051130	23	2.00447	0.0178571
query_1	TRUE	0.0139223	8815	29	24	0.827586	0.00272263	GO:0050896	GO:BP	response to stimulus	21029	15425	GO:0008150	23	1.85629	0.00272263
query_1	TRUE	0.019827	7474	29	22	0.758621	0.00294354	GO:0032501	GO:BP	multicellular organismal process	21029	8813	GO:0008150	23	1.70274	0.00294354
query_1	TRUE	0.0221514	387	29	6	0.206897	0.0155039	GO:0030900	GO:BP	forebrain development	21029	8052	GO:0007420|GO:0048856	23	1.6546	0.0155039
query_1	TRUE	0.0323639	5718	29	19	0.655172	0.00332284	GO:0048856	GO:BP	anatomical structure development	21029	15160	GO:0032502	23	1.48994	0.00332284
query_1	TRUE	0.0342337	634	29	7	0.241379	0.011041	GO:0031344	GO:BP	regulation of cell projection organization	21029	8284	GO:0030030|GO:0051128	23	1.46555	0.011041
query_1	TRUE	0.0413949	4128	29	16	0.551724	0.00387597	GO:0030154	GO:BP	cell differentiation	21029	7722	GO:0048869	23	1.38305	0.00387597
query_1	TRUE	0.043903	11067	29	26	0.896552	0.00234933	GO:0050794	GO:BP	regulation of cellular process	21029	15340	GO:0009987|GO:0050789	23	1.35751	0.00234933
query_1	TRUE	0.0451092	6465	29	20	0.689655	0.00309358	GO:0007154	GO:BP	cell communication	21029	3056	GO:0009987	23	1.34573	0.00309358
query_1	TRUE	3.03777e-10	1347	29	16	0.551724	0.0118782	GO:0043005	GO:CC	neuron projection	21672	2090	GO:0120025	23	9.51745	0.0118782
query_1	TRUE	2.43797e-09	633	29	12	0.413793	0.0189573	GO:0030424	GO:CC	axon	21672	1098	GO:0043005	23	8.61297	0.0189573
query_1	TRUE	4.21495e-08	2205	29	17	0.586207	0.00770975	GO:0120025	GO:CC	plasma membrane bounded cell projection	21672	3858	GO:0042995	23	7.37521	0.00770975
query_1	TRUE	5.40309e-08	1305	29	14	0.482759	0.010728	GO:0045202	GO:CC	synapse	21672	2443	GO:0030054	23	7.26736	0.010728
query_1	TRUE	8.8928e-08	2312	29	17	0.586207	0.00735294	GO:0042995	GO:CC	cell projection	21672	2089	GO:0110165	23	7.05096	0.00735294
query_1	TRUE	2.24251e-06	2076	29	15	0.517241	0.00722543	GO:0030054	GO:CC	cell junction	21672	1025	GO:0110165	23	5.64927	0.00722543
query_1	TRUE	1.40424e-05	613	29	9	0.310345	0.0146819	GO:0098794	GO:CC	postsynapse	21672	3622	GO:0045202|GO:0110165	23	4.85256	0.0146819
query_1	TRUE	1.44561e-05	163	29	6	0.206897	0.0368098	GO:0030426	GO:CC	growth cone	21672	1100	GO:0030427|GO:0150034	23	4.83995	0.0368098
query_1	TRUE	1.79191e-05	169	29	6	0.206897	0.035503	GO:0030427	GO:CC	site of polarized growth	21672	1101	GO:0110165	23	4.74668	0.035503
query_1	TRUE	6.85961e-05	352	29	7	0.241379	0.0198864	GO:0098984	GO:CC	neuron to neuron synapse	21672	3700	GO:0045202	23	4.1637	0.0198864
query_1	TRUE	0.000299652	273	29	6	0.206897	0.021978	GO:0150034	GO:CC	distal axon	21672	3996	GO:0030424|GO:0110165	23	3.52338	0.021978
query_1	TRUE	0.000777973	322	29	6	0.206897	0.0186335	GO:0014069	GO:CC	postsynaptic density	21672	823	GO:0032279|GO:0099572	23	3.10904	0.0186335
query_1	TRUE	0.000865085	328	29	6	0.206897	0.0182927	GO:0032279	GO:CC	asymmetric synapse	21672	1507	GO:0098984	23	3.06294	0.0182927
query_1	TRUE	0.000927458	332	29	6	0.206897	0.0180723	GO:0098978	GO:CC	glutamatergic synapse	21672	3694	GO:0045202	23	3.03271	0.0180723
query_1	TRUE	0.00117531	346	29	6	0.206897	0.017341	GO:0099572	GO:CC	postsynaptic specialization	21672	3787	GO:0043226|GO:0098794	23	2.92985	0.017341
query_1	TRUE	0.00807558	6181	29	19	0.655172	0.00307394	GO:0071944	GO:CC	cell periphery	21672	3128	GO:0110165	23	2.09283	0.00307394
query_1	TRUE	0.0113127	5694	29	18	0.62069	0.00316122	GO:0005886	GO:CC	plasma membrane	21672	514	GO:0016020|GO:0071944	23	1.94643	0.00316122
query_1	TRUE	0.016444	10	29	2	0.0689655	0.2	GO:0099569	GO:CC	presynaptic cytoskeleton	21672	3785	GO:0005856|GO:0098793	23	1.78399	0.2
query_1	TRUE	0.0194131	835	29	7	0.241379	0.00838323	GO:0036477	GO:CC	somatodendritic compartment	21672	1960	GO:0110165	23	1.71191	0.00838323
query_1	TRUE	0.0200815	11	29	2	0.0689655	0.181818	GO:0005883	GO:CC	neurofilament	21672	511	GO:0005737|GO:0005882	23	1.6972	0.181818
query_1	TRUE	0.0264356	373	29	5	0.172414	0.0134048	GO:0097060	GO:CC	synaptic membrane	21672	3243	GO:0045202|GO:0098590	23	1.57781	0.0134048
query_1	TRUE	0.0342254	1237	29	8	0.275862	0.00646726	GO:0098590	GO:CC	plasma membrane region	21672	3579	GO:0005886|GO:0016020	23	1.46565	0.00646726
query_1	TRUE	0.0435317	221	29	4	0.137931	0.0180995	GO:0034703	GO:CC	cation channel complex	21672	1769	GO:0034702	23	1.36119	0.0180995
query_1	TRUE	0.0011572	21	29	3	0.103448	0.142857	GO:0017075	GO:MF	syntaxin-1 binding	20166	3951	GO:0019905	23	2.93659	0.142857
query_1	TRUE	0.00317854	203	29	5	0.172414	0.0246305	GO:0005516	GO:MF	calmodulin binding	20166	1876	GO:0005515	23	2.49777	0.0246305
query_1	TRUE	0.0193409	724	29	7	0.241379	0.00966851	GO:0005509	GO:MF	calcium ion binding	20166	1873	GO:0046872	23	1.71352	0.00966851
query_1	TRUE	0.0367797	339	29	5	0.172414	0.0147493	GO:0005261	GO:MF	cation channel activity	20166	1738	GO:0005216|GO:0022890	23	1.43439	0.0147493
query_1	TRUE	0.0399331	345	29	5	0.172414	0.0144928	GO:0022836	GO:MF	gated channel activity	20166	4663	GO:0015267	23	1.39867	0.0144928
query_1	TRUE	0.0454247	70	29	3	0.103448	0.0428571	GO:0019905	GO:MF	syntaxin binding	20166	4615	GO:0000149	23	1.34271	0.0428571
query_1	TRUE	0.0499318	190	29	4	0.137931	0.0210526	GO:0008022	GO:MF	protein C-terminus binding	20166	1928	GO:0005515	23	1.30162	0.0210526
query_1	TRUE	0.0174736	181	15	4	0.266667	0.0220994	KEGG:04360	KEGG	Axon guidance	8014	285	KEGG:00000	23	1.75762	0.0220994
query_1	TRUE	0.0229298	78	15	3	0.2	0.0384615	KEGG:04721	KEGG	Synaptic vesicle cycle	8014	331	KEGG:00000	23	1.6396	0.0384615
query_1	TRUE	0.0305693	86	15	3	0.2	0.0348837	KEGG:04911	KEGG	Insulin secretion	8014	347	KEGG:00000	23	1.51471	0.0348837
query_1	TRUE	0.000438384	400	24	8	0.333333	0.02	REAC:R-HSA-112316	REAC	Neuronal System	10760	1465	REAC:0000000	23	3.35815	0.02
query_1	TRUE	0.00507637	259	24	6	0.25	0.023166	REAC:R-HSA-112315	REAC	Transmission across Chemical Synapses	10760	2381	REAC:R-HSA-112316	23	2.29445	0.023166
query_1	TRUE	0.0218105	30	29	3	0.103448	0.1	TF:M06555	TF	Factor: ZNF721; motif: NGGTGTGGGTGC	19959	11132	TF:M00000	23	1.66134	0.1
query_1	TRUE	0.0124649	52	15	3	0.2	0.0576923	WP:WP2267	WP	Synaptic vesicle pathway	7806	593	WP:000000	23	1.90431	0.0576923
query_1	TRUE	0.0276077	13	15	2	0.133333	0.153846	WP:WP3679	WP	Cell-type dependent selectivity of CCK2R signaling	7806	277	WP:000000	23	1.55897	0.153846
query_1	TRUE	0.000378522	784	26	9	0.346154	0.0114796	GO:0032940	GO:BP	secretion by cell	21029	9142	GO:0046903|GO:0140352	24	3.42191	0.0114796
query_1	TRUE	0.000677445	840	26	9	0.346154	0.0107143	GO:0140352	GO:BP	export from cell	21029	23090	GO:0006810|GO:0009987	24	3.16913	0.0107143
query_1	TRUE	0.00150558	924	26	9	0.346154	0.00974026	GO:0046903	GO:BP	secretion	21029	14455	GO:0006810	24	2.8223	0.00974026
query_1	TRUE	0.0136655	12193	26	24	0.923077	0.00196834	GO:0005737	GO:CC	cytoplasm	21672	384	GO:0005622|GO:0110165	24	1.86437	0.00196834
query_1	TRUE	0.0158339	2076	26	10	0.384615	0.00481696	GO:0030054	GO:CC	cell junction	21672	1025	GO:0110165	24	1.80041	0.00481696
query_1	TRUE	0.0196624	1305	26	8	0.307692	0.00613027	GO:0045202	GO:CC	synapse	21672	2443	GO:0030054	24	1.70636	0.00613027
query_1	TRUE	0.0245433	1347	26	8	0.307692	0.00593912	GO:0043005	GO:CC	neuron projection	21672	2090	GO:0120025	24	1.61007	0.00593912
query_1	TRUE	0.0263778	2205	26	10	0.384615	0.00453515	GO:0120025	GO:CC	plasma membrane bounded cell projection	21672	3858	GO:0042995	24	1.57876	0.00453515
query_1	TRUE	0.0392216	2312	26	10	0.384615	0.00432526	GO:0042995	GO:CC	cell projection	21672	2089	GO:0110165	24	1.40647	0.00432526
query_1	TRUE	1.10288e-06	154	11	6	0.545455	0.038961	KEGG:04921	KEGG	Oxytocin signaling pathway	8014	357	KEGG:00000	24	5.95747	0.038961
query_1	TRUE	0.000250007	89	11	4	0.363636	0.0449438	KEGG:04727	KEGG	GABAergic synapse	8014	337	KEGG:00000	24	3.60205	0.0449438
query_1	TRUE	0.000261451	90	11	4	0.363636	0.0444444	KEGG:05032	KEGG	Morphine addiction	8014	399	KEGG:00000	24	3.58261	0.0444444
query_1	TRUE	0.000367538	98	11	4	0.363636	0.0408163	KEGG:04925	KEGG	Aldosterone synthesis and secretion	8014	361	KEGG:00000	24	3.4347	0.0408163
query_1	TRUE	0.000502605	106	11	4	0.363636	0.0377358	KEGG:04928	KEGG	Parathyroid hormone synthesis, secretion and action	8014	364	KEGG:00000	24	3.29877	0.0377358
query_1	TRUE	0.00696245	75	11	3	0.272727	0.04	KEGG:04918	KEGG	Thyroid hormone synthesis	8014	354	KEGG:00000	24	2.15724	0.04
query_1	TRUE	0.00724313	76	11	3	0.272727	0.0394737	KEGG:04971	KEGG	Gastric acid secretion	8014	381	KEGG:00000	24	2.14007	0.0394737
query_1	TRUE	0.0104653	86	11	3	0.272727	0.0348837	KEGG:04911	KEGG	Insulin secretion	8014	347	KEGG:00000	24	1.98025	0.0348837
query_1	TRUE	0.0112047	88	11	3	0.272727	0.0340909	KEGG:04540	KEGG	Gap junction	8014	298	KEGG:00000	24	1.9506	0.0340909
query_1	TRUE	0.0122065	239	11	4	0.363636	0.0167364	KEGG:04020	KEGG	Calcium signaling pathway	8014	231	KEGG:00000	24	1.91341	0.0167364
query_1	TRUE	0.0123764	91	11	3	0.272727	0.032967	KEGG:04970	KEGG	Salivary secretion	8014	380	KEGG:00000	24	1.90741	0.032967
query_1	TRUE	0.0132001	93	11	3	0.272727	0.0322581	KEGG:04912	KEGG	GnRH signaling pathway	8014	348	KEGG:00000	24	1.87942	0.0322581
query_1	TRUE	0.0140588	95	11	3	0.272727	0.0315789	KEGG:05414	KEGG	Dilated cardiomyopathy	8014	470	KEGG:00000	24	1.85205	0.0315789
query_1	TRUE	0.0149529	97	11	3	0.272727	0.0309278	KEGG:04713	KEGG	Circadian entrainment	8014	328	KEGG:00000	24	1.82527	0.0309278
query_1	TRUE	0.0154135	98	11	3	0.272727	0.0306122	KEGG:04750	KEGG	Inflammatory mediator regulation of TRP channels	8014	344	KEGG:00000	24	1.8121	0.0306122
query_1	TRUE	0.0168503	101	11	3	0.272727	0.029703	KEGG:04916	KEGG	Melanogenesis	8014	352	KEGG:00000	24	1.77339	0.029703
query_1	TRUE	0.0173478	102	11	3	0.272727	0.0294118	KEGG:04972	KEGG	Pancreatic secretion	8014	382	KEGG:00000	24	1.76075	0.0294118
query_1	TRUE	0.0228553	112	11	3	0.272727	0.0267857	KEGG:04726	KEGG	Serotonergic synapse	8014	336	KEGG:00000	24	1.64101	0.0267857
query_1	TRUE	0.023461	113	11	3	0.272727	0.0265487	KEGG:04725	KEGG	Cholinergic synapse	8014	335	KEGG:00000	24	1.62965	0.0265487
query_1	TRUE	0.0240769	114	11	3	0.272727	0.0263158	KEGG:04724	KEGG	Glutamatergic synapse	8014	334	KEGG:00000	24	1.6184	0.0263158
query_1	TRUE	0.0273135	119	11	3	0.272727	0.0252101	KEGG:04935	KEGG	Growth hormone synthesis, secretion and action	8014	371	KEGG:00000	24	1.56362	0.0252101
query_1	TRUE	0.0386708	134	11	3	0.272727	0.0223881	KEGG:04270	KEGG	Vascular smooth muscle contraction	8014	278	KEGG:00000	24	1.41262	0.0223881
query_1	TRUE	0.00689441	400	17	6	0.352941	0.015	REAC:R-HSA-112316	REAC	Neuronal System	10760	1465	REAC:0000000	24	2.1615	0.015
query_1	TRUE	0.0117861	259	17	5	0.294118	0.019305	REAC:R-HSA-112315	REAC	Transmission across Chemical Synapses	10760	2381	REAC:R-HSA-112316	24	1.92863	0.019305
query_1	TRUE	0.0168401	48	17	3	0.176471	0.0625	REAC:R-HSA-418597	REAC	G alpha (z) signalling events	10760	912	REAC:R-HSA-388396	24	1.77366	0.0625
query_1	TRUE	0.00111901	30	12	3	0.25	0.1	WP:WP4941	WP	GPR143 in melanocytes and retinal pigment epithelium cells	7806	650	WP:000000	24	2.95117	0.1
query_1	TRUE	0.0349492	94	12	3	0.25	0.0319149	WP:WP35	WP	G protein signaling pathways	7806	653	WP:000000	24	1.45656	0.0319149
query_1	TRUE	0.0133135	9	7	2	0.285714	0.222222	CORUM:2300	CORUM	Profilin 2 complex	3627	975	CORUM:0000000	25	1.87571	0.222222
query_1	TRUE	0.000941861	436	25	7	0.28	0.016055	GO:0050804	GO:BP	modulation of chemical synaptic transmission	21029	15348	GO:0007268|GO:0099177	25	3.02601	0.016055
query_1	TRUE	0.000956468	437	25	7	0.28	0.0160183	GO:0099177	GO:BP	regulation of trans-synaptic signaling	21029	22321	GO:0010646|GO:0023051|GO:0099537	25	3.01933	0.0160183
query_1	TRUE	0.00170598	704	25	8	0.32	0.0113636	GO:0007268	GO:BP	chemical synaptic transmission	21029	3161	GO:0098916	25	2.76803	0.0113636
query_1	TRUE	0.00170598	704	25	8	0.32	0.0113636	GO:0098916	GO:BP	anterograde trans-synaptic signaling	21029	22182	GO:0099537	25	2.76803	0.0113636
query_1	TRUE	0.00185725	712	25	8	0.32	0.011236	GO:0099537	GO:BP	trans-synaptic signaling	21029	22352	GO:0099536	25	2.73113	0.011236
query_1	TRUE	0.00238197	736	25	8	0.32	0.0108696	GO:0099536	GO:BP	synaptic signaling	21029	22351	GO:0007267	25	2.62306	0.0108696
query_1	TRUE	0.0219854	263	25	5	0.2	0.0190114	GO:0007611	GO:BP	learning or memory	21029	3473	GO:0007610|GO:0050890	25	1.65787	0.0190114
query_1	TRUE	0.044835	305	25	5	0.2	0.0163934	GO:0050890	GO:BP	cognition	21029	15420	GO:0050877	25	1.34838	0.0163934
query_1	TRUE	3.60516e-12	332	24	11	0.458333	0.0331325	GO:0098978	GO:CC	glutamatergic synapse	21672	3694	GO:0045202	25	11.4431	0.0331325
query_1	TRUE	1.59377e-09	1305	24	14	0.583333	0.010728	GO:0045202	GO:CC	synapse	21672	2443	GO:0030054	25	8.79757	0.010728
query_1	TRUE	3.09307e-09	2076	24	16	0.666667	0.00770713	GO:0030054	GO:CC	cell junction	21672	1025	GO:0110165	25	8.50961	0.00770713
query_1	TRUE	4.89378e-07	352	24	8	0.333333	0.0227273	GO:0098984	GO:CC	neuron to neuron synapse	21672	3700	GO:0045202	25	6.31036	0.0227273
query_1	TRUE	6.67875e-07	55	24	5	0.208333	0.0909091	GO:0099146	GO:CC	intrinsic component of postsynaptic density membrane	21672	3758	GO:0098839|GO:0098948	25	6.1753	0.0909091
query_1	TRUE	7.93901e-07	1347	24	12	0.5	0.00890869	GO:0043005	GO:CC	neuron projection	21672	2090	GO:0120025	25	6.10023	0.00890869
query_1	TRUE	1.66928e-06	2205	24	14	0.583333	0.00634921	GO:0120025	GO:CC	plasma membrane bounded cell projection	21672	3858	GO:0042995	25	5.77747	0.00634921
query_1	TRUE	2.40937e-06	633	24	9	0.375	0.014218	GO:0030424	GO:CC	axon	21672	1098	GO:0043005	25	5.6181	0.014218
query_1	TRUE	3.08609e-06	2312	24	14	0.583333	0.00605536	GO:0042995	GO:CC	cell projection	21672	2089	GO:0110165	25	5.51059	0.00605536
query_1	TRUE	3.9853e-06	165	24	6	0.25	0.0363636	GO:0099240	GO:CC	intrinsic component of synaptic membrane	21672	3771	GO:0031226|GO:0097060	25	5.39954	0.0363636
query_1	TRUE	5.13591e-06	82	24	5	0.208333	0.0609756	GO:0098948	GO:CC	intrinsic component of postsynaptic specialization membrane	21672	3683	GO:0098936|GO:0099634	25	5.28938	0.0609756
query_1	TRUE	7.78468e-06	322	24	7	0.291667	0.0217391	GO:0014069	GO:CC	postsynaptic density	21672	823	GO:0032279|GO:0099572	25	5.10876	0.0217391
query_1	TRUE	8.22425e-06	90	24	5	0.208333	0.0555556	GO:0098839	GO:CC	postsynaptic density membrane	21672	3643	GO:0014069|GO:0099634	25	5.0849	0.0555556
query_1	TRUE	8.83253e-06	328	24	7	0.291667	0.0213415	GO:0032279	GO:CC	asymmetric synapse	21672	1507	GO:0098984	25	5.05391	0.0213415
query_1	TRUE	1.27217e-05	346	24	7	0.291667	0.0202312	GO:0099572	GO:CC	postsynaptic specialization	21672	3787	GO:0043226|GO:0098794	25	4.89546	0.0202312
query_1	TRUE	2.1221e-05	373	24	7	0.291667	0.0187668	GO:0097060	GO:CC	synaptic membrane	21672	3243	GO:0045202|GO:0098590	25	4.67323	0.0187668
query_1	TRUE	2.59626e-05	835	24	9	0.375	0.0107784	GO:0036477	GO:CC	somatodendritic compartment	21672	1960	GO:0110165	25	4.58565	0.0107784
query_1	TRUE	3.20765e-05	118	24	5	0.208333	0.0423729	GO:0099634	GO:CC	postsynaptic specialization membrane	21672	3793	GO:0045211|GO:0097060|GO:0099572	25	4.49381	0.0423729
query_1	TRUE	4.63026e-05	127	24	5	0.208333	0.0393701	GO:0098936	GO:CC	intrinsic component of postsynaptic membrane	21672	3677	GO:0045211|GO:0099240	25	4.33439	0.0393701
query_1	TRUE	5.20746e-05	51	24	4	0.166667	0.0784314	GO:0099061	GO:CC	integral component of postsynaptic density membrane	21672	3734	GO:0099060|GO:0099146	25	4.28337	0.0784314
query_1	TRUE	0.000116872	153	24	5	0.208333	0.0326797	GO:0099699	GO:CC	integral component of synaptic membrane	21672	3794	GO:0005887|GO:0099240	25	3.93229	0.0326797
query_1	TRUE	0.000139474	493	24	7	0.291667	0.0141988	GO:0098793	GO:CC	presynapse	21672	3621	GO:0045202|GO:0110165	25	3.85551	0.0141988
query_1	TRUE	0.000291369	78	24	4	0.166667	0.0512821	GO:0099060	GO:CC	integral component of postsynaptic specialization membrane	21672	3733	GO:0098948|GO:0099055	25	3.53556	0.0512821
query_1	TRUE	0.000306682	79	24	4	0.166667	0.0506329	GO:0098685	GO:CC	Schaffer collateral - CA1 synapse	21672	3606	GO:0045202	25	3.51331	0.0506329
query_1	TRUE	0.000594372	613	24	7	0.291667	0.0114192	GO:0098794	GO:CC	postsynapse	21672	3622	GO:0045202|GO:0110165	25	3.22594	0.0114192
query_1	TRUE	0.00142353	35	24	3	0.125	0.0857143	GO:0098686	GO:CC	hippocampal mossy fiber to CA3 synapse	21672	3607	GO:0098984	25	2.84663	0.0857143
query_1	TRUE	0.00168103	121	24	4	0.166667	0.0330579	GO:0099055	GO:CC	integral component of postsynaptic membrane	21672	3728	GO:0098936|GO:0099699	25	2.77443	0.0330579
query_1	TRUE	0.00199294	273	24	5	0.208333	0.018315	GO:0045211	GO:CC	postsynaptic membrane	21672	2445	GO:0097060|GO:0098794	25	2.70051	0.018315
query_1	TRUE	0.00334195	144	24	4	0.166667	0.0277778	GO:0042734	GO:CC	presynaptic membrane	21672	2078	GO:0097060|GO:0098793	25	2.476	0.0277778
query_1	TRUE	0.00543676	163	24	4	0.166667	0.0245399	GO:0030426	GO:CC	growth cone	21672	1100	GO:0030427|GO:0150034	25	2.26466	0.0245399
query_1	TRUE	0.00626304	169	24	4	0.166667	0.0236686	GO:0030427	GO:CC	site of polarized growth	21672	1101	GO:0110165	25	2.20321	0.0236686
query_1	TRUE	0.00804821	612	24	6	0.25	0.00980392	GO:0030425	GO:CC	dendrite	21672	1099	GO:0043005|GO:0097447	25	2.0943	0.00980392
query_1	TRUE	0.00819611	614	24	6	0.25	0.00977199	GO:0097447	GO:CC	dendritic tree	21672	3353	GO:0036477|GO:0043005	25	2.08639	0.00977199
query_1	TRUE	0.0160374	78	24	3	0.125	0.0384615	GO:0098889	GO:CC	intrinsic component of presynaptic membrane	21672	3664	GO:0042734|GO:0099240	25	1.79487	0.0384615
query_1	TRUE	0.0228226	15	24	2	0.0833333	0.133333	GO:0033268	GO:CC	node of Ranvier	21672	1639	GO:0044304|GO:0110165	25	1.64164	0.133333
query_1	TRUE	0.0274829	9818	24	20	0.833333	0.00203707	GO:0016020	GO:CC	membrane	21672	849	GO:0110165	25	1.56094	0.00203707
query_1	TRUE	0.0295207	17	24	2	0.0833333	0.117647	GO:0001518	GO:CC	voltage-gated sodium channel complex	21672	157	GO:0005887|GO:0034706|GO:0098797	25	1.52987	0.117647
query_1	TRUE	0.0315599	488	24	5	0.208333	0.0102459	GO:0043025	GO:CC	neuronal cell body	21672	2092	GO:0036477|GO:0044297	25	1.50086	0.0102459
query_1	TRUE	0.0378588	5694	24	15	0.625	0.00263435	GO:0005886	GO:CC	plasma membrane	21672	514	GO:0016020|GO:0071944	25	1.42183	0.00263435
query_1	TRUE	0.0400328	273	24	4	0.166667	0.014652	GO:0150034	GO:CC	distal axon	21672	3996	GO:0030424|GO:0110165	25	1.39758	0.014652
query_1	TRUE	0.0465584	2288	24	10	0.416667	0.00437063	GO:0097367	GO:MF	carbohydrate derivative binding	20166	10312	GO:0005488	25	1.332	0.00437063
query_1	TRUE	0.0470611	27	12	3	0.25	0.111111	HP:0007270	HP	Atypical absence seizure	4667	4681	HP:0002121	25	1.32734	0.111111
query_1	TRUE	0.00334362	549	17	7	0.411765	0.0127505	REAC:R-HSA-422475	REAC	Axon guidance	10760	185	REAC:R-HSA-9675108	25	2.47578	0.0127505
query_1	TRUE	0.00447852	574	17	7	0.411765	0.0121951	REAC:R-HSA-9675108	REAC	Nervous system development	10760	1459	REAC:R-HSA-1266738	25	2.34887	0.0121951
query_1	TRUE	0.0260978	9	17	2	0.117647	0.222222	REAC:R-HSA-428542	REAC	Regulation of commissural axon pathfinding by SLIT and ROBO	10760	1865	REAC:R-HSA-376176	25	1.5834	0.222222
query_1	TRUE	0.0418196	1116	17	8	0.470588	0.00716846	REAC:R-HSA-1266738	REAC	Developmental Biology	10760	690	REAC:0000000	25	1.37862	0.00716846
query_1	TRUE	0.0477128	12	17	2	0.117647	0.166667	REAC:R-HSA-442720	REAC	CREB1 phosphorylation through the activation of Adenylate Cyclase	10760	270	REAC:R-HSA-438064	25	1.32137	0.166667
query_1	TRUE	0.0333097	4666	25	16	0.64	0.00342906	TF:M00444_1	TF	Factor: VDR; motif: GGGKNARNRRGGWSA; match class: 1	19959	8927	TF:M00444	25	1.47743	0.00342906
query_1	TRUE	0.00955525	6181	23	16	0.695652	0.00258858	GO:0071944	GO:CC	cell periphery	21672	3128	GO:0110165	26	2.01976	0.00258858
query_1	TRUE	0.0247156	488	23	5	0.217391	0.0102459	GO:0043025	GO:CC	neuronal cell body	21672	2092	GO:0036477|GO:0044297	26	1.60703	0.0102459
query_1	TRUE	0.0334614	835	23	6	0.26087	0.00718563	GO:0036477	GO:CC	somatodendritic compartment	21672	1960	GO:0110165	26	1.47546	0.00718563
query_1	TRUE	0.0404876	21	23	2	0.0869565	0.0952381	GO:0042827	GO:CC	platelet dense granule	21672	2088	GO:0030141	26	1.39268	0.0952381
query_1	TRUE	0.0446113	554	23	5	0.217391	0.00902527	GO:0044297	GO:CC	cell body	21672	2302	GO:0110165	26	1.35056	0.00902527
query_1	TRUE	0.0232344	72	23	3	0.130435	0.0416667	GO:0015370	GO:MF	solute:sodium symporter activity	20166	3148	GO:0015081|GO:0015294	26	1.63387	0.0416667
query_1	TRUE	0.0467956	16	23	2	0.0869565	0.125	GO:0005283	GO:MF	amino acid:sodium symporter activity	20166	1749	GO:0005343|GO:0005416	26	1.32979	0.125
query_1	TRUE	0.000272779	231	19	6	0.315789	0.025974	HPA:0090972	HPA	cerebellum; granular cells - cytoplasm/membrane[â‰¥Medium]	10976	141	HPA:0090971	26	3.56419	0.025974
query_1	TRUE	0.00116806	297	19	6	0.315789	0.020202	HPA:0090971	HPA	cerebellum; granular cells - cytoplasm/membrane[â‰¥Low]	10976	140	HPA:0090000	26	2.93253	0.020202
query_1	TRUE	0.00720332	120	19	4	0.210526	0.0333333	HPA:0091073	HPA	cerebellum; white matter cells - cytoplasm/membrane[High]	10976	178	HPA:0091072	26	2.14247	0.0333333
query_1	TRUE	0.00985176	130	19	4	0.210526	0.0307692	HPA:0090973	HPA	cerebellum; granular cells - cytoplasm/membrane[High]	10976	142	HPA:0090972	26	2.00649	0.0307692
query_1	TRUE	0.00985176	130	19	4	0.210526	0.0307692	HPA:0090982	HPA	cerebellum; granular cells - nucleus[â‰¥Medium]	10976	144	HPA:0090981	26	2.00649	0.0307692
query_1	TRUE	0.0154794	146	19	4	0.210526	0.0273973	HPA:0090981	HPA	cerebellum; granular cells - nucleus[â‰¥Low]	10976	143	HPA:0090000	26	1.81025	0.0273973
query_1	TRUE	0.0320328	187	19	4	0.210526	0.0213904	GO:0099504	GO:BP	synaptic vesicle cycle	21029	22336	GO:0051649|GO:0099003	27	1.4944	0.0213904
query_1	TRUE	0.0390003	704	19	6	0.315789	0.00852273	GO:0007268	GO:BP	chemical synaptic transmission	21029	3161	GO:0098916	27	1.40893	0.00852273
query_1	TRUE	0.0390003	704	19	6	0.315789	0.00852273	GO:0098916	GO:BP	anterograde trans-synaptic signaling	21029	22182	GO:0099537	27	1.40893	0.00852273
query_1	TRUE	0.0415657	712	19	6	0.315789	0.00842697	GO:0099537	GO:BP	trans-synaptic signaling	21029	22352	GO:0099536	27	1.38126	0.00842697
query_1	TRUE	0.0450503	204	19	4	0.210526	0.0196078	GO:0099003	GO:BP	vesicle-mediated transport in synapse	21029	22232	GO:0016192	27	1.3463	0.0196078
query_1	TRUE	0.000173016	207	20	5	0.25	0.0241546	GO:0030658	GO:CC	transport vesicle membrane	21672	1116	GO:0030133|GO:0030659|GO:0098588	27	3.76191	0.0241546
query_1	TRUE	0.000439922	108	20	4	0.2	0.037037	GO:0030672	GO:CC	synaptic vesicle membrane	21672	1129	GO:0008021|GO:0099501	27	3.35662	0.037037
query_1	TRUE	0.000439922	108	20	4	0.2	0.037037	GO:0099501	GO:CC	exocytic vesicle membrane	21672	3775	GO:0030658|GO:0070382	27	3.35662	0.037037
query_1	TRUE	0.0047463	409	20	5	0.25	0.0122249	GO:0030133	GO:CC	transport vesicle	21672	1072	GO:0012505|GO:0031410	27	2.32364	0.0122249
query_1	TRUE	0.00502841	200	20	4	0.2	0.02	GO:0008021	GO:CC	synaptic vesicle	21672	596	GO:0070382|GO:0098793	27	2.29857	0.02
query_1	TRUE	0.00729545	220	20	4	0.2	0.0181818	GO:0070382	GO:CC	exocytic vesicle	21672	2793	GO:0030133|GO:0099503	27	2.13695	0.0181818
query_1	TRUE	0.0115486	493	20	5	0.25	0.010142	GO:0098793	GO:CC	presynapse	21672	3621	GO:0045202|GO:0110165	27	1.93747	0.010142
query_1	TRUE	0.0313818	181	8	3	0.375	0.0165746	KEGG:04360	KEGG	Axon guidance	8014	285	KEGG:00000	27	1.50332	0.0165746
query_1	TRUE	0.0448591	12193	19	18	0.947368	0.00147626	GO:0005737	GO:CC	cytoplasm	21672	384	GO:0005622|GO:0110165	28	1.34815	0.00147626
query_1	TRUE	0.000872313	2783	19	12	0.631579	0.00431189	GO:0007166	GO:BP	cell surface receptor signaling pathway	21029	3068	GO:0007165	29	3.05933	0.00431189
query_1	TRUE	0.0277658	6411	19	15	0.789474	0.00233973	GO:0023052	GO:BP	signaling	21029	7654	GO:0008150	29	1.55649	0.00233973
query_1	TRUE	0.0310731	6465	19	15	0.789474	0.00232019	GO:0007154	GO:BP	cell communication	21029	3056	GO:0009987	29	1.50762	0.00232019
query_1	TRUE	0.000554025	1630	19	9	0.473684	0.00552147	GO:0005887	GO:CC	integral component of plasma membrane	21672	515	GO:0016021|GO:0031226	29	3.25647	0.00552147
query_1	TRUE	0.000835902	1713	19	9	0.473684	0.00525394	GO:0031226	GO:CC	intrinsic component of plasma membrane	21672	1237	GO:0005886|GO:0031224	29	3.07784	0.00525394
query_1	TRUE	0.0275677	633	19	5	0.263158	0.00789889	GO:0030424	GO:CC	axon	21672	1098	GO:0043005	29	1.5596	0.00789889
query_1	TRUE	0.0319729	2076	19	8	0.421053	0.00385356	GO:0030054	GO:CC	cell junction	21672	1025	GO:0110165	29	1.49522	0.00385356
query_1	TRUE	0.0331588	68	18	3	0.166667	0.0441176	MIRNA:hsa-miR-432-3p	MIRNA	hsa-miR-432-3p	14830	1001	MIRNA:000000	29	1.4794	0.0441176

## Sheet: module_scores_by_cluster_grade
	Oligodendrocyte	OPC	Con	HD1	HD2	HD3	HD4	HDJ	Cluster.1	Cluster.2	Cluster.3	Cluster.4	Cluster.5	Cluster.6	Cluster.7
Module_1	0.332169	-1.92427	0.0092246	0.00893506	-0.534952	-0.376239	0.151744	0.286008	0.213635	0.859468	0.269977	-1.88497	-2.10415	-1.39771	-0.649099
Module_2	-0.0728436	-0.02858	-0.0853548	-0.063019	-0.0913351	-0.103849	0.10996	-0.0616842	-0.108728	-0.109168	-0.138834	-0.0291511	-0.123478	0.012278	2.9971
Module_3	0.272207	-1.53973	-0.0853501	0.311674	-0.0762138	-0.725118	-0.0814712	0.136196	0.42962	0.388904	0.0323656	-1.44932	-1.83802	-2.86279	-1.09956
Module_4	0.341002	-1.97546	-0.213566	0.17827	-0.110758	-0.11391	0.479182	0.0452083	0.512132	0.162611	0.261947	-1.93602	-2.13871	-1.47178	-0.638539
Module_5	-0.393837	2.24763	0.202977	-0.0189965	0.072381	-0.26379	-0.118022	-0.0659664	-0.390729	-0.364864	-0.457274	2.32884	2.0082	-0.315636	-0.105809
Module_6	-0.390284	2.22547	0.123779	0.00219351	0.160777	-0.212568	0.00495993	-0.0999237	-0.377414	-0.395592	-0.465244	2.301	2.12612	-0.314037	-0.0206881
Module_7	-0.356231	2.05366	0.22461	-0.00593156	0.036504	-0.623645	-0.231593	0.0403209	-0.37624	-0.0523124	-0.601645	2.13868	1.89102	-1.13197	-0.160623
Module_8	0.234527	-1.40286	0.137949	0.0304033	-0.391003	0.383078	-0.0474987	-0.0195674	0.153464	0.194113	0.395087	-1.40893	-1.58914	2.20356	-0.48495
Module_9	-0.322994	1.86628	-0.0024078	0.319392	0.258524	-0.539872	-0.170177	-0.101199	-0.105885	-0.439581	-0.779698	1.85359	2.12806	-0.70018	-0.430241
Module_10	0.116816	-0.681067	-0.804537	0.661157	0.758378	-0.156202	1.23249	-0.314674	0.718433	-0.755426	-0.529694	-0.549076	-1.31826	-0.604938	-0.29397
Module_11	-0.397218	2.28237	0.110776	0.0191298	0.166229	-0.235818	-0.0973174	-0.0771227	-0.372592	-0.386554	-0.477917	2.31113	2.34266	-0.499248	-0.293224
Module_12	0.347996	-2.01522	-0.289575	0.264776	0.00795276	-0.346008	0.0598242	0.106517	0.544798	0.278888	0.114757	-1.93032	-2.37241	-2.03547	-0.603347
Module_13	-0.100854	0.628966	-0.19075	0.570727	0.20999	-1.07738	-0.103987	0.045363	0.303507	-0.164227	-0.916673	0.678073	0.760412	-2.88645	-1.06225
Module_14	-0.384658	2.15272	0.0990254	0.0259909	0.164536	-0.16789	-0.0366715	-0.119936	-0.372338	-0.391289	-0.43091	2.209	1.95917	-0.14401	-0.205094
Module_15	-0.288849	1.66967	-0.0164258	0.379884	0.17367	-0.843307	-0.0650438	-0.0269696	-0.0651553	-0.216812	-0.906384	1.69038	1.80215	-1.51776	-0.458594
Module_16	-0.347158	2.00506	0.076619	0.164585	0.172398	-0.384254	-0.110665	-0.0834503	-0.242026	-0.393648	-0.596119	2.06296	1.94323	-0.544346	-0.202358
Module_17	-0.12708	0.735619	-0.419498	0.57152	0.447733	-0.896582	0.352605	-0.0565564	0.341931	-0.414816	-1.02843	0.898928	0.185889	-1.75097	-0.12835
Module_18	-0.393293	2.2321	0.186874	0.0017843	0.121123	-0.22779	-0.0556666	-0.108801	-0.390692	-0.382878	-0.419527	2.27446	2.16567	-0.348344	-0.227258
Module_19	0.167972	-0.926106	-0.395889	0.549251	0.164583	-0.711578	0.194918	0.058226	0.523257	0.0619017	-0.407787	-0.859486	-1.02888	-2.77984	-1.22752
Module_20	-0.375357	2.15602	0.137839	0.0475025	0.106623	-0.284464	-0.0697262	-0.0704722	-0.386208	-0.372526	-0.489766	2.21382	2.03706	-0.475935	1.82129
Module_21	-0.361965	1.96794	0.211016	-0.059157	0.0525049	-0.092032	-0.114552	-0.123044	-0.391119	-0.324947	-0.362958	1.92033	2.07732	0.481743	-0.245138
Module_22	-0.398732	2.29114	0.154275	-0.0180726	0.125263	-0.189871	-0.118433	-0.0742809	-0.395788	-0.369747	-0.467698	2.27943	2.5725	-0.334706	-0.146002
Module_23	-0.0667605	0.240088	-0.115488	0.266104	0.0445019	-0.513565	-0.159294	0.0072878	0.146783	-0.109987	-0.638885	0.372088	-0.456862	0.265668	-0.318874
Module_24	-0.158923	0.90527	-0.082855	0.385863	0.196065	-0.730035	-0.0555782	-0.0364998	0.105006	-0.300707	-0.829808	1.04509	0.25399	-0.418856	1.25655
Module_25	-0.33779	1.88703	0.188903	-0.0160963	0.0136942	-0.286777	-0.207263	-0.0323118	-0.347361	-0.224636	-0.504858	2.0584	1.11069	0.344493	-0.116701
Module_26	0.329414	-1.90837	-0.281354	0.0923225	0.0160379	0.352398	0.0400798	0.0137552	0.511068	-0.00889763	0.279777	-1.87926	-2.10921	0.0216065	-0.689379
Module_27	-0.362664	2.00794	0.19353	-0.055302	0.0173423	-0.286476	-0.184696	-0.0317534	-0.369339	-0.281583	-0.441632	2.10654	1.69097	-0.399809	-0.213164
Module_28	-0.315348	1.70054	0.090853	-0.0185181	0.124952	-0.309474	-0.0347697	-0.0674866	-0.319606	-0.368908	-0.457567	1.80465	1.30477	-0.398291	2.91949
Module_29	-0.354061	1.92041	0.181211	-0.0589591	0.0519073	-0.195882	-0.0839567	-0.0879156	-0.349326	-0.370583	-0.419381	2.00045	1.83628	-0.271618	0.250378
