# Supplementary material for: Huntington disease oligodendrocyte maturation deficits revealed by single-nucleus RNAseq are rescued by thiamine-biotin supplementation
Source: Nat Commun. 2022 Dec 21;13:7791. doi: 10.1038/s41467-022-35388-x (PMC9772349; doi:10.1038/s41467-022-35388-x)
Supplement: Supplementary file 12 — Supplementary Dataset 10 [file 41467_2022_35388_MOESM12_ESM.xlsx]

## Sheet: cluster annotation
Cluster	Cell type
0	D1+MSN1
1	ODC1
2	D2+
3	ODC2
4	Inhib1
5	Astro
6	Inhib2
7	OPC
8	MG
9	Ex1
10	Ex2
11	Inhib3
12	Vascular
13	Cholin

## Sheet: thiamine_cluster0R61vvsNTv
Column1	p_val	avg_log2FC	pct.1	pct.2	p_val_adj
Rgs9	0	-1.22416	0.917	0.993	0
Meg3	0	0.645516	1	1	0
Phactr1	0	-0.644229	0.999	1	0
Adcy5	0	-0.950282	0.868	0.988	0
Pcp4	0	-1.45615	0.778	0.979	0
Pde10a	0	-1.24028	0.997	1	0
Malat1	0	-0.852856	1	1	0
Mgat4c	3.30168e-295	1.09849	0.982	0.834	8.39651e-291
Gm10754	2.83919e-294	-1.06947	0.866	0.98	7.22035e-290
Grip1	8.39015e-276	0.983451	0.954	0.71	2.1337e-271
Robo1	4.81257e-275	0.733477	0.998	0.995	1.22389e-270
Celf2	5.46279e-268	-0.393417	1	1	1.38924e-263
Atp2b1	5.67944e-267	-0.643948	0.998	1	1.44434e-262
Ppp1r1b	1.83491e-262	-0.862043	0.543	0.891	4.66635e-258
Lsamp	1.00671e-256	0.753437	0.999	0.994	2.56017e-252
Scn4b	2.28957e-256	-0.852348	0.239	0.707	5.8226e-252
Ogt	2.09462e-239	0.713269	0.979	0.858	5.32683e-235
Cmss1	3.23858e-238	-0.839188	0.982	0.999	8.23604e-234
Mhrt	9.76584e-233	-0.984981	0.26	0.688	2.48355e-228
Sfmbt2	7.30351e-230	0.669946	0.421	0.009	1.85736e-225
Ddx5	1.19133e-224	0.605472	0.999	0.995	3.02967e-220
Lpp	3.46554e-224	0.778934	0.617	0.158	8.81323e-220
Frmd4a	8.10143e-223	0.794234	0.967	0.883	2.06027e-218
Magi2	2.20392e-217	0.521776	1	1	5.60479e-213
Ppp3ca	1.52045e-216	-0.473545	1	1	3.86665e-212
Dclk1	1.73848e-212	-0.6759	0.945	0.996	4.42114e-208
Camk4	2.1215e-207	-0.701302	0.957	0.996	5.39518e-203
Inf2	6.2347e-205	-0.778692	0.593	0.887	1.58555e-200
Ppfia2	1.0493e-196	0.671395	0.969	0.858	2.66848e-192
Nrxn1	6.01953e-193	0.477917	1	1	1.53083e-188
Cdh18	3.77212e-190	0.86485	0.974	0.785	9.59289e-186
Ckb	3.16069e-188	-0.753664	0.87	0.979	8.03795e-184
Ror1	8.16256e-186	-0.859382	0.187	0.583	2.07582e-181
Lrfn5	4.84217e-183	0.520228	1	0.997	1.23141e-178
Gm28905	9.53567e-181	-0.816473	0.662	0.92	2.42502e-176
Rian	8.09361e-180	0.538169	0.997	0.983	2.05829e-175
Osbpl8	2.11371e-179	-0.689226	0.923	0.981	5.37537e-175
Nrgn	3.55146e-179	-0.946058	0.742	0.927	9.03172e-175
Npas2	6.43158e-179	-0.694303	0.689	0.927	1.63562e-174
Homer1	1.4847e-178	-0.865419	0.783	0.939	3.77574e-174
Fam155a	2.8218e-177	1.0448	0.83	0.508	7.17612e-173
Kcnq1ot1	1.26662e-173	0.654906	0.97	0.864	3.22115e-169
Pde1b	2.08202e-166	-0.623925	0.723	0.926	5.29479e-162
Rap1gap	5.39418e-159	-0.665829	0.657	0.892	1.37179e-154
Spock3	8.14753e-159	-0.546383	0.997	0.998	2.072e-154
Calm2	1.24247e-158	-0.606943	0.971	0.996	3.15974e-154
Camkv	1.87657e-158	-0.603148	0.764	0.943	4.77231e-154
C130073E24Rik	8.50424e-157	0.906838	0.612	0.208	2.16271e-152
Hpca	2.36556e-156	-0.675358	0.466	0.788	6.01585e-152
Pde7b	2.8457e-156	-0.564321	0.99	0.997	7.23691e-152
Ppp1r1a	5.42952e-156	-0.674901	0.397	0.727	1.38078e-151
Dmd	8.03696e-155	0.596585	0.981	0.901	2.04388e-150
Cacna2d3	1.26042e-154	-0.376745	1	1	3.20538e-150
Epyc	2.28074e-154	-0.489789	0.073	0.398	5.80016e-150
Arpp19	3.81244e-154	-0.671325	0.512	0.808	9.69541e-150
Strn	8.62006e-154	-0.649735	0.845	0.959	2.19217e-149
Arpp21	3.7061e-152	-0.416783	0.999	1	9.42497e-148
Baiap2	7.24903e-151	-0.565857	0.868	0.974	1.8435e-146
Rhobtb2	8.31953e-151	-0.667391	0.444	0.758	2.11574e-146
Ryr1	1.00949e-149	-0.612872	0.215	0.569	2.56723e-145
Gabrd	3.40766e-149	-0.634574	0.432	0.745	8.66601e-145
Cdr1os	1.2371e-147	0.503562	0.997	0.984	3.14606e-143
Dok6	1.29139e-146	0.58291	0.964	0.858	3.28413e-142
Itpr1	8.78348e-146	-0.541275	0.956	0.992	2.23373e-141
Nrxn3	2.93146e-144	0.289413	1	1	7.45499e-140
Scaper	8.88214e-142	0.582326	0.901	0.708	2.25882e-137
Ctnna2	6.40405e-140	0.41967	1	0.999	1.62861e-135
Neto2	3.99475e-139	-0.658828	0.58	0.844	1.01591e-134
Gsg1l	6.60499e-139	-0.65122	0.402	0.714	1.67972e-134
Tmem178b	1.05015e-138	0.539696	0.977	0.918	2.67063e-134
Ralyl	1.22517e-138	0.708261	0.924	0.672	3.11574e-134
Gpm6b	3.34722e-136	-0.562375	0.933	0.981	8.51231e-132
Camk2b	4.02503e-136	-0.54807	0.777	0.938	1.0236e-131
Cntnap3	5.16536e-136	-0.72842	0.303	0.635	1.3136e-131
Lrrk2	7.50194e-135	-0.626681	0.611	0.845	1.90782e-130
Agbl4	2.39019e-132	0.614341	0.928	0.772	6.07849e-128
Prkcb	3.18289e-131	-0.53449	0.969	0.985	8.0944e-127
A230006K03Rik	8.00741e-131	0.602397	0.951	0.87	2.03637e-126
Atad2b	5.39808e-130	0.573422	0.73	0.424	1.37279e-125
Traip	4.14981e-129	-0.580626	0.263	0.588	1.05534e-124
Gria1	4.80032e-129	0.393761	1	0.999	1.22077e-124
5330417C22Rik	1.11788e-128	-0.582746	0.643	0.869	2.84289e-124
Ube3a	1.69219e-128	0.432225	0.998	0.994	4.30341e-124
Pmepa1	1.89807e-128	-0.60671	0.315	0.636	4.82698e-124
Sema6d	4.27271e-128	0.652913	0.898	0.726	1.08659e-123
Guf1	1.20354e-127	0.534213	0.649	0.319	3.06071e-123
Gm20754	5.91911e-127	0.742576	0.853	0.653	1.50529e-122
Gm15810	3.09256e-126	-0.583884	0.651	0.878	7.8647e-122
Arhgap10	4.98971e-125	-0.537493	0.853	0.962	1.26893e-120
Scn9a	9.26986e-125	0.574843	0.62	0.286	2.35742e-120
Ccser1	1.04006e-124	0.450352	0.997	0.989	2.64497e-120
Rbm39	1.46397e-124	0.410115	1	0.989	3.72302e-120
Ptpn5	6.4164e-124	-0.555703	0.791	0.925	1.63175e-119
Nrg3	5.6577e-122	0.505335	0.996	0.977	1.43881e-117
Drd1	2.91365e-121	-0.562456	0.655	0.84	7.40969e-117
Tesc	7.98568e-121	-0.57078	0.446	0.723	2.03084e-116
Dbp	8.29622e-119	-0.499671	0.237	0.555	2.10981e-114
Mdk	4.30862e-117	-0.490781	0.17	0.475	1.09572e-112
Ppp4r4	7.17768e-117	-0.546826	0.497	0.771	1.82535e-112
Rasgrp2	1.41446e-116	-0.549637	0.381	0.675	3.59711e-112
Ank2	4.92139e-116	0.391682	1	0.996	1.25156e-111
Snhg14	1.41856e-115	0.391139	0.996	0.995	3.60754e-111
Klf12	1.29667e-114	0.581104	0.835	0.607	3.29756e-110
Ctxn1	6.60855e-114	-0.519587	0.342	0.647	1.68062e-109
Chn1	7.49176e-114	-0.48578	0.918	0.975	1.90523e-109
Kcnh4	8.55792e-114	-0.47967	0.213	0.519	2.17636e-109
Nav3	1.37965e-112	0.500942	0.982	0.929	3.50858e-108
Rgs11	1.49843e-112	-0.473613	0.191	0.492	3.81066e-108
Slc6a6	1.66941e-111	-0.511252	0.758	0.92	4.24546e-107
Camk2n1	3.65999e-111	-0.557907	0.51	0.761	9.30772e-107
Anks1b	7.72352e-111	-0.36628	1	1	1.96417e-106
Sec14l1	2.25893e-110	-0.544034	0.534	0.765	5.74468e-106
A330102I10Rik	4.4886e-110	0.560304	0.753	0.483	1.1415e-105
Pcdh9	3.99297e-109	0.523932	0.994	0.948	1.01545e-104
Bicd1	9.62737e-109	0.483106	0.899	0.759	2.44834e-104
Cnr1	7.00453e-108	-0.993955	0.43	0.662	1.78132e-103
Mapk4	1.30658e-106	-0.615066	0.711	0.873	3.32277e-102
Lhfpl3	1.45148e-106	0.56172	0.935	0.845	3.69126e-102
Olfm3	2.96681e-106	0.649518	0.594	0.291	7.5449e-102
Rsrp1	4.28482e-106	0.42041	0.979	0.924	1.08967e-101
Lmo2	6.27638e-106	-0.474474	0.221	0.517	1.59615e-101
Itpka	6.56441e-106	-0.505341	0.404	0.68	1.6694e-101
Cacna2d1	2.75426e-104	0.427446	0.99	0.959	7.00437e-100
Sgcz	3.36872e-104	0.500224	0.991	0.95	8.567e-100
4930402H24Rik	2.06068e-103	0.451013	0.946	0.849	5.24052e-99
Apc	4.34503e-103	0.461087	0.93	0.796	1.10499e-98
Enah	2.13758e-102	0.52022	0.77	0.531	5.43607e-98
Cttnbp2	6.68574e-102	-0.414316	0.992	0.998	1.70025e-97
Fgf12	9.44628e-102	0.376558	0.998	0.996	2.40228e-97
Gli3	1.33554e-100	-0.560324	0.164	0.446	3.39641e-96
Ebf1	6.17403e-100	0.607708	0.922	0.83	1.57012e-95
Zfyve28	1.03776e-99	-0.473668	0.64	0.847	2.63912e-95
Clasp2	3.37582e-99	0.471298	0.881	0.72	8.58506e-95
1700003D09Rik	3.92657e-99	-0.518475	0.372	0.644	9.98566e-95
Gpc6	7.01188e-99	0.67397	0.802	0.529	1.78319e-94
Stmn2	8.69797e-99	0.516249	0.681	0.394	2.21198e-94
Cep164	2.82436e-98	0.471724	0.655	0.373	7.18262e-94
4930525C09Rik	4.07429e-98	-0.399228	0.143	0.415	1.03613e-93
Ccnl2	1.48731e-97	0.473182	0.824	0.622	3.78237e-93
Grid2	1.65965e-97	0.3204	1	0.999	4.22067e-93
Zswim6	1.71785e-97	-0.496727	0.908	0.963	4.36867e-93
Pde2a	2.30744e-97	-0.478196	0.822	0.937	5.86806e-93
Zbtb20	3.2394e-97	0.573389	0.975	0.849	8.23813e-93
Hrh3	4.1165e-97	-0.348658	0.057	0.284	1.04687e-92
Exoc4	4.29405e-97	0.412635	0.972	0.928	1.09202e-92
Actn2	8.41142e-97	-0.523174	0.718	0.876	2.13911e-92
Rims2	4.24179e-96	0.324867	0.999	1	1.07873e-91
Slc4a4	6.84173e-96	-0.442178	0.951	0.975	1.73992e-91
1700016P03Rik	1.97088e-95	-0.799481	0.081	0.315	5.01216e-91
Cyld	2.24524e-95	-0.470121	0.827	0.944	5.70987e-91
Snhg11	2.77175e-95	0.351415	0.998	0.999	7.04884e-91
Fbxl16	6.25474e-95	-0.494493	0.497	0.725	1.59064e-90
Penk	3.05709e-94	-0.578408	0.11	0.361	7.77447e-90
2010300C02Rik	1.25376e-93	-0.431867	0.79	0.934	3.18844e-89
Cx3cl1	5.21037e-93	-0.458211	0.621	0.83	1.32505e-88
Sh2d5	5.54322e-93	-0.487111	0.371	0.634	1.4097e-88
Gmds	9.92111e-93	0.520809	0.779	0.572	2.52304e-88
Ccdc88c	4.74415e-92	-0.462417	0.726	0.875	1.20649e-87
Ppp1r16b	9.02693e-92	-0.497026	0.431	0.683	2.29564e-87
Car12	1.1041e-91	-0.562233	0.263	0.526	2.80782e-87
Gm19410	2.09697e-91	-0.433796	0.083	0.315	5.3328e-87
Rasgef1a	8.08773e-91	-0.437011	0.733	0.891	2.05679e-86
Gm32647	1.24861e-90	0.880488	0.632	0.361	3.17534e-86
Gm49906	1.81998e-90	-0.592519	0.401	0.68	4.6284e-86
Mtcl1	5.17176e-90	-0.506365	0.668	0.848	1.31523e-85
A330015K06Rik	1.21054e-89	-0.518863	0.917	0.971	3.07851e-85
Cdc42bpa	3.10457e-89	0.391313	0.957	0.904	7.89523e-85
Taf15	4.07764e-89	0.449834	0.788	0.589	1.03699e-84
Zranb2	3.5523e-88	0.365728	0.985	0.951	9.03386e-84
Rbm28	7.51433e-88	0.449798	0.86	0.715	1.91097e-83
Xkr4	1.07957e-87	0.411553	0.986	0.964	2.74546e-83
Pcsk2	2.02642e-87	-0.393344	0.976	0.995	5.15339e-83
4933424G05Rik	3.39749e-87	-0.496339	0.504	0.728	8.64014e-83
Grik2	4.16292e-87	-0.330682	1	1	1.05867e-82
Luc7l3	2.0235e-86	0.425576	0.919	0.808	5.14596e-82
AI480526	5.75754e-86	0.412303	0.465	0.197	1.4642e-81
Gm50024	9.15443e-86	-0.425184	0.219	0.481	2.32806e-81
Atf6	1.24495e-85	-0.497313	0.579	0.786	3.16603e-81
Pdzd2	1.74209e-85	-0.586988	0.808	0.908	4.43032e-81
Tpm1	5.92884e-85	-0.508763	0.626	0.82	1.50776e-80
4930555F03Rik	3.15719e-84	0.543719	0.451	0.17	8.02906e-80
Gm17231	1.04974e-83	-0.477339	0.338	0.596	2.6696e-79
Ablim1	1.87453e-83	0.477851	0.615	0.353	4.76713e-79
St7	2.33535e-83	0.449899	0.753	0.532	5.93903e-79
Luc7l2	5.5133e-83	0.338436	0.998	0.996	1.40209e-78
P4ha1	1.21837e-82	-0.533676	0.472	0.701	3.09844e-78
Ndrg4	1.34741e-82	-0.402207	0.928	0.981	3.42661e-78
Tenm3	5.43119e-82	0.569484	0.926	0.803	1.3812e-77
Tbc1d8	1.50944e-81	-0.477903	0.581	0.779	3.83866e-77
Exoc6b	4.1455e-81	0.431006	0.887	0.765	1.05424e-76
Kcnip3	5.93757e-81	-0.486677	0.543	0.765	1.50998e-76
Nkain2	8.26766e-81	0.307608	1	1	2.10255e-76
Chd9	9.04326e-81	0.39222	0.934	0.838	2.29979e-76
Pnn	9.71534e-81	0.426885	0.87	0.723	2.47071e-76
Wipf3	2.90576e-80	-0.52143	0.503	0.706	7.38964e-76
Igsf21	6.00263e-80	-0.286488	0.055	0.253	1.52653e-75
Itga9	6.57908e-80	-0.461155	0.151	0.387	1.67313e-75
Camkk2	9.63617e-80	-0.434264	0.57	0.775	2.45057e-75
Gpr83	1.6067e-79	-0.389184	0.131	0.362	4.086e-75
Erc2	1.60744e-79	-0.290866	1	1	4.08789e-75
Npas3	1.75471e-79	0.472169	0.347	0.114	4.46242e-75
Fbxl17	2.19001e-79	0.391527	0.96	0.895	5.56942e-75
Kcnip2	2.3971e-79	-0.43694	0.588	0.787	6.09606e-75
Dpy19l3	2.78914e-79	-0.427035	0.268	0.525	7.09305e-75
Pid1	3.19942e-79	0.477391	0.534	0.271	8.13645e-75
Pbx1	7.68545e-79	0.431265	0.953	0.889	1.95449e-74
Elmod1	1.04444e-78	-0.350851	0.982	0.993	2.65612e-74
Gpm6a	1.42089e-78	0.357161	0.981	0.949	3.61345e-74
Smpd3	1.51573e-78	-0.442996	0.802	0.921	3.85465e-74
Rims1	3.44571e-78	0.347994	0.995	0.985	8.76279e-74
Slc4a10	9.67815e-78	0.424237	0.891	0.759	2.46125e-73
Car11	1.06413e-77	-0.41805	0.573	0.781	2.70619e-73
Ap1s1	3.7666e-77	-0.430829	0.37	0.619	9.57884e-73
Polr2a	4.50425e-77	0.396427	0.451	0.197	1.14548e-72
Ldlrad4	5.43321e-77	-0.56045	0.833	0.924	1.38172e-72
Trank1	8.6952e-77	-0.386325	0.9	0.967	2.21128e-72
Fam184b	3.15384e-76	-0.467537	0.351	0.59	8.02053e-72
Prickle2	5.09294e-76	0.427048	0.883	0.765	1.29518e-71
Tmem117	5.5487e-76	0.451525	0.709	0.494	1.41109e-71
Rtn3	5.9399e-76	0.357209	0.974	0.931	1.51058e-71
Rgs4	7.13969e-76	-0.45237	0.294	0.533	1.8157e-71
Syndig1l	9.32809e-76	-0.41161	0.361	0.605	2.37223e-71
Plk5	1.26983e-75	-0.298194	0.077	0.283	3.2293e-71
Prima1	1.41691e-75	-0.340459	0.086	0.294	3.60335e-71
Srsf11	1.57034e-75	0.351497	0.972	0.931	3.99354e-71
Tiparp	1.67255e-75	-0.562271	0.12	0.339	4.25346e-71
Per1	8.88859e-75	-0.408765	0.141	0.366	2.26046e-70
Sgk1	9.20983e-75	-0.543927	0.72	0.844	2.34215e-70
Rasd2	1.41335e-74	-0.404869	0.294	0.543	3.59429e-70
Nr3c2	1.90557e-74	0.440418	0.901	0.778	4.84604e-70
Rgs7bp	4.04449e-74	-0.422864	0.958	0.978	1.02855e-69
Tra2a	4.11343e-74	0.37861	0.936	0.839	1.04609e-69
Ndfip2	1.06183e-73	-0.498544	0.697	0.846	2.70034e-69
Gpatch8	1.20349e-73	0.327926	0.989	0.977	3.0606e-69
Fgd4	1.30551e-73	0.389006	0.43	0.181	3.32005e-69
Kctd17	2.76626e-73	-0.504225	0.448	0.653	7.03487e-69
Cdh13	3.18422e-73	-0.599978	0.698	0.842	8.09778e-69
Hras	3.67771e-73	-0.420641	0.37	0.611	9.35279e-69
Ptms	1.28988e-72	-0.387647	0.518	0.743	3.2803e-68
Calm1	1.72199e-72	-0.448183	0.914	0.972	4.37918e-68
Gabra2	1.87552e-72	0.38351	0.975	0.939	4.76964e-68
Ier5l	1.95229e-72	-0.332244	0.157	0.39	4.96486e-68
Crocc	3.10407e-72	-0.400863	0.325	0.566	7.89395e-68
Ehbp1	4.55259e-72	0.384755	0.86	0.713	1.15777e-67
Frmd4b	4.67671e-72	-0.456215	0.684	0.865	1.18934e-67
Abi3bp	4.69678e-72	-0.449893	0.089	0.29	1.19444e-67
Arid5b	5.04534e-72	0.458218	0.554	0.304	1.28308e-67
Lrtm1	7.415e-72	-0.450092	0.697	0.845	1.88571e-67
Pla2g3	1.0206e-71	-0.362087	0.205	0.442	2.5955e-67
Adamts6	1.72345e-71	0.369127	0.354	0.126	4.3829e-67
Fstl5	3.59593e-71	0.460624	0.841	0.677	9.14481e-67
Lrrc4c	5.48738e-71	0.298218	1	0.998	1.39549e-66
Syt2	1.01002e-70	-0.301555	0.103	0.313	2.56859e-66
Ngef	1.72086e-70	-0.408978	0.676	0.834	4.37631e-66
Baz2b	4.27083e-70	0.423626	0.854	0.7	1.08611e-65
Csmd2	4.86911e-70	0.408387	0.749	0.557	1.23826e-65
Cdh10	1.12816e-69	0.481217	0.75	0.534	2.86903e-65
Greb1l	1.42832e-69	0.406986	0.401	0.167	3.63237e-65
Cdk14	2.24176e-69	0.42008	0.551	0.312	5.70101e-65
Slc25a25	3.13994e-69	-0.41209	0.252	0.485	7.98517e-65
Gm45323	3.22292e-69	0.410297	0.313	0.098	8.19621e-65
Nsun7	5.04852e-69	0.394591	0.591	0.353	1.28389e-64
Cacng4	5.95962e-69	-0.404969	0.405	0.637	1.51559e-64
Zmym4	9.40572e-69	0.38254	0.861	0.73	2.39197e-64
Snrnp70	1.81058e-68	0.310423	0.992	0.975	4.60449e-64
Gm28494	3.02005e-68	-0.474215	0.138	0.348	7.6803e-64
Dennd1a	5.05541e-68	0.343363	0.97	0.928	1.28564e-63
Lrrtm4	8.92592e-68	0.386631	0.999	0.989	2.26995e-63
Dusp14	1.41124e-67	-0.422273	0.138	0.347	3.58893e-63
Lynx1	2.05799e-67	-0.378432	0.268	0.502	5.23368e-63
Gnb5	3.63913e-67	-0.398889	0.549	0.747	9.25467e-63
Cacnb2	5.51879e-67	-0.501504	0.996	0.997	1.40348e-62
Gabrb3	6.01904e-67	0.27922	0.999	0.996	1.5307e-62
Spry2	1.05801e-66	-0.404479	0.279	0.505	2.69062e-62
Eml6	1.81703e-66	0.369982	0.916	0.819	4.62088e-62
Ivns1abp	2.27642e-66	-0.464794	0.665	0.812	5.78915e-62
Epha6	4.5231e-66	0.33962	0.995	0.99	1.15027e-61
Slc8a2	7.46315e-66	-0.361079	0.337	0.574	1.89795e-61
Khdrbs2	1.67322e-65	0.535895	0.709	0.496	4.25516e-61
Atp2b2	2.23394e-65	-0.329656	0.96	0.991	5.68112e-61
Lrp1b	2.47928e-65	0.306978	1	0.998	6.30505e-61
Vav3	3.56747e-65	0.417006	0.548	0.307	9.07243e-61
Spred1	4.65061e-65	-0.403743	0.639	0.816	1.1827e-60
Mapk10	5.7768e-65	0.353716	0.954	0.918	1.4691e-60
Rgs20	6.38577e-65	-0.481896	0.754	0.882	1.62397e-60
Gng7	9.0169e-65	-0.361894	0.856	0.945	2.29309e-60
Plk2	9.4261e-65	-0.449777	0.501	0.698	2.39715e-60
Prkdc	9.92091e-65	0.384857	0.579	0.346	2.52299e-60
Ncor1	1.17915e-64	0.339718	0.928	0.841	2.99871e-60
Tenm1	1.79489e-64	0.423527	0.832	0.641	4.56457e-60
Camk2d	2.99184e-64	0.349216	0.344	0.121	7.60856e-60
Son	4.39031e-64	0.32223	0.999	0.986	1.1165e-59
Gm10848	1.3642e-63	-0.50436	0.452	0.642	3.46929e-59
Kansl1	3.92101e-63	0.339171	0.949	0.892	9.97152e-59
2210408I21Rik	4.40025e-63	0.437039	0.785	0.608	1.11903e-58
Pafah1b1	4.40542e-63	0.354761	0.929	0.833	1.12034e-58
Cntn6	5.65437e-63	0.431719	0.805	0.653	1.43796e-58
U2surp	1.3054e-62	0.363626	0.904	0.81	3.31977e-58
Ccdc187	1.81419e-62	-0.329665	0.195	0.415	4.61365e-58
Tmem191c	2.17217e-62	-0.385004	0.717	0.868	5.52405e-58
Stxbp6	2.70493e-62	0.439046	0.451	0.217	6.87892e-58
Nrcam	3.10701e-62	0.384282	0.921	0.861	7.90144e-58
Rit2	3.5311e-62	0.376482	0.925	0.846	8.97993e-58
Zfp207	3.5776e-62	0.35425	0.806	0.666	9.09819e-58
Kcnip4	1.50936e-61	0.315119	0.999	0.997	3.83846e-57
Tnrc6b	1.72695e-61	0.357344	0.928	0.853	4.3918e-57
Fam126a	2.15341e-61	0.353814	0.348	0.138	5.47633e-57
Ppp2r2a	2.198e-61	-0.398971	0.7	0.849	5.58973e-57
Grm1	2.6679e-61	-0.472093	0.872	0.93	6.78474e-57
Fign	2.72552e-61	0.343674	0.331	0.124	6.93128e-57
Fmnl2	3.5795e-61	0.338688	0.278	0.088	9.10303e-57
Mirg	5.23075e-61	0.382716	0.784	0.616	1.33023e-56
Setbp1	7.11534e-61	0.384832	0.874	0.774	1.8095e-56
St8sia3	8.51768e-61	-0.384205	0.611	0.781	2.16613e-56
Gm13269	9.68049e-61	-0.4731	0.546	0.709	2.46184e-56
Stxbp5l	1.88074e-60	0.321671	0.988	0.975	4.78291e-56
Ccdc85a	2.11422e-60	0.421294	0.622	0.403	5.37668e-56
Stk32a	2.70757e-60	-0.428615	0.566	0.744	6.88563e-56
Zmat4	3.07663e-60	-0.358154	0.162	0.369	7.82418e-56
Plcb1	3.84704e-60	-0.281977	0.999	1	9.78342e-56
Trip12	4.09337e-60	0.353033	0.867	0.749	1.04099e-55
Ramp1	5.03065e-60	-0.385112	0.443	0.646	1.27934e-55
Id4	5.23376e-60	-0.355382	0.201	0.413	1.331e-55
Kcnab1	6.98802e-60	-0.319376	0.994	0.996	1.77712e-55
Hjurp	9.08243e-60	0.350591	0.529	0.306	2.30975e-55
Upp2	9.33813e-60	0.4153	0.867	0.766	2.37478e-55
Gm47283	1.00416e-59	0.468091	0.873	0.751	2.55368e-55
Dlc1	2.32323e-59	0.389849	0.391	0.176	5.90821e-55
Pcdh11x	2.96692e-59	0.504276	0.753	0.564	7.54516e-55
Slc24a2	4.65533e-59	-0.362102	0.94	0.968	1.1839e-54
Epb41l4b	5.61431e-59	0.304881	0.306	0.108	1.42777e-54
Gm26871	7.36223e-59	0.347744	0.964	0.922	1.87229e-54
Kctd1	1.37085e-58	-0.378155	0.806	0.907	3.4862e-54
Ptchd4	1.67065e-58	0.393342	0.674	0.42	4.24862e-54
Cntn5	2.337e-58	-0.558453	0.985	0.984	5.94323e-54
Dync1i1	2.3438e-58	0.382657	0.886	0.795	5.96051e-54
Syp	2.47137e-58	0.361389	0.613	0.393	6.28493e-54
Sorcs2	5.4863e-58	-0.444516	0.471	0.665	1.39522e-53
Sez6	7.2072e-58	-0.398203	0.587	0.759	1.83286e-53
Pde1a	1.04556e-57	0.55866	0.391	0.169	2.65897e-53
Mbd5	1.22116e-57	0.291041	0.981	0.964	3.10552e-53
Ppp1ca	1.28416e-57	-0.363429	0.288	0.5	3.26575e-53
Lrrc10b	1.3178e-57	-0.313823	0.204	0.417	3.35129e-53
Lzts3	1.33113e-57	-0.353188	0.476	0.676	3.3852e-53
Dgkb	1.81406e-57	-0.255951	1	1	4.61334e-53
Cacna1a	2.29547e-57	0.313459	0.991	0.979	5.8376e-53
Stk3	2.44133e-57	0.353263	0.391	0.181	6.20855e-53
Gipc2	2.4758e-57	-0.407284	0.319	0.529	6.29621e-53
Dynll1	3.25345e-57	-0.375326	0.516	0.721	8.27386e-53
Gm45321	3.72423e-57	0.362136	0.313	0.111	9.4711e-53
D030068K23Rik	5.38492e-57	0.428889	0.457	0.242	1.36944e-52
Rnf144a	5.92348e-57	-0.34339	0.155	0.351	1.5064e-52
Gnaq	6.478e-57	0.354334	0.831	0.702	1.64742e-52
Gabrb1	6.58157e-57	0.379389	0.98	0.946	1.67376e-52
Dnajc6	1.05261e-56	0.360015	0.82	0.688	2.6769e-52
Sobp	1.67834e-56	0.37022	0.428	0.212	4.2682e-52
Strbp	1.70902e-56	0.282941	0.995	0.986	4.34621e-52
Sorbs1	3.51167e-56	-0.321431	0.921	0.969	8.93052e-52
Ppp1r2	4.80011e-56	-0.505028	0.638	0.769	1.22072e-51
Dcx	6.29344e-56	0.341221	0.422	0.21	1.60049e-51
Smc2	8.10997e-56	0.320181	0.353	0.151	2.06245e-51
Gpd1	1.1809e-55	-0.255504	0.086	0.258	3.00314e-51
Pard3	1.2183e-55	-0.349979	0.947	0.972	3.09825e-51
Ntrk3	1.5732e-55	-0.296744	0.983	0.993	4.0008e-51
Rem2	2.86958e-55	-0.28075	0.152	0.348	7.29762e-51
Elavl2	2.97995e-55	0.325435	0.324	0.126	7.57831e-51
Etv5	5.50336e-55	-0.291788	0.117	0.3	1.39956e-50
Gpr88	5.56023e-55	-0.409859	0.568	0.739	1.41402e-50
Gm48749	6.06458e-55	-0.423158	0.355	0.555	1.54228e-50
Inka2	1.05498e-54	-0.301374	0.212	0.417	2.68292e-50
Pou6f2	1.14793e-54	0.49291	0.553	0.34	2.9193e-50
Usp34	1.16445e-54	0.314378	0.947	0.882	2.96132e-50
Atp1a1	1.16489e-54	-0.356891	0.363	0.572	2.96244e-50
A830036E02Rik	2.18069e-54	0.375293	0.542	0.318	5.54571e-50
Spred2	2.27633e-54	-0.393029	0.422	0.618	5.78895e-50
Fubp1	2.57988e-54	0.320573	0.926	0.87	6.56089e-50
Ranbp17	3.59214e-54	0.382123	0.736	0.581	9.13516e-50
Sgk3	4.21905e-54	-0.377749	0.671	0.829	1.07295e-49
Gkap1	5.17135e-54	0.315902	0.376	0.169	1.31513e-49
Gnal	6.82059e-54	-0.273369	0.994	0.997	1.73454e-49
Atxn1	8.38294e-54	-0.285555	0.992	0.995	2.13187e-49
Ppp2r3a	9.50288e-54	0.360999	0.65	0.446	2.41668e-49
Slc24a3	1.20598e-53	0.431709	0.615	0.419	3.06694e-49
Zfhx3	1.66868e-53	0.475207	0.765	0.598	4.24361e-49
Cxxc4	1.97428e-53	0.330103	0.525	0.31	5.02078e-49
Camk1d	2.55135e-53	-0.307178	0.955	0.986	6.48833e-49
Cntnap5a	3.68304e-53	0.336602	0.98	0.896	9.36633e-49
Cdh12	4.49391e-53	0.499992	0.709	0.535	1.14285e-48
Lin7b	5.28819e-53	-0.327842	0.323	0.528	1.34484e-48
Wsb1	7.06485e-53	0.341649	0.573	0.364	1.79666e-48
Ube2e2	7.44151e-53	0.315765	0.969	0.923	1.89245e-48
Bcl11b	1.05455e-52	-0.327977	0.902	0.964	2.68182e-48
Gm2516	1.19363e-52	0.348329	0.32	0.126	3.03552e-48
Ncoa2	1.57164e-52	0.344082	0.836	0.707	3.99684e-48
Runx2	1.62782e-52	0.340807	0.45	0.239	4.13972e-48
Magi1	2.79628e-52	0.356872	0.767	0.604	7.11122e-48
Gabrb2	4.37412e-52	0.347147	0.923	0.85	1.11238e-47
Pak7	4.41255e-52	0.354154	0.756	0.588	1.12216e-47
Tmod1	1.33712e-51	-0.338253	0.347	0.555	3.40042e-47
Efr3b	2.15348e-51	-0.354545	0.537	0.714	5.47651e-47
Srrt	2.568e-51	-0.338599	0.382	0.579	6.53069e-47
Cog5	3.3436e-51	0.3522	0.772	0.629	8.5031e-47
Galnt18	3.38494e-51	-0.356478	0.724	0.863	8.60823e-47
9630028H03Rik	5.05794e-51	-0.424495	0.761	0.869	1.28629e-46
Tcf4	5.40563e-51	0.360253	0.501	0.293	1.37471e-46
4930598N05Rik	6.10819e-51	-0.288032	0.183	0.38	1.55337e-46
Pnisr	6.36842e-51	0.270755	0.988	0.967	1.61955e-46
Nr6a1	6.45989e-51	0.367148	0.778	0.647	1.64281e-46
Zfp706	7.2282e-51	-0.316793	0.276	0.478	1.8382e-46
AI593442	8.57771e-51	-0.353699	0.371	0.567	2.1814e-46
Gm36756	1.17471e-50	-0.288874	0.215	0.418	2.98741e-46
Fam193a	1.23282e-50	0.341672	0.754	0.605	3.13518e-46
Crip2	1.26733e-50	-0.289364	0.2	0.398	3.22294e-46
Celf4	1.54196e-50	0.350522	0.933	0.844	3.92136e-46
Coch	2.04312e-50	-0.348307	0.214	0.407	5.19585e-46
Unc13b	2.35435e-50	0.303061	0.424	0.222	5.98735e-46
B830012L14Rik	2.70129e-50	0.363719	0.777	0.642	6.86966e-46
Vsnl1	3.70021e-50	0.338256	0.42	0.212	9.40999e-46
Grm3	5.37245e-50	-0.452371	0.81	0.9	1.36627e-45
Tmem158	5.92922e-50	-0.359359	0.723	0.854	1.50786e-45
Gm48003	6.11939e-50	-0.36738	0.504	0.683	1.55622e-45
Cntn1	1.28355e-49	0.313055	0.98	0.959	3.26421e-45
Tbc1d4	1.60311e-49	-0.338302	0.228	0.426	4.07688e-45
Spata16	1.65721e-49	-0.363058	0.105	0.271	4.21445e-45
Zfhx4	1.97143e-49	0.342778	0.587	0.385	5.01354e-45
Tenm4	2.69026e-49	0.275919	0.996	0.983	6.8416e-45
D430041D05Rik	2.69846e-49	-0.361746	0.797	0.903	6.86244e-45
Gprasp2	3.10644e-49	0.299277	0.425	0.227	7.9e-45
Chuk	3.28286e-49	0.344152	0.706	0.555	8.34865e-45
Kcnk2	3.33079e-49	-0.56077	0.657	0.766	8.47053e-45
Cplane1	4.17109e-49	0.320268	0.906	0.833	1.06075e-44
Arel1	5.18347e-49	-0.357824	0.479	0.652	1.31821e-44
Epha5	5.56391e-49	0.40101	0.822	0.67	1.41496e-44
Rbm6	6.3351e-49	0.313704	0.906	0.816	1.61108e-44
Acvrl1	6.54213e-49	-0.266777	0.1	0.264	1.66373e-44
Prpf4b	8.32053e-49	0.296895	0.952	0.907	2.11599e-44
Sntg1	9.57052e-49	0.265987	0.997	0.996	2.43388e-44
Exd2	1.16604e-48	0.307759	0.53	0.328	2.96535e-44
Zmynd8	1.42429e-48	-0.343077	0.57	0.736	3.62211e-44
Sntb2	1.88465e-48	-0.382279	0.542	0.697	4.79285e-44
Bcr	2.46086e-48	-0.328588	0.728	0.843	6.25821e-44
Htr2c	2.54562e-48	0.456164	0.872	0.807	6.47375e-44
Cplx2	3.36789e-48	-0.343364	0.644	0.785	8.56489e-44
Kcnh3	3.70625e-48	-0.297795	0.279	0.478	9.42537e-44
Brinp3	3.83858e-48	0.646777	0.679	0.525	9.7619e-44
Pde4d	4.97529e-48	0.68394	0.472	0.284	1.26527e-43
Ccdc58	2.21578e-47	0.334483	0.537	0.348	5.63495e-43
Fmn2	3.04158e-47	0.328933	0.865	0.792	7.73504e-43
Selenom	3.47836e-47	-0.336668	0.314	0.506	8.84581e-43
Dmxl1	3.48284e-47	0.312543	0.839	0.74	8.85721e-43
Klhdc10	4.69405e-47	0.347843	0.749	0.622	1.19374e-42
Pcdh19	5.64696e-47	0.296422	0.288	0.115	1.43608e-42
Plekhg5	7.25194e-47	-0.282175	0.271	0.47	1.84424e-42
Kcnt1	7.30794e-47	-0.311189	0.662	0.814	1.85848e-42
4930509J09Rik	7.77315e-47	0.387644	0.575	0.376	1.97679e-42
Agk	1.08983e-46	0.315565	0.594	0.402	2.77154e-42
Foxn3	1.39305e-46	0.343577	0.422	0.231	3.54268e-42
Lims1	1.58169e-46	0.298546	0.39	0.197	4.02239e-42
Mast3	1.72304e-46	-0.315433	0.414	0.607	4.38186e-42
Slc9a9	1.8521e-46	0.31554	0.38	0.191	4.71008e-42
Mcu	2.21621e-46	0.352601	0.717	0.555	5.63604e-42
Hcn1	2.58286e-46	0.370825	0.546	0.349	6.56848e-42
Junb	3.53487e-46	-0.5866	0.288	0.475	8.98953e-42
1110051M20Rik	3.80873e-46	0.319563	0.823	0.715	9.68598e-42
Ano4	4.1155e-46	0.344006	0.464	0.267	1.04661e-41
Ptprz1	6.2747e-46	0.382957	0.457	0.266	1.59572e-41
Synpo2	1.15423e-45	-0.324073	0.155	0.329	2.93531e-41
Bcas3	1.35598e-45	0.32347	0.862	0.782	3.4484e-41
Camkk1	2.64148e-45	-0.252192	0.152	0.327	6.71756e-41
Pdp1	4.40504e-45	-0.316415	0.242	0.429	1.12025e-40
Samd5	6.52939e-45	-0.385408	0.648	0.775	1.66049e-40
Lingo2	8.4094e-45	0.259615	0.996	0.99	2.13859e-40
Cdc42ep3	9.5107e-45	-0.350779	0.43	0.604	2.41867e-40
Kif21a	1.05567e-44	0.293757	0.921	0.855	2.68467e-40
Sh3rf2	1.45368e-44	-0.435591	0.52	0.669	3.69687e-40
Gm26618	1.61081e-44	0.299369	0.43	0.243	4.09645e-40
Gm15680	1.87655e-44	-0.359036	0.253	0.434	4.77225e-40
L3mbtl3	2.34473e-44	0.342555	0.443	0.252	5.96289e-40
Foxo1	2.60206e-44	-0.38972	0.511	0.673	6.61729e-40
Tfrc	4.08715e-44	0.296561	0.526	0.331	1.0394e-39
Gm47423	5.10055e-44	-0.565383	0.208	0.374	1.29712e-39
Ptk2b	5.97369e-44	-0.289684	0.674	0.821	1.51917e-39
Gm38413	6.30566e-44	-0.291371	0.358	0.548	1.60359e-39
Nin	1.03332e-43	-0.305146	0.727	0.857	2.62784e-39
Hivep3	1.68318e-43	0.325539	0.751	0.604	4.2805e-39
Jcad	2.4001e-43	-0.342187	0.423	0.597	6.1037e-39
Ccdc88a	2.47557e-43	0.309072	0.857	0.752	6.29563e-39
Rock1	2.89747e-43	0.309307	0.861	0.762	7.36855e-39
Prrc2c	4.73365e-43	0.278243	0.897	0.813	1.20381e-38
Cipc	5.20212e-43	-0.306814	0.443	0.622	1.32295e-38
Rnf207	5.66078e-43	-0.303857	0.38	0.563	1.43959e-38
Ankrd45	7.10844e-43	0.284261	0.533	0.342	1.80775e-38
Acvr1c	7.49351e-43	-0.374294	0.43	0.599	1.90567e-38
Pcp4l1	1.43661e-42	-0.317364	0.4	0.583	3.65344e-38
Parp8	1.64753e-42	0.30838	0.478	0.287	4.18984e-38
B3gnt2	1.82221e-42	-0.346897	0.411	0.584	4.63406e-38
Strn3	2.14606e-42	0.278252	0.932	0.89	5.45765e-38
Wdfy3	2.27204e-42	0.295853	0.794	0.657	5.77803e-38
Slc25a13	2.40278e-42	0.28856	0.413	0.227	6.11052e-38
Hlf	2.69291e-42	-0.308168	0.391	0.573	6.84834e-38
Osbp2	2.94283e-42	-0.322387	0.71	0.838	7.48391e-38
Acer3	3.4164e-42	0.284951	0.487	0.295	8.68825e-38
Itga5	3.49361e-42	-0.277393	0.183	0.355	8.88461e-38
A330008L17Rik	3.76675e-42	-0.448625	0.379	0.547	9.57923e-38
Bbx	4.86529e-42	0.318053	0.694	0.534	1.23729e-37
Gm15813	4.88435e-42	-0.281588	0.286	0.47	1.24214e-37
Fam172a	5.18354e-42	0.311607	0.876	0.817	1.31823e-37
Gtdc1	5.20922e-42	0.337314	0.688	0.535	1.32476e-37
Nell2	5.69572e-42	0.2916	0.911	0.851	1.44848e-37
Gas5	8.29746e-42	0.312193	0.74	0.581	2.11013e-37
Gm42439	1.03653e-41	-0.310992	0.653	0.804	2.63599e-37
Kif1b	1.39898e-41	0.29216	0.927	0.862	3.55774e-37
Zcchc8	1.77132e-41	0.300709	0.552	0.376	4.50464e-37
Ildr2	1.90623e-41	0.291803	0.374	0.194	4.84773e-37
Slc44a5	2.81344e-41	0.324129	0.532	0.342	7.15485e-37
Rerg	3.84006e-41	-0.328736	0.322	0.506	9.76566e-37
Mast2	4.087e-41	0.314325	0.528	0.35	1.03936e-36
C530008M17Rik	4.25681e-41	0.270984	0.321	0.151	1.08255e-36
Ttyh3	5.15008e-41	-0.303079	0.361	0.533	1.30972e-36
Rbm26	5.17572e-41	0.268153	0.948	0.92	1.31624e-36
Cdh9	5.1803e-41	-0.461475	0.743	0.833	1.3174e-36
Sgcd	7.45999e-41	0.327409	0.854	0.73	1.89715e-36
Dgkz	7.49993e-41	-0.29813	0.459	0.623	1.90731e-36
Scg5	8.61478e-41	0.311718	0.912	0.85	2.19082e-36
Gcnt2	1.17444e-40	-0.355363	0.47	0.63	2.98673e-36
Tef	3.11662e-40	-0.277535	0.562	0.719	7.92588e-36
Srsf7	4.2242e-40	-0.26085	0.935	0.973	1.07426e-35
Icam5	5.26241e-40	-0.286026	0.412	0.59	1.33828e-35
Sbf2	7.52055e-40	0.278161	0.911	0.856	1.91255e-35
Deptor	7.93111e-40	-0.280047	0.151	0.312	2.01696e-35
Prelid3a	1.01985e-39	-0.28252	0.647	0.792	2.59357e-35
Pde1c	1.24252e-39	-0.569178	0.555	0.714	3.15986e-35
Nalcn	1.34318e-39	0.272688	0.951	0.917	3.41583e-35
Ncam1	1.52267e-39	0.297614	0.954	0.908	3.87231e-35
Lin28b	1.77944e-39	0.331299	0.746	0.629	4.52531e-35
Cpeb3	1.89204e-39	0.259634	0.923	0.865	4.81165e-35
Efna5	2.235e-39	0.430121	0.689	0.537	5.68382e-35
Tgfa	2.36385e-39	-0.310803	0.463	0.624	6.01152e-35
Pclo	4.31438e-39	0.254688	0.974	0.958	1.09719e-34
Spata1	4.7113e-39	0.254482	0.337	0.17	1.19813e-34
Ypel2	4.78537e-39	-0.302433	0.67	0.815	1.21697e-34
Sv2c	5.09365e-39	-0.311673	0.658	0.806	1.29537e-34
Dusp12	6.36307e-39	-0.276088	0.313	0.489	1.61819e-34
Myo9a	7.01475e-39	0.270741	0.941	0.883	1.78392e-34
Gm16105	7.02851e-39	-0.282255	0.366	0.537	1.78742e-34
Ssh2	9.76289e-39	0.286508	0.845	0.734	2.4828e-34
Gm30382	2.24311e-38	0.409273	0.62	0.45	5.70445e-34
Med12l	2.29464e-38	0.301438	0.795	0.686	5.8355e-34
Chchd10	2.54112e-38	-0.349877	0.613	0.745	6.46233e-34
Gm1043	2.61421e-38	-0.296224	0.562	0.709	6.6482e-34
Npat	3.8315e-38	0.275711	0.469	0.293	9.74388e-34
Arid3b	4.13302e-38	-0.269125	0.221	0.387	1.05107e-33
Rsrc1	4.3469e-38	0.307999	0.756	0.631	1.10546e-33
Gm26917	4.52036e-38	0.316941	0.668	0.523	1.14957e-33
Irf2	6.79396e-38	0.265061	0.463	0.283	1.72777e-33
Pdss2	7.15016e-38	0.296159	0.643	0.487	1.81836e-33
Kdm3a	1.13363e-37	-0.311605	0.408	0.573	2.88294e-33
Cacna1d	1.26884e-37	0.257788	0.957	0.919	3.22678e-33
Bcl11a	1.28773e-37	0.286896	0.843	0.747	3.27483e-33
Cnksr2	1.31396e-37	-0.261638	0.976	0.989	3.34154e-33
Tnr	1.32346e-37	0.294999	0.861	0.772	3.3657e-33
Mlf2	1.46886e-37	-0.29402	0.408	0.575	3.73546e-33
Ftx	1.4798e-37	0.271245	0.911	0.865	3.76329e-33
Sik3	1.51057e-37	-0.330036	0.852	0.915	3.84153e-33
Ext1	1.75187e-37	0.310727	0.774	0.655	4.45518e-33
Rufy3	1.9335e-37	0.283671	0.778	0.674	4.91708e-33
Mt1	2.16594e-37	-0.307726	0.251	0.417	5.5082e-33
Larp1b	3.16935e-37	0.2739	0.33	0.168	8.05998e-33
Tomm20	4.02656e-37	-0.280713	0.432	0.601	1.02399e-32
Trpc6	5.66694e-37	-0.271759	0.138	0.287	1.44116e-32
Celf1	5.8081e-37	-0.275083	0.885	0.95	1.47706e-32
Gm13974	6.28373e-37	-0.392455	0.235	0.392	1.59802e-32
Sox8	7.48305e-37	-0.299298	0.273	0.436	1.90301e-32
Sh3bgrl3	1.08867e-36	-0.284304	0.326	0.499	2.7686e-32
C2cd2	1.41656e-36	-0.363367	0.385	0.541	3.60245e-32
Rpgr	1.4684e-36	0.299449	0.704	0.568	3.73429e-32
Pcca	1.68516e-36	0.28292	0.749	0.628	4.28554e-32
Vstm2a	2.60663e-36	0.291462	0.585	0.403	6.62891e-32
Dennd1b	2.9323e-36	0.272276	0.76	0.629	7.45714e-32
Pcdh10	2.95686e-36	0.308866	0.768	0.633	7.5196e-32
Nagk	2.99192e-36	0.264539	0.462	0.285	7.60876e-32
Limk2	3.10466e-36	0.264455	0.476	0.304	7.89546e-32
Pabpn1	3.35534e-36	0.299011	0.772	0.662	8.53295e-32
Mink1	4.07451e-36	-0.267366	0.633	0.789	1.03619e-31
Ei24	5.04409e-36	0.256543	0.502	0.326	1.28276e-31
Tenm2	6.6942e-36	0.332663	0.992	0.973	1.7024e-31
Nlk	7.85057e-36	0.29108	0.875	0.806	1.99648e-31
Magi3	1.08383e-35	0.295696	0.57	0.402	2.75628e-31
Cnrip1	1.08396e-35	0.272546	0.468	0.296	2.75662e-31
Egr1	1.27514e-35	-0.323951	0.251	0.412	3.24282e-31
Aak1	1.35393e-35	0.252986	0.917	0.866	3.44318e-31
2610316D01Rik	1.39001e-35	0.306697	0.468	0.292	3.53493e-31
Mlip	1.50479e-35	0.304789	0.559	0.386	3.82684e-31
Ptma	1.60842e-35	-0.274728	0.301	0.473	4.09038e-31
Rcan2	1.76992e-35	-0.295012	0.816	0.902	4.50108e-31
Srgap3	1.98257e-35	0.264719	0.87	0.792	5.04187e-31
Ttyh1	2.25549e-35	-0.261417	0.649	0.793	5.73593e-31
H2afz	2.40917e-35	-0.308167	0.444	0.604	6.12677e-31
Slc24a4	2.61238e-35	-0.302523	0.512	0.657	6.64355e-31
Frmd5	3.60265e-35	0.302295	0.877	0.763	9.1619e-31
Kif26b	8.4872e-35	0.293951	0.666	0.517	2.15838e-30
Garem1	8.74145e-35	-0.339169	0.574	0.711	2.22304e-30
Klhl7	8.77779e-35	0.275528	0.815	0.726	2.23228e-30
Rnf112	1.2395e-34	-0.285303	0.542	0.673	3.15218e-30
Acyp2	1.32055e-34	0.324234	0.687	0.555	3.35829e-30
Arid4b	1.34139e-34	0.274887	0.807	0.722	3.41128e-30
Tmsb4x	1.35976e-34	-0.310522	0.529	0.686	3.458e-30
Snrnp48	1.39931e-34	0.2858	0.678	0.539	3.55859e-30
Slc8a1	1.46242e-34	0.436179	0.339	0.187	3.71907e-30
Fndc9	1.60487e-34	-0.30493	0.539	0.673	4.08135e-30
Gigyf2	1.91946e-34	0.276905	0.732	0.607	4.88137e-30
Pitpnm2	1.92959e-34	-0.275504	0.425	0.583	4.90715e-30
Supt20	2.01548e-34	0.280303	0.709	0.58	5.12558e-30
Tsnax	2.45519e-34	0.273112	0.756	0.649	6.2438e-30
Chgb	3.93867e-34	-0.31388	0.314	0.475	1.00164e-29
Scamp1	3.94189e-34	-0.262215	0.548	0.705	1.00246e-29
Trim9	4.12569e-34	-0.301678	0.713	0.827	1.04921e-29
5730522E02Rik	4.79102e-34	0.251294	0.984	0.972	1.2184e-29
Smg6	8.69825e-34	0.276503	0.806	0.704	2.21205e-29
Cox16	9.68345e-34	0.298503	0.835	0.769	2.4626e-29
Rps6ka3	1.12005e-33	0.274911	0.904	0.85	2.8484e-29
Dlg1	1.24038e-33	0.27493	0.894	0.831	3.1544e-29
Cacng3	1.27372e-33	-0.290594	0.672	0.796	3.23921e-29
Cap1	1.62756e-33	-0.310902	0.472	0.609	4.13906e-29
Firre	1.85296e-33	0.266454	0.578	0.421	4.71227e-29
4930567K20Rik	1.91996e-33	-0.295174	0.252	0.41	4.88265e-29
Vti1b	1.98028e-33	-0.281859	0.606	0.741	5.03604e-29
Cspp1	2.62266e-33	0.263996	0.896	0.825	6.66969e-29
Mir99ahg	3.50803e-33	0.353676	0.813	0.716	8.92128e-29
Patj	3.75713e-33	0.256626	0.455	0.289	9.55475e-29
Zfp804a	3.9197e-33	0.341519	0.809	0.714	9.96818e-29
Gbf1	4.50487e-33	0.272011	0.719	0.597	1.14563e-28
Acat1	6.89942e-33	0.276453	0.662	0.522	1.75459e-28
Ccnl1	7.79639e-33	0.283945	0.704	0.593	1.9827e-28
Vezt	8.32795e-33	0.265997	0.682	0.546	2.11788e-28
Egr3	9.60639e-33	-0.273986	0.119	0.251	2.443e-28
Lars	1.0718e-32	0.265489	0.642	0.493	2.7257e-28
Uhrf1bp1l	1.23956e-32	0.258642	0.606	0.442	3.15232e-28
Asic2	1.46754e-32	0.407308	0.874	0.82	3.73211e-28
Ccm2	1.5213e-32	-0.259584	0.362	0.521	3.86882e-28
Phip	1.91577e-32	0.296632	0.759	0.634	4.87198e-28
Rab6b	2.52403e-32	-0.266475	0.625	0.751	6.41886e-28
Fkbp1a	3.27285e-32	-0.271764	0.623	0.753	8.32318e-28
Ccdc148	3.31852e-32	0.286233	0.704	0.569	8.43933e-28
Eif4g3	5.64319e-32	0.251348	0.796	0.71	1.43512e-27
4930428E07Rik	7.24152e-32	-0.325248	0.397	0.54	1.84159e-27
Uty	7.53897e-32	0.271273	0.719	0.604	1.91724e-27
Adarb2	7.55197e-32	0.489647	0.657	0.544	1.92054e-27
Scn1a	7.70839e-32	0.253429	0.921	0.883	1.96032e-27
Chchd2	7.74932e-32	-0.304244	0.514	0.668	1.97073e-27
Sos2	9.40685e-32	0.250988	0.532	0.373	2.39225e-27
Srgap2	1.62695e-31	0.263231	0.817	0.712	4.1375e-27
Lrrn3	2.52016e-31	0.252288	0.455	0.296	6.40901e-27
Kdm5b	2.69969e-31	0.263767	0.693	0.558	6.86559e-27
Osbpl6	3.85935e-31	0.275521	0.814	0.729	9.81472e-27
Hs6st3	3.97798e-31	-0.319598	0.958	0.982	1.01164e-26
Rassf8	4.15997e-31	-0.286697	0.579	0.713	1.05792e-26
Tbc1d30	5.73495e-31	-0.286666	0.359	0.507	1.45846e-26
Coq10b	6.89443e-31	-0.315772	0.3	0.45	1.75332e-26
Dlgap1	6.98578e-31	0.255433	0.964	0.94	1.77655e-26
Klhl2	7.31839e-31	-0.285372	0.769	0.856	1.86114e-26
AW554918	7.33178e-31	0.27035	0.599	0.46	1.86455e-26
Tmem130	7.35667e-31	0.261499	0.566	0.403	1.87088e-26
Sort1	8.17959e-31	-0.256295	0.534	0.684	2.08015e-26
2610037D02Rik	1.05301e-30	0.272251	0.608	0.466	2.67792e-26
Eda	1.58071e-30	0.280739	0.358	0.205	4.0199e-26
Sub1	1.80888e-30	-0.29463	0.448	0.584	4.60017e-26
Zcwpw2	2.25541e-30	0.253834	0.361	0.214	5.73574e-26
Ep300	2.40714e-30	0.257168	0.596	0.454	6.12159e-26
Ric8b	2.42728e-30	-0.250331	0.853	0.916	6.17282e-26
Ntrk2	2.42812e-30	-0.389257	0.84	0.886	6.17495e-26
Phlpp2	2.61445e-30	0.254238	0.481	0.325	6.64881e-26
Ano2	2.84707e-30	-0.299532	0.441	0.598	7.24037e-26
Akap5	3.97238e-30	-0.271036	0.4	0.547	1.01021e-25
Mnat1	5.28368e-30	0.260143	0.613	0.475	1.34369e-25
Letm2	6.72523e-30	0.255127	0.585	0.435	1.71029e-25
Thsd7a	9.21618e-30	-0.308067	0.92	0.942	2.34377e-25
Atxn7	9.2949e-30	0.253876	0.569	0.419	2.36379e-25
Gm47591	1.1303e-29	-0.25382	0.373	0.522	2.87446e-25
Wnk1	1.25542e-29	0.267897	0.764	0.672	3.19265e-25
Ankrd33b	1.26251e-29	-0.279144	0.504	0.641	3.2107e-25
Chm	1.65423e-29	0.261682	0.66	0.536	4.20686e-25
Ndufa4	2.4265e-29	-0.312262	0.583	0.712	6.17083e-25
Tbc1d5	2.53074e-29	0.272611	0.788	0.695	6.43593e-25
Rps6ka5	2.71175e-29	-0.295342	0.72	0.826	6.89626e-25
Gm1604a	2.97774e-29	-0.267416	0.564	0.679	7.57269e-25
Dgkg	5.23679e-29	0.273232	0.496	0.339	1.33177e-24
Cox8a	6.66562e-29	-0.296803	0.552	0.681	1.69513e-24
Garnl3	8.00162e-29	0.282751	0.667	0.54	2.03489e-24
Adk	9.58149e-29	0.262657	0.47	0.327	2.43667e-24
Bmerb1	1.22158e-28	0.258134	0.667	0.547	3.1066e-24
Pan3	1.50136e-28	0.259209	0.781	0.699	3.81812e-24
Oxr1	1.71696e-28	0.286649	0.572	0.427	4.36641e-24
Hecw1	1.75233e-28	0.261154	0.849	0.77	4.45636e-24
Kcnh7	1.83068e-28	0.329673	0.776	0.642	4.65561e-24
Gm42418	2.77882e-28	-0.324849	1	1	7.06681e-24
Ppm1l	2.82273e-28	0.252107	0.394	0.244	7.17848e-24
Dpyd	2.98371e-28	0.330053	0.298	0.161	7.58787e-24
Col25a1	5.44203e-28	0.257673	0.648	0.49	1.38396e-23
AC149090.1	6.69059e-28	-0.253455	0.964	0.993	1.70148e-23
Kcnt2	8.77405e-28	0.251363	0.317	0.175	2.23133e-23
Kmt2c	9.30969e-28	0.254771	0.78	0.694	2.36755e-23
Dusp3	1.58827e-27	-0.252191	0.245	0.385	4.03913e-23
Arhgap32	1.69622e-27	-0.255653	0.819	0.901	4.31366e-23
BC005561	1.83912e-27	0.256237	0.678	0.556	4.67706e-23
Snap91	2.75207e-27	0.251821	0.742	0.658	6.9988e-23
Lin7a	3.06409e-27	0.277948	0.679	0.55	7.79228e-23
Immp2l	5.06226e-27	0.273791	0.869	0.812	1.28738e-22
Sorbs2os	5.38036e-27	-0.26147	0.53	0.65	1.36828e-22
Cntnap5b	8.76144e-27	0.272291	0.817	0.732	2.22812e-22
Gm2164	1.48416e-26	-0.343203	0.464	0.591	3.77437e-22
Pcsk1n	1.5432e-26	0.292039	0.857	0.814	3.92451e-22
Rgs2	1.95222e-26	-0.285892	0.264	0.398	4.96468e-22
Caly	5.16271e-26	-0.255932	0.715	0.826	1.31293e-21
Gprin3	7.66518e-26	-0.279718	0.768	0.849	1.94933e-21
Cadm1	9.06906e-26	0.348695	0.858	0.773	2.30635e-21
Onecut2	1.78699e-25	0.254024	0.709	0.575	4.54449e-21
Prkd1	1.82316e-25	-0.336693	0.536	0.661	4.63648e-21
Edil3	2.58753e-25	0.27986	0.653	0.513	6.58034e-21
Galnt17	3.13748e-25	-0.354121	0.431	0.564	7.97892e-21
Igsf11	3.21627e-25	-0.25218	0.533	0.669	8.1793e-21
Itgav	3.27428e-25	0.255277	0.612	0.477	8.32683e-21
Klf9	4.46917e-25	-0.250586	0.415	0.545	1.13656e-20
Rpl27a	6.26263e-25	-0.258518	0.479	0.615	1.59265e-20
Smg5	1.42845e-24	-0.261746	0.47	0.592	3.63268e-20
Tcaf1	2.28492e-24	-0.259026	0.686	0.797	5.81077e-20
Ust	6.31818e-24	0.272748	0.691	0.574	1.60678e-19
Rgs6	1.01664e-23	0.288107	0.376	0.239	2.58542e-19
Pbx3	1.04805e-23	0.278976	0.884	0.831	2.66529e-19
Tlk1	1.22106e-23	-0.250168	0.617	0.722	3.10527e-19
Nexmif	8.88861e-23	0.254872	0.54	0.412	2.26046e-18
March1	1.00574e-22	0.449292	0.413	0.288	2.5577e-18
Schip1	1.41211e-22	0.295315	0.761	0.666	3.59115e-18
4930415C11Rik	1.54152e-22	-0.361152	0.317	0.429	3.92025e-18
Srgap1	3.65893e-22	-0.285296	0.781	0.846	9.30502e-18
Cdh4	1.00319e-21	-0.287458	0.165	0.283	2.55121e-17
Prkg1	8.1521e-21	0.46979	0.653	0.588	2.07316e-16
Nkain3	1.76726e-20	0.25755	0.761	0.654	4.49431e-16
Rxrg	5.08766e-19	-0.251181	0.349	0.46	1.29384e-14
Ccnd2	3.53574e-16	-0.304559	0.347	0.432	8.99174e-12
Sik2	5.46847e-16	-0.260004	0.575	0.66	1.39069e-11
Nnat	1.46554e-15	-0.390603	0.366	0.467	3.72701e-11
Pdzrn4	2.76456e-14	0.254308	0.61	0.52	7.03055e-10
Erbb4	8.77945e-14	0.271239	0.579	0.471	2.2327e-09
Gpr155	1.02896e-13	-0.344763	0.559	0.607	2.61675e-09
Unc13c	8.54535e-11	-0.279937	0.902	0.892	2.17317e-06

## Sheet: thiamine_cluster1R61vvsNTv
Column1	p_val	avg_log2FC	pct.1	pct.2	p_val_adj
Cmss1	2.49076e-164	-0.798765	0.999	1	6.33424e-160
Pcp4	1.44454e-75	-0.727876	0.861	0.943	3.6736e-71
Tmeff2	6.64901e-74	0.519216	1	1	1.69091e-69
Pde4b	1.07488e-60	0.37503	1	1	2.73354e-56
Penk	4.5716e-56	-0.689557	0.218	0.491	1.1626e-51
Adipor2	4.23845e-53	-0.730573	0.449	0.691	1.07788e-48
Anks1b	3.55559e-52	0.526976	1	0.996	9.04222e-48
Fth1	4.81543e-50	-0.605446	0.997	1	1.22461e-45
Gm42418	6.56359e-48	-0.315104	1	1	1.66919e-43
Nrgn	3.94233e-45	-0.512722	0.842	0.921	1.00257e-40
Kctd13	2.0689e-44	-0.582799	0.491	0.705	5.26142e-40
Tmsb4x	1.07468e-43	-0.561304	0.843	0.929	2.73303e-39
Magi2	8.47333e-43	0.307121	1	1	2.15485e-38
Camk1d	4.93101e-42	-0.443642	0.96	0.991	1.254e-37
Auts2	6.2932e-41	0.460833	1	0.996	1.60042e-36
Pcdh9	9.16468e-39	0.294494	1	1	2.33067e-34
Stmn1	2.42201e-34	-0.514269	0.673	0.806	6.15941e-30
Lrp1b	2.57819e-34	0.295393	0.998	1	6.5566e-30
Dbndd2	1.42257e-33	-0.486894	0.814	0.888	3.61774e-29
B3galt1	5.78383e-33	0.39329	0.999	0.997	1.47088e-28
Slc38a2	1.75021e-32	-0.498007	0.571	0.748	4.45095e-28
AY036118	3.18321e-32	-0.31501	1	1	8.09522e-28
Gm10863	7.60769e-32	0.487524	0.522	0.321	1.93471e-27
Dbi	3.74562e-31	-0.537023	0.598	0.749	9.52548e-27
Sez6l2	6.17889e-30	-0.476806	0.357	0.57	1.57135e-25
Cadps	6.44145e-30	0.437378	0.941	0.902	1.63813e-25
Gria4	2.72176e-29	0.462611	0.986	0.965	6.92171e-25
Dlg2	4.83003e-28	0.269377	1	1	1.22833e-23
Cdk8	7.56958e-28	-0.348681	0.913	0.953	1.92502e-23
Mat2a	8.18087e-28	-0.432859	0.538	0.694	2.08048e-23
Calm1	6.45167e-27	-0.343576	0.964	0.99	1.64073e-22
Erbb4	9.88004e-27	0.442325	0.983	0.971	2.51259e-22
Sgk1	1.06675e-26	-0.505112	0.242	0.408	2.71285e-22
Cryab	2.73192e-26	-0.450242	0.788	0.874	6.94754e-22
Glul	4.9586e-26	-0.478368	0.494	0.648	1.26102e-21
Gm4221	5.84291e-26	0.455652	0.451	0.276	1.48591e-21
Ppp1r14a	8.95181e-26	-0.442754	0.663	0.782	2.27654e-21
Calm2	1.24484e-25	-0.354573	0.971	0.987	3.16575e-21
Meg3	2.25336e-25	0.39452	0.985	0.986	5.73051e-21
Dock10	4.23534e-25	0.291039	1	1	1.07709e-20
Ncam2	1.14774e-24	0.393166	0.998	0.998	2.91883e-20
Sytl2	1.42714e-24	0.415834	0.798	0.677	3.62936e-20
7630403G23Rik	1.69771e-24	0.551813	0.437	0.265	4.31745e-20
Rims2	6.57906e-24	0.318226	0.981	0.943	1.67312e-19
Tppp3	1.022e-23	-0.399978	0.102	0.254	2.59906e-19
Arpp21	2.26098e-23	-0.338172	0.944	0.955	5.7499e-19
Mal	2.58722e-23	-0.359972	0.928	0.964	6.57957e-19
March1	6.14663e-23	0.445595	0.938	0.929	1.56315e-18
Lsamp	7.91764e-23	0.347127	0.997	0.987	2.01353e-18
Rnf220	5.23737e-22	0.327047	0.989	0.973	1.33192e-17
Gm44866	1.12316e-21	-0.37217	0.11	0.261	2.85632e-17
Vmp1	1.95707e-21	-0.292481	0.965	0.982	4.97703e-17
Frmd5	2.59443e-21	0.270274	1	1	6.59789e-17
Selenop	5.89435e-21	-0.443412	0.219	0.384	1.49899e-16
Nfia	7.28058e-21	0.371179	0.855	0.748	1.85152e-16
Rhou	9.45996e-21	-0.39195	0.482	0.626	2.40576e-16
St18	2.10674e-20	0.268173	0.999	0.999	5.35765e-16
Ppia	3.24648e-20	-0.314061	0.983	0.994	8.25611e-16
Cldn11	3.35182e-20	-0.314067	0.835	0.906	8.52402e-16
Rsrp1	3.86345e-20	-0.288531	0.999	0.997	9.82513e-16
Grid2	4.30575e-20	0.335577	0.996	0.997	1.095e-15
Gm36855	5.32828e-20	-0.399322	0.133	0.281	1.35503e-15
Cox4i1	8.06465e-20	-0.329109	0.844	0.919	2.05092e-15
Ermn	1.18189e-19	-0.336242	0.692	0.792	3.00567e-15
Unc5c	1.42153e-19	0.317239	0.988	0.989	3.6151e-15
Arpp19	4.7826e-19	-0.381929	0.249	0.403	1.21626e-14
Zbtb20	6.08912e-19	0.252641	1	0.999	1.54852e-14
Ckb	7.15339e-19	-0.306653	0.991	0.995	1.81918e-14
Stmn4	8.67218e-19	-0.308276	0.801	0.861	2.20542e-14
Slc13a1	1.18852e-18	0.358196	0.469	0.31	3.02252e-14
Sema6a	2.68413e-18	0.362408	0.752	0.626	6.82602e-14
Sec11c	2.86897e-18	-0.331002	0.646	0.76	7.29608e-14
Pde10a	7.47588e-18	-0.283602	0.951	0.959	1.90119e-13
Tuba1a	1.2878e-17	-0.366541	0.887	0.931	3.27501e-13
Csmd2	1.33779e-17	0.391489	0.529	0.402	3.40214e-13
Nkx6-2	1.41946e-17	-0.368483	0.301	0.449	3.60982e-13
Nrxn3	1.53341e-17	0.337636	0.979	0.977	3.89961e-13
Tcf12	1.74104e-17	0.266471	0.997	0.992	4.42764e-13
Pacrg	1.95641e-17	-0.3288	0.793	0.873	4.97534e-13
A230001M10Rik	2.51636e-17	0.361109	0.71	0.59	6.39935e-13
Crppa	3.45908e-17	0.348476	0.522	0.376	8.79678e-13
Rpsa	4.70977e-17	-0.361142	0.41	0.551	1.19774e-12
Exoc4	6.20345e-17	0.274538	0.981	0.971	1.5776e-12
Tra2a	7.06636e-17	0.258071	0.967	0.954	1.79705e-12
Gstm5	7.12379e-17	-0.328087	0.256	0.41	1.81165e-12
Ppp1r1b	8.21972e-17	-0.33445	0.15	0.286	2.09036e-12
Ptgds	1.03648e-16	-0.814333	0.863	0.866	2.63587e-12
Psat1	1.57377e-16	-0.325526	0.245	0.392	4.00225e-12
Mdga2	1.63399e-16	0.291674	1	0.999	4.1554e-12
Csrp1	2.37037e-16	-0.308116	0.702	0.789	6.02808e-12
A230057D06Rik	1.33025e-15	0.292375	0.944	0.916	3.38297e-11
Rpl19	1.85701e-15	-0.323996	0.446	0.58	4.72257e-11
Eif1	2.94451e-15	-0.273993	0.97	0.977	7.48817e-11
Ndufa7	3.27423e-15	-0.31594	0.205	0.343	8.32668e-11
Rplp1	3.68119e-15	-0.349774	0.427	0.556	9.36164e-11
Fbxw15	4.17957e-15	-0.353125	0.141	0.266	1.06291e-10
Rpl24	5.75698e-15	-0.36859	0.397	0.528	1.46406e-10
A330015K06Rik	1.01862e-14	-0.265753	0.921	0.953	2.59045e-10
Phgdh	1.60603e-14	-0.305465	0.299	0.433	4.0843e-10
Mt1	3.32021e-14	-0.362663	0.344	0.478	8.44362e-10
4930420G21Rik	3.53966e-14	0.392635	0.641	0.544	9.0017e-10
Arap2	3.64835e-14	0.308775	0.627	0.507	9.27813e-10
Rpl13	4.96979e-14	-0.301302	0.717	0.813	1.26387e-09
Gng11	5.26592e-14	-0.379123	0.404	0.524	1.33918e-09
Gpx4	5.4207e-14	-0.324406	0.437	0.556	1.37854e-09
Camk2n1	5.53049e-14	-0.308766	0.168	0.291	1.40646e-09
Hint1	7.45264e-14	-0.302148	0.29	0.425	1.89528e-09
Tmem258	8.53895e-14	-0.321496	0.216	0.344	2.17154e-09
Rpl27a	8.9907e-14	-0.314748	0.462	0.586	2.28643e-09
Naaladl2	9.35109e-14	0.321958	0.951	0.926	2.37808e-09
Tnik	1.20832e-13	0.30259	0.955	0.942	3.07287e-09
Tjp1	1.40501e-13	0.250798	0.971	0.957	3.57308e-09
Prkn	3.87248e-13	0.258677	0.997	0.985	9.84811e-09
Abca8b	4.55341e-13	0.266395	0.342	0.224	1.15798e-08
Slc8a3	6.20104e-13	0.302589	0.401	0.278	1.57699e-08
Tmod2	7.53262e-13	-0.292211	0.592	0.699	1.91562e-08
Mettl7a1	8.09832e-13	-0.306262	0.32	0.441	2.05948e-08
Cntn1	8.44656e-13	0.264068	0.897	0.871	2.14805e-08
Oaz1	8.93374e-13	-0.277238	0.566	0.685	2.27194e-08
Ptma	9.32669e-13	-0.274001	0.766	0.817	2.37187e-08
Qdpr	1.56727e-12	-0.301228	0.672	0.752	3.98571e-08
Rps3	1.68674e-12	-0.288227	0.361	0.478	4.28956e-08
Rnf7	2.49823e-12	-0.326371	0.344	0.454	6.35326e-08
Slc9a9	2.55029e-12	0.288251	0.526	0.393	6.48565e-08
Rpl6	2.71251e-12	-0.296829	0.731	0.804	6.89818e-08
Plekhg1	2.87851e-12	0.300488	0.74	0.686	7.32034e-08
Ndufa13	3.89128e-12	-0.272203	0.309	0.437	9.89591e-08
Rps27a	4.39616e-12	-0.318061	0.311	0.436	1.11799e-07
Negr1	4.57797e-12	0.268271	0.981	0.971	1.16422e-07
Tnfaip6	5.00516e-12	-0.308049	0.456	0.557	1.27286e-07
Selenok	6.59952e-12	-0.289712	0.55	0.657	1.67832e-07
Ppp1cc	8.29947e-12	-0.325044	0.292	0.404	2.11064e-07
Reep5	8.45866e-12	-0.287749	0.674	0.744	2.15112e-07
Rpl37	9.22311e-12	-0.286364	0.268	0.389	2.34553e-07
Pde7a	1.12506e-11	0.289874	0.33	0.223	2.86114e-07
Cox7a2	1.17584e-11	-0.311533	0.273	0.393	2.99029e-07
Rps29	1.17877e-11	-0.303091	0.333	0.454	2.99774e-07
Nrxn1	1.51398e-11	0.322947	0.97	0.966	3.8502e-07
Tsc22d4	2.14165e-11	-0.293657	0.366	0.482	5.44643e-07
Btf3	2.37446e-11	-0.266503	0.3	0.422	6.0385e-07
Cox7c	4.67883e-11	-0.260503	0.541	0.644	1.18987e-06
Spock1	4.84214e-11	-0.262196	0.778	0.84	1.2314e-06
Ubc	5.19978e-11	-0.274384	0.609	0.681	1.32236e-06
Fis1	6.86749e-11	-0.297475	0.303	0.413	1.74647e-06
Synpr	8.97504e-11	0.416998	0.356	0.252	2.28244e-06
Rpl14	1.0485e-10	-0.277871	0.271	0.384	2.66643e-06
Zfp608	1.04973e-10	0.297858	0.514	0.404	2.66956e-06
Chchd2	1.07449e-10	-0.254373	0.49	0.605	2.73254e-06
Ablim2	1.48985e-10	0.256292	0.927	0.907	3.78885e-06
Dynll1	1.87354e-10	-0.270013	0.31	0.424	4.7646e-06
Kirrel3	1.94628e-10	0.402526	0.977	0.964	4.94958e-06
Rps17	2.98866e-10	-0.261192	0.188	0.288	7.60046e-06
Selenom	4.66819e-10	-0.289645	0.32	0.421	1.18717e-05
Cox5b	5.05168e-10	-0.272492	0.351	0.457	1.28469e-05
Sh3bgrl3	5.45395e-10	-0.253799	0.275	0.389	1.38699e-05
Rpl38	5.99618e-10	-0.274245	0.283	0.384	1.52489e-05
Rpl15	6.31012e-10	-0.275068	0.341	0.448	1.60473e-05
Rhog	9.61897e-10	-0.252273	0.324	0.426	2.4462e-05
Rps8	1.14031e-09	-0.26952	0.619	0.701	2.89991e-05
Cdh10	1.26345e-09	0.284023	0.967	0.946	3.21309e-05
Fau	2.13145e-09	-0.275751	0.546	0.631	5.42048e-05
Prickle1	2.32199e-09	0.35558	0.906	0.892	5.90504e-05
Ccser1	2.33544e-09	0.286114	0.96	0.953	5.93926e-05
Atp5d	2.58653e-09	-0.250306	0.23	0.33	6.57781e-05
Rps13	3.04456e-09	-0.252526	0.301	0.412	7.74262e-05
Rpl29	4.47377e-09	-0.253245	0.278	0.38	0.000113773
Rpl18	4.52571e-09	-0.263407	0.37	0.472	0.000115093
Rpl21	5.80376e-09	-0.269378	0.384	0.483	0.000147595
Mpc1	5.94881e-09	-0.258832	0.437	0.528	0.000151284
Luzp2	9.67622e-09	0.290542	0.279	0.193	0.000246076
Rpl18a	1.0863e-08	-0.250004	0.365	0.463	0.000276256
Fabp5	1.29274e-08	-0.260605	0.308	0.405	0.000328758
Ctnna2	2.69815e-08	0.252394	0.997	0.998	0.000686167
Atp5g1	4.12811e-08	-0.275246	0.303	0.388	0.00104982
Rpl36	6.63132e-08	-0.26612	0.247	0.332	0.00168641
Prdx1	7.78481e-08	-0.27684	0.605	0.663	0.00197975
Tmem163	1.70318e-07	0.263384	0.322	0.243	0.00433135
Tubb3	3.97696e-07	-0.251181	0.179	0.256	0.0101138
9330111N05Rik	6.12938e-05	0.312022	0.423	0.354	1

## Sheet: thiamine_cluster2R61vvsNTv
Column1	p_val	avg_log2FC	pct.1	pct.2	p_val_adj
Penk	0	-1.94821	0.827	0.985	0
Rgs9	0	-1.2043	0.902	0.982	0
Meg3	0	0.709926	1	1	0
Phactr1	0	-0.668375	1	1	0
Pde10a	0	-1.23273	0.998	0.997	0
Malat1	0	-0.873192	1	1	0
Pcp4	1.48566e-294	-1.32358	0.647	0.944	3.77818e-290
Adcy5	6.73398e-286	-0.95093	0.828	0.975	1.71252e-281
Celf2	2.97201e-280	-0.431828	1	1	7.55813e-276
Robo1	4.41067e-248	0.769553	1	0.984	1.12168e-243
Frmd4a	5.38364e-245	0.898297	0.978	0.889	1.36911e-240
Sfmbt2	5.63013e-242	0.827972	0.561	0.065	1.4318e-237
Magi2	2.32526e-224	0.611497	1	0.997	5.91337e-220
Scn4b	6.40327e-221	-0.853313	0.215	0.677	1.62841e-216
Atp2b1	3.26189e-217	-0.631451	0.996	1	8.29532e-213
Mgat4c	4.04859e-217	0.879589	0.983	0.95	1.0296e-212
Dclk1	4.8701e-215	-0.750677	0.918	0.99	1.23851e-210
Hpca	4.03483e-214	-0.892788	0.585	0.887	1.0261e-209
Arpp19	6.33739e-212	-0.891242	0.589	0.885	1.61166e-207
Rian	6.25186e-208	0.664895	0.992	0.968	1.58991e-203
Ddx5	1.58365e-205	0.594915	1	0.996	4.02737e-201
Cmss1	1.29602e-203	-0.658386	0.987	0.998	3.2959e-199
Lsamp	2.34804e-202	0.641506	1	1	5.9713e-198
Nrxn1	2.00304e-200	0.638193	0.998	0.988	5.09393e-196
Ckb	8.25286e-196	-0.809084	0.923	0.988	2.09879e-191
Ogt	2.30196e-195	0.680257	0.982	0.884	5.85411e-191
Adora2a	3.94379e-194	-0.796785	0.6	0.882	1.00294e-189
Ppp1r1b	4.91874e-192	-0.80075	0.516	0.85	1.25089e-187
Osbpl8	2.1741e-190	-0.751327	0.93	0.985	5.52895e-186
Camk4	5.96495e-188	-0.716497	0.948	0.989	1.51695e-183
Inf2	3.93058e-187	-0.794385	0.586	0.882	9.99587e-183
Mhrt	8.17907e-183	-0.890185	0.226	0.636	2.08002e-178
Cacnb2	5.60584e-179	-0.744101	1	1	1.42562e-174
Arpp21	8.06604e-171	-0.481677	0.999	1	2.05127e-166
Itpr1	1.07683e-167	-0.615992	0.941	0.993	2.73849e-163
Rap1gap	1.38226e-163	-0.743498	0.673	0.883	3.51522e-159
Kcnq1ot1	3.98421e-162	0.677329	0.968	0.856	1.01322e-157
Cdh18	5.25454e-160	1.03688	0.9	0.628	1.33628e-155
Gria1	1.78809e-159	0.49267	1	0.997	4.54729e-155
Homer1	1.83451e-158	-0.881051	0.771	0.93	4.66533e-154
Ppp3ca	1.6563e-157	-0.430664	1	1	4.21214e-153
Ptpn5	4.1723e-151	-0.63925	0.781	0.951	1.06106e-146
Gm10754	4.61049e-151	-0.862524	0.795	0.919	1.17249e-146
Nrgn	5.58307e-151	-0.94514	0.841	0.956	1.41983e-146
Gm19410	3.83192e-150	-0.804962	0.225	0.596	9.74496e-146
Ror1	6.86711e-149	-0.72813	0.119	0.489	1.74637e-144
Sec14l1	3.34256e-146	-0.660795	0.347	0.707	8.50047e-142
Pde1b	3.06226e-145	-0.623685	0.732	0.913	7.78763e-141
Gabrd	5.71999e-145	-0.64313	0.393	0.749	1.45465e-140
Agbl4	1.45603e-144	0.768558	0.917	0.69	3.70284e-140
Gm10848	8.13608e-144	-0.761844	0.572	0.831	2.06909e-139
Pcdh9	9.61698e-143	0.731586	0.989	0.934	2.44569e-138
Lpp	1.23473e-142	0.658679	0.651	0.266	3.14004e-138
Camkv	1.0053e-137	-0.613295	0.78	0.93	2.55658e-133
Gsg1l	1.30401e-136	-0.651905	0.389	0.74	3.31623e-132
Cdr1os	3.42944e-136	0.508337	0.995	0.988	8.72141e-132
Ralyl	4.41074e-136	0.696709	0.918	0.614	1.1217e-131
Strn	4.80285e-136	-0.70842	0.774	0.917	1.22141e-131
Scaper	2.02102e-134	0.623361	0.909	0.701	5.13966e-130
Ppp1r1a	1.54873e-132	-0.639374	0.425	0.744	3.93857e-128
Pde7b	2.06117e-132	-0.509712	0.993	0.998	5.24177e-128
Scn9a	8.21531e-132	0.617516	0.601	0.226	2.08924e-127
Ppfia2	1.49856e-130	0.55892	0.983	0.904	3.81098e-126
Itga9	2.56229e-130	-0.638855	0.149	0.494	6.51617e-126
Prkcb	5.12175e-130	-0.554801	0.959	0.989	1.30251e-125
Rhobtb2	7.63609e-130	-0.668629	0.483	0.779	1.94193e-125
Drd2	6.33092e-129	-0.628841	0.83	0.931	1.61002e-124
Lrrk2	4.01705e-128	-0.666559	0.585	0.839	1.02158e-123
Gm15810	5.91094e-127	-0.659649	0.702	0.887	1.50321e-122
Grip1	1.17416e-124	0.653114	0.962	0.832	2.98601e-120
Spock3	3.90186e-124	-0.518971	0.995	0.994	9.92281e-120
Neto2	2.55527e-123	-0.698668	0.586	0.829	6.4983e-119
Wipf3	2.72436e-123	-0.726723	0.537	0.797	6.92832e-119
Anks1b	1.71465e-122	-0.413709	1	1	4.36053e-118
Traip	3.05696e-121	-0.603923	0.264	0.602	7.77416e-117
Ank2	3.41763e-121	0.481384	0.999	0.991	8.69139e-117
Lhfpl3	6.20026e-121	0.644032	0.944	0.808	1.57679e-116
Gm13269	9.87204e-121	-0.696183	0.622	0.847	2.51056e-116
Gm32647	3.76047e-120	1.13738	0.615	0.276	9.56324e-116
Calm2	5.4754e-120	-0.535356	0.956	0.994	1.39245e-115
Baiap2	9.61926e-120	-0.527394	0.865	0.967	2.44627e-115
Ctnna2	6.16067e-116	0.401324	1	1	1.56672e-111
Dok6	9.07884e-116	0.524335	0.978	0.908	2.30884e-111
Gm20754	2.74477e-114	0.782133	0.765	0.487	6.98022e-110
Lmo2	1.60833e-112	-0.477919	0.123	0.436	4.09014e-108
Gpm6b	1.75396e-112	-0.546153	0.885	0.973	4.46049e-108
Tmem178b	4.97966e-112	0.521072	0.981	0.912	1.26638e-107
Fgf12	2.56736e-110	0.454386	0.997	0.988	6.52906e-106
Camk2b	2.7566e-110	-0.543347	0.794	0.911	7.01032e-106
Ctxn1	1.79947e-109	-0.530696	0.321	0.645	4.57624e-105
Ccser1	5.46251e-108	0.455867	1	0.991	1.38917e-103
Atad2b	9.7929e-108	0.566294	0.728	0.436	2.49043e-103
Kcnk2	9.13793e-107	-0.679518	0.837	0.924	2.32387e-102
Rbm39	9.7491e-107	0.399152	1	0.992	2.47929e-102
Lrfn5	3.87426e-106	0.4902	0.993	0.979	9.85264e-102
Dmd	3.38368e-105	0.476287	0.998	0.967	8.60503e-101
A230006K03Rik	1.74345e-104	0.607146	0.921	0.822	4.43376e-100
Slc6a6	1.78295e-104	-0.539812	0.782	0.92	4.53421e-100
Rasgrp2	2.00643e-104	-0.566995	0.393	0.688	5.10254e-100
Snhg14	2.03926e-103	0.405933	0.997	0.989	5.18604e-99
Tesc	3.00901e-103	-0.548329	0.431	0.727	7.65222e-99
Cnr1	3.20529e-103	-1.02439	0.304	0.577	8.15137e-99
4930402H24Rik	1.33932e-101	0.511522	0.936	0.812	3.40602e-97
Ube3a	3.36007e-101	0.403746	0.998	0.996	8.545e-97
Kcnh4	3.19585e-100	-0.470762	0.179	0.488	8.12737e-96
Cyld	1.70829e-99	-0.496732	0.832	0.942	4.34435e-95
Ldlrad4	2.05851e-98	-0.710456	0.76	0.89	5.235e-94
1700016P03Rik	3.00006e-98	-0.949176	0.079	0.34	7.62946e-94
Pmepa1	1.45074e-97	-0.555372	0.391	0.675	3.68939e-93
Gpr6	7.0248e-97	-0.520456	0.325	0.63	1.78648e-92
Ppp2r2a	6.10592e-96	-0.538517	0.726	0.882	1.5528e-91
Chn1	1.23807e-95	-0.474629	0.895	0.962	3.14854e-91
Rsrp1	2.03512e-95	0.481191	0.969	0.893	5.17551e-91
AI480526	3.20999e-95	0.473565	0.554	0.249	8.16331e-91
Exoc4	1.06199e-94	0.446283	0.977	0.914	2.70074e-90
Trank1	1.70242e-94	-0.465164	0.883	0.967	4.32943e-90
Tra2a	2.43592e-94	0.467022	0.94	0.83	6.19478e-90
Sgcz	6.35507e-94	0.325244	1	0.997	1.61616e-89
Actn2	6.66794e-94	-0.583793	0.658	0.846	1.69572e-89
Cdh13	7.76601e-94	-0.725301	0.329	0.616	1.97497e-89
Ppp4r4	1.15406e-93	-0.542223	0.527	0.774	2.93489e-89
Fbxl16	1.13618e-92	-0.503482	0.517	0.765	2.88941e-88
Zswim6	1.22636e-92	-0.548711	0.924	0.956	3.11876e-88
2010300C02Rik	1.67882e-92	-0.463947	0.803	0.927	4.26941e-88
Gpr88	1.97772e-92	-0.564742	0.692	0.859	5.02954e-88
Prima1	5.92928e-92	-0.426573	0.083	0.339	1.50787e-87
Apc	9.15358e-92	0.478846	0.938	0.826	2.32785e-87
Hrh3	1.12305e-90	-0.361097	0.054	0.293	2.85603e-86
Enah	4.30714e-90	0.512048	0.786	0.513	1.09535e-85
A330015K06Rik	4.56633e-90	-0.544228	0.886	0.958	1.16126e-85
Guf1	2.25431e-89	0.491226	0.626	0.347	5.73294e-85
Nrxn3	4.02631e-89	0.256914	1	1	1.02393e-84
Dbp	4.18881e-89	-0.472211	0.286	0.577	1.06526e-84
Luc7l2	1.34851e-88	0.388947	0.997	0.99	3.42939e-84
Npas2	1.44713e-88	-0.549007	0.705	0.888	3.68019e-84
Rgs11	1.89832e-87	-0.423982	0.171	0.454	4.82762e-83
Arhgap10	2.39559e-87	-0.499834	0.803	0.928	6.09221e-83
Zbtb20	3.44271e-87	0.563917	0.979	0.886	8.75516e-83
Nkain2	9.41129e-87	0.348933	1	1	2.39339e-82
Sh2d5	2.02974e-86	-0.470825	0.354	0.634	5.16183e-82
Gm49906	3.42191e-86	-0.660947	0.374	0.659	8.70226e-82
Mapk4	3.74096e-86	-0.567482	0.677	0.85	9.51364e-82
Xkr4	7.28521e-86	0.440669	0.986	0.963	1.8527e-81
Cep164	1.14097e-85	0.464827	0.662	0.382	2.90159e-81
Gpr158	1.45153e-85	-0.426371	0.985	0.991	3.6914e-81
Prkd1	1.15771e-84	-0.650383	0.719	0.868	2.94416e-80
Rims2	2.5699e-84	0.328762	1	0.998	6.53551e-80
Col11a1	2.78778e-84	0.424121	0.3	0.059	7.0896e-80
Bicd1	3.23304e-84	0.501768	0.88	0.732	8.22194e-80
Grm5	7.3154e-84	-0.26846	1	1	1.86038e-79
Cacna1e	1.89924e-83	-0.389418	0.99	0.997	4.82997e-79
Htr4	9.78009e-83	-0.701258	0.262	0.541	2.48717e-78
Camk2n1	1.11217e-82	-0.513804	0.467	0.717	2.82836e-78
Ccnl2	4.90256e-81	0.4832	0.827	0.64	1.24677e-76
Lin7b	4.38818e-80	-0.427127	0.274	0.553	1.11596e-75
Kctd17	8.28934e-80	-0.569087	0.488	0.711	2.10806e-75
Ier5l	3.51521e-79	-0.373823	0.13	0.386	8.93954e-75
Epyc	3.53884e-79	-0.346351	0.06	0.281	8.99963e-75
Gm47283	3.80689e-79	0.572775	0.889	0.737	9.6813e-75
Egr1	7.03349e-79	-0.560994	0.211	0.481	1.78869e-74
Itpka	8.38088e-79	-0.46304	0.342	0.61	2.13134e-74
Tbc1d8	8.55629e-79	-0.490202	0.601	0.79	2.17595e-74
Rasd2	1.45577e-78	-0.471704	0.33	0.596	3.70218e-74
Ngef	2.81181e-78	-0.466543	0.679	0.839	7.15071e-74
Gprin3	3.34464e-78	-0.556302	0.817	0.889	8.50575e-74
Ivns1abp	4.67769e-78	-0.552645	0.632	0.808	1.18958e-73
Syndig1l	4.73007e-78	-0.448327	0.319	0.591	1.20291e-73
Clasp2	6.46394e-78	0.460009	0.877	0.72	1.64385e-73
Gm26871	6.76638e-78	0.448994	0.976	0.927	1.72076e-73
Gmds	1.70214e-77	0.504055	0.794	0.587	4.3287e-73
Baz2b	3.03993e-77	0.482113	0.855	0.679	7.73085e-73
Exoc6b	3.58343e-77	0.450693	0.879	0.721	9.11303e-73
Kcnip3	4.22682e-77	-0.526431	0.496	0.722	1.07492e-72
Gpr83	4.7561e-77	-0.381089	0.106	0.346	1.20952e-72
Galnt18	5.69094e-77	-0.512615	0.317	0.589	1.44726e-72
Taf15	7.14048e-77	0.451331	0.788	0.578	1.8159e-72
Cacna2d3	7.28908e-77	-0.315463	0.977	0.973	1.85369e-72
Snhg11	9.80894e-77	0.356198	1	0.998	2.49451e-72
Luc7l3	1.26039e-76	0.450157	0.91	0.795	3.20529e-72
Gnb5	1.26836e-76	-0.457224	0.664	0.845	3.22558e-72
Fbxl17	1.39074e-76	0.430533	0.954	0.9	3.5368e-72
Grid2	1.82001e-76	0.333036	0.993	0.99	4.62847e-72
Cx3cl1	2.20581e-76	-0.471143	0.618	0.802	5.60959e-72
5330417C22Rik	2.31467e-76	-0.527005	0.575	0.78	5.88645e-72
Hras	2.4507e-76	-0.446114	0.341	0.615	6.23237e-72
Cdh12	3.13759e-76	0.624203	0.695	0.444	7.9792e-72
Klf12	3.58454e-76	0.500881	0.84	0.665	9.11585e-72
Rbm28	3.87844e-76	0.466079	0.833	0.65	9.86327e-72
Tnrc6b	8.61686e-76	0.434747	0.928	0.814	2.19135e-71
Junb	1.03714e-75	-0.908294	0.278	0.54	2.63756e-71
Gm50024	1.63411e-75	-0.421981	0.215	0.483	4.15571e-71
Rtn3	1.81885e-75	0.399765	0.959	0.909	4.62552e-71
Rgs4	2.67385e-75	-0.463201	0.233	0.496	6.79988e-71
Car11	3.54012e-75	-0.447787	0.576	0.783	9.00289e-71
Dusp14	5.28311e-75	-0.510993	0.125	0.365	1.34355e-70
Adamts6	5.42106e-75	0.414529	0.37	0.12	1.37863e-70
Sox8	1.77617e-74	-0.421244	0.217	0.481	4.51697e-70
Syt2	1.34389e-73	-0.311996	0.056	0.264	3.41766e-69
Srrt	2.76015e-73	-0.423308	0.375	0.632	7.01935e-69
Gpc6	2.8429e-73	0.574708	0.81	0.52	7.22978e-69
Per1	4.39843e-73	-0.443262	0.16	0.407	1.11856e-68
Cdc42bpa	5.65566e-73	0.408653	0.951	0.882	1.43829e-68
Ppp1r16b	8.22531e-73	-0.482596	0.469	0.696	2.09178e-68
Tcf4	2.21061e-72	0.474846	0.572	0.298	5.62181e-68
Pcsk2	2.79398e-72	-0.396759	0.97	0.978	7.10536e-68
Sntg1	2.96313e-72	0.351301	0.997	0.994	7.53553e-68
Cttnbp2	3.55202e-72	-0.359455	0.986	0.992	9.03315e-68
Plk2	5.25674e-72	-0.547008	0.51	0.728	1.33684e-67
Cacna2d1	5.6784e-72	0.387547	0.981	0.953	1.44407e-67
Calm1	1.36224e-71	-0.424446	0.911	0.964	3.46432e-67
Elmod1	3.79892e-71	-0.366631	0.969	0.992	9.66104e-67
Zfyve28	4.36384e-71	-0.441472	0.589	0.788	1.10977e-66
Ppp2r3a	1.62862e-70	0.483272	0.656	0.405	4.14174e-66
Rgs7bp	2.81385e-70	-0.445003	0.952	0.978	7.15591e-66
4933424G05Rik	4.28101e-70	-0.4547	0.432	0.672	1.0887e-65
Gm47423	7.23851e-70	-0.714598	0.2	0.435	1.84083e-65
Gm28494	1.33517e-69	-0.510462	0.159	0.396	3.39548e-65
Rgs20	2.48027e-69	-0.537097	0.679	0.84	6.30758e-65
Tmem117	4.30945e-69	0.477525	0.69	0.46	1.09594e-64
Rem2	4.55386e-69	-0.342139	0.12	0.352	1.15809e-64
Kcnip2	8.36796e-69	-0.433842	0.567	0.769	2.12806e-64
Smpd3	9.5399e-69	-0.4359	0.794	0.914	2.42609e-64
Lrrc10b	4.95645e-68	-0.38237	0.187	0.433	1.26047e-63
Insyn2b	5.74993e-68	0.321731	0.255	0.053	1.46226e-63
Pde2a	1.18533e-67	-0.428422	0.851	0.932	3.01442e-63
Rit2	1.36978e-67	0.427432	0.933	0.832	3.48349e-63
Zranb2	1.43648e-67	0.361906	0.979	0.945	3.65311e-63
Cdk14	1.90131e-67	0.4799	0.588	0.337	4.83523e-63
Chd9	5.10697e-67	0.410374	0.92	0.829	1.29875e-62
Tpm1	6.95045e-67	-0.536878	0.633	0.792	1.76757e-62
Plcb1	7.12953e-67	-0.330016	0.998	1	1.81311e-62
Cacng4	7.14597e-67	-0.427793	0.392	0.639	1.81729e-62
Sobp	7.92073e-67	0.446669	0.438	0.191	2.01432e-62
Ppp1ca	1.44381e-66	-0.396752	0.309	0.558	3.67176e-62
Sorcs2	3.82474e-66	-0.517205	0.567	0.758	9.72671e-62
1700003D09Rik	4.57626e-66	-0.428272	0.333	0.58	1.16379e-61
Fmnl2	5.9896e-66	0.408954	0.365	0.129	1.52322e-61
Pcp4l1	6.61974e-66	-0.441826	0.41	0.646	1.68347e-61
Nsun7	8.89736e-66	0.40461	0.556	0.298	2.26269e-61
Mirg	9.88813e-66	0.434829	0.759	0.551	2.51465e-61
Gm17231	9.97821e-66	-0.447276	0.329	0.575	2.53756e-61
Cntn5	1.9353e-65	-0.657426	0.989	0.983	4.92166e-61
Gpatch8	2.47857e-65	0.352748	0.989	0.967	6.30325e-61
Nr3c2	2.69327e-65	0.446912	0.916	0.815	6.84925e-61
Synpo2	5.11747e-65	-0.428265	0.212	0.464	1.30143e-60
St7	5.59358e-65	0.423627	0.734	0.526	1.4225e-60
Npas3	6.87326e-65	0.47883	0.338	0.113	1.74794e-60
Gpm6a	7.81912e-65	0.384843	0.979	0.935	1.98848e-60
Gli3	9.90536e-65	-0.515032	0.268	0.513	2.51903e-60
Fam155a	1.04612e-64	0.571738	0.938	0.863	2.66038e-60
Tiparp	1.20731e-64	-0.588817	0.13	0.347	3.07031e-60
Csmd2	1.80197e-64	0.438047	0.741	0.531	4.58259e-60
Slc4a4	1.97717e-64	-0.422398	0.939	0.966	5.02815e-60
Car12	2.32863e-64	-0.435587	0.204	0.445	5.92194e-60
Dennd1a	2.39859e-64	0.373683	0.965	0.91	6.09986e-60
Elavl2	2.58013e-64	0.345379	0.287	0.078	6.56152e-60
Etv5	5.07815e-64	-0.359232	0.134	0.361	1.29143e-59
Camkk2	1.53473e-63	-0.440236	0.565	0.764	3.90296e-59
Gng7	2.1873e-63	-0.384364	0.878	0.949	5.56251e-59
Ablim1	2.24221e-63	0.413068	0.546	0.29	5.70217e-59
Prickle2	2.25174e-63	0.457196	0.864	0.716	5.72639e-59
Ryr1	4.74141e-63	-0.370285	0.17	0.406	1.20579e-58
2210408I21Rik	9.39473e-63	0.485864	0.756	0.55	2.38917e-58
Slc4a10	1.35763e-62	0.398386	0.907	0.788	3.45259e-58
Ccdc88a	1.47874e-62	0.422853	0.865	0.73	3.76058e-58
Rims1	1.83611e-62	0.332779	0.992	0.974	4.66941e-58
Ptms	2.17147e-62	-0.410647	0.524	0.737	5.52228e-58
Camk1d	2.3883e-62	-0.355699	0.935	0.984	6.07369e-58
Upp2	3.33983e-62	0.474589	0.841	0.683	8.49353e-58
Ap1s1	4.00715e-62	-0.393163	0.366	0.605	1.01906e-57
Mbd5	4.22067e-62	0.343126	0.985	0.967	1.07336e-57
Dgkb	6.93469e-62	-0.269922	0.999	0.998	1.76356e-57
Pnn	7.28264e-62	0.410729	0.85	0.72	1.85205e-57
Srsf11	7.32131e-62	0.362459	0.966	0.924	1.86188e-57
Macrod2	1.25213e-61	0.277985	1	0.999	3.1843e-57
Nav3	1.317e-61	0.412035	0.966	0.895	3.34925e-57
Olfm3	3.82408e-61	0.478661	0.669	0.418	9.72501e-57
A330102I10Rik	4.1348e-61	0.473527	0.625	0.404	1.05152e-56
Eml6	4.65473e-61	0.406256	0.92	0.823	1.18374e-56
D7Ertd443e	7.03224e-61	-0.317877	0.067	0.256	1.78837e-56
Dpy19l3	1.69793e-60	-0.416016	0.257	0.492	4.31801e-56
Dpyd	2.59153e-60	0.456794	0.311	0.102	6.59053e-56
Inka2	2.66225e-60	-0.338216	0.197	0.432	6.77036e-56
Dync1i1	3.7815e-60	0.429069	0.852	0.698	9.61672e-56
Gnaq	3.96223e-60	0.398704	0.829	0.676	1.00764e-55
Gnas	7.22849e-60	0.387483	0.643	0.4	1.83828e-55
Nrg3	1.1028e-59	0.520349	0.79	0.568	2.80452e-55
9630028H03Rik	1.85912e-59	-0.503027	0.752	0.864	4.72794e-55
Ccdc88c	1.92747e-59	-0.426257	0.386	0.613	4.90176e-55
Atf6	2.20427e-59	-0.433935	0.589	0.755	5.60568e-55
Chchd10	3.14971e-59	-0.469644	0.621	0.802	8.01003e-55
Dnajc6	5.91932e-59	0.403043	0.823	0.641	1.50534e-54
Stk32a	9.96016e-59	-0.474612	0.554	0.735	2.53297e-54
Gpr52	1.36631e-58	-0.283717	0.082	0.275	3.47467e-54
Hcn1	1.37426e-58	0.484402	0.666	0.429	3.49487e-54
Pdp1	2.27804e-58	-0.424641	0.296	0.527	5.79329e-54
Gm28905	2.43725e-58	-0.545969	0.605	0.777	6.19818e-54
Usp34	3.05434e-58	0.361994	0.944	0.882	7.76749e-54
B3gnt2	3.80231e-58	-0.416324	0.436	0.647	9.66965e-54
AI593442	8.26423e-58	-0.385189	0.345	0.578	2.10168e-53
Setbp1	1.20689e-57	0.42985	0.866	0.751	3.06923e-53
P4ha1	1.83685e-57	-0.479458	0.497	0.696	4.67129e-53
Pak7	2.14735e-57	0.424556	0.722	0.518	5.46093e-53
Slc25a25	2.21037e-57	-0.412769	0.261	0.484	5.6212e-53
Fgd4	3.02315e-57	0.359336	0.349	0.133	7.68817e-53
Mtcl1	3.18354e-57	-0.435417	0.711	0.84	8.09606e-53
Gnal	3.37272e-57	-0.286652	0.992	0.998	8.57717e-53
Jcad	6.49475e-57	-0.39591	0.401	0.624	1.65168e-52
St8sia3	1.13767e-56	-0.41502	0.576	0.752	2.8932e-52
D030068K23Rik	1.1412e-56	0.451029	0.614	0.392	2.90219e-52
Ptchd4	1.22709e-56	0.441613	0.568	0.314	3.1206e-52
Ccdc85a	1.88501e-56	0.469507	0.543	0.318	4.79376e-52
Ehbp1	2.32909e-56	0.386264	0.848	0.686	5.92311e-52
Smc2	2.34022e-56	0.347454	0.34	0.129	5.95141e-52
Nr4a1	2.47524e-56	-0.565948	0.128	0.324	6.29479e-52
Htr2c	4.10222e-56	0.536071	0.931	0.872	1.04324e-51
Rerg	6.68156e-56	-0.428363	0.359	0.594	1.69919e-51
Sntb2	1.24528e-55	-0.435963	0.465	0.656	3.16687e-51
Cplane1	1.25243e-55	0.366968	0.9	0.788	3.18507e-51
Spry2	1.45204e-55	-0.376664	0.299	0.528	3.69267e-51
Stk3	1.47192e-55	0.352763	0.372	0.154	3.74323e-51
Pafah1b1	1.62495e-55	0.367902	0.922	0.845	4.1324e-51
Slc24a2	2.3965e-55	-0.390457	0.943	0.974	6.09455e-51
Nr6a1	2.95674e-55	0.415965	0.762	0.585	7.51929e-51
Stmn2	4.94889e-55	0.359292	0.38	0.162	1.25855e-50
U2surp	7.84297e-55	0.363843	0.908	0.797	1.99454e-50
Fam172a	1.25902e-54	0.384471	0.876	0.757	3.20182e-50
Kcnab1	2.07471e-54	-0.316564	0.99	0.992	5.2762e-50
Ppp1r2	2.14237e-54	-0.456355	0.58	0.749	5.44826e-50
Lynx1	3.08258e-54	-0.351241	0.243	0.466	7.83931e-50
C130073E24Rik	4.47767e-54	0.516839	0.484	0.24	1.13872e-49
Polr2a	6.09589e-54	0.365009	0.439	0.218	1.55025e-49
Pdzd2	1.06186e-53	-0.524823	0.688	0.816	2.70043e-49
Pid1	1.47864e-53	0.435795	0.569	0.344	3.76033e-49
Coch	2.43179e-53	-0.320447	0.126	0.324	6.18429e-49
Rgs2	3.13322e-53	-0.490718	0.254	0.467	7.96809e-49
Sgk1	3.98609e-53	-0.494514	0.694	0.815	1.0137e-48
Ncor1	4.71472e-53	0.345142	0.912	0.833	1.199e-48
Zfp207	5.32679e-53	0.363197	0.808	0.65	1.35466e-48
Snrnp70	6.54837e-53	0.300699	0.993	0.98	1.66532e-48
Cap1	2.14866e-52	-0.399146	0.467	0.665	5.46425e-48
Tmod1	2.68558e-52	-0.359198	0.286	0.506	6.82971e-48
Cdh10	2.74871e-52	0.442029	0.76	0.547	6.99026e-48
Rpl26	3.50912e-52	-0.406227	0.472	0.665	8.92405e-48
Id4	6.53057e-52	-0.38686	0.262	0.477	1.66079e-47
Dynll1	6.79897e-52	-0.365388	0.494	0.706	1.72905e-47
Lzts3	1.10673e-51	-0.366594	0.474	0.678	2.81453e-47
Spred2	1.35118e-51	-0.38503	0.459	0.671	3.43617e-47
Sema6d	2.56024e-51	0.425556	0.699	0.478	6.51095e-47
Ryr3	4.58983e-51	-0.287364	0.997	0.999	1.16724e-46
Ralgapa1	4.68003e-51	0.333291	0.947	0.877	1.19018e-46
B830012L14Rik	5.58306e-51	0.40823	0.752	0.591	1.41983e-46
Crocc	5.97366e-51	-0.350935	0.272	0.49	1.51916e-46
Rock1	6.67693e-51	0.367072	0.866	0.743	1.69801e-46
Strbp	7.74636e-51	0.291353	0.995	0.987	1.96998e-46
A230057D06Rik	9.03214e-51	0.352485	0.962	0.919	2.29696e-46
Arel1	1.31489e-50	-0.337199	0.481	0.686	3.34389e-46
Epha5	2.27336e-50	0.480843	0.869	0.72	5.78139e-46
Runx2	2.37013e-50	0.385499	0.529	0.306	6.02747e-46
Arc	2.53617e-50	-0.45333	0.082	0.254	6.44973e-46
Wsb1	2.8591e-50	0.359891	0.551	0.337	7.27097e-46
Egr3	3.11272e-50	-0.382319	0.112	0.298	7.91595e-46
Npas4	6.60211e-50	-0.469922	0.097	0.275	1.67898e-45
Lrtm1	7.98927e-50	-0.397032	0.591	0.752	2.03175e-45
Zmym4	1.42194e-49	0.366241	0.828	0.713	3.61613e-45
Mapk10	1.42684e-49	0.325462	0.971	0.946	3.6286e-45
Ntrk3	1.79519e-49	-0.329298	0.958	0.979	4.56534e-45
Pla2g3	2.47773e-49	-0.30812	0.167	0.365	6.30113e-45
Sez6	5.22915e-49	-0.373983	0.708	0.831	1.32982e-44
Foxn3	5.48601e-49	0.369407	0.455	0.24	1.39515e-44
Lrrtm4	5.9531e-49	0.293364	1	0.999	1.51393e-44
Atp1a1	6.16123e-49	-0.356116	0.405	0.615	1.56686e-44
4930509J09Rik	6.77427e-49	0.394576	0.505	0.286	1.72276e-44
Egr4	7.19267e-49	-0.592768	0.131	0.316	1.82917e-44
Zmat4	8.6603e-49	-0.388031	0.246	0.454	2.2024e-44
Cacna1a	1.08012e-48	0.308257	0.993	0.977	2.74684e-44
Ramp1	1.16704e-48	-0.36076	0.397	0.597	2.96789e-44
Lin28b	1.33061e-48	0.405879	0.694	0.512	3.38387e-44
Cdc42ep3	2.97465e-48	-0.370375	0.363	0.573	7.56484e-44
Cog5	3.02617e-48	0.36737	0.763	0.594	7.69586e-44
Gtdc1	3.20742e-48	0.395262	0.648	0.451	8.1568e-44
Sh3rf2	4.2808e-48	-0.461103	0.524	0.687	1.08865e-43
Gm15813	5.88566e-48	-0.334376	0.296	0.508	1.49678e-43
Rsrc1	6.84179e-48	0.375817	0.753	0.589	1.73993e-43
Abca8b	1.04655e-47	0.352042	0.484	0.273	2.66148e-43
Ptk2b	1.15458e-47	-0.342256	0.727	0.854	2.93621e-43
Sgip1	1.37942e-47	0.286487	0.993	0.984	3.50801e-43
Tmem158	1.5204e-47	-0.364297	0.663	0.81	3.86653e-43
Atp2b2	1.65995e-47	-0.28007	0.959	0.986	4.22141e-43
Mycbp2	1.94182e-47	0.266846	0.997	0.99	4.93825e-43
Arid3b	2.02682e-47	-0.308504	0.185	0.388	5.15439e-43
Nrcam	2.76007e-47	0.344427	0.935	0.869	7.01913e-43
Gm48677	3.07006e-47	-0.345834	0.362	0.569	7.80748e-43
Chuk	3.73237e-47	0.359195	0.712	0.543	9.4918e-43
Prrc2c	5.60891e-47	0.323474	0.901	0.826	1.4264e-42
Klhl7	7.35854e-47	0.350452	0.811	0.671	1.87135e-42
Onecut2	7.66655e-47	0.377229	0.533	0.314	1.94968e-42
Brinp3	8.58078e-47	0.418247	0.815	0.618	2.18218e-42
Slc8a2	8.9203e-47	-0.310362	0.274	0.486	2.26852e-42
Strn3	1.29786e-46	0.334244	0.938	0.877	3.30058e-42
Ndst3	1.38001e-46	0.370234	0.494	0.274	3.5095e-42
Atxn1	1.48523e-46	-0.276721	0.993	0.996	3.7771e-42
Slc1a1	2.01631e-46	-0.3423	0.478	0.67	5.12767e-42
Fmn2	2.4265e-46	0.364719	0.837	0.712	6.17084e-42
Oprd1	3.31336e-46	-0.320642	0.264	0.474	8.42621e-42
Slc44a5	4.39819e-46	0.334957	0.385	0.184	1.1185e-41
Dusp3	4.89682e-46	-0.313468	0.21	0.411	1.24531e-41
Syp	5.13863e-46	0.349346	0.601	0.395	1.3068e-41
Dlc1	7.01888e-46	0.389827	0.464	0.26	1.78497e-41
Stxbp6	9.96181e-46	0.404408	0.408	0.205	2.53339e-41
Sbf2	1.48653e-45	0.333305	0.902	0.823	3.78038e-41
Robo2	1.63583e-45	0.29266	0.994	0.994	4.16007e-41
Efnb3	1.68382e-45	-0.285563	0.174	0.37	4.28212e-41
Spred1	1.70081e-45	-0.35276	0.67	0.815	4.32532e-41
Kansl1	2.30118e-45	0.33115	0.942	0.891	5.85212e-41
Ube2e2	4.12863e-45	0.329979	0.957	0.932	1.04995e-40
Trip12	4.2469e-45	0.350336	0.851	0.726	1.08003e-40
Lrrc4c	4.28501e-45	0.253619	1	0.998	1.08972e-40
A330076H08Rik	4.47406e-45	0.359087	0.809	0.66	1.1378e-40
Arhgap42	7.44534e-45	0.255974	0.29	0.109	1.89343e-40
Ccdc85b	8.22928e-45	-0.314351	0.234	0.435	2.09279e-40
Bcl11b	1.19187e-44	-0.344628	0.887	0.927	3.03105e-40
Pbx1	1.30178e-44	0.309133	0.973	0.943	3.31055e-40
Tmem191c	2.1131e-44	-0.352464	0.706	0.843	5.37383e-40
Zfhx4	2.20202e-44	0.34367	0.606	0.404	5.59997e-40
Ncam1	2.65533e-44	0.328115	0.945	0.884	6.75276e-40
Ccnd2	4.64129e-44	-0.477632	0.393	0.566	1.18033e-39
Mast3	5.72614e-44	-0.328781	0.408	0.603	1.45622e-39
Tenm3	6.88052e-44	0.517898	0.912	0.84	1.74979e-39
Epb41l4b	7.78716e-44	0.307938	0.355	0.163	1.98035e-39
Coq10b	8.82637e-44	-0.412572	0.296	0.483	2.24463e-39
Prelid3a	9.24456e-44	-0.324183	0.643	0.796	2.35098e-39
Ranbp17	1.0153e-43	0.378798	0.709	0.527	2.58202e-39
Frmd5	1.21794e-43	0.362002	0.883	0.786	3.09734e-39
Mlf2	1.23012e-43	-0.331149	0.41	0.603	3.12833e-39
Gm15680	1.37979e-43	-0.35796	0.206	0.399	3.50895e-39
Crip2	1.85018e-43	-0.277763	0.172	0.363	4.70518e-39
Parp8	2.9098e-43	0.323798	0.441	0.242	7.39992e-39
Gcnt2	3.21335e-43	-0.363078	0.476	0.663	8.17187e-39
Mrpl41	3.21808e-43	-0.324072	0.43	0.622	8.1839e-39
Sgk3	3.39982e-43	-0.353598	0.651	0.798	8.64609e-39
Ttyh1	5.20656e-43	-0.31823	0.658	0.801	1.32408e-38
Tenm1	5.56169e-43	0.297052	0.857	0.717	1.41439e-38
Tmsb4x	6.25791e-43	-0.365526	0.587	0.734	1.59145e-38
Hjurp	7.23953e-43	0.324107	0.524	0.329	1.84108e-38
A830036E02Rik	8.08798e-43	0.322145	0.601	0.378	2.05686e-38
Mlip	9.01652e-43	0.34427	0.448	0.248	2.29299e-38
Rasgef1a	1.70966e-42	-0.319143	0.724	0.853	4.34783e-38
Kctd1	5.01358e-42	-0.338415	0.742	0.854	1.275e-37
Ccdc58	6.09028e-42	0.355487	0.547	0.357	1.54882e-37
Grm1	7.83755e-42	-0.400747	0.853	0.9	1.99317e-37
Itga5	8.17005e-42	-0.28602	0.148	0.327	2.07773e-37
Pard3	1.11662e-41	-0.301944	0.935	0.974	2.83967e-37
Cntn1	1.14234e-41	0.311224	0.965	0.931	2.90509e-37
Frmd6	1.92439e-41	-0.304126	0.171	0.353	4.89391e-37
Fubp1	3.33442e-41	0.307258	0.92	0.85	8.47976e-37
Srgap3	3.4456e-41	0.335225	0.85	0.746	8.76251e-37
Zfp706	5.66181e-41	-0.306632	0.278	0.472	1.43986e-36
Mt1	5.67486e-41	-0.340191	0.263	0.456	1.44317e-36
Scg5	5.84445e-41	0.336498	0.917	0.857	1.4863e-36
Rnf112	6.52506e-41	-0.335839	0.482	0.665	1.65939e-36
AC149090.1	8.20352e-41	-0.309443	0.964	0.988	2.08624e-36
Fstl5	8.70282e-41	0.366817	0.452	0.254	2.21321e-36
Foxo1	9.14458e-41	-0.41079	0.494	0.66	2.32556e-36
Rarb	9.41967e-41	-0.271729	0.991	0.999	2.39552e-36
Pcca	1.17674e-40	0.324797	0.772	0.618	2.99256e-36
Khdrbs2	1.18695e-40	0.472321	0.687	0.489	3.01852e-36
Cpeb3	1.28703e-40	0.317732	0.89	0.785	3.27303e-36
Ambra1	1.60583e-40	0.319603	0.833	0.728	4.08377e-36
Gipc2	1.67712e-40	-0.342417	0.271	0.462	4.26508e-36
Trim9	3.49774e-40	-0.355075	0.759	0.854	8.8951e-36
Uty	3.83112e-40	0.345294	0.717	0.563	9.74292e-36
Rnf207	4.34709e-40	-0.303044	0.324	0.519	1.10551e-35
Fam126a	5.31588e-40	0.276633	0.253	0.094	1.35188e-35
Arhgap33	5.32279e-40	-0.288071	0.377	0.577	1.35364e-35
Mink1	7.45064e-40	-0.307464	0.659	0.789	1.89477e-35
Rnf144a	8.52747e-40	-0.272078	0.126	0.292	2.16862e-35
Slc25a13	8.83449e-40	0.29049	0.338	0.16	2.2467e-35
Hivep3	9.15656e-40	0.345655	0.729	0.585	2.3286e-35
Pnisr	9.76017e-40	0.25742	0.984	0.974	2.48211e-35
Fam184b	1.08742e-39	-0.322195	0.313	0.504	2.76541e-35
Jak2	1.19739e-39	-0.323254	0.426	0.609	3.04509e-35
Agk	1.53229e-39	0.31975	0.573	0.39	3.89676e-35
Cnksr2	1.66526e-39	-0.272096	0.977	0.991	4.23493e-35
Pdss2	1.95972e-39	0.337544	0.641	0.465	4.98377e-35
Prkdc	2.0655e-39	0.308856	0.561	0.368	5.25278e-35
Tfrc	2.10824e-39	0.307249	0.518	0.328	5.36147e-35
Psd	2.62668e-39	-0.274761	0.264	0.456	6.67991e-35
Magi1	3.16291e-39	0.342076	0.751	0.604	8.04361e-35
Ano4	3.84442e-39	0.335956	0.433	0.235	9.77674e-35
Gkap1	4.26773e-39	0.312735	0.358	0.178	1.08533e-34
2610037D02Rik	4.99492e-39	0.33705	0.62	0.447	1.27026e-34
Ikzf2	5.0865e-39	0.278682	0.265	0.104	1.29355e-34
Gm38413	7.1283e-39	-0.286137	0.353	0.55	1.8128e-34
Acat1	7.43081e-39	0.326985	0.674	0.517	1.88973e-34
Pcdh19	8.25118e-39	0.279282	0.289	0.121	2.09836e-34
Gm13629	9.65528e-39	0.264462	0.303	0.133	2.45543e-34
Ndfip2	1.64936e-38	-0.379715	0.633	0.746	4.19448e-34
Frmd4b	2.09751e-38	-0.41345	0.599	0.738	5.33419e-34
Ndrg4	2.72478e-38	-0.295187	0.904	0.944	6.92938e-34
Nagk	4.28989e-38	0.2859	0.419	0.235	1.09096e-33
Cdk17	4.6856e-38	-0.284937	0.881	0.949	1.1916e-33
Rbm6	5.41324e-38	0.310326	0.882	0.797	1.37664e-33
Wdfy3	5.90101e-38	0.324261	0.759	0.614	1.50069e-33
Phip	6.69645e-38	0.342113	0.785	0.654	1.70297e-33
Kdm4c	6.98567e-38	0.305545	0.798	0.671	1.77652e-33
Fer	1.53782e-37	0.318383	0.69	0.523	3.91084e-33
Gabra2	1.67717e-37	0.301855	0.96	0.929	4.26521e-33
Nnat	1.76547e-37	-0.840428	0.417	0.583	4.48977e-33
D430041D05Rik	1.81724e-37	-0.312091	0.807	0.889	4.62142e-33
L3mbtl3	2.11715e-37	0.326778	0.411	0.228	5.38412e-33
Cplx2	2.54609e-37	-0.304261	0.559	0.717	6.47495e-33
Gabrb1	2.82724e-37	0.364962	0.958	0.93	7.18995e-33
BC005561	4.34975e-37	0.313489	0.691	0.535	1.10619e-32
Neto1	4.95595e-37	-0.346461	0.952	0.974	1.26035e-32
Scn1a	6.30644e-37	0.295849	0.933	0.874	1.60379e-32
Gucy1a1	7.68479e-37	-0.337714	0.661	0.803	1.95432e-32
Supt20	8.13511e-37	0.305009	0.717	0.544	2.06884e-32
Gm13974	8.34697e-37	-0.401321	0.27	0.446	2.12272e-32
Deptor	1.48638e-36	-0.252554	0.105	0.256	3.78001e-32
Fnbp1l	1.99701e-36	-0.28018	0.889	0.943	5.0786e-32
Srsf7	2.20308e-36	-0.271101	0.919	0.966	5.60265e-32
Fndc3a	3.53586e-36	0.324036	0.697	0.544	8.99205e-32
Mast2	3.93033e-36	0.314398	0.536	0.357	9.99522e-32
Gm47591	4.82509e-36	-0.305906	0.36	0.533	1.22707e-31
Astn1	4.85307e-36	0.286613	0.921	0.844	1.23418e-31
Jazf1	5.04406e-36	0.32613	0.749	0.617	1.28275e-31
Ndufa4	5.22802e-36	-0.328335	0.602	0.752	1.32954e-31
Rnf150	5.29143e-36	-0.328452	0.875	0.931	1.34566e-31
Kif21a	7.3129e-36	0.294999	0.909	0.834	1.85974e-31
Wnk1	9.05663e-36	0.317308	0.788	0.675	2.30319e-31
Fkbp2	1.05284e-35	-0.279956	0.406	0.585	2.67748e-31
Kmt2c	1.06345e-35	0.309217	0.781	0.648	2.70447e-31
Sik3	1.95607e-35	-0.33731	0.868	0.922	4.97449e-31
Ankrd45	2.01437e-35	0.278336	0.521	0.335	5.12274e-31
Mprip	3.12541e-35	-0.284916	0.8	0.887	7.94822e-31
Cyp7b1	3.68201e-35	0.332702	0.561	0.381	9.36371e-31
Prpf4b	4.24236e-35	0.295054	0.947	0.922	1.07887e-30
Huwe1	4.92424e-35	0.301331	0.827	0.726	1.25228e-30
Gm2164	5.66013e-35	-0.372697	0.525	0.678	1.43943e-30
Dennd1b	6.19537e-35	0.313525	0.743	0.606	1.57554e-30
Sun2	6.29048e-35	-0.261615	0.212	0.385	1.59973e-30
Sub1	7.29085e-35	-0.290825	0.416	0.592	1.85414e-30
Acyp2	7.69822e-35	0.358273	0.682	0.542	1.95774e-30
Unc13b	8.43485e-35	0.283652	0.38	0.21	2.14507e-30
Rere	1.02908e-34	0.270867	0.951	0.921	2.61706e-30
Acer3	1.05745e-34	0.283322	0.44	0.26	2.68919e-30
Stag1	1.08568e-34	0.278267	0.964	0.927	2.761e-30
Sh3bgrl	2.04946e-34	0.255129	0.289	0.131	5.21199e-30
Exd2	2.08079e-34	0.272133	0.536	0.362	5.29166e-30
Gm48003	2.08168e-34	-0.322967	0.429	0.597	5.29393e-30
2210408F21Rik	2.08622e-34	0.327709	0.542	0.363	5.30547e-30
Gm29514	2.15693e-34	0.253918	0.259	0.109	5.48529e-30
Ano3	2.20887e-34	-0.306706	0.929	0.96	5.61738e-30
Tsnax	2.29959e-34	0.293489	0.768	0.627	5.84808e-30
Gm1043	2.32902e-34	-0.294102	0.532	0.689	5.92293e-30
Gabrb2	2.56739e-34	0.283281	0.919	0.861	6.52913e-30
Necab1	2.60865e-34	-0.416727	0.835	0.88	6.63405e-30
Dnajc1	2.84847e-34	0.28718	0.867	0.783	7.24395e-30
Fam49b	3.01573e-34	0.296236	0.875	0.796	7.66929e-30
Stxbp5	3.3591e-34	0.310468	0.718	0.578	8.54254e-30
Pou6f2	3.52154e-34	0.365193	0.396	0.226	8.95563e-30
Sos2	4.91412e-34	0.287908	0.507	0.327	1.24971e-29
Mcu	6.15343e-34	0.314837	0.743	0.596	1.56488e-29
Ccnl1	6.70192e-34	0.304967	0.727	0.588	1.70437e-29
Tia1	7.94286e-34	0.289244	0.856	0.763	2.01995e-29
Fkbp1a	8.50333e-34	-0.29716	0.634	0.764	2.16248e-29
Nin	9.04876e-34	-0.286898	0.674	0.798	2.30119e-29
5730522E02Rik	1.01589e-33	0.28396	0.98	0.961	2.58352e-29
Gm26618	1.06387e-33	0.278111	0.412	0.242	2.70552e-29
Mn1	1.07389e-33	-0.259465	0.21	0.378	2.73102e-29
Kcnt1	1.13037e-33	-0.298609	0.628	0.768	2.87465e-29
Bcas3	1.16223e-33	0.303435	0.859	0.767	2.95565e-29
Pde1a	1.57637e-33	0.389597	0.374	0.19	4.00886e-29
Nlk	1.86902e-33	0.307855	0.879	0.792	4.7531e-29
Faf1	2.16577e-33	0.287329	0.876	0.802	5.50777e-29
Arid5b	2.7422e-33	0.317098	0.497	0.318	6.97369e-29
A330008L17Rik	3.01453e-33	-0.422137	0.336	0.498	7.66626e-29
Aak1	3.09119e-33	0.27603	0.904	0.849	7.86122e-29
Rufy3	4.49934e-33	0.292237	0.777	0.663	1.14423e-28
Arhgef2	6.52568e-33	-0.279486	0.423	0.589	1.65955e-28
Clasp1	6.55735e-33	0.30754	0.708	0.564	1.6676e-28
Dmxl1	6.65352e-33	0.298862	0.851	0.747	1.69206e-28
Ccdc148	7.43369e-33	0.317886	0.678	0.528	1.89046e-28
Cystm1	9.99922e-33	-0.265979	0.356	0.533	2.5429e-28
Adgrl2	1.27764e-32	0.317225	0.819	0.705	3.24917e-28
Pcdh15	1.2861e-32	0.433443	0.262	0.113	3.27069e-28
Ypel2	1.38865e-32	-0.306642	0.669	0.794	3.53148e-28
C2cd2	1.59391e-32	-0.332876	0.359	0.529	4.05348e-28
Arhgap32	1.74043e-32	-0.299372	0.823	0.886	4.42609e-28
Gm1604a	1.80212e-32	-0.294453	0.548	0.692	4.58297e-28
Ssh2	2.00028e-32	0.295769	0.817	0.717	5.08691e-28
Fam169a	2.0694e-32	0.263888	0.393	0.227	5.2627e-28
4930428E07Rik	2.18588e-32	-0.334747	0.409	0.568	5.55892e-28
Gigyf2	2.20058e-32	0.295917	0.728	0.593	5.59628e-28
Rcan2	2.71343e-32	-0.298437	0.817	0.887	6.90054e-28
Tef	3.08619e-32	-0.278893	0.555	0.702	7.84849e-28
Cadps	3.18244e-32	0.29052	0.943	0.891	8.09326e-28
Lmbr1	3.66758e-32	0.29613	0.526	0.361	9.32701e-28
1110051M20Rik	6.27905e-32	0.293575	0.81	0.696	1.59683e-27
Cipc	6.85718e-32	-0.286093	0.473	0.629	1.74385e-27
Chgb	7.07541e-32	-0.324757	0.287	0.453	1.79935e-27
Ccm2	8.54248e-32	-0.282727	0.367	0.536	2.17244e-27
Shb	9.62445e-32	-0.254076	0.296	0.469	2.44759e-27
Nipbl	1.05887e-31	0.279013	0.833	0.733	2.6928e-27
Sestd1	1.46064e-31	0.259031	0.429	0.26	3.71456e-27
Gm16105	1.73257e-31	-0.25618	0.366	0.534	4.4061e-27
Chm	2.11784e-31	0.299452	0.656	0.51	5.38588e-27
Klhl2	2.29812e-31	-0.31614	0.733	0.825	5.84434e-27
Hlf	2.54191e-31	-0.273908	0.449	0.618	6.46433e-27
Tomm20	3.25611e-31	-0.273876	0.455	0.624	8.28062e-27
Kif1b	4.47813e-31	0.274006	0.913	0.854	1.13883e-26
Sh3bgrl3	6.27725e-31	-0.285184	0.318	0.487	1.59637e-26
Srgap2	7.9021e-31	0.291529	0.803	0.678	2.00958e-26
Sorbs2os	8.28097e-31	-0.293341	0.534	0.678	2.10593e-26
Bmpr2	1.14082e-30	0.287778	0.646	0.492	2.90122e-26
Eif4g3	1.14698e-30	0.277224	0.782	0.654	2.91689e-26
Nedd4l	1.1786e-30	-0.258396	0.929	0.97	2.9973e-26
Vav3	1.4174e-30	0.310723	0.612	0.451	3.60459e-26
2610316D01Rik	1.49699e-30	0.311595	0.515	0.346	3.807e-26
Ptpn9	1.58923e-30	0.278364	0.611	0.446	4.04157e-26
Gba2	1.59408e-30	-0.250232	0.246	0.406	4.05392e-26
Zfp950	1.69803e-30	0.262413	0.918	0.859	4.31827e-26
Pan3	1.97265e-30	0.268107	0.789	0.672	5.01665e-26
Pabpn1	2.0093e-30	0.305021	0.784	0.669	5.10986e-26
Pde4d	2.22e-30	0.334386	0.735	0.577	5.64569e-26
Cox5b	2.45836e-30	-0.294253	0.438	0.595	6.25185e-26
Ric8b	2.70812e-30	-0.268167	0.851	0.913	6.88702e-26
Icam5	3.49162e-30	-0.258447	0.445	0.606	8.87953e-26
Sorbs1	3.77578e-30	-0.258022	0.923	0.961	9.60218e-26
Elavl3	4.37414e-30	0.279817	0.765	0.625	1.11239e-25
Spata7	5.14093e-30	0.260189	0.629	0.473	1.30739e-25
Rbm26	5.19607e-30	0.251827	0.949	0.898	1.32141e-25
Fndc9	6.96434e-30	-0.298411	0.521	0.661	1.7711e-25
Nfyc	8.63161e-30	0.279198	0.637	0.484	2.19511e-25
Kcnb2	1.02771e-29	0.35147	0.816	0.696	2.61356e-25
Gpatch2	1.10942e-29	0.261718	0.553	0.388	2.82136e-25
Ubr3	1.11989e-29	0.269247	0.855	0.775	2.848e-25
Rprml	1.1277e-29	-0.258664	0.267	0.428	2.86786e-25
Pcdh10	1.13653e-29	0.309639	0.764	0.628	2.8903e-25
Coq3	1.17229e-29	0.251789	0.383	0.226	2.98125e-25
Gria4	1.3969e-29	0.286778	0.959	0.916	3.55246e-25
Cnrip1	1.63649e-29	0.26572	0.452	0.285	4.16177e-25
Phf24	1.99903e-29	-0.26168	0.64	0.774	5.08373e-25
H2afz	2.18873e-29	-0.297834	0.449	0.606	5.56617e-25
Ndufa11	2.46674e-29	-0.26286	0.334	0.507	6.27316e-25
Gm48749	2.8079e-29	-0.280428	0.218	0.376	7.14077e-25
Cabp1	2.8606e-29	-0.253694	0.274	0.435	7.27479e-25
Bbx	3.8623e-29	0.300465	0.708	0.579	9.82221e-25
Npat	5.0032e-29	0.253212	0.472	0.311	1.27236e-24
Bcr	5.3846e-29	-0.262189	0.701	0.806	1.36936e-24
Lzts1	5.75453e-29	-0.27442	0.554	0.691	1.46344e-24
Rpgr	7.13151e-29	0.289221	0.683	0.556	1.81361e-24
Ust	7.49755e-29	0.330937	0.5	0.342	1.9067e-24
Dlg1	7.51486e-29	0.260722	0.892	0.832	1.9111e-24
Lars	7.58445e-29	0.275132	0.602	0.452	1.9288e-24
Ildr2	8.79916e-29	0.253827	0.512	0.342	2.23772e-24
Gbf1	8.85099e-29	0.277458	0.713	0.578	2.25089e-24
Cacna1d	9.08101e-29	0.257603	0.953	0.923	2.30939e-24
Thsd4	1.14995e-28	-0.265836	0.169	0.316	2.92444e-24
Akt3	1.40198e-28	0.252248	0.929	0.878	3.56536e-24
Scrn1	1.42691e-28	-0.277588	0.573	0.705	3.62878e-24
Rxrg	1.46835e-28	-0.316395	0.353	0.503	3.73417e-24
Dcx	1.8152e-28	0.256222	0.408	0.247	4.61624e-24
Letm2	2.11896e-28	0.282709	0.576	0.424	5.38873e-24
Fam193a	2.28851e-28	0.266766	0.743	0.615	5.81991e-24
Arhgap12	2.70268e-28	0.278474	0.471	0.319	6.87319e-24
Pde4a	2.79439e-28	-0.254555	0.454	0.616	7.10642e-24
Garem1	3.84291e-28	-0.338945	0.62	0.732	9.77291e-24
Ndufb10	3.89557e-28	-0.269119	0.403	0.556	9.90683e-24
Tnr	4.14823e-28	0.282553	0.855	0.759	1.05494e-23
Sdccag8	4.45458e-28	0.273116	0.698	0.567	1.13284e-23
Ncoa2	4.68783e-28	0.261657	0.852	0.768	1.19216e-23
Nell2	4.73216e-28	0.273524	0.89	0.832	1.20344e-23
Tafa2	6.8952e-28	0.408524	0.626	0.475	1.75352e-23
Trip4	6.91393e-28	0.250419	0.539	0.377	1.75828e-23
Vti1b	7.95922e-28	-0.274352	0.575	0.716	2.02411e-23
Tenm2	8.69899e-28	0.282054	0.993	0.968	2.21224e-23
Acaca	1.10311e-27	0.278427	0.51	0.355	2.80532e-23
Grasp	1.1266e-27	-0.251291	0.277	0.437	2.86506e-23
Ptpn4	1.14001e-27	0.280353	0.768	0.66	2.89916e-23
Dgat2	1.2468e-27	-0.254971	0.308	0.466	3.17073e-23
Elp4	1.27705e-27	0.300748	0.678	0.557	3.24767e-23
Zcchc8	1.46178e-27	0.270603	0.536	0.39	3.71746e-23
Gas5	1.62356e-27	0.272117	0.719	0.588	4.12887e-23
Slc24a4	2.66493e-27	-0.255067	0.518	0.667	6.77719e-23
Bcl11a	2.82428e-27	0.266499	0.838	0.736	7.18244e-23
Prkar1b	3.4505e-27	0.25047	0.525	0.373	8.77496e-23
Firre	4.14967e-27	0.260572	0.587	0.439	1.0553e-22
Pitpnm2	4.66055e-27	-0.254386	0.44	0.591	1.18522e-22
Irf2	4.72564e-27	0.256352	0.433	0.278	1.20178e-22
Cspp1	5.14461e-27	0.266203	0.867	0.797	1.30832e-22
Kdm4b	5.28572e-27	-0.259781	0.389	0.542	1.34421e-22
Kcnt2	5.33819e-27	0.311951	0.425	0.268	1.35756e-22
Cwc27	5.65586e-27	0.261846	0.68	0.544	1.43834e-22
Celf4	6.90567e-27	0.290026	0.928	0.847	1.75618e-22
Dock9	1.01775e-26	0.251733	0.492	0.332	2.58823e-22
4930567K20Rik	1.37948e-26	-0.269469	0.211	0.356	3.50816e-22
Cntn6	1.46033e-26	0.302485	0.785	0.695	3.71377e-22
Vwa8	1.73744e-26	0.28156	0.692	0.566	4.41848e-22
Scai	1.79107e-26	0.26186	0.743	0.632	4.55486e-22
Zfp608	2.19335e-26	0.283247	0.444	0.287	5.57791e-22
Rabgap1	2.19871e-26	0.26012	0.817	0.713	5.59153e-22
Nxpe4	2.3892e-26	0.254988	0.532	0.372	6.07598e-22
Cacng3	2.6077e-26	-0.277828	0.67	0.767	6.63164e-22
Cmip	2.68816e-26	0.256075	0.646	0.498	6.83626e-22
Osbp2	2.70144e-26	-0.275947	0.694	0.788	6.87003e-22
Kazn	2.96573e-26	-0.256142	0.393	0.54	7.54215e-22
Kitl	2.97723e-26	-0.255242	0.181	0.324	7.5714e-22
Mnat1	3.51127e-26	0.266915	0.584	0.442	8.92951e-22
Celf1	4.05768e-26	-0.250964	0.902	0.936	1.03191e-21
Klf9	4.71212e-26	-0.252198	0.449	0.601	1.19834e-21
Snrnp48	5.03017e-26	0.271502	0.651	0.522	1.27922e-21
Tacc1	5.57539e-26	-0.254486	0.79	0.871	1.41788e-21
Eef1a1	7.42682e-26	0.30364	0.78	0.682	1.88871e-21
Zfhx3	8.549e-26	0.347505	0.852	0.736	2.1741e-21
Cadm1	9.66394e-26	0.363503	0.771	0.649	2.45764e-21
Kifap3	1.21534e-25	0.25415	0.894	0.831	3.09072e-21
Tspan7	1.37974e-25	-0.254726	0.809	0.889	3.50881e-21
Nek1	1.38325e-25	0.25665	0.544	0.4	3.51773e-21
Nhs	1.54021e-25	0.336278	0.453	0.306	3.91692e-21
Cox8a	1.6824e-25	-0.27661	0.556	0.681	4.27851e-21
Nell1	1.82389e-25	-0.355382	0.617	0.733	4.63833e-21
Immp2l	2.0687e-25	0.306962	0.862	0.787	5.26091e-21
Kdm3a	2.31169e-25	-0.263098	0.438	0.577	5.87887e-21
Supt3	2.43804e-25	0.273928	0.44	0.295	6.20018e-21
Pde1c	2.46086e-25	-0.482613	0.577	0.685	6.25821e-21
Slc38a2	2.90916e-25	-0.260095	0.344	0.492	7.3983e-21
Magi3	3.30729e-25	0.289229	0.579	0.438	8.41076e-21
Slc8a1	4.08983e-25	0.391154	0.294	0.16	1.04008e-20
Atp2a2	4.26136e-25	-0.28277	0.75	0.831	1.08371e-20
Cxxc4	5.31112e-25	0.259394	0.527	0.39	1.35067e-20
Nbeal1	6.76717e-25	0.260023	0.637	0.503	1.72096e-20
Uri1	7.89498e-25	0.268015	0.633	0.508	2.00777e-20
Atl2	8.32085e-25	-0.256172	0.404	0.544	2.11607e-20
Iqgap2	1.29882e-24	-0.279182	0.446	0.586	3.30302e-20
Tcaf1	1.35667e-24	-0.28834	0.697	0.79	3.45015e-20
Gm26917	1.63477e-24	0.26833	0.634	0.498	4.15737e-20
Gm30382	1.72326e-24	0.333879	0.594	0.453	4.38243e-20
Srpk1	1.91687e-24	-0.255863	0.529	0.665	4.8748e-20
Clvs1	2.01289e-24	-0.257107	0.9	0.929	5.11899e-20
Trpm7	2.82383e-24	0.255172	0.77	0.663	7.18127e-20
Vezt	2.82795e-24	0.250719	0.661	0.527	7.19176e-20
Tbc1d5	2.843e-24	0.268262	0.787	0.719	7.23003e-20
Ntrk2	3.063e-24	-0.378442	0.866	0.889	7.78952e-20
Klhdc10	3.48077e-24	0.269639	0.755	0.652	8.85194e-20
Sik2	6.18645e-24	-0.330815	0.576	0.683	1.57328e-19
Cox16	6.68002e-24	0.269517	0.828	0.747	1.69879e-19
Hdac8	7.56736e-24	0.261401	0.753	0.641	1.92446e-19
Aff2	1.00789e-23	0.253514	0.328	0.189	2.56316e-19
Chchd2	1.62084e-23	-0.274826	0.542	0.661	4.12195e-19
Cacna1b	1.70273e-23	0.251318	0.781	0.684	4.33022e-19
Fam120c	1.81566e-23	0.26118	0.642	0.513	4.61741e-19
Hecw1	2.28419e-23	0.274525	0.796	0.7	5.80893e-19
Acvr1c	2.62975e-23	-0.264143	0.378	0.522	6.68772e-19
Apba1	2.73591e-23	0.255866	0.591	0.446	6.95768e-19
Arid4b	3.22633e-23	0.252182	0.812	0.739	8.20488e-19
Grm3	3.51279e-23	-0.352165	0.835	0.885	8.93337e-19
Oxr1	4.60607e-23	0.2895	0.477	0.335	1.17137e-18
Snap91	5.95938e-23	0.251137	0.73	0.615	1.51553e-18
Hspa4	1.50956e-22	-0.275045	0.631	0.737	3.83897e-18
Dlgap3	1.60599e-22	-0.250302	0.655	0.766	4.08421e-18
Gm16351	2.3799e-22	-0.251511	0.431	0.578	6.05232e-18
Nfat5	2.83815e-22	0.27168	0.78	0.707	7.21771e-18
Lrch3	3.68882e-22	0.253014	0.594	0.466	9.38103e-18
Zmynd8	3.94983e-22	-0.25282	0.549	0.667	1.00448e-17
Slc24a3	4.13067e-22	0.275339	0.447	0.309	1.05047e-17
Rassf8	5.35191e-22	-0.258205	0.572	0.688	1.36104e-17
Asic2	7.13769e-22	0.305214	0.949	0.932	1.81519e-17
Osbpl6	1.2697e-21	0.254247	0.814	0.735	3.22897e-17
Tgfa	1.33316e-21	-0.254321	0.488	0.615	3.39035e-17
Cul5	1.76633e-21	0.254403	0.698	0.595	4.49194e-17
Efna5	4.26801e-21	0.364964	0.694	0.57	1.0854e-16
Hs6st3	7.96527e-21	-0.277447	0.939	0.966	2.02565e-16
Atp11c	1.46608e-20	0.252762	0.528	0.393	3.72838e-16
Mme	1.54924e-20	-0.3116	0.339	0.457	3.93988e-16
Srgap1	7.03172e-20	-0.300627	0.779	0.817	1.78824e-15
Atp6v0c	1.91824e-19	0.27143	0.918	0.882	4.87828e-15
March1	9.00225e-19	0.406052	0.67	0.547	2.28936e-14
Maml3	9.86402e-19	0.260865	0.625	0.512	2.50852e-14
Edil3	2.32661e-18	0.275454	0.483	0.356	5.91681e-14
4930415C11Rik	2.46147e-18	-0.317312	0.322	0.435	6.25976e-14
Gulp1	4.75077e-18	0.259841	0.426	0.295	1.20817e-13
Kcnh7	9.37771e-18	0.31289	0.79	0.726	2.38485e-13
Thsd7a	1.4929e-17	-0.30067	0.867	0.861	3.7966e-13
Galnt17	2.49788e-17	-0.311801	0.7	0.774	6.35236e-13
Peli1	1.13397e-16	-0.268891	0.495	0.591	2.88381e-12
Pdzrn4	3.929e-15	0.286338	0.484	0.37	9.99183e-11
Pcdh11x	7.07177e-15	0.258329	0.821	0.753	1.79842e-10
Pcsk1n	1.21753e-14	0.26923	0.854	0.816	3.0963e-10
Cdh9	4.51066e-13	-0.272413	0.69	0.744	1.14711e-08
Mir99ahg	1.38359e-12	0.265846	0.548	0.45	3.51861e-08
Ina	1.61291e-12	-0.291247	0.321	0.414	4.10179e-08
Unc13c	1.55151e-10	-0.253176	0.896	0.9	3.94566e-06
Sox2ot	5.66724e-08	0.304682	0.464	0.401	0.00144124
Prkg1	7.03609e-08	0.338571	0.475	0.406	0.00178935
Trpm3	0.015378	-0.31384	0.496	0.513	1

## Sheet: thiamine_cluster3R61vvsNTv
Column1	p_val	avg_log2FC	pct.1	pct.2	p_val_adj
Lrrk2	1.06817e-128	-1.1657	0.098	0.831	2.71647e-124
Gm15810	1.45489e-123	-1.28211	0.109	0.819	3.69993e-119
Gm13269	6.75607e-122	-1.26206	0.068	0.701	1.71814e-117
Mhrt	6.61452e-119	-0.972938	0.034	0.571	1.68214e-114
Scn4b	3.15484e-115	-0.952545	0.043	0.599	8.02306e-111
5330417C22Rik	3.98787e-113	-1.13808	0.105	0.785	1.01416e-108
Lrtm1	2.39897e-111	-1.17562	0.107	0.785	6.10082e-107
Gsg1l	9.5319e-109	-0.950921	0.052	0.61	2.42406e-104
Actn2	3.11232e-108	-1.28427	0.124	0.814	7.91494e-104
Gabrd	8.62251e-107	-0.859585	0.052	0.61	2.19279e-102
Gm10848	5.54737e-105	-1.16614	0.06	0.616	1.41075e-100
Pde7b	2.3874e-100	-1.70791	0.893	0.994	6.07139e-96
Rgs9	6.63638e-99	-1.82426	0.784	0.983	1.6877e-94
Neto2	4.93738e-97	-1.12399	0.127	0.774	1.25562e-92
1700003D09Rik	3.47861e-94	-0.728058	0.043	0.525	8.84645e-90
Stk32a	2.11369e-93	-1.03862	0.075	0.633	5.37533e-89
4933424G05Rik	6.54675e-93	-0.933583	0.069	0.61	1.6649e-88
Npas2	2.07732e-92	-1.22079	0.194	0.859	5.28284e-88
Zfyve28	2.1362e-92	-0.95704	0.116	0.746	5.43257e-88
Ngef	2.70298e-92	-1.051	0.145	0.797	6.87394e-88
Pde10a	1.16697e-91	-2.49045	0.957	0.994	2.96773e-87
Ppp1r1b	1.63356e-91	-1.14599	0.17	0.847	4.1543e-87
Cacng3	6.77967e-91	-0.972251	0.125	0.763	1.72414e-86
Ryr3	2.5116e-90	-1.71758	0.918	0.994	6.38726e-86
Kcnt1	4.18629e-89	-0.871808	0.119	0.74	1.06462e-84
Sept11	6.34476e-89	-0.876717	0.128	0.768	1.61354e-84
Kcnh4	8.76118e-89	-0.604639	0.026	0.435	2.22806e-84
Ror1	2.99294e-88	-0.78336	0.03	0.452	7.61134e-84
Galnt18	5.5109e-88	-0.9578	0.09	0.655	1.40148e-83
Cacnb2	6.54234e-88	-1.88799	0.933	0.994	1.66378e-83
Rap1gap	2.02786e-87	-1.16062	0.209	0.898	5.15706e-83
Kcnip3	2.15971e-87	-0.969748	0.096	0.667	5.49236e-83
Tbc1d8	2.35593e-87	-0.927153	0.1	0.678	5.99137e-83
Dlgap3	3.07927e-87	-0.925333	0.112	0.718	7.83088e-83
2010300C02Rik	6.68551e-87	-1.22353	0.223	0.876	1.70019e-82
Rarb	3.29811e-85	-1.53136	0.903	0.989	8.38744e-81
Celf2	5.36633e-85	-2.08578	0.988	1	1.36471e-80
Camk4	1.4478e-84	-1.49492	0.813	0.972	3.6819e-80
Pde1b	2.89345e-84	-1.1435	0.222	0.887	7.35833e-80
Slit3	3.13184e-84	-1.32933	0.859	0.983	7.96459e-80
Ryr1	3.73647e-84	-0.553775	0.019	0.384	9.50222e-80
Ccdc88c	4.62189e-84	-0.968849	0.09	0.638	1.17539e-79
Gm49906	4.98296e-84	-1.24899	0.051	0.514	1.26722e-79
Cnr1	5.27047e-84	-1.42258	0.059	0.531	1.34033e-79
Mapk4	2.108e-83	-1.14158	0.167	0.791	5.36086e-79
Celf5	1.34344e-82	-0.826309	0.112	0.701	3.41651e-78
Cx3cl1	1.4518e-82	-0.993802	0.138	0.751	3.69208e-78
Dlgap2	1.45349e-82	-1.3114	0.919	0.994	3.69637e-78
Myt1l	2.13972e-82	-1.3165	0.927	0.989	5.44152e-78
Pcdh9	5.11133e-82	1.84174	1	1	1.29986e-77
Phf24	9.82408e-82	-0.877241	0.134	0.751	2.49836e-77
Lynx1	1.31782e-81	-0.665853	0.046	0.497	3.35135e-77
Cacna1e	1.40398e-81	-1.22233	0.856	0.989	3.57045e-77
Gpr158	1.77723e-81	-1.33777	0.916	0.994	4.51968e-77
Sv2c	1.81801e-81	-0.953041	0.132	0.74	4.62339e-77
Gm19410	3.76707e-81	-0.745088	0.02	0.379	9.58002e-77
Camkv	7.403e-81	-1.20312	0.3	0.927	1.88266e-76
Prkar2b	7.66784e-81	-0.851408	0.15	0.797	1.95001e-76
Grin2a	1.14856e-80	-1.12641	0.862	0.989	2.92089e-76
Sorcs2	1.78984e-80	-0.942652	0.081	0.599	4.55173e-76
Grin2b	2.57846e-80	-1.46501	0.954	0.994	6.55727e-76
Hpca	3.00329e-80	-1.12037	0.172	0.808	7.63767e-76
Slc4a4	4.08659e-80	-1.22986	0.856	0.983	1.03926e-75
Tspoap1	4.54243e-80	-0.822332	0.112	0.689	1.15519e-75
Rasgef1a	1.11697e-79	-0.958868	0.21	0.859	2.84057e-75
Plk2	1.43587e-79	-0.918898	0.093	0.633	3.65156e-75
Prelid3a	3.0121e-79	-0.840105	0.142	0.763	7.66008e-75
Gnal	3.3149e-79	-1.16252	0.879	0.989	8.43013e-75
Wipf3	3.65336e-79	-0.998482	0.1	0.644	9.29086e-75
Dgkb	6.57281e-79	-1.72318	0.967	1	1.67153e-74
Rgs7bp	2.8073e-78	-1.20275	0.828	0.977	7.13923e-74
Erc2	4.83794e-78	-1.43232	0.946	0.994	1.23034e-73
Gria3	1.29487e-77	-1.09544	0.907	0.994	3.29299e-73
Ppp4r4	2.18081e-77	-0.919619	0.091	0.616	5.54601e-73
Plcb1	4.67874e-77	-1.60063	0.97	0.994	1.18985e-72
Lrrc7	6.18065e-77	-1.6172	0.965	0.994	1.5718e-72
Mpp6	7.30917e-77	-0.953457	0.144	0.751	1.85879e-72
Nkain2	7.67322e-77	1.31178	1	1	1.95138e-72
Rbfox1	1.0418e-76	-2.01043	0.979	0.994	2.6494e-72
Arhgap10	1.65907e-76	-1.20252	0.287	0.887	4.21918e-72
Grm5	1.80596e-76	-1.67905	0.978	0.994	4.59275e-72
Sorbs2	5.68662e-76	-1.11621	0.863	0.972	1.44616e-71
Pdzd2	7.47465e-76	-1.18218	0.202	0.814	1.90088e-71
Zfp385b	1.1425e-75	-1.21732	0.88	0.972	2.90548e-71
Rhobtb2	1.36209e-75	-0.869044	0.083	0.588	3.46393e-71
Kcnq5	1.78682e-75	-1.78379	0.964	0.994	4.54407e-71
Rasgrp2	4.4219e-75	-0.805835	0.077	0.571	1.12453e-70
Nrg1	4.51185e-75	-1.88175	0.981	1	1.14741e-70
Arhgap20	4.88526e-75	-0.870771	0.145	0.74	1.24237e-70
Kcnip2	1.51308e-74	-0.856856	0.09	0.599	3.84792e-70
Cacna2d3	1.73198e-74	-1.71865	0.954	0.983	4.40459e-70
Srrm3	1.75656e-74	-0.959952	0.187	0.791	4.46712e-70
Gm28905	2.84046e-74	-1.37043	0.241	0.831	7.22358e-70
Fam110b	4.55367e-74	-0.982308	0.184	0.797	1.15804e-69
Nebl	9.28104e-74	-1.09998	0.853	0.983	2.36026e-69
Arpp21	1.08308e-73	-1.3338	0.943	0.989	2.75439e-69
Bcr	4.04526e-73	-0.839955	0.166	0.791	1.02875e-68
Sh2d5	5.72256e-73	-0.678332	0.049	0.475	1.45531e-68
Sh3rf2	6.51306e-73	-0.86583	0.072	0.542	1.65634e-68
Fgf14	8.83848e-73	-1.70786	0.982	0.994	2.24771e-68
Gcnt2	9.16054e-73	-0.873272	0.061	0.508	2.32962e-68
Kcnd2	3.12349e-72	-1.73841	0.982	0.994	7.94334e-68
Ptk2b	3.20944e-72	-0.883025	0.157	0.757	8.16194e-68
Nexn	8.90124e-72	-0.922013	0.165	0.774	2.26367e-67
Mtus2	1.1058e-71	-0.79221	0.14	0.718	2.81216e-67
Ano3	1.16185e-71	-1.15705	0.762	0.983	2.95469e-67
Kalrn	4.21348e-71	-1.04622	0.901	0.977	1.07153e-66
Sntb2	9.68902e-71	-0.853589	0.086	0.576	2.46401e-66
Magi2	1.06028e-70	1.44667	1	1	2.69639e-66
Cntn4	1.64548e-70	-1.36205	0.924	0.989	4.18461e-66
Fstl4	2.39168e-70	-0.972737	0.177	0.763	6.08229e-66
Ano6	3.00418e-70	-0.747088	0.105	0.627	7.63993e-66
Syndig1l	3.13421e-70	-0.688459	0.06	0.503	7.9706e-66
Ankrd33b	4.55802e-70	-0.748922	0.074	0.542	1.15915e-65
Gli3	4.56998e-70	-0.751433	0.038	0.424	1.16219e-65
Ank2	7.15123e-70	1.25234	1	1	1.81863e-65
Gabrg3	1.19802e-69	-1.32261	0.935	0.994	3.04667e-65
Elmod1	1.72791e-69	-1.10821	0.831	0.972	4.39424e-65
Phactr1	1.91262e-69	-1.54665	1	1	4.86399e-65
Cacng4	2.21998e-69	-0.739177	0.066	0.514	5.64564e-65
Itpr1	3.72688e-69	-1.19975	0.801	0.972	9.47782e-65
Fbxl16	3.739e-69	-0.830256	0.098	0.605	9.50865e-65
Clip4	4.20389e-69	-0.757345	0.092	0.593	1.06909e-64
Caln1	5.40777e-69	-1.17271	0.878	0.989	1.37525e-64
Samd5	7.65117e-69	-0.845492	0.093	0.588	1.94577e-64
Reln	1.33013e-68	-1.09246	0.162	0.74	3.38266e-64
Csmd1	1.58948e-68	-1.474	0.979	1	4.0422e-64
Gm16351	1.7067e-68	-0.746341	0.051	0.458	4.34031e-64
Hs6st3	2.53649e-68	-1.82959	0.928	0.966	6.45054e-64
Pde4b	3.09503e-68	1.50614	1	1	7.87097e-64
Edil3	3.58424e-68	1.56684	0.999	0.989	9.11509e-64
Mei4	5.43163e-68	-0.938608	0.107	0.621	1.38132e-63
Gabra4	7.29843e-68	-1.00134	0.26	0.847	1.85606e-63
Kctd16	1.7247e-67	-1.27407	0.939	0.994	4.38608e-63
Pcsk2	2.85642e-67	-1.14507	0.895	0.983	7.26415e-63
Traip	3.59822e-67	-0.597413	0.036	0.401	9.15064e-63
Pde2a	4.74794e-67	-1.20195	0.377	0.904	1.20745e-62
Bsn	9.76407e-67	-0.684275	0.078	0.542	2.4831e-62
Gm1604a	1.00736e-66	-0.730216	0.067	0.503	2.56183e-62
Mctp1	1.3131e-66	-1.12017	0.891	0.96	3.33935e-62
Hrh3	1.62031e-66	-0.390602	0.012	0.294	4.12061e-62
Ntrk3	1.67963e-66	-1.07258	0.847	0.96	4.27147e-62
Cacna1c	1.79456e-66	-1.01154	0.898	0.994	4.56373e-62
Lzts1	2.3005e-66	-0.773865	0.091	0.571	5.85041e-62
Gm1043	3.37209e-66	-0.711329	0.066	0.497	8.57556e-62
Fam189a1	3.6451e-66	-0.869304	0.138	0.678	9.26985e-62
Ppargc1b	4.61448e-66	-0.666821	0.063	0.492	1.17351e-61
Ptprn2	7.3569e-66	-0.942437	0.893	0.972	1.87093e-61
Ctxn1	7.37006e-66	-0.674121	0.082	0.554	1.87428e-61
Pld5	7.61021e-66	-0.916576	0.078	0.531	1.93535e-61
Syt1	1.03108e-65	-1.36031	0.975	1	2.62215e-61
C78859	1.11375e-65	-0.791672	0.159	0.74	2.83238e-61
Sorbs2os	1.60622e-65	-0.675222	0.063	0.492	4.08477e-61
Ttyh1	1.84865e-65	-0.853788	0.197	0.785	4.7013e-61
Lmo2	2.71476e-65	-0.537228	0.027	0.362	6.9039e-61
4930525C09Rik	2.91575e-65	-0.412869	0.012	0.288	7.41504e-61
Gm36756	3.12135e-65	-0.382367	0.014	0.299	7.93791e-61
Dnm3	3.12617e-65	1.36915	1	0.989	7.95017e-61
Camkk2	5.27255e-65	-0.803579	0.153	0.723	1.34086e-60
Atp2b1	7.27567e-65	-1.26304	0.981	0.994	1.85027e-60
Frmpd4	7.70455e-65	-1.20349	0.917	0.983	1.95934e-60
Fam184b	2.58683e-64	-0.653283	0.048	0.435	6.57857e-60
March1	2.93043e-64	1.83425	0.982	0.712	7.45238e-60
Rasgrp1	3.32916e-64	-0.833179	0.171	0.751	8.4664e-60
Meis2	3.48727e-64	-1.17748	0.95	1	8.86849e-60
Dab1	3.81049e-64	-1.20963	0.924	0.966	9.69046e-60
Dclk1	3.9521e-64	-1.0677	0.921	0.994	1.00506e-59
Ppp1r1a	4.01113e-64	-0.835312	0.073	0.508	1.02007e-59
St18	5.364e-64	1.54105	0.999	0.977	1.36412e-59
Pcp4	6.82611e-64	-1.48488	0.823	0.983	1.73595e-59
Gm15680	9.5818e-64	-0.578674	0.026	0.35	2.43675e-59
Mcf2l	1.29379e-63	-0.636266	0.065	0.492	3.29024e-59
B230334C09Rik	1.61503e-63	-0.704733	0.135	0.672	4.10718e-59
Gsdme	1.97186e-63	-0.905412	0.151	0.695	5.01462e-59
Ldb2	2.1181e-63	-0.820512	0.121	0.644	5.38655e-59
Dzip1l	3.66049e-63	-0.480954	0.035	0.384	9.309e-59
A730090N16Rik	3.94829e-63	-0.472615	0.032	0.373	1.00409e-58
Dpp6	4.31428e-63	-0.97982	0.93	0.994	1.09716e-58
Baiap2	1.37581e-62	-1.09929	0.502	0.96	3.49883e-58
Pitpnc1	1.97995e-62	-0.824422	0.126	0.633	5.03521e-58
Gm48677	2.44028e-62	-0.53711	0.041	0.407	6.20588e-58
Tcf4	2.61166e-62	1.45554	0.989	0.831	6.64172e-58
Cntn5	5.14935e-62	-1.91046	0.945	0.96	1.30953e-57
Actn1	5.6672e-62	-0.853116	0.194	0.774	1.44122e-57
Gm10754	5.75708e-62	-1.61239	0.595	0.921	1.46408e-57
Nrxn3	8.30028e-62	-1.46647	0.988	0.994	2.11084e-57
Cnksr2	8.56613e-62	-1.00819	0.88	0.983	2.17845e-57
Spata16	1.0156e-61	-0.538426	0.009	0.254	2.58276e-57
Itga9	1.39657e-61	-0.555789	0.025	0.339	3.55162e-57
Dpy19l3	1.43222e-61	-0.538993	0.04	0.401	3.64228e-57
Gnb5	2.10019e-61	-0.842475	0.17	0.729	5.34101e-57
Ripor2	2.26454e-61	-0.918979	0.206	0.768	5.75896e-57
Epyc	2.35265e-61	-0.345656	0.009	0.254	5.98303e-57
Ptpn5	2.36264e-61	-1.02556	0.338	0.893	6.00842e-57
Kcnab1	2.73397e-61	-1.18662	0.96	0.994	6.95276e-57
Gm50024	3.17181e-61	-0.551426	0.03	0.356	8.06623e-57
Acvr1c	3.5165e-61	-0.70904	0.068	0.486	8.94282e-57
Lrp1b	8.52408e-61	1.00861	1	1	2.16776e-56
Ajap1	1.57452e-60	-0.620446	0.069	0.492	4.00415e-56
Celf3	2.2396e-60	-0.671393	0.087	0.537	5.69552e-56
Gm13944	2.282e-60	-0.704874	0.062	0.463	5.80334e-56
Egr1	2.43058e-60	-0.61678	0.041	0.401	6.1812e-56
Plekha6	2.5849e-60	-0.629346	0.073	0.503	6.57367e-56
Car11	2.93874e-60	-0.797555	0.186	0.763	7.47351e-56
Robo2	3.86723e-60	-1.03129	0.925	1	9.83475e-56
Cabp1	3.9288e-60	-0.545377	0.041	0.395	9.99133e-56
Gprin3	4.33401e-60	-1.16278	0.357	0.881	1.10218e-55
Lzts3	4.83639e-60	-0.724119	0.104	0.582	1.22994e-55
Syt7	5.66798e-60	-0.692247	0.103	0.582	1.44142e-55
Kcna4	6.87225e-60	-0.708641	0.081	0.514	1.74768e-55
Gm13974	9.49831e-60	-0.672721	0.035	0.367	2.41552e-55
Atp2b2	1.31751e-59	-0.87889	0.849	0.983	3.35055e-55
Ttll11	1.95728e-59	-0.721175	0.14	0.667	4.97755e-55
Dock7	4.7637e-59	-0.735122	0.148	0.672	1.21146e-54
Camk2b	5.01694e-59	-1.07099	0.403	0.915	1.27586e-54
Smpd3	5.83154e-59	-1.06175	0.301	0.842	1.48302e-54
Coch	6.77004e-59	-0.52145	0.039	0.384	1.72169e-54
Syndig1	6.85524e-59	-0.745562	0.144	0.672	1.74336e-54
Ramp1	8.27513e-59	-0.667728	0.084	0.525	2.10445e-54
Gm5441	8.70823e-59	-0.595718	0.061	0.458	2.21459e-54
Sgk1	1.00575e-58	-1.09546	0.282	0.819	2.55772e-54
Galnt13	1.62749e-58	-1.0144	0.943	0.989	4.13887e-54
Zbtb20	2.03222e-58	1.2112	0.999	0.977	5.16815e-54
Cdh9	2.15325e-58	-1.07395	0.22	0.763	5.47593e-54
Sh3rf3	2.31935e-58	-0.666821	0.13	0.638	5.89835e-54
St6galnac5	3.15557e-58	-0.887347	0.144	0.65	8.02494e-54
Prickle2	3.37811e-58	1.38201	0.999	0.927	8.59088e-54
Pitpnm2	3.73021e-58	-0.584585	0.053	0.429	9.48631e-54
Adcy5	3.96765e-58	-1.14814	0.701	0.949	1.00901e-53
Rgs4	4.38484e-58	-0.65736	0.06	0.452	1.11511e-53
Pcp4l1	5.48535e-58	-0.708006	0.093	0.548	1.39498e-53
Sez6	6.01837e-58	-0.838189	0.191	0.763	1.53053e-53
Dcc	6.11822e-58	-1.23416	0.979	0.994	1.55592e-53
A330008L17Rik	8.82931e-58	-0.726093	0.056	0.435	2.24538e-53
Mtcl1	9.7877e-58	-0.951236	0.237	0.808	2.48911e-53
Galnt17	1.25789e-57	-0.971184	0.16	0.684	3.19895e-53
Gm28494	1.37077e-57	-0.528819	0.022	0.311	3.486e-53
Cntnap3	2.01181e-57	-0.549176	0.019	0.294	5.11623e-53
Tbc1d30	3.00054e-57	-0.572763	0.063	0.458	7.63068e-53
Kctd1	3.29202e-57	-0.955395	0.273	0.819	8.37194e-53
Myh10	4.07248e-57	-0.766905	0.145	0.667	1.03567e-52
Itpka	6.93029e-57	-0.671467	0.074	0.486	1.76244e-52
Sipa1l1	8.95418e-57	-0.835663	0.815	0.977	2.27714e-52
Cntnap2	8.9553e-57	-1.47481	0.979	0.994	2.27742e-52
Kcnk2	1.02442e-56	-1.22571	0.379	0.87	2.60521e-52
Kif17	1.07636e-56	-0.527877	0.057	0.435	2.73728e-52
Hlf	1.49848e-56	-0.605338	0.066	0.463	3.81079e-52
Grik5	1.94234e-56	-0.718337	0.184	0.751	4.93957e-52
Kcnma1	3.11887e-56	-0.881568	0.916	0.989	7.9316e-52
Rerg	3.2491e-56	-0.644423	0.046	0.395	8.26278e-52
Kcnh1	3.61184e-56	-0.750396	0.137	0.644	9.18528e-52
Dock10	6.68434e-56	1.28249	0.999	0.983	1.69989e-51
Tcf12	6.9931e-56	1.30398	0.995	0.915	1.77841e-51
Mbp	8.16555e-56	1.17378	1	1	2.07658e-51
Epha6	9.72972e-56	-0.938466	0.927	0.977	2.47436e-51
Reep1	1.19986e-55	-0.882018	0.196	0.723	3.05137e-51
9630028H03Rik	1.46629e-55	-1.05015	0.332	0.842	3.72893e-51
Fndc9	1.74535e-55	-0.695694	0.088	0.514	4.43861e-51
Cplx2	1.84612e-55	-0.699334	0.149	0.672	4.69488e-51
Chst11	2.32938e-55	-0.593208	0.078	0.497	5.92385e-51
Gm16105	2.37595e-55	-0.508191	0.041	0.379	6.04227e-51
4930567K20Rik	2.48283e-55	-0.545063	0.03	0.333	6.3141e-51
Iqgap2	2.79596e-55	-0.561026	0.043	0.384	7.1104e-51
Sptbn2	2.86729e-55	-0.588248	0.073	0.48	7.2918e-51
1700024B18Rik	3.04485e-55	-0.56864	0.058	0.435	7.74335e-51
Tmeff2	4.57203e-55	1.29718	0.999	1	1.16271e-50
Meg3	4.59261e-55	-1.16477	0.994	1	1.16795e-50
Slc24a2	4.91706e-55	1.16739	1	1	1.25046e-50
Cdc42ep3	6.63581e-55	-0.640227	0.061	0.441	1.68755e-50
Enpp2	6.86515e-55	1.27753	0.985	0.944	1.74588e-50
Nin	8.65415e-55	-0.792031	0.215	0.763	2.20084e-50
Cdh13	9.78906e-55	-1.1103	0.251	0.774	2.48946e-50
Gm26691	1.19941e-54	-0.949714	0.24	0.768	3.05023e-50
Zmat4	1.37063e-54	-0.600594	0.032	0.339	3.48564e-50
Plcl1	1.43203e-54	1.34123	0.997	0.994	3.6418e-50
Gm47591	1.67455e-54	-0.616264	0.05	0.395	4.25856e-50
Prr5l	2.27673e-54	1.39101	0.974	0.904	5.78995e-50
Necab1	2.29801e-54	-1.13768	0.105	0.542	5.84408e-50
Gm45159	3.3709e-54	-0.638857	0.112	0.582	8.57254e-50
Gm10419	4.25813e-54	-0.565705	0.078	0.492	1.08289e-49
Tesc	6.8475e-54	-0.76117	0.112	0.571	1.74139e-49
Spred2	6.92496e-54	-0.730644	0.1	0.542	1.76109e-49
Ttyh3	1.12664e-53	-0.485603	0.044	0.384	2.86517e-49
Tmem178b	1.26797e-53	1.11744	0.999	0.966	3.22457e-49
Gm47423	1.50878e-53	-0.690651	0.022	0.294	3.83698e-49
Osbpl8	1.60663e-53	-0.995277	0.848	0.977	4.08582e-49
Hs3st5	1.78141e-53	-0.952343	0.187	0.695	4.5303e-49
Unc13a	2.90981e-53	-0.546039	0.07	0.463	7.39994e-49
Gm42456	3.13476e-53	-0.51084	0.051	0.401	7.97201e-49
Kcnq2	4.02482e-53	-0.679152	0.108	0.554	1.02355e-48
1700016P03Rik	4.2753e-53	-0.756289	0.017	0.271	1.08725e-48
Trank1	4.99116e-53	-0.949866	0.609	0.921	1.2693e-48
Adamts3	5.23726e-53	-0.917794	0.308	0.847	1.33189e-48
Lrrc10b	6.34559e-53	-0.43601	0.031	0.333	1.61375e-48
Cpne5	6.98418e-53	-0.871231	0.338	0.876	1.77615e-48
Pdzd4	9.29367e-53	-0.653804	0.12	0.588	2.36347e-48
Lrrtm4	1.13486e-52	-1.25603	0.974	0.989	2.88606e-48
Gpr83	1.273e-52	-0.455684	0.023	0.299	3.23737e-48
Gm38413	1.59206e-52	-0.486249	0.047	0.384	4.04878e-48
Slc25a25	1.71302e-52	-0.597854	0.061	0.429	4.35638e-48
Shank3	1.72788e-52	-0.58475	0.059	0.424	4.39417e-48
Unc79	1.93575e-52	-0.765251	0.791	0.972	4.9228e-48
Arl15	2.21503e-52	-0.829276	0.851	0.983	5.63305e-48
Car12	3.12894e-52	-0.543421	0.036	0.345	7.95721e-48
Gria1	3.56422e-52	-0.864263	0.944	0.989	9.06418e-48
Myo1b	5.64414e-52	-0.667706	0.093	0.52	1.43536e-47
Samd12	5.65876e-52	-0.816596	0.887	0.972	1.43908e-47
Abat	6.16103e-52	-0.746991	0.206	0.763	1.56681e-47
Slc8a2	6.83428e-52	-0.457581	0.038	0.356	1.73803e-47
Camk2a	7.11385e-52	-0.982166	0.656	0.921	1.80912e-47
Neto1	7.52569e-52	-0.981296	0.744	0.944	1.91386e-47
Gm48003	7.66767e-52	-0.608912	0.063	0.429	1.94996e-47
4930415C11Rik	8.36032e-52	-0.6067	0.038	0.35	2.12611e-47
A830092H15Rik	9.2924e-52	-0.372411	0.023	0.294	2.36315e-47
Rimbp2	9.96656e-52	-0.677896	0.137	0.61	2.5346e-47
Clasp2	1.17292e-51	1.13227	0.994	0.96	2.98286e-47
Ier5l	1.19175e-51	-0.442103	0.024	0.299	3.03074e-47
Frmd5	1.23107e-51	1.28058	0.999	0.989	3.13073e-47
Grid1	2.12379e-51	-0.765941	0.865	0.955	5.40101e-47
Kcnip4	2.36954e-51	-1.35867	0.983	0.977	6.02599e-47
Rem2	2.59055e-51	-0.393802	0.026	0.305	6.58802e-47
Kcnh3	3.59436e-51	-0.484299	0.045	0.373	9.14082e-47
Wwc1	4.33561e-51	-0.506016	0.05	0.39	1.10259e-46
Slc24a4	5.327e-51	-0.667758	0.067	0.435	1.35471e-46
Utrn	6.45807e-51	-0.825568	0.186	0.689	1.64235e-46
Gabrb3	6.51378e-51	-0.803706	0.929	0.983	1.65652e-46
Inpp4a	7.28513e-51	-0.650548	0.128	0.599	1.85268e-46
Erbb4	7.63487e-51	1.66323	0.979	0.836	1.94162e-46
Lingo3	1.26275e-50	-0.427245	0.032	0.328	3.21131e-46
Ncam2	1.67194e-50	1.24744	1	0.989	4.25192e-46
Atxn1	1.84069e-50	-0.902482	0.972	0.994	4.68107e-46
Dapk1	2.20328e-50	-0.780901	0.253	0.774	5.60317e-46
Ano2	2.34868e-50	-0.696722	0.062	0.418	5.97292e-46
Prmt8	3.06965e-50	-0.525548	0.068	0.441	7.80641e-46
Dach1	3.26869e-50	-1.08826	0.773	0.944	8.3126e-46
D430041D05Rik	3.62524e-50	-0.958713	0.367	0.842	9.21935e-46
Clvs1	3.85801e-50	-0.94229	0.466	0.904	9.8113e-46
Jakmip1	3.91196e-50	-0.619661	0.109	0.554	9.94851e-46
Plxna4	4.28378e-50	-0.60261	0.103	0.537	1.08941e-45
Rasd2	4.39122e-50	-0.605219	0.075	0.458	1.11673e-45
Rgs20	5.71695e-50	-1.10606	0.342	0.808	1.45388e-45
Dbpht2	5.74984e-50	-0.31469	0.016	0.26	1.46224e-45
Speg	5.81828e-50	-0.517103	0.071	0.452	1.47965e-45
Camk2n1	6.46306e-50	-0.787871	0.193	0.718	1.64362e-45
Tiam1	6.70189e-50	-0.747978	0.119	0.559	1.70436e-45
Epb41	6.79853e-50	-0.870971	0.34	0.847	1.72893e-45
Rbfox3	7.27205e-50	-0.948322	0.67	0.938	1.84935e-45
Grin1	7.41991e-50	-0.843211	0.748	0.949	1.88696e-45
Slc2a13	7.53666e-50	-0.868281	0.747	0.96	1.91665e-45
Pmepa1	7.57137e-50	-0.742345	0.105	0.537	1.92547e-45
Fam49a	9.03669e-50	-0.699969	0.155	0.638	2.29812e-45
Rxrg	9.54676e-50	-0.685557	0.058	0.407	2.42784e-45
Slc8a1	1.11282e-49	1.48009	0.937	0.695	2.83002e-45
Pacs1	1.39783e-49	-0.646122	0.15	0.644	3.55483e-45
Mog	2.07578e-49	1.1881	0.969	0.898	5.27891e-45
Ncam1	2.50856e-49	1.08884	0.999	0.977	6.37953e-45
Trim46	2.73658e-49	-0.648465	0.112	0.554	6.95941e-45
Snph	3.71555e-49	-0.544884	0.077	0.463	9.44901e-45
Penk	4.14664e-49	-2.00812	0.229	0.695	1.05453e-44
Gm13052	4.32782e-49	-0.589784	0.083	0.475	1.10061e-44
Sox2ot	9.14552e-49	1.17417	0.988	0.944	2.3258e-44
Kcnb1	9.6888e-49	-0.664254	0.124	0.576	2.46396e-44
Scn3a	1.04661e-48	-0.794921	0.237	0.757	2.66164e-44
Rnf207	1.2129e-48	-0.482352	0.045	0.362	3.08452e-44
Otulinl	1.22322e-48	-0.546567	0.066	0.429	3.11076e-44
Dbn1	1.33944e-48	-0.553845	0.109	0.548	3.40632e-44
Spock2	1.71212e-48	-0.634041	0.106	0.537	4.35409e-44
Ssbp4	2.02552e-48	-0.602074	0.09	0.492	5.15109e-44
Plxdc2	2.02673e-48	1.27108	0.969	0.904	5.15417e-44
Crocc	3.07625e-48	-0.522076	0.053	0.384	7.82322e-44
Ctnna2	3.30832e-48	1.26729	1	0.994	8.41338e-44
Drd1	3.39748e-48	-0.773079	0.072	0.435	8.64013e-44
Grm4	3.59129e-48	-0.419447	0.035	0.328	9.13301e-44
Fras1	3.93673e-48	-0.744901	0.238	0.757	1.00115e-43
Gpr88	4.32525e-48	-0.867404	0.221	0.74	1.09995e-43
Mark1	5.22381e-48	-0.631294	0.179	0.701	1.32847e-43
Sh3pxd2a	5.37064e-48	-0.516404	0.056	0.395	1.36581e-43
D430036J16Rik	6.66294e-48	-0.434037	0.036	0.328	1.69445e-43
Dtnbos	7.58889e-48	-0.615691	0.106	0.531	1.92993e-43
Sntg1	1.31572e-47	-0.830397	0.917	0.966	3.34601e-43
Ralgps2	1.4099e-47	-0.647301	0.109	0.531	3.5855e-43
Syt16	1.77504e-47	-0.683215	0.173	0.655	4.51411e-43
Fat3	1.87672e-47	-0.786631	0.88	0.96	4.77269e-43
Slc35f3	3.72425e-47	-0.947471	0.65	0.927	9.47115e-43
Unc5c	4.70548e-47	1.33132	0.991	0.887	1.19665e-42
Pak6	5.24367e-47	-0.44959	0.05	0.373	1.33352e-42
Lmo3	8.33891e-47	-0.704643	0.164	0.655	2.12067e-42
Itga5	8.40358e-47	-0.357886	0.021	0.266	2.13712e-42
A430090L17Rik	8.42252e-47	-0.459764	0.037	0.328	2.14193e-42
Nr4a1	1.07131e-46	-0.477588	0.022	0.271	2.72444e-42
Adgrl1	1.07866e-46	-0.574297	0.107	0.531	2.74313e-42
Baz2b	1.74711e-46	1.134	0.985	0.859	4.44308e-42
Snap25	1.94315e-46	-0.786734	0.945	0.994	4.94162e-42
5730522E02Rik	2.1262e-46	-0.77253	0.851	0.949	5.40713e-42
Prkch	2.12774e-46	-0.659441	0.076	0.441	5.41105e-42
C2cd2l	2.38905e-46	-0.470056	0.071	0.441	6.07559e-42
Syt6	2.73216e-46	-0.580801	0.097	0.503	6.94816e-42
Gm16226	3.11192e-46	-0.415612	0.033	0.311	7.91393e-42
Rgs17	3.31642e-46	-0.656051	0.143	0.605	8.43399e-42
Tenm2	3.69646e-46	-1.2457	0.972	0.977	9.40047e-42
Slc12a5	5.06753e-46	-0.571046	0.174	0.678	1.28872e-41
Prkcb	5.13833e-46	-0.950516	0.925	0.983	1.30673e-41
Syngap1	5.2793e-46	-0.389943	0.036	0.322	1.34258e-41
Grm1	5.33991e-46	-1.14936	0.628	0.904	1.35799e-41
Arg2	5.5194e-46	-0.321793	0.023	0.277	1.40364e-41
Matk	6.07076e-46	-0.698718	0.194	0.684	1.54386e-41
Tiam2	6.74079e-46	-0.62229	0.111	0.531	1.71425e-41
Lrfn5	7.69923e-46	-0.810757	0.926	0.972	1.95799e-41
Trim9	7.70125e-46	-0.805128	0.302	0.791	1.95851e-41
Rora	7.85363e-46	-0.967905	0.981	1	1.99726e-41
Tmtc1	7.93613e-46	-0.87446	0.272	0.774	2.01824e-41
Cfap74	1.10359e-45	-0.354502	0.033	0.311	2.80654e-41
Doc2b	1.20619e-45	-0.464461	0.048	0.362	3.06747e-41
Abr	1.22102e-45	-0.598621	0.115	0.537	3.10517e-41
Chn1	1.46738e-45	-0.831941	0.782	0.96	3.73169e-41
Cxadr	2.1174e-45	-0.473079	0.056	0.384	5.38476e-41
Gm48749	2.3584e-45	-0.486904	0.036	0.316	5.99764e-41
Junb	2.38838e-45	-0.992491	0.051	0.362	6.07388e-41
Gm27032	2.58944e-45	-0.528053	0.127	0.576	6.5852e-41
Brinp1	3.91705e-45	-0.875266	0.82	0.938	9.96145e-41
Arpp19	6.15955e-45	-0.899674	0.313	0.836	1.56644e-40
Psd	9.3299e-45	-0.44585	0.06	0.395	2.37269e-40
Lin7a	1.11041e-44	-0.592596	0.11	0.531	2.82387e-40
Gm10629	1.16644e-44	-0.364091	0.021	0.26	2.96637e-40
Mast4	1.36107e-44	1.26443	0.985	0.955	3.46133e-40
Sptbn4	1.49598e-44	-0.789969	0.374	0.853	3.80443e-40
Shisa9	1.61894e-44	-0.931331	0.669	0.932	4.11712e-40
Arid3b	1.79244e-44	-0.451154	0.046	0.35	4.55836e-40
Adgrl3	1.85326e-44	-0.854388	0.976	0.994	4.71302e-40
Dbp	2.15504e-44	-0.563391	0.085	0.463	5.48047e-40
Serpine2	2.37975e-44	-0.787584	0.172	0.638	6.05194e-40
Ap1s1	2.70574e-44	-0.591578	0.13	0.576	6.88097e-40
Zfp536	2.74705e-44	1.23185	0.96	0.881	6.98602e-40
Zeb2	2.93834e-44	1.19831	0.99	0.91	7.4725e-40
Gm10115	3.06877e-44	-0.444428	0.038	0.322	7.80418e-40
Sgcz	4.57603e-44	-1.41241	0.97	0.966	1.16373e-39
Lmo7	5.37442e-44	-0.80957	0.451	0.893	1.36677e-39
Dlg4	5.73972e-44	-0.573711	0.096	0.486	1.45967e-39
Clstn3	5.88403e-44	-0.443492	0.063	0.407	1.49637e-39
B3gnt2	6.31446e-44	-0.659313	0.147	0.599	1.60583e-39
Dst	8.15883e-44	0.956909	0.998	0.989	2.07487e-39
Rhbdl3	8.46425e-44	-0.506135	0.064	0.401	2.15254e-39
Gm26658	9.91506e-44	-0.388711	0.023	0.266	2.5215e-39
Palm	1.00514e-43	-0.537162	0.08	0.441	2.55616e-39
Plxna2	1.14526e-43	-0.577024	0.147	0.605	2.91252e-39
4930598N05Rik	1.16523e-43	-0.392808	0.026	0.277	2.96329e-39
4930545L23Rik	1.1999e-43	-0.577816	0.056	0.373	3.05147e-39
Svop	1.26748e-43	-0.574309	0.096	0.486	3.22334e-39
Fnbp1l	1.34759e-43	-0.873085	0.626	0.927	3.42704e-39
Gipc2	1.41904e-43	-0.512774	0.049	0.35	3.60875e-39
Tmem191c	1.89077e-43	-0.792166	0.261	0.751	4.80841e-39
Foxg1	2.07622e-43	-0.476745	0.063	0.395	5.28004e-39
Crispld1	2.15608e-43	-0.36542	0.023	0.266	5.48314e-39
Ppp1r2	3.5762e-43	-0.810627	0.258	0.791	9.09464e-39
Gm37679	4.17629e-43	-0.423804	0.058	0.379	1.06207e-38
Gm17231	4.614e-43	-0.670455	0.085	0.446	1.17339e-38
AI593442	4.7588e-43	-0.529317	0.08	0.441	1.21021e-38
Rap1gap2	7.09739e-43	-0.510702	0.063	0.39	1.80494e-38
Mme	8.87195e-43	-0.603126	0.051	0.35	2.25623e-38
Drd2	8.98433e-43	-1.07549	0.079	0.418	2.2848e-38
Adgrb1	9.40891e-43	-0.637609	0.166	0.638	2.39278e-38
Add2	1.0391e-42	-0.825223	0.38	0.825	2.64255e-38
Hs6st2	1.18703e-42	-0.781835	0.219	0.695	3.01872e-38
Pknox2	1.21431e-42	-0.576201	0.066	0.395	3.0881e-38
Ulk4	1.53229e-42	-0.535825	0.116	0.531	3.89678e-38
Cap2	1.54696e-42	-0.786846	0.398	0.847	3.93408e-38
Rnf220	1.54987e-42	1.19724	0.979	0.927	3.94146e-38
Ppp3ca	1.74438e-42	-0.770506	1	1	4.43612e-38
Htr4	1.9174e-42	-0.665836	0.023	0.26	4.87614e-38
Gm42303	2.1799e-42	-0.404776	0.034	0.299	5.54372e-38
Ankrd28	2.37546e-42	1.0841	0.961	0.797	6.04102e-38
Smarca1	3.26443e-42	-0.522479	0.081	0.441	8.30177e-38
Wscd2	3.31099e-42	-0.660028	0.128	0.548	8.42017e-38
Gm44151	3.39234e-42	-0.462566	0.059	0.379	8.62707e-38
4930428E07Rik	3.87283e-42	-0.573391	0.053	0.356	9.849e-38
Egr3	4.03308e-42	-0.406758	0.028	0.277	1.02565e-37
Ntm	4.44056e-42	-1.39498	0.947	0.898	1.12928e-37
Spry2	4.48209e-42	-0.564157	0.095	0.475	1.13984e-37
Actl6b	5.39162e-42	-0.52085	0.07	0.407	1.37114e-37
Ksr2	6.19203e-42	-0.819812	0.434	0.847	1.5747e-37
Rgs11	6.5321e-42	-0.486249	0.048	0.345	1.66118e-37
Gm15155	6.84275e-42	-0.912538	0.344	0.808	1.74018e-37
Cntn6	7.14882e-42	-0.618623	0.197	0.678	1.81802e-37
Shisa7	7.93612e-42	-0.455317	0.073	0.418	2.01823e-37
Ddx5	7.9624e-42	0.858388	0.999	0.994	2.02492e-37
Stk32c	1.05388e-41	-0.510572	0.086	0.452	2.68011e-37
Shc3	1.2629e-41	-0.557098	0.067	0.395	3.21168e-37
St8sia3	1.2681e-41	-0.734819	0.204	0.689	3.2249e-37
Kcnj4	1.77169e-41	-0.412331	0.057	0.373	4.5056e-37
Mgat5b	1.77245e-41	-0.446967	0.06	0.379	4.50753e-37
Hivep2	1.78713e-41	-0.805801	0.892	0.966	4.54484e-37
Bcl11b	1.81991e-41	-0.915993	0.595	0.91	4.62821e-37
Ncan	1.94175e-41	-0.401849	0.043	0.328	4.93806e-37
Klhl1	1.97812e-41	-0.647145	0.1	0.48	5.03057e-37
Nhsl2	2.10303e-41	-0.581167	0.07	0.401	5.34821e-37
Icam5	2.54176e-41	-0.495743	0.081	0.435	6.46395e-37
Ivns1abp	2.97805e-41	-0.810516	0.3	0.814	7.57349e-37
Gm43192	3.03731e-41	-0.45056	0.042	0.322	7.72419e-37
Mmp17	3.11923e-41	-0.463986	0.055	0.362	7.93251e-37
Cdh20	3.51842e-41	1.43841	0.866	0.667	8.94768e-37
Synpo	3.71352e-41	-0.53327	0.107	0.503	9.44386e-37
Ano4	4.45295e-41	1.1813	0.97	0.859	1.13243e-36
Gm4258	7.17551e-41	1.14078	0.957	0.808	1.8248e-36
Klhl29	8.27938e-41	-0.783223	0.797	0.91	2.10553e-36
Adora2a	9.65177e-41	-0.791735	0.07	0.39	2.45454e-36
Armc9	1.04498e-40	-0.608057	0.194	0.684	2.65748e-36
Chrna7	1.05472e-40	-0.421958	0.05	0.345	2.68226e-36
Slc2a3	1.07759e-40	-0.53537	0.11	0.508	2.74043e-36
Kcnn2	1.52483e-40	-0.578555	0.118	0.52	3.8778e-36
Nmnat2	1.59075e-40	-0.557853	0.127	0.537	4.04544e-36
Tspear	1.83427e-40	-0.450707	0.027	0.266	4.66472e-36
Stk26	1.92347e-40	-0.438416	0.066	0.39	4.89159e-36
Prkcg	1.95008e-40	-0.482743	0.057	0.362	4.95925e-36
Kctd17	2.08425e-40	-0.792011	0.147	0.565	5.30045e-36
Camkk1	2.08526e-40	-0.312074	0.023	0.254	5.30301e-36
Dgkh	2.32221e-40	-0.861893	0.485	0.87	5.90562e-36
Aff3	2.68821e-40	-0.820477	0.762	0.966	6.8364e-36
Dzank1	2.95917e-40	-0.596236	0.18	0.65	7.52546e-36
Ophn1	3.17382e-40	-0.505745	0.117	0.52	8.07135e-36
Tmcc1	3.25359e-40	1.013	0.995	0.96	8.2742e-36
Tmem158	3.64122e-40	-0.816483	0.293	0.797	9.25998e-36
Kif1b	4.59623e-40	0.996051	0.998	0.955	1.16887e-35
Sv2b	5.50275e-40	-0.49206	0.073	0.407	1.39941e-35
Per1	5.84569e-40	-0.443288	0.038	0.305	1.48662e-35
Shank2	6.24124e-40	-0.493819	0.088	0.446	1.58721e-35
Arhgap18	6.79468e-40	-0.573711	0.081	0.424	1.72796e-35
Naaladl2	6.97961e-40	1.38327	0.963	0.808	1.77498e-35
Nup93	7.61053e-40	-0.672503	0.262	0.774	1.93543e-35
Rab40b	1.06637e-39	-0.585062	0.128	0.531	2.71188e-35
Hpgds	1.12612e-39	-0.388418	0.054	0.356	2.86383e-35
Tmtc2	1.1367e-39	1.36092	0.847	0.548	2.89075e-35
Synpo2	1.32441e-39	-0.42446	0.026	0.26	3.3681e-35
Syt14	1.3967e-39	-0.607362	0.172	0.627	3.55195e-35
Dusp14	1.45434e-39	-0.431305	0.028	0.266	3.69853e-35
Ccdc30	1.50256e-39	-0.458951	0.082	0.429	3.82116e-35
Rasl10b	1.64184e-39	-0.329734	0.032	0.282	4.17537e-35
A330049N07Rik	2.1253e-39	1.39042	0.799	0.441	5.40486e-35
Diras2	2.25102e-39	-0.399944	0.051	0.345	5.72456e-35
Cyfip2	2.36062e-39	-0.659731	0.268	0.78	6.00329e-35
Arhgap6	2.59659e-39	-0.677682	0.081	0.418	6.60338e-35
March4	2.8351e-39	-0.463026	0.053	0.345	7.20995e-35
Mir100hg	2.96061e-39	1.04436	0.996	0.927	7.52912e-35
Sptb	3.66311e-39	-0.488624	0.098	0.469	9.31566e-35
Slc1a1	3.9658e-39	-0.515529	0.087	0.435	1.00854e-34
Gm2164	4.32479e-39	-0.75076	0.125	0.514	1.09984e-34
Necab2	4.61956e-39	-0.497812	0.081	0.424	1.1748e-34
Hook1	1.02764e-38	-0.477787	0.109	0.497	2.61338e-34
Dlgap4	1.29007e-38	-0.550679	0.174	0.633	3.28077e-34
Plcl2	1.3461e-38	-0.800277	0.551	0.904	3.42327e-34
Nipal2	1.38385e-38	-0.476953	0.07	0.395	3.51927e-34
Slc7a8	1.5828e-38	-0.465187	0.064	0.373	4.02521e-34
Rnf180	1.64381e-38	-0.53162	0.072	0.395	4.18037e-34
Grb10	1.65925e-38	-0.488675	0.084	0.429	4.21963e-34
Tmem164	1.72001e-38	-0.485631	0.069	0.39	4.37415e-34
Gm20642	1.83283e-38	-0.607178	0.087	0.429	4.66107e-34
Phlpp1	1.90697e-38	0.961949	0.998	0.994	4.84962e-34
Tenm4	2.90032e-38	-0.593818	0.898	0.972	7.3758e-34
Dmtn	3.3354e-38	-0.549806	0.103	0.475	8.48225e-34
Rtn4rl1	3.37931e-38	-0.368853	0.034	0.282	8.59392e-34
Ghr	3.43177e-38	-0.554039	0.102	0.469	8.72733e-34
Cacna1h	4.87917e-38	-0.403786	0.056	0.35	1.24082e-33
Itgbl1	5.09192e-38	-0.486889	0.049	0.328	1.29493e-33
Ralyl	5.23379e-38	1.33591	0.986	0.701	1.33101e-33
Prkag2	6.27001e-38	-0.516622	0.086	0.429	1.59453e-33
Cers6	6.59913e-38	-0.520988	0.141	0.559	1.67822e-33
Gm42722	7.24686e-38	-0.415374	0.047	0.322	1.84295e-33
Sgpp2	8.17782e-38	-0.432933	0.035	0.282	2.0797e-33
Pkia	9.97937e-38	-0.580149	0.231	0.712	2.53785e-33
Gmpr	1.00772e-37	-0.412134	0.069	0.39	2.56274e-33
Sorbs1	1.18644e-37	-0.711481	0.783	0.944	3.01723e-33
Ptprd	1.19422e-37	0.712878	1	1	3.03703e-33
Sec14l1	1.21411e-37	-0.615434	0.164	0.605	3.0876e-33
Phyhip	1.24161e-37	-0.382268	0.047	0.322	3.15755e-33
Rnf150	1.27531e-37	-0.85496	0.516	0.853	3.24324e-33
Alcam	1.67579e-37	-0.835069	0.949	0.994	4.26169e-33
Dscaml1	1.7856e-37	1.10749	0.932	0.768	4.54095e-33
Ebf1	1.86716e-37	-0.773387	0.08	0.412	4.74837e-33
Epha7	1.97053e-37	-0.716697	0.237	0.684	5.01126e-33
Bcas1	2.42787e-37	1.15171	0.84	0.644	6.17432e-33
Gm48006	2.43493e-37	-0.334977	0.033	0.277	6.19226e-33
Sema3a	3.02522e-37	-0.62581	0.09	0.435	7.69343e-33
Cdc37l1	3.12382e-37	0.979489	0.978	0.915	7.9442e-33
Galntl6	7.72816e-37	-1.12206	0.94	0.932	1.96535e-32
Osbp2	9.21317e-37	-0.72915	0.312	0.819	2.343e-32
Nphp4	1.03366e-36	-0.376986	0.04	0.294	2.6287e-32
Rims1	1.24922e-36	-0.587621	0.919	0.938	3.17689e-32
Nrg2	1.31928e-36	-0.744623	0.432	0.847	3.35506e-32
Gad1	1.32495e-36	-0.564211	0.191	0.65	3.36949e-32
Cacng2	1.55563e-36	-0.410428	0.058	0.35	3.95611e-32
Strip2	1.63703e-36	-0.626306	0.093	0.435	4.16314e-32
Ptms	1.72218e-36	-0.643442	0.238	0.734	4.37969e-32
Gabrg2	1.83784e-36	-0.536458	0.129	0.525	4.67382e-32
Cit	1.84634e-36	-0.801053	0.521	0.859	4.69542e-32
Lgi1	1.86336e-36	-0.533736	0.156	0.582	4.73871e-32
Man2a1	1.92305e-36	-0.611571	0.136	0.531	4.89051e-32
Lrrc6	2.13664e-36	-0.328745	0.033	0.271	5.4337e-32
Hap1	2.24568e-36	-0.41135	0.058	0.35	5.71098e-32
Frmd6	2.26079e-36	-0.389999	0.036	0.282	5.74941e-32
Nrgn	2.43368e-36	-1.15788	0.815	0.921	6.18909e-32
Klhl3	2.98343e-36	-0.434853	0.077	0.401	7.58716e-32
Ndrg4	3.19673e-36	-0.750415	0.78	0.949	8.1296e-32
Cdh8	3.25594e-36	-0.914834	0.832	0.893	8.28019e-32
P2ry14	3.47415e-36	-0.528946	0.193	0.661	8.83511e-32
Prkd1	3.74124e-36	-0.906484	0.27	0.729	9.51435e-32
Ccnd2	4.03393e-36	-0.665902	0.075	0.384	1.02587e-31
Apod	4.30251e-36	1.2481	0.986	0.904	1.09417e-31
Pdp1	4.98926e-36	-0.524192	0.079	0.395	1.26882e-31
Ccsap	5.72996e-36	-0.414155	0.066	0.367	1.45719e-31
Mfap3l	7.36558e-36	-0.438953	0.071	0.379	1.87314e-31
Snhg11	7.7792e-36	-0.892663	0.999	1	1.97833e-31
Bicdl1	9.00261e-36	-0.41207	0.075	0.395	2.28945e-31
Lrrfip1	9.82513e-36	-0.485383	0.127	0.514	2.49863e-31
Galnt14	1.01418e-35	-0.418113	0.048	0.316	2.57917e-31
Inhba	1.12659e-35	-0.368015	0.039	0.288	2.86504e-31
Adgrb3	1.19313e-35	-0.78895	0.995	1	3.03425e-31
Coro2b	1.35515e-35	-0.473545	0.109	0.475	3.44627e-31
9530059O14Rik	1.58418e-35	-0.773062	0.927	0.989	4.02873e-31
Ptprr	2.06055e-35	-0.474834	0.075	0.39	5.24017e-31
A330015K06Rik	2.21666e-35	-0.832118	0.885	0.977	5.63719e-31
Ppp2r2b	2.69904e-35	-0.602061	0.886	0.944	6.86393e-31
Homer1	2.70007e-35	-0.94112	0.545	0.893	6.86656e-31
Ptprk	2.83896e-35	1.14356	0.823	0.588	7.21976e-31
Efna5	3.13713e-35	-0.642974	0.14	0.525	7.97802e-31
Myo3b	3.78594e-35	-0.609647	0.032	0.26	9.62803e-31
Foxp1	3.97052e-35	-0.75238	0.997	1	1.00974e-30
Gm48715	4.02482e-35	-0.31682	0.031	0.26	1.02355e-30
Bmp6	4.53329e-35	-0.368997	0.033	0.266	1.15286e-30
Mpp7	5.3092e-35	-0.575602	0.142	0.542	1.35018e-30
Tmem63c	6.8673e-35	-0.348009	0.055	0.333	1.74642e-30
Ccdc107	7.15424e-35	-0.49366	0.1	0.446	1.81939e-30
Npas3	7.50178e-35	1.20715	0.869	0.661	1.90778e-30
Ppp1r9a	7.6504e-35	-0.65478	0.967	1	1.94557e-30
Gm48747	8.23222e-35	-0.308494	0.03	0.254	2.09354e-30
Mirg	9.79676e-35	-0.454875	0.142	0.542	2.49141e-30
4930570B17Rik	1.11347e-34	-0.411233	0.065	0.362	2.83167e-30
Acaca	1.1224e-34	1.24165	0.826	0.633	2.85438e-30
Cdr1os	1.24352e-34	-0.566882	0.911	0.966	3.16241e-30
Dhx32	1.37665e-34	-0.471839	0.122	0.497	3.50097e-30
Nfia	1.64961e-34	1.16711	0.839	0.605	4.19513e-30
Gm16152	3.09943e-34	-0.369839	0.036	0.271	7.88215e-30
Plec	3.36604e-34	-0.370257	0.039	0.282	8.56019e-30
Rapgef4os1	3.47143e-34	-0.415374	0.046	0.299	8.82818e-30
Gm8098	4.15854e-34	-0.409433	0.063	0.35	1.05756e-29
Ric8b	4.3594e-34	-0.755058	0.499	0.898	1.10864e-29
Lin7b	4.6617e-34	-0.486861	0.081	0.395	1.18552e-29
Syt4	4.69376e-34	-0.552853	0.115	0.475	1.19367e-29
Cep126	4.90441e-34	-0.610398	0.157	0.559	1.24724e-29
Gda	5.24464e-34	-0.506611	0.107	0.463	1.33376e-29
Agfg2	5.30232e-34	-0.467006	0.085	0.407	1.34843e-29
Ccdc88a	5.96237e-34	0.92075	0.971	0.819	1.51629e-29
Nlgn1	6.91252e-34	-0.811024	0.996	1	1.75792e-29
Glce	8.15424e-34	-0.482314	0.094	0.424	2.0737e-29
Lmtk2	8.92608e-34	-0.514435	0.262	0.774	2.26999e-29
Madd	1.0808e-33	-0.464742	0.1	0.441	2.74859e-29
Rab3c	1.4684e-33	-0.72932	0.326	0.757	3.73429e-29
Rundc3b	1.47559e-33	-0.505005	0.194	0.644	3.75257e-29
Ica1l	1.67111e-33	-0.38505	0.074	0.379	4.2498e-29
Tpm1	1.83673e-33	-0.707957	0.283	0.751	4.671e-29
Gm11817	2.04158e-33	-0.417315	0.047	0.299	5.19195e-29
Cdh10	2.18268e-33	1.10795	0.96	0.797	5.55078e-29
Stx1b	2.41067e-33	-0.412134	0.075	0.379	6.13057e-29
Grasp	2.52877e-33	-0.403786	0.053	0.316	6.43092e-29
Cacna1a	2.58712e-33	-0.58933	0.925	0.96	6.57931e-29
Gabra2	2.64248e-33	-0.626315	0.75	0.944	6.72009e-29
Lmo4	2.69746e-33	-0.547106	0.142	0.525	6.85991e-29
Jcad	2.73934e-33	-0.516534	0.089	0.407	6.96643e-29
Gpr6	3.09821e-33	-0.448003	0.041	0.282	7.87905e-29
Etv5	3.31955e-33	-0.341444	0.036	0.266	8.44195e-29
Prkce	3.53562e-33	-0.591404	0.872	0.977	8.99144e-29
Cdh12	3.55676e-33	-0.531733	0.128	0.503	9.04519e-29
B830012L14Rik	4.02959e-33	-0.478453	0.138	0.52	1.02477e-28
Plekhg5	4.18523e-33	-0.35726	0.043	0.288	1.06435e-28
Scn2b	5.22082e-33	-0.391768	0.076	0.384	1.32771e-28
Tro	5.2894e-33	-0.458139	0.127	0.503	1.34515e-28
Kif21a	6.54789e-33	0.830745	0.991	0.96	1.66519e-28
Trerf1	8.06556e-33	-0.664653	0.661	0.921	2.05115e-28
Fcho1	8.09784e-33	-0.377724	0.077	0.384	2.05936e-28
Foxo1	8.18289e-33	-0.718835	0.203	0.616	2.08099e-28
Gm3764	8.33648e-33	-0.434874	0.058	0.328	2.12005e-28
St6galnac3	9.1909e-33	0.972666	0.979	0.921	2.33734e-28
Trf	1.22392e-32	0.996515	0.973	0.938	3.11255e-28
Gad2	1.30821e-32	-0.566374	0.263	0.723	3.32691e-28
L1cam	1.56436e-32	-0.360542	0.05	0.305	3.97832e-28
Jazf1	1.68535e-32	-0.485985	0.184	0.605	4.28602e-28
Pianp	1.74363e-32	-0.402847	0.063	0.345	4.43423e-28
Lrrc3b	1.82339e-32	-0.407639	0.046	0.294	4.63705e-28
Cnnm1	1.85052e-32	-0.43509	0.073	0.367	4.70606e-28
Gm3294	2.15366e-32	-0.331637	0.042	0.282	5.47697e-28
Rgl1	2.34391e-32	-0.47002	0.104	0.441	5.9608e-28
Cntnap1	2.34638e-32	-0.378286	0.044	0.288	5.96709e-28
A830018L16Rik	2.42137e-32	-0.750871	0.272	0.678	6.1578e-28
Agap2	2.42453e-32	-0.423264	0.073	0.367	6.16582e-28
Trnp1	3.3458e-32	-0.466581	0.075	0.367	8.50871e-28
Fam102b	3.56607e-32	-0.424119	0.074	0.367	9.06888e-28
C030017B01Rik	4.04223e-32	-0.340274	0.044	0.288	1.02798e-27
Tbc1d5	4.74585e-32	0.877204	0.986	0.91	1.20692e-27
Ptchd1	4.7869e-32	-0.405681	0.061	0.333	1.21736e-27
Flrt2	4.84133e-32	-0.621553	0.111	0.446	1.2312e-27
AC149090.1	5.94668e-32	-0.806683	0.979	0.989	1.5123e-27
Hmgcll1	7.09666e-32	-0.51668	0.187	0.616	1.80475e-27
Runx1t1	7.47407e-32	-0.700318	0.647	0.898	1.90073e-27
4430402I18Rik	7.56987e-32	-0.364867	0.081	0.39	1.92509e-27
Id4	7.66757e-32	-0.48966	0.07	0.356	1.94994e-27
Map4k4	8.00884e-32	1.00272	0.816	0.65	2.03673e-27
Uggt2	8.25351e-32	-0.519325	0.173	0.588	2.09895e-27
Eno2	8.91864e-32	-0.512311	0.152	0.548	2.2681e-27
Tmem179	8.94922e-32	-0.330295	0.048	0.299	2.27588e-27
6530403H02Rik	1.02789e-31	-0.85288	0.443	0.808	2.61403e-27
Dgkz	1.05539e-31	-0.465409	0.097	0.424	2.68397e-27
Mn1	1.1244e-31	-0.318897	0.036	0.26	2.85945e-27
Man1a	1.1747e-31	-0.687922	0.223	0.661	2.98739e-27
Dagla	1.19055e-31	-0.338176	0.057	0.322	3.0277e-27
Dnm1	1.33357e-31	-0.439946	0.169	0.582	3.39141e-27
Pdzrn4	1.33432e-31	-0.516467	0.1	0.435	3.39332e-27
Cyp46a1	1.36179e-31	-0.467917	0.093	0.407	3.46318e-27
Vat1l	1.3635e-31	-0.511904	0.062	0.333	3.46752e-27
Macrod2os1	1.44842e-31	-0.416594	0.081	0.384	3.68347e-27
D130043K22Rik	1.48244e-31	-0.408454	0.068	0.35	3.77001e-27
Rgs8	1.4965e-31	-0.412331	0.06	0.328	3.80576e-27
Unc13c	1.5724e-31	-0.994102	0.626	0.853	3.99877e-27
Negr1	1.76398e-31	-0.722192	0.994	1	4.48598e-27
Smarcd3	1.82658e-31	-0.379664	0.083	0.39	4.64518e-27
Mob3b	2.07272e-31	1.22528	0.658	0.249	5.27113e-27
Gm38251	2.10294e-31	-0.412298	0.063	0.333	5.34799e-27
Stxbp5l	2.53606e-31	-0.553217	0.883	0.96	6.44947e-27
Dlx6os1	2.84598e-31	-0.396233	0.062	0.333	7.23762e-27
Gm15261	2.95064e-31	-0.464461	0.045	0.282	7.50377e-27
Gucy1a1	3.62857e-31	-0.573999	0.107	0.435	9.22783e-27
Prr7	3.83021e-31	-0.439823	0.107	0.441	9.7406e-27
Rapgef4	4.13869e-31	-0.674844	0.692	0.898	1.05251e-26
Rtl1	4.31876e-31	-0.301765	0.047	0.294	1.0983e-26
Rasgef1b	5.25076e-31	-0.749724	0.707	0.893	1.33532e-26
Shtn1	5.70228e-31	0.888612	0.935	0.791	1.45015e-26
Susd4	6.55122e-31	-0.429419	0.077	0.367	1.66604e-26
Plppr4	7.14198e-31	-0.695724	0.446	0.853	1.81628e-26
Kcnk1	1.00594e-30	-0.375488	0.047	0.288	2.5582e-26
Dact2	1.00877e-30	-0.379358	0.048	0.288	2.56541e-26
Gm2415	1.05208e-30	-0.30328	0.042	0.277	2.67555e-26
Uxs1	1.11177e-30	-0.497533	0.131	0.492	2.82733e-26
Slc7a14	1.14249e-30	-0.444736	0.081	0.373	2.90546e-26
Flrt3	1.14357e-30	-0.479542	0.133	0.497	2.90821e-26
Syngr3	1.16658e-30	-0.447603	0.084	0.384	2.96673e-26
Nefm	1.17359e-30	-0.333884	0.038	0.266	2.98455e-26
Grid2	1.19271e-30	0.716276	1	1	3.03317e-26
Akap5	1.24469e-30	-0.431557	0.091	0.401	3.16536e-26
Atrnl1	1.50545e-30	-0.672638	0.577	0.87	3.8285e-26
Dock9	1.52246e-30	1.05173	0.829	0.695	3.87176e-26
Snhg14	1.68912e-30	-0.559589	0.954	0.977	4.29559e-26
Ppargc1a	1.69293e-30	-0.474176	0.07	0.35	4.30529e-26
Kif27	1.79165e-30	-0.309299	0.038	0.26	4.55634e-26
Noct	1.79574e-30	-0.320579	0.039	0.266	4.56676e-26
Drp2	2.20558e-30	-0.312219	0.051	0.299	5.60902e-26
Elk3	2.4203e-30	-0.362648	0.05	0.294	6.15507e-26
Smad3	2.56283e-30	-0.383109	0.068	0.345	6.51753e-26
Gabrb1	2.6707e-30	-0.558509	0.886	0.915	6.79186e-26
Mir124a-1hg	2.95485e-30	-0.555068	0.282	0.718	7.51448e-26
Cacna2d2	2.98587e-30	-0.44307	0.088	0.39	7.59335e-26
Asic1	2.98799e-30	-0.359754	0.054	0.305	7.59875e-26
Gucy1b1	3.00181e-30	-0.494416	0.174	0.576	7.6339e-26
Sema6d	3.17625e-30	1.00912	0.96	0.751	8.07752e-26
Dnmbp	3.22124e-30	-0.367114	0.056	0.311	8.19194e-26
Lrrn2	3.43286e-30	-0.411009	0.085	0.39	8.73011e-26
Gng7	3.75191e-30	-0.649892	0.636	0.966	9.54148e-26
Mok	4.06071e-30	-0.379285	0.068	0.345	1.03268e-25
Pced1b	4.1114e-30	-0.41138	0.054	0.305	1.04557e-25
Gm10649	4.36415e-30	-0.386369	0.053	0.299	1.10985e-25
1700109K24Rik	6.46569e-30	-0.361065	0.059	0.316	1.64429e-25
Kcnh5	6.54083e-30	-0.376269	0.06	0.322	1.6634e-25
Rab34	6.74447e-30	-0.402855	0.078	0.362	1.71519e-25
Ptprn	6.93144e-30	-0.668062	0.433	0.842	1.76273e-25
Bhlhb9	7.56509e-30	-0.425813	0.082	0.373	1.92388e-25
Ptpn1	8.01686e-30	-0.490971	0.185	0.593	2.03877e-25
Fam131a	8.06739e-30	-0.423736	0.089	0.39	2.05162e-25
Wnk1	8.2955e-30	0.865177	0.972	0.831	2.10963e-25
S100pbp	8.39808e-30	-0.532845	0.172	0.565	2.13572e-25
Nfatc2	8.39907e-30	-0.321895	0.046	0.282	2.13597e-25
Osbpl3	8.97533e-30	-0.401872	0.056	0.305	2.28252e-25
Map2k6	9.84232e-30	-0.490222	0.08	0.367	2.503e-25
Fstl5	1.10958e-29	-0.477958	0.108	0.435	2.82177e-25
Fam171a2	1.2456e-29	-0.334859	0.043	0.271	3.16767e-25
Sntg2	1.52481e-29	-0.433085	0.045	0.277	3.87775e-25
Rere	1.7732e-29	0.818606	0.995	0.944	4.50943e-25
Gria2	1.8845e-29	-0.608127	0.981	0.994	4.79246e-25
Actr3b	2.14741e-29	-0.454037	0.132	0.486	5.46108e-25
Fry	2.20532e-29	-0.538704	0.924	0.983	5.60835e-25
Asph	2.24779e-29	-0.435754	0.125	0.475	5.71636e-25
Cenpv	2.34356e-29	-0.450982	0.11	0.441	5.95992e-25
Rbm24	2.55455e-29	-0.444276	0.086	0.379	6.49647e-25
Col25a1	3.08802e-29	-0.543866	0.079	0.362	7.85313e-25
March11	3.96583e-29	-0.410508	0.051	0.288	1.00855e-24
Sun2	4.06239e-29	-0.435416	0.086	0.379	1.03311e-24
Zfp831	4.37052e-29	-0.296571	0.046	0.277	1.11147e-24
Kcnn3	4.81409e-29	-0.416792	0.078	0.356	1.22427e-24
Dip2b	5.07099e-29	0.865605	0.967	0.915	1.2896e-24
Stx3	5.17123e-29	-0.354231	0.068	0.339	1.31509e-24
Tnik	5.28675e-29	-0.584902	0.946	0.994	1.34447e-24
Rims2	5.80256e-29	-0.59462	0.972	0.989	1.47565e-24
Slc6a17	6.02246e-29	-0.405644	0.069	0.339	1.53157e-24
Pdlim7	6.22897e-29	-0.43056	0.113	0.441	1.58409e-24
Neurl1a	6.47609e-29	-0.367114	0.061	0.316	1.64693e-24
Clvs2	6.79871e-29	-0.388836	0.071	0.345	1.72898e-24
Susd1	8.5777e-29	-0.395258	0.064	0.322	2.1814e-24
Egfem1	8.83997e-29	-1.09045	0.347	0.695	2.24809e-24
Tubb4a	1.09911e-28	0.770322	0.974	0.977	2.79514e-24
Cacna1i	1.1851e-28	-0.383487	0.056	0.299	3.01382e-24
Spats2	1.35119e-28	-0.368492	0.063	0.322	3.43622e-24
Fam135b	1.59662e-28	-0.579402	0.277	0.689	4.06035e-24
Mapt	1.99667e-28	0.739348	0.994	0.994	5.07774e-24
Pifo	2.27786e-28	-0.344162	0.046	0.271	5.79282e-24
Stxbp1	2.44433e-28	-0.506496	0.179	0.565	6.21618e-24
Vcl	2.6657e-28	-0.443679	0.09	0.384	6.77914e-24
Rnf112	2.85765e-28	-0.531689	0.174	0.554	7.26729e-24
Evl	2.88731e-28	-0.458512	0.145	0.503	7.34272e-24
Pcnx2	2.90018e-28	-0.440529	0.117	0.446	7.37545e-24
App	2.99394e-28	0.64557	0.999	0.994	7.61389e-24
Nrg3os	3.0787e-28	-0.627014	0.149	0.48	7.82944e-24
Adarb1	3.52096e-28	-0.438296	0.096	0.395	8.95415e-24
Nell1	4.7222e-28	-0.571581	0.061	0.311	1.2009e-23
A530046M15Rik	6.0662e-28	-0.36458	0.048	0.277	1.5427e-23
Pde8b	6.21732e-28	-0.626021	0.625	0.87	1.58113e-23
Rgs7	7.5072e-28	-0.563208	0.799	0.898	1.90916e-23
Cntnap5b	8.1386e-28	-0.739193	0.393	0.763	2.06973e-23
Nol4	8.23865e-28	-0.54122	0.214	0.599	2.09517e-23
Rian	9.10766e-28	-0.500643	0.91	0.932	2.31617e-23
Hs3st4	9.29457e-28	-0.845285	0.46	0.768	2.3637e-23
Scn3b	1.03971e-27	-0.442637	0.094	0.39	2.64408e-23
Arrb1	1.07248e-27	-0.327393	0.051	0.282	2.72743e-23
Rab6b	1.07715e-27	-0.517381	0.275	0.734	2.7393e-23
Snca	1.09366e-27	-0.608932	0.32	0.746	2.78128e-23
Tmem47	1.18981e-27	-0.351005	0.06	0.311	3.02581e-23
1700047M11Rik	1.27548e-27	0.92414	0.838	0.684	3.24367e-23
Slc16a11	1.34998e-27	-0.378492	0.053	0.288	3.43314e-23
Shfl	1.58714e-27	-0.340092	0.057	0.299	4.03625e-23
Sec14l5	1.6653e-27	0.98503	0.824	0.633	4.23502e-23
Htr1f	1.71072e-27	-0.686801	0.116	0.429	4.35054e-23
Fndc3b	1.88364e-27	-0.489747	0.201	0.61	4.7903e-23
Mir99ahg	2.12929e-27	0.933911	0.951	0.734	5.41501e-23
Rab15	2.42052e-27	-0.377739	0.058	0.299	6.15563e-23
Trrap	2.4293e-27	-0.471395	0.182	0.571	6.17795e-23
Dtnb	2.5322e-27	-0.566446	0.819	0.938	6.43964e-23
Zdhhc18	2.55743e-27	-0.386508	0.058	0.299	6.50381e-23
Galc	2.56539e-27	-0.409042	0.111	0.429	6.52404e-23
Dchs2	2.8022e-27	-0.41321	0.06	0.305	7.12626e-23
Pop5	3.01311e-27	-0.397473	0.095	0.39	7.66263e-23
Srrt	3.02904e-27	-0.485425	0.15	0.503	7.70316e-23
Chst1	3.25054e-27	-0.421576	0.095	0.39	8.26645e-23
Chgb	3.27009e-27	-0.472991	0.082	0.356	8.31618e-23
Usp2	3.34129e-27	-0.451853	0.132	0.469	8.49723e-23
Setd4	3.60534e-27	-0.477787	0.135	0.469	9.16874e-23
Bcl11a	3.62781e-27	-0.562913	0.305	0.718	9.22589e-23
Camk1d	3.91514e-27	-0.627659	0.948	0.989	9.95659e-23
Dlg2	4.11313e-27	-0.528138	1	1	1.04601e-22
Mag	4.95703e-27	0.820638	0.913	0.881	1.26062e-22
Gulp1	5.05415e-27	-0.561055	0.085	0.362	1.28532e-22
A230009B12Rik	5.12342e-27	-0.386913	0.066	0.322	1.30294e-22
Elmo1	5.30204e-27	0.804298	0.996	0.966	1.34836e-22
Sesn3	5.63393e-27	-0.553649	0.327	0.774	1.43276e-22
Rprml	5.69722e-27	-0.364717	0.075	0.345	1.44886e-22
Chrm3	5.90508e-27	-0.754635	0.073	0.333	1.50172e-22
C1qtnf12	6.54662e-27	-0.339228	0.062	0.311	1.66487e-22
Ptk2	6.9111e-27	0.786246	0.974	0.921	1.75756e-22
Syne1	7.1375e-27	-0.577954	0.948	0.994	1.81514e-22
Fbxo41	7.42522e-27	-0.327991	0.065	0.316	1.88831e-22
Six3	7.78474e-27	-0.348235	0.054	0.288	1.97974e-22
Pkp4	8.26556e-27	0.900744	0.865	0.729	2.10202e-22
Zfp46	9.22656e-27	-0.424471	0.121	0.441	2.34641e-22
Sorcs1	1.13241e-26	0.864347	0.993	0.966	2.87983e-22
Iqsec2	1.19782e-26	-0.446555	0.12	0.441	3.04617e-22
Pfkp	1.3071e-26	-0.435915	0.107	0.412	3.32408e-22
Brinp2	1.35136e-26	-0.44585	0.06	0.299	3.43663e-22
4930547E14Rik	1.73651e-26	-0.286364	0.046	0.266	4.41611e-22
Myo6	1.78062e-26	0.946802	0.829	0.718	4.52831e-22
Cacna1b	1.84687e-26	-0.49293	0.22	0.605	4.69677e-22
Ttc9b	1.99697e-26	-0.325462	0.046	0.266	5.07849e-22
Ntrk2	1.99717e-26	-0.811824	0.686	0.864	5.079e-22
Nptn	3.11274e-26	-0.552016	0.931	0.972	7.916e-22
Cacng8	3.14385e-26	-0.317159	0.057	0.294	7.99514e-22
Ppp2r3a	3.50908e-26	0.868702	0.915	0.78	8.92395e-22
Cep19	3.69462e-26	-0.406431	0.106	0.407	9.3958e-22
Srsf9	3.80089e-26	-0.362446	0.092	0.379	9.66604e-22
Slc4a3	3.82352e-26	-0.555651	0.333	0.729	9.72358e-22
Mir670hg	3.84347e-26	-0.445688	0.059	0.294	9.77432e-22
Vgf	3.9607e-26	-0.38577	0.059	0.299	1.00725e-21
Cep70	4.08049e-26	-0.481323	0.219	0.627	1.03771e-21
Dlgap1	5.01738e-26	-0.637263	0.91	0.921	1.27597e-21
Mir9-3hg	5.23844e-26	-0.38582	0.093	0.379	1.33219e-21
Atp8a1	5.30349e-26	0.673353	0.994	0.994	1.34873e-21
Gm15813	5.57153e-26	-0.402847	0.07	0.322	1.4169e-21
Slc25a33	6.31031e-26	-0.308196	0.055	0.288	1.60477e-21
Dclk2	6.51522e-26	-0.461988	0.203	0.593	1.65689e-21
Cdh7	6.54814e-26	-0.458928	0.085	0.356	1.66526e-21
Hipk2	6.98914e-26	0.960961	0.786	0.627	1.77741e-21
Plppr3	8.44564e-26	-0.28638	0.051	0.277	2.14781e-21
Il34	9.2812e-26	-0.304808	0.046	0.26	2.3603e-21
Gphn	9.57778e-26	0.663328	0.999	1	2.43573e-21
Usp29	9.93936e-26	-0.695122	0.391	0.751	2.52768e-21
Sh3d19	1.09764e-25	0.95098	0.763	0.537	2.7914e-21
Lin28b	1.30572e-25	-0.410256	0.15	0.497	3.32057e-21
Myo16	1.3478e-25	-0.373119	0.078	0.339	3.42759e-21
Cacna1d	1.46944e-25	-0.540517	0.767	0.881	3.73693e-21
Gm38575	1.80422e-25	-0.332443	0.059	0.294	4.5883e-21
Adgrl2	1.97404e-25	-0.555232	0.287	0.672	5.02019e-21
Mgat4b	2.02049e-25	-0.353031	0.086	0.362	5.1383e-21
Lmtk3	2.21399e-25	-0.33464	0.1	0.395	5.6304e-21
Exoc6b	2.45188e-25	0.783783	0.989	0.876	6.23538e-21
Rab26	2.49741e-25	-0.304665	0.048	0.266	6.35116e-21
Lrrc40	2.60461e-25	-0.358783	0.11	0.412	6.62379e-21
Syt5	2.62488e-25	-0.39555	0.09	0.362	6.67533e-21
Pxdn	2.91817e-25	-0.386713	0.104	0.395	7.42119e-21
Enc1	2.9286e-25	-0.306041	0.048	0.266	7.44772e-21
Hectd2	3.31371e-25	-0.261801	0.044	0.254	8.4271e-21
Dipk1a	3.36598e-25	-0.389711	0.104	0.401	8.56002e-21
Filip1	3.46498e-25	-0.406329	0.13	0.452	8.81179e-21
Dgat2	3.58068e-25	-0.345572	0.086	0.362	9.10603e-21
Cntnap5c	4.04443e-25	-0.375613	0.07	0.322	1.02854e-20
Ppp3r1	4.57744e-25	-0.502233	0.186	0.554	1.16409e-20
E430024P14Rik	4.61771e-25	-0.318986	0.045	0.254	1.17433e-20
Gm15738	4.8159e-25	-0.555789	0.396	0.814	1.22473e-20
Syn3	5.14764e-25	-0.524824	0.327	0.751	1.3091e-20
Arl3	5.89429e-25	-0.477084	0.238	0.655	1.49898e-20
Asic2	6.05816e-25	-0.72066	0.878	0.842	1.54065e-20
Scn1b	6.27214e-25	-0.364717	0.078	0.339	1.59507e-20
Arhgef3	6.56965e-25	-0.432202	0.114	0.412	1.67073e-20
Nmt2	6.66688e-25	-0.390847	0.159	0.514	1.69545e-20
Lingo1	6.93564e-25	-0.360803	0.065	0.305	1.7638e-20
Pigk	6.94724e-25	-0.584563	0.285	0.678	1.76675e-20
Rbms1	7.23167e-25	-0.652926	0.49	0.814	1.83908e-20
Limch1	7.3969e-25	0.767957	0.98	0.921	1.88111e-20
Znrf1	7.43351e-25	-0.618223	0.318	0.734	1.89042e-20
Ccdc6	9.505e-25	-0.335118	0.096	0.379	2.41722e-20
Csmd3	1.04564e-24	0.583351	1	1	2.65918e-20
Rgs2	1.05538e-24	-0.377418	0.068	0.311	2.68394e-20
Arel1	1.15767e-24	-0.498133	0.199	0.565	2.94408e-20
Khdrbs2	1.15827e-24	-0.568866	0.162	0.497	2.9456e-20
Radil	1.32697e-24	-0.333965	0.062	0.294	3.37461e-20
Gm10125	1.34458e-24	-0.359168	0.088	0.362	3.41939e-20
Tgfbr3	1.36867e-24	-0.425339	0.11	0.407	3.48066e-20
Ptprg	1.42982e-24	-0.533422	0.147	0.469	3.63617e-20
Carmil1	1.60916e-24	-0.374713	0.096	0.373	4.09226e-20
Ptpro	1.62281e-24	-0.392213	0.089	0.362	4.12697e-20
Plppr1	1.92557e-24	-0.667884	0.622	0.859	4.89692e-20
Dclk3	1.96172e-24	-0.385981	0.075	0.322	4.98884e-20
Grm8	2.04806e-24	-0.783929	0.243	0.593	5.20842e-20
Tmem91	2.46026e-24	-0.367511	0.152	0.497	6.25668e-20
Rnf165	2.58225e-24	-0.333303	0.067	0.305	6.56691e-20
Rmnd5b	2.7803e-24	-0.307759	0.087	0.356	7.07058e-20
Wnk2	2.85144e-24	-0.357033	0.078	0.333	7.25151e-20
Lrp1	3.18396e-24	-0.341475	0.09	0.362	8.09712e-20
Fgf12	3.52025e-24	-0.547421	0.962	0.977	8.95234e-20
Nucb2	3.95676e-24	-0.351319	0.11	0.401	1.00624e-19
Rap1a	4.10784e-24	0.972162	0.733	0.565	1.04466e-19
Arhgap23	4.47008e-24	0.82149	0.851	0.797	1.13679e-19
Cnnm2	4.65164e-24	-0.468327	0.169	0.514	1.18296e-19
Sacs	5.07782e-24	-0.353417	0.096	0.373	1.29134e-19
Sdc2	5.11129e-24	-0.39635	0.073	0.316	1.29985e-19
Fmnl2	5.24457e-24	1.02757	0.766	0.627	1.33375e-19
Snx10	5.56146e-24	-0.362914	0.094	0.367	1.41434e-19
Me3	5.8713e-24	-0.557311	0.638	0.881	1.49313e-19
Hras	5.92407e-24	-0.456479	0.159	0.508	1.50655e-19
Jph3	5.93124e-24	-0.26705	0.053	0.271	1.50837e-19
Efnb2	6.73093e-24	-0.395704	0.095	0.367	1.71174e-19
Trak1	6.91451e-24	-0.348504	0.095	0.367	1.75843e-19
Dnajc2	6.91512e-24	-0.378973	0.112	0.407	1.75858e-19
Pcgf5	7.02062e-24	-0.437795	0.095	0.367	1.78541e-19
Mras	8.20904e-24	-0.348345	0.083	0.339	2.08764e-19
Arf3	8.40346e-24	-0.44059	0.16	0.503	2.13708e-19
Magi1	9.45951e-24	0.793751	0.906	0.746	2.40565e-19
3110039M20Rik	1.00843e-23	-0.318056	0.077	0.328	2.56455e-19
Grm7	1.09412e-23	-0.673385	0.984	0.989	2.78246e-19
Rab36	1.10195e-23	-0.284979	0.056	0.277	2.80237e-19
Gm16126	1.11937e-23	-0.264929	0.047	0.254	2.84666e-19
Cap1	1.15602e-23	-0.454561	0.234	0.638	2.93987e-19
Usp3	1.23578e-23	-0.428877	0.239	0.655	3.14272e-19
Ctnnd2	1.42203e-23	-0.489733	0.985	1	3.61636e-19
Thbs3	1.42662e-23	-0.305448	0.069	0.311	3.62803e-19
Agap1	1.43696e-23	0.723815	0.97	0.864	3.65434e-19
Lpl	1.47132e-23	-0.309718	0.05	0.26	3.74172e-19
Cnih2	1.50064e-23	-0.356481	0.082	0.339	3.81628e-19
Glp2r	1.50812e-23	-0.33228	0.078	0.328	3.83529e-19
Bmerb1	1.51397e-23	-0.372648	0.12	0.424	3.85019e-19
Tspan13	1.66601e-23	-0.393951	0.099	0.373	4.23684e-19
Qk	1.68284e-23	0.697205	0.999	0.994	4.27963e-19
Fam20c	1.85402e-23	-0.281741	0.066	0.305	4.71495e-19
R3hdm4	1.97477e-23	-0.354033	0.115	0.412	5.02203e-19
Sirpa	2.01546e-23	-0.380209	0.094	0.362	5.1255e-19
Arhgap33	2.21762e-23	-0.363287	0.144	0.475	5.63964e-19
Pkig	2.41647e-23	-0.47142	0.24	0.638	6.14533e-19
Sncaip	2.51207e-23	-0.348128	0.068	0.305	6.38845e-19
Ago4	2.76807e-23	-0.39217	0.1	0.373	7.03947e-19
Myo1d	2.87918e-23	0.955083	0.748	0.542	7.32204e-19
Cebpz	3.73427e-23	-0.436312	0.176	0.52	9.49663e-19
Pip5k1a	4.01549e-23	-0.382156	0.233	0.65	1.02118e-18
Kirrel3	4.21236e-23	-0.858766	0.955	0.938	1.07125e-18
Slc16a2	4.29068e-23	-0.378994	0.062	0.282	1.09116e-18
Ssh2	4.59833e-23	0.776522	0.952	0.842	1.1694e-18
Wdr78	4.8528e-23	-0.329886	0.065	0.294	1.23412e-18
Atp6ap1l	5.28349e-23	-0.32037	0.053	0.266	1.34364e-18
Glt1d1	5.38486e-23	-0.352401	0.105	0.384	1.36942e-18
Phldb1	5.60106e-23	0.798005	0.806	0.661	1.4244e-18
Arfgef3	5.87094e-23	-0.38628	0.208	0.588	1.49304e-18
Chrm1	6.00218e-23	-0.275709	0.049	0.254	1.52641e-18
Kifc2	6.10985e-23	-0.346669	0.104	0.384	1.5538e-18
Rap2b	6.36327e-23	-0.309935	0.079	0.328	1.61824e-18
Nyap2	6.98204e-23	-0.554939	0.302	0.661	1.7756e-18
Ckmt1	7.60565e-23	-0.301838	0.064	0.294	1.93419e-18
Chd3	7.97242e-23	-0.371328	0.159	0.497	2.02747e-18
Prkn	9.02327e-23	0.773123	0.996	0.966	2.29471e-18
Gm15563	1.00845e-22	-0.324019	0.107	0.39	2.5646e-18
P4ha1	1.04032e-22	-0.518429	0.252	0.65	2.64564e-18
Phc2	1.04898e-22	-0.510305	0.453	0.893	2.66765e-18
Aig1	1.05749e-22	0.766258	0.91	0.785	2.68931e-18
Ctdspl	1.0582e-22	-0.434774	0.327	0.774	2.6911e-18
Maml3	1.14549e-22	-0.483779	0.131	0.429	2.9131e-18
Tmem38a	1.3261e-22	-0.416866	0.118	0.401	3.3724e-18
Strn	1.40338e-22	-0.689547	0.789	0.944	3.56893e-18
Cplx1	1.45233e-22	-0.289258	0.061	0.282	3.69342e-18
Map7	1.49895e-22	0.686849	0.989	0.966	3.81198e-18
Cntnap5a	1.53344e-22	-0.822144	0.779	0.825	3.8997e-18
Plekhg1	1.66306e-22	0.941646	0.739	0.554	4.22933e-18
Trim37	1.75865e-22	-0.406185	0.165	0.503	4.47242e-18
Slc6a6	1.77723e-22	-0.609313	0.642	0.938	4.51968e-18
Cep112	1.78305e-22	-0.353663	0.096	0.367	4.53448e-18
Catspere2	1.79669e-22	-0.40461	0.14	0.452	4.56915e-18
Pfkm	1.86399e-22	-0.309738	0.065	0.294	4.74031e-18
Luzp2	2.18495e-22	1.21788	0.537	0.169	5.55655e-18
Arhgef4	2.27786e-22	-0.264756	0.054	0.266	5.79282e-18
Frmd4b	2.36198e-22	0.725935	0.979	0.944	6.00676e-18
Adcy9	2.52482e-22	-0.443332	0.28	0.706	6.42088e-18
Cdc42bpa	2.64258e-22	0.666092	0.996	0.972	6.72034e-18
Xpr1	2.83034e-22	-0.396184	0.267	0.695	7.19784e-18
Nap1l1	2.85783e-22	-0.477043	0.211	0.582	7.26774e-18
Mtmr7	2.86195e-22	-0.399357	0.11	0.384	7.27822e-18
Grik3	3.14071e-22	-0.477423	0.074	0.305	7.98713e-18
Macrod1	3.28927e-22	-0.366749	0.14	0.452	8.36494e-18
Atf6	3.47058e-22	-0.543057	0.327	0.746	8.82604e-18
Lpcat4	3.47905e-22	-0.279724	0.054	0.266	8.84756e-18
Arhgef17	3.54208e-22	-0.288781	0.067	0.294	9.00786e-18
Plppr5	3.65832e-22	-0.360556	0.097	0.362	9.30347e-18
Ttc8	3.75682e-22	-0.437106	0.273	0.684	9.55396e-18
Pttg1ip	3.81457e-22	-0.292902	0.08	0.328	9.70084e-18
Atl2	3.88339e-22	-0.37944	0.151	0.469	9.87584e-18
Ahi1	4.78268e-22	-0.545407	0.972	0.983	1.21628e-17
Erlin1	4.91383e-22	-0.377612	0.095	0.356	1.24964e-17
Chl1	5.31516e-22	-0.321217	0.078	0.322	1.3517e-17
Lrrc4c	5.36458e-22	0.608453	1	1	1.36427e-17
Pdxk	6.0335e-22	-0.364565	0.078	0.316	1.53438e-17
Clmp	6.06831e-22	-0.307314	0.068	0.294	1.54323e-17
Sema3e	6.33784e-22	-0.523444	0.118	0.395	1.61178e-17
Nme7	6.50043e-22	-0.405258	0.219	0.599	1.65313e-17
Tomm70a	6.98178e-22	-0.408496	0.266	0.684	1.77554e-17
Esrrg	7.37525e-22	-0.681903	0.564	0.78	1.8756e-17
Arhgap44	7.81711e-22	-0.360135	0.078	0.316	1.98797e-17
St3gal5	7.86208e-22	-0.380946	0.133	0.435	1.99941e-17
Scamp1	7.87573e-22	-0.432187	0.231	0.616	2.00288e-17
Adgrb2	9.8619e-22	-0.316436	0.098	0.362	2.50798e-17
Pak7	1.01492e-21	0.78866	0.962	0.898	2.58105e-17
Tmem131l	1.11419e-21	-0.289739	0.059	0.271	2.83349e-17
4833422C13Rik	1.12204e-21	-0.292494	0.07	0.299	2.85346e-17
Atp6v1g2	1.15289e-21	-0.375253	0.107	0.379	2.93192e-17
Rtn4	1.31201e-21	0.631989	0.998	0.983	3.33657e-17
Coq10b	1.32833e-21	-0.37426	0.116	0.39	3.37806e-17
Cdk5r1	1.41317e-21	-0.380646	0.107	0.379	3.59382e-17
4930517O19Rik	1.47975e-21	-0.340794	0.053	0.254	3.76316e-17
Acp1	1.73179e-21	-0.622103	0.591	0.887	4.40411e-17
Sfxn1	1.82153e-21	-0.262851	0.054	0.26	4.63233e-17
Apbb2	1.89486e-21	0.735185	0.953	0.859	4.81881e-17
Fryl	1.93776e-21	0.778154	0.851	0.757	4.92792e-17
Pkd1	2.00869e-21	-0.383826	0.228	0.616	5.1083e-17
Smg5	2.03856e-21	-0.406071	0.194	0.548	5.18427e-17
Sfxn3	2.46571e-21	-0.299212	0.063	0.277	6.27055e-17
Asphd2	2.57028e-21	-0.329493	0.078	0.311	6.53649e-17
Gucy1a2	2.94533e-21	-0.540334	0.606	0.831	7.49026e-17
Dennd1b	3.33801e-21	-0.365372	0.214	0.582	8.48889e-17
3110082I17Rik	3.62303e-21	-0.310116	0.07	0.294	9.21373e-17
Sms	4.01199e-21	-0.353586	0.126	0.418	1.02029e-16
Gnaq	4.45991e-21	0.743337	0.872	0.729	1.1342e-16
Anln	4.54319e-21	1.00321	0.693	0.458	1.15538e-16
Ubxn11	4.59053e-21	-0.338345	0.09	0.339	1.16742e-16
Selenoi	4.84387e-21	-0.431463	0.164	0.48	1.23184e-16
Slc12a2	5.26949e-21	0.757742	0.821	0.763	1.34008e-16
Spock3	5.30252e-21	-0.592972	0.996	0.994	1.34848e-16
Crmp1	5.45924e-21	-0.286905	0.073	0.299	1.38834e-16
Gm44593	5.67508e-21	-0.417642	0.097	0.35	1.44323e-16
Mpped2	5.81614e-21	-0.561328	0.811	0.898	1.4791e-16
B230209E15Rik	5.92333e-21	-0.419703	0.193	0.531	1.50636e-16
Gm1976	5.95129e-21	-0.37555	0.195	0.548	1.51347e-16
Nova2	6.39031e-21	-0.283805	0.088	0.339	1.62512e-16
Pradc1	6.48183e-21	-0.272136	0.058	0.266	1.64839e-16
Nfib	6.81768e-21	1.01845	0.582	0.294	1.73381e-16
Bcl2	7.73347e-21	-0.348181	0.064	0.277	1.9667e-16
Nlgn2	7.81365e-21	-0.251783	0.058	0.266	1.98709e-16
Ccl27a	8.30255e-21	-0.278774	0.058	0.266	2.11142e-16
Crtc1	8.46114e-21	-0.306777	0.102	0.367	2.15175e-16
Tmcc3	8.94342e-21	0.859858	0.785	0.706	2.2744e-16
Macrod2	9.1101e-21	-0.534737	0.994	1	2.31679e-16
Ica1	9.40716e-21	-0.438833	0.4	0.751	2.39234e-16
Ube2e2	9.44053e-21	0.74134	0.993	0.983	2.40082e-16
Gm49961	1.02713e-20	-0.328753	0.1	0.356	2.61211e-16
Snx25	1.04866e-20	-0.342857	0.089	0.333	2.66685e-16
Gm26760	1.05571e-20	-0.340607	0.055	0.254	2.68478e-16
Slc44a1	1.08404e-20	0.7418	0.86	0.859	2.75681e-16
Gatm	1.10725e-20	0.708958	0.898	0.881	2.81586e-16
Khdrbs3	1.16218e-20	-0.36726	0.078	0.311	2.95554e-16
Mdga2	1.19898e-20	0.620343	1	1	3.04913e-16
Tra2a	1.24814e-20	0.675377	0.964	0.836	3.17415e-16
Ctdnep1	1.31603e-20	-0.291182	0.055	0.254	3.3468e-16
Ajm1	1.31847e-20	-0.280741	0.071	0.294	3.353e-16
4930402H24Rik	1.32169e-20	0.620768	0.981	0.887	3.3612e-16
Tceal5	1.33464e-20	-0.299405	0.095	0.35	3.39413e-16
Cdh2	1.36408e-20	0.702259	0.92	0.864	3.46899e-16
Htr2c	1.59206e-20	-0.607588	0.56	0.814	4.04878e-16
Osbpl6	1.59449e-20	-0.458858	0.325	0.678	4.05495e-16
Arid4b	1.62621e-20	0.699935	0.913	0.853	4.13561e-16
Frmd3	1.74418e-20	-0.313861	0.067	0.282	4.43562e-16
Zeb1	1.85954e-20	-0.509299	0.701	0.87	4.729e-16
Arhgap26	1.92034e-20	-0.568075	0.579	0.797	4.88361e-16
Alk	1.97803e-20	0.944842	0.428	0.056	5.03034e-16
Rai1	2.04623e-20	-0.367075	0.155	0.469	5.20376e-16
Fdx2	2.52095e-20	-0.307156	0.077	0.305	6.41104e-16
Tpd52l1	2.77613e-20	-0.298604	0.062	0.271	7.05996e-16
Stox2	2.93164e-20	-0.476108	0.962	0.994	7.45545e-16
Gabrb2	2.94516e-20	-0.464627	0.585	0.842	7.48985e-16
Gm48321	3.28782e-20	-0.306138	0.063	0.271	8.36126e-16
Ina	3.42371e-20	-0.365209	0.058	0.26	8.70683e-16
Abhd2	3.52054e-20	-0.41097	0.168	0.48	8.95307e-16
Cdk9	3.61719e-20	-0.280437	0.076	0.305	9.19886e-16
Kdm7a	3.68381e-20	-0.401351	0.158	0.463	9.3683e-16
Mmd	3.86436e-20	-0.312762	0.063	0.271	9.82746e-16
Tcaf1	3.89083e-20	-0.48803	0.387	0.785	9.89478e-16
4930420G21Rik	4.00045e-20	1.00982	0.688	0.463	1.01736e-15
Gba2	4.50369e-20	-0.290145	0.079	0.311	1.14533e-15
Prkca	4.65642e-20	0.722164	0.912	0.74	1.18417e-15
Slc38a1	4.70109e-20	-0.305167	0.086	0.322	1.19554e-15
Scn1a	4.86552e-20	-0.58126	0.608	0.819	1.23735e-15
Pip5k1c	5.77331e-20	-0.293915	0.07	0.288	1.46821e-15
Mir124-2hg	5.78745e-20	-0.312348	0.128	0.418	1.47181e-15
Ttc39b	5.88756e-20	-0.299867	0.076	0.299	1.49726e-15
Spag9	6.18935e-20	0.644027	0.982	0.949	1.57401e-15
Insyn1	6.4981e-20	-0.280676	0.058	0.26	1.65253e-15
Fam160b2	6.54873e-20	-0.305142	0.103	0.362	1.66541e-15
4930567K12Rik	7.75467e-20	-0.312321	0.083	0.316	1.97209e-15
Slc9a7	7.87903e-20	-0.289227	0.08	0.311	2.00372e-15
Dag1	7.9248e-20	-0.327262	0.105	0.362	2.01536e-15
Ppp1r7	7.94144e-20	-0.361966	0.159	0.469	2.01959e-15
Malat1	8.3034e-20	-0.307726	1	1	2.11164e-15
Clip1	8.64693e-20	-0.288309	0.138	0.441	2.199e-15
Ncs1	8.73869e-20	-0.276134	0.073	0.294	2.22234e-15
Ralgps1	8.76922e-20	0.713057	0.852	0.791	2.2301e-15
Garem1	1.05944e-19	-0.490648	0.336	0.734	2.69425e-15
Ppip5k1	1.13801e-19	-0.398536	0.205	0.548	2.89407e-15
Cnst	1.16917e-19	-0.394663	0.144	0.435	2.97331e-15
AY036118	1.19326e-19	0.448617	0.999	1	3.03459e-15
Unc80	1.29805e-19	-0.475592	0.7	0.853	3.30106e-15
Fabp5	1.36368e-19	-0.518008	0.178	0.48	3.46798e-15
Hsph1	1.517e-19	-0.325784	0.13	0.412	3.85789e-15
C2cd2	1.63725e-19	-0.382819	0.157	0.458	4.16368e-15
Nsg1	1.7299e-19	-0.409791	0.204	0.542	4.3993e-15
Dgkg	1.7892e-19	-0.364867	0.078	0.299	4.55011e-15
Ddx17	1.85621e-19	0.641323	0.941	0.864	4.72052e-15
Ssbp3	2.05343e-19	-0.307295	0.1	0.35	5.22208e-15
Ap1s2	2.23144e-19	-0.352665	0.121	0.39	5.67477e-15
Smurf1	2.24291e-19	-0.349727	0.135	0.418	5.70396e-15
Pptc7	2.53726e-19	-0.304621	0.122	0.395	6.4525e-15
Spred1	3.01242e-19	-0.510395	0.44	0.814	7.6609e-15
Sgsm2	3.11229e-19	-0.386652	0.127	0.395	7.91486e-15
Scn2a	3.26175e-19	-0.465981	0.777	0.921	8.29495e-15
Ssbp2	3.85932e-19	-0.45661	0.9	0.966	9.81464e-15
Gm36198	3.98019e-19	-0.278338	0.095	0.339	1.0122e-14
Tomm40	4.6845e-19	-0.342311	0.126	0.395	1.19132e-14
Chst10	4.78188e-19	-0.254009	0.058	0.254	1.21608e-14
Inf2	4.8325e-19	-0.594158	0.562	0.915	1.22895e-14
Rit2	5.70572e-19	-0.533346	0.621	0.825	1.45102e-14
Calb1	6.26143e-19	-0.448106	0.139	0.418	1.59234e-14
Irak1bp1	6.38903e-19	-0.27944	0.073	0.288	1.62479e-14
Dtnbp1	6.66857e-19	-0.320496	0.111	0.367	1.69588e-14
Luc7l3	6.8997e-19	0.609697	0.937	0.785	1.75466e-14
Otud7b	6.90333e-19	0.815514	0.749	0.616	1.75559e-14
Zkscan16	7.13586e-19	-0.275826	0.078	0.299	1.81472e-14
Fam171a1	7.21068e-19	-0.405803	0.274	0.655	1.83375e-14
Fgf13	8.08895e-19	-0.359503	0.077	0.294	2.0571e-14
Gtpbp1	9.41115e-19	-0.265912	0.078	0.299	2.39335e-14
Ephx4	9.51734e-19	-0.307571	0.118	0.384	2.42036e-14
Rragd	9.55733e-19	-0.288777	0.069	0.277	2.43052e-14
Caly	9.55767e-19	-0.470064	0.43	0.791	2.43061e-14
Tafa2	1.00001e-18	-0.423081	0.069	0.277	2.54314e-14
Sik3	1.04871e-18	0.625716	0.993	0.977	2.66698e-14
Tmem201	1.1445e-18	-0.253055	0.059	0.254	2.91058e-14
Bex1	1.26445e-18	-0.320065	0.122	0.39	3.21563e-14
Sgk3	1.28999e-18	-0.455133	0.372	0.785	3.28058e-14
Sytl2	1.31514e-18	0.849587	0.743	0.593	3.34453e-14
Tiparp	1.36397e-18	-0.378121	0.08	0.299	3.46871e-14
Ccdc106	1.37541e-18	-0.282817	0.09	0.322	3.4978e-14
Lyrm9	1.57003e-18	-0.254009	0.06	0.254	3.99275e-14
Nsg2	1.6343e-18	-0.556711	0.622	0.853	4.15619e-14
Kif26b	1.64682e-18	-0.300996	0.083	0.305	4.18803e-14
Gm40841	1.67828e-18	-0.365992	0.108	0.356	4.26804e-14
Scn8a	1.70241e-18	-0.425007	0.646	0.893	4.32941e-14
Nfasc	1.72469e-18	0.695683	0.895	0.853	4.38606e-14
Stxbp6	1.85615e-18	0.908168	0.681	0.48	4.72038e-14
Zbtb17	1.94012e-18	-0.283253	0.083	0.305	4.93392e-14
Zmym3	2.1038e-18	-0.262531	0.128	0.407	5.35018e-14
Slc25a23	2.18199e-18	-0.401534	0.201	0.525	5.54902e-14
Hdgf	2.20327e-18	-0.344019	0.114	0.367	5.60314e-14
Fbxw7	2.36591e-18	-0.326507	0.226	0.593	6.01675e-14
Gm16599	2.39874e-18	-0.412128	0.191	0.508	6.10023e-14
Gnptg	2.40687e-18	-0.347643	0.214	0.559	6.12091e-14
Dnaja2	2.42395e-18	-0.419047	0.337	0.768	6.16435e-14
Slc9a9	2.44589e-18	0.839823	0.606	0.35	6.22014e-14
Abcb9	2.64834e-18	-0.292459	0.078	0.294	6.735e-14
Brk1	2.78079e-18	-0.380587	0.219	0.565	7.07183e-14
Wrb	2.83719e-18	-0.267766	0.075	0.288	7.21525e-14
Ldlrad4	2.89566e-18	-0.679811	0.789	0.91	7.36394e-14
Tmem263	3.2931e-18	-0.261862	0.083	0.305	8.37468e-14
Nnat	3.32218e-18	-0.551063	0.113	0.362	8.44864e-14
Usp28	3.6255e-18	-0.356311	0.127	0.39	9.22002e-14
C79798	3.73359e-18	-0.316324	0.082	0.299	9.49489e-14
Dnaja1	3.9731e-18	-0.417784	0.331	0.746	1.0104e-13
Dym	4.02951e-18	-0.33835	0.302	0.718	1.02474e-13
Ryr2	4.32544e-18	-0.660788	0.656	0.814	1.1e-13
Klhl13	4.3472e-18	-0.371924	0.176	0.48	1.10554e-13
Ccdc57	4.4148e-18	-0.286928	0.084	0.305	1.12273e-13
Cntn2	4.56101e-18	0.777334	0.637	0.435	1.15991e-13
Pcsk7	5.37663e-18	-0.399913	0.191	0.497	1.36733e-13
Man1a2	5.3863e-18	-0.415111	0.39	0.768	1.36979e-13
Gm11906	5.83352e-18	-0.292902	0.085	0.305	1.48352e-13
Pacsin1	7.12383e-18	-0.392674	0.362	0.757	1.81166e-13
Frrs1l	7.74066e-18	-0.326944	0.114	0.362	1.96853e-13
Svil	8.33555e-18	-0.298765	0.079	0.294	2.11981e-13
Ttll7	9.16561e-18	0.633601	0.963	0.938	2.33091e-13
Gpr176	9.73858e-18	-0.291591	0.065	0.26	2.47662e-13
Epb41l1	1.02322e-17	-0.378121	0.369	0.78	2.60216e-13
Gm30382	1.02588e-17	-0.425652	0.085	0.299	2.6089e-13
Sytl5	1.03693e-17	-0.351319	0.098	0.328	2.63701e-13
Prkab2	1.03721e-17	-0.285116	0.088	0.311	2.63774e-13
Ptprt	1.04202e-17	-0.506564	0.338	0.638	2.64995e-13
Hebp1	1.07376e-17	-0.296322	0.093	0.322	2.73067e-13
Aco2	1.07404e-17	-0.381972	0.288	0.672	2.7314e-13
Gm1673	1.15635e-17	-0.311393	0.097	0.328	2.94072e-13
Gm31356	1.18431e-17	-0.267973	0.07	0.271	3.01182e-13
Bex3	1.21446e-17	-0.381972	0.283	0.667	3.0885e-13
1810034E14Rik	1.2359e-17	-0.278729	0.1	0.339	3.14302e-13
Tef	1.33432e-17	-0.355986	0.328	0.751	3.39331e-13
Cttnbp2	1.37419e-17	-0.46062	0.984	1	3.4947e-13
Fbxo10	1.43542e-17	-0.279167	0.083	0.299	3.65042e-13
Zdhhc2	1.85037e-17	-0.374351	0.14	0.407	4.70567e-13
Son	2.11247e-17	0.528173	1	1	5.37221e-13
Gm42439	2.2537e-17	-0.423703	0.325	0.701	5.73138e-13
Sfxn5	2.44742e-17	-0.36023	0.102	0.333	6.22402e-13
Nrsn2	2.59291e-17	-0.341765	0.1	0.328	6.59404e-13
Ergic1	2.6184e-17	-0.301373	0.118	0.367	6.65884e-13
Abl2	2.71975e-17	-0.365687	0.285	0.661	6.91659e-13
Pde4a	2.88511e-17	-0.33103	0.163	0.458	7.33711e-13
Epha4	3.02423e-17	-0.493783	0.502	0.791	7.69091e-13
Evi5	3.31002e-17	-0.289636	0.1	0.333	8.41771e-13
Calcoco1	3.46253e-17	-0.322337	0.121	0.373	8.80556e-13
Sgsm3	3.47201e-17	-0.261413	0.071	0.271	8.82966e-13
Acvr1	4.03039e-17	-0.356774	0.211	0.537	1.02497e-12
Ociad2	4.14825e-17	-0.311044	0.08	0.288	1.05494e-12
Pla2g3	4.16698e-17	-0.357441	0.167	0.458	1.05971e-12
Foxn3	4.30613e-17	0.703068	0.812	0.746	1.09509e-12
Zdbf2	4.31362e-17	-0.392603	0.068	0.26	1.097e-12
H2afz	5.2254e-17	-0.437823	0.296	0.672	1.32887e-12
Hs2st1	5.31932e-17	-0.339298	0.283	0.661	1.35276e-12
Fbxl2	5.81818e-17	-0.371654	0.244	0.582	1.47962e-12
Fam78b	6.36839e-17	-0.304251	0.087	0.299	1.61955e-12
Stard13	6.38123e-17	0.851355	0.623	0.384	1.62281e-12
Kcnb2	6.44243e-17	-0.689229	0.635	0.774	1.63837e-12
Dip2a	6.63398e-17	0.765201	0.63	0.441	1.68709e-12
Ago2	6.9078e-17	-0.337149	0.138	0.401	1.75672e-12
Gfod1	7.10299e-17	-0.389217	0.191	0.492	1.80636e-12
Adam23	7.81874e-17	-0.419216	0.854	0.932	1.98838e-12
Kif5c	8.20135e-17	-0.378695	0.309	0.672	2.08568e-12
Garnl3	8.30375e-17	-0.292599	0.163	0.458	2.11173e-12
Socs7	8.91858e-17	-0.311029	0.11	0.345	2.26808e-12
Dph6	9.40258e-17	-0.325784	0.245	0.605	2.39117e-12
Gm15594	9.56721e-17	-0.376174	0.125	0.373	2.43304e-12
Nedd4l	9.63251e-17	-0.44348	0.838	0.96	2.44964e-12
Dlg1	9.70873e-17	0.561979	0.978	0.876	2.46903e-12
Dynll1	1.00076e-16	-0.432957	0.325	0.718	2.54503e-12
Pantr1	1.05505e-16	-0.324692	0.142	0.412	2.68311e-12
Ap3s1	1.0646e-16	-0.305142	0.102	0.328	2.70738e-12
Tulp4	1.10722e-16	0.6283	0.87	0.825	2.81577e-12
Zswim5	1.23645e-16	-0.314768	0.2	0.525	3.14441e-12
Ankrd6	1.27342e-16	-0.280371	0.068	0.26	3.23843e-12
Ppp1r37	1.48423e-16	-0.268595	0.102	0.333	3.77455e-12
Lama2	1.65049e-16	1.06918	0.569	0.322	4.19737e-12
Ndufa5	1.7992e-16	-0.417083	0.197	0.503	4.57555e-12
Ccm2	1.81075e-16	-0.376017	0.14	0.395	4.60492e-12
Esrra	1.82788e-16	-0.255866	0.066	0.254	4.64848e-12
Dab2ip	1.85614e-16	-0.396213	0.142	0.395	4.72035e-12
Gm17227	2.02831e-16	-0.300218	0.13	0.384	5.15819e-12
Calm2	2.15111e-16	-0.51222	0.978	0.989	5.4705e-12
Kctd8	2.54984e-16	-0.880619	0.515	0.729	6.48449e-12
Zdhhc20	2.71307e-16	0.643898	0.887	0.836	6.8996e-12
Rpgr	2.83067e-16	-0.298298	0.206	0.531	7.19868e-12
Arhgef10	2.8426e-16	0.750791	0.623	0.418	7.22903e-12
Lpin2	2.85498e-16	-0.253924	0.08	0.282	7.26049e-12
Arpc2	3.02555e-16	-0.368834	0.307	0.684	7.69428e-12
Fam184a	3.20073e-16	-0.338456	0.242	0.582	8.13979e-12
Lonrf2	3.29771e-16	-0.264108	0.094	0.311	8.38641e-12
Dnajb4	3.338e-16	-0.326783	0.197	0.508	8.48888e-12
Rasgrf1	3.59233e-16	-0.501705	0.478	0.734	9.13564e-12
Med12l	3.78386e-16	-0.310119	0.263	0.61	9.62275e-12
Exoc4	3.81714e-16	0.584873	0.988	0.944	9.70738e-12
Itm2b	3.85155e-16	0.710158	0.968	0.893	9.79487e-12
Fkbp5	4.24938e-16	-0.257858	0.085	0.294	1.08066e-11
Ldha	4.36601e-16	-0.270607	0.091	0.305	1.11032e-11
Stau2	4.43395e-16	-0.394568	0.396	0.74	1.1276e-11
Fam219a	4.47538e-16	-0.377595	0.317	0.712	1.13813e-11
Hmgcr	4.52371e-16	-0.254066	0.118	0.367	1.15043e-11
B3galt1	4.66393e-16	0.583865	0.996	0.989	1.18608e-11
Itch	4.94438e-16	0.614721	0.853	0.757	1.25741e-11
Fam216a	4.95354e-16	-0.283253	0.081	0.282	1.25973e-11
Shb	5.48717e-16	-0.280819	0.147	0.412	1.39544e-11
Thy1	5.70473e-16	-0.302608	0.142	0.407	1.45077e-11
Skil	5.73292e-16	-0.319298	0.105	0.328	1.45794e-11
A230001M10Rik	5.90057e-16	0.836358	0.652	0.48	1.50057e-11
Ncdn	6.32102e-16	-0.358301	0.195	0.497	1.6075e-11
Kif13b	6.80221e-16	0.652262	0.831	0.808	1.72987e-11
Atp8a2	6.86839e-16	-0.431267	0.389	0.689	1.7467e-11
Hace1	7.00121e-16	-0.379333	0.339	0.706	1.78048e-11
Gm10863	7.39204e-16	0.75312	0.52	0.237	1.87987e-11
Igsf9b	7.4505e-16	-0.301188	0.099	0.316	1.89474e-11
G630016G05Rik	8.31268e-16	-0.255164	0.081	0.282	2.114e-11
Zfp2	8.32618e-16	-0.292231	0.117	0.35	2.11743e-11
Mrtfb	9.92125e-16	-0.361346	0.913	0.972	2.52307e-11
Khsrp	1.11947e-15	-0.335722	0.15	0.412	2.84692e-11
Fut9	1.18442e-15	-0.464556	0.623	0.842	3.01209e-11
Ttc3	1.21132e-15	-0.392254	0.979	0.994	3.08051e-11
Nckap5	1.36756e-15	0.918142	0.402	0.107	3.47784e-11
Serp2	1.41952e-15	-0.343435	0.137	0.384	3.60998e-11
Synpr	1.54304e-15	-0.473298	0.246	0.565	3.9241e-11
Dtna	1.57331e-15	0.572556	0.945	0.831	4.00108e-11
Zfp943	1.71537e-15	-0.268033	0.12	0.356	4.36237e-11
Prkx	2.30648e-15	-0.250236	0.075	0.266	5.86562e-11
Hnrnpa2b1	2.48339e-15	0.550841	0.979	0.898	6.3155e-11
Neo1	2.48836e-15	0.696719	0.749	0.712	6.32816e-11
Cbx6	2.56068e-15	-0.300693	0.138	0.39	6.51207e-11
Hecw1	2.56704e-15	-0.412929	0.31	0.605	6.52825e-11
8030462N17Rik	2.67937e-15	-0.288309	0.25	0.605	6.81391e-11
Rev1	2.93811e-15	-0.361607	0.353	0.718	7.47191e-11
Gm5577	2.94914e-15	-0.261182	0.071	0.254	7.49996e-11
Tmem132d	3.28565e-15	0.970609	0.53	0.271	8.35573e-11
B4gat1	3.29997e-15	-0.269061	0.12	0.356	8.39215e-11
Tmsb10	3.39755e-15	-0.279057	0.166	0.446	8.6403e-11
Thsd4	3.49808e-15	-0.304988	0.11	0.333	8.89597e-11
Prkci	3.55992e-15	-0.263521	0.123	0.362	9.05323e-11
Bhlhe41	3.86859e-15	-0.280819	0.145	0.401	9.83821e-11
Rpl26	3.91055e-15	-0.464711	0.289	0.621	9.94492e-11
Timm9	3.94946e-15	-0.280536	0.21	0.525	1.00439e-10
Ywhah	4.00209e-15	-0.330976	0.175	0.458	1.01777e-10
Dtx3	4.01501e-15	-0.374826	0.26	0.582	1.02106e-10
Rbms3	4.08524e-15	-0.517017	0.678	0.819	1.03892e-10
Syn2	4.22579e-15	-0.493011	0.656	0.814	1.07466e-10
Lyst	4.25301e-15	-0.364361	0.364	0.734	1.08158e-10
Lactb	4.32521e-15	-0.254999	0.11	0.333	1.09994e-10
Grina	4.46379e-15	-0.436815	0.38	0.729	1.13519e-10
Pld3	4.48311e-15	-0.328728	0.157	0.418	1.1401e-10
Zfp804a	4.83637e-15	-0.52156	0.556	0.768	1.22994e-10
Syn1	4.96885e-15	-0.291096	0.152	0.418	1.26363e-10
Mycbp2	5.07295e-15	0.47755	1	1	1.2901e-10
Ppp1r12c	5.14706e-15	-0.252074	0.115	0.345	1.30895e-10
Gpr45	5.23363e-15	-0.265912	0.07	0.254	1.33096e-10
Trio	5.62405e-15	-0.422264	0.553	0.774	1.43025e-10
Mgat4c	5.70545e-15	-0.432375	0.905	0.876	1.45095e-10
Fgfr2	5.71504e-15	0.459472	0.994	0.983	1.45339e-10
C1qtnf4	5.78299e-15	-0.481158	0.539	0.797	1.47067e-10
Vdac1	5.83777e-15	-0.373132	0.305	0.655	1.4846e-10
Arntl	5.99036e-15	-0.304379	0.092	0.294	1.52341e-10
Fnbp1	6.18227e-15	0.57484	0.962	0.983	1.57221e-10
Klhl2	6.22964e-15	0.578626	0.975	0.96	1.58426e-10
Tnrc6b	6.56735e-15	0.547102	0.955	0.802	1.67014e-10
Sh3glb2	6.64558e-15	-0.309683	0.151	0.407	1.69004e-10
Sema6a	7.0694e-15	0.702734	0.681	0.492	1.79782e-10
Ppp1r13b	7.34412e-15	-0.35334	0.315	0.684	1.86768e-10
Pafah1b1	8.4441e-15	0.555308	0.977	0.949	2.14742e-10
Far2	8.82081e-15	-0.277695	0.109	0.328	2.24322e-10
Folh1	9.14225e-15	0.725605	0.571	0.345	2.32496e-10
Utp4	9.246e-15	-0.261515	0.085	0.282	2.35135e-10
Agap3	9.87214e-15	-0.276994	0.12	0.35	2.51058e-10
Wls	1.00569e-14	0.800459	0.53	0.299	2.55757e-10
Brms1	1.08152e-14	-0.296073	0.125	0.356	2.75042e-10
Gm4221	1.14478e-14	0.837773	0.505	0.254	2.91129e-10
Abi2	1.18706e-14	-0.378828	0.614	0.881	3.01881e-10
Gm48091	1.19306e-14	-0.309269	0.099	0.305	3.03407e-10
Lrpap1	1.19427e-14	-0.336117	0.286	0.638	3.03716e-10
Enpp6	1.1967e-14	0.760007	0.558	0.299	3.04333e-10
Fam172a	1.20603e-14	0.601247	0.927	0.836	3.06705e-10
Dock1	1.25221e-14	0.703508	0.685	0.576	3.1845e-10
Large1	1.30116e-14	-0.31952	0.894	0.938	3.30897e-10
Zfhx3	1.36627e-14	-0.617392	0.413	0.684	3.47456e-10
Fbxo33	1.38914e-14	-0.29047	0.12	0.345	3.53273e-10
Fkbp2	1.46887e-14	-0.350901	0.195	0.48	3.73548e-10
Ccdc187	1.52445e-14	-0.263407	0.092	0.294	3.87683e-10
Sh3gl2	1.53324e-14	-0.290516	0.214	0.514	3.89919e-10
Pcdh15	1.55094e-14	0.991515	0.56	0.345	3.94419e-10
Hnrnpa0	1.57386e-14	-0.274104	0.093	0.294	4.00249e-10
Adar	1.57878e-14	-0.287909	0.162	0.424	4.015e-10
Nexmif	1.61749e-14	-0.260175	0.095	0.299	4.11344e-10
Rnf103	1.62185e-14	-0.348745	0.192	0.469	4.12452e-10
Ccni	1.6455e-14	-0.30367	0.162	0.424	4.18468e-10
Gpr155	1.65871e-14	-0.508863	0.267	0.559	4.21827e-10
Cpne8	1.75402e-14	-0.291483	0.081	0.271	4.46065e-10
Cadm1	1.8768e-14	0.565286	0.935	0.734	4.77288e-10
Gtf2ird1	2.0083e-14	-0.284235	0.148	0.401	5.10731e-10
Metap1d	2.01105e-14	0.806792	0.552	0.373	5.11429e-10
Peg3	2.0155e-14	-0.41134	0.386	0.695	5.12561e-10
Chsy3	2.02942e-14	-0.393878	0.827	0.904	5.16102e-10
Reep2	2.03114e-14	-0.270008	0.074	0.254	5.16539e-10
Mlf2	2.10452e-14	-0.373136	0.226	0.525	5.352e-10
Bbs4	2.13352e-14	-0.254425	0.103	0.316	5.42575e-10
D030068K23Rik	2.17241e-14	-0.256243	0.08	0.271	5.52465e-10
Orc4	2.18191e-14	-0.323982	0.278	0.621	5.54882e-10
Tusc3	2.18408e-14	-0.445295	0.593	0.825	5.55433e-10
Vav3	2.28322e-14	-0.281903	0.083	0.271	5.80646e-10
Mbd2	2.38833e-14	-0.38852	0.223	0.508	6.07377e-10
Rbm39	2.59044e-14	0.443429	0.999	1	6.58774e-10
Bri3	2.65244e-14	-0.298577	0.169	0.435	6.74543e-10
Tjp1	2.74153e-14	0.612543	0.973	0.949	6.97199e-10
Ppfibp2	2.77093e-14	0.696112	0.584	0.384	7.04676e-10
Dlat	3.16722e-14	-0.308174	0.143	0.384	8.05455e-10
Scrn1	3.33524e-14	-0.397804	0.278	0.588	8.48184e-10
Nkap	3.51427e-14	-0.304495	0.13	0.362	8.93715e-10
Map4	3.54213e-14	0.659412	0.779	0.797	9.00798e-10
Ube3a	3.5556e-14	-0.339677	0.984	0.994	9.04226e-10
Ccdc148	3.75339e-14	-0.273639	0.178	0.452	9.54524e-10
Gtf3c1	3.75888e-14	-0.323574	0.22	0.52	9.5592e-10
Ncoa2	4.06377e-14	0.585188	0.863	0.78	1.03346e-09
Napb	4.06467e-14	-0.264034	0.163	0.429	1.03369e-09
Hcn1	4.17605e-14	-0.28756	0.172	0.441	1.06201e-09
Ankrd45	4.26322e-14	-0.25456	0.078	0.26	1.08418e-09
Sub1	4.43752e-14	-0.374954	0.207	0.492	1.12851e-09
Klhdc1	4.5419e-14	-0.273758	0.127	0.356	1.15505e-09
Gm26542	4.59451e-14	-0.347097	0.104	0.311	1.16843e-09
1700111E14Rik	4.7696e-14	-0.41111	0.323	0.655	1.21296e-09
Elovl7	4.8083e-14	0.720722	0.627	0.458	1.2228e-09
Opcml	4.89178e-14	-0.529229	0.989	0.949	1.24403e-09
Map3k12	5.03726e-14	-0.30859	0.117	0.333	1.28103e-09
Mmp16	5.18495e-14	-0.405274	0.717	0.842	1.31858e-09
Emc3	5.20208e-14	-0.297745	0.194	0.48	1.32294e-09
Tasp1	5.24042e-14	-0.259396	0.277	0.633	1.33269e-09
Wdr47	5.56794e-14	-0.297168	0.189	0.463	1.41598e-09
Ndufb10	5.57396e-14	-0.337847	0.24	0.554	1.41751e-09
Tmod1	5.5906e-14	-0.339182	0.285	0.616	1.42175e-09
Nipbl	5.94237e-14	0.524176	0.895	0.797	1.5112e-09
Msra	6.08931e-14	-0.42903	0.519	0.785	1.54857e-09
Pcdh7	6.09817e-14	-0.422558	0.869	0.864	1.55083e-09
Ogfrl1	6.20389e-14	-0.286603	0.123	0.35	1.57771e-09
Ahcyl1	6.44256e-14	-0.332535	0.346	0.729	1.63841e-09
Rtn1	6.50884e-14	-0.38583	0.954	0.972	1.65526e-09
Ccdc85b	6.68561e-14	-0.278852	0.149	0.395	1.70022e-09
Mtx1	6.88355e-14	-0.263202	0.093	0.288	1.75056e-09
Ppp1ca	7.03439e-14	-0.360788	0.191	0.458	1.78892e-09
Arhgef9	8.04557e-14	-0.415238	0.722	0.881	2.04607e-09
Itsn1	8.69424e-14	-0.265578	0.249	0.582	2.21103e-09
Foxp2	9.54794e-14	-0.816214	0.694	0.757	2.42814e-09
Cpt1c	9.769e-14	-0.321648	0.267	0.588	2.48435e-09
Map3k10	9.77407e-14	-0.252685	0.093	0.288	2.48564e-09
Ndfip2	1.01933e-13	-0.461064	0.467	0.797	2.59226e-09
Apex2	1.08196e-13	-0.29471	0.164	0.418	2.75154e-09
Zmat3	1.14802e-13	-0.266283	0.12	0.333	2.91954e-09
Ybx1	1.24453e-13	-0.31616	0.288	0.627	3.16495e-09
Gpcpd1	1.40816e-13	-0.28862	0.322	0.684	3.58109e-09
Mt1	1.41355e-13	-0.455714	0.278	0.588	3.59479e-09
Rcor1	1.45937e-13	-0.278255	0.159	0.412	3.71134e-09
Dusp15	1.51173e-13	0.779488	0.538	0.316	3.84447e-09
Mgll	1.51183e-13	-0.300966	0.14	0.373	3.84473e-09
Arhgef28	1.7825e-13	0.694281	0.619	0.435	4.53307e-09
Nsun2	1.81774e-13	-0.264907	0.121	0.339	4.6227e-09
Luzp1	1.84153e-13	-0.271493	0.137	0.373	4.68319e-09
A330102I10Rik	1.94656e-13	-0.260621	0.125	0.35	4.95031e-09
Rps6ka2	1.96127e-13	-0.259015	0.092	0.282	4.98771e-09
Gm26871	1.99624e-13	-0.358594	0.814	0.87	5.07663e-09
Gm28198	2.03751e-13	-0.306584	0.162	0.407	5.18159e-09
Ptprj	2.05582e-13	-0.344893	0.372	0.706	5.22814e-09
Eps15l1	2.16121e-13	-0.291993	0.33	0.706	5.49617e-09
Casc4	2.16438e-13	-0.319845	0.411	0.729	5.50423e-09
Nefl	2.23076e-13	-0.27875	0.083	0.266	5.67305e-09
Pnn	2.47431e-13	0.541728	0.846	0.701	6.29243e-09
Tgfa	2.7687e-13	-0.280793	0.258	0.588	7.04108e-09
Ubxn2b	2.90262e-13	-0.252881	0.149	0.39	7.38164e-09
Cyth1	2.95246e-13	0.684613	0.621	0.469	7.5084e-09
Gm43376	3.05807e-13	-0.355307	0.206	0.475	7.77698e-09
2510009E07Rik	3.15835e-13	-0.283971	0.182	0.441	8.03199e-09
Zfp280c	3.42634e-13	0.634473	0.728	0.695	8.71352e-09
Pgbd5	3.42808e-13	-0.311317	0.164	0.412	8.71794e-09
Zc3h12c	3.47855e-13	-0.360506	0.182	0.429	8.84631e-09
Jph4	3.79251e-13	-0.26202	0.21	0.503	9.64474e-09
Pou6f1	3.8814e-13	-0.266453	0.131	0.356	9.87079e-09
Slc9a1	3.93921e-13	-0.262041	0.109	0.311	1.00178e-08
Apc	4.09523e-13	0.50771	0.968	0.881	1.04146e-08
Rcan2	4.26067e-13	-0.426262	0.747	0.904	1.08353e-08
Ext1	4.29275e-13	0.567588	0.833	0.667	1.09169e-08
Nt5c2	4.35381e-13	-0.28372	0.305	0.65	1.10722e-08
Ogt	4.86161e-13	0.469452	0.974	0.881	1.23636e-08
Mef2c	5.12723e-13	-0.492604	0.563	0.757	1.30391e-08
Cyld	5.18798e-13	-0.371061	0.806	0.944	1.31936e-08
Zfand6	5.34837e-13	0.744958	0.577	0.424	1.36014e-08
Plekhh1	5.84721e-13	0.603549	0.713	0.571	1.487e-08
Aatk	5.98985e-13	0.564776	0.777	0.729	1.52328e-08
Abhd14a	6.1504e-13	-0.254425	0.109	0.311	1.56411e-08
Hist1h2bc	6.3638e-13	-0.319535	0.178	0.435	1.61838e-08
Wnk3	6.57309e-13	-0.258838	0.106	0.305	1.6716e-08
Gjc3	7.0239e-13	0.578349	0.794	0.74	1.78625e-08
Wipf1	7.03173e-13	0.732375	0.574	0.384	1.78824e-08
Tmem181a	7.12013e-13	-0.252272	0.221	0.52	1.81072e-08
Nell2	7.1759e-13	-0.354449	0.534	0.791	1.8249e-08
Tspyl2	7.18992e-13	-0.256083	0.132	0.35	1.82847e-08
Slc32a1	7.77868e-13	-0.289895	0.169	0.418	1.9782e-08
Aplp1	7.98632e-13	0.573609	0.97	0.972	2.031e-08
Cyp7b1	8.06587e-13	-0.298433	0.1	0.288	2.05123e-08
Cobll1	8.15155e-13	0.678922	0.629	0.48	2.07302e-08
Rps17	8.21213e-13	-0.275591	0.168	0.418	2.08843e-08
Tmem163	9.33043e-13	0.776688	0.431	0.186	2.37282e-08
Pja1	9.61885e-13	-0.270005	0.104	0.299	2.44617e-08
Nf1	9.83911e-13	0.546933	0.842	0.757	2.50218e-08
Etl4	1.01328e-12	-0.522845	0.64	0.763	2.57687e-08
Suds3	1.18297e-12	-0.25867	0.126	0.339	3.0084e-08
Tnrc18	1.22677e-12	-0.290257	0.181	0.435	3.11981e-08
Ggt7	1.24979e-12	-0.289954	0.154	0.39	3.17835e-08
Fign	1.31978e-12	0.715513	0.582	0.384	3.35634e-08
Arap2	1.32583e-12	0.689813	0.645	0.548	3.37173e-08
Diaph2	1.33423e-12	-0.351388	0.935	0.966	3.39307e-08
Hspa12a	1.45315e-12	-0.267512	0.112	0.311	3.69552e-08
Mprip	1.46514e-12	-0.373631	0.646	0.898	3.72601e-08
Pdhb	1.60484e-12	-0.30774	0.158	0.395	4.08127e-08
Maco1	1.66994e-12	-0.278902	0.294	0.627	4.24683e-08
Unc5d	1.68925e-12	-0.76737	0.118	0.311	4.29592e-08
Timm8b	1.75642e-12	-0.285313	0.122	0.333	4.46675e-08
Zc2hc1a	1.77535e-12	-0.264933	0.137	0.356	4.5149e-08
Gpm6a	1.89593e-12	-0.313227	0.888	0.955	4.82154e-08
Zswim6	1.9567e-12	-0.418983	0.941	0.949	4.97609e-08
Il1rap	1.98087e-12	0.693876	0.67	0.599	5.03756e-08
Wdr17	1.98528e-12	-0.336516	0.581	0.791	5.04877e-08
Tmem63b	2.06801e-12	-0.269586	0.149	0.379	5.25916e-08
Rnf13	2.11327e-12	0.54523	0.841	0.831	5.37424e-08
Hepacam	2.18622e-12	0.628574	0.687	0.582	5.55977e-08
Mrtfa	2.21177e-12	-0.291717	0.268	0.588	5.62475e-08
Nkain3	2.27757e-12	-0.516601	0.419	0.644	5.79208e-08
Pnmal2	2.29524e-12	-0.269636	0.107	0.299	5.83702e-08
Selenow	2.44487e-12	-0.398231	0.396	0.718	6.21754e-08
Mt3	2.57228e-12	-0.326764	0.191	0.446	6.54157e-08
Dmxl2	2.83771e-12	-0.290819	0.349	0.689	7.21657e-08
Cdk17	2.935e-12	-0.411054	0.785	0.904	7.46399e-08
Zfp799	3.00311e-12	-0.287565	0.216	0.492	7.6372e-08
4930509J09Rik	3.07521e-12	-0.261918	0.1	0.288	7.82058e-08
Bex2	3.13081e-12	-0.356966	0.349	0.667	7.96196e-08
Foxo3	3.36967e-12	-0.293752	0.179	0.424	8.56942e-08
2610035D17Rik	3.50958e-12	0.693979	0.589	0.446	8.92522e-08
Snrnp70	3.78862e-12	0.443837	0.998	0.983	9.63483e-08
Tomm20	3.81867e-12	-0.332374	0.294	0.599	9.71127e-08
Uhrf1bp1l	4.14852e-12	-0.25485	0.137	0.356	1.05501e-07
Abca8a	4.25806e-12	0.770465	0.426	0.186	1.08287e-07
Creb5	4.43962e-12	0.678893	0.622	0.452	1.12904e-07
Angel2	4.49023e-12	-0.260088	0.278	0.599	1.14191e-07
Srpk1	4.53968e-12	-0.290459	0.236	0.52	1.15449e-07
Epb41l3	4.60258e-12	0.570828	0.884	0.847	1.17048e-07
Kdm4b	4.70605e-12	-0.256495	0.183	0.435	1.1968e-07
D7Ertd443e	5.12352e-12	0.626025	0.77	0.763	1.30296e-07
Lsamp	6.20654e-12	-0.320787	0.996	1	1.57839e-07
Rab31	6.22771e-12	0.616841	0.68	0.576	1.58377e-07
Wasf1	6.40455e-12	-0.356011	0.39	0.712	1.62874e-07
Sept4	6.47058e-12	0.534113	0.881	0.87	1.64553e-07
Tmem117	7.04213e-12	0.800958	0.644	0.588	1.79089e-07
Rock1	7.11141e-12	0.488876	0.848	0.774	1.8085e-07
Sergef	7.58014e-12	-0.275936	0.128	0.333	1.92771e-07
Sdcbp	7.7995e-12	-0.253442	0.148	0.373	1.98349e-07
Fzd3	8.3041e-12	-0.277637	0.128	0.333	2.11181e-07
Ptpre	8.86155e-12	-0.29364	0.199	0.446	2.25358e-07
Jam3	1.05988e-11	0.609676	0.636	0.508	2.69539e-07
Atp1a3	1.07153e-11	-0.410481	0.552	0.763	2.725e-07
Prkar1a	1.09275e-11	-0.308264	0.268	0.565	2.77897e-07
Cdyl2	1.12826e-11	-0.255437	0.125	0.328	2.86927e-07
Kpna1	1.2364e-11	-0.275396	0.226	0.503	3.14429e-07
Cystm1	1.35032e-11	-0.33648	0.26	0.548	3.434e-07
Mcu	1.37708e-11	-0.256356	0.254	0.548	3.50205e-07
Elavl3	1.3952e-11	0.578592	0.804	0.785	3.54812e-07
Stxbp3	1.47041e-11	0.667248	0.584	0.446	3.73939e-07
Atp6v1d	1.64865e-11	-0.255158	0.26	0.559	4.19267e-07
Dek	1.75006e-11	-0.255029	0.152	0.373	4.45057e-07
Pcdh11x	1.82979e-11	0.621305	0.87	0.712	4.65333e-07
Tsnax	1.84682e-11	-0.296721	0.305	0.621	4.69665e-07
Tbc1d4	2.00054e-11	-0.275834	0.097	0.271	5.08758e-07
Nav1	2.08811e-11	0.683676	0.583	0.475	5.31027e-07
Zfp706	2.09413e-11	-0.305976	0.232	0.503	5.32558e-07
1500011B03Rik	2.16784e-11	-0.272092	0.177	0.412	5.51303e-07
Mapk10	2.31323e-11	-0.271779	0.866	0.898	5.88278e-07
Polr2a	2.35678e-11	0.634139	0.417	0.192	5.99352e-07
Cacnb4	2.38773e-11	-0.316164	0.964	0.983	6.07223e-07
Gabarapl1	2.53686e-11	-0.262232	0.196	0.446	6.45148e-07
Trpm3	2.5377e-11	-0.669514	0.306	0.52	6.45362e-07
4930445B16Rik	2.54184e-11	-0.3099	0.161	0.384	6.46416e-07
Daam1	2.54436e-11	0.604186	0.717	0.689	6.47055e-07
Dtd1	2.60149e-11	-0.253095	0.283	0.599	6.61586e-07
Nrxn1	2.66953e-11	-0.266701	0.982	0.994	6.78889e-07
Plp1	2.82793e-11	0.363422	0.999	1	7.1917e-07
Rasal2	2.85894e-11	0.526505	0.929	0.853	7.27057e-07
Gria4	2.89108e-11	0.555677	0.989	0.91	7.35231e-07
Celf4	3.22044e-11	-0.405723	0.736	0.797	8.18991e-07
Abi1	3.27177e-11	-0.295871	0.428	0.814	8.32043e-07
Gm19500	3.66057e-11	0.651684	0.554	0.379	9.30921e-07
Opa1	3.70234e-11	-0.297948	0.276	0.565	9.41543e-07
Wdyhv1	3.73692e-11	-0.250882	0.094	0.266	9.50335e-07
Ankrd44	3.74441e-11	0.589842	0.378	0.147	9.52241e-07
Znrf3	3.78633e-11	-0.280555	0.228	0.497	9.62901e-07
Rnf227	3.79764e-11	-0.288748	0.109	0.288	9.65777e-07
Rassf8	3.81509e-11	-0.319767	0.379	0.712	9.70214e-07
Neat1	4.17251e-11	0.611872	0.854	0.825	1.06111e-06
Usp54	4.22904e-11	0.625068	0.65	0.593	1.07549e-06
Tenm3	4.27307e-11	-0.41155	0.79	0.791	1.08668e-06
Cdh19	4.56675e-11	0.765591	0.577	0.429	1.16137e-06
Sptan1	4.95755e-11	-0.359015	0.426	0.701	1.26075e-06
Uqcrq	5.58564e-11	-0.279798	0.276	0.571	1.42049e-06
Mtf2	5.72301e-11	-0.260432	0.34	0.65	1.45542e-06
Wdr37	5.77691e-11	-0.265372	0.293	0.61	1.46913e-06
Sppl2a	5.80416e-11	-0.250265	0.191	0.435	1.47605e-06
Gdap1	5.92941e-11	-0.259096	0.159	0.379	1.50791e-06
Srsf10	5.93986e-11	-0.26785	0.243	0.514	1.51057e-06
Rmnd5a	6.39667e-11	-0.276031	0.277	0.576	1.62674e-06
Mbtps1	6.51984e-11	-0.258644	0.173	0.401	1.65806e-06
Dok6	6.58159e-11	-0.342203	0.772	0.814	1.67376e-06
Slc6a1	6.65139e-11	-0.281267	0.404	0.746	1.69151e-06
Usp50	6.8978e-11	-0.273906	0.16	0.379	1.75418e-06
Abca1	7.04794e-11	0.583859	0.396	0.175	1.79236e-06
Mrpl41	7.12645e-11	-0.337495	0.228	0.48	1.81233e-06
Rbm25	7.14258e-11	0.480122	0.893	0.831	1.81643e-06
Apba1	7.23607e-11	0.615361	0.707	0.633	1.8402e-06
Nfx1	7.32526e-11	-0.306453	0.521	0.853	1.86289e-06
Mbnl1	7.49089e-11	0.496173	0.873	0.808	1.90501e-06
Kcnq3	7.71458e-11	0.513217	0.996	0.972	1.9619e-06
Srgap1	8.40533e-11	-0.384267	0.715	0.887	2.13756e-06
Rps6ka3	9.03785e-11	-0.320406	0.557	0.814	2.29841e-06
Ddr1	9.81483e-11	0.58722	0.591	0.435	2.49601e-06
Akap11	9.89548e-11	-0.253307	0.411	0.768	2.51652e-06
Gm20275	1.05088e-10	-0.363674	0.535	0.791	2.6725e-06
Pak1	1.08859e-10	0.564078	0.794	0.842	2.76838e-06
Rnps1	1.12076e-10	-0.270646	0.181	0.412	2.8502e-06
Ldhb	1.12972e-10	-0.342339	0.455	0.774	2.873e-06
Ndufs3	1.15658e-10	-0.287952	0.232	0.492	2.94131e-06
Tspan5	1.19817e-10	0.546712	0.885	0.814	3.04708e-06
Gmcl1	1.22266e-10	-0.321732	0.424	0.712	3.10934e-06
Peak1	1.23182e-10	-0.297733	0.236	0.492	3.13264e-06
Qrich1	1.28391e-10	-0.264355	0.304	0.61	3.2651e-06
Ablim2	1.28609e-10	-0.312638	0.9	0.972	3.27066e-06
Vrk1	1.30856e-10	-0.265767	0.126	0.316	3.3278e-06
Dennd1a	1.44697e-10	0.47928	0.983	0.921	3.67978e-06
Pacs2	1.47493e-10	0.59068	0.562	0.407	3.7509e-06
Cpox	1.53148e-10	0.633582	0.574	0.424	3.8947e-06
Nos1ap	1.63393e-10	-0.411824	0.458	0.712	4.15524e-06
Faah	1.81624e-10	0.560901	0.3	0.085	4.61888e-06
Fam120b	1.8163e-10	-0.256992	0.294	0.588	4.61903e-06
Ndufb2	1.93869e-10	-0.317372	0.193	0.424	4.93029e-06
Ptn	2.01173e-10	0.478415	0.92	0.853	5.11603e-06
Rpl14	2.07452e-10	-0.362507	0.28	0.548	5.27572e-06
Daam2	2.12424e-10	0.562403	0.625	0.508	5.40217e-06
Rbfox2	2.14695e-10	-0.281874	0.774	0.91	5.45991e-06
Atp1a1	2.38291e-10	-0.283551	0.267	0.542	6.05998e-06
Rffl	2.44911e-10	0.652562	0.586	0.48	6.22834e-06
Sod2	2.53776e-10	-0.267626	0.212	0.458	6.45378e-06
Pbx1	2.60369e-10	-0.256762	0.899	0.921	6.62144e-06
Nrbp2	2.6481e-10	0.513481	0.601	0.463	6.73437e-06
Calm3	2.74207e-10	-0.284639	0.228	0.48	6.97335e-06
Lrrc8c	2.98161e-10	-0.252856	0.17	0.384	7.58253e-06
Zfp608	3.00393e-10	0.673417	0.563	0.463	7.63931e-06
Zbtb7a	3.23627e-10	-0.288696	0.191	0.418	8.23015e-06
Wdfy3	3.73687e-10	0.429283	0.777	0.661	9.50324e-06
Dnajc8	4.21084e-10	-0.261201	0.207	0.446	1.07086e-05
Phf14	4.26727e-10	0.518258	0.87	0.819	1.08521e-05
Pfdn1	4.62165e-10	-0.269627	0.217	0.463	1.17533e-05
Agpat4	4.73369e-10	0.514646	0.623	0.469	1.20382e-05
Tsc22d1	4.90322e-10	-0.332608	0.601	0.819	1.24694e-05
Cyp27a1	4.93069e-10	0.614877	0.396	0.181	1.25392e-05
Kif13a	4.97757e-10	0.582194	0.727	0.746	1.26584e-05
Dennd4c	5.36313e-10	-0.267717	0.219	0.469	1.3639e-05
Sh3bgrl3	5.36747e-10	-0.377914	0.255	0.503	1.365e-05
Rpl37	5.52133e-10	-0.314735	0.283	0.548	1.40413e-05
Fam214a	5.53141e-10	-0.255819	0.342	0.661	1.40669e-05
Rsrp1	5.68493e-10	0.353539	0.99	0.96	1.44573e-05
Sgcd	5.85977e-10	-0.482946	0.595	0.718	1.4902e-05
Chd7	6.00261e-10	0.597094	0.542	0.379	1.52652e-05
Hspa4	6.28778e-10	-0.306434	0.377	0.695	1.59905e-05
Gnb2	6.33728e-10	-0.253729	0.356	0.689	1.61163e-05
Mtss1	7.35622e-10	0.573528	0.394	0.186	1.87076e-05
Bicd1	7.66355e-10	0.479205	0.9	0.836	1.94892e-05
Atp5md	7.6928e-10	-0.267181	0.196	0.429	1.95635e-05
Ppp1cc	8.57947e-10	-0.336573	0.256	0.503	2.18184e-05
Atp6v1b2	9.04918e-10	-0.255773	0.325	0.633	2.3013e-05
Rbm5	1.10598e-09	0.423671	0.885	0.831	2.81262e-05
Ndufa11	1.21754e-09	-0.299312	0.238	0.48	3.09633e-05
Zcchc7	1.25984e-09	0.380544	0.992	0.972	3.2039e-05
Elob	1.26476e-09	-0.301907	0.367	0.661	3.21642e-05
Nsf	1.2767e-09	-0.312821	0.693	0.842	3.24677e-05
Basp1	1.39699e-09	-0.290591	0.191	0.412	3.55269e-05
Bcas3	1.40181e-09	0.476081	0.907	0.853	3.56494e-05
Bbof1	1.46581e-09	-0.271021	0.156	0.35	3.7277e-05
March8	1.50303e-09	0.563592	0.48	0.305	3.82236e-05
Eml5	1.55399e-09	-0.327523	0.826	0.898	3.95195e-05
Tnpo1	1.64333e-09	-0.264959	0.371	0.672	4.17915e-05
Adamtsl1	1.7562e-09	0.651774	0.607	0.525	4.4662e-05
Heg1	1.85207e-09	0.594735	0.47	0.271	4.71e-05
Ftx	2.01945e-09	-0.297255	0.668	0.842	5.13567e-05
Ndufb1-ps	2.07233e-09	-0.263723	0.164	0.362	5.27013e-05
Fgf1	2.1027e-09	0.477359	0.285	0.079	5.34738e-05
Srsf5	2.17025e-09	0.37742	0.865	0.802	5.51916e-05
Pip4k2a	2.34601e-09	0.529375	0.726	0.729	5.96614e-05
Otud7a	2.52429e-09	0.482863	0.944	0.847	6.41953e-05
Chchd10	2.74331e-09	-0.399742	0.489	0.763	6.97652e-05
Crppa	2.90795e-09	0.645682	0.495	0.356	7.39521e-05
Trps1	2.99777e-09	0.495821	0.88	0.797	7.62363e-05
Ttc19	3.11935e-09	-0.287022	0.589	0.836	7.93281e-05
Dleu2	3.20155e-09	0.498665	0.9	0.904	8.14185e-05
Cox5b	3.20931e-09	-0.314458	0.352	0.65	8.1616e-05
Atp5j	3.26724e-09	-0.355754	0.317	0.582	8.30892e-05
Kmt2e	3.27748e-09	0.397253	0.888	0.847	8.33497e-05
Ndufb4	3.38227e-09	-0.253802	0.186	0.401	8.60145e-05
Gab2	3.68486e-09	0.705726	0.48	0.333	9.37098e-05
Mark2	3.91259e-09	-0.312456	0.476	0.763	9.95011e-05
Rpl15	3.99927e-09	-0.286303	0.33	0.616	0.000101705
Mbnl2	3.99958e-09	0.335206	1	1	0.000101713
Zfpm2	4.32269e-09	0.613716	0.28	0.085	0.00010993
St6gal1	4.3516e-09	0.584447	0.545	0.407	0.000110666
Mrps33	4.58332e-09	-0.274769	0.228	0.463	0.000116558
Peli2	4.6287e-09	-0.264075	0.169	0.367	0.000117712
Slc35f1	4.63614e-09	-0.474035	0.74	0.763	0.000117902
Scg2	4.67687e-09	-0.328558	0.135	0.311	0.000118938
Chd6	4.79545e-09	0.385441	0.912	0.836	0.000121953
Abcc5	4.97231e-09	0.399915	0.856	0.814	0.000126451
Ppp1cb	5.04439e-09	-0.251995	0.312	0.593	0.000128284
Nrg3	5.20356e-09	-0.860869	0.928	0.774	0.000132332
Taf15	5.93271e-09	0.502076	0.697	0.644	0.000150875
Nfe2l3	6.11005e-09	0.588405	0.483	0.333	0.000155385
Astn1	6.18876e-09	-0.331087	0.639	0.763	0.000157386
Trip12	6.49177e-09	0.459356	0.809	0.757	0.000165092
Ctnna3	7.72567e-09	0.542817	0.997	0.994	0.000196471
Slc1a3	8.25684e-09	0.590637	0.345	0.153	0.00020998
Arih1	8.3993e-09	0.439508	0.814	0.706	0.000213603
Trpm7	8.46487e-09	0.409565	0.813	0.797	0.00021527
Hapln2	8.92739e-09	0.689258	0.616	0.52	0.000227032
Sccpdh	8.93024e-09	0.611219	0.52	0.373	0.000227105
Ncor1	9.11499e-09	0.422566	0.928	0.847	0.000231803
Fto	9.4792e-09	0.424369	0.85	0.814	0.000241066
4930511M06Rik	9.7018e-09	0.579274	0.501	0.345	0.000246727
Glrb	1.02222e-08	0.525664	0.651	0.633	0.000259962
Kmt2c	1.06166e-08	0.430032	0.833	0.746	0.000269991
Stard9	1.10332e-08	0.502805	0.364	0.175	0.000280585
Zdhhc14	1.11803e-08	0.452351	0.964	0.938	0.000284326
Grik1	1.26983e-08	0.858887	0.359	0.181	0.00032293
Srgap3	1.35568e-08	0.43719	0.856	0.774	0.000344762
Fkbp3	1.476e-08	-0.25971	0.198	0.412	0.000375363
Xkr6	1.50667e-08	-0.25544	0.697	0.881	0.000383161
A230006K03Rik	1.84111e-08	-0.305149	0.717	0.797	0.000468214
Kndc1	1.87879e-08	0.543879	0.516	0.373	0.000477794
Lrch3	1.91857e-08	0.561397	0.654	0.672	0.000487912
Atp5h	1.99057e-08	-0.266184	0.419	0.74	0.000506222
Ago3	2.07527e-08	0.462186	0.816	0.797	0.000527763
E130308A19Rik	2.17057e-08	0.56061	0.551	0.452	0.000551996
Osbpl1a	2.22834e-08	0.488592	0.695	0.678	0.00056669
Atp2a2	2.22986e-08	-0.363566	0.619	0.842	0.000567075
Luc7l2	2.24368e-08	0.338086	0.997	0.994	0.000570591
Mpzl1	2.57067e-08	0.549769	0.438	0.271	0.000653746
Prpf4b	2.70567e-08	0.373625	0.974	0.876	0.000688079
Ddx24	2.9862e-08	-0.260276	0.546	0.825	0.00075942
Srsf2	3.01783e-08	0.506225	0.715	0.734	0.000767464
Psmc6	3.07459e-08	-0.253227	0.33	0.621	0.000781899
Tuba1a	3.31542e-08	0.496769	0.868	0.797	0.000843144
Dixdc1	3.4177e-08	0.547501	0.673	0.667	0.000869156
Dpyd	3.55189e-08	0.741016	0.376	0.192	0.000903282
S100b	3.70506e-08	0.593748	0.422	0.243	0.000942233
Prox1	3.94764e-08	0.58252	0.468	0.322	0.00100392
Ank	4.06339e-08	0.518789	0.684	0.661	0.00103336
Rnf130	4.20217e-08	0.526673	0.626	0.588	0.00106865
Pnisr	4.61064e-08	0.364362	0.996	0.983	0.00117253
Pld1	4.72869e-08	0.470683	0.384	0.209	0.00120255
Pde4d	4.84735e-08	0.424238	0.685	0.469	0.00123273
Ralgapa2	4.85997e-08	-0.255876	0.473	0.729	0.00123594
Gm48742	4.87796e-08	0.675771	0.433	0.288	0.00124051
Sorcs3	5.73053e-08	-0.297228	0.267	0.492	0.00145733
Ppp1r12a	5.76965e-08	0.389876	0.909	0.881	0.00146728
Macf1	6.14231e-08	0.385981	0.994	0.972	0.00156205
Dusp12	6.5371e-08	-0.257476	0.218	0.424	0.00166245
Ndufs7	6.59327e-08	-0.281685	0.297	0.548	0.00167673
Prkcq	6.81294e-08	0.550282	0.455	0.299	0.0017326
Gkap1	7.05287e-08	0.594431	0.49	0.362	0.00179361
Zcchc18	7.26246e-08	-0.253912	0.441	0.695	0.00184692
Sltm	7.97541e-08	0.41101	0.825	0.836	0.00202823
Csrnp3	8.09182e-08	-0.27656	0.83	0.893	0.00205783
Klf7	8.14178e-08	0.554763	0.584	0.559	0.00207054
Nfix	8.49139e-08	0.537538	0.479	0.345	0.00215945
Myo1e	8.76645e-08	0.504309	0.475	0.311	0.0022294
Lpar1	9.07026e-08	0.534813	0.494	0.345	0.00230666
Rpl17	9.34203e-08	-0.255213	0.316	0.576	0.00237577
Eef1a1	9.39901e-08	0.391728	0.905	0.859	0.00239026
Map1b	9.47513e-08	-0.370381	0.857	0.893	0.00240962
Klf9	9.81582e-08	-0.27525	0.236	0.441	0.00249626
Rtkn2	9.90415e-08	0.517166	0.34	0.164	0.00251872
Zfp638	9.92708e-08	0.471137	0.939	0.932	0.00252456
Gm11149	1.06652e-07	0.481761	0.607	0.514	0.00271226
Rps6ka5	1.10558e-07	0.46163	0.766	0.768	0.0028116
Pex5l	1.28935e-07	0.464513	0.981	0.949	0.00327894
Astn2	1.29732e-07	-0.322673	0.241	0.435	0.00329921
Cox8a	1.36591e-07	-0.37299	0.547	0.802	0.00347364
Oxr1	1.37887e-07	0.512462	0.694	0.627	0.00350661
Clic4	1.45311e-07	0.514031	0.574	0.446	0.0036954
Kcnq1ot1	1.46128e-07	0.511354	0.954	0.842	0.00371617
Hhip	1.6082e-07	0.530268	0.414	0.249	0.00408982
Cox16	1.63128e-07	0.418498	0.836	0.751	0.00414851
Strn3	1.70527e-07	0.399522	0.953	0.927	0.00433666
Cpeb3	1.73809e-07	0.403274	0.901	0.831	0.00442013
Csmd2	1.79734e-07	0.591012	0.599	0.582	0.00457082
Mllt3	1.81916e-07	-0.274729	0.699	0.819	0.00462631
Gpatch8	1.8221e-07	0.353593	0.994	0.977	0.00463379
Picalm	1.87097e-07	0.475395	0.691	0.729	0.00475806
Rsrc1	1.92112e-07	0.449425	0.769	0.768	0.00488559
Rnf43	1.93273e-07	0.495594	0.357	0.192	0.00491513
Tspan9	1.96529e-07	0.550193	0.334	0.164	0.00499794
5031439G07Rik	2.11315e-07	0.518668	0.618	0.599	0.00537394
Cobl	2.22928e-07	-0.269521	0.473	0.746	0.00566929
Tanc1	2.28365e-07	0.501091	0.418	0.26	0.00580754
Prrg1	2.36109e-07	0.558146	0.421	0.266	0.00600449
Phactr4	2.46064e-07	0.494386	0.379	0.215	0.00625766
Cyp2j12	2.46844e-07	0.555098	0.493	0.373	0.00627748
Ttll5	2.47073e-07	0.540734	0.538	0.463	0.00628332
Vps8	2.5135e-07	0.48478	0.523	0.424	0.00639208
Thrb	2.58227e-07	-0.318767	0.665	0.757	0.00656698
Atp1b1	2.60704e-07	-0.250159	0.88	0.893	0.00662997
Scaper	2.80323e-07	0.391353	0.843	0.757	0.00712889
Retreg1	2.81858e-07	0.476686	0.585	0.48	0.00716793
Dnmt3a	2.86386e-07	-0.253137	0.769	0.955	0.00728309
Clk1	2.99921e-07	0.365403	0.888	0.842	0.0076273
Rpl23a	3.11492e-07	-0.250472	0.175	0.35	0.00792154
Bin1	3.13641e-07	0.400058	0.826	0.87	0.0079762
Nbea	3.26366e-07	0.305607	1	1	0.00829981
Pcm1	3.29066e-07	0.355062	0.897	0.859	0.00836848
Gnai1	3.68164e-07	0.513751	0.656	0.678	0.00936278
Cdh18	3.70419e-07	-0.506906	0.831	0.757	0.00942013
Cmtm5	4.15452e-07	0.424991	0.722	0.701	0.0105654
Huwe1	4.34472e-07	0.350542	0.863	0.797	0.0110491
Mal	4.35582e-07	-0.381032	0.749	0.921	0.0110773
Rdx	4.5104e-07	0.535945	0.512	0.412	0.0114704
Prkd3	4.5465e-07	0.426915	0.353	0.186	0.0115622
Ckb	4.56855e-07	-0.336074	0.976	0.994	0.0116183
Cpe	4.76399e-07	-0.298232	0.561	0.751	0.0121153
Cog5	5.01638e-07	0.427754	0.704	0.684	0.0127572
Shroom3	5.07428e-07	0.640608	0.349	0.192	0.0129044
Cuedc1	5.37034e-07	0.502967	0.417	0.282	0.0136573
Tspan7	5.96793e-07	-0.267282	0.867	0.932	0.0151771
Cald1	6.14463e-07	0.470122	0.403	0.249	0.0156264
Mobp	6.57331e-07	0.383276	0.812	0.814	0.0167166
9330117O12Rik	6.85726e-07	0.524442	0.482	0.362	0.0174387
Tmem108	7.29199e-07	0.512935	0.315	0.164	0.0185443
Gab1	7.32697e-07	0.48635	0.654	0.633	0.0186332
Ankrd12	7.398e-07	0.396247	0.93	0.876	0.0188139
Mfn1	8.54312e-07	0.499039	0.384	0.243	0.021726
Cdk19	8.97594e-07	0.429983	0.863	0.876	0.0228267
Rftn1	1.03238e-06	0.466429	0.437	0.288	0.0262543
Amph	1.08476e-06	0.485376	0.681	0.689	0.0275866
Krit1	1.15559e-06	0.383759	0.811	0.819	0.0293878
Rev3l	1.23265e-06	0.415188	0.732	0.701	0.0313475
Arhgap5	1.30378e-06	0.467344	0.658	0.599	0.0331564
Ptgds	1.34082e-06	-0.811249	0.811	0.853	0.0340984
Rps13	1.43243e-06	-0.263597	0.349	0.605	0.0364282
Sned1	1.73358e-06	0.443332	0.328	0.175	0.0440867
Glul	1.77699e-06	-0.264701	0.325	0.548	0.0451905
Synj2	1.77743e-06	0.527247	0.491	0.407	0.0452018
Ctso	1.90481e-06	0.40899	0.327	0.169	0.0484413
Ttyh2	1.91209e-06	0.488423	0.615	0.582	0.0486264
Megf10	1.93132e-06	0.46553	0.45	0.311	0.0491155
Ankub1	1.9433e-06	0.481814	0.374	0.232	0.04942
Cblb	1.95551e-06	0.453696	0.388	0.243	0.0497305
Ywhaz	2.08544e-06	-0.259163	0.55	0.785	0.0530348
Gna12	2.41827e-06	0.450633	0.544	0.469	0.061499
Parp8	2.45557e-06	0.462178	0.366	0.22	0.0624475
Rhobtb3	2.52409e-06	0.442744	0.395	0.254	0.06419
Tcf25	2.67486e-06	0.348719	0.86	0.797	0.0680244
Ugp2	2.84789e-06	0.463998	0.394	0.26	0.0724247
Rbm6	2.8836e-06	0.34119	0.877	0.825	0.0733328
Celf1	2.94915e-06	-0.251526	0.836	0.91	0.0749998
Ankib1	3.07449e-06	0.448834	0.665	0.729	0.0781874
Dmxl1	3.23356e-06	0.371193	0.833	0.831	0.0822327
Fam168a	3.24161e-06	0.331367	0.882	0.836	0.0824373
Rcbtb1	3.26186e-06	0.456175	0.571	0.508	0.0829524
Hnrnpdl	3.28867e-06	0.330226	0.898	0.881	0.0836341
Prrc2c	3.61596e-06	0.298295	0.899	0.853	0.0919575
Mtus1	3.893e-06	0.484304	0.372	0.232	0.0990028
Rnpc3	4.09153e-06	0.352766	0.798	0.74	0.104052
Rplp2	4.36482e-06	-0.269769	0.285	0.492	0.111002
Sema4d	4.45704e-06	0.429104	0.442	0.316	0.113347
Ccdc50	4.5227e-06	0.486589	0.508	0.424	0.115017
Mta3	4.54399e-06	0.452557	0.386	0.254	0.115558
Pstpip2	4.98834e-06	0.507051	0.529	0.458	0.126858
Setd5	5.32756e-06	0.3806	0.795	0.763	0.135485
Eml6	5.46905e-06	0.353141	0.888	0.831	0.139083
Kcnh7	5.68097e-06	-0.386602	0.621	0.689	0.144473
Iqsec1	5.96117e-06	0.366115	0.892	0.881	0.151599
Atad2b	5.96987e-06	0.466167	0.581	0.548	0.15182
Usp25	6.25558e-06	0.465448	0.43	0.316	0.159086
Plxnb3	6.3879e-06	0.345252	0.392	0.249	0.162451
Aopep	6.46337e-06	0.359339	0.885	0.814	0.16437
Tle4	6.71593e-06	-0.324384	0.747	0.842	0.170793
Ncald	6.74603e-06	0.508416	0.42	0.322	0.171558
Lrrc8d	7.06495e-06	0.492378	0.531	0.475	0.179669
Kat2b	7.25529e-06	0.442576	0.479	0.379	0.184509
Sbf2	7.40108e-06	0.35566	0.865	0.774	0.188217
Tasor	7.59092e-06	0.460352	0.604	0.627	0.193045
Atp2c1	8.1224e-06	0.324331	0.902	0.91	0.206561
Nktr	8.64162e-06	0.315398	0.864	0.847	0.219765
Cox6c	9.16647e-06	-0.273487	0.315	0.537	0.233112
Eif2s3y	9.39386e-06	0.470308	0.617	0.633	0.238895
Atp9a	9.79622e-06	0.395634	0.674	0.695	0.249128
Dscam	9.91623e-06	0.487585	0.273	0.13	0.25218
Ugt8a	1.03254e-05	0.39562	0.724	0.706	0.262585
Cpd	1.05323e-05	0.464354	0.468	0.379	0.267847
Rpl19	1.06657e-05	-0.274779	0.446	0.718	0.271238
Klhl4	1.26218e-05	0.465694	0.394	0.277	0.320986
Nek7	1.27122e-05	0.398676	0.304	0.169	0.323284
Sptbn1	1.35523e-05	0.319178	0.977	0.955	0.344648
Ywhaq	1.36147e-05	0.354955	0.76	0.763	0.346237
Rb1	1.46569e-05	0.493091	0.535	0.52	0.372741
Opalin	1.48057e-05	0.451613	0.747	0.712	0.376523
Tnrc6a	1.55264e-05	0.346726	0.802	0.808	0.394853
Slain1	1.57293e-05	0.401573	0.654	0.655	0.400013
Tac1	1.5936e-05	-0.803722	0.453	0.571	0.405268
Pik3r1	1.63769e-05	0.47107	0.589	0.582	0.41648
Lhfpl3	1.72599e-05	-0.327648	0.742	0.763	0.438937
Tjp2	1.96323e-05	0.447617	0.401	0.299	0.499269
Ndufa4	2.06135e-05	-0.27995	0.646	0.842	0.524221
Jakmip3	2.26623e-05	0.427803	0.624	0.689	0.576326
Actb	2.41353e-05	0.439095	0.988	0.983	0.613785
Bcl9	2.53418e-05	0.434621	0.372	0.254	0.644468
Rabgap1l	2.59864e-05	0.353388	0.979	0.938	0.660861
Birc6	2.64645e-05	0.311806	0.847	0.847	0.67302
Cntn3	2.72493e-05	0.421422	0.864	0.718	0.692977
Pla2g4a	2.74525e-05	0.39458	0.273	0.141	0.698145
Micall1	2.7673e-05	0.405483	0.424	0.311	0.703753
Ptpra	2.92806e-05	0.393189	0.663	0.689	0.744634
U2surp	2.94614e-05	0.30506	0.852	0.802	0.749233
Maml2	3.18063e-05	0.481113	0.273	0.147	0.808867
Pacrg	3.45081e-05	-0.29372	0.581	0.853	0.877576
Slc20a2	4.03908e-05	0.412384	0.507	0.463	1
Sirt2	4.0514e-05	0.393584	0.504	0.429	1
Ephb1	4.48178e-05	0.404343	0.907	0.927	1
Cnot4	4.56995e-05	0.330975	0.794	0.751	1
Abhd17b	4.57164e-05	0.343316	0.718	0.768	1
Zfp280d	4.71375e-05	0.314087	0.87	0.842	1
Mboat1	4.93023e-05	0.437798	0.381	0.271	1
Ypel2	4.96638e-05	0.312612	0.912	0.955	1
Nbas	4.98723e-05	0.36452	0.745	0.797	1
Hook3	5.23075e-05	0.405414	0.65	0.706	1
Ubash3b	5.3348e-05	0.427268	0.445	0.328	1
Grb14	5.41881e-05	0.454239	0.63	0.638	1
Sulf2	5.44417e-05	0.384375	0.352	0.232	1
Nfat5	5.46651e-05	0.344761	0.777	0.746	1
Prkg1	5.49427e-05	-0.611468	0.395	0.497	1
Trip11	5.52946e-05	0.452323	0.457	0.412	1
Ncoa1	6.00497e-05	0.339707	0.87	0.853	1
Mdm4	6.1198e-05	0.387099	0.653	0.689	1
Cdk12	6.56949e-05	0.308991	0.772	0.763	1
Fam234a	6.66655e-05	0.378341	0.374	0.26	1
Chd9	6.99878e-05	0.270333	0.92	0.864	1
Gramd3	7.3746e-05	0.374846	0.306	0.186	1
Pbx3	7.69136e-05	-0.303323	0.86	0.853	1
Atp11a	7.79786e-05	0.412586	0.479	0.407	1
Hnrnpu	7.82474e-05	0.282812	0.91	0.859	1
Trim35	8.03119e-05	0.28201	0.932	0.932	1
Carns1	8.25295e-05	0.415386	0.318	0.203	1
Tia1	8.29707e-05	0.270451	0.826	0.802	1
Rps21	8.31585e-05	-0.250337	0.308	0.503	1
Ctif	8.43833e-05	0.405285	0.38	0.282	1
Tenm1	8.77617e-05	-0.409716	0.63	0.672	1
Tmbim1	8.82888e-05	0.368445	0.526	0.452	1
Cul1	9.23151e-05	0.42479	0.592	0.633	1
Zmym4	9.30735e-05	0.314153	0.747	0.746	1
Dusp16	9.54321e-05	0.448475	0.394	0.294	1
Igf1r	9.65522e-05	0.402472	0.659	0.712	1
Galnt6	9.65557e-05	0.386291	0.372	0.266	1
Thsd7a	9.85252e-05	-0.269444	0.945	0.887	1
Abca2	9.90307e-05	0.412935	0.579	0.576	1
Atrx	0.000110883	0.286486	0.89	0.836	1
Usp15	0.000115336	0.338702	0.677	0.695	1
Fth1	0.000116731	0.259553	0.991	0.989	1
Fam155a	0.000117599	-0.451631	0.874	0.712	1
Wdfy2	0.000118074	0.382556	0.412	0.322	1
Epb41l4b	0.000118416	0.348904	0.302	0.186	1
Usp34	0.000119508	0.266398	0.958	0.91	1
Gnao1	0.000119669	0.291219	0.987	0.977	1
Nedd4	0.000126473	0.277742	0.841	0.836	1
Tecr	0.000129335	0.312238	0.83	0.774	1
Rc3h1	0.000132619	0.4333	0.433	0.356	1
Dnajc6	0.000133331	0.345557	0.734	0.74	1
Pcsk6	0.000138375	0.381501	0.342	0.232	1
Psd3	0.000145807	0.296653	0.911	0.887	1
Acap2	0.000146202	0.288653	0.955	0.927	1
Golim4	0.000147631	0.379338	0.251	0.141	1
Sec61a2	0.000148275	0.432839	0.538	0.542	1
Cpeb2	0.000155698	0.427131	0.541	0.525	1
Nsd3	0.000160367	0.283615	0.846	0.825	1
Trim2	0.000162567	0.323484	0.965	0.915	1
Fam49b	0.000167079	0.28707	0.826	0.768	1
Ralgapa1	0.000180142	0.260963	0.943	0.921	1
[truncated: 223 more rows]

## Sheet: thiamine_cluster4R61vvsNTv
Column1	p_val	avg_log2FC	pct.1	pct.2	p_val_adj
Malat1	8.31091e-110	-0.825722	1	1	2.11355e-105
Pcp4	1.15776e-87	-1.53163	0.573	0.924	2.9443e-83
Ckb	1.30938e-68	-1.19467	0.736	0.959	3.32989e-64
Cmss1	9.74621e-64	-0.927376	0.982	1	2.47856e-59
Penk	5.1253e-62	-1.35195	0.318	0.751	1.30341e-57
Inf2	2.5395e-55	-0.946805	0.217	0.641	6.4582e-51
Cadm1	9.96998e-55	1.24464	0.89	0.672	2.53547e-50
Frmd4a	1.83307e-54	0.761078	0.995	0.962	4.66169e-50
Meg3	3.25432e-54	0.558081	0.999	1	8.27606e-50
Lrrk2	2.90633e-48	-0.906779	0.35	0.725	7.39109e-44
Gm49906	1.57957e-44	-0.990708	0.295	0.684	4.017e-40
Sema5b	2.45292e-44	-0.929734	0.243	0.626	6.23802e-40
March1	1.19187e-43	1.50853	0.695	0.331	3.03103e-39
Nrgn	4.65062e-43	-1.05978	0.558	0.835	1.1827e-38
Cntnap2	2.04008e-42	0.786324	0.994	0.977	5.18812e-38
Lrfn5	4.37781e-42	0.959892	0.933	0.763	1.11332e-37
Rian	7.49546e-41	0.590569	0.987	0.98	1.90617e-36
Calm2	9.62613e-41	-0.733151	0.909	0.982	2.44802e-36
Rgs9	4.40665e-40	-1.26615	0.507	0.758	1.12065e-35
Gabrb1	2.24591e-39	0.694076	0.976	0.86	5.71157e-35
Gpr88	1.33303e-38	-0.835466	0.292	0.631	3.39003e-34
Cnksr2	2.97741e-38	-0.76915	0.783	0.931	7.57186e-34
Slc35f1	1.27547e-37	-0.836864	0.916	0.957	3.24365e-33
Foxp2	1.33897e-37	-0.874005	0.675	0.906	3.40512e-33
Ppp1r1b	1.70725e-37	-0.635069	0.183	0.514	4.34172e-33
Ptms	3.95462e-37	-0.645302	0.43	0.758	1.0057e-32
Grin2a	8.82804e-37	-0.731555	0.868	0.972	2.24506e-32
Ier5l	5.92193e-36	-0.412014	0.087	0.377	1.50601e-31
Plcb1	8.41837e-34	-0.635416	0.948	0.99	2.14088e-29
A230057D06Rik	1.35698e-33	0.65416	0.942	0.812	3.45093e-29
Mgat4c	2.91623e-33	1.30106	0.83	0.628	7.41626e-29
Slc2a13	4.08509e-33	-0.838362	0.779	0.919	1.03888e-28
Scn4b	6.22277e-33	-0.38222	0.047	0.285	1.58251e-28
Atp2b2	6.50772e-33	-0.570176	0.851	0.972	1.65498e-28
Phactr1	9.12921e-33	-1.18189	0.983	0.99	2.32165e-28
Gabrd	3.44698e-32	-0.403673	0.078	0.341	8.76603e-28
Sfmbt2	1.44993e-31	0.591155	0.422	0.089	3.68731e-27
Cdr1os	1.79217e-31	0.567334	0.988	0.952	4.55767e-27
Ctnnd2	1.83225e-31	0.47337	0.996	0.977	4.65959e-27
Gnb5	2.7836e-31	-0.567349	0.427	0.73	7.07899e-27
Calm1	3.87633e-31	-0.659893	0.866	0.962	9.8579e-27
Pde4b	4.17451e-31	-0.760365	0.919	0.964	1.06162e-26
Rab3b	4.69238e-31	-0.571531	0.185	0.494	1.19332e-26
Drd1	5.82172e-31	-0.685884	0.233	0.529	1.48052e-26
Necab1	9.42301e-31	-1.08464	0.513	0.758	2.39637e-26
Atp2b1	1.04484e-30	-0.756543	0.927	0.982	2.65714e-26
Grid2	1.82685e-30	0.747784	0.965	0.86	4.64585e-26
Baiap3	1.90761e-30	0.740305	0.455	0.125	4.85125e-26
Camk1d	1.93353e-30	-0.600575	0.893	0.967	4.91717e-26
Dcc	1.12806e-29	0.816543	0.958	0.888	2.86877e-25
Zfhx3	1.15351e-29	1.38516	0.541	0.232	2.93348e-25
Tmod1	4.82096e-29	-0.521175	0.184	0.481	1.22602e-24
Magi2	4.85762e-29	0.447044	0.999	1	1.23534e-24
Mir99ahg	8.80915e-29	0.74265	0.873	0.718	2.24026e-24
Egr1	3.5919e-28	-0.588954	0.121	0.384	9.13455e-24
Dpyd	8.2559e-28	0.963994	0.666	0.361	2.09956e-23
Snhg14	1.20066e-27	0.426462	0.998	0.992	3.0534e-23
Tshz1	1.46886e-27	-0.660092	0.46	0.768	3.73547e-23
C130073E24Rik	1.9923e-27	0.743673	0.689	0.369	5.06662e-23
Gpr158	3.19075e-27	-0.612868	0.921	0.98	8.11439e-23
Pmepa1	3.25191e-27	-0.561397	0.162	0.433	8.26993e-23
Pde10a	3.86862e-27	-1.36692	0.851	0.921	9.83828e-23
Gm15810	8.51833e-27	-0.756599	0.321	0.578	2.1663e-22
Plxdc1	1.18092e-26	-0.39431	0.101	0.346	3.00319e-22
Ngef	1.23075e-26	-0.518818	0.34	0.626	3.12992e-22
Sorcs2	1.31877e-26	-0.789965	0.468	0.718	3.35377e-22
Syndig1l	2.53422e-26	-0.405619	0.088	0.323	6.44477e-22
Ank2	2.65206e-26	0.330941	1	1	6.74446e-22
Nrxn1	5.14475e-26	0.313833	1	1	1.30836e-21
Prkn	6.75106e-26	0.539307	0.95	0.855	1.71686e-21
Otof	8.07995e-26	-0.696385	0.295	0.56	2.05481e-21
Ptprd	8.76773e-26	1.02659	0.934	0.898	2.22972e-21
Hpca	1.43095e-25	-0.478019	0.203	0.476	3.63904e-21
Rasgrp1	1.48186e-25	-0.579871	0.33	0.611	3.76852e-21
Ndrg4	1.63964e-25	-0.524881	0.751	0.924	4.16976e-21
Scaper	2.09516e-25	0.517204	0.882	0.74	5.32819e-21
Ccdc85a	4.50726e-25	0.69782	0.639	0.344	1.14624e-20
Dynll1	8.13079e-25	-0.550053	0.438	0.707	2.06774e-20
Inka2	1.12068e-24	-0.32732	0.053	0.252	2.85e-20
Ppp3ca	1.33414e-24	-0.47352	0.986	0.992	3.39284e-20
Cplx2	1.99762e-24	-0.503582	0.403	0.677	5.08014e-20
Cntnap5a	3.03312e-24	0.848106	0.758	0.517	7.71352e-20
Slc4a4	3.07734e-24	-0.629355	0.507	0.774	7.82598e-20
Celf2	3.56742e-24	-0.614837	0.989	0.997	9.07231e-20
Nlgn1	3.68086e-24	0.530004	0.987	0.934	9.3608e-20
Negr1	5.0077e-24	0.52142	0.999	0.995	1.27351e-19
Etl4	5.69305e-24	-0.640603	0.762	0.949	1.4478e-19
Kcnb2	6.1401e-24	0.472841	0.788	0.499	1.56149e-19
Ogt	6.22199e-24	0.469312	0.955	0.85	1.58231e-19
Baiap2	6.37944e-24	-0.602476	0.487	0.723	1.62236e-19
Chst9	6.52208e-24	-0.993032	0.134	0.369	1.65863e-19
Lpp	1.07352e-23	0.480668	0.382	0.097	2.73007e-19
Zswim6	1.08294e-23	-0.716139	0.656	0.837	2.75402e-19
Npas2	1.21032e-23	-0.596839	0.287	0.547	3.07797e-19
Gprin3	1.54844e-23	-0.787828	0.496	0.715	3.93785e-19
Pcp4l1	4.07047e-23	-0.501661	0.203	0.458	1.03516e-18
Luc7l2	5.44656e-23	0.40797	0.999	0.99	1.38512e-18
Epha5	5.87318e-23	0.648121	0.893	0.723	1.49361e-18
Upp2	8.87464e-23	0.526721	0.895	0.799	2.25691e-18
Ppp2r2b	2.18884e-22	0.493308	0.962	0.891	5.56645e-18
Osbpl8	2.40651e-22	-0.655222	0.741	0.863	6.12e-18
Limch1	2.97902e-22	0.547366	0.675	0.412	7.57593e-18
Slc8a1	3.01056e-22	0.684845	0.89	0.738	7.65615e-18
Ramp1	3.13094e-22	-0.459205	0.193	0.44	7.96228e-18
Neto1	3.37299e-22	-0.591895	0.706	0.86	8.57785e-18
Tac1	3.97714e-22	-1.29256	0.471	0.662	1.01143e-17
Meis2	4.63201e-22	-0.527134	0.827	0.947	1.17797e-17
Mt1	4.82243e-22	-0.586511	0.272	0.524	1.22639e-17
Adamts3	6.99793e-22	-0.604226	0.521	0.753	1.77964e-17
2010300C02Rik	1.01759e-21	-0.534051	0.456	0.69	2.58784e-17
Rbm39	1.2032e-21	0.338379	0.996	0.992	3.05986e-17
Dpysl3	1.48979e-21	0.446737	0.422	0.142	3.78868e-17
Fkbp1a	1.63298e-21	-0.488718	0.487	0.73	4.15284e-17
A330076H08Rik	2.00797e-21	0.52944	0.79	0.598	5.10648e-17
Gnas	2.02112e-21	0.590089	0.831	0.626	5.13992e-17
Rmst	2.53173e-21	0.856395	0.461	0.173	6.43844e-17
Pbx3	2.67066e-21	-0.597019	0.785	0.908	6.79175e-17
Rgs7bp	3.03879e-21	-0.583443	0.75	0.901	7.72796e-17
Tenm2	4.41858e-21	0.635012	0.962	0.911	1.12369e-16
Gpr83	5.41205e-21	-0.349833	0.094	0.3	1.37634e-16
Brinp3	6.30022e-21	0.781019	0.718	0.453	1.60221e-16
Kcnq1ot1	6.94897e-21	0.447367	0.954	0.88	1.76719e-16
Dlx6os1	8.60869e-21	-0.512221	0.447	0.695	2.18928e-16
Gkap1	9.22244e-21	0.516957	0.679	0.427	2.34536e-16
Snhg11	1.28519e-20	0.342113	1	1	3.26836e-16
Srgap3	1.51164e-20	0.429303	0.895	0.707	3.84426e-16
Nr4a1	1.6236e-20	-0.508903	0.123	0.336	4.12897e-16
Tshz2	2.37504e-20	0.80684	0.422	0.15	6.03997e-16
Lhfpl3	2.52149e-20	0.599307	0.913	0.817	6.41239e-16
Pla2g3	2.93199e-20	-0.419284	0.169	0.399	7.45633e-16
Pak3	3.05352e-20	0.509275	0.864	0.723	7.76542e-16
Wsb1	3.19961e-20	0.464701	0.711	0.478	8.13694e-16
Camkv	3.8744e-20	-0.492392	0.447	0.682	9.85298e-16
Ube3a	3.90268e-20	0.337073	0.998	0.997	9.9249e-16
Ivns1abp	4.76576e-20	-0.558203	0.354	0.585	1.21198e-15
Nav3	4.94741e-20	0.42577	0.986	0.959	1.25818e-15
Strip2	5.08359e-20	-0.541782	0.23	0.466	1.29281e-15
C530008M17Rik	6.65415e-20	0.520759	0.584	0.3	1.69222e-15
Efna5	7.49727e-20	0.87965	0.499	0.244	1.90663e-15
Cdh13	8.45878e-20	-0.665948	0.612	0.837	2.15115e-15
Tra2a	9.39377e-20	0.41469	0.935	0.842	2.38893e-15
Gad1	1.01233e-19	-0.499024	0.642	0.837	2.57446e-15
Smc2	1.05859e-19	0.44143	0.394	0.145	2.69209e-15
Gm42418	1.11719e-19	-0.374895	1	1	2.84114e-15
Gm45323	1.4389e-19	0.493706	0.427	0.165	3.65928e-15
Pcsk2	1.48097e-19	-0.651993	0.718	0.901	3.76627e-15
4930555F03Rik	1.49343e-19	0.642247	0.555	0.277	3.79795e-15
Gm28494	1.89001e-19	-0.455615	0.119	0.328	4.80649e-15
AI480526	2.15933e-19	0.401619	0.534	0.27	5.4914e-15
Gpm6b	2.32891e-19	-0.587744	0.693	0.835	5.92264e-15
Htr2c	2.47965e-19	0.902986	0.486	0.242	6.30599e-15
Mycbp2	2.50739e-19	0.31535	0.995	0.995	6.37653e-15
Gria4	3.3561e-19	0.446872	0.971	0.901	8.53491e-15
Actn2	3.56554e-19	-0.513088	0.191	0.415	9.06751e-15
Kcnh3	3.85485e-19	-0.336703	0.14	0.359	9.80327e-15
Aldoa	4.82869e-19	-0.503141	0.709	0.873	1.22798e-14
Adgrb1	5.17536e-19	-0.43463	0.425	0.649	1.31615e-14
Ahi1	6.46747e-19	0.347733	1	0.997	1.64474e-14
Khdrbs3	6.57895e-19	-0.51021	0.58	0.791	1.67309e-14
Junb	8.17739e-19	-0.709983	0.154	0.379	2.07959e-14
Dscam	1.16201e-18	0.64474	0.763	0.57	2.95511e-14
Sema3e	1.22849e-18	-0.77739	0.301	0.527	3.12416e-14
Slc9a9	1.44114e-18	0.552515	0.388	0.14	3.66495e-14
Nckap5	1.62029e-18	0.601226	0.328	0.102	4.12055e-14
Deptor	1.71363e-18	-0.480178	0.189	0.41	4.35793e-14
Gnal	1.80932e-18	-0.573962	0.77	0.868	4.60128e-14
Clasp2	1.89506e-18	0.402535	0.912	0.791	4.81934e-14
Guf1	1.97471e-18	0.435591	0.581	0.341	5.0219e-14
Gabrg1	1.98944e-18	0.502836	0.381	0.13	5.05936e-14
Eml6	2.03598e-18	0.433474	0.908	0.809	5.1777e-14
Erbb4	2.1048e-18	-0.779867	0.763	0.888	5.35272e-14
Homer1	2.25762e-18	-0.704482	0.512	0.705	5.74135e-14
Trpm3	2.60383e-18	-0.568563	0.809	0.916	6.62181e-14
Ctxn1	2.71526e-18	-0.411293	0.21	0.433	6.90517e-14
Gm13974	2.99058e-18	-0.534952	0.178	0.397	7.60535e-14
Jcad	3.03169e-18	-0.307553	0.094	0.282	7.7099e-14
Cx3cl1	3.4438e-18	-0.463041	0.469	0.679	8.75793e-14
Grin1	3.68341e-18	-0.367956	0.875	0.962	9.36727e-14
Glra3	3.68808e-18	0.544968	0.277	0.064	9.37916e-14
C1qtnf4	4.77297e-18	-0.496899	0.691	0.863	1.21381e-13
Msra	4.80593e-18	-0.468901	0.617	0.832	1.2222e-13
Taf15	5.52714e-18	0.420836	0.785	0.593	1.40561e-13
Pde7b	5.81665e-18	-0.703229	0.682	0.794	1.47923e-13
Gm45321	6.48301e-18	0.544997	0.448	0.198	1.64869e-13
Fgf12	6.95947e-18	0.42648	0.979	0.885	1.76986e-13
Fam155a	7.69023e-18	0.310502	0.996	0.985	1.9557e-13
Xkr4	7.69487e-18	0.298883	0.98	0.931	1.95688e-13
Ptk2b	8.16103e-18	-0.435521	0.351	0.58	2.07543e-13
Lypd1	8.43539e-18	-0.56066	0.383	0.611	2.1452e-13
Arpp21	1.10789e-17	-0.427593	0.863	0.949	2.81747e-13
Itpka	1.17707e-17	-0.346711	0.121	0.316	2.99342e-13
Unc5c	1.29228e-17	0.634011	0.751	0.506	3.28641e-13
Dbp	1.29373e-17	-0.321997	0.116	0.31	3.29008e-13
Cadm2	1.44772e-17	-0.452991	0.985	0.992	3.6817e-13
Zfhx4	1.56322e-17	0.552884	0.486	0.244	3.97542e-13
Hivep2	1.67167e-17	-0.40523	0.949	0.975	4.25124e-13
Car11	1.7575e-17	-0.437607	0.434	0.639	4.4695e-13
A330015K06Rik	1.86394e-17	-0.524987	0.509	0.723	4.74018e-13
Tesc	1.96771e-17	-0.342383	0.137	0.341	5.00409e-13
Xylt1	2.10246e-17	-0.53296	0.517	0.718	5.34677e-13
Gm20754	2.34307e-17	0.798869	0.373	0.148	5.95865e-13
Grik1	2.82587e-17	0.658731	0.317	0.097	7.18646e-13
Pde1b	2.8878e-17	-0.513077	0.27	0.476	7.34396e-13
Smpd3	3.37403e-17	-0.489683	0.443	0.646	8.58049e-13
Ankrd33b	3.84257e-17	-0.401491	0.184	0.399	9.77205e-13
Ttc28	4.16339e-17	0.428499	0.491	0.242	1.05879e-12
Stk3	4.21895e-17	0.400305	0.467	0.221	1.07292e-12
Sntg1	5.82572e-17	0.365117	0.988	0.985	1.48154e-12
Kmt2c	6.64413e-17	0.355562	0.836	0.677	1.68967e-12
Slc8a3	6.68265e-17	0.478889	0.483	0.244	1.69947e-12
Scn9a	6.87866e-17	0.453732	0.538	0.275	1.74931e-12
Rtl4	7.55653e-17	0.791427	0.38	0.15	1.9217e-12
Npffr2	7.81494e-17	-0.373544	0.094	0.277	1.98742e-12
Cplane1	9.93552e-17	0.395673	0.909	0.858	2.5267e-12
Rbm20	1.11158e-16	-0.510975	0.16	0.361	2.82686e-12
Elmo1	1.28457e-16	-0.482322	0.726	0.878	3.2668e-12
Sec14l1	1.39644e-16	-0.375769	0.197	0.407	3.55129e-12
4930402H24Rik	1.71711e-16	0.357811	0.94	0.847	4.36678e-12
9630028H03Rik	1.74199e-16	-0.546349	0.632	0.791	4.43007e-12
Pvt1	1.9904e-16	0.524488	0.466	0.242	5.06179e-12
Mir670hg	2.41224e-16	-0.642883	0.329	0.524	6.13456e-12
A330102I10Rik	2.46046e-16	0.447076	0.442	0.198	6.25721e-12
Frmpd3	2.53859e-16	0.426081	0.337	0.12	6.45588e-12
Ndufa4	2.98626e-16	-0.542193	0.624	0.791	7.59436e-12
Camk2d	3.23912e-16	0.560461	0.823	0.664	8.23741e-12
Mdga1	3.29495e-16	-0.348488	0.147	0.349	8.3794e-12
Pip5k1b	3.36471e-16	0.494905	0.436	0.206	8.55679e-12
Cpne5	4.06276e-16	-0.47684	0.468	0.677	1.0332e-11
Apc	4.15272e-16	0.32471	0.949	0.901	1.05608e-11
Per1	4.40843e-16	-0.296787	0.096	0.27	1.12111e-11
Mast4	6.68025e-16	0.608859	0.643	0.412	1.69886e-11
Cdh18	7.13026e-16	0.636016	0.897	0.784	1.8133e-11
Btbd11	7.9162e-16	0.436868	0.316	0.104	2.01317e-11
D030068K23Rik	9.58025e-16	0.567461	0.466	0.234	2.43635e-11
Exoc6b	1.11096e-15	0.370306	0.908	0.766	2.82529e-11
Cep112	1.13226e-15	0.62983	0.502	0.272	2.87946e-11
C79798	1.20275e-15	-0.410494	0.348	0.573	3.05871e-11
AW551984	1.31168e-15	0.284853	0.251	0.059	3.33572e-11
Tenm3	1.34503e-15	0.380513	0.86	0.674	3.42056e-11
Klhl1	1.51137e-15	0.619529	0.304	0.099	3.84357e-11
Macf1	1.53957e-15	0.33154	0.986	0.975	3.91528e-11
Atp1a1	1.68738e-15	-0.4642	0.425	0.626	4.29118e-11
Frmd5	1.77057e-15	0.437875	0.789	0.555	4.50273e-11
Nsun7	1.78095e-15	0.40024	0.45	0.226	4.52913e-11
Ccdc85b	2.13107e-15	-0.327835	0.216	0.42	5.41953e-11
Fstl5	2.17327e-15	0.567373	0.425	0.186	5.52685e-11
Adcy5	2.18174e-15	-0.661195	0.496	0.651	5.54838e-11
Ryr1	2.47421e-15	-0.504446	0.3	0.494	6.29217e-11
Cttnbp2	2.57474e-15	-0.316074	0.892	0.975	6.54783e-11
Elob	2.60605e-15	-0.406564	0.417	0.636	6.62744e-11
Dnajc6	2.89219e-15	0.411947	0.789	0.677	7.35513e-11
Zadh2	2.95146e-15	-0.349283	0.258	0.476	7.50586e-11
Cntnap4	3.7639e-15	0.515261	0.336	0.125	9.57198e-11
Scml4	3.81194e-15	0.332864	0.323	0.112	9.69414e-11
Ttyh1	4.10943e-15	-0.429055	0.401	0.601	1.04507e-10
Klf9	5.0838e-15	-0.380654	0.244	0.45	1.29286e-10
Rbm5	5.18606e-15	0.372354	0.844	0.723	1.31887e-10
Myt1l	5.46392e-15	-0.336903	0.988	0.995	1.38953e-10
Efcab1	5.82203e-15	0.370639	0.334	0.127	1.4806e-10
Rbm28	5.89233e-15	0.42616	0.695	0.527	1.49848e-10
Socs2	8.3757e-15	-0.295227	0.193	0.405	2.13002e-10
Gmds	9.08775e-15	0.385814	0.75	0.552	2.31111e-10
Nrp2	9.21963e-15	0.457541	0.409	0.188	2.34464e-10
Fmnl2	9.30931e-15	0.415307	0.634	0.41	2.36745e-10
Elavl2	9.3162e-15	0.49573	0.439	0.209	2.3692e-10
Ankrd55	9.53347e-15	0.381046	0.358	0.142	2.42446e-10
Kank3	9.66889e-15	-0.280321	0.091	0.252	2.4589e-10
Dock9	1.06469e-14	0.403008	0.621	0.415	2.70761e-10
Pdzrn4	1.08112e-14	0.542784	0.577	0.313	2.7494e-10
Lingo2	1.12251e-14	0.684232	0.867	0.766	2.85465e-10
Cacnb4	1.12343e-14	-0.364886	0.867	0.954	2.85698e-10
Ftx	1.33378e-14	0.367512	0.912	0.809	3.39192e-10
Hjurp	1.68403e-14	0.377355	0.553	0.344	4.28265e-10
Hs6st2	1.80033e-14	-0.51381	0.656	0.817	4.57842e-10
Rbfox3	2.00565e-14	-0.372766	0.805	0.911	5.10056e-10
Zbtb20	2.00578e-14	0.573773	0.92	0.802	5.10089e-10
Wipf3	2.14951e-14	-0.376307	0.364	0.575	5.46643e-10
Slit2	2.16693e-14	0.58283	0.44	0.226	5.51071e-10
Rtn3	2.44899e-14	0.307886	0.98	0.957	6.22802e-10
Greb1l	2.64876e-14	0.486075	0.422	0.206	6.73607e-10
Cacna1b	2.83967e-14	0.366419	0.804	0.674	7.22156e-10
Ncam1	2.9777e-14	0.315471	0.986	0.957	7.5726e-10
Syn3	3.19734e-14	0.420316	0.761	0.611	8.13115e-10
Parp8	3.34655e-14	0.386641	0.636	0.44	8.5106e-10
Kctd1	3.39509e-14	-0.429868	0.501	0.687	8.63406e-10
Diaph2	3.98888e-14	-0.453366	0.821	0.888	1.01441e-09
Tmem108	4.35647e-14	0.460092	0.467	0.242	1.10789e-09
Miat	5.32456e-14	0.340268	0.56	0.341	1.35409e-09
Camk2a	5.87135e-14	-0.383668	0.82	0.908	1.49314e-09
Gas7	6.29731e-14	-0.332707	0.375	0.595	1.60147e-09
Gm26871	8.0134e-14	0.398719	0.936	0.86	2.03789e-09
Zfyve28	8.03695e-14	-0.339684	0.368	0.578	2.04388e-09
Itga11	8.1439e-14	-0.268871	0.094	0.252	2.07107e-09
Crppa	8.42904e-14	0.369602	0.433	0.219	2.14359e-09
Fbxl16	9.75509e-14	-0.339232	0.302	0.511	2.48082e-09
Arpp19	9.91056e-14	-0.421282	0.337	0.524	2.52035e-09
Stac2	1.03451e-13	-0.295903	0.131	0.303	2.63086e-09
Brinp2	1.06721e-13	-0.442988	0.447	0.641	2.71403e-09
Sgcz	1.11195e-13	0.670355	0.899	0.802	2.8278e-09
Prpf4b	1.19154e-13	0.339214	0.956	0.921	3.03021e-09
Gabra4	1.33518e-13	-0.381329	0.428	0.628	3.39549e-09
Pde1a	1.36897e-13	0.509209	0.787	0.611	3.48143e-09
Unc13c	1.39859e-13	-0.466995	0.631	0.794	3.55676e-09
Pde2a	1.40822e-13	-0.416744	0.443	0.644	3.58123e-09
Resp18	1.51213e-13	0.587097	0.519	0.326	3.84549e-09
Rims1	1.88916e-13	0.276214	0.983	0.964	4.80433e-09
Usp34	1.9874e-13	0.279563	0.961	0.891	5.05415e-09
Gm11844	2.28556e-13	-0.320782	0.14	0.318	5.81241e-09
Nek1	2.43801e-13	0.36048	0.596	0.384	6.20011e-09
Gls	2.89717e-13	0.30028	0.941	0.878	7.36778e-09
Nhs	2.94493e-13	0.408195	0.663	0.466	7.48926e-09
Eif1	3.15189e-13	-0.417108	0.774	0.868	8.01558e-09
Wscd2	3.26151e-13	-0.424326	0.414	0.59	8.29434e-09
Sgip1	3.47229e-13	0.283419	0.986	0.964	8.83038e-09
Fggy	3.64212e-13	0.305908	0.282	0.097	9.26228e-09
Smad3	3.93236e-13	-0.308703	0.138	0.305	1.00004e-08
Edil3	4.01497e-13	0.451046	0.713	0.506	1.02105e-08
Tmem130	4.02232e-13	0.405988	0.698	0.529	1.02292e-08
AI593442	4.10499e-13	-0.346774	0.238	0.422	1.04394e-08
Ptpn5	4.73384e-13	-0.389279	0.547	0.72	1.20386e-08
Stmn2	4.85949e-13	0.366872	0.625	0.415	1.23582e-08
Usp2	4.86436e-13	-0.300779	0.179	0.359	1.23706e-08
Tia1	4.99117e-13	0.330453	0.899	0.804	1.2693e-08
Cnrip1	5.26282e-13	0.36282	0.552	0.349	1.33839e-08
Gdpd5	5.48732e-13	-0.314043	0.211	0.399	1.39548e-08
Dgkz	5.58769e-13	-0.343163	0.323	0.511	1.42101e-08
Thsd7a	6.59138e-13	0.537885	0.522	0.321	1.67625e-08
Nkain2	6.8524e-13	0.334153	0.992	1	1.74263e-08
Chn2	7.09861e-13	-0.436461	0.581	0.763	1.80525e-08
Kcnh7	7.23939e-13	0.557192	0.814	0.628	1.84105e-08
Arhgef3	7.49681e-13	-0.347801	0.275	0.476	1.90651e-08
Bcl11b	7.6246e-13	-0.392669	0.591	0.748	1.93901e-08
Ppp1r1a	7.7775e-13	-0.320034	0.198	0.379	1.9779e-08
Zmym4	8.11135e-13	0.336187	0.844	0.735	2.0628e-08
Rprml	8.98752e-13	-0.374283	0.252	0.438	2.28562e-08
Camk2n1	9.56737e-13	-0.373782	0.3	0.491	2.43308e-08
Gm47423	9.82384e-13	-0.442829	0.208	0.387	2.4983e-08
Wdr17	1.02457e-12	0.366037	0.676	0.509	2.60558e-08
Rock1	1.04228e-12	0.329554	0.847	0.728	2.65062e-08
Pitpnc1	1.1224e-12	-0.406631	0.525	0.7	2.85437e-08
Kcnq3	1.15825e-12	-0.330478	0.857	0.934	2.94555e-08
Slc8a2	1.17301e-12	-0.301846	0.243	0.427	2.98308e-08
Arhgap24	1.5055e-12	0.442184	0.25	0.081	3.82863e-08
Prickle1	1.56814e-12	-0.365038	0.823	0.924	3.98793e-08
R3hdm1	1.62114e-12	-0.372264	0.986	0.982	4.12271e-08
Klhdc10	1.65331e-12	0.365619	0.797	0.705	4.20453e-08
Gulp1	1.68253e-12	0.466599	0.401	0.196	4.27885e-08
Alk	1.69479e-12	-0.624108	0.469	0.616	4.31003e-08
Unc13b	1.86328e-12	0.305503	0.375	0.173	4.7385e-08
Cacna2d3	1.95271e-12	-0.413397	0.816	0.926	4.96593e-08
Cdh2	1.99011e-12	0.405729	0.801	0.667	5.06105e-08
Mtcl1	2.04622e-12	-0.37413	0.321	0.509	5.20373e-08
Garnl3	2.13843e-12	0.414723	0.537	0.326	5.43823e-08
Gprasp2	2.24878e-12	0.331952	0.557	0.351	5.71888e-08
Gm2516	2.30574e-12	0.413919	0.448	0.244	5.86374e-08
B830012L14Rik	2.41641e-12	0.392733	0.69	0.532	6.14517e-08
Dync1i1	2.45313e-12	0.338323	0.893	0.812	6.23854e-08
Arhgap10	2.61786e-12	-0.293388	0.211	0.397	6.65747e-08
Gsg1l	3.02945e-12	-0.294357	0.158	0.326	7.7042e-08
Ppfia2	3.05329e-12	0.310971	0.978	0.949	7.76482e-08
Ranbp17	3.8364e-12	0.372166	0.599	0.415	9.75634e-08
Adam22	4.10934e-12	0.325926	0.89	0.807	1.04505e-07
Acadsb	4.1543e-12	0.359383	0.517	0.326	1.05648e-07
Dennd1a	4.1833e-12	0.262913	0.962	0.906	1.06386e-07
Rxrg	4.56084e-12	-0.490242	0.305	0.471	1.15987e-07
Mtss1	4.69494e-12	0.325298	0.512	0.308	1.19397e-07
Prmt2	4.70652e-12	0.300464	0.415	0.216	1.19692e-07
Kif26b	5.10344e-12	0.400221	0.417	0.224	1.29786e-07
Kcnma1	5.29819e-12	0.285852	0.974	0.952	1.34738e-07
Gm15813	5.45451e-12	-0.287105	0.119	0.272	1.38714e-07
Dner	6.21845e-12	0.392607	0.599	0.394	1.58141e-07
Ankrd44	6.66616e-12	0.298766	0.36	0.168	1.69527e-07
Nova1	6.7827e-12	0.484697	0.638	0.491	1.72491e-07
Hlf	7.03725e-12	-0.31428	0.249	0.427	1.78964e-07
Rpl24	7.23894e-12	-0.393861	0.489	0.656	1.84093e-07
Nktr	7.74928e-12	0.334312	0.861	0.756	1.97072e-07
Gnaq	7.87844e-12	0.295208	0.888	0.784	2.00357e-07
Ehbp1	8.49698e-12	0.336228	0.854	0.758	2.16087e-07
Chchd2	8.82864e-12	-0.354235	0.485	0.662	2.24521e-07
Pde4a	9.40243e-12	-0.354982	0.419	0.588	2.39113e-07
Cdh7	9.49002e-12	0.453355	0.346	0.17	2.41341e-07
Slc24a3	9.50197e-12	0.403716	0.683	0.522	2.41645e-07
Daam1	9.70324e-12	0.340717	0.567	0.379	2.46763e-07
Atp2b4	1.0475e-11	-0.408475	0.539	0.707	2.6639e-07
2610035D17Rik	1.12312e-11	0.298168	0.384	0.196	2.8562e-07
Trpc5	1.18842e-11	0.492269	0.312	0.137	3.02226e-07
Atad2b	1.2321e-11	0.349729	0.741	0.593	3.13337e-07
Tmsb4x	1.36888e-11	-0.372284	0.571	0.728	3.4812e-07
Map2	1.49362e-11	0.305907	0.974	0.944	3.79842e-07
Slc39a10	1.52238e-11	-0.330288	0.348	0.534	3.87157e-07
Fgd4	1.78314e-11	0.304553	0.508	0.305	4.5347e-07
Adarb2	1.81085e-11	-0.440068	0.717	0.896	4.60517e-07
Actb	1.97852e-11	-0.4123	0.791	0.891	5.03158e-07
Lcorl	2.10417e-11	0.446731	0.58	0.402	5.35111e-07
Mpped2	2.3304e-11	-0.36029	0.759	0.88	5.92644e-07
Sez6	2.47783e-11	-0.334646	0.434	0.613	6.30137e-07
Peli2	2.48864e-11	-0.286728	0.182	0.349	6.32886e-07
Camk2b	2.51873e-11	-0.316416	0.63	0.776	6.40538e-07
Khdrbs2	2.52691e-11	0.486327	0.706	0.545	6.42619e-07
Bicd1	2.64892e-11	0.309407	0.9	0.802	6.73647e-07
Gm32647	2.71155e-11	1.29911	0.387	0.211	6.89575e-07
Gm40663	2.73363e-11	-0.367165	0.188	0.366	6.95189e-07
Prkce	2.92087e-11	-0.297335	0.938	0.972	7.42808e-07
Grm1	3.21496e-11	0.536102	0.578	0.417	8.17597e-07
Prrc2c	3.23682e-11	0.294176	0.887	0.791	8.23156e-07
Gm9801	3.42196e-11	0.3191	0.57	0.387	8.70239e-07
Tmem132d	3.57804e-11	0.508271	0.394	0.219	9.09932e-07
Arid5b	4.21302e-11	0.366837	0.587	0.392	1.07141e-06
AY036118	5.04269e-11	-0.332152	0.998	1	1.28241e-06
Cntnap3	5.16179e-11	-0.373894	0.167	0.326	1.31269e-06
Gng7	5.20815e-11	-0.402471	0.379	0.545	1.32448e-06
Ate1	6.46048e-11	0.300528	0.551	0.366	1.64296e-06
Tyro3	6.66035e-11	-0.25461	0.159	0.316	1.69379e-06
Cep170	7.76243e-11	0.315395	0.614	0.455	1.97406e-06
Gabbr1	7.88769e-11	-0.290892	0.719	0.865	2.00592e-06
Zfp804b	8.39004e-11	0.706706	0.489	0.285	2.13367e-06
Astn2	9.85394e-11	0.431152	0.712	0.532	2.50596e-06
Hras	9.94156e-11	-0.303445	0.272	0.44	2.52824e-06
Pabpn1	1.00116e-10	0.325813	0.843	0.74	2.54606e-06
Rab40b	1.03009e-10	-0.328973	0.292	0.476	2.61962e-06
Strn3	1.03083e-10	0.293028	0.9	0.86	2.6215e-06
Baz2b	1.18201e-10	0.341995	0.805	0.692	3.00597e-06
D3Ertd751e	1.18615e-10	0.291808	0.439	0.254	3.01651e-06
Cntn6	1.27257e-10	0.417265	0.449	0.254	3.23628e-06
Ctnna2	1.27514e-10	0.309569	0.996	0.997	3.24282e-06
Ldhb	1.28299e-10	-0.320804	0.558	0.728	3.26276e-06
Chchd10	1.47877e-10	-0.322496	0.534	0.712	3.76065e-06
Setbp1	1.50607e-10	0.332341	0.886	0.809	3.83008e-06
Klf12	1.58215e-10	0.343487	0.871	0.822	4.02357e-06
Rpl19	1.58832e-10	-0.32556	0.532	0.71	4.03926e-06
Agbl4	1.62118e-10	0.29904	0.954	0.936	4.12281e-06
A230006K03Rik	1.6466e-10	0.346639	0.94	0.868	4.18747e-06
Vgf	1.69359e-10	-0.335027	0.213	0.379	4.30697e-06
Kctd16	1.74524e-10	-0.477669	0.84	0.896	4.43832e-06
Tll1	1.83761e-10	-0.325901	0.196	0.359	4.67322e-06
Vamp2	2.05466e-10	-0.314219	0.363	0.532	5.22521e-06
Itpr1	2.09759e-10	-0.430529	0.57	0.702	5.33438e-06
Nrg3	2.12335e-10	0.430534	0.98	0.941	5.39989e-06
Kif21a	2.35044e-10	0.291895	0.929	0.883	5.97741e-06
Nfix	2.3884e-10	-0.271575	0.171	0.331	6.07394e-06
Trim9	2.44888e-10	-0.337324	0.662	0.796	6.22774e-06
Zmat1	2.47048e-10	0.3077	0.386	0.216	6.28269e-06
Mirg	2.52295e-10	0.288361	0.703	0.517	6.41611e-06
Ptma	2.57596e-10	-0.381849	0.369	0.534	6.55092e-06
Wasf1	2.62211e-10	-0.305214	0.446	0.621	6.66829e-06
Prkdc	3.12046e-10	0.300955	0.492	0.316	7.93565e-06
Gm30382	3.35051e-10	0.421503	0.439	0.265	8.52069e-06
Hip1r	3.46884e-10	-0.256511	0.189	0.346	8.82161e-06
Jund	3.47588e-10	-0.289398	0.229	0.389	8.83952e-06
Rpl29	3.49933e-10	-0.321756	0.355	0.519	8.89915e-06
Plxnc1	3.69198e-10	0.303379	0.413	0.239	9.38908e-06
Olfm3	3.83142e-10	-0.452495	0.77	0.835	9.74368e-06
Rasgef1a	3.8625e-10	-0.303928	0.586	0.707	9.82273e-06
Mast2	3.93995e-10	0.346166	0.65	0.509	1.00197e-05
Ece2	3.97697e-10	0.268331	0.436	0.257	1.01138e-05
Ptprm	4.27596e-10	-0.426849	0.65	0.794	1.08742e-05
Spred1	4.27711e-10	-0.295776	0.498	0.659	1.08771e-05
Ptbp2	4.37999e-10	0.307298	0.757	0.626	1.11387e-05
Cdh11	4.43329e-10	-0.372298	0.518	0.7	1.12743e-05
P2ry14	4.44144e-10	0.364881	0.608	0.443	1.1295e-05
Mxi1	4.53703e-10	-0.25879	0.278	0.45	1.15381e-05
4933424G05Rik	4.71999e-10	-0.351399	0.274	0.438	1.20034e-05
Sv2c	4.7948e-10	-0.388099	0.399	0.575	1.21937e-05
Acer3	5.53875e-10	0.299673	0.473	0.293	1.40856e-05
Nrcam	5.65411e-10	-0.270839	0.886	0.959	1.4379e-05
Acsl3	6.31475e-10	-0.31908	0.369	0.542	1.6059e-05
Plk2	6.5681e-10	-0.279161	0.21	0.369	1.67033e-05
N4bp2	7.58747e-10	0.29232	0.354	0.191	1.92957e-05
Coq10b	7.64435e-10	-0.30666	0.186	0.338	1.94404e-05
Med12l	7.85282e-10	0.333037	0.679	0.545	1.99705e-05
Ppp1r16b	8.47275e-10	-0.290107	0.275	0.44	2.15471e-05
Lnx1	8.72509e-10	0.327784	0.407	0.242	2.21888e-05
Vat1l	9.00156e-10	0.350109	0.512	0.333	2.28919e-05
Unc5d	9.43814e-10	0.632675	0.779	0.712	2.40021e-05
Grin3a	9.51514e-10	0.349217	0.559	0.366	2.4198e-05
Nxpe4	9.62074e-10	0.343195	0.399	0.237	2.44665e-05
Aatf	1.00551e-09	0.251525	0.455	0.277	2.55712e-05
Mir9-3hg	1.02184e-09	-0.25197	0.338	0.532	2.59863e-05
Abl2	1.10004e-09	-0.37628	0.62	0.74	2.79752e-05
Gm45341	1.10688e-09	0.294855	0.288	0.13	2.81492e-05
Ubxn4	1.11791e-09	0.329332	0.625	0.494	2.84296e-05
Tmem158	1.13945e-09	-0.311622	0.466	0.613	2.89774e-05
Snca	1.17946e-09	-0.360286	0.528	0.654	2.99947e-05
Lzts1	1.21006e-09	-0.303866	0.362	0.524	3.0773e-05
Oaz1	1.31453e-09	-0.318521	0.567	0.715	3.34298e-05
5330434G04Rik	1.38045e-09	0.344066	0.817	0.761	3.51062e-05
Zfp804a	1.41433e-09	0.302182	0.709	0.565	3.59679e-05
Luc7l3	1.46374e-09	0.301378	0.917	0.858	3.72243e-05
Chd9	1.47088e-09	0.267252	0.917	0.858	3.7406e-05
Sdk1	1.7044e-09	0.63107	0.427	0.262	4.33445e-05
Ubr3	1.73406e-09	0.265838	0.863	0.761	4.40988e-05
Csmd1	2.01075e-09	0.311821	0.994	0.985	5.11353e-05
Cep164	2.1534e-09	0.280441	0.611	0.443	5.4763e-05
Ndufb4	2.17154e-09	-0.295827	0.225	0.379	5.52243e-05
Ctif	2.26027e-09	0.316998	0.565	0.407	5.74808e-05
Nexmif	2.26778e-09	0.363141	0.604	0.461	5.76719e-05
Rarb	2.3661e-09	-0.450969	0.564	0.687	6.01723e-05
Washc4	2.40988e-09	0.252266	0.435	0.267	6.12858e-05
Nagk	2.45475e-09	0.251288	0.396	0.224	6.24268e-05
Pakap	2.61794e-09	0.308369	0.712	0.562	6.65769e-05
Gm44644	2.63254e-09	0.26304	0.373	0.214	6.69481e-05
Uqcrq	2.64398e-09	-0.294318	0.373	0.537	6.72391e-05
Ndufb7	2.68778e-09	-0.281842	0.259	0.42	6.8353e-05
Fbxl17	2.70317e-09	0.296883	0.954	0.903	6.87443e-05
Copg2	2.87062e-09	0.295871	0.724	0.598	7.30028e-05
Cox8a	2.88803e-09	-0.331358	0.568	0.73	7.34456e-05
Fam189a1	2.89756e-09	-0.283782	0.623	0.781	7.36878e-05
Gm32509	2.9856e-09	0.338725	0.504	0.333	7.59269e-05
Bsn	2.99471e-09	-0.278289	0.43	0.583	7.61586e-05
Zfp532	3.00754e-09	0.321515	0.575	0.435	7.64847e-05
Ccnl2	3.03322e-09	0.291031	0.742	0.623	7.71379e-05
Podxl2	3.33242e-09	0.319308	0.54	0.382	8.47467e-05
Rpl13	3.3478e-09	-0.323607	0.637	0.748	8.51378e-05
Olfm1	3.44523e-09	-0.375755	0.375	0.524	8.76156e-05
Cdc42bpa	3.61629e-09	0.261127	0.904	0.817	9.1966e-05
Gm28376	3.79451e-09	-0.313466	0.225	0.374	9.64982e-05
Cpne8	4.54608e-09	0.296457	0.305	0.15	0.000115611
Ywhaz	4.61067e-09	-0.320123	0.612	0.733	0.000117254
Pkp4	4.68974e-09	0.296319	0.691	0.55	0.000119265
Kiz	4.78012e-09	0.254477	0.374	0.209	0.000121563
Tpm1	4.91536e-09	-0.271188	0.384	0.542	0.000125003
Ppp1r2	5.08355e-09	-0.352655	0.384	0.524	0.00012928
Arhgef2	5.1052e-09	-0.26018	0.21	0.359	0.00012983
Cox4i1	5.31785e-09	-0.336086	0.656	0.774	0.000135238
Ralgapa1	5.41484e-09	0.259776	0.91	0.883	0.000137705
Osbpl3	5.51464e-09	-0.25975	0.232	0.389	0.000140243
Rpl27a	5.59685e-09	-0.328507	0.525	0.659	0.000142334
Nsg1	5.72398e-09	-0.310866	0.579	0.71	0.000145567
Grb10	6.23353e-09	0.310401	0.765	0.646	0.000158525
Gm47283	6.42194e-09	0.381674	0.868	0.799	0.000163316
Gap43	6.45872e-09	0.298349	0.765	0.623	0.000164252
Tfrc	6.58939e-09	0.275658	0.501	0.341	0.000167575
Mttp	7.54837e-09	0.331717	0.472	0.318	0.000191963
Dync2h1	8.39599e-09	0.302044	0.706	0.578	0.000213518
Spred2	8.87078e-09	-0.342898	0.469	0.59	0.000225593
Fstl1	8.95108e-09	-0.290886	0.211	0.354	0.000227635
Man1a2	1.06331e-08	-0.27	0.625	0.771	0.000270411
Sh3bgrl3	1.07923e-08	-0.283684	0.23	0.374	0.00027446
Asic2	1.08575e-08	0.388401	0.958	0.944	0.000276116
Acyp2	1.11537e-08	0.297053	0.592	0.438	0.000283651
Gm16105	1.14881e-08	-0.285601	0.262	0.399	0.000292153
Nsg2	1.15011e-08	-0.269287	0.797	0.878	0.000292484
Tacc1	1.19845e-08	-0.276383	0.583	0.728	0.000304777
Gm10754	1.21444e-08	-0.863455	0.357	0.466	0.000308843
Ube2e2	1.23265e-08	0.290208	0.902	0.824	0.000313475
Supt3	1.25522e-08	0.306978	0.529	0.372	0.000319215
Rpl21	1.26292e-08	-0.326858	0.482	0.631	0.000321173
Prkd1	1.32139e-08	-0.564775	0.349	0.473	0.000336044
Nin	1.36139e-08	-0.286948	0.465	0.608	0.000346215
Ppp1cc	1.39058e-08	-0.274857	0.315	0.473	0.000353637
Rreb1	1.43303e-08	0.388092	0.3	0.16	0.000364434
Wdfy3	1.43454e-08	0.27663	0.807	0.725	0.000364817
Hivep3	1.45402e-08	0.286327	0.772	0.654	0.000369771
Trip12	1.54096e-08	0.269558	0.836	0.728	0.000391881
Tle4	1.54629e-08	0.350566	0.639	0.478	0.000393237
Spon1	1.55851e-08	-0.43714	0.312	0.466	0.000396345
Pcdh11x	1.57774e-08	0.533204	0.601	0.476	0.000401234
Lnpk	1.68871e-08	0.280676	0.666	0.542	0.000429457
Caln1	1.72004e-08	-0.322728	0.8	0.865	0.000437423
Rcan2	1.8468e-08	-0.312802	0.64	0.771	0.000469659
Tcf12	1.87932e-08	0.273768	0.794	0.674	0.00047793
U2surp	1.88672e-08	0.275667	0.857	0.774	0.000479811
Kcnk2	2.12393e-08	-0.602403	0.517	0.603	0.000540136
Smyd3	2.15022e-08	0.261993	0.897	0.87	0.000546823
Ammecr1	2.17798e-08	0.336922	0.409	0.26	0.000553882
Cacna1c	2.24721e-08	-0.320167	0.971	0.967	0.000571487
Cox5b	2.29592e-08	-0.30218	0.46	0.616	0.000583876
Stx1b	2.32975e-08	-0.252606	0.34	0.486	0.000592478
St3gal5	2.40238e-08	-0.25293	0.346	0.496	0.000610949
Gbf1	2.48327e-08	0.257209	0.716	0.623	0.000631521
Sox1ot	2.64504e-08	-0.290395	0.413	0.567	0.00067266
Sorl1	2.64843e-08	-0.308425	0.531	0.662	0.000673522
Gucy1a2	2.73777e-08	0.301802	0.811	0.72	0.000696243
Dnm3	2.91435e-08	-0.253806	0.973	0.982	0.000741148
Tmem117	2.96732e-08	0.32198	0.666	0.545	0.000754619
Rgs8	2.97272e-08	-0.269862	0.251	0.389	0.000755992
Ccdc148	2.98367e-08	0.315727	0.611	0.468	0.000758778
Xpo1	3.01227e-08	0.27503	0.567	0.41	0.000766051
Cox16	3.08914e-08	0.28653	0.83	0.763	0.0007856
Ncoa2	3.16067e-08	0.262843	0.824	0.718	0.00080379
P4ha1	3.3786e-08	-0.283206	0.371	0.511	0.000859211
Usp29	3.4408e-08	0.339398	0.88	0.863	0.000875029
Rab6b	3.49967e-08	-0.305615	0.546	0.667	0.000890002
Slc6a6	3.57976e-08	-0.250071	0.581	0.728	0.000910368
Fkbp2	3.63178e-08	-0.270484	0.354	0.501	0.000923599
Cdk12	3.78056e-08	0.267693	0.77	0.664	0.000961434
Crim1	4.07929e-08	0.353045	0.388	0.242	0.0010374
Kazn	4.34502e-08	-0.266943	0.265	0.407	0.00110498
Lpin2	4.79678e-08	0.268081	0.554	0.405	0.00121987
Atp5g1	4.81687e-08	-0.301199	0.458	0.601	0.00122498
Lrrtm4	4.82835e-08	0.40464	0.979	0.954	0.0012279
5330417C22Rik	4.84212e-08	-0.328482	0.526	0.649	0.0012314
Dst	5.34497e-08	0.26616	0.945	0.908	0.00135928
Tspan5	5.36929e-08	-0.260174	0.712	0.83	0.00136546
Kcnab1	5.40818e-08	-0.37674	0.803	0.883	0.00137535
Bend6	5.53985e-08	0.295417	0.515	0.361	0.00140884
Nt5c2	5.55819e-08	0.253631	0.733	0.606	0.0014135
Rps2	5.69865e-08	-0.266143	0.483	0.621	0.00144922
Zkscan16	5.79266e-08	0.267217	0.498	0.344	0.00147313
Hsp90ab1	5.91e-08	-0.279663	0.893	0.911	0.00150297
Relch	5.92561e-08	0.26138	0.686	0.57	0.00150694
Srgap2	5.93844e-08	0.27371	0.744	0.631	0.0015102
Phf14	6.05778e-08	0.253647	0.811	0.712	0.00154055
Map2k1	6.06369e-08	-0.312028	0.48	0.611	0.00154206
Zeb1	6.19998e-08	0.259953	0.843	0.738	0.00157672
Gm48091	6.35835e-08	-0.286413	0.42	0.555	0.00161699
Ewsr1	6.50214e-08	0.25295	0.827	0.743	0.00165356
Tro	6.5254e-08	0.28598	0.735	0.623	0.00165947
Nkain3	6.60204e-08	0.422446	0.672	0.545	0.00167897
Gab2	6.69965e-08	0.298438	0.417	0.267	0.00170379
Raph1	6.88191e-08	0.259909	0.599	0.453	0.00175014
Mfn1	7.05844e-08	0.268977	0.482	0.333	0.00179503
Vps13a	7.11947e-08	0.268151	0.724	0.598	0.00181055
Opcml	7.33085e-08	-0.276256	0.974	0.987	0.00186431
Mllt3	7.68077e-08	0.252889	0.851	0.753	0.0019533
Slc24a4	7.9237e-08	-0.265465	0.262	0.405	0.00201508
Dscaml1	8.05382e-08	0.313558	0.659	0.529	0.00204817
Cog5	8.10215e-08	0.257094	0.713	0.595	0.00206046
Ppp2r3a	8.11197e-08	0.278079	0.7	0.557	0.00206295
Cmip	8.58985e-08	0.262883	0.762	0.651	0.00218449
Syt5	8.71243e-08	-0.292691	0.441	0.573	0.00221566
Pcsk1n	8.87669e-08	0.358191	0.945	0.888	0.00225743
Sidt1	8.99129e-08	0.267272	0.384	0.234	0.00228657
Grik2	9.54737e-08	0.34838	0.989	0.99	0.00242799
Garem1	9.62038e-08	-0.279021	0.419	0.562	0.00244656
Ndufa13	9.72588e-08	-0.262553	0.439	0.603	0.00247339
Runx2	1.0308e-07	-0.294737	0.368	0.524	0.00262143
Icam5	1.08622e-07	-0.25266	0.261	0.399	0.00276237
Sptb	1.1121e-07	-0.250891	0.342	0.481	0.00282819
Atp6v1d	1.19429e-07	-0.251554	0.475	0.621	0.0030372
Csgalnact1	1.27993e-07	-0.332052	0.415	0.565	0.00325499
Efr3b	1.28091e-07	-0.267545	0.458	0.603	0.00325747
Zdhhc2	1.29589e-07	0.289099	0.504	0.366	0.00329558
Fchsd2	1.32795e-07	0.257742	0.809	0.712	0.00337711
Cdh12	1.33648e-07	0.493272	0.395	0.26	0.00339881
Tenm1	1.3603e-07	0.304954	0.926	0.913	0.00345937
Spats2l	1.43213e-07	0.283658	0.416	0.267	0.00364206
Lmo4	1.45595e-07	-0.367516	0.389	0.524	0.00370262
Helz	1.48017e-07	0.270178	0.685	0.567	0.00376423
B230217J21Rik	1.48455e-07	0.275383	0.291	0.158	0.00377536
Mir124a-1hg	1.57536e-07	-0.256943	0.662	0.761	0.0040063
Pdcd7	1.6424e-07	0.275872	0.44	0.288	0.00417678
Dzip3	1.68216e-07	0.252258	0.827	0.707	0.00427791
Cap2	1.69167e-07	-0.251316	0.633	0.753	0.00430209
Usp40	1.84593e-07	0.26693	0.527	0.387	0.00469437
Sgce	1.95132e-07	0.288506	0.508	0.366	0.0049624
Ext1	2.37154e-07	-0.267282	0.795	0.858	0.00603105
Rpl32	2.41382e-07	-0.292829	0.369	0.501	0.00613859
Ndufb10	2.42767e-07	-0.259446	0.34	0.473	0.00617381
Fau	2.46473e-07	-0.292981	0.52	0.654	0.00626804
Rpsa	2.48002e-07	-0.284297	0.471	0.611	0.00630694
Mrpl41	2.62012e-07	-0.268718	0.42	0.555	0.00666323
Prkg1	2.74327e-07	0.380521	0.726	0.578	0.0069764
Gm26917	2.76201e-07	0.272611	0.608	0.481	0.00702406
Adamtsl1	2.76785e-07	-0.271316	0.238	0.387	0.00703891
Rhobtb2	2.91598e-07	-0.267552	0.27	0.402	0.00741562
Gtdc1	3.02663e-07	0.295229	0.585	0.466	0.00769702
Ndufv2	3.0388e-07	-0.254622	0.445	0.583	0.00772797
Pid1	3.04001e-07	0.258841	0.678	0.524	0.00773104
Cdk8	3.14767e-07	-0.270647	0.83	0.873	0.00800485
Lmo7	3.21331e-07	-0.281666	0.42	0.565	0.00817176
Cdh10	3.33491e-07	0.319347	0.77	0.684	0.00848101
Nbeal1	3.62775e-07	0.290813	0.62	0.509	0.00922572
Rpl35a	3.97336e-07	-0.252963	0.324	0.455	0.0101047
Gpx4	4.11823e-07	-0.266689	0.36	0.509	0.0104731
Rpl8	4.2192e-07	-0.330505	0.449	0.562	0.0107299
Tpt1	4.6115e-07	-0.310366	0.433	0.555	0.0117275
Hecw1	5.00347e-07	0.262365	0.782	0.697	0.0127243
Dpp6	5.09504e-07	-0.257058	0.989	0.997	0.0129572
Sestd1	5.12963e-07	0.25385	0.52	0.379	0.0130452
Tafa1	5.71359e-07	0.33948	0.262	0.125	0.0145302
Pced1b	5.83075e-07	0.279933	0.434	0.298	0.0148282
Spata7	5.9093e-07	0.253764	0.586	0.461	0.015028
Ndufa11	6.38608e-07	-0.27353	0.338	0.463	0.0162404
Slit3	6.51528e-07	-0.395484	0.572	0.682	0.016569
Strn	6.52446e-07	-0.292795	0.441	0.565	0.0165924
Plcl1	7.36525e-07	-0.279966	0.624	0.753	0.0187306
Pde9a	7.38727e-07	-0.295182	0.229	0.346	0.0187866
Tbcd	7.4859e-07	0.269788	0.452	0.331	0.0190374
Ubb	7.85164e-07	-0.370828	0.906	0.947	0.0199675
Rps8	8.13972e-07	-0.288453	0.603	0.72	0.0207001
Cox7a2	8.29106e-07	-0.268939	0.4	0.542	0.021085
Vps13d	9.15776e-07	0.254613	0.612	0.506	0.0232891
Sobp	9.24157e-07	0.282864	0.726	0.651	0.0235022
Spink10	9.25055e-07	0.270686	0.382	0.252	0.0235251
Neto2	9.69084e-07	-0.315104	0.474	0.583	0.0246448
Ptprz1	1.0302e-06	0.324548	0.586	0.461	0.0261991
Uty	1.06754e-06	0.272288	0.633	0.534	0.0271486
Ppia	1.1248e-06	-0.31012	0.834	0.893	0.0286049
Clstn3	1.12978e-06	-0.262886	0.512	0.621	0.0287314
Gas5	1.14219e-06	0.255055	0.706	0.578	0.0290471
Sh3kbp1	1.17749e-06	0.286137	0.578	0.461	0.0299446
Snrnp48	1.20486e-06	0.254503	0.579	0.463	0.0306407
Lrtm1	1.23551e-06	-0.27428	0.314	0.438	0.0314203
Jazf1	1.23599e-06	0.2769	0.729	0.667	0.0314325
Cpne6	1.25647e-06	-0.257577	0.358	0.491	0.0319533
Tef	1.25966e-06	-0.265037	0.41	0.532	0.0320344
Nfib	1.33503e-06	-0.472346	0.296	0.427	0.0339511
Fam172a	1.34643e-06	0.258872	0.82	0.768	0.0342411
Bbx	1.3652e-06	0.269323	0.555	0.443	0.0347184
Fam120c	1.41913e-06	0.281199	0.573	0.458	0.0360898
Col6a1	1.45048e-06	-0.28768	0.16	0.267	0.0368872
Kcnq5	1.50568e-06	-0.345034	0.896	0.944	0.0382909
Clstn1	1.58549e-06	-0.271725	0.679	0.763	0.0403205
Fndc3a	1.68607e-06	0.256787	0.689	0.585	0.0428785
Naaladl2	1.74823e-06	0.272413	0.631	0.499	0.0444591
Slc38a2	2.05444e-06	-0.280683	0.526	0.636	0.0522465
Lrch1	2.06294e-06	0.262479	0.624	0.529	0.0524626
Rpl37	2.07661e-06	-0.257153	0.377	0.504	0.0528102
Immp2l	2.40623e-06	0.253707	0.777	0.677	0.0611929
Wfs1	2.5748e-06	-0.277392	0.204	0.316	0.0654796
Kcnip1	2.65056e-06	0.296206	0.559	0.425	0.0674064
Gm10848	2.85949e-06	-0.34228	0.236	0.336	0.0727197
Scn2b	3.52377e-06	-0.257844	0.329	0.44	0.0896131
Trps1	3.64125e-06	-0.310503	0.606	0.728	0.0926006
Phip	4.02566e-06	0.254809	0.723	0.621	0.102376
Nedd4l	4.06161e-06	-0.276678	0.847	0.87	0.103291
B3galt1	4.19656e-06	-0.265857	0.933	0.987	0.106723
Inpp4b	4.644e-06	-0.465382	0.739	0.807	0.118102
Slc44a5	4.75122e-06	-0.386189	0.528	0.644	0.120828
Syndig1	5.48772e-06	-0.325922	0.415	0.532	0.139558
Aplp1	6.21739e-06	-0.278841	0.702	0.766	0.158115
Msi2	6.75463e-06	0.252839	0.629	0.532	0.171777
Sorcs3	6.76948e-06	0.263355	0.612	0.463	0.172155
Gapdh	7.41152e-06	-0.27918	0.854	0.885	0.188482
Cacnb2	7.62415e-06	-0.399118	0.958	0.952	0.19389
Trpc4	7.65513e-06	0.263717	0.386	0.257	0.194678
Plcb4	8.51981e-06	0.262172	0.608	0.501	0.216667
Slc24a5	9.39687e-06	0.258563	0.669	0.578	0.238972
Gm38505	1.05888e-05	-0.270905	0.607	0.725	0.269284
Rps6ka5	1.06789e-05	-0.271315	0.462	0.578	0.271575
A830018L16Rik	1.1291e-05	0.307887	0.732	0.667	0.287141
Cnr1	1.46305e-05	-0.340269	0.212	0.308	0.372069
Kcnh5	1.51584e-05	-0.44249	0.441	0.522	0.385493
Cntnap5b	1.61928e-05	0.644221	0.489	0.402	0.4118
Gm13269	1.82406e-05	-0.287954	0.327	0.435	0.463876
Syt6	2.30374e-05	-0.282335	0.305	0.415	0.585864
March11	2.34995e-05	-0.257692	0.268	0.377	0.597615
Itm2c	2.44272e-05	-0.27557	0.752	0.817	0.621209
Mapk4	2.54938e-05	-0.274467	0.304	0.412	0.648332
Sema6d	2.73715e-05	-0.283909	0.777	0.863	0.696084
Scd2	3.50932e-05	-0.257228	0.449	0.56	0.892455
Fth1	3.55567e-05	-0.308081	0.772	0.837	0.904243
Stmn1	3.59995e-05	-0.271009	0.494	0.595	0.915504
Vwc2	3.75022e-05	0.255243	0.333	0.219	0.953718
Ntng1	3.81331e-05	-0.29198	0.66	0.771	0.969763
Gabrg3	3.93646e-05	-0.280447	0.967	0.964	1
Gabra3	4.19394e-05	0.267595	0.613	0.527	1
Slc35f3	4.37341e-05	-0.267923	0.599	0.677	1
Cdh9	5.09435e-05	-0.35571	0.526	0.606	1
Atp5h	6.38335e-05	-0.269604	0.494	0.578	1
Synpr	6.83455e-05	-0.28321	0.373	0.494	1
Lin28b	6.92325e-05	0.268652	0.527	0.427	1
Rpl11	6.93622e-05	-0.260561	0.475	0.562	1
Gm15398	7.38413e-05	-0.322389	0.624	0.705	1
Fstl4	7.80163e-05	0.365312	0.323	0.221	1
Casz1	7.80471e-05	-0.290826	0.263	0.356	1
Ntrk2	8.8139e-05	-0.290352	0.902	0.896	1
Chd4	9.58571e-05	-0.2522	0.593	0.659	1
Chl1	0.00013136	0.2968	0.66	0.593	1
Gm1604a	0.000159043	-0.275507	0.567	0.621	1
Bach2	0.000178699	-0.274971	0.575	0.646	1
Scg2	0.000193649	-0.266384	0.531	0.628	1
Selenom	0.000201399	-0.256807	0.415	0.517	1
Robo2	0.000209558	0.304552	0.821	0.812	1
March3	0.0002128	-0.250378	0.487	0.601	1
Aff2	0.000239794	0.300027	0.562	0.478	1
Pacrg	0.000286594	0.2589	0.475	0.382	1
Vwc2l	0.000348761	-0.482853	0.548	0.57	1
Rbms3	0.000469267	-0.318602	0.804	0.837	1
Gm28905	0.000505555	-0.504734	0.652	0.682	1
Egfem1	0.000530475	0.342937	0.546	0.443	1
Nnat	0.000539297	0.309475	0.494	0.412	1
Ddx5	0.000653911	0.269259	0.972	0.957	1
Nrg1	0.00119372	-0.255263	0.892	0.908	1
Cadps2	0.00129275	0.48196	0.461	0.384	1
Chsy3	0.0013022	0.264329	0.7	0.631	1
Pcdh9	0.00186403	0.264598	0.933	0.865	1
Sphkap	0.00242627	-0.289834	0.54	0.608	1
Mef2c	0.00699421	-0.287655	0.649	0.669	1
Ano3	0.0070632	-0.259154	0.6	0.623	1
Htr1f	0.0214378	-0.283166	0.472	0.522	1
Prr16	0.0254967	0.407293	0.46	0.427	1
Dpp10	0.147679	0.274163	0.903	0.949	1
Sorcs1	0.273357	-0.342168	0.737	0.692	1
Dlgap1	0.622202	-0.28202	0.953	0.913	1

## Sheet: thiamine_cluster5R61vvsNTv
Column1	p_val	avg_log2FC	pct.1	pct.2	p_val_adj
Cmss1	1.444e-53	-0.760195	1	1	3.67223e-49
Mt1	1.55339e-39	-0.976635	0.788	0.906	3.95042e-35
Pcp4	3.90628e-36	-0.835017	0.741	0.864	9.93406e-32
Id3	6.62037e-34	-1.03513	0.347	0.651	1.68363e-29
Penk	2.93308e-29	-0.71916	0.193	0.487	7.45912e-25
Adgrl3	6.01401e-27	0.552195	0.998	0.992	1.52942e-22
Aldoc	1.52941e-26	-0.813843	0.602	0.791	3.88945e-22
Mt3	1.73646e-25	-0.663478	0.766	0.867	4.41598e-21
Ckb	2.63065e-25	-0.566697	0.989	0.994	6.69e-21
Nrgn	3.57538e-24	-0.631287	0.7	0.869	9.09254e-20
Clu	6.00792e-24	-0.713852	0.866	0.914	1.52787e-19
Fgf14	6.35856e-24	0.515653	0.997	0.979	1.61705e-19
Glul	1.39512e-23	-0.650013	0.64	0.803	3.54792e-19
Gstm5	1.99484e-22	-0.699896	0.553	0.77	5.07308e-18
Malat1	6.5911e-22	-0.252585	1	1	1.67618e-17
Prdx6	1.20498e-21	-0.584873	0.805	0.865	3.06438e-17
Apoe	4.10761e-20	-0.556036	0.976	0.977	1.04461e-15
Lrrc4c	4.44563e-20	0.485231	0.998	0.992	1.13057e-15
Mgat4c	1.29023e-19	0.681571	0.912	0.786	3.28118e-15
Trpm3	2.31209e-19	0.692219	0.906	0.854	5.87986e-15
Akap6	3.3054e-19	0.448698	0.973	0.889	8.40597e-15
Cadm2	3.11155e-18	0.30425	1	0.998	7.91299e-14
Rims2	7.72808e-18	0.465368	0.978	0.879	1.96533e-13
Rsrp1	4.05936e-17	-0.375733	0.972	0.979	1.03234e-12
Hdac9	4.15188e-17	0.612256	0.808	0.665	1.05586e-12
Agbl4	4.89895e-17	0.547003	0.726	0.52	1.24585e-12
Npas3	7.28681e-17	0.525181	0.954	0.928	1.85311e-12
Pbx1	7.50117e-17	0.410166	0.997	0.992	1.90762e-12
Camk1d	7.73012e-17	-0.403717	0.951	0.971	1.96585e-12
Dbp	9.70755e-17	-0.456565	0.302	0.52	2.46873e-12
Adgrb3	1.36974e-16	0.417659	0.998	0.99	3.48339e-12
Ctnnd2	2.65309e-16	0.396979	1	1	6.74707e-12
Htra1	3.49975e-16	-0.608074	0.667	0.758	8.90021e-12
Slc25a21	2.04516e-15	0.538424	0.341	0.144	5.20105e-11
Tsc22d4	2.28927e-15	-0.462882	0.536	0.739	5.82183e-11
Hpca	5.55084e-15	-0.453385	0.184	0.384	1.41163e-10
Cst3	1.14718e-14	-0.476169	0.995	0.998	2.9174e-10
Kcnk1	1.32159e-14	-0.488785	0.428	0.634	3.36093e-10
Id4	1.49987e-14	-0.515537	0.591	0.731	3.81432e-10
Hif3a	2.20195e-14	-0.281295	0.09	0.257	5.59978e-10
Id2	2.59841e-14	-0.551665	0.385	0.571	6.60803e-10
Fjx1	5.15452e-14	-0.586313	0.508	0.669	1.31085e-09
Arpp19	7.44137e-14	-0.405646	0.264	0.476	1.89242e-09
Ncam2	8.09124e-14	0.506024	0.978	0.938	2.05768e-09
Plce1	1.72294e-13	0.504753	0.495	0.296	4.38161e-09
Mt2	1.85533e-13	-0.50869	0.366	0.552	4.71829e-09
Spon1	1.86387e-13	0.407345	0.478	0.273	4.74002e-09
Nlgn1	2.13195e-13	0.343656	0.995	0.994	5.42176e-09
Ogt	3.014e-13	0.355766	0.961	0.926	7.66492e-09
Nrxn1	3.02589e-13	0.326508	1	1	7.69514e-09
Nfia	3.13045e-13	0.374088	0.969	0.955	7.96105e-09
Grin2b	7.33316e-13	0.39397	0.94	0.858	1.8649e-08
Btbd17	9.01656e-13	-0.457447	0.404	0.595	2.293e-08
Camk2n1	1.08279e-12	-0.449201	0.388	0.591	2.75364e-08
Ppp1r1b	1.16376e-12	-0.411179	0.201	0.386	2.95955e-08
Ttyh1	1.24026e-12	-0.404629	0.822	0.879	3.15411e-08
Kcnip4	1.57479e-12	0.526317	0.951	0.875	4.00484e-08
Mical2	2.12168e-12	-0.402147	0.398	0.6	5.39564e-08
Bcan	2.4138e-12	-0.45998	0.772	0.817	6.13853e-08
Rgs6	4.44078e-12	0.493816	0.794	0.68	1.12934e-07
Cspg5	4.96708e-12	-0.371824	0.862	0.891	1.26318e-07
Phgdh	5.15717e-12	-0.398491	0.352	0.546	1.31152e-07
Lrmda	6.24071e-12	0.545486	0.314	0.146	1.58707e-07
Rgcc	6.80383e-12	-0.396368	0.239	0.419	1.73028e-07
Paqr8	7.03374e-12	-0.422601	0.473	0.641	1.78875e-07
Mfge8	9.4277e-12	-0.466858	0.503	0.659	2.39756e-07
Camk2d	1.21459e-11	0.436065	0.604	0.448	3.08882e-07
Foxp1	1.54151e-11	0.346072	0.965	0.901	3.92021e-07
Meg3	1.70604e-11	0.550535	0.973	0.924	4.33864e-07
Scd2	1.71609e-11	-0.363996	0.849	0.895	4.36419e-07
Slc1a2	1.80031e-11	-0.374453	0.931	0.945	4.57836e-07
Acsl3	1.87358e-11	-0.390352	0.821	0.865	4.76469e-07
Scrg1	1.93436e-11	-0.416239	0.302	0.474	4.91928e-07
Mat2a	2.04322e-11	-0.379692	0.575	0.731	5.1961e-07
Sgcz	2.16186e-11	0.533999	0.918	0.827	5.49781e-07
Nrcam	2.16358e-11	0.322362	0.97	0.961	5.5022e-07
Ctxn1	2.79189e-11	-0.304231	0.11	0.261	7.10005e-07
Vegfa	2.9878e-11	-0.40515	0.428	0.596	7.59827e-07
Lrfn5	4.41643e-11	0.356289	0.805	0.647	1.12314e-06
Negr1	4.87361e-11	0.299187	0.997	0.998	1.23941e-06
Rgs7	5.18137e-11	0.505172	0.942	0.903	1.31767e-06
Kcnd2	6.09412e-11	0.639746	0.956	0.889	1.5498e-06
Dlg2	6.76896e-11	0.416684	0.984	0.947	1.72141e-06
Pde4b	1.17956e-10	0.339684	0.97	0.92	2.99975e-06
Ptma	1.25622e-10	-0.35748	0.415	0.608	3.1947e-06
Snhg14	1.34776e-10	0.318447	0.876	0.717	3.42749e-06
Gm42418	1.35826e-10	-0.290674	1	1	3.45419e-06
Nr3c2	1.60492e-10	0.385696	0.887	0.801	4.08148e-06
Gm12239	2.8632e-10	0.487791	0.767	0.674	7.28139e-06
Son	3.23139e-10	0.28804	1	0.998	8.21774e-06
Sema6d	3.39088e-10	0.366921	0.909	0.813	8.62335e-06
Ptch1	3.55619e-10	0.435951	0.626	0.468	9.04374e-06
Lxn	3.5697e-10	-0.326805	0.214	0.374	9.07811e-06
Calm1	3.65042e-10	-0.418007	0.923	0.959	9.28337e-06
Slc9a3r1	3.92479e-10	-0.297162	0.178	0.331	9.98113e-06
Slc43a2	4.06959e-10	0.321972	0.294	0.146	1.03494e-05
Erbb4	5.4566e-10	0.289144	0.805	0.661	1.38767e-05
Cdk8	6.24285e-10	-0.277033	0.892	0.93	1.58762e-05
Frmd4a	8.40622e-10	0.481651	0.991	0.984	2.13779e-05
Bicd1	8.48419e-10	0.318978	0.758	0.632	2.15761e-05
Sdc4	8.62238e-10	-0.324865	0.253	0.419	2.19276e-05
Slc7a2	1.16646e-09	-0.349975	0.283	0.444	2.96642e-05
Slc4a4	1.305e-09	0.369426	0.983	0.969	3.31876e-05
Nnat	1.41819e-09	0.811808	0.665	0.546	3.6066e-05
Dgkb	1.49311e-09	0.277348	0.998	0.994	3.79713e-05
Fabp5	1.70693e-09	-0.3954	0.376	0.532	4.34089e-05
Neat1	1.71528e-09	-0.397275	0.264	0.429	4.36213e-05
Tmsb4x	1.84502e-09	-0.506832	0.577	0.706	4.69208e-05
Gstm1	2.09456e-09	-0.435402	0.458	0.608	5.32667e-05
Srgap1	2.10996e-09	0.43061	0.597	0.462	5.36583e-05
Calm2	2.15153e-09	-0.392899	0.907	0.953	5.47156e-05
Nrxn3	2.19148e-09	0.278399	0.975	0.926	5.57316e-05
Farp1	2.50998e-09	-0.322318	0.799	0.867	6.38313e-05
Tra2a	2.86451e-09	0.305143	0.934	0.854	7.28474e-05
Ralyl	2.97197e-09	0.377176	0.714	0.546	7.55802e-05
Asap1	3.33047e-09	0.311639	0.755	0.637	8.46972e-05
Gng5	3.34985e-09	-0.274811	0.16	0.304	8.51902e-05
Robo1	3.5994e-09	0.409935	0.936	0.879	9.15363e-05
Exoc4	4.30742e-09	0.306109	0.945	0.897	0.000109542
Qk	4.41006e-09	-0.270648	0.997	0.996	0.000112152
Ptms	4.89074e-09	-0.339512	0.354	0.515	0.000124376
Rpl26	5.00777e-09	-0.373042	0.31	0.476	0.000127353
Igfbp5	5.04191e-09	-0.400755	0.192	0.337	0.000128221
Dpyd	5.5653e-09	0.444546	0.393	0.248	0.000141531
Dlgap1	7.02929e-09	0.281051	0.984	0.969	0.000178762
Kcnn2	7.08569e-09	-0.350482	0.502	0.665	0.000180196
Hexb	7.17906e-09	-0.287419	0.292	0.45	0.000182571
Lmo4	7.67503e-09	-0.291844	0.278	0.439	0.000195184
Nudt3	8.75637e-09	-0.29516	0.36	0.522	0.000222683
Pla2g7	1.48881e-08	-0.403054	0.704	0.768	0.00037862
Polr2a	1.65346e-08	0.322808	0.258	0.129	0.000420491
Tpt1	2.14047e-08	-0.370659	0.407	0.556	0.000544344
Dynll1	2.23986e-08	-0.339343	0.357	0.519	0.000569618
Rps10	2.25996e-08	-0.315892	0.393	0.556	0.000574732
Ttyh3	2.29129e-08	-0.297221	0.412	0.565	0.000582698
Vti1a	2.52707e-08	0.314334	0.791	0.71	0.000642659
Klf12	2.56285e-08	0.284333	0.86	0.799	0.000651759
Lingo2	3.18526e-08	0.341753	0.693	0.552	0.000810043
Prodh	3.26982e-08	-0.286633	0.343	0.493	0.000831549
Lhfpl3	3.35953e-08	0.276561	0.552	0.404	0.000854361
Fam155a	3.60159e-08	0.29011	0.744	0.585	0.00091592
Galnt16	4.77197e-08	0.311828	0.363	0.222	0.00121356
Sorbs1	5.76484e-08	0.332881	0.92	0.846	0.00146606
Arpp21	5.97011e-08	-0.258773	0.86	0.887	0.00151826
Nebl	6.63389e-08	0.335735	0.947	0.912	0.00168706
Rpl21	6.89259e-08	-0.313235	0.464	0.626	0.00175286
Sox9	7.15632e-08	-0.300473	0.363	0.509	0.00181992
Akt3	7.65557e-08	0.27679	0.953	0.904	0.00194689
Kcnq1ot1	7.71784e-08	0.342592	0.763	0.645	0.00196272
Atp5mpl	8.7924e-08	-0.288448	0.223	0.363	0.00223599
Trp53bp2	8.80159e-08	-0.302558	0.31	0.452	0.00223833
Gpr88	9.55688e-08	-0.299967	0.208	0.343	0.00243041
Epha6	9.81891e-08	0.30452	0.764	0.63	0.00249705
Cdr1os	1.00973e-07	0.33247	0.761	0.622	0.00256784
Cdh18	1.04258e-07	0.352561	0.621	0.481	0.0026514
Ptgds	1.07987e-07	-0.642521	0.275	0.411	0.00274622
Rian	1.14797e-07	0.307355	0.772	0.635	0.00291941
Diaph2	1.17838e-07	0.311218	0.865	0.789	0.00299674
Dock4	1.25876e-07	0.299265	0.967	0.957	0.00320115
Cdh10	1.28821e-07	0.319535	0.934	0.873	0.00327604
Eif1	1.33965e-07	-0.272778	0.893	0.924	0.00340687
Lcat	1.41258e-07	-0.285341	0.145	0.263	0.00359234
Unc80	1.42934e-07	0.265972	0.558	0.423	0.00363495
Snhg11	1.44873e-07	0.382114	0.959	0.918	0.00368426
Scmh1	1.45659e-07	0.273713	0.763	0.651	0.00370424
Prdx1	1.58089e-07	-0.35915	0.618	0.715	0.00402035
Cox8a	1.62606e-07	-0.336306	0.712	0.799	0.00413525
Gria1	1.75106e-07	0.422836	0.849	0.743	0.00445312
Gpc5	1.75185e-07	0.322319	0.892	0.877	0.00445514
Grm7	1.84585e-07	0.291342	0.899	0.809	0.00469419
Fbxo2	1.89136e-07	-0.25156	0.171	0.296	0.00480991
Gabbr2	1.96499e-07	0.390997	0.437	0.302	0.00499717
Birc6	1.96749e-07	0.253464	0.766	0.686	0.00500352
Aplp1	2.00626e-07	-0.280832	0.747	0.815	0.00510211
Atp5j	2.3165e-07	-0.352853	0.406	0.542	0.00589108
Cd63	2.58083e-07	-0.328369	0.613	0.727	0.00656331
Cox5a	2.72364e-07	-0.314229	0.514	0.634	0.00692648
Mdga2	2.82804e-07	0.25798	0.998	0.988	0.00719199
Ndufa6	3.31465e-07	-0.274643	0.25	0.388	0.00842948
Sntg1	3.57329e-07	0.264876	0.791	0.643	0.00908724
Hes5	3.6886e-07	-0.488893	0.503	0.608	0.00938047
Uqcr11	4.08937e-07	-0.268676	0.291	0.441	0.0103997
Pgp	4.22579e-07	-0.280412	0.314	0.454	0.0107466
Dbi	4.4229e-07	-0.429454	0.574	0.686	0.0112479
Rps29	4.49741e-07	-0.357258	0.409	0.54	0.0114374
Fam107a	4.79218e-07	-0.270161	0.305	0.442	0.012187
Rpl36	5.04455e-07	-0.290149	0.336	0.468	0.0128288
Rasa2	5.2599e-07	0.378158	0.637	0.561	0.0133764
Lrp4	5.57133e-07	-0.283942	0.303	0.441	0.0141685
Atp13a4	5.86782e-07	0.327362	0.506	0.39	0.0149224
Atxn1	6.13584e-07	0.274604	0.923	0.84	0.0156041
Ndufb9	6.23524e-07	-0.302332	0.366	0.507	0.0158568
Grin2c	6.64946e-07	-0.327708	0.407	0.528	0.0169103
Selenom	6.87746e-07	-0.271806	0.234	0.366	0.0174901
Reep5	7.54939e-07	-0.302898	0.502	0.639	0.0191989
Fat3	7.98394e-07	0.353109	0.914	0.84	0.0203039
Kirrel3	8.07789e-07	0.297853	0.987	0.967	0.0205429
A230006K03Rik	8.61016e-07	0.281192	0.502	0.378	0.0218965
Gpx4	8.6482e-07	-0.281871	0.34	0.48	0.0219932
Fth1	9.0577e-07	-0.435723	0.936	0.965	0.0230346
Cacna1a	9.54864e-07	0.292657	0.792	0.68	0.0242831
Rpl38	1.00211e-06	-0.281155	0.302	0.437	0.0254847
Cox6b1	1.06286e-06	-0.284388	0.421	0.558	0.0270295
Esrrg	1.14685e-06	0.382285	0.525	0.425	0.0291655
Rpsa	1.15092e-06	-0.300295	0.392	0.536	0.029269
Lrrtm4	1.23823e-06	0.319061	0.907	0.832	0.0314894
Cox7c	1.28009e-06	-0.304903	0.645	0.754	0.0325541
Rpl37	1.30603e-06	-0.306243	0.351	0.491	0.0332137
Hmgn3	1.3117e-06	-0.330635	0.436	0.558	0.0333579
Pde7b	1.34602e-06	0.27548	0.904	0.827	0.0342307
Rps16	1.37429e-06	-0.334498	0.338	0.466	0.0349496
Cxcl14	1.3976e-06	-0.333115	0.465	0.571	0.0355424
Gabrb1	1.47518e-06	0.29355	0.992	0.984	0.0375153
Sparcl1	1.51528e-06	-0.277475	0.857	0.887	0.0385352
C030005K06Rik	1.63055e-06	0.331807	0.426	0.304	0.0414664
Gm26871	1.91367e-06	0.254782	0.601	0.466	0.0486667
Cldn10	1.91689e-06	-0.295314	0.785	0.815	0.0487484
Lrba	1.9191e-06	0.251845	0.835	0.739	0.0488046
Ndufb10	1.98901e-06	-0.260523	0.357	0.493	0.0505825
Tcf7l2	2.01986e-06	0.290001	0.723	0.6	0.051367
Cdk5rap2	2.15704e-06	0.277664	0.344	0.224	0.0548558
Clmn	2.38667e-06	-0.298004	0.506	0.62	0.0606954
Fubp1	2.39398e-06	0.276338	0.803	0.729	0.0608813
Sbf2	2.42852e-06	0.267057	0.774	0.651	0.0617597
Ndufa4	2.50957e-06	-0.327337	0.689	0.797	0.063821
Afg1l	2.51277e-06	0.2585	0.366	0.248	0.0639022
Phkb	2.52308e-06	0.279482	0.67	0.554	0.0641644
Nxn	2.74057e-06	-0.312615	0.385	0.503	0.0696955
Fry	2.8088e-06	0.36003	0.887	0.828	0.0714305
Sox6	2.84227e-06	0.293641	0.825	0.752	0.0722817
Gm9925	2.85915e-06	-0.266308	0.412	0.544	0.0727111
Gm47283	3.01975e-06	0.277791	0.693	0.591	0.0767953
Baz2b	3.04073e-06	0.252424	0.896	0.832	0.0773288
Pde4d	3.23797e-06	0.342165	0.731	0.655	0.0823448
Csrp1	3.31056e-06	-0.25888	0.498	0.63	0.0841907
Mif	3.36474e-06	-0.321721	0.437	0.561	0.0855686
Slc15a2	3.41634e-06	-0.310068	0.357	0.472	0.086881
Gm26917	3.69117e-06	0.300593	0.566	0.47	0.0938701
Ahcyl2	3.87057e-06	0.26907	0.686	0.606	0.0984325
Ubc	3.88221e-06	-0.312016	0.549	0.657	0.0987284
Pid1	3.9598e-06	0.297803	0.717	0.628	0.100702
Ftx	4.00952e-06	0.288935	0.508	0.396	0.101966
Rps13	4.21942e-06	-0.302806	0.406	0.544	0.107304
5730522E02Rik	4.34607e-06	0.266212	0.653	0.532	0.110525
Ddhd1	4.94938e-06	0.280443	0.827	0.778	0.125868
Fzd2	4.98481e-06	-0.300014	0.349	0.466	0.126769
Zfp462	6.12905e-06	0.28144	0.544	0.433	0.155868
Rpl28	6.25374e-06	-0.338103	0.483	0.589	0.159039
Tenm2	6.26335e-06	0.412718	0.898	0.809	0.159283
Cox6c	6.33644e-06	-0.281523	0.384	0.519	0.161142
Cdh8	7.42363e-06	0.256932	0.613	0.487	0.18879
F3	7.45066e-06	-0.278342	0.681	0.754	0.189478
Zfpm2	7.65052e-06	0.281444	0.769	0.686	0.19456
Stxbp5l	8.43514e-06	0.266874	0.671	0.544	0.214514
Carmil1	9.52247e-06	0.289992	0.602	0.517	0.242166
Rplp1	1.07173e-05	-0.347995	0.483	0.606	0.272551
Apba2	1.07679e-05	0.282068	0.596	0.493	0.273839
Ptprt	1.09942e-05	0.286214	0.931	0.916	0.279594
Aldh1a1	1.1256e-05	-0.353286	0.181	0.283	0.28625
Chchd10	1.36484e-05	-0.289112	0.645	0.743	0.347093
Atp5h	1.37882e-05	-0.2971	0.459	0.577	0.350647
Chchd3	1.55228e-05	0.259712	0.7	0.618	0.39476
Mfap3l	1.65122e-05	-0.25583	0.36	0.481	0.419923
Sox5	1.74642e-05	0.269189	0.807	0.758	0.444132
Rmst	1.95389e-05	-0.329902	0.608	0.694	0.496893
S100a13	2.07148e-05	-0.270784	0.206	0.306	0.526798
Nrg3	2.08799e-05	0.29053	0.838	0.735	0.530997
Ddo	2.23323e-05	0.272677	0.48	0.37	0.567933
9630028H03Rik	2.25636e-05	-0.258711	0.322	0.442	0.573815
Fez1	2.27651e-05	-0.284792	0.374	0.489	0.578939
Rbfox1	2.3517e-05	0.274256	0.932	0.887	0.598061
Chchd2	2.56313e-05	-0.281481	0.571	0.674	0.651829
Galntl6	2.63869e-05	0.283022	0.813	0.704	0.671046
Rps26	2.66131e-05	-0.252987	0.225	0.335	0.676798
Sntb1	2.67109e-05	0.253833	0.296	0.191	0.679284
Rpl14	3.1827e-05	-0.261158	0.311	0.429	0.809393
Ptpn4	3.31474e-05	0.272317	0.7	0.637	0.842971
Alk	3.57043e-05	0.374252	0.297	0.203	0.907996
Sox1ot	3.65601e-05	0.271191	0.39	0.273	0.929759
Stard13	4.7509e-05	0.285971	0.557	0.464	1
Skap2	6.23213e-05	0.264883	0.335	0.238	1
Wwc1	6.57725e-05	0.272885	0.517	0.425	1
Uqcr10	8.68917e-05	-0.260315	0.259	0.361	1
Setbp1	9.23998e-05	0.276165	0.769	0.702	1
Hs6st3	0.000123134	0.273301	0.796	0.69	1
Xpo1	0.000124535	0.258556	0.484	0.396	1
Zswim5	0.000143607	0.251331	0.269	0.181	1
Mertk	0.000163222	-0.281944	0.69	0.754	1
Rpl23	0.000179044	-0.286081	0.314	0.409	1
Scg3	0.000187815	-0.253727	0.737	0.772	1
Sgcd	0.000211558	0.430985	0.428	0.343	1
Rev3l	0.000307646	0.257407	0.627	0.567	1
Rpl13	0.000333217	-0.275679	0.664	0.715	1
Rpl30	0.000339063	-0.256881	0.393	0.495	1
Brinp3	0.000393586	0.397431	0.623	0.561	1
Pde1c	0.00047321	0.267419	0.34	0.257	1
Nhsl1	0.000482495	0.261435	0.667	0.61	1
Kcnk2	0.000497858	-0.251327	0.396	0.493	1
Astn2	0.000551464	0.285859	0.533	0.481	1
Stmn1	0.00132966	-0.261286	0.305	0.4	1
H3f3a	0.00220624	-0.279268	0.619	0.686	1
Rpl27a	0.00274689	-0.275037	0.525	0.585	1
Cpq	0.0027664	0.254076	0.544	0.487	1
Pde10a	0.0116193	-0.340837	0.86	0.846	1
Plp1	0.0147203	-0.281466	0.679	0.688	1
Luzp2	0.0167395	0.273805	0.852	0.825	1
Mbp	0.112152	-0.327925	0.632	0.639	1
Dpp10	0.261111	-0.283656	0.621	0.556	1

## Sheet: thiamine_cluster6R61vvsNTv
Column1	p_val	avg_log2FC	pct.1	pct.2	p_val_adj
Malat1	1.70016e-38	-0.603127	1	1	4.32368e-34
Cmss1	1.79326e-27	-0.737336	0.989	0.997	4.56045e-23
Meg3	7.32539e-22	0.406884	1	1	1.86292e-17
Rbm28	9.413e-22	0.699665	0.834	0.542	2.39382e-17
Atad2b	1.27265e-20	0.622791	0.86	0.622	3.23649e-16
1700016P03Rik	2.21514e-15	-0.553496	0.034	0.28	5.63333e-11
Ogt	4.91536e-15	0.473577	0.962	0.923	1.25003e-10
Ube2b	8.87792e-15	0.573793	0.917	0.853	2.25775e-10
Etv5	2.13094e-14	-0.523849	0.147	0.444	5.4192e-10
Cdr1os	2.98328e-14	0.5017	0.958	0.927	7.58679e-10
Guf1	3.31756e-14	0.503466	0.747	0.514	8.43689e-10
Ank3	1.11072e-13	0.356564	1	1	2.82466e-09
U2surp	4.05759e-13	0.468798	0.906	0.801	1.03188e-08
4930402H24Rik	5.51472e-13	0.425751	0.977	0.916	1.40245e-08
Gad1	1.41779e-11	-0.686618	0.728	0.829	3.60558e-07
Magi2	2.62161e-11	0.378442	1	1	6.66701e-07
Rbm39	5.14129e-11	0.337597	0.992	0.969	1.30748e-06
Apc	6.51543e-11	0.381827	0.966	0.944	1.65694e-06
Nr4a1	9.86362e-11	-0.433313	0.094	0.311	2.50842e-06
Kcnc1	1.98605e-10	-0.62454	0.66	0.808	5.05072e-06
Prpf4b	2.56359e-10	0.375812	0.97	0.965	6.51947e-06
Luc7l2	2.65047e-10	0.332293	0.992	0.986	6.74041e-06
Tra2a	3.0737e-10	0.36629	0.966	0.92	7.81673e-06
Vstm2b	9.10347e-10	-0.461374	0.43	0.671	2.3151e-05
Fbxl17	1.46594e-09	0.351352	0.974	0.899	3.72804e-05
Scg2	1.65143e-09	-0.615615	0.728	0.811	4.19975e-05
Gls	1.67337e-09	0.351031	0.962	0.885	4.25555e-05
Rian	1.79881e-09	0.30493	0.996	1	4.57454e-05
Rbm26	2.22026e-09	0.360153	0.94	0.846	5.64635e-05
Ntrk2	4.42243e-09	-0.427822	0.925	0.972	0.000112467
Pde10a	5.01831e-09	-0.418828	0.936	0.997	0.000127621
Gkap1	5.13463e-09	0.395492	0.751	0.559	0.000130579
Nbea	6.37745e-09	0.308776	0.996	0.983	0.000162185
Sars	7.92456e-09	-0.375855	0.517	0.696	0.00020153
Stag1	8.55724e-09	0.357452	0.943	0.878	0.000217619
Sfmbt2	1.06282e-08	0.443067	0.4	0.189	0.000270287
Kcns3	1.10302e-08	-0.47494	0.253	0.472	0.000280509
Ncam1	1.15882e-08	0.396146	0.981	0.909	0.0002947
Afap1	1.42414e-08	-0.415944	0.347	0.559	0.000362173
Grin2a	1.45263e-08	-0.956176	0.558	0.752	0.000369419
Dusp10	1.49213e-08	-0.416176	0.125	0.318	0.000379465
R3hdm1	2.33782e-08	0.330019	0.966	0.895	0.00059453
Mlf2	2.74314e-08	-0.328925	0.351	0.563	0.000697608
Gm47423	3.03764e-08	-0.369503	0.283	0.49	0.000772501
Camk1	3.12421e-08	-0.33055	0.355	0.58	0.000794518
Frmd4a	4.32019e-08	0.279235	0.996	0.993	0.00109867
Rims4	4.66232e-08	-0.382834	0.37	0.591	0.00118568
Ahi1	4.97889e-08	0.397288	1	0.993	0.00126618
Gpatch8	5.10716e-08	0.361039	0.974	0.934	0.0012988
Efhd2	5.99428e-08	-0.263688	0.117	0.308	0.00152441
Hunk	6.69314e-08	-0.411245	0.106	0.283	0.00170213
Las1l	7.75102e-08	-0.345768	0.642	0.78	0.00197116
Plekho1	9.19949e-08	-0.332421	0.283	0.503	0.00233952
Dlx1as	9.80557e-08	-0.563357	0.306	0.49	0.00249366
4921534H16Rik	1.00873e-07	-0.425574	0.174	0.367	0.00256531
Dip2c	1.04684e-07	0.290895	0.977	0.965	0.00266223
Robo1	1.05158e-07	0.333409	0.966	0.958	0.00267428
Dlx6os1	1.09757e-07	-0.712334	0.581	0.682	0.00279123
Tfrc	1.1301e-07	0.428171	0.691	0.58	0.00287396
Calm1	1.20694e-07	-0.370685	0.83	0.934	0.00306938
Csmd3	1.43134e-07	0.381088	0.981	0.934	0.00364004
Zbtb20	1.53053e-07	0.571471	0.781	0.675	0.00389229
Rhobtb2	1.84163e-07	-0.307028	0.275	0.493	0.00468345
Usp2	2.05761e-07	-0.281664	0.2	0.402	0.00523272
Grip1os2	2.5457e-07	-0.480333	0.585	0.78	0.00647396
Herc1	2.85506e-07	0.279417	0.921	0.874	0.00726071
Stmn1	3.09281e-07	-0.412	0.257	0.451	0.00786533
Slc6a1	3.19629e-07	-0.499624	0.743	0.822	0.00812848
Mbd5	3.6372e-07	0.268219	0.966	0.941	0.00924976
Dok6	4.1048e-07	0.31284	0.921	0.843	0.0104389
Ndufa11	4.12147e-07	-0.337208	0.37	0.577	0.0104813
Hip1	4.12684e-07	-0.352711	0.257	0.451	0.010495
Upp2	4.40215e-07	0.382326	0.906	0.857	0.0111951
Chd2	4.67138e-07	0.314106	0.857	0.692	0.0118798
Pcp4	4.75888e-07	-0.606275	0.506	0.685	0.0121023
Gm42418	4.83351e-07	-0.305846	1	1	0.0122921
Phf21a	5.0255e-07	0.323853	0.857	0.71	0.0127803
Chuk	5.30395e-07	0.338995	0.683	0.51	0.0134885
Srsf11	5.55675e-07	0.273949	0.951	0.913	0.0141314
Cdh10	5.95173e-07	0.425055	0.774	0.629	0.0151359
Taf15	5.95555e-07	0.352319	0.834	0.752	0.0151455
Usp34	7.0071e-07	0.276355	0.97	0.941	0.0178197
Exoc4	7.41699e-07	0.274559	0.955	0.937	0.0188621
Eml6	8.23211e-07	0.314479	0.951	0.92	0.0209351
Mtf2	9.18017e-07	0.352098	0.702	0.577	0.0233461
Qk	1.11413e-06	-0.373258	0.781	0.895	0.0283334
Gm6994	1.26004e-06	-0.412818	0.226	0.402	0.032044
Gpi1	1.32307e-06	0.430413	0.74	0.636	0.0336469
Sh3rf3	1.47338e-06	-0.47494	0.751	0.86	0.0374695
Mir124a-1hg	1.56875e-06	-0.365426	0.781	0.857	0.0398949
Khdrbs3	1.60098e-06	-0.409557	0.536	0.685	0.0407146
Fam155a	1.64545e-06	0.269812	1	0.99	0.0418455
Tle2	2.03379e-06	-0.338735	0.294	0.476	0.0517214
Nova1	2.22036e-06	0.375697	0.543	0.35	0.0564661
Kcna1	2.35673e-06	-0.344328	0.294	0.462	0.0599339
Ccnt2	2.37543e-06	0.288951	0.774	0.629	0.0604095
Ctnna2	2.53992e-06	0.270984	1	1	0.0645926
Ell2	2.68874e-06	-0.271943	0.226	0.416	0.0683774
Syn2	2.84462e-06	-0.360071	0.921	0.951	0.0723414
Hmgn3	2.94132e-06	-0.36032	0.521	0.65	0.0748008
Ndufa4	3.16694e-06	-0.359817	0.709	0.822	0.0805384
Ubr3	3.70554e-06	0.255355	0.894	0.867	0.0942356
Ptms	3.75675e-06	-0.27355	0.366	0.559	0.095538
9330159F19Rik	4.20543e-06	0.258829	0.698	0.517	0.106948
Kcnd3	4.2213e-06	-0.438845	0.683	0.766	0.107352
Sub1	4.43579e-06	-0.26231	0.298	0.479	0.112807
Mir670hg	4.43756e-06	-0.371104	0.204	0.371	0.112851
Gpr176	4.44312e-06	-0.431074	0.475	0.65	0.112993
Rbm5	4.79964e-06	0.292522	0.838	0.738	0.12206
Ccnl2	5.20666e-06	0.338487	0.709	0.566	0.132411
Grid2	5.28867e-06	0.512668	0.804	0.668	0.134496
Gnas	5.65605e-06	-0.379874	0.943	0.983	0.143839
Eif5a	5.89728e-06	-0.261536	0.189	0.353	0.149974
Gnaq	6.13353e-06	0.277886	0.894	0.818	0.155982
Mirg	6.52395e-06	0.310805	0.796	0.675	0.165911
Sirt3	6.66023e-06	-0.25948	0.249	0.427	0.169376
Cemip	7.01419e-06	-0.540138	0.291	0.451	0.178378
Penk	7.10846e-06	-0.378477	0.189	0.364	0.180775
Gm21798	7.24e-06	-0.398223	0.423	0.587	0.18412
Mef2c	7.57758e-06	-0.547994	0.596	0.724	0.192705
Mrpl41	7.68172e-06	-0.282459	0.415	0.594	0.195354
Gabra2	7.85436e-06	0.293715	0.8	0.626	0.199744
Dach2	8.13858e-06	0.293089	0.283	0.129	0.206972
Tmsb4x	8.2711e-06	-0.417169	0.566	0.689	0.210342
Zbtb16	8.27658e-06	-0.471319	0.358	0.517	0.210482
Clstn3	9.37179e-06	-0.271067	0.592	0.745	0.238334
Luc7l3	9.64938e-06	0.302263	0.936	0.871	0.245393
Cdc42bpa	1.14547e-05	0.264685	0.894	0.864	0.291304
Atrx	1.18679e-05	0.262026	0.864	0.766	0.301814
March1	1.19515e-05	0.314037	0.872	0.741	0.303938
Xpo1	1.21131e-05	0.266382	0.615	0.451	0.308048
Eif1b	1.24689e-05	-0.263952	0.347	0.528	0.317096
Pthlh	1.25502e-05	-0.565913	0.166	0.304	0.319163
Lgi2	1.25563e-05	-0.462682	0.355	0.517	0.31932
Htr2c	1.26056e-05	0.491076	0.528	0.343	0.320574
Igsf11	1.26426e-05	-0.419868	0.238	0.392	0.321513
2210408I21Rik	1.30421e-05	0.319899	0.777	0.654	0.331674
Btbd9	1.33045e-05	0.304526	0.619	0.444	0.338347
Slc2a13	1.47387e-05	-0.412683	0.853	0.906	0.374821
Son	1.5198e-05	0.284989	0.985	0.955	0.386501
Rnf144b	1.56402e-05	-0.546721	0.453	0.566	0.397745
Scaper	1.61018e-05	0.337925	0.815	0.689	0.409486
Pnpt1	1.63545e-05	0.310137	0.736	0.608	0.415911
Dusp11	1.7185e-05	0.291785	0.679	0.531	0.437032
Rgs7bp	1.72168e-05	-0.315023	0.819	0.892	0.43784
Dgkb	1.75576e-05	0.267965	0.958	0.927	0.446507
Sparcl1	1.75622e-05	-0.302964	0.525	0.689	0.446624
Dlgap2	1.81698e-05	-0.326802	0.898	0.927	0.462075
Copg2	1.85671e-05	0.286413	0.743	0.626	0.47218
L3mbtl3	1.8984e-05	0.302209	0.445	0.28	0.482782
Akap9	1.95409e-05	0.256361	0.883	0.815	0.496946
Ftx	2.06216e-05	0.254106	0.936	0.853	0.524428
Wdfy3	2.10604e-05	0.272294	0.887	0.825	0.535588
Clstn2	2.18568e-05	-0.70047	0.585	0.668	0.55584
Zdhhc20	2.25335e-05	0.285485	0.721	0.584	0.573049
Pum1	2.4341e-05	0.327454	0.702	0.598	0.619016
Myo1e	2.57097e-05	-0.440625	0.128	0.262	0.653824
Frg1	2.89423e-05	-0.268489	0.426	0.591	0.736032
Gm15577	3.02533e-05	-0.254389	0.234	0.395	0.769371
Ywhah	3.3936e-05	-0.30236	0.419	0.573	0.863028
Crppa	3.48081e-05	0.266142	0.558	0.381	0.885204
Calm2	3.69497e-05	-0.295167	0.868	0.941	0.939668
Mttp	3.84541e-05	0.260965	0.498	0.332	0.977926
Fut9	3.96016e-05	0.300232	0.758	0.65	1
Rasa2	4.08117e-05	0.263679	0.543	0.385	1
Cbfa2t2	4.34343e-05	0.299543	0.683	0.556	1
Ahctf1	4.5094e-05	0.267447	0.536	0.392	1
Kcnip1	4.65252e-05	-0.511405	0.796	0.843	1
Camk1d	4.76969e-05	-0.278359	0.86	0.934	1
Cerk	4.79055e-05	-0.256045	0.419	0.584	1
Taf1d	4.86504e-05	0.294256	0.743	0.636	1
Cnr1	4.90436e-05	-0.510054	0.438	0.573	1
Cox6a2	5.00035e-05	-0.361411	0.249	0.395	1
Igfbp4	5.05027e-05	-0.403386	0.253	0.392	1
Adcy1	5.10637e-05	-0.351593	0.506	0.633	1
Nxph1	5.29618e-05	-0.412344	0.981	0.969	1
Scmh1	5.42676e-05	0.267109	0.857	0.815	1
Stac2	5.46522e-05	-0.270195	0.192	0.336	1
Gabrd	5.46862e-05	-0.304015	0.238	0.388	1
Jmjd1c	5.48964e-05	0.275032	0.872	0.818	1
Lrrc8b	5.64912e-05	-0.288271	0.366	0.51	1
Kit	5.9687e-05	-0.673331	0.558	0.584	1
Gm35188	6.81658e-05	-0.388125	0.736	0.853	1
Gm47027	7.03275e-05	-0.30945	0.366	0.517	1
Pitpnc1	7.18913e-05	-0.382872	0.543	0.661	1
Rps16	7.59122e-05	-0.256037	0.291	0.441	1
Sec14l1	8.28191e-05	-0.348787	0.457	0.563	1
Zfp532	8.5522e-05	0.288756	0.638	0.524	1
Grid1	9.07142e-05	0.329357	0.815	0.762	1
Catspere2	9.35639e-05	0.294447	0.494	0.35	1
Ndufs7	9.56409e-05	-0.256831	0.404	0.552	1
Cycs	0.000106102	-0.252547	0.268	0.42	1
Dlgap1	0.000120962	-0.296544	1	1	1
Rpl38	0.000122371	-0.25511	0.321	0.462	1
Rbm20	0.000140948	-0.286427	0.174	0.308	1
Npy	0.000144174	-1.4477	0.309	0.451	1
Parp8	0.000144903	0.283506	0.645	0.531	1
C130073E24Rik	0.000149852	0.345631	0.743	0.573	1
Rmst	0.000155428	0.333311	0.302	0.161	1
Ckb	0.000157999	-0.257709	0.834	0.913	1
Zfp950	0.000166509	0.251965	0.762	0.636	1
Gucy1a2	0.000171221	0.260664	0.747	0.661	1
Mdh1	0.000173243	-0.256963	0.845	0.895	1
Baz2b	0.000176526	0.26714	0.834	0.72	1
Sclt1	0.000182671	0.253413	0.826	0.776	1
B830012L14Rik	0.000218962	0.251637	0.789	0.685	1
Ehbp1	0.000228275	0.271321	0.879	0.874	1
4933432K03Rik	0.000241498	-0.257709	0.143	0.262	1
Nrsn1	0.0002458	-0.273988	0.434	0.57	1
Smg1	0.000254523	0.262472	0.789	0.72	1
A330015K06Rik	0.000261345	-0.414946	0.66	0.731	1
Mafb	0.000266293	-0.288667	0.242	0.378	1
Rbfox3	0.000271378	-0.308121	0.638	0.755	1
Tmx3	0.00027641	0.275832	0.604	0.497	1
Gm47283	0.000276754	0.36614	0.864	0.829	1
Camk2d	0.000278181	0.252376	0.868	0.731	1
Cep170	0.000281351	0.262298	0.668	0.556	1
Ccdc58	0.000291714	0.253614	0.502	0.353	1
Pnn	0.000314207	0.25977	0.823	0.787	1
Ncam2	0.000319986	0.285737	0.721	0.619	1
Nlgn1	0.00034132	0.302668	0.853	0.762	1
Ncald	0.000341588	-0.28597	0.792	0.881	1
Sox5os4	0.00038039	-0.32732	0.223	0.346	1
Mef2a	0.000426892	-0.312697	0.834	0.853	1
4930587E11Rik	0.000431465	-0.322804	0.343	0.479	1
Kcnc3	0.000440648	-0.270861	0.321	0.448	1
Kcnb2	0.00047486	0.289192	0.743	0.601	1
Slc35f4	0.000477824	-0.347352	0.611	0.696	1
Grk3	0.000488702	-0.327383	0.585	0.654	1
Fbxl5	0.000509862	0.27304	0.683	0.584	1
4930415C11Rik	0.000517262	-0.253668	0.453	0.573	1
Ankrd24	0.000524036	-0.266214	0.626	0.734	1
Dync2h1	0.000539077	0.280548	0.668	0.57	1
Crtac1	0.000577237	-0.4846	0.585	0.661	1
Cntn1	0.000609004	0.253228	0.928	0.899	1
Rph3a	0.000625677	-0.26259	0.54	0.647	1
Lin28b	0.000628326	0.349693	0.442	0.336	1
Cep112	0.000631911	0.302668	0.698	0.58	1
Lrrc4c	0.00063335	0.319593	0.955	0.885	1
Enox1	0.00066817	-0.462276	0.74	0.79	1
Vps37a	0.000670091	0.250809	0.547	0.437	1
Adamts17	0.000696828	-0.404094	0.611	0.699	1
Vps41	0.000700103	0.253734	0.634	0.542	1
Sox5	0.000719871	-0.396993	0.566	0.671	1
A230006K03Rik	0.000786864	0.318131	0.872	0.79	1
Syn3	0.000806411	0.296599	0.634	0.559	1
Lgi1	0.000854235	-0.276457	0.592	0.71	1
Elob	0.000908299	-0.255173	0.4	0.531	1
Gm1604a	0.000995835	-0.270533	0.423	0.556	1
Pard3	0.00103809	0.253758	0.634	0.528	1
Cdh12	0.00104937	0.318948	0.615	0.486	1
Astn2	0.00111738	-0.280909	0.97	0.969	1
Dync1i1	0.0011963	0.264829	0.864	0.839	1
Kcnj6	0.0012399	-0.296661	0.434	0.538	1
Iqsec3	0.00138824	-0.258573	0.642	0.745	1
Gm48091	0.00162929	-0.294367	0.547	0.643	1
Gabrb1	0.0016414	0.265219	0.891	0.762	1
Xrcc4	0.00166331	0.253189	0.404	0.297	1
Runx2	0.00167637	-0.353341	0.404	0.497	1
Opcml	0.00173635	-0.291322	0.981	0.99	1
Tmem132d	0.00180447	-0.308141	0.37	0.493	1
Gpr83	0.0018878	-0.344632	0.336	0.43	1
Adra1a	0.00191004	-0.317466	0.528	0.643	1
Fstl4	0.00191819	-0.370242	0.475	0.58	1
Rasgef1b	0.00206696	0.317521	0.464	0.378	1
Megf11	0.00232761	-0.417112	0.366	0.462	1
Cox5b	0.00242766	-0.263266	0.479	0.57	1
Tm6sf1	0.00249777	-0.251485	0.509	0.591	1
Inpp4b	0.00267235	0.272043	0.698	0.584	1
Gpc6	0.00281745	0.506277	0.642	0.535	1
Tshz2	0.00291343	0.343474	0.298	0.196	1
Rasgrf2	0.00309493	-0.338629	0.37	0.49	1
Tmem59	0.00350436	0.257999	0.706	0.65	1
Hcn1	0.00365088	-0.265844	0.792	0.853	1
Stard9	0.00367811	-0.267047	0.438	0.535	1
Tenm3	0.00368535	0.282718	0.86	0.797	1
Egfr	0.00391271	-0.566751	0.442	0.507	1
Prkca	0.00395761	-0.331035	0.706	0.759	1
Osbpl3	0.00395805	-0.268266	0.445	0.552	1
Iqsec1	0.00405999	-0.316005	0.796	0.836	1
Col19a1	0.00409234	-0.445596	0.457	0.552	1
Myo5b	0.00433039	-0.27797	0.17	0.269	1
Cdh13	0.00453213	-0.273113	0.789	0.811	1
A530058N18Rik	0.00462497	-0.285178	0.506	0.58	1
Vsnl1	0.0048047	-0.277413	0.872	0.906	1
Erbb4	0.00507824	-0.400213	0.947	0.962	1
Tiam1	0.00509897	-0.297124	0.725	0.794	1
Gm26871	0.00518469	0.262222	0.592	0.486	1
A830018L16Rik	0.00535362	-0.490318	0.385	0.49	1
Ptprm	0.00545532	-0.422198	0.668	0.752	1
St8sia4	0.00610832	-0.280008	0.423	0.507	1
Vwc2	0.00708476	-0.264648	0.687	0.748	1
Maf	0.00733752	-0.314792	0.46	0.556	1
Nwd2	0.00734146	-0.38025	0.423	0.49	1
Hs3st2	0.00812227	-0.387477	0.513	0.577	1
Ubash3b	0.00878795	-0.325249	0.415	0.503	1
Pcsk6	0.0113192	-0.351557	0.343	0.437	1
Kcnq3	0.0116207	-0.389677	0.74	0.752	1
Serpini1	0.0128877	-0.390961	0.408	0.486	1
Slc4a4	0.0141296	-0.317738	0.574	0.619	1
Ppargc1a	0.0158519	-0.251946	0.54	0.598	1
Schip1	0.0180654	0.261075	0.509	0.427	1
Nek7	0.0183083	-0.287598	0.306	0.374	1
Prkg1	0.0201881	0.456198	0.528	0.458	1
Cdh18	0.0205453	0.286544	0.728	0.622	1
Naaladl2	0.0211636	0.264082	0.657	0.619	1
Pcdh11x	0.0230677	0.344046	0.468	0.388	1
Cntn3	0.0286201	-0.250012	0.842	0.85	1
Etl4	0.0294134	-0.272742	0.774	0.811	1
St18	0.0298956	0.257428	0.543	0.479	1
Dcc	0.032343	0.260139	0.528	0.416	1
Gabrg3	0.0383389	-0.381617	0.834	0.822	1
Galnt14	0.0435374	-0.270481	0.645	0.703	1
Pde4b	0.0442061	0.295874	0.611	0.528	1
Pdzd2	0.0625999	-0.32527	0.264	0.329	1
Pvalb	0.0697817	-0.273582	0.215	0.259	1
Luzp2	0.0722296	-0.309009	0.755	0.794	1
Srgap1	0.0819028	-0.30363	0.464	0.5	1
Kcnc2	0.0969883	-0.255495	0.762	0.622	1
Slit2	0.11216	0.25852	0.358	0.308	1
Trps1	0.122425	-0.33801	0.758	0.78	1
Sst	0.131621	-0.96045	0.396	0.441	1
Alk	0.147345	-0.28379	0.706	0.759	1
Sdk1	0.179352	0.392724	0.294	0.255	1
Kctd16	0.203444	-0.409071	0.826	0.874	1
Kcnn2	0.251971	-0.274895	0.789	0.776	1
Unc5c	0.317246	-0.348648	0.728	0.734	1
Il1rapl2	0.331424	-0.447985	0.758	0.699	1
Cntnap5c	0.371598	-0.305015	0.426	0.441	1
Grm3	0.38734	-0.349409	0.6	0.619	1
Grm8	0.398349	-0.47494	0.309	0.322	1
Cpne4	0.444818	-0.334927	0.26	0.287	1
Nos1	0.526771	-0.410427	0.264	0.276	1
Fgf13	0.619476	-0.399601	0.732	0.717	1
Btbd11	0.66323	-0.261233	0.509	0.507	1

## Sheet: thiamine_cluster7R61vvsNTv
Column1	p_val	avg_log2FC	pct.1	pct.2	p_val_adj
Cmss1	2.16183e-24	-0.663312	0.991	1	5.49774e-20
Rpl13	2.18458e-22	-0.90751	0.786	0.966	5.55562e-18
Nkain2	1.75093e-21	1.1433	0.959	0.76	4.4528e-17
Cspg5	2.60683e-21	-1.00868	0.623	0.894	6.62942e-17
C1ql1	8.06016e-19	-0.879557	0.465	0.827	2.04978e-14
Gm38505	4.16511e-18	-0.925196	0.491	0.832	1.05923e-13
Pdgfra	2.4905e-17	-0.870919	0.623	0.866	6.3336e-13
S100a1	5.02093e-17	-0.777993	0.283	0.637	1.27687e-12
Olig1	1.24276e-16	-0.716893	0.638	0.894	3.16045e-12
Nlgn1	2.44863e-16	0.468171	1	1	6.22712e-12
Epn2	4.97683e-16	-0.647347	0.77	0.989	1.26566e-11
Megf11	8.9242e-16	-0.729148	0.44	0.832	2.26951e-11
Penk	1.92835e-15	-0.714771	0.179	0.514	4.90399e-11
Pcp4	2.2466e-15	-0.917942	0.572	0.804	5.71333e-11
St18	5.79586e-15	1.24579	0.572	0.201	1.47395e-10
Ckb	6.62374e-15	-0.618018	0.953	0.989	1.68448e-10
Olfm2	9.60474e-15	-0.579872	0.267	0.648	2.44258e-10
S100a16	2.36713e-14	-0.77705	0.399	0.715	6.01984e-10
Etv4	9.11906e-14	-0.552831	0.258	0.615	2.31907e-09
Tmem100	1.32787e-13	-0.652744	0.393	0.715	3.37692e-09
Kcnip3	1.76373e-13	-0.705444	0.519	0.804	4.48533e-09
Clasp2	3.4473e-13	0.564761	0.965	0.883	8.76683e-09
Cdo1	3.52929e-13	-0.558873	0.173	0.475	8.97533e-09
Samd4	4.67689e-13	-0.539561	0.28	0.62	1.18938e-08
Pak3	4.96417e-13	0.746128	0.843	0.659	1.26244e-08
Shc4	7.09427e-13	-0.603422	0.314	0.637	1.80414e-08
Ptprz1	9.74032e-13	-0.561869	0.903	0.961	2.47706e-08
Ednrb	1.21084e-12	-0.668147	0.333	0.642	3.07928e-08
Apod	1.23012e-12	0.892632	0.513	0.218	3.12832e-08
Xylt1	3.77698e-12	-0.562403	0.881	0.95	9.60523e-08
Ank2	4.15419e-12	0.539197	0.987	0.983	1.05645e-07
Gm20713	5.22091e-12	-0.630859	0.396	0.715	1.32773e-07
Vxn	7.71582e-12	-0.480597	0.289	0.615	1.96221e-07
Vcan	8.70541e-12	-0.611011	0.836	0.944	2.21387e-07
Cspg4	1.00656e-11	-0.541892	0.469	0.765	2.55978e-07
Abhd2	1.12817e-11	-0.593593	0.538	0.821	2.86906e-07
Pllp	1.33608e-11	-0.561179	0.541	0.793	3.39778e-07
Sox2ot	1.43502e-11	-0.482611	0.953	0.978	3.64939e-07
Sparcl1	1.78275e-11	-0.561088	0.459	0.737	4.53372e-07
Rbm39	1.93336e-11	0.419542	1	0.994	4.91672e-07
Dnah5	2.60265e-11	-0.549545	0.075	0.296	6.6188e-07
Gpc5	4.1582e-11	-0.680793	0.786	0.916	1.05747e-06
Lhfpl3	4.89281e-11	-0.482706	0.972	0.961	1.24429e-06
Gm3764	5.35246e-11	-0.558933	0.575	0.827	1.36118e-06
Tmem176a	5.57555e-11	-0.455687	0.204	0.497	1.41792e-06
Pou3f1	6.72243e-11	-0.443473	0.148	0.408	1.70958e-06
Plp1	6.77442e-11	0.474462	0.836	0.665	1.7228e-06
Cacng4	1.35278e-10	-0.575909	0.645	0.838	3.44024e-06
Ccnd1	1.37381e-10	-0.533456	0.204	0.475	3.49374e-06
Sgcd	1.75436e-10	0.522899	0.956	0.933	4.46151e-06
Clu	2.06893e-10	0.975319	0.544	0.313	5.2615e-06
Mif	2.9603e-10	-0.522141	0.374	0.67	7.52835e-06
Zeb1	3.16344e-10	-0.544435	0.94	0.95	8.04493e-06
Kcnk10	4.09636e-10	-0.538848	0.22	0.48	1.04174e-05
AW047730	5.03178e-10	-0.295746	0.06	0.257	1.27963e-05
Cdh18	7.6413e-10	0.599611	0.84	0.654	1.94326e-05
Ttyh2	1.03549e-09	0.515099	0.343	0.101	2.63337e-05
Armh4	1.04846e-09	-0.511838	0.478	0.721	2.66633e-05
Sgk1	1.18448e-09	-0.565515	0.362	0.626	3.01225e-05
4930445B16Rik	1.43743e-09	-0.550351	0.336	0.587	3.65552e-05
March1	2.25646e-09	-0.533642	0.805	0.894	5.73841e-05
App	2.87906e-09	0.450529	0.972	0.894	7.32174e-05
Mdk	3.40707e-09	-0.505528	0.242	0.497	8.66451e-05
Hip1r	3.6698e-09	-0.42494	0.296	0.57	9.33267e-05
Plpp4	5.25448e-09	-0.471438	0.371	0.648	0.000133627
Neu4	5.65654e-09	-0.58614	0.55	0.76	0.000143852
Epas1	6.20951e-09	-0.437449	0.148	0.374	0.000157914
Tnr	7.51941e-09	-0.483901	0.978	0.989	0.000191226
Ppp1r14b	7.86992e-09	-0.398855	0.258	0.514	0.00020014
Tubb2b	9.65371e-09	-0.41403	0.173	0.402	0.000245503
Grik2	9.6877e-09	0.448699	0.997	1	0.000246368
Prdx6	1.13222e-08	-0.390348	0.167	0.397	0.000287934
Trnp1	1.1411e-08	-0.429384	0.173	0.402	0.000290194
Hes5	1.17457e-08	-0.674605	0.236	0.475	0.000298705
Fabp7	1.26644e-08	-0.427327	0.23	0.475	0.000322069
Slc35b2	1.56815e-08	-0.276526	0.129	0.352	0.000398796
Emid1	1.67915e-08	-0.517201	0.431	0.676	0.000427025
Etv5	1.76399e-08	-0.394746	0.274	0.525	0.000448601
Nxph1	1.80873e-08	-0.454175	0.881	0.955	0.000459978
Sdc3	1.89578e-08	-0.436556	0.261	0.508	0.000482115
A330049N07Rik	1.98074e-08	0.547201	0.258	0.056	0.000503723
Npy	2.27667e-08	-0.352454	0.094	0.285	0.00057898
Exoc4	2.63586e-08	0.428265	0.947	0.911	0.000670325
Cthrc1	2.97611e-08	-0.359306	0.186	0.419	0.000756856
Chst9	3.5695e-08	-0.439121	0.11	0.307	0.00090776
Cadm2	3.6384e-08	0.286968	1	0.994	0.000925282
Rtl4	3.66242e-08	-0.605618	0.346	0.615	0.00093139
Rpl38	3.68556e-08	-0.450556	0.248	0.486	0.000937275
Kcnq1ot1	3.7507e-08	0.461969	0.921	0.788	0.000953839
Ogt	3.9042e-08	0.489394	0.877	0.799	0.000992877
Ntm	3.94552e-08	-0.335949	0.969	0.961	0.00100338
Ncan	4.14242e-08	-0.374755	0.214	0.447	0.00105346
Mpp6	4.32312e-08	-0.386845	0.305	0.564	0.00109941
Col11a1	4.58238e-08	-0.448138	0.201	0.43	0.00116534
Ppp1r1b	5.13869e-08	-0.359582	0.132	0.335	0.00130682
Pcdh9	5.34451e-08	0.299696	1	1	0.00135916
Ppp2r3a	5.5789e-08	0.535344	0.774	0.654	0.00141877
Plekho1	5.92465e-08	-0.259829	0.116	0.318	0.0015067
Dynll1	6.05079e-08	-0.528436	0.443	0.676	0.00153878
Arpp19	6.14715e-08	-0.394489	0.245	0.486	0.00156328
Grik3	6.34249e-08	-0.367163	0.208	0.447	0.00161296
Serpine2	6.47475e-08	-0.435141	0.858	0.933	0.00164659
Ddx5	6.54896e-08	0.449204	0.994	1	0.00166547
Map2	6.72222e-08	0.435023	0.969	0.927	0.00170953
Il1rapl1	6.87391e-08	0.306516	1	1	0.0017481
Ablim2	7.13024e-08	0.458617	0.638	0.397	0.00181329
Tenm4	7.9128e-08	0.388272	0.61	0.341	0.0020123
Spry1	8.93372e-08	-0.29419	0.116	0.313	0.00227193
Ostf1	9.61002e-08	-0.4333	0.302	0.536	0.00244392
Meg3	1.09259e-07	0.65271	0.984	0.955	0.00277857
Cd302	1.11699e-07	-0.311384	0.151	0.363	0.00284062
Ctnna2	1.13799e-07	0.364266	0.991	0.989	0.00289402
Camk1d	1.19524e-07	-0.339983	0.877	0.939	0.00303961
Rpl37	1.25535e-07	-0.396371	0.333	0.598	0.00319248
Tmem255b	1.32351e-07	-0.367163	0.119	0.307	0.00336583
Arhgap31	1.32908e-07	-0.436885	0.818	0.922	0.00337999
Inpp4b	1.51532e-07	-0.540636	0.346	0.559	0.00385361
Gm2164	1.65035e-07	-0.422684	0.314	0.559	0.00419701
G0s2	1.84496e-07	-0.427653	0.399	0.62	0.00469192
Kif19a	1.85829e-07	0.295739	0.346	0.117	0.00472581
Mir9-3hg	1.85852e-07	-0.424718	0.619	0.844	0.00472641
Bcl2	1.87464e-07	-0.333603	0.11	0.296	0.0047674
Zbtb20	1.91557e-07	0.332083	1	0.989	0.00487148
Shc3	1.98369e-07	-0.386549	0.264	0.503	0.00504473
Zdhhc14	2.07433e-07	0.389258	0.909	0.749	0.00527524
Robo2	2.09316e-07	0.471141	0.72	0.475	0.00532312
Aig1	2.1205e-07	0.495167	0.726	0.542	0.00539265
Epha6	2.17093e-07	0.36758	0.642	0.391	0.0055209
Olig2	2.25073e-07	-0.440665	0.487	0.715	0.00572382
Rarb	2.41649e-07	0.40972	0.717	0.469	0.00614538
Marc2	2.76674e-07	-0.391418	0.365	0.592	0.00703609
Nkain4	2.82618e-07	-0.260224	0.091	0.263	0.00718726
Reps2	2.9587e-07	0.543487	0.56	0.369	0.00752427
Dock9	3.04266e-07	-0.416269	0.711	0.86	0.00773778
Kif21a	3.22072e-07	0.425783	0.745	0.547	0.00819061
Ctxn1	3.34906e-07	-0.302256	0.142	0.346	0.00851699
Thsd7b	3.38313e-07	-0.31975	0.308	0.559	0.00860364
Mbnl2	3.53212e-07	0.390935	0.972	0.816	0.00898255
Vegfa	3.69301e-07	-0.41403	0.261	0.492	0.00939169
Ank3	3.88532e-07	0.355098	1	0.994	0.00988076
Luc7l2	4.079e-07	0.400539	0.984	0.961	0.0103733
Pxdc1	4.58171e-07	-0.296032	0.16	0.358	0.0116518
Lrch3	4.66703e-07	0.452454	0.711	0.553	0.0118687
Grid2	5.23348e-07	0.271592	0.994	1	0.0133093
Rlbp1	5.24372e-07	-0.305744	0.138	0.33	0.0133353
Rgcc	5.32343e-07	-0.450745	0.579	0.788	0.013538
Sulf2	5.87382e-07	-0.396752	0.563	0.743	0.0149377
Son	6.48909e-07	0.392223	1	0.989	0.0165024
A230006K03Rik	6.62856e-07	0.400903	0.384	0.173	0.0168571
6330411D24Rik	7.0221e-07	-0.288499	0.116	0.296	0.0178579
Orai1	7.29944e-07	-0.349412	0.283	0.497	0.0185632
Mt1	7.40289e-07	-0.437642	0.299	0.531	0.0188263
Ppfibp1	7.56658e-07	-0.430038	0.638	0.844	0.0192426
Rps11	8.25552e-07	-0.34998	0.362	0.62	0.0209946
Lpin2	1.00525e-06	-0.290201	0.267	0.508	0.0255644
Srsf11	1.11209e-06	0.374202	0.931	0.838	0.0282816
6330576A10Rik	1.11766e-06	-0.397832	0.204	0.391	0.0284233
Chst11	1.11918e-06	-0.364959	0.55	0.81	0.0284619
Slc13a5	1.13569e-06	-0.327521	0.145	0.324	0.0288818
Dbi	1.14294e-06	-0.465582	0.739	0.866	0.0290661
Marcksl1	1.14377e-06	-0.307215	0.126	0.302	0.0290873
S100a6	1.3552e-06	-0.407991	0.17	0.352	0.034464
Itgav	1.46891e-06	-0.382029	0.44	0.659	0.037356
Spred1	1.56245e-06	-0.379802	0.462	0.698	0.0397348
Phactr1	1.5894e-06	0.250144	0.991	0.944	0.0404201
Fgd4	1.69479e-06	0.436636	0.381	0.184	0.0431001
Atp1b2	1.7372e-06	-0.317315	0.126	0.296	0.0441788
Lingo2	1.76792e-06	0.390101	0.711	0.469	0.0449601
Spon1	1.82993e-06	-0.377941	0.67	0.894	0.0465369
Mtss2	1.83445e-06	-0.394371	0.531	0.743	0.0466518
Eif1b	1.87055e-06	-0.338742	0.371	0.598	0.0475699
Dpysl3	1.94545e-06	-0.446879	0.412	0.62	0.0494748
Cox8a	2.31962e-06	-0.422723	0.528	0.765	0.0589902
Dlg1	2.51279e-06	0.424398	0.84	0.754	0.0639029
Lbh	2.63475e-06	-0.33258	0.236	0.425	0.0670044
Lrrc4c	2.69064e-06	-0.323343	1	0.989	0.0684256
Prkca	2.7516e-06	0.400785	0.915	0.844	0.0699759
Camk1	2.83713e-06	-0.337726	0.264	0.464	0.0721512
Camk2n1	2.9582e-06	-0.340966	0.23	0.436	0.0752301
Foxp1	3.00998e-06	0.460149	0.918	0.849	0.0765469
Slc1a2	3.03657e-06	-0.392605	0.5	0.715	0.0772229
Fxyd6	3.17074e-06	0.565163	0.629	0.497	0.080635
Rpl35a	3.2021e-06	-0.354625	0.283	0.492	0.0814326
Prickle2	3.26143e-06	0.451899	0.918	0.765	0.0829414
Ndufa4	3.29732e-06	-0.400943	0.648	0.821	0.0838542
Ube2s	3.40985e-06	-0.30737	0.255	0.458	0.086716
Enpp2	3.49368e-06	0.530829	0.83	0.771	0.0888477
Tubb5	3.56713e-06	-0.341239	0.311	0.52	0.0907157
Rpl19	3.68568e-06	-0.389996	0.535	0.726	0.0937306
Rps25	3.74167e-06	-0.270127	0.258	0.48	0.0951544
Tmem176b	3.74601e-06	-0.391899	0.462	0.687	0.0952649
Rev3l	3.79133e-06	-0.405708	0.843	0.916	0.0964172
Hpca	3.8614e-06	-0.376366	0.173	0.352	0.0981994
Kank1	4.10335e-06	-0.392457	0.626	0.788	0.104352
Kcnip1	4.14121e-06	-0.368609	0.34	0.559	0.105315
P4ha1	4.15618e-06	-0.321954	0.33	0.542	0.105696
Timp4	4.30909e-06	-0.348006	0.274	0.48	0.109584
Galnt13	4.34111e-06	0.349612	0.94	0.855	0.110399
Etv1	4.45842e-06	-0.403516	0.305	0.514	0.113382
F3	4.54744e-06	-0.292635	0.113	0.279	0.115646
Ptn	4.6057e-06	-0.387729	0.94	0.972	0.117127
Rbm5	4.66019e-06	0.36999	0.852	0.76	0.118513
Shisa6	4.67187e-06	-0.303439	0.138	0.313	0.11881
Pmepa1	4.72854e-06	-0.444924	0.286	0.475	0.120251
Luc7l3	4.85081e-06	0.397557	0.909	0.816	0.123361
Rpl29	4.86355e-06	-0.388306	0.39	0.598	0.123685
Arid4b	5.25108e-06	0.414204	0.802	0.687	0.13354
Gm32509	5.30236e-06	-0.468762	0.635	0.804	0.134844
Kcnd3	5.84104e-06	-0.420683	0.45	0.637	0.148544
Macf1	5.96763e-06	0.354514	0.981	0.955	0.151763
Pard3	7.25263e-06	0.381758	0.846	0.788	0.184442
Uqcc2	7.26906e-06	-0.257472	0.129	0.296	0.184859
Ptpn5	7.60843e-06	-0.297098	0.242	0.436	0.19349
Slit3	8.01094e-06	0.258131	0.582	0.358	0.203726
Atp5j	8.14821e-06	-0.360788	0.371	0.575	0.207217
Ptms	8.24126e-06	-0.359582	0.311	0.508	0.209583
Plcl1	8.62077e-06	0.53898	0.852	0.698	0.219235
Flnb	8.66657e-06	0.508197	0.456	0.302	0.2204
Gm48091	8.72175e-06	-0.422854	0.308	0.48	0.221803
Traf4	9.8763e-06	-0.298918	0.248	0.441	0.251164
1700047M11Rik	9.89351e-06	0.485167	0.585	0.408	0.251602
Bcl6	1.00313e-05	-0.253872	0.123	0.279	0.255107
Ankrd11	1.00838e-05	-0.28507	0.855	0.927	0.256442
Ramp1	1.01737e-05	-0.355998	0.491	0.693	0.258728
Fez1	1.0355e-05	-0.350544	0.39	0.609	0.263339
Lypd6	1.05156e-05	-0.3283	0.189	0.369	0.267422
C1ql3	1.05772e-05	-0.287225	0.189	0.374	0.268988
Adcy8	1.06215e-05	-0.322299	0.145	0.307	0.270114
Mt3	1.07412e-05	-0.31097	0.33	0.542	0.273161
Calcrl	1.12504e-05	-0.34962	0.409	0.637	0.286108
Vwc2	1.14224e-05	-0.306583	0.186	0.363	0.290482
Syne1	1.17231e-05	0.372059	0.937	0.911	0.29813
Gm2a	1.17263e-05	-0.274562	0.374	0.609	0.298211
Vstm2b	1.21217e-05	-0.257073	0.248	0.447	0.308268
Pdzd2	1.25904e-05	-0.34794	0.443	0.67	0.320186
Klf9	1.25969e-05	-0.319089	0.157	0.33	0.320352
Rbfox1	1.2759e-05	-0.333977	0.969	0.927	0.324474
Trpm3	1.29977e-05	-0.487728	0.39	0.575	0.330545
Klhl29	1.34288e-05	0.318832	0.494	0.291	0.341508
Tle4	1.34591e-05	0.393325	0.742	0.553	0.342279
Akap6	1.36496e-05	0.296559	0.934	0.855	0.347123
Grin3a	1.37181e-05	-0.405053	0.67	0.821	0.348865
Plpp3	1.41991e-05	-0.385869	0.55	0.726	0.361097
Plk2	1.43828e-05	-0.300688	0.119	0.268	0.365769
Col27a1	1.45455e-05	0.357554	0.289	0.123	0.369907
Dusp15	1.52782e-05	0.439238	0.503	0.341	0.388539
Magi2	1.55532e-05	0.268446	1	0.989	0.395534
Chl1	1.57296e-05	-0.469525	0.45	0.631	0.400019
Scrg1	1.58794e-05	-0.395142	0.695	0.838	0.403828
Gjc3	1.64486e-05	-0.454793	0.789	0.899	0.418304
Trf	1.67969e-05	0.563508	0.346	0.184	0.427162
Dclk1	1.71844e-05	-0.332951	0.887	0.911	0.437016
A230057D06Rik	1.8512e-05	0.391342	0.912	0.816	0.470778
Srp14	1.87148e-05	-0.297385	0.192	0.363	0.475937
Jun	1.87849e-05	-0.315041	0.129	0.279	0.477719
Ugdh	1.9301e-05	-0.29141	0.418	0.631	0.490845
Rpl10a	2.03503e-05	-0.344644	0.425	0.609	0.517529
Nav3	2.06751e-05	-0.297146	0.972	0.939	0.525788
Marcks	2.06888e-05	-0.374891	0.619	0.81	0.526136
Selenof	2.10973e-05	-0.344737	0.39	0.581	0.536526
Phlda1	2.15889e-05	-0.380793	0.292	0.464	0.549028
Retreg1	2.17797e-05	0.425862	0.403	0.24	0.553879
Rps3a1	2.24469e-05	-0.267664	0.403	0.626	0.570848
Rps23	2.25454e-05	-0.300373	0.255	0.441	0.573351
Alk	2.37215e-05	-0.463728	0.23	0.385	0.603262
Tenm3	2.39521e-05	0.417987	0.613	0.419	0.609125
Rps26	2.50158e-05	-0.322927	0.277	0.458	0.636177
Stxbp5l	2.53755e-05	0.339819	0.862	0.698	0.645323
Sh3bp4	2.58528e-05	-0.324922	0.358	0.547	0.657463
Ptov1	2.59516e-05	-0.333372	0.248	0.419	0.659976
Mmp15	2.62367e-05	-0.360979	0.179	0.335	0.667224
Tmem121	2.75652e-05	-0.282393	0.204	0.374	0.701011
Map7	2.87055e-05	0.360993	0.736	0.592	0.730011
Chd9	2.9199e-05	0.274362	0.909	0.86	0.742559
Cdh13	2.98517e-05	-0.351969	0.698	0.888	0.759159
Rpl24	3.02325e-05	-0.421691	0.45	0.637	0.768843
Kcnip4	3.03916e-05	0.294346	0.871	0.698	0.772888
Arhgap23	3.09585e-05	0.441274	0.44	0.274	0.787305
Metrn	3.12307e-05	-0.265964	0.164	0.324	0.794227
Rplp1	3.12888e-05	-0.296879	0.497	0.698	0.795704
Ndufb7	3.1924e-05	-0.289959	0.242	0.43	0.81186
Arl2bp	3.29625e-05	-0.305848	0.393	0.592	0.838271
Tasor	3.40547e-05	0.38812	0.682	0.581	0.866044
Sox4	3.41116e-05	-0.354498	0.302	0.497	0.867492
Iqsec1	3.41472e-05	0.359862	0.428	0.257	0.868397
Srgap1	3.56049e-05	-0.260361	0.736	0.866	0.905469
Galnt3	3.72073e-05	-0.346187	0.428	0.598	0.946219
Fbxl17	3.96015e-05	0.278246	0.903	0.765	1
Ppp1r14c	4.19876e-05	-0.289213	0.358	0.575	1
Zcchc24	4.33118e-05	-0.272829	0.403	0.603	1
Btf3	4.38232e-05	-0.313646	0.305	0.486	1
Wls	4.44127e-05	0.481116	0.509	0.352	1
Thrb	4.45748e-05	0.351039	0.755	0.648	1
Fbxl16	4.61178e-05	-0.312817	0.116	0.251	1
Ptgds	4.63886e-05	0.768209	0.494	0.341	1
Arhgap5	4.65074e-05	0.403153	0.635	0.525	1
Nkain3	4.71131e-05	-0.486961	0.459	0.62	1
Gm47283	4.82028e-05	0.415037	0.821	0.76	1
Wdr33	4.90107e-05	0.36766	0.739	0.626	1
Rps17	4.9128e-05	-0.356886	0.208	0.363	1
Hlf	4.94919e-05	-0.278621	0.192	0.358	1
Limch1	5.01496e-05	0.35473	0.726	0.587	1
Hexb	5.19068e-05	-0.265454	0.242	0.419	1
Cntnap2	5.22546e-05	0.457152	0.881	0.715	1
Ccser2	5.42397e-05	0.326546	0.714	0.57	1
Dapk1	5.4256e-05	0.432281	0.289	0.145	1
Grik1	5.46841e-05	-0.286591	0.321	0.514	1
Srgap3	5.64077e-05	0.3335	0.752	0.609	1
Scg5	6.31107e-05	0.371647	0.881	0.782	1
Psmb3	6.43388e-05	-0.268662	0.286	0.464	1
Tspan7	6.73757e-05	-0.293316	0.849	0.916	1
Atp8a1	6.83652e-05	0.34439	0.896	0.749	1
Runx1t1	6.93862e-05	0.265844	0.673	0.464	1
Akt3	7.41583e-05	0.311017	0.953	0.916	1
Nexmif	8.2878e-05	-0.311492	0.302	0.48	1
Drap1	8.41288e-05	-0.303976	0.22	0.38	1
Kcnh8	8.4243e-05	-0.33104	0.597	0.749	1
Spry2	8.45361e-05	-0.283243	0.186	0.335	1
Tnrc6c	8.95914e-05	0.283408	0.931	0.855	1
Cntn4	9.04114e-05	-0.314494	0.95	0.939	1
Ndufa2	9.27618e-05	-0.251465	0.17	0.318	1
Sfr1	9.37202e-05	-0.265166	0.189	0.346	1
Acap2	9.38933e-05	0.293223	0.739	0.564	1
Gpcpd1	9.47786e-05	0.35843	0.843	0.765	1
Rpl8	9.90776e-05	-0.34815	0.45	0.609	1
Nalcn	0.000100826	0.309064	0.906	0.799	1
Mgat4c	0.000101468	0.280356	0.686	0.469	1
Cntnap5a	0.00010235	0.329231	0.447	0.268	1
Hspe1	0.000104082	-0.305047	0.173	0.318	1
Syt1	0.000106365	0.354658	0.868	0.726	1
Csnk2a2	0.000106584	-0.307114	0.428	0.637	1
Sgms1	0.00010933	-0.272539	0.418	0.62	1
Ralgps1	0.000112918	0.398885	0.61	0.486	1
Pitpnc1	0.000113375	-0.251793	0.403	0.62	1
Nrgn	0.000118775	-0.435444	0.597	0.709	1
Nedd8	0.000126506	-0.269822	0.217	0.374	1
Atp5o	0.000127705	-0.26381	0.324	0.52	1
Astn1	0.000130049	0.346549	0.811	0.777	1
Dscam	0.000131486	-0.28712	0.972	0.994	1
Gm4876	0.000133815	-0.359114	0.739	0.849	1
Frmd4b	0.000136941	0.302844	0.437	0.251	1
Rps20	0.000141777	-0.283221	0.283	0.453	1
Polg	0.000143329	-0.289363	0.255	0.419	1
Macrod1	0.000147282	-0.256144	0.349	0.542	1
Cfap20	0.000149275	-0.309515	0.396	0.564	1
Tnpo1	0.00015171	-0.3423	0.503	0.698	1
Mmd2	0.000153743	-0.306032	0.365	0.536	1
Cd63	0.000161172	-0.274654	0.352	0.525	1
Cadm1	0.000168795	0.289056	0.934	0.899	1
Zfp385b	0.000168868	0.267301	0.579	0.385	1
Gls	0.000183331	0.293417	0.742	0.587	1
Rpl11	0.000191552	-0.309396	0.469	0.654	1
Pbx1	0.000194879	0.296847	0.937	0.899	1
Mapre2	0.000200174	0.361539	0.654	0.497	1
Tef	0.000200429	-0.263117	0.33	0.503	1
Neo1	0.000203213	0.309003	0.761	0.687	1
Tmsb4x	0.00020615	-0.339612	0.619	0.737	1
Atp6v0e	0.000207006	-0.339506	0.487	0.626	1
Mmp16	0.000208668	-0.365481	0.865	0.911	1
Aopep	0.000218366	0.273471	0.796	0.687	1
Sipa1l1	0.000218544	0.319857	0.777	0.726	1
Gatm	0.00022028	0.490305	0.701	0.648	1
Rpl7a	0.000221288	-0.304454	0.374	0.531	1
Bach2	0.000221417	-0.288858	0.519	0.709	1
Kcnk2	0.000227711	-0.388495	0.409	0.575	1
Taok3	0.000228149	-0.315382	0.299	0.453	1
Bcan	0.000231929	-0.296707	0.733	0.838	1
Zcchc7	0.000235473	0.271103	0.969	0.911	1
Snhg11	0.000240868	0.447276	0.959	0.911	1
Ppib	0.000241854	-0.293091	0.689	0.832	1
Psma4	0.000246459	-0.274592	0.208	0.346	1
Myo10	0.000248602	-0.281135	0.333	0.497	1
Gpatch8	0.000250155	0.337868	0.94	0.905	1
Fam172a	0.000255622	0.307965	0.887	0.771	1
Eid1	0.000260089	0.347615	0.472	0.324	1
Cdh19	0.000263136	0.502985	0.478	0.346	1
Kcnq5	0.000267438	0.348986	0.943	0.866	1
Reep1	0.000272569	-0.281937	0.39	0.564	1
Rps16	0.000273735	-0.2701	0.305	0.469	1
Gpt2	0.000279489	-0.337532	0.453	0.609	1
Sh3rf3	0.000281537	-0.278198	0.255	0.413	1
Elmo1	0.000287204	0.268046	0.881	0.788	1
Mir99ahg	0.000289222	0.299814	0.972	0.927	1
Atp5j2	0.000293153	-0.290367	0.311	0.475	1
Ubc	0.00029696	-0.310462	0.421	0.587	1
Polr2a	0.00029698	0.334315	0.314	0.179	1
Adam12	0.000297546	-0.299882	0.513	0.687	1
Cask	0.000298013	-0.318805	0.818	0.894	1
Prkn	0.000312582	0.279759	0.975	0.927	1
Sept7	0.000313734	-0.321807	0.789	0.849	1
Eps8	0.000322135	-0.267188	0.381	0.564	1
Sumo2	0.000330978	-0.267188	0.443	0.62	1
Rps15	0.000331273	-0.267722	0.355	0.531	1
Plekha5	0.00033499	0.309612	0.824	0.665	1
Zdhhc20	0.000335218	0.289253	0.632	0.486	1
Plxdc2	0.00034133	0.418344	0.503	0.363	1
Tmem117	0.000341526	0.39572	0.33	0.184	1
Ints6l	0.000342642	0.341416	0.497	0.374	1
Krtcap2	0.000346953	-0.275132	0.283	0.453	1
Jmjd1c	0.00036049	0.279038	0.921	0.832	1
Far1	0.0003641	0.345649	0.597	0.475	1
Mapk4	0.000367062	-0.268434	0.217	0.369	1
S100a13	0.000378685	-0.312123	0.245	0.391	1
Atp5md	0.000385889	-0.276298	0.214	0.363	1
Cfl1	0.000396519	-0.34016	0.453	0.587	1
Rgs20	0.000398326	-0.305029	0.349	0.514	1
Edil3	0.000417194	0.401847	0.934	0.866	1
Itga9	0.00042271	-0.404101	0.541	0.665	1
Tpm1	0.00043094	-0.258245	0.601	0.76	1
Itpr2	0.000442372	-0.353729	0.695	0.872	1
Mbd5	0.000464598	0.281056	0.956	0.899	1
Plekhm3	0.000493202	0.333461	0.368	0.235	1
Dgki	0.000495539	0.271963	0.887	0.793	1
Apbb2	0.00050387	0.326804	0.783	0.67	1
AI480526	0.000505012	0.329692	0.393	0.257	1
Rbm6	0.000507698	0.272274	0.777	0.676	1
Rps27a	0.000511237	-0.2934	0.377	0.542	1
Arnt2	0.000519901	-0.322107	0.478	0.62	1
Rpl41	0.000540666	-0.298302	0.484	0.659	1
Guf1	0.000544217	0.307329	0.365	0.229	1
Rpl23	0.000544663	-0.25656	0.333	0.497	1
Klhl5	0.000575269	-0.303253	0.572	0.704	1
Smg6	0.000575814	0.276286	0.692	0.575	1
Snx1	0.000589206	-0.31036	0.516	0.654	1
Rpl18	0.000603926	-0.300199	0.525	0.682	1
Sema3d	0.000632228	-0.290786	0.619	0.754	1
Chd4	0.000635041	-0.263022	0.484	0.654	1
Cdv3	0.000643933	-0.265901	0.258	0.402	1
Grin2b	0.000669026	0.328474	0.755	0.587	1
Naaladl2	0.000672609	0.458562	0.827	0.793	1
Rps14	0.000673338	-0.282053	0.296	0.441	1
Zswim5	0.000689493	-0.337365	0.412	0.57	1
H2afz	0.000756268	-0.401114	0.409	0.559	1
Hsd17b12	0.000769822	-0.26088	0.39	0.542	1
Ptprm	0.000771678	-0.303825	0.472	0.642	1
Myo9a	0.0007772	0.287354	0.827	0.715	1
Kmt2e	0.000791283	0.352082	0.774	0.693	1
0610040J01Rik	0.000836448	-0.254831	0.286	0.43	1
Psenen	0.000847339	-0.268866	0.327	0.469	1
Cald1	0.00087776	0.367855	0.695	0.603	1
Cmtm5	0.000882512	0.325655	0.406	0.274	1
Kidins220	0.000906688	0.256255	0.818	0.704	1
Hip1	0.000924443	-0.284747	0.601	0.721	1
Rpl21	0.000933425	-0.300105	0.443	0.62	1
Gnb1	0.000935742	0.260745	0.695	0.587	1
Tafa1	0.000966761	-0.306442	0.453	0.62	1
Camk2d	0.000970418	0.358356	0.601	0.48	1
Rbm25	0.000983128	0.256064	0.843	0.765	1
Gad1	0.0010045	-0.263713	0.267	0.408	1
Gpr37l1	0.00102741	-0.279019	0.56	0.704	1
Rps27	0.00103596	-0.250205	0.305	0.453	1
Prune2	0.00105548	0.315864	0.55	0.419	1
Fip1l1	0.0010576	-0.350095	0.484	0.609	1
St5	0.00107325	0.313155	0.311	0.19	1
Cdh8	0.00109184	0.278356	0.544	0.38	1
Galntl6	0.00111046	0.312109	0.739	0.542	1
Cobl	0.00114499	-0.268651	0.632	0.771	1
Sox10	0.00114824	-0.290371	0.83	0.899	1
Ntn1	0.00116853	-0.289213	0.377	0.52	1
Pstpip2	0.00125091	-0.275675	0.223	0.352	1
Arhgap32	0.00127984	0.296627	0.667	0.536	1
Baz2b	0.00130085	0.266648	0.887	0.788	1
Sf3b6	0.00136311	-0.257401	0.333	0.464	1
Dock3	0.0014043	0.253858	0.947	0.899	1
Cacna1a	0.00142304	0.255678	0.928	0.855	1
Nrxn2	0.00148429	-0.300162	0.676	0.777	1
Psma7	0.00169505	-0.260679	0.302	0.436	1
Calm2	0.00169878	-0.28149	0.918	0.905	1
Shtn1	0.0017137	0.30007	0.481	0.352	1
Tspan5	0.00173636	0.312227	0.544	0.419	1
Vapa	0.00173822	-0.2513	0.469	0.626	1
Ralyl	0.00173908	0.258915	0.984	0.95	1
Cdk12	0.00174416	0.31193	0.657	0.553	1
Fam234a	0.00178301	0.364614	0.421	0.307	1
Dnajc6	0.00195937	0.254737	0.261	0.151	1
Tafa2	0.00195946	-0.282894	0.497	0.67	1
Nsd3	0.00199607	0.260914	0.708	0.626	1
Setbp1	0.00204702	0.277753	0.833	0.721	1
Sbf2	0.00207108	0.264129	0.855	0.788	1
Tuba1a	0.0021517	-0.392489	0.858	0.911	1
Tcf12	0.00218101	0.276163	0.953	0.922	1
E130114P18Rik	0.00222587	-0.284107	0.481	0.615	1
Slc4a10	0.00223318	0.255136	0.686	0.553	1
Fam120c	0.00223991	0.305359	0.406	0.285	1
Atrx	0.00224792	0.262746	0.799	0.721	1
Lrp1	0.00238215	-0.265466	0.66	0.782	1
Matn4	0.00238253	-0.271124	0.679	0.76	1
Rps24	0.00242665	-0.288499	0.368	0.486	1
Hs2st1	0.00245601	-0.252524	0.453	0.57	1
St6galnac3	0.00250106	0.291909	0.723	0.598	1
Cntn6	0.00250813	0.373769	0.808	0.799	1
Cyth1	0.00260038	0.30728	0.302	0.196	1
Snx2	0.00262189	0.273214	0.377	0.263	1
Col18a1	0.00271243	0.257233	0.267	0.156	1
C130073E24Rik	0.00288486	0.259179	0.453	0.318	1
Snx22	0.0030139	-0.25801	0.211	0.324	1
Gng3	0.00309723	-0.26529	0.377	0.503	1
Pde4b	0.00309969	0.269096	1	0.994	1
1110051M20Rik	0.00318285	0.252727	0.601	0.508	1
Scd2	0.00318365	0.258396	0.824	0.743	1
Copg2	0.00325106	0.314071	0.525	0.469	1
Sema3e	0.00327781	-0.323176	0.283	0.402	1
Arhgap26	0.00328183	0.276214	0.484	0.363	1
Trim2	0.00340536	0.255136	0.733	0.615	1
A330076H08Rik	0.00341575	0.293582	0.601	0.503	1
Stk32a	0.0034439	-0.285507	0.553	0.693	1
Nebl	0.00349753	0.302177	0.893	0.81	1
Mitf	0.00350762	0.277575	0.553	0.447	1
Rian	0.00360338	0.304021	0.686	0.559	1
Gm20642	0.00364572	-0.260474	0.274	0.402	1
Tra2a	0.00366047	0.260379	0.925	0.899	1
Rnf13	0.00410995	0.272604	0.528	0.441	1
Rsrc1	0.00414902	0.26526	0.676	0.587	1
Sgcz	0.00426787	-0.294021	0.962	0.922	1
Slc12a6	0.00449406	0.326483	0.566	0.497	1
Chm	0.00470351	0.250955	0.421	0.324	1
Itm2c	0.00490583	0.324649	0.783	0.793	1
B3galt1	0.00497557	0.29676	0.918	0.883	1
Cog5	0.00528773	0.250617	0.629	0.553	1
Usp9x	0.00535254	0.33981	0.519	0.464	1
Smoc1	0.00545268	0.28893	0.434	0.335	1
Tbc1d5	0.00546666	0.270797	0.871	0.81	1
Snrnp48	0.00556657	0.257089	0.544	0.475	1
Pde1c	0.00574325	0.333762	0.594	0.492	1
Rbms3	0.00589459	-0.26985	0.56	0.62	1
Rufy3	0.00597836	0.267085	0.61	0.575	1
Rap2a	0.00626591	-0.253382	0.267	0.391	1
Htr2c	0.00630382	0.270041	0.258	0.156	1
Srcin1	0.00637121	0.276286	0.327	0.223	1
Dpp10	0.00639905	-0.261229	0.921	0.922	1
Lncpint	0.0065043	0.254737	0.748	0.67	1
Lrfn5	0.0065156	0.29921	0.871	0.76	1
Fhit	0.00683218	-0.341214	0.516	0.642	1
Sh3kbp1	0.00702989	0.290672	0.513	0.402	1
Rnpc3	0.00792544	0.266557	0.698	0.631	1
Tmtc2	0.00887525	0.30582	0.814	0.777	1
Map4k5	0.00897882	0.273652	0.566	0.503	1
Asb3	0.00915594	0.266731	0.569	0.514	1
Gpr17	0.00932084	-0.344516	0.443	0.559	1
Pkp4	0.00936059	0.285229	0.553	0.458	1
Lims2	0.0097512	-0.280174	0.296	0.408	1
Ptprd	0.00982328	0.25044	0.991	0.933	1
Ranbp17	0.0101786	0.312405	0.547	0.497	1
Pibf1	0.011275	0.25618	0.553	0.492	1
Epb41l4b	0.0113476	0.258739	0.374	0.279	1
Metap1d	0.0122522	0.321713	0.484	0.43	1
Sclt1	0.012463	0.264464	0.519	0.436	1
Epb41l3	0.0129158	0.263191	0.434	0.346	1
Tox3	0.0129479	-0.272972	0.45	0.536	1
Mir100hg	0.0137739	0.284503	0.95	0.911	1
Pak1	0.0150109	0.28168	0.428	0.358	1
Jarid2	0.0151245	0.258184	0.642	0.581	1
Dynll2	0.0158459	-0.298181	0.226	0.313	1
Bcas3	0.0170098	0.259742	0.78	0.715	1
Atp9a	0.0177354	0.260368	0.566	0.514	1
Sh3rf1	0.0177896	-0.322689	0.472	0.57	1
Zfp950	0.019013	0.267837	0.748	0.709	1
Ppp1r16b	0.0197385	0.262596	0.531	0.469	1
Zfp36l1	0.0225845	-0.250677	0.491	0.564	1
Pcdh11x	0.0261414	0.251423	0.871	0.866	1
Meis2	0.0266268	0.26077	0.874	0.804	1
Lima1	0.0271419	-0.262483	0.465	0.542	1
Fryl	0.0276946	0.251061	0.698	0.693	1
Tox	0.0296235	0.260784	0.748	0.76	1
Frmd4a	0.0299734	-0.472303	0.796	0.665	1
Qk	0.034936	-0.264094	0.994	1	1
Zfp532	0.041023	0.270789	0.491	0.441	1
Mpped2	0.0411956	0.258923	0.862	0.827	1
Gm16759	0.0532865	0.263464	0.289	0.229	1
Ifi27	0.0555598	0.275902	0.591	0.57	1
2210408I21Rik	0.0581793	0.251777	0.506	0.453	1
Usp29	0.0653679	-0.253093	0.264	0.33	1
Polb	0.0774823	0.253268	0.484	0.475	1
Fam13c	0.130635	-0.2825	0.296	0.369	1
Pde10a	0.158468	-0.333384	0.874	0.838	1
Rgs9	0.169927	-0.26977	0.506	0.531	1
Gm13052	0.19667	-0.296256	0.267	0.313	1
Pik3r3	0.204867	-0.564665	0.34	0.397	1
Tmem108	0.207415	-0.381376	0.676	0.726	1
Tns3	0.492809	-0.272062	0.698	0.721	1
Phyhipl	0.493623	-0.316419	0.484	0.514	1
Sirt2	0.628987	-0.291019	0.613	0.57	1
Epb41l2	0.710099	-0.364664	0.393	0.38	1
Ust	0.906228	-0.261783	0.664	0.709	1
9630013A20Rik	0.928431	-0.625975	0.327	0.318	1

## Sheet: thiamine_cluster8R61vvsNTv
Column1	p_val	avg_log2FC	pct.1	pct.2	p_val_adj
Cmss1	1.39841e-25	-0.942328	0.994	1	3.55629e-21
Nrgn	1.94678e-15	-0.713092	0.819	0.974	4.95087e-11
Pcp4	3.31317e-15	-0.800712	0.856	0.974	8.42572e-11
Tmsb4x	2.74193e-13	-0.786207	0.981	0.987	6.973e-09
Calm2	7.61744e-13	-0.660113	0.956	0.991	1.93719e-08
Grid2	4.79798e-12	0.773254	1	0.983	1.22017e-07
Gm42418	3.61809e-11	-0.474886	1	1	9.20116e-07
Ralyl	1.48198e-10	0.579426	0.95	0.905	3.76881e-06
Lrrc4c	3.53729e-10	0.643257	0.994	0.991	8.99569e-06
Pcdh9	4.55282e-10	0.972396	0.994	0.991	1.15783e-05
Robo1	7.38395e-10	0.796536	0.981	0.944	1.87781e-05
Tmem117	2.19673e-09	0.601756	0.412	0.164	5.5865e-05
Cst3	5.67099e-09	-0.753866	1	1	0.000144219
Mdga2	6.0688e-09	0.456338	0.994	0.991	0.000154336
Nkain2	1.59635e-08	0.826506	1	1	0.000405967
Ctnna2	2.65198e-08	0.685913	1	0.978	0.000674425
Auts2	2.93275e-08	0.400683	1	1	0.000745826
Lsamp	3.50291e-08	1.0151	0.994	0.978	0.000890826
Penk	4.36672e-08	-0.814558	0.375	0.573	0.0011105
Cadm2	4.62792e-08	0.593461	1	0.991	0.00117693
Ptprd	8.59375e-08	0.605955	1	0.991	0.00218548
Il1rapl1	8.68514e-08	0.554736	1	0.991	0.00220872
Ckb	8.71617e-08	-0.544437	0.975	0.996	0.00221661
Dlg2	1.12782e-07	0.635004	1	1	0.00286817
Tmtc2	1.30508e-07	0.629989	0.512	0.276	0.00331895
Hexb	1.48623e-07	-0.49059	0.969	0.978	0.00377964
Magi2	1.84534e-07	0.706413	1	1	0.00469288
Nlgn1	2.67916e-07	0.608841	0.994	0.987	0.00681336
Slc1a3	3.24694e-07	0.558713	0.512	0.267	0.00825729
Selplg	3.51033e-07	-0.541426	0.719	0.862	0.00892712
C1qb	4.23701e-07	-0.667701	0.85	0.897	0.0107751
Atp11a	9.24952e-07	0.337953	0.269	0.082	0.0235224
Ltc4s	1.28946e-06	-0.617799	0.456	0.651	0.0327923
Ncam2	1.41328e-06	0.582595	0.981	0.974	0.0359412
Fcer1g	1.71075e-06	-0.628505	0.488	0.69	0.043506
C1qc	1.84655e-06	-0.527867	0.863	0.909	0.0469595
Cdc42bpa	1.84967e-06	0.346048	0.981	0.948	0.0470389
Rab30	2.05711e-06	0.399634	0.281	0.099	0.0523144
AY036118	2.50792e-06	-0.365115	1	1	0.0637788
Ctss	2.51278e-06	-0.566419	0.787	0.866	0.0639024
Glrb	2.87997e-06	0.371517	0.519	0.284	0.0732404
Cdh20	3.24343e-06	0.849211	0.262	0.095	0.0824836
2210408F21Rik	3.45709e-06	0.344141	0.269	0.086	0.0879172
Exoc2	3.72458e-06	0.38405	0.419	0.198	0.0947199
Acyp2	4.24631e-06	0.365038	0.5	0.28	0.107988
Stox2	4.98546e-06	0.265524	0.963	0.944	0.126785
Akap6	5.51495e-06	0.342472	0.969	0.978	0.140251
4930402H24Rik	5.80716e-06	0.343408	0.969	0.948	0.147682
9330182L06Rik	6.09218e-06	0.353637	0.25	0.086	0.15493
Calm1	7.09369e-06	-0.388528	0.944	0.996	0.1804
Lrp1b	8.17333e-06	0.687548	1	1	0.207856
Anks1b	8.60644e-06	0.385363	1	0.987	0.21887
Hpgd	9.79268e-06	-0.538372	0.394	0.595	0.249038
Cdk8	1.09011e-05	-0.382723	0.894	0.97	0.277225
Tmem178b	1.128e-05	0.34913	0.988	0.974	0.286862
C1qa	1.1851e-05	-0.504223	0.869	0.897	0.301383
Pag1	1.29321e-05	-0.406314	0.787	0.884	0.328877
Rc3h2	1.29842e-05	0.376523	0.488	0.272	0.330202
Letm2	1.30498e-05	0.302165	0.325	0.134	0.331869
Gria4	1.48843e-05	0.337654	0.969	0.944	0.378524
Mir100hg	1.49166e-05	0.433762	0.975	0.953	0.379343
Taf2	1.69248e-05	0.28477	0.269	0.099	0.430414
Zfp536	1.75318e-05	0.587127	0.488	0.28	0.44585
Dync2h1	1.94043e-05	0.311493	0.462	0.241	0.493472
Ctnnd2	2.19288e-05	0.397725	0.969	0.966	0.557672
Txndc16	2.27431e-05	0.357596	0.375	0.181	0.578381
Ppp6c	2.48687e-05	0.354506	0.338	0.151	0.632436
Tyrobp	2.83976e-05	-0.546048	0.606	0.711	0.722179
Gpatch2	3.29031e-05	0.318878	0.35	0.164	0.83676
Magi3	3.39947e-05	0.385147	0.294	0.125	0.864519
Prkdc	3.64479e-05	0.361421	0.331	0.155	0.926907
Ccser1	3.98737e-05	0.465664	0.969	0.944	1
Jazf1	4.07898e-05	0.369804	0.381	0.203	1
Tpt1	4.34764e-05	-0.517386	0.319	0.483	1
Sh3d19	4.41996e-05	0.484888	0.256	0.103	1
Adgrl3	5.40065e-05	0.403569	0.963	0.953	1
Sp4	5.46809e-05	0.317496	0.356	0.172	1
Csmd1	5.98335e-05	0.572798	0.969	0.957	1
Ank3	5.98981e-05	0.307505	1	0.996	1
Nova1	6.30875e-05	0.340047	0.331	0.155	1
Slc38a6	6.58994e-05	0.294596	0.288	0.121	1
Atp2b1	6.75878e-05	-0.415337	0.975	0.983	1
Ankrd28	7.37848e-05	0.319862	0.919	0.866	1
Sgcz	7.91896e-05	0.694346	0.969	0.957	1
Adgrb3	9.97628e-05	0.465376	0.988	0.97	1
Rnf138	0.000102399	0.382082	0.375	0.194	1
Stk39	0.00010469	0.323178	0.288	0.134	1
Rims2	0.000109024	0.390926	0.925	0.931	1
Sorcs1	0.000109117	0.459022	0.956	0.948	1
Xkr4	0.00011104	0.301839	0.969	0.97	1
Slc25a27	0.000112376	0.303273	0.356	0.181	1
Rpl29	0.000121023	-0.483056	0.206	0.371	1
Trpc1	0.000130595	0.297481	0.275	0.129	1
Araf	0.000140703	0.301588	0.444	0.254	1
Macrod2	0.000148454	0.512113	0.969	0.974	1
Cntn6	0.000149063	0.316031	0.394	0.224	1
Pcdh11x	0.000153765	0.326503	0.863	0.802	1
Slc12a2	0.000170245	0.493618	0.475	0.302	1
Zbtb38	0.000182987	0.31366	0.394	0.211	1
Cdh10	0.000184909	0.34498	0.931	0.922	1
9330159F19Rik	0.00018591	0.292384	0.35	0.185	1
Prickle2	0.000207067	0.375999	0.975	0.948	1
Atp9a	0.00021473	0.252425	0.637	0.474	1
Prkd1	0.000216501	0.304727	0.406	0.241	1
Acaca	0.000223821	0.500816	0.575	0.431	1
Fam120b	0.000231962	0.331782	0.431	0.25	1
Epn2	0.000232279	0.343954	0.556	0.371	1
Pcdh15	0.00024231	0.556575	0.35	0.194	1
Rbl2	0.000246563	0.28594	0.294	0.138	1
Dmd	0.00025709	0.417046	0.956	0.957	1
Daam1	0.000274772	0.30401	0.412	0.233	1
Vwa8	0.000295591	0.301333	0.425	0.25	1
Ank	0.000320098	0.290243	0.562	0.379	1
Mnat1	0.000323399	0.288394	0.375	0.207	1
Atrn	0.00032383	0.35385	0.65	0.534	1
Srgap2	0.000327501	-0.302717	0.994	1	1
B3galt1	0.000338083	0.368817	0.969	0.987	1
Ifngr1	0.000340867	-0.390812	0.319	0.478	1
Ncam1	0.000352292	0.282729	1	0.987	1
Arhgap22	0.000362186	-0.357782	0.4	0.547	1
Mapt	0.000370681	0.252351	0.95	0.961	1
Ctsd	0.000403151	-0.46152	0.688	0.759	1
Cdr1os	0.000407592	0.362613	0.881	0.909	1
Jakmip3	0.000412511	0.312798	0.275	0.138	1
Dennd1a	0.000416609	0.254743	0.975	0.97	1
Flnb	0.000436109	0.304727	0.3	0.155	1
Rab28	0.000436148	0.306103	0.338	0.177	1
Dgki	0.000437777	0.35757	0.988	0.974	1
Camkmt	0.00043806	0.273694	0.606	0.44	1
Rora	0.000444587	0.379495	0.95	0.961	1
Rpl14	0.00044939	-0.397713	0.238	0.392	1
Gabrb1	0.000464123	0.346481	0.9	0.892	1
Dip2a	0.000466893	0.323749	0.256	0.121	1
Tenm2	0.000470289	0.507326	0.931	0.935	1
Grm7	0.000472556	0.477159	0.975	0.957	1
Stam2	0.000474432	0.26812	0.3	0.151	1
Gm20754	0.00048554	0.33799	0.469	0.328	1
Myef2	0.000485608	0.290074	0.594	0.444	1
Amph	0.000486613	0.314949	0.594	0.461	1
D7Ertd443e	0.000486646	0.520067	0.35	0.211	1
Neo1	0.000489931	0.335588	0.569	0.414	1
Phldb1	0.000522158	0.295045	0.25	0.112	1
Ube2e2	0.000527864	0.279305	0.981	0.978	1
BC052040	0.000541389	0.272053	0.288	0.142	1
Pgap2	0.000582052	0.251238	0.3	0.147	1
Fam222b	0.000596313	0.289331	0.288	0.147	1
Rufy2	0.000601422	0.29094	0.506	0.332	1
Ccnd3	0.000629457	-0.344894	0.344	0.522	1
Baz2b	0.000654355	0.337106	0.981	0.978	1
Xrn1	0.000661706	0.291878	0.65	0.448	1
Rps15	0.000677957	-0.367329	0.269	0.418	1
Dtd1	0.000708167	0.283811	0.281	0.142	1
Elp4	0.000709509	0.309777	0.481	0.302	1
Fam135a	0.000711016	0.252453	0.338	0.181	1
Timm9	0.000731847	0.282669	0.306	0.159	1
Gpr34	0.00076166	-0.316817	0.781	0.853	1
Ankib1	0.000764948	0.270201	0.6	0.409	1
Phlpp1	0.000772269	0.393423	0.956	0.935	1
Lrrtm4	0.000786135	0.539898	0.956	0.944	1
Kif21a	0.000794703	0.278767	0.963	0.94	1
Dnm3	0.00079577	0.458156	0.994	0.991	1
Lin52	0.000806683	0.258372	0.288	0.142	1
Ralgapb	0.000811039	0.311446	0.362	0.211	1
Trip4	0.000853891	0.273996	0.281	0.142	1
Stxbp6	0.000915098	0.316962	0.25	0.125	1
Rian	0.000932298	0.386306	0.881	0.914	1
0610040J01Rik	0.000932885	-0.357605	0.569	0.672	1
Tacc1	0.000963159	-0.311652	0.863	0.931	1
Rps6ka1	0.00102677	-0.368667	0.331	0.466	1
Exoc3	0.00104267	0.38133	0.381	0.237	1
Snhg11	0.00107862	0.429138	0.988	0.97	1
Tgfbr1	0.00112741	-0.290713	0.963	0.974	1
Tmeff2	0.00118515	0.564676	0.956	0.983	1
Chuk	0.00120626	0.327654	0.388	0.246	1
Pkia	0.00120762	0.261659	0.381	0.233	1
Unc5c	0.00124844	0.427491	0.963	0.94	1
Erbb4	0.00129618	0.610154	0.925	0.927	1
Slco2b1	0.00130919	-0.338711	0.637	0.733	1
Itm2b	0.0013227	-0.30277	0.963	0.996	1
Rnf25	0.0013384	0.288743	0.275	0.147	1
Grik2	0.00138107	0.279244	1	0.991	1
Ndufa13	0.00138217	-0.387664	0.262	0.384	1
Csf1r	0.0013931	-0.35435	0.812	0.901	1
Uqcr11	0.00153882	-0.335791	0.144	0.267	1
Capza2	0.00154782	-0.340565	0.475	0.595	1
Csmd2	0.00156519	0.296865	0.588	0.478	1
Nudt3	0.00157974	-0.299233	0.131	0.254	1
Metap1d	0.00158415	0.374372	0.388	0.237	1
Abhd18	0.00161531	0.255347	0.45	0.293	1
Cnrip1	0.00164591	0.27681	0.281	0.147	1
Sft2d1	0.0016738	-0.369555	0.456	0.539	1
Zfp280c	0.0016992	0.310551	0.512	0.358	1
Stk3	0.00170683	0.321766	0.419	0.259	1
Uty	0.00171216	0.266355	0.606	0.427	1
Snhg14	0.00174775	0.28539	0.906	0.935	1
Frmd5	0.00178485	0.359255	0.963	0.97	1
Trem2	0.00183119	-0.33817	0.662	0.772	1
Arpp21	0.00187877	-0.33174	0.912	0.996	1
Fmnl2	0.00204719	0.390921	0.55	0.397	1
Sh3bgrl3	0.002117	-0.401483	0.25	0.362	1
Ppia	0.00211994	-0.26773	0.981	0.987	1
Enpp2	0.00212678	0.617517	0.544	0.422	1
Ldah	0.00219253	0.291484	0.262	0.138	1
Psmd14	0.00233914	0.255401	0.494	0.336	1
Cadps	0.00237764	0.280138	0.912	0.953	1
Dcc	0.002415	0.475314	0.969	0.961	1
Cwc27	0.00249847	0.270708	0.438	0.28	1
Sesn3	0.00253376	0.283866	0.438	0.302	1
Scn3a	0.00254423	0.258389	0.488	0.353	1
Prr5l	0.00255548	0.695155	0.319	0.198	1
Rgs2	0.00256571	-0.328133	0.319	0.44	1
Cx3cr1	0.00257595	-0.294022	0.85	0.871	1
Aif1	0.00266544	-0.41148	0.244	0.353	1
Arhgap23	0.00268152	0.400221	0.288	0.164	1
Pnp	0.00268214	-0.254183	0.169	0.302	1
Gm28376	0.00275267	0.295883	0.35	0.224	1
Gng10	0.00275705	-0.329405	0.219	0.345	1
Gnai1	0.00277945	0.27765	0.275	0.151	1
Sub1	0.00284441	-0.312669	0.219	0.349	1
Cd81	0.0028472	-0.361788	0.869	0.918	1
Snrnp48	0.00287582	0.273745	0.5	0.345	1
Rnase4	0.00292152	-0.378353	0.231	0.341	1
Rplp1	0.00294435	-0.418022	0.519	0.599	1
Cntn1	0.00298883	0.261127	0.906	0.918	1
Cdk14	0.0030709	0.291634	0.519	0.362	1
Nrxn1	0.00309788	0.537416	0.963	0.961	1
Ctsh	0.00313115	-0.355241	0.462	0.565	1
Scfd2	0.00317564	0.276886	0.256	0.138	1
Nav1	0.00330765	0.266091	0.331	0.198	1
Ppm1b	0.00337161	0.261358	0.319	0.19	1
Selenop	0.00338134	-0.302273	0.412	0.539	1
Copg2	0.00339023	0.264038	0.512	0.349	1
Galnt13	0.00343558	0.334306	0.906	0.922	1
Usp37	0.00349048	0.289012	0.288	0.168	1
Pum2	0.00349607	0.285245	0.594	0.431	1
Rcsd1	0.00349981	-0.254961	0.25	0.379	1
Mgat4c	0.00351128	0.41587	0.869	0.892	1
Cdh2	0.00351262	0.26181	0.875	0.866	1
Ndufa7	0.00353583	-0.389947	0.175	0.28	1
Npas3	0.00356752	0.536053	0.625	0.534	1
Zfp266	0.0036231	0.274756	0.35	0.216	1
Rpl37	0.00363022	-0.41168	0.3	0.427	1
Myo6	0.0036883	0.348426	0.362	0.237	1
Arap2	0.00372419	0.383547	0.294	0.177	1
Hspa8	0.00379485	-0.25529	0.875	0.944	1
Mog	0.00386442	0.361938	0.288	0.164	1
Rps7	0.00392302	-0.329361	0.238	0.362	1
Negr1	0.0039303	0.342566	0.963	0.957	1
Upp2	0.00395975	0.280894	0.819	0.763	1
Exoc4	0.00403101	0.333502	0.975	0.991	1
Glcci1	0.00407498	0.254282	0.312	0.19	1
Hpca	0.00413637	-0.345303	0.188	0.297	1
A830008E24Rik	0.00443514	0.38446	0.419	0.284	1
2610035D17Rik	0.00453792	0.309187	0.312	0.194	1
Rps3	0.00466242	-0.296367	0.312	0.44	1
Olfml3	0.00480772	-0.403662	0.331	0.453	1
Rngtt	0.00502727	0.271553	0.462	0.319	1
Zfp385b	0.00512169	0.288297	0.875	0.897	1
Smchd1	0.00535527	0.271617	0.469	0.315	1
Cul5	0.00536869	0.26405	0.394	0.263	1
Kif1b	0.00545817	0.263613	0.981	0.987	1
Spi1	0.00548389	-0.310351	0.444	0.526	1
Ppp2r2b	0.00551423	0.296819	0.869	0.897	1
Sox2ot	0.00557888	0.511314	0.906	0.927	1
Il10ra	0.00559224	-0.29482	0.481	0.591	1
Glul	0.00560038	-0.386245	0.338	0.435	1
Rpl15	0.00570627	-0.29588	0.319	0.435	1
Mrps33	0.00571147	-0.282707	0.194	0.302	1
Rps29	0.00580621	-0.329343	0.444	0.56	1
Psap	0.00582005	-0.279088	0.887	0.909	1
Clasp1	0.0058457	0.278807	0.481	0.345	1
Rpl21	0.00607839	-0.360518	0.412	0.517	1
Dynll1	0.00641181	-0.425314	0.288	0.397	1
Opcml	0.00645784	0.330917	0.944	0.978	1
Naaladl2	0.0065463	0.511907	0.863	0.871	1
Vps41	0.00659886	0.279818	0.469	0.341	1
Lrmda	0.0066713	0.33797	0.931	0.841	1
Pmepa1	0.00681538	-0.378296	0.544	0.595	1
Limch1	0.00684045	0.266268	0.95	0.953	1
Kdm6a	0.00696531	0.278999	0.338	0.22	1
Chka	0.00708842	0.261614	0.581	0.47	1
Htr2c	0.00714102	0.439377	0.756	0.741	1
Thrap3	0.00737058	0.258895	0.362	0.237	1
Dscaml1	0.00740038	0.313147	0.794	0.746	1
Dgkz	0.00745169	-0.337155	0.162	0.267	1
Clic1	0.00750242	-0.296448	0.3	0.414	1
Tra2a	0.00750243	0.268665	0.994	0.97	1
Grn	0.00751915	-0.28169	0.312	0.418	1
Rpl18a	0.00759155	-0.413321	0.344	0.44	1
Nbea	0.00781009	0.25693	0.988	0.996	1
Soga1	0.00800413	-0.268755	0.45	0.573	1
Zfp609	0.00801782	0.257979	0.488	0.353	1
Slc24a2	0.0080781	0.510328	0.963	0.983	1
Map4	0.00824717	0.264683	0.85	0.763	1
Atp1a1	0.00831952	-0.250643	0.175	0.28	1
Grip1	0.0085297	0.275372	0.869	0.875	1
Epha6	0.00906569	0.351095	0.856	0.905	1
Dock9	0.00915555	0.342901	0.488	0.362	1
Nrxn3	0.009244	0.48146	0.981	0.974	1
Cdk5rap2	0.00930897	0.252044	0.25	0.147	1
Cyba	0.00939834	-0.383585	0.412	0.513	1
Adipor2	0.00942835	0.251708	0.338	0.22	1
Plcl2	0.00957068	-0.305614	0.95	0.97	1
Actb	0.00975821	-0.300448	0.956	0.983	1
Tmem176b	0.00994319	-0.279241	0.206	0.315	1
Prpf40a	0.0102153	0.288743	0.556	0.431	1
Gm49797	0.0102503	0.253044	0.312	0.203	1
Ptpn18	0.0104025	-0.26845	0.194	0.302	1
Gm47283	0.0105938	0.275616	0.906	0.931	1
A230057D06Rik	0.0106464	0.283287	0.894	0.905	1
Lpar6	0.010693	-0.289489	0.306	0.414	1
Znrf3	0.0107836	0.264248	0.256	0.155	1
Kirrel3	0.0108356	0.257182	0.956	0.957	1
Sesn1	0.0108894	-0.32461	0.438	0.53	1
Tmcc1	0.0109108	0.266944	0.994	0.991	1
Rps27a	0.010966	-0.300866	0.288	0.392	1
Cdh11	0.0111208	0.252599	0.55	0.448	1
Rars2	0.0116505	0.25226	0.325	0.216	1
Fgf14	0.011798	0.484664	0.969	0.957	1
Kcnq3	0.0124862	0.269324	0.969	0.97	1
Ppp1r1b	0.0127406	-0.299909	0.194	0.293	1
Gpcpd1	0.0128273	0.254345	0.537	0.397	1
Fam155a	0.0129257	0.46696	0.844	0.892	1
Rpl28	0.0131216	-0.357391	0.456	0.509	1
Ctnna3	0.0131835	0.297031	0.963	0.991	1
Zfp532	0.0132477	0.270745	0.419	0.306	1
Sel1l	0.0133834	0.252438	0.356	0.237	1
9530059O14Rik	0.0137053	0.367214	0.869	0.909	1
Smap2	0.0137111	-0.284928	0.769	0.806	1
Tsc22d4	0.0137587	-0.298826	0.525	0.573	1
Lrrc4	0.0137846	0.256216	0.4	0.276	1
Lingo2	0.01494	0.689802	0.825	0.879	1
Spata5	0.015347	0.286775	0.325	0.224	1
Tasor	0.0161508	0.269315	0.55	0.44	1
Rps25	0.0164073	-0.361735	0.206	0.289	1
Rps19	0.0168408	-0.266347	0.269	0.375	1
Myo1d	0.0180816	0.28618	0.344	0.228	1
Gm26871	0.0181269	0.298585	0.85	0.871	1
Ppfia2	0.0182593	0.287232	0.869	0.914	1
Tcf12	0.0184295	0.259272	0.988	0.991	1
Dgkb	0.0187146	0.333522	0.95	0.953	1
Mt1	0.0189986	-0.250289	0.244	0.341	1
Cd14	0.019286	-0.284723	0.2	0.289	1
Cntnap2	0.0197753	0.371559	0.925	0.953	1
Atf2	0.019882	0.258145	0.7	0.625	1
Kcnq5	0.0200219	0.286533	0.931	0.94	1
Basp1	0.0201386	-0.260268	0.744	0.784	1
Rps2	0.0202395	-0.332336	0.375	0.453	1
Nbas	0.0203628	0.282047	0.6	0.491	1
Laptm5	0.0211069	-0.292835	0.55	0.608	1
Snx20	0.0211745	-0.265401	0.181	0.267	1
Nme2	0.021798	-0.26816	0.169	0.25	1
Rgs10	0.0219459	-0.308029	0.581	0.647	1
Adap2os	0.0228007	-0.315371	0.525	0.578	1
Rpl35a	0.0230468	-0.288248	0.331	0.409	1
Syn3	0.02311	0.251485	0.444	0.358	1
Ubr1	0.0235671	0.258856	0.412	0.306	1
Fth1	0.0236964	-0.37227	0.944	0.983	1
St18	0.0247239	0.796983	0.775	0.776	1
Ntm	0.0253411	0.345348	0.919	0.927	1
Gria2	0.0262035	0.273792	0.963	0.957	1
Plcb1	0.0278275	0.276324	0.95	0.948	1
Rps5	0.0292286	-0.294373	0.288	0.379	1
Fcrls	0.0296562	-0.289449	0.519	0.595	1
Arhgap39	0.0297946	-0.255899	0.544	0.634	1
Asic2	0.0299346	0.303805	0.869	0.888	1
Srsf9	0.0306907	-0.262313	0.175	0.259	1
Meg3	0.0314382	0.683483	0.988	0.987	1
Fermt3	0.03421	-0.270622	0.425	0.491	1
Cdh18	0.0342368	0.339484	0.819	0.871	1
Rps8	0.0344183	-0.250917	0.713	0.767	1
Ipo7	0.0344673	-0.256434	0.194	0.267	1
Kcnip4	0.0350665	0.433071	0.963	0.961	1
Tcf4	0.0357368	0.264886	0.944	0.97	1
Zfp36l1	0.0357601	-0.274123	0.212	0.284	1
Rac1	0.0381967	-0.292307	0.356	0.409	1
5730522E02Rik	0.0389195	0.329166	0.85	0.897	1
Homer1	0.0390761	-0.265085	0.7	0.759	1
Arpp19	0.0401044	-0.283554	0.388	0.453	1
Lrrc7	0.0402116	0.432511	0.938	0.966	1
Rpl11	0.0411489	-0.263833	0.419	0.5	1
Cd9	0.0427333	-0.3357	0.6	0.647	1
Fcgr3	0.0444736	-0.266782	0.356	0.422	1
Pcdh7	0.0447392	0.274027	0.887	0.905	1
Rpl17	0.0453554	-0.252715	0.331	0.405	1
P2rx7	0.0461491	-0.38822	0.35	0.418	1
Kcnd2	0.0463869	0.33117	0.95	0.966	1
Lars2	0.04713	-0.252726	0.3	0.384	1
Dapp1	0.0473049	-0.278823	0.494	0.547	1
St3gal6	0.0496024	-0.255178	0.738	0.78	1
Fau	0.0525336	-0.351014	0.675	0.651	1
Rpl27a	0.0551506	-0.297743	0.55	0.578	1
Edil3	0.0562937	0.427119	0.931	0.948	1
Rbfox1	0.0605595	0.443617	0.981	0.996	1
Rab8b	0.0605833	-0.265796	0.406	0.47	1
St6galnac3	0.0614007	0.294813	0.9	0.892	1
Rpl19	0.0669092	-0.300796	0.481	0.522	1
Rnf220	0.0710863	0.317081	0.762	0.746	1
Robo2	0.0737762	0.434651	0.9	0.927	1
Mast4	0.0784153	0.25303	0.887	0.909	1
Junb	0.0792857	-0.256386	0.288	0.353	1
Ssr4	0.0799358	-0.260075	0.294	0.345	1
Cox6c	0.0808587	-0.302403	0.219	0.284	1
Dab1	0.0857249	0.255945	0.919	0.935	1
Gabrg3	0.0953571	0.382879	0.887	0.927	1
Ssb	0.0980851	-0.293277	0.281	0.332	1
Pde4b	0.102685	0.707608	0.981	1	1
Pts	0.109243	-0.254183	0.231	0.28	1
Ftl1	0.115251	-0.251218	0.412	0.466	1
Ubc	0.129863	-0.286661	0.431	0.457	1
Gria1	0.133823	0.261463	0.875	0.953	1
Rps13	0.138136	-0.2875	0.381	0.422	1
Gm15155	0.168169	0.270025	0.594	0.56	1
Pde10a	0.177738	-0.281433	0.906	0.97	1
Galntl6	0.182992	0.310201	0.894	0.922	1
Hs6st3	0.184862	0.278412	0.887	0.909	1
Dbi	0.199892	-0.318608	0.219	0.263	1
Lhfpl3	0.205237	0.409653	0.812	0.866	1
Lrfn5	0.213092	0.363621	0.875	0.922	1
Sntg1	0.227523	0.314413	0.875	0.922	1
Cd68	0.233979	-0.273725	0.281	0.31	1
Nrg3	0.263088	0.338542	0.906	0.927	1
Grm5	0.26928	0.252212	0.919	0.957	1
Nrg1	0.320076	0.396328	0.944	0.966	1
Ptgds	0.579326	-0.777188	0.706	0.75	1
Cntnap5a	0.588903	0.251214	0.787	0.871	1
Mbp	0.815293	0.365819	0.881	0.931	1

[truncated: 6 more sheets: thiamine_cluster9R61vvsNTv, thiamine_cluster10R61vvsNTv, thiamine_cluster11R61vvsNTv, thiamine_cluster12R61vvsNTv, thiamine_cluster13R61vvsNTv, Sheet1]
