# Supplementary material for: Huntington disease oligodendrocyte maturation deficits revealed by single-nucleus RNAseq are rescued by thiamine-biotin supplementation
Source: Nat Commun. 2022 Dec 21;13:7791. doi: 10.1038/s41467-022-35388-x (PMC9772349; doi:10.1038/s41467-022-35388-x)
Supplement: Supplementary file 13 — Supplementary Dataset 11 [file 41467_2022_35388_MOESM13_ESM.xlsx]

## Sheet: Cluster Annotation
Cluster	Cell type
0	D1+MSN1
1	ODC1
2	D2+
3	ODC2
4	Inhib1
5	Astro
6	Inhib2
7	OPC
8	MG
9	Ex1
10	Ex2
11	Inhib3
12	Vascular
13	Cholin

## Sheet: thiamine_cluster0R61thiaminevsV
Column1	p_val	avg_log2FC	pct.1	pct.2	p_val_adj
AC149090.1	7.4997e-216	-0.773986	0.85	0.964	1.90725e-211
Atp6v0c	5.08854e-54	0.395774	0.948	0.907	1.29407e-49
Tac1	7.12866e-54	0.446928	0.949	0.917	1.81289e-49
Nrgn	4.25239e-36	0.358886	0.835	0.742	1.08143e-31
Ppia	1.12735e-35	0.351381	0.909	0.857	2.86696e-31
Pcp4	1.6282e-34	0.325963	0.868	0.778	4.14068e-30
Pcsk1n	3.90047e-34	0.348231	0.907	0.857	9.91929e-30
Bsg	4.24026e-34	0.280858	0.717	0.578	1.07834e-29
Ubb	2.57546e-30	0.304808	0.944	0.9	6.54965e-26
Ckb	1.33791e-29	0.284954	0.922	0.87	3.40245e-25
Gapdh	3.52525e-29	0.297917	0.892	0.853	8.96506e-25
Tmem158	6.47425e-29	0.277986	0.816	0.723	1.64647e-24
Aldoa	2.3899e-28	0.27745	0.852	0.785	6.07775e-24
Gm47283	2.57894e-27	-0.307952	0.801	0.873	6.5585e-23
Cst3	1.43462e-25	0.2787	0.735	0.631	3.64838e-21
Caly	2.1782e-25	0.273849	0.796	0.715	5.53938e-21
Itm2b	5.62246e-25	0.269458	0.831	0.753	1.42985e-20
Cadm1	1.35666e-22	-0.32273	0.794	0.858	3.45012e-18
Chchd10	1.5165e-20	0.255414	0.7	0.613	3.85662e-16
Prkg1	2.4974e-18	-0.414113	0.571	0.653	6.35113e-14
Pdzrn4	1.07772e-17	-0.299291	0.505	0.61	2.74074e-13
March1	6.80597e-15	-0.363863	0.317	0.413	1.73083e-10
Kctd8	2.79124e-12	-0.250899	0.772	0.812	7.09839e-08
Gm32647	9.09034e-12	-0.323007	0.559	0.632	2.31177e-07
Dpp10	1.98507e-09	-0.327354	0.854	0.873	5.04823e-05
Schip1	2.9091e-09	-0.28832	0.722	0.761	7.39814e-05
Pde1a	1.28269e-05	-0.2852	0.339	0.391	0.326202
Pde4d	8.49324e-05	-0.292377	0.426	0.472	1

## Sheet: thiamine_cluster1R61thiaminevsV
Column1	p_val	avg_log2FC	pct.1	pct.2	p_val_adj
Fth1	3.54703e-28	0.526519	1	0.997	9.02045e-24
Cryab	7.29367e-28	0.680312	0.878	0.788	1.85485e-23
Gstp1	7.82816e-26	0.610375	0.623	0.447	1.99078e-21
Ptgds	1.96485e-24	0.768536	0.914	0.863	4.9968e-20
Plp1	3.25176e-23	0.263271	1	1	8.26955e-19
Stmn1	4.51468e-23	0.457788	0.815	0.673	1.14813e-18
Itm2b	7.68761e-23	0.382334	0.989	0.979	1.95504e-18
Trf	3.65263e-22	0.376769	0.996	0.985	9.28899e-18
Car2	6.88276e-22	0.371137	0.973	0.945	1.75036e-17
Ppia	2.60548e-21	0.402218	0.99	0.983	6.62599e-17
Tuba1a	3.64641e-21	0.417413	0.925	0.887	9.2732e-17
7630403G23Rik	6.01002e-20	-0.549817	0.252	0.437	1.52841e-15
Aplp1	5.97534e-19	0.340463	0.998	0.988	1.51959e-14
Apod	1.57846e-18	0.4573	0.99	0.973	4.01419e-14
Actb	2.65791e-17	0.338526	0.999	0.995	6.75932e-13
Dbndd2	1.29653e-15	0.339307	0.879	0.814	3.29721e-11
Pllp	1.73843e-15	0.359435	0.733	0.602	4.42101e-11
AC149090.1	4.20941e-15	-0.271827	0.958	0.977	1.07049e-10
Lama2	1.03959e-14	-0.449675	0.322	0.469	2.64378e-10
Ppp1r14a	2.23262e-14	0.341443	0.788	0.663	5.67779e-10
Slc8a3	2.7264e-14	-0.37846	0.25	0.401	6.93352e-10
Csrp1	9.27367e-14	0.315532	0.81	0.702	2.35839e-09
Stmn4	9.6405e-14	0.297137	0.871	0.801	2.45168e-09
B3galt1	3.71306e-13	-0.260303	0.998	0.999	9.44269e-09
Crppa	1.15067e-12	-0.351412	0.383	0.522	2.92628e-08
Nkx6-2	2.89632e-12	0.320277	0.45	0.301	7.36562e-08
Neat1	3.37353e-12	0.264473	0.96	0.935	8.57921e-08
Prickle2	4.78754e-12	-0.262378	0.996	0.997	1.21752e-07
Evi2a	5.08631e-12	0.313636	0.624	0.502	1.2935e-07
Rhog	5.39137e-12	0.33549	0.457	0.324	1.37108e-07
9330111N05Rik	1.23359e-11	-0.586143	0.288	0.423	3.13713e-07
Sec11c	1.53007e-11	0.302665	0.735	0.646	3.89113e-07
Pex5l	1.74091e-11	-0.309693	0.99	0.986	4.42731e-07
Auts2	2.27832e-11	-0.268694	1	1	5.79399e-07
Cldn11	3.06946e-11	0.281891	0.895	0.835	7.80595e-07
Ckb	3.16797e-11	0.280331	0.995	0.991	8.05646e-07
Kirrel3	6.46348e-11	-0.56796	0.968	0.977	1.64373e-06
Gjb1	1.01627e-10	0.306999	0.443	0.316	2.58447e-06
Rps5	1.35895e-10	0.33278	0.483	0.357	3.45594e-06
Scd2	2.44062e-10	0.251584	0.989	0.981	6.20675e-06
Grm7	2.64343e-10	-0.365931	0.976	0.984	6.7225e-06
2810468N07Rik	2.88083e-10	0.271423	0.468	0.34	7.32624e-06
Mal	3.11332e-10	0.258094	0.958	0.928	7.91748e-06
Rpl18	3.49488e-10	0.316485	0.497	0.37	8.88782e-06
Apoe	7.51893e-10	0.348947	0.921	0.879	1.91214e-05
Qdpr	1.00186e-09	0.306673	0.775	0.672	2.54783e-05
Pakap	1.15081e-09	-0.341437	0.62	0.715	2.92664e-05
Cfl1	1.96302e-09	0.269354	0.595	0.47	4.99216e-05
Cd81	1.97738e-09	0.263756	0.908	0.873	5.02868e-05
Gng11	4.04717e-09	0.303369	0.527	0.404	0.000102924
Olig1	4.22555e-09	0.266826	0.596	0.482	0.00010746
Mid1ip1	7.53756e-09	0.254631	0.3	0.194	0.000191688
Rps3	8.25636e-09	0.271508	0.473	0.361	0.000209968
Fez1	9.42764e-09	0.251445	0.767	0.693	0.000239754
Fabp5	1.56468e-08	0.304069	0.42	0.308	0.000397913
Phgdh	1.68135e-08	0.255432	0.41	0.299	0.000427584
Cnp	2.03202e-08	0.259111	0.899	0.836	0.000516762
Rhob	2.80433e-08	0.259326	0.513	0.4	0.000713169
Rpsa	2.8378e-08	0.302115	0.508	0.41	0.000721682
Ubc	5.3993e-08	0.251151	0.676	0.609	0.0013731
Gria4	1.01257e-07	-0.259708	0.977	0.986	0.00257507
4930420G21Rik	1.27786e-06	-0.276277	0.575	0.641	0.0324971
Rpl24	1.40119e-06	0.274369	0.489	0.397	0.0356337
Taldo1	1.60465e-06	0.253236	0.62	0.549	0.0408079
Mt1	3.24192e-06	0.256668	0.436	0.344	0.0824453
Tmtc2	3.33048e-06	-0.256288	0.59	0.675	0.0846975
Rnasek	3.42619e-06	0.257473	0.528	0.451	0.0871315
Prickle1	4.22641e-06	-0.28506	0.882	0.906	0.107482
Acyp2	6.1657e-06	-0.260453	0.451	0.526	0.1568
Synpr	0.00027604	-0.296962	0.288	0.356	1

## Sheet: thiamine_cluster2R61thiaminevsV
Column1	p_val	avg_log2FC	pct.1	pct.2	p_val_adj
AC149090.1	1.97587e-171	-0.778009	0.827	0.964	5.02483e-167
Malat1	5.20775e-122	0.272052	1	1	1.32438e-117
Nrgn	3.67937e-49	0.423439	0.933	0.841	9.35701e-45
Atp6v0c	3.13592e-45	0.402335	0.953	0.918	7.97495e-41
Chchd10	3.94863e-36	0.387313	0.766	0.621	1.00418e-31
Gm47283	2.78235e-35	-0.378847	0.808	0.889	7.0758e-31
Pcsk1n	3.35044e-32	0.348246	0.917	0.854	8.5205e-28
Gapdh	1.37942e-31	0.341639	0.899	0.872	3.50802e-27
Ckb	7.61365e-30	0.30851	0.952	0.923	1.93623e-25
Bsg	1.00665e-29	0.313793	0.715	0.589	2.56002e-25
Ppia	2.98938e-26	0.311082	0.903	0.863	7.6023e-22
Pcp4	3.35758e-24	0.31702	0.761	0.647	8.53867e-20
Aldoa	3.68866e-24	0.285677	0.857	0.779	9.38063e-20
Mdh1	6.86743e-24	0.281413	0.845	0.777	1.74646e-19
Stmn3	2.15313e-22	0.277722	0.839	0.769	5.47562e-18
Ndufa4	2.8784e-21	0.282375	0.708	0.602	7.32007e-17
Tenm2	2.40104e-20	-0.255467	0.982	0.993	6.1061e-16
March1	3.03702e-20	-0.498474	0.574	0.67	7.72343e-16
Cst3	4.46277e-20	0.29921	0.724	0.632	1.13493e-15
Ubb	5.32624e-20	0.268747	0.934	0.913	1.35452e-15
Gabrb1	9.54648e-20	-0.268373	0.927	0.958	2.42777e-15
Pde4d	2.7559e-19	-0.396964	0.653	0.735	7.00852e-15
Gm32647	4.2696e-19	-0.486894	0.513	0.615	1.0858e-14
Cadm1	6.68548e-19	-0.3379	0.685	0.771	1.70018e-14
Pdzrn4	4.90206e-17	-0.371221	0.369	0.484	1.24664e-12
Prkg1	5.05045e-17	-0.58725	0.367	0.475	1.28438e-12
Asic2	2.69892e-16	-0.25324	0.919	0.949	6.86363e-12
C130073E24Rik	1.09301e-15	-0.338149	0.366	0.484	2.77964e-11
Unc5d	4.63794e-15	-0.456816	0.66	0.731	1.17947e-10
Dpp10	5.11668e-15	-0.355976	0.877	0.918	1.30122e-10
Kctd8	3.77193e-14	-0.261454	0.785	0.847	9.59238e-10
Schip1	1.0597e-13	-0.424166	0.556	0.639	2.69492e-09
Tenm3	3.1745e-13	-0.250263	0.876	0.912	8.07307e-09
Slc8a1	3.52007e-13	-0.332512	0.201	0.294	8.95189e-09
Khdrbs2	9.82092e-12	-0.305441	0.613	0.687	2.49756e-07
Pde1a	1.00267e-08	-0.323894	0.298	0.374	0.000254988
Slit2	1.65986e-07	-0.264718	0.293	0.36	0.00422119
Htr1f	0.00051256	-0.254436	0.36	0.405	1

## Sheet: thiamine_cluster3R61thiaminevsV
Column1	p_val	avg_log2FC	pct.1	pct.2	p_val_adj
AC149090.1	6.23073e-38	-0.421249	0.94	0.979	1.58454e-33
Apod	4.39476e-34	0.484052	0.992	0.986	1.11763e-29
Fth1	7.08043e-30	0.466386	0.994	0.991	1.80062e-25
Ppia	2.4408e-26	0.380903	0.986	0.981	6.20721e-22
Aplp1	6.15947e-25	0.366218	0.991	0.97	1.56641e-20
Itm2b	7.57923e-24	0.346875	0.986	0.968	1.92747e-19
Cryab	3.80368e-23	0.44861	0.786	0.669	9.67314e-19
Tuba1a	3.03322e-22	0.385173	0.914	0.868	7.71379e-18
AY036118	5.31855e-22	-0.278734	0.998	0.999	1.35256e-17
Gstp1	9.52223e-22	0.387088	0.464	0.3	2.4216e-17
Ppp1r14a	9.87137e-21	0.347893	0.77	0.648	2.51039e-16
Dbndd2	3.42667e-19	0.30838	0.863	0.772	8.71436e-15
Actb	3.33628e-17	0.299389	0.993	0.988	8.48449e-13
Tecr	1.73814e-16	0.287112	0.884	0.83	4.42027e-12
Eef1a1	4.63587e-16	0.255321	0.933	0.905	1.17895e-11
Gapdh	1.04517e-15	0.262884	0.975	0.962	2.65797e-11
Cd81	1.74882e-15	0.297925	0.819	0.741	4.44742e-11
Rpl28	7.98275e-15	0.291105	0.572	0.449	2.03009e-10
Ubb	2.2184e-14	0.251555	0.991	0.983	5.64162e-10
Pllp	2.21977e-14	0.300763	0.558	0.43	5.64509e-10
Stmn4	2.61591e-14	0.28196	0.802	0.724	6.65253e-10
Prdx1	1.07613e-13	0.293153	0.678	0.57	2.7367e-09
Stmn1	1.24098e-13	0.296377	0.759	0.682	3.15593e-09
Rps5	1.90649e-13	0.275212	0.46	0.33	4.84839e-09
Ptgds	2.65291e-13	0.591267	0.835	0.811	6.74661e-09
Trf	4.45867e-13	0.251407	0.986	0.973	1.13388e-08
Grm7	7.12929e-13	-0.297603	0.985	0.984	1.81305e-08
Mt1	1.11489e-12	0.279042	0.395	0.278	2.83527e-08
Rpl24	3.51236e-12	0.268693	0.507	0.391	8.93228e-08
Rpsa	3.68363e-12	0.297262	0.522	0.414	9.36784e-08
Mal	1.00534e-11	0.275233	0.808	0.749	2.55668e-07
Rpl8	5.04409e-11	0.251436	0.451	0.343	1.28276e-06
Rps8	1.29365e-10	0.276215	0.643	0.56	3.28988e-06
Dad1	1.37499e-10	0.261413	0.49	0.384	3.49675e-06
Pakap	2.33376e-10	-0.261822	0.488	0.592	5.93499e-06
Lama2	2.35065e-10	-0.32109	0.475	0.569	5.97794e-06
Neat1	7.85574e-10	0.258511	0.891	0.854	1.99779e-05
Car2	9.01555e-09	0.251639	0.802	0.742	0.000229275

## Sheet: thiamine_cluster4R61thiaminevsV
Column1	p_val	avg_log2FC	pct.1	pct.2	p_val_adj
AC149090.1	2.27126e-49	-0.769996	0.842	0.968	5.77603e-45
Cadm1	6.91374e-24	-0.717747	0.754	0.89	1.75823e-19
Lrfn5	1.34832e-17	-0.542344	0.856	0.933	3.42892e-13
Nrgn	2.84868e-17	0.514122	0.757	0.558	7.24447e-13
Baiap3	5.77514e-16	-0.487557	0.227	0.455	1.46868e-11
Pde10a	1.09455e-14	0.436747	0.929	0.851	2.78355e-10
Atp2b1	2.98475e-14	0.397034	0.962	0.927	7.59053e-10
Cadm2	7.95323e-14	0.353463	0.995	0.985	2.02259e-09
Nrp2	1.01847e-13	-0.442589	0.203	0.409	2.59006e-09
Sema5b	1.20216e-13	0.470188	0.43	0.243	3.05721e-09
Necab1	4.92551e-12	0.458691	0.676	0.513	1.25261e-07
Thy1	6.43827e-12	0.365005	0.636	0.471	1.63732e-07
Tenm2	2.52902e-11	-0.472457	0.943	0.962	6.43154e-07
March1	6.33829e-11	-0.580428	0.527	0.695	1.61189e-06
Pde4b	6.65738e-11	0.351483	0.934	0.919	1.69304e-06
Opcml	7.53898e-11	0.339725	0.981	0.974	1.91724e-06
C530008M17Rik	9.25647e-11	-0.345847	0.397	0.584	2.35401e-06
AY036118	2.14271e-10	-0.28658	0.993	0.998	5.44911e-06
A230057D06Rik	2.50734e-10	-0.305695	0.92	0.942	6.37641e-06
Gabrb1	3.5952e-10	-0.301582	0.924	0.976	9.14296e-06
Rmst	3.91527e-10	-0.574561	0.286	0.461	9.95693e-06
Mir99ahg	4.43282e-10	-0.370731	0.809	0.873	1.12731e-05
Arid5b	5.37082e-10	-0.346031	0.414	0.587	1.36585e-05
Fth1	5.65771e-10	0.372475	0.887	0.772	1.43881e-05
Negr1	6.31205e-10	-0.259538	0.993	0.999	1.60522e-05
Atp2b2	8.88706e-10	0.287481	0.924	0.851	2.26007e-05
Nlgn1	1.00024e-09	-0.358988	0.983	0.987	2.54372e-05
C1qtnf4	2.59919e-09	0.333438	0.806	0.691	6.61001e-05
Atp6v0c	3.14295e-09	0.30837	0.957	0.925	7.99284e-05
Ckb	3.96676e-09	0.310147	0.872	0.736	0.000100879
Gpr88	3.98124e-09	0.331732	0.447	0.292	0.000101247
Meis2	4.50697e-09	0.323731	0.913	0.827	0.000114617
Slc8a1	4.72825e-09	-0.4046	0.825	0.89	0.000120244
Dpp10	6.35797e-09	-0.514756	0.877	0.903	0.00016169
Tshz1	7.64502e-09	0.359946	0.626	0.46	0.00019442
Msra	8.03123e-09	0.333473	0.74	0.617	0.000204242
Prkn	8.09282e-09	-0.280235	0.917	0.95	0.000205808
Calm2	8.55945e-09	0.282189	0.96	0.909	0.000217675
Efna5	9.86753e-09	-0.504245	0.34	0.499	0.000250941
Unc5c	1.34693e-08	-0.393689	0.619	0.751	0.000342537
Auts2	1.68684e-08	0.268372	0.998	0.993	0.00042898
Unc5d	2.62866e-08	-0.440713	0.676	0.779	0.000668495
Dpyd	3.88225e-08	-0.435119	0.537	0.666	0.000987294
Sema3e	4.43349e-08	0.411154	0.44	0.301	0.00112748
C130073E24Rik	4.90695e-08	-0.440996	0.579	0.689	0.00124789
Slit2	5.29009e-08	-0.471777	0.312	0.44	0.00134532
Prkg1	5.5178e-08	-0.446799	0.586	0.726	0.00140323
Gpm6b	6.89136e-08	0.296574	0.806	0.693	0.00175254
Pcp4	7.75157e-08	0.330096	0.7	0.573	0.0019713
Trpc5	8.44313e-08	-0.32879	0.173	0.312	0.00214717
Tll1	8.75624e-08	0.260903	0.331	0.196	0.0022268
Sorl1	1.08703e-07	0.283951	0.638	0.531	0.00276443
Rasgrp1	1.25488e-07	0.25214	0.475	0.33	0.00319129
Slc2a13	1.31535e-07	0.293549	0.863	0.779	0.00334508
Spon1	1.67177e-07	0.358876	0.454	0.312	0.00425147
Inf2	1.93074e-07	0.255715	0.35	0.217	0.00491006
Tshz2	2.5345e-07	-0.276951	0.255	0.422	0.0064455
Grin2a	2.88392e-07	0.267105	0.905	0.868	0.00733411
Dner	2.89212e-07	-0.285941	0.454	0.599	0.00735495
Sorcs2	3.10225e-07	0.303718	0.6	0.468	0.00788932
Rasgrf2	3.45178e-07	-0.309087	0.246	0.374	0.00877822
Rgs7bp	3.4647e-07	0.269759	0.851	0.75	0.00881108
Cdh13	3.74203e-07	0.34299	0.747	0.612	0.00951636
Rtl4	3.74489e-07	-0.504876	0.253	0.38	0.00952363
Kcnh7	3.83431e-07	-0.399031	0.719	0.814	0.00975102
Aldoa	4.36428e-07	0.260196	0.811	0.709	0.0110988
5330434G04Rik	4.57159e-07	-0.250488	0.721	0.817	0.011626
Hap1	4.66138e-07	-0.276148	0.461	0.593	0.0118544
Pde7b	4.66359e-07	0.339595	0.764	0.682	0.01186
A330076H08Rik	4.68708e-07	-0.297065	0.735	0.79	0.0119197
Grik1	4.85519e-07	-0.582206	0.194	0.317	0.0123472
Ccdc85a	6.32e-07	-0.331498	0.522	0.639	0.0160724
Dcc	7.38737e-07	-0.352285	0.967	0.958	0.0187868
Lingo2	9.45059e-07	-0.403377	0.83	0.867	0.0240338
Foxp2	9.57098e-07	0.335866	0.785	0.675	0.02434
Gm2516	1.35039e-06	-0.321537	0.314	0.448	0.0343417
Cdh2	1.45777e-06	-0.250102	0.7	0.801	0.0370725
Cntnap2	1.48186e-06	-0.273403	1	0.994	0.0376851
Cep112	1.59675e-06	-0.439128	0.383	0.502	0.040607
Ptprd	1.80988e-06	-0.396986	0.924	0.934	0.0460269
Ppia	1.83691e-06	0.287992	0.889	0.834	0.0467146
Gm45341	1.93473e-06	-0.270662	0.173	0.288	0.0492022
Phactr1	3.55255e-06	0.325945	0.981	0.983	0.090345
Wwox	4.28135e-06	-0.322219	0.622	0.711	0.108879
Resp18	4.44018e-06	-0.293436	0.385	0.519	0.112918
Usp29	4.56796e-06	-0.258202	0.842	0.88	0.116168
Adamts3	4.64767e-06	0.2562	0.645	0.521	0.118195
Luzp2	4.72632e-06	-0.440736	0.314	0.433	0.120195
Tenm3	4.78606e-06	-0.258052	0.79	0.86	0.121714
Nxph1	5.76307e-06	-0.420249	0.222	0.348	0.146561
Sdk1	6.49696e-06	-0.412273	0.303	0.427	0.165224
Nnat	7.05629e-06	-0.391061	0.385	0.494	0.179448
Cntnap5a	7.13116e-06	-0.360092	0.667	0.758	0.181352
Pcsk2	9.34934e-06	0.328944	0.811	0.718	0.237763
Htr2c	9.38617e-06	-0.398229	0.371	0.486	0.2387
Zmat4	1.00051e-05	-0.391042	0.324	0.442	0.25444
Gulp1	1.32671e-05	-0.336343	0.288	0.401	0.337395
Tac1	1.33851e-05	0.489042	0.56	0.471	0.340396
Fstl5	1.39147e-05	-0.363161	0.307	0.425	0.353865
Glra3	1.49829e-05	-0.281863	0.17	0.277	0.38103
Gm40663	1.64947e-05	0.28596	0.291	0.188	0.419476
Rbms3	2.08454e-05	0.270008	0.849	0.804	0.53012
Brinp3	2.69681e-05	-0.32427	0.615	0.718	0.685827
Gm20754	3.67839e-05	-0.370121	0.267	0.373	0.93545
Ptprt	4.00127e-05	-0.319133	0.686	0.743	1
Tmem108	4.24869e-05	-0.292787	0.359	0.467	1
Lrrtm4	4.38513e-05	-0.313657	0.979	0.979	1
Tmem132d	4.97365e-05	-0.340726	0.291	0.394	1
Hs6st3	5.32861e-05	0.291717	0.785	0.69	1
4930555F03Rik	5.6548e-05	-0.319904	0.442	0.555	1
Crim1	6.95365e-05	-0.28127	0.288	0.388	1
Sorcs3	7.11881e-05	-0.299608	0.522	0.612	1
Dscam	7.41387e-05	-0.30018	0.719	0.763	1
Zbtb20	7.86821e-05	-0.339855	0.882	0.92	1
Ptprz1	0.0001286	-0.275811	0.496	0.586	1
Zfhx3	0.000158348	-0.353158	0.444	0.541	1
Plxdc2	0.000184251	-0.289928	0.532	0.612	1
Kirrel3	0.000283374	-0.299749	0.832	0.875	1
Mgat4c	0.000317653	-0.355304	0.816	0.83	1
Msi2	0.00042131	-0.256605	0.534	0.629	1
Klhl1	0.000608724	-0.346679	0.222	0.304	1
Tafa1	0.000694713	-0.371435	0.173	0.262	1
Cadps2	0.000788773	-0.312609	0.362	0.461	1
Fstl4	0.000877394	-0.265498	0.241	0.323	1
Kcnk2	0.0010689	0.273496	0.577	0.517	1
Kcnc2	0.00114554	-0.281408	0.671	0.702	1
Astn2	0.00120228	-0.2734	0.652	0.712	1
Prr16	0.00170054	-0.372923	0.385	0.46	1
Gm32647	0.00186257	-0.632402	0.31	0.387	1
Kctd8	0.00198315	-0.275798	0.248	0.327	1
Sorcs1	0.00201605	0.257037	0.771	0.737	1
Gm42418	0.00226688	-0.256672	1	1	1
Zfp804b	0.0117619	-0.52726	0.444	0.489	1
Pcdh11x	0.0265287	-0.310595	0.556	0.601	1
Car10	0.130192	-0.255861	0.662	0.663	1
Plp1	0.135798	0.278475	0.374	0.343	1

## Sheet: thiamine_cluster5R61thiaminevsV
Column1	p_val	avg_log2FC	pct.1	pct.2	p_val_adj
AY036118	6.93652e-14	-0.287656	0.998	1	1.76403e-09
AC149090.1	9.2719e-14	-0.346169	0.854	0.937	2.35794e-09
Ppia	5.82135e-13	0.422812	0.972	0.945	1.48043e-08
Mt1	1.00238e-11	0.462355	0.872	0.788	2.54914e-07
Fth1	3.05603e-11	0.381494	0.97	0.936	7.7718e-07
Pbx1	1.16695e-08	-0.262481	0.998	0.997	0.000296767
Gapdh	1.56213e-07	0.260105	0.965	0.929	0.00397264
Pla2g7	7.46633e-07	0.329301	0.774	0.704	0.0189876
Gm47283	1.13749e-06	-0.281418	0.596	0.693	0.0289274
Hdac9	1.55411e-06	-0.352123	0.756	0.808	0.0395226
Gm26917	1.66572e-06	-0.27892	0.463	0.566	0.042361
Cox6c	1.86577e-06	0.306213	0.51	0.384	0.0474483
Slc25a4	2.67117e-06	0.280648	0.827	0.764	0.0679304
Frmd4a	3.75157e-06	-0.331101	0.99	0.991	0.0954063
Galnt16	6.59321e-06	-0.260007	0.252	0.363	0.167672
Mt3	6.9415e-06	0.252977	0.837	0.766	0.176529
Actb	9.97265e-06	0.277506	0.955	0.94	0.253615
Nrgn	1.03431e-05	0.316517	0.764	0.7	0.263036
Alcam	1.23683e-05	-0.250121	0.917	0.943	0.314538
Ptch1	3.2927e-05	-0.280878	0.528	0.626	0.837366
Cryab	4.43834e-05	0.317712	0.262	0.17	1
Cxcl14	5.08883e-05	0.252025	0.555	0.465	1
Ptprg	5.11396e-05	-0.308519	0.467	0.547	1
Ubb	5.2358e-05	0.264712	0.972	0.967	1
Sox5	5.551e-05	-0.260838	0.751	0.807	1
Dab1	6.76736e-05	-0.250478	0.937	0.964	1
Ncam2	9.12662e-05	-0.267722	0.968	0.978	1
Mif	0.000101586	0.266633	0.53	0.437	1
Gabbr2	0.000108698	-0.304762	0.342	0.437	1
Robo1	0.000205326	-0.279287	0.912	0.936	1
Mgat4c	0.000206298	-0.292118	0.87	0.912	1
Clu	0.000224468	0.296928	0.89	0.866	1
Ptgds	0.000338426	0.533378	0.35	0.275	1
Sgcd	0.000413577	-0.318869	0.349	0.428	1
Erbb4	0.00202685	-0.334436	0.743	0.805	1
Slc7a11	0.00345714	-0.290205	0.392	0.459	1
Pbx3	0.00405388	-0.273408	0.578	0.631	1
Gria1	0.00959804	-0.297641	0.806	0.849	1
Id3	0.0151575	0.257629	0.402	0.347	1
Kcnip4	0.0233123	-0.27103	0.945	0.951	1
Tenm2	0.0338932	-0.311734	0.855	0.898	1
Dpp10	0.0435793	0.303057	0.626	0.621	1
Rbfox1	0.13677	-0.26431	0.935	0.932	1

## Sheet: thiamine_cluster6R61thiaminevsV
Column1	p_val	avg_log2FC	pct.1	pct.2	p_val_adj
AC149090.1	1.5681e-28	-0.916801	0.809	0.951	3.98784e-24
Malat1	1.06735e-14	0.297097	1	1	2.71438e-10
AY036118	1.93698e-08	-0.335038	0.993	0.996	0.000492594
Nkain3	2.49267e-08	-0.485998	0.66	0.845	0.000633911
Ncam1	3.40921e-08	-0.384897	0.929	0.981	0.000866996
Ubash3b	6.33677e-08	0.381291	0.638	0.415	0.0016115
Bsg	3.5652e-07	0.385595	0.812	0.702	0.00906665
Lsamp	4.48344e-07	-0.261242	0.996	1	0.0114018
Dusp11	5.42339e-07	-0.297723	0.486	0.679	0.0137922
Robo1	1.06644e-06	-0.328081	0.929	0.966	0.0271205
Ndufa11	1.5588e-06	0.306363	0.574	0.37	0.0396418
Cep112	1.63338e-06	-0.417727	0.518	0.698	0.0415386
Sirt3	2.51726e-06	0.283024	0.433	0.249	0.0640164
Negr1	4.88441e-06	-0.305956	0.972	0.989	0.124215
Myo16	6.05732e-06	0.404494	0.567	0.4	0.154044
Gm42418	1.22692e-05	-0.264234	1	1	0.312019
Csmd3	1.29571e-05	-0.322173	0.915	0.981	0.329512
Etv1	1.63143e-05	-0.429804	0.404	0.558	0.414888
A830082K12Rik	1.65335e-05	0.325335	0.316	0.162	0.420463
Atp8a1	1.88583e-05	-0.267774	0.794	0.853	0.479585
Pcdh7	2.73169e-05	0.540526	0.816	0.747	0.694697
Cntn5	3.23099e-05	-0.325981	0.798	0.894	0.821674
Dach2	5.8474e-05	-0.255895	0.142	0.283	1
Il1rapl2	6.38915e-05	-0.493499	0.638	0.758	1
Khdrbs3	0.000105614	0.307523	0.663	0.536	1
Tecr	0.000106513	0.252912	0.954	0.864	1
Prickle1	0.000107355	0.312079	0.773	0.653	1
Celf4	0.00015208	-0.279247	0.918	0.951	1
Sfta3-ps	0.000158336	-0.353696	0.447	0.615	1
Rgs6	0.000162696	0.621642	0.337	0.2	1
Thsd4	0.000177281	-0.289351	0.273	0.411	1
Kcnmb2	0.000198434	0.359397	0.755	0.672	1
Cntnap5b	0.000234885	-0.288201	0.621	0.774	1
Kcns3	0.000245468	0.280816	0.39	0.253	1
9630014M24Rik	0.000284398	0.303697	0.695	0.528	1
Kcnab1	0.000320587	-0.357744	0.73	0.842	1
Htr2c	0.000357008	-0.396239	0.372	0.528	1
Pvalb	0.000459353	0.349997	0.33	0.215	1
St18	0.000539233	-0.29965	0.408	0.543	1
Necab1	0.000729018	-0.306339	0.379	0.517	1
Hs6st3	0.000902989	-0.273799	0.695	0.823	1
Atp1b1	0.000935099	0.259919	0.975	0.955	1
Gm28905	0.00103065	-0.265274	0.294	0.434	1
Pcsk1n	0.00116839	0.274117	0.947	0.872	1
Pdzd2	0.00131595	0.342844	0.383	0.264	1
Brinp3	0.00154051	0.426629	0.507	0.392	1
Ndst4	0.00167919	-0.288289	0.351	0.487	1
Ghr	0.00172583	-0.317557	0.482	0.581	1
Trpc4	0.00174088	0.3008	0.301	0.189	1
Zfpm2	0.00237741	0.303273	0.532	0.404	1
Ptchd4	0.00239712	0.330301	0.706	0.645	1
Kctd16	0.00268783	0.289428	0.915	0.826	1
Tshz2	0.00281132	-0.323154	0.195	0.298	1
Zfp385b	0.00338099	0.258221	0.723	0.638	1
Thsd7a	0.0036972	-0.278886	0.738	0.804	1
Galnt14	0.00389365	-0.28556	0.56	0.645	1
Mef2c	0.00411176	0.404428	0.681	0.596	1
Pitpnc1	0.0041777	0.250317	0.638	0.543	1
Slc35f4	0.00429026	0.295057	0.695	0.611	1
Mast4	0.00503243	0.289021	0.592	0.509	1
Pcdh9	0.00532765	0.410444	0.972	0.966	1
Cdh4	0.00544005	-0.288774	0.504	0.596	1
Gm26871	0.0059668	-0.289664	0.486	0.592	1
Grik1	0.00706218	0.481118	0.755	0.66	1
Cdh9	0.00767405	0.302615	0.404	0.302	1
Ptgds	0.00894944	0.285146	0.27	0.177	1
Lmo3	0.0091931	-0.259258	0.284	0.385	1
Pvt1	0.0103729	0.298679	0.493	0.4	1
Gria1	0.0107664	-0.259628	0.848	0.909	1
Cacna1e	0.0110057	-0.334617	0.454	0.536	1
Sox6	0.0117867	-0.260922	0.67	0.713	1
Zfp804a	0.0137965	0.325335	0.745	0.691	1
Zbtb20	0.0171363	-0.282348	0.78	0.781	1
Btbd11	0.0199922	0.263252	0.578	0.509	1
Pcdh15	0.022694	-0.318531	0.844	0.902	1
Satb1	0.0258877	0.352951	0.387	0.317	1
Nnat	0.0265326	-0.343886	0.379	0.449	1
Plp1	0.0281975	0.298568	0.319	0.234	1
Zfp804b	0.0360352	0.462893	0.39	0.302	1
Unc5c	0.0455897	0.290739	0.791	0.728	1
Pde3a	0.0482222	-0.253741	0.33	0.396	1
Unc13c	0.0504023	0.322067	0.301	0.238	1
Alcam	0.0514527	-0.278568	0.691	0.709	1
Lrp1b	0.0524608	0.294489	0.894	0.887	1
Npas3	0.0590181	0.546375	0.496	0.449	1
Dock4	0.0590294	0.320485	0.691	0.645	1
Egfem1	0.0650908	0.445074	0.635	0.6	1
A830018L16Rik	0.0960276	0.446434	0.418	0.385	1
Asic2	0.100113	0.342527	0.894	0.891	1
Pcp4	0.107602	-0.301317	0.454	0.506	1
Schip1	0.117198	-0.281736	0.482	0.509	1
Nos1	0.19334	-0.29018	0.223	0.264	1
Efna5	0.258973	-0.333182	0.741	0.781	1
Kcnc2	0.280794	0.436038	0.738	0.762	1
Mgat4c	0.317986	0.342738	0.674	0.675	1
Ptprt	0.451113	-0.251116	0.493	0.525	1
Gm20754	0.799359	0.330937	0.362	0.362	1
Gm38505	0.809411	-0.258075	0.429	0.377	1

## Sheet: thiamine_cluster7R61thiaminevsV
Column1	p_val	avg_log2FC	pct.1	pct.2	p_val_adj
AC149090.1	7.05416e-09	-0.401058	0.909	0.956	0.000179394
AY036118	3.48942e-08	-0.347478	0.996	1	0.000887395
Gm42418	3.14744e-07	-0.266806	1	1	0.00800426
Cd9	3.50001e-07	0.36214	0.951	0.893	0.00890089
Rer1	6.30751e-07	0.319654	0.382	0.204	0.0160406
Pllp	8.68273e-07	0.417424	0.674	0.541	0.0220811
Neu4	9.94847e-07	0.371389	0.716	0.55	0.0252999
Gm47283	1.98938e-06	-0.381679	0.688	0.821	0.0505918
Tuba1a	3.95817e-06	0.368041	0.912	0.858	0.10066
C130073E24Rik	4.76882e-06	-0.37361	0.284	0.453	0.121276
Pbx1	9.35731e-06	-0.296001	0.895	0.937	0.237966
Ckb	1.00706e-05	0.366818	0.975	0.953	0.256105
Cfl1	1.25692e-05	0.33542	0.6	0.453	0.319648
Cd81	1.53221e-05	0.30715	0.947	0.934	0.389655
Sulf2	2.84348e-05	0.356334	0.67	0.563	0.723126
Runx1t1	3.01815e-05	-0.268425	0.509	0.673	0.767546
Tenm3	3.52345e-05	-0.4104	0.474	0.613	0.896049
Slc4a10	5.58974e-05	-0.317995	0.544	0.686	1
Ppia	6.15805e-05	0.329449	0.968	0.915	1
Rpl13	7.53897e-05	0.437064	0.849	0.786	1
Selenom	8.37245e-05	0.289831	0.428	0.28	1
Mt1	9.69231e-05	0.337797	0.449	0.299	1
S100a16	0.000123456	0.30812	0.547	0.399	1
Adgrb3	0.000212262	-0.250147	0.982	0.987	1
C1ql1	0.000213259	0.404535	0.582	0.465	1
Rit2	0.000237395	-0.284453	0.446	0.591	1
Neto1	0.000274905	-0.285016	0.67	0.792	1
Wscd1	0.000314076	0.272647	0.488	0.349	1
Erc2	0.000345718	-0.273927	0.863	0.912	1
Psenen	0.000430736	0.26561	0.46	0.327	1
Rps11	0.000536378	0.294365	0.498	0.362	1
Zfp804a	0.000881237	-0.278863	0.446	0.563	1
H2afj	0.000968038	0.265448	0.361	0.242	1
St13	0.00103502	-0.272896	0.316	0.431	1
Sparcl1	0.00114454	0.284717	0.579	0.459	1
Atp5d	0.00115789	0.268293	0.396	0.292	1
Gm48091	0.00125638	0.268768	0.425	0.308	1
Sox10	0.00133939	0.256398	0.916	0.83	1
Fth1	0.00154424	0.272654	0.912	0.874	1
Olig1	0.00195437	0.288481	0.726	0.638	1
Tubb4a	0.00212799	0.258703	0.621	0.494	1
Enah	0.00216978	-0.269437	0.789	0.808	1
Chd3	0.00219964	0.325627	0.554	0.443	1
Cryab	0.00223086	0.357872	0.537	0.428	1
Tnr	0.00265984	0.278863	0.989	0.978	1
Slit3	0.00277781	-0.333722	0.495	0.582	1
S100a1	0.00369347	0.255089	0.386	0.283	1
Lamp1	0.00437736	0.259944	0.663	0.582	1
Grin2b	0.00470567	-0.334919	0.702	0.755	1
Cntnap5a	0.00477289	-0.287608	0.351	0.447	1
Pde1c	0.00545178	-0.276067	0.495	0.594	1
Hs6st3	0.00702485	-0.377446	0.653	0.72	1
Syt1	0.00747343	-0.316416	0.832	0.868	1
Pcdh11x	0.00749678	-0.258571	0.874	0.871	1
Meis2	0.00784941	-0.319345	0.842	0.874	1
Phactr1	0.00947123	-0.301799	0.982	0.991	1
Rpl11	0.0098604	0.250757	0.547	0.469	1
Kirrel3	0.009982	-0.284906	0.846	0.918	1
Fgf14	0.0106177	-0.267233	0.965	0.972	1
Foxp1	0.0108164	-0.269507	0.888	0.918	1
Rarb	0.0118432	-0.284955	0.628	0.717	1
Lims2	0.0126842	0.260843	0.382	0.296	1
Epb41l2	0.0145331	0.308744	0.481	0.393	1
Lrfn5	0.0153527	-0.252285	0.849	0.871	1
Spock3	0.0163276	-0.274127	0.705	0.752	1
Cspg5	0.0208998	0.350613	0.66	0.623	1
Cntnap2	0.0215162	-0.408718	0.842	0.881	1
Celf2	0.0275423	-0.298592	0.958	0.965	1
Robo2	0.0352294	-0.256412	0.653	0.72	1
Sema4d	0.0370758	0.253572	0.34	0.264	1
Tenm2	0.0560259	-0.317955	0.849	0.871	1
Bcas1	0.0582897	0.313297	0.874	0.877	1
Kcnip4	0.0583436	-0.323224	0.888	0.871	1
Meg3	0.0742223	-0.260784	0.975	0.984	1
9630013A20Rik	0.309874	0.301698	0.361	0.327	1
Lingo2	0.366512	-0.294811	0.663	0.711	1
Pik3r3	0.388685	0.35384	0.368	0.34	1
Mbp	0.454989	0.259307	0.716	0.698	1

## Sheet: thiamine_cluster8R61thiaminevsV
Column1	p_val	avg_log2FC	pct.1	pct.2	p_val_adj
Tyrobp	2.31726e-06	0.64639	0.724	0.606	0.0589303
C1qb	2.34224e-06	0.800135	0.939	0.85	0.0595656
Cst3	2.50027e-06	0.815157	1	1	0.0635843
Ltc4s	9.3153e-06	0.506557	0.675	0.456	0.236897
Ctss	1.95102e-05	0.628552	0.859	0.787	0.496163
Atp11a	2.5911e-05	-0.354987	0.092	0.269	0.658942
C1qa	3.31156e-05	0.729794	0.926	0.869	0.842164
Prickle2	3.44785e-05	-0.35264	0.902	0.975	0.876822
C1qc	3.66326e-05	0.713067	0.89	0.863	0.931605
Ifngr1	5.08313e-05	0.426134	0.528	0.319	1
Unc5c	5.35801e-05	-0.494906	0.89	0.963	1
Itm2b	7.98519e-05	0.498865	0.994	0.963	1
Immp2l	8.10072e-05	-0.420077	0.871	0.938	1
Trem2	8.90095e-05	0.551833	0.81	0.662	1
Hexb	9.71354e-05	0.554744	0.982	0.969	1
Chchd3	0.000108266	-0.359375	0.724	0.819	1
Lgmn	0.000184999	0.489616	0.859	0.812	1
Selplg	0.000208828	0.522912	0.816	0.719	1
Setd2	0.000234771	-0.383735	0.319	0.519	1
Tmcc1	0.000304432	-0.395121	0.975	0.994	1
Stk38	0.000362155	-0.269501	0.239	0.456	1
Cx3cr1	0.000400504	0.401215	0.908	0.85	1
Phlpp1	0.00044599	-0.516143	0.902	0.956	1
Nrgn	0.000458206	0.339195	0.914	0.819	1
Arhgap23	0.000582458	-0.501242	0.135	0.288	1
Stxbp6	0.000589237	-0.392672	0.11	0.25	1
Adipor2	0.000604678	-0.394532	0.178	0.338	1
Lrch3	0.000635399	-0.351357	0.429	0.6	1
Limch1	0.000659673	-0.304902	0.902	0.95	1
Robo1	0.000689614	-0.460398	0.933	0.981	1
Cdh10	0.000776275	-0.295503	0.89	0.931	1
Myo6	0.000963402	-0.471832	0.209	0.362	1
Tmsb4x	0.00101565	0.427945	0.963	0.981	1
Vgll4	0.0010367	-0.330098	0.294	0.469	1
Sh3d19	0.00105108	-0.419443	0.117	0.256	1
Grm3	0.00111899	-0.275865	0.902	0.938	1
Nkain2	0.00117166	-0.561316	1	1	1
Bin2	0.00122265	0.350956	0.558	0.388	1
Pld4	0.00124648	0.390731	0.509	0.356	1
Ssr4	0.00125053	0.433648	0.436	0.294	1
Ext1	0.00126364	-0.299935	0.84	0.9	1
Tasor	0.0013949	-0.358963	0.368	0.55	1
D7Ertd443e	0.00144908	-0.554638	0.215	0.35	1
Dnm3	0.00149658	-0.446514	0.945	0.994	1
Hspa8	0.00150721	0.279116	0.933	0.875	1
Tmeff2	0.00152839	-0.658394	0.945	0.956	1
Rpl21	0.0015838	0.421868	0.558	0.412	1
Pak7	0.00171274	-0.257159	0.871	0.919	1
Cd81	0.00179832	0.499651	0.896	0.869	1
Hnrnpc	0.00193613	-0.283773	0.405	0.594	1
Srbd1	0.0019968	-0.269455	0.141	0.281	1
Ptprd	0.0020421	-0.38629	0.994	1	1
Timmdc1	0.00212911	-0.311843	0.172	0.306	1
Zfp536	0.00214137	-0.614902	0.35	0.488	1
Ctsd	0.00226973	0.511342	0.785	0.688	1
Grid2	0.00229971	-0.330988	0.988	1	1
Dlg1	0.00233856	-0.267114	0.945	0.963	1
Tmtc2	0.00241005	-0.496603	0.368	0.512	1
Pacs2	0.00242235	-0.337588	0.178	0.312	1
Rab18	0.0026417	0.27276	0.276	0.144	1
Camk1	0.00277465	0.276312	0.663	0.531	1
Cfl1	0.00283149	0.321475	0.528	0.369	1
Rps7	0.00286844	0.35575	0.374	0.238	1
Atp6v0c	0.00290711	0.27249	0.963	0.912	1
St6galnac3	0.00293616	-0.312957	0.804	0.9	1
Arnt2	0.00302429	-0.265587	0.141	0.275	1
Abhd17b	0.0030553	-0.29428	0.288	0.444	1
Znrf2	0.00308375	-0.301946	0.27	0.431	1
Cntn3	0.00309133	-0.32746	0.767	0.85	1
Ncoa3	0.00315686	-0.343274	0.399	0.562	1
Fmnl2	0.0032069	-0.377843	0.393	0.55	1
Pde4b	0.00320721	-0.876945	0.957	0.981	1
Phip	0.00333568	-0.293808	0.742	0.844	1
Aif1	0.00334257	0.40425	0.368	0.244	1
Anxa3	0.00335011	0.292429	0.718	0.656	1
H2-K1	0.0033815	0.399872	0.423	0.288	1
Calm2	0.00342298	0.260886	0.975	0.956	1
Gpr34	0.0034543	0.39343	0.816	0.781	1
Ctsz	0.00351707	0.444138	0.595	0.519	1
Aatk	0.00353077	-0.333187	0.178	0.312	1
Sh3bgrl3	0.00362256	0.366681	0.374	0.25	1
Txndc16	0.00362717	-0.254336	0.221	0.375	1
Tmx4	0.00373328	-0.26036	0.252	0.412	1
Jakmip3	0.00377078	-0.312957	0.153	0.275	1
B3galt1	0.00377725	-0.313399	0.988	0.969	1
Fryl	0.00379275	-0.293037	0.687	0.8	1
Il6st	0.00400561	0.365961	0.571	0.45	1
Phldb1	0.00409036	-0.350095	0.129	0.25	1
Uqcr11	0.00415719	0.260081	0.27	0.144	1
Eif2s2	0.0041975	-0.280041	0.288	0.444	1
Glrb	0.00421731	-0.280184	0.362	0.519	1
Sp4	0.00427055	-0.252772	0.209	0.356	1
Scamp5	0.0044318	-0.32269	0.252	0.394	1
Tra2a	0.00453493	-0.312957	0.957	0.994	1
Ly86	0.0045512	0.319415	0.951	0.881	1
Sik2	0.00461583	-0.424677	0.368	0.506	1
Slc38a6	0.00464021	-0.309831	0.16	0.288	1
Ssh2	0.0047387	-0.297892	0.988	0.994	1
Olfml3	0.00491658	0.449798	0.466	0.331	1
Fcrls	0.00491788	0.405483	0.62	0.519	1
Glt8d1	0.0050571	-0.271714	0.227	0.369	1
Rpl6	0.0051922	0.252461	0.883	0.875	1
Flnb	0.00523495	-0.268327	0.172	0.3	1
Magi3	0.00548509	-0.304168	0.166	0.294	1
Scn3a	0.00554953	-0.250923	0.356	0.488	1
Dip2a	0.00568424	-0.268875	0.135	0.256	1
Rnase4	0.00568497	0.366467	0.344	0.231	1
Camkmt	0.00586654	-0.278532	0.491	0.606	1
Laptm4a	0.00587339	0.312976	0.405	0.262	1
St18	0.0059427	-0.712615	0.693	0.775	1
Sft2d1	0.00616618	0.395433	0.552	0.456	1
Prr5l	0.00631942	-0.78713	0.202	0.319	1
Exoc6	0.00648879	-0.251615	0.252	0.4	1
Wapl	0.0064975	-0.271037	0.356	0.519	1
Gm48678	0.00661111	-0.329824	0.577	0.669	1
Fcer1g	0.00667757	0.391941	0.626	0.488	1
Ptk2	0.0068692	-0.258264	0.92	0.944	1
Magi2	0.00717098	-0.438595	1	1	1
Tcf12	0.00720106	-0.279326	0.951	0.988	1
Kat2b	0.00720862	-0.299819	0.184	0.312	1
Pld3	0.00732948	0.284943	0.276	0.162	1
Tmem117	0.00746397	-0.309734	0.288	0.412	1
Rc3h2	0.00749387	-0.267808	0.344	0.488	1
Ncam2	0.00753467	-0.339218	0.982	0.981	1
Rpl29	0.00774988	0.359091	0.325	0.206	1
Kat6a	0.00787002	-0.281519	0.337	0.488	1
Sox4	0.00810899	0.293692	0.258	0.144	1
Rps11	0.00849887	0.402043	0.485	0.369	1
Enpp2	0.00862952	-0.478122	0.423	0.544	1
Cdh20	0.00875528	-0.600081	0.153	0.262	1
Znrf3	0.00881136	-0.311103	0.147	0.256	1
Ftl1	0.00881608	0.387074	0.515	0.412	1
Mpp5	0.00892252	-0.268875	0.153	0.269	1
Dock9	0.00902812	-0.332608	0.356	0.488	1
Tbc1d14	0.00924621	0.276691	0.423	0.294	1
Tank	0.00946022	0.293773	0.319	0.206	1
Ddx3y	0.00947073	-0.265485	0.239	0.375	1
Mark2	0.0095508	-0.278339	0.546	0.675	1
Trir	0.00960989	0.266736	0.27	0.162	1
Man2b1	0.00961556	0.288938	0.577	0.45	1
Gm47283	0.00968645	-0.281555	0.896	0.906	1
Srgap2	0.00973324	0.269356	0.988	0.994	1
Ppp6c	0.00983532	-0.26029	0.209	0.338	1
Tpt1	0.00985621	0.454733	0.423	0.319	1
Igf1r	0.00986006	-0.255674	0.601	0.719	1
Cd14	0.0101475	0.276127	0.319	0.2	1
Pfn1	0.0103088	0.254971	0.288	0.175	1
Gse1	0.010613	-0.251173	0.172	0.288	1
Gmip	0.0106352	0.257408	0.405	0.275	1
Tmem59	0.0106433	0.254311	0.84	0.775	1
Dscaml1	0.0107124	-0.307936	0.699	0.794	1
Dph6	0.0107594	-0.263839	0.209	0.338	1
Anapc1	0.0111509	-0.272961	0.184	0.3	1
Cd68	0.0111539	0.525741	0.38	0.281	1
Tm6sf1	0.0112549	0.312406	0.411	0.288	1
Kirrel3	0.0116257	-0.452707	0.933	0.956	1
Amph	0.0116842	-0.304334	0.509	0.594	1
Tmem131	0.0117124	-0.283633	0.325	0.456	1
Fau	0.0121648	0.453769	0.706	0.675	1
2610035D17Rik	0.0124501	-0.252681	0.19	0.312	1
H3f3b	0.0131012	0.255093	0.761	0.694	1
Dennd1c	0.0131915	0.266763	0.362	0.25	1
Slc1a3	0.013342	-0.280124	0.38	0.512	1
Rpl28	0.0134459	0.377694	0.515	0.456	1
Csf1r	0.0138454	0.329152	0.877	0.812	1
Cd9	0.0141808	0.51439	0.656	0.6	1
Rac1	0.0144644	0.283009	0.46	0.356	1
Mpeg1	0.0149179	0.313882	0.313	0.2	1
Tmem173	0.0149349	0.263328	0.288	0.181	1
Rhob	0.0149403	0.278577	0.429	0.312	1
2210408F21Rik	0.0149913	-0.282814	0.166	0.269	1
Tmem178b	0.0150102	-0.261265	0.969	0.988	1
Pak1	0.015175	-0.262313	0.491	0.619	1
Anapc10	0.0154275	-0.251173	0.166	0.275	1
Shtn1	0.0158218	-0.276492	0.785	0.825	1
Rpl18a	0.0159969	0.382005	0.454	0.344	1
Gpm6b	0.0162917	-0.310127	0.982	0.981	1
B2m	0.0163146	0.349348	0.558	0.462	1
Erp29	0.0168132	0.315755	0.423	0.338	1
Gnai1	0.0169927	-0.328069	0.172	0.275	1
Slc24a2	0.0170602	-0.5257	0.975	0.963	1
Ep300	0.0174712	-0.253309	0.362	0.488	1
Gm28376	0.0175292	-0.288746	0.252	0.35	1
Grn	0.0176775	0.471401	0.405	0.312	1
Rpl37	0.0177268	0.300521	0.399	0.3	1
Pcdh9	0.0177761	-0.600815	0.994	0.994	1
Fam13b	0.0178397	-0.254211	0.448	0.544	1
Srpr	0.0183428	0.275934	0.344	0.231	1
Gapdh	0.0188478	0.296169	0.957	0.912	1
Cdh11	0.0191019	-0.269103	0.442	0.55	1
Mbp	0.0199063	-0.48797	0.871	0.881	1
Map7	0.020028	-0.262867	0.914	0.925	1
Rab3a	0.0204711	0.277409	0.282	0.181	1
Arhgap27	0.0205516	0.252015	0.258	0.162	1
Slc12a2	0.0213008	-0.338002	0.362	0.475	1
Naaladl2	0.0213813	-0.431728	0.804	0.863	1
Pmepa1	0.0217339	0.318911	0.638	0.544	1
Fars2	0.02227	-0.2913	0.552	0.669	1
Rplp2	0.0222978	0.253651	0.387	0.275	1
H2-D1	0.0224838	0.297511	0.35	0.244	1
Rnf138	0.0226058	-0.284919	0.264	0.375	1
Ppcdc	0.0227132	0.279562	0.687	0.588	1
Tubb4a	0.0229099	-0.255619	0.663	0.756	1
Dmd	0.0231982	-0.282502	0.945	0.956	1
Psap	0.0237094	0.261961	0.902	0.887	1
Trafd1	0.0237415	0.273139	0.374	0.269	1
Lgals9	0.0237813	0.281539	0.411	0.312	1
Laptm5	0.0240464	0.383484	0.583	0.55	1
Hexa	0.0249107	0.30851	0.479	0.375	1
Gsap	0.0253301	-0.26182	0.307	0.419	1
Soga1	0.0266865	0.259059	0.577	0.45	1
Ptgs1	0.0282142	0.297822	0.54	0.456	1
Plcl1	0.0283111	-0.269423	0.957	0.988	1
Rps27	0.0283721	0.281558	0.362	0.269	1
Nbas	0.0294184	-0.316307	0.485	0.6	1
Ctsh	0.0304375	0.266931	0.534	0.462	1
Kdm2a	0.0306776	-0.280824	0.595	0.688	1
P2ry12	0.0309577	0.29267	0.914	0.906	1
Rgs10	0.0310441	0.296535	0.663	0.581	1
Tmem50a	0.0315857	0.359923	0.454	0.369	1
Itgb5	0.0320313	0.311668	0.761	0.719	1
Timm10b	0.0322317	0.262707	0.307	0.219	1
Rps18	0.03278	0.289775	0.301	0.212	1
Erbb4	0.0332652	-0.48362	0.908	0.925	1
Ano4	0.0339082	-0.36175	0.822	0.863	1
Cyba	0.0345855	0.327808	0.503	0.412	1
Cdh23	0.0347021	0.264018	0.497	0.4	1
Acaca	0.0365161	-0.34477	0.503	0.575	1
Pcdh15	0.0375267	-0.339588	0.252	0.35	1
Sox2ot	0.0388255	-0.325663	0.896	0.906	1
Sept4	0.0390254	-0.261536	0.19	0.288	1
Rpl24	0.0398376	0.273373	0.454	0.375	1
Rps29	0.0404917	0.25477	0.552	0.444	1
Thrap3	0.0405893	0.266799	0.454	0.362	1
Lrp1b	0.0412721	-0.342694	0.994	1	1
Rpl32	0.0430854	0.29144	0.35	0.262	1
Zfp280c	0.0432468	-0.263061	0.429	0.512	1
Mog	0.0443382	-0.332766	0.19	0.288	1
Rps3	0.0452137	0.272425	0.411	0.312	1
Slc24a3	0.0460083	-0.255242	0.503	0.606	1
Uqcrq	0.0464125	0.261497	0.258	0.175	1
Map4k5	0.0481042	-0.251615	0.282	0.375	1
Tmem119	0.0484422	0.291224	0.491	0.419	1
Zfp398	0.0502175	0.271541	0.313	0.225	1
Slc25a5	0.0504729	0.305603	0.368	0.306	1
Pbx3	0.0517661	-0.288325	0.92	0.9	1
Ubc	0.0535089	0.280961	0.503	0.431	1
Edil3	0.0542871	-0.451298	0.914	0.931	1
Hmgb1	0.0545312	0.253936	0.411	0.331	1
Rtn4rl1	0.0549583	0.264147	0.411	0.331	1
Vsir	0.055049	0.268105	0.669	0.6	1
Ndufc2	0.0553714	0.274856	0.374	0.288	1
Golm1	0.0555797	0.29424	0.528	0.45	1
Fcgr3	0.0630877	0.276047	0.436	0.356	1
Frmd5	0.0642837	-0.357539	0.957	0.963	1
Bank1	0.0657442	0.285295	0.38	0.3	1
Rps20	0.0733615	0.265753	0.356	0.294	1
Sf3b3	0.0736116	0.295128	0.337	0.275	1
Rabgap1l	0.076804	-0.256001	0.939	0.944	1
Slc2a5	0.0775791	0.265841	0.264	0.2	1
Mrps5	0.0786985	0.258954	0.252	0.181	1
Rpl27a	0.0788706	0.267036	0.626	0.55	1
Ctnna2	0.0827059	-0.260698	0.994	1	1
Scamp2	0.0846385	0.25593	0.479	0.431	1
Rps16	0.0857465	0.317496	0.362	0.3	1
Ptgds	0.0920641	-0.528731	0.626	0.706	1
Lrig2	0.0923622	0.261497	0.301	0.238	1
Npas3	0.130481	-0.293962	0.577	0.625	1
Maf	0.133125	-0.277296	0.564	0.625	1
Rnf220	0.153355	-0.380289	0.73	0.762	1
Gpc6	0.169781	-0.260597	0.724	0.738	1
Sparc	0.208548	0.323957	0.613	0.588	1
Plp1	0.227991	-0.338931	0.853	0.869	1
Lsamp	0.238079	-0.365621	0.982	0.994	1
Pex5l	0.267877	-0.497282	0.859	0.856	1
Dpp10	0.286473	0.587984	0.896	0.844	1
P2rx7	0.440783	0.255235	0.368	0.35	1

[truncated: 6 more sheets: thiamine_cluster9R61thiaminevsV, thiamine_cluster10R61thiaminevs, thiamine_cluster11R61thiaminevs, thiamine_cluster12R61thiaminevs, thiamine_cluster13R61thiaminevs, Sheet2]
