# Supplementary material for: Huntington disease oligodendrocyte maturation deficits revealed by single-nucleus RNAseq are rescued by thiamine-biotin supplementation
Source: Nat Commun. 2022 Dec 21;13:7791. doi: 10.1038/s41467-022-35388-x (PMC9772349; doi:10.1038/s41467-022-35388-x)
Supplement: Supplementary file 14 — Supplementary Dataset 12 [file 41467_2022_35388_MOESM14_ESM.xlsx]

## Sheet: thiamine_cluster0R61thiaminevsN
Column1	p_val	avg_log2FC	pct.1	pct.2	p_val_adj
Celf2	0	-0.459515	1	1	0
Gm10754	0	-1.20084	0.846	0.98	0
Rgs9	0	-1.08787	0.946	0.993	0
Meg3	0	0.672265	1	1	0
Adcy5	0	-0.884359	0.881	0.988	0
Pde10a	0	-1.10734	0.999	1	0
Malat1	0	-0.644297	1	1	0
Pcp4	4.77878e-294	-1.13018	0.868	0.979	1.21529e-289
AC149090.1	5.99647e-287	-1.02744	0.85	0.993	1.52496e-282
Mgat4c	4.31458e-274	1.08326	0.984	0.834	1.09724e-269
Phactr1	7.70435e-274	-0.593694	1	1	1.95929e-269
Grip1	2.17351e-255	0.963767	0.958	0.71	5.52746e-251
Ogt	3.94418e-245	0.745669	0.978	0.858	1.00304e-240
Mhrt	4.03367e-236	-1.01574	0.236	0.688	1.0258e-231
Ppp3ca	5.41577e-222	-0.485919	1	1	1.37728e-217
Cmss1	1.28333e-214	-0.863802	0.983	0.999	3.26363e-210
Lsamp	1.73976e-213	0.643745	1	0.994	4.42438e-209
Sfmbt2	8.62736e-211	0.609512	0.398	0.009	2.19402e-206
Gm28905	1.14253e-205	-0.92205	0.639	0.92	2.90557e-201
Lpp	1.24248e-205	0.741308	0.605	0.158	3.15974e-201
Ddx5	1.41279e-195	0.543876	1	0.995	3.59286e-191
Camk4	2.4973e-195	-0.690843	0.962	0.996	6.35088e-191
Frmd4a	3.61654e-194	0.740082	0.963	0.883	9.19723e-190
Robo1	1.90896e-191	0.597931	0.999	0.995	4.85468e-187
Scn4b	3.66775e-189	-0.748221	0.307	0.707	9.32745e-185
Dclk1	8.33217e-184	-0.629064	0.955	0.996	2.11895e-179
Homer1	5.59103e-181	-0.8933	0.777	0.939	1.42185e-176
Atp2b1	6.55953e-175	-0.496731	1	1	1.66815e-170
Ror1	5.85112e-172	-0.854308	0.192	0.583	1.488e-167
Spock3	1.30847e-164	-0.572172	0.996	0.998	3.32758e-160
Camkv	1.55419e-164	-0.629146	0.767	0.943	3.95246e-160
Arhgap10	1.37362e-161	-0.642703	0.831	0.962	3.49325e-157
A230006K03Rik	6.58871e-160	0.691141	0.951	0.87	1.67558e-155
Osbpl8	2.48788e-158	-0.653998	0.942	0.981	6.32692e-154
Ppp1r1b	5.96527e-157	-0.64921	0.638	0.891	1.51703e-152
Magi2	8.38011e-156	0.428367	1	1	2.13114e-151
Npas2	4.11844e-155	-0.653175	0.705	0.927	1.04736e-150
Ryr1	5.10109e-154	-0.642121	0.2	0.569	1.29726e-149
Grik2	2.26846e-153	-0.477689	1	1	5.76893e-149
Rbm39	2.72864e-153	0.460599	0.998	0.989	6.93921e-149
Rap1gap	3.11805e-153	-0.67302	0.654	0.892	7.92951e-149
Itpr1	1.81489e-152	-0.564375	0.963	0.992	4.61544e-148
Cntnap3	5.14401e-152	-0.798902	0.278	0.635	1.30817e-147
Fam155a	5.07389e-151	0.935226	0.824	0.508	1.29034e-146
Epyc	1.94876e-149	-0.498124	0.068	0.398	4.95589e-145
Arpp21	4.0044e-149	-0.423786	0.999	1	1.01836e-144
Neto2	4.08475e-147	-0.698818	0.561	0.844	1.03879e-142
Ppfia2	7.87524e-146	0.566333	0.969	0.858	2.00275e-141
Rhobtb2	1.32442e-145	-0.676211	0.449	0.758	3.36814e-141
Inf2	2.57273e-144	-0.646411	0.664	0.887	6.5427e-140
Cdh18	1.21425e-143	0.768456	0.965	0.785	3.08795e-139
Rian	1.74279e-142	0.47288	0.997	0.983	4.43208e-138
Lrfn5	3.38248e-141	0.464323	0.999	0.997	8.60198e-137
5330417C22Rik	9.67001e-138	-0.623934	0.626	0.869	2.45918e-133
Rsrp1	1.66313e-136	0.489176	0.984	0.924	4.2295e-132
Cttnbp2	1.96507e-136	-0.502189	0.991	0.998	4.99738e-132
Nrxn1	1.74226e-135	0.383131	1	1	4.43073e-131
Gm20754	2.11276e-135	0.763999	0.876	0.653	5.37295e-131
Lrrk2	2.20259e-135	-0.644844	0.587	0.845	5.6014e-131
Kcnq1ot1	7.07153e-135	0.614199	0.957	0.864	1.79836e-130
Pde7b	4.01858e-134	-0.521586	0.997	0.997	1.02197e-129
Cacna2d3	3.26928e-133	-0.351836	1	1	8.3141e-129
Snhg11	8.72468e-131	0.44764	0.999	0.999	2.21877e-126
Baiap2	9.68551e-127	-0.522104	0.879	0.974	2.46312e-122
Stmn2	1.13521e-126	0.619767	0.719	0.394	2.88696e-122
Agbl4	4.21346e-126	0.614351	0.93	0.772	1.07152e-121
Ppp4r4	2.36896e-124	-0.585804	0.487	0.771	6.02449e-120
Scaper	6.4807e-124	0.541492	0.899	0.708	1.64811e-119
Pde1b	1.03909e-121	-0.528453	0.779	0.926	2.64252e-117
Arpp19	7.84915e-121	-0.606307	0.565	0.808	1.99612e-116
Ube3a	8.00275e-121	0.418292	1	0.994	2.03518e-116
Gsg1l	2.29988e-119	-0.610625	0.429	0.714	5.84883e-115
AI480526	2.83373e-119	0.502061	0.527	0.197	7.20647e-115
Grm5	3.63692e-118	-0.29796	1	1	9.24906e-114
Strn	6.90246e-118	-0.564323	0.88	0.959	1.75537e-113
Sema6d	1.17879e-117	0.634287	0.903	0.726	2.99779e-113
Pnn	7.35959e-117	0.528932	0.894	0.723	1.87162e-112
Dmd	3.9163e-116	0.519375	0.984	0.901	9.95953e-112
Zranb2	1.0999e-115	0.431085	0.989	0.951	2.79717e-111
Cyld	3.63663e-113	-0.531991	0.804	0.944	9.24831e-109
Dbp	6.63641e-113	-0.507817	0.242	0.555	1.68771e-108
Prkcb	1.17595e-111	-0.495137	0.975	0.985	2.99056e-107
Nrg3	2.79015e-110	0.483695	0.995	0.977	7.09563e-106
Cdr1os	5.31373e-108	0.420036	0.993	0.984	1.35134e-103
Cep164	1.08395e-107	0.517641	0.671	0.373	2.75659e-103
Ebf1	2.23625e-107	0.6611	0.916	0.83	5.68702e-103
Guf1	4.00052e-107	0.487823	0.632	0.319	1.01737e-102
Sgcz	4.23001e-107	0.508448	0.996	0.95	1.07573e-102
Snrnp70	7.19503e-107	0.401871	0.995	0.975	1.82977e-102
Zfyve28	1.99146e-106	-0.50568	0.633	0.847	5.06449e-102
Luc7l2	2.08253e-106	0.388688	0.997	0.996	5.29609e-102
Camk2b	7.9747e-106	-0.483165	0.806	0.938	2.02805e-101
Kcnh4	9.05806e-106	-0.477852	0.215	0.519	2.30355e-101
Srsf11	1.56723e-105	0.430566	0.981	0.931	3.98562e-101
Dok6	4.63796e-105	0.49019	0.967	0.858	1.17948e-100
Cacna2d1	1.51239e-102	0.426103	0.986	0.959	3.84616e-98
Pcsk1n	5.42408e-102	0.64027	0.907	0.814	1.3794e-97
Ralyl	1.59831e-101	0.585164	0.913	0.672	4.06467e-97
Sec14l1	1.73099e-101	-0.530476	0.532	0.765	4.40209e-97
Slc6a6	4.96752e-101	-0.503887	0.77	0.92	1.26329e-96
Anks1b	1.19499e-100	-0.357362	1	1	3.03899e-96
Enah	3.73415e-100	0.51357	0.781	0.531	9.49632e-96
Atp6v0c	4.13644e-100	0.565794	0.948	0.879	1.05194e-95
Kcnip3	7.9777e-100	-0.565034	0.511	0.765	2.02881e-95
Ppp1r1a	9.49463e-100	-0.54041	0.467	0.727	2.41458e-95
Erc2	7.44086e-99	-0.335115	0.999	1	1.89229e-94
Gm49906	2.17126e-98	-0.667498	0.384	0.68	5.52173e-94
Pde2a	9.04863e-98	-0.494016	0.824	0.937	2.30116e-93
Kcnq5	3.338e-97	-0.369723	1	1	8.48888e-93
Tmem178b	4.27164e-97	0.458277	0.972	0.918	1.08632e-92
Polr2a	6.74881e-97	0.462647	0.491	0.197	1.71629e-92
Gm15810	1.00551e-95	-0.513556	0.688	0.878	2.55711e-91
Rgs11	1.2354e-94	-0.447429	0.207	0.492	3.14174e-90
Pdzd2	3.23628e-94	-0.625473	0.786	0.908	8.23019e-90
Hpca	4.19201e-94	-0.528183	0.556	0.788	1.06607e-89
Chn1	3.04591e-92	-0.442288	0.928	0.975	7.74606e-88
Zswim6	1.49989e-91	-0.49413	0.913	0.963	3.81437e-87
Drd1	1.43969e-90	-0.489799	0.685	0.84	3.66129e-86
Tbc1d8	2.69067e-90	-0.520447	0.57	0.779	6.84264e-86
C130073E24Rik	2.80333e-90	0.669595	0.512	0.208	7.12914e-86
1700016P03Rik	2.95742e-90	-0.809359	0.081	0.315	7.52102e-86
Apc	3.5655e-90	0.431027	0.932	0.796	9.06742e-86
Gabrd	1.01372e-89	-0.490516	0.501	0.745	2.578e-85
Cntn5	1.26559e-89	-0.714824	0.982	0.984	3.21852e-85
Ccnl2	2.32847e-89	0.461983	0.824	0.622	5.92154e-85
Atf6	2.47184e-89	-0.524717	0.586	0.786	6.28615e-85
Scg5	1.50408e-88	0.467087	0.933	0.85	3.82504e-84
4930525C09Rik	1.39688e-87	-0.389906	0.15	0.415	3.55241e-83
Pcdh9	2.27133e-87	0.442834	0.993	0.948	5.77623e-83
Rims2	3.60948e-87	0.304959	1	1	9.17927e-83
4933424G05Rik	6.64774e-87	-0.506409	0.5	0.728	1.69059e-82
Atad2b	2.2456e-86	0.476551	0.68	0.424	5.71079e-82
Rasgef1a	4.38013e-86	-0.435466	0.744	0.891	1.11391e-81
Luc7l3	7.26422e-85	0.433674	0.923	0.808	1.84736e-80
Dgkb	8.08429e-85	-0.327461	1	1	2.05592e-80
Abi3bp	1.91136e-84	-0.481761	0.068	0.29	4.86077e-80
Ptpn5	2.0765e-84	-0.464557	0.821	0.925	5.28076e-80
Ank2	2.39161e-84	0.323031	1	0.996	6.0821e-80
Rasgrp2	4.02659e-84	-0.471726	0.425	0.675	1.024e-79
Penk	6.5615e-84	-0.556336	0.114	0.361	1.66866e-79
Cacna1a	1.193e-83	0.384358	0.996	0.979	3.03391e-79
Klf12	1.26798e-83	0.489266	0.814	0.607	3.2246e-79
Exoc4	2.04842e-83	0.393607	0.97	0.928	5.20935e-79
Mdk	2.52969e-83	-0.428538	0.209	0.475	6.43325e-79
Nrcam	5.15124e-83	0.44757	0.944	0.861	1.31001e-78
Gm19410	7.28914e-83	-0.43252	0.087	0.315	1.8537e-78
Scn9a	8.91112e-83	0.462988	0.561	0.286	2.26619e-78
Mapk4	2.73871e-82	-0.554582	0.745	0.873	6.96483e-78
2010300C02Rik	5.44972e-82	-0.416045	0.786	0.934	1.38592e-77
Fbxl16	9.75308e-82	-0.467374	0.506	0.725	2.48031e-77
Kcnip2	2.23729e-81	-0.453453	0.57	0.787	5.68966e-77
Sh2d5	2.38669e-81	-0.465991	0.385	0.634	6.0696e-77
Crocc	1.6557e-80	-0.433603	0.302	0.566	4.2106e-76
Camk2n1	1.74866e-80	-0.483296	0.547	0.761	4.44702e-76
Npas3	4.42949e-80	0.456788	0.352	0.114	1.12646e-75
Syp	8.06218e-80	0.455773	0.648	0.393	2.05029e-75
Son	1.84488e-79	0.375075	0.998	0.986	4.69172e-75
Dpy19l3	2.36686e-79	-0.443214	0.265	0.525	6.01916e-75
Itpka	2.59778e-79	-0.445268	0.437	0.68	6.60642e-75
Adamts6	3.74533e-79	0.393484	0.374	0.126	9.52476e-75
Clasp2	3.93164e-79	0.415831	0.88	0.72	9.99854e-75
Tiparp	4.234e-79	-0.586184	0.11	0.339	1.07675e-74
Ckb	1.1491e-78	-0.46871	0.922	0.979	2.92228e-74
Hrh3	1.20352e-78	-0.329842	0.07	0.284	3.06068e-74
Ppp1r16b	1.52666e-78	-0.472044	0.441	0.683	3.88245e-74
Dusp14	2.11915e-78	-0.455346	0.116	0.347	5.3892e-74
4930402H24Rik	4.73478e-78	0.395689	0.943	0.849	1.2041e-73
Traip	2.65894e-77	-0.466294	0.341	0.588	6.76194e-73
Pcsk2	3.4425e-77	-0.373919	0.982	0.995	8.75463e-73
A830036E02Rik	4.24974e-77	0.477767	0.589	0.318	1.08075e-72
Cdh13	2.64194e-76	-0.652926	0.708	0.842	6.71872e-72
Nav3	2.84094e-76	0.41386	0.979	0.929	7.22479e-72
A330102I10Rik	2.89518e-76	0.461676	0.719	0.483	7.36272e-72
Pmepa1	4.58777e-76	-0.484888	0.391	0.636	1.16672e-71
Ldlrad4	4.92616e-76	-0.567547	0.839	0.924	1.25277e-71
Ctnna2	7.80675e-76	0.295595	1	0.999	1.98533e-71
Olfm3	8.3345e-76	0.54032	0.551	0.291	2.11955e-71
4930598N05Rik	9.58305e-76	-0.360201	0.138	0.38	2.43706e-71
Grm3	1.61509e-75	-0.572494	0.768	0.9	4.10734e-71
Gas5	6.22481e-75	0.454404	0.789	0.581	1.58303e-70
Dlc1	1.05365e-74	0.456377	0.426	0.176	2.67953e-70
Gria1	2.10539e-74	0.29397	1	0.999	5.35423e-70
Fgf12	2.8694e-74	0.31822	0.998	0.996	7.29717e-70
Csmd2	5.29323e-74	0.437572	0.758	0.557	1.34612e-69
Mtcl1	2.53951e-73	-0.46608	0.695	0.848	6.45823e-69
Sgk3	5.21938e-73	-0.450713	0.639	0.829	1.32734e-68
Lmo2	1.99743e-72	-0.407326	0.266	0.517	5.07966e-68
Lhfpl3	2.39743e-72	0.463807	0.931	0.845	6.09691e-68
Fam184b	2.40631e-72	-0.468136	0.351	0.59	6.11948e-68
Ctxn1	6.51508e-72	-0.418402	0.405	0.647	1.65685e-67
Gpm6b	6.64028e-72	-0.399061	0.954	0.981	1.68869e-67
1700003D09Rik	9.76526e-72	-0.456197	0.411	0.644	2.4834e-67
Gli3	1.67851e-71	-0.491379	0.2	0.446	4.26863e-67
Calm2	4.31174e-71	-0.402768	0.979	0.996	1.09652e-66
Per1	6.60807e-71	-0.414354	0.142	0.366	1.6805e-66
Gmds	6.86837e-71	0.44426	0.764	0.572	1.7467e-66
Ablim1	1.01296e-70	0.433036	0.606	0.353	2.57606e-66
Trank1	1.09051e-70	-0.38154	0.909	0.967	2.77327e-66
Gpr83	2.99076e-70	-0.375505	0.137	0.362	7.60581e-66
Sgk1	6.67083e-70	-0.540439	0.734	0.844	1.69646e-65
Gpatch8	9.02904e-70	0.322008	0.994	0.977	2.29618e-65
Cacng4	8.44494e-69	-0.417818	0.405	0.637	2.14763e-64
Gm17231	9.51882e-69	-0.448483	0.366	0.596	2.42073e-64
Gng7	1.02794e-68	-0.381575	0.863	0.945	2.61416e-64
Bicd1	1.21887e-68	0.393382	0.874	0.759	3.0997e-64
Frmd4b	1.22965e-68	-0.456461	0.701	0.865	3.12712e-64
Nrgn	2.67023e-68	-0.587172	0.835	0.927	6.79065e-64
Ccser1	4.39525e-68	0.331795	0.998	0.989	1.11776e-63
Ntrk3	5.4153e-68	-0.340499	0.98	0.993	1.37717e-63
Kcnab1	1.65505e-67	-0.349756	0.998	0.996	4.20895e-63
Igsf21	2.19521e-67	-0.276258	0.063	0.253	5.58263e-63
Smpd3	2.79963e-67	-0.415156	0.799	0.921	7.11974e-63
Taf15	4.20086e-67	0.402925	0.768	0.589	1.06832e-62
Rtn1	8.00631e-67	0.332715	0.996	0.993	2.03609e-62
Rims1	8.95135e-67	0.313651	0.995	0.985	2.27642e-62
Rbm26	1.21682e-66	0.350309	0.964	0.92	3.09449e-62
Wipf3	1.60637e-66	-0.498175	0.528	0.706	4.08517e-62
D030068K23Rik	1.88899e-66	0.458873	0.482	0.242	4.80389e-62
Cacnb2	4.09701e-66	-0.511846	0.996	0.997	1.04191e-61
Tsnax	4.8282e-66	0.388568	0.815	0.649	1.22786e-61
Arid5b	5.9374e-66	0.450178	0.545	0.304	1.50994e-61
Gm47423	6.78302e-66	-0.649464	0.162	0.374	1.72499e-61
Actn2	7.34234e-66	-0.431089	0.757	0.876	1.86723e-61
Pbx1	7.44403e-66	0.406345	0.954	0.889	1.89309e-61
Slc4a10	2.02074e-65	0.395787	0.882	0.759	5.13894e-61
Tesc	2.48634e-65	-0.420551	0.524	0.723	6.32302e-61
Tmem117	2.66535e-65	0.422649	0.697	0.494	6.77825e-61
Plcb1	8.25695e-65	-0.299245	1	1	2.09983e-60
Vav3	2.68848e-64	0.420962	0.549	0.307	6.83707e-60
Bsg	4.34797e-64	0.428818	0.717	0.523	1.10573e-59
Ccdc88c	5.8641e-64	-0.390883	0.752	0.875	1.4913e-59
Plk5	6.98642e-64	-0.283522	0.085	0.283	1.77672e-59
Pard3	1.0331e-63	-0.385938	0.941	0.972	2.62727e-59
Rtn3	1.10655e-63	0.33253	0.968	0.931	2.81408e-59
Tfrc	1.16184e-63	0.381507	0.565	0.331	2.95468e-59
Cnr1	3.39335e-63	-0.833005	0.506	0.662	8.62964e-59
Slc24a2	4.63803e-63	-0.38642	0.932	0.968	1.1795e-58
Slc25a25	5.50256e-63	-0.411708	0.261	0.485	1.39935e-58
Mirg	7.27626e-63	0.411292	0.785	0.616	1.85043e-58
Pcdh11x	7.71975e-63	0.523708	0.757	0.564	1.96321e-58
Car12	8.69197e-63	-0.482742	0.305	0.526	2.21046e-58
Bcr	2.5545e-62	-0.391137	0.684	0.843	6.49634e-58
Lzts3	2.95723e-62	-0.372454	0.455	0.676	7.52052e-58
Cdc42bpa	4.27994e-62	0.322947	0.953	0.904	1.08843e-57
Exoc6b	5.5334e-62	0.356448	0.886	0.765	1.4072e-57
Nr3c2	6.00877e-62	0.406466	0.891	0.778	1.52809e-57
4930509J09Rik	1.04076e-61	0.460256	0.612	0.376	2.64675e-57
Spred1	1.92747e-61	-0.401544	0.641	0.816	4.90174e-57
Stk32a	2.47116e-61	-0.439339	0.551	0.744	6.28439e-57
P4ha1	2.53679e-61	-0.470891	0.507	0.701	6.45131e-57
Ccdc187	2.6582e-61	-0.330809	0.188	0.415	6.76008e-57
Agk	3.79686e-61	0.371395	0.629	0.402	9.65579e-57
U2surp	3.89724e-61	0.359105	0.895	0.81	9.91108e-57
Ppp1r2	6.68527e-61	-0.537536	0.618	0.769	1.70013e-56
Gng3	1.19526e-60	0.368804	0.561	0.331	3.03968e-56
Cx3cl1	1.87673e-60	-0.365804	0.664	0.83	4.7727e-56
Fstl5	3.29654e-60	0.433778	0.827	0.677	8.38344e-56
Syt2	4.0371e-60	-0.289404	0.112	0.313	1.02668e-55
Zmat4	5.1436e-60	-0.37116	0.157	0.369	1.30807e-55
Galnt18	8.80649e-60	-0.404003	0.699	0.863	2.23958e-55
Dync1i1	3.02139e-59	0.36874	0.891	0.795	7.68369e-55
Trip12	4.09038e-59	0.348159	0.873	0.749	1.04022e-54
Pid1	6.5386e-59	0.396831	0.501	0.271	1.66283e-54
Runx2	7.31341e-59	0.360543	0.471	0.239	1.85987e-54
Pde1c	1.19055e-58	-0.722244	0.527	0.714	3.02768e-54
AY036118	1.31724e-58	-0.45062	0.991	0.996	3.34988e-54
Prima1	1.62765e-58	-0.31561	0.103	0.294	4.13927e-54
Slc4a4	1.62804e-58	-0.335312	0.975	0.975	4.14026e-54
Gm13269	1.77424e-58	-0.470064	0.546	0.709	4.51208e-54
Per2	1.8492e-58	-0.272246	0.089	0.277	4.70269e-54
Kctd1	3.27932e-58	-0.386464	0.811	0.907	8.33964e-54
4930555F03Rik	3.2998e-58	0.470396	0.398	0.17	8.39173e-54
Nsun7	3.51713e-58	0.355116	0.583	0.353	8.94441e-54
Cnksr2	3.74909e-58	-0.32976	0.98	0.989	9.53432e-54
Camkk2	7.09215e-58	-0.373817	0.597	0.775	1.8036e-53
Snhg14	1.10016e-57	0.275149	0.998	0.995	2.79782e-53
Rbm28	1.36834e-57	0.367211	0.84	0.715	3.47983e-53
Sntb2	3.90287e-57	-0.427838	0.515	0.697	9.9254e-53
Camkk1	4.07364e-57	-0.290853	0.127	0.327	1.03597e-52
Baz2b	4.30561e-57	0.385419	0.839	0.7	1.09496e-52
Sorbs1	6.116e-57	-0.32987	0.933	0.969	1.55536e-52
Lrtm1	6.84208e-57	-0.405571	0.718	0.845	1.74001e-52
Zmynd8	7.60654e-57	-0.386748	0.547	0.736	1.93442e-52
Pafah1b1	9.29575e-57	0.339923	0.934	0.833	2.364e-52
Meis1	9.86635e-57	0.39308	0.454	0.224	2.50911e-52
Cntn6	1.79718e-56	0.400998	0.803	0.653	4.57041e-52
Hipk4	4.27587e-56	-0.253046	0.075	0.25	1.0874e-51
Cdk14	1.22197e-55	0.369587	0.532	0.312	3.10759e-51
Gm28494	1.48955e-55	-0.454872	0.153	0.348	3.78807e-51
Grm1	2.10648e-55	-0.461885	0.886	0.93	5.35699e-51
A330015K06Rik	2.3945e-55	-0.418482	0.933	0.971	6.08946e-51
Cacna1e	5.15248e-55	-0.303347	0.979	0.992	1.31033e-50
Ptchd4	9.02864e-55	0.409486	0.661	0.42	2.29607e-50
Etv5	1.30997e-54	-0.302449	0.113	0.3	3.33139e-50
Pla2g3	1.37792e-54	-0.326312	0.229	0.442	3.5042e-50
Rcan2	1.7647e-54	-0.381447	0.799	0.902	4.4878e-50
Itga9	1.87011e-54	-0.410263	0.187	0.387	4.75588e-50
Itm2b	2.51151e-54	0.419465	0.831	0.704	6.38702e-50
Gm10848	2.94422e-54	-0.473637	0.456	0.642	7.48744e-50
Spred2	9.8052e-54	-0.406017	0.42	0.618	2.49356e-49
Gpm6a	1.50967e-53	0.304428	0.97	0.949	3.83925e-49
Prickle2	1.65001e-53	0.350005	0.881	0.765	4.19615e-49
Ppp2r2a	2.52183e-53	-0.384002	0.694	0.849	6.41327e-49
Setbp1	2.54634e-53	0.359511	0.869	0.774	6.47559e-49
Syndig1l	8.7119e-53	-0.35184	0.401	0.605	2.21552e-48
Ndrg4	1.0658e-52	-0.32357	0.949	0.981	2.71044e-48
D430041D05Rik	1.07029e-52	-0.383638	0.777	0.903	2.72186e-48
Elmod1	1.23677e-52	-0.292779	0.983	0.993	3.14523e-48
Chd9	1.31885e-52	0.330991	0.914	0.838	3.35396e-48
Gm48749	1.49874e-52	-0.427612	0.355	0.555	3.81145e-48
Rgs7bp	1.71196e-52	-0.365601	0.968	0.978	4.35367e-48
Gm50024	2.33947e-52	-0.349353	0.274	0.481	5.94951e-48
Kcnh3	2.36579e-52	-0.316353	0.263	0.478	6.01645e-48
Rnf144a	3.67559e-52	-0.336654	0.157	0.351	9.34739e-48
Plk2	3.88943e-52	-0.422505	0.528	0.698	9.89121e-48
Tubb2a	3.89304e-52	0.354611	0.502	0.288	9.90039e-48
Lrrtm4	6.1134e-52	0.346571	0.997	0.989	1.5547e-47
Gpc6	1.13936e-51	0.440931	0.747	0.529	2.89751e-47
Fbxl17	2.6017e-51	0.323415	0.95	0.895	6.61638e-47
Acvrl1	8.45768e-51	-0.275893	0.092	0.264	2.15087e-46
Tnrc6b	1.22813e-50	0.322135	0.93	0.853	3.12327e-46
Nell2	1.35741e-50	0.331446	0.928	0.851	3.45203e-46
Cacna1d	1.42854e-50	0.311297	0.965	0.919	3.63291e-46
Dennd1a	2.03483e-50	0.296361	0.971	0.928	5.17477e-46
Sobp	2.14121e-50	0.344125	0.419	0.212	5.44532e-46
Ier5l	2.92115e-50	-0.288374	0.189	0.39	7.42877e-46
Greb1l	3.14973e-50	0.319606	0.367	0.167	8.01007e-46
Rasd2	4.81599e-50	-0.339902	0.338	0.543	1.22475e-45
Tmod1	5.29702e-50	-0.348067	0.35	0.555	1.34709e-45
Gm1043	5.32195e-50	-0.349911	0.526	0.709	1.35343e-45
Tpm1	6.23894e-50	-0.408326	0.681	0.82	1.58663e-45
Alcam	7.76314e-50	-0.355154	0.979	0.987	1.97425e-45
Bcl11b	1.0577e-49	-0.33119	0.908	0.964	2.68983e-45
Ano4	1.42742e-49	0.348061	0.48	0.267	3.63007e-45
Parp8	1.83615e-49	0.338636	0.498	0.287	4.6695e-45
Gm42418	2.26321e-49	-0.50796	1	1	5.75557e-45
Sik3	2.61073e-49	-0.382096	0.841	0.915	6.63934e-45
Xkr4	2.69755e-49	0.306755	0.989	0.964	6.86014e-45
Vsnl1	3.02354e-49	0.320697	0.424	0.212	7.68916e-45
Cipc	5.10657e-49	-0.338229	0.425	0.622	1.29865e-44
Stxbp6	5.49774e-49	0.392481	0.425	0.217	1.39813e-44
Slc8a2	8.8968e-49	-0.319032	0.363	0.574	2.26254e-44
Fubp1	9.08146e-49	0.298973	0.925	0.87	2.3095e-44
Fign	1.08868e-48	0.29636	0.307	0.124	2.76863e-44
Rerg	1.20442e-48	-0.366254	0.302	0.506	3.06296e-44
Gprasp2	1.58937e-48	0.305366	0.426	0.227	4.04193e-44
Stxbp5l	1.59508e-48	0.293925	0.989	0.975	4.05645e-44
Hlf	2.17531e-48	-0.339005	0.373	0.573	5.53204e-44
Ppp2r3a	2.98824e-48	0.362708	0.633	0.446	7.59938e-44
Spry2	3.03358e-48	-0.350662	0.31	0.505	7.71468e-44
Per3	6.79205e-48	-0.301532	0.244	0.45	1.72729e-43
Tmem191c	7.36659e-48	-0.336815	0.736	0.868	1.8734e-43
Zfp618	7.81893e-48	0.273216	0.293	0.115	1.98843e-43
Cxxc4	7.85299e-48	0.302163	0.521	0.31	1.99709e-43
Ssr4	9.08422e-48	0.334147	0.619	0.42	2.31021e-43
Magi1	9.96485e-48	0.335047	0.764	0.604	2.53416e-43
Tenm1	1.09954e-47	0.35907	0.81	0.641	2.79624e-43
Fmnl2	1.39191e-47	0.29551	0.253	0.088	3.53978e-43
Rarb	1.45626e-47	-0.262314	0.998	1	3.7034e-43
Ccnl1	2.01698e-47	0.317591	0.755	0.593	5.12937e-43
Ehbp1	2.32303e-47	0.32782	0.827	0.713	5.9077e-43
Tcf4	4.61334e-47	0.352059	0.497	0.293	1.17322e-42
Ptk2b	5.42249e-47	-0.316018	0.673	0.821	1.37899e-42
Gm45323	6.25412e-47	0.340223	0.269	0.098	1.59049e-42
Foxn3	6.98795e-47	0.345623	0.426	0.231	1.77711e-42
Krt12	7.79561e-47	0.3087	0.458	0.249	1.9825e-42
Camk2d	1.13393e-46	0.272466	0.308	0.121	2.88369e-42
Stk3	2.11452e-46	0.305177	0.373	0.181	5.37744e-42
Slc22a17	2.23604e-46	0.339001	0.904	0.825	5.68648e-42
Pabpn1	2.624e-46	0.324926	0.808	0.662	6.67309e-42
Pitpnm2	3.11473e-46	-0.329177	0.391	0.583	7.92107e-42
Rps6ka5	4.78993e-46	-0.379051	0.679	0.826	1.21813e-41
Cdk17	6.52418e-46	-0.308776	0.869	0.943	1.65916e-41
Dcx	8.77644e-46	0.296253	0.406	0.21	2.23194e-41
Arel1	9.54239e-46	-0.348168	0.481	0.652	2.42673e-41
Samd5	1.24951e-45	-0.407918	0.649	0.775	3.17763e-41
Nin	1.37714e-45	-0.321441	0.725	0.857	3.50221e-41
Inka2	1.7396e-45	-0.281853	0.223	0.417	4.42398e-41
Coch	2.38264e-45	-0.34212	0.22	0.407	6.0593e-41
Pnisr	2.68415e-45	0.269496	0.991	0.967	6.82606e-41
Srrt	3.51799e-45	-0.329558	0.395	0.579	8.9466e-41
Ccdc58	4.12431e-45	0.325462	0.543	0.348	1.04885e-40
Svil	4.24454e-45	-0.290669	0.152	0.332	1.07943e-40
Id4	4.49947e-45	-0.313935	0.223	0.413	1.14426e-40
Sox8	4.55516e-45	-0.328445	0.246	0.436	1.15842e-40
Mast3	9.39799e-45	-0.316897	0.412	0.607	2.39e-40
Nrg3os	1.0654e-44	0.360826	0.85	0.71	2.70943e-40
Zbtb20	1.33803e-44	0.347496	0.952	0.849	3.40274e-40
Gnb5	1.51283e-44	-0.332588	0.592	0.747	3.84729e-40
Ddx39b	1.53645e-44	0.316719	0.667	0.498	3.90735e-40
Sh3bgrl	1.74823e-44	0.278055	0.325	0.146	4.44593e-40
Gm32647	1.93781e-44	0.55748	0.559	0.361	4.92805e-40
Gabrb2	2.30061e-44	0.326082	0.923	0.85	5.85067e-40
Coq10b	2.54393e-44	-0.380457	0.266	0.45	6.46946e-40
Gm36756	2.58023e-44	-0.284081	0.227	0.418	6.56179e-40
Prkdc	4.78245e-44	0.315435	0.543	0.346	1.21622e-39
Ivns1abp	6.72444e-44	-0.389624	0.711	0.812	1.71009e-39
Mapk10	8.40744e-44	0.303006	0.958	0.918	2.1381e-39
Atp1b1	9.11645e-44	0.270095	0.967	0.939	2.31841e-39
Gnal	1.32223e-43	-0.255448	0.991	0.997	3.36257e-39
Camk1d	2.38045e-43	-0.284526	0.963	0.986	6.05372e-39
Gkap1	2.55073e-43	0.274718	0.355	0.169	6.48676e-39
Ndfip2	3.05271e-43	-0.397678	0.76	0.846	7.76335e-39
Foxo1	4.31556e-43	-0.396158	0.512	0.673	1.09749e-38
9630028H03Rik	5.74776e-43	-0.402945	0.777	0.869	1.46171e-38
BC005561	6.86407e-43	0.333307	0.709	0.556	1.7456e-38
Tmem165	9.92021e-43	0.31929	0.572	0.388	2.52281e-38
Tef	1.10928e-42	-0.297578	0.553	0.719	2.82101e-38
Sv2c	2.3668e-42	-0.342384	0.656	0.806	6.01902e-38
Sorcs2	2.50469e-42	-0.380204	0.488	0.665	6.36967e-38
Ngef	2.6968e-42	-0.321321	0.697	0.834	6.85823e-38
Eml6	2.75211e-42	0.312973	0.903	0.819	6.99888e-38
Rpgr	3.47692e-42	0.323989	0.717	0.568	8.84215e-38
Larp1b	4.87845e-42	0.276087	0.347	0.168	1.24064e-37
Chuk	9.76143e-42	0.319941	0.701	0.555	2.48243e-37
St7	1.00083e-41	0.31794	0.689	0.532	2.54522e-37
Rgs4	1.01872e-41	-0.35304	0.359	0.533	2.59071e-37
H3f3b	1.06552e-41	0.330673	0.72	0.565	2.70972e-37
Junb	1.27308e-41	-0.625179	0.298	0.475	3.23756e-37
Zfp207	1.56966e-41	0.299866	0.779	0.666	3.99181e-37
A330008L17Rik	2.01249e-41	-0.463318	0.378	0.547	5.11797e-37
Exd2	2.25788e-41	0.282635	0.521	0.328	5.74202e-37
Gm45321	2.77499e-41	0.284989	0.28	0.111	7.05707e-37
Ap1s1	4.25297e-41	-0.31673	0.441	0.619	1.08157e-36
Tbc1d4	4.30778e-41	-0.319293	0.241	0.426	1.09551e-36
Gnaq	4.77181e-41	0.301495	0.813	0.702	1.21352e-36
Ly6h	9.24179e-41	0.323728	0.877	0.757	2.35028e-36
Gipc2	1.46419e-40	-0.356952	0.355	0.529	3.72357e-36
Camk2a	2.23413e-40	-0.280942	0.934	0.977	5.68162e-36
Cog5	2.56314e-40	0.307897	0.767	0.629	6.51832e-36
Faim2	2.97709e-40	0.304541	0.486	0.306	7.57103e-36
Mir124-2hg	3.19662e-40	0.323463	0.67	0.509	8.12933e-36
Zmym4	4.19582e-40	0.30175	0.83	0.73	1.06704e-35
Klhdc10	5.41704e-40	0.308099	0.75	0.622	1.37761e-35
Chd3	7.01421e-40	0.310615	0.739	0.604	1.78378e-35
Cst3	7.8738e-40	0.350049	0.735	0.589	2.00239e-35
Lims1	8.55515e-40	0.277354	0.376	0.197	2.17566e-35
Sh3rf2	8.88678e-40	-0.409451	0.519	0.669	2.26e-35
Fgd4	9.7212e-40	0.265891	0.361	0.181	2.4722e-35
Elk3	1.10839e-39	-0.253115	0.17	0.341	2.81875e-35
Lynx1	1.58552e-39	-0.293808	0.318	0.502	4.03213e-35
Mpp6	1.95867e-39	-0.314829	0.657	0.808	4.9811e-35
Wsb1	1.98391e-39	0.291325	0.55	0.364	5.04529e-35
Elavl2	2.21514e-39	0.268313	0.289	0.126	5.63333e-35
Rgs20	2.54153e-39	-0.373356	0.798	0.882	6.46337e-35
Thbs3	3.00414e-39	-0.252909	0.149	0.313	7.63982e-35
Zfp706	4.03463e-39	-0.28083	0.293	0.478	1.02605e-34
Tmem181a	5.42353e-39	0.295846	0.739	0.602	1.37926e-34
Lrrc10b	6.42232e-39	-0.265787	0.235	0.417	1.63326e-34
Sbf2	7.70231e-39	0.272688	0.91	0.856	1.95877e-34
Mcu	7.95978e-39	0.313638	0.708	0.555	2.02425e-34
Gm15813	7.97843e-39	-0.266762	0.284	0.47	2.02899e-34
Ildr2	8.91259e-39	0.278313	0.37	0.194	2.26656e-34
B830012L14Rik	1.05965e-38	0.323697	0.764	0.642	2.69481e-34
Cadps	1.07116e-38	0.276711	0.975	0.935	2.72407e-34
Ncor1	1.7115e-38	0.278951	0.909	0.841	4.35251e-34
Iqgap2	1.92613e-38	-0.312345	0.264	0.443	4.89835e-34
Cdc42ep3	1.9497e-38	-0.336897	0.447	0.604	4.95828e-34
Efr3b	2.41114e-38	-0.314081	0.558	0.714	6.13177e-34
Gm16105	3.35002e-38	-0.278944	0.354	0.537	8.51945e-34
Rnf207	4.05967e-38	-0.289428	0.381	0.563	1.03242e-33
Cntnap5a	4.062e-38	0.282428	0.971	0.896	1.03301e-33
Cd81	4.08827e-38	0.320792	0.496	0.325	1.03969e-33
Pou6f2	5.93366e-38	0.3948	0.522	0.34	1.50899e-33
Slc24a3	6.57318e-38	0.363467	0.587	0.419	1.67163e-33
Tnr	2.0157e-37	0.275656	0.868	0.772	5.12612e-33
Lin28b	2.54797e-37	0.325422	0.747	0.629	6.47974e-33
Gcnt2	2.61538e-37	-0.350398	0.477	0.63	6.65118e-33
Ypel2	2.83612e-37	-0.306123	0.687	0.815	7.21254e-33
Ntrk2	3.35345e-37	-0.42713	0.842	0.886	8.52816e-33
Gm15680	3.54472e-37	-0.332629	0.262	0.434	9.01458e-33
Gm26871	5.57086e-37	0.253706	0.97	0.922	1.41673e-32
Coq3	6.17107e-37	0.2708	0.433	0.256	1.56936e-32
Gm48003	6.29993e-37	-0.32307	0.53	0.683	1.60214e-32
Tenm3	7.83221e-37	0.412999	0.881	0.803	1.99181e-32
Slc25a13	8.44433e-37	0.268905	0.403	0.227	2.14748e-32
Gm26542	1.05194e-36	-0.282964	0.248	0.421	2.67519e-32
Epha6	1.64336e-36	0.254777	0.999	0.99	4.17922e-32
Slc44a5	1.68991e-36	0.296252	0.523	0.342	4.29761e-32
Pcdh10	2.08207e-36	0.304288	0.778	0.633	5.29492e-32
Prpf4b	2.25078e-36	0.256849	0.953	0.907	5.72396e-32
Dhx36	2.4673e-36	0.280847	0.787	0.671	6.27459e-32
Gm2516	2.48725e-36	0.282928	0.283	0.126	6.32533e-32
Spata16	2.97191e-36	-0.334786	0.123	0.271	7.55786e-32
Strn3	3.67055e-36	0.251156	0.934	0.89	9.33457e-32
Cplx2	4.3127e-36	-0.299768	0.661	0.785	1.09676e-31
Arid3b	4.94731e-36	-0.258476	0.216	0.387	1.25815e-31
Neto1	4.99552e-36	-0.306016	0.941	0.964	1.27041e-31
Gm27032	8.00646e-36	0.307866	0.758	0.642	2.03612e-31
Bcas3	9.66908e-36	0.290284	0.857	0.782	2.45894e-31
Mn1	1.12841e-35	-0.251687	0.179	0.339	2.86966e-31
Fam135b	1.14599e-35	0.303965	0.831	0.728	2.91436e-31
Tcaf1	1.15347e-35	-0.317741	0.659	0.797	2.93339e-31
L3mbtl3	1.20974e-35	0.313517	0.426	0.252	3.07648e-31
Psd	1.24871e-35	-0.252239	0.283	0.456	3.1756e-31
Bbs9	1.44357e-35	-0.279703	0.43	0.607	3.67114e-31
Slc24a4	1.63122e-35	-0.31768	0.509	0.657	4.14836e-31
Gm38413	1.91656e-35	-0.267906	0.376	0.548	4.87401e-31
Zfhx3	2.59721e-35	0.398065	0.734	0.598	6.60498e-31
Tmem91	2.67493e-35	0.308006	0.748	0.611	6.80261e-31
Uri1	2.80821e-35	0.28161	0.667	0.522	7.14155e-31
Stmn3	3.41039e-35	0.316711	0.831	0.738	8.67296e-31
1110051M20Rik	3.4564e-35	0.273522	0.812	0.715	8.78997e-31
Gm1604a	4.09797e-35	-0.293238	0.537	0.679	1.04215e-30
Slc38a2	4.95682e-35	-0.271645	0.335	0.513	1.26057e-30
Rabac1	5.46449e-35	0.320823	0.69	0.555	1.38967e-30
Paxbp1	5.52374e-35	0.266316	0.885	0.817	1.40474e-30
Osbp2	5.85068e-35	-0.303316	0.724	0.838	1.48789e-30
Trpc6	6.36866e-35	-0.272468	0.139	0.287	1.61961e-30
Arhgap32	7.09836e-35	-0.301177	0.806	0.901	1.80519e-30
Limk2	7.22651e-35	0.265296	0.475	0.304	1.83777e-30
Hcn1	8.28103e-35	0.280916	0.525	0.349	2.10595e-30
Atp1a1	8.30917e-35	-0.289905	0.402	0.572	2.11311e-30
Bbx	8.58091e-35	0.293968	0.675	0.534	2.18221e-30
Hjurp	8.86735e-35	0.277819	0.473	0.306	2.25506e-30
Snrnp48	1.10856e-34	0.271373	0.689	0.539	2.81917e-30
Eef1a1	1.15667e-34	0.286688	0.81	0.712	2.94154e-30
Prkd1	1.31175e-34	-0.418131	0.515	0.661	3.33591e-30
Leng8	1.45977e-34	0.282445	0.692	0.555	3.71235e-30
C2cd2	1.46923e-34	-0.365954	0.379	0.541	3.73641e-30
Tra2a	2.01007e-34	0.25789	0.915	0.839	5.1118e-30
Khdrbs2	2.24076e-34	0.336839	0.658	0.496	5.69848e-30
Cdh9	2.3118e-34	-0.440291	0.762	0.833	5.87914e-30
Mast2	2.52405e-34	0.277407	0.519	0.35	6.41891e-30
Rassf8	2.54961e-34	-0.306807	0.566	0.713	6.48391e-30
Sez6	2.59646e-34	-0.298489	0.626	0.759	6.60306e-30
Fndc9	2.87246e-34	-0.30754	0.536	0.673	7.30494e-30
Astn2	3.97644e-34	0.279767	0.603	0.428	1.01125e-29
Gm2164	4.21355e-34	-0.409159	0.445	0.591	1.07155e-29
Pde1a	4.91695e-34	0.27346	0.339	0.169	1.25043e-29
Unc13b	5.4944e-34	0.26037	0.387	0.222	1.39728e-29
Acyp2	5.52786e-34	0.329249	0.689	0.555	1.40579e-29
Gsk3b	5.84955e-34	-0.271435	0.86	0.925	1.4876e-29
A730090N16Rik	7.74198e-34	-0.257113	0.262	0.428	1.96886e-29
Dnajc6	8.09609e-34	0.280883	0.808	0.688	2.05892e-29
Cdh10	1.05095e-33	0.304638	0.7	0.534	2.67267e-29
Ppia	1.11272e-33	0.318449	0.909	0.861	2.82975e-29
Npat	1.43435e-33	0.2604	0.462	0.293	3.6477e-29
Dynll1	1.53509e-33	-0.283601	0.565	0.721	3.9039e-29
Mtf2	2.08161e-33	0.271279	0.811	0.698	5.29374e-29
5730522E02Rik	2.37613e-33	0.259377	0.983	0.972	6.04272e-29
Mink1	2.61023e-33	-0.260835	0.637	0.789	6.63808e-29
Deptor	2.93904e-33	-0.265058	0.16	0.312	7.47426e-29
Garnl3	6.36898e-33	0.304555	0.683	0.54	1.6197e-28
Cep128	6.73844e-33	-0.309786	0.324	0.49	1.71365e-28
Fnbp1l	6.76877e-33	-0.257723	0.92	0.964	1.72137e-28
Cap1	7.21436e-33	-0.321264	0.473	0.609	1.83468e-28
Cacng3	9.72612e-33	-0.299153	0.68	0.796	2.47345e-28
Hras	1.0135e-32	-0.284443	0.448	0.611	2.57742e-28
Scn1a	1.01454e-32	0.251328	0.937	0.883	2.58007e-28
Pdp1	1.08423e-32	-0.284064	0.269	0.429	2.7573e-28
Ncoa2	1.2367e-32	0.276831	0.807	0.707	3.14504e-28
Hspa8	1.33424e-32	0.298221	0.833	0.743	3.3931e-28
Lgi1	1.75505e-32	0.275804	0.74	0.611	4.46327e-28
Itgav	2.53944e-32	0.295277	0.635	0.477	6.45806e-28
Zfhx4	2.54912e-32	0.260324	0.556	0.385	6.48266e-28
Rit2	3.58046e-32	0.271645	0.904	0.846	9.10547e-28
Brinp3	3.7258e-32	0.586993	0.639	0.525	9.47509e-28
Gm10115	3.79912e-32	-0.26536	0.333	0.496	9.66153e-28
Ptms	5.12682e-32	-0.251741	0.59	0.743	1.3038e-27
Xpo4	5.54333e-32	0.252375	0.485	0.32	1.40973e-27
Htr2c	5.72825e-32	0.336127	0.866	0.807	1.45675e-27
Gm15594	6.66963e-32	-0.273694	0.347	0.504	1.69615e-27
Fam172a	1.10152e-31	0.268004	0.879	0.817	2.80127e-27
Kctd17	1.18186e-31	-0.342831	0.525	0.653	3.00558e-27
Spata13	1.46207e-31	-0.252559	0.245	0.405	3.71819e-27
Thy1	2.54942e-31	0.278421	0.653	0.505	6.48342e-27
Eif4g3	2.95204e-31	0.272479	0.789	0.71	7.50734e-27
Trim9	3.65149e-31	-0.29719	0.72	0.827	9.28611e-27
Gabra1	4.11428e-31	0.270165	0.535	0.378	1.0463e-26
Cyfip2	4.29911e-31	-0.253341	0.706	0.818	1.09331e-26
Celf1	5.69606e-31	-0.255711	0.896	0.95	1.44856e-26
Jak2	6.38494e-31	-0.27898	0.404	0.554	1.62375e-26
2210408I21Rik	7.80044e-31	0.301981	0.734	0.608	1.98373e-26
Fstl4	8.45389e-31	-0.293062	0.792	0.88	2.14991e-26
Adcy9	9.6595e-31	-0.263859	0.594	0.735	2.45651e-26
Pcp4l1	1.08831e-30	-0.279604	0.43	0.583	2.76769e-26
Rgs2	1.1021e-30	-0.310632	0.248	0.398	2.80274e-26
Bcl11a	1.31832e-30	0.250143	0.845	0.747	3.35263e-26
Snrpn	1.35643e-30	0.257971	0.871	0.801	3.44954e-26
Sec61a2	1.3683e-30	0.261523	0.66	0.529	3.47973e-26
Ptprz1	1.46829e-30	0.311909	0.421	0.266	3.73401e-26
Egr1	1.66975e-30	-0.309809	0.259	0.412	4.24634e-26
Hivep3	1.71312e-30	0.279922	0.727	0.604	4.35663e-26
Lmbr1	1.85828e-30	0.260872	0.544	0.379	4.72579e-26
Kcnt1	1.89412e-30	-0.253047	0.687	0.814	4.81695e-26
Mnat1	1.9279e-30	0.265705	0.617	0.475	4.90284e-26
Tmem130	2.12945e-30	0.271188	0.566	0.403	5.4154e-26
Chm	2.13618e-30	0.261168	0.665	0.536	5.43252e-26
Gm30382	2.32339e-30	0.341465	0.609	0.45	5.9086e-26
Uty	3.22071e-30	0.273278	0.726	0.604	8.19058e-26
Sort1	3.74833e-30	-0.265715	0.535	0.684	9.53237e-26
Myef2	3.92063e-30	0.259122	0.798	0.701	9.97056e-26
Jcad	6.17303e-30	-0.294381	0.456	0.597	1.56986e-25
Gbf1	7.20138e-30	0.269128	0.723	0.597	1.83138e-25
Dlgap3	8.1628e-30	-0.257144	0.656	0.768	2.07588e-25
Car11	9.66853e-30	-0.257735	0.655	0.781	2.4588e-25
Kif26b	1.12861e-29	0.264519	0.662	0.517	2.87016e-25
Letm2	1.35319e-29	0.263376	0.581	0.435	3.4413e-25
Pcca	1.38861e-29	0.26429	0.739	0.628	3.53137e-25
Gm13974	1.88693e-29	-0.361722	0.248	0.392	4.79866e-25
Nlk	2.1288e-29	0.257452	0.865	0.806	5.41376e-25
Zdhhc14	2.90164e-29	-0.281381	0.827	0.895	7.37916e-25
Synpo2	3.17511e-29	-0.26485	0.184	0.329	8.07461e-25
Rsrc1	3.20293e-29	0.276533	0.737	0.631	8.14537e-25
Egr3	4.22388e-29	-0.267357	0.123	0.251	1.07418e-24
Ccdc85a	4.28164e-29	0.284574	0.562	0.403	1.08886e-24
Gtdc1	5.07859e-29	0.282102	0.666	0.535	1.29154e-24
Ranbp17	5.89284e-29	0.291301	0.694	0.581	1.49861e-24
2610037D02Rik	6.75963e-29	0.26131	0.612	0.466	1.71904e-24
Dgkg	1.2696e-28	0.250981	0.503	0.339	3.22873e-24
Ntng1	1.92733e-28	0.308826	0.422	0.263	4.9014e-24
Pkig	1.95505e-28	-0.26046	0.582	0.717	4.97189e-24
Cdh12	2.40179e-28	0.354502	0.674	0.535	6.108e-24
Acat1	2.50867e-28	0.259497	0.649	0.522	6.3798e-24
Magi3	5.92416e-28	0.261473	0.551	0.402	1.50657e-23
Ramp1	5.99094e-28	-0.260691	0.506	0.646	1.52356e-23
Eif4a2	6.01149e-28	0.264048	0.66	0.541	1.52878e-23
Ankrd33b	7.21678e-28	-0.280093	0.515	0.641	1.8353e-23
Vstm2a	1.16413e-27	0.274271	0.558	0.403	2.9605e-23
Pde4a	1.27842e-27	-0.258732	0.411	0.554	3.25115e-23
Smyd3	1.65482e-27	-0.253675	0.916	0.956	4.20837e-23
Adarb2	1.74321e-27	0.401026	0.658	0.544	4.43315e-23
Rnf112	2.07631e-27	-0.251246	0.536	0.673	5.28026e-23
Fam189a1	2.43217e-27	-0.26233	0.568	0.714	6.18525e-23
4930415C11Rik	2.51457e-27	-0.396108	0.298	0.429	6.3948e-23
Pde4d	2.85252e-27	0.391563	0.426	0.284	7.25424e-23
Calm1	3.13559e-27	-0.282213	0.932	0.972	7.97411e-23
Klhl2	3.3273e-27	-0.280785	0.784	0.856	8.46166e-23
Snhg20	4.03592e-27	0.25378	0.667	0.538	1.02638e-22
Myo16	4.1874e-27	0.259848	0.523	0.371	1.0649e-22
Garem1	1.06008e-26	-0.306425	0.586	0.711	2.69588e-22
Csf2ra	1.18715e-26	0.250928	0.565	0.424	3.01903e-22
4930567K20Rik	1.56408e-26	-0.275114	0.27	0.41	3.97762e-22
Kcnh7	1.61695e-26	0.32534	0.773	0.642	4.11206e-22
Supt20	1.93669e-26	0.253787	0.693	0.58	4.92519e-22
Sesn3	1.94295e-26	-0.252925	0.704	0.8	4.94112e-22
Cntnap5b	2.13226e-26	0.294787	0.81	0.732	5.42256e-22
Nexmif	2.62708e-26	0.25652	0.565	0.412	6.68092e-22
Nr6a1	3.26454e-26	0.254335	0.758	0.647	8.30204e-22
Galntl6	3.32448e-26	0.253963	0.985	0.96	8.45448e-22
Fam173a	5.41764e-26	0.261239	0.612	0.491	1.37776e-21
Pbx3	5.9743e-26	0.275461	0.911	0.831	1.51932e-21
Ano2	6.35542e-26	-0.293671	0.458	0.598	1.61625e-21
Upp2	1.23506e-25	0.275141	0.829	0.766	3.14087e-21
Rimbp2	1.35829e-25	0.257726	0.726	0.618	3.45427e-21
Adgrl2	1.5607e-25	0.270265	0.825	0.756	3.96903e-21
Efna5	1.899e-25	0.327302	0.67	0.537	4.82935e-21
Ext1	2.15051e-25	0.254478	0.758	0.655	5.46897e-21
Tgfa	2.92226e-25	-0.250277	0.494	0.624	7.43161e-21
Edil3	5.91678e-25	0.286498	0.657	0.513	1.5047e-20
Sik2	7.46573e-25	-0.328385	0.549	0.66	1.89861e-20
Crym	1.06057e-24	-0.263648	0.154	0.277	2.69714e-20
Kdm3a	1.32986e-24	-0.271989	0.451	0.573	3.38198e-20
Kcnn2	1.38152e-24	0.278622	0.629	0.512	3.51334e-20
Tbc1d30	1.75674e-24	-0.265687	0.377	0.507	4.46758e-20
4930428E07Rik	2.31634e-24	-0.300709	0.425	0.54	5.89069e-20
Oxr1	2.7448e-24	0.261472	0.562	0.427	6.9803e-20
Kdm7a	3.95215e-24	-0.287485	0.464	0.587	1.00507e-19
St6galnac5	9.6007e-24	-0.255293	0.646	0.774	2.44155e-19
Cdh4	1.4952e-23	-0.298731	0.157	0.283	3.80245e-19
Kcnk2	4.82425e-23	-0.419036	0.7	0.766	1.22685e-18
Mlip	6.47648e-23	0.250297	0.525	0.386	1.64703e-18
Peli1	3.94912e-22	-0.27728	0.425	0.545	1.0043e-17
Gpr88	5.82718e-22	-0.270037	0.63	0.739	1.48191e-17
Elp4	1.41922e-21	0.251299	0.685	0.588	3.60923e-17
Chgb	1.22224e-20	-0.250804	0.351	0.475	3.10828e-16
Thsd7a	1.92689e-20	-0.26212	0.929	0.942	4.90027e-16
Ripor2	7.94172e-20	-0.257069	0.765	0.845	2.01966e-15
Klhl1	9.57008e-20	0.256993	0.634	0.502	2.43377e-15
Acvr1c	1.66209e-19	-0.267604	0.502	0.599	4.22686e-15
Egfem1	1.17953e-17	-0.362078	0.684	0.792	2.99967e-13
Mme	8.29368e-17	-0.257544	0.388	0.487	2.10916e-12
Nnat	8.75141e-17	-0.425273	0.362	0.467	2.22557e-12
Srgap1	6.90103e-16	-0.252767	0.794	0.846	1.755e-11
Unc13c	5.00619e-15	-0.327107	0.882	0.892	1.27312e-10
Erbb4	2.60092e-12	0.251864	0.578	0.471	6.61439e-08
Gpr155	9.97547e-11	-0.318192	0.566	0.607	2.53686e-06
Plcxd3	1.68857e-10	-0.25254	0.187	0.26	4.29421e-06
Ccnd2	1.01385e-09	-0.258776	0.376	0.432	2.57831e-05
Trpm3	1.8858e-08	-0.367751	0.434	0.499	0.000479577
Cntn3	0.00014553	-0.29068	0.763	0.742	1

## Sheet: thiamine_cluster1R61thiaminevsN
Column1	p_val	avg_log2FC	pct.1	pct.2	p_val_adj
Cmss1	8.28278e-200	-0.826789	0.999	1	2.10639e-195
AY036118	8.08139e-101	-0.560885	1	1	2.05518e-96
Gm42418	1.99005e-97	-0.447326	1	1	5.06089e-93
Penk	2.39536e-88	-0.79342	0.156	0.491	6.09163e-84
Pcp4	3.80274e-87	-0.73	0.846	0.943	9.67075e-83
Tmeff2	5.63396e-64	0.468866	1	1	1.43277e-59
Anks1b	6.02844e-61	0.499281	1	0.996	1.53309e-56
Adipor2	1.54383e-55	-0.698856	0.484	0.691	3.92612e-51
Camk1d	2.45332e-54	-0.471177	0.955	0.991	6.23903e-50
Arpp21	2.62673e-47	-0.456009	0.923	0.955	6.68005e-43
Cdk8	7.26776e-44	-0.425732	0.892	0.953	1.84827e-39
A330015K06Rik	4.38152e-41	-0.476012	0.894	0.953	1.11426e-36
Nrgn	8.2301e-39	-0.457682	0.853	0.921	2.093e-34
Sgk1	6.04257e-37	-0.529385	0.219	0.408	1.53668e-32
Fbxw15	5.27059e-32	-0.485781	0.1	0.266	1.34036e-27
Gstp1	2.85954e-31	0.547845	0.623	0.475	7.27209e-27
Gm44866	4.26771e-31	-0.416522	0.095	0.261	1.08532e-26
Kcnab1	2.93551e-30	-0.38043	0.951	0.973	7.4653e-26
Ppp1r1b	4.00288e-30	-0.422835	0.117	0.286	1.01797e-25
Gm10863	2.91014e-29	0.410463	0.503	0.321	7.40077e-25
Pde10a	6.74954e-29	-0.335443	0.934	0.959	1.71648e-24
Gm36855	1.41434e-28	-0.441086	0.116	0.281	3.5968e-24
Ctnna3	2.03845e-27	-0.395814	0.985	0.993	5.18399e-23
Kctd13	4.62411e-27	-0.410509	0.574	0.705	1.17596e-22
Calm2	2.21565e-26	-0.333369	0.976	0.987	5.63462e-22
Lama2	9.99734e-26	-0.447682	0.322	0.499	2.54242e-21
Gm42756	1.13361e-24	-0.382609	0.108	0.252	2.88287e-20
Grm7	1.51849e-24	-0.573724	0.976	0.981	3.86168e-20
Mat2a	9.58154e-24	-0.368129	0.557	0.694	2.43668e-19
Nap1l5	9.92421e-24	0.364396	0.534	0.366	2.52383e-19
Wls	2.14823e-23	0.358396	0.51	0.339	5.46316e-19
Lrrtm3	1.69783e-22	-0.398347	0.949	0.971	4.31776e-18
Tmod2	1.01553e-21	-0.378204	0.562	0.699	2.58258e-17
Tmsb4x	3.29875e-21	-0.340504	0.885	0.929	8.38905e-17
Slc38a2	5.84527e-21	-0.36864	0.629	0.748	1.48651e-16
Pacrg	8.69668e-21	-0.363436	0.789	0.873	2.21165e-16
Sytl2	8.65488e-20	0.335787	0.791	0.677	2.20102e-15
Dynll1	1.83656e-19	-0.373073	0.282	0.424	4.67056e-15
Meg3	2.41139e-19	0.287322	0.986	0.986	6.1324e-15
Atp2b1	2.73613e-19	-0.27061	0.976	0.981	6.95825e-15
Neat1	5.62801e-19	0.281578	0.96	0.927	1.43126e-14
Arpp19	5.9084e-19	-0.335544	0.253	0.403	1.50256e-14
Gm4221	6.12451e-18	0.33094	0.413	0.276	1.55752e-13
Mdga2	1.4525e-17	0.254047	0.998	0.999	3.69385e-13
Camk2n1	6.12698e-17	-0.314932	0.165	0.291	1.55815e-12
Sez6l2	8.5969e-17	-0.348286	0.454	0.57	2.18628e-12
Snhg11	1.68742e-16	0.273695	0.987	0.978	4.29127e-12
Trf	2.46769e-16	0.257632	0.996	0.992	6.27558e-12
Rnf220	4.93605e-16	0.253109	0.99	0.973	1.25529e-11
March1	1.69588e-15	0.314109	0.945	0.929	4.3128e-11
Tnfaip6	5.88422e-15	-0.314193	0.446	0.557	1.49641e-10
Rap1a	3.44475e-14	0.269021	0.757	0.648	8.76034e-10
Bcl2l1	1.49682e-13	-0.290355	0.397	0.51	3.80658e-09
Gm816	1.00743e-12	-0.284505	0.15	0.255	2.56199e-08
Mettl7a1	1.39751e-12	-0.275875	0.329	0.441	3.55402e-08
Pakap	5.71322e-12	-0.267506	0.62	0.717	1.45293e-07
Dbi	6.4935e-12	-0.296782	0.687	0.749	1.65136e-07
Zfp608	3.01111e-11	0.253872	0.52	0.404	7.65755e-07
Ppp1cc	6.55895e-11	-0.273578	0.301	0.404	1.66801e-06
Abca8a	5.27047e-10	-0.274259	0.229	0.325	1.34033e-05
Gm37459	2.12652e-09	-0.265725	0.396	0.483	5.40795e-05
Glul	1.63234e-08	-0.254268	0.581	0.648	0.000415121
9330111N05Rik	4.15564e-05	-0.274121	0.288	0.354	1

## Sheet: thiamine_cluster2R61thiaminevsN
Column1	p_val	avg_log2FC	pct.1	pct.2	p_val_adj
Celf2	0	-0.51205	1	1	0
Penk	0	-1.75286	0.867	0.985	0
Rgs9	0	-1.05269	0.935	0.982	0
Meg3	0	0.751084	1	1	0
Pde10a	0	-1.06841	0.999	0.997	0
Malat1	0	-0.60114	1	1	0
Phactr1	9.22529e-279	-0.613694	1	1	2.34608e-274
AC149090.1	1.94525e-273	-1.08745	0.827	0.988	4.94696e-269
Adcy5	6.53421e-241	-0.871658	0.865	0.975	1.66171e-236
Sfmbt2	1.62898e-235	0.807644	0.564	0.065	4.14266e-231
Dclk1	9.6683e-209	-0.768672	0.919	0.99	2.45875e-204
Cmss1	6.68883e-199	-0.691063	0.985	0.998	1.70104e-194
Frmd4a	2.97869e-197	0.813148	0.977	0.889	7.5751e-193
Ogt	2.10744e-190	0.698841	0.981	0.884	5.35943e-186
Mhrt	3.50437e-187	-0.929815	0.193	0.636	8.91195e-183
Pcp4	7.50102e-183	-1.00656	0.761	0.944	1.90758e-178
Arpp19	3.28708e-181	-0.845267	0.606	0.885	8.35937e-177
Ddx5	1.11516e-178	0.561622	1	0.996	2.83597e-174
Magi2	2.66015e-172	0.52539	1	0.997	6.76502e-168
Homer1	8.22955e-170	-0.950698	0.746	0.93	2.09286e-165
Arpp21	2.81585e-169	-0.498095	0.996	1	7.16099e-165
Robo1	4.72346e-165	0.610987	0.999	0.984	1.20122e-160
Osbpl8	6.83219e-165	-0.719562	0.921	0.985	1.73749e-160
Rap1gap	6.85554e-164	-0.777892	0.667	0.883	1.74343e-159
Gm10754	1.89913e-163	-0.950935	0.772	0.919	4.82968e-159
Rian	2.52038e-162	0.587513	0.997	0.968	6.40958e-158
Mgat4c	7.02153e-159	0.744096	0.983	0.95	1.78564e-154
Ror1	9.22454e-157	-0.783566	0.094	0.489	2.34589e-152
Cacnb2	1.27485e-153	-0.709001	0.998	1	3.24207e-149
Ppp3ca	4.46224e-152	-0.437429	1	1	1.13479e-147
Camk4	4.831e-150	-0.645871	0.959	0.989	1.22857e-145
Rhobtb2	1.07801e-149	-0.752462	0.439	0.779	2.74148e-145
Pde7b	6.82386e-149	-0.556527	0.997	0.998	1.73538e-144
Scn4b	8.99413e-148	-0.720289	0.298	0.677	2.2873e-143
Itpr1	1.74361e-146	-0.579765	0.961	0.993	4.43417e-142
Gm19410	2.40464e-146	-0.826589	0.213	0.596	6.11525e-142
Hpca	1.48345e-144	-0.732769	0.674	0.887	3.77257e-140
Nrxn1	4.66596e-138	0.522312	0.997	0.988	1.1866e-133
Cdh18	3.08252e-135	0.940997	0.899	0.628	7.83917e-131
Sec14l1	9.23257e-135	-0.657337	0.344	0.707	2.34794e-130
Camkv	2.49806e-134	-0.629782	0.774	0.93	6.35282e-130
Adora2a	1.09539e-133	-0.65878	0.671	0.882	2.78568e-129
Neto2	2.53446e-132	-0.761825	0.562	0.829	6.44539e-128
Lsamp	2.1734e-130	0.491839	1	1	5.52716e-126
Agbl4	7.15192e-129	0.720152	0.911	0.69	1.8188e-124
Rbm39	1.37687e-125	0.458063	0.999	0.992	3.50153e-121
Gm10848	2.29465e-123	-0.727033	0.581	0.831	5.83551e-119
Snhg11	8.70841e-123	0.484893	0.999	0.998	2.21464e-118
Atp2b1	3.42647e-122	-0.448685	1	1	8.71385e-118
Lpp	4.3787e-120	0.611367	0.631	0.266	1.11355e-115
Kcnq1ot1	5.50412e-120	0.609658	0.957	0.856	1.39975e-115
Pde1b	2.10304e-118	-0.576976	0.734	0.913	5.34824e-114
Grm5	5.60583e-118	-0.341996	1	1	1.42562e-113
Spock3	1.40832e-116	-0.51391	0.996	0.994	3.58149e-112
Ptpn5	9.36143e-116	-0.567155	0.806	0.951	2.3807e-111
Ube3a	1.68464e-114	0.433076	0.999	0.996	4.2842e-110
Itga9	2.94921e-114	-0.627373	0.156	0.494	7.50013e-110
Luc7l2	4.59339e-113	0.445379	0.997	0.99	1.16815e-108
Ppp1r1b	6.86937e-113	-0.611266	0.612	0.85	1.74695e-108
Gm20754	7.8409e-113	0.760807	0.789	0.487	1.99402e-108
Cyld	1.10437e-111	-0.555187	0.814	0.942	2.80854e-107
Lrrk2	2.39191e-111	-0.639351	0.608	0.839	6.08286e-107
Gsg1l	2.27888e-109	-0.598139	0.435	0.74	5.79543e-105
Rsrp1	2.66319e-109	0.519386	0.977	0.893	6.77275e-105
Grip1	7.02471e-108	0.616381	0.974	0.832	1.78646e-103
Anks1b	1.46664e-107	-0.39941	1	1	3.72981e-103
Scaper	2.67246e-105	0.56095	0.9	0.701	6.79633e-101
Slc6a6	7.00039e-105	-0.563506	0.777	0.92	1.78027e-100
Atp6v0c	1.41756e-104	0.673765	0.953	0.882	3.60501e-100
Inf2	3.50205e-104	-0.591738	0.686	0.882	8.90607e-100
1700016P03Rik	7.23935e-104	-0.998045	0.061	0.34	1.84104e-99
Arhgap10	3.77785e-103	-0.572537	0.793	0.928	9.60745e-99
A230006K03Rik	2.27781e-102	0.641052	0.911	0.822	5.79271e-98
Galnt18	3.56762e-102	-0.625276	0.262	0.589	9.07283e-98
Lmo2	5.76476e-102	-0.474257	0.124	0.436	1.46604e-97
Dbp	8.62581e-102	-0.52446	0.248	0.577	2.19363e-97
AI480526	2.11268e-101	0.514961	0.572	0.249	5.37277e-97
Gria1	1.67139e-100	0.380818	0.999	0.997	4.25052e-96
Wipf3	4.52612e-100	-0.682401	0.576	0.797	1.15104e-95
Gm15810	2.45058e-99	-0.599469	0.736	0.887	6.23207e-95
Cacna1e	1.21663e-98	-0.449083	0.986	0.997	3.09401e-94
Pcdh9	4.78043e-98	0.591293	0.978	0.934	1.21571e-93
Gm47423	1.90453e-97	-0.81472	0.142	0.435	4.84342e-93
Scg5	1.00394e-96	0.540644	0.942	0.857	2.55313e-92
Ppfia2	3.70388e-96	0.481734	0.981	0.904	9.41934e-92
Srsf11	2.63427e-95	0.450029	0.977	0.924	6.69921e-91
Prkd1	4.09272e-95	-0.732021	0.719	0.868	1.04082e-90
Lhfpl3	2.39155e-94	0.578136	0.94	0.808	6.08196e-90
Baiap2	5.08022e-94	-0.468076	0.885	0.967	1.29195e-89
Trank1	7.55655e-94	-0.487754	0.88	0.967	1.92171e-89
Gm49906	1.1051e-92	-0.73305	0.358	0.659	2.81038e-88
Ppp4r4	2.3705e-92	-0.558301	0.528	0.774	6.02843e-88
Htr4	2.67514e-92	-0.794903	0.24	0.541	6.80314e-88
Kcnip3	4.50935e-91	-0.607297	0.47	0.722	1.14677e-86
Zranb2	1.51425e-90	0.428867	0.99	0.945	3.85088e-86
Apc	2.68784e-90	0.497178	0.945	0.826	6.83545e-86
Stmn2	4.2002e-90	0.477116	0.459	0.162	1.06815e-85
Strn	4.88596e-89	-0.575979	0.829	0.917	1.24255e-84
Cdr1os	8.88464e-89	0.400254	0.992	0.988	2.25945e-84
Dgkb	5.39605e-88	-0.343582	0.998	0.998	1.37227e-83
Gabrd	5.58614e-88	-0.50697	0.469	0.749	1.42061e-83
Snrnp70	9.21638e-88	0.391542	0.996	0.98	2.34382e-83
Fbxl16	1.15697e-87	-0.509599	0.518	0.765	2.94229e-83
Ccnl2	2.91296e-87	0.501846	0.838	0.64	7.40794e-83
Pnn	4.78154e-87	0.497709	0.888	0.72	1.21599e-82
Ralyl	9.35923e-87	0.447517	0.904	0.614	2.38015e-82
Tmem178b	1.33258e-85	0.450872	0.977	0.912	3.3889e-81
Cdh13	2.62607e-85	-0.714225	0.337	0.616	6.67837e-81
Ank2	3.63648e-85	0.399372	0.999	0.991	9.24794e-81
Ppp1r1a	2.76983e-84	-0.514202	0.486	0.744	7.04396e-80
Fgf12	1.55209e-83	0.392733	0.997	0.988	3.94713e-79
Prkcb	1.61094e-83	-0.44952	0.966	0.989	4.09678e-79
Chn1	2.3532e-83	-0.46066	0.903	0.962	5.98441e-79
Drd2	3.31043e-83	-0.504198	0.868	0.931	8.41876e-79
Lrfn5	7.52885e-83	0.440521	0.995	0.979	1.91466e-78
Ckb	1.90939e-82	-0.500574	0.952	0.988	4.85577e-78
5330417C22Rik	1.55123e-81	-0.564905	0.557	0.78	3.94494e-77
Tiparp	3.81924e-81	-0.649442	0.095	0.347	9.71271e-77
Enah	7.70938e-81	0.48709	0.784	0.513	1.96057e-76
Pcsk1n	1.29851e-80	0.617476	0.917	0.816	3.30225e-76
Guf1	3.41841e-80	0.477074	0.619	0.347	8.69336e-76
Sgcz	4.07422e-80	0.310254	1	0.997	1.03612e-75
Zswim6	1.49537e-79	-0.517964	0.936	0.956	3.80288e-75
Cttnbp2	2.77928e-79	-0.401218	0.985	0.992	7.06799e-75
Gm13269	3.96267e-79	-0.581721	0.679	0.847	1.00775e-74
Ppp2r2a	4.1513e-79	-0.506283	0.732	0.882	1.05572e-74
Egr1	1.24638e-78	-0.599568	0.207	0.481	3.16967e-74
Rgs11	1.3321e-78	-0.421113	0.175	0.454	3.38766e-74
Luc7l3	2.61679e-78	0.475523	0.916	0.795	6.65476e-74
Col11a1	1.07216e-77	0.411357	0.292	0.059	2.72661e-73
Epyc	1.15677e-77	-0.3574	0.052	0.281	2.94178e-73
Csmd2	7.60507e-77	0.494627	0.76	0.531	1.93405e-72
Gm28905	9.31324e-77	-0.666718	0.568	0.777	2.36845e-72
Scn9a	1.07937e-76	0.463165	0.512	0.226	2.74494e-72
Syp	1.15971e-76	0.467968	0.667	0.395	2.94926e-72
Npas3	1.55371e-76	0.444805	0.374	0.113	3.95125e-72
Kcnh4	1.8176e-76	-0.432137	0.207	0.488	4.62235e-72
Atad2b	2.24443e-76	0.473823	0.692	0.436	5.7078e-72
Tbc1d8	6.32818e-76	-0.502252	0.587	0.79	1.60932e-71
Per1	1.03587e-75	-0.468554	0.145	0.407	2.63431e-71
Ryr1	4.00541e-75	-0.422392	0.141	0.406	1.01862e-70
Gnas	8.61388e-75	0.467008	0.673	0.4	2.1906e-70
Rims2	2.14082e-74	0.31374	0.999	0.998	5.44433e-70
Dusp14	3.94923e-74	-0.531357	0.118	0.365	1.00433e-69
Cdh12	1.76788e-73	0.620918	0.701	0.444	4.49589e-69
Cep164	7.74744e-73	0.452238	0.638	0.382	1.97025e-68
Ccser1	1.95979e-72	0.372131	0.999	0.991	4.98395e-68
Hrh3	2.11916e-72	-0.341313	0.066	0.293	5.38924e-68
Runx2	2.77716e-72	0.491041	0.581	0.306	7.06261e-68
Slc25a25	4.33374e-72	-0.469808	0.216	0.484	1.10211e-67
Grik2	5.48892e-72	-0.37478	0.999	0.999	1.39589e-67
Npas2	6.19765e-72	-0.506368	0.722	0.888	1.57612e-67
4930402H24Rik	6.2434e-72	0.424136	0.928	0.812	1.58776e-67
2010300C02Rik	1.42232e-71	-0.420529	0.793	0.927	3.61711e-67
Junb	7.29338e-71	-0.977299	0.288	0.54	1.85478e-66
Cntn5	1.03524e-70	-0.702318	0.988	0.983	2.63273e-66
Actn2	2.47779e-70	-0.519792	0.679	0.846	6.30127e-66
Mapk4	2.71994e-70	-0.5249	0.68	0.85	6.91708e-66
Chd9	1.01815e-69	0.410871	0.93	0.829	2.58927e-65
Ctxn1	2.24795e-69	-0.431592	0.384	0.645	5.71676e-65
Fbxl17	3.52218e-69	0.40579	0.959	0.9	8.95726e-65
Lin28b	3.61301e-69	0.492001	0.744	0.512	9.18824e-65
Onecut2	4.04583e-69	0.436037	0.601	0.314	1.0289e-64
Baz2b	5.04369e-69	0.479486	0.85	0.679	1.28266e-64
Gpr83	1.08663e-68	-0.37425	0.107	0.346	2.76341e-64
Polr2a	1.5489e-68	0.430381	0.477	0.218	3.93901e-64
Kcnip2	2.98775e-68	-0.447331	0.552	0.769	7.59814e-64
Traip	9.08471e-68	-0.467477	0.347	0.602	2.31033e-63
Cacna2d1	1.0935e-67	0.391714	0.984	0.953	2.78087e-63
Tmem117	2.4172e-67	0.474809	0.694	0.46	6.14717e-63
Plcb1	2.48031e-67	-0.33902	0.999	1	6.30768e-63
Dok6	3.1649e-67	0.401522	0.966	0.908	8.04866e-63
Sox8	3.32382e-67	-0.415861	0.22	0.481	8.45282e-63
Dync1i1	4.22961e-67	0.462808	0.871	0.698	1.07563e-62
Mirg	4.64137e-67	0.46924	0.759	0.551	1.18035e-62
Camk2b	7.26759e-67	-0.427227	0.817	0.911	1.84822e-62
Fam155a	1.39615e-66	0.610176	0.944	0.863	3.55055e-62
Tcf4	1.86526e-66	0.485056	0.561	0.298	4.74354e-62
Cacna1a	3.10007e-66	0.35796	0.993	0.977	7.8838e-62
Prima1	5.80384e-66	-0.384689	0.108	0.339	1.47597e-61
Sh2d5	6.43729e-66	-0.424425	0.382	0.634	1.63707e-61
Ppp1r16b	9.60188e-66	-0.476496	0.471	0.696	2.44185e-61
Ldlrad4	2.73156e-65	-0.594204	0.806	0.89	6.94664e-61
Zfyve28	3.15661e-65	-0.436435	0.583	0.788	8.02757e-61
Gng7	4.29503e-65	-0.407248	0.883	0.949	1.09227e-60
Cdc42bpa	1.16833e-64	0.377502	0.951	0.882	2.97118e-60
Tfrc	3.48425e-64	0.415513	0.58	0.328	8.86079e-60
Bicd1	6.38696e-64	0.423985	0.873	0.732	1.62427e-59
Tnrc6b	1.16529e-63	0.407815	0.922	0.814	2.96344e-59
Gm28494	1.71986e-63	-0.516405	0.161	0.396	4.37377e-59
Pde2a	1.75829e-63	-0.42557	0.857	0.932	4.47151e-59
Bsg	2.78461e-63	0.468348	0.715	0.491	7.08153e-59
Gpr158	8.13139e-63	-0.376337	0.986	0.991	2.06789e-58
4933424G05Rik	9.92726e-63	-0.44598	0.441	0.672	2.5246e-58
Gas5	1.28668e-62	0.446428	0.787	0.588	3.27214e-58
A830036E02Rik	2.64225e-62	0.414892	0.658	0.378	6.71951e-58
Itpka	1.63531e-61	-0.423746	0.365	0.61	4.15876e-57
D7Ertd443e	3.51125e-61	-0.332716	0.059	0.256	8.92946e-57
Snhg14	3.5687e-61	0.305819	0.996	0.989	9.07556e-57
Ppp1r2	5.97575e-61	-0.491194	0.545	0.749	1.51969e-56
Dlc1	1.48837e-60	0.448192	0.508	0.26	3.78506e-56
Crocc	1.96214e-60	-0.398908	0.245	0.49	4.98992e-56
Etv5	2.77638e-60	-0.374171	0.134	0.361	7.0606e-56
Tsnax	2.91687e-60	0.420734	0.81	0.627	7.41789e-56
Adamts6	4.69443e-60	0.362615	0.345	0.12	1.19384e-55
Fnbp1l	5.63672e-60	-0.376474	0.871	0.943	1.43348e-55
Ctnna2	1.61805e-59	0.275576	1	1	4.11487e-55
Plk2	2.14759e-59	-0.515065	0.536	0.728	5.46153e-55
Kcnab1	2.74496e-59	-0.344726	0.987	0.992	6.98071e-55
Nrg3	4.41537e-59	0.557135	0.8	0.568	1.12287e-54
Cx3cl1	9.96442e-59	-0.420905	0.652	0.802	2.53405e-54
Pmepa1	1.08558e-58	-0.441074	0.454	0.675	2.76074e-54
Syt2	1.14491e-58	-0.300395	0.067	0.264	2.91162e-54
Spred2	1.3429e-58	-0.436258	0.443	0.671	3.41514e-54
Pcp4l1	3.85803e-58	-0.427542	0.416	0.646	9.81135e-54
Nrcam	3.87607e-58	0.396762	0.95	0.869	9.85723e-54
Gpm6b	6.68344e-58	-0.37964	0.94	0.973	1.69967e-53
Gmds	9.67696e-58	0.430662	0.784	0.587	2.46095e-53
Rtn3	1.40312e-57	0.35764	0.959	0.909	3.56827e-53
Dpy19l3	1.53503e-57	-0.415728	0.251	0.492	3.90372e-53
Exoc4	4.59998e-57	0.359038	0.961	0.914	1.16982e-52
Dmd	6.45118e-57	0.350482	0.992	0.967	1.6406e-52
Rasgrp2	7.03128e-57	-0.431627	0.491	0.688	1.78812e-52
D030068K23Rik	7.79371e-57	0.434816	0.631	0.392	1.98202e-52
Camk2n1	9.5998e-57	-0.439834	0.513	0.717	2.44133e-52
Npas4	1.06552e-56	-0.521035	0.08	0.275	2.70973e-52
Taf15	1.57506e-56	0.402648	0.765	0.578	4.00552e-52
Grm3	6.45912e-56	-0.562908	0.803	0.885	1.64262e-51
Nnat	1.52842e-55	-0.992969	0.372	0.583	3.88694e-51
Gm17231	1.72313e-55	-0.427574	0.342	0.575	4.38209e-51
Gpatch8	4.24027e-55	0.320261	0.992	0.967	1.07834e-50
Atf6	5.24594e-55	-0.432685	0.585	0.755	1.3341e-50
Synpo2	5.26181e-55	-0.427019	0.227	0.464	1.33813e-50
Fam184b	4.73714e-54	-0.386341	0.271	0.504	1.2047e-49
Srrt	8.1516e-54	-0.377835	0.411	0.632	2.07303e-49
Stk32a	8.42307e-54	-0.460253	0.548	0.735	2.14207e-49
Setbp1	1.31513e-53	0.385902	0.872	0.751	3.34451e-49
Gnb5	1.58094e-53	-0.385722	0.689	0.845	4.02048e-49
Pdzd2	2.06151e-53	-0.538415	0.676	0.816	5.24263e-49
Rgs2	2.50999e-53	-0.522502	0.251	0.467	6.38316e-49
Cdk17	3.81659e-53	-0.3572	0.867	0.949	9.70598e-49
Gm32647	5.02188e-53	0.650486	0.513	0.276	1.27711e-48
Kcnk2	5.05587e-53	-0.484409	0.881	0.924	1.28576e-48
Smpd3	6.01079e-53	-0.394285	0.826	0.914	1.5286e-48
Ptk2b	6.73195e-53	-0.383011	0.738	0.854	1.712e-48
Zmat4	1.40658e-52	-0.417068	0.227	0.454	3.57707e-48
Sntg1	1.79996e-52	0.287668	0.998	0.994	4.57749e-48
Sgk1	2.32481e-52	-0.509591	0.692	0.815	5.91222e-48
Gm1043	2.46287e-52	-0.385191	0.487	0.689	6.26332e-48
Rbm28	2.60374e-52	0.382183	0.812	0.65	6.62157e-48
Exoc6b	2.73671e-52	0.379933	0.854	0.721	6.95973e-48
Hlf	2.95749e-52	-0.383177	0.392	0.618	7.52119e-48
Nr4a1	3.02722e-52	-0.568826	0.128	0.324	7.69852e-48
Sgk3	3.02758e-52	-0.414813	0.634	0.798	7.69944e-48
Ppp2r3a	4.88108e-52	0.417995	0.628	0.405	1.24131e-47
Inka2	5.07116e-52	-0.329829	0.206	0.432	1.28965e-47
Elavl2	5.468e-52	0.305806	0.265	0.078	1.39057e-47
Erc2	8.18e-52	-0.276174	1	0.999	2.08025e-47
Rem2	8.99692e-52	-0.310474	0.14	0.352	2.28801e-47
A330015K06Rik	1.96765e-51	-0.417269	0.926	0.958	5.00393e-47
Rasd2	2.81777e-51	-0.402638	0.383	0.596	7.16586e-47
Slc24a2	2.85903e-51	-0.387111	0.953	0.974	7.27081e-47
Tesc	3.79435e-51	-0.388491	0.525	0.727	9.64941e-47
Rgs7bp	4.90265e-51	-0.388589	0.963	0.978	1.24679e-46
Mtcl1	5.71344e-51	-0.424549	0.713	0.84	1.45299e-46
Slc4a10	6.58828e-51	0.368765	0.893	0.788	1.67547e-46
Slc25a13	6.97007e-51	0.322463	0.373	0.16	1.77256e-46
Rasgef1a	1.08186e-50	-0.3605	0.706	0.853	2.75129e-46
Per2	1.47865e-50	-0.294832	0.102	0.297	3.76035e-46
Neto1	2.77679e-50	-0.419615	0.936	0.974	7.06165e-46
Tpm1	4.80385e-50	-0.480659	0.656	0.792	1.22167e-45
Cdk14	7.08659e-50	0.427308	0.556	0.337	1.80219e-45
Nsun7	7.62854e-50	0.345179	0.529	0.298	1.94001e-45
Stmn3	1.02249e-49	0.435376	0.839	0.717	2.60028e-45
Rbm26	1.07855e-49	0.334143	0.963	0.898	2.74287e-45
Ryr3	1.28522e-49	-0.287077	0.996	0.999	3.26844e-45
Cnr1	1.29072e-49	-0.807694	0.408	0.577	3.28244e-45
4930509J09Rik	1.52206e-49	0.397835	0.515	0.286	3.87076e-45
Robo2	1.64672e-49	0.294047	0.997	0.994	4.18777e-45
Sorcs2	2.03356e-49	-0.464904	0.602	0.758	5.17154e-45
Car12	3.02453e-49	-0.402782	0.228	0.445	7.69169e-45
Camkk1	1.86696e-48	-0.279389	0.116	0.312	4.74786e-44
Cacng4	2.49394e-48	-0.377065	0.429	0.639	6.34233e-44
Eef1a1	3.20895e-48	0.398396	0.837	0.682	8.16068e-44
Sema6d	3.97796e-48	0.39631	0.704	0.478	1.01163e-43
Trip12	4.31082e-48	0.363701	0.859	0.726	1.09628e-43
Fubp1	4.79253e-48	0.333354	0.927	0.85	1.21879e-43
Ier5l	1.33747e-47	-0.301911	0.173	0.386	3.40133e-43
Sobp	1.54075e-47	0.368787	0.402	0.191	3.91828e-43
Strbp	1.80734e-47	0.276098	0.994	0.987	4.59625e-43
Coq10b	2.10358e-47	-0.439658	0.277	0.483	5.34961e-43
Elk3	2.13493e-47	-0.293122	0.152	0.357	5.42934e-43
Wsb1	2.96827e-47	0.361065	0.548	0.337	7.5486e-43
Arel1	2.99352e-47	-0.347354	0.493	0.686	7.61281e-43
Pafah1b1	4.25197e-47	0.341064	0.917	0.845	1.08132e-42
Slc44a5	6.23124e-47	0.339252	0.395	0.184	1.58467e-42
Adgrl2	6.89706e-47	0.398788	0.85	0.705	1.75399e-42
Rtn1	7.88655e-47	0.330622	0.995	0.992	2.00563e-42
Rarb	1.58777e-46	-0.297676	0.992	0.999	4.03787e-42
Pdp1	3.50681e-46	-0.397309	0.32	0.527	8.91817e-42
Rerg	3.85886e-46	-0.407043	0.382	0.594	9.81346e-42
Kctd1	3.86853e-46	-0.373408	0.714	0.854	9.83806e-42
Camk1d	8.02495e-46	-0.323513	0.947	0.984	2.04082e-41
Ccdc88c	8.32732e-46	-0.39385	0.415	0.613	2.11772e-41
Atp1b1	1.27114e-45	0.327856	0.965	0.921	3.23263e-41
Gpm6a	1.69055e-45	0.320818	0.97	0.935	4.29925e-41
Gnal	2.38756e-45	-0.263415	0.995	0.998	6.0718e-41
Calm2	2.44718e-45	-0.314209	0.977	0.994	6.22342e-41
Cap1	3.77319e-45	-0.387259	0.485	0.665	9.59561e-41
Necab1	4.19126e-45	-0.493861	0.811	0.88	1.06588e-40
Sik3	5.71441e-45	-0.395382	0.851	0.922	1.45323e-40
Spred1	1.38692e-44	-0.361917	0.67	0.815	3.52708e-40
Gucy1a1	1.58521e-44	-0.387701	0.653	0.803	4.03135e-40
Parp8	1.60023e-44	0.335287	0.449	0.242	4.06954e-40
Egr4	2.08524e-44	-0.601952	0.134	0.316	5.30298e-40
Cnksr2	2.46797e-44	-0.300329	0.984	0.991	6.27629e-40
Egr3	2.54152e-44	-0.396117	0.119	0.298	6.46335e-40
Rims1	2.65257e-44	0.283897	0.988	0.974	6.74574e-40
Eml6	2.98577e-44	0.346783	0.919	0.823	7.59311e-40
Clasp2	4.58899e-44	0.36852	0.843	0.72	1.16703e-39
Stk3	4.72561e-44	0.296079	0.351	0.154	1.20177e-39
U2surp	5.11331e-44	0.331896	0.898	0.797	1.30036e-39
Zbtb20	6.09342e-44	0.367449	0.973	0.886	1.54962e-39
Arc	7.36596e-44	-0.468215	0.087	0.254	1.87324e-39
Ntrk3	8.3818e-44	-0.320679	0.963	0.979	2.13157e-39
D430041D05Rik	1.0047e-43	-0.360156	0.803	0.889	2.55506e-39
1700003D09Rik	1.0716e-43	-0.356844	0.375	0.58	2.72517e-39
Tra2a	1.1067e-43	0.32133	0.924	0.83	2.81444e-39
Efnb3	1.26718e-43	-0.289905	0.171	0.37	3.22256e-39
Rcan2	1.4863e-43	-0.370337	0.797	0.887	3.77981e-39
Lzts3	1.76632e-43	-0.340952	0.485	0.678	4.49194e-39
Ntrk2	1.90441e-43	-0.501888	0.823	0.889	4.84309e-39
Sntb2	1.95256e-43	-0.408677	0.488	0.656	4.96556e-39
Rit2	2.36445e-43	0.347874	0.92	0.832	6.01303e-39
Nrgn	3.26294e-43	-0.521701	0.933	0.956	8.29799e-39
Gm26871	3.49573e-43	0.31898	0.97	0.927	8.88999e-39
Gm15813	3.66186e-43	-0.330091	0.298	0.508	9.31246e-39
Ivns1abp	3.7541e-43	-0.427304	0.696	0.808	9.54705e-39
Cdh10	4.47197e-43	0.370397	0.755	0.547	1.13727e-38
Syndig1l	4.50261e-43	-0.340834	0.388	0.591	1.14506e-38
AY036118	4.65052e-43	-0.289778	0.989	0.996	1.18267e-38
Dennd1a	1.09357e-42	0.3098	0.955	0.91	2.78105e-38
Cd81	1.17268e-42	0.367063	0.517	0.316	2.98225e-38
Cadps	1.21983e-42	0.33751	0.956	0.891	3.10215e-38
BC005561	1.4354e-42	0.353279	0.71	0.535	3.65036e-38
Rgs20	1.46317e-42	-0.424021	0.713	0.84	3.721e-38
Arhgap42	1.56778e-42	0.255476	0.288	0.109	3.98702e-38
Pard3	1.96251e-42	-0.316247	0.949	0.974	4.99085e-38
Frmd6	4.80751e-42	-0.324526	0.164	0.353	1.2226e-37
Xkr4	5.44237e-42	0.30431	0.983	0.963	1.38405e-37
Camk2a	5.55153e-42	-0.295245	0.908	0.965	1.41181e-37
Rnf207	7.14699e-42	-0.322359	0.31	0.519	1.81755e-37
Ablim1	8.89731e-42	0.318801	0.504	0.29	2.26268e-37
Agk	9.48285e-42	0.335657	0.584	0.39	2.41158e-37
Ppp1r9a	1.02484e-41	-0.253239	0.992	0.998	2.60627e-37
Nav3	1.11273e-41	0.318245	0.958	0.895	2.82977e-37
Usp34	1.21376e-41	0.29801	0.939	0.882	3.08672e-37
Tmod1	1.90863e-41	-0.331862	0.305	0.506	4.85385e-37
Tcaf1	1.91469e-41	-0.403229	0.674	0.79	4.86925e-37
Smc2	2.3867e-41	0.285027	0.309	0.129	6.06961e-37
Rsrc1	2.50205e-41	0.33951	0.754	0.589	6.36296e-37
Cipc	2.56905e-41	-0.33707	0.438	0.629	6.53335e-37
Foxo1	2.73503e-41	-0.442123	0.502	0.66	6.95546e-37
Nr3c2	5.42983e-41	0.347704	0.899	0.815	1.38086e-36
Grm1	3.22251e-40	-0.414013	0.867	0.9	8.19517e-36
Gm42418	3.32679e-40	-0.256604	1	1	8.46035e-36
Thbs3	3.40437e-40	-0.257601	0.118	0.295	8.65767e-36
Id4	3.93711e-40	-0.35913	0.286	0.477	1.00125e-35
Jak2	4.23821e-40	-0.336564	0.417	0.609	1.07782e-35
Pcsk2	5.51672e-40	-0.292911	0.98	0.978	1.40296e-35
Zmym4	6.68232e-40	0.329455	0.841	0.713	1.69938e-35
Gli3	6.85356e-40	-0.433588	0.322	0.513	1.74293e-35
Tmem191c	6.9055e-40	-0.345492	0.716	0.843	1.75614e-35
Son	7.20988e-40	0.283584	0.999	0.995	1.83355e-35
Sorbs1	8.9627e-40	-0.313414	0.925	0.961	2.27931e-35
Cdc42ep3	1.14411e-39	-0.349614	0.382	0.573	2.90958e-35
Tubb2a	1.30912e-39	0.313756	0.428	0.234	3.32923e-35
Chuk	1.42783e-39	0.33566	0.702	0.543	3.63111e-35
Ano4	1.45658e-39	0.369739	0.438	0.235	3.70424e-35
Gpr88	1.80796e-39	-0.381294	0.77	0.859	4.59782e-35
Elmod1	2.16419e-39	-0.273911	0.981	0.992	5.50375e-35
Gm16105	2.32279e-39	-0.295512	0.331	0.534	5.9071e-35
Gm50024	2.33177e-39	-0.316066	0.281	0.483	5.92993e-35
Arhgap32	2.39697e-39	-0.347657	0.801	0.886	6.09572e-35
Arid3b	2.6049e-39	-0.29709	0.197	0.388	6.62451e-35
Coq3	3.78849e-39	0.304208	0.416	0.226	9.63452e-35
Ccdc58	3.84598e-39	0.327977	0.551	0.357	9.7807e-35
2610037D02Rik	4.63941e-39	0.335742	0.628	0.447	1.17985e-34
Camkk2	4.92821e-39	-0.342874	0.609	0.764	1.25329e-34
Per3	5.71192e-39	-0.303532	0.302	0.503	1.4526e-34
Zfp207	9.57089e-39	0.328346	0.786	0.65	2.43397e-34
A330102I10Rik	9.57615e-39	0.374182	0.588	0.404	2.43531e-34
Crip2	1.23505e-38	-0.276784	0.178	0.363	3.14084e-34
Gtdc1	1.30199e-38	0.354269	0.631	0.451	3.3111e-34
Uri1	1.30453e-38	0.329176	0.68	0.508	3.31755e-34
2210408I21Rik	1.30553e-38	0.361193	0.716	0.55	3.3201e-34
Jcad	1.39436e-38	-0.340223	0.442	0.624	3.54601e-34
Nell2	1.41409e-38	0.319674	0.903	0.832	3.59618e-34
Sik2	1.76997e-38	-0.435569	0.532	0.683	4.50121e-34
Iqgap2	2.35862e-38	-0.363541	0.397	0.586	5.9982e-34
Pde1c	3.19249e-38	-0.60726	0.546	0.685	8.11882e-34
Stxbp6	3.36819e-38	0.398203	0.391	0.205	8.56565e-34
Pitpnm2	3.6786e-38	-0.318745	0.403	0.591	9.35505e-34
Cog5	4.8411e-38	0.329528	0.751	0.594	1.23114e-33
Ube2e2	6.85617e-38	0.284737	0.958	0.932	1.74359e-33
Vav3	7.30073e-38	0.329532	0.646	0.451	1.85665e-33
Coch	8.39949e-38	-0.283515	0.148	0.324	2.13608e-33
B3gnt2	1.01064e-37	-0.349735	0.48	0.647	2.57016e-33
Ccnl1	1.05661e-37	0.323926	0.743	0.588	2.68705e-33
Ccdc88a	1.299e-37	0.340634	0.837	0.73	3.30349e-33
Car11	1.5681e-37	-0.316399	0.636	0.783	3.98784e-33
Svil	2.06915e-37	-0.303336	0.169	0.347	5.26205e-33
Pabpn1	2.33129e-37	0.323742	0.81	0.669	5.92871e-33
Gpc6	2.41241e-37	0.4214	0.741	0.52	6.13499e-33
AI593442	3.04184e-37	-0.313232	0.386	0.578	7.73571e-33
Nagk	4.1364e-37	0.301645	0.421	0.235	1.05193e-32
Dnajc6	4.84715e-37	0.321166	0.784	0.641	1.23268e-32
Ehbp1	6.0691e-37	0.332426	0.825	0.686	1.54343e-32
Trim9	9.5393e-37	-0.355176	0.769	0.854	2.42594e-32
Gm48677	1.39373e-36	-0.317742	0.383	0.569	3.54441e-32
Cplane1	1.44309e-36	0.29737	0.881	0.788	3.66992e-32
Gcnt2	1.50759e-36	-0.355489	0.495	0.663	3.83395e-32
Krt12	1.70625e-36	0.273203	0.488	0.281	4.33915e-32
Nedd4l	1.83878e-36	-0.288119	0.934	0.97	4.67619e-32
Rassf8	1.88758e-36	-0.348454	0.52	0.688	4.80031e-32
Rnf150	1.91523e-36	-0.343432	0.877	0.931	4.87061e-32
Kctd17	2.18715e-36	-0.407213	0.578	0.711	5.56215e-32
Tmem165	2.26004e-36	0.318811	0.564	0.382	5.7475e-32
Prickle2	2.83394e-36	0.332167	0.838	0.716	7.20698e-32
Cacna1d	3.02726e-36	0.284761	0.961	0.923	7.69862e-32
Sbf2	3.36653e-36	0.3063	0.904	0.823	8.56143e-32
Fam172a	4.21215e-36	0.32222	0.861	0.757	1.07119e-31
Slc22a17	4.39784e-36	0.35986	0.889	0.808	1.11841e-31
Gkap1	4.52216e-36	0.289992	0.358	0.178	1.15003e-31
Thsd4	6.01504e-36	-0.313966	0.147	0.316	1.52968e-31
Gnaq	7.34912e-36	0.318357	0.802	0.676	1.86896e-31
Zmynd8	7.94872e-36	-0.341546	0.507	0.667	2.02144e-31
Mbnl2	1.1942e-35	-0.318865	0.984	0.99	3.03698e-31
Lrrc1	1.20966e-35	-0.293538	0.339	0.532	3.07629e-31
Bcl11b	1.81266e-35	-0.32052	0.904	0.927	4.60978e-31
Ranbp17	1.85198e-35	0.330613	0.699	0.527	4.70977e-31
Scn1a	1.95995e-35	0.308745	0.931	0.874	4.98435e-31
Spry2	2.11152e-35	-0.307445	0.34	0.528	5.36979e-31
Mtf2	2.40109e-35	0.313279	0.803	0.674	6.1062e-31
Tef	2.94698e-35	-0.307397	0.545	0.702	7.49446e-31
Trerf1	3.01619e-35	-0.288133	0.905	0.957	7.67047e-31
Ccdc85b	3.99113e-35	-0.289728	0.251	0.435	1.01498e-30
Cpeb3	5.08587e-35	0.302844	0.892	0.785	1.29339e-30
Rnf144a	6.34015e-35	-0.266333	0.13	0.292	1.61236e-30
Pid1	6.69021e-35	0.316132	0.536	0.344	1.70139e-30
P4ha1	7.04355e-35	-0.393283	0.54	0.696	1.79124e-30
Ptchd4	9.78588e-35	0.325116	0.518	0.314	2.48865e-30
Bhlhe41	1.15085e-34	-0.269734	0.264	0.452	2.92674e-30
Gm2164	1.28003e-34	-0.390469	0.526	0.678	3.25524e-30
Olfm3	1.35678e-34	0.318373	0.624	0.418	3.45043e-30
Lrrc10b	1.40488e-34	-0.288376	0.251	0.433	3.57275e-30
Magi1	1.50512e-34	0.313198	0.756	0.604	3.82768e-30
Lin7b	1.93664e-34	-0.282167	0.361	0.553	4.92506e-30
Oprd1	2.10024e-34	-0.282227	0.285	0.474	5.34112e-30
Mlip	2.23881e-34	0.312486	0.432	0.248	5.69351e-30
Hcn1	2.311e-34	0.340127	0.625	0.429	5.8771e-30
Strn3	2.45618e-34	0.286874	0.936	0.877	6.24632e-30
St7	2.61203e-34	0.328316	0.679	0.526	6.64264e-30
Ei24	3.06268e-34	0.295516	0.512	0.334	7.7887e-30
Sec61a2	3.97121e-34	0.295352	0.655	0.476	1.00992e-29
Pde4a	4.32411e-34	-0.283835	0.432	0.616	1.09966e-29
Slc8a2	4.5164e-34	-0.277863	0.304	0.486	1.14857e-29
Klf12	4.98933e-34	0.325311	0.788	0.665	1.26884e-29
Ncor1	5.41202e-34	0.294423	0.899	0.833	1.37633e-29
Rtl8a	7.59176e-34	0.317025	0.587	0.424	1.93066e-29
Pak7	8.5994e-34	0.334369	0.68	0.518	2.18691e-29
Hap1	1.17799e-33	-0.301702	0.237	0.417	2.99574e-29
Atp1a1	1.1905e-33	-0.300103	0.443	0.615	3.02757e-29
Akt3	1.39188e-33	0.280974	0.938	0.878	3.53968e-29
Spata7	2.13464e-33	0.289192	0.645	0.473	5.42861e-29
Hras	2.58588e-33	-0.302967	0.437	0.615	6.57615e-29
Ngef	2.88865e-33	-0.303318	0.744	0.839	7.34613e-29
Ubr3	2.89608e-33	0.288136	0.859	0.775	7.36503e-29
Rpgr	3.1675e-33	0.308801	0.705	0.556	8.05528e-29
Tia1	3.43835e-33	0.282799	0.864	0.763	8.74406e-29
Sh3rf2	3.70831e-33	-0.400258	0.559	0.687	9.4306e-29
B830012L14Rik	4.24692e-33	0.330329	0.724	0.591	1.08003e-28
Gpr6	6.26402e-33	-0.309359	0.458	0.63	1.593e-28
Fat3	1.00509e-32	0.280352	0.985	0.968	2.55604e-28
Cacng3	1.02391e-32	-0.323032	0.644	0.767	2.60391e-28
Gm13974	1.47372e-32	-0.407107	0.276	0.446	3.74782e-28
5730522E02Rik	1.78038e-32	0.271412	0.974	0.961	4.52769e-28
Fmnl2	2.97574e-32	0.258762	0.287	0.129	7.5676e-28
Rnf112	3.29142e-32	-0.31726	0.518	0.665	8.3704e-28
Mink1	3.67486e-32	-0.284559	0.658	0.789	9.34554e-28
Ccdc85a	4.8545e-32	0.318461	0.497	0.318	1.23455e-27
Rimbp2	5.01968e-32	0.326704	0.785	0.664	1.27655e-27
Tmem181a	5.69438e-32	0.290544	0.699	0.544	1.44814e-27
9630028H03Rik	7.04745e-32	-0.386275	0.791	0.864	1.79224e-27
Acyp2	7.08589e-32	0.338588	0.691	0.542	1.80201e-27
Mast3	7.33262e-32	-0.291659	0.431	0.603	1.86476e-27
Hivep3	8.18187e-32	0.295512	0.728	0.585	2.08073e-27
Cst3	8.61883e-32	0.397155	0.724	0.593	2.19185e-27
Gm38413	8.78874e-32	-0.26718	0.369	0.55	2.23506e-27
Gipc2	9.31319e-32	-0.325747	0.292	0.462	2.36844e-27
Ccnd2	1.01081e-31	-0.430483	0.42	0.566	2.57059e-27
Ypel2	1.10096e-31	-0.312024	0.678	0.794	2.79986e-27
Mprip	1.19594e-31	-0.27863	0.82	0.887	3.04139e-27
Ambra1	1.28377e-31	0.283653	0.828	0.728	3.26477e-27
Hjurp	2.13765e-31	0.271811	0.501	0.329	5.43627e-27
Faf1	3.65804e-31	0.275632	0.877	0.802	9.30276e-27
Fam120c	4.3982e-31	0.305884	0.672	0.513	1.11851e-26
Nlk	4.44918e-31	0.298553	0.877	0.792	1.13147e-26
Tmem91	5.73888e-31	0.299846	0.743	0.594	1.45945e-26
Gprin3	6.67464e-31	-0.350969	0.881	0.889	1.69743e-26
Dhx36	6.71688e-31	0.277854	0.81	0.693	1.70817e-26
Chd3	9.75837e-31	0.289102	0.718	0.58	2.48165e-26
Shb	9.94292e-31	-0.260899	0.291	0.469	2.52858e-26
Brinp3	1.07975e-30	0.275814	0.803	0.618	2.74591e-26
Kcnq5	1.08814e-30	-0.27555	0.999	0.999	2.76724e-26
Gm1604a	1.33402e-30	-0.296944	0.545	0.692	3.39254e-26
2210408F21Rik	1.83906e-30	0.325607	0.528	0.363	4.67692e-26
Uty	1.85318e-30	0.319015	0.693	0.563	4.71283e-26
Ly6h	1.86899e-30	0.289595	0.87	0.738	4.75304e-26
Ptms	1.94613e-30	-0.293736	0.603	0.737	4.9492e-26
Garnl3	2.2674e-30	0.326846	0.576	0.412	5.76623e-26
Ccm2	2.44851e-30	-0.28705	0.363	0.536	6.22681e-26
Frmd4b	4.10426e-30	-0.383948	0.633	0.738	1.04375e-25
Foxn3	5.13716e-30	0.289926	0.407	0.24	1.30643e-25
Rabac1	7.55662e-30	0.328982	0.683	0.547	1.92172e-25
Letm2	8.35319e-30	0.281622	0.588	0.424	2.1243e-25
Ramp1	9.92866e-30	-0.291045	0.44	0.597	2.52496e-25
Htr2c	1.00573e-29	0.355376	0.919	0.872	2.55768e-25
Slc4a4	1.26552e-29	-0.282579	0.969	0.966	3.21834e-25
Stxbp5	1.42193e-29	0.295544	0.715	0.578	3.61611e-25
Paxbp1	1.45846e-29	0.268315	0.888	0.793	3.70901e-25
Slc2a13	1.80578e-29	-0.317045	0.948	0.969	4.59228e-25
Kifap3	2.09529e-29	0.278605	0.899	0.831	5.32854e-25
Zfhx4	2.16967e-29	0.284391	0.574	0.404	5.51769e-25
L3mbtl3	2.19666e-29	0.280553	0.395	0.228	5.58632e-25
Kif21a	2.24162e-29	0.267007	0.906	0.834	5.70066e-25
Fam135b	2.95185e-29	0.280877	0.871	0.796	7.50685e-25
Rgs4	3.11255e-29	-0.30136	0.331	0.496	7.91552e-25
Maml3	3.17055e-29	0.342809	0.663	0.512	8.06302e-25
Bcas3	3.72124e-29	0.288263	0.856	0.767	9.46349e-25
Kitl	3.74985e-29	-0.284462	0.169	0.324	9.53625e-25
Myo5a	5.58748e-29	-0.275656	0.803	0.878	1.42095e-24
A330008L17Rik	6.50367e-29	-0.42117	0.346	0.498	1.65395e-24
Gabrb2	7.17235e-29	0.272873	0.92	0.861	1.824e-24
Kdm3a	9.88384e-29	-0.287765	0.42	0.577	2.51356e-24
Itgav	1.06743e-28	0.297766	0.658	0.512	2.71457e-24
H3f3b	1.21135e-28	0.297119	0.73	0.59	3.08059e-24
Ap1s1	1.55909e-28	-0.264377	0.437	0.605	3.96493e-24
Srrm3	1.63951e-28	-0.279864	0.718	0.812	4.16945e-24
Kdm4c	1.80916e-28	0.264354	0.793	0.671	4.60087e-24
Lynx1	2.07374e-28	-0.26473	0.301	0.466	5.27373e-24
Clvs1	2.39338e-28	-0.290961	0.893	0.929	6.0866e-24
Hspa8	2.44316e-28	0.333906	0.838	0.764	6.21321e-24
Nr6a1	3.08469e-28	0.290839	0.722	0.585	7.84466e-24
Slc38a2	3.99893e-28	-0.276621	0.324	0.492	1.01697e-23
Cntn1	4.43965e-28	0.262957	0.966	0.931	1.12905e-23
Astn2	4.64033e-28	0.265698	0.56	0.383	1.18008e-23
Phf24	4.73361e-28	-0.262816	0.655	0.774	1.2038e-23
Mxi1	6.26272e-28	-0.255125	0.279	0.444	1.59267e-23
Cebpz	6.89707e-28	-0.259694	0.435	0.595	1.75399e-23
Epha5	6.92746e-28	0.33584	0.832	0.72	1.76172e-23
Slc1a1	7.0593e-28	-0.27575	0.53	0.67	1.79525e-23
Mpp6	7.1928e-28	-0.314571	0.621	0.739	1.8292e-23
Arhgef2	7.26605e-28	-0.260761	0.433	0.589	1.84783e-23
Astn1	8.86001e-28	0.261868	0.907	0.844	2.25319e-23
Chm	8.88252e-28	0.26974	0.659	0.51	2.25891e-23
Gm15680	9.00882e-28	-0.306923	0.243	0.399	2.29103e-23
Lgi1	9.29209e-28	0.280078	0.751	0.614	2.36307e-23
Gm10115	1.17213e-27	-0.27864	0.305	0.465	2.98085e-23
Gm48749	1.70552e-27	-0.29445	0.222	0.376	4.33732e-23
Gsk3b	1.75257e-27	-0.261654	0.844	0.906	4.45696e-23
Zdhhc20	1.89676e-27	0.261673	0.721	0.566	4.82365e-23
A730090N16Rik	2.02962e-27	-0.270148	0.254	0.408	5.16153e-23
Cwc27	2.3793e-27	0.267394	0.689	0.544	6.05079e-23
Fam49b	2.37998e-27	0.262366	0.871	0.796	6.05254e-23
Zfhx3	3.09101e-27	0.332662	0.858	0.736	7.86074e-23
Itm2b	3.79225e-27	0.337915	0.726	0.617	9.64407e-23
Frmd5	3.83558e-27	0.292009	0.866	0.786	9.75425e-23
Supt20	5.06695e-27	0.26624	0.695	0.544	1.28858e-22
Nrg3os	5.22144e-27	0.269357	0.421	0.248	1.32786e-22
Ddx17	5.77697e-27	0.258316	0.853	0.765	1.46914e-22
Wwc1	6.63596e-27	-0.266447	0.368	0.533	1.68759e-22
Peli1	7.21504e-27	-0.336068	0.449	0.591	1.83486e-22
Ripor2	7.58959e-27	-0.291056	0.731	0.823	1.93011e-22
Dynll1	7.92894e-27	-0.272174	0.558	0.706	2.01641e-22
Crebzf	9.09811e-27	0.253538	0.656	0.503	2.31374e-22
Fer	1.05135e-26	0.2674	0.666	0.523	2.67368e-22
Gm27032	1.23082e-26	0.290747	0.736	0.608	3.13011e-22
Wnk1	1.52137e-26	0.270845	0.774	0.675	3.86899e-22
Calm1	1.90687e-26	-0.25606	0.922	0.964	4.84935e-22
Gng3	1.94012e-26	0.279862	0.497	0.344	4.93392e-22
Arid5b	2.73e-26	0.303201	0.476	0.318	6.94268e-22
Hist3h2ba	2.82761e-26	0.261075	0.497	0.339	7.19089e-22
Cyfip2	2.86655e-26	-0.261219	0.673	0.801	7.28991e-22
Acer3	2.97271e-26	0.259153	0.417	0.26	7.5599e-22
Mast2	3.46048e-26	0.264974	0.516	0.357	8.80034e-22
Ssr4	4.07544e-26	0.272813	0.597	0.45	1.03643e-21
Bbx	4.41828e-26	0.2851	0.71	0.579	1.12361e-21
2510009E07Rik	4.76976e-26	-0.264618	0.341	0.496	1.213e-21
Bcr	5.85668e-26	-0.258674	0.694	0.806	1.48941e-21
Cyp7b1	6.71814e-26	0.294551	0.538	0.381	1.70849e-21
Abca8b	9.58076e-26	0.259989	0.427	0.273	2.43648e-21
Klhl7	1.0648e-25	0.266332	0.771	0.671	2.70789e-21
Nfat5	1.11795e-25	0.278027	0.803	0.707	2.84307e-21
Dennd1b	1.2022e-25	0.276712	0.726	0.606	3.05732e-21
Ddx39b	1.44349e-25	0.259077	0.652	0.506	3.67094e-21
Rock1	1.84806e-25	0.253753	0.84	0.743	4.6998e-21
Atl2	2.23717e-25	-0.261864	0.392	0.544	5.68934e-21
Mrpl41	2.41497e-25	-0.263601	0.482	0.622	6.14151e-21
Dlg4	2.53294e-25	-0.252251	0.515	0.658	6.44151e-21
Fmn2	2.56377e-25	0.269023	0.807	0.712	6.51993e-21
Srgap2	2.5992e-25	0.265584	0.791	0.678	6.61004e-21
Gm30382	3.74237e-25	0.342795	0.595	0.453	9.51723e-21
Mdm4	5.28093e-25	0.250242	0.769	0.641	1.34299e-20
Snhg20	5.52449e-25	0.281562	0.658	0.523	1.40493e-20
Prelid3a	6.04606e-25	-0.254522	0.692	0.796	1.53757e-20
A930015D03Rik	6.20244e-25	0.258487	0.679	0.544	1.57734e-20
Fam102b	7.90294e-25	-0.25959	0.361	0.51	2.0098e-20
Zdhhc14	8.4254e-25	-0.268341	0.85	0.911	2.14266e-20
Cdk12	1.13858e-24	0.261959	0.778	0.671	2.89553e-20
Nfyc	1.18112e-24	0.255963	0.628	0.484	3.00371e-20
Vezt	1.40465e-24	0.257184	0.666	0.527	3.57217e-20
Pcca	1.49221e-24	0.250728	0.742	0.618	3.79484e-20
Ppia	1.77864e-24	0.318591	0.903	0.86	4.52325e-20
Ano3	2.03082e-24	-0.267726	0.935	0.96	5.16457e-20
Adcy9	2.09048e-24	-0.260698	0.574	0.699	5.31631e-20
Cplx2	2.67333e-24	-0.251608	0.59	0.717	6.79854e-20
Gpr45	2.86604e-24	0.25938	0.49	0.338	7.28863e-20
Pdss2	4.95021e-24	0.27178	0.605	0.465	1.25889e-19
Pou6f2	7.77305e-24	0.275497	0.374	0.226	1.97676e-19
Pcdh10	8.61119e-24	0.264706	0.765	0.628	2.18991e-19
1110051M20Rik	1.08703e-23	0.257746	0.799	0.696	2.76442e-19
Eml1	1.09765e-23	-0.276585	0.477	0.607	2.79143e-19
St8sia3	1.68153e-23	-0.262366	0.639	0.752	4.27629e-19
Fstl5	1.80809e-23	0.289447	0.402	0.254	4.59815e-19
Osbp2	2.12698e-23	-0.276205	0.713	0.788	5.40913e-19
Klf9	2.5873e-23	-0.255006	0.465	0.601	6.57976e-19
Sez6	2.764e-23	-0.263921	0.757	0.831	7.02914e-19
Fndc9	3.20043e-23	-0.268313	0.535	0.661	8.13901e-19
Mcu	4.53837e-23	0.269428	0.716	0.596	1.15415e-18
Slc24a5	6.78127e-23	0.260991	0.661	0.543	1.72454e-18
Tcf25	7.1195e-23	0.254831	0.797	0.696	1.81056e-18
Ust	1.50724e-22	0.29674	0.487	0.342	3.83305e-18
Abhd2	4.41051e-22	-0.254686	0.497	0.63	1.12164e-17
Hdac8	5.95604e-22	0.256208	0.756	0.641	1.51468e-17
Sorbs2os	8.48025e-22	-0.25489	0.561	0.678	2.15661e-17
Edil3	9.28087e-22	0.261989	0.51	0.356	2.36022e-17
4930567K20Rik	1.02686e-21	-0.263789	0.221	0.356	2.6114e-17
Prickle1	1.1105e-21	-0.263686	0.729	0.823	2.8241e-17
Alcam	1.12682e-21	-0.25365	0.981	0.99	2.86562e-17
Sv2c	1.3447e-21	-0.266822	0.656	0.772	3.4197e-17
D5Ertd579e	2.57231e-21	-0.267827	0.591	0.705	6.54165e-17
C2cd2	2.22133e-20	-0.26964	0.392	0.529	5.64907e-16
Rnasek	2.72248e-20	0.269793	0.636	0.521	6.92355e-16
Grina	2.86217e-20	0.25024	0.798	0.714	7.27878e-16
Klhl2	3.81316e-20	-0.262083	0.76	0.825	9.69724e-16
Ndfip2	4.32499e-20	-0.283661	0.671	0.746	1.09989e-15
Samd5	5.30721e-20	-0.267075	0.423	0.551	1.34968e-15
Kcnh7	7.63006e-20	0.332761	0.8	0.726	1.9404e-15
4930415C11Rik	9.19817e-20	-0.353078	0.317	0.435	2.33919e-15
Nell1	1.03783e-19	-0.331019	0.635	0.733	2.6393e-15
Prkcg	1.2156e-19	-0.259443	0.239	0.362	3.09139e-15
Upp2	2.15481e-19	0.273091	0.783	0.683	5.47989e-15
Serinc1	4.91956e-19	0.256565	0.667	0.577	1.25109e-14
Akap9	6.43459e-19	-0.260216	0.869	0.895	1.63638e-14
4930428E07Rik	8.28426e-19	-0.276491	0.452	0.568	2.10677e-14
Synpr	1.11651e-18	-0.270817	0.469	0.59	2.83939e-14
Gm15261	7.90123e-18	-0.288	0.371	0.492	2.00936e-13
Zc3h12c	3.45292e-17	-0.260805	0.435	0.55	8.78111e-13
Etl4	3.84119e-17	-0.270889	0.761	0.83	9.76853e-13
Klhl1	8.23071e-17	0.271994	0.691	0.583	2.09315e-12
Unc13c	1.28748e-16	-0.3082	0.88	0.9	3.27419e-12
Tiam1	1.30921e-16	-0.259845	0.646	0.718	3.32944e-12
Hspa4	1.62186e-16	-0.257844	0.661	0.737	4.12454e-12
Garem1	6.51301e-16	-0.265005	0.645	0.732	1.65632e-11
Plcxd3	1.91221e-15	-0.312795	0.169	0.274	4.86293e-11
Mest	1.17307e-14	-0.289444	0.258	0.359	2.98323e-10
Thsd7a	9.56506e-14	-0.27397	0.872	0.861	2.43249e-09
Mme	2.60857e-12	-0.268771	0.372	0.457	6.63386e-08
Tafa2	5.42437e-12	0.296237	0.569	0.475	1.37947e-07
Ina	1.34638e-11	-0.297911	0.323	0.414	3.42399e-07
Tenm3	1.03704e-10	0.267635	0.876	0.84	2.6373e-06
Cntn3	8.02272e-10	-0.344306	0.723	0.727	2.04026e-05
Trpm3	1.00116e-09	-0.502781	0.442	0.513	2.54605e-05
Egfem1	1.07595e-05	-0.264292	0.5	0.548	0.273624
Htr1f	0.000131782	-0.427059	0.36	0.405	1
Unc5d	0.470763	-0.419783	0.66	0.625	1
Schip1	0.522878	-0.502845	0.556	0.533	1

## Sheet: thiamine_cluster3R61thiaminevsN
Column1	p_val	avg_log2FC	pct.1	pct.2	p_val_adj
Mhrt	9.82532e-145	-0.995063	0.024	0.571	2.49868e-140
Lrrk2	1.73462e-133	-1.17024	0.1	0.831	4.41131e-129
Gm15810	7.98982e-129	-1.2863	0.109	0.819	2.03189e-124
Gsg1l	1.53065e-124	-0.972613	0.045	0.61	3.89259e-120
Gm13269	3.27598e-122	-1.24715	0.073	0.701	8.33114e-118
5330417C22Rik	6.03115e-116	-1.1383	0.109	0.785	1.53378e-111
Kcnh4	1.16254e-111	-0.619479	0.016	0.435	2.95644e-107
Ror1	1.20346e-111	-0.806808	0.019	0.452	3.06051e-107
Actn2	1.62854e-111	-1.29218	0.128	0.814	4.14155e-107
Lrtm1	5.5544e-110	-1.13665	0.112	0.785	1.41254e-105
Scn4b	1.70799e-109	-0.934666	0.053	0.599	4.34359e-105
Zfyve28	2.17851e-108	-1.00083	0.1	0.746	5.54016e-104
Gm10848	2.46736e-108	-1.15112	0.061	0.616	6.27474e-104
Kcnip3	2.65138e-108	-1.00956	0.074	0.667	6.74273e-104
Npas2	8.724e-107	-1.26588	0.166	0.859	2.2186e-102
Tbc1d8	2.43453e-106	-0.956843	0.078	0.678	6.19125e-102
Neto2	2.26812e-104	-1.1453	0.123	0.774	5.76806e-100
Gabrd	1.93568e-102	-0.845965	0.062	0.61	4.92262e-98
Pde7b	2.06782e-101	-1.73344	0.87	0.994	5.25867e-97
Rap1gap	2.17372e-101	-1.21955	0.182	0.898	5.52799e-97
1700003D09Rik	1.98503e-100	-0.728571	0.042	0.525	5.04814e-96
Sorcs2	2.364e-98	-0.982341	0.064	0.599	6.01189e-94
4933424G05Rik	6.70935e-98	-0.942933	0.069	0.61	1.70625e-93
Ryr3	1.76421e-97	-1.78368	0.907	0.994	4.48655e-93
Mapk4	2.07901e-97	-1.17124	0.142	0.791	5.28712e-93
Ryr1	6.55697e-97	-0.55832	0.015	0.384	1.6675e-92
Phf24	9.59057e-97	-0.917704	0.116	0.751	2.43898e-92
Stk32a	5.46182e-96	-1.04598	0.079	0.633	1.389e-91
Rgs9	1.13243e-95	-1.8252	0.743	0.983	2.87987e-91
Pde1b	5.11149e-95	-1.17825	0.197	0.887	1.2999e-90
Ngef	3.04907e-94	-1.04153	0.146	0.797	7.75408e-90
Gm49906	6.23376e-94	-1.26996	0.046	0.514	1.58531e-89
Pde10a	1.2537e-93	-2.48539	0.95	0.994	3.18829e-89
Cacng3	2.42261e-93	-0.963229	0.125	0.763	6.16095e-89
Camkv	6.78565e-93	-1.26988	0.264	0.927	1.72566e-88
Rasgef1a	9.09327e-93	-0.987831	0.176	0.859	2.31251e-88
Rarb	9.09343e-93	-1.63506	0.88	0.989	2.31255e-88
Dlgap3	1.15984e-92	-0.937435	0.11	0.718	2.9496e-88
Srrm3	1.84624e-92	-1.02166	0.149	0.791	4.69518e-88
Cacnb2	3.55361e-92	-1.91929	0.927	0.994	9.03719e-88
Prkar2b	4.22014e-91	-0.898705	0.139	0.797	1.07322e-86
Arhgap10	4.08031e-90	-1.27938	0.243	0.887	1.03766e-85
2010300C02Rik	1.34992e-89	-1.21669	0.215	0.876	3.43297e-85
Slit3	1.55458e-89	-1.41388	0.83	0.983	3.95344e-85
Celf2	1.23223e-88	-2.16489	0.986	1	3.1337e-84
Galnt18	1.46623e-88	-0.949712	0.094	0.655	3.72877e-84
Gm28905	1.99529e-88	-1.44799	0.203	0.831	5.07421e-84
Sv2c	3.49237e-88	-0.970918	0.127	0.74	8.88145e-84
Bcr	5.33399e-88	-0.909651	0.148	0.791	1.35649e-83
Cacng4	7.23196e-88	-0.772647	0.05	0.514	1.83916e-83
Dlgap2	9.12189e-88	-1.36478	0.904	0.994	2.31979e-83
Kcnt1	2.70851e-87	-0.848618	0.126	0.74	6.88801e-83
Myt1l	5.54906e-87	-1.35156	0.918	0.989	1.41118e-82
Sntb2	7.18248e-87	-0.900579	0.07	0.576	1.82658e-82
Mpp6	8.84296e-87	-0.98957	0.133	0.751	2.24885e-82
Cx3cl1	3.28051e-86	-1.00264	0.139	0.751	8.34267e-82
Ppp1r1b	7.05822e-86	-1.11387	0.189	0.847	1.79498e-81
Camk4	1.1977e-85	-1.53275	0.781	0.972	3.04587e-81
Cacna1e	3.81571e-85	-1.28165	0.821	0.989	9.70373e-81
Dgkb	1.47591e-84	-1.8364	0.965	1	3.75338e-80
Gm19410	3.05456e-84	-0.739831	0.021	0.379	7.76806e-80
Plk2	5.06451e-84	-0.92676	0.092	0.633	1.28796e-79
Fam110b	5.12314e-84	-1.00775	0.163	0.797	1.30287e-79
Tspoap1	1.15637e-83	-0.828222	0.111	0.689	2.94076e-79
Pdzd2	1.21742e-83	-1.19577	0.182	0.814	3.09602e-79
Wipf3	2.97151e-83	-1.00128	0.099	0.644	7.55686e-79
Grm5	5.20202e-83	-1.81429	0.971	0.994	1.32292e-78
Samd5	1.14957e-82	-0.857435	0.075	0.588	2.92347e-78
Lzts1	1.65446e-82	-0.814004	0.072	0.571	4.20745e-78
Grin2b	1.70604e-82	-1.50006	0.95	0.994	4.33864e-78
Grin2a	1.94584e-82	-1.17793	0.829	0.989	4.94846e-78
Erc2	4.90278e-82	-1.4657	0.944	0.994	1.24683e-77
Rbfox1	1.12034e-81	-2.11729	0.983	0.994	2.84914e-77
Arhgap20	1.16149e-81	-0.891931	0.139	0.74	2.95378e-77
Kcnq5	1.21694e-81	-1.89158	0.963	0.994	3.09481e-77
Syndig1l	7.20741e-81	-0.704384	0.053	0.503	1.83292e-76
Plcb1	1.08242e-80	-1.65588	0.962	0.994	2.7527e-76
Lrrc7	1.18918e-80	-1.68492	0.963	0.994	3.02419e-76
Fstl4	1.35731e-80	-1.01689	0.158	0.763	3.45178e-76
Clip4	1.39944e-80	-0.783108	0.08	0.593	3.55891e-76
Lynx1	4.24991e-80	-0.650358	0.051	0.497	1.0808e-75
Arpp21	6.06792e-80	-1.39823	0.94	0.989	1.54313e-75
Gpr158	6.90044e-80	-1.31812	0.902	0.994	1.75485e-75
Gnal	1.17936e-79	-1.18772	0.846	0.989	2.99923e-75
Prelid3a	1.45643e-79	-0.839499	0.149	0.763	3.70386e-75
Rasgrp2	1.63516e-79	-0.805636	0.075	0.571	4.15837e-75
Cacna2d3	2.68278e-79	-1.78887	0.95	0.983	6.82258e-75
Nrg1	2.9088e-79	-1.9564	0.972	1	7.39737e-75
Sept11	4.09784e-79	-0.82214	0.147	0.768	1.04212e-74
Ptk2b	5.04312e-79	-0.902955	0.149	0.757	1.28252e-74
Fgf14	7.12733e-79	-1.84021	0.978	0.994	1.81255e-74
Ankrd33b	1.58706e-78	-0.760635	0.067	0.542	4.03604e-74
Zfp385b	2.13435e-78	-1.26685	0.847	0.972	5.42786e-74
Rgs7bp	2.13911e-78	-1.21542	0.803	0.977	5.43997e-74
Gria3	2.95041e-78	-1.07833	0.902	0.994	7.50318e-74
Gcnt2	4.43192e-78	-0.885022	0.06	0.508	1.12708e-73
Slc4a4	4.69552e-78	-1.22929	0.826	0.983	1.19412e-73
Hrh3	5.08978e-78	-0.3966	0.009	0.294	1.29438e-73
Mtus2	5.45836e-78	-0.802289	0.13	0.718	1.38812e-73
Ripor2	9.81045e-78	-1.00767	0.17	0.768	2.4949e-73
Celf5	1.48564e-77	-0.793536	0.123	0.701	3.77814e-73
Lzts3	2.18186e-77	-0.779515	0.082	0.582	5.54869e-73
Pcdh9	2.32285e-77	1.70233	1	1	5.90725e-73
Kcnd2	2.68618e-77	-1.84333	0.976	0.994	6.83123e-73
Ano6	2.69186e-77	-0.751694	0.098	0.627	6.84568e-73
Gabrg3	1.13562e-76	-1.4016	0.935	0.994	2.888e-72
Gli3	1.15176e-76	-0.762917	0.037	0.424	2.92904e-72
Ppp4r4	2.4097e-76	-0.905167	0.096	0.616	6.1281e-72
Kcnip2	3.07358e-76	-0.855102	0.092	0.599	7.81643e-72
Kalrn	3.61872e-76	-1.09248	0.882	0.977	9.20278e-72
Gabra4	2.52617e-75	-1.02576	0.232	0.847	6.42429e-71
Cnr1	2.69908e-75	-1.37368	0.074	0.531	6.86403e-71
Itpr1	2.77208e-75	-1.28152	0.768	0.972	7.04967e-71
Gm1043	3.83431e-75	-0.728068	0.059	0.497	9.75104e-71
Cacna1c	4.77579e-75	-1.10025	0.881	0.994	1.21453e-70
Phactr1	7.58746e-75	-1.68829	1	1	1.92957e-70
Nebl	9.20932e-75	-1.11709	0.833	0.983	2.34202e-70
Sh2d5	1.15144e-74	-0.671325	0.051	0.475	2.92823e-70
Sorbs2	1.3301e-74	-1.13346	0.841	0.972	3.38259e-70
Reln	1.56319e-74	-1.11792	0.154	0.74	3.97535e-70
Caln1	4.08026e-74	-1.24294	0.847	0.989	1.03765e-69
Sh3rf2	4.2784e-74	-0.860821	0.075	0.542	1.08804e-69
Gm1604a	6.01781e-74	-0.742134	0.062	0.503	1.53039e-69
Kctd16	2.77419e-73	-1.33653	0.924	0.994	7.05505e-69
Csmd1	3.62843e-73	-1.56419	0.981	1	9.22747e-69
Cntn4	5.62528e-73	-1.38833	0.907	0.989	1.43057e-68
Lmo2	6.4545e-73	-0.542917	0.024	0.362	1.64144e-68
Hpca	1.23637e-72	-1.05862	0.19	0.808	3.14422e-68
Frmpd4	1.36812e-72	-1.28525	0.903	0.983	3.47926e-68
Dpp6	1.56937e-72	-1.08432	0.916	0.994	3.99106e-68
Nkain2	2.0934e-72	1.23648	1	1	5.32372e-68
Pitpnc1	2.28071e-72	-0.853962	0.111	0.633	5.80007e-68
Pde2a	3.49938e-72	-1.22472	0.34	0.904	8.89928e-68
Gsdme	5.79022e-72	-0.928292	0.137	0.695	1.47251e-67
Syt1	6.04402e-72	-1.46093	0.974	1	1.53705e-67
Elmod1	6.11159e-72	-1.14492	0.798	0.972	1.55424e-67
Coch	9.05216e-72	-0.532164	0.03	0.384	2.30205e-67
Hs6st3	1.47815e-71	-1.84109	0.93	0.966	3.75908e-67
Pcsk2	2.25623e-71	-1.18923	0.871	0.983	5.73781e-67
Ano3	2.43788e-71	-1.14949	0.746	0.983	6.19978e-67
Gm16351	4.0697e-71	-0.740394	0.051	0.458	1.03496e-66
Ptprn2	5.52542e-71	-0.987976	0.876	0.972	1.40517e-66
C78859	1.05933e-70	-0.810178	0.154	0.74	2.69398e-66
Meis2	1.19181e-70	-1.24949	0.946	1	3.0309e-66
Mei4	1.77418e-70	-0.936523	0.107	0.621	4.51191e-66
Kcnq2	4.74036e-70	-0.72968	0.082	0.554	1.20552e-65
Ppargc1b	6.89267e-70	-0.667514	0.062	0.492	1.75287e-65
Nrxn3	7.84878e-70	-1.64416	0.986	0.994	1.99602e-65
Ntrk3	9.71832e-70	-1.1295	0.81	0.96	2.47147e-65
Sorbs2os	1.22262e-69	-0.691829	0.063	0.492	3.10925e-65
Dab1	5.19618e-69	-1.25372	0.915	0.966	1.32144e-64
Gm5441	7.84097e-69	-0.616532	0.053	0.458	1.99404e-64
Egr1	8.36892e-69	-0.634944	0.037	0.401	2.1283e-64
Bsn	9.16815e-69	-0.681484	0.078	0.542	2.33155e-64
4930567K20Rik	1.23801e-68	-0.560938	0.022	0.333	3.14839e-64
Cdh13	3.28705e-68	-1.18249	0.205	0.774	8.3593e-64
Cnksr2	4.07884e-68	-1.08276	0.845	0.983	1.03729e-63
Rhobtb2	5.57736e-68	-0.843355	0.1	0.588	1.41838e-63
Kcnab1	5.98564e-68	-1.27353	0.947	0.994	1.52221e-63
Smpd3	8.17839e-68	-1.10424	0.26	0.842	2.07985e-63
Ppp1r1a	1.10845e-67	-0.844656	0.073	0.508	2.8189e-63
Nexn	1.7398e-67	-0.880692	0.179	0.774	4.42448e-63
Gm45159	2.14237e-67	-0.698706	0.095	0.582	5.44826e-63
B230334C09Rik	2.52065e-67	-0.709699	0.129	0.672	6.41025e-63
Cntn5	4.09205e-67	-1.98201	0.939	0.96	1.04065e-62
Ldb2	4.1356e-67	-0.861813	0.123	0.644	1.05173e-62
Magi2	5.16961e-67	1.32739	1	1	1.31468e-62
Gnb5	7.48164e-67	-0.873526	0.165	0.729	1.90266e-62
Sgk1	7.95706e-67	-1.13376	0.246	0.819	2.02356e-62
Mctp1	9.02078e-67	-1.1285	0.869	0.96	2.29407e-62
Itpka	1.29953e-66	-0.687944	0.064	0.486	3.30485e-62
Gm10754	1.58732e-66	-1.67862	0.54	0.921	4.0367e-62
Syndig1	1.67697e-66	-0.786053	0.133	0.672	4.26469e-62
Dock7	1.73639e-66	-0.752569	0.135	0.672	4.41582e-62
Myh10	1.99952e-66	-0.818547	0.136	0.667	5.08497e-62
Ajap1	2.15087e-66	-0.634291	0.065	0.492	5.46987e-62
Scn3a	2.52234e-66	-0.878673	0.185	0.757	6.41457e-62
Kctd1	4.1564e-66	-0.9965	0.239	0.819	1.05702e-61
Reep1	6.19933e-66	-0.903164	0.165	0.723	1.57655e-61
Galnt13	7.5468e-66	-1.10273	0.931	0.989	1.91923e-61
Gm48677	8.25083e-66	-0.536834	0.041	0.407	2.09827e-61
Fam189a1	8.72141e-66	-0.854334	0.142	0.678	2.21794e-61
Itga9	8.80071e-66	-0.567151	0.025	0.339	2.23811e-61
St6galnac5	1.25039e-65	-0.93057	0.132	0.65	3.17988e-61
Gprin3	1.32054e-65	-1.18791	0.321	0.881	3.35827e-61
Rasgrp1	1.32681e-65	-0.819607	0.168	0.751	3.3742e-61
Robo2	1.66331e-65	-1.09499	0.918	1	4.22997e-61
Cdh9	2.4381e-65	-1.08097	0.194	0.763	6.20034e-61
Gm50024	2.65312e-65	-0.557299	0.03	0.356	6.74716e-61
Kcnh1	4.30501e-65	-0.792035	0.125	0.644	1.09481e-60
Mbp	4.43945e-65	1.28992	1	1	1.129e-60
Fam184b	4.94124e-65	-0.653314	0.051	0.435	1.25661e-60
Tbc1d30	5.18703e-65	-0.588605	0.057	0.458	1.31911e-60
Kif17	5.71966e-65	-0.530883	0.05	0.435	1.45457e-60
Chst11	8.53946e-65	-0.609428	0.068	0.497	2.17167e-60
Plekha6	8.61602e-65	-0.640711	0.072	0.503	2.19114e-60
Pitpnm2	9.19261e-65	-0.591501	0.049	0.429	2.33777e-60
Cplx2	1.80888e-64	-0.732669	0.134	0.672	4.60016e-60
Slc24a4	1.81039e-64	-0.697112	0.052	0.435	4.60399e-60
Edil3	2.1912e-64	1.40786	0.998	0.989	5.57245e-60
Atp2b1	2.3398e-64	-1.25447	0.976	0.994	5.95035e-60
Kcnh3	6.55666e-64	-0.500331	0.034	0.373	1.66742e-59
Sez6	6.59166e-64	-0.872059	0.183	0.763	1.67633e-59
Hs3st5	6.66503e-64	-1.0115	0.159	0.695	1.69498e-59
Ttyh1	7.53897e-64	-0.825091	0.196	0.785	1.91724e-59
Epha6	8.24527e-64	-1.04087	0.901	0.977	2.09686e-59
Cntnap2	9.57644e-64	-1.61932	0.979	0.994	2.43538e-59
Baiap2	1.18024e-63	-1.10736	0.475	0.96	3.00147e-59
Kcnk2	1.46508e-63	-1.29218	0.34	0.87	3.72584e-59
Iqgap2	1.54026e-63	-0.565898	0.037	0.384	3.91704e-59
Dclk1	1.58197e-63	-1.06193	0.911	0.994	4.02312e-59
Nin	1.72908e-63	-0.827344	0.19	0.763	4.39723e-59
Ttll11	1.91914e-63	-0.736056	0.137	0.667	4.88057e-59
Wwc1	1.92981e-63	-0.520823	0.039	0.39	4.90769e-59
Ptpn5	2.16252e-63	-1.01856	0.315	0.893	5.4995e-59
Camkk2	4.39484e-63	-0.778542	0.158	0.723	1.11765e-58
Gm26691	5.80312e-63	-0.981493	0.21	0.768	1.47579e-58
Pld5	7.14051e-63	-0.889337	0.086	0.531	1.8159e-58
Dnm3	1.05406e-62	1.2872	0.998	0.989	2.68058e-58
Ctxn1	1.53472e-62	-0.653899	0.091	0.554	3.90294e-58
Dcc	1.69956e-62	-1.32026	0.978	0.994	4.32216e-58
Gm47423	1.81309e-62	-0.698673	0.018	0.294	4.61088e-58
Adamts3	1.88719e-62	-0.969793	0.266	0.847	4.79931e-58
Fbxl16	3.68443e-62	-0.801388	0.116	0.605	9.36988e-58
Gria1	4.10846e-62	-0.978576	0.934	0.989	1.04482e-57
Ccdc88c	5.99516e-62	-0.871148	0.134	0.638	1.52463e-57
Gm13974	8.24819e-62	-0.661457	0.035	0.367	2.0976e-57
Pde4b	1.06349e-61	1.35149	1	1	2.70456e-57
Ank2	1.32026e-61	1.13883	1	1	3.35755e-57
Cpne5	1.63761e-61	-0.924126	0.298	0.876	4.1646e-57
Necab1	1.72221e-61	-1.15445	0.093	0.542	4.37976e-57
Gm13052	2.51138e-61	-0.632025	0.068	0.475	6.3867e-57
D430041D05Rik	2.8339e-61	-1.03688	0.31	0.842	7.20689e-57
Lrp1b	3.18002e-61	0.983713	1	1	8.0871e-57
4930525C09Rik	4.3503e-61	-0.406604	0.017	0.288	1.10632e-56
1700024B18Rik	7.03233e-61	-0.587873	0.055	0.435	1.78839e-56
Actn1	8.036e-61	-0.826246	0.196	0.774	2.04363e-56
Mog	1.04961e-60	1.33196	0.981	0.898	2.66926e-56
Camk2b	1.12738e-60	-1.06789	0.38	0.915	2.86703e-56
Grik5	1.16321e-60	-0.739542	0.179	0.751	2.95816e-56
Gm16105	1.33994e-60	-0.516943	0.039	0.379	3.40761e-56
Gabrb3	1.40343e-60	-0.886994	0.908	0.983	3.56907e-56
Galnt17	1.65442e-60	-0.985663	0.158	0.684	4.20734e-56
Ano2	1.86392e-60	-0.718323	0.051	0.418	4.74014e-56
Gm36756	2.82736e-60	-0.370647	0.02	0.299	7.19027e-56
Sipa1l1	2.91138e-60	-0.878178	0.784	0.977	7.40393e-56
AC149090.1	3.72213e-60	-1.22793	0.94	0.989	9.46575e-56
Rerg	3.73127e-60	-0.649141	0.045	0.395	9.489e-56
March1	4.06232e-60	1.78519	0.971	0.712	1.03309e-55
Myo1b	5.22941e-60	-0.698369	0.084	0.52	1.32989e-55
Lin7a	8.91678e-60	-0.661879	0.087	0.531	2.26763e-55
Hlf	9.09705e-60	-0.608548	0.065	0.463	2.31347e-55
9630028H03Rik	1.13057e-59	-1.05056	0.299	0.842	2.87515e-55
4930598N05Rik	1.56827e-59	-0.412627	0.016	0.277	3.98827e-55
Kcnma1	2.74541e-59	-0.902925	0.907	0.989	6.98184e-55
Sptbn2	2.75841e-59	-0.586699	0.07	0.48	7.01491e-55
Gm15680	3.59503e-59	-0.568746	0.033	0.35	9.14253e-55
Sh3rf3	3.68579e-59	-0.660905	0.131	0.638	9.37334e-55
1700016P03Rik	4.01049e-59	-0.760395	0.015	0.271	1.01991e-54
Unc79	4.89602e-59	-0.846291	0.754	0.972	1.24511e-54
A730090N16Rik	5.90797e-59	-0.454007	0.039	0.373	1.50246e-54
Kcnb1	6.37627e-59	-0.694859	0.106	0.576	1.62155e-54
Epyc	7.0822e-59	-0.340506	0.012	0.254	1.80107e-54
Kcna4	8.14909e-59	-0.693696	0.086	0.514	2.07239e-54
Celf3	8.54778e-59	-0.655057	0.093	0.537	2.17378e-54
4930415C11Rik	8.83475e-59	-0.616433	0.034	0.35	2.24676e-54
Clvs1	2.48687e-58	-1.01317	0.41	0.904	6.32435e-54
Mcf2l	2.58546e-58	-0.605043	0.076	0.492	6.57508e-54
Gm10419	2.66043e-58	-0.569196	0.075	0.492	6.76574e-54
Lrrtm4	2.91699e-58	-1.36133	0.972	0.989	7.41821e-54
Gm28494	3.41428e-58	-0.527454	0.024	0.311	8.68284e-54
Utrn	3.59172e-58	-0.850696	0.166	0.689	9.13411e-54
Gm47591	3.66497e-58	-0.61197	0.048	0.395	9.32039e-54
Ralgps2	4.31228e-58	-0.685849	0.092	0.531	1.09666e-53
A330008L17Rik	4.79565e-58	-0.725169	0.059	0.435	1.21958e-53
Atp2b2	5.32947e-58	-0.884744	0.818	0.983	1.35534e-53
Acvr1c	5.96484e-58	-0.690955	0.076	0.486	1.51692e-53
Dapk1	7.01354e-58	-0.819467	0.226	0.774	1.78361e-53
Ulk4	8.16881e-58	-0.591998	0.089	0.531	2.07741e-53
Meg3	8.23135e-58	-1.21126	0.995	1	2.09332e-53
Dpy19l3	8.26798e-58	-0.526458	0.048	0.401	2.10263e-53
Zmat4	8.67561e-58	-0.607742	0.032	0.339	2.20629e-53
Tcf4	8.96524e-58	1.4063	0.979	0.831	2.27995e-53
Apod	9.3174e-58	1.73216	0.992	0.904	2.36951e-53
Gpr83	1.46904e-57	-0.45252	0.022	0.299	3.73592e-53
Osbpl8	1.71067e-57	-1.05012	0.822	0.977	4.35041e-53
Crocc	2.42214e-57	-0.53337	0.044	0.384	6.15975e-53
Adcy5	2.44397e-57	-1.14077	0.678	0.949	6.21527e-53
Enpp2	3.2368e-57	1.28068	0.981	0.944	8.23149e-53
Gm42456	3.56433e-57	-0.514682	0.049	0.401	9.06445e-53
Trim46	4.44784e-57	-0.673265	0.1	0.554	1.13113e-52
Grid1	4.95469e-57	-0.837413	0.841	0.955	1.26003e-52
Kcnip4	5.02002e-57	-1.50558	0.981	0.977	1.27664e-52
Pdzd4	7.69866e-57	-0.666577	0.113	0.588	1.95785e-52
Svop	8.25518e-57	-0.623629	0.077	0.486	2.09937e-52
Mtcl1	1.70352e-56	-0.924674	0.243	0.808	4.33222e-52
Pcp4	1.81084e-56	-1.39142	0.831	0.983	4.60516e-52
Shank3	2.02698e-56	-0.593504	0.057	0.424	5.15482e-52
Tiam1	2.43152e-56	-0.763872	0.109	0.559	6.18359e-52
Sptbn4	2.52314e-56	-0.88618	0.317	0.853	6.41661e-52
Mark1	2.58604e-56	-0.693575	0.167	0.701	6.57656e-52
Dzip1l	2.74161e-56	-0.463552	0.045	0.384	6.97218e-52
Jakmip1	2.87198e-56	-0.639526	0.1	0.554	7.30373e-52
Atxn1	5.01163e-56	-0.978209	0.94	0.994	1.27451e-51
Gm13944	5.87776e-56	-0.688627	0.073	0.463	1.49477e-51
Camk2a	6.29089e-56	-1.03732	0.624	0.921	1.59984e-51
Trank1	6.52718e-56	-0.992496	0.577	0.921	1.65993e-51
Unc13a	8.57402e-56	-0.55607	0.071	0.463	2.18046e-51
4930428E07Rik	1.18653e-55	-0.599749	0.039	0.356	3.01747e-51
Fras1	1.26813e-55	-0.772914	0.208	0.757	3.22498e-51
Dbn1	1.29107e-55	-0.566948	0.098	0.548	3.28332e-51
Pmepa1	1.87299e-55	-0.765193	0.099	0.537	4.76321e-51
Syt7	2.44418e-55	-0.667782	0.116	0.582	6.21578e-51
Trim9	2.52739e-55	-0.867742	0.263	0.791	6.42741e-51
Samd12	4.20865e-55	-0.866295	0.856	0.972	1.0703e-50
Epb41	4.59854e-55	-0.899506	0.314	0.847	1.16945e-50
St18	5.00932e-55	1.43858	0.995	0.977	1.27392e-50
Penk	5.63459e-55	-2.02335	0.207	0.695	1.43293e-50
Pcp4l1	6.21422e-55	-0.696227	0.104	0.548	1.58034e-50
Neto1	6.21583e-55	-1.02668	0.711	0.944	1.58075e-50
Inpp4a	8.57336e-55	-0.662024	0.124	0.599	2.18029e-50
Prmt8	8.71558e-55	-0.534646	0.064	0.441	2.21646e-50
D430036J16Rik	8.83772e-55	-0.436884	0.031	0.328	2.24752e-50
Dach1	1.02481e-54	-1.15588	0.743	0.944	2.60619e-50
Rasd2	1.03328e-54	-0.614481	0.071	0.458	2.62772e-50
Gm38413	1.95882e-54	-0.48528	0.048	0.384	4.98146e-50
Slc25a25	2.49173e-54	-0.599898	0.062	0.429	6.33672e-50
Rap1gap2	2.83641e-54	-0.535235	0.049	0.39	7.21327e-50
Sntg1	3.57937e-54	-0.882906	0.91	0.966	9.10269e-50
Tesc	3.75318e-54	-0.754563	0.114	0.571	9.54472e-50
Spata16	5.93128e-54	-0.526284	0.015	0.254	1.50838e-49
Traip	7.19791e-54	-0.565672	0.054	0.401	1.8305e-49
Cxadr	7.8506e-54	-0.488387	0.048	0.384	1.99649e-49
Cabp1	1.05352e-53	-0.528118	0.052	0.395	2.67922e-49
Zbtb20	2.11592e-53	1.10539	1	0.977	5.38098e-49
Syt6	2.17628e-53	-0.602133	0.087	0.503	5.53451e-49
Psd	2.59674e-53	-0.471256	0.051	0.395	6.60378e-49
Dtnbos	3.15783e-53	-0.625093	0.098	0.531	8.03068e-49
Ppp3ca	4.7104e-53	-0.925226	0.998	1	1.1979e-48
Car12	5.97743e-53	-0.535126	0.037	0.345	1.52012e-48
Tenm2	7.16658e-53	-1.37319	0.967	0.977	1.82253e-48
Car11	1.2163e-52	-0.741416	0.207	0.763	3.09316e-48
Rgs20	1.26828e-52	-1.10751	0.317	0.808	3.22537e-48
Grin1	1.33803e-52	-0.880215	0.716	0.949	3.40276e-48
Lingo3	1.90835e-52	-0.424842	0.033	0.328	4.85311e-48
Fat3	2.40169e-52	-0.837476	0.857	0.96	6.10775e-48
Chrna7	2.40973e-52	-0.448316	0.038	0.345	6.12819e-48
Rgs17	2.89782e-52	-0.692006	0.134	0.605	7.36944e-48
Cntnap3	2.91647e-52	-0.533057	0.025	0.294	7.41689e-48
Fndc9	3.29191e-52	-0.667967	0.097	0.514	8.37165e-48
Mme	5.93576e-52	-0.622902	0.041	0.35	1.50952e-47
Lmo7	6.71344e-52	-0.885115	0.396	0.893	1.70729e-47
Rbfox3	9.15556e-52	-0.978278	0.644	0.938	2.32835e-47
Arl15	1.17714e-51	-0.837257	0.823	0.983	2.99357e-47
Pacs1	1.19228e-51	-0.652349	0.15	0.644	3.03209e-47
Syt16	1.33843e-51	-0.686819	0.161	0.655	3.40375e-47
Grm4	1.44959e-51	-0.424357	0.034	0.328	3.68645e-47
Gm26658	1.6383e-51	-0.396916	0.019	0.266	4.16635e-47
Rnf207	1.69688e-51	-0.487042	0.044	0.362	4.31533e-47
Speg	2.39152e-51	-0.509201	0.071	0.452	6.08187e-47
Plxna4	3.1443e-51	-0.617172	0.106	0.537	7.99626e-47
Gipc2	3.32726e-51	-0.527873	0.042	0.35	8.46157e-47
Prr5l	5.72202e-51	1.33558	0.971	0.904	1.45517e-46
Lrfn5	5.81105e-51	-0.84562	0.924	0.972	1.47781e-46
Wscd2	8.19337e-51	-0.69867	0.112	0.548	2.08366e-46
Dzank1	9.48492e-51	-0.650841	0.156	0.65	2.41211e-46
Drd2	1.12546e-50	-1.12277	0.068	0.418	2.86216e-46
Cdc42ep3	1.34523e-50	-0.622199	0.071	0.441	3.42104e-46
Snph	1.54214e-50	-0.548462	0.078	0.463	3.92183e-46
Gpr88	1.7289e-50	-0.865043	0.214	0.74	4.39677e-46
Slc2a3	1.8144e-50	-0.577277	0.092	0.508	4.61421e-46
A830092H15Rik	1.89521e-50	-0.365052	0.026	0.294	4.81972e-46
Shisa9	2.13708e-50	-1.01047	0.624	0.932	5.4348e-46
Rimbp2	2.74384e-50	-0.651183	0.139	0.61	6.97787e-46
Pak6	2.74399e-50	-0.444222	0.048	0.373	6.97824e-46
Adgrl1	3.27627e-50	-0.576921	0.103	0.531	8.33189e-46
Spred2	3.60224e-50	-0.69652	0.111	0.542	9.16086e-46
Slc24a2	4.31618e-50	1.04775	1	1	1.09765e-45
Tiam2	4.32996e-50	-0.636322	0.107	0.531	1.10115e-45
Rtn4rl1	4.74716e-50	-0.380655	0.024	0.282	1.20725e-45
Abat	6.31275e-50	-0.726495	0.215	0.763	1.60539e-45
Cfap74	7.88196e-50	-0.35608	0.031	0.311	2.00446e-45
Slc35f3	8.34743e-50	-0.981639	0.617	0.927	2.12283e-45
Gm10629	9.2434e-50	-0.366284	0.019	0.26	2.35069e-45
Add2	1.02816e-49	-0.877488	0.332	0.825	2.61472e-45
Hs6st2	1.17838e-49	-0.825034	0.197	0.695	2.99673e-45
Ncam1	1.26528e-49	1.0511	0.997	0.977	3.21774e-45
A430090L17Rik	1.41184e-49	-0.454893	0.036	0.328	3.59045e-45
Dlg4	1.86194e-49	-0.595269	0.089	0.486	4.7351e-45
Plxna2	2.05148e-49	-0.615565	0.14	0.605	5.21713e-45
Ksr2	2.73465e-49	-0.884206	0.38	0.847	6.95448e-45
Klhl1	2.84048e-49	-0.684695	0.088	0.48	7.22361e-45
Tcf12	3.46347e-49	1.1465	0.988	0.915	8.80795e-45
Slc12a5	3.66367e-49	-0.589798	0.168	0.678	9.31708e-45
Htr4	3.71116e-49	-0.681493	0.02	0.26	9.43785e-45
Tmeff2	3.77541e-49	1.14952	1	1	9.60125e-45
Otulinl	4.79729e-49	-0.545042	0.069	0.429	1.22e-44
Cap2	4.93696e-49	-0.840039	0.352	0.847	1.25552e-44
Slc2a13	5.40997e-49	-0.88284	0.72	0.96	1.37581e-44
Grb10	6.51533e-49	-0.516183	0.068	0.429	1.65691e-44
Shank2	6.53202e-49	-0.514632	0.073	0.446	1.66116e-44
Ppp1r2	8.84759e-49	-0.869108	0.245	0.791	2.25003e-44
Tmtc1	9.2392e-49	-0.886678	0.255	0.774	2.34962e-44
Shisa7	1.22632e-48	-0.463306	0.064	0.418	3.11865e-44
Gm15155	1.23244e-48	-0.991417	0.311	0.808	3.13421e-44
Ivns1abp	1.3893e-48	-0.85578	0.266	0.814	3.53313e-44
Rem2	1.41294e-48	-0.386453	0.031	0.305	3.59325e-44
Syt14	1.42307e-48	-0.655022	0.15	0.627	3.619e-44
Snap25	1.42648e-48	-0.816967	0.936	0.994	3.62769e-44
Arhgap6	1.7044e-48	-0.706314	0.067	0.418	4.33445e-44
Prkch	1.71786e-48	-0.669789	0.077	0.441	4.36868e-44
5730522E02Rik	1.7679e-48	-0.824184	0.807	0.949	4.49596e-44
Mmp17	1.93958e-48	-0.473875	0.047	0.362	4.93256e-44
Dgkh	3.25654e-48	-0.948178	0.429	0.87	8.28172e-44
Junb	4.62319e-48	-1.00133	0.05	0.362	1.17572e-43
Fam49a	5.81418e-48	-0.674572	0.161	0.638	1.4786e-43
Gm48003	6.196e-48	-0.595987	0.073	0.429	1.57571e-43
Dock10	6.22912e-48	1.16714	0.999	0.983	1.58413e-43
Hap1	8.14372e-48	-0.449087	0.044	0.35	2.07103e-43
Rora	8.71232e-48	-0.990298	0.987	1	2.21563e-43
Trf	1.0389e-47	1.24792	0.986	0.938	2.64203e-43
Tmem164	1.12152e-47	-0.515574	0.057	0.39	2.85213e-43
C2cd2l	1.25076e-47	-0.474091	0.073	0.441	3.18082e-43
Arg2	1.32259e-47	-0.322325	0.024	0.277	3.36348e-43
Tmem191c	1.85316e-47	-0.792173	0.239	0.751	4.71276e-43
Rxrg	1.86635e-47	-0.683297	0.066	0.407	4.74631e-43
Armc9	1.88142e-47	-0.6436	0.179	0.684	4.78465e-43
Nhsl2	1.90119e-47	-0.598015	0.064	0.401	4.83491e-43
Gm10115	2.56182e-47	-0.447037	0.037	0.322	6.51497e-43
Egr3	2.56252e-47	-0.414247	0.025	0.277	6.51674e-43
Grm1	3.12654e-47	-1.17523	0.611	0.904	7.95111e-43
Nr4a1	3.87649e-47	-0.482629	0.024	0.271	9.85831e-43
Fnbp1l	3.98666e-47	-0.921198	0.579	0.927	1.01385e-42
Tmem158	5.33541e-47	-0.851623	0.26	0.797	1.35685e-42
Sh3pxd2a	7.20487e-47	-0.517905	0.061	0.395	1.83227e-42
Erbb4	8.10775e-47	1.55505	0.97	0.836	2.06188e-42
Abr	9.02506e-47	-0.592086	0.116	0.537	2.29516e-42
Sgcz	9.1996e-47	-1.46742	0.977	0.966	2.33955e-42
Arhgap18	9.42072e-47	-0.598705	0.072	0.424	2.39578e-42
Matk	1.12132e-46	-0.676711	0.185	0.684	2.85163e-42
Cntn6	1.15476e-46	-0.650372	0.181	0.678	2.93667e-42
Icam5	1.33132e-46	-0.493314	0.072	0.435	3.38567e-42
Itga5	1.35863e-46	-0.355544	0.023	0.266	3.45513e-42
Prickle2	1.42668e-46	1.20438	0.994	0.927	3.62819e-42
Prkcb	1.46262e-46	-0.96048	0.917	0.983	3.71958e-42
Gm17231	1.59478e-46	-0.680619	0.08	0.446	4.05568e-42
Slc7a8	2.06004e-46	-0.477315	0.053	0.373	5.2389e-42
Ophn1	2.85156e-46	-0.534881	0.106	0.52	7.25181e-42
Bcl11b	2.879e-46	-0.964379	0.538	0.91	7.32159e-42
Spock2	3.0938e-46	-0.629171	0.118	0.537	7.86783e-42
Flrt2	3.48703e-46	-0.673205	0.079	0.446	8.86788e-42
Nmnat2	3.70307e-46	-0.582183	0.116	0.537	9.41727e-42
Adora2a	3.95943e-46	-0.807237	0.063	0.39	1.00692e-41
Alcam	4.24697e-46	-0.948558	0.94	0.994	1.08005e-41
Lgi1	4.95237e-46	-0.597216	0.134	0.582	1.25944e-41
Gm37679	4.97529e-46	-0.414694	0.055	0.379	1.26527e-41
Clasp2	7.79859e-46	1.05288	0.991	0.96	1.98326e-41
Lmo3	8.06698e-46	-0.671778	0.168	0.655	2.05151e-41
Shc3	1.21669e-45	-0.570451	0.064	0.395	3.09416e-41
Brinp1	1.24723e-45	-0.904469	0.787	0.938	3.17184e-41
Ncam2	1.26498e-45	1.15138	0.999	0.989	3.21697e-41
Drd1	1.31999e-45	-0.754613	0.08	0.435	3.35686e-41
Camk2n1	1.36106e-45	-0.759258	0.212	0.718	3.4613e-41
Ntm	1.42922e-45	-1.44783	0.941	0.898	3.63465e-41
Ptchd1	1.49519e-45	-0.446939	0.042	0.333	3.80241e-41
Dusp14	1.57261e-45	-0.433306	0.024	0.266	3.9993e-41
Rab40b	1.92653e-45	-0.610942	0.117	0.531	4.89935e-41
Ttyh3	2.00388e-45	-0.461485	0.059	0.384	5.09607e-41
Ier5l	2.32651e-45	-0.427512	0.033	0.299	5.91655e-41
Cdr1os	2.38981e-45	-0.704444	0.878	0.966	6.07753e-41
Plcl2	2.78854e-45	-0.870282	0.502	0.904	7.09153e-41
Foxg1	2.94442e-45	-0.471275	0.062	0.395	7.48796e-41
Myo3b	3.21169e-45	-0.626287	0.023	0.26	8.16766e-41
Rims2	3.72801e-45	-0.810018	0.95	0.989	9.48071e-41
Ccdc30	3.97249e-45	-0.468211	0.073	0.429	1.01025e-40
Ncan	4.04892e-45	-0.414215	0.041	0.328	1.02968e-40
Rnf150	4.46442e-45	-0.939654	0.465	0.853	1.13535e-40
Dbp	5.11157e-45	-0.564007	0.087	0.463	1.29992e-40
Ramp1	5.27447e-45	-0.593108	0.112	0.525	1.34135e-40
4930545L23Rik	5.4995e-45	-0.584158	0.057	0.373	1.39858e-40
Adgrl3	6.49327e-45	-0.866072	0.975	0.994	1.6513e-40
Per1	7.52761e-45	-0.448316	0.035	0.305	1.91435e-40
Hpgds	9.3579e-45	-0.392057	0.049	0.356	2.37981e-40
Gm44151	9.50811e-45	-0.464067	0.058	0.379	2.41801e-40
Crispld1	1.3472e-44	-0.371365	0.025	0.266	3.42607e-40
Rab3c	1.42298e-44	-0.819161	0.27	0.757	3.61879e-40
Doc2b	1.47091e-44	-0.451462	0.052	0.362	3.74066e-40
Gm42303	1.68348e-44	-0.395459	0.033	0.299	4.28127e-40
Sema3a	1.79533e-44	-0.671644	0.079	0.435	4.56572e-40
Gm48749	2.0541e-44	-0.479476	0.039	0.316	5.22378e-40
Klhl29	2.26929e-44	-0.834233	0.769	0.91	5.77103e-40
A330015K06Rik	2.3679e-44	-0.957984	0.855	0.977	6.0218e-40
Serpine2	2.59135e-44	-0.791739	0.176	0.638	6.59007e-40
B3gnt2	2.71468e-44	-0.63925	0.146	0.599	6.90371e-40
Plxdc2	2.78197e-44	1.20106	0.959	0.904	7.07482e-40
Epha7	3.15429e-44	-0.786795	0.214	0.684	8.02168e-40
Plcl1	3.82745e-44	1.16274	1	0.994	9.73358e-40
Ghr	3.997e-44	-0.572375	0.091	0.469	1.01648e-39
Gm48715	4.72883e-44	-0.327738	0.024	0.26	1.20259e-39
Pknox2	5.68579e-44	-0.574378	0.066	0.395	1.44595e-39
Gm43192	6.81523e-44	-0.456493	0.041	0.322	1.73318e-39
Rgs4	8.33958e-44	-0.595118	0.087	0.452	2.12084e-39
Lrrc6	8.55049e-44	-0.343888	0.027	0.271	2.17447e-39
Actl6b	9.42429e-44	-0.519325	0.069	0.407	2.39669e-39
Itgbl1	1.01594e-43	-0.502825	0.044	0.328	2.58365e-39
Synpo2	1.04065e-43	-0.431049	0.024	0.26	2.64649e-39
Rab34	1.06735e-43	-0.447616	0.054	0.362	2.71437e-39
Sorbs1	1.13568e-43	-0.790901	0.75	0.944	2.88815e-39
Ssbp4	1.27742e-43	-0.5628	0.1	0.492	3.2486e-39
Nphp4	1.28828e-43	-0.387348	0.033	0.294	3.27622e-39
Hivep2	1.43941e-43	-0.826582	0.879	0.966	3.66057e-39
Gm16226	1.47932e-43	-0.40196	0.038	0.311	3.76207e-39
Ccnd2	1.51363e-43	-0.68236	0.064	0.384	3.84932e-39
Nrg2	1.548e-43	-0.808364	0.39	0.847	3.93673e-39
Baz2b	1.93766e-43	1.07359	0.979	0.859	4.92767e-39
Arid3b	1.95094e-43	-0.449353	0.05	0.35	4.96145e-39
Kif1b	2.02339e-43	0.983911	0.998	0.955	5.14569e-39
Gm48747	2.18668e-43	-0.324111	0.023	0.254	5.56096e-39
Adgrb1	2.20121e-43	-0.6237	0.165	0.638	5.5979e-39
Galntl6	3.32398e-43	-1.26379	0.94	0.932	8.45321e-39
Pdp1	3.41217e-43	-0.530583	0.066	0.395	8.6775e-39
Dmtn	3.95245e-43	-0.577367	0.096	0.475	1.00515e-38
Ctnna2	4.37671e-43	1.14866	1	0.994	1.11304e-38
Chn1	4.83531e-43	-0.819257	0.76	0.96	1.22967e-38
Mgat5b	4.90397e-43	-0.442357	0.06	0.379	1.24713e-38
Rnf220	5.06888e-43	1.16414	0.979	0.927	1.28907e-38
Foxp1	5.37047e-43	-0.865341	0.996	1	1.36577e-38
Gad1	5.91653e-43	-0.61548	0.176	0.65	1.50463e-38
Mfap3l	5.93401e-43	-0.455479	0.06	0.379	1.50908e-38
Frmd5	6.19642e-43	1.11866	0.999	0.989	1.57581e-38
Homer1	7.00757e-43	-1.04397	0.487	0.893	1.78209e-38
Syngap1	9.32798e-43	-0.3833	0.042	0.322	2.3722e-38
Gm11817	1.23868e-42	-0.431993	0.036	0.299	3.15009e-38
Dhx32	1.789e-42	-0.509671	0.104	0.497	4.5496e-38
Ccsap	2.22132e-42	-0.429461	0.057	0.367	5.64904e-38
Sox2ot	2.31038e-42	1.04572	0.99	0.944	5.87553e-38
Prkcg	2.48409e-42	-0.48043	0.056	0.362	6.3173e-38
Dlgap4	2.48545e-42	-0.568971	0.167	0.633	6.32075e-38
Fam102b	2.77209e-42	-0.461157	0.058	0.367	7.0497e-38
Negr1	3.1554e-42	-0.878324	0.987	1	8.0245e-38
Zeb2	3.26961e-42	1.10386	0.985	0.91	8.31496e-38
Slc1a1	4.22043e-42	-0.511701	0.082	0.435	1.0733e-37
Slc8a2	4.30955e-42	-0.42814	0.054	0.356	1.09596e-37
Kif27	4.38336e-42	-0.330441	0.026	0.26	1.11473e-37
Hook1	5.61528e-42	-0.491635	0.105	0.497	1.42802e-37
Stk26	6.51254e-42	-0.440642	0.067	0.39	1.6562e-37
Kcnn2	8.2288e-42	-0.582345	0.118	0.52	2.09267e-37
Prkce	1.27807e-41	-0.688798	0.831	0.977	3.25027e-37
Gabra2	1.41028e-41	-0.730024	0.705	0.944	3.58647e-37
Sptb	1.7876e-41	-0.502174	0.098	0.469	4.54604e-37
Trerf1	2.02295e-41	-0.765685	0.613	0.921	5.14457e-37
St8sia3	2.20192e-41	-0.730584	0.21	0.689	5.59971e-37
Arpp19	2.41279e-41	-0.848145	0.321	0.836	6.13597e-37
Palm	2.89211e-41	-0.515124	0.087	0.441	7.35491e-37
Cdc37l1	3.24715e-41	1.0106	0.976	0.915	8.25784e-37
Rhbdl3	3.42904e-41	-0.497757	0.071	0.401	8.72038e-37
Klhl3	3.85814e-41	-0.448909	0.071	0.401	9.81165e-37
Necab2	4.08945e-41	-0.504488	0.08	0.424	1.03999e-36
Gabrg2	4.20005e-41	-0.567909	0.122	0.525	1.06811e-36
Nup93	4.69214e-41	-0.660595	0.251	0.774	1.19326e-36
Acaca	5.76734e-41	1.26189	0.856	0.633	1.46669e-36
Gm27032	6.31091e-41	-0.505221	0.14	0.576	1.60493e-36
D130043K22Rik	6.65608e-41	-0.441552	0.054	0.35	1.69271e-36
Tmem178b	7.50161e-41	0.969712	0.997	0.966	1.90773e-36
Ccdc107	9.30835e-41	-0.515365	0.09	0.446	2.36721e-36
Gucy1b1	1.24051e-40	-0.553112	0.142	0.576	3.15473e-36
Lrrc10b	1.48038e-40	-0.403352	0.049	0.333	3.76475e-36
Pkia	1.52482e-40	-0.588854	0.215	0.712	3.87777e-36
Rgs11	1.64152e-40	-0.479915	0.053	0.345	4.17455e-36
Bcas1	1.80219e-40	1.18079	0.857	0.644	4.58316e-36
Gpr6	2.26985e-40	-0.454893	0.033	0.282	5.77245e-36
Grm7	2.84257e-40	-0.970987	0.985	0.989	7.22894e-36
Aff3	2.93478e-40	-0.834139	0.739	0.966	7.46344e-36
Lrrfip1	4.59003e-40	-0.493201	0.118	0.514	1.16729e-35
Gda	4.91887e-40	-0.537278	0.096	0.463	1.25092e-35
Cit	5.51953e-40	-0.83192	0.471	0.859	1.40367e-35
Lmtk2	5.6087e-40	-0.573924	0.244	0.774	1.42635e-35
Cdh8	5.70384e-40	-0.976126	0.794	0.893	1.45054e-35
Mast4	6.11904e-40	1.09202	0.989	0.955	1.55613e-35
Smarca1	6.17367e-40	-0.518641	0.09	0.441	1.57003e-35
Rims1	7.66617e-40	-0.657455	0.901	0.938	1.94958e-35
Man1a	1.11569e-39	-0.794368	0.202	0.661	2.8373e-35
Slc8a1	1.15679e-39	1.33484	0.89	0.695	2.94182e-35
Camkk1	1.31625e-39	-0.307814	0.026	0.254	3.34736e-35
Unc5c	1.62255e-39	1.16639	0.986	0.887	4.12632e-35
Stk32c	2.06672e-39	-0.494683	0.094	0.452	5.25587e-35
Rnf180	2.69669e-39	-0.530855	0.073	0.395	6.85795e-35
Cers6	3.48849e-39	-0.540971	0.144	0.559	8.87157e-35
Tenm4	4.13515e-39	-0.653086	0.868	0.972	1.05161e-34
Ap1s1	4.15724e-39	-0.557548	0.147	0.576	1.05723e-34
Ppp2r2b	4.63098e-39	-0.672842	0.852	0.944	1.1777e-34
Gm2164	4.69852e-39	-0.753268	0.129	0.514	1.19488e-34
AI593442	4.95849e-39	-0.503802	0.091	0.441	1.26099e-34
Ddx5	5.14395e-39	0.821887	1	0.994	1.30816e-34
Strip2	5.18794e-39	-0.633936	0.091	0.435	1.31934e-34
Gm42722	5.45693e-39	-0.419639	0.048	0.322	1.38775e-34
Foxo1	5.51754e-39	-0.755337	0.181	0.616	1.40317e-34
Tro	7.05222e-39	-0.478101	0.113	0.503	1.79345e-34
Kctd17	8.30938e-39	-0.765255	0.154	0.565	2.11316e-34
Prr7	8.44124e-39	-0.465019	0.09	0.441	2.14669e-34
Rasl10b	8.78052e-39	-0.319731	0.035	0.282	2.23297e-34
Nol4	9.24923e-39	-0.611714	0.171	0.599	2.35217e-34
Mok	1.07379e-38	-0.414183	0.055	0.345	2.73077e-34
Phyhip	1.15117e-38	-0.37933	0.048	0.322	2.92754e-34
Nipal2	1.1853e-38	-0.467962	0.073	0.395	3.01433e-34
Fbxo41	1.21203e-38	-0.356239	0.045	0.316	3.08232e-34
Glce	1.2856e-38	-0.491237	0.084	0.424	3.26941e-34
Prkag2	1.33043e-38	-0.517932	0.087	0.429	3.38343e-34
Lrrc3b	1.49369e-38	-0.431107	0.04	0.294	3.79861e-34
9530059O14Rik	1.50089e-38	-0.815887	0.901	0.989	3.81693e-34
Gucy1a1	1.54371e-38	-0.620981	0.093	0.435	3.9258e-34
B830012L14Rik	1.832e-38	-0.51497	0.126	0.52	4.65895e-34
Gm20642	2.04509e-38	-0.60584	0.09	0.429	5.20088e-34
6530403H02Rik	2.04886e-38	-0.93134	0.39	0.808	5.21045e-34
Bmp6	2.09783e-38	-0.375073	0.031	0.266	5.33499e-34
Gm26760	2.36573e-38	-0.391288	0.028	0.254	6.01629e-34
Tmem63c	2.54146e-38	-0.351884	0.051	0.333	6.4632e-34
Bhlhb9	3.43714e-38	-0.448168	0.066	0.373	8.741e-34
Synpo	3.59221e-38	-0.516745	0.118	0.503	9.13535e-34
Dst	3.81909e-38	0.895049	0.999	0.989	9.71232e-34
Mir100hg	3.82085e-38	1.01207	0.991	0.927	9.7168e-34
Rgl1	3.87733e-38	-0.496493	0.093	0.441	9.86043e-34
Gm15261	3.93792e-38	-0.478593	0.037	0.282	1.00145e-33
Clstn3	3.94286e-38	-0.427943	0.078	0.407	1.00271e-33
Nfatc2	4.13201e-38	-0.341011	0.036	0.282	1.05081e-33
Ppp1r9a	4.64419e-38	-0.694015	0.957	1	1.18106e-33
Map2k6	4.74852e-38	-0.523564	0.066	0.367	1.2076e-33
Tubb4a	4.95955e-38	0.874231	0.99	0.977	1.26126e-33
Gm38251	6.76016e-38	-0.430742	0.053	0.333	1.71918e-33
Asic1	8.05942e-38	-0.370085	0.043	0.305	2.04959e-33
Madd	8.38271e-38	-0.470514	0.092	0.441	2.13181e-33
Ric8b	1.06437e-37	-0.791261	0.465	0.898	2.70679e-33
Man2a1	1.06517e-37	-0.618139	0.138	0.531	2.70882e-33
Naaladl2	1.08997e-37	1.29782	0.953	0.808	2.77191e-33
Tspear	1.20114e-37	-0.438209	0.032	0.266	3.05463e-33
Dlx6os1	1.27466e-37	-0.424206	0.053	0.333	3.24158e-33
Gad2	1.36839e-37	-0.597732	0.239	0.723	3.47996e-33
Adgrb3	1.41466e-37	-0.822507	0.996	1	3.59762e-33
Pced1b	1.51767e-37	-0.439906	0.044	0.305	3.8596e-33
Gm48006	1.58969e-37	-0.333078	0.035	0.277	4.04275e-33
Plppr4	2.01158e-37	-0.755321	0.397	0.853	5.11566e-33
Zfp536	2.23012e-37	1.07771	0.947	0.881	5.67143e-33
Vcl	2.38441e-37	-0.492707	0.072	0.384	6.06379e-33
Mag	2.47653e-37	0.975768	0.943	0.881	6.29807e-33
Bcl11a	2.50682e-37	-0.663969	0.257	0.718	6.3751e-33
Cacna1a	2.62877e-37	-0.631165	0.892	0.96	6.68524e-33
Ndrg4	2.7837e-37	-0.761935	0.756	0.949	7.07923e-33
Gm16152	3.11457e-37	-0.368133	0.034	0.271	7.92066e-33
Cntnap1	3.29632e-37	-0.38748	0.039	0.288	8.38288e-33
A830018L16Rik	3.30218e-37	-0.768205	0.241	0.678	8.39776e-33
Osbp2	3.38207e-37	-0.731924	0.314	0.819	8.60093e-33
Cacng2	3.77058e-37	-0.398412	0.059	0.35	9.58897e-33
Rundc3b	4.20185e-37	-0.519074	0.185	0.644	1.06857e-32
Rbm24	4.61172e-37	-0.479995	0.072	0.379	1.17281e-32
Ankrd28	5.63673e-37	0.994815	0.952	0.797	1.43348e-32
Runx1t1	5.72181e-37	-0.786607	0.605	0.898	1.45511e-32
Gabrb1	6.13155e-37	-0.676672	0.857	0.915	1.55931e-32
Usp29	6.54908e-37	-0.829178	0.326	0.751	1.6655e-32
Tnik	6.90465e-37	-0.678247	0.938	0.994	1.75592e-32
Pifo	6.9515e-37	-0.363841	0.035	0.271	1.76784e-32
Atrnl1	8.06173e-37	-0.749565	0.521	0.87	2.05018e-32
Gulp1	8.45996e-37	-0.617921	0.066	0.362	2.15145e-32
Sesn3	9.785e-37	-0.649302	0.277	0.774	2.48842e-32
Cacna1h	1.77282e-36	-0.387491	0.06	0.35	4.50846e-32
Cdh20	1.99479e-36	1.34446	0.845	0.667	5.07294e-32
A330049N07Rik	2.12188e-36	1.32891	0.786	0.441	5.39615e-32
Gm4258	2.17783e-36	1.05169	0.941	0.808	5.53844e-32
March4	2.34035e-36	-0.452193	0.06	0.345	5.95173e-32
Ebf1	2.64102e-36	-0.68669	0.082	0.412	6.71637e-32
Cacna2d2	2.72491e-36	-0.461322	0.076	0.39	6.92972e-32
Dlg2	2.80442e-36	-0.643921	1	1	7.13192e-32
Gm38575	2.92453e-36	-0.359867	0.042	0.294	7.43738e-32
Inhba	2.93147e-36	-0.366189	0.041	0.288	7.45503e-32
Rasgef1b	3.27158e-36	-0.828706	0.668	0.893	8.31995e-32
Hmgcll1	3.35222e-36	-0.562168	0.181	0.616	8.52502e-32
Jcad	3.564e-36	-0.527608	0.086	0.407	9.06362e-32
Neurl1a	4.19821e-36	-0.38761	0.05	0.316	1.06765e-31
Prkd1	4.93543e-36	-0.866497	0.266	0.729	1.25513e-31
Npas3	5.01037e-36	1.23741	0.865	0.661	1.27419e-31
Plekhg5	5.39812e-36	-0.360003	0.041	0.288	1.3728e-31
Rgs2	5.47308e-36	-0.423729	0.048	0.311	1.39186e-31
Bicdl1	5.87939e-36	-0.4153	0.078	0.395	1.49519e-31
Syt4	6.53315e-36	-0.561851	0.114	0.475	1.66145e-31
Snhg14	6.59762e-36	-0.628181	0.936	0.977	1.67784e-31
Lin7b	6.9595e-36	-0.488116	0.079	0.395	1.76987e-31
Fndc3b	7.5471e-36	-0.56792	0.177	0.61	1.9193e-31
Egfem1	8.74354e-36	-1.17492	0.301	0.695	2.22357e-31
Efna5	8.86893e-36	-0.640393	0.138	0.525	2.25546e-31
Nlgn1	8.9002e-36	-0.836645	0.997	1	2.26341e-31
Rapgef4	9.19697e-36	-0.7491	0.667	0.898	2.33888e-31
Ano4	9.98892e-36	1.04128	0.965	0.859	2.54028e-31
Fry	1.02421e-35	-0.64054	0.895	0.983	2.60467e-31
Itm2b	1.27202e-35	1.05703	0.986	0.893	3.23488e-31
Gria2	1.52154e-35	-0.68044	0.977	0.994	3.86942e-31
Sec14l1	1.97208e-35	-0.600027	0.176	0.605	5.0152e-31
Agap2	2.11738e-35	-0.437633	0.07	0.367	5.38471e-31
Cyfip2	2.1801e-35	-0.622387	0.28	0.78	5.54421e-31
March11	2.33344e-35	-0.427157	0.042	0.288	5.93417e-31
Galnt14	2.49157e-35	-0.415049	0.051	0.316	6.3363e-31
Cep19	2.55813e-35	-0.455536	0.086	0.407	6.50558e-31
Unc13c	2.79323e-35	-1.05204	0.595	0.853	7.10347e-31
Kcnn3	3.0411e-35	-0.426991	0.065	0.356	7.73382e-31
Vat1l	4.31482e-35	-0.519215	0.058	0.333	1.0973e-30
Kif21a	5.51982e-35	0.850901	0.992	0.96	1.40375e-30
Smad3	7.22219e-35	-0.395858	0.061	0.345	1.83668e-30
Pianp	7.95602e-35	-0.418274	0.062	0.345	2.02329e-30
Mir124a-1hg	9.95638e-35	-0.571737	0.252	0.718	2.53201e-30
Actr3b	1.23826e-34	-0.492987	0.12	0.486	3.14902e-30
Dbpht2	1.33469e-34	-0.287096	0.033	0.26	3.39425e-30
Plec	1.70479e-34	-0.372908	0.041	0.282	4.33544e-30
Id4	2.14127e-34	-0.495878	0.068	0.356	5.44546e-30
Jazf1	2.49157e-34	-0.48873	0.179	0.605	6.3363e-30
Ptprr	2.81516e-34	-0.443592	0.079	0.39	7.15924e-30
Gng7	2.83812e-34	-0.709599	0.603	0.966	7.21762e-30
Kcnh5	3.26102e-34	-0.398415	0.055	0.322	8.2931e-30
Sgpp2	3.3152e-34	-0.424039	0.042	0.282	8.43089e-30
Sec14l5	3.40798e-34	1.02334	0.859	0.633	8.66682e-30
Drp2	4.67144e-34	-0.318082	0.046	0.299	1.18799e-29
Cacna1b	4.74886e-34	-0.538554	0.188	0.605	1.20768e-29
Gm3764	4.88698e-34	-0.432075	0.058	0.328	1.24281e-29
Elk3	4.88772e-34	-0.36047	0.045	0.294	1.243e-29
Cnnm1	5.4946e-34	-0.441395	0.073	0.367	1.39733e-29
Stxbp5l	8.22905e-34	-0.585691	0.848	0.96	2.09273e-29
Nell1	9.62695e-34	-0.60308	0.053	0.311	2.44823e-29
Fam135b	9.76448e-34	-0.626591	0.248	0.689	2.4832e-29
C030017B01Rik	1.21911e-33	-0.34172	0.044	0.288	3.10033e-29
Mirg	1.21949e-33	-0.433533	0.147	0.542	3.10129e-29
Hectd2	1.23228e-33	-0.27978	0.033	0.254	3.13382e-29
Kcnj4	1.3099e-33	-0.378944	0.074	0.373	3.3312e-29
Slc7a14	1.35426e-33	-0.44713	0.076	0.373	3.44403e-29
Pde8b	1.71256e-33	-0.712458	0.573	0.87	4.35521e-29
Macrod2os1	1.86529e-33	-0.411303	0.079	0.384	4.74361e-29
A530046M15Rik	2.25089e-33	-0.375356	0.041	0.277	5.72424e-29
Pdzrn4	3.14465e-33	-0.565479	0.101	0.435	7.99715e-29
Cdh12	3.15684e-33	-0.550131	0.132	0.503	8.02815e-29
Rtl1	3.49774e-33	-0.31008	0.046	0.294	8.89511e-29
Rgs8	3.56638e-33	-0.410391	0.059	0.328	9.06965e-29
Rian	3.57441e-33	-0.564063	0.906	0.932	9.09008e-29
Ica1l	3.87359e-33	-0.374559	0.076	0.379	9.85093e-29
4430402I18Rik	4.80203e-33	-0.367736	0.08	0.39	1.2212e-28
Stx1b	6.0476e-33	-0.402574	0.078	0.379	1.53797e-28
Dnmbp	6.96776e-33	-0.378035	0.053	0.311	1.77197e-28
Stx3	7.09023e-33	-0.36819	0.062	0.339	1.80312e-28
Tmcc1	7.57896e-33	0.885367	0.995	0.96	1.92741e-28
Dock9	8.62539e-33	1.1214	0.828	0.695	2.19352e-28
Dscaml1	8.86684e-33	0.993188	0.912	0.768	2.25493e-28
Efnb2	9.23405e-33	-0.440902	0.075	0.367	2.34831e-28
Spry2	1.02484e-32	-0.513066	0.122	0.475	2.60627e-28
L1cam	1.12745e-32	-0.359732	0.052	0.305	2.86723e-28
Kirrel3	1.41587e-32	-1.05219	0.946	0.938	3.60069e-28
Syngr3	1.44794e-32	-0.45224	0.081	0.384	3.68226e-28
P2ry14	1.49831e-32	-0.499928	0.209	0.661	3.81035e-28
Lrp1	1.5182e-32	-0.374935	0.071	0.362	3.86092e-28
Carmil1	1.58674e-32	-0.411126	0.077	0.373	4.03523e-28
St6galnac3	1.80513e-32	0.920393	0.986	0.921	4.59062e-28
Dagla	2.11187e-32	-0.3329	0.057	0.322	5.37069e-28
Rgs7	2.17363e-32	-0.633356	0.763	0.898	5.52776e-28
Gmpr	2.33215e-32	-0.385972	0.083	0.39	5.9309e-28
Gm3294	2.59552e-32	-0.328619	0.044	0.282	6.60068e-28
Adarb1	2.70903e-32	-0.456202	0.087	0.395	6.88934e-28
Zfp831	2.98141e-32	-0.296577	0.042	0.277	7.58203e-28
Mpp7	3.15375e-32	-0.556625	0.156	0.542	8.02029e-28
Col25a1	4.45442e-32	-0.58678	0.076	0.362	1.1328e-27
Agfg2	5.17742e-32	-0.458983	0.093	0.407	1.31667e-27
Nfia	5.2426e-32	1.08782	0.828	0.605	1.33325e-27
Diras2	5.43701e-32	-0.372107	0.067	0.345	1.38269e-27
Coro2b	5.78857e-32	-0.448691	0.123	0.475	1.47209e-27
Smarcd3	6.53362e-32	-0.368403	0.084	0.39	1.66157e-27
Cntnap5b	6.84623e-32	-0.743661	0.353	0.763	1.74106e-27
Susd1	7.1209e-32	-0.40556	0.06	0.322	1.81092e-27
Adgrl2	7.212e-32	-0.609731	0.251	0.672	1.83408e-27
Myo16	7.65052e-32	-0.400384	0.065	0.339	1.9456e-27
Flrt3	8.32418e-32	-0.4774	0.13	0.497	2.11692e-27
Lrrn2	9.42387e-32	-0.420179	0.085	0.39	2.39658e-27
Fstl5	1.22384e-31	-0.481135	0.104	0.435	3.11235e-27
Pxdn	1.25354e-31	-0.416412	0.089	0.395	3.18789e-27
Cep126	1.3037e-31	-0.573954	0.165	0.559	3.31543e-27
Jph3	1.36998e-31	-0.293791	0.041	0.271	3.48399e-27
Ccdc88a	1.51003e-31	0.860193	0.964	0.819	3.84015e-27
Susd4	1.63458e-31	-0.42256	0.077	0.367	4.1569e-27
Dip2b	1.84505e-31	0.85236	0.968	0.915	4.69213e-27
Cebpz	1.89638e-31	-0.496023	0.145	0.52	4.82269e-27
Ppargc1a	1.9728e-31	-0.480497	0.071	0.35	5.01702e-27
Rab15	2.60161e-31	-0.384756	0.052	0.299	6.61616e-27
Chrm3	3.05916e-31	-0.794004	0.066	0.333	7.77976e-27
Clvs2	3.23505e-31	-0.408875	0.07	0.345	8.22705e-27
Aplp1	3.50171e-31	0.939826	0.991	0.972	8.9052e-27
Galc	3.72159e-31	-0.417404	0.102	0.429	9.46439e-27
Osbpl3	4.514e-31	-0.403598	0.055	0.305	1.14795e-26
Hs3st4	4.51614e-31	-0.913084	0.429	0.768	1.1485e-26
Lin28b	5.72839e-31	-0.445869	0.133	0.497	1.45679e-26
Dtnb	5.97397e-31	-0.616505	0.792	0.938	1.51924e-26
Slc6a17	6.56333e-31	-0.423131	0.068	0.339	1.66912e-26
Grasp	7.07308e-31	-0.389211	0.059	0.316	1.79876e-26
Uggt2	8.83975e-31	-0.492473	0.177	0.588	2.24804e-26
Zfp46	8.88362e-31	-0.442177	0.11	0.441	2.25919e-26
Asph	8.9924e-31	-0.437344	0.123	0.475	2.28686e-26
Scn2b	9.16761e-31	-0.39035	0.086	0.384	2.33142e-26
Fam131a	9.97295e-31	-0.42265	0.089	0.39	2.53622e-26
Akap5	1.02793e-30	-0.413111	0.092	0.401	2.61413e-26
Noct	1.21876e-30	-0.324205	0.041	0.266	3.09943e-26
Slc16a2	1.22777e-30	-0.408262	0.048	0.282	3.12233e-26
Nucb2	1.23089e-30	-0.38082	0.093	0.401	3.13027e-26
Plppr1	1.45465e-30	-0.745689	0.553	0.859	3.69931e-26
Tbc1d5	1.71498e-30	0.830169	0.979	0.91	4.36135e-26
Crmp1	1.89433e-30	-0.323397	0.053	0.299	4.81748e-26
Cacna1i	2.19696e-30	-0.391717	0.055	0.299	5.5871e-26
Tpm1	2.45274e-30	-0.660032	0.296	0.751	6.23757e-26
Tmtc2	2.64074e-30	1.20625	0.79	0.548	6.71566e-26
Cdh7	2.68097e-30	-0.496192	0.076	0.356	6.81799e-26
Eno2	3.0974e-30	-0.505284	0.164	0.548	7.87699e-26
Sntg2	3.10467e-30	-0.436814	0.046	0.277	7.89548e-26
Mn1	3.19881e-30	-0.313533	0.04	0.26	8.1349e-26
Dlgap1	3.89753e-30	-0.688374	0.907	0.921	9.91181e-26
Fcho1	4.43181e-30	-0.366909	0.087	0.384	1.12705e-25
Cdh10	5.01854e-30	1.02514	0.96	0.797	1.27626e-25
Cyp46a1	5.06273e-30	-0.454084	0.1	0.407	1.2875e-25
Slc16a11	5.35852e-30	-0.373027	0.05	0.288	1.36273e-25
Dact2	5.5235e-30	-0.366258	0.05	0.288	1.40468e-25
Tgfbr3	5.85026e-30	-0.46136	0.098	0.407	1.48778e-25
Etv5	6.14956e-30	-0.320709	0.042	0.266	1.56389e-25
Rnf112	6.96537e-30	-0.537871	0.17	0.554	1.77136e-25
Cnnm2	8.7258e-30	-0.517442	0.15	0.514	2.21906e-25
Rap1a	8.8268e-30	0.985157	0.774	0.565	2.24474e-25
Sv2b	9.93858e-30	-0.439452	0.098	0.407	2.52748e-25
Gm15738	1.0493e-29	-0.600737	0.356	0.814	2.66847e-25
Chst1	1.05573e-29	-0.437104	0.091	0.39	2.68482e-25
Snhg11	1.18799e-29	-0.762621	0.997	1	3.02118e-25
Asic2	1.43126e-29	-0.817415	0.855	0.842	3.63985e-25
Grik3	1.43348e-29	-0.50836	0.058	0.305	3.64549e-25
Phlpp1	1.43732e-29	0.807664	0.997	0.994	3.65525e-25
Adgrb2	1.43958e-29	-0.355093	0.078	0.362	3.66101e-25
Gm10649	1.47134e-29	-0.385624	0.056	0.299	3.74177e-25
Ctdspl	1.58397e-29	-0.531615	0.295	0.774	4.0282e-25
Myo6	1.64981e-29	0.92513	0.848	0.718	4.19564e-25
Znrf1	1.75018e-29	-0.65696	0.289	0.734	4.45087e-25
Tmem47	2.14445e-29	-0.35139	0.059	0.311	5.45354e-25
Sema6d	2.20121e-29	1.00441	0.947	0.751	5.59789e-25
Klhl13	2.21142e-29	-0.481089	0.133	0.48	5.62387e-25
Frmd6	2.23759e-29	-0.362069	0.049	0.282	5.69041e-25
Gm2415	2.32962e-29	-0.304726	0.047	0.277	5.92445e-25
Mir99ahg	2.64954e-29	0.924113	0.956	0.734	6.73805e-25
Dclk3	2.66642e-29	-0.400676	0.064	0.322	6.78097e-25
Ptprg	2.75071e-29	-0.560689	0.132	0.469	6.99533e-25
Nrgn	2.81108e-29	-1.0374	0.828	0.921	7.14885e-25
Sun2	4.12027e-29	-0.434241	0.088	0.379	1.04783e-24
Ntrk2	4.17262e-29	-0.842609	0.666	0.864	1.06114e-24
1700047M11Rik	4.24195e-29	0.931617	0.839	0.684	1.07877e-24
Grm8	4.32919e-29	-0.843435	0.218	0.593	1.10096e-24
Ptpro	5.48832e-29	-0.426836	0.08	0.362	1.39573e-24
Ptprn	6.2204e-29	-0.622771	0.417	0.842	1.58191e-24
Syne1	6.77572e-29	-0.599374	0.939	0.994	1.72313e-24
Kcnk1	7.06775e-29	-0.367126	0.052	0.288	1.7974e-24
Iqsec2	7.1154e-29	-0.467439	0.116	0.441	1.80952e-24
Slc4a3	7.72106e-29	-0.572673	0.307	0.729	1.96354e-24
Ralyl	8.40812e-29	1.10663	0.965	0.701	2.13827e-24
4930547E14Rik	8.69236e-29	-0.284989	0.044	0.266	2.21055e-24
Rbms1	1.07322e-28	-0.710453	0.451	0.814	2.72931e-24
Scn3b	1.1845e-28	-0.450014	0.095	0.39	3.01229e-24
Me3	1.20807e-28	-0.611021	0.588	0.881	3.07225e-24
Ptpn1	1.33768e-28	-0.463716	0.188	0.593	3.40186e-24
Pdlim7	1.47869e-28	-0.428742	0.116	0.441	3.76045e-24
Lpl	1.50363e-28	-0.327738	0.042	0.26	3.82387e-24
Radil	1.51993e-28	-0.354384	0.055	0.294	3.86534e-24
Lmo4	1.77498e-28	-0.483119	0.157	0.525	4.51394e-24
Frmd3	1.81419e-28	-0.346676	0.051	0.282	4.61368e-24
Spats2	1.99474e-28	-0.362928	0.066	0.322	5.07283e-24
Evl	2.1826e-28	-0.451771	0.146	0.503	5.55057e-24
Uxs1	2.33674e-28	-0.477923	0.141	0.492	5.94255e-24
Syt5	2.39301e-28	-0.407796	0.084	0.362	6.08566e-24
S100pbp	2.4164e-28	-0.513982	0.179	0.565	6.14515e-24
Plppr3	2.49177e-28	-0.296711	0.049	0.277	6.33683e-24
Gm8098	2.54559e-28	-0.387739	0.078	0.35	6.47368e-24
Dclk2	2.57379e-28	-0.479673	0.193	0.593	6.5454e-24
Arrb1	2.81459e-28	-0.328612	0.051	0.282	7.15778e-24
Shfl	2.89213e-28	-0.337216	0.057	0.299	7.35497e-24
Dnm1	3.2458e-28	-0.389583	0.179	0.582	8.25438e-24
Nrg3os	3.25058e-28	-0.619018	0.15	0.48	8.26655e-24
Brinp2	3.27733e-28	-0.437633	0.058	0.299	8.33458e-24
Nmt2	4.00617e-28	-0.418251	0.15	0.514	1.01881e-23
C1qtnf12	4.82016e-28	-0.353304	0.062	0.311	1.22582e-23
Nme7	4.95758e-28	-0.457573	0.194	0.599	1.26076e-23
Chgb	4.97723e-28	-0.473237	0.082	0.356	1.26576e-23
Htr2c	5.28822e-28	-0.732708	0.494	0.814	1.34485e-23
Bmerb1	5.35037e-28	-0.399965	0.108	0.424	1.36065e-23
Ccdc6	5.61718e-28	-0.348249	0.089	0.379	1.42851e-23
Ica1	5.62427e-28	-0.514663	0.347	0.751	1.43031e-23
Kif26b	6.30045e-28	-0.362504	0.061	0.305	1.60227e-23
Tmem131l	8.76843e-28	-0.310155	0.048	0.271	2.2299e-23
Rapgef4os1	9.18716e-28	-0.390932	0.06	0.299	2.33639e-23
4833422C13Rik	9.19983e-28	-0.326015	0.058	0.299	2.33961e-23
Mob3b	1.0023e-27	1.15465	0.63	0.249	2.54895e-23
Fgf12	1.26921e-27	-0.610284	0.952	0.977	3.22772e-23
Pcnx2	1.27822e-27	-0.432708	0.122	0.446	3.25065e-23
Khdrbs2	1.71359e-27	-0.640065	0.155	0.497	4.35784e-23
Lmtk3	1.72231e-27	-0.348659	0.096	0.395	4.38001e-23
Mapt	1.92577e-27	0.688638	0.997	0.994	4.89743e-23
Wdr78	2.02928e-27	-0.338037	0.057	0.294	5.16067e-23
Trrap	2.12551e-27	-0.467916	0.182	0.571	5.40537e-23
Syn3	2.13184e-27	-0.560184	0.308	0.751	5.42149e-23
Usp2	2.23135e-27	-0.460847	0.137	0.469	5.67455e-23
Catspere2	2.34395e-27	-0.449937	0.125	0.452	5.96091e-23
A230009B12Rik	2.49004e-27	-0.383772	0.068	0.322	6.33243e-23
Dchs2	2.81909e-27	-0.412286	0.063	0.305	7.16923e-23
Arel1	2.90918e-27	-0.519074	0.19	0.565	7.39835e-23
Pfkp	2.98599e-27	-0.43624	0.109	0.412	7.59367e-23
Pde4a	3.02934e-27	-0.437718	0.129	0.458	7.70392e-23
Cacna1d	3.05745e-27	-0.561997	0.738	0.881	7.77539e-23
Map4k4	3.05781e-27	0.929888	0.788	0.65	7.77632e-23
Wnk2	3.3113e-27	-0.38084	0.074	0.333	8.42096e-23
Coq10b	3.3961e-27	-0.373392	0.096	0.39	8.63662e-23
Atl2	3.64455e-27	-0.407556	0.133	0.469	9.26845e-23
Gucy1a2	3.65705e-27	-0.646329	0.552	0.831	9.30025e-23
Dennd1b	3.86627e-27	-0.405705	0.186	0.582	9.83232e-23
Nyap2	4.15118e-27	-0.587606	0.268	0.661	1.05569e-22
Gm44593	4.84558e-27	-0.460743	0.08	0.35	1.23228e-22
Mras	5.24334e-27	-0.354256	0.075	0.339	1.33343e-22
Shtn1	5.3508e-27	0.799572	0.928	0.791	1.36076e-22
Gm48321	5.48085e-27	-0.325143	0.049	0.271	1.39384e-22
Macrod2	6.56002e-27	-0.6499	0.992	1	1.66828e-22
Setd4	7.78691e-27	-0.474408	0.14	0.469	1.98029e-22
Usp3	8.04195e-27	-0.472128	0.228	0.655	2.04515e-22
Ago4	1.02159e-26	-0.409206	0.091	0.373	2.598e-22
Phc2	1.20026e-26	-0.544466	0.417	0.893	3.05238e-22
Cntnap5a	1.21852e-26	-0.892938	0.741	0.825	3.09882e-22
1700109K24Rik	1.27878e-26	-0.341317	0.068	0.316	3.25208e-22
Nptn	1.55006e-26	-0.568463	0.918	0.972	3.94195e-22
E430024I08Rik	1.55725e-26	-0.30114	0.064	0.311	3.96024e-22
Adcy9	1.61726e-26	-0.491851	0.264	0.706	4.11284e-22
Ptprd	1.87332e-26	0.559183	1	1	4.76404e-22
P4ha1	2.18145e-26	-0.569039	0.242	0.65	5.54765e-22
Ptprk	2.46716e-26	0.973944	0.772	0.588	6.27423e-22
Gm1976	2.6389e-26	-0.426142	0.177	0.548	6.711e-22
Pop5	2.64168e-26	-0.382216	0.099	0.39	6.71805e-22
Rprml	2.73367e-26	-0.367896	0.08	0.345	6.952e-22
Smurf1	2.98162e-26	-0.40312	0.113	0.418	7.58256e-22
Rragd	3.00102e-26	-0.319933	0.052	0.277	7.6319e-22
Stxbp1	3.07678e-26	-0.475871	0.19	0.565	7.82457e-22
Hipk2	3.92212e-26	0.921639	0.799	0.627	9.97434e-22
Filip1	4.2265e-26	-0.408323	0.128	0.452	1.07484e-21
Trnp1	4.44325e-26	-0.426456	0.092	0.367	1.12996e-21
Camk1d	5.23349e-26	-0.618142	0.941	0.989	1.33093e-21
Mir670hg	5.37978e-26	-0.438046	0.061	0.294	1.36813e-21
Dgkz	5.47661e-26	-0.427222	0.117	0.424	1.39276e-21
Sacs	5.96192e-26	-0.360051	0.092	0.373	1.51618e-21
Ahi1	6.2404e-26	-0.594358	0.969	0.983	1.587e-21
Srrt	8.06065e-26	-0.464775	0.156	0.503	2.0499e-21
Snx25	8.72714e-26	-0.380415	0.077	0.333	2.2194e-21
Six3	9.99858e-26	-0.34057	0.059	0.288	2.54274e-21
Rab26	1.06554e-25	-0.296107	0.049	0.266	2.70978e-21
Nap1l1	1.11808e-25	-0.498725	0.198	0.582	2.84339e-21
Osbpl6	1.13262e-25	-0.493184	0.286	0.678	2.88037e-21
Gm10125	1.25472e-25	-0.367113	0.087	0.362	3.19087e-21
Garem1	1.25856e-25	-0.574666	0.303	0.734	3.20063e-21
Dag1	1.35961e-25	-0.358539	0.088	0.362	3.45763e-21
Cep112	1.39255e-25	-0.376971	0.091	0.367	3.54139e-21
Ptms	1.42458e-25	-0.53415	0.292	0.734	3.62284e-21
Sncaip	1.46681e-25	-0.371257	0.066	0.305	3.73025e-21
Trak1	1.62784e-25	-0.354554	0.091	0.367	4.13975e-21
Rab6b	1.66111e-25	-0.489882	0.289	0.734	4.22436e-21
Erlin1	1.80033e-25	-0.398128	0.087	0.356	4.57841e-21
Tmem91	1.8458e-25	-0.366909	0.149	0.497	4.69405e-21
Htr1f	1.91504e-25	-0.646275	0.125	0.429	4.87014e-21
Sdc2	2.18196e-25	-0.401487	0.072	0.316	5.54893e-21
Qk	2.24548e-25	0.677262	0.995	0.994	5.71048e-21
Cntnap5c	2.40255e-25	-0.363579	0.071	0.322	6.10992e-21
Cdk5r1	2.43936e-25	-0.395439	0.097	0.379	6.20355e-21
Fgf13	2.50598e-25	-0.416972	0.062	0.294	6.37295e-21
Glp2r	2.81207e-25	-0.334456	0.075	0.328	7.15137e-21
Sirpa	3.29851e-25	-0.387743	0.091	0.362	8.38845e-21
Gatm	3.34164e-25	0.786763	0.904	0.881	8.49812e-21
Dipk1a	3.52752e-25	-0.399189	0.109	0.401	8.97084e-21
Arhgef17	3.53663e-25	-0.299083	0.061	0.294	8.99401e-21
Ssbp3	4.30099e-25	-0.338368	0.084	0.35	1.09378e-20
4930570B17Rik	4.54023e-25	-0.360739	0.089	0.362	1.15463e-20
App	5.07096e-25	0.606022	0.998	0.994	1.2896e-20
Ankrd6	5.23763e-25	-0.326869	0.049	0.26	1.33198e-20
Gm36198	5.91129e-25	-0.308441	0.079	0.339	1.5033e-20
Rit2	5.99657e-25	-0.631552	0.55	0.825	1.52499e-20
Arl3	6.04386e-25	-0.482288	0.246	0.655	1.53701e-20
Kifc2	6.5948e-25	-0.349301	0.099	0.384	1.67712e-20
Ptk2	7.72941e-25	0.74609	0.977	0.921	1.96567e-20
Pip5k1c	8.48642e-25	-0.314807	0.06	0.288	2.15818e-20
Calb1	8.99269e-25	-0.513307	0.12	0.418	2.28693e-20
Il34	9.70835e-25	-0.290585	0.05	0.26	2.46893e-20
E430024P14Rik	1.06951e-24	-0.318958	0.048	0.254	2.71986e-20
Fam171a2	1.1007e-24	-0.309438	0.053	0.271	2.7992e-20
Tmem179	1.14442e-24	-0.297492	0.064	0.299	2.91038e-20
Strn	1.15633e-24	-0.724242	0.761	0.944	2.94066e-20
Snca	1.25257e-24	-0.549565	0.324	0.746	3.18542e-20
Xpr1	1.25783e-24	-0.410235	0.257	0.695	3.19879e-20
Zdhhc18	1.41215e-24	-0.368877	0.067	0.299	3.59124e-20
Pip5k1a	1.59164e-24	-0.399872	0.231	0.65	4.04771e-20
Tafa2	1.62913e-24	-0.468831	0.056	0.277	4.14303e-20
Ttc8	1.75362e-24	-0.433134	0.26	0.684	4.45963e-20
Arhgap26	1.92448e-24	-0.629663	0.522	0.797	4.89414e-20
Zeb1	2.08943e-24	-0.570917	0.662	0.87	5.31363e-20
Rai1	2.18003e-24	-0.41684	0.145	0.469	5.54405e-20
Cacng8	2.2441e-24	-0.304448	0.063	0.294	5.70698e-20
Lrrc40	2.38829e-24	-0.333234	0.113	0.412	6.07366e-20
Esrrg	3.10061e-24	-0.711784	0.511	0.78	7.88517e-20
Thbs3	3.12612e-24	-0.296439	0.069	0.311	7.95003e-20
Snx10	3.1412e-24	-0.358062	0.095	0.367	7.98838e-20
Sgsm2	3.19197e-24	-0.426325	0.11	0.395	8.1175e-20
Ppp3r1	3.22406e-24	-0.484801	0.192	0.554	8.1991e-20
Arhgef3	3.31804e-24	-0.409685	0.116	0.412	8.43811e-20
Nfib	3.35824e-24	1.07498	0.617	0.294	8.54035e-20
Gm49961	3.44556e-24	-0.347191	0.09	0.356	8.76241e-20
Slc9a7	3.4906e-24	-0.323486	0.071	0.311	8.87695e-20
Sfxn3	3.68103e-24	-0.299943	0.057	0.277	9.36123e-20
Mir9-3hg	3.82521e-24	-0.374192	0.101	0.379	9.7279e-20
Atp6ap1l	4.28039e-24	-0.319966	0.053	0.266	1.08855e-19
Scamp1	4.77757e-24	-0.469467	0.227	0.616	1.21498e-19
Clmp	4.85628e-24	-0.311581	0.064	0.294	1.235e-19
Tmem38a	4.94595e-24	-0.419906	0.114	0.401	1.2578e-19
Elmo1	4.99819e-24	0.737347	0.996	0.966	1.27109e-19
Selenoi	5.53074e-24	-0.453208	0.154	0.48	1.40652e-19
Cdh2	6.87885e-24	0.736799	0.938	0.864	1.74936e-19
Hs2st1	7.86046e-24	-0.413877	0.243	0.661	1.99899e-19
Bex1	8.13538e-24	-0.352052	0.105	0.39	2.06891e-19
Ppp2r3a	8.9625e-24	0.822968	0.89	0.78	2.27925e-19
Dgkg	9.51866e-24	-0.390259	0.068	0.299	2.42069e-19
Ccdc57	9.71474e-24	-0.309046	0.069	0.305	2.47056e-19
B230209E15Rik	1.09317e-23	-0.441279	0.183	0.531	2.78004e-19
Btg3	1.12779e-23	-0.2557	0.051	0.26	2.86809e-19
Tspan13	1.15755e-23	-0.397859	0.102	0.373	2.94375e-19
Arhgap44	1.25771e-23	-0.375394	0.075	0.316	3.19848e-19
Pkig	1.36545e-23	-0.470623	0.239	0.638	3.47247e-19
Chl1	1.38083e-23	-0.323606	0.076	0.322	3.51159e-19
Tef	1.70164e-23	-0.434063	0.297	0.751	4.32744e-19
Arf3	1.71511e-23	-0.443602	0.167	0.503	4.3617e-19
Atf6	1.74057e-23	-0.537085	0.318	0.746	4.42645e-19
Plppr5	1.95625e-23	-0.367463	0.095	0.362	4.97494e-19
Ap1s2	1.97288e-23	-0.379409	0.108	0.39	5.01722e-19
Otud7b	1.97715e-23	0.867852	0.778	0.616	5.02808e-19
Gabrb2	2.10771e-23	-0.513041	0.538	0.842	5.36013e-19
Csmd3	2.14721e-23	0.563657	1	1	5.46056e-19
Myo1d	2.23829e-23	0.908923	0.753	0.542	5.69218e-19
Mgat4b	2.31237e-23	-0.343116	0.095	0.362	5.88058e-19
Arfgef3	2.42024e-23	-0.386687	0.206	0.588	6.1549e-19
Nova2	2.52e-23	-0.314395	0.084	0.339	6.4086e-19
Arhgef4	2.52982e-23	-0.271259	0.054	0.266	6.43359e-19
Fam160b2	2.66353e-23	-0.323655	0.095	0.362	6.77361e-19
Nsg2	2.73049e-23	-0.631131	0.554	0.853	6.9439e-19
Ttc39b	2.75547e-23	-0.325175	0.069	0.299	7.00743e-19
Scn1a	3.08494e-23	-0.628623	0.556	0.819	7.84532e-19
Magi1	3.35549e-23	0.758025	0.9	0.746	8.53335e-19
Zkscan16	3.40411e-23	-0.302945	0.068	0.299	8.657e-19
Scn8a	3.51937e-23	-0.498655	0.587	0.893	8.95011e-19
Clip1	3.62021e-23	-0.329266	0.13	0.441	9.20656e-19
Cttnbp2	4.04576e-23	-0.559134	0.97	1	1.02888e-18
Wnk1	4.26323e-23	0.702302	0.958	0.831	1.08418e-18
Pigk	4.77161e-23	-0.540959	0.287	0.678	1.21347e-18
Ssbp2	4.81993e-23	-0.532039	0.877	0.966	1.22576e-18
Slc25a33	4.85276e-23	-0.289816	0.064	0.288	1.2341e-18
Spock3	5.32784e-23	-0.624371	0.997	0.994	1.35492e-18
Unc80	5.59624e-23	-0.525502	0.669	0.853	1.42318e-18
Sms	5.62508e-23	-0.355945	0.12	0.418	1.43051e-18
Tiparp	6.19307e-23	-0.41431	0.071	0.299	1.57496e-18
Gm15813	7.52889e-23	-0.37687	0.08	0.322	1.91467e-18
Scn2a	1.0316e-22	-0.514062	0.745	0.921	2.62347e-18
Stox2	1.17162e-22	-0.514281	0.961	0.994	2.97955e-18
Nefm	1.2829e-22	-0.295648	0.055	0.266	3.26253e-18
Phldb1	1.42398e-22	0.774453	0.811	0.661	3.62132e-18
Tcaf1	1.59801e-22	-0.515245	0.37	0.785	4.0639e-18
Rere	1.64622e-22	0.701609	0.995	0.944	4.18651e-18
Tomm70a	1.82624e-22	-0.431557	0.27	0.684	4.6443e-18
Cplx1	1.87836e-22	-0.283504	0.063	0.282	4.77685e-18
Sema3e	2.08431e-22	-0.526436	0.118	0.395	5.30061e-18
Sh3d19	2.12993e-22	0.904172	0.734	0.537	5.41663e-18
Rbm39	2.13499e-22	0.537834	1	1	5.42949e-18
Cenpv	2.15596e-22	-0.398376	0.138	0.441	5.48281e-18
Cep70	2.22504e-22	-0.440472	0.242	0.627	5.6585e-18
Rnf165	2.29484e-22	-0.320125	0.074	0.305	5.83601e-18
Gm39326	2.29742e-22	-0.250835	0.055	0.266	5.84256e-18
Glt1d1	2.40819e-22	-0.334045	0.108	0.384	6.12428e-18
Slc38a1	2.43868e-22	-0.308519	0.08	0.322	6.2018e-18
Calcoco1	2.43926e-22	-0.366508	0.105	0.373	6.20329e-18
Arhgap23	2.50691e-22	0.764941	0.85	0.797	6.37531e-18
Epha4	2.50773e-22	-0.57898	0.446	0.791	6.37741e-18
Rmnd5b	2.90714e-22	-0.292298	0.094	0.356	7.39315e-18
4930517O19Rik	2.94721e-22	-0.33552	0.053	0.254	7.49505e-18
Nsg1	3.04838e-22	-0.429477	0.19	0.542	7.75233e-18
R3hdm4	3.29879e-22	-0.337066	0.12	0.412	8.38916e-18
Gm15563	3.47852e-22	-0.322953	0.111	0.39	8.84622e-18
Tuba1a	3.52112e-22	0.881943	0.914	0.797	8.95455e-18
Sgk3	3.67022e-22	-0.509785	0.357	0.785	9.33373e-18
Tpd52l1	3.68937e-22	-0.315666	0.059	0.271	9.38243e-18
Chst10	4.4033e-22	-0.266414	0.053	0.254	1.1198e-17
Pkp4	4.4149e-22	0.814971	0.844	0.729	1.12275e-17
Dnajc2	4.60661e-22	-0.352466	0.12	0.407	1.17151e-17
Mpped2	5.13568e-22	-0.580601	0.778	0.898	1.30606e-17
Ctnnd2	5.83262e-22	-0.47117	0.989	1	1.48329e-17
Kcnc1	5.95855e-22	-0.254517	0.053	0.254	1.51532e-17
Ina	6.84949e-22	-0.368524	0.055	0.26	1.74189e-17
Chrm1	6.9364e-22	-0.268411	0.053	0.254	1.764e-17
3110082I17Rik	7.18262e-22	-0.313273	0.069	0.294	1.82661e-17
Mrtfb	7.21823e-22	-0.454988	0.877	0.972	1.83567e-17
Ddx17	7.38843e-22	0.678121	0.951	0.864	1.87895e-17
Arhgap33	7.46194e-22	-0.352148	0.154	0.475	1.89765e-17
Gfod1	7.6462e-22	-0.434654	0.167	0.492	1.94451e-17
Gm17227	7.92671e-22	-0.343558	0.111	0.384	2.01584e-17
Apbb2	8.1466e-22	0.714408	0.94	0.859	2.07176e-17
3110039M20Rik	8.6119e-22	-0.304374	0.084	0.328	2.19009e-17
Fam219a	9.04897e-22	-0.43793	0.284	0.712	2.30124e-17
Man1a2	9.07672e-22	-0.462598	0.359	0.768	2.3083e-17
Zfp943	9.60146e-22	-0.309715	0.097	0.356	2.44175e-17
Ckmt1	9.88662e-22	-0.293651	0.069	0.294	2.51427e-17
Hecw1	1.19423e-21	-0.49849	0.265	0.605	3.03705e-17
Nnat	1.25527e-21	-0.613915	0.105	0.362	3.19228e-17
Ccdc106	1.30282e-21	-0.298234	0.082	0.322	3.3132e-17
Ttc3	1.35976e-21	-0.486043	0.968	0.994	3.45802e-17
Rab36	1.36455e-21	-0.280747	0.062	0.277	3.47019e-17
Srsf9	1.46338e-21	-0.327738	0.109	0.379	3.72153e-17
Hras	1.60796e-21	-0.443814	0.177	0.508	4.08921e-17
Atp8a2	1.62676e-21	-0.494819	0.338	0.689	4.137e-17
Ptprt	1.6542e-21	-0.520223	0.302	0.638	4.2068e-17
Rasgrf1	1.79316e-21	-0.565898	0.414	0.734	4.5602e-17
Gm30382	1.85458e-21	-0.436658	0.073	0.299	4.71639e-17
Plp1	2.0046e-21	0.549635	0.999	1	5.0979e-17
Map7	2.06956e-21	0.659842	0.99	0.966	5.2631e-17
Trim37	2.33066e-21	-0.380028	0.17	0.503	5.92711e-17
Enc1	2.86411e-21	-0.283317	0.059	0.266	7.28372e-17
Kctd8	3.06025e-21	-0.990595	0.457	0.729	7.78251e-17
Luc7l3	3.15639e-21	0.670567	0.927	0.785	8.02701e-17
Zfp804a	3.19238e-21	-0.654627	0.497	0.768	8.11853e-17
Prkci	3.76135e-21	-0.304306	0.101	0.362	9.56549e-17
Synpr	4.06449e-21	-0.558345	0.217	0.565	1.03364e-16
Nedd4l	4.11031e-21	-0.511116	0.806	0.96	1.04529e-16
Fut9	4.23276e-21	-0.571577	0.585	0.842	1.07643e-16
Acvr1	5.27616e-21	-0.407946	0.195	0.537	1.34178e-16
Sorcs1	5.91702e-21	0.739376	0.992	0.966	1.50476e-16
Caly	6.12764e-21	-0.500489	0.403	0.791	1.55832e-16
Rtn4	6.5268e-21	0.606654	0.995	0.983	1.65983e-16
Svil	6.97633e-21	-0.314341	0.071	0.294	1.77415e-16
Ppip5k1	7.39346e-21	-0.399707	0.199	0.548	1.88023e-16
Tmem201	8.23669e-21	-0.260335	0.055	0.254	2.09467e-16
Slc6a6	8.33156e-21	-0.580504	0.642	0.938	2.1188e-16
Spag9	9.12642e-21	0.660456	0.982	0.949	2.32094e-16
Spred1	9.93273e-21	-0.535242	0.423	0.814	2.52599e-16
Pkd1	1.02477e-20	-0.380371	0.231	0.616	2.60609e-16
Pcgf5	1.10026e-20	-0.431078	0.111	0.367	2.79807e-16
Fam171a1	1.25955e-20	-0.429702	0.268	0.655	3.20317e-16
Ryr2	1.26765e-20	-0.70519	0.62	0.814	3.22377e-16
Prkn	1.28515e-20	0.739195	0.99	0.966	3.26827e-16
Sfxn1	1.32553e-20	-0.266075	0.059	0.26	3.37095e-16
Mtmr7	1.36708e-20	-0.368619	0.116	0.384	3.47661e-16
Lamp5	1.46961e-20	-0.260911	0.063	0.271	3.73736e-16
Dym	1.69047e-20	-0.360905	0.292	0.718	4.29902e-16
Nrsn2	1.71615e-20	-0.359234	0.09	0.328	4.36433e-16
Ncs1	1.84286e-20	-0.270383	0.073	0.294	4.68658e-16
Gga2	1.89505e-20	-0.254283	0.056	0.254	4.8193e-16
Slc32a1	1.97132e-20	-0.371834	0.132	0.418	5.01326e-16
Pacsin1	2.05412e-20	-0.424961	0.343	0.757	5.22383e-16
Ttc7	2.29495e-20	-0.255456	0.061	0.266	5.83628e-16
Maml3	2.32266e-20	-0.45965	0.143	0.429	5.90675e-16
Epb41l1	2.3343e-20	-0.416556	0.35	0.78	5.93636e-16
Zmym3	2.3896e-20	-0.281784	0.122	0.407	6.077e-16
Gnaq	2.50701e-20	0.661515	0.88	0.729	6.37558e-16
Neat1	2.75382e-20	0.870383	0.891	0.825	7.00324e-16
Prkab2	3.07484e-20	-0.297524	0.081	0.311	7.81962e-16
Adam23	3.68241e-20	-0.481354	0.828	0.932	9.36473e-16
Ldlrad4	4.03049e-20	-0.717028	0.772	0.91	1.02499e-15
Kcnb2	4.19154e-20	-0.754892	0.592	0.774	1.06595e-15
Fam20c	4.21492e-20	-0.259513	0.078	0.305	1.0719e-15
Ago2	4.26787e-20	-0.376519	0.129	0.401	1.08536e-15
Insyn1	4.69468e-20	-0.279688	0.06	0.26	1.1939e-15
Vgf	5.26418e-20	-0.353317	0.078	0.299	1.33873e-15
Kdm7a	5.43128e-20	-0.383821	0.159	0.463	1.38123e-15
Inf2	5.5416e-20	-0.612778	0.555	0.915	1.40928e-15
Rap2b	5.98567e-20	-0.278546	0.089	0.328	1.52222e-15
Ppp1r37	6.01956e-20	-0.299531	0.093	0.333	1.53083e-15
Lingo1	6.6504e-20	-0.323589	0.08	0.305	1.69126e-15
Cpne8	7.01798e-20	-0.333639	0.066	0.271	1.78474e-15
Hcn1	7.07511e-20	-0.37732	0.146	0.441	1.79927e-15
Fkbp5	7.36951e-20	-0.280042	0.075	0.294	1.87414e-15
Tmem263	7.79358e-20	-0.268949	0.079	0.305	1.98199e-15
Dgat2	8.13177e-20	-0.319679	0.107	0.362	2.06799e-15
Hsph1	8.5974e-20	-0.319272	0.131	0.412	2.18641e-15
Gtpbp1	8.83837e-20	-0.272903	0.077	0.299	2.24769e-15
Mir124-2hg	9.06267e-20	-0.316334	0.132	0.418	2.30473e-15
Hace1	9.58728e-20	-0.439785	0.315	0.706	2.43814e-15
Wrb	9.68025e-20	-0.276269	0.072	0.288	2.46178e-15
Limch1	1.03401e-19	0.678946	0.979	0.921	2.62958e-15
Ajm1	1.06086e-19	-0.263149	0.075	0.294	2.69787e-15
Pptc7	1.06106e-19	-0.309621	0.122	0.395	2.69839e-15
Chsy3	1.29883e-19	-0.526393	0.793	0.904	3.30306e-15
Ppp1r7	1.37846e-19	-0.358006	0.164	0.469	3.50557e-15
Lyst	1.71048e-19	-0.410552	0.327	0.734	4.34993e-15
Pdxk	1.77098e-19	-0.348168	0.088	0.316	4.50377e-15
Ppp1r13b	1.79415e-19	-0.42628	0.291	0.684	4.56271e-15
Ephx4	2.01349e-19	-0.312031	0.118	0.384	5.1205e-15
Dnaja1	2.22584e-19	-0.437172	0.328	0.746	5.66053e-15
Dtnbp1	2.37359e-19	-0.315013	0.11	0.367	6.03629e-15
Vstm2l	2.68364e-19	-0.25868	0.078	0.299	6.82476e-15
Tceal5	2.78202e-19	-0.303313	0.103	0.35	7.07495e-15
Anln	2.97473e-19	0.977402	0.675	0.458	7.56504e-15
Gphn	3.00894e-19	0.583811	1	1	7.65203e-15
Luzp2	3.23861e-19	1.15141	0.504	0.169	8.23611e-15
Unc5d	3.71628e-19	-0.882137	0.089	0.311	9.45086e-15
Plekhg1	3.72286e-19	0.812749	0.729	0.554	9.46761e-15
Gm10863	3.90981e-19	0.866441	0.554	0.237	9.94303e-15
Cnih2	4.12462e-19	-0.327738	0.098	0.339	1.04893e-14
Rbms3	4.66855e-19	-0.597645	0.628	0.819	1.18726e-14
Evi5	5.06603e-19	-0.295262	0.095	0.333	1.28834e-14
Scn1b	5.2546e-19	-0.322092	0.098	0.339	1.3363e-14
Fam78b	5.41173e-19	-0.31018	0.081	0.299	1.37626e-14
Fbxo33	5.46049e-19	-0.319741	0.102	0.345	1.38866e-14
Trio	5.87951e-19	-0.474562	0.497	0.774	1.49522e-14
Rcor1	6.08871e-19	-0.345838	0.136	0.412	1.54842e-14
Snrnp70	6.65298e-19	0.50957	0.996	0.983	1.69192e-14
St3gal5	7.62458e-19	-0.352804	0.149	0.435	1.93901e-14
Tmcc3	7.96829e-19	0.800079	0.777	0.706	2.02642e-14
Zswim6	8.05445e-19	-0.544722	0.922	0.949	2.04833e-14
Pfkm	8.27408e-19	-0.29044	0.079	0.294	2.10418e-14
Gba2	8.51427e-19	-0.289914	0.086	0.311	2.16527e-14
Rpgr	1.01766e-18	-0.32637	0.194	0.531	2.58801e-14
Ccdc149	1.04782e-18	-0.260624	0.061	0.254	2.66472e-14
Stau2	1.12637e-18	-0.430675	0.366	0.74	2.86448e-14
Gpr155	1.42262e-18	-0.576813	0.244	0.559	3.61787e-14
Fbxl2	1.52804e-18	-0.407255	0.24	0.582	3.88597e-14
Arid4b	1.63718e-18	0.649872	0.89	0.853	4.16352e-14
Exoc6b	1.66659e-18	0.638653	0.974	0.876	4.2383e-14
Gm11906	1.84908e-18	-0.285772	0.084	0.305	4.70241e-14
4930567K12Rik	1.91045e-18	-0.307028	0.091	0.316	4.85847e-14
Cnst	2.02475e-18	-0.382241	0.156	0.435	5.14915e-14
Eef1a1	2.05278e-18	0.647049	0.933	0.859	5.22042e-14
Gm5577	2.39289e-18	-0.272597	0.062	0.254	6.08535e-14
Shb	2.42786e-18	-0.306969	0.14	0.412	6.17428e-14
Mmd	2.87381e-18	-0.295201	0.07	0.271	7.3084e-14
Aig1	2.96386e-18	0.690588	0.887	0.785	7.53739e-14
Zswim5	3.05454e-18	-0.346536	0.195	0.525	7.768e-14
Nkain3	3.06858e-18	-0.616158	0.355	0.644	7.80371e-14
Wdr47	3.16653e-18	-0.350741	0.168	0.463	8.05279e-14
Nexmif	3.29536e-18	-0.315425	0.084	0.299	8.38042e-14
Fth1	3.58813e-18	0.725939	0.994	0.989	9.12498e-14
Ubxn11	4.2918e-18	-0.321287	0.103	0.339	1.09145e-13
Zfhx3	4.40649e-18	-0.665359	0.369	0.684	1.12061e-13
Slc12a2	4.97718e-18	0.69441	0.795	0.763	1.26575e-13
Ttc9b	5.23611e-18	-0.273744	0.068	0.266	1.3316e-13
Mgat4c	5.93704e-18	-0.53778	0.893	0.876	1.50985e-13
Mrtfa	6.16869e-18	-0.366828	0.234	0.588	1.56876e-13
Bcl2	6.2366e-18	-0.32272	0.074	0.277	1.58603e-13
Igsf9b	6.55883e-18	-0.325277	0.094	0.316	1.66798e-13
Fbxo10	6.73877e-18	-0.279993	0.083	0.299	1.71374e-13
Frrs1l	6.79936e-18	-0.327738	0.114	0.362	1.72915e-13
Abcb9	7.11956e-18	-0.286431	0.082	0.294	1.81057e-13
Atp6v1g2	7.41336e-18	-0.337031	0.122	0.379	1.88529e-13
Foxo3	7.84253e-18	-0.373868	0.15	0.424	1.99443e-13
Gm26871	8.26564e-18	-0.467542	0.777	0.87	2.10203e-13
Frmd4b	8.36079e-18	0.637496	0.965	0.944	2.12623e-13
Mllt6	9.69763e-18	-0.263646	0.086	0.305	2.46621e-13
Acp1	9.84996e-18	-0.557273	0.601	0.887	2.50494e-13
Agrp	1.06738e-17	-0.253514	0.066	0.26	2.71445e-13
Sfxn5	1.09651e-17	-0.353231	0.102	0.333	2.78853e-13
Fbf1	1.10639e-17	-0.250307	0.064	0.254	2.81366e-13
Far2	1.12176e-17	-0.295134	0.098	0.328	2.85274e-13
Lpcat4	1.12725e-17	-0.271121	0.069	0.266	2.86672e-13
Sytl5	1.32303e-17	-0.340428	0.1	0.328	3.36461e-13
Grid2	1.37276e-17	0.544471	1	1	3.49106e-13
Fbxw7	1.45348e-17	-0.308888	0.232	0.593	3.69633e-13
Tmem132d	1.48655e-17	0.950417	0.559	0.271	3.78044e-13
Ttll7	1.5284e-17	0.617112	0.965	0.938	3.88688e-13
Lrrc4c	1.64951e-17	0.54608	1	1	4.19486e-13
Adar	1.71295e-17	-0.332956	0.15	0.424	4.35621e-13
C2cd2	1.91406e-17	-0.367983	0.169	0.458	4.86763e-13
Syn2	2.08021e-17	-0.531638	0.623	0.814	5.29017e-13
Ccl27a	2.15178e-17	-0.257518	0.069	0.266	5.47219e-13
Ablim2	2.17646e-17	-0.44004	0.872	0.972	5.53497e-13
Atp8a1	2.23537e-17	0.521689	0.991	0.994	5.68477e-13
Pnn	2.30001e-17	0.636547	0.86	0.701	5.84916e-13
A330102I10Rik	2.35819e-17	-0.30433	0.109	0.35	5.99712e-13
Pantr1	2.42251e-17	-0.347144	0.142	0.412	6.16069e-13
Actb	2.44658e-17	0.738485	0.993	0.983	6.22189e-13
Brk1	2.57695e-17	-0.374209	0.231	0.565	6.55343e-13
Zmat3	2.59945e-17	-0.291109	0.103	0.333	6.61066e-13
Agap1	2.66094e-17	0.609378	0.955	0.864	6.76704e-13
Chd3	2.88932e-17	-0.313738	0.186	0.497	7.34782e-13
Abl2	2.90064e-17	-0.36419	0.289	0.661	7.37661e-13
Abhd2	2.97116e-17	-0.374203	0.183	0.48	7.55595e-13
Zdbf2	3.10949e-17	-0.401781	0.069	0.26	7.90776e-13
Gm26542	3.13397e-17	-0.373288	0.092	0.311	7.97e-13
Irak1bp1	3.54998e-17	-0.257308	0.08	0.288	9.02797e-13
Pfkfb3	3.66387e-17	-0.264423	0.085	0.299	9.31759e-13
Lpin2	4.53753e-17	-0.266192	0.078	0.282	1.15394e-12
Cdk9	4.60759e-17	-0.269431	0.09	0.305	1.17176e-12
Vstm2a	4.71157e-17	-0.257597	0.075	0.277	1.1982e-12
Mgat4a	4.81056e-17	-0.253827	0.068	0.26	1.22337e-12
Sept4	4.81748e-17	0.65307	0.889	0.87	1.22513e-12
Cpt1c	5.08707e-17	-0.362504	0.248	0.588	1.29369e-12
Nfasc	5.61676e-17	0.648718	0.893	0.853	1.4284e-12
Hnrnpa2b1	6.15045e-17	0.581059	0.975	0.898	1.56412e-12
Zbtb17	6.2587e-17	-0.277319	0.091	0.305	1.59165e-12
Opcml	6.27593e-17	-0.608132	0.985	0.949	1.59603e-12
Gm16599	6.30859e-17	-0.381214	0.199	0.508	1.60434e-12
Dmxl2	6.54306e-17	-0.352993	0.309	0.689	1.66397e-12
Sytl2	6.83378e-17	0.769047	0.728	0.593	1.7379e-12
Ogt	6.91895e-17	0.519872	0.965	0.881	1.75956e-12
Crtc1	7.41719e-17	-0.283787	0.122	0.367	1.88627e-12
Tasp1	7.62354e-17	-0.301185	0.262	0.633	1.93874e-12
Fmnl2	7.65063e-17	0.883409	0.723	0.627	1.94563e-12
Metap1d	8.21018e-17	0.889545	0.576	0.373	2.08793e-12
Kif5c	1.0481e-16	-0.37651	0.305	0.672	2.66543e-12
Ube4b	1.05351e-16	-0.345462	0.296	0.678	2.67917e-12
Socs7	1.05699e-16	-0.309339	0.112	0.345	2.68804e-12
Fam184a	1.08262e-16	-0.343389	0.239	0.582	2.75322e-12
Usp28	1.13404e-16	-0.352011	0.138	0.39	2.88399e-12
Aco2	1.18529e-16	-0.38065	0.299	0.672	3.0143e-12
Ociad2	1.19046e-16	-0.298709	0.083	0.288	3.02747e-12
Pbx1	1.28224e-16	-0.386416	0.862	0.921	3.26086e-12
Gtf2ird1	1.28425e-16	-0.323955	0.141	0.401	3.26598e-12
Alk	1.29541e-16	0.826056	0.376	0.056	3.29436e-12
Asphd2	1.31255e-16	-0.293791	0.095	0.311	3.33794e-12
4930402H24Rik	1.32128e-16	0.555347	0.972	0.887	3.36015e-12
Enpp6	1.32881e-16	0.792572	0.581	0.299	3.37929e-12
Ergic1	1.34118e-16	-0.279446	0.122	0.367	3.41075e-12
Khsrp	1.35144e-16	-0.333725	0.145	0.412	3.43685e-12
Msra	1.381e-16	-0.477981	0.484	0.785	3.51203e-12
Fam214a	1.4389e-16	-0.350952	0.289	0.661	3.65926e-12
Ccni	1.61109e-16	-0.315099	0.153	0.424	4.09716e-12
Ube3a	1.67011e-16	-0.385906	0.98	0.994	4.24725e-12
Lsamp	1.72484e-16	-0.437674	0.997	1	4.38645e-12
Nt5c2	1.73198e-16	-0.335074	0.285	0.65	4.40459e-12
Pak7	1.8158e-16	0.657366	0.954	0.898	4.61775e-12
Plekhh1	1.88072e-16	0.659323	0.756	0.571	4.78285e-12
Utp4	1.89171e-16	-0.263382	0.08	0.282	4.8108e-12
Rmnd5a	1.898e-16	-0.36854	0.241	0.576	4.8268e-12
Cap1	1.92834e-16	-0.353507	0.281	0.638	4.90396e-12
Slc25a23	1.99632e-16	-0.370885	0.211	0.525	5.07684e-12
Gm42439	2.05533e-16	-0.382268	0.322	0.701	5.22691e-12
Cdc42bpa	2.13582e-16	0.576294	0.989	0.972	5.4316e-12
1810034E14Rik	2.25333e-16	-0.283787	0.108	0.339	5.73043e-12
Fryl	2.38749e-16	0.643726	0.815	0.757	6.07162e-12
Slc44a1	2.40801e-16	0.672493	0.839	0.859	6.1238e-12
Abi2	2.45706e-16	-0.408802	0.586	0.881	6.24856e-12
Pgbd5	2.46168e-16	-0.363253	0.152	0.412	6.2603e-12
C79798	2.48413e-16	-0.30793	0.091	0.299	6.31739e-12
G630016G05Rik	2.5017e-16	-0.251722	0.08	0.282	6.36206e-12
Skil	2.58366e-16	-0.320539	0.105	0.328	6.57051e-12
Zdhhc2	2.62117e-16	-0.357167	0.147	0.407	6.6659e-12
Tusc3	2.95369e-16	-0.470534	0.557	0.825	7.51154e-12
Sh3gl2	2.97421e-16	-0.317538	0.205	0.514	7.56372e-12
Napb	3.02277e-16	-0.281509	0.154	0.429	7.68721e-12
Agap3	3.15277e-16	-0.294055	0.116	0.35	8.0178e-12
Slc25a14	3.21121e-16	-0.267929	0.099	0.316	8.16642e-12
Mmp16	3.49098e-16	-0.432139	0.679	0.842	8.87791e-12
Zfp236	3.67257e-16	-0.271127	0.186	0.486	9.3397e-12
Cntn2	3.8403e-16	0.760753	0.621	0.435	9.76626e-12
Itsn1	3.87496e-16	-0.289684	0.235	0.582	9.85442e-12
Gpr45	4.46909e-16	-0.270383	0.069	0.254	1.13654e-11
Smg5	5.10446e-16	-0.3415	0.224	0.548	1.29812e-11
Slc8a3	5.13687e-16	-0.333997	0.348	0.746	1.30636e-11
Atg16l2	5.32709e-16	-0.257389	0.095	0.311	1.35473e-11
Zdhhc20	5.68491e-16	0.65112	0.884	0.836	1.44573e-11
D030068K23Rik	5.97635e-16	-0.282651	0.077	0.271	1.51984e-11
Cyld	6.39783e-16	-0.437466	0.775	0.944	1.62703e-11
Tspyl2	6.40703e-16	-0.284237	0.118	0.35	1.62937e-11
Tmod1	6.81864e-16	-0.367997	0.272	0.616	1.73405e-11
Arhgef10	8.01036e-16	0.737384	0.627	0.418	2.03711e-11
Xkr6	8.46643e-16	-0.406369	0.63	0.881	2.1531e-11
Gm15594	8.69036e-16	-0.369405	0.132	0.373	2.21004e-11
Elovl7	9.34199e-16	0.770488	0.637	0.458	2.37576e-11
Large1	9.72863e-16	-0.370301	0.878	0.938	2.47409e-11
Trpm3	9.78313e-16	-0.774019	0.267	0.52	2.48795e-11
Son	1.02703e-15	0.473333	0.999	1	2.61184e-11
Nell2	1.05233e-15	-0.405852	0.491	0.791	2.67618e-11
Rtn1	1.07631e-15	-0.399546	0.949	0.972	2.73715e-11
Cyp7b1	1.08518e-15	-0.337547	0.089	0.288	2.75971e-11
Gm48370	1.20259e-15	-0.276503	0.089	0.294	3.0583e-11
C1qtnf4	1.20806e-15	-0.478661	0.51	0.797	3.07222e-11
Rsrp1	1.28402e-15	0.452637	0.994	0.96	3.26539e-11
Lonrf2	1.34823e-15	-0.253567	0.097	0.311	3.42868e-11
Hdgf	1.37675e-15	-0.319953	0.13	0.367	3.50122e-11
Gpm6a	1.53302e-15	-0.362383	0.853	0.955	3.89862e-11
Hapln2	1.53458e-15	0.871706	0.684	0.52	3.90258e-11
Cbx6	1.7378e-15	-0.319366	0.142	0.39	4.41941e-11
Helz	1.78362e-15	-0.296626	0.235	0.565	4.53592e-11
Map3k12	1.78659e-15	-0.325353	0.113	0.333	4.54347e-11
Pafah1b1	1.80092e-15	0.530356	0.98	0.949	4.57992e-11
Cpox	1.81816e-15	0.793924	0.622	0.424	4.62377e-11
Etl4	2.01808e-15	-0.571489	0.6	0.763	5.13219e-11
Med12l	2.17939e-15	-0.298681	0.266	0.61	5.54239e-11
Pou6f1	2.30573e-15	-0.268813	0.12	0.356	5.86371e-11
Map3k10	2.30658e-15	-0.277112	0.089	0.288	5.86587e-11
Cyth1	2.31278e-15	0.733392	0.642	0.469	5.88163e-11
Gpcpd1	2.38431e-15	-0.308812	0.305	0.684	6.06354e-11
Arhgef9	2.7336e-15	-0.446282	0.707	0.881	6.95182e-11
Dip2a	2.76928e-15	0.750378	0.613	0.441	7.04256e-11
8030462N17Rik	2.77739e-15	-0.290231	0.252	0.605	7.06317e-11
Thsd4	2.92261e-15	-0.314376	0.113	0.333	7.43248e-11
Ap3s1	2.96016e-15	-0.29619	0.109	0.328	7.52797e-11
Srgap1	3.18043e-15	-0.48533	0.655	0.887	8.08815e-11
Ccm2	3.43335e-15	-0.359399	0.149	0.395	8.73134e-11
Rps6ka3	3.566e-15	-0.408562	0.507	0.814	9.06871e-11
Mdga2	3.63378e-15	0.547162	1	1	9.24107e-11
Ptprj	4.21006e-15	-0.370324	0.355	0.706	1.07066e-10
Map4	4.21786e-15	0.639106	0.79	0.797	1.07264e-10
Wdr17	4.30664e-15	-0.398817	0.54	0.791	1.09522e-10
Rev1	4.73245e-15	-0.366563	0.352	0.718	1.20351e-10
Srpk1	4.89358e-15	-0.331733	0.218	0.52	1.24449e-10
Ralgps1	4.9295e-15	0.614256	0.824	0.791	1.25362e-10
Dtx3	5.10839e-15	-0.348063	0.257	0.582	1.29911e-10
Reep2	5.25742e-15	-0.268459	0.073	0.254	1.33701e-10
Nrxn1	5.27963e-15	-0.397093	0.979	0.994	1.34266e-10
Ctdnep1	5.67113e-15	-0.251607	0.073	0.254	1.44223e-10
Dusp15	6.19583e-15	0.827054	0.55	0.316	1.57566e-10
Uhrf1bp1l	6.28589e-15	-0.278457	0.124	0.356	1.59856e-10
Stard13	6.37921e-15	0.769735	0.605	0.384	1.6223e-10
Hmgcr	7.2211e-15	-0.254675	0.129	0.367	1.8364e-10
Abi1	7.62056e-15	-0.353988	0.395	0.814	1.93798e-10
Fnbp1	8.0462e-15	0.531572	0.97	0.983	2.04623e-10
Impa1	9.04956e-15	-0.255891	0.112	0.333	2.30139e-10
Zfp1	9.12466e-15	-0.260624	0.206	0.514	2.32049e-10
Dab2ip	9.24557e-15	-0.375526	0.154	0.395	2.35124e-10
Fam210a	1.05339e-14	-0.271155	0.12	0.345	2.67888e-10
Dph6	1.07078e-14	-0.294715	0.264	0.605	2.72309e-10
Scrn1	1.1791e-14	-0.397329	0.277	0.588	2.99858e-10
Ncdn	1.19694e-14	-0.343941	0.208	0.497	3.04394e-10
Fam126b	1.21969e-14	-0.256463	0.223	0.542	3.10179e-10
Ppp3cb	1.22253e-14	-0.32078	0.257	0.588	3.10902e-10
Nckap5	1.22295e-14	0.813001	0.391	0.107	3.11009e-10
Gm1673	1.27131e-14	-0.267667	0.109	0.328	3.23307e-10
Ptpn12	1.30827e-14	-0.281935	0.163	0.429	3.32706e-10
Cdk17	1.445e-14	-0.47251	0.747	0.904	3.67479e-10
Luzp1	1.46979e-14	-0.284715	0.132	0.373	3.73782e-10
Gtf2h2	1.6311e-14	-0.272029	0.127	0.356	4.14805e-10
Clasp1	1.64233e-14	-0.328341	0.296	0.638	4.17661e-10
Foxp2	1.69142e-14	-0.82131	0.671	0.757	4.30144e-10
Pnmal2	1.78132e-14	-0.279521	0.097	0.299	4.53008e-10
Ankrd45	1.84668e-14	-0.255589	0.078	0.26	4.6963e-10
Tnrc18	1.88955e-14	-0.301937	0.169	0.435	4.80532e-10
Tmem117	1.88979e-14	0.858314	0.67	0.588	4.80593e-10
Fzd3	2.002e-14	-0.297812	0.116	0.333	5.09128e-10
Epb41l3	2.03337e-14	0.638091	0.876	0.847	5.17106e-10
Garnl3	2.04367e-14	-0.282183	0.182	0.458	5.19725e-10
Ndfip2	2.1084e-14	-0.466818	0.452	0.797	5.36188e-10
Prkca	2.30399e-14	0.586458	0.869	0.74	5.85927e-10
Cdyl2	2.44105e-14	-0.278856	0.112	0.328	6.20784e-10
Tra2a	2.46953e-14	0.536845	0.959	0.836	6.28027e-10
Mef2c	2.53343e-14	-0.505384	0.523	0.757	6.44277e-10
Ppia	2.5686e-14	0.529657	0.986	0.938	6.53219e-10
Pcdh15	2.60561e-14	0.975248	0.558	0.345	6.62634e-10
Sgcd	2.74807e-14	-0.585963	0.527	0.718	6.98862e-10
Peg3	2.86475e-14	-0.409093	0.379	0.695	7.28534e-10
Cmtm5	2.96259e-14	0.638352	0.777	0.701	7.53415e-10
Ube2e2	3.61825e-14	0.586053	0.995	0.983	9.20157e-10
Sesn1	3.83201e-14	-0.320145	0.34	0.718	9.74518e-10
Gm4221	3.90471e-14	0.779553	0.502	0.254	9.93006e-10
Aatk	4.05725e-14	0.591506	0.782	0.729	1.0318e-09
Tecr	4.16023e-14	0.59935	0.884	0.774	1.05799e-09
Dynll1	4.21787e-14	-0.387558	0.344	0.718	1.07265e-09
Mprip	4.27597e-14	-0.403996	0.623	0.898	1.08742e-09
Syn1	4.29824e-14	-0.29343	0.163	0.418	1.09309e-09
Stxbp3	4.31206e-14	0.697084	0.609	0.446	1.0966e-09
Khdrbs3	4.33391e-14	-0.328531	0.106	0.311	1.10216e-09
Hebp1	4.35387e-14	-0.267197	0.11	0.322	1.10723e-09
Pcsk7	4.47382e-14	-0.325745	0.21	0.497	1.13774e-09
Gm48091	4.51948e-14	-0.315713	0.104	0.305	1.14935e-09
Foxn3	4.53729e-14	0.623302	0.785	0.746	1.15388e-09
Ssh2	4.5414e-14	0.627313	0.924	0.842	1.15492e-09
Stxbp6	4.71745e-14	0.745542	0.651	0.48	1.1997e-09
Atp1a3	4.90357e-14	-0.447556	0.509	0.763	1.24703e-09
Bhlhe41	5.09209e-14	-0.275991	0.154	0.401	1.29497e-09
Wls	5.11273e-14	0.772198	0.523	0.299	1.30022e-09
Fam172a	5.24688e-14	0.602589	0.918	0.836	1.33433e-09
Jph4	5.32381e-14	-0.283323	0.21	0.503	1.3539e-09
Brms1	5.40295e-14	-0.289117	0.131	0.356	1.37402e-09
Angel2	5.47884e-14	-0.290855	0.263	0.599	1.39332e-09
Pcbp3	5.47953e-14	-0.259373	0.14	0.379	1.3935e-09
Nr1d2	5.75345e-14	-0.337046	0.218	0.508	1.46316e-09
Hepacam	5.90892e-14	0.644838	0.702	0.582	1.5027e-09
Mycbp2	6.42108e-14	0.440487	0.999	1	1.63295e-09
Slf2	6.67941e-14	-0.330172	0.287	0.616	1.69864e-09
Vrk1	6.72632e-14	-0.312403	0.111	0.316	1.71057e-09
Ercc6	6.93188e-14	-0.251943	0.104	0.305	1.76285e-09
Wasf1	6.96449e-14	-0.385072	0.363	0.712	1.77114e-09
Slc9a9	7.22317e-14	0.748817	0.556	0.35	1.83692e-09
Apc	7.6214e-14	0.503147	0.965	0.881	1.9382e-09
Celf4	7.66239e-14	-0.486716	0.714	0.797	1.94862e-09
Sptan1	7.69086e-14	-0.399436	0.392	0.701	1.95586e-09
Gm40841	8.28542e-14	-0.31482	0.132	0.356	2.10706e-09
Slc35e2	8.49531e-14	-0.261626	0.152	0.395	2.16044e-09
Emc3	8.73042e-14	-0.301431	0.2	0.48	2.22023e-09
Map3k13	8.88619e-14	-0.297681	0.171	0.429	2.25985e-09
Zc2hc1a	9.98144e-14	-0.267731	0.13	0.356	2.53838e-09
Gpr176	1.02739e-13	-0.257308	0.08	0.26	2.61276e-09
Tenm3	1.04308e-13	-0.492373	0.757	0.791	2.65265e-09
Bex2	1.14526e-13	-0.372434	0.331	0.667	2.9125e-09
4930509J09Rik	1.17577e-13	-0.27751	0.095	0.288	2.99009e-09
Znrf3	1.20845e-13	-0.315321	0.214	0.497	3.07322e-09
Rnf13	1.34973e-13	0.576357	0.848	0.831	3.43249e-09
Tomm40	1.48189e-13	-0.287545	0.156	0.395	3.76859e-09
Vav3	1.55491e-13	-0.269322	0.087	0.271	3.95428e-09
Gm28198	1.61952e-13	-0.2966	0.161	0.407	4.1186e-09
Fdx2	1.64084e-13	-0.259006	0.105	0.305	4.17282e-09
Sub1	1.64972e-13	-0.369295	0.217	0.492	4.1954e-09
Arpc2	1.68304e-13	-0.320456	0.329	0.684	4.28014e-09
Ppp1r14a	1.7131e-13	0.633554	0.77	0.672	4.35657e-09
Dnaja2	1.83808e-13	-0.361438	0.38	0.768	4.67442e-09
Fkbp2	1.99199e-13	-0.330417	0.203	0.48	5.06583e-09
Cacnb4	2.04109e-13	-0.368175	0.959	0.983	5.1907e-09
Mbd2	2.06872e-13	-0.380693	0.235	0.508	5.26096e-09
Dnajb4	2.23952e-13	-0.301537	0.219	0.508	5.69531e-09
Ppp1ca	2.24531e-13	-0.350361	0.197	0.458	5.71004e-09
Gtf3c1	2.38433e-13	-0.315782	0.23	0.52	6.06359e-09
Timm9	2.41441e-13	-0.257776	0.222	0.525	6.1401e-09
Sh3glb2	2.42504e-13	-0.29108	0.162	0.407	6.16712e-09
Pcdh7	2.77911e-13	-0.391648	0.857	0.864	7.06756e-09
Calm2	3.01882e-13	-0.457504	0.977	0.989	7.67716e-09
Gnptg	3.04826e-13	-0.284554	0.248	0.559	7.75203e-09
Rcan2	3.17026e-13	-0.434466	0.719	0.904	8.0623e-09
Dok6	3.44063e-13	-0.414757	0.745	0.814	8.74987e-09
Sccpdh	3.70158e-13	0.713495	0.576	0.373	9.41349e-09
Ahcyl1	3.8764e-13	-0.3167	0.354	0.729	9.85807e-09
Itch	4.15923e-13	0.557248	0.819	0.757	1.05773e-08
Nkap	4.55685e-13	-0.281296	0.138	0.362	1.15885e-08
Wnk3	4.56607e-13	-0.258227	0.107	0.305	1.1612e-08
Gmcl1	4.6015e-13	-0.367077	0.389	0.712	1.17021e-08
Bbs2	4.83244e-13	-0.258476	0.111	0.311	1.22894e-08
Kif13b	4.96818e-13	0.610727	0.814	0.808	1.26346e-08
Tjp1	5.0138e-13	0.565159	0.975	0.949	1.27506e-08
Tgfa	5.72583e-13	-0.282034	0.268	0.588	1.45614e-08
Ddr1	5.79979e-13	0.636542	0.614	0.435	1.47495e-08
Thy1	5.8543e-13	-0.264232	0.161	0.407	1.48881e-08
Sik3	5.9087e-13	0.522457	0.99	0.977	1.50264e-08
Dlg1	5.97451e-13	0.487829	0.962	0.876	1.51938e-08
Sergef	6.48381e-13	-0.287715	0.123	0.333	1.6489e-08
Wdr37	6.58871e-13	-0.304616	0.28	0.61	1.67557e-08
Zc3h14	6.66295e-13	-0.251458	0.17	0.424	1.69445e-08
Pla2g3	6.95019e-13	-0.293445	0.192	0.458	1.7675e-08
Akap11	7.62914e-13	-0.280134	0.383	0.768	1.94017e-08
Cdc14b	7.75991e-13	-0.261378	0.135	0.356	1.97342e-08
Neo1	8.31636e-13	0.662193	0.728	0.712	2.11493e-08
Gm19500	8.68684e-13	0.683666	0.577	0.379	2.20915e-08
Hmbox1	8.82707e-13	-0.27576	0.296	0.638	2.24481e-08
Mark2	9.13019e-13	-0.384303	0.433	0.763	2.3219e-08
Ptn	9.20972e-13	0.540348	0.923	0.853	2.34212e-08
Dbndd2	9.63871e-13	0.573585	0.863	0.887	2.45122e-08
Casc4	9.66336e-13	-0.325512	0.406	0.729	2.45749e-08
Mcu	9.88365e-13	-0.283423	0.247	0.548	2.51351e-08
Pdhb	9.92245e-13	-0.301837	0.158	0.395	2.52338e-08
Bex3	1.03915e-12	-0.289986	0.317	0.667	2.64267e-08
Ttc7b	1.06829e-12	-0.263343	0.313	0.667	2.71678e-08
Zfp318	1.07759e-12	-0.267667	0.119	0.322	2.74042e-08
S100b	1.08989e-12	0.788259	0.484	0.243	2.7717e-08
Gap43	1.10853e-12	-0.306799	0.303	0.621	2.81911e-08
Lrrc49	1.12076e-12	-0.296473	0.235	0.525	2.85021e-08
Zfand6	1.14596e-12	0.700626	0.574	0.424	2.91429e-08
Ccdc187	1.29885e-12	-0.253356	0.103	0.294	3.30312e-08
Ski	1.41219e-12	-0.255149	0.152	0.384	3.59133e-08
Rbfox2	1.42844e-12	-0.330219	0.74	0.91	3.63266e-08
Fgfr2	1.43792e-12	0.419435	0.995	0.983	3.65678e-08
Ogfrl1	1.48521e-12	-0.272527	0.134	0.35	3.77704e-08
A230001M10Rik	1.4877e-12	0.746245	0.62	0.48	3.78337e-08
Ice1	1.53479e-12	-0.252021	0.324	0.689	3.90311e-08
Tsc22d1	1.59516e-12	-0.373466	0.555	0.819	4.05666e-08
Eps15l1	1.6598e-12	-0.303462	0.347	0.706	4.22103e-08
Klhl2	1.92031e-12	0.510132	0.969	0.96	4.88353e-08
Macrod1	2.10835e-12	-0.255054	0.19	0.452	5.36174e-08
Zfp2	2.15456e-12	-0.260624	0.136	0.35	5.47926e-08
Gm43376	2.1746e-12	-0.351997	0.218	0.475	5.53023e-08
Pias2	2.31039e-12	-0.297603	0.359	0.712	5.87555e-08
Mef2d	2.48662e-12	-0.255793	0.172	0.418	6.32372e-08
Apex2	2.50687e-12	-0.276754	0.176	0.418	6.37523e-08
Ppme1	2.53149e-12	-0.256444	0.193	0.458	6.43784e-08
Luc7l2	2.66121e-12	0.428021	0.999	0.994	6.76772e-08
Zc3h12c	2.72668e-12	-0.352601	0.192	0.429	6.93422e-08
Ubb	2.81454e-12	0.49831	0.991	0.96	7.15764e-08
Bccip	3.07613e-12	-0.254898	0.098	0.282	7.8229e-08
Tbc1d4	3.10095e-12	-0.278718	0.093	0.271	7.88601e-08
Astn1	3.17845e-12	-0.393108	0.586	0.763	8.0831e-08
Gdap1	3.36751e-12	-0.265052	0.152	0.379	8.56392e-08
Nos1ap	3.41066e-12	-0.447926	0.431	0.712	8.67365e-08
Zfp799	3.62061e-12	-0.263488	0.215	0.492	9.20758e-08
Rffl	3.65975e-12	0.675751	0.611	0.48	9.3071e-08
Arpc5l	3.7077e-12	-0.256259	0.164	0.401	9.42905e-08
Txlng	4.07619e-12	-0.256149	0.177	0.424	1.03662e-07
Csrnp3	4.40536e-12	-0.381843	0.779	0.893	1.12033e-07
Atp6v1d	4.50249e-12	-0.271081	0.262	0.559	1.14503e-07
Mapk10	4.58576e-12	-0.299835	0.835	0.898	1.1662e-07
Gm20754	4.72749e-12	-0.306405	0.295	0.599	1.20225e-07
Cyp27a1	5.06033e-12	0.640635	0.429	0.181	1.28689e-07
Klhl7	5.09268e-12	-0.292405	0.363	0.706	1.29512e-07
Slc6a1	5.15867e-12	-0.300723	0.388	0.746	1.3119e-07
Zfp280c	5.25671e-12	0.584764	0.711	0.695	1.33683e-07
H2afz	5.45822e-12	-0.33577	0.333	0.672	1.38808e-07
Rnft1	5.69307e-12	-0.262418	0.132	0.339	1.4478e-07
Exoc4	5.77921e-12	0.480802	0.977	0.944	1.46971e-07
Rasal2	6.34501e-12	0.55601	0.918	0.853	1.6136e-07
Tnrc6b	7.03388e-12	0.451088	0.945	0.802	1.78879e-07
Tbc1d16	7.08837e-12	-0.250294	0.174	0.412	1.80264e-07
Rnf227	7.16984e-12	-0.280459	0.104	0.288	1.82336e-07
Ubp1	7.34994e-12	-0.281642	0.194	0.446	1.86916e-07
Phf14	7.83296e-12	0.543671	0.862	0.819	1.992e-07
Fabp5	7.84213e-12	-0.402225	0.23	0.48	1.99433e-07
Clstn1	8.17753e-12	-0.28675	0.306	0.644	2.07963e-07
Ncoa2	8.54022e-12	0.510329	0.854	0.78	2.17186e-07
2510009E07Rik	8.64761e-12	-0.266705	0.195	0.441	2.19917e-07
Slc39a10	9.09491e-12	-0.251632	0.159	0.39	2.31293e-07
Wipf1	9.38119e-12	0.670028	0.564	0.384	2.38573e-07
Hspa12a	9.56515e-12	-0.252745	0.117	0.311	2.43251e-07
Dtna	9.66775e-12	0.509575	0.925	0.831	2.45861e-07
Nsf	1.08212e-11	-0.356989	0.657	0.842	2.75193e-07
Hnrnpdl	1.1009e-11	0.457226	0.914	0.881	2.79969e-07
Ptpre	1.10544e-11	-0.277112	0.198	0.446	2.81125e-07
Ftx	1.10595e-11	-0.357486	0.628	0.842	2.81254e-07
Polr2a	1.14628e-11	0.649975	0.422	0.192	2.9151e-07
Nfx1	1.35156e-11	-0.305276	0.497	0.853	3.43716e-07
Grina	1.3698e-11	-0.350305	0.399	0.729	3.48353e-07
Lrrc8c	1.39071e-11	-0.266242	0.16	0.384	3.53671e-07
Dlat	1.44002e-11	-0.278956	0.162	0.384	3.66211e-07
Cux1	1.50319e-11	-0.29185	0.386	0.723	3.82275e-07
Usp54	1.5392e-11	0.615578	0.658	0.593	3.91433e-07
Cpsf3	1.6063e-11	-0.26827	0.134	0.339	4.08499e-07
Suclg1	1.63386e-11	-0.2818	0.194	0.441	4.15508e-07
Pld3	1.65751e-11	-0.295446	0.183	0.418	4.21522e-07
4930420G21Rik	1.73332e-11	0.806084	0.604	0.463	4.40799e-07
Olfm3	1.80001e-11	-0.279446	0.107	0.288	4.5776e-07
Snx14	1.89591e-11	-0.255054	0.195	0.441	4.8215e-07
Orc4	1.95039e-11	-0.25732	0.299	0.621	4.96003e-07
Ctso	1.96432e-11	0.579727	0.406	0.169	4.99545e-07
Vdac1	2.26996e-11	-0.298026	0.327	0.655	5.77274e-07
Nefl	2.29656e-11	-0.263055	0.095	0.266	5.84037e-07
Kpna1	2.366e-11	-0.272597	0.23	0.503	6.01698e-07
Synj1	2.38316e-11	-0.253488	0.298	0.616	6.06061e-07
Gab2	2.39873e-11	0.771797	0.511	0.333	6.1002e-07
Rassf8	2.48785e-11	-0.338003	0.383	0.712	6.32685e-07
Zcchc18	2.64262e-11	-0.327738	0.394	0.695	6.72044e-07
Supt5	3.19444e-11	-0.279449	0.179	0.412	8.12378e-07
Miga1	3.26936e-11	-0.286354	0.152	0.362	8.3143e-07
Eml5	3.37716e-11	-0.362999	0.804	0.898	8.58846e-07
Creb5	3.73629e-11	0.617363	0.624	0.452	9.50176e-07
Mrpl41	4.2444e-11	-0.328385	0.224	0.48	1.07939e-06
Lrrc1	4.25854e-11	-0.268158	0.202	0.446	1.08299e-06
Agpat4	4.39221e-11	0.543793	0.636	0.469	1.11698e-06
Tmem175	4.40096e-11	-0.251989	0.267	0.565	1.11921e-06
Smarca4	4.61975e-11	-0.265627	0.226	0.492	1.17485e-06
Tulp4	4.84233e-11	0.498829	0.832	0.825	1.23145e-06
Mtf2	5.37495e-11	-0.261389	0.338	0.65	1.3669e-06
Ybx1	5.62611e-11	-0.273953	0.309	0.627	1.43078e-06
Grik2	5.86419e-11	-0.327545	0.999	1	1.49132e-06
Tnpo1	5.90008e-11	-0.269867	0.344	0.672	1.50045e-06
March8	6.02879e-11	0.619794	0.495	0.305	1.53318e-06
Atp2a2	6.21095e-11	-0.417897	0.585	0.842	1.57951e-06
Fchsd2	6.68044e-11	-0.27625	0.35	0.644	1.6989e-06
Faah	6.93337e-11	0.543913	0.308	0.085	1.76322e-06
Plekha5	7.11355e-11	-0.273111	0.948	0.989	1.80905e-06
D7Ertd443e	7.60373e-11	0.563188	0.777	0.763	1.9337e-06
Slc1a3	7.79713e-11	0.616327	0.379	0.153	1.98289e-06
Mllt3	7.82308e-11	-0.376706	0.653	0.819	1.98949e-06
Ppp1cb	8.32381e-11	-0.288978	0.3	0.593	2.11683e-06
Serp2	8.49772e-11	-0.27084	0.166	0.384	2.16106e-06
Fam120b	8.59544e-11	-0.271893	0.292	0.588	2.18591e-06
Ndufa5	9.38485e-11	-0.311444	0.241	0.503	2.38666e-06
Rnf103	9.73265e-11	-0.274462	0.22	0.469	2.47511e-06
Jam3	9.83103e-11	0.594867	0.626	0.508	2.50013e-06
Ppfibp2	1.0908e-10	0.593957	0.544	0.384	2.77401e-06
Gabarapl1	1.15225e-10	-0.259273	0.205	0.446	2.93029e-06
Pnisr	1.18773e-10	0.41331	0.99	0.983	3.02051e-06
Maco1	1.27633e-10	-0.253526	0.314	0.627	3.24584e-06
Camsap1	1.28174e-10	-0.260872	0.159	0.367	3.25959e-06
Prkar1a	1.30275e-10	-0.300397	0.279	0.565	3.31302e-06
Ywhah	1.3462e-10	-0.2604	0.208	0.458	3.42353e-06
4930445B16Rik	1.37903e-10	-0.307975	0.17	0.384	3.50701e-06
Arntl	1.41901e-10	-0.260887	0.115	0.294	3.60868e-06
Stmn4	1.43073e-10	0.52713	0.802	0.825	3.63849e-06
Tsnax	1.45723e-10	-0.271915	0.312	0.621	3.70588e-06
Gm20275	1.55981e-10	-0.348184	0.52	0.791	3.96675e-06
Elavl3	1.58547e-10	0.541029	0.785	0.785	4.03201e-06
Folh1	1.77569e-10	0.639019	0.52	0.345	4.51575e-06
Sorcs3	1.80021e-10	-0.342491	0.242	0.492	4.57812e-06
4930511M06Rik	1.95332e-10	0.649631	0.519	0.345	4.96749e-06
Nf1	1.99326e-10	0.486193	0.821	0.757	5.06906e-06
Atp6v1b2	2.08753e-10	-0.258719	0.318	0.633	5.30878e-06
Fgf1	2.13736e-10	0.516983	0.301	0.079	5.43552e-06
Nfe2l3	2.24606e-10	0.615244	0.501	0.333	5.71196e-06
Caprin1	2.32229e-10	-0.263406	0.327	0.644	5.90581e-06
Peak1	2.36436e-10	-0.269491	0.235	0.492	6.01281e-06
Qrich1	2.4743e-10	-0.253889	0.309	0.61	6.29238e-06
Trpm7	2.54328e-10	0.441603	0.814	0.797	6.46781e-06
Il1rap	2.56517e-10	0.631167	0.65	0.599	6.52348e-06
Cdh19	2.68891e-10	0.724415	0.564	0.429	6.83816e-06
2610035D17Rik	2.76761e-10	0.648977	0.567	0.446	7.03832e-06
Nrbp2	2.79305e-10	0.511334	0.603	0.463	7.10302e-06
Efr3b	2.99785e-10	-0.268797	0.3	0.593	7.62382e-06
Srsf5	3.86776e-10	0.408685	0.848	0.802	9.83609e-06
Auh	3.92785e-10	-0.270424	0.195	0.418	9.98892e-06
Mgll	3.94661e-10	-0.264232	0.167	0.373	1.00366e-05
Rcbtb1	4.32633e-10	0.554839	0.628	0.508	1.10023e-05
Ext2	4.93517e-10	-0.264232	0.179	0.39	1.25506e-05
Picalm	5.47521e-10	0.52836	0.716	0.729	1.3924e-05
Scg2	5.5832e-10	-0.326986	0.129	0.311	1.41986e-05
A230006K03Rik	5.90322e-10	-0.336203	0.693	0.797	1.50125e-05
Ahcyl2	6.40544e-10	-0.289603	0.583	0.825	1.62897e-05
Slc35f1	7.14842e-10	-0.488085	0.714	0.763	1.81791e-05
Rpl26	7.47466e-10	-0.358323	0.34	0.621	1.90088e-05
Sema6a	7.53432e-10	0.594078	0.629	0.492	1.91605e-05
Diaph2	7.76793e-10	-0.322513	0.929	0.966	1.97546e-05
Zfp706	8.58624e-10	-0.273967	0.25	0.503	2.18357e-05
Hspa4	8.75521e-10	-0.299423	0.376	0.695	2.22654e-05
Sgip1	9.2458e-10	-0.276078	0.945	0.966	2.3513e-05
Myo5a	9.34765e-10	-0.297429	0.637	0.847	2.3772e-05
Map1b	9.55027e-10	-0.417367	0.814	0.893	2.42873e-05
Cobl	9.64735e-10	-0.310741	0.449	0.746	2.45342e-05
Pak1	1.13297e-09	0.522415	0.784	0.842	2.88126e-05
Tmem163	1.14427e-09	0.659862	0.384	0.186	2.90999e-05
Gm48512	1.30716e-09	-0.253077	0.238	0.48	3.32424e-05
Adssl1	1.3723e-09	0.562702	0.376	0.175	3.48989e-05
Gpm6b	1.41745e-09	0.36704	0.998	1	3.60472e-05
Abca2	1.43625e-09	0.573419	0.635	0.576	3.65253e-05
Dock1	1.51582e-09	0.566325	0.642	0.576	3.85489e-05
Rab31	1.54013e-09	0.562514	0.651	0.576	3.91671e-05
Jakmip2	1.60773e-09	-0.263386	0.51	0.774	4.08863e-05
Abca1	1.72234e-09	0.551863	0.376	0.175	4.38009e-05
Cadm1	1.80989e-09	0.429243	0.908	0.734	4.60274e-05
Srsf2	2.19519e-09	0.541822	0.72	0.734	5.58259e-05
Zfpm2	2.20201e-09	0.638029	0.284	0.085	5.59992e-05
Fign	2.2695e-09	0.600504	0.547	0.384	5.77156e-05
Cobll1	2.76052e-09	0.613325	0.589	0.48	7.02027e-05
Sec61a2	2.77634e-09	0.575368	0.603	0.542	7.06051e-05
Daam1	2.79653e-09	0.496461	0.711	0.689	7.11186e-05
Ldhb	2.82249e-09	-0.287003	0.454	0.774	7.17789e-05
Zcchc7	2.91295e-09	0.359657	0.99	0.972	7.40791e-05
1700111E14Rik	2.94413e-09	-0.316823	0.374	0.655	7.48722e-05
Mrps33	3.02323e-09	-0.271666	0.229	0.463	7.68836e-05
Nfix	3.16459e-09	0.561833	0.498	0.345	8.04787e-05
Pacs2	3.57362e-09	0.542819	0.542	0.407	9.08807e-05
Usp50	3.74744e-09	-0.260624	0.177	0.379	9.53011e-05
Pip4k2a	3.93297e-09	0.50543	0.726	0.729	0.000100019
Nrg3	3.93824e-09	-0.898054	0.929	0.774	0.000100153
Tspan7	3.96153e-09	-0.334816	0.844	0.932	0.000100746
Opa1	4.08721e-09	-0.269854	0.3	0.565	0.000103942
Matn4	4.17949e-09	0.536102	0.432	0.243	0.000106289
Heg1	4.30049e-09	0.571247	0.464	0.271	0.000109366
Cd81	4.32042e-09	0.546473	0.819	0.836	0.000109873
Ankrd44	4.41967e-09	0.525863	0.345	0.147	0.000112397
Psmc6	4.53623e-09	-0.284237	0.326	0.621	0.000115361
Lncpint	4.71541e-09	-0.275282	0.929	0.938	0.000119918
Tomm20	5.10505e-09	-0.25368	0.32	0.599	0.000129827
Dpyd	5.91177e-09	0.729198	0.387	0.192	0.000150342
Gjc3	6.47752e-09	0.464255	0.772	0.74	0.00016473
Gapdh	6.74791e-09	0.39905	0.975	0.96	0.000171606
Prkg1	6.77396e-09	-0.770182	0.331	0.497	0.000172269
Ywhaq	7.17971e-09	0.482803	0.778	0.763	0.000182587
Gng11	7.36204e-09	0.606803	0.597	0.463	0.000187224
Mtss1	7.42793e-09	0.549551	0.376	0.186	0.0001889
Arap2	7.67947e-09	0.600415	0.605	0.548	0.000195297
Thrb	7.89169e-09	-0.368219	0.63	0.757	0.000200693
Chd7	9.20423e-09	0.559644	0.532	0.379	0.000234073
Dixdc1	9.58105e-09	0.544108	0.681	0.667	0.000243656
Basp1	9.62422e-09	-0.265573	0.199	0.412	0.000244754
Klf7	1.03915e-08	0.564984	0.593	0.559	0.000264267
Opalin	1.0746e-08	0.571089	0.765	0.712	0.000273283
Ppp2r2c	1.09587e-08	-0.254226	0.263	0.514	0.000278691
Gkap1	1.11002e-08	0.635931	0.502	0.362	0.000282288
Kcnq3	1.19669e-08	0.42595	0.999	0.972	0.000304331
Taf15	1.22238e-08	0.489625	0.681	0.644	0.000310864
Ralgapa2	1.28352e-08	-0.292635	0.459	0.729	0.000326412
Ttll5	1.29632e-08	0.554433	0.562	0.463	0.000329668
Arhgef28	1.30982e-08	0.529929	0.568	0.435	0.000333101
Gm48742	1.35639e-08	0.675215	0.446	0.288	0.000344943
Mobp	1.39435e-08	0.421337	0.826	0.814	0.000354596
Zfp608	1.46012e-08	0.604527	0.541	0.463	0.000371324
Abcc5	1.46488e-08	0.394396	0.84	0.814	0.000372534
Trim35	1.73392e-08	0.341664	0.95	0.932	0.000440954
Sirt2	1.75684e-08	0.54841	0.559	0.429	0.000446782
B3galt1	1.8131e-08	0.43993	0.997	0.989	0.000461089
Rps6ka5	1.86517e-08	0.520364	0.752	0.768	0.000474332
Hspa8	1.90347e-08	0.383671	0.909	0.819	0.000484072
Myo1e	1.99795e-08	0.505722	0.485	0.311	0.0005081
Dnmt3a	2.1253e-08	-0.274594	0.736	0.955	0.000540484
Lama2	2.14126e-08	0.748093	0.475	0.322	0.000544543
Sec11c	2.33246e-08	0.530685	0.7	0.667	0.000593169
Shisa4	2.36165e-08	0.496562	0.629	0.514	0.000600591
Cpe	2.61783e-08	-0.313525	0.53	0.751	0.00066574
Arhgap5	2.7321e-08	0.501572	0.668	0.599	0.000694801
Phactr4	2.99425e-08	0.518731	0.395	0.215	0.000761468
Ddx24	3.17448e-08	-0.253831	0.525	0.825	0.000807302
Tmem151a	3.40515e-08	0.539168	0.576	0.452	0.000865963
Ttc19	3.56687e-08	-0.276535	0.582	0.836	0.00090709
Prpf4b	3.59834e-08	0.378802	0.976	0.876	0.000915093
Ext1	3.92687e-08	0.438299	0.777	0.667	0.000998643
Gnas	4.12332e-08	0.507504	0.602	0.531	0.0010486
Sik2	4.56255e-08	-0.275133	0.433	0.734	0.0011603
Celf1	4.56558e-08	-0.308726	0.811	0.91	0.00116107
Kndc1	5.03178e-08	0.514971	0.513	0.373	0.00127963
Cdh18	5.33537e-08	-0.625121	0.803	0.757	0.00135684
Rbm25	5.34112e-08	0.422247	0.868	0.831	0.0013583
Usp25	5.465e-08	0.524085	0.464	0.316	0.0013898
4930581F22Rik	5.6742e-08	0.582812	0.446	0.294	0.00144301
Mfn1	6.10537e-08	0.492289	0.407	0.243	0.00155266
Nav2	6.67802e-08	-0.26092	0.899	0.91	0.00169829
9330111N05Rik	7.10064e-08	-0.62974	0.168	0.322	0.00180576
Stmn1	7.70381e-08	0.486449	0.759	0.768	0.00195916
Pld1	8.55205e-08	0.493685	0.376	0.209	0.00217487
Lpar1	8.78033e-08	0.519377	0.494	0.345	0.00223293
Ago3	9.2703e-08	0.452455	0.801	0.797	0.00235753
Tcf25	9.37641e-08	0.412832	0.839	0.797	0.00238452
Chchd10	9.41511e-08	-0.334697	0.498	0.763	0.00239436
Trip12	9.95359e-08	0.414867	0.783	0.757	0.0025313
Lamp1	9.96803e-08	0.554986	0.672	0.672	0.00253497
Tasor	1.05832e-07	0.508427	0.632	0.627	0.00269141
Klf12	1.24733e-07	-0.281127	0.402	0.588	0.00317209
Pde4d	1.24826e-07	0.396052	0.669	0.469	0.00317445
Tle4	1.28787e-07	-0.372929	0.731	0.842	0.00327518
Prdx1	1.3401e-07	0.52277	0.678	0.655	0.00340802
Cald1	1.34404e-07	0.497374	0.413	0.249	0.00341802
Pcdh11x	1.38274e-07	0.523176	0.83	0.712	0.00351644
Lrch3	1.41397e-07	0.544672	0.635	0.672	0.00359587
Ncor1	1.45699e-07	0.387822	0.928	0.847	0.00370527
Rbm5	1.48737e-07	0.376925	0.85	0.831	0.00378254
Kcnq1ot1	1.4927e-07	0.496846	0.95	0.842	0.00379607
Atp1b1	1.5092e-07	-0.252917	0.856	0.893	0.00383804
E130308A19Rik	1.53578e-07	0.522827	0.549	0.452	0.00390565
Rock1	1.59743e-07	0.409332	0.808	0.774	0.00406243
Kmt2c	1.63497e-07	0.399925	0.793	0.746	0.0041579
Nipbl	1.83375e-07	0.398459	0.848	0.797	0.0046634
Ppp1cc	2.08523e-07	-0.284925	0.284	0.503	0.00530296
Rnf130	2.16945e-07	0.516887	0.616	0.588	0.00551712
Kcnh7	2.21552e-07	-0.454372	0.583	0.689	0.00563428
Klf9	2.46446e-07	-0.279817	0.247	0.441	0.00626736
Tmem108	2.4754e-07	0.565346	0.322	0.164	0.0062952
Macf1	2.51054e-07	0.367245	0.994	0.972	0.00638454
Tmem132b	2.54724e-07	-0.277486	0.736	0.904	0.00647788
Prkcq	2.58934e-07	0.511146	0.446	0.299	0.00658495
Nktr	2.75366e-07	0.381045	0.851	0.847	0.00700283
Apba1	2.76599e-07	0.480576	0.665	0.633	0.00703419
Sema4d	2.83446e-07	0.462959	0.469	0.316	0.00720832
Ermn	2.88586e-07	0.47436	0.702	0.684	0.00733902
Vps8	3.33415e-07	0.478077	0.523	0.424	0.00847907
Rnf43	3.36599e-07	0.512533	0.352	0.192	0.00856006
Ankub1	3.46159e-07	0.478692	0.391	0.232	0.00880317
Daam2	3.63348e-07	0.480275	0.585	0.508	0.00924031
Smyd3	3.74141e-07	-0.290858	0.869	0.893	0.00951479
Prkd3	3.77198e-07	0.451538	0.352	0.186	0.00959253
Rtkn2	4.00983e-07	0.449869	0.331	0.164	0.0101974
Prrg1	4.19903e-07	0.568118	0.42	0.266	0.0106786
Tspan9	4.31555e-07	0.532984	0.327	0.164	0.0109749
Rnpc3	4.35336e-07	0.407744	0.792	0.74	0.011071
Gm11149	4.36806e-07	0.443881	0.599	0.514	0.0111084
Synj2	4.39439e-07	0.543487	0.504	0.407	0.0111754
Rhobtb3	4.44177e-07	0.458467	0.412	0.254	0.0112959
Clic4	4.50428e-07	0.488884	0.558	0.446	0.0114548
Tenm1	4.54276e-07	-0.48133	0.583	0.672	0.0115527
Stard9	4.97901e-07	0.464402	0.335	0.175	0.0126621
Dscam	5.39378e-07	0.538379	0.298	0.13	0.0137169
Tspan5	6.03584e-07	0.440994	0.851	0.814	0.0153497
Rdx	6.19429e-07	0.522241	0.513	0.412	0.0157527
Atp6v0c	6.21781e-07	0.379316	0.959	0.876	0.0158125
Oxr1	7.05701e-07	0.493377	0.67	0.627	0.0179467
Ank	7.53263e-07	0.48866	0.662	0.661	0.0191562
Mtus1	7.78408e-07	0.494643	0.385	0.232	0.0197957
Arih1	8.15234e-07	0.388469	0.789	0.706	0.0207322
Eif2s3y	8.23682e-07	0.536524	0.625	0.633	0.0209471
Cntn3	8.52009e-07	0.404778	0.882	0.718	0.0216675
Nap1l5	8.5814e-07	0.51887	0.601	0.605	0.0218234
Fam155a	8.85333e-07	-0.566399	0.837	0.712	0.0225149
Ccdc50	9.80259e-07	0.507355	0.518	0.424	0.024929
Huwe1	1.062e-06	0.329915	0.852	0.797	0.0270077
Ctnna3	1.07241e-06	0.435611	0.996	0.994	0.0272725
Gria4	1.0818e-06	0.397059	0.984	0.91	0.0275112
Carns1	1.18678e-06	0.446039	0.359	0.203	0.0301809
Ywhaz	1.4389e-06	-0.265092	0.528	0.785	0.0365926
Gnai1	1.50787e-06	0.498488	0.651	0.678	0.0383465
Scd2	1.60068e-06	0.386299	0.935	0.938	0.0407069
Abca8a	1.60443e-06	0.57779	0.336	0.186	0.0408022
Abhd14b	1.67728e-06	0.449305	0.338	0.192	0.0426549
Rb1	1.73559e-06	0.491462	0.552	0.52	0.0441377
Megf10	1.75104e-06	0.439934	0.457	0.311	0.0445306
Tac1	1.76225e-06	-0.794757	0.425	0.571	0.0448157
Shroom3	1.78162e-06	0.599132	0.341	0.192	0.0453084
Tmbim1	1.88655e-06	0.426864	0.551	0.452	0.0479768
Hnrnpu	1.959e-06	0.331455	0.913	0.859	0.0498194
Zfp771	2.03946e-06	0.533152	0.42	0.299	0.0518655
Tjp2	2.21074e-06	0.474219	0.418	0.299	0.0562214
Kmt2e	2.22976e-06	0.354247	0.859	0.847	0.0567051
9330117O12Rik	2.30653e-06	0.495658	0.477	0.362	0.0586574
Rhou	2.38628e-06	0.460965	0.569	0.497	0.0606855
Sbf1	2.38934e-06	0.415294	0.48	0.356	0.0607634
Mbnl1	2.48263e-06	0.412725	0.827	0.808	0.0631358
Chd6	2.59468e-06	0.32288	0.875	0.836	0.0659852
Ephb1	2.6724e-06	0.411859	0.905	0.927	0.0679618
Mbnl2	2.81672e-06	0.259665	0.997	1	0.071632
Anks1b	2.90114e-06	-0.259562	1	1	0.0737789
Nav1	3.46988e-06	0.526685	0.519	0.475	0.0882425
Setd5	3.58662e-06	0.375054	0.77	0.763	0.0912114
Psat1	4.18238e-06	0.466324	0.446	0.328	0.106362
Evi2a	4.23509e-06	0.479617	0.525	0.424	0.107703
Sbf2	4.30905e-06	0.340303	0.873	0.774	0.109583
Pcsk1n	4.31887e-06	0.274934	0.923	0.791	0.109833
Glrb	4.33512e-06	0.477081	0.609	0.633	0.110246
Bicd1	4.41026e-06	0.399841	0.869	0.836	0.112157
Strn3	4.77752e-06	0.347299	0.942	0.927	0.121497
Ncald	4.83437e-06	0.484971	0.427	0.322	0.122943
Bin1	5.01831e-06	0.381456	0.788	0.87	0.127621
Fto	5.0427e-06	0.337917	0.815	0.814	0.128241
Ankib1	5.10245e-06	0.471823	0.661	0.729	0.12976
Grik1	5.16939e-06	0.645084	0.32	0.181	0.131463
Csmd2	5.50545e-06	0.532154	0.577	0.582	0.140009
Zfp638	5.5454e-06	0.382814	0.933	0.932	0.141025
Cdk12	5.55949e-06	0.328501	0.773	0.763	0.141383
Wdfy3	5.82103e-06	0.335457	0.713	0.661	0.148035
Jakmip3	5.86007e-06	0.432932	0.64	0.689	0.149027
Rpl14	5.97758e-06	-0.256577	0.335	0.548	0.152016
Csrp1	6.35479e-06	0.422836	0.696	0.678	0.161609
Osbpl1a	6.38237e-06	0.39309	0.666	0.678	0.16231
Astn2	6.53679e-06	-0.273507	0.258	0.435	0.166237
Dennd1a	6.54521e-06	0.325699	0.964	0.921	0.166451
Cpd	6.81384e-06	0.46493	0.473	0.379	0.173283
Tnni1	6.88854e-06	0.484418	0.448	0.339	0.175182
Dusp16	7.24328e-06	0.452823	0.419	0.294	0.184204
Lhfpl3	7.88441e-06	-0.354968	0.728	0.763	0.200508
Cuedc1	8.00529e-06	0.462711	0.395	0.282	0.203583
Tanc1	8.02476e-06	0.421421	0.394	0.26	0.204078
5031439G07Rik	8.40628e-06	0.457364	0.597	0.599	0.21378
Atp2c1	8.48757e-06	0.318376	0.895	0.91	0.215847
Ugp2	8.93344e-06	0.438105	0.388	0.26	0.227186
Hhip	9.3043e-06	0.42874	0.386	0.249	0.236618
Efnb3	9.746e-06	0.409111	0.621	0.571	0.247851
Trps1	9.8269e-06	0.38023	0.861	0.797	0.249908
Parp8	1.0329e-05	0.435286	0.354	0.22	0.262678
Tnrc6a	1.08495e-05	0.370606	0.792	0.808	0.275914
Rsrc1	1.12818e-05	0.395593	0.725	0.768	0.286908
Cog5	1.15886e-05	0.400488	0.68	0.684	0.294711
Sltm	1.17516e-05	0.320773	0.803	0.836	0.298856
St6gal1	1.21442e-05	0.485451	0.49	0.407	0.308839
Josd2	1.30528e-05	0.343362	0.615	0.548	0.331946
Cpeb3	1.37786e-05	0.33639	0.879	0.831	0.350405
Sned1	1.38208e-05	0.398154	0.31	0.175	0.351477
Crppa	1.53101e-05	0.48849	0.441	0.356	0.389351
Snx15	1.57581e-05	0.415037	0.459	0.35	0.400744
Mpzl1	1.59376e-05	0.409057	0.395	0.271	0.405309
Cox16	1.68239e-05	0.388773	0.791	0.751	0.42785
Rbm26	1.74097e-05	0.323632	0.954	0.938	0.442745
Abhd17b	1.77344e-05	0.324899	0.73	0.768	0.451004
Oxct1	1.79322e-05	-0.265794	0.739	0.847	0.456035
1500004A13Rik	1.91897e-05	0.354119	0.711	0.689	0.488013
Olfml1	2.27296e-05	0.465393	0.524	0.48	0.578036
Slc25a4	2.27534e-05	0.34094	0.817	0.819	0.578642
Ttyh2	2.50648e-05	0.424029	0.602	0.582	0.637422
Pcbp4	2.59104e-05	0.390898	0.449	0.345	0.658928
Scaper	2.64199e-05	0.35476	0.798	0.757	0.671885
Lgi3	2.73956e-05	0.447371	0.523	0.469	0.696696
Olig1	2.80316e-05	0.425622	0.541	0.458	0.712871
Gsn	2.8847e-05	0.481638	0.459	0.367	0.733607
Slc20a2	2.89922e-05	0.380372	0.521	0.463	0.7373
Slco3a1	2.91948e-05	0.482578	0.514	0.475	0.742453
Atp11a	3.36352e-05	0.433519	0.489	0.407	0.855377
Prox1	3.38476e-05	0.43814	0.424	0.322	0.860779
Prrc2c	3.51166e-05	0.285557	0.878	0.853	0.893051
Ankrd12	3.63299e-05	0.310329	0.922	0.876	0.923905
Pcm1	3.85485e-05	0.305894	0.878	0.859	0.980327
Srgap3	3.8594e-05	0.337962	0.819	0.774	0.981483
Dmxl1	3.94755e-05	0.343313	0.801	0.831	1
Mif4gd	4.04055e-05	0.354944	0.293	0.164	1
Aopep	4.34068e-05	0.29815	0.855	0.814	1
Ptpra	4.44255e-05	0.362608	0.652	0.689	1
Retreg1	4.69414e-05	0.409227	0.552	0.48	1
Dpy19l1	4.71978e-05	0.424674	0.503	0.435	1
Ccnl2	4.97547e-05	0.374462	0.664	0.701	1
Ugt8a	5.09357e-05	0.354017	0.716	0.706	1
Pstpip2	5.44391e-05	0.447397	0.514	0.458	1
Thsd7a	5.82217e-05	-0.279325	0.932	0.887	1
Golim4	6.07537e-05	0.407195	0.261	0.141	1
Crebzf	6.58085e-05	0.394863	0.583	0.616	1
Ppp1r12a	6.7282e-05	0.312218	0.881	0.881	1
Gnao1	6.82408e-05	0.26094	0.975	0.977	1
Sox10	7.26551e-05	0.35234	0.651	0.605	1
U2surp	7.36711e-05	0.298798	0.833	0.802	1
Cyp2j12	7.42148e-05	0.435984	0.455	0.373	1
Kif13a	7.47891e-05	0.436149	0.666	0.746	1
Lamp2	7.85329e-05	0.425006	0.483	0.429	1
Cnp	8.25492e-05	0.404486	0.798	0.825	1
2810468N07Rik	8.26596e-05	0.392074	0.491	0.412	1
Micall1	8.41978e-05	0.390217	0.419	0.311	1
Srrm1	8.9777e-05	0.291479	0.797	0.831	1
Bcas3	9.54198e-05	0.32704	0.871	0.853	1
Pik3r1	9.55355e-05	0.421215	0.578	0.582	1
Maml2	9.66045e-05	0.472827	0.263	0.147	1
Mboat1	9.86783e-05	0.396878	0.38	0.271	1
Zdhhc14	0.000101923	0.324743	0.959	0.938	1
Afdn	0.000110454	0.285073	0.781	0.768	1
Atp9a	0.000111754	0.374278	0.648	0.695	1
Gab1	0.000114084	0.350132	0.627	0.633	1
Enah	0.000115163	0.423476	0.577	0.548	1
Gna12	0.000118015	0.403502	0.513	0.469	1
Eps15	0.00012984	0.402776	0.516	0.475	1
Gpatch8	0.000130728	0.266128	0.991	0.977	1
Rbm6	0.000140285	0.266831	0.854	0.825	1
Hsp90ab1	0.000147368	0.262455	0.961	0.932	1
Eml6	0.000148007	0.296965	0.873	0.831	1
Krit1	0.000151681	0.323106	0.77	0.819	1
Reep5	0.00015885	0.318286	0.689	0.757	1
Plxnb3	0.000168612	0.303803	0.361	0.249	1
Clk1	0.000170959	0.257647	0.873	0.842	1
Birc6	0.000183636	0.258467	0.836	0.847	1
Iqsec1	0.000191672	0.302905	0.878	0.881	1
Card19	0.000210099	0.323089	0.276	0.164	1
Smad7	0.000210607	0.363311	0.565	0.554	1
[truncated: 223 more rows]

## Sheet: thiamine_cluster4R61thiaminevsN
Column1	p_val	avg_log2FC	pct.1	pct.2	p_val_adj
Malat1	4.04765e-54	-0.577994	1	1	1.02936e-49
Pcp4	1.51073e-46	-1.20154	0.7	0.924	3.84194e-42
Cmss1	2.34261e-44	-0.886928	0.983	1	5.95748e-40
AC149090.1	4.30184e-42	-0.829253	0.842	0.987	1.094e-37
Meg3	3.12547e-38	0.528032	1	1	7.94838e-34
Penk	5.22473e-36	-1.20101	0.378	0.751	1.3287e-31
Ckb	1.40971e-32	-0.884519	0.872	0.959	3.58504e-28
Luc7l2	9.22191e-32	0.537923	0.995	0.99	2.34522e-27
Ogt	1.80593e-30	0.589232	0.967	0.85	4.59266e-26
AY036118	5.06971e-26	-0.618732	0.993	1	1.28928e-21
Rian	6.6341e-26	0.514304	0.991	0.98	1.68712e-21
Rbm39	2.74913e-25	0.441496	0.998	0.992	6.99131e-21
Gm42418	3.851e-25	-0.631566	1	1	9.79348e-21
Frmd4a	5.64562e-23	0.522423	0.995	0.962	1.43574e-18
Lrrk2	6.73591e-23	-0.713401	0.449	0.725	1.71301e-18
Magi2	7.27251e-22	0.407088	1	1	1.84947e-17
Cnksr2	1.62258e-21	-0.633139	0.837	0.931	4.12638e-17
Rgs9	4.41192e-21	-1.08365	0.603	0.758	1.122e-16
Inf2	9.81091e-21	-0.691091	0.35	0.641	2.49501e-16
Slc35f1	6.74723e-20	-0.672475	0.946	0.957	1.71589e-15
Rbm26	1.62042e-19	0.435286	0.979	0.888	4.1209e-15
Cntnap2	3.31989e-19	0.512921	1	0.977	8.44281e-15
Snhg11	1.43735e-18	0.372926	1	1	3.65531e-14
Ank2	1.84561e-18	0.316784	1	1	4.69356e-14
Cdr1os	2.68712e-18	0.465176	0.991	0.952	6.83361e-14
Gm49906	4.11302e-18	-0.746644	0.44	0.684	1.04598e-13
Ier5l	1.13974e-16	-0.332738	0.125	0.377	2.89847e-12
Scn4b	1.21684e-16	-0.34374	0.066	0.285	3.09456e-12
Camk1d	1.2751e-16	-0.510441	0.941	0.967	3.24271e-12
Ptms	1.55949e-16	-0.446403	0.53	0.758	3.96595e-12
Mgat4c	1.92079e-16	0.945752	0.816	0.628	4.88476e-12
Ube3a	3.45132e-16	0.347841	0.998	0.997	8.77704e-12
Camkv	4.37419e-16	-0.50116	0.43	0.682	1.1124e-11
Sfmbt2	8.8743e-16	0.390421	0.317	0.089	2.25682e-11
Egr1	9.20202e-16	-0.558313	0.151	0.384	2.34017e-11
Ppp1r1b	9.70203e-16	-0.511643	0.27	0.514	2.46732e-11
Calm1	2.9225e-15	-0.517529	0.901	0.962	7.4322e-11
AI480526	3.57499e-15	0.43256	0.522	0.27	9.09155e-11
Plcb1	7.46774e-15	-0.440282	0.953	0.99	1.89912e-10
Nrxn1	1.30946e-14	0.265114	1	1	3.33009e-10
Foxp2	1.93274e-14	-0.538139	0.785	0.906	4.91515e-10
Dbp	2.33566e-14	-0.342889	0.099	0.31	5.93983e-10
Phactr1	3.81613e-14	-0.855942	0.981	0.99	9.7048e-10
Sgip1	4.2829e-14	0.335974	0.991	0.964	1.08919e-09
Taf15	4.3591e-14	0.400762	0.799	0.593	1.10856e-09
Snhg14	4.73599e-14	0.333398	0.998	0.992	1.20441e-09
Drd1	1.05339e-13	-0.549666	0.307	0.529	2.67889e-09
Ctnnd2	1.44554e-13	0.336125	0.998	0.977	3.67615e-09
Gm47423	1.63001e-13	-0.508997	0.168	0.387	4.14527e-09
Gnb5	1.91299e-13	-0.399024	0.499	0.73	4.86491e-09
Epha5	2.1194e-13	0.569158	0.868	0.723	5.38983e-09
Calm2	2.25067e-13	-0.450962	0.96	0.982	5.72368e-09
Grin2a	2.42676e-13	-0.46445	0.905	0.972	6.17149e-09
Guf1	3.58287e-13	0.398932	0.57	0.341	9.11159e-09
Grid2	3.67776e-13	0.503771	0.962	0.86	9.35291e-09
Camk2n1	3.76559e-13	-0.41849	0.251	0.491	9.57626e-09
Lpp	4.41796e-13	0.365281	0.305	0.097	1.12353e-08
Pde1b	7.3528e-13	-0.502057	0.267	0.476	1.86989e-08
Zfhx3	8.92266e-13	1.032	0.444	0.232	2.26912e-08
Per1	2.28597e-12	-0.308843	0.085	0.27	5.81346e-08
March1	2.66322e-12	0.928101	0.527	0.331	6.77285e-08
Cntnap3	2.88757e-12	-0.393186	0.118	0.326	7.34337e-08
Gprin3	3.18834e-12	-0.642181	0.541	0.715	8.10828e-08
Smc2	4.83219e-12	0.356164	0.348	0.145	1.22887e-07
Camk2a	4.93412e-12	-0.407363	0.809	0.908	1.2548e-07
Nr4a1	6.04253e-12	-0.481942	0.142	0.336	1.53668e-07
Gas5	7.2071e-12	0.352807	0.785	0.578	1.83284e-07
Neto1	7.4668e-12	-0.486219	0.752	0.86	1.89888e-07
Rab3b	7.88422e-12	-0.428545	0.272	0.494	2.00504e-07
Chst9	8.97598e-12	-0.810574	0.17	0.369	2.28268e-07
Rtn3	1.00057e-11	0.324226	0.972	0.957	2.54455e-07
Junb	1.13703e-11	-0.685966	0.173	0.379	2.89159e-07
Sntg1	1.40044e-11	0.310548	1	0.985	3.56145e-07
Slc2a13	1.58315e-11	-0.544812	0.863	0.919	4.0261e-07
Tmod1	1.69039e-11	-0.40177	0.265	0.481	4.29884e-07
Dynll1	1.78574e-11	-0.43299	0.501	0.707	4.54132e-07
Rbm5	1.93607e-11	0.363712	0.837	0.723	4.92362e-07
Gnas	1.96495e-11	0.435765	0.818	0.626	4.99707e-07
Fam189a1	2.83246e-11	-0.415693	0.605	0.781	7.20324e-07
Gabrd	2.86959e-11	-0.294456	0.142	0.341	7.29765e-07
Fam155a	3.23905e-11	0.255815	0.998	0.985	8.23723e-07
Zfyve28	4.06733e-11	-0.356839	0.362	0.578	1.03436e-06
Gpr88	4.29687e-11	-0.503734	0.447	0.631	1.09274e-06
Pcsk1n	4.38717e-11	0.485934	0.96	0.888	1.1157e-06
Scaper	4.72252e-11	0.401616	0.83	0.74	1.20098e-06
Gpr158	5.08508e-11	-0.436737	0.965	0.98	1.29319e-06
Kank3	5.37994e-11	-0.28157	0.083	0.252	1.36817e-06
Nsun7	7.72869e-11	0.311724	0.437	0.226	1.96548e-06
Srsf11	8.90684e-11	0.325464	0.957	0.913	2.2651e-06
Dcc	9.21218e-11	0.464258	0.967	0.888	2.34275e-06
Inka2	1.01555e-10	-0.273287	0.085	0.252	2.58264e-06
Lhfpl3	1.23556e-10	0.460146	0.896	0.817	3.14215e-06
Celf2	1.34859e-10	-0.427055	0.998	0.997	3.42961e-06
Stk3	1.51555e-10	0.325492	0.433	0.221	3.85419e-06
Ctxn1	1.88565e-10	-0.344344	0.232	0.433	4.7954e-06
Gm45323	2.21041e-10	0.310879	0.364	0.165	5.62129e-06
Miat	2.85017e-10	0.305386	0.56	0.341	7.24826e-06
Hpca	3.99881e-10	-0.34022	0.27	0.476	1.01694e-05
Gabrb1	4.22211e-10	0.392494	0.924	0.86	1.07373e-05
Cpne5	4.39733e-10	-0.413061	0.489	0.677	1.11828e-05
Gmds	4.62406e-10	0.38343	0.728	0.552	1.17594e-05
Kcnh3	5.1313e-10	-0.294516	0.17	0.359	1.30494e-05
Ryr1	5.55977e-10	-0.471069	0.319	0.494	1.41391e-05
Nkain2	5.77403e-10	0.296538	0.998	1	1.46839e-05
Dgkz	6.66073e-10	-0.356602	0.324	0.511	1.69389e-05
Macf1	6.68375e-10	0.283702	0.983	0.975	1.69974e-05
Pcp4l1	8.28103e-10	-0.388859	0.262	0.458	2.10595e-05
Cplx2	9.25725e-10	-0.34433	0.506	0.677	2.35421e-05
Luc7l3	1.04415e-09	0.352661	0.931	0.858	2.65538e-05
4930402H24Rik	1.06023e-09	0.304883	0.936	0.847	2.69627e-05
Otof	1.14081e-09	-0.501184	0.397	0.56	2.9012e-05
Mycbp2	1.14453e-09	0.26837	1	0.995	2.91065e-05
Cep164	1.31965e-09	0.310025	0.643	0.443	3.35599e-05
Strn3	1.48138e-09	0.336251	0.915	0.86	3.7673e-05
Hlf	1.48996e-09	-0.290553	0.229	0.427	3.7891e-05
Gkap1	1.76535e-09	0.373371	0.615	0.427	4.48946e-05
Cdh18	1.77788e-09	0.523246	0.91	0.784	4.52132e-05
Fam172a	1.81797e-09	0.322715	0.863	0.768	4.62328e-05
Dpysl3	2.02183e-09	0.304336	0.322	0.142	5.14172e-05
A230057D06Rik	2.16502e-09	0.348466	0.92	0.812	5.50586e-05
Zswim6	2.2439e-09	-0.522468	0.759	0.837	5.70646e-05
Osbpl8	2.34202e-09	-0.482512	0.79	0.863	5.956e-05
Edil3	2.50322e-09	0.284304	0.733	0.506	6.36594e-05
Snrnp70	2.75299e-09	0.259631	0.986	0.969	7.00112e-05
Gria4	2.79671e-09	0.291378	0.976	0.901	7.11231e-05
Akap6	2.92592e-09	0.254252	0.988	0.98	7.44092e-05
Tra2a	2.97657e-09	0.303028	0.934	0.842	7.56972e-05
Baiap2	3.02385e-09	-0.38423	0.563	0.723	7.68996e-05
Gm30382	3.09597e-09	0.367258	0.461	0.265	7.87336e-05
Trpm3	3.14823e-09	-0.497016	0.877	0.916	8.00626e-05
Crppa	3.18706e-09	0.32231	0.407	0.219	8.105e-05
Ccdc85b	3.20884e-09	-0.298773	0.239	0.42	8.16039e-05
Upp2	3.52112e-09	0.350314	0.868	0.799	8.95455e-05
Klhdc10	3.92657e-09	0.347436	0.794	0.705	9.98567e-05
Ranbp17	4.22691e-09	0.356799	0.589	0.415	0.000107495
Etl4	4.24345e-09	-0.460319	0.858	0.949	0.000107915
Wsb1	4.6964e-09	0.337478	0.65	0.478	0.000119434
Strip2	4.78502e-09	-0.404958	0.281	0.466	0.000121688
Slc22a17	4.87215e-09	0.31774	0.948	0.86	0.000123904
2010300C02Rik	5.0798e-09	-0.362941	0.544	0.69	0.000129184
Nrgn	5.139e-09	-0.54566	0.757	0.835	0.00013069
Gas7	5.14792e-09	-0.326028	0.404	0.595	0.000130917
Garnl3	5.53568e-09	0.34392	0.532	0.326	0.000140778
Orc2	5.97758e-09	0.300717	0.544	0.354	0.000152016
Socs2	5.98423e-09	-0.289181	0.22	0.405	0.000152185
Sema5b	6.52147e-09	-0.459547	0.43	0.626	0.000165848
Gm28494	7.4052e-09	-0.367361	0.156	0.328	0.000188322
Fbxl16	7.4244e-09	-0.311619	0.324	0.511	0.00018881
Fgd4	7.76969e-09	0.324016	0.494	0.305	0.000197591
Plxdc1	9.11852e-09	-0.262319	0.173	0.346	0.000231893
Apc	9.22248e-09	0.254219	0.953	0.901	0.000234537
Gm15810	9.29236e-09	-0.528508	0.449	0.578	0.000236314
Syndig1l	9.4287e-09	-0.296621	0.158	0.323	0.000239781
Rab40b	1.04193e-08	-0.348846	0.291	0.476	0.000264974
C130073E24Rik	1.19457e-08	0.302677	0.579	0.369	0.000303791
Ndrg4	1.25935e-08	-0.312722	0.837	0.924	0.000320265
Dync1i1	1.31079e-08	0.322305	0.901	0.812	0.000333347
Fam184b	1.33583e-08	-0.275759	0.22	0.399	0.000339716
Ralgapa1	1.45955e-08	0.280614	0.929	0.883	0.000371179
Sgcz	1.49514e-08	0.441402	0.931	0.802	0.000380229
Rasgrp2	1.51659e-08	-0.265642	0.113	0.265	0.000385684
Slc8a2	1.69798e-08	-0.279858	0.248	0.427	0.000431812
Pip5k1b	1.80095e-08	0.348967	0.376	0.206	0.000458
Itpka	1.85959e-08	-0.279895	0.154	0.316	0.000472913
Homer1	2.00943e-08	-0.583865	0.567	0.705	0.000511017
A230006K03Rik	2.15877e-08	0.326698	0.922	0.868	0.000548997
Cadm1	2.21608e-08	0.526891	0.754	0.672	0.000563571
Pde4b	2.21834e-08	-0.408882	0.934	0.964	0.000564145
Kmt2c	2.45777e-08	0.273141	0.783	0.677	0.000625036
Kcnip3	2.53833e-08	-0.299757	0.208	0.382	0.000645523
Ppp1r1a	2.83261e-08	-0.283837	0.206	0.379	0.000720362
Clasp2	2.85352e-08	0.296681	0.903	0.791	0.000725678
Atp2b2	2.87884e-08	-0.282695	0.924	0.972	0.000732118
Atp2b4	2.92287e-08	-0.413355	0.574	0.707	0.000743316
Gnal	3.05662e-08	-0.402483	0.809	0.868	0.000777329
Fgf12	3.12195e-08	0.310966	0.95	0.885	0.000793942
Mxi1	3.33137e-08	-0.2504	0.26	0.45	0.000847202
Npas2	3.64241e-08	-0.408577	0.397	0.547	0.000926302
Rasgef1a	3.67731e-08	-0.318115	0.579	0.707	0.000935175
Gm45321	3.71798e-08	0.372612	0.371	0.198	0.000945519
Frmpd3	3.72703e-08	0.31128	0.267	0.12	0.000947821
Rbm28	3.81787e-08	0.340223	0.669	0.527	0.000970921
Gpi1	3.82287e-08	0.338995	0.7	0.588	0.000972193
9630028H03Rik	3.8393e-08	-0.42199	0.686	0.791	0.000976372
Gbf1	4.13942e-08	0.282332	0.747	0.623	0.0010527
Pde4a	4.15928e-08	-0.343039	0.435	0.588	0.00105775
Zranb2	4.21818e-08	0.254183	0.979	0.957	0.00107273
Alk	4.5733e-08	-0.558025	0.492	0.616	0.00116304
Slc4a4	4.58103e-08	-0.403252	0.643	0.774	0.001165
D030068K23Rik	4.81123e-08	0.434747	0.409	0.234	0.00122354
Slc24a5	4.84685e-08	0.326397	0.707	0.578	0.0012326
Sorcs2	4.95643e-08	-0.486247	0.6	0.718	0.00126047
Usp34	4.9793e-08	0.267653	0.95	0.891	0.00126629
Zdhhc20	5.00372e-08	0.286811	0.738	0.593	0.0012725
Pabpn1	5.07748e-08	0.30628	0.837	0.74	0.00129125
Chn2	5.13571e-08	-0.398425	0.636	0.763	0.00130606
Kcnq1ot1	5.39112e-08	0.298962	0.941	0.88	0.00137102
Prpf4b	5.77493e-08	0.283283	0.95	0.921	0.00146862
Zmat1	5.84237e-08	0.277787	0.383	0.216	0.00148577
Smpd3	6.13329e-08	-0.359226	0.489	0.646	0.00155976
Tia1	6.14031e-08	0.297058	0.877	0.804	0.00156154
Pbx3	6.14166e-08	-0.382696	0.825	0.908	0.00156189
Pla2g3	6.41681e-08	-0.303332	0.232	0.399	0.00163186
Erbb4	6.52091e-08	-0.575158	0.849	0.888	0.00165833
Exoc6b	6.53765e-08	0.298441	0.849	0.766	0.00166259
Cntnap5a	6.77931e-08	0.488014	0.667	0.517	0.00172405
Ttc28	6.89178e-08	0.2971	0.421	0.242	0.00175265
Cacna2d3	6.96046e-08	-0.367958	0.861	0.926	0.00177011
Kcnq3	7.15608e-08	-0.314641	0.891	0.934	0.00181986
Lypd1	7.32245e-08	-0.465146	0.475	0.611	0.00186217
Rock1	7.40617e-08	0.319044	0.818	0.728	0.00188346
Slc9a9	7.71032e-08	0.417685	0.291	0.14	0.00196081
Ttyh1	7.74505e-08	-0.339666	0.442	0.601	0.00196964
Limch1	7.78432e-08	0.33684	0.584	0.412	0.00197963
Ccdc85a	8.11555e-08	0.366322	0.522	0.344	0.00206386
Neto2	8.1507e-08	-0.403297	0.44	0.583	0.0020728
Col6a1	8.43547e-08	-0.340308	0.125	0.267	0.00214522
Spata7	8.69186e-08	0.292421	0.626	0.461	0.00221043
Cdk12	8.70381e-08	0.290867	0.771	0.664	0.00221347
Ptk2b	9.25488e-08	-0.300576	0.418	0.58	0.00235361
A330015K06Rik	9.44015e-08	-0.412888	0.617	0.723	0.00240072
Trip12	9.50711e-08	0.297154	0.835	0.728	0.00241775
Ppp2r2b	9.80992e-08	0.322114	0.948	0.891	0.00249476
Mir670hg	1.01074e-07	-0.501135	0.378	0.524	0.00257041
Ptprd	1.05778e-07	0.629601	0.924	0.898	0.00269004
Ddx5	1.08083e-07	0.265117	0.979	0.957	0.00274866
Wscd2	1.1315e-07	-0.355424	0.444	0.59	0.00287752
Usp2	1.13751e-07	-0.275134	0.201	0.359	0.00289281
Asic2	1.15074e-07	0.377683	0.957	0.944	0.00292644
Dpyd	1.22721e-07	0.528875	0.537	0.361	0.00312093
Uri1	1.23414e-07	0.327245	0.591	0.468	0.00313855
Coq10b	1.24724e-07	-0.324112	0.187	0.338	0.00317185
Mpc1	1.25174e-07	-0.288625	0.494	0.656	0.0031833
Chd3	1.26111e-07	0.290515	0.783	0.677	0.00320714
Kif17	1.26328e-07	-0.27134	0.184	0.338	0.00321266
C79798	1.26392e-07	-0.298254	0.395	0.573	0.00321429
Dock9	1.28611e-07	0.287906	0.582	0.415	0.0032707
Adgrb1	1.33868e-07	-0.29324	0.499	0.649	0.00340441
Khdrbs2	1.39742e-07	0.36344	0.716	0.545	0.00355378
Dlx6os1	1.44265e-07	-0.345316	0.556	0.695	0.00366881
Slc25a36	1.52493e-07	0.306881	0.671	0.532	0.00387805
Deptor	1.59705e-07	-0.38814	0.255	0.41	0.00406147
Fkbp1a	1.70344e-07	-0.317868	0.589	0.73	0.00433201
Chchd2	1.70392e-07	-0.314538	0.499	0.662	0.00433323
Mast3	1.70442e-07	-0.256058	0.255	0.427	0.00433451
Lrfn5	1.73345e-07	0.417548	0.856	0.763	0.00440834
Ngef	1.81241e-07	-0.296304	0.466	0.626	0.00460915
Gm13974	1.86444e-07	-0.440716	0.248	0.397	0.00474147
Ppp3ca	1.87412e-07	-0.267176	0.998	0.992	0.00476608
Mdga1	1.97604e-07	-0.283213	0.189	0.349	0.00502526
Cx3cl1	1.98468e-07	-0.313668	0.544	0.679	0.00504723
Ivns1abp	2.00953e-07	-0.393974	0.44	0.585	0.00511044
Hjurp	2.41542e-07	0.282401	0.504	0.344	0.00614266
Pak3	2.60032e-07	0.361453	0.806	0.723	0.00661288
Gabra4	2.61939e-07	-0.28089	0.452	0.628	0.00666138
Pdzrn4	2.74e-07	0.43135	0.504	0.313	0.0069681
Necab1	2.76046e-07	-0.625953	0.676	0.758	0.00702012
Pvt1	2.86191e-07	0.413879	0.388	0.242	0.00727811
Kcnip2	3.13437e-07	-0.265209	0.243	0.402	0.00797102
Bsn	3.44289e-07	-0.281215	0.428	0.583	0.00875562
Tac1	3.74671e-07	-0.803513	0.56	0.662	0.00952826
Npffr2	3.77133e-07	-0.309957	0.135	0.277	0.00959087
Gsg1l	3.78548e-07	-0.258686	0.18	0.326	0.00962685
Pnn	3.88467e-07	0.28963	0.849	0.794	0.0098791
Arpp21	4.24294e-07	-0.256278	0.92	0.949	0.0107902
Cpne6	4.28704e-07	-0.296675	0.322	0.491	0.0109024
Ccnl2	4.34173e-07	0.323916	0.721	0.623	0.0110415
Cdc42bpa	4.74385e-07	0.271923	0.92	0.817	0.0120641
Ewsr1	4.75567e-07	0.271094	0.827	0.743	0.0120941
Csgalnact1	4.85027e-07	-0.403153	0.404	0.565	0.0123347
Baz2b	4.9348e-07	0.309296	0.799	0.692	0.0125497
Gpr83	5.00059e-07	-0.254086	0.158	0.3	0.012717
C230057M02Rik	5.06504e-07	-0.253526	0.158	0.303	0.0128809
Nav3	5.12919e-07	0.268819	0.993	0.959	0.013044
Il1rapl1	5.19681e-07	0.256002	0.993	0.992	0.013216
Rab6b	5.22066e-07	-0.306802	0.527	0.667	0.0132767
Plcl2	5.57546e-07	-0.301661	0.716	0.835	0.014179
Bbx	5.72623e-07	0.314525	0.577	0.443	0.0145624
Mir99ahg	5.79269e-07	0.371919	0.809	0.718	0.0147314
Gm16105	5.94504e-07	-0.279559	0.251	0.399	0.0151188
Ubr3	6.06936e-07	0.272047	0.842	0.761	0.015435
Mirg	6.09696e-07	0.264204	0.676	0.517	0.0155052
Hivep2	6.12857e-07	-0.266215	0.957	0.975	0.0155856
Gabrg1	6.30633e-07	0.276341	0.272	0.13	0.0160376
Camk2b	6.46032e-07	-0.277975	0.669	0.776	0.0164292
Unc13c	6.48601e-07	-0.385273	0.721	0.794	0.0164946
Tfrc	6.52959e-07	0.276205	0.494	0.341	0.0166054
Arhgef3	6.56464e-07	-0.306826	0.314	0.476	0.0166945
Scg5	6.99312e-07	0.272685	0.948	0.926	0.0177842
Myef2	7.44351e-07	0.268649	0.809	0.677	0.0189296
Tesc	7.8244e-07	-0.258965	0.191	0.341	0.0198982
Gpatch8	7.86863e-07	0.259131	0.974	0.931	0.0200107
Cog5	7.9744e-07	0.275699	0.714	0.595	0.0202797
Frmd5	8.26765e-07	0.332805	0.723	0.555	0.0210255
Car11	8.74623e-07	-0.287941	0.511	0.639	0.0222425
Brinp3	9.17732e-07	0.456748	0.615	0.453	0.0233389
Tmem130	9.39427e-07	0.332943	0.662	0.529	0.0238906
A330102I10Rik	9.43091e-07	0.288387	0.357	0.198	0.0239838
Khdrbs3	9.83307e-07	-0.308902	0.641	0.791	0.0250065
Arel1	1.00116e-06	-0.277629	0.333	0.489	0.0254606
Ramp1	1.00783e-06	-0.270994	0.284	0.44	0.0256301
Tmsb4x	1.03631e-06	-0.306124	0.586	0.728	0.0263543
Zfhx4	1.12177e-06	0.356131	0.395	0.244	0.0285277
Mt1	1.15944e-06	-0.362468	0.376	0.524	0.0294858
Lzts3	1.19018e-06	-0.262319	0.187	0.326	0.0302675
Dscam	1.22897e-06	0.34456	0.719	0.57	0.0312539
4930555F03Rik	1.25433e-06	0.322343	0.442	0.277	0.0318989
Eml6	1.30345e-06	0.274386	0.887	0.809	0.033148
Acyp2	1.33027e-06	0.25691	0.6	0.438	0.03383
Gm38505	1.34185e-06	-0.392311	0.598	0.725	0.0341246
U2surp	1.3622e-06	0.281226	0.872	0.774	0.0346422
Rasgrp1	1.40179e-06	-0.327731	0.475	0.611	0.0356489
Pdzd2	1.43562e-06	-0.293106	0.182	0.326	0.0365093
Pde10a	1.68294e-06	-0.930169	0.929	0.921	0.0427989
Hras	1.69878e-06	-0.267504	0.298	0.44	0.0432018
Adcy5	1.73554e-06	-0.481209	0.551	0.651	0.0441365
Pmepa1	1.86441e-06	-0.357275	0.291	0.433	0.0474137
Cdk8	1.88776e-06	-0.30102	0.832	0.873	0.0480076
Sec14l1	1.89035e-06	-0.257624	0.255	0.407	0.0480735
Snrnp48	1.98821e-06	0.276613	0.596	0.463	0.0505623
Ptpn5	2.12274e-06	-0.292541	0.622	0.72	0.0539834
Fam120c	2.14786e-06	0.268457	0.603	0.458	0.0546222
Mast4	2.15536e-06	0.40097	0.553	0.412	0.054813
Per3	2.28524e-06	-0.267385	0.291	0.433	0.0581159
Sox1ot	2.39769e-06	-0.274329	0.407	0.567	0.0609758
Adamts3	2.43701e-06	-0.348026	0.645	0.753	0.0619756
Ano5	2.81222e-06	0.256792	0.272	0.145	0.0715174
Actn2	2.88666e-06	-0.366317	0.284	0.415	0.0734106
Agk	2.91463e-06	0.254854	0.648	0.501	0.074122
Atp2b1	2.93493e-06	-0.359509	0.962	0.982	0.0746381
Tshz1	3.02518e-06	-0.300146	0.626	0.768	0.0769333
Kcnb2	3.04309e-06	0.273352	0.652	0.499	0.0773889
Atraid	3.08211e-06	0.260253	0.513	0.366	0.0783811
Nrg3	3.1763e-06	0.297164	0.983	0.941	0.0807764
Slc39a10	3.46998e-06	-0.268447	0.39	0.534	0.088245
Ate1	3.55586e-06	0.256442	0.506	0.366	0.0904291
Acsl3	3.75685e-06	-0.280962	0.388	0.542	0.0955405
Sv2c	4.0615e-06	-0.325949	0.414	0.575	0.103288
Gad1	4.44259e-06	-0.298458	0.764	0.837	0.11298
Atad2b	4.46218e-06	0.272525	0.716	0.593	0.113478
Bicd1	4.48652e-06	0.250056	0.887	0.802	0.114097
P4ha1	4.80545e-06	-0.277551	0.376	0.511	0.122207
Nktr	4.83749e-06	0.256442	0.823	0.756	0.123022
Pde2a	5.26016e-06	-0.293755	0.504	0.644	0.133771
Tef	5.28546e-06	-0.292609	0.402	0.532	0.134414
Elmo1	5.43274e-06	-0.300264	0.792	0.878	0.13816
Ncoa2	5.50967e-06	0.26044	0.809	0.718	0.140117
5330417C22Rik	5.89635e-06	-0.318843	0.548	0.649	0.14995
B830012L14Rik	6.03669e-06	0.309897	0.641	0.532	0.153519
Son	6.07211e-06	0.277585	0.991	0.954	0.15442
Arpp19	6.26961e-06	-0.30995	0.397	0.524	0.159442
Bcr	6.33901e-06	-0.269848	0.447	0.578	0.161207
Inpp4b	6.39763e-06	-0.504519	0.688	0.807	0.162698
Nxpe4	6.71838e-06	0.254869	0.374	0.237	0.170855
AI593442	7.02969e-06	-0.269896	0.291	0.422	0.178772
Cacna1b	7.03682e-06	0.258254	0.761	0.674	0.178953
Prkn	7.12469e-06	0.259072	0.917	0.855	0.181188
Gng7	7.49588e-06	-0.310142	0.409	0.545	0.190628
Atp1a1	8.07723e-06	-0.291211	0.499	0.626	0.205412
Xylt1	8.3349e-06	-0.331032	0.603	0.718	0.211965
Dlc1	8.40984e-06	0.251896	0.518	0.374	0.213871
Stmn2	8.7911e-06	0.262203	0.558	0.415	0.223567
Nek1	9.20534e-06	0.271466	0.518	0.384	0.234101
Ndufa5	9.21934e-06	-0.278428	0.31	0.45	0.234457
Abl2	9.40453e-06	-0.302939	0.626	0.74	0.239167
Htr2c	9.70691e-06	0.504757	0.371	0.242	0.246856
Smad3	9.81886e-06	-0.260946	0.184	0.305	0.249703
Gm20754	1.04128e-05	0.428749	0.267	0.148	0.264807
Hivep3	1.04584e-05	0.2592	0.74	0.654	0.265967
Efr3b	1.16931e-05	-0.27388	0.473	0.603	0.297367
Camk2d	1.20873e-05	0.39295	0.78	0.664	0.307393
4933424G05Rik	1.33054e-05	-0.317412	0.314	0.438	0.33837
Csmd1	1.35798e-05	0.262376	0.993	0.985	0.345348
Rgs7bp	1.49216e-05	-0.313684	0.851	0.901	0.379471
Pde8b	1.58487e-05	-0.276565	0.742	0.84	0.403049
Wipf3	1.74801e-05	-0.265825	0.456	0.575	0.444535
Pde9a	2.00008e-05	-0.285143	0.225	0.346	0.50864
Mtcl1	2.03472e-05	-0.286571	0.378	0.509	0.51745
Pde1a	2.05254e-05	0.325311	0.745	0.611	0.52198
Elob	2.0683e-05	-0.257034	0.504	0.636	0.525989
Uty	2.21861e-05	0.278841	0.634	0.534	0.564215
Slc38a2	2.23096e-05	-0.271781	0.504	0.636	0.567356
Map2k1	2.30037e-05	-0.294853	0.489	0.611	0.585006
Slc24a3	2.34202e-05	0.263585	0.65	0.522	0.595599
Thsd7a	2.36256e-05	0.313797	0.459	0.321	0.600824
Fmnl2	2.43556e-05	0.272707	0.541	0.41	0.619386
Ppp1r2	2.58977e-05	-0.304887	0.411	0.524	0.658604
Acer3	2.65834e-05	0.25155	0.43	0.293	0.676043
Pitpnc1	2.73325e-05	-0.267065	0.574	0.7	0.695092
Cntn6	2.85856e-05	0.278442	0.407	0.254	0.726961
Pcsk2	3.03087e-05	-0.323049	0.811	0.901	0.77078
Sik2	3.05056e-05	-0.27796	0.416	0.537	0.775788
Olfm3	3.12773e-05	-0.351087	0.78	0.835	0.795413
Elavl2	3.58862e-05	0.290389	0.338	0.209	0.912621
Nedd4l	3.64235e-05	-0.278492	0.846	0.87	0.926286
Ptma	3.74875e-05	-0.285871	0.402	0.534	0.953344
Kctd1	4.54753e-05	-0.27765	0.591	0.687	1
Robo2	4.98779e-05	0.261603	0.868	0.812	1
Aff2	5.04954e-05	0.261695	0.619	0.478	1
Grm1	5.0997e-05	0.322881	0.546	0.417	1
Ywhaz	5.3845e-05	-0.267191	0.65	0.733	1
Tpt1	5.38589e-05	-0.266488	0.423	0.555	1
Gm10848	5.5244e-05	-0.3244	0.229	0.336	1
Mrpl41	5.73857e-05	-0.253715	0.444	0.555	1
Ndufa4	5.88365e-05	-0.329433	0.697	0.791	1
Rpl24	6.01512e-05	-0.288744	0.544	0.656	1
Mat2a	6.13751e-05	-0.257965	0.624	0.753	1
Actb	6.32344e-05	-0.286932	0.823	0.891	1
Lyst	6.90098e-05	-0.259389	0.579	0.677	1
Fstl1	6.93092e-05	-0.25865	0.241	0.354	1
Gm28905	7.13352e-05	-0.603892	0.622	0.682	1
Hs6st2	7.19545e-05	-0.348298	0.749	0.817	1
Greb1l	7.29827e-05	0.264139	0.324	0.206	1
Ptbp2	7.32717e-05	0.254444	0.707	0.626	1
Kcnh5	7.60863e-05	-0.431723	0.414	0.522	1
Pcbp3	8.77447e-05	-0.257525	0.44	0.565	1
Bcl11b	9.38772e-05	-0.259255	0.667	0.748	1
Lrtm1	9.61648e-05	-0.254676	0.322	0.438	1
Tshz2	9.92628e-05	0.529889	0.255	0.15	1
Gtdc1	0.00010624	0.25434	0.57	0.466	1
Slc8a1	0.000111374	0.280245	0.825	0.738	1
Sox2ot	0.000114987	-0.330953	0.79	0.863	1
Rcan2	0.000125146	-0.279353	0.695	0.771	1
Cdh12	0.000148054	0.396923	0.366	0.26	1
Tle4	0.000149952	0.259301	0.596	0.478	1
Tmem117	0.000156406	0.258823	0.65	0.545	1
Cdh13	0.000169973	-0.322958	0.747	0.837	1
Prkd1	0.000171464	-0.546101	0.411	0.473	1
Lin28b	0.000179752	0.260654	0.541	0.427	1
Gpm6b	0.000180491	-0.29117	0.806	0.835	1
Tmem158	0.000196473	-0.255207	0.527	0.613	1
Rps6ka5	0.000209415	-0.265986	0.461	0.578	1
Pcdh15	0.000234808	-0.340247	0.877	0.911	1
A830018L16Rik	0.000239972	0.2772	0.726	0.667	1
Ntrk2	0.00025441	-0.298541	0.875	0.896	1
Negr1	0.000265996	0.261882	0.993	0.995	1
Pde7b	0.000348107	-0.363634	0.764	0.794	1
Rmst	0.000357842	0.281834	0.286	0.173	1
Rtl4	0.000364258	0.286551	0.253	0.15	1
Lmo4	0.000375186	-0.338114	0.433	0.524	1
Kcnd2	0.000401584	-0.315809	0.986	0.967	1
Gm16083	0.000452306	-0.271714	0.227	0.331	1
B3galt1	0.000481957	-0.25666	0.962	0.987	1
Gm15398	0.000495009	-0.34174	0.61	0.705	1
Kcnab1	0.000588447	-0.284818	0.844	0.883	1
Gm32647	0.000603239	0.66671	0.31	0.211	1
Rbm20	0.000605953	-0.312895	0.267	0.361	1
Stmn1	0.000635195	-0.268516	0.499	0.595	1
Gm10754	0.000688697	-0.720806	0.414	0.466	1
Itpr1	0.00070651	-0.257024	0.622	0.702	1
Fam171b	0.000733647	-0.265451	0.589	0.672	1
Rpl11	0.000749522	-0.250333	0.475	0.562	1
Sphkap	0.000775429	-0.389004	0.537	0.608	1
Efna5	0.000784933	0.375405	0.34	0.244	1
Kcnt2	0.000795608	0.251814	0.664	0.552	1
Slc8a3	0.000846526	0.253261	0.34	0.244	1
Ptprm	0.00086312	-0.273132	0.707	0.794	1
Chsy3	0.000988324	0.312114	0.702	0.631	1
Gm15680	0.00104677	-0.270925	0.246	0.344	1
Olfm1	0.00110558	-0.254992	0.421	0.524	1
Slc44a5	0.00135387	-0.309882	0.541	0.644	1
Cacna2d1	0.00146643	0.269912	0.794	0.718	1
Sema3a	0.00156056	0.257238	0.371	0.275	1
Sema3e	0.00173699	-0.366236	0.44	0.527	1
Cacnb2	0.00189818	-0.347724	0.962	0.952	1
Immp2l	0.0021549	0.27321	0.745	0.677	1
Slit3	0.00236859	-0.346607	0.662	0.682	1
Kctd16	0.00263371	-0.286893	0.896	0.896	1
Lcorl	0.00308643	0.263999	0.47	0.402	1
Rxrg	0.00320315	-0.276739	0.392	0.471	1
Zfp407	0.00417377	0.268607	0.757	0.664	1
Tcf4	0.00561526	0.267359	0.537	0.455	1
Mef2c	0.00693291	-0.262656	0.615	0.669	1
Lingo2	0.00861425	0.280854	0.83	0.766	1
Resp18	0.0147373	0.29366	0.385	0.326	1
Syt6	0.0168439	-0.251044	0.355	0.415	1
Vwc2l	0.0189697	-0.400542	0.582	0.57	1
Cntnap5b	0.0200601	0.512573	0.461	0.402	1
Kcnk2	0.0211552	-0.328907	0.577	0.603	1
Nfib	0.0380544	-0.251406	0.359	0.427	1
Cnr1	0.0636176	-0.25662	0.272	0.308	1
Htr1f	0.0804479	-0.292408	0.489	0.522	1
Tafa2	0.0877077	0.269113	0.577	0.567	1
Tmcc3	0.110536	0.252709	0.352	0.316	1
Gpr149	0.119653	-0.263536	0.352	0.377	1
Dlgap1	0.349382	-0.282517	0.946	0.913	1

## Sheet: thiamine_cluster5R61thiaminevsN
Column1	p_val	avg_log2FC	pct.1	pct.2	p_val_adj
Cmss1	4.36966e-65	-0.854248	1	1	1.11125e-60
Gm42418	1.98184e-39	-0.514094	1	1	5.04001e-35
AY036118	1.49619e-32	-0.522064	0.998	1	3.80497e-28
Penk	1.76195e-31	-0.75086	0.174	0.487	4.48081e-27
Pcp4	2.29837e-25	-0.666217	0.736	0.864	5.84497e-21
Id3	1.44335e-22	-0.777505	0.402	0.651	3.67058e-18
Mical2	3.41704e-21	-0.529725	0.327	0.6	8.68988e-17
Glul	9.72784e-20	-0.584644	0.661	0.803	2.47389e-15
Id4	6.91828e-19	-0.607004	0.56	0.731	1.75939e-14
Ogt	2.03567e-17	0.405378	0.968	0.926	5.17691e-13
AC149090.1	1.78655e-16	-0.46676	0.854	0.924	4.54338e-12
Mfge8	2.37494e-16	-0.546393	0.449	0.659	6.03972e-12
Htra1	2.84632e-16	-0.624916	0.673	0.758	7.23847e-12
Fjx1	7.63494e-16	-0.641465	0.5	0.669	1.94164e-11
Camk1d	1.03934e-15	-0.398909	0.929	0.971	2.64314e-11
Fgf14	1.11039e-15	0.427795	0.995	0.979	2.82384e-11
Prdx6	2.82391e-15	-0.484902	0.807	0.865	7.18147e-11
Trpm3	1.22632e-14	0.607953	0.932	0.854	3.11866e-10
Adgrl3	1.68488e-14	0.374573	0.997	0.992	4.28481e-10
Paqr8	2.42724e-14	-0.454091	0.437	0.641	6.1727e-10
Apoe	2.71252e-14	-0.435149	0.977	0.977	6.8982e-10
Mt1	4.01632e-14	-0.514281	0.872	0.906	1.02139e-09
Slc25a21	4.88232e-14	0.524331	0.329	0.144	1.24162e-09
Aldoc	5.59381e-14	-0.601242	0.714	0.791	1.42256e-09
Mat2a	5.77866e-14	-0.425229	0.54	0.731	1.46957e-09
Kcnn2	5.89519e-14	-0.474442	0.467	0.665	1.49921e-09
Dbp	9.22647e-14	-0.417551	0.327	0.52	2.34638e-09
Son	8.14929e-13	0.310082	1	0.998	2.07245e-08
Ttyh1	1.31266e-12	-0.411344	0.821	0.879	3.33822e-08
Rgs7	1.42353e-11	0.529221	0.942	0.903	3.62017e-07
Lrrc4c	1.69725e-11	0.364635	0.998	0.992	4.31628e-07
Lxn	1.73187e-11	-0.361336	0.201	0.374	4.40433e-07
Mt3	2.38312e-11	-0.410501	0.837	0.867	6.06052e-07
Clu	3.08297e-11	-0.416924	0.89	0.914	7.84029e-07
Cdk8	3.92265e-11	-0.288494	0.87	0.93	9.97569e-07
Phgdh	5.67018e-11	-0.366261	0.374	0.546	1.44198e-06
Meg3	6.72738e-11	0.431309	0.982	0.924	1.71084e-06
Agbl4	7.67957e-11	0.371182	0.679	0.52	1.95299e-06
Pmepa1	1.37892e-10	-0.287619	0.115	0.261	3.50674e-06
Grin2b	1.46314e-10	0.340529	0.945	0.858	3.72092e-06
Scd2	1.50678e-10	-0.360712	0.827	0.895	3.83189e-06
Nudt3	4.43417e-10	-0.344126	0.362	0.522	1.12765e-05
Lrmda	5.70621e-10	0.507013	0.294	0.146	1.45115e-05
Gstm5	7.42583e-10	-0.46863	0.654	0.77	1.88846e-05
Ckb	1.5007e-09	-0.320067	0.998	0.994	3.81644e-05
Nlgn1	2.15498e-09	0.261364	0.998	0.994	5.48032e-05
Ctnnd2	3.26224e-09	0.2751	1	1	8.2962e-05
Slc1a2	3.52746e-09	-0.325205	0.914	0.945	8.97068e-05
Pantr1	4.07808e-09	-0.344852	0.542	0.673	0.00010371
Npas3	4.19665e-09	0.359711	0.952	0.928	0.000106725
Fam171b	4.29701e-09	-0.290559	0.641	0.782	0.000109277
Klf12	4.91208e-09	0.310771	0.882	0.799	0.000124919
Sgcz	5.31174e-09	0.407174	0.924	0.827	0.000135083
Nrgn	6.14897e-09	-0.31477	0.764	0.869	0.000156375
Plpp3	6.49383e-09	-0.293904	0.887	0.926	0.000165145
Gria2	6.6177e-09	0.285819	0.997	0.984	0.000168295
Arpp19	7.54669e-09	-0.350913	0.317	0.476	0.00019192
Acsl3	7.74791e-09	-0.351291	0.817	0.865	0.000197037
Hpca	1.0255e-08	-0.355196	0.234	0.384	0.000260796
Slc43a2	1.07433e-08	0.303868	0.281	0.146	0.000273212
Rmst	1.23999e-08	-0.428976	0.578	0.694	0.000315342
Igfbp5	1.50318e-08	-0.374078	0.191	0.337	0.000382273
Mt2	1.52728e-08	-0.401745	0.42	0.552	0.000388404
Mgat4c	1.61851e-08	0.389452	0.87	0.786	0.000411604
Hes5	1.70842e-08	-0.450371	0.458	0.608	0.000434468
Camk2n1	2.25336e-08	-0.366099	0.439	0.591	0.000573053
Cspg5	3.00384e-08	-0.314749	0.867	0.891	0.000763907
Mdga2	3.16123e-08	0.286678	0.995	0.988	0.000803932
Arpp21	4.54443e-08	-0.296428	0.837	0.887	0.00115569
Nxn	4.77105e-08	-0.38083	0.365	0.503	0.00121333
Rgs6	5.08589e-08	0.403202	0.794	0.68	0.00129339
Rgcc	5.62293e-08	-0.303989	0.271	0.419	0.00142997
Ddhd1	5.95986e-08	0.344862	0.831	0.778	0.00151565
Hexb	7.47565e-08	-0.296181	0.307	0.45	0.00190113
Farp1	7.78339e-08	-0.291964	0.801	0.867	0.00197939
Adgrb3	1.00711e-07	0.253068	0.997	0.99	0.00256119
Zranb2	1.06179e-07	0.250454	0.92	0.856	0.00270024
Btbd17	1.1691e-07	-0.364146	0.468	0.595	0.00297314
Slc7a2	1.25487e-07	-0.332721	0.309	0.444	0.00319126
Gpc5	1.47073e-07	0.308397	0.885	0.877	0.00374021
Tra2a	1.50895e-07	0.287122	0.929	0.854	0.00383741
Rims2	1.72092e-07	0.265182	0.94	0.879	0.00437648
Nebl	2.56551e-07	0.277316	0.962	0.912	0.00652436
Fzd2	3.01583e-07	-0.32305	0.332	0.466	0.00766957
Lhx2	3.28562e-07	-0.25215	0.171	0.294	0.00835566
Slc4a4	3.42344e-07	0.318924	0.977	0.969	0.00870614
Pacrg	4.5963e-07	-0.367467	0.434	0.569	0.0116888
Kcnip4	4.82881e-07	0.255287	0.945	0.875	0.0122802
Ttyh3	4.87308e-07	-0.290075	0.434	0.565	0.0123927
Tsc22d4	5.18635e-07	-0.279966	0.61	0.739	0.0131894
Sparcl1	5.88858e-07	-0.29611	0.86	0.887	0.0149752
Kcnq1ot1	6.74277e-07	0.291194	0.729	0.645	0.0171475
Dlg2	7.60449e-07	0.252258	0.975	0.947	0.019339
Vegfa	7.77933e-07	-0.330575	0.47	0.596	0.0197836
Rasa2	8.8714e-07	0.345071	0.653	0.561	0.0225608
9330159F19Rik	9.83442e-07	-0.302174	0.502	0.63	0.0250099
Calm1	1.08797e-06	-0.317128	0.904	0.959	0.0276681
Sema6d	1.17042e-06	0.273177	0.889	0.813	0.029765
Atxn1	1.32221e-06	0.276865	0.924	0.84	0.0336251
Fam107a	1.37947e-06	-0.276659	0.317	0.442	0.0350812
Rps10	1.67807e-06	-0.296204	0.417	0.556	0.0426749
Nrg3	1.71428e-06	0.262715	0.839	0.735	0.0435958
Kcnk1	1.75552e-06	-0.332257	0.522	0.634	0.0446447
Cst3	1.98145e-06	-0.254219	0.997	0.998	0.0503903
Calm2	2.00164e-06	-0.316961	0.93	0.953	0.0509036
Pfn2	2.46437e-06	-0.289575	0.339	0.466	0.0626714
Dtx3	2.53417e-06	0.292507	0.598	0.507	0.0644464
Ubc	2.56004e-06	-0.321191	0.565	0.657	0.0651043
Ccdc141	2.58511e-06	0.330892	0.578	0.491	0.065742
Ephb1	2.77643e-06	-0.287712	0.641	0.727	0.0706073
Srgap1	3.88567e-06	0.291327	0.573	0.462	0.0988166
Ppp1r1b	4.40975e-06	-0.259437	0.261	0.386	0.112144
Kcnd2	6.39029e-06	0.40192	0.94	0.889	0.162511
Gstm1	6.75337e-06	-0.331577	0.483	0.608	0.171745
Nnat	6.88495e-06	0.720315	0.625	0.546	0.175091
Nat8f1	7.87275e-06	0.319905	0.444	0.333	0.200212
Camk2d	8.12194e-06	0.307427	0.547	0.448	0.206549
Gja1	8.91309e-06	-0.251599	0.726	0.805	0.226669
Fabp5	9.22957e-06	-0.301986	0.412	0.532	0.234717
Id2	1.15695e-05	-0.31874	0.47	0.571	0.294225
Hepacam	1.19406e-05	-0.253525	0.733	0.786	0.303661
Pde7b	1.5263e-05	0.255375	0.882	0.827	0.388154
Xpo1	1.67171e-05	0.268251	0.503	0.396	0.425132
Gm48765	1.78243e-05	-0.26666	0.282	0.392	0.45329
Slc16a2	1.99295e-05	-0.291961	0.153	0.25	0.506826
Eda	2.80208e-05	-0.314754	0.362	0.474	0.712598
Hdac9	3.14404e-05	0.260133	0.756	0.665	0.799561
Dbi	3.16545e-05	-0.382648	0.61	0.686	0.805006
Ddo	3.80934e-05	0.261492	0.48	0.37	0.968754
Bcan	3.87715e-05	-0.275822	0.794	0.817	0.985997
Wnk2	3.91672e-05	-0.250101	0.419	0.524	0.99606
Apod	4.89564e-05	0.313235	0.39	0.292	1
Zfp462	5.87098e-05	0.250073	0.53	0.433	1
Cd63	6.28374e-05	-0.260552	0.643	0.727	1
Mdk	0.000101631	0.281604	0.568	0.48	1
Snhg11	0.000106822	0.339707	0.955	0.918	1
Gm47271	0.000121539	-0.284085	0.228	0.32	1
Brinp3	0.00015454	0.309343	0.648	0.561	1
Rpl30	0.000191997	-0.256227	0.387	0.495	1
Scg3	0.000202781	-0.269866	0.757	0.772	1
Plce1	0.000223346	0.286212	0.394	0.296	1
Rpl14	0.00024002	-0.252921	0.336	0.429	1
Kcnk2	0.000258018	-0.25136	0.394	0.493	1
Foxo1	0.000267939	-0.274082	0.35	0.435	1
Lrrtm4	0.000281105	0.267894	0.882	0.832	1
Clybl	0.000471206	0.252742	0.671	0.606	1
Luzp2	0.000482505	0.503128	0.822	0.825	1
Dlc1	0.000701184	0.272456	0.379	0.31	1
Tmsb4x	0.000770277	-0.284576	0.628	0.706	1
Pde10a	0.000807118	-0.387518	0.839	0.846	1
Gm12239	0.00122854	0.260117	0.728	0.674	1
Cdh20	0.00183619	0.253197	0.714	0.643	1
Crym	0.00541833	-0.486494	0.302	0.366	1
Plxna4	0.129708	-0.301721	0.218	0.257	1
Nrg1	0.320915	-0.291581	0.917	0.856	1

## Sheet: thiamine_cluster6R61thiaminevsN
Column1	p_val	avg_log2FC	pct.1	pct.2	p_val_adj
Cmss1	2.06484e-37	-0.883097	0.986	0.997	5.25108e-33
Meg3	5.11332e-26	0.404993	1	1	1.30037e-21
AC149090.1	6.84791e-26	-0.810795	0.809	0.983	1.74149e-21
Rbm28	1.48212e-24	0.68639	0.851	0.542	3.76919e-20
Atad2b	3.8455e-23	0.696781	0.84	0.622	9.77949e-19
Gm42418	2.32275e-20	-0.57008	1	1	5.90698e-16
Ube2b	3.60837e-20	0.603511	0.943	0.853	9.17644e-16
Tfrc	1.56063e-16	0.586282	0.816	0.58	3.96885e-12
1700016P03Rik	8.86806e-15	-0.531778	0.043	0.28	2.25524e-10
AY036118	1.09664e-14	-0.531463	0.993	1	2.78887e-10
Malat1	2.46027e-14	-0.306029	1	1	6.25672e-10
Rbm39	8.13396e-14	0.360788	1	0.969	2.06855e-09
Cdr1os	1.02168e-13	0.452384	0.975	0.927	2.59824e-09
Srsf11	1.54751e-13	0.383555	0.986	0.913	3.93547e-09
Apc	5.35553e-13	0.364274	0.972	0.944	1.36196e-08
Gpi1	1.40955e-12	0.521765	0.787	0.636	3.58463e-08
Penk	1.52833e-12	-0.511901	0.11	0.364	3.88671e-08
Magi2	3.74258e-12	0.374405	1	1	9.51777e-08
Pcp4	6.66091e-12	-0.907592	0.454	0.685	1.69394e-07
Gad1	9.78397e-12	-0.705293	0.762	0.829	2.48816e-07
Frmd4a	1.04487e-11	0.31886	1	0.993	2.6572e-07
Ccnl2	1.06975e-11	0.441997	0.777	0.566	2.72048e-07
Pnn	1.50414e-11	0.395359	0.894	0.787	3.82519e-07
Scg2	7.29129e-11	-0.632627	0.699	0.811	1.85425e-06
Rian	1.16275e-10	0.326071	0.996	1	2.95699e-06
Luc7l2	2.43519e-10	0.29532	1	0.986	6.19294e-06
Ei24	5.29322e-10	0.349269	0.599	0.346	1.34612e-05
Smc2	5.61796e-10	0.375564	0.418	0.189	1.4287e-05
Ogt	9.14765e-10	0.374663	0.943	0.923	2.32634e-05
Guf1	9.9341e-10	0.400195	0.695	0.514	2.52634e-05
Lin28b	1.13984e-09	0.478171	0.546	0.336	2.89873e-05
Tle2	1.18083e-09	-0.424544	0.252	0.476	3.00297e-05
Mirg	1.18618e-09	0.402342	0.84	0.675	3.01657e-05
Sfmbt2	1.23649e-09	0.445287	0.415	0.189	3.14451e-05
Etv5	2.14918e-09	-0.439112	0.223	0.444	5.46559e-05
Hnrnpdl	2.92222e-09	0.342248	0.89	0.748	7.4315e-05
Gm47423	3.21573e-09	-0.38294	0.27	0.49	8.17793e-05
Gkap1	4.04206e-09	0.40903	0.752	0.559	0.000102794
Thsd4	4.40743e-09	-0.513431	0.273	0.49	0.000112085
Kit	5.97807e-09	-0.80008	0.426	0.584	0.000152028
A330015K06Rik	9.1645e-09	-0.601361	0.567	0.731	0.000233062
Per1	1.04335e-08	-0.270911	0.078	0.255	0.000265334
Rbm26	1.19268e-08	0.337885	0.936	0.846	0.000303312
Nxph1	1.72209e-08	-0.571239	0.954	0.969	0.000437944
Vstm2b	1.75878e-08	-0.448843	0.482	0.671	0.000447276
9630014M24Rik	1.9537e-08	0.494251	0.695	0.503	0.000496846
4930402H24Rik	3.14612e-08	0.334918	0.968	0.916	0.00080009
Grip1os2	3.62811e-08	-0.522207	0.628	0.78	0.000922666
Uri1	3.68264e-08	0.328344	0.784	0.605	0.000936531
Igfbp4	3.72541e-08	-0.508686	0.202	0.392	0.00094741
Vps41	5.78481e-08	0.361507	0.716	0.542	0.00147113
Kcnab1	7.00264e-08	-0.606584	0.73	0.832	0.00178084
Syn2	8.31821e-08	-0.406624	0.915	0.951	0.0021154
Hs3st2	8.36385e-08	-0.587363	0.383	0.577	0.00212701
Fam155a	8.71863e-08	0.318135	1	0.99	0.00221724
Dlx6os1	9.01006e-08	-0.697817	0.585	0.682	0.00229135
Camk1d	9.12378e-08	-0.354917	0.833	0.934	0.00232027
Snrnp70	9.25574e-08	0.257444	0.989	0.99	0.00235383
Rims4	1.22513e-07	-0.40132	0.415	0.591	0.00311562
Pbx1	1.27807e-07	0.328966	0.702	0.49	0.00325027
Lnpk	1.33363e-07	0.327088	0.773	0.608	0.00339155
Dlgap2	2.08418e-07	-0.403501	0.851	0.927	0.00530029
Relch	2.11391e-07	0.282897	0.745	0.591	0.00537588
Gls	2.1237e-07	0.288473	0.933	0.885	0.00540079
Pnpt1	2.69093e-07	0.34922	0.777	0.608	0.00684331
Cntn1	3.17323e-07	0.322741	0.954	0.899	0.00806985
Taf15	4.39724e-07	0.307922	0.865	0.752	0.0111826
Camk2a	5.29168e-07	-0.352824	0.667	0.825	0.0134573
Tra2a	5.4614e-07	0.283095	0.968	0.92	0.0138889
Kcnd3	5.65088e-07	-0.457678	0.635	0.766	0.0143708
Pakap	6.41299e-07	0.357132	0.642	0.455	0.0163089
Paxbp1	6.54326e-07	0.318184	0.904	0.839	0.0166402
Rhobtb2	7.0327e-07	-0.310691	0.309	0.493	0.0178849
Prpf4b	7.32137e-07	0.287091	0.968	0.965	0.018619
Pthlh	7.82452e-07	-0.576715	0.145	0.304	0.0198985
Son	8.40059e-07	0.271859	0.989	0.955	0.0213635
Gas5	8.40595e-07	0.316893	0.759	0.612	0.0213772
Slc24a5	1.32358e-06	0.293175	0.809	0.668	0.03366
Tcf4	1.55678e-06	-0.390668	0.837	0.913	0.0395906
Galnt14	1.62951e-06	-0.556041	0.56	0.703	0.0414401
Ccdc58	1.83147e-06	0.297267	0.56	0.353	0.0465761
U2surp	1.86865e-06	0.30031	0.879	0.801	0.0475216
Stam2	1.89856e-06	0.27004	0.461	0.276	0.0482822
Kcnc1	1.95969e-06	-0.479898	0.738	0.808	0.0498368
Prrc2c	1.96178e-06	0.279588	0.876	0.811	0.0498901
Cox6a2	2.2799e-06	-0.378869	0.223	0.395	0.05798
Btbd9	2.40461e-06	0.295696	0.631	0.444	0.0611517
Cep164	2.41107e-06	0.337903	0.734	0.615	0.061316
Plekho1	2.46135e-06	-0.311825	0.333	0.503	0.0625945
Adamts17	2.47518e-06	-0.502943	0.589	0.699	0.0629464
Astn2	2.83369e-06	-0.395971	0.972	0.969	0.0720635
Nrsn1	2.95065e-06	-0.323333	0.387	0.57	0.075038
Gabra3	3.28495e-06	0.38186	0.585	0.441	0.0835395
Agbl4	3.43834e-06	0.335637	0.961	0.916	0.0874405
Pde10a	3.58663e-06	-0.353092	0.957	0.997	0.0912116
Gpc3	3.74076e-06	-0.510195	0.145	0.294	0.0951312
Rasa2	4.03168e-06	0.268944	0.574	0.385	0.10253
Oxsr1	4.38477e-06	0.262521	0.45	0.283	0.111509
Mfn1	5.03309e-06	0.303928	0.752	0.601	0.127997
Gpatch8	5.17729e-06	0.286615	0.972	0.934	0.131664
Fstl4	5.26653e-06	-0.48175	0.404	0.58	0.133933
Pea15a	5.55042e-06	-0.252273	0.22	0.385	0.141153
Nr4a1	6.65377e-06	-0.334068	0.163	0.311	0.169212
Dlx1as	6.81677e-06	-0.530968	0.365	0.49	0.173357
Slc25a12	7.2169e-06	0.303154	0.773	0.654	0.183533
Cdc42bpa	7.3432e-06	0.251054	0.901	0.864	0.186745
Frg1	8.29121e-06	-0.282784	0.429	0.591	0.210854
Pcdh9	9.60769e-06	0.351269	0.972	0.955	0.244333
Calm1	1.01462e-05	-0.263422	0.894	0.934	0.258028
Tmem165	1.10939e-05	0.293231	0.592	0.441	0.282128
Hjurp	1.19051e-05	0.261111	0.706	0.545	0.302758
D130043K22Rik	1.21946e-05	-0.256112	0.319	0.49	0.310122
A230006K03Rik	1.22436e-05	0.369934	0.812	0.79	0.311368
Mcu	1.44102e-05	0.251364	0.415	0.248	0.366466
Jmjd1c	1.47348e-05	0.289781	0.876	0.818	0.374721
Adra1a	1.58024e-05	-0.407169	0.482	0.643	0.401872
Sars	1.64937e-05	-0.287588	0.589	0.696	0.419452
Kcnq1ot1	1.67578e-05	0.271905	0.968	0.937	0.426168
Gria1	1.70443e-05	-0.426224	0.848	0.906	0.433454
Sfta3-ps	1.86177e-05	-0.527067	0.447	0.57	0.473468
Lhx6	1.98709e-05	-0.327079	0.305	0.458	0.505336
Arhgap26	1.98901e-05	0.297467	0.858	0.787	0.505825
Il1rapl2	2.02161e-05	-0.941484	0.638	0.699	0.514115
Anapc1	2.04334e-05	0.252267	0.564	0.406	0.519641
Gpr83	2.0802e-05	-0.434334	0.28	0.43	0.529016
Tmsb4x	2.39346e-05	-0.410396	0.578	0.689	0.60868
Micu2	2.44562e-05	0.276382	0.642	0.503	0.621946
Trip12	2.48313e-05	0.268999	0.851	0.829	0.631485
Etv1	2.48721e-05	-0.479189	0.404	0.545	0.632523
Pde4d	2.88215e-05	0.272887	0.996	1	0.732959
Grin2a	2.9536e-05	-0.732765	0.596	0.752	0.751129
Ppip5k2	3.02027e-05	0.296204	0.677	0.573	0.768086
Zbtb16	3.19929e-05	-0.397136	0.358	0.517	0.813611
Nek1	3.29993e-05	0.266076	0.766	0.689	0.839206
Pcsk1n	3.34062e-05	0.39166	0.947	0.892	0.849553
St6galnac3	3.37824e-05	0.31492	0.457	0.304	0.859121
Epm2a	3.62156e-05	0.309499	0.475	0.332	0.920998
Tmx3	3.82173e-05	0.27666	0.631	0.497	0.971905
Fbxl5	4.04221e-05	0.2856	0.709	0.584	1
Sh3rf3	4.13707e-05	-0.387896	0.791	0.86	1
Srsf1	4.57067e-05	-0.284664	0.603	0.703	1
Shtn1	4.59092e-05	0.317038	0.596	0.476	1
Nwd2	4.66428e-05	-0.397653	0.333	0.49	1
Bcl11b	4.78982e-05	-0.277253	0.397	0.559	1
Calm2	4.79061e-05	-0.285334	0.876	0.941	1
Fam120c	4.82954e-05	0.261073	0.539	0.388	1
Gigyf2	5.14502e-05	0.260764	0.752	0.636	1
Zdhhc17	5.18005e-05	0.259201	0.713	0.601	1
Gm35188	5.2324e-05	-0.407623	0.741	0.853	1
Ablim3	5.27867e-05	-0.323896	0.528	0.647	1
Hip1	5.88076e-05	-0.300143	0.312	0.451	1
Slc6a1	6.30968e-05	-0.379342	0.759	0.822	1
Jazf1	6.33029e-05	0.25147	0.762	0.619	1
Myef2	6.54669e-05	0.273661	0.812	0.755	1
Prkce	6.77039e-05	-0.284722	0.929	0.937	1
Pcdh7	6.92582e-05	0.324244	0.816	0.734	1
Nkain3	7.24461e-05	-0.354043	0.66	0.78	1
Tiam1	8.17733e-05	-0.438452	0.745	0.794	1
4921534H16Rik	8.42227e-05	-0.313834	0.22	0.367	1
Dync1i1	8.69813e-05	0.286377	0.883	0.839	1
Gfpt1	0.000109231	-0.25576	0.397	0.538	1
Egfr	0.000112563	-0.662695	0.39	0.507	1
Upp2	0.000114774	0.267324	0.901	0.857	1
Esrrg	0.000118075	0.444602	0.83	0.752	1
Nmnat2	0.000130154	-0.304626	0.787	0.839	1
Cnr1	0.000146618	-0.479462	0.45	0.573	1
Prkg1	0.000147857	0.469191	0.599	0.458	1
Catspere2	0.00015588	0.264246	0.489	0.35	1
Lgi1	0.000161299	-0.307359	0.603	0.71	1
Plekha1	0.000161934	0.272862	0.571	0.462	1
Mafb	0.000164271	-0.276398	0.234	0.378	1
Scaper	0.000165308	0.257359	0.805	0.689	1
Ntrk2	0.000169821	-0.285662	0.933	0.972	1
Dlgap1	0.000171084	-0.291851	1	1	1
Camk2d	0.000172825	0.29518	0.837	0.731	1
Ncald	0.000173661	-0.294285	0.83	0.881	1
Rph3a	0.000176822	-0.310392	0.571	0.647	1
Lpp	0.000182008	0.254021	0.546	0.399	1
Gm21798	0.000186174	-0.358192	0.479	0.587	1
Zfp804a	0.000187082	0.486375	0.745	0.64	1
Trps1	0.00019497	-0.483694	0.66	0.78	1
Sept11	0.000210285	-0.292522	0.436	0.563	1
Hspa4l	0.000210388	0.257449	0.624	0.524	1
Cdh12	0.000211766	0.35548	0.635	0.486	1
Sec14l1	0.000214802	-0.295403	0.443	0.563	1
Crtac1	0.000222982	-0.491716	0.599	0.661	1
Opcml	0.000225473	-0.319719	0.972	0.99	1
Hunk	0.000241724	-0.312503	0.163	0.283	1
Homer1	0.000247777	-0.265661	0.415	0.559	1
Nlgn1	0.000263543	0.259693	0.848	0.762	1
Dusp10	0.000266235	-0.313817	0.199	0.318	1
Afap1	0.000282558	-0.274321	0.447	0.559	1
Rgs7bp	0.000287887	-0.268175	0.844	0.892	1
Cplx2	0.000305196	-0.281408	0.248	0.374	1
Pcsk6	0.000321595	-0.388189	0.298	0.437	1
Luzp2	0.000341076	-0.462317	0.691	0.794	1
Igsf11	0.000397027	-0.34506	0.27	0.392	1
Cntn5	0.000399518	-0.253372	0.798	0.909	1
Cdh10	0.000432085	0.273881	0.723	0.629	1
Lamb1	0.000439134	-0.256627	0.298	0.434	1
Slc25a13	0.000452477	0.253062	0.355	0.227	1
Ptprk	0.000522594	0.384731	0.365	0.238	1
Zc3h12b	0.000527976	0.252327	0.557	0.458	1
Hmgn3	0.00056247	-0.256606	0.571	0.65	1
Lrrc4c	0.000570424	0.330491	0.975	0.885	1
Clstn2	0.000579773	-0.518146	0.585	0.668	1
Dmd	0.000618782	0.301634	0.908	0.867	1
Acyp2	0.000697848	0.250168	0.695	0.591	1
Epha4	0.000698438	-0.333073	0.624	0.713	1
Nnat	0.000768299	-0.529813	0.379	0.493	1
Gm30382	0.000855616	0.278632	0.39	0.252	1
Vps50	0.000882857	0.26087	0.603	0.542	1
Zbtb20	0.000893228	0.289123	0.78	0.675	1
Ndst4	0.000912854	-0.348462	0.351	0.483	1
Npas3	0.00092635	0.311011	0.496	0.385	1
Bsg	0.00096177	0.280079	0.812	0.787	1
Orc3	0.000978982	0.257259	0.543	0.448	1
Ppm1l	0.00102087	-0.429147	0.773	0.78	1
Negr1	0.00102136	-0.255948	0.972	1	1
Cntn6	0.00105044	0.350871	0.684	0.601	1
Gabra4	0.00106829	-0.268185	0.291	0.402	1
Grik1	0.00108617	0.366462	0.755	0.619	1
Wdr17	0.00112375	0.25347	0.532	0.406	1
Rnf144b	0.00113763	-0.417925	0.493	0.566	1
Prkca	0.00116391	-0.345356	0.674	0.759	1
Grk3	0.00121963	-0.327267	0.613	0.654	1
Maf	0.00129624	-0.413758	0.472	0.556	1
Mef2a	0.00138224	-0.324779	0.837	0.853	1
Necab1	0.00152721	-0.268044	0.379	0.517	1
Dlgap4	0.00155197	-0.252052	0.461	0.566	1
Iqsec3	0.00180694	-0.259651	0.674	0.745	1
Megf11	0.00233019	-0.368315	0.362	0.462	1
Klhl29	0.00239643	-0.272701	0.879	0.902	1
Sox5	0.00244552	-0.36948	0.606	0.671	1
Kcnt2	0.00246682	0.341134	0.535	0.413	1
Cdh13	0.0025295	-0.301608	0.784	0.811	1
Stmn1	0.00271454	-0.273146	0.355	0.451	1
Gm47027	0.0028199	-0.250707	0.422	0.517	1
Cntnap4	0.00284727	-0.298892	0.755	0.794	1
Iqsec1	0.00286504	-0.323246	0.816	0.836	1
Gpr176	0.00325572	-0.270478	0.543	0.65	1
Vsnl1	0.00328601	-0.306708	0.887	0.906	1
Slc24a2	0.00342738	0.257843	0.883	0.874	1
4933413L06Rik	0.00357645	-0.266452	0.351	0.455	1
Mtus2	0.00358767	-0.251874	0.713	0.78	1
Enox1	0.00367754	-0.382655	0.766	0.79	1
Lgr5	0.00410624	-0.316445	0.248	0.36	1
Parm1	0.00411461	-0.341852	0.291	0.381	1
Grid2	0.00463755	0.47837	0.713	0.668	1
Myo1e	0.00501167	-0.376939	0.181	0.262	1
Gm20754	0.00547217	0.426994	0.362	0.259	1
Neto1	0.00601429	-0.286698	0.539	0.65	1
Lysmd4	0.00636848	-0.296154	0.571	0.633	1
Erbb4	0.00665854	-0.4053	0.975	0.962	1
Rgs6	0.00673669	0.36109	0.337	0.241	1
Npy	0.00687951	-1.3287	0.365	0.451	1
Gpc6	0.00700612	0.331623	0.624	0.535	1
Grip1	0.00743549	-0.333522	1	1	1
Hs3st5	0.00769235	0.299581	0.422	0.336	1
Rnf220	0.00821252	0.36304	0.433	0.36	1
Cntnap3	0.00842399	-0.282726	0.55	0.622	1
Nrcam	0.00858553	-0.293666	0.933	0.93	1
Fndc1	0.0095588	-0.254814	0.245	0.325	1
Vwc2	0.00969115	-0.29141	0.734	0.748	1
Slc4a4	0.00996554	-0.340843	0.578	0.619	1
Sphkap	0.0101349	-0.29028	0.493	0.566	1
Cemip	0.0102397	-0.370321	0.379	0.451	1
Nfib	0.0103165	-0.276092	0.564	0.633	1
Nrg1	0.0114061	0.306427	0.667	0.563	1
Rgs9	0.0122504	-0.262892	0.199	0.28	1
Pde3a	0.0131114	-0.439341	0.33	0.399	1
Nek7	0.0134847	-0.287802	0.298	0.374	1
Kcnip1	0.0135428	-0.351323	0.819	0.843	1
Col19a1	0.014158	-0.479895	0.489	0.552	1
Sdk1	0.0143221	0.496015	0.333	0.255	1
Slc2a13	0.014349	-0.250172	0.915	0.906	1
Moxd1	0.0151551	-0.274045	0.383	0.469	1
Kcnh7	0.0170239	0.265753	0.918	0.899	1
Kcnq3	0.0203437	-0.41479	0.755	0.752	1
Cdh4	0.0204153	-0.269856	0.504	0.58	1
Mgat4c	0.0239773	0.4064	0.674	0.654	1
Gm28376	0.0245021	-0.255454	0.348	0.42	1
Kcnmb2	0.0256913	0.264364	0.755	0.713	1
Ghr	0.0259816	-0.446444	0.482	0.549	1
Satb1	0.0286141	0.28071	0.387	0.311	1
Lgi2	0.0289583	-0.310251	0.461	0.517	1
Zfp804b	0.0301343	0.601145	0.39	0.304	1
Car10	0.0347561	0.377697	0.259	0.196	1
Caln1	0.0533817	-0.291238	0.525	0.587	1
Nos1	0.0645657	-0.700607	0.223	0.276	1
Kcnq5	0.0846059	-0.273466	0.649	0.696	1
Tac1	0.0874225	0.290799	0.326	0.273	1
Kcnn2	0.100111	-0.289916	0.738	0.776	1
Tacr1	0.102929	-0.352339	0.241	0.297	1
Ptprm	0.127179	-0.274996	0.702	0.752	1
Slit2	0.153754	0.343182	0.344	0.308	1
Kirrel3	0.195153	-0.297182	0.809	0.846	1
Gm38505	0.196212	-0.451215	0.429	0.458	1
Gm15398	0.230796	-0.479909	0.706	0.664	1
Efna5	0.266731	-0.302412	0.741	0.773	1
Sox2ot	0.29235	-0.274168	0.518	0.545	1
6330403K07Rik	0.322477	-0.25442	0.433	0.43	1
Col25a1	0.343015	-0.360648	0.323	0.346	1
Cpne4	0.412697	-0.286393	0.255	0.287	1
Pcdh15	0.419123	-0.378725	0.844	0.815	1
Sst	0.637527	-0.89391	0.447	0.441	1
Ptprt	0.902483	-0.291099	0.493	0.448	1

## Sheet: thiamine_cluster7R61thiaminevsN
Column1	p_val	avg_log2FC	pct.1	pct.2	p_val_adj
Cmss1	1.47364e-26	-0.743524	1	1	3.74762e-22
AY036118	1.02726e-17	-0.578054	0.996	1	2.61242e-13
Penk	4.11169e-16	-0.717797	0.158	0.514	1.04564e-11
Epn2	3.10726e-15	-0.634843	0.793	0.989	7.90206e-11
Nkain2	1.57074e-14	1.01354	0.94	0.76	3.99455e-10
Pdgfra	4.92045e-13	-0.713972	0.646	0.866	1.25132e-08
Pak3	2.17095e-12	0.732674	0.867	0.659	5.52094e-08
Gm42418	5.00798e-12	-0.417393	1	1	1.27358e-07
Gm38505	5.69861e-12	-0.737877	0.554	0.832	1.44921e-07
Apod	1.03889e-11	0.989563	0.498	0.218	2.64201e-07
Cspg5	1.79539e-11	-0.658069	0.66	0.894	4.56586e-07
Ogt	2.08888e-11	0.55797	0.898	0.799	5.31224e-07
Clu	4.35154e-11	0.857515	0.568	0.313	1.10664e-06
St18	5.91958e-11	1.03568	0.512	0.201	1.50541e-06
Npy	7.49239e-11	-0.415443	0.067	0.285	1.90539e-06
Tmem100	7.5079e-11	-0.559971	0.4	0.715	1.90933e-06
Rbm39	1.37618e-10	0.436884	1	0.994	3.49978e-06
Kcnk10	2.62538e-10	-0.590938	0.218	0.48	6.6766e-06
Plp1	3.07112e-10	0.503479	0.853	0.665	7.81016e-06
Ttyh2	3.46995e-10	0.576188	0.354	0.101	8.82443e-06
Megf11	3.6283e-10	-0.572872	0.551	0.832	9.22714e-06
Dpysl3	4.15851e-10	-0.584747	0.358	0.62	1.05755e-05
Etv4	6.18147e-10	-0.495323	0.305	0.615	1.57201e-05
4930445B16Rik	7.242e-10	-0.523398	0.309	0.587	1.84171e-05
Fabp7	1.00342e-09	-0.473402	0.211	0.475	2.55181e-05
Gpc5	1.16174e-09	-0.612522	0.751	0.916	2.95441e-05
Trpm3	1.24847e-09	-0.595422	0.309	0.575	3.17498e-05
Clasp2	1.27332e-09	0.52606	0.933	0.883	3.23819e-05
Shc3	1.72754e-09	-0.482473	0.232	0.503	4.39332e-05
AC149090.1	2.02401e-09	-0.531546	0.909	0.944	5.14725e-05
Sox2ot	2.9052e-09	-0.462978	0.916	0.978	7.38822e-05
Rpl13	3.49503e-09	-0.470447	0.849	0.966	8.88821e-05
March1	3.61476e-09	-0.561521	0.786	0.894	9.19269e-05
Xylt1	3.95998e-09	-0.485735	0.874	0.95	0.000100706
Camk1d	4.4264e-09	-0.405834	0.86	0.939	0.000112568
1700047M11Rik	7.94172e-09	0.619899	0.653	0.408	0.000201966
Ptprz1	8.20207e-09	-0.478705	0.919	0.961	0.000208587
Epas1	9.72561e-09	-0.457721	0.151	0.374	0.000247332
Hpca	1.07744e-08	-0.469154	0.137	0.352	0.000274003
Kif21a	1.29323e-08	0.467186	0.765	0.547	0.000328882
S100a1	1.40086e-08	-0.522904	0.386	0.637	0.000356253
Ednrb	1.47895e-08	-0.592392	0.407	0.642	0.000376111
Enpp6	1.57832e-08	0.340087	0.382	0.117	0.000401383
Cspg4	1.7151e-08	-0.448244	0.491	0.765	0.000436166
Kcnip3	2.11157e-08	-0.491488	0.565	0.804	0.000536992
Rbfox1	2.19704e-08	-0.557771	0.954	0.927	0.000558729
Gm20713	2.28371e-08	-0.531116	0.46	0.715	0.000580771
Luc7l2	2.40283e-08	0.429995	0.989	0.961	0.000611063
Dnah5	2.79137e-08	-0.493359	0.098	0.296	0.000709875
Olfm2	3.1584e-08	-0.430524	0.368	0.648	0.000803213
Cdo1	3.72518e-08	-0.447995	0.235	0.475	0.000947351
Samd4	5.48684e-08	-0.4516	0.372	0.62	0.00139536
Pcp4	5.56982e-08	-0.668952	0.656	0.804	0.00141646
Shc4	6.77047e-08	-0.464986	0.382	0.637	0.0017218
Olig1	6.93143e-08	-0.428412	0.726	0.894	0.00176273
Lrch3	7.87092e-08	0.457102	0.733	0.553	0.00200165
Rtl4	8.39506e-08	-0.656281	0.361	0.615	0.00213495
Ank2	9.3527e-08	0.435779	0.982	0.983	0.00237848
Col11a1	1.15429e-07	-0.442843	0.204	0.43	0.00293549
Kcnd3	1.20737e-07	-0.543997	0.421	0.637	0.00307045
Cacng4	1.39382e-07	-0.494904	0.684	0.838	0.00354464
C1ql1	1.42688e-07	-0.475022	0.582	0.827	0.0036287
Ddx5	1.51099e-07	0.397845	0.996	1	0.00384259
Pdzd2	1.8964e-07	-0.446036	0.432	0.67	0.00482273
Lrrc4c	1.95233e-07	-0.375258	0.996	0.989	0.00496496
Kcnq1ot1	2.00168e-07	0.442282	0.891	0.788	0.00509046
Son	2.01138e-07	0.384338	1	0.989	0.00511514
Pou3f1	2.09232e-07	-0.369622	0.189	0.408	0.00532097
Hdgf	2.3507e-07	-0.264682	0.116	0.313	0.00597806
Grin3a	2.40272e-07	-0.479543	0.674	0.821	0.00611037
Armh4	2.5273e-07	-0.451126	0.533	0.721	0.00642718
Srsf11	2.61699e-07	0.392801	0.944	0.838	0.00665527
Mapk4	2.68407e-07	-0.383251	0.154	0.369	0.00682586
Abhd2	2.78463e-07	-0.431721	0.582	0.821	0.00708159
Tubb4a	3.04614e-07	0.476721	0.621	0.385	0.00774665
Zeb1	3.12335e-07	-0.421411	0.877	0.95	0.00794299
Srgap1	3.19998e-07	-0.385911	0.726	0.866	0.00813788
Trnp1	3.26584e-07	-0.421345	0.196	0.402	0.00830535
Gm2164	3.28808e-07	-0.453549	0.333	0.559	0.00836193
Etv5	3.30712e-07	-0.389693	0.288	0.525	0.00841033
Mpp6	3.54055e-07	-0.393664	0.337	0.564	0.00900396
Enpp2	4.11575e-07	0.523645	0.863	0.771	0.0104668
Slc1a2	4.52134e-07	-0.284799	0.474	0.715	0.0114982
Kcnip1	5.69538e-07	-0.394222	0.323	0.559	0.0144839
Nxph1	6.16257e-07	-0.392294	0.909	0.955	0.015672
App	6.28114e-07	0.389628	0.937	0.894	0.0159736
Rnf157	6.63588e-07	-0.310371	0.295	0.547	0.0168757
Lhfpl3	7.23517e-07	-0.387708	0.961	0.961	0.0183998
Spred2	8.11726e-07	-0.327756	0.218	0.441	0.020643
Kif19a	9.44931e-07	0.266841	0.333	0.117	0.0240305
Ptgds	1.03621e-06	0.974502	0.537	0.341	0.0263519
Ncan	1.14574e-06	-0.341599	0.228	0.447	0.0291373
Dclk1	1.19755e-06	-0.353973	0.849	0.911	0.030455
Sgms1	1.36672e-06	-0.400666	0.418	0.62	0.034757
Rcc2	1.41433e-06	-0.261964	0.102	0.274	0.0359678
Cntn4	1.72991e-06	-0.4019	0.926	0.939	0.0439934
Sdc3	1.85955e-06	-0.381126	0.298	0.508	0.0472901
Inpp4b	1.86667e-06	-0.498452	0.351	0.559	0.0474713
Chst11	1.97339e-06	-0.342221	0.554	0.81	0.0501854
Map2	2.09344e-06	0.412823	0.986	0.927	0.0532384
Vxn	2.1261e-06	-0.328556	0.372	0.615	0.0540688
Rpl14	2.26895e-06	-0.300555	0.316	0.553	0.0577017
Vcan	2.79534e-06	-0.420312	0.895	0.944	0.0710884
Tafa1	2.79645e-06	-0.51309	0.421	0.62	0.0711164
Hes5	2.83595e-06	-0.567167	0.274	0.475	0.072121
Ccnd1	2.87305e-06	-0.354975	0.256	0.475	0.0730645
Vegfa	3.30545e-06	-0.396269	0.277	0.492	0.0840609
Csnk2a2	3.48013e-06	-0.421483	0.435	0.637	0.0885032
Sparc	3.4878e-06	0.543479	0.295	0.117	0.0886983
Sgk1	3.67932e-06	-0.438871	0.425	0.626	0.0935689
B9d1	3.86653e-06	-0.258912	0.13	0.302	0.0983298
Tmem176a	3.9829e-06	-0.290784	0.277	0.497	0.101289
Rps25	4.04217e-06	-0.310456	0.256	0.48	0.102796
Plpp4	4.39585e-06	-0.42124	0.456	0.648	0.111791
Dynll1	4.7655e-06	-0.458849	0.484	0.676	0.121191
Fxyd6	4.94802e-06	0.59352	0.618	0.497	0.125833
Ntrk3	5.73341e-06	-0.362945	0.811	0.877	0.145806
Ccser2	6.60318e-06	0.397978	0.751	0.57	0.167925
Itgav	6.7994e-06	-0.380348	0.46	0.659	0.172915
Pou3f3	6.831e-06	-0.25205	0.189	0.385	0.173719
Mif	6.89185e-06	-0.389432	0.481	0.67	0.175267
6330411D24Rik	6.93925e-06	-0.343838	0.13	0.296	0.176472
Syngr1	7.44185e-06	-0.314068	0.196	0.38	0.189254
Gpcpd1	7.4751e-06	0.450988	0.86	0.765	0.190099
S100a16	9.46105e-06	-0.46893	0.547	0.715	0.240604
Rev3l	1.00515e-05	-0.381364	0.8	0.916	0.255621
Pabpc1	1.1049e-05	-0.275293	0.158	0.335	0.280986
Lbh	1.1755e-05	-0.292864	0.228	0.425	0.298941
Gatm	1.29677e-05	0.503172	0.74	0.648	0.329781
P4ha1	1.40974e-05	-0.260105	0.316	0.542	0.358512
Camk2n1	1.47308e-05	-0.323079	0.242	0.436	0.374618
Zdhhc14	1.56651e-05	0.346656	0.86	0.749	0.398379
Spred1	1.56814e-05	-0.334093	0.509	0.698	0.398794
Rgcc	1.61574e-05	-0.38642	0.607	0.788	0.410898
Marcks	1.68283e-05	-0.380185	0.653	0.81	0.42796
Camk1	1.70279e-05	-0.30281	0.277	0.464	0.433036
Neto1	1.75674e-05	-0.424564	0.67	0.765	0.446756
Olig2	1.90977e-05	-0.337392	0.516	0.715	0.485673
AI480526	2.1452e-05	0.409168	0.432	0.257	0.545547
Plk2	2.23766e-05	-0.318331	0.119	0.268	0.56906
Pitpnc1	2.25326e-05	-0.306972	0.4	0.62	0.573025
Emid1	2.28904e-05	-0.368138	0.505	0.676	0.582127
Vwc2	2.36284e-05	-0.293635	0.186	0.363	0.600895
Snrnp70	2.72671e-05	0.279167	0.993	0.983	0.69343
Hlf	2.78553e-05	-0.271395	0.179	0.358	0.708388
Arhgap23	2.78951e-05	0.419195	0.453	0.274	0.709401
Zcchc24	2.84063e-05	-0.273523	0.396	0.603	0.722401
Slc13a5	2.98258e-05	-0.29707	0.161	0.324	0.7585
Cdh18	3.02513e-05	0.421205	0.804	0.654	0.76932
Serpine2	3.16186e-05	-0.308282	0.853	0.933	0.804093
Thsd7b	3.31195e-05	-0.288173	0.351	0.559	0.842263
Gm10863	3.31775e-05	0.339528	0.425	0.24	0.843737
Rgs20	3.32764e-05	-0.345426	0.319	0.514	0.846251
Chst9	3.49332e-05	-0.323434	0.147	0.307	0.888386
4930402H24Rik	3.50253e-05	0.33893	0.898	0.76	0.890729
Bcas1	3.5241e-05	0.266248	0.874	0.782	0.896213
Zfp462	3.52719e-05	-0.33664	0.789	0.922	0.897
Gm3764	3.59726e-05	-0.311323	0.611	0.827	0.914819
Sgcd	3.84524e-05	0.33087	0.951	0.933	0.977882
Smpd3	3.89922e-05	-0.28861	0.126	0.274	0.99161
Ppp1r14b	4.40398e-05	-0.250527	0.309	0.514	1
Znrf3	4.79566e-05	-0.337649	0.274	0.453	1
Prkg2	4.82745e-05	-0.267761	0.228	0.402	1
Bach2	4.91111e-05	-0.309391	0.495	0.709	1
Nav3	4.92834e-05	-0.286949	0.954	0.939	1
Galnt3	5.09446e-05	-0.358366	0.432	0.598	1
Wnk3	5.49968e-05	-0.260116	0.168	0.33	1
Neto2	5.73107e-05	-0.283979	0.263	0.441	1
Rbms3	5.73551e-05	-0.371626	0.463	0.62	1
Rpl29	5.78113e-05	-0.334117	0.407	0.598	1
Zbtb20	5.89861e-05	0.310277	0.993	0.989	1
Cdh19	6.07436e-05	0.4577	0.495	0.346	1
Phactr3	6.19055e-05	-0.281374	0.758	0.916	1
Cmtm5	6.4968e-05	0.395493	0.449	0.274	1
Hecw1	6.79643e-05	-0.295007	0.221	0.391	1
Arhgap5	6.88815e-05	0.451361	0.639	0.525	1
Plcl1	7.22995e-05	0.457493	0.835	0.698	1
Plpp3	7.44477e-05	-0.309666	0.558	0.726	1
Ablim2	7.71581e-05	0.322303	0.572	0.397	1
Usp19	7.75971e-05	-0.287329	0.193	0.352	1
Camkv	7.84881e-05	-0.282669	0.133	0.279	1
Ckb	8.09992e-05	-0.2512	0.975	0.989	1
Luc7l3	8.17027e-05	0.355715	0.856	0.816	1
Pou2f1	8.22666e-05	-0.28649	0.439	0.626	1
Csmd2	8.7763e-05	-0.307338	0.811	0.922	1
Rab3c	9.04533e-05	-0.276723	0.319	0.503	1
Gm47423	9.05972e-05	-0.257426	0.123	0.263	1
Nkain3	9.51458e-05	-0.46981	0.442	0.62	1
Gpt2	9.63335e-05	-0.337692	0.428	0.609	1
Lgi3	0.000105182	0.283856	0.26	0.112	1
Dbndd2	0.000112564	0.437453	0.495	0.341	1
Tgfa	0.000114732	-0.273003	0.421	0.598	1
Eid1	0.00011607	0.344157	0.484	0.324	1
Dapk1	0.000117062	0.398102	0.281	0.145	1
Ldlrad3	0.000117565	0.320385	0.456	0.296	1
Nol7	0.000119618	-0.28528	0.151	0.296	1
Cdh13	0.000120629	-0.297513	0.726	0.888	1
Marcksl1	0.000121824	-0.250362	0.151	0.302	1
Hexb	0.000124103	-0.290611	0.253	0.419	1
Ppp1r1b	0.000127864	-0.259934	0.179	0.335	1
Mmp15	0.000127911	-0.348069	0.193	0.335	1
Scg5	0.000134552	0.402404	0.818	0.782	1
Tnrc6c	0.000136685	0.257289	0.944	0.855	1
Pmepa1	0.000138187	-0.393774	0.319	0.475	1
Grm5	0.000140003	-0.330364	0.933	0.944	1
Cdk8	0.000140061	-0.295259	0.765	0.894	1
Marc2	0.000141965	-0.283979	0.4	0.592	1
G0s2	0.000144006	-0.294439	0.456	0.62	1
Akt3	0.000149225	0.320858	0.923	0.916	1
Grik3	0.000151042	-0.276526	0.277	0.447	1
Mog	0.000157863	0.435085	0.281	0.14	1
Ppfibp1	0.000158199	-0.322653	0.695	0.844	1
Tafa2	0.000162673	-0.328259	0.467	0.67	1
Gpm6b	0.000167427	0.2971	0.982	0.978	1
6330576A10Rik	0.000167895	-0.321418	0.235	0.391	1
Tubb2b	0.000176504	-0.270612	0.239	0.402	1
Cobl	0.000179253	-0.325599	0.6	0.771	1
Atp1b2	0.000180204	-0.265861	0.154	0.296	1
Rpl39	0.000181354	-0.255965	0.204	0.363	1
Gm35188	0.000185265	0.311296	0.589	0.447	1
Chl1	0.000190791	-0.390749	0.463	0.631	1
Polr2a	0.000192393	0.322455	0.326	0.179	1
Sgcz	0.000194566	-0.448517	0.937	0.922	1
Meg3	0.000203907	0.391926	0.975	0.955	1
Mdk	0.000205768	-0.296837	0.33	0.497	1
Pde7b	0.000208545	-0.31796	0.789	0.838	1
Snx3	0.000208797	-0.285835	0.354	0.536	1
Arpp19	0.000210678	-0.289132	0.316	0.486	1
Pnn	0.000211161	0.316561	0.818	0.693	1
Ptprr	0.000211888	-0.279982	0.249	0.419	1
Itgb8	0.000216217	-0.31499	0.333	0.492	1
Rpl10a	0.000216472	-0.317823	0.446	0.609	1
A230006K03Rik	0.000217278	0.315639	0.323	0.173	1
Flnb	0.000219648	0.460482	0.421	0.302	1
Trf	0.00022202	0.556014	0.316	0.184	1
Sparcl1	0.000223797	-0.276371	0.579	0.737	1
Adcy8	0.000232704	-0.302103	0.168	0.307	1
Prickle2	0.000247474	0.354319	0.856	0.765	1
Slc35f1	0.000265573	-0.279372	0.951	0.955	1
H2afz	0.000270897	-0.409122	0.389	0.559	1
Lrp1	0.000286926	-0.308432	0.621	0.782	1
Bcl2	0.000301576	-0.26276	0.158	0.296	1
Dbi	0.00030247	-0.330746	0.747	0.866	1
Cald1	0.000304415	0.399387	0.702	0.603	1
Fgf13	0.000312183	-0.35352	0.189	0.335	1
E130114P18Rik	0.000314853	-0.356129	0.467	0.615	1
S100a6	0.000316451	-0.275461	0.204	0.352	1
Glis1	0.000316655	0.255713	0.281	0.14	1
Tspan7	0.000324685	-0.250728	0.828	0.916	1
Ankrd11	0.000327033	-0.279993	0.853	0.927	1
Fhod3	0.00033369	-0.251825	0.154	0.291	1
Ostf1	0.000340813	-0.296837	0.372	0.536	1
Fam234a	0.000342713	0.367181	0.453	0.307	1
Kank1	0.000345282	-0.338773	0.674	0.788	1
Ppp2r3a	0.00034569	0.376303	0.737	0.654	1
Col27a1	0.000346792	0.372975	0.253	0.123	1
Tasor	0.000347091	0.403806	0.646	0.581	1
Sema3d	0.000351334	-0.294439	0.604	0.754	1
Etv1	0.000363172	-0.330773	0.344	0.514	1
Rps27a	0.000368082	-0.339414	0.386	0.542	1
Dock9	0.000377374	-0.290839	0.744	0.86	1
Rasgrf1	0.000391745	-0.292491	0.358	0.508	1
Rnpc3	0.000394017	0.339941	0.705	0.631	1
Tmem121	0.00039714	-0.257254	0.228	0.374	1
Rbm26	0.000400092	0.299669	0.94	0.888	1
Kcnh8	0.000407009	-0.3003	0.593	0.749	1
Nalcn	0.000413797	0.269097	0.888	0.799	1
Gm10125	0.000420297	-0.363704	0.277	0.419	1
Aig1	0.000423859	0.33284	0.674	0.542	1
Cryab	0.000428176	0.487427	0.537	0.397	1
Ubap2	0.000428668	-0.268631	0.242	0.391	1
Stmn4	0.000439599	0.361027	0.393	0.251	1
Zswim5	0.000440098	-0.284178	0.375	0.57	1
Dusp15	0.000447516	0.360336	0.474	0.341	1
Retreg1	0.000458053	0.356021	0.375	0.24	1
Cdk12	0.000467884	0.282077	0.684	0.553	1
Scd2	0.000468429	0.361968	0.849	0.743	1
Ldb2	0.000471983	-0.279533	0.239	0.391	1
Sox4	0.000493273	-0.363493	0.347	0.497	1
Itga9	0.000494173	-0.442928	0.54	0.665	1
Hip1	0.000505213	-0.29123	0.582	0.721	1
Klf9	0.000544201	-0.299961	0.193	0.33	1
Gad1	0.00056748	-0.283186	0.26	0.408	1
Alk	0.000571119	-0.34161	0.242	0.385	1
Itm2b	0.000580198	0.348954	0.961	0.955	1
Ptov1	0.000586388	-0.285111	0.274	0.419	1
2900052L18Rik	0.000615312	0.290147	0.26	0.134	1
Gsap	0.000637317	-0.260069	0.386	0.542	1
Stk32a	0.000654464	-0.310208	0.54	0.693	1
Csrp1	0.000659317	0.295367	0.277	0.145	1
Mmp16	0.000665212	-0.322821	0.849	0.911	1
Fgd4	0.00069211	0.338584	0.319	0.184	1
Hif1a	0.000708428	-0.263054	0.27	0.425	1
St5	0.000734011	0.296133	0.326	0.19	1
Grik2	0.000770519	0.294556	1	1	1
Mast2	0.000787397	-0.306662	0.361	0.503	1
Astn1	0.000799153	0.326144	0.804	0.777	1
Itpk1	0.000800856	0.25895	0.263	0.134	1
Gria3	0.000807523	-0.275015	0.916	0.916	1
Zdhhc20	0.000816262	0.299935	0.6	0.486	1
Rin2	0.000838622	-0.296689	0.586	0.726	1
Sox5os4	0.000842739	-0.271562	0.193	0.324	1
Rplp1	0.00086154	-0.259857	0.526	0.698	1
Upf2	0.000869089	-0.276199	0.372	0.525	1
Mapre2	0.000869617	0.398611	0.593	0.497	1
Mgat5b	0.000880231	-0.258355	0.256	0.397	1
Camk2d	0.000902143	0.388225	0.6	0.48	1
Dlg1	0.000912405	0.361754	0.804	0.754	1
Thrb	0.000956572	0.287177	0.723	0.648	1
Usp24	0.000971609	-0.255031	0.737	0.877	1
Ptms	0.000985128	-0.252885	0.351	0.508	1
Usp29	0.00103372	-0.387209	0.204	0.33	1
Nim1k	0.00105109	-0.26501	0.2	0.335	1
Snx1	0.00106716	-0.282481	0.509	0.654	1
Rbm25	0.00109836	0.296094	0.821	0.765	1
Pard3b	0.00110757	0.328998	0.425	0.291	1
Kcnk2	0.00114254	-0.262629	0.404	0.575	1
Mtss2	0.00114549	-0.271442	0.579	0.743	1
Grik1	0.00115121	-0.267895	0.354	0.514	1
Elmo1	0.00117327	0.292224	0.877	0.788	1
Alcam	0.00117893	-0.264906	0.93	0.922	1
Mbnl2	0.0012102	0.291492	0.919	0.816	1
Cox8a	0.00123636	-0.266671	0.568	0.765	1
Klhl5	0.00134053	-0.304033	0.607	0.704	1
Rnf13	0.00134743	0.33357	0.54	0.441	1
Rsrc1	0.00145866	0.302164	0.681	0.587	1
Mir9-3hg	0.00147737	-0.256891	0.716	0.844	1
Taok3	0.00152882	-0.267105	0.312	0.453	1
Mmd2	0.00154914	-0.252937	0.396	0.536	1
Nsd3	0.00155035	0.251987	0.698	0.626	1
Btf3	0.00157283	-0.253845	0.347	0.486	1
Iqsec1	0.00162236	0.280702	0.382	0.257	1
Elavl1	0.00164029	-0.26328	0.368	0.525	1
Prkca	0.00168208	0.278683	0.909	0.844	1
Calcrl	0.0016968	-0.259987	0.481	0.637	1
Pip5k1b	0.00174309	-0.304794	0.267	0.397	1
A330076H08Rik	0.00179513	0.351178	0.6	0.503	1
Pkp4	0.00190429	0.297971	0.586	0.458	1
Arhgef40	0.00196747	-0.252007	0.228	0.352	1
Chd2	0.00207654	0.325395	0.695	0.581	1
Nap1l5	0.00210266	0.314157	0.6	0.497	1
Guf1	0.00212691	0.250826	0.354	0.229	1
Gria2	0.00214275	0.252244	1	0.978	1
Jam3	0.00217757	0.267258	0.575	0.419	1
Gpatch8	0.00221182	0.291552	0.94	0.905	1
Atp8a1	0.00227447	0.279082	0.863	0.749	1
Mpped2	0.00232103	0.283483	0.856	0.827	1
Sdccag8	0.00233343	0.29839	0.411	0.291	1
Wipf1	0.00249617	-0.27882	0.568	0.682	1
Rnf150	0.00257864	-0.283486	0.33	0.458	1
Ifi27	0.00265886	0.301517	0.677	0.57	1
Wls	0.00267019	0.376932	0.477	0.352	1
Rbm5	0.00267039	0.268545	0.779	0.76	1
Chd3	0.00277534	0.386889	0.554	0.458	1
Neo1	0.00288313	0.260399	0.74	0.687	1
Rgs7bp	0.00294934	-0.285671	0.656	0.765	1
Gm32509	0.00301978	-0.339844	0.712	0.804	1
Pstpip2	0.00306793	-0.276011	0.232	0.352	1
Prkn	0.00323422	0.302732	0.954	0.927	1
Ppia	0.0032394	0.254638	0.968	0.911	1
Prune2	0.00330469	0.270957	0.537	0.419	1
A230057D06Rik	0.00338458	0.276016	0.881	0.816	1
Nrg3	0.00350444	-0.284554	0.937	0.899	1
Lima1	0.00356877	-0.336709	0.446	0.542	1
Npc1	0.00358079	-0.253845	0.354	0.497	1
Gjc3	0.0036347	-0.318654	0.832	0.899	1
Cntn3	0.0036385	-0.266772	0.425	0.542	1
Tox3	0.0037204	-0.284199	0.432	0.536	1
Fstl5	0.00395005	-0.255965	0.228	0.358	1
Lypd6	0.00395765	-0.252289	0.246	0.369	1
Plekhm3	0.0040968	0.264181	0.344	0.235	1
Reps2	0.00441964	0.34692	0.463	0.369	1
Kctd8	0.00497466	-0.294184	0.382	0.503	1
Wdr33	0.00575095	0.271542	0.688	0.626	1
Itm2c	0.00578665	0.311751	0.825	0.793	1
Copg2	0.00589729	0.326607	0.519	0.469	1
Calm2	0.00615039	-0.276983	0.888	0.905	1
C430049B03Rik	0.00629644	-0.274606	0.361	0.475	1
Thsd7a	0.0065745	-0.263467	0.789	0.832	1
Nrxn2	0.0068316	-0.259454	0.695	0.777	1
Fbxl16	0.00760256	-0.255965	0.161	0.251	1
Atp9a	0.00765045	0.301477	0.568	0.514	1
Col9a3	0.00818068	0.269441	0.418	0.302	1
Timp4	0.00857211	-0.26033	0.368	0.48	1
Nrgn	0.00882355	-0.25049	0.611	0.709	1
Tmem117	0.0090327	0.292185	0.288	0.184	1
Lrpap1	0.00979781	0.281018	0.537	0.464	1
Gab1	0.00990026	0.257132	0.66	0.559	1
Map7	0.0100385	0.285303	0.66	0.592	1
Gls	0.0100851	0.259795	0.66	0.587	1
Arhgef10	0.0107466	0.275714	0.393	0.291	1
Gabrg3	0.0108279	-0.274923	0.825	0.804	1
St6galnac3	0.0110659	0.289232	0.674	0.598	1
Mir100hg	0.0112465	0.317517	0.937	0.911	1
Smoc1	0.011679	0.284604	0.425	0.335	1
Ccnl2	0.0117782	0.264147	0.625	0.575	1
Limch1	0.011782	0.256647	0.667	0.587	1
Edil3	0.0129745	0.282091	0.93	0.866	1
Dhx36	0.0131961	0.268625	0.635	0.609	1
Prrx1	0.0133475	-0.288205	0.386	0.486	1
Mthfs	0.0134979	0.265539	0.337	0.24	1
Ralgps1	0.0142482	0.267032	0.537	0.486	1
Zfp536	0.0146171	0.265462	0.625	0.57	1
Sema3e	0.0168473	-0.267345	0.302	0.402	1
Map4k5	0.0168906	0.264571	0.551	0.503	1
Gm4876	0.017564	-0.272047	0.786	0.849	1
Frmd4b	0.0207483	0.276909	0.354	0.251	1
Aplp1	0.0234411	0.315857	0.684	0.648	1
Pde10a	0.0257459	-0.469587	0.853	0.838	1
Ano3	0.0269595	-0.280147	0.428	0.492	1
Cntn6	0.0275012	0.320909	0.804	0.799	1
Snhg20	0.0297419	0.256603	0.611	0.581	1
Itpr2	0.0346619	-0.257725	0.768	0.872	1
Stat1	0.0399165	0.300239	0.298	0.229	1
Plxdc2	0.0430075	0.31915	0.432	0.363	1
Camk4	0.0483068	-0.255965	0.477	0.553	1
Fth1	0.0571074	0.257932	0.912	0.888	1
Slc1a3	0.0606036	0.317347	0.575	0.564	1
Rgs9	0.0617841	-0.321004	0.488	0.531	1
Sema6a	0.0623231	-0.271163	0.495	0.603	1
Ppp1r16b	0.135017	0.251229	0.498	0.469	1
Naaladl2	0.251081	0.263435	0.768	0.793	1
9630013A20Rik	0.352173	-0.324278	0.361	0.318	1
Cacnb2	0.932752	-0.269827	0.73	0.665	1

## Sheet: thiamine_cluster8R61thiaminevsN
Column1	p_val	avg_log2FC	pct.1	pct.2	p_val_adj
Cmss1	2.02905e-24	-0.907829	0.994	1	5.16009e-20
Gm42418	1.85381e-12	-0.489606	1	1	4.71444e-08
Penk	8.13922e-11	-0.864722	0.307	0.573	2.06989e-06
Pcp4	7.78146e-10	-0.59175	0.908	0.974	1.9789e-05
AY036118	6.30052e-08	-0.426316	1	1	0.00160229
Ssh2	1.15504e-07	-0.522711	0.988	0.996	0.00293739
Cdk8	1.09153e-06	-0.43074	0.926	0.97	0.0277587
Thrap3	1.18943e-06	0.525694	0.454	0.237	0.0302485
Lsamp	2.86511e-06	0.649481	0.982	0.978	0.0728625
Luc7l2	3.46904e-06	0.345439	1	0.996	0.0882212
Mgat4c	7.72515e-06	0.537169	0.945	0.892	0.196458
Nrgn	1.01219e-05	-0.373897	0.914	0.974	0.257409
Calm2	1.11201e-05	-0.399227	0.975	0.991	0.282796
Meg3	1.11405e-05	0.785223	0.982	0.987	0.283315
Polr2a	1.59262e-05	0.310871	0.276	0.103	0.405018
Zc3h6	3.41017e-05	0.315977	0.374	0.181	0.86724
Dlg2	3.81832e-05	0.405186	0.994	1	0.971038
Pcdh9	5.85241e-05	0.371581	0.994	0.991	1
Cadm2	6.6679e-05	0.491826	1	0.991	1
Arpp21	0.000133517	-0.35854	0.957	0.996	1
Naa20	0.00013769	0.388959	0.368	0.203	1
Ctnna2	0.000196133	0.425215	0.994	0.978	1
Nr3c2	0.000202975	0.307109	0.914	0.866	1
Rgs2	0.000207102	-0.343706	0.264	0.44	1
Ccnd3	0.000219777	-0.400549	0.35	0.522	1
H2-K1	0.000232868	0.388437	0.423	0.25	1
Tmsb4x	0.000240209	-0.358262	0.963	0.987	1
Ppp2r2b	0.000285439	0.27331	0.945	0.897	1
Anxa3	0.000290654	0.34113	0.718	0.573	1
Pag1	0.000301826	-0.298365	0.81	0.884	1
Il6st	0.000306534	0.326389	0.571	0.388	1
Ckb	0.000309103	-0.398687	0.975	0.996	1
Arhgap17	0.000327854	-0.367527	0.558	0.694	1
Lrrc7	0.000337242	0.335728	0.963	0.966	1
Ralyl	0.000355236	0.350615	0.92	0.905	1
Sox4	0.000414577	0.331049	0.258	0.121	1
A230006K03Rik	0.000501961	0.310057	0.883	0.849	1
Fry	0.000542525	0.338333	0.963	0.927	1
Rplp1	0.000642981	-0.429833	0.472	0.599	1
Gng2	0.000643418	-0.300255	0.319	0.491	1
Sgcz	0.000669273	0.529717	0.969	0.957	1
Dapp1	0.00070871	-0.391712	0.399	0.547	1
Grid2	0.000712056	0.442266	0.988	0.983	1
Syp	0.000713697	0.319428	0.27	0.138	1
Lrrc4c	0.000759734	0.472364	0.994	0.991	1
Arhgap22	0.000818023	-0.33194	0.399	0.547	1
Rian	0.000849058	0.345348	0.92	0.914	1
Dgkd	0.000953599	0.320491	0.712	0.612	1
Hpgd	0.000964355	-0.416142	0.454	0.595	1
Camk1d	0.00117014	-0.306529	1	0.996	1
Slc12a6	0.00123076	-0.332353	0.81	0.832	1
Rin2	0.00139522	0.377837	0.485	0.328	1
Tmem117	0.00155589	0.292022	0.288	0.164	1
Lrig2	0.00163113	0.325482	0.301	0.172	1
Copg2	0.00169457	0.322008	0.515	0.349	1
Tenm2	0.00216497	0.422975	0.969	0.935	1
Fam155a	0.00216529	0.45909	0.92	0.892	1
Nova1	0.00223774	0.269526	0.282	0.155	1
Kcnip4	0.00248826	0.315029	0.969	0.961	1
Idh3b	0.00250709	0.295506	0.27	0.147	1
Atp1a1	0.0025275	-0.277443	0.153	0.28	1
Cdr1os	0.00252756	0.271028	0.92	0.909	1
Homer1	0.00254993	-0.32113	0.681	0.759	1
Hsp90ab1	0.00256434	-0.323452	0.933	0.974	1
Slc25a3	0.00279437	0.255597	0.828	0.789	1
Calm1	0.00283602	-0.304569	0.969	0.996	1
0610040J01Rik	0.00294741	-0.318817	0.564	0.672	1
Lhfpl3	0.00316844	0.351222	0.877	0.866	1
Bcl2l1	0.00319378	0.338861	0.436	0.302	1
Snhg14	0.00367308	0.333275	0.92	0.935	1
Erbin	0.00368729	-0.291075	0.681	0.802	1
Sgce	0.00375128	0.271502	0.393	0.25	1
Gm48678	0.00378098	-0.28954	0.577	0.664	1
Hck	0.00380415	0.326578	0.509	0.379	1
Il1rapl1	0.00413181	0.350385	1	0.991	1
Immt	0.00416842	0.258153	0.319	0.198	1
Gm40841	0.00432368	0.277137	0.436	0.293	1
Cdh18	0.00434856	0.374216	0.896	0.871	1
Lingo2	0.00445951	0.448069	0.877	0.879	1
Atp6v0c	0.004633	0.258557	0.963	0.978	1
Agk	0.00464777	0.251035	0.258	0.142	1
Tank	0.00475663	0.256196	0.319	0.198	1
Nlgn1	0.00493487	0.470936	1	0.987	1
Lztfl1	0.00507846	0.25701	0.258	0.147	1
Atp6ap2	0.0052298	0.289686	0.356	0.228	1
Atp2b1	0.00543895	-0.251884	0.988	0.983	1
Ppp1r1b	0.00560102	-0.267276	0.178	0.293	1
Lgmn	0.00566981	0.332816	0.859	0.802	1
Mapk14	0.00577326	-0.312183	0.472	0.586	1
Zfp799	0.00581824	0.289231	0.282	0.172	1
Cd180	0.00602136	0.343542	0.546	0.431	1
Pdlim5	0.00606638	0.306	0.288	0.177	1
Papola	0.00637831	0.254813	0.804	0.707	1
Rcsd1	0.00646178	-0.275787	0.258	0.379	1
Setd2	0.00647934	-0.275508	0.319	0.444	1
Ndufb3	0.00655561	-0.299018	0.196	0.315	1
5330438D12Rik	0.00680022	-0.297505	0.982	0.983	1
Rims2	0.00684084	0.270426	0.969	0.931	1
Usp3	0.00686047	0.314341	0.38	0.263	1
Elp4	0.00710081	0.31439	0.429	0.302	1
Lrch1	0.00737809	-0.252587	0.699	0.81	1
Astn2	0.00818763	0.258709	0.417	0.297	1
Naa35	0.00827291	0.278801	0.387	0.263	1
Gpr88	0.00870196	-0.357264	0.172	0.272	1
Trafd1	0.00886204	0.294619	0.374	0.263	1
Glul	0.00901289	-0.339314	0.344	0.435	1
Ly6e	0.00908059	0.273055	0.583	0.431	1
Csmd1	0.00923976	0.436289	0.982	0.957	1
Metap1d	0.00928342	0.333633	0.344	0.237	1
0610030E20Rik	0.00948216	0.257306	0.344	0.224	1
Mrps5	0.00982043	0.280434	0.252	0.151	1
Vav1	0.00988799	-0.323103	0.264	0.362	1
Fgf14	0.0099622	0.357897	0.982	0.957	1
Ppip5k2	0.0101091	0.252308	0.313	0.207	1
Anks1b	0.010425	0.270608	0.994	0.987	1
Tnpo1	0.0104645	0.305627	0.626	0.504	1
Ndufa13	0.0104912	-0.267422	0.264	0.384	1
Magi2	0.0109875	0.267818	1	1	1
Rhoq	0.012444	-0.264266	0.301	0.409	1
Hpca	0.0126617	-0.259283	0.19	0.297	1
Ccser1	0.0128457	0.300535	0.975	0.944	1
Sorcs1	0.0130184	0.267563	0.945	0.948	1
A930015D03Rik	0.0130384	0.267848	0.313	0.207	1
Cerk	0.013339	-0.263337	0.417	0.517	1
Abca9	0.013355	-0.260989	0.534	0.612	1
Adap2	0.0133609	-0.263659	0.638	0.685	1
Nrxn3	0.0139665	0.429363	0.963	0.974	1
Dgkz	0.0142954	-0.343295	0.178	0.267	1
Slc1a3	0.0143149	0.278589	0.38	0.267	1
Dnaja1	0.0144022	-0.268866	0.239	0.349	1
Macrod2	0.0145961	0.271415	0.982	0.974	1
Gm16337	0.0148752	-0.323248	0.337	0.418	1
Saraf	0.0155789	0.255336	0.362	0.246	1
Ptgds	0.0158451	-1.30592	0.626	0.75	1
Hnrnpc	0.0163092	-0.286389	0.405	0.509	1
Sdk1	0.0163285	0.333002	0.368	0.272	1
Lrp1b	0.0165545	0.344854	0.994	1	1
Snhg11	0.01673	0.504054	0.994	0.97	1
Lrrtm4	0.0174481	0.380451	0.957	0.944	1
Nrg3	0.0191217	0.306161	0.939	0.927	1
Adgrl3	0.0191954	0.288593	0.963	0.953	1
Nkain2	0.0196879	0.26519	1	1	1
Lgals9	0.0212031	0.255349	0.411	0.306	1
Pcsk1n	0.0230644	0.273691	0.926	0.94	1
Atp5l	0.0231601	-0.272107	0.178	0.267	1
Robo1	0.0236683	0.336138	0.933	0.944	1
Arhgap39	0.0245966	-0.272357	0.589	0.634	1
Impact	0.0256345	0.264008	0.472	0.371	1
Sesn1	0.0258053	-0.258301	0.423	0.53	1
Pcdh7	0.0261637	0.268245	0.92	0.905	1
Lrmda	0.027216	0.31786	0.883	0.841	1
Stat5b	0.0274179	0.256572	0.368	0.259	1
Lrfn5	0.0282464	0.2648	0.926	0.922	1
Ate1	0.0283464	0.274788	0.294	0.211	1
Pik3r5	0.0341371	-0.259703	0.215	0.297	1
Dcc	0.0349861	0.310866	0.969	0.961	1
Nrxn1	0.0358364	0.356947	0.988	0.961	1
Rps20	0.0369565	0.266139	0.356	0.276	1
3222401L13Rik	0.0381569	-0.264239	0.245	0.323	1
Ncoa3	0.0387528	-0.25468	0.399	0.487	1
Abcd2	0.0409001	-0.273855	0.239	0.319	1
Kcnd2	0.0444588	0.292567	0.988	0.966	1
Lars2	0.0491998	-0.312193	0.319	0.384	1
Ctsz	0.0507314	0.31526	0.595	0.539	1
Dynll1	0.0514899	-0.291341	0.313	0.397	1
Bank1	0.0522979	0.256487	0.38	0.293	1
Dgki	0.0557328	0.268915	0.975	0.974	1
Cdh8	0.0558649	0.281705	0.865	0.879	1
Oaz1	0.0565995	-0.258692	0.675	0.698	1
Mark2	0.0673042	-0.289571	0.546	0.595	1
Gapvd1	0.0677399	-0.251636	0.436	0.47	1
Pex5l	0.0751091	-0.257548	0.859	0.931	1
Ntm	0.0824363	0.44371	0.957	0.927	1
Sparc	0.0829492	0.324413	0.613	0.552	1
Sik2	0.0906105	-0.272816	0.368	0.422	1
4930517O19Rik	0.0933516	-0.295534	0.245	0.302	1
Ctnnd2	0.0978928	0.251813	0.988	0.966	1
Plp1	0.106636	-0.465272	0.853	0.935	1
Adgrb3	0.112117	0.268349	0.988	0.97	1
Cebpz	0.113657	-0.27632	0.374	0.418	1
Cd68	0.115793	0.252016	0.38	0.31	1
Rora	0.121817	0.256414	0.969	0.961	1
Pde10a	0.155867	-0.255303	0.951	0.97	1
Gabrg3	0.20779	0.28405	0.92	0.927	1
Nrg1	0.228852	0.322074	0.963	0.966	1
Dbi	0.273759	-0.292296	0.221	0.263	1
Dpp10	0.436695	0.433365	0.896	0.905	1
Ptprt	0.460221	0.263179	0.577	0.582	1

## Sheet: thiamine_cluster9R61thiaminevsN
Column1	p_val	avg_log2FC	pct.1	pct.2	p_val_adj
Nos1ap	3.66025e-35	-0.882137	0.945	0.992	9.30837e-31
AC149090.1	1.8582e-29	-0.876971	0.807	0.981	4.7256e-25
Dcc	2.58569e-28	1.11878	0.917	0.724	6.57567e-24
Etv5	1.55481e-24	-0.786767	0.486	0.816	3.95404e-20
Klf10	2.75486e-23	-0.705396	0.286	0.663	7.00589e-19
Malat1	4.08782e-23	-0.310934	1	1	1.03957e-18
Junb	2.71361e-22	-1.20915	0.172	0.556	6.90098e-18
Ogt	4.13973e-22	0.589793	0.948	0.789	1.05278e-17
Cntn5	4.2875e-22	0.77868	0.934	0.609	1.09035e-17
Opcml	7.84402e-22	0.665503	1	1	1.99481e-17
Thsd7b	9.06063e-21	-0.830792	0.821	0.946	2.30421e-16
Arc	1.44214e-20	-0.843454	0.093	0.425	3.66751e-16
Epha7	1.98174e-20	0.727611	0.897	0.663	5.03978e-16
Cmss1	2.0381e-20	-0.619237	0.972	0.992	5.1831e-16
1700016P03Rik	4.925e-20	-0.903104	0.097	0.429	1.25248e-15
Rbm28	5.30217e-20	0.588306	0.793	0.479	1.34839e-15
Cdh9	5.40782e-20	1.13373	0.659	0.337	1.37526e-15
Khdrbs3	3.20944e-18	-0.482393	0.99	0.996	8.16192e-14
Slc17a7	3.57821e-18	-0.494565	0.934	0.989	9.09975e-14
Meg3	5.12574e-17	0.332332	1	1	1.30353e-12
Homer1	8.68509e-17	-1.11854	0.738	0.835	2.20871e-12
Arhgap25	6.24546e-16	-0.48375	0.321	0.655	1.58828e-11
Sdk2	1.2974e-15	-0.57316	0.838	0.946	3.29942e-11
Itpka	1.86625e-15	-0.481396	0.179	0.479	4.74605e-11
Egr1	1.87066e-15	-0.635819	0.238	0.54	4.75727e-11
Srsf11	4.96846e-15	0.427767	0.976	0.939	1.26353e-10
Fam189a1	1.79332e-14	-0.589433	0.786	0.881	4.56058e-10
Atad2b	1.80835e-14	0.474463	0.762	0.483	4.59881e-10
Mir99ahg	3.01884e-14	0.584963	0.897	0.801	7.6772e-10
Nrp1	4.31043e-14	-0.625661	0.603	0.805	1.09618e-09
Rbm39	5.91321e-14	0.350771	0.997	0.996	1.50379e-09
Cdr1os	6.18178e-14	0.414967	0.983	0.927	1.57209e-09
Ncald	6.50695e-14	-0.473067	0.966	0.977	1.65478e-09
Per1	9.52189e-14	-0.427048	0.093	0.349	2.42151e-09
5330417C22Rik	1.26833e-13	-0.466818	0.472	0.736	3.22549e-09
Pde1a	3.31138e-13	-0.481046	0.983	0.985	8.42116e-09
Ier5l	3.72168e-13	-0.388237	0.114	0.375	9.46461e-09
Vxn	4.64168e-13	-0.425184	0.703	0.866	1.18043e-08
Cadm2	5.13649e-13	0.380945	1	0.996	1.30626e-08
Pdzrn4	5.34986e-13	0.653629	0.952	0.874	1.36052e-08
Tox	7.66535e-13	0.780093	0.69	0.433	1.94938e-08
Rbm26	8.04016e-13	0.425114	0.955	0.904	2.04469e-08
Grid2	1.1977e-12	0.76504	0.876	0.678	3.04588e-08
Etl4	1.99979e-12	-0.398507	1	1	5.08566e-08
Ankrd33b	7.38055e-12	-0.557797	0.538	0.736	1.87695e-07
Fut9	8.38397e-12	-0.392246	0.986	0.996	2.13213e-07
Cnksr3	1.37801e-11	-0.3633	0.086	0.31	3.50441e-07
Pde4a	1.48587e-11	-0.444017	0.645	0.805	3.77871e-07
Ccnl2	1.83891e-11	0.439008	0.769	0.609	4.67654e-07
Spred1	1.95576e-11	-0.406457	0.603	0.782	4.9737e-07
Cdh10	2.24921e-11	0.475435	0.838	0.536	5.71995e-07
Per3	2.35144e-11	-0.431193	0.228	0.483	5.97994e-07
Dusp1	2.50518e-11	-0.369689	0.055	0.257	6.37092e-07
Nlgn1	2.84745e-11	0.406751	1	1	7.24135e-07
Onecut2	2.94738e-11	0.370224	0.283	0.065	7.49547e-07
Mir670hg	2.99271e-11	-0.475579	0.159	0.406	7.61075e-07
Btg2	3.48055e-11	-0.501153	0.145	0.379	8.8514e-07
Slc24a3	4.39733e-11	0.486089	0.362	0.123	1.11828e-06
Slc35f4	5.28245e-11	-0.485726	0.855	0.935	1.34338e-06
Arap2	5.60076e-11	-0.392564	0.793	0.904	1.42433e-06
Sema4a	6.13746e-11	-0.410737	0.283	0.54	1.56082e-06
Inf2	9.56753e-11	-0.433549	0.321	0.571	2.43312e-06
Fam131a	1.14918e-10	-0.438836	0.545	0.72	2.92247e-06
AI480526	1.21476e-10	0.348151	0.59	0.314	3.08925e-06
Spred2	1.35482e-10	-0.430262	0.638	0.831	3.44544e-06
Sgcz	1.61327e-10	0.533571	0.997	0.958	4.10271e-06
Ctxn1	1.80413e-10	-0.406187	0.403	0.636	4.58808e-06
Fstl5	2.00977e-10	0.501151	0.479	0.226	5.11105e-06
Limk1	2.10971e-10	-0.374925	0.293	0.548	5.3652e-06
Slc35f3	2.11965e-10	-0.408548	0.79	0.904	5.39047e-06
Sox5	2.17547e-10	0.446995	0.983	0.946	5.53244e-06
Cacna1b	2.83776e-10	0.390741	0.786	0.536	7.21672e-06
Dbp	2.88911e-10	-0.272857	0.066	0.261	7.3473e-06
Efhd2	3.30913e-10	-0.3629	0.39	0.648	8.41545e-06
Rprml	3.46416e-10	-0.406817	0.572	0.766	8.80971e-06
Rspo2	4.45226e-10	-0.575603	0.193	0.421	1.13226e-05
Lrp1b	4.71624e-10	0.33127	1	0.992	1.19939e-05
P4ha1	5.45683e-10	-0.446407	0.514	0.732	1.38773e-05
Cck	5.95718e-10	0.63997	0.624	0.398	1.51497e-05
Bckdhb	6.39027e-10	0.379121	0.555	0.307	1.62511e-05
Epha5	6.6687e-10	0.448671	0.976	0.92	1.69592e-05
Cpa6	7.40701e-10	0.814925	0.403	0.188	1.88368e-05
Rhobtb2	7.41625e-10	-0.41889	0.245	0.475	1.88603e-05
Kcnip3	7.49194e-10	-0.53781	0.662	0.808	1.90528e-05
Lrrc4c	7.59816e-10	0.482529	0.966	0.916	1.93229e-05
Gm15738	1.05366e-09	-0.370787	0.672	0.843	2.67955e-05
Sox5os4	1.05862e-09	0.349657	0.331	0.115	2.69217e-05
AY036118	1.14248e-09	-0.350915	0.969	0.992	2.90545e-05
Cacna2d1	1.18404e-09	0.36367	0.986	0.977	3.01114e-05
Gas5	1.27544e-09	0.422735	0.734	0.586	3.24358e-05
Luc7l2	1.33494e-09	0.278323	0.993	0.989	3.39488e-05
Mmp17	1.42416e-09	-0.399404	0.386	0.617	3.62177e-05
Kcnh3	1.81242e-09	-0.31062	0.252	0.49	4.60916e-05
Grik2	1.8865e-09	0.365806	0.986	0.962	4.79756e-05
Pcp4	1.90039e-09	-0.468592	0.724	0.874	4.83287e-05
Fgf12	1.96824e-09	0.261358	1	1	5.00543e-05
Sema6d	2.13852e-09	0.518986	0.893	0.851	5.43848e-05
Dpy19l3	2.83687e-09	-0.341946	0.138	0.349	7.21444e-05
Madd	2.94814e-09	-0.405334	0.607	0.755	7.49742e-05
Cntnap5a	3.00066e-09	0.51741	0.407	0.18	7.63099e-05
Gpatch8	3.00326e-09	0.304529	0.962	0.943	7.6376e-05
Kcnip4	3.11163e-09	0.417609	0.99	0.889	7.91318e-05
Stk3	3.12507e-09	0.405775	0.572	0.356	7.94736e-05
Rian	3.24727e-09	0.321647	0.986	0.989	8.25814e-05
Oprm1	3.33897e-09	-0.391452	0.89	0.931	8.49133e-05
Scg3	3.48764e-09	-0.464262	0.534	0.705	8.86943e-05
Kcnc4	3.62496e-09	-0.277888	0.159	0.379	9.21864e-05
Dennd1a	3.84283e-09	0.306776	0.952	0.9	9.7727e-05
Hnrnpll	5.04239e-09	-0.361099	0.569	0.762	0.000128233
1700085D07Rik	5.13247e-09	-0.353348	0.379	0.613	0.000130524
Paxbp1	5.25366e-09	0.335169	0.859	0.743	0.000133606
Penk	5.31915e-09	-0.421093	0.076	0.257	0.000135271
Olfm1	5.33029e-09	-0.400724	0.862	0.943	0.000135555
Tfrc	5.56562e-09	0.322677	0.6	0.349	0.000141539
Gm16105	5.95334e-09	-0.309186	0.366	0.613	0.000151399
Hjurp	7.93303e-09	0.337984	0.562	0.326	0.000201745
Clasp2	8.33088e-09	0.305679	0.966	0.835	0.000211862
Cyp51	8.51791e-09	-0.328733	0.266	0.487	0.000216619
Csmd3	9.34737e-09	0.370641	1	0.977	0.000237713
Rab28	9.86104e-09	0.36293	0.638	0.406	0.000250776
Sema3a	1.1167e-08	0.411898	0.534	0.307	0.000283987
Igsf9b	1.1177e-08	-0.412417	0.579	0.732	0.000284241
C130071C03Rik	1.26099e-08	0.345313	0.886	0.805	0.000320682
Gm47423	1.26389e-08	-0.545014	0.303	0.513	0.000321421
Coq10b	1.48343e-08	-0.355637	0.252	0.475	0.000377251
H3f3b	1.49172e-08	0.328566	0.659	0.429	0.00037936
Ppfia2	1.49707e-08	0.335649	0.934	0.862	0.000380721
Sec14l1	1.50522e-08	-0.338298	0.259	0.471	0.000382793
Tacc1	1.6109e-08	-0.361029	0.852	0.893	0.000409667
Klhl1	1.69724e-08	0.346116	0.283	0.096	0.000431626
4930402H24Rik	1.72944e-08	0.308395	0.941	0.874	0.000439814
Pcdh11x	2.11521e-08	0.456503	0.697	0.49	0.000537918
Kcnc2	2.24138e-08	0.456737	0.352	0.146	0.000570005
Setbp1	2.27588e-08	0.367287	0.924	0.843	0.000578778
Cdh6	2.31876e-08	-0.413767	0.493	0.713	0.000589684
Taf15	2.53646e-08	0.375474	0.81	0.625	0.000645047
Aifm3	2.58547e-08	-0.313754	0.19	0.402	0.00065751
Chuk	2.63241e-08	0.321694	0.776	0.625	0.000669448
Epha3	2.67072e-08	0.475001	0.655	0.437	0.000679191
Ptma	2.69018e-08	-0.349574	0.317	0.533	0.00068414
Gm28905	2.72553e-08	-0.50867	0.393	0.628	0.00069313
Npas4	3.08136e-08	-0.461786	0.11	0.299	0.00078362
Tmem178	3.19372e-08	-0.450848	0.845	0.908	0.000812195
Gpm6b	3.58877e-08	0.350056	0.962	0.927	0.00091266
A330102I10Rik	3.64246e-08	0.404923	0.624	0.418	0.000926313
Sntg1	3.91905e-08	0.429728	0.914	0.766	0.000996652
Satb1	3.99154e-08	0.4123	0.628	0.402	0.00101509
Grip1	4.12529e-08	0.425714	0.921	0.805	0.0010491
Luc7l3	4.25121e-08	0.342762	0.934	0.862	0.00108113
Gpr158	4.28832e-08	-0.344988	0.931	0.931	0.00109056
Gabra2	4.58979e-08	0.389598	0.459	0.249	0.00116723
Col5a1	4.79135e-08	-0.394615	0.303	0.51	0.00121849
Mast3	4.86644e-08	-0.418741	0.276	0.475	0.00123758
Gng2	4.92218e-08	-0.338082	0.538	0.755	0.00125176
Ddx5	5.07534e-08	0.331297	0.966	0.958	0.00129071
Gmds	5.54573e-08	0.380528	0.755	0.552	0.00141033
4930447C04Rik	5.92595e-08	0.449155	0.703	0.536	0.00150703
Tub	5.98455e-08	-0.301332	0.521	0.709	0.00152193
Lrfn5	6.30556e-08	0.365985	0.99	0.946	0.00160357
Cep164	6.97588e-08	0.325008	0.614	0.398	0.00177404
Dkk3	7.15351e-08	-0.397369	0.545	0.728	0.00181921
Gramd2	7.8246e-08	-0.278601	0.152	0.345	0.00198987
Ptprk	7.84367e-08	0.418313	0.259	0.084	0.00199472
Ntrk2	7.90899e-08	-0.366911	0.972	0.973	0.00201134
Rasal1	8.54953e-08	-0.339936	0.441	0.64	0.00217423
Eef1a1	8.99702e-08	0.355758	0.724	0.506	0.00228803
Jup	9.20413e-08	-0.263696	0.107	0.284	0.0023407
Dhx36	9.52126e-08	0.310596	0.731	0.536	0.00242135
Cask	9.79634e-08	0.350932	0.845	0.701	0.00249131
Dok6	9.83913e-08	0.296427	0.966	0.946	0.00250219
Nr4a1	1.05815e-07	-0.446348	0.39	0.567	0.00269098
Galnt13	1.08867e-07	0.360793	0.883	0.739	0.0027686
Syn3	1.09801e-07	0.320342	0.503	0.287	0.00279235
Cntnap4	1.12233e-07	-0.553805	0.486	0.67	0.00285419
Mrpl41	1.16894e-07	-0.327003	0.472	0.659	0.00297273
Camkv	1.22749e-07	-0.441269	0.562	0.693	0.00312163
Tiam2	1.31632e-07	0.375093	0.586	0.379	0.00334754
Zmynd8	1.39096e-07	-0.348513	0.766	0.881	0.00353735
Sfmbt2	1.42179e-07	0.312182	0.324	0.138	0.00361574
Tmem178b	1.47031e-07	0.411076	0.762	0.559	0.00373914
Mblac2	1.65586e-07	0.283694	0.362	0.165	0.00421102
Sh3bp5	1.77246e-07	-0.317457	0.31	0.513	0.00450755
Glp2r	1.9597e-07	-0.290865	0.279	0.487	0.00498372
Serinc2	2.0663e-07	-0.360736	0.248	0.444	0.0052548
Rgs11	2.09841e-07	-0.299869	0.431	0.64	0.00533647
Evl	2.23376e-07	0.320547	0.641	0.441	0.00568066
Il17ra	2.25938e-07	-0.289862	0.238	0.444	0.00574583
Usp46	2.39043e-07	-0.358227	0.859	0.916	0.0060791
Spata7	2.70185e-07	0.313023	0.741	0.556	0.00687106
Spock1	2.80479e-07	0.2679	0.99	0.985	0.00713286
Ext1	3.11703e-07	-0.254105	0.986	0.992	0.00792692
Tef	3.29114e-07	-0.349853	0.355	0.533	0.0083697
4930415C11Rik	3.41214e-07	-0.434781	0.555	0.697	0.00867741
Ckb	3.46696e-07	-0.370118	0.721	0.858	0.00881682
Ano4	3.57992e-07	0.426736	0.81	0.759	0.00910409
Mir124-2hg	3.73015e-07	0.302823	0.872	0.697	0.00948616
Bbx	4.0101e-07	0.297199	0.597	0.383	0.0101981
Ddx17	4.34209e-07	0.294896	0.783	0.605	0.0110424
Gm48749	4.5395e-07	-0.287709	0.193	0.387	0.0115444
Baiap2	4.96538e-07	-0.339301	0.693	0.828	0.0126275
Cdh8	5.17236e-07	0.291478	0.345	0.157	0.0131538
Scaper	5.66672e-07	0.286473	0.824	0.728	0.014411
Kcnj6	5.81825e-07	-0.334573	0.831	0.923	0.0147964
Ptms	6.86837e-07	-0.314333	0.559	0.724	0.0174669
Adora1	6.95472e-07	-0.286545	0.3	0.51	0.0176865
Sh3rf3	6.9693e-07	-0.357773	0.817	0.897	0.0177236
Mef2d	7.05737e-07	-0.309904	0.359	0.552	0.0179476
Nr4a2	7.70556e-07	-0.552431	0.21	0.391	0.019596
Nhsl2	7.71736e-07	-0.353931	0.672	0.797	0.019626
Slc25a42	8.24265e-07	-0.312468	0.338	0.525	0.0209619
Shb	9.42261e-07	-0.274105	0.197	0.379	0.0239627
Tmem132a	9.61611e-07	-0.329079	0.593	0.739	0.0244547
Sphkap	9.67555e-07	0.425795	0.624	0.441	0.0246059
Prune2	9.73041e-07	0.276402	0.555	0.356	0.0247454
Prkg1	1.05103e-06	0.349283	0.903	0.808	0.0267287
Skap2	1.07975e-06	0.269888	0.359	0.176	0.027459
Rai14	1.13775e-06	-0.391129	0.662	0.805	0.0289341
Cx3cl1	1.14496e-06	-0.376342	0.552	0.701	0.0291176
Mrtfb	1.2121e-06	-0.276394	0.934	0.985	0.0308249
Wwc1	1.26242e-06	-0.380627	0.307	0.475	0.0321047
Ei24	1.33076e-06	0.28212	0.659	0.475	0.0338425
Necab3	1.37282e-06	-0.349719	0.521	0.682	0.0349123
Nwd2	1.46055e-06	-0.350709	0.228	0.414	0.0371434
Tmod1	1.47764e-06	-0.338314	0.383	0.548	0.0375779
Ina	1.5037e-06	-0.437327	0.431	0.625	0.0382405
Ogfrl1	1.60554e-06	-0.309544	0.51	0.674	0.0408305
Zfp804a	1.60999e-06	0.423633	0.714	0.582	0.0409436
Epb41	1.69712e-06	-0.335145	0.421	0.617	0.0431595
Cdh2	1.84242e-06	-0.269376	0.962	0.977	0.0468545
Gm42418	1.85736e-06	-0.297042	1	1	0.0472345
Ptk7	1.86475e-06	-0.334955	0.3	0.467	0.0474226
Dlg4	2.03867e-06	-0.267237	0.469	0.644	0.0518454
Adcy9	2.07125e-06	-0.304706	0.672	0.766	0.0526738
Polb	2.2773e-06	0.341812	0.724	0.582	0.057914
Fgd4	2.27759e-06	0.282018	0.683	0.494	0.0579213
Vwa8	2.29082e-06	0.300765	0.645	0.467	0.0582578
Cep112	2.38906e-06	0.487036	0.441	0.268	0.0607561
Selenom	2.42856e-06	0.297724	0.441	0.261	0.0617608
Zmym4	2.52405e-06	0.282934	0.797	0.625	0.0641892
Gpi1	2.63206e-06	0.303414	0.697	0.54	0.0669358
Fat3	2.78881e-06	0.425936	0.824	0.709	0.0709222
Rell1	2.79275e-06	-0.337559	0.424	0.602	0.0710224
Nxph3	3.07954e-06	-0.255667	0.186	0.356	0.0783158
Hpcal4	3.1051e-06	-0.281584	0.362	0.54	0.0789658
Tia1	3.37686e-06	0.271289	0.848	0.755	0.085877
Arl5b	3.41266e-06	-0.291728	0.193	0.364	0.0867873
Rps6ka2	3.4161e-06	-0.271742	0.345	0.54	0.0868748
Ccdc85a	3.60255e-06	0.378778	0.562	0.387	0.0916165
Agrp	3.82429e-06	-0.286389	0.255	0.437	0.0972556
Nr3c2	4.34279e-06	0.327909	0.397	0.23	0.110442
Dgkg	4.43446e-06	-0.387958	0.472	0.609	0.112773
Wdfy3	4.67466e-06	0.286473	0.824	0.713	0.118881
Srgap3	5.06517e-06	0.313795	0.448	0.272	0.128812
Sulf1	5.58673e-06	-0.392658	0.51	0.67	0.142076
Rps6ka3	5.73443e-06	0.301215	0.783	0.667	0.145832
Lrba	5.98653e-06	0.255257	0.81	0.705	0.152243
Mir124a-1hg	6.18169e-06	-0.268588	0.748	0.847	0.157207
Astn2	6.47836e-06	0.29529	0.941	0.935	0.164751
Rock2	6.57768e-06	-0.285123	0.852	0.904	0.167277
Klf9	6.82364e-06	-0.271027	0.521	0.674	0.173532
Macrod1	6.83665e-06	-0.286488	0.555	0.705	0.173863
Arhgef3	6.88676e-06	-0.281045	0.514	0.69	0.175137
Tmem108	7.16511e-06	0.469604	0.634	0.452	0.182216
Plekhg5	7.89337e-06	-0.309642	0.531	0.705	0.200736
Kifap3	8.0672e-06	0.255421	0.931	0.874	0.205157
Nyap2	8.13913e-06	0.371765	0.786	0.667	0.206986
Cpe	8.63049e-06	-0.296049	0.89	0.962	0.219482
Grm3	8.76605e-06	-0.336525	0.917	0.962	0.222929
Khsrp	8.77242e-06	-0.261628	0.293	0.46	0.223091
Galnt9	8.95025e-06	-0.321661	0.686	0.805	0.227614
Auts2	9.34394e-06	0.294513	0.955	0.897	0.237626
Col23a1	1.05699e-05	-0.559346	0.266	0.418	0.268802
Trip12	1.06516e-05	0.277575	0.838	0.759	0.27088
Brdt	1.0744e-05	-0.250856	0.348	0.533	0.27323
Tet3	1.10211e-05	-0.30248	0.476	0.613	0.280277
Pde8b	1.14709e-05	-0.343964	0.5	0.64	0.291718
Sema5b	1.16123e-05	-0.356073	0.476	0.644	0.295312
Spock2	1.20872e-05	-0.308688	0.572	0.682	0.30739
Ddx39b	1.25174e-05	0.275768	0.624	0.464	0.318329
Epha6	1.26895e-05	0.474243	0.286	0.138	0.322706
Frmd6	1.29116e-05	-0.324143	0.348	0.513	0.328354
Tmem165	1.40985e-05	0.267222	0.662	0.51	0.358538
Adcy1	1.46476e-05	-0.276402	0.766	0.885	0.372502
Enox1	1.4992e-05	0.306307	0.648	0.483	0.381263
Mgll	1.54985e-05	-0.264531	0.741	0.851	0.394143
Zfp804b	1.6478e-05	0.421099	0.531	0.345	0.419052
Atp2b4	1.66428e-05	-0.266846	0.707	0.851	0.423244
Sgk3	1.67686e-05	-0.28527	0.372	0.536	0.426442
Atxn7l1	1.90301e-05	0.260721	0.693	0.54	0.483955
Sptbn2	1.92731e-05	-0.25172	0.586	0.724	0.490133
Jcad	1.97892e-05	-0.282934	0.334	0.49	0.50326
Ccdc88a	2.02393e-05	0.258519	0.872	0.843	0.514706
Bsn	2.04665e-05	-0.293047	0.61	0.724	0.520483
Frmd4a	2.05769e-05	0.314466	0.99	0.985	0.523292
Spon1	2.07506e-05	-0.445338	0.372	0.513	0.527709
Man2a1	2.09431e-05	-0.315208	0.517	0.651	0.532604
Fndc9	2.13347e-05	-0.322817	0.607	0.69	0.542564
Btbd9	2.15753e-05	-0.345919	0.734	0.816	0.548681
Ttc9b	2.20646e-05	-0.272633	0.524	0.69	0.561124
Tubb2a	2.39146e-05	0.295054	0.686	0.544	0.608172
Reep1	2.39376e-05	-0.284154	0.783	0.851	0.608756
Adarb2	2.43111e-05	0.389537	0.31	0.172	0.618255
Pogz	2.4978e-05	0.251353	0.51	0.341	0.635215
Klf12	2.54108e-05	0.264002	0.859	0.835	0.646222
Osbpl9	2.57826e-05	0.261591	0.924	0.881	0.655676
Wnk1	2.72801e-05	0.297169	0.662	0.529	0.693761
Pxdn	2.74609e-05	-0.263896	0.383	0.556	0.698359
Syt7	2.7681e-05	-0.280773	0.893	0.923	0.703954
Gucd1	2.82322e-05	-0.261937	0.138	0.28	0.717972
Map2k6	2.89622e-05	0.252572	0.438	0.276	0.736537
Zdhhc20	3.18917e-05	0.271045	0.638	0.494	0.811037
Mapkap1	3.25308e-05	0.269921	0.603	0.464	0.82729
Asap2	3.42411e-05	-0.288808	0.59	0.697	0.870787
Slc38a2	3.45898e-05	-0.310802	0.59	0.736	0.879652
Sh3rf1	3.4682e-05	-0.25848	0.452	0.609	0.881998
Kcnq1ot1	3.56023e-05	0.281433	0.938	0.866	0.905403
Hivep1	3.61851e-05	-0.302393	0.569	0.697	0.920224
Jakmip3	3.98567e-05	0.273018	0.634	0.494	1
Zfp385b	4.09182e-05	0.252702	0.945	0.916	1
Ranbp2	4.09767e-05	-0.282615	0.524	0.67	1
Gm17231	4.13433e-05	-0.315502	0.369	0.521	1
Trim9	4.2843e-05	-0.276997	0.879	0.916	1
Sik2	4.44968e-05	-0.287496	0.431	0.575	1
Atp5b	4.77738e-05	0.284363	0.669	0.544	1
Ptchd4	4.87826e-05	0.348369	0.469	0.31	1
Slc7a14	4.89808e-05	-0.283248	0.569	0.693	1
Hmgcs1	5.11085e-05	-0.260739	0.317	0.467	1
Scmh1	5.21382e-05	0.25806	0.814	0.724	1
Arid5b	5.37803e-05	0.332948	0.603	0.475	1
Atp6v0c	5.91717e-05	0.322027	0.924	0.916	1
Tspan5	6.12735e-05	0.303614	0.89	0.835	1
Mgat4c	6.21306e-05	0.39747	0.952	0.912	1
U2surp	6.26892e-05	0.259477	0.821	0.766	1
Bcl11b	6.57834e-05	-0.255343	0.603	0.762	1
Cdh18	6.76823e-05	0.26803	1	1	1
Gm45904	7.11385e-05	-0.260256	0.234	0.387	1
Bcl2	7.2824e-05	-0.332124	0.541	0.655	1
Wdr17	7.30941e-05	-0.373167	0.793	0.851	1
Sgcd	7.54597e-05	0.399596	0.614	0.475	1
Prkcg	8.12012e-05	-0.292747	0.593	0.701	1
Adk	8.34543e-05	0.302792	0.703	0.579	1
Pebp1	9.16101e-05	0.255609	0.69	0.598	1
Nav1	9.2321e-05	0.270072	0.51	0.345	1
Klf13	9.80933e-05	-0.253665	0.421	0.575	1
Atp5g1	0.000102565	0.309365	0.552	0.433	1
Tyro3	0.000104232	-0.252255	0.341	0.49	1
Mbnl2	0.00012763	-0.291518	0.817	0.9	1
Gigyf2	0.00013167	0.25478	0.686	0.59	1
Edil3	0.000139619	0.298658	0.469	0.31	1
Tcf12	0.000147588	0.269776	0.559	0.414	1
Kcnt2	0.000148055	0.33471	0.952	0.908	1
Rap1gap	0.000148564	-0.29098	0.428	0.556	1
Ccnd2	0.000150731	-0.333333	0.417	0.548	1
Tuba1a	0.000151746	0.297229	0.714	0.613	1
Pcsk1n	0.000151987	0.315444	0.793	0.72	1
Cd81	0.000153004	0.263034	0.517	0.375	1
Jam3	0.000153311	-0.320188	0.479	0.582	1
Scn1a	0.000153666	0.252133	0.831	0.732	1
Gria4	0.000172702	0.290515	0.903	0.874	1
Ak5	0.000175763	-0.252007	0.807	0.87	1
Gapdh	0.000180447	0.364675	0.79	0.762	1
Prkd1	0.000187092	-0.373432	0.317	0.433	1
Dynll1	0.000188455	-0.28496	0.562	0.697	1
Fmn1	0.000200384	-0.253655	0.838	0.885	1
Zfp950	0.000206989	0.251778	0.8	0.751	1
Itfg1	0.000208933	0.254264	0.693	0.625	1
Pid1	0.000213703	0.359825	0.617	0.479	1
Mpped1	0.000245042	-0.255027	0.766	0.828	1
Gtf3c1	0.000264131	-0.251348	0.545	0.663	1
Dlc1	0.000280427	-0.276543	0.962	0.985	1
Pip5k1a	0.000292006	-0.252084	0.572	0.69	1
Pcdh15	0.000297629	-0.374396	0.648	0.736	1
Hspa8	0.000303695	0.269249	0.8	0.716	1
Epha4	0.000326042	0.313775	0.538	0.421	1
Bcas3	0.000330347	0.267967	0.848	0.789	1
Ppia	0.000356531	0.331854	0.852	0.831	1
Tmem91	0.000359541	-0.310463	0.231	0.356	1
Ppp2r3a	0.000364995	0.276566	0.631	0.525	1
D030068K23Rik	0.000401445	0.281079	0.593	0.471	1
Khdrbs2	0.000402074	-0.316714	0.81	0.885	1
Icam5	0.00040418	-0.253883	0.438	0.548	1
Rasl11b	0.000411937	-0.25105	0.293	0.437	1
Sik3	0.000418123	-0.250856	0.614	0.701	1
Kcnmb4	0.000448461	-0.279617	0.524	0.617	1
Ipcef1	0.000461135	-0.257659	0.79	0.828	1
Srcin1	0.000495489	-0.270749	0.766	0.831	1
Pcdh10	0.000498018	0.263034	0.666	0.533	1
Npas2	0.000592017	-0.267875	0.534	0.651	1
Nr3c1	0.00062554	-0.295663	0.717	0.797	1
Itm2b	0.000648525	0.267827	0.772	0.736	1
Acyp2	0.000651251	0.277276	0.472	0.356	1
Frmd5	0.000916315	0.26851	0.6	0.483	1
Bmpr1b	0.000965187	-0.368738	0.186	0.303	1
Cap2	0.00097227	-0.256383	0.762	0.828	1
Efr3b	0.000990108	-0.257429	0.566	0.667	1
4930509J09Rik	0.00108961	-0.401465	0.245	0.368	1
Adgrl2	0.00109997	0.276504	0.759	0.724	1
Shisa6	0.00110503	-0.511495	0.21	0.318	1
Klhdc10	0.00111634	0.252063	0.752	0.693	1
Tcf4	0.00112725	0.265048	0.81	0.797	1
Adgrb1	0.00118311	-0.254649	0.614	0.69	1
Efna5	0.00127306	0.352278	0.6	0.456	1
Gm15398	0.00133009	-0.253431	0.369	0.49	1
Rheb	0.0013762	-0.253286	0.424	0.529	1
Kcnb2	0.00138649	0.32583	0.583	0.479	1
Cdh12	0.00139679	0.322265	0.672	0.605	1
Col6a1	0.00143339	-0.336428	0.338	0.437	1
Cntn6	0.00148052	0.342684	0.559	0.46	1
Samd5	0.00169688	-0.276477	0.372	0.479	1
Arpp19	0.00202849	-0.254782	0.479	0.575	1
Rit2	0.00211275	0.250177	0.645	0.556	1
Htr1f	0.00292835	0.250908	0.886	0.862	1
Cntn3	0.00296564	0.294843	0.469	0.345	1
Camkmt	0.00324228	0.290827	0.534	0.467	1
Mpped2	0.0036334	0.294821	0.71	0.617	1
6530403H02Rik	0.00484188	0.462939	0.493	0.41	1
Hs3st2	0.0049587	-0.257381	0.734	0.839	1
Cdk14	0.00556815	0.257205	0.845	0.759	1
Gm49678	0.00631548	-0.309976	0.648	0.716	1
E130114P18Rik	0.00769418	0.284292	0.269	0.188	1
9130024F11Rik	0.00840021	0.261239	0.724	0.651	1
Chgb	0.0085984	-0.416721	0.548	0.594	1
Hs3st5	0.0147365	-0.317008	0.59	0.659	1
Ptn	0.0153944	0.253466	0.421	0.333	1
Cdh13	0.0252689	-0.376889	0.507	0.575	1
Unc5c	0.0374484	0.274132	0.414	0.333	1
Nnat	0.0387247	-0.338947	0.293	0.352	1
9630014M24Rik	0.0432333	0.267536	0.4	0.333	1
Iqgap2	0.0499414	-0.272801	0.369	0.418	1
A230006K03Rik	0.051513	0.25088	0.652	0.678	1
Sorcs3	0.0641811	0.375883	0.455	0.402	1
Gm20754	0.0741313	-0.310048	0.39	0.448	1
Ryr3	0.0858378	-0.268633	0.766	0.762	1
Tenm3	0.0881897	0.272984	0.621	0.582	1
Kcnab1	0.0882099	0.325738	0.497	0.456	1
Ccn2	0.0891746	-0.396625	0.262	0.31	1
Egfem1	0.145668	0.257423	0.624	0.579	1
Kirrel3	0.164488	0.293057	0.338	0.291	1
Cadps2	0.220467	-0.279672	0.848	0.854	1

[truncated: 5 more sheets: thiamine_cluster10R61thiaminevs, thiamine_cluster11R61thiaminevs, thiamine_cluster12R61thiaminevs, thiamine_cluster13R61thiaminevs, Sheet1]
