# Supplementary material for: Huntington disease oligodendrocyte maturation deficits revealed by single-nucleus RNAseq are rescued by thiamine-biotin supplementation
Source: Nat Commun. 2022 Dec 21;13:7791. doi: 10.1038/s41467-022-35388-x (PMC9772349; doi:10.1038/s41467-022-35388-x)
Supplement: Supplementary file 16 — Source Data [file 41467_2022_35388_MOESM16_ESM.zip]

Archive with 2 entries (2 files):
- Source Data/Source Data File 1 15NOV2022 NCOMMS-21-24870B_Thompson v2.pdf
- Source Data/Source Data File 2 15NOV2022 NCOMMS-21-24870B_Thompson v3.xlsx
