# Supplementary material for: Huntington disease oligodendrocyte maturation deficits revealed by single-nucleus RNAseq are rescued by thiamine-biotin supplementation
Source: Nat Commun. 2022 Dec 21;13:7791. doi: 10.1038/s41467-022-35388-x (PMC9772349; doi:10.1038/s41467-022-35388-x)
Supplement: Supplementary file 16 — Source Data [file 41467_2022_35388_MOESM16_ESM.zip › Source Data/Source Data File 2 15NOV2022 NCOMMS-21-24870B_Thompson v3.xlsx]

## Sheet: Figure 7c
Figure 7c - Normalized values
		PKCe Cingulate			PKCe Caudate
		1.35	0.36		1.73	0.57
		1.43	1.09		1.33	0.9
		1.38	0.69		1.13	0.28
		1.44	0.75			0.36
		1.5	0.84			0.65
			0.55			0.58
			0.79			0.61
			1.06			0.29
			0.98			0.78
			1.3			0.06
			1.09			0.37
			0.73
		p-PKCe Cingulate			p-PKCe Caudate
		1.83	0.18		1.56	1.38
		2.13	0.56		1.62	0.9
		1.88	0.27		1.61	0.52
		2.08	0.28			1.03
		2.01	0.27			0.66
			0.19			0.7
			0.36			1.68
			0.32			0.67
			0.88			1.37
			1.39			0.8
			1.18			1.4
			0.33

## Sheet: Figure 7e
Figure 7e
								Prkce
		PKCe Cortex				pPKCe Cortex				pPKCe/Total PKCe Cortex
	Sample	NT-Cortex	HD-Cortex		Sample	NT-Cortex	HD-Cortex		Sample	NT-Cortex	HD-Cortex
	1	5558	4940		1	2315.3	2154.37		1	0.416533	0.436092
	2	5657	4777		2	1954.77	1909.3		2	0.345545	0.399609
	3	6046	5883		3	2241.34	2081		3	0.370666	0.353696
	4	6434	5334		4	2744.8	1833.24		4	0.426588	0.343654
	5	6266	5297		5	2505.62	2014.46		5	0.399863	0.380271
	6	6352	5508		6	2385.03	2152.06		6	0.375466	0.390713
		PKCe Striatum				pPKCe Striatum				pPKCe/Total PKCe Striatum
	Sample	NT-Striatum	HD-Striatum		Sample	NT-Striatum	HD-Striatum		Sample	NT-Striatum	HD-Striatum
	1	4294	3604		1	1389.51	1284.4		1	0.323597	0.356398
	2	3858	3914		2	1273.75	1312.02		2	0.33012	0.335213
	3	4585	3834		3	1406.68	1276.93		3	0.306788	0.333035
	4	4098	4012		4	1483.99	1348.17		4	0.362144	0.335975
	5	4685	4073		5	1371.23	1268.01		5	0.292661	0.311303
	6	4109	3913		6	1261.18	1270.24		6	0.306909	0.324649
				TPK1	mouse
		TPK1 dimer Cortex				TPK1 Cortex
	Sample	NT-Cortex	HD-Cortex		Sample	NT-Cortex	HD-Cortex
	1	428.032	1183.56		1	3696.6	4303.35
	2	601.584	1291.17		2	4146.91	4384.58
	3	852.899	1114.19		3	4399.09	3835.75
	4	921.429	1195.96		4	4163.43	4431.33
	5	1022.19	2335.67		5	4254.63	4799.06
	6	993.544	1470.39		6	3961.92	4805.08
		TPK1 dimer Striatum				TPK1 Striatum
	Sample	NT-Striatum	HD-Striatum		Sample	NT-Striatum	HD-Striatum
	1	509.057	1352.7		1	4295.83	3527.26
	2	682.029	1414.53		2	3852.86	3224.55
	3	779.916	1227.13		3	3561.16	3424.21
	4	978.434	1153.39		4	3483.1	3217.81
	5	1019.63	1228.24		5	3452.92	3294.17
	6	987.194	1233.48		6	3215.49	3215.41

## Sheet: Figure 7g
Figure 7g
		TPK1	human
	Sample	Group	TPK1 dimer	TPK1
	01	CTRL	122.075	2778.65
	02	CTRL	72.5041	1815.03
	03	CTRL	100.158	2781.39
	04	HD-I	111.715	1073.87
	05	HD-I	91.4889	2820.65
	06	HD-I	52.1026	1212.59
	07	HD-II	54.8198	2316.31
	08	HD-II	60.2604	2283.22
	09	HD-II	20.2051	1815.49
	10	HD-II	66.1598	2109.36
	11	HD-III	83.2448	1098.05
	12	HD-III	8.41733	877.412
	13	HD-III	6.63073	1119.93
	14	HD-IV	53.5265	1854.05
	15	HD-IV	6.33874	140.708
	16	HD-IV	31.2386	1546.01
	17	HD-IV	39.0927	1797.14
	18	HD-IV	1.37428	392.445
	19	HD-J	46.9205	967.775
	20	HD-J	19.1485	423.925
	21	HD-J	4.7295	268.466
	22	HD-J	13.4341	1560.5

## Sheet: Figure 7h
Figure 7h
		ID	Grade	DAG Levels
		T5300	HD3	0.277689
		T779	Control	1.10013
		T5476	HD3	0.322276
		T4518	Control	0.719183
		T4638	HD-J	0.571195
		T174	Control	0.935883
		T4812	Control	1.14746
		T159	Control	1.0696
		T4929	HD4	0.587971
		T4915	Control	0.541224
		T5321	HD4	0.178138
		T5286	HD2	0.49616
		T5693	HD2	0.188905
		T1905	HD-J	0.516009
		T4273	HD4	0.470769
		T4110	HD4	0.993503
		T5798	HD1	0.152746
		T178	HD-J	0.426259
		T5266	HD1	0.208226
		T5714	HD-J	0.346281
		T3859	HD-J	0.237805
		T5534	HD-J	0.145805
		T4285	HD1	0.51511
		T5775	HD-J	0.452149
		T5263	HD2	0.178177
		T4501	HD-J	0.266731
		T5700	Control	0.267329

## Sheet: Figure 7i
Figure 7i -normalized values
	OL Prkce		OPC Prkce		MOG
	Control	Prkce KD	Control	Prkce KD	Control	Prkce KD
	1.05562	0.098566	1.3618	0.310747	1.32	2.03
	1.01536	0.267999	0.81042	0.265035	1.27	1.83
	0.964493	0.083493	1.13543	0.223042	1.3	2.1

## Sheet: Figure S8c
Figure S8c - Normalized values
	Caudate SGK			Cingulate SGK
	Control	HD		Control	HD
	100	14.1		100	23.63
	76.17	60.71		109.84	128.91
	100.42	0.16		116.53	48.54
		3.62		92.67	27.15
		14.7		128.99	75.4
		6.09			61.11
		15.56			60.46
		4.21			103.79
		20.99			98.93
		1.92			135.73
		1.19			32.13
	MBP cingulate				MBP Caudate
	1.12	0.98			1.04	2.71
	1.43	0.89			1.09	1.04
	1.71	1.61			1.75	2.16
	0.83	1.25				1.8
	0.73	0.65				2.18
		1.32				1.9
		0.87				3.42
		1.36				3.2
		0.66				1.5
		1.68				1.98
		0.75				3.6
		0.53

## Sheet: Figure S8e
Figure S8e		case	Condition	MBP:CA2
		1	Control	243.52
		2	Control	673.23
		3	Control	351.1
		4	Control	324.22
		5	HD	118.96
		6	HD	135.33
		7	HD	131.08

## Sheet: Figure S9b-c
Figure S9b-c		Case	% CA2 +ve Parenchyma	Cell density Parenchyma	Condition
		1	19.49	0.00062971	Cont
		2	16.89	0.000752062	Cont
		3	24.555	0.00126157	Cont
		4	23.6	0.000426086	Cont
		5	12.91	0.000421555	Cont
		6	27.94	0.000912955	Cont
		7	25.04	0.0013639	HD
		8	17.99	0.00163374	HD
		9	93.43	0.00174591	HD
		10	86.7667	0.00155346	HD
		11	67.61	0.00145097	HD
		12	23.525	0.00157864	HD
		13	59.815	0.0015697	HD
		14	13.585	0.0010297	HD

## Sheet: Figure S9d
Figure S9d		case	total	Positive	PercentageCA2+	Condition
		1	27184	6433	0.236647	HD
		2	12672	2807	0.221512	HD
		3	19714	3649	0.185097	Con
		4	42722	3985	0.0932775	Con
		5	14954	1106	0.0739601	Con
		6	14782	2382	0.161142	Con
		7	15476	1478	0.0955027	Con
		8	21096	5069	0.240283	HD
		9	28013	8404	0.300004	HD
		10	4758	647	0.135982	Con

## Sheet: Figure S9f
Figure S9f
		Prkce
			PKCe/Insolb Cortex
		Sample	NT-Cortex	HD-Cortex
		1	2660	1563
		2	2707	2044
		3	2475	2005
		4	2723	2128
			PKCe/Insolb Striatum
		Sample	NT-Striatum	HD-Striatum
		1	592	428
		2	587	457
		3	695	482
		4	620	402
			Dgkb				Sgk1				Gpi1
			Dgkb Cortex				Sgk1 Cortex				Gpi1 Cortex
		Sample	NT-Cortex	HD-Cortex		Sample	NT-Cortex	HD-Cortex		Sample	NT-Cortex	HD-Cortex
		1	106.273	93.2389		1	1415.27	1296.51		1	1769.79	1851.3
		2	72.2266	96.236		2	1722.86	1445.85		2	2072.56	2615.76
		3	115.354	107.336		3	1455.12	1538.77		3	1246.79	2269.32
		4	111.332	103.694		4	1455.9	1406.61		4	992.718	2579.61
		5	93.6017	93.1455		5	1508.02	1157.03		5	1278.81	1074.95
		6	89.7729	115.574		6	1566.58	1139.77		6	1452.51	1696.52
			Dgkb Striatum				Sgk1 Striatum				Gpi1 Striatum
		Sample	NT-Striatum	HD-Striatum		Sample	NT-Striatum	HD-Striatum		Sample	NT-Striatum	HD-Striatum
		1	114.359	61.9019		1	563.946	719.699		1	799.62	1942.87
		2	150.692	64.6926		2	696.482	768.279		2	816.929	2192.05
		3	173.155	86.6271		3	870.781	788.877		3	780.151	2262.39
		4	132.946	81.5534		4	808.121	922.777		4	802.42	2783.51
		5	164.237	79.8677		5	769.918	919.874		5	1262.49	2942.53
		6	189.74	97.5209		6	980.725	844.786		6	2013.4	2958.73

[truncated: 2 more sheets: Figure S9h, Figure S9i]
